# Supplementary material for: A comparison of sea salt emission parameterizations in northwestern Europe using a chemistry transport model setup
Source: Copernicus journal article supplement (doi:10.5194/acp-16-9905-2016), 2016-08-08
Supplement: Supplementary file 1 [file acp-16-9905-2016-supplement.zip]

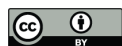

## Supplement of

# A comparison of sea salt emission parameterizations in northwestern Europe using a chemistry transport model setup

Daniel Neumann et al.

Correspondence to: Daniel Neumann (daniel.neumann@hzg.de)

- [acp-16-9905-2016-supplement-title-page.pdf](#)
- [aod](#)
  - EXTvPM25.CD24\_effectSeaSalt.v5.base\_cb05tucl\_ae5\_aq\_ssa\_L2\_LWC\_BEL\_2008001-2008060
  - EXTvPM25.CD24\_effectSeaSalt.v5.base\_cb05tucl\_ae5\_aq\_ssa\_L2\_LWC\_BEL\_2008183-2008243
  - EXTvPM25.CD24\_effectSeaSalt.v5.base\_cb05tucl\_ae5\_aq\_ssa\_L2\_LWC\_BRU\_2008001-2008060
  - EXTvPM25.CD24\_effectSeaSalt.v5.base\_cb05tucl\_ae5\_aq\_ssa\_L2\_LWC\_BRU\_2008183-2008243
  - EXTvPM25.CD24\_effectSeaSalt.v5.base\_cb05tucl\_ae5\_aq\_ssa\_L2\_LWC\_CAB\_2008001-2008060
  - EXTvPM25.CD24\_effectSeaSalt.v5.base\_cb05tucl\_ae5\_aq\_ssa\_L2\_LWC\_CAB\_2008183-2008243
  - EXTvPM25.CD24\_effectSeaSalt.v5.base\_cb05tucl\_ae5\_aq\_ssa\_L2\_LWC\_DUN\_2008001-2008060
  - EXTvPM25.CD24\_effectSeaSalt.v5.base\_cb05tucl\_ae5\_aq\_ssa\_L2\_LWC\_DUN\_2008183-2008243
  - EXTvPM25.CD24\_effectSeaSalt.v5.base\_cb05tucl\_ae5\_aq\_ssa\_L2\_LWC\_GDA\_2008001-2008060
  - EXTvPM25.CD24\_effectSeaSalt.v5.base\_cb05tucl\_ae5\_aq\_ssa\_L2\_LWC\_GDA\_2008183-2008243
  - EXTvPM25.CD24\_effectSeaSalt.v5.base\_cb05tucl\_ae5\_aq\_ssa\_L2\_LWC\_HGL\_2008001-2008060
  - EXTvPM25.CD24\_effectSeaSalt.v5.base\_cb05tucl\_ae5\_aq\_ssa\_L2\_LWC\_HGL\_2008183-2008243
  - EXTvPM25.CD24\_effectSeaSalt.v5.base\_cb05tucl\_ae5\_aq\_ssa\_L2\_LWC\_HHG\_2008001-2008060
  - EXTvPM25.CD24\_effectSeaSalt.v5.base\_cb05tucl\_ae5\_aq\_ssa\_L2\_LWC\_HHG\_2008183-2008243
  - EXTvPM25.CD24\_effectSeaSalt.v5.base\_cb05tucl\_ae5\_aq\_ssa\_L2\_LWC\_HLL\_2008001-2008060
  - EXTvPM25.CD24\_effectSeaSalt.v5.base\_cb05tucl\_ae5\_aq\_ssa\_L2\_LWC\_HLL\_2008183-2008243
  - EXTvPM25.CD24\_effectSeaSalt.v5.base\_cb05tucl\_ae5\_aq\_ssa\_L2\_LWC\_HLS\_2008001-2008060
  - EXTvPM25.CD24\_effectSeaSalt.v5.base\_cb05tucl\_ae5\_aq\_ssa\_L2\_LWC\_HLS\_2008183-2008243
  - EXTvPM25.CD24\_effectSeaSalt.v5.base\_cb05tucl\_ae5\_aq\_ssa\_L2\_LWC\_HYY\_2008001-2008060
  - EXTvPM25.CD24\_effectSeaSalt.v5.base\_cb05tucl\_ae5\_aq\_ssa\_L2\_LWC\_HYY\_2008183-2008243
  - EXTvPM25.CD24\_effectSeaSalt.v5.base\_cb05tucl\_ae5\_aq\_ssa\_L2\_LWC\_KUO\_2008001-2008060
  - EXTvPM25.CD24\_effectSeaSalt.v5.base\_cb05tucl\_ae5\_aq\_ssa\_L2\_LWC\_KUO\_2008183-2008243

- [illegible]

- EXTvPM25.CD24\_effectSeaSalt.v5.base\_cb05tucl\_ae5\_aq\_ssa\_L2\_OD\_REC\_MIN\_2008001-2008060
- EXTvPM25.CD24\_effectSeaSalt.v5.base\_cb05tucl\_ae5\_aq\_ssa\_L2\_OD\_REC\_MIN\_2008183-2008243
- EXTvPM25.CD24\_effectSeaSalt.v5.base\_cb05tucl\_ae5\_aq\_ssa\_L2\_OD\_REC\_OOS\_2008001-2008060
- EXTvPM25.CD24\_effectSeaSalt.v5.base\_cb05tucl\_ae5\_aq\_ssa\_L2\_OD\_REC\_OOS\_2008183-2008243
- EXTvPM25.CD24\_effectSeaSalt.v5.base\_cb05tucl\_ae5\_aq\_ssa\_L2\_OD\_REC\_PAL\_2008001-2008060
- EXTvPM25.CD24\_effectSeaSalt.v5.base\_cb05tucl\_ae5\_aq\_ssa\_L2\_OD\_REC\_PAL\_2008183-2008243
- EXTvPM25.CD24\_effectSeaSalt.v5.base\_cb05tucl\_ae5\_aq\_ssa\_L2\_OD\_REC\_TOR\_2008001-2008060
- EXTvPM25.CD24\_effectSeaSalt.v5.base\_cb05tucl\_ae5\_aq\_ssa\_L2\_OD\_REC\_TOR\_2008183-2008243
- README

- cmaq

- AERO\_EMIS.F
- GRIDDESC
- OCEAN\_CD24\_noSalt\_GIS.nc
- OCEAN\_CD24\_sf000m\_GIS\_ubound.nc
- OCEAN\_CD24\_sf050m\_GIS\_ubound.nc
- OCEAN\_CD24\_sf050m\_GIS\_ubound\_sal.nc
- OCEAN\_CD72\_noSalt\_GIS.nc
- OCEAN\_CD72\_sf000m\_GIS\_ubound.nc
- OCEAN\_CD72\_sf050m\_GIS\_ubound.nc
- OCEAN\_CD72\_sf050m\_GIS\_ubound\_sal.nc
- README\_CMAQ
- README\_CMAQ
- SSEMIS.F
- run.cctm.5.0.1.CD24\_ov13.mode.csh

- conc

- conc.timeseries.values.sum2008.base.Na.DE0001R.csv
- conc.timeseries.values.sum2008.base.Na.DE0002R.csv
- conc.timeseries.values.sum2008.base.Na.DE0044R.csv
- conc.timeseries.values.sum2008.base.Na.moreStations.csv
- conc.timeseries.values.sum2008.ov14.Na.DE0001R.csv
- conc.timeseries.values.sum2008.ov14.Na.DE0002R.csv
- conc.timeseries.values.sum2008.ov14.Na.DE0044R.csv
- conc.timeseries.values.sum2008.ov14.Na.moreStations.csv
- conc.timeseries.values.sum2008.sp13.Na.DE0001R.csv
- conc.timeseries.values.sum2008.sp13.Na.DE0002R.csv
- conc.timeseries.values.sum2008.sp13.Na.DE0044R.csv
- conc.timeseries.values.sum2008.sp13.Na.moreStations.csv
- conc.timeseries.values.sum2008.zero.Na.DE0001R.csv
- conc.timeseries.values.sum2008.zero.Na.DE0002R.csv
- conc.timeseries.values.sum2008.zero.Na.DE0044R.csv
- conc.timeseries.values.sum2008.zero.Na.moreStations.csv

- conc.timeseries.values.win2008.base.Na.DE0001R.csv
- conc.timeseries.values.win2008.base.Na.DE0002R.csv
- conc.timeseries.values.win2008.base.Na.DE0044R.csv
- conc.timeseries.values.win2008.base.Na.moreStations.csv
- conc.timeseries.values.win2008.ov14.Na.DE0001R.csv
- conc.timeseries.values.win2008.ov14.Na.DE0002R.csv
- conc.timeseries.values.win2008.ov14.Na.DE0044R.csv
- conc.timeseries.values.win2008.ov14.Na.moreStations.csv
- conc.timeseries.values.win2008.sp13.Na.DE0001R.csv
- conc.timeseries.values.win2008.sp13.Na.DE0002R.csv
- conc.timeseries.values.win2008.sp13.Na.DE0044R.csv
- conc.timeseries.values.win2008.sp13.Na.moreStations.csv
- conc.timeseries.values.win2008.zero.Na.DE0001R.csv
- conc.timeseries.values.win2008.zero.Na.DE0002R.csv
- conc.timeseries.values.win2008.zero.Na.DE0044R.csv
- conc.timeseries.values.win2008.zero.Na.moreStations.csv
- input\_files
  - CD24
    - \* pub.neumannnd.dummy\_data.sea\_salt.CD24.2008370.nc
  - COORDS
    - \* coords\_CD24\_ROWCOL.nc
    - \* coords\_CD72\_ROWCOL.nc
  - LW\_MASK\_CD24.nc
  - LW\_MASK\_CD72.nc
  - griddef\_CMAQ\_CD24
  - griddef\_CMAQ\_CD72
- neumann\_et\_al\_2016b\_suppl.pdf
- output\_example
  - CD24
    - \* ssemis\_CD24\_ae5\_OCnSZnSL\_ov14\_mode4\_2008370
    - \* ssemis\_CD24\_ae5\_OCwSZnSL\_sp13\_mode3\_2008370
- ssemis
  - README\_PRODUCE\_SSEMIS
  - run\_ov14\_and\_sp13\_example.sh
  - ssemis\_log\_version.txt
  - ssemis\_v4.0.1
    - \* .Rhistory
    - \* ssemis\_calc\_ov14.R
    - \* ssemis\_calc\_sp13.R
    - \* ssemis\_funs.R
    - \* ssemis\_main\_ovadnevaite.R

- \* ssemis\_main\_spada.R
  - \* ssemis\_params.R
  - \* ssemis\_versioning.R
- tools
  - \* sharqawy2010
- wetdep
  - wetdep.timeseries.values.DE0002R.base.moreStations.csv
  - wetdep.timeseries.values.DE0002R.ov14.moreStations.csv
  - wetdep.timeseries.values.DE0002R.sp13.moreStations.csv
  - wetdep.timeseries.values.DE0002R.zero.moreStations.csv
  - wetdep.timeseries.values.DE0007R.base.moreStations.csv
  - wetdep.timeseries.values.DE0007R.ov14.moreStations.csv
  - wetdep.timeseries.values.DE0007R.sp13.moreStations.csv
  - wetdep.timeseries.values.DE0007R.zero.moreStations.csv
  - wetdep.timeseries.values.LT0015R.base.moreStations.csv
  - wetdep.timeseries.values.LT0015R.ov14.moreStations.csv
  - wetdep.timeseries.values.LT0015R.sp13.moreStations.csv
  - wetdep.timeseries.values.LT0015R.zero.moreStations.csv
  - wetdep.timeseries.values.LV0010R.base.moreStations.csv
  - wetdep.timeseries.values.LV0010R.ov14.moreStations.csv
  - wetdep.timeseries.values.LV0010R.sp13.moreStations.csv
  - wetdep.timeseries.values.LV0010R.zero.moreStations.csv
  - wetdep.timeseries.values.LV0016R.base.moreStations.csv
  - wetdep.timeseries.values.LV0016R.ov14.moreStations.csv
  - wetdep.timeseries.values.LV0016R.sp13.moreStations.csv
  - wetdep.timeseries.values.LV0016R.zero.moreStations.csv
  - wetdep.timeseries.values.NO0001R.base.moreStations.csv
  - wetdep.timeseries.values.NO0001R.ov14.moreStations.csv
  - wetdep.timeseries.values.NO0001R.sp13.moreStations.csv
  - wetdep.timeseries.values.NO0001R.zero.moreStations.csv
  - wetdep.timeseries.values.NO0015R.base.moreStations.csv
  - wetdep.timeseries.values.NO0015R.ov14.moreStations.csv
  - wetdep.timeseries.values.NO0015R.sp13.moreStations.csv
  - wetdep.timeseries.values.NO0015R.zero.moreStations.csv
  - wetdep.timeseries.values.NO0039R.base.moreStations.csv
  - wetdep.timeseries.values.NO0039R.ov14.moreStations.csv
  - wetdep.timeseries.values.NO0039R.sp13.moreStations.csv
  - wetdep.timeseries.values.NO0039R.zero.moreStations.csv
  - wetdep.timeseries.values.NO0056R.base.moreStations.csv
  - wetdep.timeseries.values.NO0056R.ov14.moreStations.csv
  - wetdep.timeseries.values.NO0056R.sp13.moreStations.csv
  - wetdep.timeseries.values.NO0056R.zero.moreStations.csv

- wetdep.timeseries.values.NO0218R.base.moreStations.csv
- wetdep.timeseries.values.NO0218R.ov14.moreStations.csv
- wetdep.timeseries.values.NO0218R.sp13.moreStations.csv
- wetdep.timeseries.values.NO0218R.zero.moreStations.csv
- wetdep.timeseries.values.PL0002R.base.moreStations.csv
- wetdep.timeseries.values.PL0002R.ov14.moreStations.csv
- wetdep.timeseries.values.PL0002R.sp13.moreStations.csv
- wetdep.timeseries.values.PL0002R.zero.moreStations.csv
- wetdep.timeseries.values.PL0004R.base.moreStations.csv
- wetdep.timeseries.values.PL0004R.ov14.moreStations.csv
- wetdep.timeseries.values.PL0004R.sp13.moreStations.csv
- wetdep.timeseries.values.PL0004R.zero.moreStations.csv
- wetdep.timeseries.values.PL0005R.base.moreStations.csv
- wetdep.timeseries.values.PL0005R.ov14.moreStations.csv
- wetdep.timeseries.values.PL0005R.sp13.moreStations.csv
- wetdep.timeseries.values.PL0005R.zero.moreStations.csv
- wetdep.timeseries.values.SE0014R.base.moreStations.csv
- wetdep.timeseries.values.SE0014R.ov14.moreStations.csv
- wetdep.timeseries.values.SE0014R.sp13.moreStations.csv
- wetdep.timeseries.values.SE0014R.zero.moreStations.csv

The copyright of individual parts of the supplement might differ from the CC-BY 3.0 licence.
