# Supplementary material for: A comparison of sea salt emission parameterizations in northwestern Europe using a chemistry transport model setup
Source: Copernicus journal article supplement (doi:10.5194/acp-16-9905-2016), 2016-08-08
Supplement: Supplementary file 2 [file acp-16-9905-2016-supplement.zip]

Archive with 215 entries (202 files):
- conc/
- conc/conc.timeseries.values.sum2008.base.Na.moreStations.csv
- conc/conc.timeseries.values.win2008.zero.Na.DE0001R.csv
- conc/conc.timeseries.values.win2008.base.Na.moreStations.csv
- conc/conc.timeseries.values.win2008.sp13.Na.moreStations.csv
- conc/conc.timeseries.values.win2008.ov14.Na.DE0002R.csv
- conc/conc.timeseries.values.win2008.base.Na.DE0044R.csv
- conc/conc.timeseries.values.win2008.ov14.Na.DE0044R.csv
- conc/conc.timeseries.values.win2008.ov14.Na.moreStations.csv
- conc/conc.timeseries.values.win2008.sp13.Na.DE0002R.csv
- conc/conc.timeseries.values.sum2008.ov14.Na.DE0001R.csv
- conc/conc.timeseries.values.sum2008.ov14.Na.DE0002R.csv
- conc/conc.timeseries.values.win2008.zero.Na.moreStations.csv
- conc/conc.timeseries.values.sum2008.zero.Na.DE0002R.csv
- conc/conc.timeseries.values.sum2008.sp13.Na.DE0002R.csv
- conc/conc.timeseries.values.sum2008.sp13.Na.moreStations.csv
- conc/conc.timeseries.values.sum2008.ov14.Na.DE0044R.csv
- conc/conc.timeseries.values.sum2008.zero.Na.DE0044R.csv
- conc/conc.timeseries.values.win2008.base.Na.DE0002R.csv
- conc/conc.timeseries.values.win2008.zero.Na.DE0002R.csv
- conc/conc.timeseries.values.sum2008.sp13.Na.DE0044R.csv
- conc/conc.timeseries.values.sum2008.ov14.Na.moreStations.csv
- conc/conc.timeseries.values.sum2008.base.Na.DE0002R.csv
- conc/conc.timeseries.values.win2008.ov14.Na.DE0001R.csv
- conc/conc.timeseries.values.sum2008.zero.Na.DE0001R.csv
- conc/conc.timeseries.values.sum2008.base.Na.DE0001R.csv
- conc/conc.timeseries.values.sum2008.base.Na.DE0044R.csv
- conc/conc.timeseries.values.win2008.sp13.Na.DE0044R.csv
- conc/conc.timeseries.values.win2008.sp13.Na.DE0001R.csv
- conc/conc.timeseries.values.win2008.base.Na.DE0001R.csv
- conc/conc.timeseries.values.sum2008.sp13.Na.DE0001R.csv
- conc/conc.timeseries.values.win2008.zero.Na.DE0044R.csv
- conc/conc.timeseries.values.sum2008.zero.Na.moreStations.csv
- acp-16-9905-2016-supplement-title-page.pdf
- cmaq/
- cmaq/OCEAN_CD24_sf050m_GIS_ubound_sal.nc
- cmaq/run.cctm.5.0.1.CD24_ov13.mode.csh
- cmaq/SSEMIS.F
- cmaq/OCEAN_CD24_noSalt_GIS.nc
- cmaq/README_CMAQ
- cmaq/AERO_EMIS.F
- cmaq/OCEAN_CD72_noSalt_GIS.nc
- cmaq/OCEAN_CD72_sf000m_GIS_ubound.nc
- cmaq/README_CMAQ~
- cmaq/OCEAN_CD72_sf050m_GIS_ubound_sal.nc
- cmaq/OCEAN_CD24_sf050m_GIS_ubound.nc
- cmaq/GRIDDESC
- cmaq/OCEAN_CD24_sf000m_GIS_ubound.nc
- cmaq/OCEAN_CD72_sf050m_GIS_ubound.nc
- output_example/
- output_example/CD24/
- output_example/CD24/ssemis_CD24_ae5_OCwSZnSL_sp13_mode3_2008370
- output_example/CD24/ssemis_CD24_ae5_OCnSZnSL_ov14_mode4_2008370
- wetdep/
- wetdep/wetdep.timeseries.values.DE0007R.zero.moreStations.csv
- wetdep/wetdep.timeseries.values.PL0002R.base.moreStations.csv
- wetdep/wetdep.timeseries.values.NO0056R.zero.moreStations.csv
- wetdep/wetdep.timeseries.values.PL0005R.base.moreStations.csv
- wetdep/wetdep.timeseries.values.NO0056R.base.moreStations.csv
- wetdep/wetdep.timeseries.values.PL0002R.sp13.moreStations.csv
- wetdep/wetdep.timeseries.values.NO0015R.sp13.moreStations.csv
- wetdep/wetdep.timeseries.values.DE0002R.sp13.moreStations.csv
- wetdep/wetdep.timeseries.values.NO0056R.sp13.moreStations.csv
- wetdep/wetdep.timeseries.values.PL0005R.sp13.moreStations.csv
- wetdep/wetdep.timeseries.values.PL0004R.zero.moreStations.csv
- wetdep/wetdep.timeseries.values.NO0039R.zero.moreStations.csv
- wetdep/wetdep.timeseries.values.PL0002R.ov14.moreStations.csv
- wetdep/wetdep.timeseries.values.LV0010R.base.moreStations.csv
- wetdep/wetdep.timeseries.values.LV0016R.sp13.moreStations.csv
- wetdep/wetdep.timeseries.values.NO0218R.zero.moreStations.csv
- wetdep/wetdep.timeseries.values.SE0014R.base.moreStations.csv
- wetdep/wetdep.timeseries.values.LV0016R.ov14.moreStations.csv
- wetdep/wetdep.timeseries.values.DE0007R.sp13.moreStations.csv
- wetdep/wetdep.timeseries.values.PL0005R.zero.moreStations.csv
- wetdep/wetdep.timeseries.values.LT0015R.base.moreStations.csv
- wetdep/wetdep.timeseries.values.NO0218R.base.moreStations.csv
- wetdep/wetdep.timeseries.values.PL0002R.zero.moreStations.csv
- wetdep/wetdep.timeseries.values.SE0014R.sp13.moreStations.csv
- wetdep/wetdep.timeseries.values.NO0218R.ov14.moreStations.csv
- wetdep/wetdep.timeseries.values.NO0056R.ov14.moreStations.csv
- wetdep/wetdep.timeseries.values.DE0002R.base.moreStations.csv
- wetdep/wetdep.timeseries.values.LV0010R.ov14.moreStations.csv
- wetdep/wetdep.timeseries.values.LV0016R.base.moreStations.csv
- wetdep/wetdep.timeseries.values.DE0002R.ov14.moreStations.csv
- wetdep/wetdep.timeseries.values.LT0015R.zero.moreStations.csv
- wetdep/wetdep.timeseries.values.DE0007R.ov14.moreStations.csv
- wetdep/wetdep.timeseries.values.NO0015R.ov14.moreStations.csv
- wetdep/wetdep.timeseries.values.NO0001R.zero.moreStations.csv
- wetdep/wetdep.timeseries.values.PL0004R.base.moreStations.csv
- wetdep/wetdep.timeseries.values.LV0010R.sp13.moreStations.csv
- wetdep/wetdep.timeseries.values.LT0015R.ov14.moreStations.csv
- wetdep/wetdep.timeseries.values.SE0014R.zero.moreStations.csv
- wetdep/wetdep.timeseries.values.NO0039R.sp13.moreStations.csv
- wetdep/wetdep.timeseries.values.NO0015R.zero.moreStations.csv
- wetdep/wetdep.timeseries.values.NO0218R.sp13.moreStations.csv
- wetdep/wetdep.timeseries.values.NO0001R.sp13.moreStations.csv
- wetdep/wetdep.timeseries.values.LV0010R.zero.moreStations.csv
- wetdep/wetdep.timeseries.values.PL0004R.sp13.moreStations.csv
- wetdep/wetdep.timeseries.values.LV0016R.zero.moreStations.csv
- wetdep/wetdep.timeseries.values.LT0015R.sp13.moreStations.csv
- wetdep/wetdep.timeseries.values.PL0004R.ov14.moreStations.csv
- wetdep/wetdep.timeseries.values.SE0014R.ov14.moreStations.csv
- wetdep/wetdep.timeseries.values.NO0001R.base.moreStations.csv
- wetdep/wetdep.timeseries.values.PL0005R.ov14.moreStations.csv
- wetdep/wetdep.timeseries.values.NO0039R.ov14.moreStations.csv
- wetdep/wetdep.timeseries.values.NO0015R.base.moreStations.csv
- wetdep/wetdep.timeseries.values.DE0002R.zero.moreStations.csv
- wetdep/wetdep.timeseries.values.DE0007R.base.moreStations.csv
- wetdep/wetdep.timeseries.values.NO0039R.base.moreStations.csv
- wetdep/wetdep.timeseries.values.NO0001R.ov14.moreStations.csv
- neumann_et_al_2016b_suppl.pdf
- ssemis/
- ssemis/run_ov14_and_sp13_example.sh
- ssemis/ssemis_log_version.txt
- ssemis/tools/
- ssemis/tools/sharqawy2010/
- ssemis/tools/sharqawy2010/SW_tools.R
- ssemis/tools/sharqawy2010/SWkviscosity.R
- ssemis/tools/sharqawy2010/SWviscosity.R
- ssemis/tools/sharqawy2010/.Rhistory
- ssemis/tools/sharqawy2010/SWdensity.R
- ssemis/README_PRODUCE_SSEMIS
- ssemis/ssemis_v4.0.1/
- ssemis/ssemis_v4.0.1/ssemis_funs.R
- ssemis/ssemis_v4.0.1/ssemis_params.R
- ssemis/ssemis_v4.0.1/ssemis_calc_ov14.R
- ssemis/ssemis_v4.0.1/ssemis_calc_sp13.R
- ssemis/ssemis_v4.0.1/ssemis_main_spada.R
- ssemis/ssemis_v4.0.1/.Rhistory
- ssemis/ssemis_v4.0.1/ssemis_versioning.R
- ssemis/ssemis_v4.0.1/ssemis_main_ovadnevaite.R
- input_files/
- input_files/LW_MASK_CD72.nc
- input_files/griddef_CMAQ_CD24
- input_files/CD24/
- input_files/CD24/pub.neumannd.dummy_data.sea_salt.CD24.2008370.nc
- input_files/griddef_CMAQ_CD72
- input_files/COORDS/
- input_files/COORDS/coords_CD72_ROWCOL.nc
- input_files/COORDS/coords_CD24_ROWCOL.nc
- input_files/LW_MASK_CD24.nc
- aod/
- aod/EXTvPM25.CD24_effectSeaSalt.v5.base_cb05tucl_ae5_aq_ssa_L2_LWC_GDA_2008001-2008060
- aod/EXTvPM25.CD24_effectSeaSalt.v5.base_cb05tucl_ae5_aq_ssa_L2_OD_REC_BRU_2008183-2008243
- aod/EXTvPM25.CD24_effectSeaSalt.v5.base_cb05tucl_ae5_aq_ssa_L2_OD_REC_BEL_2008183-2008243
- aod/EXTvPM25.CD24_effectSeaSalt.v5.base_cb05tucl_ae5_aq_ssa_L2_OD_REC_HLS_2008001-2008060
- aod/EXTvPM25.CD24_effectSeaSalt.v5.base_cb05tucl_ae5_aq_ssa_L2_OD_REC_HHG_2008001-2008060
- aod/EXTvPM25.CD24_effectSeaSalt.v5.base_cb05tucl_ae5_aq_ssa_L2_LWC_KUO_2008183-2008243
- aod/EXTvPM25.CD24_effectSeaSalt.v5.base_cb05tucl_ae5_aq_ssa_L2_OD_REC_MAI_2008183-2008243
- aod/EXTvPM25.CD24_effectSeaSalt.v5.base_cb05tucl_ae5_aq_ssa_L2_LWC_HLL_2008001-2008060
- aod/EXTvPM25.CD24_effectSeaSalt.v5.base_cb05tucl_ae5_aq_ssa_L2_LWC_CAB_2008001-2008060
- aod/EXTvPM25.CD24_effectSeaSalt.v5.base_cb05tucl_ae5_aq_ssa_L2_LWC_HHG_2008183-2008243
- aod/EXTvPM25.CD24_effectSeaSalt.v5.base_cb05tucl_ae5_aq_ssa_L2_LWC_HGL_2008183-2008243
- aod/EXTvPM25.CD24_effectSeaSalt.v5.base_cb05tucl_ae5_aq_ssa_L2_OD_REC_LEI_2008183-2008243
- aod/EXTvPM25.CD24_effectSeaSalt.v5.base_cb05tucl_ae5_aq_ssa_L2_OD_REC_OOS_2008001-2008060
- aod/EXTvPM25.CD24_effectSeaSalt.v5.base_cb05tucl_ae5_aq_ssa_L2_LWC_LIL_2008183-2008243
- aod/EXTvPM25.CD24_effectSeaSalt.v5.base_cb05tucl_ae5_aq_ssa_L2_OD_REC_LIL_2008001-2008060
- aod/EXTvPM25.CD24_effectSeaSalt.v5.base_cb05tucl_ae5_aq_ssa_L2_OD_REC_MIN_2008183-2008243
- aod/EXTvPM25.CD24_effectSeaSalt.v5.base_cb05tucl_ae5_aq_ssa_L2_OD_REC_TOR_2008183-2008243
- aod/EXTvPM25.CD24_effectSeaSalt.v5.base_cb05tucl_ae5_aq_ssa_L2_OD_REC_BRU_2008001-2008060
- aod/EXTvPM25.CD24_effectSeaSalt.v5.base_cb05tucl_ae5_aq_ssa_L2_OD_REC_KUO_2008001-2008060
- aod/EXTvPM25.CD24_effectSeaSalt.v5.base_cb05tucl_ae5_aq_ssa_L2_OD_REC_TOR_2008001-2008060
- aod/EXTvPM25.CD24_effectSeaSalt.v5.base_cb05tucl_ae5_aq_ssa_L2_OD_REC_HYY_2008183-2008243
- aod/EXTvPM25.CD24_effectSeaSalt.v5.base_cb05tucl_ae5_aq_ssa_L2_OD_REC_BEL_2008001-2008060
- aod/EXTvPM25.CD24_effectSeaSalt.v5.base_cb05tucl_ae5_aq_ssa_L2_OD_REC_DUN_2008001-2008060
- aod/EXTvPM25.CD24_effectSeaSalt.v5.base_cb05tucl_ae5_aq_ssa_L2_OD_REC_HGL_2008183-2008243
- aod/EXTvPM25.CD24_effectSeaSalt.v5.base_cb05tucl_ae5_aq_ssa_L2_LWC_OOS_2008001-2008060
- aod/EXTvPM25.CD24_effectSeaSalt.v5.base_cb05tucl_ae5_aq_ssa_L2_LWC_HGL_2008001-2008060
- aod/EXTvPM25.CD24_effectSeaSalt.v5.base_cb05tucl_ae5_aq_ssa_L2_OD_REC_HYY_2008001-2008060
- aod/README
- aod/EXTvPM25.CD24_effectSeaSalt.v5.base_cb05tucl_ae5_aq_ssa_L2_OD_REC_CAB_2008001-2008060
- aod/EXTvPM25.CD24_effectSeaSalt.v5.base_cb05tucl_ae5_aq_ssa_L2_LWC_LEI_2008183-2008243
- aod/EXTvPM25.CD24_effectSeaSalt.v5.base_cb05tucl_ae5_aq_ssa_L2_OD_REC_PAL_2008183-2008243
- aod/EXTvPM25.CD24_effectSeaSalt.v5.base_cb05tucl_ae5_aq_ssa_L2_LWC_DUN_2008001-2008060
- aod/EXTvPM25.CD24_effectSeaSalt.v5.base_cb05tucl_ae5_aq_ssa_L2_LWC_DUN_2008183-2008243
- aod/EXTvPM25.CD24_effectSeaSalt.v5.base_cb05tucl_ae5_aq_ssa_L2_OD_REC_CAB_2008183-2008243
- aod/EXTvPM25.CD24_effectSeaSalt.v5.base_cb05tucl_ae5_aq_ssa_L2_OD_REC_KUO_2008183-2008243
- aod/EXTvPM25.CD24_effectSeaSalt.v5.base_cb05tucl_ae5_aq_ssa_L2_LWC_HLS_2008183-2008243
- aod/EXTvPM25.CD24_effectSeaSalt.v5.base_cb05tucl_ae5_aq_ssa_L2_OD_REC_HLL_2008183-2008243
- aod/EXTvPM25.CD24_effectSeaSalt.v5.base_cb05tucl_ae5_aq_ssa_L2_LWC_BRU_2008001-2008060
- aod/EXTvPM25.CD24_effectSeaSalt.v5.base_cb05tucl_ae5_aq_ssa_L2_LWC_LEI_2008001-2008060
- aod/EXTvPM25.CD24_effectSeaSalt.v5.base_cb05tucl_ae5_aq_ssa_L2_OD_REC_HGL_2008001-2008060
- aod/EXTvPM25.CD24_effectSeaSalt.v5.base_cb05tucl_ae5_aq_ssa_L2_LWC_OOS_2008183-2008243
- aod/EXTvPM25.CD24_effectSeaSalt.v5.base_cb05tucl_ae5_aq_ssa_L2_LWC_HHG_2008001-2008060
- aod/EXTvPM25.CD24_effectSeaSalt.v5.base_cb05tucl_ae5_aq_ssa_L2_LWC_MIN_2008183-2008243
- aod/EXTvPM25.CD24_effectSeaSalt.v5.base_cb05tucl_ae5_aq_ssa_L2_OD_REC_OOS_2008183-2008243
- aod/EXTvPM25.CD24_effectSeaSalt.v5.base_cb05tucl_ae5_aq_ssa_L2_LWC_GDA_2008183-2008243
- aod/EXTvPM25.CD24_effectSeaSalt.v5.base_cb05tucl_ae5_aq_ssa_L2_OD_REC_LIL_2008183-2008243
- aod/EXTvPM25.CD24_effectSeaSalt.v5.base_cb05tucl_ae5_aq_ssa_L2_OD_REC_LEI_2008001-2008060
- aod/EXTvPM25.CD24_effectSeaSalt.v5.base_cb05tucl_ae5_aq_ssa_L2_OD_REC_HLL_2008001-2008060
- aod/EXTvPM25.CD24_effectSeaSalt.v5.base_cb05tucl_ae5_aq_ssa_L2_LWC_MAI_2008001-2008060
- aod/EXTvPM25.CD24_effectSeaSalt.v5.base_cb05tucl_ae5_aq_ssa_L2_LWC_BEL_2008183-2008243
- aod/EXTvPM25.CD24_effectSeaSalt.v5.base_cb05tucl_ae5_aq_ssa_L2_LWC_HYY_2008183-2008243
- aod/EXTvPM25.CD24_effectSeaSalt.v5.base_cb05tucl_ae5_aq_ssa_L2_LWC_BRU_2008183-2008243
- aod/EXTvPM25.CD24_effectSeaSalt.v5.base_cb05tucl_ae5_aq_ssa_L2_OD_REC_GDA_2008183-2008243
- aod/EXTvPM25.CD24_effectSeaSalt.v5.base_cb05tucl_ae5_aq_ssa_L2_LWC_KUO_2008001-2008060
- aod/EXTvPM25.CD24_effectSeaSalt.v5.base_cb05tucl_ae5_aq_ssa_L2_OD_REC_HLS_2008183-2008243
- aod/EXTvPM25.CD24_effectSeaSalt.v5.base_cb05tucl_ae5_aq_ssa_L2_LWC_TOR_2008183-2008243
- aod/EXTvPM25.CD24_effectSeaSalt.v5.base_cb05tucl_ae5_aq_ssa_L2_OD_REC_GDA_2008001-2008060
- aod/EXTvPM25.CD24_effectSeaSalt.v5.base_cb05tucl_ae5_aq_ssa_L2_LWC_PAL_2008183-2008243
- aod/EXTvPM25.CD24_effectSeaSalt.v5.base_cb05tucl_ae5_aq_ssa_L2_LWC_MIN_2008001-2008060
- aod/EXTvPM25.CD24_effectSeaSalt.v5.base_cb05tucl_ae5_aq_ssa_L2_LWC_BEL_2008001-2008060
- aod/EXTvPM25.CD24_effectSeaSalt.v5.base_cb05tucl_ae5_aq_ssa_L2_LWC_MAI_2008183-2008243
- aod/EXTvPM25.CD24_effectSeaSalt.v5.base_cb05tucl_ae5_aq_ssa_L2_OD_REC_MIN_2008001-2008060
- aod/EXTvPM25.CD24_effectSeaSalt.v5.base_cb05tucl_ae5_aq_ssa_L2_OD_REC_DUN_2008183-2008243
- aod/EXTvPM25.CD24_effectSeaSalt.v5.base_cb05tucl_ae5_aq_ssa_L2_OD_REC_PAL_2008001-2008060
- aod/EXTvPM25.CD24_effectSeaSalt.v5.base_cb05tucl_ae5_aq_ssa_L2_LWC_TOR_2008001-2008060
- aod/EXTvPM25.CD24_effectSeaSalt.v5.base_cb05tucl_ae5_aq_ssa_L2_LWC_HLL_2008183-2008243
- aod/EXTvPM25.CD24_effectSeaSalt.v5.base_cb05tucl_ae5_aq_ssa_L2_LWC_HLS_2008001-2008060
- aod/EXTvPM25.CD24_effectSeaSalt.v5.base_cb05tucl_ae5_aq_ssa_L2_LWC_CAB_2008183-2008243
- aod/EXTvPM25.CD24_effectSeaSalt.v5.base_cb05tucl_ae5_aq_ssa_L2_LWC_HYY_2008001-2008060
- aod/EXTvPM25.CD24_effectSeaSalt.v5.base_cb05tucl_ae5_aq_ssa_L2_OD_REC_HHG_2008183-2008243
- aod/EXTvPM25.CD24_effectSeaSalt.v5.base_cb05tucl_ae5_aq_ssa_L2_LWC_LIL_2008001-2008060
- aod/EXTvPM25.CD24_effectSeaSalt.v5.base_cb05tucl_ae5_aq_ssa_L2_LWC_PAL_2008001-2008060
- aod/EXTvPM25.CD24_effectSeaSalt.v5.base_cb05tucl_ae5_aq_ssa_L2_OD_REC_MAI_2008001-2008060
