# Supplementary material for: A comparison of sea salt emission parameterizations in northwestern Europe using a chemistry transport model setup
Source: Copernicus journal article supplement (doi:10.5194/acp-16-9905-2016), 2016-08-08
Supplement: Supplementary file 2 [file acp-16-9905-2016-supplement.zip › aod/README]

The stations names are abbreviated by three letters each. The mapping is as follows:

'Cabauw' = 'CAB'
'Gustav_Dalen_Tower' = 'GDA'
'Helgoland' = 'HGL'
'Helsinki' = 'HLS'
'Helsinki_Lighthouse' = 'HLL'
'Hyytiala' = 'HYY'
'Kuopio' = 'KUO'
'Palgrunden' = 'PAL'
'Toravere' = 'TOR'
'Brussels' = 'BRU'
'Belsk' = 'BEL'
'Dunkerque' = 'DUN'
'Hamburg' = 'HHG'
'Leipzig' = 'LEI'
'Lille' = 'LIL'
'Mainz' = 'MAI'
'Minsk' = 'MIN'
'Oostende' = 'OOS'
