# Supplementary material for: A comparison of sea salt emission parameterizations in northwestern Europe using a chemistry transport model setup
Source: Copernicus journal article supplement (doi:10.5194/acp-16-9905-2016), 2016-08-08
Supplement: Supplementary file 2 [file acp-16-9905-2016-supplement.zip › cmaq/GRIDDESC]

' '
'LAM_EUROPE2'
  2        30.000        60.000        10.000        10.000        55.000
' '
'CD72'
'LAM_EUROPE2'  -1926000.000  -2655000.000     72000.000     72000.000  57  66   1
'CD24'
'LAM_EUROPE2'  -1398000.000  -1191000.000     24000.000     24000.000 112 106   1
'CD06'
'LAM_EUROPE2'   -672000.000   -537000.000      6000.000      6000.000 160 157   1
'AQ24'
'LAM_EUROPE2'  -1926000.000  -2655000.000     24000.000     24000.000 171 198   1
' '
