# Supplementary material for: A comparison of sea salt emission parameterizations in northwestern Europe using a chemistry transport model setup
Source: Copernicus journal article supplement (doi:10.5194/acp-16-9905-2016), 2016-08-08
Supplement: Supplementary file 2 [file acp-16-9905-2016-supplement.zip › conc/conc.timeseries.values.sum2008.base.Na.DE0001R.csv]

doy	hour	pm2.5	pm10
2008183	0	0.166125522712805	1.55683792041888
2008183	1	0.164902627972835	1.47414508910221
2008183	2	0.163351051779186	1.39512008227844
2008183	3	0.159052315170248	1.30893065141554
2008183	4	0.152048755913355	1.20161732326753
2008183	5	0.138588770442403	1.05806300943673
2008183	6	0.121461868561469	0.906193642981673
2008183	7	0.109274269767551	0.796439165451775
2008183	8	0.102942022256243	0.736186536982621
2008183	9	0.0987419186496907	0.700710923285941
2008183	10	0.0948458753930208	0.698283341865768
2008183	11	0.0965795569668792	0.771176509861568
2008183	12	0.102339356347891	0.900050864217703
2008183	13	0.114047625553767	1.03059041749462
2008183	14	0.125454718059985	1.06152958788173
2008183	15	0.114742390786686	0.898892936011024
2008183	16	0.102231619280966	0.809922405992375
2008183	17	0.105469976298641	0.929714206849306
2008183	18	0.115154882830261	1.07807007706207
2008183	19	0.113195414340371	1.05179724904524
2008183	20	0.113057871767412	0.992378056526172
2008183	21	0.121474082005946	0.974048139156539
2008183	22	0.139319239785218	1.11707537017488
2008183	23	0.137086420014708	1.22157664098477
2008184	0	0.133133649448704	1.25597724584268
2008184	1	0.124857837851975	1.16674861048129
2008184	2	0.116603098950435	1.0807608034588
2008184	3	0.0903524821298624	0.933472584448315
2008184	4	0.0778585276948672	0.906860316517212
2008184	5	0.0744542317041468	0.887122432019779
2008184	6	0.067038236576735	0.782419051882844
2008184	7	0.0621324110867117	0.695495458998559
2008184	8	0.0663624144134726	0.673816744785233
2008184	9	0.0610211093475593	0.541473563720729
2008184	10	0.0450845959956997	0.358292800355005
2008184	11	0.0382823067001479	0.29811070417254
2008184	12	0.0372058388968523	0.304196950219892
2008184	13	0.0381226556443877	0.333584113000844
2008184	14	0.0408137442906423	0.373961505355216
2008184	15	0.0430947701993579	0.398176966099387
2008184	16	0.0489016421855142	0.458464166964862
2008184	17	0.0665259340253627	0.571060585494526
2008184	18	0.0789236610678507	0.614470745993704
2008184	19	0.0898946157274971	0.668745164358322
2008184	20	0.100712594695104	0.748542624057668
2008184	21	0.102454831164415	0.783937719565401
2008184	22	0.102819860550977	0.789982446230429
2008184	23	0.101434797617153	0.775216630412925
2008185	0	0.0945654016218196	0.735099401838215
2008185	1	0.0936190579858627	0.721181002408184
2008185	2	0.0982542199360928	0.753407230723613
2008185	3	0.101436071056889	0.790910619351824
2008185	4	0.100055337591387	0.804499434060117
2008185	5	0.0983791406409225	0.795548066512698
2008185	6	0.0853217535247807	0.693507423977081
2008185	7	0.0846923531865562	0.703290446954794
2008185	8	0.0841177919969707	0.690620194620409
2008185	9	0.0800923754894795	0.669737535478418
2008185	10	0.0801204448737816	0.706523199236656
2008185	11	0.0793484888865499	0.716820275726919
2008185	12	0.0816131538050736	0.755676041846961
2008185	13	0.0882260762249123	0.819594845813528
2008185	14	0.0999332756247456	0.908729553681575
2008185	15	0.0954309783985519	0.860193856579845
2008185	16	0.0862971831872487	0.839336537872977
2008185	17	0.0858098483955359	0.875700914038779
2008185	18	0.0855816844195312	0.905090303779501
2008185	19	0.0868864193243622	0.943670809440897
2008185	20	0.0829153441721403	0.904501915795331
2008185	21	0.0700726151199255	0.739618497796423
2008185	22	0.0640108247201475	0.62097606679261
2008185	23	0.0693240285488201	0.636364387888769
2008186	0	0.0828197138633186	0.773236206033496
2008186	1	0.0908974164816847	0.883574244941726
2008186	2	0.0943650713916386	0.936443994703286
2008186	3	0.0910046865884716	0.950730222378452
2008186	4	0.085038125418296	0.940849107480683
2008186	5	0.0775784199422838	0.924918981992267
2008186	6	0.0737124477604192	0.87347470538629
2008186	7	0.0727712330371106	0.815436400782134
2008186	8	0.0719186417485624	0.751968622739817
2008186	9	0.0675494664597778	0.671723995871257
2008186	10	0.0627570730277951	0.593959489759031
2008186	11	0.0601946048736659	0.5420884671394
2008186	12	0.0558374939045201	0.469300812423232
2008186	13	0.048357571390526	0.38932877256825
2008186	14	0.0419679569315089	0.331455328387497
2008186	15	0.0401071996141987	0.31279591737539
2008186	16	0.0391343110441708	0.308507423178612
2008186	17	0.0361325982776309	0.301973620805935
2008186	18	0.0340152215783195	0.317507616366016
2008186	19	0.0329052770409094	0.349936383737099
2008186	20	0.0350895391100227	0.429573009849876
2008186	21	0.0395427586454246	0.536732812636184
2008186	22	0.0391477113322913	0.560773214142282
2008186	23	0.0343173148962806	0.49449769464893
2008187	0	0.0337561831002367	0.492949183392283
2008187	1	0.0367312724247614	0.529690651146832
2008187	2	0.0382335269853209	0.556878255842928
2008187	3	0.047476622179047	0.718550431712631
2008187	4	0.0570833531190442	0.887569412488423
2008187	5	0.0566869840992161	0.859329426830031
2008187	6	0.0497262202194481	0.740569533614781
2008187	7	0.0583061864571352	0.849517035037071
2008187	8	0.071304603413391	0.981749959754061
2008187	9	0.0706913869652046	0.989997166720431
2008187	10	0.0777075872106923	1.15186403919016
2008187	11	0.0760795486038171	1.17118322114811
2008187	12	0.0674059082174961	0.969604439096611
2008187	13	0.0561779461341285	0.689190434478869
2008187	14	0.0387948372359345	0.442029968532758
2008187	15	0.0330026757820748	0.382779986374661
2008187	16	0.0384305547551513	0.454078798418011
2008187	17	0.0397108681552103	0.448262999112739
2008187	18	0.0338260061731441	0.358627443284655
2008187	19	0.0307844809499635	0.326952312962068
2008187	20	0.03196883059048	0.365996623478088
2008187	21	0.0404369973289124	0.488091547018648
2008187	22	0.0443518428643562	0.543646970533286
2008187	23	0.039565671266522	0.540980606612884
2008188	0	0.0481121482436771	0.778322408587781
2008188	1	0.064805915161445	1.18497784070329
2008188	2	0.0788490496633724	1.54377290784736
2008188	3	0.100674880304984	2.09905021039855
2008188	4	0.105977790735148	2.17338964840894
2008188	5	0.0763714198414221	1.40210974508292
2008188	6	0.0380209656689555	0.534366256974942
2008188	7	0.0278524884182133	0.302757250812146
2008188	8	0.0322574636386381	0.297828126989684
2008188	9	0.0625413532976333	0.535898423007533
2008188	10	0.114810400740028	1.07843841205502
2008188	11	0.183920372508428	1.81962360758664
2008188	12	0.241737987146263	2.21448157317698
2008188	13	0.258914519441338	2.19694101107929
2008188	14	0.262544438513016	2.11579840970448
2008188	15	0.23328897030297	1.80523376534743
2008188	16	0.158917013136336	1.2221009396383
2008188	17	0.119128385845317	0.805330843222248
2008188	18	0.116477447334319	0.706238409353547
2008188	19	0.116413098036522	0.683207739170766
2008188	20	0.107517560211552	0.625872669693409
2008188	21	0.100561384304173	0.581647985288359
2008188	22	0.10340686558674	0.597318840306778
2008188	23	0.108984935252497	0.667767960645562
2008189	0	0.109152709307914	0.700184542448502
2008189	1	0.103229414013724	0.655373633095483
2008189	2	0.102857758522041	0.636144231760434
2008189	3	0.101738711740771	0.679600045988677
2008189	4	0.103943308669976	0.820091507244272
2008189	5	0.102554296423198	0.912412425197703
2008189	6	0.0779389119218818	0.765647902262448
2008189	7	0.078345259517132	0.799257524916612
2008189	8	0.0978576284476417	1.09009241533289
2008189	9	0.119575675534491	1.33313718041391
2008189	10	0.127111030053024	1.35349632254724
2008189	11	0.121723149158038	1.20316620207586
2008189	12	0.128406978928735	1.1857983603653
2008189	13	0.142626382687128	1.17645317229932
2008189	14	0.14308261936185	1.13420937464863
2008189	15	0.126943743400226	1.05021205333115
2008189	16	0.109674437021807	0.955478074226206
2008189	17	0.094762067149113	0.896597742644177
2008189	18	0.0849701630395121	0.839478552302294
2008189	19	0.0725653114127523	0.873537814730465
2008189	20	0.0611846443091469	1.07742887539912
2008189	21	0.0494676338277561	1.0654264371076
2008189	22	0.05596871739232	1.06627766027413
2008189	23	0.109533233603212	1.68895342513828
2008190	0	0.10255725359173	1.80375129033659
2008190	1	0.0445470666598748	1.25409044897337
2008190	2	0.0268032242172221	0.907977816627071
2008190	3	0.032468476362313	1.12519868970672
2008190	4	0.051339284867975	1.58846062904362
2008190	5	0.0899469084285918	2.14311977728315
2008190	6	0.144332139890878	3.19398180667078
2008190	7	0.194058217901754	3.65746328413161
2008190	8	0.256367099427132	4.11592627776141
2008190	9	0.273396009592194	4.08966394073834
2008190	10	0.249610240367441	3.53047781091932
2008190	11	0.190338060682465	2.51231475310123
2008190	12	0.129930702630412	1.53380852987324
2008190	13	0.108557909244243	1.25243495296189
2008190	14	0.097531154318814	1.19981821415039
2008190	15	0.0905313321476628	1.19614921525278
2008190	16	0.124393337779455	1.84534682212751
2008190	17	0.190610376211501	2.70716184639396
2008190	18	0.211659634049513	2.93395245011967
2008190	19	0.214288483913293	3.14786563060423
2008190	20	0.169973131536445	3.10703868171094
2008190	21	0.123019664855871	2.77128453163534
2008190	22	0.107098791170809	2.3818186400866
2008190	23	0.108090702932713	2.07726060645228
2008191	0	0.126781897135702	2.00435811132124
2008191	1	0.136464941891855	1.96818408397022
2008191	2	0.118277187052858	1.79067595017879
2008191	3	0.0948142953202873	1.57614943930477
2008191	4	0.103592315046105	1.78032895398212
2008191	5	0.146497762720043	2.46823487268374
2008191	6	0.155270286030736	2.53589504443082
2008191	7	0.127291743089578	2.00652814912643
2008191	8	0.0936705679526889	1.46787890231176
2008191	9	0.0803811951427869	1.24053851456713
2008191	10	0.0790743751505838	1.19337164089421
2008191	11	0.0852008064045201	1.21575720295801
2008191	12	0.088494829480389	1.21616612062874
2008191	13	0.0873056959445237	1.18644128551576
2008191	14	0.0836969635567024	1.12135376588788
2008191	15	0.0783923462721384	1.01129141067292
2008191	16	0.0693838074213566	0.872146624031688
2008191	17	0.063137953795644	0.767165901596372
2008191	18	0.0636615389894963	0.731232491851505
2008191	19	0.0672912492858421	0.721167256163029
2008191	20	0.0721860574154539	0.755611176338583
2008191	21	0.0771660320583808	0.808612016198416
2008191	22	0.0791584106111312	0.840021334726705
2008191	23	0.0759810687400688	0.838354001687786
2008192	0	0.0641071668567351	0.796730831352601
2008192	1	0.0570887455979883	0.807576318025764
2008192	2	0.0659401996042719	0.993562740994144
2008192	3	0.0885178970152029	1.23961222216248
2008192	4	0.0538642787244303	0.965698221297985
2008192	5	0.00366428995663129	0.107603479310264
2008192	6	0.00720017922737537	0.235606630992653
2008192	7	0.0108461103311971	0.290661517381004
2008192	8	0.041024943881177	0.893073344608142
2008192	9	0.0702806619769053	1.41401959336834
2008192	10	0.06144323340073	1.25700841684291
2008192	11	0.0691132208709469	1.34926503650099
2008192	12	0.0770269250166705	1.4429153199713
2008192	13	0.0711765877701561	1.49974672445409
2008192	14	0.0695394274038128	1.48946582738181
2008192	15	0.0646881265992485	1.22882975389773
2008192	16	0.0534524262592502	1.00373470459421
2008192	17	0.059425122586629	1.00110358829573
2008192	18	0.0702030776758165	1.15985983275571
2008192	19	0.0864698056999666	1.438980568392
2008192	20	0.100998795330983	1.7028282263673
2008192	21	0.114398310876222	1.92880408083329
2008192	22	0.118032807264733	2.05574138233926
2008192	23	0.121319141323563	2.08299603387881
2008193	0	0.123428959083485	2.05451000362974
2008193	1	0.123874860267558	2.05691529561256
2008193	2	0.120555129297789	2.07553720715432
2008193	3	0.107633996976568	2.04458477575663
2008193	4	0.10087988108132	1.98632034307185
2008193	5	0.10906071989058	2.19995808967989
2008193	6	0.112123230438546	2.37884370714697
2008193	7	0.111044483790596	2.41850456927546
2008193	8	0.112206071464895	2.45025223119589
2008193	9	0.123933381836808	2.70343742705906
2008193	10	0.120514039874385	2.65362515710265
2008193	11	0.112851371310284	2.35830362741924
2008193	12	0.110632490705252	2.17007953366615
2008193	13	0.136177646412524	2.44569682403277
2008193	14	0.169480062483578	3.00336117508151
2008193	15	0.177093607799145	3.06579039973027
2008193	16	0.17094852454454	2.75424566246512
2008193	17	0.174577797575887	2.71293815148388
2008193	18	0.163178382967973	2.50513514736411
2008193	19	0.143912551178366	2.26913898083041
2008193	20	0.132771964446885	2.05616449722442
2008193	21	0.10783935876304	1.61028663619019
2008193	22	0.114240087280514	1.64953311497966
2008193	23	0.150836369597202	2.14502184274948
2008194	0	0.173293944037756	2.51398716917441
2008194	1	0.17202453074256	2.59330410404422
2008194	2	0.169011366470325	2.74448162427679
2008194	3	0.170101224215267	2.86128164031496
2008194	4	0.156271078427068	2.42719440746845
2008194	5	0.123547499028956	1.72167129702453
2008194	6	0.0993112126513411	1.33681538226323
2008194	7	0.0992500489133262	1.59561248582602
2008194	8	0.110677238086787	1.99906670998686
2008194	9	0.114190512319391	2.71527339483888
2008194	10	0.0881225018724391	2.900518472995
2008194	11	0.0973789869716764	3.0797277597828
2008194	12	0.119334606435326	3.32765915766283
2008194	13	0.180436183896349	4.04039914811597
2008194	14	0.225623031420486	4.18022210998804
2008194	15	0.274690398754856	4.61683903230062
2008194	16	0.300277490177167	4.90141181986325
2008194	17	0.279964197916505	4.5803827912386
2008194	18	0.262094806199426	4.32364601147869
2008194	19	0.257404556179458	4.15989016284684
2008194	20	0.237233065135643	3.87217402665076
2008194	21	0.210659485303767	3.3258297000055
2008194	22	0.14227495334101	2.15100574011486
2008194	23	0.116212645430127	1.78717360532089
2008195	0	0.112699957545039	1.80149125530088
2008195	1	0.102813146051002	1.71746343419768
2008195	2	0.121384828186829	1.95306035752498
2008195	3	0.142665446384355	2.26646691748421
2008195	4	0.157748964265664	2.54935621360781
2008195	5	0.167509097068907	2.81247186031976
2008195	6	0.17954716208636	3.10685116535899
2008195	7	0.190591610895152	3.28249658782008
2008195	8	0.196802874099986	3.34529791130142
2008195	9	0.200337885781182	3.32950221499952
2008195	10	0.209756258000557	3.3760905936194
2008195	11	0.214445451874775	3.34894739218054
2008195	12	0.182312858267909	2.92570359829635
2008195	13	0.114339385551055	2.06702955050772
2008195	14	0.0508171204891858	1.14002307103256
2008195	15	0.040022484882461	0.795935564831809
2008195	16	0.088299850863175	1.48083770889758
2008195	17	0.115324233741465	1.90240663372493
2008195	18	0.124041408929729	1.93955322793795
2008195	19	0.115879446657243	1.73817601068016
2008195	20	0.0991795808628934	1.41360632656619
2008195	21	0.0834877016644686	1.11597362223153
2008195	22	0.0721948139260978	0.944021862189298
2008195	23	0.0651651038649444	0.842724180657046
2008196	0	0.0619305779521654	0.764668906044895
2008196	1	0.0589414062528158	0.705382639261065
2008196	2	0.0575540786368013	0.684313072090631
2008196	3	0.0582250193267182	0.708861176703554
2008196	4	0.0666713347486513	0.770075802667888
2008196	5	0.0749107517169223	0.828342082080756
2008196	6	0.0732485507451117	0.835342053253334
2008196	7	0.0709384227013781	0.85063265111142
2008196	8	0.0746014880683016	0.947458136554666
2008196	9	0.0872612816482631	1.10748004057259
2008196	10	0.0886435250449205	1.19650130197362
2008196	11	0.0863227839992558	1.25178408947649
2008196	12	0.0829224703781611	1.3058888502982
2008196	13	0.0981561739309016	1.49342523822821
2008196	14	0.11766721378615	1.622031363243
2008196	15	0.120027067057336	1.64587306687273
2008196	16	0.13024947134483	2.02904158699623
2008196	17	0.178576676802458	2.7600780050187
2008196	18	0.219884951176449	2.86961923661719
2008196	19	0.199894102548622	2.20965763082061
2008196	20	0.176665380297683	1.92599843698722
2008196	21	0.185570125744357	2.11179404899079
2008196	22	0.189530531242039	2.16546347733757
2008196	23	0.200786902895761	2.2035439687391
2008197	0	0.210458166922653	2.23443612364552
2008197	1	0.185722003762573	1.97235052237728
2008197	2	0.139748784323247	1.40881504857436
2008197	3	0.119831691725105	1.11644813272165
2008197	4	0.108629384872864	0.997627364999616
2008197	5	0.106358074282586	1.00217619622304
2008197	6	0.110769245904693	1.15308911888138
2008197	7	0.115563431935215	1.36101605105234
2008197	8	0.117025831074554	1.57816162744338
2008197	9	0.106173400920001	1.71764280747358
2008197	10	0.104313415093264	1.8188862448066
2008197	11	0.114010776792772	2.15591719590651
2008197	12	0.137151642838281	2.57740447482695
2008197	13	0.143657893788	2.71346499025246
2008197	14	0.133505337146574	2.58049130347355
2008197	15	0.134727555629099	2.31645140476327
2008197	16	0.126357599697188	2.22942158817445
2008197	17	0.0668680388676606	1.24448118090563
2008197	18	0.0596219674377648	1.15816265747278
2008197	19	0.0589239345589298	1.29291264803418
2008197	20	0.0510081703941355	1.1546919522371
2008197	21	0.0509297201962236	1.15654048800197
2008197	22	0.0518283526648084	1.22632417324278
2008197	23	0.0228006761421524	0.569698232415759
2008198	0	0.0363076398619098	0.765224062828094
2008198	1	0.0604424563650512	1.20176882457514
2008198	2	0.0745803575044945	1.52963014419277
2008198	3	0.0993865788729306	1.90286058968961
2008198	4	0.151120051332137	2.56549977926737
2008198	5	0.201453173753852	3.09705861635866
2008198	6	0.211286034138749	3.06592440208276
2008198	7	0.217511777044046	3.03604179100934
2008198	8	0.253413791212381	3.51958108430396
2008198	9	0.317664903382934	4.44924587795018
2008198	10	0.367950310706295	4.99794528115851
2008198	11	0.409840394558008	5.26263309082727
2008198	12	0.431025241762116	5.48167945079078
2008198	13	0.380536773420244	5.09555659107032
2008198	14	0.238295076769756	3.48636903609423
2008198	15	0.13400178682469	2.1425997673134
2008198	16	0.102711026608575	1.87261007583047
2008198	17	0.103424029376888	1.71375711460895
2008198	18	0.146676577951007	2.01731913515186
2008198	19	0.197558122098505	2.61333990211964
2008198	20	0.201975692179288	2.60182756226765
2008198	21	0.183573491993253	2.31952969950048
2008198	22	0.157280069387319	1.96993312235582
2008198	23	0.143545309690899	1.78899465290653
2008199	0	0.143797960682543	1.75827637241934
2008199	1	0.1876592613586	2.09107875297328
2008199	2	0.258385024938647	2.63429999833832
2008199	3	0.280444230490038	2.76630457980489
2008199	4	0.279046433962701	2.73937742176141
2008199	5	0.261125751483523	2.51920593315778
2008199	6	0.223099898991329	2.0916858493746
2008199	7	0.187877772321882	1.76170636297082
2008199	8	0.174384025065388	1.62060207129603
2008199	9	0.177830651936693	1.53310208389861
2008199	10	0.180514104839408	1.44363223996975
2008199	11	0.175477982894054	1.31450217384874
2008199	12	0.174689082141923	1.27693167198253
2008199	13	0.170262721546415	1.25615813386537
2008199	14	0.16121653855608	1.21522227171648
2008199	15	0.116576268963758	1.00373204500686
2008199	16	0.0515500685902987	0.638050899988317
2008199	17	0.0226364732623876	0.388531082078685
2008199	18	0.0194329000365256	0.337988511217296
2008199	19	0.0286724444549854	0.457611857101779
2008199	20	0.0782708706752749	1.06910567527794
2008199	21	0.10439782229235	1.46572194885445
2008199	22	0.100844365015073	1.59281598955288
2008199	23	0.0946857513118843	1.5997312167757
2008200	0	0.08535873601578	1.47179595370312
2008200	1	0.0727115450285561	1.55270711680524
2008200	2	0.0541594693746326	1.33591652191885
2008200	3	0.0601934222261518	1.44128573068082
2008200	4	0.04370434820309	1.12374218702969
2008200	5	0.03497131734106	0.903067979306451
2008200	6	0.02439994639649	0.748404132460898
2008200	7	0.0194134667772955	0.625842098876645
2008200	8	0.0183462568593695	0.503257228517903
2008200	9	0.0178125965139488	0.38673741504501
2008200	10	0.0186893806341722	0.319771338780742
2008200	11	0.0196551250758473	0.293218617544664
2008200	12	0.020459362147447	0.285307795910758
2008200	13	0.0230620450990337	0.289868764108074
2008200	14	0.0267333091739551	0.304889850577136
2008200	15	0.0291643759733802	0.31160370284152
2008200	16	0.0302418223307165	0.30102889501586
2008200	17	0.0314527672680888	0.289325489544063
2008200	18	0.0323479713704138	0.27992852162434
2008200	19	0.0329861049196247	0.276100513307036
2008200	20	0.0331234424265158	0.272961033762601
2008200	21	0.0322405427645645	0.267446289272167
2008200	22	0.0309223416579714	0.283515241345303
2008200	23	0.0315113193568974	0.35016444543651
2008201	0	0.036380116887106	0.491599794940375
2008201	1	0.0437350727331347	0.674042620474531
2008201	2	0.0448735932839945	0.753562356692064
2008201	3	0.0375382204421373	0.70088880903913
2008201	4	0.0268159385768428	0.510654317090314
2008201	5	0.0198562930458318	0.40156464932846
2008201	6	0.0122402051232067	0.28089507749018
2008201	7	0.0180732714225996	0.408227293435371
2008201	8	0.0333655672780847	0.75609431057587
2008201	9	0.0431875144054262	1.00801320611566
2008201	10	0.0534810229814654	1.21281655636168
2008201	11	0.0594801430536412	1.40181883725303
2008201	12	0.046822864097553	1.23007767289389
2008201	13	0.0442263415283487	1.22239854208049
2008201	14	0.0502271088858214	1.49514776080179
2008201	15	0.0526461857507167	1.55863196607497
2008201	16	0.0648898779050761	1.7104376760227
2008201	17	0.0835180017173148	1.85623103784726
2008201	18	0.0837648611228164	1.84941192868031
2008201	19	0.0851779870190846	1.72378127933493
2008201	20	0.114258396353114	2.26180061555786
2008201	21	0.147954217347043	3.06161043437479
2008201	22	0.155287783310204	3.33010958704681
2008201	23	0.137234178060031	3.1877736280331
2008202	0	0.104775783500791	2.46495150887514
2008202	1	0.07218317412591	1.58985717723352
2008202	2	0.036402839952833	0.88576543387352
2008202	3	0.0477735022082557	1.22396410890091
2008202	4	0.344613339432888	7.43520814317264
2008202	5	0.417780765523251	9.34061900511089
2008202	6	0.355923004995616	8.48115414924004
2008202	7	0.314511146471972	8.0816383611833
2008202	8	0.278070534342908	7.86587106879581
2008202	9	0.263491463022097	7.94549871679016
2008202	10	0.242835775701595	7.67403833573754
2008202	11	0.213912646912499	6.57546835364626
2008202	12	0.126746252881556	3.93244974941693
2008202	13	0.0345046796200206	1.08176066369408
2008202	14	0.0334397571222959	0.832837935130293
2008202	15	0.0987505104588014	1.90521202702611
2008202	16	0.113010541808775	2.08247515921679
2008202	17	0.10865483929759	1.93351685825125
2008202	18	0.103114406964653	1.78018056773234
2008202	19	0.0971310766577938	1.59706334359006
2008202	20	0.093141526073549	1.47885497095247
2008202	21	0.0924077029135995	1.49551071284842
2008202	22	0.0902327786491229	1.58460762423233
2008202	23	0.0927366249189846	1.59861178570402
2008203	0	0.0656500228204547	1.14643835265602
2008203	1	0.0513183141101775	0.880655948035112
2008203	2	0.0695464590392865	1.09866361417458
2008203	3	0.0942717547344199	1.50537230497704
2008203	4	0.0953549103096668	1.6121070292656
2008203	5	0.0727740762889491	1.36140158566193
2008203	6	0.0529230827363614	1.0403583590307
2008203	7	0.0477501937601136	1.08484567367268
2008203	8	0.0450826480998925	1.19795727918538
2008203	9	0.0529148369456806	1.32707900640873
2008203	10	0.0576975870711405	1.34839420458737
2008203	11	0.0561536243425976	1.23698320718209
2008203	12	0.0549460942007948	1.12230274978476
2008203	13	0.0634121614091037	1.10447499820562
2008203	14	0.0715843148833996	1.03406536509537
2008203	15	0.0710145491680573	0.907184846789976
2008203	16	0.0654453141853733	0.769135936021284
2008203	17	0.0642170999469307	0.719855132835215
2008203	18	0.065285863800818	0.71124805089303
2008203	19	0.0701000829682943	0.700255817983357
2008203	20	0.0762103947577331	0.72880109472551
2008203	21	0.0749820753120532	0.796959421893642
2008203	22	0.0646478081544187	0.89604457928034
2008203	23	0.0545599919341208	0.935200418719765
2008204	0	0.0662216492056372	1.12339256920552
2008204	1	0.114776359800408	1.66917971513793
2008204	2	0.226561131065717	3.01703969255156
2008204	3	0.35944025337548	4.98149970668914
2008204	4	0.374319660119148	5.10814927187731
2008204	5	0.374092606179384	5.04266868048789
2008204	6	0.359956141733437	4.86797634914863
2008204	7	0.329097749786837	4.58184858585529
2008204	8	0.29098564364523	4.35332129209045
2008204	9	0.250908014463076	4.07100761359495
2008204	10	0.222545184234273	3.8452419162649
2008204	11	0.210029998471078	3.64055064979113
2008204	12	0.192082149001585	3.32513041868487
2008204	13	0.166442960736779	2.77821325728733
2008204	14	0.14098150404106	2.09416248362
2008204	15	0.119340715817517	1.61149943209184
2008204	16	0.113159765891567	1.45223824785106
2008204	17	0.139222698956496	1.63285973255431
2008204	18	0.178031111209268	1.99568058156903
2008204	19	0.175749239982312	1.94689546100234
2008204	20	0.145942983117885	1.66345950242358
2008204	21	0.115976103217634	1.33818701891005
2008204	22	0.109118348224584	1.22458334026159
2008204	23	0.111262437922791	1.24178453463493
2008205	0	0.116359430846048	1.28907347035799
2008205	1	0.118293473429935	1.30968004001379
2008205	2	0.120719698117851	1.35728711670344
2008205	3	0.149951900706092	1.60727225382393
2008205	4	0.300242389617652	2.37923127392944
2008205	5	0.520219779740493	3.4591431968735
2008205	6	0.559126038036384	3.69610808996572
2008205	7	0.549338530034753	3.51682374650423
2008205	8	0.47070674583297	3.20351938009037
2008205	9	0.386394348603189	2.7929798122143
2008205	10	0.349785359800156	2.53891398372011
2008205	11	0.329195646786824	2.33698078362178
2008205	12	0.31410640328821	2.19291125033187
2008205	13	0.30219334761147	2.09885359553276
2008205	14	0.29263195338688	2.03266609523419
2008205	15	0.281694931596299	1.98718106247508
2008205	16	0.274016471959146	1.96940713090874
2008205	17	0.270306702384984	1.96702994962639
2008205	18	0.269365930186912	1.96143548303207
2008205	19	0.266699610651239	1.94892612209782
2008205	20	0.267923102881615	1.94033559883459
2008205	21	0.267953926704402	1.93730783956066
2008205	22	0.269271259043126	1.94655586966245
2008205	23	0.270628583486818	1.97119477622624
2008206	0	0.274917180189602	2.03589325120599
2008206	1	0.276060808782562	2.08259687983608
2008206	2	0.274974795286801	2.03381137999871
2008206	3	0.267620428219444	1.86687000058114
2008206	4	0.256435063347695	1.69263511972488
2008206	5	0.242628362709348	1.49001781130807
2008206	6	0.230486186972244	1.30384676015837
2008206	7	0.217112229071755	1.16291412123818
2008206	8	0.20741871602396	1.06379549459632
2008206	9	0.199860306462907	0.980755465143925
2008206	10	0.195676658525209	0.923653253036966
2008206	11	0.189621355264155	0.855868901200474
2008206	12	0.181379672390272	0.801051715855727
2008206	13	0.169780828153861	0.75288988766683
2008206	14	0.160405980461658	0.717916435726113
2008206	15	0.139271346986274	0.619470881595488
2008206	16	0.105532115889466	0.480978704244361
2008206	17	0.0702435272946572	0.39593021168827
2008206	18	0.0471191511352701	0.379341029643412
2008206	19	0.0391335714197047	0.388270002190078
2008206	20	0.0473006006585134	0.478926394448496
2008206	21	0.0717055036483737	0.630786530004191
2008206	22	0.077945034718067	0.690783929214456
2008206	23	0.0823154901353892	0.680119024512713
2008207	0	0.0907257976411318	0.687566614048068
2008207	1	0.0923700883433288	0.704222496497706
2008207	2	0.0891342302662498	0.703837703370884
2008207	3	0.0900864082027478	0.723664302320198
2008207	4	0.0944382464663452	0.757346664708394
2008207	5	0.102650896802833	0.799479506647214
2008207	6	0.112193780609743	0.814577339094753
2008207	7	0.122941708262393	0.848599104263249
2008207	8	0.136253849527538	0.917792341480414
2008207	9	0.140667096516269	0.925667706901969
2008207	10	0.132242701725345	0.861226106838656
2008207	11	0.122200413515903	0.789322224973452
2008207	12	0.114650957072091	0.754810112760491
2008207	13	0.110141397932391	0.749217037687981
2008207	14	0.105229925889899	0.732563049368226
2008207	15	0.0968940229764982	0.714038218641768
2008207	16	0.0980915944159522	0.766893514146173
2008207	17	0.0951849207045233	0.806297831436591
2008207	18	0.0938026614428766	0.846017256038891
2008207	19	0.0966739481578039	0.916423998427914
2008207	20	0.100190471725981	0.994465408691776
2008207	21	0.101910089005811	1.05079416706118
2008207	22	0.103933795411306	1.0810619648172
2008207	23	0.105943057038176	1.10435274838623
2008208	0	0.108396347570703	1.12569665552751
2008208	1	0.112929107480514	1.16288236879635
2008208	2	0.112881175328246	1.16103792637306
2008208	3	0.114716485690517	1.16541576516745
2008208	4	0.116554381128338	1.154164572671
2008208	5	0.113981382710848	1.09634304179856
2008208	6	0.11353428962614	1.03142532950883
2008208	7	0.114571044419405	0.984792325354515
2008208	8	0.109233181414504	0.895266677358154
2008208	9	0.0986543100304634	0.769166342068579
2008208	10	0.0858082092418261	0.640793609668165
2008208	11	0.0782678050190359	0.581973739763969
2008208	12	0.0732696640831111	0.552448886834903
2008208	13	0.0680283873442851	0.538997458479699
2008208	14	0.0653321628222206	0.551990026496872
2008208	15	0.0646183877308686	0.594348824121834
2008208	16	0.0658888875361621	0.644760774688851
2008208	17	0.0689142343756437	0.692150490655335
2008208	18	0.0696100582574414	0.715448644451171
2008208	19	0.0733396769199685	0.768350358964865
2008208	20	0.0802676645182492	0.846955386771106
2008208	21	0.0841846060551974	0.890608758293715
2008208	22	0.086308226286938	0.920815391347929
2008208	23	0.0889715632129295	0.962707394942136
2008209	0	0.0926656816537646	1.00785469919807
2008209	1	0.0948573157577533	1.03591316852083
2008209	2	0.0961724785083837	1.05231615078561
2008209	3	0.0985482063629659	1.05753709677443
2008209	4	0.0964687678588464	1.0260814450595
2008209	5	0.0960265449488157	0.991357167769036
2008209	6	0.0966044475707563	0.940532659067204
2008209	7	0.0926159231520196	0.857569526055662
2008209	8	0.0801306911226228	0.703263011084473
2008209	9	0.0697300579218069	0.60096398404063
2008209	10	0.0608759590664181	0.526789339960083
2008209	11	0.0534494056056996	0.485013240659487
2008209	12	0.0498114661312565	0.483662148553411
2008209	13	0.0478057274121792	0.484996124397562
2008209	14	0.0473532584517374	0.502014869542642
2008209	15	0.0484937920620887	0.53262468567767
2008209	16	0.0527675093666376	0.590003487088562
2008209	17	0.0555095382026071	0.636221093488007
2008209	18	0.0577769051073281	0.687403785826415
2008209	19	0.0621743334545949	0.766664231610216
2008209	20	0.0668010695083607	0.850485466897112
2008209	21	0.0678277620462935	0.876372040564827
2008209	22	0.0656197388705411	0.840991979936113
2008209	23	0.0683783481538236	0.842518877728317
2008210	0	0.0682868951824809	0.800599290440374
2008210	1	0.0629368184942479	0.733786329646713
2008210	2	0.0563868396032125	0.687810230544643
2008210	3	0.0518809340338401	0.664810095604004
2008210	4	0.0520396481504055	0.679410573382975
2008210	5	0.0527641109984815	0.660677447513995
2008210	6	0.0507443700339899	0.585671856986621
2008210	7	0.0484093906361137	0.531308252243377
2008210	8	0.047578817472745	0.489079203624374
2008210	9	0.0422424772926008	0.396364498005972
2008210	10	0.0368619238527138	0.318768493897505
2008210	11	0.0336478773801381	0.278969477944253
2008210	12	0.0336129507447053	0.280385537970057
2008210	13	0.0357891753261211	0.298333570427373
2008210	14	0.0395042940170957	0.338027960574004
2008210	15	0.0479930761730799	0.424102401722011
2008210	16	0.0554305042330725	0.513047061225539
2008210	17	0.0620045094008741	0.593965722411518
2008210	18	0.0659825216236881	0.646374082389637
2008210	19	0.0669361997451835	0.699755681972265
2008210	20	0.0706781459794008	0.797886889417747
2008210	21	0.071507753648407	0.855664458146224
2008210	22	0.0686082758506122	0.850874469792318
2008210	23	0.0636327870244507	0.789679009700893
2008211	0	0.0597623028958117	0.729649407038974
2008211	1	0.05491407885751	0.689023682381802
2008211	2	0.052049241284729	0.671822950777739
2008211	3	0.0470725300489999	0.647333515018863
2008211	4	0.0437330564959887	0.637674465946001
2008211	5	0.0451125710739589	0.647355457704324
2008211	6	0.0464935212690035	0.630286523544954
2008211	7	0.0516238954758275	0.656386776382343
2008211	8	0.0542676774304773	0.6598766443695
2008211	9	0.0520825495156115	0.620818049614621
2008211	10	0.051444301917732	0.611694490246618
2008211	11	0.0491518354570469	0.609189697418004
2008211	12	0.0472910160530573	0.641204643866576
2008211	13	0.0475843696807723	0.701115564903154
2008211	14	0.0512061295683649	0.783836904158993
2008211	15	0.0548016387594939	0.855061249794791
2008211	16	0.0619186722889409	0.963622748987179
2008211	17	0.0725705685768186	1.09196207776478
2008211	18	0.0782025596480542	1.18769798224393
2008211	19	0.0810912378506164	1.27226180202177
2008211	20	0.0812341347949829	1.29613976782163
2008211	21	0.0758066089114151	1.18888995453516
2008211	22	0.0718091492877775	1.13631428722264
2008211	23	0.0674092334418907	1.0950041926504
2008212	0	0.0640731137335577	1.0584184662954
2008212	1	0.0620055837753441	1.0118377007298
2008212	2	0.0613472750216555	0.967359927848267
2008212	3	0.0615424292101183	0.92178151455625
2008212	4	0.0598921606232739	0.865717861590763
2008212	5	0.0603363815227645	0.834196504300095
2008212	6	0.059167580216421	0.778952525203095
2008212	7	0.055849033337484	0.680579241172965
2008212	8	0.052053711016148	0.597021988069474
2008212	9	0.0454180849386524	0.499975208176305
2008212	10	0.0420200651062768	0.452072706512545
2008212	11	0.0400513397878387	0.430641698801757
2008212	12	0.0391070316200526	0.414916244341645
2008212	13	0.0391649969960008	0.416182050768138
2008212	14	0.0395260023813041	0.425274727987531
2008212	15	0.0395301214370745	0.429196361555872
2008212	16	0.0396522298438625	0.440084971135048
2008212	17	0.0419837997787408	0.470439999529287
2008212	18	0.0444121213871722	0.49480876934486
2008212	19	0.0471599537536257	0.524938373738924
2008212	20	0.0507764517384086	0.57505988561807
2008212	21	0.0547080957599482	0.635450907959209
2008212	22	0.0591331026385353	0.691659958715554
2008212	23	0.0617661825811144	0.720049602255459
2008213	0	0.0639167600729744	0.740017064756934
2008213	1	0.0673918851564964	0.774514127774898
2008213	2	0.0705855317308711	0.813991996126393
2008213	3	0.0714705353274274	0.836808024384369
2008213	4	0.0696044648734274	0.818919802414996
2008213	5	0.0667152725132253	0.785112725523236
2008213	6	0.0595984578092387	0.692885522914375
2008213	7	0.0558367236205573	0.648809901345715
2008213	8	0.0558141298752739	0.640109003993335
2008213	9	0.0531446880849083	0.590185678896296
2008213	10	0.0469970995983658	0.521127198813968
2008213	11	0.044907627783204	0.498631922232506
2008213	12	0.0411232887116322	0.466965869964214
2008213	13	0.0408787899170407	0.484354568847632
2008213	14	0.0419698560122915	0.523578649659626
2008213	15	0.0442754194614152	0.575828039555736
2008213	16	0.0475672984894311	0.636375971798844
2008213	17	0.050443024946108	0.691616661911368
2008213	18	0.0539103963237603	0.738352577017729
2008213	19	0.0567096513608151	0.776436844277946
2008213	20	0.0567856346969534	0.800700497841353
2008213	21	0.0607483090998292	0.87305639224802
2008213	22	0.0602370695828682	0.86904750839132
2008213	23	0.0603039955786376	0.859774996025547
2008214	0	0.0614155736779444	0.841444041737036
2008214	1	0.0620145386327875	0.816582400337068
2008214	2	0.0623651119435909	0.825664046930099
2008214	3	0.0607071155797297	0.803720524315437
2008214	4	0.0636194265384455	0.822716234428113
2008214	5	0.0618556673692474	0.787950668572018
2008214	6	0.0606667786142671	0.733018948858426
2008214	7	0.0533451162209958	0.610369149223562
2008214	8	0.049132681861305	0.526946628043052
2008214	9	0.0492410669509587	0.50438654350101
2008214	10	0.0407003469797831	0.408475429914103
2008214	11	0.0357349932013524	0.373327808545513
2008214	12	0.0360754942734106	0.394895200246271
2008214	13	0.0325621618189146	0.388967075296037
2008214	14	0.0331703096070264	0.418668887248375
2008214	15	0.0412035090352293	0.568071069831894
2008214	16	0.0519147563414144	0.764438620993882
2008214	17	0.0655004103906349	0.950409867711186
2008214	18	0.0501748187781469	0.827167822649496
2008214	19	0.0286351084032581	0.642003271403719
2008214	20	0.0300501247090792	0.783457662075903
2008214	21	0.0313644381383491	0.842383281926829
2008214	22	0.034881399011997	0.810951823828233
2008214	23	0.0484701254046813	0.843315560499701
2008215	0	0.068571767430842	0.968608498275101
2008215	1	0.079140052578104	1.01973303611244
2008215	2	0.076480418864752	0.985299166115862
2008215	3	0.0630801379869275	0.82987440414623
2008215	4	0.0469231356424481	0.68079369210321
2008215	5	0.0448467947877825	0.694751986900281
2008215	6	0.0456007222700137	0.778864529925377
2008215	7	0.0453923027791995	0.824855178752333
2008215	8	0.0408087020081265	0.709604551366556
2008215	9	0.0418150888314412	0.720379479933772
2008215	10	0.0493096215001709	1.05326262967135
2008215	11	0.0736010218230151	1.7288079088569
2008215	12	0.111351075530362	2.13579627311668
2008215	13	0.122213890222906	2.03191912988903
2008215	14	0.103720056905816	1.71468189707876
2008215	15	0.0910664750763856	1.58114372116988
2008215	16	0.0823145507506824	1.56469180540796
2008215	17	0.0659610879091212	1.33577806834886
2008215	18	0.0706221636795279	1.31774899453479
2008215	19	0.0912523414757834	1.47099946163851
2008215	20	0.10379928415365	1.53668776522569
2008215	21	0.107465104062138	1.68173211979888
2008215	22	0.123003586986215	2.29945569926303
2008215	23	0.108440217948741	2.14060728918058
2008216	0	0.116105707597695	2.01949380882271
2008216	1	0.111225379620972	1.92419095132807
2008216	2	0.0624526353604236	1.23136366996358
2008216	3	0.059823372026255	1.17312276361893
2008216	4	0.0747129332463527	1.3081032858414
2008216	5	0.0816425591356582	1.37397910664995
2008216	6	0.0830060455728803	1.39064670369494
2008216	7	0.0775239970605418	1.30010166370418
2008216	8	0.0754030274675945	1.24967531822166
2008216	9	0.0732702188273493	1.29947847394262
2008216	10	0.0417364565696671	0.918673566623465
2008216	11	0.0308924011581774	0.80930750845855
2008216	12	0.0654841416053467	1.42150460529032
2008216	13	0.0983041842674652	1.88699254378304
2008216	14	0.111087472890142	2.05644794901606
2008216	15	0.112296910395806	1.91231948416124
2008216	16	0.101372589250473	1.66840088599653
2008216	17	0.10146549613014	1.739886809567
2008216	18	0.10144349666159	1.73743261137851
2008216	19	0.0976483149332534	1.57741603790072
2008216	20	0.0990117002057789	1.51016345943609
2008216	21	0.0992888159342073	1.43391885974308
2008216	22	0.0954946042457337	1.33861334689543
2008216	23	0.0861962010536358	1.25149470227158
2008217	0	0.0779328391423225	1.20945461831243
2008217	1	0.0745709072106517	1.12817446878525
2008217	2	0.0740612722011055	1.0544380709317
2008217	3	0.0697253270814311	0.989800100697294
2008217	4	0.0646053769272139	0.895839776769217
2008217	5	0.0593762982177483	0.781729602923424
2008217	6	0.0424372128971198	0.595534155309074
2008217	7	0.0185457588872699	0.329856898449891
2008217	8	0.0174024022427083	0.396695070317424
2008217	9	0.0713586954508843	1.56710888733279
2008217	10	0.102590083416269	2.12822352358679
2008217	11	0.110754833198953	2.25321369126839
2008217	12	0.111281371304588	2.21652438785877
2008217	13	0.103896195649385	1.97300855142869
2008217	14	0.100668645860194	1.80368273870335
2008217	15	0.109422320976306	2.04783290570379
2008217	16	0.101540642659842	2.16024588871527
2008217	17	0.0790833943830519	1.73747663021965
2008217	18	0.0735502990846108	1.57388055724445
2008217	19	0.0593400712582918	1.49765342169077
2008217	20	0.0383314259319121	1.13878411468382
2008217	21	0.029901847755514	0.885829540033309
2008217	22	0.0334939266451264	0.939545452869939
2008217	23	0.048845574912721	1.31551993999797
2008218	0	0.0717354646209217	1.77968959205593
2008218	1	0.0832981105625297	1.99592659380067
2008218	2	0.0875381009388548	2.04374725933698
2008218	3	0.0868582259981004	2.02606124745638
2008218	4	0.0858956934298558	1.9824351412778
2008218	5	0.0824280620533324	1.84444640890577
2008218	6	0.0753300887003196	1.63135229663715
2008218	7	0.0648644640171964	1.39748050540195
2008218	8	0.0584850641465539	1.16651222555808
2008218	9	0.0519051764392414	1.01920632188887
2008218	10	0.0500720206885895	0.966277461402325
2008218	11	0.0484008157047135	0.89812479856747
2008218	12	0.0468114192786531	0.828050860439551
2008218	13	0.0454526705724795	0.748650924024237
2008218	14	0.0424807828447663	0.661523543279
2008218	15	0.0401097050711999	0.597577849990824
2008218	16	0.0380199147280166	0.529222913363263
2008218	17	0.0361002080424705	0.47146171400875
2008218	18	0.0344886250393047	0.430582852602561
2008218	19	0.033356245741207	0.406936664528043
2008218	20	0.0326948823261213	0.394915878218757
2008218	21	0.0321122172972028	0.386504983978372
2008218	22	0.0321651314707893	0.386242157164242
2008218	23	0.0337762847849165	0.393086447308017
2008219	0	0.0354232859989856	0.405314605291136
2008219	1	0.038967398164414	0.453759302628207
2008219	2	0.0521455408051449	0.608475272841716
2008219	3	0.0803951661467165	0.889558737351429
2008219	4	0.101898933813146	1.11217790485546
2008219	5	0.111381193702711	1.24103447864931
2008219	6	0.111629938091203	1.30013302676009
2008219	7	0.108546820492871	1.28626117489424
2008219	8	0.103265740626105	1.28033186113676
2008219	9	0.0991146270185343	1.29064929229584
2008219	10	0.0937633334153231	1.29795906520033
2008219	11	0.0864581656705058	1.23358127844975
2008219	12	0.0792032378161053	1.1168160295866
2008219	13	0.0677696986498247	0.922090463969791
2008219	14	0.0552471597083909	0.756153080507173
2008219	15	0.0506590187657926	0.743701968371855
2008219	16	0.0470705274972001	0.751916891258584
2008219	17	0.0446104794612083	0.773986491199215
2008219	18	0.049267384912197	0.902779041050578
2008219	19	0.0547053809239872	1.04721326644606
2008219	20	0.0592288406588525	1.17156215046125
2008219	21	0.0680094959397674	1.2437085297477
2008219	22	0.0778582501369022	1.28479295682451
2008219	23	0.0836806729856636	1.31514553093563
2008220	0	0.0828110598329044	1.36114209554161
2008220	1	0.0742223973836839	1.24134178764071
2008220	2	0.0548945570128445	0.914790660048442
2008220	3	0.0667256050122027	1.13127009572512
2008220	4	0.0687913946598962	1.22755616573804
2008220	5	0.0693571451421725	1.20320128732598
2008220	6	0.0686313681556579	1.19171789459093
2008220	7	0.0727097643934106	1.19615407405348
2008220	8	0.0728127643325416	1.14756867662734
2008220	9	0.073204419201365	1.12874955682375
2008220	10	0.0753315951988977	1.13390626194825
2008220	11	0.0715915667524242	1.05079414675139
2008220	12	0.0692010682572953	1.01621010473684
2008220	13	0.0818638975493342	1.09253181199451
2008220	14	0.0822792087472499	1.03012395808468
2008220	15	0.0610830718319873	0.911454860420608
2008220	16	0.0394270271732756	0.710023415177868
2008220	17	0.0169070431699205	0.321514239524284
2008220	18	0.0126749902072779	0.292152708276998
2008220	19	0.0197901373365394	0.458839896199862
2008220	20	0.0135014203515941	0.37523832749903
2008220	21	0.0141456173437023	0.440978531683279
2008220	22	0.0108471615939752	0.335406102525504
2008220	23	0.0153535519391168	0.527794623176916
2008221	0	0.0190720012223665	0.697185008505328
2008221	1	0.0132191805684738	0.468381097160789
2008221	2	0.00993965977294665	0.411992314196583
2008221	3	0.0139933349734681	0.501682924207817
2008221	4	0.0358727445644713	1.09398528026198
2008221	5	0.0766235092253959	1.92599176058528
2008221	6	0.0863666665709553	1.9388532714642
2008221	7	0.0829428396451588	1.80004778983713
2008221	8	0.0614604655600521	1.42352806279293
2008221	9	0.0487595460935903	1.3012249904754
2008221	10	0.0496284883108002	1.29682326654737
2008221	11	0.0506580849859103	1.35429846616464
2008221	12	0.0593087480028732	1.71867281200651
2008221	13	0.0651035526508974	1.69371876152631
2008221	14	0.0673841320963783	1.4728235701748
2008221	15	0.105818412137935	2.11130058444114
2008221	16	0.192997212736369	3.63117586288444
2008221	17	0.265080462725881	4.91669005606083
2008221	18	0.325093065611605	6.10297672180869
2008221	19	0.343214476239302	6.6993842797762
2008221	20	0.37999479422335	7.2894012206126
2008221	21	0.396301871172703	7.35544495097847
2008221	22	0.382350629121603	7.15180023363373
2008221	23	0.38232568343579	7.25112605535913
2008222	0	0.38708198703738	7.47707898619853
2008222	1	0.380497400743475	7.10146716026798
2008222	2	0.389191350086183	6.97981676384415
2008222	3	0.395217194471191	6.75490469023941
2008222	4	0.38632392536581	6.40196572939855
2008222	5	0.356578619515279	5.82880620655023
2008222	6	0.312056392001491	5.17585167347745
2008222	7	0.29058083226188	4.68547483364195
2008222	8	0.279146398396629	4.37156833570498
2008222	9	0.270275127827375	4.08769677752491
2008222	10	0.259902341172732	3.74189563215005
2008222	11	0.256624172293018	3.55373910915206
2008222	12	0.252872021385163	3.39706759020213
2008222	13	0.25504672066475	3.18379277736035
2008222	14	0.221736156095075	2.62002673062452
2008222	15	0.177017602159219	2.01317084345282
2008222	16	0.166013987866676	1.86280107370647
2008222	17	0.171884560258817	2.0382043672516
2008222	18	0.150577329490668	2.05772717778717
2008222	19	0.0787548162188817	1.20833794308352
2008222	20	0.0735269220106664	1.04460885717556
2008222	21	0.10573548029259	1.74817206294455
2008222	22	0.186737685918742	3.41857717773286
2008222	23	0.145861023847722	2.9979098181362
2008223	0	0.0659055435112647	1.76623372341974
2008223	1	0.0581156954120891	1.79972908563438
2008223	2	0.104993741493727	2.7739492518293
2008223	3	0.224598310145869	5.38426742532617
2008223	4	0.224784663604	5.10248011472704
2008223	5	0.19172398029051	4.60812114749051
2008223	6	0.109666165510765	3.37305140849715
2008223	7	0.0195177757689888	0.694214604719468
2008223	8	0.112137639794006	2.89718654986792
2008223	9	0.182634939117396	4.93666342197073
2008223	10	0.11899456798405	3.4482460216333
2008223	11	0.0850802873820134	2.9186437822854
2008223	12	0.0868365584220522	2.84679843383807
2008223	13	0.0755764436406215	1.95915657118006
2008223	14	0.0926833570523424	2.01410514950721
2008223	15	0.0961225050580227	1.91612862676758
2008223	16	0.084825764000166	1.60595704221575
2008223	17	0.0845940960923407	1.78441724140345
2008223	18	0.104271811419496	2.47204813597718
2008223	19	0.103539574185891	2.15495623228916
2008223	20	0.118351154973458	2.28472625717983
2008223	21	0.153894513437095	2.83723666944278
2008223	22	0.166292763932082	3.07342465712676
2008223	23	0.185119648856376	3.77534738621288
2008224	0	0.187583933521188	4.0184711182887
2008224	1	0.162843469761552	3.70573350532743
2008224	2	0.142913530987277	3.12237050213644
2008224	3	0.184007794987192	3.63796273187955
2008224	4	0.190359241910337	3.6530224097202
2008224	5	0.198420121990137	3.75300084756132
2008224	6	0.175120399945062	3.28125019161174
2008224	7	0.142891722582436	2.62954308115587
2008224	8	0.153410139839576	2.7416150339078
2008224	9	0.174227236457473	2.98781761358833
2008224	10	0.16713829661798	2.8662359597006
2008224	11	0.1457276915483	2.78328386062527
2008224	12	0.117203986504175	2.32123754422748
2008224	13	0.115681913688314	2.15875747132478
2008224	14	0.130554672580146	2.34241380632426
2008224	15	0.139265843607047	2.33435260309534
2008224	16	0.145414171440372	2.23751242487806
2008224	17	0.148719432777628	2.21959405919712
2008224	18	0.149730235875815	2.17480970033803
2008224	19	0.151459539395128	2.0955136518186
2008224	20	0.152362623875387	2.04135469379964
2008224	21	0.157449884999044	2.03303332517802
2008224	22	0.156649006581116	1.99211343089742
2008224	23	0.153898671624481	1.95150220458024
2008225	0	0.1521988776297	1.96495534023678
2008225	1	0.14593791564264	1.97031163621996
2008225	2	0.105876969746648	1.66167472192304
2008225	3	0.0726282076577348	1.16402132250219
2008225	4	0.0637147057845084	0.827192616995986
2008225	5	0.0755132444336594	0.739482317480884
2008225	6	0.073171069704673	0.665468433996082
2008225	7	0.0648084385350131	0.645647322145095
2008225	8	0.0675861966053079	0.856229666226464
2008225	9	0.068852703899229	0.892784136113118
2008225	10	0.0522015300224723	0.671689638536363
2008225	11	0.0441317972060388	0.581050137891093
2008225	12	0.0385673273630159	0.512698088908731
2008225	13	0.023469094187222	0.481507838805364
2008225	14	0.00878222158798341	0.360553714060437
2008225	15	0.0107780306122062	0.326608018854682
2008225	16	0.0396873887035262	1.04809153800074
2008225	17	0.145292455049024	4.1527098312179
2008225	18	0.190894062394716	6.01989917016394
2008225	19	0.226619032722903	6.19757677244518
2008225	20	0.257712798991246	6.19617698680582
2008225	21	0.297710038009628	6.72221247587575
2008225	22	0.332403484944207	7.18830127833589
2008225	23	0.361682366556684	7.59399910735403
2008226	0	0.393052250953157	8.17587661754487
2008226	1	0.387787680684366	8.26122917214468
2008226	2	0.396395260710548	8.10730853217535
2008226	3	0.418155409138496	7.95635271783779
2008226	4	0.351610934540405	6.94439009584964
2008226	5	0.300492522305873	6.28230216128399
2008226	6	0.296025059691629	6.67715154314468
2008226	7	0.309427425975401	7.14189502757234
2008226	8	0.270918138895603	7.1086689478845
2008226	9	0.274933752670097	7.30507012241652
2008226	10	0.270145612490885	6.93180799370888
2008226	11	0.23791791607686	5.87746855316063
2008226	12	0.223069982376585	5.37841981713372
2008226	13	0.199972594360093	4.76137352954078
2008226	14	0.19974982997789	4.50490214740872
2008226	15	0.197017225007484	4.82218901884991
2008226	16	0.156278807036447	3.99489176306709
2008226	17	0.202571255879107	4.4393542174942
2008226	18	0.249138847810042	5.509255092317
2008226	19	0.237904744118091	5.32626177900482
2008226	20	0.13907406490908	4.0825233029174
2008226	21	0.136500563377635	5.1117938118943
2008226	22	0.237828953245282	7.33539275353047
2008226	23	0.350950066777185	7.73877035594014
2008227	0	0.359511851484205	6.63452254681353
2008227	1	0.241825180797325	5.52940865075316
2008227	2	0.118889576913247	3.49448743566768
2008227	3	0.07725967201498	1.64812516923518
2008227	4	0.0671284643404556	1.16707981910566
2008227	5	0.0763643864456519	1.21545012528213
2008227	6	0.0988747306764146	1.48333161002136
2008227	7	0.121394414504422	1.71466551842224
2008227	8	0.135661091949427	1.95450989703493
2008227	9	0.140218150321857	2.05726829739206
2008227	10	0.14591978878401	2.06106678573622
2008227	11	0.143352688428214	1.93550763258147
2008227	12	0.133548721164826	1.74943261772663
2008227	13	0.118094783464362	1.56531338693071
2008227	14	0.0968979367473704	1.35882904567691
2008227	15	0.076931793120389	1.15957857836637
2008227	16	0.0601404875392043	0.966741068297795
2008227	17	0.0431931452096235	0.79509785814291
2008227	18	0.0366779669455206	0.786397759094983
2008227	19	0.0331940711235842	0.796515629162716
2008227	20	0.0349780968514894	0.836627371618954
2008227	21	0.0342682410932591	0.8664474263025
2008227	22	0.0304277843194469	0.824853391078038
2008227	23	0.0276636467164436	0.714070064855436
2008228	0	0.029153551935209	0.696032549594208
2008228	1	0.0366929924688141	0.72745923688013
2008228	2	0.0440664119700919	0.781218185809923
2008228	3	0.0464952599339761	0.801894369590454
2008228	4	0.035342027236406	0.659052933023516
2008228	5	0.0246768425584512	0.455737488617187
2008228	6	0.0202236766799523	0.348800310932729
2008228	7	0.0225657775205463	0.327854448036436
2008228	8	0.0258830910240982	0.333906078058213
2008228	9	0.0310833809663786	0.377872720955438
2008228	10	0.0384539899570175	0.436968463600328
2008228	11	0.0441057947471728	0.505719125918707
2008228	12	0.0594708234006645	0.643794812217162
2008228	13	0.0936406363386613	0.995415168687819
2008228	14	0.143321395148146	1.47948922715745
2008228	15	0.188750414094661	1.86764843257192
2008228	16	0.213270629381921	2.08976007338292
2008228	17	0.225341761962274	2.18147392437719
2008228	18	0.226335080963076	2.17136466535969
2008228	19	0.222478750262061	2.10926600119592
2008228	20	0.215628066524144	2.05454993340377
2008228	21	0.208914635807293	2.02176949590971
2008228	22	0.202817509862344	1.99571721111422
2008228	23	0.199887576004906	1.98554500979402
2008229	0	0.20172667061575	1.97194219124529
2008229	1	0.197249793072633	1.86852762735329
2008229	2	0.186255399783887	1.70346381565144
2008229	3	0.18093571856971	1.57408671163604
2008229	4	0.179788000039323	1.49789977912004
2008229	5	0.180995985661296	1.45356396777563
2008229	6	0.180220383871675	1.48010770890268
2008229	7	0.178630658741784	1.5474613263765
2008229	8	0.179796471062143	1.62874324012954
2008229	9	0.178804530903454	1.6354653815646
2008229	10	0.17525570548045	1.57949461082949
2008229	11	0.171089165217725	1.54973347410825
2008229	12	0.165792137828379	1.53829804169549
2008229	13	0.164523195593143	1.5443283049422
2008229	14	0.16664939357203	1.55274708096034
2008229	15	0.168462486075361	1.52745412216223
2008229	16	0.166227030246721	1.50108279912658
2008229	17	0.162167776652583	1.47577547892697
2008229	18	0.154356960288903	1.45858741885001
2008229	19	0.146235712488109	1.40438841309922
2008229	20	0.136749614759782	1.34097924768156
2008229	21	0.131922862953267	1.33272262590373
2008229	22	0.125685517017285	1.34789651754457
2008229	23	0.122896859731949	1.42281965585356
2008230	0	0.122353234830261	1.51059641703197
2008230	1	0.118318020099207	1.43773537888932
2008230	2	0.107133954416455	1.24404113096859
2008230	3	0.106041609296596	1.13194665228668
2008230	4	0.107560501904742	1.10978305458131
2008230	5	0.117055191595627	1.17055011655596
2008230	6	0.127857243937437	1.18002633890009
2008230	7	0.131757907540272	1.1183628687066
2008230	8	0.132849087622369	1.01954455377951
2008230	9	0.137438648073796	0.886628384957059
2008230	10	0.133164523994462	0.744036121687751
2008230	11	0.120563810548147	0.607074899247242
2008230	12	0.11228748875078	0.530598629132348
2008230	13	0.108019851607829	0.501298151625042
2008230	14	0.105855780022143	0.507907163885012
2008230	15	0.109785268469794	0.550677481655601
2008230	16	0.110172626722829	0.579418704991882
2008230	17	0.110492747619911	0.600582475952563
2008230	18	0.10833293639866	0.593472102094061
2008230	19	0.10482427924859	0.561908489335302
2008230	20	0.0991269447390453	0.521197614235299
2008230	21	0.0937915438548078	0.54399776577409
2008230	22	0.1099502725843	0.841607459153861
2008230	23	0.126393893342936	1.19381351258925
2008231	0	0.149707073731977	1.63659631890905
2008231	1	0.170588654971893	1.99851950433072
2008231	2	0.175489393402955	2.00291533811909
2008231	3	0.179168235620729	1.93108882360366
2008231	4	0.151779153168665	1.52437402321168
2008231	5	0.131246306117939	1.31770642884219
2008231	6	0.119584962549129	1.25083790108929
2008231	7	0.0785416934871939	0.896039181849088
2008231	8	0.0433654172941783	0.530480389053887
2008231	9	0.0745830928152343	0.871310392338055
2008231	10	0.111037349596761	1.24144598448675
2008231	11	0.137879970372718	1.53121793229673
2008231	12	0.169762801710425	1.74575713318697
2008231	13	0.178201847362034	1.73457183049172
2008231	14	0.197489788258511	2.06667966292637
2008231	15	0.229549684060334	2.7324685773213
2008231	16	0.262187803994511	3.03552217955832
2008231	17	0.248704288251043	2.51259101029522
2008231	18	0.181824140931062	1.42665681723243
2008231	19	0.118110679997262	0.764696637917813
2008231	20	0.0936062195819537	0.643751537582459
2008231	21	0.109047943558927	0.93869335886352
2008231	22	0.110412710590306	0.88209281802878
2008231	23	0.0952253390939828	0.665024458569454
2008232	0	0.0755718161351704	0.597401998780084
2008232	1	0.0580177007921133	0.728310558962183
2008232	2	0.0671313455258938	1.15012693835195
2008232	3	0.0797731097017762	1.43576746202968
2008232	4	0.0701415298614896	1.2679765637644
2008232	5	0.0600699547544407	1.1092929599197
2008232	6	0.056003316988719	0.972274016289634
2008232	7	0.0725632417732101	1.19151910557175
2008232	8	0.0798143197064393	1.2940103131366
2008232	9	0.0594188220923947	1.05386810748114
2008232	10	0.0647414959049392	1.08844202214455
2008232	11	0.113527048428374	1.73489091075283
2008232	12	0.100537608737934	1.59206387319235
2008232	13	0.113663960794366	1.74759205372633
2008232	14	0.126143950485438	1.67125803932476
2008232	15	0.120726022260216	1.56848439656392
2008232	16	0.150879359075416	2.17536456758604
2008232	17	0.208706763167575	3.02799611728482
2008232	18	0.218279766081347	2.96005022417456
2008232	19	0.196662508373187	2.80095626541572
2008232	20	0.166187721433777	2.81292773602066
2008232	21	0.145248352039745	3.17922366317111
2008232	22	0.104844164578711	3.27677427108782
2008232	23	0.0731784991734937	2.65976582159272
2008233	0	0.0551856139693082	1.88641366357675
2008233	1	0.0729513983513654	2.19806314006006
2008233	2	0.095271520801253	3.01126316889918
2008233	3	0.113591703937794	3.65910724607818
2008233	4	0.124231497162765	3.43932977440225
2008233	5	0.126940140002753	3.54264515878359
2008233	6	0.115203258666856	3.14061834634267
2008233	7	0.119957279009487	2.92229068607097
2008233	8	0.124457593614766	2.78580655135196
2008233	9	0.130007445423139	2.5651936097957
2008233	10	0.122142299591205	2.34156446966044
2008233	11	0.109597283847489	2.14562232287242
2008233	12	0.10673730381397	2.14463463953202
2008233	13	0.0985846430591884	2.13388720218237
2008233	14	0.0835416933206823	1.85323505025851
2008233	15	0.0758123209323984	1.66705422118211
2008233	16	0.0794119287953291	1.65746073426105
2008233	17	0.0793275886033523	1.62714729265986
2008233	18	0.0761765934214232	1.44624421168884
2008233	19	0.0695940272442955	1.37957683367361
2008233	20	0.0655382105407416	1.3780547701801
2008233	21	0.0588144767410219	1.22907313803286
2008233	22	0.0628432592900921	1.0441177143143
2008233	23	0.0686226555204509	0.97853868085092
2008234	0	0.0649387235975419	0.922868740625282
2008234	1	0.0431302353374514	0.813742636838341
2008234	2	0.0327790257567052	0.776612142979149
2008234	3	0.0792388547499119	1.68232937192206
2008234	4	0.112321912927692	2.06109906895025
2008234	5	0.114852760174338	1.99467156306593
2008234	6	0.103013834048087	1.64959351030823
2008234	7	0.0762271304916672	1.14619585439172
2008234	8	0.0502525494347248	0.718778271560879
2008234	9	0.0327527102902277	0.440560824900269
2008234	10	0.0239247620010082	0.312728715366951
2008234	11	0.0204779237242077	0.260009330579275
2008234	12	0.0194008653615481	0.221709387456657
2008234	13	0.0205820050887073	0.211358216443961
2008234	14	0.0212266139371393	0.191884197305587
2008234	15	0.0212227702458158	0.180859515101574
2008234	16	0.0210248784499288	0.179122862862492
2008234	17	0.019756950470962	0.17302009680814
2008234	18	0.0167356043966494	0.183551652475109
2008234	19	0.0169153216033278	0.260081853016429
2008234	20	0.0152296728775619	0.306362157660078
2008234	21	0.0177016992644392	0.447785696430037
2008234	22	0.035150210050431	0.81210432581503
2008234	23	0.0638331627995279	1.17967768744838
2008235	0	0.0685202850289268	1.11867112536092
2008235	1	0.0649779131464222	1.01412916363051
2008235	2	0.0576037830906669	0.919540291937142
2008235	3	0.0539645989432308	0.931558165092956
2008235	4	0.067273974955468	1.1598632721462
2008235	5	0.0838621019240035	1.44280486991695
2008235	6	0.0759808463283824	1.29819770404461
2008235	7	0.0519492719677136	1.02285843112653
2008235	8	0.0332794979466636	0.716354107050467
2008235	9	0.0228243648544415	0.478179470774542
2008235	10	0.0121925441812146	0.256113188381951
2008235	11	0.00686845685652488	0.148642628248221
2008235	12	0.0128997464508343	0.260930961902365
2008235	13	0.0467788636275752	0.881080470878462
2008235	14	0.0988633408455813	1.57325315974991
2008235	15	0.12736914615148	1.73184122295715
2008235	16	0.134618625597039	1.73244311231945
2008235	17	0.138138470337779	1.92427828016402
2008235	18	0.134218607135898	2.16996249956429
2008235	19	0.139406818456478	2.33050133692054
2008235	20	0.152013863820616	2.61162453060746
2008235	21	0.164683917242386	2.97055717934545
2008235	22	0.168175880785113	3.24987314333136
2008235	23	0.164188663612539	3.3159226638583
2008236	0	0.15974701763416	3.20033823020682
2008236	1	0.142916971967889	2.92265130225183
2008236	2	0.141778361876975	2.66742501133998
2008236	3	0.14036012125073	2.45907478594275
2008236	4	0.141911272494429	2.32290604858819
2008236	5	0.132101146176714	2.08651439935641
2008236	6	0.123908398583773	1.89312624738652
2008236	7	0.117676945429699	1.75667813857252
2008236	8	0.112472305179893	1.63301906411492
2008236	9	0.108700277527908	1.52712571214446
2008236	10	0.10599838489157	1.46637806981881
2008236	11	0.106834533973141	1.46354477306005
2008236	12	0.107533376422936	1.44264863297191
2008236	13	0.106344570509594	1.40057735528245
2008236	14	0.105391857639232	1.38932801293441
2008236	15	0.105665290991737	1.40977085587317
2008236	16	0.106641636482799	1.44264454101816
2008236	17	0.107212420306786	1.46280649545686
2008236	18	0.106893052374301	1.42248092778892
2008236	19	0.102461227593562	1.29747042909522
2008236	20	0.0982691238487225	1.20555983869972
2008236	21	0.0972410931934344	1.17743731970919
2008236	22	0.094912258593028	1.1479730277311
2008236	23	0.094775666274732	1.16015998500939
2008237	0	0.0991202262356415	1.19164637657378
2008237	1	0.10156151041394	1.16848048751673
2008237	2	0.0985902245173859	1.10153765700129
2008237	3	0.0868543219417002	0.960825942944434
2008237	4	0.0636658631833439	0.73834588911527
2008237	5	0.0449988408350226	0.566422691319133
2008237	6	0.038342187005619	0.496147430927956
2008237	7	0.0360889244929156	0.455195253322212
2008237	8	0.0338149594480442	0.418975999585969
2008237	9	0.0329746198687325	0.413150625928908
2008237	10	0.0343664094583984	0.425267982186681
2008237	11	0.0414058763559369	0.48501697693795
2008237	12	0.0586974901924549	0.641119314310833
2008237	13	0.070115627435001	0.705038989398781
2008237	14	0.0841785265752132	0.83032723880139
2008237	15	0.138651441503363	1.52701462225657
2008237	16	0.18730232894124	2.14691648876734
2008237	17	0.156580642248941	1.80004928875468
2008237	18	0.104438579220539	1.27586645175072
2008237	19	0.105316125566804	1.31398364302122
2008237	20	0.120733361069689	1.53533426610501
2008237	21	0.136767841122693	1.75847721543271
2008237	22	0.138110349336628	1.76760465738168
2008237	23	0.130400537777051	1.66420479901116
2008238	0	0.119580391221586	1.54839658428944
2008238	1	0.110599033085769	1.50158166142572
2008238	2	0.10622404499576	1.53547353262264
2008238	3	0.101734415770921	1.60961937414424
2008238	4	0.105326105331651	1.65985735101971
2008238	5	0.111880897440595	1.71568098705947
2008238	6	0.115768326617806	1.69610834768104
2008238	7	0.113137876355229	1.61613240771136
2008238	8	0.110912597908458	1.52736505300839
2008238	9	0.109583014181744	1.48817603485126
2008238	10	0.104506794323625	1.48001882052137
2008238	11	0.0999232005564028	1.35255071204451
2008238	12	0.0616930654209257	0.921771983373112
2008238	13	0.0318988324460178	0.444091601666112
2008238	14	0.0256164944107828	0.396862285306133
2008238	15	0.0322307239338239	0.47894918156313
2008238	16	0.0618485391027179	0.936205123396926
2008238	17	0.127141315509728	1.83644528572713
2008238	18	0.186333812783093	2.62869273738524
2008238	19	0.215543514259403	2.97725549782472
2008238	20	0.229737305045846	2.97446946652636
2008238	21	0.234133623717759	2.92274520169939
2008238	22	0.221630070493701	2.88986671539009
2008238	23	0.169081187190043	2.38480679168708
2008239	0	0.140590161778384	1.79298293011402
2008239	1	0.14023759513342	1.72049752639242
2008239	2	0.173742740179919	2.02462201256154
2008239	3	0.187234282854246	2.26121148363073
2008239	4	0.129046314319408	1.74896170166707
2008239	5	0.0834683346859339	1.13436406702608
2008239	6	0.101218395971634	1.17970644747785
2008239	7	0.138761722469915	1.52140337390782
2008239	8	0.147306827789729	1.57744740394368
2008239	9	0.143547578067479	1.48485861901069
2008239	10	0.121116549165795	1.34767380698698
2008239	11	0.116178253300731	1.22257638976069
2008239	12	0.106124785767732	1.10316885816643
2008239	13	0.0972768847296213	1.00044724879601
2008239	14	0.0925512208144377	0.931613971862627
2008239	15	0.0857403073323612	0.913139615846847
2008239	16	0.0818823256827206	0.900124280632084
2008239	17	0.0774324965986148	0.897852540270086
2008239	18	0.0727642956764344	0.890576622679155
2008239	19	0.0754302290226908	0.895093454500534
2008239	20	0.0829792506220783	0.890417177906658
2008239	21	0.108023209746662	0.946189959646741
2008239	22	0.129246488620373	1.0970122428982
2008239	23	0.144030422280466	1.36857378523393
2008240	0	0.148475056493043	1.61855350697387
2008240	1	0.193372361345114	2.31176508386191
2008240	2	0.208048274079347	2.56893331214301
2008240	3	0.18978673319622	2.33414451203507
2008240	4	0.152686109960296	2.01223518107779
2008240	5	0.152401777062332	2.06842054357737
2008240	6	0.151702988290085	2.37541434789763
2008240	7	0.146467630274075	2.48111653917353
2008240	8	0.144461222179923	2.50891050766068
2008240	9	0.151038027347147	2.66678593184212
2008240	10	0.16846175304132	3.14675566926655
2008240	11	0.186773964901571	3.34793260377463
2008240	12	0.186364228376068	3.39359699669384
2008240	13	0.225691665820384	4.28520531471017
2008240	14	0.247360203376704	4.90927698164926
2008240	15	0.266741531599805	5.18422671086385
2008240	16	0.271644040010805	5.11369682490175
2008240	17	0.27527390727204	4.39188135354853
2008240	18	0.268436694291697	3.87463662256595
2008240	19	0.276031404952194	3.69255044833673
2008240	20	0.256726169728327	3.21670180786003
2008240	21	0.178830547498772	2.14130220431401
2008240	22	0.161859678749475	1.92151255908486
2008240	23	0.139457314707112	1.74718385917277
2008241	0	0.132968123600602	1.53521151118418
2008241	1	0.123207739532199	1.37164348467339
2008241	2	0.121863195808501	1.30638689785792
2008241	3	0.127757322576659	1.30594215047105
2008241	4	0.131543486612483	1.32979577561088
2008241	5	0.134809181454068	1.34011141566569
2008241	6	0.125865551817002	1.2163001868309
2008241	7	0.115588329032949	1.09003686361777
2008241	8	0.110847301761126	1.10476245885655
2008241	9	0.104278957453113	1.24739441155717
2008241	10	0.0991879498624224	1.48663360920144
2008241	11	0.0980498097874136	1.6094621668784
2008241	12	0.0905660907865596	1.60708444332415
2008241	13	0.0946010811753453	1.68460879897941
2008241	14	0.113272390189484	1.89672003321053
2008241	15	0.142609385228215	2.21917159028471
2008241	16	0.156880048799005	2.4096523919967
2008241	17	0.128967802151267	2.09196988206669
2008241	18	0.0670954839059304	1.16176894929151
2008241	19	0.0481719290122989	0.835462508449193
2008241	20	0.0525840674714284	0.756150913529078
2008241	21	0.0668484485852843	0.774987225351239
2008241	22	0.077519586675309	0.856166239137449
2008241	23	0.0974224148542562	1.16896861432481
2008242	0	0.119502092262729	1.49200257833329
2008242	1	0.130321504451292	1.60564232129497
2008242	2	0.135607689054512	1.64268549310352
2008242	3	0.142329606000466	1.69768257988173
2008242	4	0.147172273425083	1.75284448057674
2008242	5	0.152365672416341	1.82437216865626
2008242	6	0.154593560944637	1.82877711119564
2008242	7	0.152052147617964	1.78750096306477
2008242	8	0.150035480464808	1.78668622327656
2008242	9	0.144916780605726	1.7736837414444
2008242	10	0.138778641206403	1.73716765653906
2008242	11	0.12892746582949	1.642663209082
2008242	12	0.121823451179736	1.60130863844757
2008242	13	0.119966441049474	1.60646096173832
2008242	14	0.117823801795155	1.57081063293207
2008242	15	0.114346200333341	1.49620116271115
2008242	16	0.107900626475408	1.36779539166867
2008242	17	0.101717560875734	1.24345541232771
2008242	18	0.0979282281380997	1.13695804717608
2008242	19	0.0951372476398561	1.04455996623898
2008242	20	0.0921185100545314	0.958575573622855
2008242	21	0.0895657398166866	0.892560895989797
2008242	22	0.0875003130421611	0.846178393263742
2008242	23	0.0868124171301471	0.84038112195556
2008243	0	0.0916524301495416	0.899700872243185
2008243	1	0.100681962949893	1.00946273087629
2008243	2	0.108096238348385	1.13178568396385
2008243	3	0.118629314865257	1.25541067691392
2008243	4	0.124276735151341	1.32809464713525
2008243	5	0.125008328240502	1.35666556173101
2008243	6	0.123582076940582	1.41678390659423
2008243	7	0.131069531319025	1.65238229314556
2008243	8	0.152954480690418	2.10170434567083
2008243	9	0.176949637683923	2.5614427788195
2008243	10	0.191403179215017	2.85551925212115
2008243	11	0.20331438449905	3.01234299728831
2008243	12	0.200112350209204	2.91943670899059
2008243	13	0.19715314658966	2.89001590803515
2008243	14	0.200433328720741	2.91370160437544
2008243	15	0.201035047471352	2.92739192128837
2008243	16	0.202547034977902	2.91907624478295
2008243	17	0.1915456383716	2.77962316636216
2008243	18	0.168699715739386	2.46854677432042
2008243	19	0.160158051486156	2.40373861269888
2008243	20	0.15466007445795	2.4183630615576
2008243	21	0.150489327035184	2.39661162526246
2008243	22	0.134863358303338	2.10845059627531
2008243	23	0.13389697938038	1.89708110699621
