# Supplementary material for: A comparison of sea salt emission parameterizations in northwestern Europe using a chemistry transport model setup
Source: Copernicus journal article supplement (doi:10.5194/acp-16-9905-2016), 2016-08-08
Supplement: Supplementary file 2 [file acp-16-9905-2016-supplement.zip › conc/conc.timeseries.values.sum2008.base.Na.DE0002R.csv]

doy	hour	pm2.5	pm10
2008183	0	0.0241286215847658	0.0387128649771833
2008183	1	0.0237294862550685	0.0369395272346
2008183	2	0.0234766357836847	0.0358286811542185
2008183	3	0.0233991118697458	0.0354682127010362
2008183	4	0.0231894949885616	0.03540402946351
2008183	5	0.0216921978252373	0.0349461951132884
2008183	6	0.0266252566223005	0.0573388309555549
2008183	7	0.0289306481364599	0.0680512679870278
2008183	8	0.0318614541696593	0.0728311392757166
2008183	9	0.0297724532130809	0.0588190686925565
2008183	10	0.0268703214748588	0.0504024953354431
2008183	11	0.0244000398420807	0.0435391000756694
2008183	12	0.0208441618268839	0.034633232680194
2008183	13	0.0180051951068884	0.0281004202234478
2008183	14	0.0155782774476532	0.0236627285515519
2008183	15	0.0137536575753296	0.0205180442458072
2008183	16	0.0123743728779873	0.0183785363449606
2008183	17	0.0114039792268445	0.0170869662697292
2008183	18	0.0107689787011711	0.016404549036539
2008183	19	0.0101898530185187	0.0158556691653928
2008183	20	0.00987828976557488	0.0150600920039418
2008183	21	0.00997743873718087	0.0146817686039304
2008183	22	0.0105968685476013	0.0155064210746139
2008183	23	0.0110848422718353	0.016670214428897
2008184	0	0.0118870305666384	0.0185799191703125
2008184	1	0.0139276931079025	0.0234670004275401
2008184	2	0.0172609442639369	0.0323141287650134
2008184	3	0.0203176523515822	0.0415116961108751
2008184	4	0.0224891322569088	0.0470024713345579
2008184	5	0.0245013619692485	0.0486950578868443
2008184	6	0.0255777704774998	0.0468048928494677
2008184	7	0.0238667146107445	0.0402372194945344
2008184	8	0.0211158288433401	0.0339975572779727
2008184	9	0.01690741958052	0.0260338281528652
2008184	10	0.0131031234604848	0.0188221262301168
2008184	11	0.0111258087694587	0.0151861307636834
2008184	12	0.00989904302834638	0.0129990414150547
2008184	13	0.00877498634171775	0.0113175103976237
2008184	14	0.00820920023289681	0.0103861550972813
2008184	15	0.00774565639433808	0.00974766344427221
2008184	16	0.00743710967912147	0.00941196459780687
2008184	17	0.00713245705013406	0.00917610826989593
2008184	18	0.00681421233092991	0.00889079562247671
2008184	19	0.00622200074492685	0.00815671107735936
2008184	20	0.00568507341017862	0.00701943757033284
2008184	21	0.00554525703178916	0.00663456688187684
2008184	22	0.00558186383429036	0.00669512810749037
2008184	23	0.00675785707507879	0.00793238763908431
2008185	0	0.00868853451425203	0.0101619212065315
2008185	1	0.0104566907982083	0.0122125194678997
2008185	2	0.0116131155926417	0.0136283740236595
2008185	3	0.0120925158984597	0.0143246257457955
2008185	4	0.0117461963634898	0.0142319111056762
2008185	5	0.0110073720841041	0.0136607856905347
2008185	6	0.0103100520888224	0.0128104506122703
2008185	7	0.00897177615967898	0.0109724489784925
2008185	8	0.0074877070496172	0.00911504101938362
2008185	9	0.00677754365202955	0.00830383483762287
2008185	10	0.00623807039337861	0.007744592414382
2008185	11	0.00567321933260339	0.00716971442816211
2008185	12	0.00514924156397582	0.00664643087491926
2008185	13	0.00465941959896737	0.00612233488141126
2008185	14	0.00432645435065139	0.0058229873512407
2008185	15	0.00404287203243469	0.00547167330909146
2008185	16	0.00349406005608539	0.00488867104782905
2008185	17	0.0019559122100329	0.00311382845733571
2008185	18	0.0012375408908822	0.00213275998847435
2008185	19	0.00265944969932857	0.0119596179652848
2008185	20	0.0125865965607189	0.0687631196458998
2008185	21	0.0263249241981365	0.143389172994128
2008185	22	0.0350131308462464	0.189017968676262
2008185	23	0.032570861612448	0.190242911648352
2008186	0	0.0240900380781236	0.178110912700977
2008186	1	0.0172787207172063	0.160677338465855
2008186	2	0.0138423213215767	0.141013158464691
2008186	3	0.0125590497781412	0.115907867494942
2008186	4	0.0126565213914962	0.0883672666636592
2008186	5	0.0133304349042381	0.0696142200555011
2008186	6	0.0124347542213849	0.0531068980133369
2008186	7	0.00974420777165714	0.0379051852206316
2008186	8	0.006246306804182	0.0277743521236899
2008186	9	0.00406556960130471	0.025146684200927
2008186	10	0.00285878843235272	0.0258945445981483
2008186	11	0.00227804939552612	0.0282003984307299
2008186	12	0.0020659706751884	0.0296191976353767
2008186	13	0.00226132221615898	0.0309182573793971
2008186	14	0.00269199501712619	0.0324875413981199
2008186	15	0.00283388250477927	0.0389835389799739
2008186	16	0.0039479114389857	0.0549351806020055
2008186	17	0.00482393499695877	0.0677905318106591
2008186	18	0.00545435219068312	0.0737169776346011
2008186	19	0.00789685138498275	0.0935168867667169
2008186	20	0.0126383894236519	0.117063103965269
2008186	21	0.0188039172939678	0.126400805394575
2008186	22	0.0225693185649664	0.131282631702218
2008186	23	0.0235468237737169	0.124793080910864
2008187	0	0.0258041065833909	0.121078005738759
2008187	1	0.0251657309113256	0.0941800428597312
2008187	2	0.0245824715354022	0.0940005439130039
2008187	3	0.0244812318232838	0.0993031706573918
2008187	4	0.0224265954982818	0.101423206675431
2008187	5	0.0216942121351328	0.109291929576151
2008187	6	0.019357486604826	0.107008732356877
2008187	7	0.0195047205153076	0.122850108978694
2008187	8	0.0227363589210313	0.157743114391343
2008187	9	0.0233380199950737	0.154463135674248
2008187	10	0.0238338737164618	0.147854345983018
2008187	11	0.024303414243079	0.136679454942231
2008187	12	0.0243835515792787	0.125488354005966
2008187	13	0.0242990604987159	0.117839320794663
2008187	14	0.0234350683044303	0.115127689561651
2008187	15	0.0237953827340818	0.12090213332996
2008187	16	0.0241785753073773	0.12331591106734
2008187	17	0.024642915284753	0.120090493504175
2008187	18	0.0234459477641475	0.108924286249488
2008187	19	0.0212794023756051	0.0966423940714022
2008187	20	0.0187901193518119	0.0847288615610737
2008187	21	0.0165921619667924	0.0740270419226968
2008187	22	0.0144139824361691	0.0657774819027099
2008187	23	0.0127769122986449	0.059186947289247
2008188	0	0.0122093508468516	0.0535418776317651
2008188	1	0.0117394495987343	0.0474146823497433
2008188	2	0.0119888293292838	0.0421131405436397
2008188	3	0.0122039038315593	0.0366812450517309
2008188	4	0.0111659996171433	0.0301192586567333
2008188	5	0.0136113502251403	0.0378386287786231
2008188	6	0.0170158141656726	0.0509286599571472
2008188	7	0.0175563113522348	0.0464107630274025
2008188	8	0.0166332335819143	0.038332787493214
2008188	9	0.0175992827779972	0.0354145226342573
2008188	10	0.0124056029296418	0.0230481488435583
2008188	11	0.00917033364750803	0.0183632251644961
2008188	12	0.0116506858503246	0.02759638955846
2008188	13	0.0335402504594892	0.0817082218954928
2008188	14	0.0487883269064796	0.0968639384545702
2008188	15	0.0539173868548261	0.0955193150221104
2008188	16	0.0584746206283412	0.103564186249931
2008188	17	0.0669426133889226	0.124216088239771
2008188	18	0.0710893054073587	0.120131082603295
2008188	19	0.0709963373311591	0.104383675504351
2008188	20	0.0706687222723778	0.0960481231434217
2008188	21	0.0712678873838978	0.0920653817068446
2008188	22	0.070757089839624	0.0878931587075942
2008188	23	0.067597020317959	0.0809725443160436
2008189	0	0.0634547302274494	0.0743924606302483
2008189	1	0.0612820583471418	0.0712422519744881
2008189	2	0.059612363364855	0.0692535816150435
2008189	3	0.0568446668105445	0.0666288543208502
2008189	4	0.0532520345521851	0.0632248114718071
2008189	5	0.0502521771935762	0.0590181340853761
2008189	6	0.0498189625412663	0.0577255584251698
2008189	7	0.0508315016696811	0.0604609663133994
2008189	8	0.0601329153695302	0.106985070854313
2008189	9	0.0540307316264384	0.111138756961933
2008189	10	0.0414818434491867	0.0891586370828147
2008189	11	0.0350441339743034	0.094988448280796
2008189	12	0.0339994122054882	0.110662042379894
2008189	13	0.0353583739786917	0.12597527338583
2008189	14	0.0355926590453664	0.127185256419152
2008189	15	0.0389010118939125	0.128308172172404
2008189	16	0.0418419666845262	0.116763240711593
2008189	17	0.0466564815899702	0.12734866916623
2008189	18	0.0514002102934275	0.134133147028199
2008189	19	0.0550458848198464	0.145469909755134
2008189	20	0.0571527418219332	0.144162035281101
2008189	21	0.051981556117334	0.115592479449641
2008189	22	0.0410422513630315	0.0919957849760845
2008189	23	0.0178526525926131	0.0789136058157358
2008190	0	0.020149362248619	0.134523312847466
2008190	1	0.0368285289710337	0.234815266474199
2008190	2	0.047298943967843	0.274586453888623
2008190	3	0.0440309858772609	0.252700286774584
2008190	4	0.0389880240656863	0.225164184920748
2008190	5	0.0560415251566007	0.292220585748431
2008190	6	0.0898592099898222	0.390576510948671
2008190	7	0.090732417716542	0.339859542580755
2008190	8	0.0880331614418859	0.292266959286679
2008190	9	0.0953620767109302	0.283610934098
2008190	10	0.100503527744961	0.265476851425951
2008190	11	0.0880929084202159	0.205028896846272
2008190	12	0.0772329459643791	0.228124600449811
2008190	13	0.0735838656798168	0.304354507672113
2008190	14	0.068440531835235	0.304763217476258
2008190	15	0.0746257649997863	0.312706139313687
2008190	16	0.0872226113728947	0.318884635967973
2008190	17	0.0962286117625538	0.324330926299273
2008190	18	0.10651030162405	0.375085767867294
2008190	19	0.0869210799806648	0.289228937580661
2008190	20	0.0501922096171451	0.195494264367375
2008190	21	0.0510515205980197	0.167932180514398
2008190	22	0.0528609563882024	0.12591063205272
2008190	23	0.0645955734953983	0.131549866431402
2008191	0	0.0829329700765307	0.218905993197923
2008191	1	0.0801429594155177	0.212301235972263
2008191	2	0.0949630933823162	0.22914931861856
2008191	3	0.11561960913505	0.304896206482939
2008191	4	0.0943238928424683	0.329851115367606
2008191	5	0.0935334740512744	0.33325172435898
2008191	6	0.0969972969998048	0.339736123843434
2008191	7	0.0861150878566006	0.374272653066965
2008191	8	0.0867880465418818	0.399295387476499
2008191	9	0.0930369850437523	0.421090459133255
2008191	10	0.102601125734636	0.448860824522279
2008191	11	0.0972327816825999	0.395334091191646
2008191	12	0.0894514790074202	0.399489897293172
2008191	13	0.0878025624996094	0.522322120463522
2008191	14	0.0917294032499108	0.562703002570777
2008191	15	0.0932109774691952	0.470372302916215
2008191	16	0.0901825142387504	0.457450606410168
2008191	17	0.0910982921040315	0.483837376517805
2008191	18	0.0879667299842869	0.436448732577946
2008191	19	0.0835373970255627	0.396690105424748
2008191	20	0.081212554328476	0.354523560433019
2008191	21	0.0843135920617277	0.263394795164886
2008191	22	0.064092362955792	0.125226882505331
2008191	23	0.0255406563848478	0.0421080055039865
2008192	0	0.00374195129050188	0.00687104021991305
2008192	1	0.000666956905122838	0.00165433600374825
2008192	2	0.000192982069441627	0.000766051697328821
2008192	3	0.000274757062683063	0.000896697797611387
2008192	4	0.00110940388193981	0.00264175600683025
2008192	5	0.00168723637640582	0.00378081225489715
2008192	6	0.000496628167703699	0.00129812494853724
2008192	7	0.000266738467169684	0.000697012372718416
2008192	8	0.00985462647853154	0.015307944342656
2008192	9	0.0231216854548687	0.027440081499535
2008192	10	0.0304927867203936	0.0752563568548111
2008192	11	0.0369398636474205	0.132328430466831
2008192	12	0.0315655256837613	0.113212281570538
2008192	13	0.0351814372227672	0.172817941686291
2008192	14	0.0419628553073163	0.205249068524076
2008192	15	0.0501842360656979	0.195755416264197
2008192	16	0.0312554197721219	0.0775324181703517
2008192	17	0.0203603083390236	0.0473214085827738
2008192	18	0.00485361868429475	0.0101476344088961
2008192	19	0.00809784866671342	0.0190426383181236
2008192	20	0.014499016814826	0.0332033398509453
2008192	21	0.0123981961737126	0.0298939848678772
2008192	22	0.00308808607048135	0.00782201143893719
2008192	23	0.00111456433351546	0.00239213966103106
2008193	0	0.00367226534281966	0.00747429599200793
2008193	1	0.00873077800750259	0.0183078318177491
2008193	2	0.0154549453896183	0.0292854400430675
2008193	3	0.00329554642134853	0.00571882441293257
2008193	4	0.000814836940690157	0.001257828139455
2008193	5	0.00668928264008731	0.00960609898790873
2008193	6	0.00945340289041123	0.0166189844684076
2008193	7	0.00825767156926455	0.0540827488022816
2008193	8	0.0118697920469649	0.0867282007485785
2008193	9	0.0156905253599488	0.0849988697200588
2008193	10	0.0167316239380997	0.0781518295263297
2008193	11	0.0166460847023744	0.0696658771648437
2008193	12	0.0162296218886821	0.0627777977716492
2008193	13	0.0140772433033484	0.0533838958225477
2008193	14	0.00878512005993353	0.0342210785842882
2008193	15	0.00720130076536718	0.0303411341585887
2008193	16	0.00935260131006197	0.0383777560908035
2008193	17	0.00905751143504549	0.0354284115590253
2008193	18	0.00882379043501224	0.0329167399612503
2008193	19	0.00828582099586481	0.0291739969157635
2008193	20	0.00757103529104108	0.0266880588502901
2008193	21	0.00657420933082068	0.0241604951255373
2008193	22	0.00437344706865905	0.0209638860290813
2008193	23	0.00531769720051206	0.025780918650635
2008194	0	0.00933241960534565	0.0356809100658312
2008194	1	0.0128450265926527	0.0448298089043217
2008194	2	0.01241229898664	0.0477378763196131
2008194	3	0.0144173913752414	0.105831481501763
2008194	4	0.0202970919169191	0.163527670721351
2008194	5	0.0167969443155695	0.102698724123661
2008194	6	0.0215512431945782	0.161796467002881
2008194	7	0.0230405075949112	0.140412886122283
2008194	8	0.0296000729306479	0.123925944733015
2008194	9	0.0486226304006493	0.184699175105245
2008194	10	0.0484259694155781	0.174791169484852
2008194	11	0.0529987112036507	0.189750072123011
2008194	12	0.0668011374606116	0.271374819210745
2008194	13	0.0697023997719934	0.290478775075418
2008194	14	0.0669656237484119	0.264113952071203
2008194	15	0.0516049600334547	0.160512268377013
2008194	16	0.0231703785184805	0.0590428340099888
2008194	17	0.00679857602517068	0.0274713169475294
2008194	18	0.0107058058408922	0.0720075263142274
2008194	19	0.0414377698936349	0.229134632036963
2008194	20	0.0697058734113251	0.319946284458322
2008194	21	0.080672050696909	0.339621916998079
2008194	22	0.0846999141444898	0.314914518661031
2008194	23	0.0845017444293404	0.248032068785272
2008195	0	0.0828150631299111	0.19821159668394
2008195	1	0.0756398754569097	0.15757475826316
2008195	2	0.0695357980595779	0.141029172293655
2008195	3	0.0639433016300402	0.129909143400747
2008195	4	0.0575125519261377	0.125129244669456
2008195	5	0.0500056864631838	0.127853873169614
2008195	6	0.0505725986209357	0.193006840985658
2008195	7	0.0504620130733376	0.200914172943539
2008195	8	0.0479987827641425	0.178241961295773
2008195	9	0.0440912098857266	0.154817174308653
2008195	10	0.0377105035683377	0.121184958527067
2008195	11	0.0293689792886941	0.0845387708097649
2008195	12	0.0238677711545795	0.0563670144629748
2008195	13	0.0202214062558597	0.0377756386676226
2008195	14	0.0196576674182023	0.0329952866011052
2008195	15	0.0184014912240039	0.0295583640189397
2008195	16	0.0167702693814903	0.0269780825893069
2008195	17	0.0157795413781812	0.0256277142726034
2008195	18	0.0163005543595667	0.0262862541381683
2008195	19	0.0155922485113507	0.0243916415358566
2008195	20	0.015173850717579	0.024050442897056
2008195	21	0.0155038816330482	0.0253929118248485
2008195	22	0.0155338209442386	0.025577293817843
2008195	23	0.0162302853075324	0.0266723689946953
2008196	0	0.0179601474265756	0.0312198248687098
2008196	1	0.0207217078229142	0.0369562823543984
2008196	2	0.0227449115078162	0.0406972199593227
2008196	3	0.0288965933511202	0.0566176492049317
2008196	4	0.0383156449584045	0.0899514812207762
2008196	5	0.0650625526766326	0.239265279558786
2008196	6	0.126528505610173	0.576133256441211
2008196	7	0.131536019732017	0.571015046962276
2008196	8	0.135547275404826	0.603668536536352
2008196	9	0.112078942111136	0.455120358416091
2008196	10	0.0934862772824942	0.363046913805324
2008196	11	0.0838187089743214	0.319630930119888
2008196	12	0.0741819732314885	0.25307419213992
2008196	13	0.0636050292789504	0.197445233848605
2008196	14	0.0516977425029485	0.152600877403961
2008196	15	0.0416357972992189	0.118113141429224
2008196	16	0.0347190002245303	0.0943614976913686
2008196	17	0.0320117628059784	0.0802483057444582
2008196	18	0.0336378889393288	0.0698706992904022
2008196	19	0.0322780754613205	0.0534403277917787
2008196	20	0.0307316463655651	0.046601834328488
2008196	21	0.0301301386476606	0.0455167947772966
2008196	22	0.03555516024741	0.0580141032643979
2008196	23	0.0388325760070882	0.0783360703462114
2008197	0	0.0381781801851122	0.103259034129846
2008197	1	0.0430741065696361	0.146140072462297
2008197	2	0.0881001655881055	0.3351298568035
2008197	3	0.119092268057058	0.445090277135741
2008197	4	0.119423162625503	0.474276102905022
2008197	5	0.121512394798099	0.513981031377042
2008197	6	0.1304049892585	0.59489740063599
2008197	7	0.124746264893741	0.575197793773827
2008197	8	0.09849097810606	0.454841221777521
2008197	9	0.0815851522681893	0.334351817580928
2008197	10	0.0854664911057107	0.295414973660421
2008197	11	0.0880091552535214	0.246767492760064
2008197	12	0.0799719406837686	0.198742419293003
2008197	13	0.0666128642637525	0.150751566074973
2008197	14	0.0538014319144733	0.113697344341389
2008197	15	0.0426731472139367	0.086985638003685
2008197	16	0.0328262341317549	0.0645386208282288
2008197	17	0.0264854720918128	0.04905152782993
2008197	18	0.0263853797272696	0.0453776686786392
2008197	19	0.0241616157030625	0.0403825105804899
2008197	20	0.0165078336558645	0.0290255280885349
2008197	21	0.013880701104934	0.0247247399092535
2008197	22	0.0141093368107883	0.0241584553373261
2008197	23	0.0162828655542445	0.0270866214301408
2008198	0	0.0191842878420648	0.0423325558711503
2008198	1	0.0192599122554694	0.0632656625528501
2008198	2	0.0173363025670588	0.0742066755767971
2008198	3	0.0149809353216655	0.0723646988592088
2008198	4	0.0152025055992949	0.0718124733082516
2008198	5	0.0141936982908415	0.0705528732050234
2008198	6	0.0204131046331888	0.101379552269468
2008198	7	0.0250439772927181	0.10672182252298
2008198	8	0.0233936458738166	0.092830960678735
2008198	9	0.0151183578695663	0.0654100272315054
2008198	10	0.00675103674733167	0.0344545528367667
2008198	11	0.00171945018840596	0.0126057641817705
2008198	12	0.00702428096645275	0.0504017182209303
2008198	13	0.0657494855451602	0.288835746601919
2008198	14	0.0803827965321798	0.291592227274831
2008198	15	0.0749250007719914	0.245484468119895
2008198	16	0.0784322818764892	0.242767591124411
2008198	17	0.0864075251900437	0.26534754979007
2008198	18	0.0887776594496129	0.268746770933497
2008198	19	0.0866779562560216	0.238352759289855
2008198	20	0.0835542492351827	0.223235408914489
2008198	21	0.0996298179375262	0.283541484174747
2008198	22	0.144740546847942	0.432741667470177
2008198	23	0.172735443303532	0.507289483061733
2008199	0	0.170927941181235	0.523683556709864
2008199	1	0.165105719008762	0.613014219855392
2008199	2	0.153335989061565	0.702194763931796
2008199	3	0.185401598673509	0.705529760623622
2008199	4	0.137516603742632	0.261018366294532
2008199	5	0.118470412043473	0.183757404450441
2008199	6	0.115137527433291	0.203953906748156
2008199	7	0.150239441111517	0.59846810017895
2008199	8	0.161727681188987	0.734351750283786
2008199	9	0.139290907932387	0.581152020745433
2008199	10	0.0924184150607765	0.418613220261737
2008199	11	0.06617777439095	0.299549064504694
2008199	12	0.0502336876238976	0.212221529734101
2008199	13	0.041937648587393	0.146164863343643
2008199	14	0.0293065927016838	0.0832770788288271
2008199	15	0.0232046137581298	0.0551711003644382
2008199	16	0.0225545539601043	0.0489001026818275
2008199	17	0.0325201110551434	0.0758572282172568
2008199	18	0.0370967371725313	0.0836327952667239
2008199	19	0.0337275499624802	0.0717815965293621
2008199	20	0.0271603568214778	0.0574012885089988
2008199	21	0.0185460179071367	0.0420449582735776
2008199	22	0.0139778737049711	0.0414863275280731
2008199	23	0.0156467064377723	0.065289657203849
2008200	0	0.0235804526483947	0.0767768918067232
2008200	1	0.0324564440017569	0.0787620915013474
2008200	2	0.0400645030896651	0.0759983259971673
2008200	3	0.0426978584305169	0.0707803602854113
2008200	4	0.043229035639797	0.0675799512323716
2008200	5	0.0429971184806548	0.0614598837303893
2008200	6	0.0255737259508029	0.0382246117957146
2008200	7	0.00684283232529476	0.0164724648995237
2008200	8	0.00497863900999957	0.0166905470097975
2008200	9	0.00438685459488827	0.0124329341460986
2008200	10	0.0039955066008872	0.00763634522185935
2008200	11	0.00560586764914399	0.00892157065534773
2008200	12	0.00662985726130534	0.0101709245328088
2008200	13	0.00717918592091422	0.0118213754550764
2008200	14	0.00863344819498981	0.0169751527144753
2008200	15	0.0138019700112435	0.0325033213586016
2008200	16	0.0222390493408714	0.0551862427781202
2008200	17	0.0243721599766181	0.0587043728122075
2008200	18	0.0225921483484786	0.0551456537216816
2008200	19	0.0215676096955228	0.0573761478399846
2008200	20	0.0213778990428587	0.0666665548633504
2008200	21	0.0235122960118026	0.0836977858805026
2008200	22	0.0213213766292703	0.0827713708248234
2008200	23	0.017378354925298	0.0791439888647651
2008201	0	0.0140175321307164	0.0833948545471268
2008201	1	0.0132947104159791	0.0892098403315003
2008201	2	0.0147703269006545	0.0892753952396072
2008201	3	0.0148828312699262	0.0613211731638215
2008201	4	0.0147983518568465	0.0503412324256309
2008201	5	0.0159735382040356	0.0441317430598509
2008201	6	0.0181773015102774	0.0374709663345656
2008201	7	0.021166726637655	0.0336015861251218
2008201	8	0.0199067992025346	0.0310455209272493
2008201	9	0.0195059684069097	0.0599041529424985
2008201	10	0.0188410279898675	0.0620475855293951
2008201	11	0.0251782412781968	0.0779507578803555
2008201	12	0.0188536669716986	0.0633159685566747
2008201	13	0.00703342575587518	0.0410656064097125
2008201	14	0.0146627549358625	0.0912132341960658
2008201	15	0.0314316173820389	0.167791200370914
2008201	16	0.0481532848491868	0.259911579036015
2008201	17	0.0559793975680021	0.297872491960128
2008201	18	0.0545020931723706	0.280794145721521
2008201	19	0.0504969508958604	0.256169993005396
2008201	20	0.0465137886079801	0.213854771759142
2008201	21	0.0342592267776285	0.164279175983214
2008201	22	0.0314672124164912	0.231361210341811
2008201	23	0.047657275871704	0.39879113453148
2008202	0	0.0475791061143177	0.402489324434358
2008202	1	0.0450456720926821	0.415896813527895
2008202	2	0.0434145762109578	0.397568918618581
2008202	3	0.0257656547582244	0.271117078253598
2008202	4	0.0147173653315639	0.202998029972574
2008202	5	0.0263716224258767	0.402138479064769
2008202	6	0.0419897337096742	0.576687204154067
2008202	7	0.0450670814047534	0.563334181445789
2008202	8	0.0473399092097982	0.536166817472029
2008202	9	0.0503263129583911	0.443263170337312
2008202	10	0.0494602957369332	0.353616498286694
2008202	11	0.0593202026663284	0.362204529069015
2008202	12	0.0742842848465817	0.38288890852973
2008202	13	0.0782915977820438	0.347763903715686
2008202	14	0.075721006433576	0.301337374261673
2008202	15	0.0805656380758426	0.370890025531719
2008202	16	0.0699681049046546	0.365060298499954
2008202	17	0.0575063052820112	0.3117524186821
2008202	18	0.0721650690932813	0.50519868310928
2008202	19	0.125265394962922	0.866627024201868
2008202	20	0.144290934746051	0.951589758256096
2008202	21	0.149115644777436	0.960455320733528
2008202	22	0.140764578613243	0.952579957327518
2008202	23	0.155198541110671	1.11927839796224
2008203	0	0.161673641775278	1.20256961708679
2008203	1	0.171686760285465	1.35677925728031
2008203	2	0.180620831027039	1.33704594009389
2008203	3	0.205665608661095	1.61000224628251
2008203	4	0.25850479224064	2.26326273108007
2008203	5	0.331346358538915	2.63854071533603
2008203	6	0.309818609289839	2.54982701574159
2008203	7	0.140952962267884	1.08072975848938
2008203	8	0.016789324706416	0.119841926902776
2008203	9	0.00390040470789759	0.0403949549079679
2008203	10	0.014125508836314	0.177838916890593
2008203	11	0.0291492216582765	0.340182651018763
2008203	12	0.0315304735909125	0.356054497094208
2008203	13	0.022565396469332	0.285802484780619
2008203	14	0.0372775040483526	0.506759836780964
2008203	15	0.0566547185405666	0.791905288167338
2008203	16	0.0710882805187488	0.872428130489323
2008203	17	0.0895519412115674	0.901464569318638
2008203	18	0.0902747671411657	0.805548617417894
2008203	19	0.0524372425893928	0.473342779730838
2008203	20	0.0203624585966343	0.183336489231042
2008203	21	0.0206974640097961	0.192735387085641
2008203	22	0.0261703357934378	0.301438779175496
2008203	23	0.0273515664907745	0.34932457978786
2008204	0	0.0292843110639382	0.366828559961843
2008204	1	0.0313057701616769	0.383158939095274
2008204	2	0.0326278195979613	0.379020983147961
2008204	3	0.0300347019178546	0.354778959362833
2008204	4	0.0295321689903355	0.346084040230575
2008204	5	0.0280074406760194	0.319065806305283
2008204	6	0.0258904551671427	0.269709629401301
2008204	7	0.0265413396765627	0.254354255879108
2008204	8	0.0282347262687299	0.249160001395234
2008204	9	0.030686188063586	0.243822501552097
2008204	10	0.0354695485082344	0.229427299250178
2008204	11	0.0373482032546284	0.188918945575397
2008204	12	0.0424177007987567	0.168472973807214
2008204	13	0.0932758466520459	0.299691482597487
2008204	14	0.16587247287235	0.54237872804182
2008204	15	0.181462991074239	0.649354480216937
2008204	16	0.17717042457674	0.653135156665184
2008204	17	0.175561291998299	0.623402639538799
2008204	18	0.164309840928893	0.566518755241387
2008204	19	0.146225307198177	0.476454387258048
2008204	20	0.130145486417709	0.354205211214089
2008204	21	0.119088548885022	0.251200326531736
2008204	22	0.098323264113902	0.183347335079301
2008204	23	0.0901841798360101	0.172418107132487
2008205	0	0.0807604175553882	0.154017885534238
2008205	1	0.071699648094937	0.140133073032413
2008205	2	0.0667786874433858	0.152867515754546
2008205	3	0.0720080073327879	0.192081167382186
2008205	4	0.0819272469012196	0.228748120730337
2008205	5	0.088446327237543	0.265751157743461
2008205	6	0.0993844985792786	0.395430593997628
2008205	7	0.154942505406035	0.976914804785178
2008205	8	0.119738219557378	0.65655546367741
2008205	9	0.092984701846593	0.449108718314306
2008205	10	0.0975652217196338	0.409631388676006
2008205	11	0.0989697794708585	0.373964062273809
2008205	12	0.100472904061919	0.34819212137371
2008205	13	0.101003895381711	0.326810033342761
2008205	14	0.103412672498834	0.316657429600725
2008205	15	0.104841531539493	0.311148386552467
2008205	16	0.103887137269339	0.31077205196732
2008205	17	0.102077629991301	0.325379825693166
2008205	18	0.105586922289036	0.366846207054481
2008205	19	0.103404709994023	0.444908907436627
2008205	20	0.105293306370343	0.502166543525979
2008205	21	0.108231677380961	0.498837590063056
2008205	22	0.0932795803137358	0.406605309550094
2008205	23	0.0799722469281955	0.401360154593447
2008206	0	0.0737559567657989	0.504132382375949
2008206	1	0.0693684169536214	0.552794525806069
2008206	2	0.0710460620839135	0.572581546689312
2008206	3	0.0733609932850566	0.591197342150552
2008206	4	0.0786837302930982	0.627448919573077
2008206	5	0.100155024410447	0.706508426760874
2008206	6	0.14140575392127	0.637521669462376
2008206	7	0.142025391791408	0.452221565249544
2008206	8	0.116437753832655	0.294420112899076
2008206	9	0.0825470925916613	0.194205644419433
2008206	10	0.0590403463744161	0.134014112251344
2008206	11	0.0426139414656763	0.0963200184822127
2008206	12	0.0242688998045821	0.0610494401086074
2008206	13	0.0164589379163546	0.0398518395664567
2008206	14	0.0138402452166331	0.0336253926913328
2008206	15	0.0135406633191357	0.0327956170133524
2008206	16	0.0145139948440342	0.0367245298635011
2008206	17	0.0190198542230804	0.0471443602344673
2008206	18	0.0267380050596285	0.0647646756165804
2008206	19	0.0321856136024646	0.0918443052403624
2008206	20	0.038955838405289	0.121578463488826
2008206	21	0.0450098026985358	0.141574975516142
2008206	22	0.0539016842712726	0.153788443603988
2008206	23	0.0618312460799935	0.15056829599302
2008207	0	0.0622621985509722	0.126594651637719
2008207	1	0.0551523873636669	0.0906445831805865
2008207	2	0.0543392361610719	0.0803825022760058
2008207	3	0.0556993685368375	0.0792738304202391
2008207	4	0.0579710446032982	0.0802369974687008
2008207	5	0.0608515626404169	0.0802142854722426
2008207	6	0.0614733362404297	0.0760077253127999
2008207	7	0.0582859989615941	0.0686520269770511
2008207	8	0.0456489182786491	0.051869906833631
2008207	9	0.0374806279192053	0.0415356410979585
2008207	10	0.0370631384666735	0.0416580282764989
2008207	11	0.0466946414594454	0.0541531973756452
2008207	12	0.0572407630697874	0.0655391397747057
2008207	13	0.0566695689853391	0.0650698850475809
2008207	14	0.047788583099134	0.0573353650455489
2008207	15	0.031977044218794	0.0398913562589676
2008207	16	0.0222917504064674	0.029896853381165
2008207	17	0.0188951637849326	0.0268852558914876
2008207	18	0.0196154672990053	0.0288719689421122
2008207	19	0.0270353482013722	0.0398996889733266
2008207	20	0.0332156510905688	0.0509742296263822
2008207	21	0.0336281360300619	0.0539130520580746
2008207	22	0.033227958235036	0.0556992199235953
2008207	23	0.0324622280982132	0.0539405668877669
2008208	0	0.0282708554671752	0.0431077558178066
2008208	1	0.0221102486378542	0.0288226620907439
2008208	2	0.0188556537160891	0.0231381080346272
2008208	3	0.0182289072750136	0.0222241902995707
2008208	4	0.0187154094399176	0.0226887891738462
2008208	5	0.0195860161488177	0.0234468855781647
2008208	6	0.0204916087985779	0.0240051714907483
2008208	7	0.0197616864856888	0.022822406454065
2008208	8	0.0175766296360176	0.0200886821172198
2008208	9	0.0156765683481921	0.017872393323059
2008208	10	0.012680628602705	0.0143388000189115
2008208	11	0.010768307227134	0.0118594460249044
2008208	12	0.00956078554940989	0.0103396909124306
2008208	13	0.00924358210833851	0.00997970756481502
2008208	14	0.00909122349351735	0.00989381815241892
2008208	15	0.00912616604460203	0.00989803530106748
2008208	16	0.00919894200370731	0.00998840157109524
2008208	17	0.00957845873552383	0.0105063411593636
2008208	18	0.0108517186387954	0.0123509995118384
2008208	19	0.0143250107293018	0.0184823762748932
2008208	20	0.0193901888171031	0.0285390264986352
2008208	21	0.0230734489327969	0.0354723140965858
2008208	22	0.023585509583785	0.0352809642819666
2008208	23	0.020300531531739	0.0277107762010489
2008209	0	0.0156536758339835	0.0181743052623469
2008209	1	0.0132990825743464	0.0142520615085629
2008209	2	0.0126772522590971	0.0133861619236956
2008209	3	0.0126490579139642	0.0133148470199048
2008209	4	0.0132916937800014	0.0139668485478246
2008209	5	0.0140816468719876	0.0147017859791983
2008209	6	0.0148264174648307	0.0153277507305402
2008209	7	0.0153558798537816	0.0157674928386172
2008209	8	0.0151801173368543	0.015541621009906
2008209	9	0.0136349203388612	0.0139903357369286
2008209	10	0.0125769194325163	0.0131743817967702
2008209	11	0.0124856676950048	0.0140320527868476
2008209	12	0.0120885528623664	0.0145722417037026
2008209	13	0.0112334691959705	0.012941107616457
2008209	14	0.0104276351625006	0.0114937679690732
2008209	15	0.0102332083262334	0.0107358338215327
2008209	16	0.0104483898874769	0.0107868528829561
2008209	17	0.0103277495587959	0.0106230094716514
2008209	18	0.0100923396009036	0.0105238252480773
2008209	19	0.00906627892414258	0.00960038714651604
2008209	20	0.00735358478971989	0.00777134322523789
2008209	21	0.00619453547618763	0.00649615202553217
2008209	22	0.00578536337666623	0.00603756516584268
2008209	23	0.00509903057502287	0.00532241192840545
2008210	0	0.00478844523358143	0.00499465622395446
2008210	1	0.00480860725399357	0.00498071005471259
2008210	2	0.00501882824663292	0.00517477568445334
2008210	3	0.00526855713069124	0.00541974121956122
2008210	4	0.00539570898192835	0.00556666762694175
2008210	5	0.00581888630416001	0.00606800223764035
2008210	6	0.00677613942519289	0.00706001329114074
2008210	7	0.00752275380664617	0.00780802686149178
2008210	8	0.00777864720120979	0.00807707566081238
2008210	9	0.00766434336133843	0.00805442553161218
2008210	10	0.00741479998147409	0.00796162849851588
2008210	11	0.00698376253535442	0.00766550864724126
2008210	12	0.00651893112112358	0.00735194327686694
2008210	13	0.00628532657767011	0.0076009007065238
2008210	14	0.00648080113763835	0.00833532027537143
2008210	15	0.00686982655329945	0.00900358038880793
2008210	16	0.00738116311652705	0.00959100473902813
2008210	17	0.00799198864486372	0.0100937304629897
2008210	18	0.00902827431931356	0.0111556588926126
2008210	19	0.0104646816287014	0.0127491487521373
2008210	20	0.0118081986284991	0.0137844590327409
2008210	21	0.0115195810472393	0.0131643356704865
2008210	22	0.0104131361438271	0.0116515638478164
2008210	23	0.00861478566609304	0.0094792694408904
2008211	0	0.00697963577101476	0.00770680404152186
2008211	1	0.00580532937567557	0.00637415900726349
2008211	2	0.00518918331754161	0.0056116339325634
2008211	3	0.00497744915056689	0.00533361630923305
2008211	4	0.00476331882762694	0.00508987255643919
2008211	5	0.00457518250547157	0.00487235135352453
2008211	6	0.00447256750282061	0.00477216788927713
2008211	7	0.00455234730892642	0.00485912727189345
2008211	8	0.00478438051329933	0.00522007688402505
2008211	9	0.00513025000230213	0.00576989639605325
2008211	10	0.00559233235087416	0.00669825196429696
2008211	11	0.00583984357776197	0.00723631723589451
2008211	12	0.00585321450758769	0.0073097233381184
2008211	13	0.00600532034744537	0.00790157405444388
2008211	14	0.00623019687538448	0.00878865239184374
2008211	15	0.00668979757563305	0.00997242319793393
2008211	16	0.00706280328694853	0.0108638163730449
2008211	17	0.00693784984662498	0.0103359622309478
2008211	18	0.0066115966979663	0.00921149647819295
2008211	19	0.00623794508022635	0.00797784701211541
2008211	20	0.00599499559743099	0.00719955214793291
2008211	21	0.00600033141400921	0.00719168198828573
2008211	22	0.00641261635579842	0.00793760172716177
2008211	23	0.00670799676480593	0.00818924001778132
2008212	0	0.00630759622584618	0.00720931786905407
2008212	1	0.00574899547579764	0.00626696317655227
2008212	2	0.00512581603143856	0.00549923461164474
2008212	3	0.00472473027713458	0.00506377901275116
2008212	4	0.00451167662134446	0.00483105385443064
2008212	5	0.00438813536731939	0.00466772099935909
2008212	6	0.00425572220517751	0.0044946902451938
2008212	7	0.00409050579922116	0.00430447672129847
2008212	8	0.00391656580132481	0.00412548498970641
2008212	9	0.00377726472599427	0.00405629481381156
2008212	10	0.0037524982934165	0.00435468937937873
2008212	11	0.00390582318874181	0.00503633753432489
2008212	12	0.00412268348488382	0.00558004706674516
2008212	13	0.00407866482861226	0.00553516281826996
2008212	14	0.00459807884591496	0.00757102115979494
2008212	15	0.00506908973447778	0.00909444850568345
2008212	16	0.00483019653712931	0.00841948448501805
2008212	17	0.00420412614769683	0.00684752521108952
2008212	18	0.00374085922567449	0.00530392659175522
2008212	19	0.00353291679954185	0.00430431970154201
2008212	20	0.00355294619464457	0.00407888684452724
2008212	21	0.00394319131602416	0.00446732341842259
2008212	22	0.00435195365607327	0.00492084484844149
2008212	23	0.00447727723602484	0.00513814480987099
2008213	0	0.00449397997683771	0.00527746048084571
2008213	1	0.0044246546937628	0.00519411280239873
2008213	2	0.00428351142786234	0.00489565179708946
2008213	3	0.00395413612272108	0.00439626138282956
2008213	4	0.00359863100929843	0.00392584671889891
2008213	5	0.00334354468616675	0.00358414971735629
2008213	6	0.00315606943439997	0.00336660713965923
2008213	7	0.00302770396500232	0.00324169499323962
2008213	8	0.00300050787964312	0.00330650805030237
2008213	9	0.0029790922002794	0.00344138572249426
2008213	10	0.0033742538150704	0.00428328002583762
2008213	11	0.00363090093285693	0.00481179976155698
2008213	12	0.00360254187299361	0.00481916535024382
2008213	13	0.00348363844627475	0.00464139425825356
2008213	14	0.0033997944031662	0.00452862474932772
2008213	15	0.00330224132073592	0.00433771336057241
2008213	16	0.00323485482054688	0.00416968493287608
2008213	17	0.00319647808692523	0.00405889610624589
2008213	18	0.00319920374675497	0.00404322488499713
2008213	19	0.00322302306292062	0.00397609131562465
2008213	20	0.00320729465381468	0.00385925266500242
2008213	21	0.0030622719812886	0.00358884638109622
2008213	22	0.00279193805920008	0.00322590560325124
2008213	23	0.00251499799206853	0.002821738814057
2008214	0	0.00232198256773851	0.00254660334145819
2008214	1	0.00225370895497448	0.00246163054571156
2008214	2	0.00220329789539011	0.00239843655462299
2008214	3	0.00214289347205952	0.00233009400130255
2008214	4	0.0020880392100307	0.00225748790786838
2008214	5	0.0020399491606119	0.00219309992499916
2008214	6	0.00200055384195437	0.00215200896776786
2008214	7	0.00211985536374691	0.00237480554951842
2008214	8	0.00226535401493251	0.00270560108940762
2008214	9	0.00252946581982131	0.00338860136947507
2008214	10	0.00277392797474369	0.00423401644112055
2008214	11	0.00363560303337328	0.00672473742247021
2008214	12	0.0037470968981837	0.00727501596312123
2008214	13	0.00316816486288494	0.00594868159587024
2008214	14	0.0029737423696245	0.00533933167270627
2008214	15	0.00298033447276953	0.00527318677303023
2008214	16	0.00333117895738508	0.00608886671891165
2008214	17	0.00368402138871178	0.00710298434267329
2008214	18	0.00412824935392382	0.00820633777966286
2008214	19	0.00473348471943864	0.00989789155503153
2008214	20	0.00520087975753483	0.0114863155249199
2008214	21	0.00495051173969106	0.012985480660619
2008214	22	0.00808465295025437	0.0330539081342893
2008214	23	0.0215891201031936	0.104638002762645
2008215	0	0.0238670038443465	0.114227362019115
2008215	1	0.0244097920492942	0.104278714865858
2008215	2	0.0307356282955988	0.127189086268401
2008215	3	0.054306349675995	0.253229941075306
2008215	4	0.0757938628770595	0.353260598002868
2008215	5	0.0775242344093878	0.331938754761342
2008215	6	0.0812592935778086	0.383877520075038
2008215	7	0.0891538408761399	0.527523605959518
2008215	8	0.0936931407895118	0.643600929156891
2008215	9	0.0884986621159053	0.613841504262149
2008215	10	0.0824831840056639	0.567154772549525
2008215	11	0.0757933493699777	0.514753022674584
2008215	12	0.0749219231294522	0.509615327331588
2008215	13	0.082248926336692	0.547826525062903
2008215	14	0.0835437747794289	0.51191475474809
2008215	15	0.0775929117375547	0.402383532863434
2008215	16	0.0672693430782807	0.296630771348745
2008215	17	0.0613294834781221	0.241955651711864
2008215	18	0.0572501682182054	0.199865447152008
2008215	19	0.0563619532544799	0.173503267947695
2008215	20	0.056696912057078	0.151778125814882
2008215	21	0.0552324480636265	0.130220067131395
2008215	22	0.053499195803696	0.118045934929797
2008215	23	0.0544958819937119	0.105723192908809
2008216	0	0.0474247771486402	0.0800073364735659
2008216	1	0.0429767412195831	0.0681723246505513
2008216	2	0.0375158956944612	0.0585963982065834
2008216	3	0.0320391346675955	0.0504313347275408
2008216	4	0.0277954729809109	0.0434940162808498
2008216	5	0.0254245450581504	0.0378650095809931
2008216	6	0.0267403663104076	0.036840865653589
2008216	7	0.0306369418693959	0.0423269177203775
2008216	8	0.0345196428611716	0.0536590810833339
2008216	9	0.0422276557821749	0.104313845962145
2008216	10	0.04329620094743	0.129128421244182
2008216	11	0.0413440486426883	0.118614490431321
2008216	12	0.0299772455241314	0.10163790022449
2008216	13	0.0247120850143005	0.10045061104945
2008216	14	0.0225908337113519	0.090669410232769
2008216	15	0.0210854094648002	0.0752911454811661
2008216	16	0.0212685415659439	0.0636525504201054
2008216	17	0.0237637011599315	0.0574439857548092
2008216	18	0.0246027708248778	0.0459066289251609
2008216	19	0.0196374437778867	0.031324382538029
2008216	20	0.0142888916348689	0.0253043704307984
2008216	21	0.00994443039926998	0.0269580649006816
2008216	22	0.00253126958025115	0.00788842109625663
2008216	23	0.000112309765034841	0.000329759749942337
2008217	0	1.97184175556579e-05	6.17587501307958e-05
2008217	1	2.85385981227331e-05	0.000121533125845972
2008217	2	8.11353129972126e-05	0.000436098911967728
2008217	3	0.000720026576265578	0.00517565749826298
2008217	4	0.00459005742468831	0.0403113648855444
2008217	5	0.0106066303322676	0.0852939875323472
2008217	6	0.0150303999779147	0.113961479360146
2008217	7	0.0166020362761224	0.124461728784132
2008217	8	0.0165437916303645	0.124952844459687
2008217	9	0.0193961983545734	0.145597453594907
2008217	10	0.0195516637002951	0.148221294822447
2008217	11	0.0138561724696971	0.104278179978975
2008217	12	0.00617260751858171	0.0409631183626814
2008217	13	0.00467464799041669	0.0278979132483968
2008217	14	0.00742829180336132	0.0556797036419277
2008217	15	0.00720995542696812	0.052999704584677
2008217	16	0.0190134201832987	0.142900466635516
2008217	17	0.0331387459969419	0.279843460262054
2008217	18	0.0355919611795144	0.327347694754898
2008217	19	0.039358877078759	0.370294409893346
2008217	20	0.0377135605976038	0.344188003532259
2008217	21	0.0365968996995372	0.32611298192925
2008217	22	0.0353617807729944	0.354813492889039
2008217	23	0.0332329307606372	0.418681519956946
2008218	0	0.0352877598838875	0.506071638954706
2008218	1	0.0411759106547078	0.638678062746847
2008218	2	0.046199538715216	0.74427394822426
2008218	3	0.0488551571577152	0.763855491285448
2008218	4	0.0515692111625592	0.702565419933731
2008218	5	0.0606462641461545	0.710210633981897
2008218	6	0.0777484842226839	0.768666363456877
2008218	7	0.0889040970838524	0.774714688639749
2008218	8	0.0909663806027597	0.75753150932229
2008218	9	0.0932964378716284	0.72854616060895
2008218	10	0.0917809371098584	0.638507218954238
2008218	11	0.0860727691129683	0.557081149172563
2008218	12	0.080592846060966	0.495195896937618
2008218	13	0.0737633197038088	0.423863019521812
2008218	14	0.0679550003749508	0.376878572859146
2008218	15	0.0672501907267682	0.365071900775029
2008218	16	0.0664549909838505	0.345386449891206
2008218	17	0.063721595844902	0.321082153559261
2008218	18	0.0605662043174202	0.294646704018988
2008218	19	0.0552860471578011	0.24980846478019
2008218	20	0.049649996486728	0.206331636099721
2008218	21	0.0433807552916957	0.162901309013774
2008218	22	0.0415762806201969	0.132714505078909
2008218	23	0.0368341289718681	0.0918598317750964
2008219	0	0.0319097030723505	0.0712720043970329
2008219	1	0.029170501256	0.0628053127343339
2008219	2	0.0269474604377005	0.055927893763394
2008219	3	0.0237191887587228	0.0501445025030997
2008219	4	0.0238216611220691	0.0521889794202557
2008219	5	0.0220198953219165	0.0470797270076867
2008219	6	0.0220477022951392	0.0465461506138863
2008219	7	0.0222511625715813	0.0514881305820698
2008219	8	0.0241778208681331	0.0644745486327957
2008219	9	0.0275724938024038	0.0729985752322332
2008219	10	0.0240324764619064	0.0622714728267351
2008219	11	0.0242113532876228	0.068873928861019
2008219	12	0.0234493014788618	0.0678992849848633
2008219	13	0.0232202552568174	0.0615147323833501
2008219	14	0.0224528322972089	0.0524270053087748
2008219	15	0.0236733181368053	0.054285022135425
2008219	16	0.0241445974329609	0.0566490828374814
2008219	17	0.0245295833361947	0.0565949810682178
2008219	18	0.0246719435559581	0.0537419553447947
2008219	19	0.024396212381931	0.0494357278327158
2008219	20	0.0233462144807846	0.0445197758628217
2008219	21	0.0221848447088145	0.0403828425738609
2008219	22	0.0209747623036666	0.0368151187041022
2008219	23	0.0199748049934796	0.0342617707741946
2008220	0	0.019183354162846	0.0327506582452299
2008220	1	0.0186164999369701	0.0316962619821404
2008220	2	0.0184665041252443	0.0316533460175055
2008220	3	0.0184239303871566	0.0324392967260528
2008220	4	0.0188432920317343	0.0347124166116644
2008220	5	0.018637424927557	0.0369225347572893
2008220	6	0.0238907613938689	0.0705237347801446
2008220	7	0.0286798892270741	0.0948895571005391
2008220	8	0.0273224396995726	0.0968815290559562
2008220	9	0.0232180995257819	0.0961513849467812
2008220	10	0.0186192774777655	0.0825821248574883
2008220	11	0.0152335718758888	0.0638898091812808
2008220	12	0.012800107376055	0.0462603870914487
2008220	13	0.010605011479984	0.0333192618184365
2008220	14	0.00825112580477483	0.0236396394422544
2008220	15	0.00717742680146364	0.0189466630020261
2008220	16	0.00677855914553655	0.0168280135668085
2008220	17	0.00618406719688752	0.0131721294519589
2008220	18	0.0041443859922549	0.00659206860519287
2008220	19	0.00349217599059429	0.00489162129904713
2008220	20	0.00325431358364955	0.00503797208149363
2008220	21	0.0031659812260947	0.00607213201225524
2008220	22	0.00296264088594663	0.0107119465018757
2008220	23	0.00400549720061249	0.01761761492254
2008221	0	0.00366302709319162	0.0113145880258361
2008221	1	0.0016228837455997	0.00467075669261162
2008221	2	0.00307690462201095	0.0320957223571279
2008221	3	0.00768724458592076	0.0688001572532209
2008221	4	0.0133469429854219	0.0958598252664385
2008221	5	0.0185725323028326	0.127680154141558
2008221	6	0.0282639559038512	0.199080088983304
2008221	7	0.0401937205552653	0.269227449380226
2008221	8	0.0488086597383436	0.282209335896843
2008221	9	0.0461240128127791	0.222305885811231
2008221	10	0.0398969435960572	0.166220435996976
2008221	11	0.0306704696639865	0.100480948237549
2008221	12	0.0196104282827945	0.0669010059429358
2008221	13	0.0177858107505596	0.0589396553589329
2008221	14	0.0274876664119029	0.102133737367079
2008221	15	0.0394046016672907	0.144467202781509
2008221	16	0.0343154264421838	0.160581153399707
2008221	17	0.0460007552643898	0.326726279282946
2008221	18	0.0533861494419378	0.460396337075849
2008221	19	0.0295744326719503	0.363865647506268
2008221	20	0.0398554408595836	0.587740119526336
2008221	21	0.126092778492564	1.54920603362621
2008221	22	0.252326181049081	2.66929580159908
2008221	23	0.276315977038772	2.97201177662307
2008222	0	0.288542808850439	3.11206499705863
2008222	1	0.320027733174234	3.26341155847814
2008222	2	0.329413566185268	3.21930008667995
2008222	3	0.320326761640743	3.09070969601064
2008222	4	0.309770241598841	2.88039252653795
2008222	5	0.290849153006282	2.55377259050699
2008222	6	0.244921719919486	2.05543456544969
2008222	7	0.197927994898146	1.56494947890931
2008222	8	0.179307160629988	1.41999632255277
2008222	9	0.173712564056394	1.38638700035347
2008222	10	0.157334802352689	1.22032973635016
2008222	11	0.140882583260841	1.08894129828013
2008222	12	0.11645635147856	0.845768737078364
2008222	13	0.104568112736834	0.62800710331483
2008222	14	0.0987297319105731	0.509754454033263
2008222	15	0.0888950271796586	0.412986390080992
2008222	16	0.0757973557187801	0.31403434936291
2008222	17	0.0692325688113441	0.250393921110814
2008222	18	0.0676984424710006	0.222901209920229
2008222	19	0.0704402602973934	0.200138655684598
2008222	20	0.07050643658747	0.161025230180443
2008222	21	0.0596444662761375	0.100253628156602
2008222	22	0.0387982721737578	0.0612923765208736
2008222	23	0.031815566250459	0.0489023488354735
2008223	0	0.0284381961516294	0.0409663559919254
2008223	1	0.0264559254397582	0.0365105870426005
2008223	2	0.0307983530393465	0.0427524911917903
2008223	3	0.0504840318883884	0.067381397656299
2008223	4	0.0594074170605215	0.0792608723470851
2008223	5	0.056770530355942	0.0748300150741238
2008223	6	0.0518570920109965	0.0722722633633073
2008223	7	0.0527052852635917	0.0792771843041519
2008223	8	0.0525291833001577	0.0788410315110381
2008223	9	0.0515467078186325	0.0748221416758232
2008223	10	0.0498520690966031	0.0707029983229413
2008223	11	0.0497076575549906	0.0690785448347047
2008223	12	0.0494610488522409	0.0668437276885938
2008223	13	0.044843918475786	0.0589644820888029
2008223	14	0.0386206490635233	0.0522413012907852
2008223	15	0.032591627709518	0.0488430332535251
2008223	16	0.0253120269760249	0.0433956096025057
2008223	17	0.0203403714035852	0.0376530987940092
2008223	18	0.0186203280337569	0.0332556601469706
2008223	19	0.0173223381878436	0.0291668438086782
2008223	20	0.017719890138313	0.0275069801775742
2008223	21	0.0181883806865652	0.0350690762592007
2008223	22	0.0262729561959273	0.219728261304768
2008223	23	0.0307132275947815	0.305563443291977
2008224	0	0.02951564337499	0.28112746988674
2008224	1	0.0277747334803584	0.203013690656774
2008224	2	0.0230140308377124	0.166085812911311
2008224	3	0.0203200876668177	0.139360946721056
2008224	4	0.0190308057807422	0.13578263688819
2008224	5	0.0282635128731209	0.229614547606299
2008224	6	0.0374562956887637	0.314094267503296
2008224	7	0.0590233557954517	0.500454193160434
2008224	8	0.0950993553766703	0.755766446622098
2008224	9	0.111322826231316	0.821725541666232
2008224	10	0.105783168056106	0.726566923645957
2008224	11	0.0968094900287516	0.583479914737376
2008224	12	0.0853104457967246	0.408713941992526
2008224	13	0.0748192872910384	0.286313244342724
2008224	14	0.0710368200588683	0.239770534310557
2008224	15	0.0678241956476613	0.193950740661108
2008224	16	0.0661023904470597	0.161156008834722
2008224	17	0.0665590858713568	0.137984533593564
2008224	18	0.0669403760667007	0.11273560109631
2008224	19	0.0633606542526789	0.0966924610040419
2008224	20	0.0623106467627648	0.093963337688168
2008224	21	0.0604401370237477	0.0947924330348455
2008224	22	0.0602897669198925	0.0999130091524968
2008224	23	0.0566265843403097	0.096471564992745
2008225	0	0.0497650202234576	0.0853235956555985
2008225	1	0.040481702587541	0.0682497094242146
2008225	2	0.0299787927709598	0.0483698700479082
2008225	3	0.0222182665176322	0.0348546254400239
2008225	4	0.01803513152643	0.0291274686080473
2008225	5	0.0160330374683764	0.0268748144805352
2008225	6	0.0132350193697908	0.0244544619600192
2008225	7	0.0129560825758789	0.0218540462377805
2008225	8	0.0126877011440189	0.0192438400035093
2008225	9	0.0124720112152221	0.018049647973971
2008225	10	0.0113375416424605	0.0155491131565599
2008225	11	0.0102172430294556	0.0136005167283373
2008225	12	0.00830234413940634	0.0117912619369581
2008225	13	0.00848240387629022	0.0192226953800654
2008225	14	0.00319027399321349	0.00873024341631829
2008225	15	0.00165904794176105	0.00489827836867432
2008225	16	0.00166608896008074	0.00693338358467381
2008225	17	0.00785697367410051	0.06966511712504
2008225	18	0.037133194926797	0.236357961005911
2008225	19	0.0442697305406242	0.233240949469597
2008225	20	0.0324517324067938	0.144118142830261
2008225	21	0.0223306423890858	0.0993051302973912
2008225	22	0.0218169232043541	0.0700355038309208
2008225	23	0.0262344673859197	0.0547734230147187
2008226	0	0.0336892265914076	0.0519344963143942
2008226	1	0.0446809894679051	0.0615162587220507
2008226	2	0.0665339388122941	0.0986706540742421
2008226	3	0.0921333927216343	0.142551194998015
2008226	4	0.0885443032701017	0.155076108470271
2008226	5	0.0596667531610815	0.173961443728236
2008226	6	0.0573458108618702	0.311503496743638
2008226	7	0.0984804400637303	0.677008354329784
2008226	8	0.156516962842379	0.928723057092919
2008226	9	0.179975772534081	0.751212753694569
2008226	10	0.174131619134215	0.576211853917838
2008226	11	0.157957123675543	0.521427957844244
2008226	12	0.144372276895268	0.556303487784312
2008226	13	0.130766736580084	0.605703032066007
2008226	14	0.126889038186379	0.571923953871991
2008226	15	0.118891329700957	0.548750595715426
2008226	16	0.112942168354912	0.606947952880661
2008226	17	0.112574779481146	0.548930865122409
2008226	18	0.114575063233152	0.501964997773101
2008226	19	0.128937387856986	0.604036178161144
2008226	20	0.163668216466224	0.717847233240506
2008226	21	0.179344492735086	0.673107250612386
2008226	22	0.178196493296141	0.63738470062766
2008226	23	0.178398850102296	0.59211759962035
2008227	0	0.192073819755412	0.629512267369766
2008227	1	0.210561558983383	0.69281031366529
2008227	2	0.182361528237705	0.612152454991849
2008227	3	0.173513715148133	0.756143790529536
2008227	4	0.195702051449692	1.06465153944103
2008227	5	0.222605731925181	1.38422879895937
2008227	6	0.24954640824926	1.57568955284999
2008227	7	0.269659376360991	1.50893313797289
2008227	8	0.260825275737754	1.23039285439952
2008227	9	0.251075985405826	1.47846939148222
2008227	10	0.242287947420431	1.67577982105611
2008227	11	0.223521342367345	1.43760285532271
2008227	12	0.199066456258617	1.10682835099846
2008227	13	0.181434300076221	0.929914475895866
2008227	14	0.177577534226209	1.02162876293499
2008227	15	0.166714407724437	0.939624971355706
2008227	16	0.146898738384292	0.73261434522533
2008227	17	0.123779582449657	0.528157034559145
2008227	18	0.10726611629857	0.370209790643528
2008227	19	0.11546889916513	0.269282459565228
2008227	20	0.0854929877257307	0.135903501299854
2008227	21	0.081155856182884	0.123801321783061
2008227	22	0.0766063862007566	0.115335684631863
2008227	23	0.0698927897639863	0.101718716143041
2008228	0	0.067217595569987	0.0963393665530268
2008228	1	0.066162560907754	0.0922117991323178
2008228	2	0.0646881152320725	0.0863452454401248
2008228	3	0.0635191260737061	0.0818584369472145
2008228	4	0.0621068778052896	0.0784521291360528
2008228	5	0.0607281169074438	0.0747496857121395
2008228	6	0.0593456788100179	0.0745254864074081
2008228	7	0.0581578330904642	0.0842172348662511
2008228	8	0.0684022621054834	0.149637984272211
2008228	9	0.0750993890076689	0.232957479948123
2008228	10	0.0766116304737854	0.332416587892018
2008228	11	0.072641935726826	0.358705089956284
2008228	12	0.0677266515482605	0.349127561333618
2008228	13	0.0635062614267102	0.331594502746648
2008228	14	0.0607757340142827	0.306481293312204
2008228	15	0.0577735529632838	0.281930394281901
2008228	16	0.0550595050542311	0.259557027641147
2008228	17	0.0612261375090258	0.255049301825702
2008228	18	0.0666088090872338	0.201687255504714
2008228	19	0.0566761437160727	0.147361736756102
2008228	20	0.0554279523873456	0.135480489993563
2008228	21	0.0545290756074222	0.126371621872419
2008228	22	0.0558455387786941	0.122877051763828
2008228	23	0.0532899289132496	0.108891218066313
2008229	0	0.0502030672678359	0.0974230656967372
2008229	1	0.0480107394553848	0.0908805295107988
2008229	2	0.0458353257532729	0.0862242783203876
2008229	3	0.0436180713835163	0.0831353700037141
2008229	4	0.0426511048061587	0.0818732532013511
2008229	5	0.0370735671398219	0.0816970047494424
2008229	6	0.0476189547177879	0.167893855452401
2008229	7	0.0549950549155328	0.227465940417709
2008229	8	0.0571313462837159	0.25978244972836
2008229	9	0.0600897301196875	0.273367287603562
2008229	10	0.0577242284474275	0.249404227472004
2008229	11	0.0568831078017699	0.236377217545539
2008229	12	0.0564341301437886	0.22364155483675
2008229	13	0.0557343535226933	0.208356025745673
2008229	14	0.0529601974481577	0.185404473571441
2008229	15	0.0496656307884059	0.1651393318018
2008229	16	0.0479052494257677	0.157273408645626
2008229	17	0.0466936281371615	0.156800647253784
2008229	18	0.0473841649550716	0.157317800583567
2008229	19	0.0462573929012798	0.14896415104345
2008229	20	0.0415249880387074	0.1249326941081
2008229	21	0.0396351353459586	0.102027472709298
2008229	22	0.0421546223726146	0.0900913081748103
2008229	23	0.0422408321385628	0.0801131773787773
2008230	0	0.0421371071125919	0.0837358473010336
2008230	1	0.0426721047278454	0.0954989101450735
2008230	2	0.0419831156821692	0.112889694222545
2008230	3	0.0418739329674329	0.14344306656717
2008230	4	0.0406812752157736	0.18941943835751
2008230	5	0.0450718905888788	0.279808991362474
2008230	6	0.0634440207639103	0.376766266448939
2008230	7	0.0704311942449791	0.346031604884285
2008230	8	0.0591001813741164	0.251676097396974
2008230	9	0.0590704666366928	0.267960859947779
2008230	10	0.0571546530568621	0.25117093759419
2008230	11	0.0550708284619582	0.225321177432608
2008230	12	0.0538223933909487	0.202697919813318
2008230	13	0.0535072241084797	0.187451630925185
2008230	14	0.0516629783754883	0.171091268295431
2008230	15	0.0500840034470285	0.155750955420051
2008230	16	0.0498674656768264	0.142524561992715
2008230	17	0.0516441585833037	0.137783464775198
2008230	18	0.0521883815432301	0.143387760227281
2008230	19	0.0520327194993619	0.151028694823721
2008230	20	0.0502894767357754	0.146391094206696
2008230	21	0.0482881135185394	0.138623772568848
2008230	22	0.0461148124097593	0.130619916039616
2008230	23	0.0436631449025913	0.122605771271508
2008231	0	0.0411981699138854	0.11512501469932
2008231	1	0.0372364469632454	0.109085472983084
2008231	2	0.0413614078810472	0.132315828052626
2008231	3	0.0374125790038673	0.122005500429067
2008231	4	0.0397128393549658	0.102473829976191
2008231	5	0.0184601133578213	0.0324752217262367
2008231	6	0.0130366606215836	0.0177652419941054
2008231	7	0.0241603549379501	0.0569597366713573
2008231	8	0.0326249405463675	0.122234212501161
2008231	9	0.0389568549390478	0.161505672870122
2008231	10	0.0622894047326743	0.268239842923927
2008231	11	0.0869135580246881	0.339468782516078
2008231	12	0.0865263615352863	0.278761973917955
2008231	13	0.0823072415660784	0.235213383949602
2008231	14	0.0790576626996243	0.207760428246606
2008231	15	0.0788365970414897	0.191671413679016
2008231	16	0.0788733706755597	0.176633906398409
2008231	17	0.0840370685195314	0.169014336698917
2008231	18	0.084761868262328	0.13710676062473
2008231	19	0.0815875208970094	0.114824116270175
2008231	20	0.0788132372333264	0.102097003139287
2008231	21	0.0780798957573231	0.0922581733799276
2008231	22	0.0795309589171479	0.0889956873964296
2008231	23	0.0780345456828193	0.0874126771789302
2008232	0	0.0768858234609432	0.08618189448993
2008232	1	0.0768026709363702	0.0857463146508508
2008232	2	0.0779598129178575	0.0865406311638638
2008232	3	0.079861429811974	0.0884671165899778
2008232	4	0.080662301839679	0.0894748902935208
2008232	5	0.0814371803894498	0.0912569918569304
2008232	6	0.0845588258511476	0.0995770969985145
2008232	7	0.0851101806556857	0.102251052962806
2008232	8	0.0775553166493891	0.107174007090238
2008232	9	0.0575734643920021	0.111200258580683
2008232	10	0.0415858984750936	0.0849991376873102
2008232	11	0.0381753295387265	0.0669141779324687
2008232	12	0.0360268848195499	0.0580444480591175
2008232	13	0.0275765116785541	0.0464864279092685
2008232	14	0.0189860474482302	0.040628386163642
2008232	15	0.0233172438123597	0.104046452003448
2008232	16	0.0289335721572975	0.138038108533632
2008232	17	0.0343526735231547	0.133079011353297
2008232	18	0.0432249580824843	0.136609650404317
2008232	19	0.0475422728058827	0.133595594048107
2008232	20	0.0518842150023891	0.147431118595123
2008232	21	0.0680140549373148	0.201181080293977
2008232	22	0.0936801634400482	0.254182125453002
2008232	23	0.100280091613395	0.292813405250186
2008233	0	0.0906651383373987	0.35659992845134
2008233	1	0.0904125688905009	0.427500912569962
2008233	2	0.102277157764731	0.462708091601599
2008233	3	0.13205520138968	0.519515979542051
2008233	4	0.126759697479007	0.358336362378991
2008233	5	0.0873897723949748	0.182727804420808
2008233	6	0.0815565512203295	0.200005249685815
2008233	7	0.0835116347692891	0.39323563179501
2008233	8	0.0810729504557008	0.547897672817754
2008233	9	0.0692178104319894	0.413789864769211
2008233	10	0.0478769828897847	0.267617598652084
2008233	11	0.0322013104065791	0.18893657468658
2008233	12	0.0285335101617542	0.158485748198339
2008233	13	0.0301261134766637	0.161077474537388
2008233	14	0.0333563856818418	0.159724888713784
2008233	15	0.0328040508883726	0.136949720749504
2008233	16	0.0320194489327736	0.117632706157943
2008233	17	0.0291245781244961	0.0996106180814152
2008233	18	0.020059719600452	0.0674052491658954
2008233	19	0.00912298469705148	0.0320879107607923
2008233	20	0.0106706168003311	0.0401339812277322
2008233	21	0.0180655990904913	0.0800620086647881
2008233	22	0.0266231382079833	0.14218038692201
2008233	23	0.0348503916236124	0.212814499717402
2008234	0	0.0381244719295804	0.22250940037832
2008234	1	0.0348114029581357	0.196918855377647
2008234	2	0.0354811787645811	0.20604857399233
2008234	3	0.0432838884855485	0.246754342265831
2008234	4	0.0541479025322166	0.300918786777433
2008234	5	0.0647443878757186	0.317529389055895
2008234	6	0.0752446615497519	0.271388742245708
2008234	7	0.0669694750224184	0.163478900970032
2008234	8	0.0672983420969723	0.13327963341918
2008234	9	0.0743481759428629	0.134476020566921
2008234	10	0.0791173355261186	0.136549717420822
2008234	11	0.0746744444158809	0.116730341514382
2008234	12	0.0709360676789946	0.117702969884976
2008234	13	0.072005467623205	0.166176698946513
2008234	14	0.0698407510185662	0.177859829051994
2008234	15	0.0635286806905647	0.153220485709919
2008234	16	0.0547349677521429	0.119420491723805
2008234	17	0.0383836045826288	0.0722665026249099
2008234	18	0.0259513712989935	0.0463489859914058
2008234	19	0.0224472855597133	0.0406423000368057
2008234	20	0.0224491388951677	0.0536076042107899
2008234	21	0.0212256487880797	0.0675751024100003
2008234	22	0.0214613159583827	0.1001421010118
2008234	23	0.0228646438815358	0.144705838609652
2008235	0	0.0228753103052769	0.148118263538274
2008235	1	0.0233185097132322	0.149165292682303
2008235	2	0.0305830216820473	0.201499650846096
2008235	3	0.0386156823851383	0.233513981582765
2008235	4	0.0352901466604889	0.176102582495948
2008235	5	0.0305962730365626	0.14753902077248
2008235	6	0.0348062484580116	0.173291729192629
2008235	7	0.0394749908233326	0.152377812421342
2008235	8	0.0380212034880568	0.0925257487349673
2008235	9	0.0292162753555211	0.0495085425402421
2008235	10	0.0301921293954135	0.055069863175921
2008235	11	0.0328031735046014	0.077444276122802
2008235	12	0.0221169950368562	0.0477761964254462
2008235	13	0.0113758151217909	0.0263327480956149
2008235	14	0.00675076064084772	0.0193591084843513
2008235	15	0.00534406169227196	0.01939677177603
2008235	16	0.00597163662142799	0.02678914700496
2008235	17	0.00792816939094139	0.040190193164871
2008235	18	0.00950545836451566	0.0515439709130422
2008235	19	0.0102646463677793	0.0601659992065683
2008235	20	0.0117867119486739	0.0680753876943734
2008235	21	0.0114594981772984	0.0592385834997214
2008235	22	0.0103394555684885	0.0566493144838619
2008235	23	0.00951424707595911	0.0505439266453157
2008236	0	0.014440400704641	0.0545333294044885
2008236	1	0.0382156072674209	0.102258800869871
2008236	2	0.0565658134057156	0.183119219440753
2008236	3	0.0595530876639871	0.249755237323161
2008236	4	0.0554654519450466	0.308822865683633
2008236	5	0.0525391562071512	0.330938283892408
2008236	6	0.0541331147497524	0.310256620102919
2008236	7	0.048989382045844	0.281720907050429
2008236	8	0.0305864087668471	0.231355702907439
2008236	9	0.02301229440748	0.232168563418591
2008236	10	0.0389006735659391	0.370056661617858
2008236	11	0.0303891041749926	0.270379319536266
2008236	12	0.0189828400600974	0.200323669850421
2008236	13	0.0194210090507992	0.218045577658825
2008236	14	0.0220277503962189	0.241925560024816
2008236	15	0.0236161921423492	0.254069975173304
2008236	16	0.0192009011848034	0.22566062321438
2008236	17	0.0248727447562921	0.230235296563752
2008236	18	0.0304587095781724	0.223024655663353
2008236	19	0.00751397287915604	0.0745762011826375
2008236	20	0.00359094535466177	0.040909060822983
2008236	21	0.0226303525339901	0.235094849817521
2008236	22	0.0551969909507274	0.455223081862617
2008236	23	0.0590989386820583	0.467656789912322
2008237	0	0.0477244551604388	0.353186644869684
2008237	1	0.035786062725466	0.285199574334206
2008237	2	0.0276487244596311	0.246284200670483
2008237	3	0.0216063318110343	0.214971296386589
2008237	4	0.0219167313467506	0.229604737609834
2008237	5	0.0270353145349352	0.244636990680832
2008237	6	0.035311808113803	0.281654231898608
2008237	7	0.0477856202811906	0.336174964332484
2008237	8	0.0628230287735791	0.35313060839451
2008237	9	0.0715935122695368	0.384906822031916
2008237	10	0.0722987958871276	0.418590144460222
2008237	11	0.073756209349219	0.445597039415879
2008237	12	0.0679712520719134	0.403913797162307
2008237	13	0.062333947486938	0.348056513218109
2008237	14	0.0539606510735594	0.252056597183859
2008237	15	0.0426751681635157	0.157153552056608
2008237	16	0.0294568453249081	0.0915019113639462
2008237	17	0.024240401648253	0.06985221238929
2008237	18	0.0252764253097338	0.0592859850927718
2008237	19	0.021722899881889	0.0420557063612164
2008237	20	0.0202287003540692	0.036528514621321
2008237	21	0.0190887603242702	0.0329399785887845
2008237	22	0.018765286976452	0.0303873171094769
2008237	23	0.0199840305482823	0.0298517148656741
2008238	0	0.0243063768492624	0.0341547802247599
2008238	1	0.0296489893406658	0.0433680579183985
2008238	2	0.0358081877693881	0.0611153135750924
2008238	3	0.0403278011085495	0.0814075113257617
2008238	4	0.0403185200387466	0.0865525025226338
2008238	5	0.0380266471283775	0.0806531444601545
2008238	6	0.0364042324466331	0.0752199572707489
2008238	7	0.0339977010115988	0.0712776677759316
2008238	8	0.0318834027328317	0.067406529536157
2008238	9	0.0302088037668608	0.0651853839757234
2008238	10	0.0320241272080251	0.0692940528108262
2008238	11	0.0336510402777102	0.0699890524662073
2008238	12	0.0342477690708902	0.0660394840072068
2008238	13	0.0280634639002709	0.052976128253116
2008238	14	0.0177291751744796	0.0437451099014261
2008238	15	0.0172208612257965	0.0714628409742839
2008238	16	0.0179962706436058	0.0832665779504245
2008238	17	0.0168404936630074	0.078525055115866
2008238	18	0.0183605962368569	0.0940410743358619
2008238	19	0.0193697924273619	0.0978544749457961
2008238	20	0.0220473506790192	0.104729405524275
2008238	21	0.0248144498735079	0.104575335230737
2008238	22	0.0300081435450733	0.101611218282946
2008238	23	0.0307899997866261	0.0724590428231162
2008239	0	0.0251590438774819	0.0461277263430012
2008239	1	0.0246219619546871	0.0441992235041241
2008239	2	0.0258758855302029	0.0504274991070578
2008239	3	0.0262696040164213	0.0582264622308843
2008239	4	0.0369629003516906	0.106368264527417
2008239	5	0.053355087446598	0.165148667867289
2008239	6	0.064271408788366	0.191469403143339
2008239	7	0.0802521852397146	0.20813286909207
2008239	8	0.0937732123001184	0.210922032204668
2008239	9	0.0805573335115135	0.18905012521143
2008239	10	0.0957476353894159	0.352921567745837
2008239	11	0.101272673096769	0.661298581536958
2008239	12	0.097526239902787	0.65158114365886
2008239	13	0.100036225072575	0.635138110183228
2008239	14	0.101580220665136	0.600598565664902
2008239	15	0.0967100105452607	0.531729577407486
2008239	16	0.0907496656119836	0.458909556155032
2008239	17	0.089188771467811	0.408935711955232
2008239	18	0.0905863252892647	0.359844801794324
2008239	19	0.101730094451459	0.339384390935831
2008239	20	0.112198126313145	0.278448309627414
2008239	21	0.105976178096978	0.226753139928943
2008239	22	0.113700539530214	0.243328059916925
2008239	23	0.116135969504879	0.246978679885521
2008240	0	0.11386836834042	0.232771986233062
2008240	1	0.112881606350975	0.230766627452832
2008240	2	0.1110230092662	0.238507337572773
2008240	3	0.108333701096356	0.250209113617927
2008240	4	0.103825931905216	0.267254330968939
2008240	5	0.107230215219592	0.292676441277041
2008240	6	0.116133270363228	0.306521893145753
2008240	7	0.115881293190629	0.314783167552308
2008240	8	0.136884084718241	0.422477458085269
2008240	9	0.115993182742508	0.384878039448113
2008240	10	0.0800266442208746	0.261484370773878
2008240	11	0.0604586104928482	0.186881620577682
2008240	12	0.0503077392931174	0.15159197612958
2008240	13	0.0480821315006293	0.142373455665032
2008240	14	0.0481599502314462	0.141934657878488
2008240	15	0.0532644205964365	0.147272733933516
2008240	16	0.0549486192193532	0.157251021002845
2008240	17	0.0566872235897178	0.174191297882464
2008240	18	0.0599083967548747	0.19061145443256
2008240	19	0.0613578979374554	0.1778592384832
2008240	20	0.0500220618590923	0.127264149436883
2008240	21	0.0427396230666982	0.0918568063690289
2008240	22	0.0393978151302709	0.0785533846024217
2008240	23	0.0352521725749252	0.0693160479053422
2008241	0	0.0324316869141879	0.0626956496666738
2008241	1	0.0309749784767213	0.0610349880565143
2008241	2	0.0320391992973038	0.0661584447565537
2008241	3	0.03516074741723	0.0724847232177825
2008241	4	0.0363404826677362	0.0734221060341014
2008241	5	0.0446601602965191	0.0958942948653837
2008241	6	0.0563424716583525	0.122784814867659
2008241	7	0.0672399698444671	0.138609733517427
2008241	8	0.07564775584486	0.148392801349443
2008241	9	0.0818117700715381	0.162762977826722
2008241	10	0.0827003930239599	0.171658800948728
2008241	11	0.0828282078591348	0.181510029956357
2008241	12	0.0842418035816907	0.192265686962342
2008241	13	0.0843765936789684	0.200303810933227
2008241	14	0.0855514248710697	0.200311892858516
2008241	15	0.0827326635693921	0.184460537270395
2008241	16	0.0809215122111586	0.184766523615718
2008241	17	0.0753866663140738	0.172771340450465
2008241	18	0.0651132936534852	0.175405991260933
2008241	19	0.0604060289970417	0.195844956726003
2008241	20	0.0608823856628066	0.191811064687215
2008241	21	0.0759668005700529	0.266599122345508
2008241	22	0.0817227008406441	0.304927569131364
2008241	23	0.0854781369453372	0.320712403100428
2008242	0	0.089970779080909	0.339236066191242
2008242	1	0.0928408898809294	0.364432902679266
2008242	2	0.107226135562937	0.439535910874103
2008242	3	0.111784308559716	0.486530257989811
2008242	4	0.085357850081421	0.402990975831777
2008242	5	0.0459795526332862	0.328951369985566
2008242	6	0.0339569938242556	0.267029478775084
2008242	7	0.0325037193092821	0.22583477387795
2008242	8	0.032520616550546	0.188415726539245
2008242	9	0.0411142148628921	0.200386750704411
2008242	10	0.0558795087310245	0.247161919639343
2008242	11	0.0640669152155362	0.260868621704661
2008242	12	0.0637973087230069	0.245850873012923
2008242	13	0.0582622767031421	0.222691128186542
2008242	14	0.0525965113325668	0.205436123197035
2008242	15	0.0518966856861772	0.201356830893664
2008242	16	0.0519022835981026	0.193848166279761
2008242	17	0.0530490221115891	0.183883457442257
2008242	18	0.0540609429998104	0.167470411310315
2008242	19	0.0554253339055252	0.149288030739488
2008242	20	0.0568841465257632	0.119093232383814
2008242	21	0.0522772613031168	0.0889009536839959
2008242	22	0.0499398940338276	0.0792341838499324
2008242	23	0.0479022497521111	0.073922171883794
2008243	0	0.0456618463332721	0.0693244210622688
2008243	1	0.0441174048532089	0.0658970276065116
2008243	2	0.0426963788344864	0.0627364250004768
2008243	3	0.041125143491457	0.0590418855887171
2008243	4	0.040019953749617	0.0564521094474413
2008243	5	0.039376307174634	0.0550010659290668
2008243	6	0.0357345536376883	0.0530599085249931
2008243	7	0.0601511647403812	0.273305288270783
2008243	8	0.0763188763963247	0.388252862716134
2008243	9	0.0848778854369371	0.44490474144483
2008243	10	0.0767312002828341	0.382649973560498
2008243	11	0.0713241545149682	0.326480315147994
2008243	12	0.0679336587740802	0.281718167815971
2008243	13	0.0658567853588845	0.248760281563644
2008243	14	0.0656617087521059	0.223322914665947
2008243	15	0.0670982725569861	0.202338619238404
2008243	16	0.067698714450232	0.187108019955288
2008243	17	0.0658367653540652	0.181825356261229
2008243	18	0.0648389684084069	0.180326182089948
2008243	19	0.0617781343386604	0.173277885649686
2008243	20	0.0562068894168262	0.164496297394859
2008243	21	0.0499766173589878	0.151452855659742
2008243	22	0.043637972751416	0.129651704844272
2008243	23	0.0369909613438879	0.10210631274197
