# Supplementary material for: A comparison of sea salt emission parameterizations in northwestern Europe using a chemistry transport model setup
Source: Copernicus journal article supplement (doi:10.5194/acp-16-9905-2016), 2016-08-08
Supplement: Supplementary file 2 [file acp-16-9905-2016-supplement.zip › conc/conc.timeseries.values.sum2008.base.Na.DE0044R.csv]

doy	hour	pm2.5	pm10
2008183	0	0.0310824179295335	0.0487537912765921
2008183	1	0.030124981948008	0.0463974332368543
2008183	2	0.028980778728227	0.0433009459394261
2008183	3	0.0279281411124032	0.0406343452379161
2008183	4	0.0262064977322551	0.0383411690788567
2008183	5	0.0257307653713937	0.0392845493443641
2008183	6	0.0250821244822611	0.0396508764397492
2008183	7	0.0220586451324601	0.0362675295965785
2008183	8	0.0214216669919762	0.0420925329695778
2008183	9	0.0230703880545277	0.0462999346935253
2008183	10	0.021409083659385	0.0430683590942029
2008183	11	0.019836331211515	0.0385928539420496
2008183	12	0.017961252563189	0.0340720807376684
2008183	13	0.0159803745704814	0.0295284185973185
2008183	14	0.0144051412749794	0.0258898167906387
2008183	15	0.0130569967233683	0.0229126968939521
2008183	16	0.0119631380660509	0.0205943603365482
2008183	17	0.0113524388374583	0.0189478082584575
2008183	18	0.0113857943130339	0.0174137951701686
2008183	19	0.0107432489556043	0.0156915200119504
2008183	20	0.0110300049911125	0.0168250077650599
2008183	21	0.0118207789972375	0.0187357522905759
2008183	22	0.0126854618838429	0.0203591501213622
2008183	23	0.0135354138554542	0.0218329616380239
2008184	0	0.0142659924233982	0.0226515018607535
2008184	1	0.0147107089598904	0.0225798624403305
2008184	2	0.0145710556135804	0.0211860545942012
2008184	3	0.0140308294375865	0.0191231074311724
2008184	4	0.0134076639428102	0.0175474820936014
2008184	5	0.0123185854856001	0.0161943943931447
2008184	6	0.010698803547511	0.0144230037120771
2008184	7	0.00972956947270549	0.0133510425373753
2008184	8	0.00944749101809525	0.013223743250449
2008184	9	0.0103032691968184	0.01506645979847
2008184	10	0.0104435807322347	0.0150633700462594
2008184	11	0.00996654449747058	0.0140667553381385
2008184	12	0.00925575576335805	0.0127821932975875
2008184	13	0.0086877769397096	0.0117876807666068
2008184	14	0.00811918177339291	0.0108815360880694
2008184	15	0.0075559441584006	0.0100495436349156
2008184	16	0.0071012980808384	0.00939231947167248
2008184	17	0.00660264923156892	0.00893016971953108
2008184	18	0.00617963171117426	0.00872222372387316
2008184	19	0.006021579868019	0.00806717328100225
2008184	20	0.00558563522151726	0.00697318341195096
2008184	21	0.00577976019491086	0.00681695010843094
2008184	22	0.006079213345338	0.00710727041119584
2008184	23	0.00610216895549412	0.00721798027231626
2008185	0	0.00603559904547207	0.00726116749224438
2008185	1	0.00591649344777168	0.00737393362490568
2008185	2	0.00582703849689019	0.00751195718503386
2008185	3	0.00584451381027272	0.00777140381351009
2008185	4	0.00580128637866028	0.00787266574392704
2008185	5	0.00558614246366202	0.0073920014692011
2008185	6	0.0053938216829305	0.00685021766337294
2008185	7	0.00531550776239222	0.00656254510060259
2008185	8	0.00532972485587529	0.0065130213373627
2008185	9	0.00541643083284443	0.00661947207940596
2008185	10	0.00545253588206223	0.00664115042447143
2008185	11	0.00545999844762792	0.00665943345511514
2008185	12	0.00538374176078787	0.00657573217075643
2008185	13	0.00527293786534313	0.00641050334140577
2008185	14	0.0051731069048052	0.00625945077106421
2008185	15	0.00506355054426091	0.00610193979131979
2008185	16	0.0049310969987549	0.00596623880523489
2008185	17	0.0047266730937467	0.00580777009227718
2008185	18	0.00450200605124834	0.00558445273420023
2008185	19	0.00434281310897132	0.0053573027522536
2008185	20	0.00412606611000834	0.00495188169354768
2008185	21	0.00288909983813297	0.00346028222595044
2008185	22	0.00217857888980862	0.00259938493684718
2008185	23	0.00235964118620671	0.00281866849832177
2008186	0	0.00429158617217176	0.00544739645022857
2008186	1	0.00790947011739467	0.0132321233072843
2008186	2	0.0134293833654188	0.0267236626058184
2008186	3	0.0180452742179531	0.0366122329416983
2008186	4	0.0189332800432094	0.041231504489669
2008186	5	0.0182458624712701	0.0411669494750084
2008186	6	0.00930432842681791	0.0211211134846337
2008186	7	0.0029174910763722	0.00726845221261126
2008186	8	0.00128255881456244	0.00376400713155246
2008186	9	0.000930817273574361	0.00253405659649617
2008186	10	0.000631539198760581	0.00151147924241797
2008186	11	0.000611321609263392	0.00137095019506083
2008186	12	0.000495543453384379	0.00119815391884293
2008186	13	0.00036553913350651	0.000994714719724254
2008186	14	0.000211416373916344	0.000728606817168576
2008186	15	9.91044521114656e-05	0.000409815737542824
2008186	16	7.0338123122948e-05	0.000305246818227365
2008186	17	3.62333137189137e-05	0.000185562855860726
2008186	18	2.05374295959165e-05	0.000112479353312012
2008186	19	1.55278944925825e-05	8.89533245620024e-05
2008186	20	2.22500456985866e-05	0.00011844572162777
2008186	21	3.30044924317462e-05	0.000173431547472076
2008186	22	3.25879389020436e-05	0.000182196905584751
2008186	23	4.24496678431979e-05	0.000230884608358592
2008187	0	9.48942886232808e-05	0.000453820175987407
2008187	1	0.000586749418695842	0.00211173678351199
2008187	2	0.00238356238389578	0.00627059785384684
2008187	3	0.00656816443742801	0.0161690994100518
2008187	4	0.0118869289089238	0.0280805933201766
2008187	5	0.0154604052975377	0.0567850699878666
2008187	6	0.0192927864208247	0.12761476563823
2008187	7	0.017942522428071	0.117342797223499
2008187	8	0.016747922930399	0.103846016710508
2008187	9	0.0164934270541157	0.097877241137732
2008187	10	0.0163502505840037	0.0917366245660536
2008187	11	0.0159868405460248	0.0806813933084533
2008187	12	0.0152916438770762	0.0659559959585916
2008187	13	0.0149259350444745	0.0542280677556406
2008187	14	0.0148472426926545	0.0454660355230399
2008187	15	0.0152796811364237	0.040626232629863
2008187	16	0.0165768121872074	0.0419787513421537
2008187	17	0.0172438677111427	0.0406832157622046
2008187	18	0.0173802178439637	0.0366640330422612
2008187	19	0.0164308440638484	0.0292066084413941
2008187	20	0.0138912901367599	0.0232093680329691
2008187	21	0.0120419339521026	0.0191982583703222
2008187	22	0.0108675933287206	0.0165092434218525
2008187	23	0.0099929165792195	0.0146886603400634
2008188	0	0.00941984884398088	0.0138790374168444
2008188	1	0.0093133891385148	0.0142190867596349
2008188	2	0.00888941088980417	0.0132259489207142
2008188	3	0.00854548561325096	0.0121422064224923
2008188	4	0.00812181662712796	0.0114655365756489
2008188	5	0.00872156663601489	0.0125950317564271
2008188	6	0.0101973856487755	0.0146781959256615
2008188	7	0.0123555735664539	0.0204105943857818
2008188	8	0.0145727050450289	0.0283587739009849
2008188	9	0.0147222080198747	0.0284955922777317
2008188	10	0.013575424514884	0.0253268365141625
2008188	11	0.0128017510301042	0.023208476899922
2008188	12	0.0149020081180038	0.0236965933780688
2008188	13	0.0150631598698635	0.0237405087125683
2008188	14	0.0138485956130032	0.0217555882326865
2008188	15	0.0128731038797408	0.0205515728509861
2008188	16	0.0115252281737471	0.018781710032667
2008188	17	0.0111030371102365	0.0176445253324733
2008188	18	0.0117731867708873	0.0208379852554095
2008188	19	0.0195086987140934	0.0339402327769663
2008188	20	0.0330651343868062	0.0529981406902763
2008188	21	0.045147469847978	0.070632910766648
2008188	22	0.0470818413244122	0.0700111315082195
2008188	23	0.0448301405878643	0.0643027022859602
2008189	0	0.0422857644159665	0.0596203151971111
2008189	1	0.0399370555443919	0.0559079214427269
2008189	2	0.0374625795706901	0.0519444511487782
2008189	3	0.0352028868807662	0.0481406171756726
2008189	4	0.0311592908487877	0.0446694970553133
2008189	5	0.0361862347540956	0.0548282756920362
2008189	6	0.04912483182569	0.0734190806640856
2008189	7	0.0516872177523629	0.0808883670428852
2008189	8	0.0508848367514495	0.0816238226701884
2008189	9	0.0545232784829869	0.0974320602298242
2008189	10	0.0575249331963999	0.110548610674874
2008189	11	0.0496789395787984	0.0914480376575028
2008189	12	0.0381745652747641	0.06872024780578
2008189	13	0.0356998082691413	0.0648837651584397
2008189	14	0.036361930395207	0.0648970590086113
2008189	15	0.0353216478383383	0.058582965350477
2008189	16	0.0374256154903111	0.0659251959460345
2008189	17	0.0395220681510259	0.0635591297787751
2008189	18	0.0399113081561658	0.0585695940110834
2008189	19	0.0386530908852381	0.0556941966372618
2008189	20	0.0360889410296666	0.051444120897375
2008189	21	0.0318098841482826	0.047277712765325
2008189	22	0.0311116893136973	0.0674620277598
2008189	23	0.0313555778683342	0.0886499095846174
2008190	0	0.0315860805074014	0.0929494083268864
2008190	1	0.0421753058292276	0.172535292774716
2008190	2	0.0416898194142984	0.184111036322709
2008190	3	0.0434860230765517	0.196242344334947
2008190	4	0.0431128704077616	0.175534696452053
2008190	5	0.0339348649094734	0.135094828633994
2008190	6	0.0255037522670872	0.11907918074276
2008190	7	0.0200949646741538	0.101449334657531
2008190	8	0.0164021453099415	0.0799784741244091
2008190	9	0.024751979556118	0.119338011638454
2008190	10	0.0600427137299414	0.21951795646802
2008190	11	0.0835772942950794	0.230910540833125
2008190	12	0.0941118443277346	0.214993128342908
2008190	13	0.0936310908639833	0.186484503976557
2008190	14	0.0934757619550141	0.181807580224435
2008190	15	0.0820002915484357	0.15887703256785
2008190	16	0.0513768466326125	0.0929898779458001
2008190	17	0.0123951390562386	0.0294439021619476
2008190	18	0.0231533794267783	0.0648781906838565
2008190	19	0.0367946842171598	0.0960973187853473
2008190	20	0.0299280537411641	0.0815269535119781
2008190	21	0.0339989103392749	0.099830834569583
2008190	22	0.0718532404983492	0.157102482022358
2008190	23	0.0717477330284908	0.141948994465783
2008191	0	0.0671727972954258	0.12454212091148
2008191	1	0.0684411058792372	0.149264973932656
2008191	2	0.0704615164061131	0.171817801779964
2008191	3	0.0679141383238212	0.17071942750105
2008191	4	0.0765256223015106	0.232313844687538
2008191	5	0.0835923552205031	0.264643161306941
2008191	6	0.0883898581114556	0.291005549685402
2008191	7	0.0928609899897093	0.296490567755169
2008191	8	0.0983147198871544	0.304014043813042
2008191	9	0.108288595837118	0.367822396211001
2008191	10	0.104395096041868	0.339787447548769
2008191	11	0.0893782221512944	0.28747193015736
2008191	12	0.0814267430369369	0.256688716474746
2008191	13	0.0804617564850365	0.239021823190664
2008191	14	0.076723280018379	0.196962915452139
2008191	15	0.0744401048600859	0.170916744416031
2008191	16	0.0705291833897941	0.159168205577148
2008191	17	0.0639812654490257	0.152310791795134
2008191	18	0.0601338083613774	0.133580680767043
2008191	19	0.0528032796844422	0.0937064367384391
2008191	20	0.0400078156708694	0.0631775336320157
2008191	21	0.0106952835231467	0.0181271086932506
2008191	22	0.00784576021558808	0.0129187701955085
2008191	23	0.00779549405163348	0.012162911642631
2008192	0	0.00817023353651771	0.0122754484184009
2008192	1	0.00934998352358401	0.0128097708040625
2008192	2	0.00955926552596639	0.0127254321286781
2008192	3	0.00726922984576151	0.00986898146077095
2008192	4	0.0124975103173392	0.0184825787899883
2008192	5	0.030788456606783	0.0440427461853546
2008192	6	0.0306647801083906	0.0462989728243671
2008192	7	0.0276230236232707	0.0474486721629411
2008192	8	0.025143401521682	0.0450910674150531
2008192	9	0.0246179794045093	0.036111913561619
2008192	10	0.0267096613601703	0.034154155050851
2008192	11	0.0284731131143251	0.0389346670346472
2008192	12	0.0319743787162663	0.0743575038363674
2008192	13	0.0496244308116468	0.157887416262159
2008192	14	0.03350354287626	0.0671075135916841
2008192	15	0.0282329156612171	0.0433613947711864
2008192	16	0.0260587818381896	0.0364235215597488
2008192	17	0.0248251303201406	0.0351044368701185
2008192	18	0.0241091748822243	0.0357058023074373
2008192	19	0.0235076847107309	0.0361684844887583
2008192	20	0.0227396457530953	0.0348824936362775
2008192	21	0.022133687700035	0.0328299481303342
2008192	22	0.0219131677690326	0.0319602315353152
2008192	23	0.0221316988265697	0.0328660854784807
2008193	0	0.0223712808236823	0.0333196896022124
2008193	1	0.0218637748640957	0.0304205879732016
2008193	2	0.0216372945322752	0.0270998092534956
2008193	3	0.021612626540587	0.0239189662198889
2008193	4	0.0216815356386444	0.0234037525982813
2008193	5	0.0199664596164455	0.0219277401919437
2008193	6	0.0189536699924413	0.0209347839387032
2008193	7	0.0181890673291238	0.0198636165043298
2008193	8	0.0172452776545049	0.0188991544400801
2008193	9	0.0164748129309375	0.0185295282138952
2008193	10	0.0159359071595526	0.0194936376264773
2008193	11	0.0153398604562656	0.020558272110623
2008193	12	0.0139429164209248	0.021246338763864
2008193	13	0.0121737103179573	0.0199854652175982
2008193	14	0.0107303402223033	0.0179983257964275
2008193	15	0.00965969355377955	0.0156751130895591
2008193	16	0.00907386027512272	0.0136902050934438
2008193	17	0.00832425406713067	0.0120679477210871
2008193	18	0.00771155007158289	0.011084862735006
2008193	19	0.00716451385279787	0.0100030527109275
2008193	20	0.00646754956782117	0.00960593589844548
2008193	21	0.0037608424407905	0.00819449019920084
2008193	22	0.00296533425564741	0.00995450940645293
2008193	23	0.00366423593931753	0.0163762507563641
2008194	0	0.00258949816277706	0.0122271372731679
2008194	1	0.00337156893457836	0.0208650171542773
2008194	2	0.00523092047946346	0.031179335657177
2008194	3	0.00578276029279606	0.0251279136614055
2008194	4	0.00477322485181337	0.0156731895931073
2008194	5	0.00432610160295064	0.0123713669320912
2008194	6	0.00395469548583622	0.0109520781367458
2008194	7	0.00344490101835391	0.00953476657258003
2008194	8	0.00358093419395348	0.0130083156529929
2008194	9	0.00427547502853379	0.0178289836571972
2008194	10	0.00457765072723222	0.0161024588270824
2008194	11	0.00664078076302426	0.0196554073695935
2008194	12	0.0127349248217302	0.0344080264927311
2008194	13	0.0199955695719501	0.05416278858438
2008194	14	0.0262374689240432	0.0645041092471588
2008194	15	0.0328073197287217	0.07013991856389
2008194	16	0.0394043620647369	0.0733712191615129
2008194	17	0.0466139920117451	0.0831392081380042
2008194	18	0.0571622071834852	0.115800344859753
2008194	19	0.0665361803835352	0.13422923115802
2008194	20	0.069037723966329	0.117201688562203
2008194	21	0.0681536900884555	0.0968290788521356
2008194	22	0.0654359438253019	0.080380831722119
2008194	23	0.0604092835127186	0.0716903511052529
2008195	0	0.049154136505346	0.0591103299017382
2008195	1	0.0369800312992712	0.0457301901396057
2008195	2	0.0287622500065057	0.0364317142557215
2008195	3	0.025599683151627	0.03249178203228
2008195	4	0.0254802973077367	0.0324033561297086
2008195	5	0.0231085301129738	0.0305810671231622
2008195	6	0.019897372728629	0.0273816283904351
2008195	7	0.0297206884617539	0.0412079985422866
2008195	8	0.0418220661393615	0.0602004731961379
2008195	9	0.0460967155833017	0.0693225577772193
2008195	10	0.0474457185202488	0.0757524347596632
2008195	11	0.0436139328636973	0.0717948684261781
2008195	12	0.0417707873030129	0.0706819790628155
2008195	13	0.0418343574205379	0.0731384334036814
2008195	14	0.0418015962056299	0.0754766520925755
2008195	15	0.0374365528004744	0.0684065572231002
2008195	16	0.0307640368897117	0.054913360620528
2008195	17	0.0247156472646693	0.0444348917741096
2008195	18	0.0214002834846164	0.0387995501449554
2008195	19	0.0193623857834838	0.0372002403768307
2008195	20	0.0200579005772135	0.040228730795153
2008195	21	0.0231367249494003	0.0496457027238484
2008195	22	0.028713998005101	0.055282434304009
2008195	23	0.0232442373154284	0.0376761357718276
2008196	0	0.0143991794201859	0.020608917701001
2008196	1	0.0125893692180341	0.0173072999198331
2008196	2	0.0121472334889249	0.0166886641034108
2008196	3	0.0120581751547159	0.0167064737537758
2008196	4	0.0117933496469446	0.0169740582165536
2008196	5	0.0141181704674455	0.026401845145159
2008196	6	0.0175059553895627	0.0360083090960837
2008196	7	0.0257757063870261	0.0619136873667366
2008196	8	0.0601376194935036	0.229558176844939
2008196	9	0.0660703117100615	0.263152807029428
2008196	10	0.0633001432427605	0.269039448761575
2008196	11	0.0578816921372106	0.245696874924446
2008196	12	0.0529450446741953	0.207869994037912
2008196	13	0.051465365360039	0.182633525697632
2008196	14	0.0498503009131685	0.161028669529137
2008196	15	0.0463159116836455	0.137188479880348
2008196	16	0.0437065422044102	0.118641595373715
2008196	17	0.0447337364279049	0.109316869964892
2008196	18	0.0433492718891642	0.0790154852510464
2008196	19	0.0358814376960749	0.0491526413371893
2008196	20	0.0314751857785711	0.0399153541512276
2008196	21	0.0285907670231433	0.035541285299197
2008196	22	0.0263389180767669	0.0327507582331777
2008196	23	0.0244261885688772	0.0304697839033225
2008197	0	0.0223769423594592	0.0283176474738014
2008197	1	0.0210122371662501	0.0281982449581974
2008197	2	0.0203872471605495	0.0282994148783976
2008197	3	0.0194292007698335	0.0275028231846406
2008197	4	0.0218168304953759	0.0326997800698232
2008197	5	0.0295374541323247	0.0511389261787291
2008197	6	0.0283024720122314	0.0566751846573065
2008197	7	0.0583233250696598	0.131579138991994
2008197	8	0.0666653448457498	0.160624564557114
2008197	9	0.0605446772591585	0.141328672766428
2008197	10	0.0604689454656461	0.142631221599035
2008197	11	0.0695488958521986	0.168975965377172
2008197	12	0.0750153060786245	0.176499039424185
2008197	13	0.0577013522391321	0.120960321673259
2008197	14	0.0479938068832209	0.0940243770567676
2008197	15	0.0447111617878594	0.0836372970489197
2008197	16	0.0432587491418243	0.0776571678731495
2008197	17	0.0455009528469865	0.0743316507737281
2008197	18	0.040560864702688	0.0613935792560943
2008197	19	0.0367387295924691	0.0552689623598484
2008197	20	0.0327396965209299	0.0484456176546404
2008197	21	0.0290440699172583	0.0429621323040413
2008197	22	0.0252466277570666	0.0370401793446661
2008197	23	0.0224642698008251	0.0320226753294882
2008198	0	0.0224455376175489	0.0349029326009702
2008198	1	0.0242732362886325	0.0452097934606476
2008198	2	0.0215310610162269	0.0431939703433918
2008198	3	0.0175057298560681	0.0375280583316441
2008198	4	0.0130472778535227	0.0239531327855526
2008198	5	0.00951178407455502	0.0148431086146517
2008198	6	0.00208052983218893	0.00366039319928962
2008198	7	0.00186112840881087	0.00430624855407163
2008198	8	0.0122776292946165	0.0283334242822411
2008198	9	0.0173677054873092	0.042913796137179
2008198	10	0.0180765861173473	0.048620315872096
2008198	11	0.0169214743241712	0.0444615228727263
2008198	12	0.0179828514790003	0.04501957584313
2008198	13	0.0154266077842995	0.0402897270205002
2008198	14	0.0102673169615412	0.0259475026293378
2008198	15	0.00837998975259621	0.0192601835511663
2008198	16	0.010221077446198	0.0227511950626063
2008198	17	0.00868390715629569	0.0212271024542922
2008198	18	0.00721117065450066	0.0205280665677501
2008198	19	0.00870038848702049	0.0323489445640201
2008198	20	0.0175272601507337	0.0697453932717069
2008198	21	0.027597924798249	0.0988158867820633
2008198	22	0.0319129839456699	0.106782705972283
2008198	23	0.0321637904076082	0.0954366911456952
2008199	0	0.0331528347806444	0.0878677893039395
2008199	1	0.0370267745087383	0.0889363056387318
2008199	2	0.0435569556003233	0.102942127159366
2008199	3	0.0504213436976502	0.123433080881083
2008199	4	0.0606195743068944	0.14966931870633
2008199	5	0.0813714834889306	0.20735604829383
2008199	6	0.105185156524375	0.309584096942694
2008199	7	0.106442161284428	0.313771124650775
2008199	8	0.0978632089482237	0.28590669746208
2008199	9	0.0830544879656074	0.236674123021454
2008199	10	0.0720963619540738	0.211396668371707
2008199	11	0.0705483778465113	0.225457097156198
2008199	12	0.0715174662370409	0.223313205612955
2008199	13	0.0694932365000993	0.203996460488632
2008199	14	0.0656885789021624	0.173290214208781
2008199	15	0.0601739992814278	0.140136022446382
2008199	16	0.0536990156555686	0.110100875039827
2008199	17	0.0503791777129741	0.0912423903520623
2008199	18	0.0455999406897944	0.0700314581705417
2008199	19	0.0400236177973569	0.0559486274843971
2008199	20	0.0365696630293449	0.0476316561890108
2008199	21	0.0351432013836228	0.0448722620584331
2008199	22	0.0339513533058013	0.0418968870815406
2008199	23	0.030117061999541	0.036649431853627
2008200	0	0.0263806574691637	0.0330964223768187
2008200	1	0.0243437394198223	0.0313496069718
2008200	2	0.0225981283979715	0.0301956042732879
2008200	3	0.0214715753230322	0.0297945104867749
2008200	4	0.0211476167772481	0.0302976552415603
2008200	5	0.0210998240779719	0.0313822270985232
2008200	6	0.0216839973874875	0.0343361432453428
2008200	7	0.0305051349374741	0.0777833147743509
2008200	8	0.0368258891551461	0.104395491213933
2008200	9	0.0333647890774754	0.0771881579369457
2008200	10	0.02863575187431	0.0515651213569977
2008200	11	0.0280002711836338	0.0418522070862055
2008200	12	0.0293422534770298	0.0397754267256957
2008200	13	0.0270080400971884	0.03752998848742
2008200	14	0.0218821510641299	0.032465099633686
2008200	15	0.0136395997191971	0.0210182150497654
2008200	16	0.0104235459291059	0.0151141919855567
2008200	17	0.0095596789327824	0.0135663528744939
2008200	18	0.00829190494661288	0.011957656075347
2008200	19	0.00677934493561284	0.0104522409883057
2008200	20	0.0074603921714625	0.0161597083384163
2008200	21	0.0101317704770022	0.0228962658866224
2008200	22	0.0147577383278529	0.0263762675160532
2008200	23	0.0189292493317364	0.0301213965539688
2008201	0	0.0274483923856256	0.0631084229089351
2008201	1	0.0330807832637102	0.0696443990377411
2008201	2	0.0309556348049507	0.0527044866261586
2008201	3	0.027301816783252	0.0425476953387519
2008201	4	0.0223399648744374	0.033846486669335
2008201	5	0.0189304466822724	0.0280783922678252
2008201	6	0.0162640383148768	0.0220486380627238
2008201	7	0.0247519241026745	0.0317980127919315
2008201	8	0.0314649842001189	0.0418695881189325
2008201	9	0.0299510648568119	0.0438139335964412
2008201	10	0.0254357135386549	0.0394660235778102
2008201	11	0.0227276499164523	0.0388900380691444
2008201	12	0.0222056670085076	0.0435536742629811
2008201	13	0.0228709365022806	0.0509797083284842
2008201	14	0.0182704631220463	0.0374157046952682
2008201	15	0.00920748617525807	0.0198341153611185
2008201	16	0.0181528939820542	0.0441212950893434
2008201	17	0.0277339555817708	0.0761207442640082
2008201	18	0.0280945883534033	0.0619237712807986
2008201	19	0.0270359814423972	0.0505969376560573
2008201	20	0.0245057592415391	0.040329659080227
2008201	21	0.0190957503554763	0.031140044850787
2008201	22	0.0120838652210904	0.0261650835304851
2008201	23	0.0110541339884422	0.0409206558479729
2008202	0	0.0146845268902289	0.0819303054466173
2008202	1	0.0273248812244386	0.164185645874272
2008202	2	0.0460918088473322	0.222471076673521
2008202	3	0.0492447845178502	0.196191936851838
2008202	4	0.0424088873127071	0.153474595939123
2008202	5	0.0353419683211332	0.141322101384023
2008202	6	0.0326829880486761	0.137261761591582
2008202	7	0.0362106745620028	0.184195665586552
2008202	8	0.0359625435387006	0.169385043461119
2008202	9	0.0353526412011849	0.152631295636872
2008202	10	0.0337398037957087	0.136505007411718
2008202	11	0.0302855714738595	0.10844957601272
2008202	12	0.0278513588655713	0.0838504262884485
2008202	13	0.0264689869669224	0.0686398168617629
2008202	14	0.0278061540767369	0.0710019554009053
2008202	15	0.0339271856949367	0.0974333667522194
2008202	16	0.0343691242192184	0.0941888857712422
2008202	17	0.0329211750103597	0.084619775203411
2008202	18	0.0355185427896328	0.0796543762592045
2008202	19	0.0316496282412602	0.0514445722760664
2008202	20	0.0281524631771599	0.0409377921708756
2008202	21	0.0365944234565744	0.0572031251511019
2008202	22	0.0569874701307324	0.100432861322589
2008202	23	0.0608038075093308	0.112448257494673
2008203	0	0.0580612688099556	0.10351026509751
2008203	1	0.0526897958786402	0.0934467286205775
2008203	2	0.0535281480856898	0.0973596514516812
2008203	3	0.0572333187469086	0.107963441164929
2008203	4	0.0574504240311843	0.107761328707709
2008203	5	0.0624769055424099	0.138453562070645
2008203	6	0.0793160394882861	0.277367366993379
2008203	7	0.113542671750472	0.564178273253541
2008203	8	0.171947705828793	1.07113453272238
2008203	9	0.254474675519659	1.68973657938616
2008203	10	0.237765392500561	1.34055842864812
2008203	11	0.192710906045914	1.00469158297022
2008203	12	0.13015919702843	0.627118960863395
2008203	13	0.0544018898013221	0.224291600693371
2008203	14	0.0571961817482623	0.207584374954939
2008203	15	0.0557296204196502	0.198835968254005
2008203	16	0.0196354906743916	0.0936776271291248
2008203	17	0.00372048471388248	0.0222735199854022
2008203	18	0.00644947466122236	0.0402638785675587
2008203	19	0.0300852905337759	0.165437005038945
2008203	20	0.042999860798745	0.29896093091495
2008203	21	0.0428995804657757	0.259865330447016
2008203	22	0.0436940971854037	0.218562906418929
2008203	23	0.0276096693179361	0.133479865208287
2008204	0	0.000591589527485189	0.00309841879883539
2008204	1	0.00411383909308335	0.0292350467818417
2008204	2	0.0159201092137886	0.127842843364131
2008204	3	0.0211986925629629	0.195801961107844
2008204	4	0.0187333452515299	0.159587813556356
2008204	5	0.0163219616616772	0.180590887450904
2008204	6	0.0140550383324405	0.158438719636924
2008204	7	0.0141491489887536	0.131682304159892
2008204	8	0.0186733064667584	0.146212374870109
2008204	9	0.0251790127662305	0.174104678749262
2008204	10	0.0332388061639318	0.225295621887469
2008204	11	0.036670447868635	0.249318332370571
2008204	12	0.0353846271665017	0.21625873042296
2008204	13	0.0315433719138393	0.168422960880002
2008204	14	0.0277415832743102	0.144955180366737
2008204	15	0.0253262724831117	0.127320300718169
2008204	16	0.0232209947159515	0.101583534628533
2008204	17	0.0239744015252823	0.0859727825758753
2008204	18	0.0236717013221004	0.0643025738416917
2008204	19	0.0215493191105526	0.0497963212415627
2008204	20	0.0211291163905642	0.0422281379250506
2008204	21	0.0281894857814043	0.0492227502784337
2008204	22	0.0609909695636475	0.0933775270287989
2008204	23	0.105207930758039	0.157028237337313
2008205	0	0.123129078290375	0.18280635071579
2008205	1	0.123858448699588	0.180566580221943
2008205	2	0.122593409704788	0.174010453228191
2008205	3	0.121485153021379	0.169268637117041
2008205	4	0.118694057551735	0.166194534576181
2008205	5	0.117332369174862	0.165178172301134
2008205	6	0.113868814420288	0.163820951207411
2008205	7	0.111419487775708	0.164990924063742
2008205	8	0.104042367468626	0.168763663177614
2008205	9	0.0951274727839927	0.16099524664147
2008205	10	0.0850678067889528	0.146481078275741
2008205	11	0.0777224742406155	0.138506370694054
2008205	12	0.0745138434935224	0.128990259218508
2008205	13	0.0708191307305214	0.11780425403226
2008205	14	0.0681504564094431	0.111885443134952
2008205	15	0.0658427813117197	0.108291084230018
2008205	16	0.0624431682093482	0.103677906983584
2008205	17	0.0617187256056495	0.100878444213677
2008205	18	0.0577865101846951	0.0889410631177883
2008205	19	0.0550227333640228	0.0827222796522764
2008205	20	0.0514268347289303	0.0750371766079399
2008205	21	0.0456991895586878	0.0635276838046582
2008205	22	0.0481986250024323	0.0637765588142366
2008205	23	0.0622006569901457	0.0823571838234447
2008206	0	0.0618805130943391	0.0826538671533133
2008206	1	0.0537655805364141	0.0706399773612019
2008206	2	0.0429365526276361	0.0575782239324487
2008206	3	0.0327784848267506	0.0478905229077955
2008206	4	0.0277643114718456	0.0453402160344403
2008206	5	0.0215939955538495	0.0353692162231742
2008206	6	0.017705441147748	0.0294796350263678
2008206	7	0.0163141531533884	0.0325428598929419
2008206	8	0.0157511905116751	0.0322779793517988
2008206	9	0.017018399881321	0.0342760606702935
2008206	10	0.0179476869825192	0.0363965285428141
2008206	11	0.019633832747777	0.0389673638092859
2008206	12	0.0191490100341841	0.0359228150986113
2008206	13	0.0174722298937464	0.0316076354186941
2008206	14	0.0157307682990244	0.0276980734023364
2008206	15	0.0146003524531785	0.02429269528916
2008206	16	0.0141844309195778	0.0214255668574191
2008206	17	0.0139511866671121	0.0187263646754365
2008206	18	0.014417304735563	0.0182594241830096
2008206	19	0.0161444055263652	0.0202155541030911
2008206	20	0.0175508955791526	0.0223075396778859
2008206	21	0.0181601424829801	0.0231654744952524
2008206	22	0.0181018270967185	0.0231751981773036
2008206	23	0.0183845294424151	0.0233596330645295
2008207	0	0.0186946904007464	0.0228890771570718
2008207	1	0.0177848919701148	0.0210917571455494
2008207	2	0.0153578819073952	0.0182256298312075
2008207	3	0.011209107724879	0.0148283018912965
2008207	4	0.00892022460605084	0.0125399569434614
2008207	5	0.00998548294651785	0.013427452580914
2008207	6	0.0130779018894125	0.0164007530420261
2008207	7	0.0174678059402169	0.0201931947434423
2008207	8	0.0219280145701962	0.0239701362335363
2008207	9	0.0247059216766952	0.0262148933497343
2008207	10	0.023970305559878	0.0250499951591474
2008207	11	0.0185617846801045	0.0192796328633709
2008207	12	0.0132858674590479	0.0139424412740629
2008207	13	0.0099085292262175	0.0105376103950166
2008207	14	0.00750611155067087	0.00801998912642725
2008207	15	0.0057287552431908	0.00615246153097225
2008207	16	0.0045999901479201	0.00498974408678823
2008207	17	0.00393103054249192	0.00428752136109909
2008207	18	0.00353284088492067	0.00383255176279374
2008207	19	0.00335694045203141	0.00362393901106138
2008207	20	0.00335245120679045	0.00360678191745138
2008207	21	0.00380678361017093	0.00407586085663525
2008207	22	0.0043220034080644	0.00464310455894728
2008207	23	0.00445863337671843	0.00479059350191151
2008208	0	0.0046322652792014	0.00498161638045119
2008208	1	0.00494108938642206	0.00535885184433793
2008208	2	0.00532682678505021	0.00581870670277446
2008208	3	0.0057971890873967	0.006353445714872
2008208	4	0.00630935928056767	0.00687907878770693
2008208	5	0.00660241306226782	0.00708378557519096
2008208	6	0.00648119599267907	0.00692430017855109
2008208	7	0.0060825211861567	0.00647864142654797
2008208	8	0.00565414584504166	0.00600005935774187
2008208	9	0.00544124856441353	0.00575775800071223
2008208	10	0.00466859335331235	0.00500462485765244
2008208	11	0.0046548513202228	0.00515209117838195
2008208	12	0.00476964593284513	0.00534457640429704
2008208	13	0.00488035345276345	0.00559846429235536
2008208	14	0.00489168523930917	0.00562923237281443
2008208	15	0.00466499159391305	0.00540083904805366
2008208	16	0.00429540276339793	0.00500548255885937
2008208	17	0.00396750835660277	0.00457855442673492
2008208	18	0.00376155646579609	0.00425796498840499
2008208	19	0.00390037010625194	0.0044186616608615
2008208	20	0.00441607447547901	0.0050602594318729
2008208	21	0.00584644200272292	0.0065948265059003
2008208	22	0.0082104796337063	0.00888559424556844
2008208	23	0.0089631579557019	0.0094590256379347
2008209	0	0.00904741437549899	0.00944265315968142
2008209	1	0.00907039130619918	0.0093966504427648
2008209	2	0.00906087706635087	0.0093638348040848
2008209	3	0.00902473501467443	0.009326861751688
2008209	4	0.00883838889014573	0.00910344162923966
2008209	5	0.00874571654016769	0.00899084839630551
2008209	6	0.00899695832509097	0.0092317421943608
2008209	7	0.00925419187220769	0.0094771550632473
2008209	8	0.00925367650759439	0.00947808437867922
2008209	9	0.00897305020378815	0.00924768284297163
2008209	10	0.00873033110612903	0.00920255378792532
2008209	11	0.00880030800150091	0.0093729682974419
2008209	12	0.00893891338492484	0.00936016955503665
2008209	13	0.00892201357221942	0.0093163415789102
2008209	14	0.008939728236099	0.00930149604914824
2008209	15	0.00896753948682569	0.00930872593693829
2008209	16	0.00885628673530488	0.00921291182526726
2008209	17	0.00883474874676392	0.00920928492076874
2008209	18	0.00887907424334126	0.00927098165123786
2008209	19	0.00885353485941272	0.00925938921320231
2008209	20	0.00874981463055235	0.00917329753289264
2008209	21	0.00811183400138607	0.00850158531001263
2008209	22	0.00662701109455281	0.0069123316680567
2008209	23	0.00566890503831334	0.00588085620388918
2008210	0	0.00553401557137612	0.00571766258732334
2008210	1	0.00553712793385384	0.00571645913119127
2008210	2	0.00565812209641422	0.00582647582628305
2008210	3	0.00575799639471901	0.00590810926537787
2008210	4	0.0058114491118496	0.00595597312488829
2008210	5	0.00582339978427544	0.00597077632189595
2008210	6	0.00579847915586116	0.00593435875099698
2008210	7	0.00586989115950807	0.00601462648766892
2008210	8	0.00597593597407545	0.00618014768740173
2008210	9	0.00613866006761611	0.00648773268761436
2008210	10	0.00633178342129709	0.00686013334116536
2008210	11	0.0059770682625298	0.00658174166535976
2008210	12	0.00580827230400876	0.00677967754464119
2008210	13	0.00580225303613492	0.00747909785199818
2008210	14	0.00591409725086234	0.00810621399277481
2008210	15	0.006263101962442	0.00850618705530293
2008210	16	0.00700883748687486	0.00912064006176471
2008210	17	0.00815273126799707	0.0100813605165279
2008210	18	0.00947089659498098	0.0111988506336341
2008210	19	0.0106326974145509	0.0132653880471606
2008210	20	0.0112328960654606	0.0147342670269121
2008210	21	0.0110217803178268	0.0141370981601276
2008210	22	0.0106962895279567	0.0132038252971876
2008210	23	0.00954391699576521	0.0108569450733243
2008211	0	0.00778110824214266	0.00835064585387057
2008211	1	0.00606189389627564	0.00642524369313439
2008211	2	0.00495534658209278	0.0052685314883654
2008211	3	0.00454100633931524	0.00480378718180946
2008211	4	0.00425933396049556	0.00451400772457118
2008211	5	0.00404598248695468	0.00427048028665612
2008211	6	0.00395896696407265	0.00417317239784485
2008211	7	0.0038428683855343	0.00404059102748013
2008211	8	0.00413871862624561	0.00457114066893218
2008211	9	0.00476178987751211	0.00569929664741393
2008211	10	0.00504907113109493	0.00649511182730865
2008211	11	0.00475644112741997	0.00638469048739353
2008211	12	0.00466992673332034	0.00658718603247023
2008211	13	0.00465932310106124	0.00679303793487752
2008211	14	0.00473855466585942	0.00741054470979702
2008211	15	0.00487363389520965	0.00820012086267721
2008211	16	0.00514188954312028	0.00898614817289191
2008211	17	0.00525075542322178	0.00853464737118129
2008211	18	0.00468914165783997	0.00631480242936258
2008211	19	0.00432276461909012	0.00531228726068649
2008211	20	0.00404539909884787	0.00475508823507229
2008211	21	0.00381539429706169	0.00442942868711821
2008211	22	0.00361588434965943	0.00409680868070841
2008211	23	0.00348772608087734	0.00388986079949002
2008212	0	0.00337878372350651	0.00373434177791608
2008212	1	0.00330178075232567	0.0036296513533867
2008212	2	0.00327982401374413	0.0036017122119046
2008212	3	0.00325503367466382	0.00356839777274803
2008212	4	0.00322150929036828	0.0035235419431731
2008212	5	0.00316472374093584	0.00345998237192083
2008212	6	0.00308986622074735	0.00336606419227259
2008212	7	0.00309139528480433	0.00349487932169156
2008212	8	0.00319544838702498	0.00389487122030932
2008212	9	0.00393806298014706	0.00544700205593133
2008212	10	0.00456762269561984	0.00665798716340641
2008212	11	0.00497467227074316	0.00732673624423634
2008212	12	0.00500937565072742	0.00703640563448659
2008212	13	0.00483887004340858	0.00661721489716913
2008212	14	0.00466766603292144	0.00629393517327056
2008212	15	0.00446153991284457	0.00601711586075574
2008212	16	0.00423517279474132	0.00583468267017102
2008212	17	0.00400767388700447	0.00582170578042285
2008212	18	0.00382865569010768	0.00579460165324427
2008212	19	0.00358848605753746	0.00510564484468231
2008212	20	0.00347936403062353	0.00457453964967662
2008212	21	0.00346273379976479	0.00424427788861483
2008212	22	0.00355054329653267	0.00415940381138511
2008212	23	0.00365314859593183	0.0041712544852162
2008213	0	0.00365794200763834	0.00413406393431648
2008213	1	0.00362763984178319	0.00409787665566721
2008213	2	0.00359371204856542	0.00409927767948483
2008213	3	0.00355291703592502	0.0040774968957936
2008213	4	0.00338774677017808	0.00387251788021923
2008213	5	0.00311072003231623	0.00353811252107376
2008213	6	0.00280252568040724	0.00314101161502283
2008213	7	0.00284352852269958	0.0033933252223252
2008213	8	0.00282773466689845	0.00347677798990223
2008213	9	0.00315354486590753	0.0042399056390963
2008213	10	0.00345951800969039	0.00473746694593349
2008213	11	0.00355904433187361	0.00488281958453688
2008213	12	0.00367516859415689	0.0050738898011071
2008213	13	0.00370667305227597	0.00506156243622769
2008213	14	0.0036284201007452	0.00496481826175737
2008213	15	0.00356183173777309	0.00492074088136131
2008213	16	0.00351557715417039	0.00486476625837294
2008213	17	0.00329940732404104	0.00442799183904951
2008213	18	0.00305443006035353	0.00377498775913797
2008213	19	0.00288312262265395	0.00331596168056598
2008213	20	0.00274964956777515	0.00305837391056475
2008213	21	0.00263054888840816	0.00287337314094785
2008213	22	0.00253697178139118	0.00274773678196235
2008213	23	0.00250530218230967	0.00271266170013341
2008214	0	0.0024829333057263	0.00271322309366329
2008214	1	0.00248449804964	0.00276146867106399
2008214	2	0.00250335308617923	0.00285092661251449
2008214	3	0.00251029453068667	0.00293286215556334
2008214	4	0.00252363756567295	0.00303120033641647
2008214	5	0.00253823605404609	0.00318612730116683
2008214	6	0.00254939916607969	0.00340047528540544
2008214	7	0.00259289080560095	0.00364291752223564
2008214	8	0.00258228364514325	0.00361883560733441
2008214	9	0.00261384205173133	0.00372209974894356
2008214	10	0.00272414760048509	0.00403419466785115
2008214	11	0.00278750723395092	0.00425321276819353
2008214	12	0.00321488863379292	0.0054057334216111
2008214	13	0.00326127509359308	0.0056982207307937
2008214	14	0.0032154632471275	0.00586097476370971
2008214	15	0.00315771293985373	0.00607010139564349
2008214	16	0.00302978196884462	0.0060766511501211
2008214	17	0.00282491656815204	0.00603005696420422
2008214	18	0.00259877810438484	0.00582343538856069
2008214	19	0.00244505542807253	0.0051328349880301
2008214	20	0.00234146343506424	0.00470151744734608
2008214	21	0.00222902777429812	0.00432588683315593
2008214	22	0.00224729575561143	0.00428165044883457
2008214	23	0.00245026451983279	0.00463869078810108
2008215	0	0.00340279844436927	0.00686888636047548
2008215	1	0.00464493556001376	0.00983330175364845
2008215	2	0.00509612975697396	0.0116987756664548
2008215	3	0.00515239474513243	0.0131716463246272
2008215	4	0.0102648684794193	0.0252610318671798
2008215	5	0.0132559276520141	0.0340341065248802
2008215	6	0.0138802277963344	0.036373488563619
2008215	7	0.0243052250572402	0.0706376502756576
2008215	8	0.0444361207174798	0.149586659044289
2008215	9	0.0654468564132231	0.260887977812763
2008215	10	0.069980807787327	0.296036498151697
2008215	11	0.0629475094669948	0.257658492691366
2008215	12	0.0582041691277014	0.232709242781018
2008215	13	0.0513387337146657	0.194009761936281
2008215	14	0.0453414634451892	0.164665085166729
2008215	15	0.0454892830353121	0.161150499592438
2008215	16	0.0507670328786505	0.175250037007881
2008215	17	0.0577219466937511	0.182225328717565
2008215	18	0.0706312450602728	0.177120130003594
2008215	19	0.0582507380041195	0.101290962980165
2008215	20	0.0526686300801784	0.0842646508630334
2008215	21	0.049673689865749	0.0781741092313806
2008215	22	0.0469150129715313	0.0716260564823236
2008215	23	0.0444549426297864	0.0641285103945651
2008216	0	0.0446611204821485	0.065754400011828
2008216	1	0.0440648001282556	0.0647410319309767
2008216	2	0.0415395894189639	0.0592102506049222
2008216	3	0.0369139633289315	0.0516351861676752
2008216	4	0.0321802630239131	0.0428292223510878
2008216	5	0.0321180873810777	0.0388215247387118
2008216	6	0.0329939459710077	0.0387056543217061
2008216	7	0.0299860312368217	0.0363930619102758
2008216	8	0.0331963845570435	0.0618320763236912
2008216	9	0.0362576788264404	0.0811157578882803
2008216	10	0.0410101986391971	0.0988735314585756
2008216	11	0.0513863857318209	0.118947346918998
2008216	12	0.0481989457280237	0.0977482213184292
2008216	13	0.045096339692562	0.0900534802521742
2008216	14	0.0438488155158881	0.0895494969864236
2008216	15	0.0421532586050022	0.0834471650032949
2008216	16	0.0396078471699572	0.0725938720133144
2008216	17	0.0380553826193298	0.064511041077999
2008216	18	0.0342140217801463	0.0530723106936741
2008216	19	0.0291788905130512	0.0423101180312249
2008216	20	0.0222278578161785	0.0314718661909285
2008216	21	0.0159285024196029	0.0235957395261191
2008216	22	0.0166765916604759	0.0281142702979644
2008216	23	0.015225412370252	0.0213740621574934
2008217	0	0.0134760820138344	0.0167047750375435
2008217	1	0.0141647554934489	0.0182819052146015
2008217	2	0.0156263024606962	0.0190235419036386
2008217	3	0.016832865502488	0.0197464491663301
2008217	4	0.022354506505756	0.0254237493541114
2008217	5	0.025400452185961	0.0378941095177927
2008217	6	0.0127905293581275	0.0408935522847304
2008217	7	0.000761352683882482	0.00257903979177198
2008217	8	0.000974437968009766	0.00471682509255974
2008217	9	0.00398481134997572	0.0189022561327745
2008217	10	0.0044885077594439	0.0205283947526525
2008217	11	0.00431377072372983	0.0195713128769501
2008217	12	0.00452357535914422	0.0206921775709892
2008217	13	0.00394199007920037	0.0182815660412711
2008217	14	0.00281751056974016	0.0162227465939275
2008217	15	0.00440180354790568	0.0324829652760075
2008217	16	0.00906874056910024	0.0529588654239516
2008217	17	0.00738967242967493	0.0437558350002144
2008217	18	0.0118864293315593	0.0859443616293099
2008217	19	0.0223496848019042	0.130247958396294
2008217	20	0.0257915650839491	0.132574675498731
2008217	21	0.0245766066968325	0.119188596291111
2008217	22	0.0251193115326309	0.121476453309161
2008217	23	0.0245980029719794	0.110773689370654
2008218	0	0.0247632520706383	0.104956630785173
2008218	1	0.0253038714387848	0.104738104559159
2008218	2	0.0253531858292419	0.112933199690459
2008218	3	0.0245657358169155	0.12715577667107
2008218	4	0.0284976914373127	0.198668738890852
2008218	5	0.0348815904302721	0.28356646979481
2008218	6	0.0439884923759851	0.361926975671813
2008218	7	0.0457067162092947	0.339541177411499
2008218	8	0.0486203218111948	0.349132974069598
2008218	9	0.0530261860843806	0.376973140228609
2008218	10	0.0577645898953411	0.393184405087423
2008218	11	0.0572387178102436	0.356530380637947
2008218	12	0.0538957110378278	0.305578244831203
2008218	13	0.0513497577512591	0.270806046016735
2008218	14	0.0495533132683443	0.241931211398698
2008218	15	0.0458818845089515	0.197974421890991
2008218	16	0.0394493188511995	0.141615640206219
2008218	17	0.0338082613693336	0.103890602194296
2008218	18	0.0312236381682218	0.0935533668289025
2008218	19	0.032691498150575	0.103463627642432
2008218	20	0.0327460744005628	0.0908197126071794
2008218	21	0.0336356666081482	0.0791190314674333
2008218	22	0.0391355420235513	0.0863757395033128
2008218	23	0.044443297206752	0.0893071065848382
2008219	0	0.0443551614027635	0.0810954249902339
2008219	1	0.0403374151699939	0.0718843053647465
2008219	2	0.0403268690598192	0.0813751959065949
2008219	3	0.0444734964742865	0.108802256975882
2008219	4	0.0406439525735389	0.100729539122908
2008219	5	0.0365962449253667	0.0878079450836614
2008219	6	0.0343629064386307	0.0783710851483015
2008219	7	0.0269848611115865	0.0645089096779119
2008219	8	0.0270348110919121	0.0801858056172666
2008219	9	0.0274006860467641	0.0859757956897477
2008219	10	0.0276209804865151	0.0917515651879105
2008219	11	0.0283989707827742	0.0986124357707633
2008219	12	0.0276135838649551	0.0981159781658644
2008219	13	0.0277468846718337	0.102632751065151
2008219	14	0.0285446460204515	0.107668579785822
2008219	15	0.0294320988595357	0.109796682867369
2008219	16	0.0299868496708326	0.108162916972698
2008219	17	0.0297817222697375	0.104650012521402
2008219	18	0.0287275585279537	0.101524031701634
2008219	19	0.0278866096010973	0.0996558769571071
2008219	20	0.0267205132299395	0.0952148032213134
2008219	21	0.0254295764300142	0.0892096182612197
2008219	22	0.0244266001166729	0.0824228025225539
2008219	23	0.0228810089018814	0.0732846612670847
2008220	0	0.0214755494797282	0.063767829692917
2008220	1	0.0199374875838922	0.0541418557272461
2008220	2	0.0184159349624201	0.0459376336938653
2008220	3	0.0171575467834051	0.0399021738249103
2008220	4	0.0152829547400003	0.0347612071035428
2008220	5	0.0144939453424792	0.0345211729118896
2008220	6	0.0138983846541994	0.0335746358635638
2008220	7	0.0142846044212017	0.0329702364280952
2008220	8	0.0137088657643811	0.0343645927673375
2008220	9	0.0174958567538654	0.0571361757896754
2008220	10	0.0160065591303436	0.0548298139394078
2008220	11	0.0134454423268048	0.0447480504985497
2008220	12	0.0104897813088002	0.031513973621687
2008220	13	0.00905423599151275	0.0241911354359118
2008220	14	0.00861573482621439	0.019118622577384
2008220	15	0.00790213954303188	0.0145454745047252
2008220	16	0.00753361200364651	0.0126813066920781
2008220	17	0.00721720027905573	0.0111558773623618
2008220	18	0.00680419409006273	0.0096109853869589
2008220	19	0.00636249870968062	0.00826384431992091
2008220	20	0.00565903778269042	0.00707264012444804
2008220	21	0.0044914349808718	0.00587530595835025
2008220	22	0.00403409433504663	0.00588780154261114
2008220	23	0.00542708601529213	0.00931772045506281
2008221	0	0.00929545333539104	0.0170127018360159
2008221	1	0.00693197265534084	0.0145488706803805
2008221	2	0.00297365710775047	0.00960366905802972
2008221	3	0.00192248626467817	0.00731241924238339
2008221	4	0.00133044701914983	0.00574543437467666
2008221	5	0.00237969353115803	0.00982079616042112
2008221	6	0.00532767475595352	0.025869623582716
2008221	7	0.00949746409110181	0.0411933314079058
2008221	8	0.00966937249171128	0.0396436109347596
2008221	9	0.00621863798426049	0.0257850982525291
2008221	10	0.00635553089707634	0.026661078418743
2008221	11	0.0355063769633657	0.127153025313345
2008221	12	0.0606409478595002	0.187783336713027
2008221	13	0.0533276648971837	0.13599623526047
2008221	14	0.0327079974446034	0.0788982862255882
2008221	15	0.00802825166979322	0.0229936361030473
2008221	16	0.00397106387625363	0.0128364042669016
2008221	17	0.00901819620210698	0.027746262778124
2008221	18	0.0118088922448935	0.0293794341851328
2008221	19	0.00994721488959636	0.0250472479352467
2008221	20	0.0147664315238142	0.0473387172354792
2008221	21	0.0394380202494928	0.206561215082169
2008221	22	0.0455028888939735	0.321034580257949
2008221	23	0.0275978435437598	0.254307761082588
2008222	0	0.0382909829711834	0.394518708153465
2008222	1	0.118382625682699	0.903532737952327
2008222	2	0.174738566686078	1.19674925723141
2008222	3	0.232209416545882	1.55132535228109
2008222	4	0.245778505386142	1.65428294603086
2008222	5	0.257528646122855	1.60968059321213
2008222	6	0.266447426365142	1.64193142632913
2008222	7	0.259255922114915	1.50389462840345
2008222	8	0.240895452831201	1.38386562437514
2008222	9	0.228850384896683	1.27267149958543
2008222	10	0.199038465959819	1.09996111403774
2008222	11	0.179236125827253	1.06034702287023
2008222	12	0.137119407070211	0.745738034848989
2008222	13	0.0938336230906927	0.384402427139421
2008222	14	0.0794756058488535	0.268756352070876
2008222	15	0.0726582645993929	0.217150465229204
2008222	16	0.0679379332153349	0.181837881052415
2008222	17	0.0631188979222297	0.149971613807972
2008222	18	0.0600129266884468	0.130880657632399
2008222	19	0.0557241512906018	0.114883090783808
2008222	20	0.0545763353630578	0.119697795701293
2008222	21	0.0587706999491896	0.125524023328329
2008222	22	0.0623094571079331	0.131443047200917
2008222	23	0.0624498887212289	0.12076720417069
2008223	0	0.0630268050999193	0.111102349846102
2008223	1	0.0600760727580023	0.0994887890224986
2008223	2	0.0594522750124218	0.0972879274093873
2008223	3	0.0615807786408657	0.0975477883033503
2008223	4	0.0632455374942028	0.0951061965269101
2008223	5	0.0570966749261609	0.0848839767884955
2008223	6	0.0545111717669625	0.0825332911180206
2008223	7	0.0602841841580578	0.0995441178223284
2008223	8	0.0579339753768546	0.102034844142186
2008223	9	0.0497058029381271	0.0935570421862702
2008223	10	0.0424168487184099	0.0807805332704244
2008223	11	0.0356941742920742	0.0632843785616597
2008223	12	0.0289094782189869	0.0479362001869415
2008223	13	0.0244056445157111	0.0360903643852195
2008223	14	0.0218878090932401	0.0291892085902798
2008223	15	0.0207854636845943	0.0261774918505328
2008223	16	0.0211754662749781	0.025652397302106
2008223	17	0.0219008667609092	0.0268982164162822
2008223	18	0.0232658989427582	0.0306103895939425
2008223	19	0.0235545746141758	0.0323389063378962
2008223	20	0.0232107975731163	0.0320826295073081
2008223	21	0.0230890434413129	0.0317025856801963
2008223	22	0.0230604844525141	0.0316678166835392
2008223	23	0.0247648646129173	0.0343429937479556
2008224	0	0.0268834943949275	0.0373963672309679
2008224	1	0.0274374654505909	0.0385600440487574
2008224	2	0.0272807167301438	0.038397974863566
2008224	3	0.027024306562736	0.0376810815711629
2008224	4	0.0263856867790438	0.035691032656545
2008224	5	0.022442543717168	0.0279885887626924
2008224	6	0.0184687560294948	0.0215401583004784
2008224	7	0.0160913072106479	0.0186751605625311
2008224	8	0.0157998437703452	0.021972677816513
2008224	9	0.0206821697329087	0.0521243899571903
2008224	10	0.02099290393453	0.0644066421242612
2008224	11	0.0227620666181878	0.0726385673789508
2008224	12	0.0230709169394701	0.0631860466080988
2008224	13	0.0231332706041732	0.0545276193273545
2008224	14	0.0233178979459035	0.0497798819984447
2008224	15	0.0237489982593213	0.0498878155515838
2008224	16	0.0241673057744482	0.0510673779973728
2008224	17	0.0249274261734774	0.0498601709621479
2008224	18	0.0222069502804876	0.0416194842382992
2008224	19	0.0203564351937306	0.0350907436020762
2008224	20	0.0193903268848963	0.0353809599381761
2008224	21	0.0174891232197887	0.0363176012788537
2008224	22	0.0166576312976462	0.0375798434303024
2008224	23	0.0163209674383501	0.0355199174718695
2008225	0	0.0149630959848057	0.02993114390185
2008225	1	0.0135887940615711	0.0248175432606159
2008225	2	0.0107467102866788	0.0187866366550215
2008225	3	0.00850574344314656	0.0139665803985037
2008225	4	0.00920743339330325	0.014093353687485
2008225	5	0.0142010611717489	0.0184922665986334
2008225	6	0.0155037262136546	0.0188595272796632
2008225	7	0.0144775549328825	0.017455818044867
2008225	8	0.012506312398306	0.0155109032975966
2008225	9	0.0103764211455338	0.0133817401102146
2008225	10	0.00891194353435092	0.0118504774092956
2008225	11	0.0101152316188456	0.0166809686373727
2008225	12	0.00863580227947665	0.0161985126898091
2008225	13	0.0125243012806655	0.0295868223170355
2008225	14	0.0192821120472535	0.041525177486049
2008225	15	0.0196005444095272	0.0361331954881795
2008225	16	0.0184151811844315	0.029818143675527
2008225	17	0.0174751057541105	0.0276176002262751
2008225	18	0.0196047356245752	0.0333033993811899
2008225	19	0.0114391555951331	0.0243181517258875
2008225	20	0.00288093105983632	0.00668801767598946
2008225	21	0.00196813374788799	0.00620938546736323
2008225	22	0.00651224437208361	0.0249321529151541
2008225	23	0.025244616885302	0.0694928899178642
2008226	0	0.048619182089123	0.121328411708394
2008226	1	0.0548101901901469	0.120673724174636
2008226	2	0.0552788911080783	0.110464727383303
2008226	3	0.0597440549181108	0.144592064181313
2008226	4	0.0668079498396308	0.199907819471488
2008226	5	0.0785994914090505	0.234105037681269
2008226	6	0.0924885746201606	0.287322349943458
2008226	7	0.0917616960052325	0.29137833360137
2008226	8	0.0826268694176207	0.274916298195165
2008226	9	0.0712847810107216	0.249609290818273
2008226	10	0.0756885986222405	0.290073903300733
2008226	11	0.117858503782021	0.536496363449061
2008226	12	0.146611543128937	0.653812286977455
2008226	13	0.15531940008472	0.691494336897526
2008226	14	0.15051309977813	0.612514089686187
2008226	15	0.151621267766028	0.613343814200395
2008226	16	0.155954100593689	0.587003816208223
2008226	17	0.15226167029221	0.48672159671779
2008226	18	0.149378571140839	0.431160767572908
2008226	19	0.151343092090829	0.407986328287199
2008226	20	0.145758989739912	0.338059729908136
2008226	21	0.106442116482029	0.24636632139447
2008226	22	0.0712661569134776	0.227548250771706
2008226	23	0.0721946255271213	0.245617531827114
2008227	0	0.0796162129948988	0.24568010110926
2008227	1	0.116190335990223	0.301969044846486
2008227	2	0.215886330649694	0.539504171305534
2008227	3	0.286830730791142	0.594439737227832
2008227	4	0.291025520766045	0.540135555342041
2008227	5	0.282718221967319	0.472877183955129
2008227	6	0.251429346970771	0.423651792313292
2008227	7	0.211783110226646	0.418911603729727
2008227	8	0.185640690568854	0.432547937459218
2008227	9	0.170131569716392	0.430188652804092
2008227	10	0.160282401392962	0.415407955279737
2008227	11	0.147073613778822	0.352034785435723
2008227	12	0.131539502053344	0.289406506037111
2008227	13	0.116285240245247	0.240957387297706
2008227	14	0.106725642471008	0.204554831986997
2008227	15	0.101918655727496	0.179316501722608
2008227	16	0.0970407105491033	0.162057696876209
2008227	17	0.0961262075779273	0.158786258710975
2008227	18	0.0998088411926991	0.168807190703154
2008227	19	0.108446629466411	0.177025390763795
2008227	20	0.109345698278372	0.159660273758332
2008227	21	0.107959425330654	0.152006774316206
2008227	22	0.105790552865736	0.145933556716421
2008227	23	0.104304414329759	0.142752681600192
2008228	0	0.101356546879965	0.13611998506968
2008228	1	0.0987395198231355	0.129914991696573
2008228	2	0.0961731228085507	0.124741814326304
2008228	3	0.0924064925903807	0.118715955127033
2008228	4	0.0885929987206679	0.114049298907337
2008228	5	0.0947952285319638	0.131473367740658
2008228	6	0.106756036193706	0.162622626415078
2008228	7	0.101173930969661	0.160760654595159
2008228	8	0.100752128024792	0.205455080792761
2008228	9	0.101882339575993	0.252790915636523
2008228	10	0.0969771883394704	0.262599436037709
2008228	11	0.088844612289285	0.255498147625188
2008228	12	0.0793779775913538	0.230108518701094
2008228	13	0.0685656526941683	0.196025547424937
2008228	14	0.0515546666311825	0.141049438875054
2008228	15	0.0276905618118446	0.0709672492320497
2008228	16	0.00948408636731853	0.0226913045538434
2008228	17	0.00994113330826242	0.0212854802648352
2008228	18	0.0111776252469636	0.0213089362962061
2008228	19	0.0140937446042864	0.0256526551216177
2008228	20	0.0201960845156673	0.0386160970699747
2008228	21	0.0253873582726448	0.0500690281719755
2008228	22	0.0291776051275843	0.0591365552802768
2008228	23	0.029791789447157	0.0581377078742406
2008229	0	0.0294976306321414	0.0565737392330584
2008229	1	0.0307085767650179	0.0580876271740779
2008229	2	0.03217736049841	0.0623526081104555
2008229	3	0.034416076105402	0.0692229722679344
2008229	4	0.0359040624299205	0.0743987279498079
2008229	5	0.0365912212726678	0.077592600087974
2008229	6	0.0523306947761322	0.150148788642427
2008229	7	0.0598332944986572	0.183678380431122
2008229	8	0.0739603052219007	0.279167381326852
2008229	9	0.0764341884058618	0.310199215122727
2008229	10	0.0752177941658435	0.313068015226912
2008229	11	0.0728169673077906	0.297367325558295
2008229	12	0.0699695567016728	0.274752125043686
2008229	13	0.0673365358290076	0.254780020545598
2008229	14	0.0647601066606178	0.230381946503027
2008229	15	0.0622199742834515	0.204201816270468
2008229	16	0.0586226873081079	0.177033579072697
2008229	17	0.0542423378296492	0.148633252469794
2008229	18	0.0529329817580928	0.133497683111085
2008229	19	0.0552737605666327	0.128373066764992
2008229	20	0.0595823505977439	0.127819709152243
2008229	21	0.0578632611112589	0.112877404309468
2008229	22	0.0555136073345739	0.108945229070796
2008229	23	0.0569055013771752	0.118473074548779
2008230	0	0.0590157975959937	0.128259150369126
2008230	1	0.0613912185076555	0.132925121180418
2008230	2	0.0628637060934454	0.134532803234307
2008230	3	0.0663388283808837	0.13948243223036
2008230	4	0.0722553206377245	0.143702931897171
2008230	5	0.0742362205571549	0.138380286860584
2008230	6	0.0713466743389639	0.1343434760397
2008230	7	0.0724690588267715	0.145614604180494
2008230	8	0.0670717209219068	0.145693990148491
2008230	9	0.0747783422315024	0.190880128091843
2008230	10	0.0676689355899729	0.175404882872782
2008230	11	0.0551218207752695	0.152282749405134
2008230	12	0.049855288759395	0.160069091577078
2008230	13	0.0484614405637803	0.161783327865872
2008230	14	0.0460068088465523	0.143414444671973
2008230	15	0.0439696832074798	0.12584779233151
2008230	16	0.0430998647740885	0.112642733004274
2008230	17	0.0444818818397784	0.100367655353164
2008230	18	0.040465249553125	0.0873460965122491
2008230	19	0.0363389835251203	0.0758905708222402
2008230	20	0.0340162977708356	0.0690546423556057
2008230	21	0.0322010422763867	0.0640206637564846
2008230	22	0.0307715386347214	0.059345471476517
2008230	23	0.0320740321301303	0.0629112446628018
2008231	0	0.0291562969180553	0.0525461417644109
2008231	1	0.0243423155682736	0.0386494990575826
2008231	2	0.0168538462424206	0.0233506552591754
2008231	3	0.0123274747272576	0.0160165983909064
2008231	4	0.0112256698227141	0.0142207999516145
2008231	5	0.0114419816433383	0.0146983258097646
2008231	6	0.0134759796093194	0.0183918451827143
2008231	7	0.0180028202949664	0.0267884052713652
2008231	8	0.0186615843882564	0.0260118563920811
2008231	9	0.0180587783396615	0.0236097698677304
2008231	10	0.0183210489093802	0.0242993876492884
2008231	11	0.0190044768966727	0.0356297243434261
2008231	12	0.0255679775565156	0.0948143108424867
2008231	13	0.0531006363844084	0.197435773675966
2008231	14	0.0864088220679799	0.252718777079429
2008231	15	0.0970943067947775	0.238429022872
2008231	16	0.0992587792598813	0.216043595096953
2008231	17	0.10460308105654	0.202031713203503
2008231	18	0.101979616274136	0.169422536282342
2008231	19	0.0986795274594879	0.151405362612398
2008231	20	0.0968338405577984	0.143428826447206
2008231	21	0.095926319598271	0.135258475578269
2008231	22	0.0967715999140739	0.127064674691668
2008231	23	0.0934690117561971	0.117120365786317
2008232	0	0.0883479122690211	0.107466974694939
2008232	1	0.0799501039197095	0.0947414335557017
2008232	2	0.0672054285471354	0.0780961936676883
2008232	3	0.0503625196427155	0.0575936792130139
2008232	4	0.0344576144825438	0.0394943915521965
2008232	5	0.0227628518161371	0.0266420554141166
2008232	6	0.016097223885474	0.0193584949348441
2008232	7	0.0232971582030373	0.0285846625570592
2008232	8	0.0378804479395336	0.0443309749803755
2008232	9	0.0592357464277595	0.0706589622282621
2008232	10	0.0706420048853766	0.134055201276339
2008232	11	0.0663667845153817	0.158518737235269
2008232	12	0.0553305142363557	0.119980879129322
2008232	13	0.0457314178705334	0.0812549055655271
2008232	14	0.0407215996153798	0.0608203444916455
2008232	15	0.0371260969867666	0.05083055891337
2008232	16	0.0343723075276712	0.0452305243837233
2008232	17	0.031254057194649	0.0395103486081358
2008232	18	0.0259289199414906	0.0318381454774868
2008232	19	0.0202042237456769	0.0261668246500264
2008232	20	0.0209004026534972	0.0345448210439679
2008232	21	0.0245683021061825	0.0673071486575322
2008232	22	0.0297864040211192	0.0989675385565638
2008232	23	0.0381822643332368	0.12109224278473
2008233	0	0.0497239398507771	0.142543547070561
2008233	1	0.0614131363581805	0.155593197423993
2008233	2	0.0687219738452925	0.162014963603364
2008233	3	0.0836644493391041	0.206352504212257
2008233	4	0.0975390523505148	0.222799888687633
2008233	5	0.0968348809886701	0.172665808891321
2008233	6	0.0802297831047133	0.111761407491867
2008233	7	0.0667674014701611	0.088323043118878
2008233	8	0.0689795708322041	0.166504329943303
2008233	9	0.0794599525031042	0.315979540098379
2008233	10	0.0778891794816242	0.359988788077158
2008233	11	0.0736194138359927	0.338921685062989
2008233	12	0.0719736891455853	0.325199562963477
2008233	13	0.068821224623034	0.294649557297377
2008233	14	0.0617000566977492	0.251660340423255
2008233	15	0.0568565624631107	0.217352810332094
2008233	16	0.0542945053336124	0.180221930630041
2008233	17	0.0484815976385016	0.141232609191803
2008233	18	0.0363168331417976	0.0942671787829307
2008233	19	0.0368054445792642	0.0971494524762361
2008233	20	0.0583726876734258	0.19802252239221
2008233	21	0.0686291770921385	0.314106844077835
2008233	22	0.0687422057344095	0.337524267546501
2008233	23	0.0671653748737042	0.33059656842422
2008234	0	0.0718772764091794	0.374230299153866
2008234	1	0.0761386589005564	0.38526469958829
2008234	2	0.0762233818496192	0.350723981107704
2008234	3	0.0740116237493829	0.31364148836064
2008234	4	0.0672851847719939	0.268719503700121
2008234	5	0.0612576323289845	0.227269545715824
2008234	6	0.0571221233901082	0.18472141639896
2008234	7	0.0547434569166876	0.16118097745443
2008234	8	0.0530860475571778	0.161751127998769
2008234	9	0.0569567089278529	0.205706630706609
2008234	10	0.0600924655418844	0.226061145942222
2008234	11	0.0623677668791971	0.22294130531878
2008234	12	0.0627845196821121	0.213495323190513
2008234	13	0.0615115567866628	0.206723715592484
2008234	14	0.0600798881572639	0.200515971903289
2008234	15	0.0584040561784284	0.183225116365147
2008234	16	0.0570486911834031	0.160808460799356
2008234	17	0.057689282278586	0.12916734551033
2008234	18	0.0519614707474273	0.0862924561864441
2008234	19	0.0458620550698697	0.067351913053398
2008234	20	0.0438717456083686	0.0606490214466653
2008234	21	0.0442625074286036	0.0588785872818737
2008234	22	0.045186766761154	0.0576698063707308
2008234	23	0.0463401460107379	0.0574759573635131
2008235	0	0.047422559293253	0.057719896872609
2008235	1	0.0483854267780006	0.0590180663575453
2008235	2	0.0501790192939162	0.0630142834577646
2008235	3	0.0500565506315376	0.0632828609745773
2008235	4	0.0488531018044262	0.061394403071482
2008235	5	0.0480181616965479	0.0595449714584677
2008235	6	0.0473154967752005	0.0576414933413173
2008235	7	0.0452674426494645	0.0555790542494075
2008235	8	0.041501462293866	0.051980129964128
2008235	9	0.0346659510032825	0.0535222790602344
2008235	10	0.0426202609448674	0.137749526569292
2008235	11	0.0407432120636094	0.13864075189835
2008235	12	0.0389395274879187	0.125102686652294
2008235	13	0.0382399312653772	0.111306898521186
2008235	14	0.0364885718731535	0.0956648627278169
2008235	15	0.035243132340732	0.0832870005687767
2008235	16	0.0347340878793736	0.0672355259005467
2008235	17	0.0308457236794397	0.0493248239217891
2008235	18	0.0315439203246109	0.0463513716585092
2008235	19	0.0333349550848343	0.0459089332736817
2008235	20	0.0349882540834069	0.052377472402205
2008235	21	0.0336846003775651	0.0550954448764772
2008235	22	0.0211839623762621	0.0397022410001116
2008235	23	0.00548874954822049	0.0109069343560606
2008236	0	0.00161876273623832	0.00342514871081378
2008236	1	0.00106381935593236	0.00300533969961015
2008236	2	0.00151165704284244	0.0074449785871819
2008236	3	0.00427115062101647	0.0249525642166329
2008236	4	0.00779954269630369	0.0328349356008328
2008236	5	0.0105291441448737	0.0373971081280419
2008236	6	0.0206002721660161	0.0560050761411826
2008236	7	0.0372027343168446	0.0954841971155493
2008236	8	0.0439658556945171	0.125882110353136
2008236	9	0.0470892283493777	0.158862782924544
2008236	10	0.0506792942148166	0.188915323166152
2008236	11	0.0461087285313358	0.177052254230923
2008236	12	0.0363267458501951	0.160017129168516
2008236	13	0.0311886844480243	0.149661126503239
2008236	14	0.0417082633231556	0.213917577662692
2008236	15	0.0480007820891241	0.229203498055165
2008236	16	0.0398789511316162	0.168118668371182
2008236	17	0.0338142851527307	0.131394157451507
2008236	18	0.0433438174432284	0.208930515469381
2008236	19	0.0666249595603609	0.342863933806637
2008236	20	0.0827972582840436	0.385753999015824
2008236	21	0.0828612719215952	0.35503218242204
2008236	22	0.0743429512008182	0.287551277919372
2008236	23	0.0526244170109	0.191147055306495
2008237	0	0.0226386982993817	0.0705898268702694
2008237	1	0.00859861849330861	0.0272636293223222
2008237	2	0.0135935950319504	0.0403740181682875
2008237	3	0.0334929654557096	0.107324295024069
2008237	4	0.0328235054453773	0.113391131343034
2008237	5	0.0191369186632221	0.075979509507932
2008237	6	0.0126430007255312	0.0687958225397927
2008237	7	0.0239540414520034	0.134312699367691
2008237	8	0.0358969673659995	0.165253210910493
2008237	9	0.0452796548435551	0.179123133645606
2008237	10	0.0500612340037735	0.183232877280512
2008237	11	0.0517869273617173	0.19205509827755
2008237	12	0.0546473847111871	0.232074458229228
2008237	13	0.0560385498796526	0.261728139614664
2008237	14	0.0568096494973934	0.275391548861913
2008237	15	0.0573357254364878	0.261962097416014
2008237	16	0.0550352309612085	0.227200943319916
2008237	17	0.0501967893816732	0.180398473065811
2008237	18	0.0478347661519825	0.132181555582427
2008237	19	0.0389352523075965	0.0785525767769312
2008237	20	0.0316085858859514	0.056327310058302
2008237	21	0.0272755086804464	0.0462648792562575
2008237	22	0.0247009786713378	0.0400403559709888
2008237	23	0.0231030007062822	0.0359552041975483
2008238	0	0.0216991623965309	0.0326305818766705
2008238	1	0.0204640513051369	0.0295556774615965
2008238	2	0.0192508275820102	0.0267318625259652
2008238	3	0.0181728838994262	0.0244796281213997
2008238	4	0.0170550258669811	0.0227337242373821
2008238	5	0.0159394217691779	0.0214834697050411
2008238	6	0.0155914921121055	0.0214535727127847
2008238	7	0.0159262826832502	0.0227257850746632
2008238	8	0.0161255154179736	0.0240541595467763
2008238	9	0.0158438140364763	0.0239413509343496
2008238	10	0.0157410837455311	0.0242716777203097
2008238	11	0.0167229873056815	0.0266161735262412
2008238	12	0.0168685122671427	0.0271074296758172
2008238	13	0.0170586447183098	0.0271114052603492
2008238	14	0.0189262545138952	0.0306800721742221
2008238	15	0.0203349546703452	0.0353604719193741
2008238	16	0.022416241201843	0.0427245233556076
2008238	17	0.0235390896509396	0.0480662094065125
2008238	18	0.0232392785821515	0.0505060216772112
2008238	19	0.0227200787345934	0.0513625980895353
2008238	20	0.0230602717143551	0.0556890950099512
2008238	21	0.0195203869493607	0.0532437690220207
2008238	22	0.0155190505866096	0.0401735239357298
2008238	23	0.013051497408207	0.0299563924101716
2008239	0	0.0149065319973643	0.0325820089591981
2008239	1	0.016096749609568	0.0372876354585756
2008239	2	0.0162681447577988	0.0477270872013631
2008239	3	0.0197773484318121	0.0867854430346645
2008239	4	0.0262249738522136	0.111237318019989
2008239	5	0.0267113391278879	0.0830027887287463
2008239	6	0.0267222545338646	0.0683972255683303
2008239	7	0.0311632462404131	0.077707479319668
2008239	8	0.0352430197166675	0.0841823819998946
2008239	9	0.0332557460446385	0.0783876056768819
2008239	10	0.03361066697638	0.0783555114050119
2008239	11	0.0334181858861491	0.0787931884217419
2008239	12	0.0304792869293641	0.0923648500180546
2008239	13	0.0899861425942178	0.498904020790186
2008239	14	0.103962711626606	0.515409434935092
2008239	15	0.0937451565905233	0.395566685473502
2008239	16	0.0800927263991144	0.285205934623269
2008239	17	0.0784576611386746	0.220007057585219
2008239	18	0.0789957937186309	0.170091579869961
2008239	19	0.078710417190342	0.152233073632835
2008239	20	0.0775629439005133	0.143022603884248
2008239	21	0.0748157467269906	0.132288521903369
2008239	22	0.069164042483398	0.122976652140143
2008239	23	0.0678637344228226	0.127944575243499
2008240	0	0.066408928826408	0.133267321510313
2008240	1	0.0668130481050676	0.146210631866603
2008240	2	0.0666140197206919	0.147855383380984
2008240	3	0.0647030123530122	0.137118458798729
2008240	4	0.0620521359737236	0.128083611654352
2008240	5	0.0595668770721151	0.124629413393966
2008240	6	0.0563089094655515	0.125898500574446
2008240	7	0.0606535698750593	0.156307476328235
2008240	8	0.0644360847687496	0.174558603534732
2008240	9	0.0678517546586609	0.184229530886722
2008240	10	0.0573856921917877	0.151945087354652
2008240	11	0.0523684390939971	0.139036014257533
2008240	12	0.0482765732501637	0.129757838344435
2008240	13	0.0452598537265188	0.118826617978154
2008240	14	0.0434765982302746	0.109612919209472
2008240	15	0.0425158599824003	0.09731554712057
2008240	16	0.0407941234650289	0.0814858142868261
2008240	17	0.0399761682827409	0.0730453030559351
2008240	18	0.0431829433916318	0.0761046037028154
2008240	19	0.0386073160219358	0.0726864292747141
2008240	20	0.0304948987615287	0.0497161367021778
2008240	21	0.029639922559313	0.0485485832570809
2008240	22	0.0359826336795487	0.0630093770489405
2008240	23	0.0444906779652817	0.0861459293116896
2008241	0	0.0472730875820235	0.0944093611229454
2008241	1	0.0465497533127703	0.0905185988905335
2008241	2	0.043000511401938	0.0774502794023798
2008241	3	0.0375243090373516	0.0625521297346023
2008241	4	0.0326074701202514	0.0539507712609801
2008241	5	0.0290878448442785	0.0479244239634542
2008241	6	0.0290369099042927	0.0525561297790945
2008241	7	0.0294495937141215	0.0550032098177271
2008241	8	0.0305718263565301	0.059861216090806
2008241	9	0.0317627393182557	0.0641812229452928
2008241	10	0.0304509100953675	0.0633700229067058
2008241	11	0.037345416473328	0.0919646271776245
2008241	12	0.0438443790901302	0.118786337550658
2008241	13	0.0475473559528053	0.136934908488633
2008241	14	0.0523961188202954	0.160458222447515
2008241	15	0.0600415834734673	0.188452469070883
2008241	16	0.0561514168436152	0.173595594977325
2008241	17	0.0523906138946097	0.150983506323638
2008241	18	0.0488807933428436	0.125490985587009
2008241	19	0.0504286178846664	0.107595004332656
2008241	20	0.0556785391491181	0.0952189793173354
2008241	21	0.054704227696957	0.0840850052410525
2008241	22	0.0530322067775909	0.0836211804635005
2008241	23	0.0478794236418149	0.07914866861797
2008242	0	0.0395477722566873	0.0737604769630482
2008242	1	0.0380118547569229	0.076293560929256
2008242	2	0.0398671207041765	0.0906262136361801
2008242	3	0.043314138535902	0.123646148127779
2008242	4	0.0473008153105626	0.141655591627708
2008242	5	0.0510131720104369	0.152593082652953
2008242	6	0.0418805252852129	0.115348371839107
2008242	7	0.0344187004864073	0.082378014676091
2008242	8	0.0451821406308295	0.11748948116632
2008242	9	0.0618162004635076	0.215262701565033
2008242	10	0.0556511350760383	0.207250458230345
2008242	11	0.0347041247464045	0.149831537703795
2008242	12	0.0250229716057837	0.0976830815548142
2008242	13	0.0236708970738968	0.0793781890576974
2008242	14	0.0258043432013406	0.0735950866560198
2008242	15	0.0326912775366985	0.0817903739890527
2008242	16	0.0434253936370289	0.10492394562768
2008242	17	0.0510929366126727	0.121587450420457
2008242	18	0.0540461228182435	0.12559047690182
2008242	19	0.0545279573586154	0.122986799409119
2008242	20	0.0561914319111748	0.12709272252605
2008242	21	0.0608735285727629	0.137208155937424
2008242	22	0.0655761545940557	0.133159650150819
2008242	23	0.062726857226836	0.11334429523497
2008243	0	0.0587718966853766	0.0993772309509016
2008243	1	0.0558048413112345	0.0900098284627818
2008243	2	0.0533584585146175	0.0843967928780188
2008243	3	0.051549232598607	0.0807146451213937
2008243	4	0.0495447852017061	0.0754362878200249
2008243	5	0.0471692127057723	0.0704309041580994
2008243	6	0.0466219555454968	0.0809653801884459
2008243	7	0.0540862927130543	0.149703272431844
2008243	8	0.0641524899449076	0.250382314776569
2008243	9	0.0739549747887785	0.334059128970924
2008243	10	0.0670668580446417	0.273688832794509
2008243	11	0.0593890307021988	0.21774695516258
2008243	12	0.0545278656776252	0.181887733309916
2008243	13	0.0506246964403464	0.153117539584876
2008243	14	0.0470753951455436	0.128982389941834
2008243	15	0.0441973089534031	0.10941840617145
2008243	16	0.0435954656849146	0.0939925946242373
2008243	17	0.0359921623635914	0.0721220731635774
2008243	18	0.029807027962806	0.0602505861442535
2008243	19	0.0252759479157494	0.0482490227027073
2008243	20	0.0221215034684453	0.0389767878359134
2008243	21	0.0201606819531237	0.03375930195385
2008243	22	0.0187075550918896	0.0302094834394004
2008243	23	0.0173594174663077	0.027121573459848
