# Supplementary material for: A comparison of sea salt emission parameterizations in northwestern Europe using a chemistry transport model setup
Source: Copernicus journal article supplement (doi:10.5194/acp-16-9905-2016), 2016-08-08
Supplement: Supplementary file 2 [file acp-16-9905-2016-supplement.zip › conc/conc.timeseries.values.sum2008.base.Na.moreStations.csv]

doy	hour	DE0001R	DE0002R	DE0003R	DE0007R	DE0009R	DE0044R	DK0003R	DK0005R	DK0008R	DK0031R	FI0009R	FI0017R	NO0001R	NO0056R	PL0002R	PL0003R	PL0004R	SE0014R	NL0011R
2008183	0	1.55683792041888	0.0387128649771833	0.0269971682461645	0.0550234051629031	1.10635226239346	0.0487537912765921	1.52895553170722	1.49461578459371	2.0305513801242	1.72253755368771	0.132021022872661	0.272707659414735	0.206646003027602	0.0255452177937565	0.0265950261285314	0.0321133233589205	0.51499955330175	2.32414349026786	0.106737627200651
2008183	1	1.47414508910221	0.0369395272346	0.0253004713741927	0.0529329541623621	1.14831268638601	0.0463974332368542	1.34404010257453	1.49317989379398	2.09488782501412	1.57196606717482	0.112493370608066	0.285022798740354	0.16258379328929	0.0381415322459458	0.0269290190405269	0.0315206117107722	0.537437567594094	2.44598412018985	0.0925689232767343
2008183	2	1.39512008227844	0.0358286811542185	0.0236870157966619	0.051052782788602	1.16274027967994	0.043300945939426	1.12081735806361	1.50371514933321	1.8621121396984	1.52352796587148	0.130172147743762	0.304944393488302	0.177726437101502	0.0489957682815256	0.0274496617707776	0.0306754096321716	0.618025850193502	2.70828290659444	0.0800241130829525
2008183	3	1.30893065141554	0.0354682127010362	0.0223629283622388	0.0490794486100877	1.16062279845824	0.040634345237916	0.949981171797708	1.51909120791841	1.57558020919592	1.49476730093047	0.155238672898604	0.301440442686932	0.220991510424248	0.0522341015727256	0.0279872549773658	0.0299122194788128	0.647813427311672	2.71435099818387	0.0717374082455795
2008183	4	1.20161732326753	0.0354040294635099	0.0214865108128349	0.0472379521793998	1.15362377040802	0.0383411690788567	1.04636526823536	1.56040913658783	1.56430709226694	1.36747781660515	0.231023630608961	0.253091140664524	0.367677356011346	0.0626591191528426	0.0295402500543754	0.029442397276654	0.691459124069616	2.59928606815153	0.0663031119966455
2008183	5	1.05806300943673	0.0349461951132884	0.0230333042459971	0.0443762970220854	1.13990396196166	0.0392845493443641	1.13170322777951	1.63121204866697	1.55373138257984	1.22552282985416	0.248019757242167	0.241578172012553	0.630931452971837	0.0837043409448591	0.0359776955372322	0.0285252133416367	0.84113041331364	2.46227410471066	0.0776285925337848
2008183	6	0.906193642981673	0.0573388309555549	0.0250857691373318	0.0755399657951169	1.14576909512276	0.0396508764397491	1.09588626322345	1.74067909272989	1.4977639792866	1.14520607758019	0.202974757981887	0.113271172588241	0.77976390684516	0.0809492513656263	0.0461575340502104	0.0319939501918947	0.977182436623194	2.33879654467328	0.082618690522594
2008183	7	0.796439165451775	0.0680512679870278	0.0283272198119618	0.141094375345977	1.13073596971758	0.0362675295965785	0.987072064792112	1.8606207186757	1.40122208603954	1.06378052251051	0.172564880512877	0.0939978959311898	0.653261003405257	0.0439912132572972	0.0626594702567835	0.0420497044457042	1.04712335779972	2.31791872463951	0.0788680223305292
2008183	8	0.736186536982621	0.0728311392757166	0.0251653867370291	0.16820380339963	1.09290968632033	0.0420925329695777	0.805655905508683	1.95874149957914	1.30179421794823	0.971173705009311	0.153211479787744	0.0869256250187164	0.529618868661607	0.0233435001628588	0.0910170041555091	0.0427289748693646	1.09732466835414	2.34368636940147	0.0744510267762803
2008183	9	0.700710923285941	0.0588190686925564	0.0205184671029177	0.138908034453708	1.06762239271032	0.0462999346935253	0.57638521705558	2.00262834113818	1.16762112496818	0.887509261460001	0.145954768920625	0.0702322430547165	0.397695854912296	0.0250162056519642	0.18186565332565	0.0392313062309155	1.06294981652409	2.28784308200594	0.0766525407503624
2008183	10	0.698283341865768	0.0504024953354431	0.0151131376624456	0.127277673406452	1.05915705353998	0.0430683590942028	0.429337127450498	2.07116418488519	1.02469269595225	0.793033904426697	0.139209347540836	0.0714029337205662	0.311744912262138	0.0498044884316138	0.265743449469747	0.0335124700638049	1.01185308573016	2.09219754796358	0.0776832224134078
2008183	11	0.771176509861568	0.0435391000756693	0.0102077992543613	0.117634223249012	1.05339076228133	0.0385928539420496	0.341617323721742	2.17994260466894	0.884840619878045	0.735080189293173	0.130224434618501	0.078173113143985	0.266152238723994	0.0563506785956882	0.301453928342134	0.0304656597753676	0.96619560502783	1.75860075578853	0.0713240715070253
2008183	12	0.900050864217703	0.034633232680194	0.00813085275107633	0.104670024991003	1.04505374496887	0.0340720807376684	0.264619788796351	2.34432999575223	0.772568877958423	0.7059393063809	0.124676493575026	0.0766122140814471	0.245807598643293	0.0478271782471595	0.298662229224955	0.0262415521550955	0.923531787617921	1.42666940204426	0.059843705616661
2008183	13	1.03059041749462	0.0281004202234478	0.00740143250624952	0.0926883896488593	1.03074041119897	0.0295284185973184	0.226508798404263	2.57059791303712	0.705698174918118	0.694266697580714	0.116448239074494	0.0779073975119109	0.230714675508891	0.0352867972800976	0.282986485632284	0.0223683495396411	0.894778999072867	1.21325979272251	0.0496489089892229
2008183	14	1.06152958788173	0.0236627285515519	0.0067426789249599	0.0836731509127607	1.02102902357859	0.0258898167906387	0.205076380539169	2.7483307044762	0.692196706274124	0.690810742162687	0.119099929354353	0.077811851994342	0.214729779898641	0.0261168957991354	0.259861679970912	0.0193865372495229	0.866199653807923	1.12159172906641	0.0447531258034263
2008183	15	0.898892936011024	0.0205180442458072	0.00611090709381505	0.0753946403732051	0.997415487897355	0.022912696893952	0.192214755551476	2.64245847411657	0.722892944500863	0.695110449033219	0.118761764210632	0.0809140213727032	0.197884527458498	0.0203322663234976	0.241994979492064	0.0170911481454578	0.807098253587246	1.10914358666299	0.0404920477547
2008183	16	0.809922405992375	0.0183785363449606	0.00563442800128138	0.0656454419417608	0.944996221148291	0.0205943603365482	0.183216700677221	2.33604770022934	0.799274320597273	0.699582696293302	0.114531606996669	0.0848260049089976	0.181004251507417	0.0160604137109017	0.226582010604555	0.0153326034699649	0.734246511280708	1.13462319128187	0.036146979639341
2008183	17	0.929714206849306	0.0170869662697292	0.00511332758190003	0.060515176538353	0.897503383151452	0.0189478082584575	0.170377677483254	2.14567420668429	0.878590402375776	0.663153424957675	0.112931439047497	0.0816448583288023	0.167186553038645	0.0129247791260379	0.22502134525458	0.0142410913664284	0.656989336647441	1.1999070718656	0.0321849310242723
2008183	18	1.07807007706207	0.016404549036539	0.00462417909788573	0.0452418809927753	0.858303289952339	0.0174137951701686	0.172419683413784	2.07113725254714	0.978050056510747	0.545247889343148	0.111669265680141	0.0761448825962619	0.163978136700486	0.0106469372126908	0.212135766584596	0.0119125201436405	0.590412847624555	1.32398240881861	0.0278207067141741
2008183	19	1.05179724904524	0.0158556691653927	0.00403080212440512	0.0374381200363725	0.85130638312739	0.0156915200119503	0.155787604178971	1.85573958728393	1.08242373309297	0.56976923713702	0.108685383756067	0.0660946332877628	0.175842514686972	0.0143230746420197	0.121859367175824	0.0104711180965305	0.532606229075713	1.56242491497332	0.0237855929044691
2008183	20	0.992378056526172	0.0150600920039417	0.00365182858341515	0.038363256144311	0.856656184544854	0.0168250077650598	0.174867191050627	1.72798663279065	1.11966669345205	1.14000797480825	0.0995962526644473	0.0557112839856535	0.198493705147498	0.027840360115804	0.110259301836176	0.0099693680728861	0.482192664338545	1.84699443671409	0.0192473143176269
2008183	21	0.974048139156539	0.0146817686039304	0.00333742787815497	0.0455946181521806	0.885761922943186	0.0187357522905759	0.395329626094643	1.76063149854195	1.0979229254866	1.69682823946984	0.091241359631811	0.0455675591718284	0.237883238709128	0.0348236505060182	0.103105717410551	0.0100723462017308	0.459394889102441	2.24692720400107	0.0143187364176267
2008183	22	1.11707537017488	0.0155064210746138	0.00302858554714303	0.0721179394445323	0.966980329269916	0.0203591501213622	0.695576817949763	1.75448317996446	1.101229245389	1.51483869830318	0.0901081249214638	0.0363521677006638	0.294115913979662	0.0361830439300314	0.0976772232244296	0.0109233293620378	0.465240279355731	2.72911284971386	0.010333632232466
2008183	23	1.22157664098477	0.016670214428897	0.00272479167830662	0.10612726166241	1.06936451303649	0.0218329616380239	0.946778380229285	1.50907908782119	1.05561276078277	1.14688564692844	0.102408704305488	0.0299372885341622	0.39879472296373	0.0364977356345359	0.0932926303370118	0.013932583386972	0.492044719600268	3.0698703653451	0.00806381396303513
2008184	0	1.25597724584268	0.0185799191703124	0.00271360934181572	0.117400481657954	1.16569160587815	0.0226515018607535	1.14321514298274	1.30318059743347	0.982152838758033	0.871722083126321	0.133280503764087	0.0261542924673619	0.618410777782453	0.0366389090011954	0.0878367288479108	0.0166496966169367	0.520373151081841	2.92557403467308	0.00716261250959431
2008184	1	1.16674861048129	0.0234670004275401	0.00238079847970718	0.111922481636931	1.2508073566642	0.0225798624403305	1.2744818216834	1.11171080086501	0.991205407463151	1.01196935113181	0.158555810224353	0.0236799798431524	0.927739302138878	0.03676745885849	0.0822031290549392	0.0209053212799538	0.541136664826495	2.85133370044961	0.0068061905722805
2008184	2	1.0807608034588	0.0323141287650133	0.00206465226064929	0.0960854054712825	1.32356223871811	0.0211860545942012	1.34065855792347	1.05138443411485	0.98239541451055	1.17392074101625	0.167770718493608	0.0217165259210158	1.36356391765554	0.0368674220455027	0.0778044762578012	0.025000670729388	0.560071448044069	2.72623571690231	0.00671317924921261
2008184	3	0.933472584448315	0.041511696110875	0.00184284203619148	0.0857036594751845	1.28997445783206	0.0191231074311723	1.28110718925364	1.04988136817294	0.948755629022359	1.1970428055983	0.20377539254071	0.0199202756213276	1.82216325211608	0.036893383173925	0.0737803087678203	0.0278061958529855	0.58393259830768	2.41591251579621	0.00671137513192621
2008184	4	0.906860316517212	0.0470024713345578	0.00171550690176307	0.0850521406096169	1.24785990801498	0.0175474820936014	1.13696986508838	1.0534124879419	0.875287414199944	1.16382446745993	0.255882558177823	0.0186676235699415	2.60846152958609	0.0367416620356386	0.0702048785770475	0.028933198621991	0.608458584878931	1.6418738437903	0.00664699407578051
2008184	5	0.887122432019779	0.0486950578868443	0.00167456985012179	0.0855629962986141	1.13128382301428	0.0161943943931447	0.994198704554215	1.04424866638271	0.725632000380679	1.03570904166863	0.316567610057966	0.015720009004894	2.99943738066159	0.0390451195570211	0.065867077112282	0.0361630416021061	0.61687144508354	1.18388917864134	0.00659393568385079
2008184	6	0.782419051882844	0.0468048928494677	0.00202982511439982	0.0952298710693991	1.00076932928314	0.014423003712077	0.823024925203275	0.993852870017536	0.513315201024252	0.809661417189761	0.370884824656287	0.0142912469294772	2.49590099025366	0.041288979516459	0.0975445947495097	0.0353926466238902	0.589838668392204	0.858273502723688	0.00768905770845461
2008184	7	0.695495458998559	0.0402372194945344	0.0025678265716111	0.100045041534684	0.794099983010584	0.0133510425373753	0.606851176303653	0.919885541281292	0.452551793686178	0.609823479504446	0.409293358954853	0.0162091310246765	1.57803804864531	0.0438340102729307	0.113965533068711	0.023871649248996	0.524480026374557	0.662954236269756	0.00865526368046054
2008184	8	0.673816744785233	0.0339975572779726	0.00279537184581336	0.0946829851769431	0.623865742740207	0.0132237432504489	0.48323918130895	0.849505642208156	0.449839520283605	0.382710697867701	0.413587986180994	0.0199761466465692	0.860212022174556	0.030730474769953	0.140639888604591	0.0195117914044944	0.439343444188564	0.480145661864674	0.00910764035226791
2008184	9	0.541473563720729	0.0260338281528652	0.0112658955312945	0.073337015087655	0.496627289583797	0.01506645979847	0.392437458756743	0.737881642621087	0.435588376900948	0.231649801457522	0.401624445128092	0.0425834597192964	0.525509839824444	0.0249704098341408	0.133727419279261	0.0179703306899157	0.359848070742894	0.493813888517887	0.0124595105393027
2008184	10	0.358292800355005	0.0188221262301168	0.0147353359307909	0.0588533241064094	0.435868145504086	0.0150633700462594	0.326992544329632	0.606330478522228	0.39323655014786	0.16982250509041	0.359347942810509	0.0772373044088606	0.333819194361882	0.0241266064939891	0.11459514573127	0.0165162815931156	0.27938027501176	0.561519605908715	0.0177756770204079
2008184	11	0.29811070417254	0.0151861307636834	0.019693006743973	0.0500612685574179	0.43268960922906	0.0140667553381385	0.306635053939598	0.503158528447363	0.34907775424338	0.141276549293495	0.251722291786599	0.0922193434469509	0.292116662786838	0.0265108076328105	0.0927865446615756	0.0152675015705538	0.222620444619903	0.697848084468912	0.0275219303236868
2008184	12	0.304196950219892	0.0129990414150546	0.0200943659258917	0.0434203313987832	0.436306539970599	0.0127821932975874	0.271224188228856	0.442768976428539	0.309596187595126	0.122473633647635	0.182663056778828	0.0870090056441909	0.25724528450674	0.0270948254197188	0.0798541438078516	0.0141421803934612	0.191080851859744	1.02566137109019	0.0399519689033583
2008184	13	0.333584113000844	0.0113175103976237	0.0178524123906911	0.0383332765229689	0.4282453722925	0.0117876807666068	0.245978384230597	0.419726582895328	0.230513123549164	0.120864020553815	0.14431850015174	0.0694829116026939	0.235468765680675	0.025422620758098	0.0716096919408955	0.0130578218830259	0.189467946370917	1.66616310256417	0.0612228149054947
2008184	14	0.373961505355215	0.0103861550972813	0.0177799679964527	0.0338596315987684	0.416212246682175	0.0108815360880693	0.254363471141759	0.419466849543521	0.182157448270565	0.129606767280047	0.134261013466258	0.0446388774825894	0.225914823758572	0.0227066567717637	0.0655634023237308	0.0122745268663186	0.206372945866005	2.41034324577446	0.0887153418941705
2008184	15	0.398176966099387	0.00974766344427218	0.0182805119856106	0.0308487403836053	0.404676591416562	0.0100495436349156	0.269944946138101	0.460677973917626	0.204270153801383	0.142932935133712	0.163208577154932	0.0366766793401932	0.21808056985703	0.0197697993752921	0.0605765436180352	0.0116283486123512	0.239856929060163	3.43049670602311	0.109842281667598
2008184	16	0.458464166964862	0.00941196459780685	0.0180260733017115	0.0292634421158492	0.395243651258297	0.00939231947167246	0.283127703374332	0.496236002845699	0.270835555802917	0.157195660716444	0.244898428950665	0.0316532583391104	0.19982763146899	0.0172779550326543	0.0562522231892811	0.0110974281274094	0.290760983878646	4.34709566909473	0.138024039242993
2008184	17	0.571060585494526	0.00917610826989591	0.0165517006599483	0.0290548296326671	0.369912656143095	0.00893016971953106	0.289059875101551	0.518586299467824	0.336178328853709	0.180662133820099	0.344259193236271	0.0282507209145064	0.18004072178767	0.0155123758020703	0.0536215940565137	0.0107820934779859	0.30876959604485	5.05351919704456	0.226634048069318
2008184	18	0.614470745993704	0.00889079562247668	0.0146727542400572	0.0287084869318846	0.371260957563571	0.00872222372387314	0.285520395367308	0.523828131986062	0.376246332650122	0.211316862306511	0.286580049648782	0.0249288526490591	0.155362023060583	0.0153004495169135	0.0462903923387919	0.0106224400815075	0.281833547478964	5.4081678491217	0.387390583929748
2008184	19	0.668745164358322	0.00815671107735934	0.0121402626789382	0.0261157341519549	0.377105119200165	0.00806717328100222	0.300340393774684	0.535886737291258	0.358108174331247	0.247176432683253	0.246384545658347	0.0222833591269069	0.154446366847856	0.0153507401029592	0.0398919852080485	0.0109839777843814	0.246130434798659	5.33511511736723	0.43489249608434
2008184	20	0.748542624057668	0.00701943757033282	0.00941486404954187	0.0269503954281385	0.446495209696562	0.00697318341195094	0.329208889852839	0.542950573416355	0.3163164805356	0.272208104524592	0.182113220398497	0.0203742181443497	0.140888612001085	0.0154533948733466	0.0399827278022211	0.0132634107093242	0.257729366746709	3.56107128872303	0.4704382548823
2008184	21	0.783937719565401	0.00663456688187682	0.00760440402340847	0.0287600318742102	0.482280165989876	0.00681695010843092	0.345307928778586	0.547705763222708	0.291979390404762	0.294874685547982	0.119291004871367	0.019095092345315	0.210489360081313	0.015726124641241	0.0394224019663558	0.0184913489346388	0.275165597302831	3.68766205990515	0.521286566861945
2008184	22	0.789982446230429	0.00669512810749035	0.00746710756098459	0.0324610146097467	0.470638975277932	0.00710727041119582	0.362793789990156	0.558374556831062	0.281682574415591	0.302250215555081	0.0928743255601573	0.0180625277217872	0.429068554787939	0.0161521821825803	0.0397780010445158	0.025707474601061	0.286333413212884	3.58800322488607	0.548534315354771
2008184	23	0.775216630412925	0.00793238763908429	0.0059392072734502	0.0386266485463571	0.405227495132988	0.00721798027231624	0.381740087550787	0.568519505174622	0.283681226046853	0.312010871600764	0.084482054537438	0.0168728809808297	0.679289989095896	0.0166473739187517	0.0365733467408029	0.0265814063335062	0.281811140873344	2.71994937525929	0.43618986534084
2008185	0	0.735099401838215	0.0101619212065315	0.00476236592146405	0.0423096722859721	0.340553717735086	0.00726116749224435	0.414181458533729	0.570762322114271	0.294616130275264	0.322303118988632	0.0922967590422068	0.0162357994402226	0.70432511865612	0.0171041762906479	0.0328208758539966	0.0272258199990052	0.276242492067936	1.8394553644148	0.345734801498806
2008185	1	0.721181002408184	0.0122125194678997	0.00408604025172005	0.0432278095554255	0.305131773206108	0.00737393362490565	0.447714619017867	0.559257006271103	0.321101948518849	0.328914426194334	0.119353730746026	0.0167521762747921	0.676265691608703	0.0174703728069885	0.0303787975342175	0.0265600813447732	0.273188132907114	1.15677482107574	0.23587005784357
2008185	2	0.753407230723613	0.0136283740236594	0.00386095430671097	0.0445427427027593	0.285846237549369	0.00751195718503383	0.466204252838332	0.553415544371274	0.372959409187768	0.34932227677275	0.152988664794464	0.0143735206525472	0.633427360648658	0.0176851190253094	0.028612207774624	0.0245434005300639	0.269908875732235	0.896135504015818	0.164964000529939
2008185	3	0.790910619351824	0.0143246257457955	0.00448391851338798	0.0475615296956243	0.282199432995412	0.00777140381351006	0.486879992439029	0.546531641499091	0.452549723953452	0.370818876404939	0.170436099559134	0.0190587636773506	0.636952506103846	0.0177236366620997	0.0275088280601246	0.0225897648166206	0.266953419959115	0.733273619589119	0.163197770685576
2008185	4	0.804499434060117	0.0142319111056761	0.00675118771243931	0.0505962170689971	0.288220727718268	0.00787266574392701	0.520146323985501	0.563284913739216	0.536991834745154	0.387489927523772	0.169897577926137	0.0183712120374149	0.647108183579409	0.0173068489322141	0.0267235373200936	0.0209293916593195	0.263113162400694	0.648324764138998	0.158121445334588
2008185	5	0.795548066512698	0.0136607856905347	0.0108502346399284	0.0520587662311204	0.316430133936232	0.00739200146920107	0.560457000023893	0.520953788857838	0.597496669862939	0.399083245696728	0.165339962390611	0.0338179079276786	0.570190168153182	0.0256436957205725	0.0272127604676233	0.0196830460358015	0.255067262213286	0.532898738245586	0.255696594467909
2008185	6	0.693507423977081	0.0128104506122703	0.0181186995829898	0.0529406037215404	0.330811074053636	0.00685021766337291	0.560934265512628	0.526361319768842	0.637541004642569	0.374659613755021	0.164979485267419	0.0361687993154486	0.527342269398576	0.0426796798037232	0.0344527220114772	0.0159814133307257	0.228633883362194	0.390161897014116	0.258807064916859
2008185	7	0.703290446954794	0.0109724489784925	0.0183617989922735	0.0521228805659782	0.376279027976206	0.00656254510060256	0.561604898327905	0.53036468683078	0.580441077922975	0.378855393514712	0.155082903945083	0.0232931044957745	0.416778635461119	0.0487751266605695	0.0352394294964749	0.0112881009450065	0.168633417474318	0.313245525433919	0.13798098972165
2008185	8	0.690620194620409	0.00911504101938359	0.0183761236979284	0.0461269239414946	0.395523556734199	0.00651302133736267	0.553040193045165	0.518893387902548	0.451670401444599	0.333013816277208	0.123071175879334	0.00550646053860322	0.334138762460255	0.0480380712878085	0.0435583070671567	0.0090465014422285	0.150404510111272	0.259596478875102	0.0707631350776493
2008185	9	0.669737535478418	0.00830383483762285	0.0175565677117317	0.0383618723458095	0.37866009851627	0.00661947207940592	0.462280340484477	0.550012298569573	0.337723862804206	0.264361143161717	0.109888412299973	0.00793837262533086	0.299154765754773	0.0468609234280198	0.0433503262854881	0.00797341829831874	0.16078815098682	0.257954023953711	0.119899828534728
2008185	10	0.706523199236656	0.00774459241438197	0.0129880857486207	0.0294552086451838	0.38732593679279	0.0066411504244714	0.384027000573813	0.543287383480831	0.249882719183545	0.240855273206675	0.130111438500991	0.0206524004251546	0.24948238693995	0.0552149795355919	0.042019598663186	0.00718392721099854	0.179257966910199	0.274233329514691	0.156940155857211
2008185	11	0.716820275726919	0.00716971442816208	0.00347427610573888	0.0228494379725193	0.396780009210358	0.0066594334551151	0.341755574452915	0.55680859088978	0.195681353483259	0.220287190190617	0.100263482138047	0.0192147772243732	0.197983414229385	0.0598510809658628	0.0404816945916381	0.00633283151039573	0.202218576645152	0.329590534565875	0.17943901875289
2008185	12	0.755676041846961	0.00664643087491922	0.000440893598962562	0.0195219608881452	0.447630174388251	0.0065757321707564	0.330312569102545	0.612694999001167	0.176713911878824	0.223248564210787	0.0961611435281527	0.016821318404289	0.179462244251219	0.0532680246115145	0.0382963744361055	0.00590959124296825	0.214157533841096	0.417173059484172	0.305121322999215
2008185	13	0.819594845813528	0.0061223348814112	0.000980728941120954	0.016915924467728	0.538943311623297	0.00641050334140574	0.323936239201259	0.695306649096157	0.183825695747614	0.232479415578712	0.104433636326432	0.0162949883275467	0.169646019948602	0.0430979112593057	0.0361051652957981	0.00597260533965911	0.219838811232803	0.438230779212365	0.403951845181054
2008185	14	0.908729553681575	0.00582298735124064	0.00165161174253921	0.0163229849260598	0.615959624473182	0.00625945077106418	0.316895285184511	0.785436304863277	0.19350190719383	0.247945335211967	0.106445994066183	0.0171071799850382	0.167012817321604	0.0284527903307331	0.0342943041728668	0.00604565212523056	0.22363680568117	0.410665494182162	0.406809390963255
2008185	15	0.860193856579845	0.0054716733090914	0.000265183184162936	0.0169252977914105	0.66293525537364	0.00610193979131976	0.335130458875177	0.844379209769315	0.192953818013123	0.264781650303568	0.105285484048003	0.0185037201569259	0.169856471004857	0.0188379041194787	0.0328240215688169	0.00608702246392187	0.22051049651152	0.328958388605623	0.369138108298468
2008185	16	0.839336537872977	0.00488867104782899	4.05389419544473e-05	0.0189721847806839	0.736611174640578	0.00596623880523486	0.341893487220174	0.885394405615636	0.189680202350827	0.290914684156496	0.0859814129910168	0.0198856289556627	0.179855150352332	0.0130649876664781	0.0316380051677538	0.00610856675020972	0.217075214741913	0.287440478636598	0.3245807148293
2008185	17	0.875700914038779	0.00311382845733566	2.07756907361564e-05	0.0226000970613605	0.819128706822112	0.00580777009227715	0.337813866892177	0.919357054767219	0.1838216113415	0.303916864511338	0.0700484174996629	0.0213878033673582	0.175066701071924	0.0107198259779795	0.0308178544307776	0.0059802235465304	0.232292196328837	0.267204753253139	0.276357112307775
2008185	18	0.905090303779501	0.0021327599884743	7.75051266417733e-05	0.0254778448180352	0.883965863462414	0.0055844527342002	0.321108994838068	0.961270298933598	0.170622523843714	0.307669189837278	0.0639261902957152	0.0224537665596218	0.203181462948526	0.0103230963136144	0.0302706737173285	0.00581949353663753	0.267247037716968	0.243208123555742	0.223890535465497
2008185	19	0.943670809440897	0.0119596179652848	0.000870656928214991	0.0297567471665101	0.90015256176403	0.00535730275225357	0.319405635682028	1.01008992252935	0.15089053862317	0.310009912363	0.0649298301093765	0.0225656915734443	0.265516671476737	0.00974942355676894	0.0284944994290646	0.00559299237292801	0.286637309210912	0.166199517433203	0.160243832657316
2008185	20	0.904501915795331	0.0687631196458998	0.00121481998916404	0.0362749364619342	0.90079151855693	0.00495188169354764	0.31980626440483	1.00678002975591	0.137574830906293	0.309588075888195	0.0730525604340385	0.0218733624185777	0.350202391430215	0.00925666761346863	0.0270016426035314	0.00558382177342232	0.276863578575601	0.119470431144196	0.143008747273816
2008185	21	0.739618497796423	0.143389172994128	0.00281394870297849	0.0349199424930909	0.88226301982814	0.00346028222595041	0.309597374971408	0.994115926979169	0.122225519602096	0.310190111349896	0.0815267490244171	0.0209874946752314	0.39683050479809	0.00890932895013177	0.0256677620435476	0.00571956140978767	0.265863876888196	0.125466178732499	0.27692760006579
2008185	22	0.62097606679261	0.189017968676262	0.0226105088008575	0.0297280663358086	0.836055322782024	0.00259938493684714	0.317164730359318	0.958435619368006	0.107325605887091	0.31614895573994	0.0965686634295558	0.0203221659204092	0.354416925484715	0.00862451908364084	0.0244690365030073	0.00597734295963029	0.262872922851433	0.122960518020455	0.575370478446536
2008185	23	0.636364387888768	0.190242911648352	0.0356089015535774	0.0289712884182337	0.743254693220686	0.00281866849832174	0.329657835621498	0.907791744676854	0.113015724459203	0.325864527613442	0.104780859219675	0.0197708026314635	0.320019321174413	0.00836684609814627	0.0239185881304747	0.00644238623927658	0.250869478433675	0.128592531921152	0.582967879022627
2008186	0	0.773236206033496	0.178110912700977	0.0719324658883713	0.0369641442068853	0.674999001895897	0.00544739645022853	0.318876102629917	0.879117693622391	0.146857356769368	0.335564693957598	0.120119054856603	0.0193309169600915	0.320932714350772	0.00816649788812718	0.0233605003136974	0.00686599050089315	0.227181683004159	0.146711254170669	0.635963155720456
2008186	1	0.883574244941726	0.160677338465855	0.111728537364031	0.0404362375286753	0.621837330834259	0.0132321233072843	0.288012898023307	0.840312578660611	0.173080040660291	0.336043501911082	0.163731994094166	0.0190772447794045	0.295850552653315	0.00802202729884133	0.0230614798505806	0.00720953896451349	0.210058707226242	0.179787967871543	0.728961774121907
2008186	2	0.936443994703286	0.141013158464691	0.114234839071277	0.0401292094571064	0.605282375331659	0.0267236626058184	0.27432405745748	0.794772950725259	0.205170704138624	0.328202944000218	0.166004943568334	0.0214393575602017	0.270957129598059	0.00801035073424776	0.0228281475547334	0.00759245571151084	0.19584001978698	0.177614876482476	0.607080354795438
2008186	3	0.950730222378452	0.115907867494942	0.115168743969707	0.0398697793423248	0.586162740653703	0.0366122329416983	0.289745709178335	0.75421278091285	0.227412066977891	0.335155945300791	0.173769822639618	0.0231371050368095	0.296627705254232	0.0086460001109489	0.0225048605781234	0.00788315489638204	0.173958659458779	0.158427276223792	0.478990136684576
2008186	4	0.940849107480683	0.0883672666636592	0.113971748133354	0.0408926706264582	0.549222988967632	0.041231504489669	0.307786918371093	0.713532060186993	0.257418159367693	0.353421351827784	0.142776797364382	0.0234598755924681	0.314387864502439	0.0159317156103719	0.0224389856376867	0.00839075386994765	0.152323121897482	0.146633552505386	0.330060574684779
2008186	5	0.924918981992267	0.0696142200555011	0.109817574909582	0.0400991907136816	0.49829423642578	0.0411669494750083	0.317771240701403	0.659864438742155	0.265697650929082	0.351708929935341	0.0863621107824603	0.0240107544853781	0.304395603998997	0.0364519455460937	0.0228344675664474	0.00746676057455704	0.131023318428021	0.130712473463433	0.439434922718071
2008186	6	0.87347470538629	0.0531068980133369	0.107062255454723	0.0388347864498383	0.443516181229413	0.0211211134846336	0.33593348420796	0.634108385042249	0.227623318387288	0.3368060110666	0.0935122325508671	0.0247052797148846	0.315525104158507	0.0448136999284642	0.0216839484786403	0.00520891474573667	0.118605917982116	0.112981091987025	0.35004639160129
2008186	7	0.815436400782134	0.0379051852206316	0.0919499975951065	0.03656738529984	0.419819692265033	0.00726845221261123	0.310985486541925	0.613605480009942	0.214306446189114	0.304646838128758	0.099953914987073	0.0270886541335716	0.296140236059334	0.0535710483416347	0.0225826559801686	0.00523937581322422	0.115787611198316	0.104607295752006	0.426817303357552
2008186	8	0.751968622739817	0.0277743521236899	0.0766856319007325	0.0382260492350067	0.380081829273838	0.00376400713155242	0.287462883201605	0.565292061477405	0.218975581064751	0.263062655440875	0.0898208784788077	0.0297261992113968	0.24170034330524	0.0475479320877881	0.0262600363308112	0.00623134227667621	0.119121802414741	0.104964427504948	0.450779850212414
2008186	9	0.671723995871257	0.025146684200927	0.0669061327903161	0.0447285688358922	0.347142176840635	0.00253405659649614	0.283509205059885	0.523962185825725	0.183348572959453	0.237481220723888	0.10280472591978	0.0299596275135106	0.207329243529846	0.0403395168232892	0.0255722931786448	0.00658153353514671	0.122083577033936	0.128129970064877	0.395549426735906
2008186	10	0.59395948975903	0.0258945445981483	0.0574542346755466	0.0577310035772755	0.343684223194945	0.00151147924241794	0.275078760043638	0.492611587209588	0.136922052472747	0.238202748342812	0.094194635690577	0.0280542323298145	0.171556542462274	0.0316926842841152	0.0247256324664697	0.00172216176796281	0.126594358422321	0.129163376328803	0.359477060033914
2008186	11	0.5420884671394	0.0282003984307298	0.047923976046304	0.0714791376687718	0.386400680408711	0.0013709501950608	0.269380675506473	0.452126344714027	0.107204374279337	0.248014744443316	0.0951693867673838	0.0257843162824805	0.153082816198017	0.0231452585430404	0.0238300067681613	0.000103639455604325	0.139059833867924	0.132009962997974	0.347237927992558
2008186	12	0.469300812423232	0.0296191976353767	0.0389621487629892	0.0792780879907189	0.484889812019542	0.0011981539188429	0.26056075039286	0.409348564767287	0.101850531960748	0.245093008623603	0.115548604165571	0.0237680108600427	0.130342778049816	0.0180823284638728	0.0231335718997056	1.07469573316059e-05	0.187651320625506	0.147439880809785	0.35171465422743
2008186	13	0.38932877256825	0.0309182573793971	0.0310862476947033	0.0870684314750423	0.516498204881286	0.000994714719724227	0.219856842956003	0.386334988044437	0.096229771672991	0.237195565267352	0.159838233432485	0.0213598921692925	0.115505325534607	0.0136490858288736	0.0225838521007293	1.87660442695277e-05	0.239483897291311	0.19446593293849	0.339154417493299
2008186	14	0.331455328387497	0.0324875413981199	0.0282951573507089	0.100051639200304	0.503145133107158	0.00072860681716855	0.183147579606796	0.376887298574877	0.0955005667805623	0.2226966066121	0.189794961774432	0.0183750029594077	0.102983571048768	0.0108502064625407	0.0221047281507449	4.69513780693655e-05	0.224918028421152	0.251285751676362	0.329688648300272
2008186	15	0.31279591737539	0.0389835389799738	0.0374379859444887	0.123801302006539	0.478293018604494	0.000409815737542798	0.162489263364195	0.366529793862379	0.0913117885634903	0.203426158927744	0.215337962867302	0.0166890065661961	0.0952606641157681	0.00862523044603146	0.02146546513422	0.000101428002337426	0.181989168375512	0.35889930207152	0.290213262083631
2008186	16	0.308507423178612	0.0549351806020055	0.0372865493763147	0.147039641135649	0.433257044649639	0.000305246818227338	0.153511323908845	0.335377766026302	0.0891991427224925	0.188700334605754	0.255233215578113	0.0168998715338075	0.0931885631192397	0.00721134738626728	0.0207864716522911	0.000132532930467781	0.14928456908724	0.564733865510239	0.275427439373775
2008186	17	0.301973620805935	0.0677905318106591	0.0327472951077454	0.15247429696757	0.329419543006981	0.000185562855860698	0.150346361797392	0.295896695051569	0.0868340756380426	0.186991699033609	0.287731703179528	0.017717953568757	0.0867803182570558	0.00634594065453008	0.0201273596767512	0.00013962169328444	0.148716964520758	0.713051579332871	0.269996822576068
2008186	18	0.317507616366016	0.0737169776346011	0.0284705786238543	0.159293036551717	0.241122523704786	0.000112479353311983	0.151544085853232	0.271828769639724	0.0924368102348477	0.195964253968895	0.235172616795875	0.0201674790201381	0.109553548621433	0.00585851339271196	0.0191319383596408	0.00027949892460197	0.171789499202393	0.724507332342012	0.274270541005815
2008186	19	0.349936383737099	0.0935168867667169	0.0231210176541863	0.173926383489122	0.207418672525576	8.89533245619724e-05	0.161035379721176	0.268069841741421	0.0999553574331617	0.222989793900863	0.184201432288622	0.0256668537920138	0.0680014805268554	0.00566622874206175	0.018033385270262	0.000754941366452603	0.193218915121088	0.815112034928791	0.25800043290187
2008186	20	0.429573009849876	0.117063103965269	0.0197349086017868	0.181637021689792	0.18690020743863	0.000118445721627739	0.185379643673468	0.272621068715057	0.104353100987895	0.276938705347062	0.14818887949027	0.028670054169341	0.093345324794039	0.00581047687599164	0.0172291662183011	0.0015727090857252	0.210942190454007	1.49090419499494	0.164397550354961
2008186	21	0.536732812636184	0.126400805394574	0.0181433040131447	0.197728264008386	0.190785706952387	0.000173431547472045	0.233124829353335	0.270317330976848	0.11929553076539	0.383554568213611	0.139002900486603	0.027720114000691	0.0963871292962196	0.0059748901858165	0.0168967103364369	0.00222938570455477	0.219546085374419	2.19008680338903	0.159037627100813
2008186	22	0.560773214142282	0.131282631702218	0.0176090905196403	0.195742755739164	0.202536228737545	0.00018219690558472	0.378602615979084	0.262621448076424	0.176194822115064	0.491987867610254	0.132724007586305	0.0241074815762094	0.0824671961565154	0.00662700877479043	0.0173520114843522	0.00131741748972091	0.211156510613443	2.23820593750812	0.154175350817788
2008186	23	0.49449769464893	0.124793080910864	0.0173944757835808	0.190870552948417	0.205332547206324	0.00023088460835856	0.597237537870141	0.289911466459689	0.226367017370605	0.920164023467512	0.140940852934717	0.0209758469622529	0.0838051000204829	0.00738591376601085	0.0186520743974701	0.00127911216281372	0.19474127692813	1.73515938732821	0.141381168473832
2008187	0	0.492949183392283	0.121078005738759	0.0172972894096822	0.165091484996616	0.201183186247231	0.000453820175987373	0.79653684286773	0.416341602660525	0.323346508437621	1.83020179851122	0.122315777947064	0.0226327104132496	0.131328910564563	0.00777873206635892	0.0194862195413028	0.00124082157578136	0.20648630053268	1.03278646135266	0.123913509024958
2008187	1	0.529690651146832	0.0941800428597311	0.0172461243144571	0.167244917195413	0.212580262723137	0.00211173678351196	0.99909550157151	0.706108910666404	0.442005327290081	3.29361998464764	0.13462676523971	0.0237412555632091	0.340365030227877	0.00790644895888777	0.0196298884875246	0.0015095664422557	0.238383627799481	0.465498908845932	0.104567611143563
2008187	2	0.556878255842928	0.0940005439130039	0.0171729475990442	0.182850064996522	0.214643667337338	0.0062705978538468	1.24803318219786	0.752124529391911	0.525941935453276	4.52678402006875	0.149975636830016	0.0245123062516841	0.773462113522134	0.00772418956929826	0.0196620040855542	0.00165531085834421	0.303455662672637	0.231642612086453	0.10129140662889
2008187	3	0.718550431712631	0.0993031706573917	0.0170654900487226	0.202663348028859	0.235006463127035	0.0161690994100518	1.66429132638495	0.743633980822523	0.422129316396116	5.25872875629866	0.153076876000091	0.024303684587355	0.97037499805477	0.00753537855351808	0.0172807237324159	0.00100018379939528	0.340965602821299	0.180227623699399	0.0803611143354288
2008187	4	0.887569412488423	0.101423206675431	0.016961543106344	0.230761709438211	0.262144791792392	0.0280805933201766	2.30497248558004	0.605679432945655	0.247440462342432	6.45796220824807	0.15843907407569	0.0215526107184777	0.770949984438453	0.00726788577312447	0.0109681861878696	0.000512864022315438	0.296037619244114	0.164396430360647	0.0680789646346546
2008187	5	0.859329426830031	0.109291929576151	0.016791411645878	0.24260660899839	0.305234974585974	0.0567850699878666	3.0616914812033	0.475142032823557	0.19728934918781	7.21357647653838	0.155211943792067	0.0213574245818231	0.465806983070554	0.00808595965574374	0.00929546955745097	0.00144945437298737	0.236798125126648	0.17842949895335	0.0694006025746742
2008187	6	0.740569533614781	0.107008732356877	0.0166752316396365	0.225353513946342	0.344265625985906	0.12761476563823	3.49425231403168	0.455441857828377	0.203115473717326	6.04228043042517	0.145558027277232	0.0192888220335228	0.382595391303782	0.0113990309847283	0.00935335784861668	0.00433529776190931	0.203286264760382	0.188033850111372	0.0744480662633259
2008187	7	0.849517035037071	0.122850108978694	0.0211702174661032	0.230723851447609	0.299153458861884	0.117342797223499	3.29209212716347	0.53780382329856	0.211107941016165	4.90773096808131	0.125566003332096	0.0152303451203159	0.382739722762411	0.0139475198123984	0.0105338693009764	0.0140465657681978	0.212865962716991	0.193475320291421	0.0688311559609707
2008187	8	0.981749959754061	0.157743114391343	0.02402191807616	0.229485464559236	0.240249813999016	0.103846016710508	3.14268198886927	0.607325363143149	0.219352876818448	3.42398630462504	0.110043468645075	0.0109983869793284	0.407662555251395	0.0155377455109471	0.0117515455582696	0.029284149172603	0.243690541355259	0.207006587346065	0.0701659852122558
2008187	9	0.989997166720431	0.154463135674248	0.0327176084795939	0.216436268263823	0.20444567382582	0.097877241137732	2.5309921797705	0.684229324619931	0.221816843131988	1.91778508140693	0.0944206260230082	0.0088968845859446	0.429084040059393	0.018090545079924	0.0136692975842595	0.037188933427557	0.260839930355062	0.201119501961959	0.0732462243089127
2008187	10	1.15186403919016	0.147854345983018	0.0319783671492048	0.197867348253932	0.169028223200084	0.0917366245660536	1.75226339476796	0.732400449235165	0.228256643667768	0.850576668786338	0.0894454081254385	0.00807079687930664	0.445131514673583	0.0189250865220154	0.0143048608248558	0.0383600675766282	0.246115851748187	0.198478949502157	0.0945970805122225
2008187	11	1.17118322114811	0.13667945494223	0.0286272323565865	0.172971755213471	0.150273796111763	0.0806813933084532	1.26026857985358	0.783642944256962	0.226663094908817	0.609064568694887	0.0843534356981591	0.00708571127470114	0.436482058768466	0.0186967499040699	0.012966164477988	0.0375331089306589	0.214287704148058	0.205639285226902	0.0870515043590095
2008187	12	0.969604439096611	0.125488354005966	0.02528804515008	0.149182040473241	0.132790010242376	0.0659559959585916	0.872305358149637	0.95576076137843	0.2348858171554	0.521281772527756	0.0830162336565473	0.00559270886740187	0.387375138430572	0.0183768184620324	0.010146511103219	0.0305449476296235	0.17955941434418	0.214854330451001	0.0844646042675551
2008187	13	0.689190434478868	0.117839320794663	0.0237656168828228	0.125062141814346	0.115228799859506	0.0542280677556406	0.542563144021157	1.32970094752325	0.261060841098829	0.53087333569338	0.0888088884076164	0.00418481904884371	0.28577217774813	0.0180244545100109	0.00834490274221794	0.0263057236971571	0.164309258156985	0.216576482651061	0.0760037173600223
2008187	14	0.442029968532758	0.115127689561651	0.0263970753366775	0.105030404070605	0.113619214905623	0.0454660355230399	0.305564434903781	1.8927654786162	0.298469584912345	0.562623288725096	0.0939594163418322	0.00291975193172093	0.223355407517587	0.0171250907401491	0.00675758534328051	0.0223985713290409	0.171382433751473	0.21255002110555	0.0568665014596232
2008187	15	0.382779986374661	0.12090213332996	0.0277741676044496	0.0938881795007198	0.115168800714165	0.040626232629863	0.195588986761777	2.20687669708337	0.336995369318124	0.587611447597981	0.0963047766572517	0.00179709745385206	0.182784416047892	0.0158165745537947	0.00532946893645307	0.0187081070092517	0.208178402295266	0.198048954227755	0.0330323404369713
2008187	16	0.454078798418011	0.12331591106734	0.0258132064726894	0.0832012995524162	0.128874045954238	0.0419787513421537	0.16480521275524	2.44008669023184	0.338086975959053	0.604152622115771	0.0943082363332963	0.00135908945193994	0.135534579852775	0.0140425273746952	0.00298684889413695	0.0159848471855957	0.276980568580537	0.174003086752235	0.0262863763176412
2008187	17	0.448262999112739	0.120090493504175	0.0223500937729866	0.0755536723998644	0.154976713079783	0.0406832157622046	0.146446340568579	2.67535664624123	0.278788266584901	0.660279557338622	0.0896936532997563	0.00130747784849966	0.106785637966795	0.0124830747135825	0.00225284388047536	0.0159481802166385	0.362624516993628	0.170609088170852	0.0227078423267518
2008187	18	0.358627443284655	0.108924286249488	0.0137254686247967	0.0692004804669893	0.188207586463679	0.0366640330422612	0.172295043958639	2.29338541938034	0.233120861800488	0.775167013828421	0.085654588495732	0.00163918504593035	0.109251123999431	0.0112825432740999	0.00242314686100809	0.0176022029640185	0.464133067550809	0.172642770500667	0.0216782846720209
2008187	19	0.326952312962068	0.0966423940714022	0.0122306369203707	0.0464825131020254	0.228805782526088	0.0292066084413941	0.188499883202615	2.00390436948357	0.212834824087972	1.16659108883786	0.0825300701986168	0.00230526538187425	0.136262218094057	0.0127318477062367	0.00285068583161364	0.0248170150994356	0.552051126720172	0.192003039095503	0.0209291326501659
2008187	20	0.365996623478088	0.0847288615610736	0.0125489747869075	0.0393808205977296	0.329234891006918	0.023209368032969	0.252901270690307	1.74889532067818	0.201459781435958	1.31622661957273	0.0820113772053922	0.00244448417914836	0.163787303166744	0.0181258071789943	0.00363272313451758	0.0348386902414467	0.557774332837695	0.251270887192735	0.0236250163004494
2008187	21	0.488091547018648	0.0740270419226967	0.013349843589424	0.0345973661735767	0.493365461253158	0.0191982583703221	0.384961555527113	1.56943195967089	0.196692161680611	1.44684753548661	0.0832060068461834	0.0021365934306844	0.21050751573216	0.0230424437792284	0.00457723434182519	0.0463976763412844	0.49006758932608	0.33456279459851	0.0259131323978746
2008187	22	0.543646970533286	0.0657774819027099	0.0134912213106782	0.0311775757541556	0.671730083334798	0.0165092434218524	0.489640800243123	1.40743603180538	0.200337679790483	1.44683508432895	0.0877478864375421	0.00186152398130042	0.241344268450116	0.0268870507654171	0.00710298030632955	0.0532122180418297	0.430933992292638	0.446770274708536	0.0273799117589437
2008187	23	0.540980606612884	0.0591869472892469	0.0132064856394134	0.0281084544874621	0.850797659967809	0.0146886603400634	0.544331369594684	1.35060390866454	0.219150467101983	1.7157265895901	0.0947070349940419	0.00174028569925378	0.266963610567552	0.0381760570350667	0.0142819146113722	0.0550601373504614	0.404061385417976	0.538671290920483	0.0304426681228382
2008188	0	0.778322408587781	0.0535418776317651	0.0129270506607734	0.0278355474434188	0.926773965459612	0.0138790374168444	0.6009949702835	1.39872094648802	0.253801606673377	2.72101678388605	0.103818990967699	0.00201742483893018	0.297395502071557	0.0462700387313587	0.0226723155500045	0.0659816370466468	0.380920015566989	0.59269003118481	0.0520526058213233
2008188	1	1.18497784070329	0.0474146823497433	0.012749283916008	0.0304737748694233	0.966636661027724	0.0142190867596349	0.633348889346142	1.49983549466171	0.28739227622744	3.47996704339428	0.11379887721293	0.00237072397083509	0.352591184363871	0.0786137654309236	0.0271130814011412	0.0524241706550835	0.357292622671248	0.615392181534647	0.0683170224868791
2008188	2	1.54377290784736	0.0421131405436396	0.0126755621697714	0.0412435111308612	0.972863671535851	0.0132259489207142	0.654998147417236	1.61778245992492	0.293198348283397	2.69516469477783	0.119674949438555	0.002276693383226	0.394371285837407	0.0884171833423182	0.0377795414667558	0.041293990583345	0.333144511034186	0.671508715650014	0.119774791840889
2008188	3	2.09905021039855	0.0366812450517309	0.0122616496710303	0.0623445858730014	1.00395462649843	0.0121422064224922	0.819989035618529	1.42927931638423	0.261731191321003	1.80211016836211	0.12114147664503	0.00205292521315925	0.378688175526027	0.0456593315990967	0.0600564185087338	0.0344288925865183	0.316719824681623	0.765202080906702	0.286100000876214
2008188	4	2.17338964840894	0.0301192586567333	0.0442491257408465	0.0735575157991768	1.03935195055013	0.0114655365756488	0.789514309647302	1.31206934707711	0.252435721650241	0.650778991778541	0.115110105296193	0.00160166689694483	0.375146979413125	0.00824765427121884	0.0953187583394735	0.0293081191965774	0.306868489241951	0.840884723183974	0.282771535937814
2008188	5	1.40210974508292	0.0378386287786231	0.069617436974321	0.0768197032537441	1.00923714797027	0.0125950317564271	0.627691291788393	1.17903452710112	0.286783176408801	0.503008866036946	0.0984821077964042	0.000630129251332929	0.403279560091071	0.000757367262240227	0.151371203284464	0.0437266986098471	0.30985508309437	0.801851349789304	0.32629814594143
2008188	6	0.534366256974942	0.0509286599571471	0.0630936743923192	0.0778651784024326	0.904066534294064	0.0146781959256615	0.400309267660156	1.15113744307583	0.387633514003211	0.42235853873536	0.0883489120621693	0.000137446540405053	0.432419097401696	9.46323074665295e-05	0.184840108187123	0.055632006339788	0.32967712024637	0.800021372418347	0.548756406738912
2008188	7	0.302757250812146	0.0464107630274025	0.0573327270624033	0.0872417279745896	0.706229264089304	0.0204105943857818	0.344935307571117	1.09433792345304	0.585228007852131	0.374779435043271	0.0831418005417009	0.000187365541377273	0.316171302322958	3.18128897829325e-05	0.160677258881943	0.0539630184162957	0.355926552599712	0.74477839262339	0.564581744948585
2008188	8	0.297828126989684	0.0383327874932139	0.0624204053075226	0.109798597876673	0.561729370884966	0.0283587739009848	0.305914696384594	1.07138680861938	0.608977836994819	0.355299342065488	0.0795438864441724	0.00112590351992979	0.20918028780939	2.89418955243729e-05	0.124796803677325	0.0494427595589873	0.36621155293782	0.732192103248331	0.571815356044975
2008188	9	0.535898423007533	0.0354145226342572	0.077158966039385	0.11366012469791	0.49099401214854	0.0284955922777317	0.277413489895017	0.9952063746962	0.516758348993319	0.360483150590987	0.0840016974255693	0.00400248319088916	0.173651349712236	4.07224450290361e-05	0.0921977180370926	0.0395140118998869	0.339331595612741	0.76617583960081	0.563156728018881
2008188	10	1.07843841205502	0.0230481488435582	0.0762335816966492	0.0978537860898932	0.42905362408129	0.0253268365141625	0.251907541808892	0.882480943412392	0.443465240463028	0.368935805145073	0.10008741698183	0.00572373317934363	0.147155911716709	0.000120827391575743	0.0673876592744315	0.0324917046316413	0.270729475336965	0.771739864470577	0.674405732643794
2008188	11	1.81962360758664	0.018363225164496	0.0649350416535623	0.0768990900451248	0.362905140529669	0.0232084768999219	0.230221681309829	0.703921142863265	0.404799060923057	0.3091711178216	0.11508999477842	0.00605723401175249	0.134029620584849	0.000370485217854355	0.0580004275067541	0.0275023622517372	0.200802287410508	0.76017975704955	0.655922995938129
2008188	12	2.21448157317698	0.02759638955846	0.0543784655799557	0.0504906869250554	0.307175329551917	0.0236965933780687	0.216430300834968	0.519425512580285	0.371936066107381	0.262352153594659	0.126658241976562	0.00650218675335635	0.118837650968263	0.000756313383240398	0.0513031874360486	0.0277279309196298	0.162120626441681	0.686301488475547	0.527287399035551
2008188	13	2.19694101107929	0.0817082218954927	0.0517168597649924	0.0378253861858192	0.233636431936204	0.0237405087125683	0.162754286812862	0.434895008249068	0.368315447662957	0.331330612523028	0.132737754587099	0.00661072962664118	0.0942325309237709	0.0014871218114973	0.0476151095134385	0.027709378994679	0.15009119445894	0.624598245957211	0.436824601802757
2008188	14	2.11579840970448	0.0968639384545701	0.04909100272138	0.0298821133152872	0.144969100637525	0.0217555882326864	0.128716564294361	0.446463267463686	0.371636379836189	0.665357782553852	0.132982962245746	0.00620859527240356	0.0531104977276505	0.00223475267831451	0.046270387040402	0.0334052685168502	0.140603319138068	0.617795390259467	0.409598261227451
2008188	15	1.80523376534743	0.0955193150221104	0.0439282581395953	0.0233063613401571	0.107416030399126	0.0205515728509861	0.126651136032691	0.479684432763929	0.404627446159646	1.35132538588965	0.133631514752144	0.00573061464948905	0.024092105652971	0.00262683032210157	0.0444489006826713	0.0364228873737611	0.128697146365848	0.555369944001294	0.392752587045613
2008188	16	1.2221009396383	0.103564186249931	0.0338503152329986	0.0199888488116168	0.0919479692828357	0.018781710032667	0.265072881602963	0.559217680269939	0.487871079041891	1.73228953531227	0.135424074667082	0.00456608701308771	0.0234514950600702	0.00281014650961097	0.041274932867155	0.0335661735727447	0.113324137563252	0.550808870258777	0.345143911605928
2008188	17	0.805330843222248	0.124216088239771	0.0222449552643989	0.0177613218039905	0.102962506105826	0.0176445253324733	0.556222679425733	0.637403135172535	0.519605590645578	1.71765128583378	0.136628597505613	0.0031187426494457	0.0206939845453128	0.00294475599757616	0.0399621914668137	0.0278898714473714	0.0949612443935189	0.535363076649445	0.337357605266681
2008188	18	0.706238409353547	0.120131082603295	0.0112234647528906	0.0226320968100815	0.144881568388026	0.0208379852554094	0.784464943501655	0.686092643523023	0.474914501288787	1.60541935782291	0.137050862769283	0.00208831315702411	0.0247288008271812	0.00328046071568295	0.0356769783262362	0.0179693151481502	0.0772030656970082	0.543647754094722	0.332952745493594
2008188	19	0.683207739170766	0.104383675504351	0.0066910858522928	0.0427824889872908	0.17746544538928	0.0339402327769663	0.840541475982698	0.669965318539969	0.425033992885179	1.50174334637859	0.137654667323705	0.00220025303848596	0.0183616698708127	0.00371537724140818	0.0235212599519	0.0160049637627223	0.0619965627879426	0.591660590182217	0.284274716632157
2008188	20	0.625872669693409	0.0960481231434216	0.00900251803305223	0.0686945905615595	0.205709190190653	0.0529981406902762	0.783668903784258	0.598819723688255	0.401325305186733	1.30211278735234	0.139221171114691	0.00242388184236119	0.0168469777594098	0.00412562601873057	0.0231486727401978	0.0142095343207023	0.059011487437518	0.610906583476613	0.248732819250603
2008188	21	0.581647985288359	0.0920653817068446	0.0418352088836803	0.082097079432639	0.220696534529842	0.070632910766648	0.716578473618925	0.517651942095299	0.357198500227052	1.09165391638212	0.142625406160272	0.00256271611069864	0.0128017566443455	0.00519116112858482	0.0246732928861314	0.0120056249779632	0.0584851895112893	0.511109114571468	0.258803019523595
2008188	22	0.597318840306778	0.0878931587075941	0.0609119834626526	0.0855251829761503	0.236707497221151	0.0700111315082195	0.678711627275236	0.441628643330231	0.372994763623058	0.788280673934081	0.148209158029216	0.00291947037670419	0.00767610833268612	0.00639605732388596	0.0286014944600231	0.0104816487157678	0.0592015657106348	0.440417425318296	0.291136663251673
2008188	23	0.667767960645561	0.0809725443160436	0.0801035060672322	0.0859361422995462	0.267811694469031	0.0643027022859601	0.673387106876727	0.399067719774099	0.53385880023395	0.79517233503569	0.155360201328969	0.00327502138357141	0.0036234159667628	0.00389889527230822	0.0284149677824142	0.010353635703188	0.05712204583783	0.552086271903919	0.351776141609391
2008189	0	0.700184542448502	0.0743924606302482	0.0951057976593352	0.0854827479752981	0.304837221408263	0.0596203151971111	0.568883434631655	0.349173125307641	0.777216602907099	0.813743003541825	0.163768044446706	0.00292908453527916	0.00165477703066069	0.00180140241761114	0.0297864327190451	0.00955378837037708	0.0657987941056172	0.928481863761812	0.400135353327233
2008189	1	0.655373633095483	0.0712422519744881	0.0999718779858503	0.0857451477942369	0.322699070545936	0.0559079214427268	0.497113233129817	0.317981612957337	0.882102435770389	0.72277738152449	0.16983822292115	0.00284382973136936	0.000843869987417535	0.000680798013011514	0.0298503710509397	0.00986313910569887	0.0773785981716426	1.35254763793244	0.38509148379354
2008189	2	0.636144231760434	0.0692535816150434	0.098279602090061	0.0853582776628108	0.323978599384595	0.0519444511487781	0.452797702119666	0.325466950844174	0.889982353472292	0.719659085600815	0.174322679626777	0.00328920648820887	0.00139083887338843	0.000352203271912252	0.0266866678884753	0.00947136939812268	0.082506217924538	1.49060658384899	0.342015504541799
2008189	3	0.679600045988677	0.0666288543208502	0.0938475709446505	0.0829431544630167	0.343248730364212	0.0481406171756725	0.423287818258477	0.365135415633378	0.861373939744317	0.740888758495368	0.179797759858934	0.0040397183508257	0.00386005780946139	0.000303994456094805	0.0225586671254217	0.00953146145636542	0.0778767158631551	1.51544288408028	0.386419736921124
2008189	4	0.820091507244272	0.0632248114718071	0.0893708107440489	0.0813768204963509	0.377474036649191	0.0446694970553132	0.414285559875192	0.348532443011579	0.825316492274785	0.616235575760992	0.179848305082515	0.00549683077458277	0.00835539207678495	0.000308778549646584	0.0159372781342265	0.00613699443304167	0.0733377626016197	1.51869631506106	0.471453349154131
2008189	5	0.912412425197703	0.0590181340853761	0.0877433823386153	0.0822903266349904	0.371807809328631	0.0548282756920362	0.369906467848972	0.346788045683881	0.794028577664366	0.449168676980612	0.160942572519057	0.00834262950729038	0.0294136576784513	0.000610948042971818	0.0130908811752381	0.00218084001740613	0.0954214389914084	1.44934893278421	0.602843458217113
2008189	6	0.765647902262448	0.0577255584251697	0.0885174178010244	0.0812442561334566	0.325435598783689	0.0734190806640855	0.527658612734524	0.346584257046803	0.774766254544125	0.52882527518374	0.139516406979961	0.016949615625721	0.1500482051431	0.00142622259111126	0.0131951834266555	0.000880081379684098	0.124913291318101	1.3595991373635	0.695128739437947
2008189	7	0.799257524916612	0.0604609663133994	0.0637968844155853	0.093840235824495	0.244720885518322	0.0808883670428851	0.418709161042657	0.374076039078652	0.706668368139215	0.404634430080779	0.119280182983014	0.030308219930171	0.280549393491067	0.00190705529132911	0.0163721204435121	0.00033669557981187	0.152005432441664	1.3048118691412	0.705876050534178
2008189	8	1.09009241533289	0.106985070854313	0.0222037816559483	0.107396692213443	0.189702085083528	0.0816238226701884	0.309148465208676	0.368296842205425	0.628008186153095	0.407360935284372	0.10948899729724	0.0297110613178784	0.283544955811712	0.0018810598511423	0.0139875243712232	0.000313821259726038	0.172378921131651	1.18219787165498	0.72555525832002
2008189	9	1.33313718041391	0.111138756961933	0.0437707601790679	0.097182389247836	0.173176146701309	0.0974320602298242	0.260201325764433	0.31401068161998	0.576614480862915	0.602700600716858	0.108379899782641	0.0289639231486741	0.330288135840139	0.00215747904958311	0.0128694328615995	0.000307890698722909	0.180224744586472	0.975233161592806	0.659738444291118
2008189	10	1.35349632254724	0.0891586370828147	0.064631712628107	0.0954159290996272	0.165555154447773	0.110548610674874	0.288874894806627	0.306064550176657	0.547147611327203	0.616634796758753	0.110986552891399	0.0258628514519394	0.392770079637735	0.00316163198100719	0.0168825530464999	0.000162868776320483	0.182068477927515	0.809906226227763	0.549830907384989
2008189	11	1.20316620207586	0.094988448280796	0.07133264289936	0.108011698235583	0.155971001267252	0.0914480376575027	0.273122941519485	0.280132974694888	0.526958072492184	0.60464646001149	0.116381900005807	0.020630340511296	0.412826492181169	0.00353688675479498	0.0266722234866314	0.000187634533432082	0.18087718676105	0.733865597613879	0.442671398763552
2008189	12	1.1857983603653	0.110662042379894	0.0633936374371293	0.120309540726239	0.147065364214075	0.06872024780578	0.227434523592168	0.267203035963184	0.519977896339316	0.639364384820396	0.113457870914795	0.0168115177684882	0.425841767599326	0.00361613564979355	0.0336337209949051	0.000523019052033975	0.175750424923705	0.71074544502248	0.410104537421018
2008189	13	1.17645317229932	0.12597527338583	0.0525585451458987	0.109312805485455	0.139631107995029	0.0648837651584396	0.196386251320651	0.265394167399041	0.528587440126556	0.734191895614597	0.109731408058664	0.0146527123421239	0.427683276749691	0.00361668679337554	0.0358121549661656	0.00178956702057991	0.17324925489398	0.703667179779426	0.29830338268857
2008189	14	1.13420937464863	0.127185256419152	0.0475685152601756	0.0860264367559243	0.133750193002265	0.0648970590086112	0.187188312317493	0.272166260298309	0.543618585027675	0.759242456085136	0.10949279624995	0.0157906383903562	0.376275356045204	0.00375024883422214	0.0335563034956566	0.00358983582200022	0.168534426149615	0.688286426845599	0.236164987910493
2008189	15	1.05021205333115	0.128308172172404	0.0518642210536982	0.0728894587098158	0.129456973999668	0.058582965350477	0.223109281621334	0.299713470741521	0.533509433102673	0.670116860265632	0.11658704981925	0.0185512082163861	0.296231280053596	0.00362897879993695	0.0302430982168621	0.00838642648856472	0.16073137681889	0.683569358200891	0.538850519790123
2008189	16	0.955478074226206	0.116763240711593	0.0787642180544554	0.0722949571262791	0.12019514316848	0.0659251959460344	0.287247578683377	0.34845314858943	0.508800200611719	0.51621477903993	0.131744122521545	0.0226612249279345	0.235932192081425	0.00358356779490709	0.0239917235313458	0.013460123785159	0.163275778994615	0.687337183674085	1.26191089909748
2008189	17	0.896597742644177	0.12734866916623	0.0658093596891771	0.0709754155046427	0.112458939142782	0.063559129778775	0.324607403636971	0.392357073629704	0.487525932148713	0.405210880778208	0.139554149409327	0.0280772895514726	0.182225214606874	0.00365645330508688	0.0152892503530886	0.0189328215764868	0.173889637722274	0.704983978529416	1.3836518695128
2008189	18	0.839478552302294	0.134133147028199	0.0458352212106131	0.0646493748652186	0.119189918024577	0.0585695940110833	0.275021086637003	0.447437592550422	0.468503860454976	0.333797752963847	0.148396250357142	0.0320220733321378	0.162470736541934	0.00358488668269747	0.0126261857744549	0.0240874613503181	0.163486289607686	0.806369608348812	1.3535579157388
2008189	19	0.873537814730465	0.145469909755134	0.0476776052690876	0.0569093244878747	0.154131623174789	0.0556941966372617	0.218664879811892	0.464916757923164	0.473082465149541	0.318035994336576	0.176378321856056	0.0378256352829269	0.179998889509574	0.00349395150368384	0.0105701335755798	0.0300167100876412	0.139588893124561	0.832962943471811	1.20006624423646
2008189	20	1.07742887539912	0.144162035281101	0.0679140539444296	0.0526718118248744	0.203902366165862	0.0514441208973749	0.208639179787868	0.353821282297106	0.4813002614885	0.330268873914089	0.190608155308325	0.039991104678492	0.191031390205244	0.00336595057213035	0.00966645448562951	0.0327891778425097	0.150837596387361	0.771774428807849	1.00626768036027
2008189	21	1.0654264371076	0.115592479449641	0.0884501563874652	0.0577075385548948	0.217862160339829	0.0472777127653249	0.253400705538449	0.289767363851915	0.431468217583294	0.34089186275508	0.171567717717624	0.0340614946025795	0.158904367734864	0.0032095279823934	0.00903346245470797	0.0276351321853906	0.17875444981263	0.691535710827048	0.969063484801519
2008189	22	1.06627766027413	0.0919957849760844	0.113198813943356	0.0626026615091258	0.201632843114925	0.0674620277598	0.3381967492245	0.288532034990992	0.342258273985646	0.296412538531215	0.16563561349628	0.0253505785850002	0.134601911768307	0.00294189170428756	0.00840283465964756	0.0252148830038145	0.197819964860445	0.671242434937019	1.02689398305845
2008189	23	1.68895342513828	0.0789136058157358	0.16524961944793	0.066939090269764	0.20574694804365	0.0886499095846173	0.361111009414957	0.284923247448506	0.305700712817816	0.274365687137382	0.165936800617678	0.0172644933698133	0.127744454495407	0.00276246914104809	0.00782954096052265	0.0477124636982048	0.19046278008139	0.637654286193129	1.10956525553354
2008190	0	1.80375129033659	0.134523312847466	0.276130881575081	0.0615130734996327	0.212404048927796	0.0929494083268863	0.313888375904769	0.293784596269437	0.314850082705695	0.302541131500258	0.165537552894892	0.0127661957802329	0.131721529250781	0.00266000051308434	0.00756471201191347	0.116254163051597	0.163561121336576	0.587466885743409	1.14650797703705
2008190	1	1.25409044897337	0.234815266474199	0.311116370668626	0.0575073039851256	0.214750049622125	0.172535292774716	0.251367201869247	0.281243393248274	0.309728263660592	0.3032194994335	0.165491389890995	0.0117662172091664	0.153731999128365	0.00253870292176861	0.00588627401293037	0.140952851751348	0.157807388039935	0.512203039476305	1.18766676300493
2008190	2	0.907977816627071	0.274586453888623	0.390765235278401	0.057541617256249	0.212708365272522	0.184111036322709	0.233960600073996	0.4107963928842	0.271246600389118	0.326983599124566	0.168049743865854	0.0108835335261322	0.161073649139197	0.00242508362001842	0.000811777175356588	0.142778376274874	0.160952042713317	0.498670158616265	1.11638210664705
2008190	3	1.12519868970672	0.252700286774584	0.457157526316178	0.0819734684741557	0.2170254237293	0.196242344334947	0.234277129628956	0.640387960171853	0.278178826356541	0.507999751329765	0.175290032597587	0.0105999703282561	0.167742496306287	0.00238585215338401	0.00161242224769456	0.123581177732187	0.159876268410048	0.478475237087784	0.892100781337151
2008190	4	1.58846062904362	0.225164184920748	0.459941906708117	0.164611276912243	0.256918398134963	0.175534696452053	0.288416177459322	0.593370261520643	0.331264101177656	0.689083443977964	0.151442794884312	0.0110799834114077	0.17376391825112	0.00263949664663572	0.0106615485718776	0.0995144139939407	0.143863433938844	0.433809383506073	0.572445952581876
2008190	5	2.14311977728315	0.292220585748431	0.385229429609038	0.227330218350429	0.391828940172652	0.135094828633993	0.475289996798843	0.596637322285687	0.401968798475866	0.575081726125474	0.125767385891446	0.0103810278542111	0.178819022009002	0.00389711138491504	0.0234501159049705	0.132201319123828	0.115337592440017	0.414549490711931	0.709391528255134
2008190	6	3.19398180667078	0.390576510948671	0.387960198920143	0.198368525540184	0.467951113384789	0.11907918074276	0.497746689954959	0.612077002509954	0.511595946823674	0.367564228822989	0.119557353424405	0.00933084872063498	0.187107121193291	0.00775308914972074	0.0367762257220257	0.15505868949493	0.106183720764024	0.313322331397243	1.03856248317597
2008190	7	3.65746328413161	0.339859542580755	0.411056413523397	0.161843057926701	0.479738572666298	0.101449334657531	0.39546749227922	0.484001152977054	0.647023914308685	0.308429710730503	0.115506199456781	0.0101053252562424	0.187258702952068	0.0112691812107698	0.048204419914416	0.149078188316988	0.135478267599465	0.286924760894729	1.35697222042005
2008190	8	4.11592627776141	0.292266959286679	0.471192704092499	0.260317858890857	0.503528911852864	0.079978474124409	0.250387918418118	0.527891575912012	0.716597856411116	0.355347319048066	0.131139177895132	0.00987664304998396	0.17959935877268	0.01207026509279	0.042975573375673	0.119928304926499	0.205355588245484	0.287009693237307	1.36625428189942
2008190	9	4.08966394073834	0.283610934098	0.524612985750614	0.326799535733303	0.505496017609365	0.119338011638454	0.175523228074591	1.92152130320279	0.791048170054509	0.711323062904938	0.160078970193219	0.00925588351566889	0.150605723546593	0.00991917096276326	0.035991070735247	0.0895334470918838	0.237565309914797	0.390345923040142	1.39445647165154
2008190	10	3.53047781091932	0.265476851425951	0.499005774234373	0.298311373615735	0.374896449261111	0.21951795646802	0.22046114270483	2.85735527335715	0.838072252174972	1.82227251609626	0.179060745964815	0.00786057151507659	0.11544950855789	0.00833223413747919	0.0403095347552935	0.0656343240494229	0.200049523177281	0.563482496882974	1.34130007230848
2008190	11	2.51231475310123	0.205028896846272	0.381660400077939	0.246941557028378	0.428957429432064	0.230910540833125	1.12109710466246	2.6824002359922	0.824474941858561	2.64862408565288	0.177209839161001	0.0097018051389459	0.109858930812699	0.00746047737801928	0.0521030350021549	0.0548089821039469	0.16697159701813	0.724021658235297	1.03018920017574
2008190	12	1.53380852987324	0.228124600449811	0.270237747102392	0.244073750173024	1.48999281763271	0.214993128342908	2.04486620134868	1.92472465044434	0.74495616269494	2.91656526848152	0.164068694222774	0.0130363505894397	0.131144430218259	0.00724761988215106	0.0646437756930909	0.0564637380540612	0.186297170861655	0.802940171104776	0.825447625798925
2008190	13	1.25243495296189	0.304354507672113	0.265546853739078	0.247571757970487	1.43969939294744	0.186484503976557	2.0572935440539	1.38473089655013	0.564259906177386	2.79282004905841	0.169128809045773	0.0159742164808587	0.149692936001661	0.00722538212604628	0.10905495841564	0.0631764040729159	0.313579558998982	0.853020617764335	0.824867603097212
2008190	14	1.19981821415039	0.304763217476258	0.252287237927003	0.209347950568161	0.90685274713933	0.181807580224435	1.84011101141555	0.949610115993023	0.461455614622005	2.53400758115972	0.198570957868132	0.0197899536189635	0.149644867504231	0.006894253080962	0.097286845907723	0.0825201790555363	0.405689395154846	0.877929366016112	0.993178377781933
2008190	15	1.19614921525278	0.312706139313687	0.244840193951396	0.175017798100293	0.579070172828869	0.15887703256785	1.5939680991218	0.700682158804816	0.681369306861029	2.33461809037888	0.224254264451728	0.0230824452939372	0.0938323614141028	0.00639205441602857	0.0706136037349566	0.101613903309352	0.345066077751356	0.865839083821276	1.30498483591811
2008190	16	1.84534682212751	0.318884635967973	0.389315344496193	0.165332258431175	0.40891070615551	0.0929898779458	1.38632069201566	1.0003383050081	1.57714565399694	2.25572024536931	0.235866875381516	0.03120326721719	0.0399776283527651	0.00591407920343413	0.0626933388894532	0.115073852812351	0.335636385788915	0.821953336962462	1.27953147122823
2008190	17	2.70716184639396	0.324330926299273	0.4764141024704	0.16529055108659	0.347547394593096	0.0294439021619475	1.21389119017604	1.38071998154816	1.786385861044	2.21545274844636	0.225759254308801	0.0313475829645475	0.104464374299888	0.00544172171715867	0.0608282928804874	0.124276940236045	0.314866912132365	0.753406708836551	1.15449883292927
2008190	18	2.93395245011967	0.375085767867294	0.410532825526228	0.177009228821098	0.476744952460305	0.0648781906838565	1.1094195431567	1.2932217228756	1.71617531733395	2.1091147815362	0.207389114994754	0.0148676454892544	0.166796194810336	0.00498122311324732	0.0556775699501291	0.115595539587304	0.287827178884913	0.594514442694518	1.14210208567637
2008190	19	3.14786563060423	0.289228937580661	0.350850059468194	0.186116366531302	0.587719278111333	0.0960973187853472	0.927625917423192	1.31815257194084	1.48815070338202	1.95644906570451	0.195669659490218	0.00457870580251438	0.188092518527743	0.0046056326325805	0.0484755844790618	0.0829052745250325	0.571635430610564	0.497508460528183	1.15457702715409
2008190	20	3.10703868171094	0.195494264367375	0.256974603273838	0.207528785333519	0.552728218978254	0.081526953511978	0.84172093240682	2.10949949347985	1.31040536378971	1.88295773773595	0.186984374690856	0.00471635864448526	0.184792976768566	0.00430184017428035	0.0399741155556456	0.0230684066316838	1.21807319584225	0.877127645329148	1.14101925375667
2008190	21	2.77128453163534	0.167932180514398	0.19328197020137	0.258059540939287	0.815531432244076	0.0998308345695829	1.10566914418034	2.5259643011065	1.18113598930235	1.73390597762385	0.175352225648443	0.00581043810190001	0.145776533180913	0.00404029368659472	0.0315472971764281	0.0328529573160702	1.00619013663713	1.51388979068433	1.09298967294863
2008190	22	2.3818186400866	0.12591063205272	0.165681877439099	0.260679576087824	1.66070676663477	0.157102482022358	1.18686615002818	2.22208665206113	1.08851696184122	1.57913096123058	0.173954030868147	0.0070221541536397	0.116967758801552	0.00380628129532513	0.0250622789103062	0.101913746224037	0.580350955894904	1.67565031582293	0.913937393803807
2008190	23	2.07726060645228	0.131549866431402	0.149752057879998	0.185668158454055	1.83259569297843	0.141948994465783	1.15724133530667	1.3428644378033	1.05146457287461	1.43448017109712	0.18869858551795	0.00749023296517901	0.0839067516799452	0.00355671119418402	0.0204801709884989	0.142239455476529	0.351127904709869	1.78906187457597	0.782632494491033
2008191	0	2.00435811132124	0.218905993197923	0.144379040308618	0.1297540366902	1.16175334709995	0.12454212091148	1.16502541360702	0.827985755939789	1.03334918766057	1.19842899688658	0.176666448453704	0.00837867064736636	0.0568100058061468	0.00330050789886576	0.0190834268250534	0.176001751382648	0.284573407982457	1.80647392217012	0.682986066275763
2008191	1	1.96818408397022	0.212301235972263	0.149219835564746	0.106657320851519	0.723847255712824	0.149264973932656	1.38663115125443	0.788036350549105	1.02884597490751	1.4020183242554	0.157559367659803	0.0105718932400998	0.0378494221573022	0.00307113755007527	0.041198709105335	0.0858217395453349	0.243167444125111	1.71706650191645	0.64064763258206
2008191	2	1.79067595017879	0.22914931861856	0.158959017475859	0.0878109898122217	0.616094106906929	0.171817801779964	1.00754981819005	0.843525242252914	1.02483614415225	1.63980059248383	0.148143853768878	0.0133745245001119	0.0286746616259068	0.00290272724641143	0.0734264465762006	0.0825531201930538	0.248196348747102	1.5772085626523	0.756003799862584
2008191	3	1.57614943930477	0.304896206482939	0.170288752680056	0.13887403198901	0.593794422801972	0.17071942750105	0.648219043493504	0.927760922792327	1.02109847467757	1.87348054369286	0.15770257662051	0.0151493171681245	0.0235841203807448	0.0028152857044313	0.095269414269227	0.17791086265999	0.441420595340337	1.43093220538562	0.903791710477076
2008191	4	1.78032895398212	0.329851115367606	0.170671472629013	0.173286717268875	0.598567075387699	0.232313844687538	0.591742263696951	1.04948518240896	1.03045967113522	1.99399672868606	0.171783015210753	0.013777895294166	0.0169983346369478	0.00275295645936325	0.10250284520518	0.160681804207453	0.833982731501125	1.40143154412009	0.99853237552306
2008191	5	2.46823487268374	0.33325172435898	0.161388824937301	0.179624892808266	0.589196919197228	0.264643161306941	0.63158990718443	1.27170364034673	1.0448508753042	1.91913144444136	0.179648455819635	0.0141392211721323	0.0166390685109984	0.00274210900625667	0.113055928553065	0.0563620035220188	1.45134217015926	1.44188983271752	1.13142127255049
2008191	6	2.53589504443082	0.339736123843434	0.145693232420951	0.243369676705655	0.606933474524787	0.291005549685402	1.17205795557562	1.63335142258206	1.0764247138371	1.74101349501534	0.178966175447346	0.0163130745300331	0.0175735861382281	0.00260572712453623	0.118751065868211	0.0828262470366258	1.44892391560919	1.48609462160949	1.13906467568178
2008191	7	2.00652814912643	0.374272653066965	0.281661801208556	0.289891732190759	0.781223262313996	0.296490567755169	1.28361409777648	2.0707343866826	1.11103709925103	1.49732815167383	0.164515656354053	0.0185265379050405	0.0183556504663876	0.00221950568632959	0.112625392339805	0.165369666545617	1.07515399829836	1.55688565273873	1.07349297364961
2008191	8	1.46787890231176	0.399295387476499	0.28783646336859	0.26507014825018	1.07503138469124	0.304014043813041	0.998238376691447	2.18091490531829	1.13021057752797	1.23844148888328	0.146019864242497	0.0217751571356982	0.0205201140422927	0.00162148032522657	0.0877581018384937	0.163281322543851	0.625790165881119	1.59930319264929	0.95530540432657
2008191	9	1.24053851456713	0.421090459133255	0.245209569395449	0.252216104238423	1.45725238542401	0.367822396211001	0.819317102148993	1.98735491842466	1.13674822639946	1.13588656006465	0.134497060228492	0.0271051968639489	0.0318312489875533	0.00163926399457444	0.0230046216335518	0.176452992298407	0.539603506254968	1.60242659365606	0.853876320262629
2008191	10	1.19337164089421	0.448860824522279	0.201288586829201	0.293734277886786	1.53903528611609	0.339787447548769	0.710270386293697	1.54028384238565	1.11568749817296	1.07600199381133	0.127623893016659	0.0419021036671061	0.0419944124146276	0.00179467721979133	0.0186305818605388	0.170263546075001	0.452087805721643	1.56875973764258	0.742293664338575
2008191	11	1.21575720295801	0.395334091191646	0.149017725873602	0.256255227433595	1.35271627931752	0.28747193015736	0.64717120711662	0.745633159061669	1.07712124531175	1.02121546995936	0.123735542955102	0.0516236113473052	0.0425718264777346	0.0019769943427314	0.0720531360382211	0.161248055984862	0.402826555275487	1.5044907521602	0.555733115654284
2008191	12	1.21616612062874	0.399489897293172	0.111353964448139	0.177796182630053	1.15101231637723	0.256688716474746	0.620581350550347	0.481958239286117	1.02214883039082	0.981377065628497	0.113957604411413	0.0563246471733115	0.034498950674731	0.00235730515633428	0.129780809015419	0.148078307121552	0.387421589084099	1.43581174528486	0.312907116280992
2008191	13	1.18644128551576	0.522322120463522	0.0879156781288278	0.038714238931451	0.75576058709223	0.239021823190664	0.604372160959728	0.60045777309413	0.969851599844103	0.941351883857011	0.111735319612353	0.0679799295264316	0.0320910828018582	0.00232721603500925	0.128379806515264	0.134631097780202	0.404139038466015	1.36011644379663	0.149082245166366
2008191	14	1.12135376588788	0.562703002570777	0.0727091420537997	0.0186349052689994	0.397333401284803	0.196962915452139	0.59251265781457	0.656109164871642	0.930785675049526	0.938024733396044	0.119458386290427	0.0833166583622973	0.0308192267433147	0.00228931106101968	0.116503593649094	0.133814801515079	0.467277595649463	1.29103217418412	0.0727946269562569
2008191	15	1.01129141067292	0.470372302916214	0.0600147631143963	0.113040199564045	0.353089517957184	0.170916744416031	0.580944926372277	0.73636422241191	0.923722932353512	0.932746257231005	0.126474174506078	0.0989141086585565	0.0297877800696705	0.00211973853823846	0.113926675249192	0.124369316346105	0.598488997607875	1.23152299384213	0.0199593761110993
2008191	16	0.872146624031688	0.457450606410168	0.049386647445406	0.358640936011928	0.413696686572766	0.159168205577148	0.565293925763796	0.852243632415309	0.958601572769922	0.933838164245732	0.126888346040882	0.111808606695375	0.0307897089572272	0.0018858548586422	0.11314375062711	0.11698274306756	0.71025291945805	1.20944361034378	0.00100955625132701
2008191	17	0.767165901596372	0.483837376517804	0.0421316987790759	0.458827654744706	0.557142135319082	0.152310791795134	0.523218936484888	0.985178820604169	1.0180806440832	0.936557342070471	0.123030151953284	0.108119412465233	0.0264499407446556	0.00171423141737759	0.110041657887053	0.106172363057877	0.764502219731513	1.17113700647074	0.00055593603268712
2008191	18	0.731232491851505	0.436448732577946	0.034091652608087	0.428024060716399	0.624464310389956	0.133580680767043	0.456856671184924	1.05964340528424	1.10316373115469	0.954725578837986	0.128015425508547	0.0931251109039661	0.0248706576970357	0.00171389989300914	0.0879881792336847	0.0967212319929201	0.803758256321833	1.11879135637408	0.0245842272369552
2008191	19	0.721167256163029	0.396690105424748	0.0296307667505855	0.388634584854103	0.621132116311027	0.0937064367384391	0.456837472608542	1.02255922537719	1.15654600442021	0.91944854575914	0.147361102126371	0.0629723246612914	0.0550181042656125	0.00193755488936811	0.069042400790441	0.0870267269168767	0.814490669394749	1.05467399970612	0.112697821455705
2008191	20	0.755611176338583	0.354523560433019	0.0286724985585963	0.352932603839785	0.57302946531548	0.0631775336320156	0.557241376320957	0.909774373270381	1.14009359410871	1.08583884649622	0.167656449769703	0.0324799877307891	0.0679247719787718	0.00245704449539327	0.0599992684246698	0.0704040684560387	0.803120027614134	0.988710752928127	0.0657979559041786
2008191	21	0.808612016198416	0.263394795164886	0.0283537506240682	0.266211950196283	0.59149028777333	0.0181271086932506	0.596485522860669	0.860193165331695	1.15243574484243	1.47106029563071	0.187969361997298	0.0153357749902573	0.0776229200210155	0.004253935797696	0.057739886749754	0.0670438780622919	0.777728657706924	0.976894554592208	0.0168373550283533
2008191	22	0.840021334726705	0.125226882505331	0.0281960622013523	0.222159957177692	0.679364593466388	0.0129187701955085	0.736942196636795	0.901263277740184	1.09205577750078	2.19660031089846	0.217133194147394	0.00727785963504276	0.0792184625323011	0.00912281216576489	0.0719115246790678	0.0530434830610543	0.752097692255682	0.964065631142682	0.382339345352307
2008191	23	0.838354001687786	0.0421080055039865	0.0280208482557065	0.193381501330083	0.712903849662303	0.012162911642631	0.954510049089489	0.938430891783766	0.890474527114329	2.28583035362334	0.222330217193573	0.005410793362667	0.0765789095348465	0.0148220494002767	0.0938964802938599	0.024341190827211	0.708562991784234	0.932800635279456	1.0967253989232
2008192	0	0.796730831352601	0.00687104021991301	0.0281757113700142	0.189678609266978	0.662418466365447	0.0122754484184009	0.894342737495589	0.895623763900382	0.649593871002059	2.07100717492499	0.201135730603661	0.00859359676937484	0.072068170535369	0.019172336211355	0.0898451804564647	0.0140495121364048	0.638510168940813	0.893243470184247	0.453317231906599
2008192	1	0.807576318025764	0.00165433600374822	0.0285420435497319	0.199138781264535	0.61776460684181	0.0128097708040625	0.695475064191832	0.899217594334084	0.50001164518194	1.97108499815609	0.173863884425062	0.0172725958190244	0.0688207105143225	0.0224345002860051	0.0683026790637645	0.012536973764211	0.524175589325208	0.903119972469871	0.227235019412152
2008192	2	0.993562740994144	0.000766051697328788	0.0286205881219162	0.237915664168649	0.577795295870603	0.012725432128678	0.583753824379496	0.913629453407652	0.458468742241827	1.9060774751354	0.172120561670986	0.0212865145418196	0.068235770078023	0.0259060775481991	0.026627725269715	0.0131099995989037	0.3819793338192	0.938894638673341	0.201348532829663
2008192	3	1.23961222216248	0.000896697797611356	0.0284589468953481	0.230609869738568	0.551735766905034	0.00986898146077092	0.586662455960562	0.969313944942162	0.451641233817546	1.61298050601604	0.17035083419729	0.023611453607706	0.0692914601472845	0.0300480151524843	0.0110406363720488	0.0160029050409826	0.281565862888656	0.900309098686537	0.209719028611416
2008192	4	0.965698221297985	0.00264175600683022	0.0284329415914966	0.151313974970343	0.513684219613837	0.0184825787899883	0.689721058678096	1.0213711223931	0.538642249258058	1.38052601533727	0.159419910112587	0.0265147352370931	0.071090380585909	0.033455374024631	0.015890443570104	0.0186123104066734	0.231257898701522	0.651940804505849	0.252850683072105
2008192	5	0.107603479310264	0.00378081225489712	0.0315756526176626	0.069241059500089	0.492743615436658	0.0440427461853546	0.716568152119988	1.10132335031935	0.558864747741688	1.15274246776586	0.15284845198921	0.0243812345678536	0.0776076685327765	0.057442102010637	0.0214547989179603	0.0201491845868312	0.232179826060053	0.619486136758417	0.318693787841451
2008192	6	0.235606630992653	0.00129812494853721	0.0349732814703314	0.0705302167130179	0.535158704423986	0.0462989728243671	0.74468497580394	1.10192353450033	0.597881700620376	0.952878155135274	0.156995691668505	0.0253761030881304	0.13399134236567	0.13249928659842	0.0409264852867226	0.0209211572804495	0.25846918563378	0.636964394899487	0.445914916457854
2008192	7	0.290661517381004	0.000697012372718386	0.0533807121409302	0.124563706886357	0.6909704367299	0.0474486721629411	0.665356617386131	0.55802464807067	0.721621366627965	0.813975577220929	0.151646512306348	0.0268529365892575	0.228134888471469	0.0734079688440308	0.0474556451753625	0.0116913488130629	0.302093144423669	0.6885513533886	0.140744807111844
2008192	8	0.893073344608142	0.0153079443426559	0.0869839685944021	0.0413522764070888	0.80787927393266	0.045091067415053	0.583903750297374	0.167156390187227	0.879525804158198	0.613768577533481	0.133695228269943	0.0322106110147453	0.31284864001267	0.0611265144465588	0.042242897564107	0.00211710807722844	0.332161043375285	0.733014041056592	0.0553005722033967
2008192	9	1.41401959336834	0.0274400814995349	0.0697316197722704	0.0163977579729075	0.579726489613257	0.0361119135616189	0.492578762583086	0.109765767278577	1.01963294432738	0.453819740085905	0.111416928492935	0.0453003776294642	0.314733134138725	0.0580852048670686	0.0362811865369223	0.000681220995361374	0.348775524407272	0.763635843683029	0.0136604856891121
2008192	10	1.25700841684291	0.0752563568548111	0.0618584208407251	0.0093033884340799	0.165260856527139	0.034154155050851	0.449300829169506	0.246558652346299	1.06247246286194	0.304123524094731	0.100198675962673	0.0614487535157257	0.273780986338651	0.063836218838591	0.0310711271252769	0.000631446921120163	0.373553375850969	0.805819241193574	0.059490307353424
2008192	11	1.34926503650099	0.132328430466831	0.0511306575624954	0.00544950334317474	0.0618136750703558	0.0389346670346471	0.321216958878839	0.403699575409298	1.02040930360625	0.12959203294161	0.140491281671951	0.0834049565003743	0.259476581603984	0.0896215057715691	0.0300922541394537	0.00188542539506833	0.404231482330522	0.928359009303471	0.204633935020712
2008192	12	1.4429153199713	0.113212281570538	0.0409300747499558	0.00790144546564025	0.0560603101560278	0.0743575038363673	0.160169417770325	0.381774250804421	0.969391810116614	0.120538318036882	0.212373091152709	0.0897770323838225	0.239677535582061	0.109752247581757	0.0280967745260561	0.00786536987357198	0.385375486284444	1.06307655721356	0.287841004662027
2008192	13	1.49974672445409	0.172817941686291	0.0335601949620244	0.0166178056975257	0.0436161036949526	0.157887416262158	0.147188332293193	0.715695271643042	0.849398451309504	0.198650404370765	0.264218701306548	0.110530398169493	0.231662359913253	0.091741142461144	0.0255364697838863	0.0159901016491956	0.348243969777436	1.12168412623538	0.287049079812033
2008192	14	1.48946582738181	0.205249068524075	0.0293371677727258	0.040119170090556	0.0430831556541714	0.067107513591684	0.225894183270429	0.882610467067817	0.613496403276112	0.35263491629243	0.279936581522909	0.136383478423992	0.273222035427224	0.0617862747016568	0.0258799442486206	0.0297445642058946	0.313307016999592	1.10804560657884	0.357047346190922
2008192	15	1.22882975389773	0.195755416264197	0.0269357887330117	0.069372655408061	0.109503710638958	0.0433613947711863	0.252853806387597	0.593317731497635	0.439419130629252	0.447269040253119	0.265848480296954	0.140472673541671	0.322336907095213	0.058283758513244	0.0410758443257849	0.0688335460348729	0.288969699352304	1.0656432897506	0.478161835775869
2008192	16	1.00373470459421	0.0775324181703516	0.0260510897547641	0.0593725492313317	0.192370060136793	0.0364235215597488	0.275929445624824	0.448572858964103	0.531051000773656	0.52833086437831	0.248594069785098	0.140093229955544	0.35603972274404	0.0787035253189771	0.0508561126730716	0.164502325331525	0.26477224388454	0.881828844529483	0.474718540400476
2008192	17	1.00110358829573	0.0473214085827738	0.0263769575120466	0.0819846074082645	0.163342167108711	0.0351044368701184	0.252099360920778	0.743503438661889	0.745145236339646	0.671501927845432	0.229566579910334	0.137042837938317	0.426530903540067	0.0855776511145119	0.0504668134659046	0.153087938408102	0.243555418911233	0.643501214713521	0.419105908350138
2008192	18	1.15985983275571	0.010147634408896	0.0266413515361987	0.107286521749038	0.137266012661222	0.0357058023074373	0.273395315078926	1.23205020950623	0.965889305968147	0.703805604499752	0.181208009931907	0.131617797047888	0.574403339945854	0.0680417045053959	0.038958026930532	0.134354156793329	0.215433214512807	0.562610628002633	0.369280250233117
2008192	19	1.438980568392	0.0190426383181236	0.0239013729035206	0.105146466837531	0.174632755936383	0.0361684844887582	0.342732525189881	1.23104702690099	0.944052473120239	0.902690521583151	0.120035940866091	0.113371492243568	0.655948929907081	0.0750638075673894	0.0288563780645355	0.113676815102406	0.182344669644118	0.558319812166715	0.354961508763971
2008192	20	1.7028282263673	0.0332033398509453	0.0208329508702036	0.0812198291268008	0.192773066319788	0.0348824936362774	0.539585048369677	1.02440950787972	0.661183362259774	1.2919842993489	0.0964085039125565	0.0756987914150739	0.683359091371205	0.108273590423894	0.027563871986301	0.0956956504854572	0.172037915553929	0.657216423875907	0.348278052776616
2008192	21	1.92880408083329	0.0298939848678771	0.0198687479640357	0.020478209908097	0.220203752408728	0.0328299481303341	0.591279261306762	0.823480325223027	0.626166560187382	1.72780676226934	0.0969586974916493	0.0541807847561407	0.686907269128033	0.189418213795155	0.0280919435083439	0.0835134497873241	0.160459093877639	0.716204434714811	0.416822667482025
2008192	22	2.05574138233926	0.00782201143893714	0.0195297341880686	0.00919846318731193	0.364646313136793	0.0319602315353151	0.833910893454809	0.68975952360434	0.887645667800742	1.73593554053629	0.0996612371313767	0.0407085216013718	0.59758800026465	0.306011352492253	0.0272977884506364	0.077253369195606	0.124678234936611	0.518552111360143	0.56041179351559
2008192	23	2.08299603387881	0.00239213966103102	0.0197443521477228	0.0141556232960809	0.438436556051357	0.0328660854784806	1.09919608032661	0.647531745648558	0.961042738409357	1.62639392270724	0.10127904957244	0.038199853259404	0.602980206436817	0.424251015331683	0.0326067645340227	0.0764843524116443	0.0724325556274558	0.613231802535048	0.813152106072867
2008193	0	2.05451000362974	0.0074742959920079	0.0184251716449018	0.0229291309834521	0.404644709761334	0.0333196896022124	1.19252209562768	0.665294973349859	0.886179723148152	1.55597277909311	0.102530582034776	0.0351133983333511	1.01234668109537	0.374858992517067	0.0308388569072121	0.0843792810283924	0.0343995757560227	0.903721708744962	0.893765001127368
2008193	1	2.05691529561256	0.0183078318177491	0.0172533540553748	0.0212738970803955	0.322541090182548	0.0304205879732015	1.2106593026295	0.670179798595172	1.02261820940318	1.56209371992335	0.103416597249366	0.0282385893171972	0.968496444427464	0.370988461006089	0.0293565866665886	0.0654677407347435	0.0611022168768966	1.00798029403918	0.774904212224371
2008193	2	2.07553720715432	0.0292854400430675	0.0156656619641716	0.0196885229255239	0.167983744142934	0.0270998092534955	1.21214125629397	0.622343255708901	1.27473034314345	1.54839182379912	0.118815118173594	0.0254616228231563	0.804062987723998	0.337509546988829	0.0283140733958645	0.0498091594058715	0.101974531688476	1.16429865936223	0.526353582141991
2008193	3	2.04458477575663	0.00571882441293253	0.0140992382793213	0.0273508736879236	0.0626076793283306	0.0239189662198888	1.18105473395824	0.533175898277804	1.44735630978363	1.50635181852988	0.14894365251264	0.0240900935739146	0.997930064890963	0.246591341125028	0.0269992582849386	0.0416430142187383	0.0892663274066619	1.53801331649369	0.390358963079481
2008193	4	1.98632034307185	0.00125782813945496	0.0128281185655915	0.0346125521393811	0.0704605896362411	0.0234037525982813	1.0656108976926	0.475767618245173	1.56135898868992	1.57822235005552	0.195381883115124	0.0261841181161561	1.26416980538877	0.131709175087749	0.0312952615005575	0.0362002872603517	0.0815532049303948	1.73901498220516	0.228951088150712
2008193	5	2.19995808967989	0.00960609898790869	0.0116734219088109	0.0410526085210574	0.102560695660582	0.0219277401919437	0.863825574339179	0.428208463495081	1.62814770981766	1.67688326103958	0.249927201786281	0.0322379698975633	0.942944952952895	0.0914286151256763	0.0307755997168112	0.0313989377413556	0.0828524166126312	1.72270639338083	0.183805379941006
2008193	6	2.37884370714697	0.0166189844684076	0.0104826810196097	0.0494700459455367	0.0318560568584695	0.0209347839387032	0.838247103019494	0.373185178081565	1.71048254498833	1.57834725314533	0.329786404661658	0.0359256786600828	0.807100174678632	0.0721818684715745	0.0290613210984415	0.0230643118797285	0.0805924023818616	1.63819397155306	0.327413654342024
2008193	7	2.41850456927546	0.0540827488022815	0.0106096229760789	0.0434803470782444	0.0240292041777753	0.0198636165043297	0.949019420409558	0.332656501454675	1.74136224937958	1.30491141367294	0.421136148004496	0.0452549830085884	0.655497156649319	0.0024461828402307	0.0252010972060383	0.0204413361903222	0.0681423966155451	1.62915861014765	0.608218370020214
2008193	8	2.45025223119589	0.0867282007485785	0.0121203676942924	0.035478915781256	0.0822136038300832	0.0188991544400801	0.865428065251631	0.358335795054728	1.71507345513382	0.954112864122488	0.455028998897035	0.0645547721089881	0.59319419907194	0.00576187002134604	0.0352199683946055	0.0196707784957565	0.051021700810109	1.64193152499442	0.696024372783941
2008193	9	2.70343742705906	0.0849988697200587	0.0198965648135243	0.0378604722577189	0.147034005597257	0.0185295282138951	0.722764353939517	0.525686065382747	1.67145317896223	0.760281230254074	0.312394451104868	0.0918283487800212	0.480397819659348	0.0692513635254546	0.0465933677745922	0.0191251907533862	0.0498612772956802	1.63531588224179	0.659372929660894
2008193	10	2.65362515710265	0.0781518295263297	0.0210749389856485	0.0453409885063734	0.168426129550174	0.0194936376264773	0.538795676372906	0.851830123477158	1.50769155829305	0.946447384248532	0.349153032497129	0.111824861430907	0.462306294119336	0.157937547451384	0.0464331317468415	0.0205583291032862	0.0553045157981096	1.62665366296309	0.625922971255386
2008193	11	2.35830362741924	0.0696658771648436	0.0203643956343478	0.0438086944444315	0.178533612000951	0.020558272110623	0.363002315236593	1.0724001308302	1.19952568160436	1.73661145642118	0.804003814609207	0.111316781106294	0.399956531899451	0.164895561931636	0.0421229026684351	0.0221416681921435	0.0502069386648083	1.5734763276039	0.613898568953193
2008193	12	2.17007953366615	0.0627777977716492	0.0194249978205463	0.0380279941163639	0.226437573247072	0.0212463387638639	0.626267859088333	1.15258727601119	1.00642995087981	1.89219128295688	0.758550369007158	0.104279522130965	0.410207575105068	0.177871089014587	0.0391346083987378	0.0209844246888868	0.0499168098679399	1.47987761387563	0.499728185772358
2008193	13	2.44569682403277	0.0533838958225476	0.0174245270058594	0.0343082967159046	0.293472897926008	0.0199854652175982	1.09682570906465	1.02448980777769	1.01912816121461	1.94746675139803	0.467082355529119	0.0976955489722632	0.387441388508942	0.14203036559188	0.0369998938625707	0.0200291409186961	0.0542227941794344	1.30933793741721	0.404141234117433
2008193	14	3.00336117508151	0.0342210785842881	0.0145718261753277	0.0302294146026936	0.32187623294079	0.0179983257964274	0.988851197776421	0.840201486027402	0.928628415419154	1.97678143105832	0.62853454382122	0.0977688415553175	0.49855978756238	0.113226097686433	0.0339088781942344	0.0195492751417954	0.0597886849709627	1.14080730590636	0.338009181408172
2008193	15	3.06579039973027	0.0303411341585887	0.0126195835023868	0.0268383692010595	0.286361206469796	0.015675113089559	0.781291886635431	0.70211114047902	0.716654514365817	2.35597177126432	0.639755289421572	0.0966663622224303	0.31231704763959	0.100717960061516	0.0328721642344571	0.0192823396461552	0.0607797590420036	0.900647775386341	0.320344803170348
2008193	16	2.75424566246512	0.0383777560908035	0.0119704231695012	0.0210686971864012	0.209678296403549	0.0136902050934437	0.971837799071272	0.545516547713177	0.792955438278025	2.5514343409526	0.58765253497532	0.0940179499476152	0.354860672405385	0.0862658198120004	0.031170691002295	0.0194764796230779	0.0614908785500942	0.683805253976242	0.296656681612102
2008193	17	2.71293815148388	0.0354284115590253	0.0116609404098303	0.0168153024801514	0.134423928359143	0.0120679477210871	1.37834784541766	0.492253780174745	0.937465061027594	2.60699039649113	0.508328273123005	0.100161138159032	0.772416503938306	0.10123410280727	0.0295033522363491	0.0190981512921608	0.0578991779793237	0.901291915829233	0.265385918652316
2008193	18	2.50513514736411	0.0329167399612502	0.0105144025483436	0.0174576068934065	0.102689318445226	0.0110848627350059	1.46048247369522	0.598036931342501	0.931619704308902	2.36551754705575	0.458539892726142	0.107780790092067	1.24447396978651	0.123072376687	0.0216600801167299	0.017509697841334	0.0540179657988495	1.19053553424065	0.243436967599432
2008193	19	2.26913898083041	0.0291739969157635	0.00955700916874509	0.0244352190465941	0.103379116958018	0.0100030527109275	1.404597738242	0.796401598958144	0.894862592483163	2.3242830325964	0.425364635503568	0.114410508459525	1.40947170068677	0.130614324600718	0.018636999949673	0.0154133847087911	0.059683099593168	1.0082725700427	0.281483206310878
2008193	20	2.05616449722442	0.02668805885029	0.00939384007147864	0.0274597330950179	0.111010950385155	0.00960593589844542	1.25634057359934	0.774132718022916	0.976232110736662	2.74536086426132	0.41281025729349	0.106898961627534	1.61014105144165	0.116356652603288	0.0175704869971467	0.0137792561742841	0.0646132732588775	0.86535383771263	0.37184025104792
2008193	21	1.61028663619019	0.0241604951255373	0.00313506604992551	0.0250157162919392	0.129331568716244	0.00819449019920082	1.25411478724682	0.58595858275301	1.11229073791903	2.9538288218138	0.373408860626593	0.103002499405199	1.28836400170422	0.0894468272592694	0.0168185318043805	0.0138650745187358	0.0605906453761641	0.942253843008787	0.182656749528422
2008193	22	1.64953311497967	0.0209638860290813	0.000751847076491709	0.0191135088399197	0.14846789897388	0.00995450940645293	1.34845135886893	0.335009429896882	1.31895777396475	2.91937014215685	0.29352924670187	0.107481487541581	0.998277742903906	0.0868550036021529	0.0190377983109075	0.0131092165859556	0.0578097991189872	1.24510377247628	0.116210183368912
2008193	23	2.14502184274948	0.025780918650635	0.000663831434905129	0.0127080172183465	0.139662251209904	0.016376250756364	1.03039806035944	0.28790229976404	1.37886881432882	2.90225796335052	0.204675901841222	0.127710941040485	0.958334080821545	0.122475141013122	0.0211344822733903	0.0134079528936124	0.0532962859191516	1.5639539410246	0.119575168508793
2008194	0	2.51398716917441	0.0356809100658311	0.00317267340617484	0.01245638858538	0.11983166027342	0.0122271372731679	0.862157450487802	0.333356712122573	1.34599614051625	2.83074933245598	0.154255475995136	0.15686605619604	1.09789851699749	0.375115781081361	0.0239542205355395	0.0124946804765012	0.0493590322380518	1.61655990899728	0.178997558524945
2008194	1	2.59330410404422	0.0448298089043217	0.00529723342296997	0.0150083306967554	0.128344431302026	0.0208650171542772	0.734665413816957	0.311892706723196	1.23163437222093	2.72180895573465	0.141643499984147	0.0456538431239085	1.07078874549243	0.96875074986493	0.0269864827388556	0.0115852281691817	0.109664118230317	1.61682471155352	0.267063865624256
2008194	2	2.74448162427679	0.047737876319613	0.0101329917028696	0.0183431439578135	0.125053337844128	0.0311793356571769	0.704266288287074	0.272715046239713	1.0826209376815	2.82114814628996	0.155947899044005	0.0102291362764385	0.739796751083585	1.05412473774389	0.0220504211372825	0.0111914228580216	0.190098781909228	1.60614243760377	0.601123407757155
2008194	3	2.86128164031496	0.105831481501763	0.0213299422802829	0.0224180282950384	0.108692947203075	0.0251279136614055	1.09473019601992	0.242815764756619	0.932641501020473	2.64256660152811	0.177313844307094	0.000423726278826904	0.469008312063631	1.17843434753021	0.0174351174167167	0.0109890267327866	0.158375170386849	1.3367750060833	0.982951440700087
2008194	4	2.42719440746845	0.163527670721351	0.0356736887102884	0.0289015172537759	0.0236420483804872	0.0156731895931072	1.17065387456368	0.342175870367637	0.696799405518049	2.60745325168457	0.188831312768783	0.00129752583100251	0.401345278865239	1.21661551299184	0.0154691882336004	0.0106276403523128	0.0989700707145491	1.01321991109688	0.929736220835744
2008194	5	1.72167129702453	0.102698724123661	0.0637378122685186	0.0324967293403214	0.0280375925542097	0.0123713669320912	0.69971592787546	0.858914978357812	0.590896226145448	2.464555747753	0.189351266951072	0.00628712828529915	0.333403671825396	1.13454716997021	0.0145153362787964	0.0101502018787769	0.0757743403888054	0.734857398837355	0.599406351120647
2008194	6	1.33681538226323	0.161796467002881	0.097732398211307	0.0319408452250434	0.0638337611980336	0.0109520781367458	0.721792587632953	1.16196193427464	0.756139521342369	2.15590052999387	0.176767251853282	0.0472844534093038	0.242456158441476	0.920209724462754	0.0134403155287935	0.00970083477662353	0.0446392687385855	0.593226922880542	0.362384996596462
2008194	7	1.59561248582602	0.140412886122283	0.1747149923753	0.0335267860602449	0.23553897379519	0.00953476657257998	1.21593842477197	0.987865194534449	1.14139480540036	1.68585814669001	0.149649779090291	0.102800369492997	0.148396058990946	0.732851849681438	0.0125945306798618	0.00875823737440196	0.040734996757775	0.636875882707264	0.573290553791772
2008194	8	1.99906670998686	0.123925944733015	0.203395103449828	0.0352048709689073	0.568344913391987	0.0130083156529928	1.19622081524291	0.561135775580218	1.45527672808204	1.25303287417168	0.133623483828601	0.0988816605307763	0.10015923833543	0.603775383856263	0.0125992230704686	0.00960504758224896	0.045239808269196	0.808701442608677	1.94879836419865
2008194	9	2.71527339483888	0.184699175105245	0.204767018436216	0.0306923962495935	0.572826496658672	0.0178289836571972	0.982461395989857	0.350173123927239	1.55987190127962	0.724624050915317	0.133207462244995	0.0688857363534189	0.136715945538683	0.459554339651935	0.0124832399598069	0.0122089945033552	0.0469548824367036	1.21495814428045	2.22325359765401
2008194	10	2.900518472995	0.174791169484852	0.175590998175978	0.0245211948331592	0.45243511348768	0.0161024588270824	0.705056506425031	0.332371793651781	1.57934012014483	0.437214480819853	0.141077640912851	0.045744133586771	0.445007251530991	0.292816788705704	0.0126173011650556	0.0134877797183026	0.0518267031613933	1.61945396464446	2.03757490853962
2008194	11	3.0797277597828	0.189750072123011	0.146021038556557	0.0200975484191994	0.351600212725875	0.0196554073695935	0.26066078481675	0.354762211454457	1.50648611507975	0.643160594679527	0.161377858608447	0.0620263807096854	0.842413241697472	0.190520765595504	0.0125895975864831	0.01088001520354	0.060578469800557	1.71561347975467	1.85664048322807
2008194	12	3.32765915766283	0.271374819210745	0.124403492211437	0.0209263207388703	0.271045083713672	0.0344080264927311	0.231377240788608	0.477725130469007	1.39327957494171	1.08828730962753	0.200526450359394	0.0934122965581029	1.04104381917777	0.0808174726259545	0.0123605848638507	0.00611310507281724	0.0681437685804046	1.69016030385954	1.43631008394212
2008194	13	4.04039914811597	0.290478775075418	0.106099757774935	0.0558810253706877	0.188475586704896	0.0541627885843799	0.386487875096278	0.552370472320806	1.15506460981617	1.07194236054079	0.258184291604245	0.109266557990003	1.19997321857048	0.0390578747974123	0.0119769901226377	0.00271975266736448	0.0705242468554746	1.6467297520588	0.90096488503531
2008194	14	4.18022210998804	0.264113952071202	0.0929705698082637	0.0903851877578436	0.184994295823649	0.0645041092471588	0.563777210672813	0.586335974238196	0.782651671054872	1.76119139636637	0.316196167722639	0.0871336306788815	1.00002317297811	0.0296227709032077	0.0117524335173342	0.00204092301354536	0.0666000226450367	1.50600700613502	0.543481655127131
2008194	15	4.61683903230062	0.160512268377013	0.0772530286458701	0.100537905043302	0.344418621539437	0.07013991856389	1.31892183955808	1.28737214079031	0.918496449588646	2.53643948206066	0.327856035659205	0.0815555059295824	0.850764948902329	0.045980001888099	0.0115773695519858	0.00168342201647913	0.0614176924567152	1.19588263975373	0.406022284498665
2008194	16	4.90141181986325	0.0590428340099888	0.0582505185814554	0.112431729367238	0.381355695630824	0.0733712191615129	1.68163841844422	2.08261740325075	1.25966921725753	3.14992801705392	0.297337033439785	0.10771116745049	0.687604266019172	0.0748368453589395	0.0114153003531711	0.00116185388493192	0.0519843381300813	0.94407495977379	0.338479335288646
2008194	17	4.5803827912386	0.0274713169475293	0.0515796151569264	0.140417731065025	0.323325643324318	0.0831392081380041	1.83488508268197	2.23720083284009	2.08872829086927	3.20483850565704	0.231542324120188	0.145263768073871	0.552194593582428	0.0828489152625138	0.0109275955391368	0.000862345768580268	0.0407986332583833	1.15466498856855	0.398133116096123
2008194	18	4.32364601147869	0.0720075263142273	0.0462744988885648	0.139478766658278	0.307288324058956	0.115800344859753	1.94076563738465	2.41412708341011	2.50868720249641	3.34565472493215	0.18645829318622	0.179960587618119	0.4019224461096	0.100784741796552	0.00986917084812504	0.000693986456900051	0.033986352140542	1.70483304628862	0.514526477022206
2008194	19	4.15989016284684	0.229134632036963	0.0428755203369567	0.113522770278976	0.445649611644119	0.13422923115802	2.21143164829205	2.75206147739067	2.31289367615436	3.69795696309658	0.156235687464703	0.204236355286417	0.276541872175745	0.147517261720449	0.00917883802744554	0.000745424781911969	0.033742314211818	2.27719898156221	0.563940911952434
2008194	20	3.87217402665076	0.319946284458322	0.0407578585359134	0.0527020655245261	0.76354554790233	0.117201688562203	2.37210110828208	2.8017968010588	2.152943648531	3.95028615812254	0.133562352672246	0.22003601712198	0.220344096762615	0.361065663761128	0.00870994175906554	0.00150943767324683	0.040774463135247	2.24536513544507	0.552949093203043
2008194	21	3.3258297000055	0.339621916998079	0.0394198362590365	0.024786001059891	0.936851739480076	0.0968290788521355	2.4311170309699	2.65053338105768	2.33417066387493	4.17690948991251	0.113580127047913	0.224249340818097	0.327717687824416	0.606835100564493	0.00842296363967155	0.00851672088818794	0.0470761813128268	2.18592476306162	0.524396708712425
2008194	22	2.15100574011486	0.314914518661031	0.0385124409932117	0.0328348025345799	1.07546175214204	0.080380831722119	2.53130429994617	2.32115972117618	2.60807913127891	3.88270198429031	0.106493536761842	0.221128876635142	0.609980241320669	0.912086657150769	0.0081841994581714	0.0290350612389006	0.0528571363185384	2.22901914747517	0.49491117820892
2008194	23	1.78717360532089	0.248032068785272	0.0373758172260782	0.0541359605385653	1.06784959974505	0.0716903511052529	2.51460145347252	1.81604752414721	2.55937920647166	3.21653578988452	0.117379351876822	0.210793684034628	1.24908486284247	1.21640818730456	0.00802821937998025	0.042170397624276	0.056006704244564	2.32670568869865	0.40427528041413
2008195	0	1.80149125530088	0.19821159668394	0.0369676207714529	0.0716319461345022	0.906503054502946	0.0591103299017382	2.20187055390843	1.21679934413135	2.47971943687546	2.78338682122857	0.128080504578193	0.193074258761475	1.72566330223897	1.24531372794338	0.00796369586305372	0.0452921941356159	0.0522377275586808	2.34564170990592	0.332790879604205
2008195	1	1.71746343419768	0.15757475826316	0.0381779708394885	0.093437490314723	0.755696777307596	0.0457301901396056	1.80733895291862	0.876155053338081	2.42294769058331	2.66131218650212	0.137929318590095	0.179510226568666	1.87952346376319	0.771014809988243	0.00804292585199762	0.0198651045068957	0.0473830528942686	2.34175063084175	0.272722804248439
2008195	2	1.95306035752498	0.141029172293655	0.0398799055251145	0.11360105105325	0.648108053556725	0.0364317142557214	1.29010487955052	0.705412257405804	2.28910326441237	2.56932066641945	0.152575416906504	0.170704180757904	1.88980419706563	0.582879472040719	0.0083486356971177	0.00844156366865651	0.0527946763212698	2.43757383744248	0.236867400441277
2008195	3	2.26646691748421	0.129909143400747	0.0455091475992439	0.12458204353461	0.602940088045509	0.0324917820322799	0.933678954348748	0.507192761964872	2.15843438669024	2.40111576060955	0.200972397225447	0.157822036626257	2.01184630393096	0.419321613786135	0.00848283997955689	0.00971733848111504	0.0640505320521616	2.42540953979498	0.241362265726723
2008195	4	2.54935621360781	0.125129244669456	0.0534383034845527	0.13483591593106	0.561203112590534	0.0324033561297085	0.816729337743122	0.416683952358101	2.00004811149921	2.26191113755765	0.309118427865394	0.143242752495061	1.86669671234359	0.188110765451365	0.00877942758140393	0.0153897698945167	0.0876387153430936	2.12644613176274	0.271204455909367
2008195	5	2.81247186031976	0.127853873169614	0.0527254424257173	0.168583736808818	0.480931489785079	0.0305810671231621	0.897593937942061	0.401167713217743	1.5227637598655	2.1800867678557	0.414298796985206	0.122781746227069	1.66283643438281	0.275485126708882	0.00872785462665034	0.0252929538618719	0.140938164044118	1.88933222202704	0.302624723021434
2008195	6	3.10685116535899	0.193006840985658	0.0745435547633967	0.221033503878344	0.389089866850197	0.027381628390435	1.25347093586044	0.376357340539016	1.53078653939398	2.53978607748945	0.421133997476374	0.111694672642732	1.35942104728028	0.592769904800406	0.00871587548472978	0.030258427660642	0.229867218271888	1.74351562491207	0.317432054471749
2008195	7	3.28249658782008	0.200914172943538	0.0705662187754734	0.239149468193992	0.348968557230905	0.0412079985422866	1.30531606871473	0.357444953609056	1.4386163696545	2.86982007733775	0.307042090448357	0.112983226697492	1.12010731389467	0.649442051201279	0.00903293360763175	0.027241415991505	0.380517485197765	1.8600777428171	0.37302687067584
2008195	8	3.34529791130142	0.178241961295773	0.16219049887284	0.222258753102278	0.311075361019322	0.0602004731961379	1.37994652070942	0.353314795292207	1.43098339686925	2.98506282648393	0.234342642283993	0.115485858588498	0.858336552810887	0.697355085148474	0.00873633309934648	0.0145081363194294	0.547993143103156	1.77377125415777	0.389202466065365
2008195	9	3.32950221499952	0.154817174308653	0.213707244426007	0.219349595055123	0.280101107623906	0.0693225577772192	1.56964640045192	0.35407859695513	1.62897983439654	2.81681417954737	0.253898603008644	0.110580628269447	0.630290161509203	0.747077405099689	0.00933261952773582	0.00177814934413523	0.618515278488377	1.59051327324712	0.372209739348014
2008195	10	3.3760905936194	0.121184958527067	0.200207097959452	0.215771259716868	0.248253141205165	0.0757524347596631	1.66323528888797	0.336417785135923	1.78011039297518	2.40300125799429	0.252934271242664	0.105566295564182	0.426961732164977	0.650977516378481	0.0105260087709382	7.32701517225452e-05	0.624637162552886	1.57295759878816	0.365786672395142
2008195	11	3.34894739218054	0.0845387708097649	0.132916887626895	0.206387793708889	0.224809888255942	0.0717948684261781	1.68979067932363	0.327808718827316	1.8654884977388	1.94753020621005	0.234748819249784	0.106999999544344	0.25418454762922	0.524702463001886	0.0110504643066963	6.59492485982725e-05	0.614743266481739	1.5777092465094	0.354595503905025
2008195	12	2.92570359829635	0.0563670144629748	0.0796514713099096	0.190031012694721	0.213880616451128	0.0706819790628154	1.72291496968881	0.33607002668905	1.81071836297965	1.50127610697946	0.250455101903624	0.101762869572443	0.212421040429045	0.455639146263515	0.0105549173693156	0.000332427367221199	0.607044492054702	1.62922945590865	0.325908585119889
2008195	13	2.06702955050772	0.0377756386676225	0.057061930813457	0.182517592469473	0.203079442300075	0.0731384334036813	1.55318252806433	0.373999420630867	1.64004017102885	1.05838785405927	0.288951878126963	0.109777212650898	0.160208256454351	0.345423489984246	0.0118157738756408	0.00205873527416501	0.605901932503178	1.82957808182738	0.260926042624831
2008195	14	1.14002307103256	0.0329952866011052	0.0497845752401615	0.159698614081141	0.188883046624464	0.0754766520925755	1.31882411538086	0.421474434957898	1.57591851671665	0.667380878411288	0.325513468275118	0.111191562516756	0.142181709033881	0.254824171178762	0.0176445998557936	0.00971726761378331	0.600620910349578	1.86900755948462	0.222575203853327
2008195	15	0.795935564831809	0.0295583640189396	0.044726897749136	0.144351647624482	0.174481073343028	0.0684065572231002	1.01766243816169	0.505210375511252	1.56880356719135	0.39737018538829	0.375700899453775	0.112801487952448	0.0998199264677951	0.192958756169535	0.024503988569496	0.0242829402989067	0.598255602876163	1.85846686936326	0.204232978981043
2008195	16	1.48083770889758	0.0269780825893069	0.0404509068534515	0.123043933019294	0.165033084377044	0.0549133606205279	0.79133799746419	0.634840725555412	1.60129853322278	0.353612708961579	0.413971411554447	0.132076865247121	0.0883797488787887	0.129260884737746	0.0259870374330124	0.0395934589595606	0.584336058129005	1.83503560601632	0.200901602198128
2008195	17	1.90240663372493	0.0256277142726034	0.0399174656061211	0.0993989805658806	0.163740448318169	0.0444348917741096	0.493731597690651	0.837647996032943	1.64395971446289	0.582137188000198	0.438009874631452	0.158753923768251	0.0787826515553561	0.110872010702131	0.0241047528693591	0.0510369554337896	0.562178845114275	1.7858058436019	0.21088075557243
2008195	18	1.93955322793795	0.0262862541381682	0.0382659241016704	0.0802644062317785	0.168818933217576	0.0387995501449553	0.26356383423788	1.10633800560435	1.66984221160422	0.98258755333079	0.461175156178455	0.189634170652418	0.133432443060663	0.0897680962950079	0.0210705496617956	0.0351677026738846	0.528060018545141	1.75989061228961	0.227508990882314
2008195	19	1.73817601068016	0.0243916415358565	0.0384646592749403	0.0603077609196161	0.172247050231072	0.0372002403768306	0.18005611403429	1.27886980873814	1.6902009704564	1.18529123449603	0.458376721372136	0.208113566083436	0.197556351170641	0.0880816005523561	0.0145614533035671	0.0222090748456444	0.500480026501629	1.72774673495121	0.198423966771123
2008195	20	1.41360632656619	0.0240504428970559	0.0419397087176582	0.0384728710359242	0.178369633346067	0.0402287307951529	0.288452608663082	1.07605513807708	1.68831756210867	1.30001353894034	0.426183891642086	0.18923645781537	0.197472567251114	0.0985766544547441	0.008066799180841	0.00492603554680277	0.483045030921817	1.67194599149862	0.131948243963669
2008195	21	1.11597362223153	0.0253929118248484	0.0412948791330756	0.0262175149608355	0.189983907864806	0.0496457027238483	0.604840576917759	0.664077453581267	1.60253644006722	1.49458475171605	0.386781245329702	0.157617974860646	0.179214636027937	0.100938078420213	0.00650775644822887	0.0012725627999859	0.469852736822518	1.61371398397507	0.126190572760029
2008195	22	0.944021862189298	0.025577293817843	0.038156542250741	0.0235697985741195	0.208712623934649	0.0552824343040089	0.938563108487641	0.685895442039015	1.41082812899255	1.71383187165355	0.361687436299021	0.134582391784807	0.148869035726856	0.0990400786305725	0.00577462574042843	0.00159079499510507	0.446252194082306	1.46621913847892	0.161842772869661
2008195	23	0.842724180657046	0.0266723689946953	0.0411813259493715	0.0229350569588201	0.263220320871421	0.0376761357718275	1.20906400821449	1.23704032760622	0.956673633182326	1.71240457387658	0.354795699162368	0.130382188102098	0.126509973025342	0.0981313644083997	0.00509021238145788	0.00147196783561572	0.411446815863678	1.20912490821901	0.208190736262862
2008196	0	0.764668906044895	0.0312198248687098	0.0437217042106104	0.0216399708144917	0.411346953999427	0.0206089177010009	1.27107551684056	1.33648588146287	0.592027933257997	1.53195096788893	0.355079764330164	0.155737792297179	0.118024585541808	0.0997926325897637	0.00502098187783457	0.00117825839241075	0.375109419267397	0.857806465466747	0.245820586889777
2008196	1	0.705382639261065	0.0369562823543983	0.0451755436866996	0.0199046785564211	0.504961451989435	0.017307299919833	0.924842348356806	1.28269481623376	0.652726387328127	1.30682782029967	0.34130497352229	0.186882784969531	0.115754207304456	0.105580344028773	0.00549652253461909	0.00209503888288435	0.339027738428253	0.788725357470143	0.28626941692732
2008196	2	0.684313072090631	0.0406972199593227	0.0435561718980239	0.0185297138773657	0.501509047103576	0.0166886641034107	0.746357568645029	1.18927148827822	0.978653372624721	1.17614474654208	0.312750951942634	0.205279894428392	0.121646031788844	0.127661412761946	0.00577118834297216	0.0034826691836447	0.321638187783411	0.986909294894626	0.340084205638582
2008196	3	0.708861176703554	0.0566176492049316	0.0382457480263743	0.0178543797406659	0.707890255037687	0.0167064737537757	0.746879429516239	1.16342215662504	1.43567838962001	1.10021391306761	0.283355077593557	0.213012338494784	0.148900300393541	0.173376065810215	0.00599895357770895	0.00438516494177	0.302322117098294	1.38756266365426	0.44375771169249
2008196	4	0.770075802667888	0.0899514812207762	0.0306405883951611	0.0176220607774738	1.02864790018661	0.0169740582165536	0.671629954114499	1.18611409666941	1.61070699262804	1.101031018394	0.261222357653243	0.136578988228139	0.205367731736454	0.278324210558021	0.00639873394682141	0.00651502871711078	0.295233820812087	1.78695738666196	0.585567915112103
2008196	5	0.828342082080756	0.239265279558786	0.0270117863203204	0.0279374401528809	1.04503721980519	0.026401845145159	0.889730819393189	1.20234521632292	1.64870303834951	1.21233960687107	0.245282541802407	0.120864443283881	0.473911753535766	0.340203046000812	0.0080136851015502	0.01233011870519	0.262262686232135	1.89256685328601	1.13730927715629
2008196	6	0.835342053253334	0.576133256441211	0.0283231657856917	0.251117607324052	1.01667592325248	0.0360083090960837	0.754787391201101	1.14093857765862	1.53013871617706	1.24724699001441	0.231554155458116	0.133432497627981	0.596090365200891	0.209862193747445	0.0092692719584658	0.0187354075311814	0.2266486966115	1.89304848560271	1.27416800450225
2008196	7	0.850632651111421	0.571015046962276	0.0238565275249441	0.499559094114026	0.971718004690094	0.0619136873667366	0.708169309565312	1.02903386270636	1.36791919565981	1.20002140168215	0.224514637602464	0.141978736521516	0.557433066949398	0.211519472569972	0.00900558765882056	0.0203551736391484	0.205064094582483	1.8572536374369	1.05742409801482
2008196	8	0.947458136554666	0.603668536536352	0.0209392571161493	0.618559457722115	0.9370233635703	0.229558176844939	0.779699384393138	0.915223507263572	1.25416714038724	1.09083221089819	0.215148145915907	0.151598709830001	0.445448109427267	0.223128518993758	0.00922075434509885	0.0224823821074574	0.190921340728667	1.72406463299348	0.697535995113927
2008196	9	1.10748004057259	0.455120358416091	0.0249709198837246	0.565556426621907	0.914618757256364	0.263152807029428	0.684385793721503	0.830557238939102	1.20303515390791	1.05373625190479	0.198130818698751	0.139885171254323	0.306819691918789	0.188647619711378	0.00906477752367267	0.020077457419062	0.192899913152968	1.62638541424956	0.361976549165364
2008196	10	1.19650130197362	0.363046913805324	0.0237219403024731	0.473617571825018	0.850835656198639	0.269039448761575	0.66973300336938	0.775874659044469	1.14968126166091	1.03745693816659	0.181566417145798	0.11853322812233	0.182004685435897	0.141445459957586	0.00995283207909886	0.0198722457475702	0.215093995431636	1.47067938640767	0.209325118031275
2008196	11	1.25178408947649	0.319630930119888	0.029122572731273	0.389457417613737	0.777665572978558	0.245696874924446	0.633006458799899	0.736116341005402	1.07249197505936	1.0848749091358	0.16713887666232	0.106604384111781	0.170239439715077	0.113300093714746	0.0100446991800465	0.0252705345052403	0.272344338109371	1.34998496697576	0.16230581916481
2008196	12	1.3058888502982	0.25307419213992	0.0362561535718329	0.334274265464056	0.70925074884841	0.207869994037912	0.621566367225668	0.728621792744714	0.988571667926763	1.20812699148953	0.164773376094949	0.107037139625248	0.166088324913157	0.102172867689748	0.00658241736373674	0.0292954554520186	0.339005851589324	1.20268040315988	0.180053416020976
2008196	13	1.49342523822821	0.197445233848605	0.0335501622383295	0.266963092356141	0.675814350031514	0.182633525697632	0.604788070080834	0.777977934046703	0.872738600804722	1.19212771805768	0.15148617856499	0.0990448875127792	0.121372028342434	0.0959593635366578	0.00435638007646876	0.0273500876803254	0.409430045550221	0.957373765215835	0.22623766625995
2008196	14	1.622031363243	0.152600877403961	0.0280642790779157	0.220886387975486	0.667565447086336	0.161028669529137	0.600632824339678	0.83820652629542	0.745379465905498	1.16801155831212	0.13379862535245	0.0882852691735388	0.134639420364174	0.0927726290805081	0.00343459302250789	0.0254273262117465	0.450230735703304	0.801774108990101	0.2648184838684
2008196	15	1.64587306687273	0.118113141429223	0.025444440689972	0.194839744229632	0.680599233350765	0.137188479880348	0.611112489926188	0.862702570100403	0.652120348244128	1.58113969412331	0.124633165733512	0.0767174455156749	0.219264137305076	0.0959603992336541	0.00289385001575659	0.0209430193510503	0.490509351426076	0.764042969763594	0.306816720567458
2008196	16	2.02904158699623	0.0943614976913685	0.0252192810991261	0.168277879488743	0.709963027789425	0.118641595373715	0.713902763088004	0.880173569222847	0.628220566285179	2.0090136728711	0.119476598959109	0.0668734336341166	0.433078976886263	0.109130230137464	0.00266914141850648	0.0194375922826767	0.558138749075346	0.834766543253198	0.346733823968056
2008196	17	2.7600780050187	0.0802483057444581	0.0214775046613113	0.151029074398588	0.733900437328029	0.109316869964892	1.10830085110385	0.899799474619768	0.63999387657089	1.89712423694712	0.114833574286655	0.061532451091578	0.459723644902442	0.141027842012712	0.00214821920809996	0.0235022509048718	0.556722083670545	1.01675961123318	0.338011639619237
2008196	18	2.86961923661719	0.0698706992904021	0.0185269229853448	0.130915335190145	0.748355613054299	0.0790154852510463	1.35026114877465	0.960564523395648	0.691868455214654	1.79994176287139	0.113522894737625	0.0575133909594688	0.405398864299447	0.152042117901287	0.00178822415413438	0.0224468421757722	0.551428866372293	1.23217207220503	0.391780933395685
2008196	19	2.20965763082061	0.0534403277917787	0.0166430577507351	0.11194907667594	0.767393461489637	0.0491526413371893	1.24995057698874	1.03382765651752	1.04136723179653	1.85238337408401	0.119038491643512	0.0552831686210333	0.371582139167044	0.124912532987945	0.00173771430560629	0.0194570981277236	0.550040575232991	1.5823729828862	0.467738057706953
2008196	20	1.92599843698722	0.046601834328488	0.0155697806929892	0.0820533861121771	0.784591256497375	0.0399153541512276	1.35265580099918	1.20315613223338	1.46183473844035	1.92148279286465	0.131427946111536	0.0704547875880536	0.351406843269942	0.0624611831577135	0.0042807541564142	0.0229913312400337	0.542226701905105	1.94366629346214	0.456092732212409
2008196	21	2.11179404899079	0.0455167947772966	0.0150085759840723	0.0710407237068481	0.830282198468002	0.0355412852991969	1.43560639755928	1.79819122175734	1.75577541220703	2.14487711980319	0.147727893362442	0.159348687645508	0.354624973530898	0.0394336477302084	0.0142869085999756	0.0537712341702155	0.523304908758225	1.9731914400722	0.373513056905791
2008196	22	2.16546347733757	0.0580141032643979	0.0146394626552102	0.0664679520504533	0.850967933015161	0.0327507582331777	1.55977259189546	1.86818341605012	1.81616199875945	2.19762823787327	0.162732848430916	0.239500575394895	0.370592144455499	0.02419978485043	0.034924220580746	0.0669358188333481	0.496621053670079	2.24633469396486	0.351976808880718
2008196	23	2.2035439687391	0.0783360703462114	0.01442988164518	0.0653038739279305	0.963885536227619	0.0304697839033225	1.76112275917707	1.5237574304051	1.93214014807833	2.3293981294841	0.17789287391181	0.212444417937537	0.395411413259834	0.0233723139337189	0.0545838849992126	0.0643410164572464	0.451303826167582	3.07833597462679	0.398532607695186
2008197	0	2.23443612364552	0.103259034129846	0.0144444348638724	0.0676434532629911	1.43449136093625	0.0283176474738013	1.95031314039498	1.38285215702029	2.65585105835032	2.2569856681739	0.191296937367734	0.12470141298472	0.375025284352763	0.0226407983392423	0.0668176532930929	0.0694145332045299	0.415515940520874	3.24032334365127	0.446846894398476
2008197	1	1.97235052237729	0.146140072462297	0.0147242918434629	0.0839747444990058	1.38634386024609	0.0281982449581973	1.94402090603393	1.40164058829737	2.95910082111179	2.00544035124458	0.189753748267405	0.117462065566037	0.322134039038451	0.0233257309788062	0.0734941886763054	0.0764030465816391	0.403732050453139	3.18139589662813	0.520596839770666
2008197	2	1.40881504857436	0.3351298568035	0.0150792263828717	0.152853167206992	1.18844334494949	0.0282994148783975	1.79024710398083	1.43273759619272	2.83253017498057	2.02768761424727	0.178478217244518	0.109390139654485	0.295284723434742	0.0249188489606777	0.0787176420567989	0.0718090054037396	0.442542099428854	3.14766456866668	0.600975245505748
2008197	3	1.11644813272165	0.445090277135741	0.0153239916935096	0.345405597455186	1.09442175200142	0.0275028231846406	1.70511714075478	1.50132970797262	2.67018636964321	1.83237607751223	0.173180017367904	0.095543826122312	0.334776733726212	0.0267702972824529	0.0670455064068687	0.0701853849930994	0.598160674805634	3.18699185985993	0.665267986444469
2008197	4	0.997627364999616	0.474276102905022	0.0153999919419937	0.540579853835057	1.15151860832771	0.0326997800698232	1.6381482696886	1.589220222021	2.58905134217975	1.30535010882877	0.178300893509952	0.0738538198313147	0.456048050443655	0.0284628863543008	0.0785394376340272	0.0655511617478935	0.767846628989831	3.11462318600678	0.672010545009218
2008197	5	1.00217619622304	0.513981031377042	0.0153772023040358	0.494227032187611	1.19169053755697	0.051138926178729	1.32327016661854	1.56851654735922	2.79928765176262	1.10365470837069	0.196515413558903	0.0483262986867291	0.549019866223877	0.0359329506293803	0.0989999568987992	0.0615005058436728	0.783474122261415	3.09363300274131	0.616717147397281
2008197	6	1.15308911888138	0.59489740063599	0.015317010473414	0.515644467952074	1.18765738991753	0.0566751846573065	0.911645564217134	1.55941963620643	2.60171948886391	1.02516192887939	0.21049733375898	0.0344550668202073	0.504089066620298	0.0592242597476497	0.196546153165645	0.0696846774939667	0.743922699525933	3.15588312417118	0.483526266187884
2008197	7	1.36101605105234	0.575197793773827	0.0190373137961953	0.616598457189157	1.22139166766291	0.131579138991994	0.686669882032457	1.22859017449961	2.13344180101097	1.13847839411168	0.211476240549765	0.0296924614172949	0.384401503823155	0.0892080934755139	0.286686691882501	0.060897776640964	0.682061536274163	3.03466841110721	0.313684269205433
2008197	8	1.57816162744338	0.454841221777521	0.0306619608472652	0.633759218861451	1.15215986229503	0.160624564557114	0.532095717500318	1.03726772232618	1.62796087653005	1.36886410594885	0.272629989603012	0.0265418285787169	0.562935259559664	0.185253412298765	0.303718920062925	0.0576190014215905	0.659599755619346	2.55936837113427	0.174569371321231
2008197	9	1.71764280747358	0.334351817580928	0.0417815057782684	0.56823517469728	1.10707168847279	0.141328672766428	0.480674448060283	0.899634512243348	1.30922144450003	1.40256386875383	0.357731404915074	0.03442268500199	0.97502630072252	0.169089958839489	0.308514488285213	0.0572193842438903	0.778390705523159	1.86867852323454	0.122945095443303
2008197	10	1.8188862448066	0.295414973660421	0.0504681267858043	0.445954265457421	0.999545918445015	0.142631221599035	0.526670990810027	0.762082759004057	1.06907612564404	1.75550630625596	0.363041039381733	0.0532800464066235	1.27762098316543	0.182659190699503	0.298174537989014	0.0610656052025252	0.929635248109433	1.41366971306099	0.0996260454174372
2008197	11	2.15591719590651	0.246767492760064	0.0573995512743915	0.341470325850788	0.880897933540177	0.168975965377172	0.546797691397469	0.688808235579448	0.822624901049986	2.16538926077081	0.326752848668967	0.0842517937896893	1.18348732123134	0.189091901301232	0.29415954245947	0.0724492475356555	0.966778803355563	1.22712072615648	0.147026481709129
2008197	12	2.57740447482695	0.198742419293003	0.0469133548184981	0.243885286336429	0.777955432806517	0.176499039424185	0.906244748189046	0.726877229350885	0.69968618603718	2.14154588865672	0.236714282880497	0.0988135029659805	1.11575678248454	0.128330206213928	0.270163653724491	0.0610693734102599	0.989330178275306	1.17801745629134	0.236695102624827
2008197	13	2.71346499025246	0.150751566074973	0.0391007958366926	0.167235324769379	0.647832265335905	0.120960321673259	1.07452973377816	0.897760285928247	0.760354316819228	1.86034686856285	0.177609506504045	0.115210132831785	1.0868302534239	0.0889450161577309	0.234839722695759	0.052549503438381	1.00208795943996	1.34697555423379	0.309974017061377
2008197	14	2.58049130347355	0.113697344341389	0.0344518621261092	0.123227201745521	0.577121401974477	0.0940243770567676	0.790925141148774	1.07944409714038	0.929274573682807	1.91514520183507	0.195543950223643	0.130860386150196	0.787439482317627	0.0581210330400455	0.197135174246914	0.044732794744018	1.00068178477946	1.51829084302501	0.280743384840116
2008197	15	2.31645140476327	0.086985638003685	0.030850976203578	0.108387527619075	0.587761084355014	0.0836372970489197	0.546837364641683	1.19275820996268	0.882132520291379	1.68488933506716	0.266271189678237	0.139377031063548	0.150592283265944	0.0398805114171226	0.167023799683659	0.0518437975844767	0.997297726504618	1.40560626597091	0.22310548016761
2008197	16	2.22942158817445	0.0645386208282288	0.0278400890773987	0.101256580842789	0.778529579442612	0.0776571678731495	0.690261152001542	1.36009817300454	0.81520635160823	1.50455216765386	0.348963372590227	0.156195778305738	0.0123733181776757	0.0228584295126674	0.145542880179833	0.0584598675007409	0.960451183222894	1.2108518184614	0.302690124890578
2008197	17	1.24448118090563	0.04905152782993	0.0243741046419994	0.0911492223355122	0.808724553498897	0.0743316507737281	0.790009022678795	1.37616817952692	0.807177837107232	1.95287349017163	0.493001393990529	0.191155568470397	0.00925065835815082	0.00508056664376074	0.123072479047943	0.0687378657543633	0.867496290854846	1.27273157107384	0.35650554740604
2008197	18	1.15816265747278	0.0453776686786392	0.0212434736180881	0.0746152641328745	0.76544170093578	0.0613935792560942	0.928345715088907	1.38501380599057	0.932830691617064	2.01970164110994	0.603607182886877	0.212601584366938	0.0773402630783378	0.00228492167148502	0.101375993596432	0.078072057389431	0.763339653925096	1.49418419297415	0.3157566666997
2008197	19	1.29291264803418	0.0403825105804899	0.0168921926057851	0.0601385456506231	0.815787104602734	0.0552689623598484	1.02834525706226	1.16225186487988	1.11542314906658	2.45893259557003	0.611813321932411	0.217182488104471	0.224654821286882	0.00933960296056377	0.0750769758272892	0.0841807978685065	0.642590825729906	1.88066489360227	0.32701106999408
2008197	20	1.1546919522371	0.0290255280885348	0.0148089239916214	0.0605882859527052	0.897150712921988	0.0484456176546404	1.1489208725359	0.933882924392059	1.26416919309893	2.40463282900159	0.588967428896834	0.210682159593139	0.416839143324822	0.0329914983857476	0.0525603739676538	0.0787415142767788	0.518001383036568	1.98659014091231	0.448792997701662
2008197	21	1.15654048800197	0.0247247399092535	0.0133504800932275	0.0656816319877957	0.887484745125539	0.0429621323040413	1.34751726415032	0.858539685844004	1.31912861780916	1.62902566633667	0.56632387520286	0.195987701436948	0.454935204216405	0.05668605879833	0.0396937060085737	0.0737319466157602	0.462578323014922	1.92020257323732	0.62868265307451
2008197	22	1.22632417324278	0.024158455337326	0.0123129273235821	0.0769485913056535	0.854464661974422	0.0370401793446661	1.23454104931275	0.782974649557255	1.36441554930994	0.915068539497015	0.50691893842217	0.202666465480725	0.437985139032572	0.0950661014093364	0.0355855066335099	0.0684673100995768	0.545922045921107	1.90313586956933	0.784259577116288
2008197	23	0.569698232415759	0.0270866214301408	0.0116451996677518	0.0698184901185375	0.563650542887765	0.0320226753294882	0.836440834491041	0.776682609388061	1.33943355825006	0.945666177461986	0.440926289459354	0.213072390542184	0.458746914033685	0.0780165296688661	0.0361075098832141	0.0645430120869646	0.647717196354054	1.94524942041897	0.517459403087581
2008198	0	0.765224062828094	0.0423325558711502	0.0112125202491248	0.0470891544688433	0.486829002224569	0.0349029326009702	0.6278345777954	0.755671469757182	1.32020239141558	1.11895319171521	0.496588036794024	0.221718337357677	0.453919376789614	0.0533285510461035	0.0610628020942019	0.060925386543	0.56699532557501	2.1416607355871	0.4132642261471
2008198	1	1.20176882457514	0.06326566255285	0.0109359721871455	0.0350600457028471	0.519378774104839	0.0452097934606476	0.703508681602326	0.8119671413771	1.23323900825974	1.24086406380221	0.718651849288998	0.231634059444982	0.465303847836278	0.0552741146414513	0.105391209453894	0.0579595245563343	0.495827676192378	2.49330923747741	0.397601185289866
2008198	2	1.52963014419277	0.0742066755767971	0.0107496991333838	0.0376478139528777	0.537146596050315	0.0431939703433917	0.810811936309089	0.810120679313412	1.39517313862668	1.74255111188747	0.812584313757834	0.232140597514189	0.596644657581595	0.0681781423668499	0.126422948558981	0.0542066774918931	0.631752928988334	2.52782657501984	0.293013139122726
2008198	3	1.90286058968961	0.0723646988592087	0.0106296921012642	0.0440790764536139	0.515847784114952	0.0375280583316441	0.874085286414439	0.53938164525098	1.60489730559257	3.09218888562396	0.830755280174896	0.22915655863353	0.457532885607579	0.0791703945107763	0.131698029938273	0.0507897864444043	0.722549992835746	2.4397776633931	0.185664456785429
2008198	4	2.56549977926737	0.0718124733082515	0.0105316855906811	0.0523790502178692	0.493712112330741	0.0239531327855526	1.52206138631217	0.354410057242913	1.47369994935861	3.27602308635214	0.806603526621773	0.250180125404357	0.27084211251477	0.0990029803797847	0.123623285277828	0.0470632879949349	0.679228795616782	2.10276291851372	0.122839832634462
2008198	5	3.09705861635866	0.0705528732050234	0.0103918329715655	0.0619549469022834	0.467602517889239	0.0148431086146516	2.43289520815063	0.601651768448287	1.18680599464864	2.82688424370488	0.742759236171132	0.309851633549936	0.302438685086537	0.164645473670761	0.133969730056886	0.0467897513936102	0.560960258669495	1.50469394240149	0.0518090366974905
2008198	6	3.06592440208276	0.101379552269468	0.0101480502251473	0.0717818822811723	0.293249719556057	0.00366039319928956	2.24117386435352	1.24453785192309	1.03001349643962	2.96303402907192	0.724129014532938	0.3376259024409	0.6410740102373	0.0560571574756908	0.163757878931517	0.0450632486302834	0.340973703114927	1.27636644363968	0.257775903541636
2008198	7	3.03604179100934	0.10672182252298	0.0132168946253858	0.0797461821827118	0.0743276635439758	0.00430624855407157	1.89132885793364	1.46433931201951	1.20340313826976	3.87752965523791	0.749397100157317	0.336488137758366	0.841645757505735	0.0297328111390566	0.220397189774581	0.0438990906824434	0.384227054538436	1.07593430609534	0.935998590478835
2008198	8	3.51958108430396	0.0928309606787349	0.0162450017063525	0.0777448629331	0.0617715315973203	0.028333424282241	2.15052126795598	1.63617149367033	1.90359429112079	3.79496679950154	0.687046159407587	0.322835934765689	0.934058994959652	0.0482958520605198	0.243600345645895	0.0440522902593759	0.412846825468244	1.78711892834537	1.11903662502104
2008198	9	4.44924587795018	0.0654100272315054	0.0208921200884205	0.0807867672263226	0.792463324535775	0.042913796137179	2.49523069021974	1.65549047470559	2.03980969293827	2.3819180558613	0.578730282785817	0.301964995708743	1.18128670632288	0.145199417364274	0.201994021741438	0.0495273053076741	0.416728867371085	2.45933902558548	0.873713844419241
2008198	10	4.99794528115851	0.0344545528367667	0.0213656186284427	0.0824810713221961	1.21549746864708	0.048620315872096	2.2885364508891	1.65987117279117	2.00999039609456	2.38010179145408	0.516779809966603	0.287413564272166	1.12779557489998	0.339639155352159	0.163114585851804	0.0319275859173513	0.396198652688155	2.56378077256157	0.678545465963588
2008198	11	5.26263309082727	0.0126057641817704	0.0187750673817752	0.0591526917660931	1.17118287498452	0.0444615228727262	1.53155515470388	1.72681383399039	2.23828428486252	2.08783258478544	0.485798536065935	0.270588991454723	0.951836292789594	0.425306268560634	0.131031437078326	0.0259366480784842	0.333346848049729	2.55708646441051	0.657874285928091
2008198	12	5.48167945079078	0.0504017182209302	0.0173966541704045	0.0188156122225642	1.20003192562662	0.0450195758431299	1.13484399035932	1.93241445378012	2.26016798347333	2.5636434088257	0.457579518961871	0.242800528296343	0.697883910184715	0.362707864129407	0.0993916521657907	0.0198635350311141	0.235927278373617	2.35659537013046	0.736414758690434
2008198	13	5.09555659107032	0.288835746601919	0.0178124414888645	0.00913024341097038	1.29986904876105	0.0402897270205001	1.07549798783497	2.309472071878	1.90248873584163	3.74954730143719	0.448510465796531	0.198908821325605	0.583267281955147	0.282165100166793	0.0778812760605622	0.016172798021679	0.145496815232801	1.86286217905914	0.803673333679615
2008198	14	3.48636903609423	0.29159222727483	0.0195316077682372	0.0451213078481243	1.43474850297175	0.0259475026293378	1.98808727279864	2.89516107653875	1.30007525672641	3.76398292572583	0.44507347198361	0.189899614130208	0.743357414678416	0.223140017413468	0.0610501239684304	0.0144010875239751	0.102489657541228	2.3682939657594	0.851372308546394
2008198	15	2.1425997673134	0.245484468119894	0.021102410106573	0.126039482714806	1.53045368007959	0.0192601835511663	2.56631631571909	3.36807394344121	1.15671173339277	3.30449531433701	0.431447673425565	0.223782242973991	0.412017419242497	0.153586075761244	0.0517478119180649	0.0138498331880834	0.100492555928452	3.69037351981784	0.83346655270986
2008198	16	1.87261007583047	0.242767591124411	0.0221538159110593	0.223257424087309	1.64980182265426	0.0227511950626062	2.6099333061616	3.58248767669327	2.41903820291074	2.74054128344982	0.404398304408738	0.303960188671684	0.18291174148217	0.0974902651700071	0.0472474506595348	0.0137554817269773	0.26706178594678	3.70854062969745	0.761762967762834
2008198	17	1.71375711460895	0.26534754979007	0.0222807037759891	0.298543554384341	2.02139277056697	0.0212271024542921	2.33153755523088	3.45803786809633	3.03627203325192	2.83522845260009	0.391134155381251	0.387309701280318	0.144770425909967	0.0609477782140078	0.0422555454743452	0.0143170365633436	0.871518798568613	3.19722241844223	0.717631740207438
2008198	18	2.01731913515186	0.268746770933497	0.0210862333059177	0.319482737843428	2.68315790676413	0.02052806656775	1.97726991726383	2.97836411878573	2.76086047350403	3.38898567900997	0.418039848383798	0.410503451594945	0.303197286558223	0.0339688898045322	0.0339146095537316	0.0165253137252658	1.10751621374101	2.89308267651964	0.682259424496257
2008198	19	2.61333990211964	0.238352759289855	0.0188973721885397	0.295254101080022	3.10212025322585	0.03234894456402	1.8765727675928	2.04483976098077	2.2233030470911	3.58240920433153	0.481732612470978	0.394360399596005	0.375955947046868	0.0222408031023881	0.022384625254173	0.0178220770352208	1.05420982965213	3.40547595153758	0.70691591948404
2008198	20	2.60182756226765	0.223235408914489	0.0158018404939251	0.284071058452817	3.17568191420075	0.0697453932717069	2.03441380205297	1.44884303615405	2.20063109255195	3.68982258156046	0.537505631532079	0.357137720261982	0.351621546782402	0.026125743523621	0.0134816419974659	0.0163021598518054	0.999686573844302	3.57635663940163	0.74299144722159
2008198	21	2.31952969950048	0.283541484174747	0.0132855327806633	0.288966948580409	3.02955631633829	0.0988158867820632	2.10573746649207	1.27949215394994	2.67262390958598	3.78062881989558	0.545177701432639	0.320079547917738	0.330284768620123	0.0205198792318576	0.0105999526656807	0.0149428285581615	0.977653499486974	3.09108481054792	0.675439711393656
2008198	22	1.96993312235582	0.432741667470177	0.0114987377007838	0.302540383920762	2.64074473180094	0.106782705972283	2.20474026370161	1.41096945079458	3.04438441474257	3.58270342244622	0.510118339676204	0.276810650533737	0.341767907823359	0.0200875836385615	0.00897258428890578	0.0140452311876398	1.06490973696126	2.92439628573971	0.568948926909312
2008198	23	1.78899465290653	0.507289483061733	0.010277593164661	0.382768814207197	1.80944761981704	0.0954366911456951	2.22311875000098	1.80494761037478	3.21698316477989	3.3444242092254	0.45216783714828	0.261246945077356	0.363412673071778	0.0201693950662631	0.00741012067126624	0.0134440881564804	1.33777867027656	2.93932017622092	0.47723461089942
2008199	0	1.75827637241934	0.523683556709863	0.00961833315783799	0.545336827415395	1.2626405378635	0.0878677893039394	2.04486566242441	1.83844549365344	3.22374855895245	3.22072657238777	0.400376930619029	0.261833940264394	0.447139262190238	0.0251338183525501	0.0055046698427616	0.0145191405662796	1.75226479015755	2.751055391283	0.415945619573034
2008199	1	2.09107875297328	0.613014219855392	0.0120873353595304	0.687450427000406	1.12437942908542	0.0889363056387317	1.92183213135348	1.69551710445347	2.64625094485	3.0562746138507	0.355312633311708	0.227666120935077	0.533105290067404	0.0294850163950555	0.00419558143919485	0.0152581831640046	1.9252315989758	2.73421774895808	0.367859983187304
2008199	2	2.63429999833832	0.702194763931796	0.0130115979668096	0.733588690044009	1.23279653115567	0.102942127159366	2.01298198550177	1.54121022596523	2.12450177428366	2.84661645341471	0.311984559001066	0.204716515231871	0.502557537252472	0.032899811696018	0.00795538489281996	0.0183959605330635	1.82350652580226	2.98548036459605	0.341339697983272
2008199	3	2.76630457980489	0.705529760623622	0.0143549973697548	0.714865194463505	1.43959002758618	0.123433080881083	2.0289059107249	1.54860716179833	1.68580081860647	2.52685856646415	0.272907492886666	0.200626150608525	0.44891074735298	0.038478481334739	0.0144792466636021	0.0151679454443393	1.65231908748738	3.13776346776747	0.363486541942754
2008199	4	2.73937742176141	0.261018366294532	0.0163038173673299	0.824548150745169	1.47734709648344	0.14966931870633	1.77784932862762	1.69491828105633	1.60474532719578	2.29644023098135	0.245045506526886	0.196137160101895	0.3886548179468	0.0644646399552642	0.0200787962746138	0.00499955961668924	1.28106782522202	3.14962525966244	0.459118474249722
2008199	5	2.51920593315778	0.183757404450441	0.0204801058481528	0.849531860454551	1.41721317550043	0.207356048293829	1.64600129120739	1.78146755657245	1.62037582885217	2.2163751788287	0.221510809968028	0.182373531749554	0.383972081833354	0.118257028945114	0.0202651287124394	0.00134536770187181	0.949032058472737	3.05552385138357	0.573637770299604
2008199	6	2.0916858493746	0.203953906748156	0.0241687516273857	0.797385406081669	1.32730211059455	0.309584096942694	1.5948527672031	1.69883793693427	1.56996260392403	2.14837245195725	0.197817513410011	0.171270090699163	0.475242096401862	0.173966535181173	0.0191151274302424	0.00903765863067147	0.84616469062142	3.08542065222862	0.625684207859761
2008199	7	1.76170636297082	0.59846810017895	0.0272397667624832	0.737096899532651	1.26874376199496	0.313771124650775	1.53887570347316	1.62051752965831	1.45985039109303	1.98877032505096	0.179797528223934	0.169306697972495	0.517009548451827	0.163143457395124	0.0179264229331529	0.0237230144474496	0.971351987392223	3.0616962367629	0.623952365784817
2008199	8	1.62060207129603	0.734351750283786	0.0276450490125889	0.717741272470327	1.24887192044418	0.28590669746208	1.33217086791056	1.57425096699819	1.35939673706661	1.92139769277659	0.227676829276603	0.163373488077296	0.465724270804282	0.170891976421111	0.0161865457572304	0.0312596407058696	1.07871466015162	2.99586416079774	0.595310206241912
2008199	9	1.53310208389861	0.581152020745433	0.0258492815958497	0.624914445550378	1.22560264756292	0.236674123021454	1.25407774086178	1.53717587899986	1.29394629633758	1.74902551704066	0.374007687186223	0.152430554485626	0.380900020753123	0.19915408666367	0.0147812340101847	0.0301285558051864	1.08593370943667	2.71047764645681	0.530719848535556
2008199	10	1.44363223996975	0.418613220261737	0.0245273576478918	0.471884070222177	1.1598802969181	0.211396668371707	1.07241796127674	1.45261982810189	1.25359995891396	1.57557299922673	0.415214469342023	0.146237029909951	0.32828382908358	0.221282163337398	0.0134554979228808	0.0263231785644065	1.05736171741082	2.42095963953581	0.458195800316069
2008199	11	1.31450217384874	0.299549064504694	0.0229464245548928	0.390583420587636	1.05841424080407	0.225457097156198	0.891977459085676	1.2883520772301	1.16425478563942	1.34396286705009	0.407908183806638	0.143383067380676	0.311208961358828	0.19477028351733	0.0148311227300283	0.0227950087764752	1.03507378758178	2.17608494024802	0.440365020979268
2008199	12	1.27693167198253	0.212221529734101	0.0219606302861045	0.3258412379801	0.963021551173175	0.223313205612955	0.816013148970064	1.09711720399186	1.04733915662669	1.06449102138308	0.380485175925922	0.148037550381513	0.275967202650955	0.190829196831005	0.0223975400989902	0.0208500957164276	1.00512164324534	1.95211970030331	0.469981720774942
2008199	13	1.25615813386537	0.146164863343643	0.0206925715400369	0.23976558263764	0.879745871735072	0.203996460488632	0.744687912685966	0.886976295690929	0.937374254596572	0.924165154655634	0.355242991397877	0.158293867980673	0.266238966637007	0.186304543942339	0.0321573585871695	0.0190810028059196	0.972917733557297	1.71996158038745	0.449202684729108
2008199	14	1.21522227171648	0.0832770788288271	0.0244600540708314	0.187796252689847	0.803273048617743	0.173290214208781	0.603349746529581	0.747711411310593	0.835242687602408	0.804026454161633	0.364238468461996	0.16734002446219	0.27353021933026	0.15590048054095	0.037088390220672	0.0182530905768539	0.929673501450635	1.5087727541458	0.391804871162947
2008199	15	1.00373204500686	0.0551711003644381	0.0270158668793537	0.17191210065141	0.727201190052423	0.140136022446382	0.457104823853607	0.669981468547028	0.76243151548847	0.663590289965643	0.409069260595314	0.169138677402836	0.258950484639589	0.125334525138425	0.0392952086075131	0.0190621385855631	0.875287616354404	1.3266803909173	0.417697149466386
2008199	16	0.638050899988316	0.0489001026818275	0.0234433729351312	0.139336260868121	0.63529821253408	0.110100875039827	0.354319484556224	0.598676154633919	0.727734648805105	0.559920451504889	0.520285797308368	0.16423687163458	0.251054093952393	0.100989579600875	0.0411773971166966	0.0200510389836929	0.806739592839392	1.15284410335483	0.461795710065322
2008199	17	0.388531082078685	0.0758572282172567	0.0196193935227231	0.0860050308102096	0.526507073421554	0.0912423903520623	0.26845012277873	0.479615008290325	0.725680972874132	0.491219229339691	0.563507804415241	0.148936112022919	0.216476354614589	0.0813347662803187	0.0432359696240429	0.0210958239402635	0.720222679473031	1.00088443157076	0.326928831856821
2008199	18	0.337988511217296	0.0836327952667239	0.0163551683004327	0.0622079288716241	0.410291521052897	0.0700314581705417	0.238453636912254	0.297795337380563	0.714632221936105	0.48757658332511	0.459854741075394	0.120566055797257	0.189256587193545	0.0681679741355985	0.0422058810055564	0.0212103898246443	0.62846699738871	0.919846668112263	0.178846737427941
2008199	19	0.457611857101779	0.0717815965293621	0.014722730774132	0.0580311623147371	0.312185588692202	0.0559486274843971	0.223929469457803	0.204607986910023	0.649208332061621	0.507073577508448	0.425059859218312	0.103691391579864	0.153752561605231	0.05730133113243	0.0391704202133118	0.0208984460553158	0.510809642522211	0.890906895711741	0.125718586358711
2008199	20	1.06910567527794	0.0574012885089988	0.0135660132181132	0.0512757212957418	0.242177213703289	0.0476316561890107	0.202129646612158	0.21676169476575	0.577373118533539	0.546049966321833	0.36692768339214	0.103571794501418	0.126835791855745	0.0607631179511294	0.0366713278954775	0.0210225995992085	0.3802351348703	0.903070431991402	0.143439037231772
2008199	21	1.46572194885445	0.0420449582735776	0.0130764584554722	0.0398655870700967	0.196743690269824	0.0448722620584331	0.201026801851187	0.279782728150046	0.520154974987692	0.591865228820629	0.298331471233611	0.12096960419009	0.109715093860753	0.0855598292535478	0.0344192282041234	0.0211027947365281	0.272972024924846	0.900572370865442	0.115809928960611
2008199	22	1.59281598955288	0.0414863275280731	0.0127163281631514	0.0374679639047821	0.164970569375231	0.0418968870815406	0.201404672920121	0.419645838847587	0.50409515540321	0.552137157006593	0.266967634724366	0.139647789905999	0.0993290678725265	0.125341392402876	0.0328085457646528	0.0209338399726029	0.213731654288721	0.822551287258869	0.132368285611586
2008199	23	1.5997312167757	0.065289657203849	0.0124258098546371	0.0405747301181268	0.14401669660136	0.036649431853627	0.334048812551123	0.704829870266708	0.554275170555953	0.52204017343364	0.259508586081791	0.231389327394817	0.0976896397881532	0.150654169148497	0.0314842206427076	0.0203652552842476	0.209735552063074	0.570856604883366	0.163083787115361
2008200	0	1.47179595370312	0.0767768918067232	0.012181545598639	0.0428439460361881	0.139025479812926	0.0330964223768186	0.418119173716045	1.03748070337152	0.66328219941252	0.407964785043471	0.276512874375745	0.289951696180595	0.108141380947247	0.158912618816813	0.0301570231564869	0.0196118915929961	0.20661755250618	0.334889484049516	0.19625492561175
2008200	1	1.55270711680524	0.0787620915013474	0.0119976801654156	0.0426988049746534	0.162007764352198	0.0313496069718	0.365514939200128	1.11381081717416	0.748077691247881	0.300968757510419	0.27303373182148	0.239582827388833	0.113496636586402	0.150567604133638	0.0285534565514742	0.018691411212848	0.208107038001184	0.272217442609777	0.325808053615586
2008200	2	1.33591652191885	0.0759983259971673	0.013163206949687	0.0390995152675806	0.261824772237809	0.0301956042732879	0.300688826265795	1.0019853651112	0.749701493806807	0.31991353307314	0.266308599725136	0.220359945991464	0.132177870562841	0.175308089906291	0.026843507033261	0.0163741059799305	0.22401410117094	0.255102742997999	0.415916492704313
2008200	3	1.44128573068082	0.0707803602854113	0.0292731491195598	0.0342303616201917	0.381297151817359	0.0297945104867749	0.244942227998073	0.704839614977571	0.637007441498122	0.374431258877468	0.277590150507365	0.29498393946578	0.180943011583232	0.158691758230713	0.026417412802264	0.0175493861089135	0.236325469886577	0.27466424540938	0.448846747135427
2008200	4	1.12374218702969	0.0675799512323716	0.0368214797580221	0.0284002997087523	0.378755784162437	0.0302976552415603	0.221432922276213	0.522702194703164	0.480173393539667	0.405995831276333	0.318178368538598	0.365017579313055	0.245550046675189	0.177773065065694	0.0248202267589616	0.0209177751511332	0.178912103824329	0.305241292065772	0.427060801690445
2008200	5	0.903067979306451	0.0614598837303893	0.0398038725013101	0.050758239240357	0.324327814919906	0.0313822270985232	0.239446483745421	0.541112329537636	0.417089327715108	0.34288921357272	0.358560787125475	0.403603212879822	0.390933598310542	0.189848626019038	0.0248007260718556	0.0247640842985961	0.148172724705165	0.322511321730032	0.401603956317191
2008200	6	0.748404132460898	0.0382246117957146	0.0404292775163378	0.0684308007542763	0.292360857439199	0.0343361432453428	0.255531105670316	0.603964519421322	0.418105863075573	0.291577157983418	0.374942384851238	0.421234740574757	0.574483160111415	0.131862100748217	0.0282036507194476	0.0276593845778422	0.133071897202925	0.340213478781244	0.389985906629719
2008200	7	0.625842098876645	0.0164724648995237	0.0377809283284517	0.0583474075786209	0.26629106573414	0.0777833147743508	0.129003934537433	0.581519744416316	0.457141158521793	0.28206726781097	0.364636458978329	0.40711164091627	0.618615291222977	0.107336273342978	0.0328001966271001	0.0341497202605003	0.120247330698187	0.42533435026305	0.376068103556899
2008200	8	0.503257228517903	0.0166905470097975	0.0361020130654682	0.0690181457687451	0.253185682947835	0.104395491213932	0.0897351407183459	0.454837469057991	0.662812141650832	0.301831215169111	0.336940085539409	0.448948188008947	0.576886268858471	0.13760932575028	0.0364701756066132	0.0380006962111018	0.109690684188671	0.468434313604545	0.354529117239314
2008200	9	0.38673741504501	0.0124329341460986	0.0378027531815546	0.0904857858047926	0.249994660690247	0.0771881579369456	0.0903969339540661	0.395553043928846	0.981357455748267	0.293763636140324	0.304618887375324	0.497169653818247	0.467467871541432	0.147997189939075	0.0355575597201245	0.0338652505063214	0.105330730212637	0.487823230261366	0.343672547999513
2008200	10	0.319771338780742	0.00763634522185933	0.0418854808562879	0.110154650620786	0.258394345988028	0.0515651213569977	0.0954349262528891	0.36221189675375	0.891153344975129	0.281722270335939	0.29113359684951	0.507983940977382	0.330411319328077	0.1350041306408	0.032435179574493	0.0267997576090514	0.101258382187795	0.483777145359577	0.331124962438918
2008200	11	0.293218617544664	0.00892157065534772	0.0389393023159064	0.107011978584435	0.256194298323284	0.0418522070862055	0.0906863111087311	0.324111890057635	0.545138336212942	0.306060309252496	0.283648581287823	0.476668640413325	0.260285438539951	0.108543164580048	0.0306075776215765	0.01926357469284	0.0915890116460508	0.443958331023465	0.34271392890403
2008200	12	0.285307795910758	0.0101709245328088	0.0373044227119295	0.0788504573859826	0.248161860958341	0.0397754267256957	0.0900378565001915	0.288971910578788	0.486273598449536	0.347729945913094	0.283797374131878	0.4288120998546	0.227172669772067	0.106732508580726	0.0299597162538784	0.022387856409537	0.0785759382680505	0.445351862253894	0.353468162677263
2008200	13	0.289868764108074	0.0118213754550764	0.0382488777352432	0.0408120673080904	0.230276115651142	0.03752998848742	0.104722432379969	0.267874419252473	0.490327039920478	0.385056424352651	0.286321142925267	0.403033625517105	0.223410819227085	0.121800228239202	0.0299784285115856	0.024852357766664	0.0688751110954257	0.431789945964568	0.276131961315601
2008200	14	0.304889850577136	0.0169751527144752	0.0383697813626009	0.021292770434972	0.20173740535077	0.032465099633686	0.144058422509995	0.270726684212956	0.451345464978443	0.45642641345688	0.298786223633082	0.378076873477742	0.230655542146051	0.138014648958362	0.0300093719133074	0.0255736363771836	0.0642013682734932	0.406851808860783	0.231884692402842
2008200	15	0.31160370284152	0.0325033213586015	0.0439224099597064	0.0150866897037315	0.172951183651664	0.0210182150497654	0.19277637384613	0.267420242836797	0.389109499574504	0.619210740594674	0.318240558771181	0.347659550102006	0.230956409687181	0.157949613605539	0.0295468313161077	0.0239931305429101	0.0600185994792246	0.390974158182251	0.249348224132741
2008200	16	0.30102889501586	0.0551862427781201	0.0478403411246382	0.0110740154296193	0.143788396191553	0.0151141919855567	0.24360279475892	0.265683111971333	0.318609317815879	0.759353985674347	0.341782649552144	0.303782508508972	0.221663850471322	0.173912629083373	0.0287814934861757	0.0237374613412485	0.0574686145295884	0.416721881895943	0.317516887909902
2008200	17	0.289325489544063	0.0587043728122075	0.0383633522531093	0.00852764683037819	0.118465513133757	0.0135663528744939	0.31958182900877	0.306768139117539	0.270770097841078	0.808589454900367	0.411478453065094	0.258854040899468	0.184259129015402	0.188483554569512	0.0279579956295399	0.0244013802903524	0.0564240920319497	0.445057072591972	0.353383499036906
2008200	18	0.27992852162434	0.0551456537216816	0.0291198809284552	0.00964711721380639	0.105577640567803	0.011957656075347	0.433313594325635	0.378153881457317	0.244054655608325	0.849347714870355	0.586942731885948	0.221324330800379	0.15006377372083	0.198974265691263	0.0273996875339127	0.0240928560372332	0.0583887914711033	0.455001941547891	0.320331297188953
2008200	19	0.276100513307036	0.0573761478399846	0.0226631013730932	0.0110288783202743	0.105198562065409	0.0104522409883057	0.604220118451105	0.437148552564264	0.235041931576184	0.901635855827771	0.690104607975374	0.217184595569034	0.125988660943693	0.201463068235978	0.0270583568649573	0.0220576098619468	0.0659164555939296	0.467914779050417	0.297832857355586
2008200	20	0.272961033762601	0.0666665548633504	0.0192141189537456	0.0117865990661529	0.11152405143034	0.0161597083384163	0.753384289662779	0.489236986780156	0.247719746709478	1.75345502473517	0.653556593387561	0.206642152248456	0.146888862412471	0.195672243155888	0.0267086737849585	0.0192022883385845	0.0651659925353515	0.48796824600037	0.297279245386992
2008200	21	0.267446289272167	0.0836977858805025	0.0179110076092484	0.0128972164979661	0.118787947273382	0.0228962658866224	0.924496280044866	0.538816594676539	0.265695281774513	3.07612516454248	0.555860928693572	0.200831954150082	0.176996214881901	0.186791107168337	0.0262780882549002	0.0150271832551072	0.0530941908192143	0.502371145697699	0.272609242170252
2008200	22	0.283515241345303	0.0827713708248233	0.0174351646372673	0.0165710921710279	0.133711428704732	0.0263762675160532	1.04712608308692	0.597001930934072	0.282483211921733	3.6652321189667	0.538602782508403	0.212550883507915	0.166077085704495	0.178365226881142	0.0247648326109457	0.0146106751179724	0.0460531022413901	0.519185152601052	0.241216805594314
2008200	23	0.35016444543651	0.079143988864765	0.0188894018227385	0.0235886025328369	0.156996265856941	0.0301213965539688	1.11060539645388	0.659634764635708	0.303003596107859	3.73490110558414	0.51343100604445	0.22563258305201	0.169444663169847	0.170232841238173	0.0166623957894716	0.0338292873944108	0.0487665735012988	0.540872168593498	0.229039527152914
2008201	0	0.491599794940375	0.0833948545471267	0.0190928339167576	0.0313477316437115	0.1818100032677	0.0631084229089351	1.1388413411395	0.729809903951113	0.325142626769218	3.43701146434319	0.418332458859179	0.242108954495506	0.193168158282409	0.163246566704947	0.0107223778271453	0.0614126564319699	0.0509163357202417	0.568209978683339	0.215721738204764
2008201	1	0.674042620474531	0.0892098403315002	0.0188472235994737	0.0407540176887885	0.19814052327932	0.0696443990377411	1.06845839025381	0.750844567107481	0.349799772599938	2.94056263941494	0.400158774207332	0.265832386429617	0.289773855763059	0.156880701052968	0.00925364126397871	0.0537401879986835	0.0502597373724131	0.612357778576851	0.245098076593831
2008201	2	0.753562356692064	0.0892753952396071	0.0188489053444903	0.0529734501895211	0.177186003910117	0.0527044866261585	0.859668393349237	0.678748573034561	0.378568303211559	1.73164485520495	0.361306286253241	0.28465243937038	0.408183071025718	0.148800369572159	0.00889148547116531	0.0329964263545286	0.0509834941051155	0.658621395327931	0.290617680921446
2008201	3	0.70088880903913	0.0613211731638214	0.0189190098232181	0.0535261681458606	0.149947280418331	0.0425476953387518	0.57501570977251	0.563929897677302	0.411246998665568	1.60907774797568	0.328039671864764	0.294167242614831	0.443827912758865	0.13925219552392	0.0134726153069995	0.0266135458940506	0.0517961190733166	0.72108236203744	0.309201100679309
2008201	4	0.510654317090314	0.0503412324256308	0.0181592603503401	0.0510967811073131	0.139186899300199	0.0338464866693349	0.413640939950433	0.433897027076913	0.441065578172872	1.4417142789457	0.284605662262757	0.300579218841528	0.445104051260774	0.139889524424808	0.0185436158865694	0.0294255127370394	0.0529321509504207	0.810626971940208	0.312782647210731
2008201	5	0.40156464932846	0.0441317430598508	0.0177254295086339	0.0546562554040225	0.13447617513331	0.0280783922678252	0.438042546412278	0.361506144229576	0.463161113981339	0.757917427869763	0.246506722487372	0.293035432885602	0.47335396235378	0.17401059017808	0.0201456058591908	0.0303687610667884	0.0557737260337952	0.913194640110939	0.319032414113497
2008201	6	0.28089507749018	0.0374709663345655	0.0622862560367515	0.0676040823249343	0.125286518997794	0.0220486380627237	0.35989095516324	0.38005523324941	0.483410516718366	0.489855029668353	0.229370951366835	0.254500597231362	0.616002122540118	0.304184092628315	0.019161863008618	0.0305975992510775	0.0619108593053899	1.05987585338492	0.351698800941889
2008201	7	0.408227293435371	0.0336015861251218	0.124551128199185	0.0795153807727647	0.136773831372791	0.0317980127919314	0.272388131299305	0.382737721794972	0.515076733745728	0.341986406709081	0.229721117020784	0.198139915549723	0.786696314087706	0.578678519772208	0.0166457815410664	0.0333794645476588	0.0704026169439397	1.10143099031751	0.446625213987343
2008201	8	0.75609431057587	0.0310455209272492	0.121171611264273	0.0924756490942407	0.16169565003045	0.0418695881189325	0.238562642496124	0.39063544144036	0.556354295262041	0.293879859220485	0.216320039286923	0.151408133326694	0.563092914169702	0.445963284833615	0.0135680577992609	0.0260861625701718	0.0761346268707588	1.00547178496179	0.559848586028616
2008201	9	1.00801320611566	0.0599041529424985	0.101814672625564	0.0871676771342713	0.185656222541065	0.0438139335964411	0.25513943021116	0.300108266983209	0.594730000794182	0.13792335293373	0.193175553863045	0.127206401182826	0.434915904711755	0.23309850580616	0.0116102585292521	0.0197551360886128	0.0711286767201282	0.829407821732064	0.649322099616297
2008201	10	1.21281655636168	0.062047585529395	0.08471683397486	0.0682900693163155	0.190234622919211	0.0394660235778101	0.220286647311916	0.201952774295149	0.616279774052929	0.0468008400824942	0.172239321280449	0.112586885739521	0.334629455200699	0.156844780597465	0.0103113343621136	0.0197238696555512	0.0600347443382368	0.70022588954202	0.680563427275474
2008201	11	1.40181883725303	0.0779507578803554	0.0701914466892581	0.0360891689959731	0.15896347384549	0.0388900380691443	0.127840981225155	0.17995902790071	0.59550954931861	0.105309005821876	0.158837695715412	0.103600995430715	0.328323891720478	0.109729455560624	0.00910919440026765	0.0218131469295783	0.0497617636634919	0.630606657259409	0.807033621999844
2008201	12	1.23007767289389	0.0633159685566747	0.0601038761599538	0.0264379677025021	0.122146696788427	0.043553674262981	0.0559202774025549	0.260342776434372	0.532637767883585	0.292179285942573	0.151836726359786	0.106159381763003	0.362101650770071	0.0790666336961284	0.00894944947753732	0.0222333697360064	0.0422025785075772	0.621149193937213	0.912181853215886
2008201	13	1.22239854208049	0.0410656064097125	0.052033826326864	0.0319234581579435	0.0821722174897571	0.0509797083284841	0.0585425499058092	0.279896542237017	0.459371343842622	0.478906918879213	0.146808018083562	0.09793703131523	0.361251861414186	0.0644773558361632	0.00874262046971957	0.0252399136340932	0.0354517718509222	0.591047006019462	0.820482705867817
2008201	14	1.49514776080179	0.0912132341960657	0.0406587534830629	0.0395562214157167	0.0791325566321359	0.0374157046952682	0.0693935976732602	0.245175453104161	0.392085111108605	0.51572205179034	0.140709761783078	0.0813288404262491	0.365809219324559	0.0578859404331426	0.00847954303072339	0.0378655813660081	0.0285817209567423	0.546438850401313	0.782303055081376
2008201	15	1.55863196607497	0.167791200370914	0.0373436628775387	0.0418431450990621	0.0976117782193006	0.0198341153611184	0.069279339457978	0.263078697014426	0.401264388233081	0.544538670600586	0.139532709628836	0.0633067225919973	0.409075329520236	0.0776552170536673	0.00982916531609021	0.0491512292766409	0.021131373753379	0.4611892299845	0.919147172262079
2008201	16	1.7104376760227	0.259911579036015	0.0420088737717675	0.0345952380730112	0.0895713354581172	0.0441212950893433	0.07445150317684	0.305103251806741	0.442071315504614	0.512063100888535	0.14285967745801	0.0524063920599721	0.525630899600692	0.107872936707356	0.0109088023261357	0.0447249680714883	0.0206542969651018	0.43756597166162	1.06775493526293
2008201	17	1.85623103784726	0.297872491960128	0.0479037848060211	0.0555553819718078	0.0840459292714064	0.0761207442640082	0.086341918494424	0.517435596888118	0.442898069950614	0.464451444887318	0.146984855193269	0.0480766033903904	0.615028483169061	0.111632002792026	0.0106785095358672	0.0358427860214156	0.0200535069844151	0.477914212977034	1.07635112567268
2008201	18	1.84941192868031	0.280794145721521	0.0465520690965252	0.124294305198049	0.157189378282355	0.0619237712807985	0.110369238402275	0.796293643139855	0.449067960396487	0.439205379856513	0.163713129297586	0.0465127154216532	0.594429519783427	0.0983941774899531	0.0108002057780731	0.0305314963890339	0.0214110586937253	0.512623533619363	1.28606967046193
2008201	19	1.72378127933493	0.256169993005396	0.0423958002857774	0.181047485334555	0.266399473713053	0.0505969376560572	0.099690347961684	0.662061878074132	0.466106019887486	0.48146282939775	0.18647203084296	0.0465454582731704	0.410026741010401	0.0435301435712022	0.0124144141027166	0.025508409738531	0.0269124479373319	0.515029291831233	1.43994104722801
2008201	20	2.26180061555786	0.213854771759142	0.036702335362857	0.185424982792705	0.280265435372543	0.0403296590802269	0.156616444747157	0.666824676569266	0.441657470071776	0.51049584784006	0.204141789336278	0.0474127858395779	0.386837476207744	0.0128696006820717	0.0118687648529495	0.0242957338260819	0.0373646761711608	0.464809521974685	1.35926173418144
2008201	21	3.06161043437479	0.164279175983214	0.030299565047559	0.187720847062426	0.345949305200659	0.0311400448507869	0.235304860316249	0.620163794999484	0.447186591319218	0.820625805230261	0.212170139867943	0.0489638640404925	0.338596545815133	0.0155034410950483	0.0123429125015092	0.0244029510436898	0.0489391331856093	0.383506688907594	1.08091815333221
2008201	22	3.33010958704681	0.231361210341811	0.0247772841021765	0.1976232179885	0.442767830584635	0.026165083530485	0.380118472808403	0.565313459041894	0.513643355434069	1.20054154464067	0.223241508085576	0.0530266135791403	0.227372960371158	0.0226601873397077	0.0175179631564236	0.0249027789520509	0.0464408201921908	0.391737382192489	1.02884388284245
2008201	23	3.1877736280331	0.39879113453148	0.0238958713559893	0.15852973233067	0.401400456897269	0.0409206558479728	0.875154462782704	0.763570521936626	0.735251299782219	1.40768947213107	0.235891998538264	0.053012957257582	0.112646093300502	0.063994604260377	0.0213846250809363	0.0254600400048533	0.0263416661097431	0.378276612145484	1.16202024601094
2008202	0	2.46495150887514	0.402489324434358	0.023383232241816	0.1488989717063	0.411182336512686	0.0819303054466173	0.978455591475045	1.39636777690625	0.694764487272047	1.55057836587375	0.241289209091993	0.0517983251884536	0.121657231357739	0.0608828569978287	0.0198021028431547	0.023649870134853	0.0452570971893653	0.351181344254384	1.0750296124438
2008202	1	1.58985717723352	0.415896813527895	0.0248233500857838	0.216716501787131	0.438530077832284	0.164185645874272	1.08238326077998	1.52857244329238	0.744433664294862	1.78844004787491	0.236436776613162	0.0490767886275035	0.0599810106437643	0.0580969053515955	0.0163768831672327	0.0241894939907525	0.201941342053938	0.401163367307866	0.853411289661542
2008202	2	0.88576543387352	0.397568918618581	0.0268700741163258	0.298974600470969	0.547606792674363	0.222471076673521	1.36404396018174	1.14569550944525	1.00455819602086	1.87427301048915	0.240428775411693	0.0454814132453417	0.0726665009850846	0.0495571830316158	0.0137069770685917	0.0250007979614745	0.30230477556601	0.433385809796665	0.943194867816555
2008202	3	1.22396410890091	0.271117078253597	0.0273092344072031	0.253972927672776	0.728188849231319	0.196191936851838	1.40173302290586	1.31250205179444	1.17908205516049	1.71117541490151	0.278867790097612	0.0432588262307386	0.0809738894936711	0.0303784028659809	0.0108743345307899	0.0267887229652953	0.249928060930738	0.513645110841564	1.12938979866951
2008202	4	7.43520814317264	0.202998029972574	0.0269953830786028	0.294648686824525	0.6930844958097	0.153474595939123	1.17167263528554	1.83481306491105	1.35609342384025	1.42060293190281	0.311401531074801	0.0416612614942522	0.104970957009751	0.00979857689771053	0.0117403128770242	0.04737195317498	0.200257275013513	0.687545279342815	1.13899980928823
2008202	5	9.34061900511089	0.402138479064769	0.0268417293646692	0.278250826097149	0.645778919202306	0.141322101384022	0.940190604047649	1.77609727180467	1.78534044731018	1.11651132116476	0.294534505794694	0.0433903421715366	0.101235577845504	0.0101956121610739	0.0164510990477213	0.0555466151386079	0.236704584598664	0.949074314654055	1.11526757350975
2008202	6	8.48115414924004	0.576687204154067	0.0672565186066571	0.168682261779467	1.01223541777141	0.137261761591582	0.766206395557095	3.8450635705403	1.80453765405639	0.889044448590126	0.245326827904045	0.0336744249346556	0.111797233811708	0.0167643072409307	0.0204733722898219	0.0794823579334633	0.277636641569214	1.20158204694075	1.15682064135237
2008202	7	8.0816383611833	0.563334181445788	0.0972226704774418	0.0725444376146974	1.0245983592374	0.184195665586552	0.547008148757183	5.67835509760055	1.50744916431294	0.699928730681377	0.212969061239168	0.014242992051879	0.125278214870258	0.0174147887578165	0.022209130463234	0.139051476702444	0.368694804084054	1.5431077645925	1.25628332898548
2008202	8	7.86587106879581	0.536166817472029	0.0918791456035935	0.38572123546632	2.34380034395265	0.169385043461119	0.42221714655886	5.56199926568297	1.39448441209714	0.838205404741252	0.202058320417913	0.00468032985577277	0.187871626919624	0.0182067429774028	0.0235483399505524	0.126054516898329	0.408844474244309	1.70039723206472	1.27071448903753
2008202	9	7.94549871679016	0.443263170337312	0.0807261909633778	0.478815628937933	3.48434899401348	0.152631295636872	1.11211332400112	5.27900938046338	1.3561279151621	1.63459307357598	0.199892240074531	0.0011927782714681	0.384266485522875	0.0183253083516823	0.0256663194262762	0.111654983586733	0.401505111540746	1.57810427674275	1.20331629655011
2008202	10	7.67403833573754	0.353616498286693	0.075645503902032	0.433279977227805	3.04659059570885	0.136505007411717	2.71818498407344	5.73978598770709	1.00148213081665	2.28998460001601	0.204896240420503	0.000352117275306255	0.570364568457206	0.0213065301098423	0.0239648456319963	0.115514311240444	0.354143488103049	1.34832070129141	1.10237483477038
2008202	11	6.57546835364626	0.362204529069015	0.0963877223369222	0.366364874389515	2.87235587467087	0.10844957601272	3.03404478108441	6.20311596251223	1.13347490875832	2.35435787328591	0.230125615144186	0.000143645222693086	0.665328625972775	0.0282840119165318	0.0228686288869015	0.113168678964839	0.328163707404856	0.934862783198059	1.01193193468159
2008202	12	3.93244974941693	0.38288890852973	0.112933699622759	0.291907185937185	2.58607424231864	0.0838504262884484	2.92825371970212	5.89926298411126	3.20228079281032	1.68653011098985	0.27022662618732	0.000105542995370296	0.618677213691598	0.0344132831504691	0.0244876941493127	0.100822682338556	0.36270869892248	0.72235862664724	1.06198738928398
2008202	13	1.08176066369408	0.347763903715686	0.105650553015977	0.231691024772637	1.52533253910566	0.0686398168617629	2.76897400297393	5.36209881586705	4.55865580516704	0.94192051138922	0.319926170502043	6.30731241416632e-05	0.586184307520908	0.0329492266530494	0.0316140823704271	0.0931927376239897	0.516814232711132	0.840901305695095	1.14081119207987
2008202	14	0.832837935130293	0.301337374261673	0.105442637633239	0.220381013801797	1.04853087456106	0.0710019554009052	2.51621351637733	5.18859745715074	4.61462577361622	0.559998249805059	0.367528272691662	4.80312881851903e-05	0.616999197416812	0.028112886252917	0.043496651533333	0.0908907004774143	1.08859595159814	1.84197702854716	1.38283910686748
2008202	15	1.90521202702611	0.370890025531719	0.114152744701977	0.225932330425612	1.0559248320893	0.0974333667522193	1.89242816383699	4.29014076011138	4.81319691283438	0.397473291123594	0.373587231668997	1.43280232984374e-05	0.54139586443366	0.0260803421310184	0.0656953137816505	0.0956738439180684	1.03033350508658	3.56701764319024	1.59206270902194
2008202	16	2.08247515921679	0.365060298499954	0.132308811343842	0.234267917093804	1.08702453128623	0.0941888857712421	1.23677316336345	3.4910550584049	5.14403253395722	0.358851902120038	0.287079457202122	2.14423128521832e-05	0.471937551517866	0.0278422012519407	0.0932278331348799	0.0938790820392114	0.908323299534375	4.43769017686583	1.691276447782
2008202	17	1.93351685825125	0.3117524186821	0.148499683998307	0.239439073347708	1.06220375219609	0.084619775203411	0.732216270107322	2.25747648701798	5.15691569468086	0.374871419756545	0.282743266730106	3.12280219606614e-05	0.445392901184539	0.0262189918049059	0.101495664034854	0.0904230198805322	0.824082357407127	4.62440575737834	2.07016289590978
2008202	18	1.78018056773234	0.50519868310928	0.128919158869978	0.23744443552919	0.974726842193494	0.0796543762592044	0.414476696797316	1.26720282249442	4.39098828928054	0.454218185353332	0.280856561825988	2.4661096423582e-05	0.440423933203342	0.0253883657006131	0.0894093145678656	0.0855284102277442	0.769182528239972	4.91441910590442	2.52786049948217
2008202	19	1.59706334359006	0.866627024201868	0.0636542719432951	0.242152595233406	0.931829122999818	0.0514445722760664	0.327213694244472	0.970631266525944	3.38678863029796	0.626190704347347	0.28200805742391	4.05171205321313e-06	0.380713437685223	0.0273033894490005	0.0838167560747002	0.07425790778273	0.595765543610728	4.73632419869551	2.98382745447816
2008202	20	1.47885497095247	0.951589758256096	0.0495038751850905	0.284933508800867	1.06247012557881	0.0409377921708755	0.358866941524522	1.21845634973936	2.65547449765995	1.14151533487794	0.275223847855713	5.67576184997976e-06	0.289241986993111	0.0273786226574149	0.0848422107501518	0.0600698741413061	0.382022730851466	4.04987957843495	3.17306714612879
2008202	21	1.49551071284842	0.960455320733528	0.0488515565595829	0.41260720261957	1.30115793860522	0.0572031251511018	0.437322325148671	1.58607834999769	1.98006776575324	1.30911698823482	0.244721565722847	8.76336957129204e-06	0.217716678063464	0.0291049982951455	0.0812074685342446	0.0573432371506439	0.204457446779284	3.01216144677336	3.82124581234462
2008202	22	1.58460762423233	0.952579957327518	0.0452692833611907	0.499852175645455	1.26820068259074	0.100432861322589	0.50683643630052	1.37783486547096	1.57371961251202	1.09790657379302	0.203026613256737	0.000217922418536599	0.197869357383368	0.032158325452264	0.0698849397328135	0.0576035743526254	0.161743519453135	1.92425775432065	5.06527857980107
2008202	23	1.59861178570402	1.11927839796224	0.0345936727452384	0.54566829278801	1.5237294699318	0.112448257494673	0.518470805334011	0.963537396022421	1.33792095562552	0.894799572961028	0.165304302849209	0.00070094068005735	0.199188610195617	0.0364761724297501	0.0603488693317439	0.0581031101681082	0.166330334969417	1.22791293056994	6.75248062199982
2008203	0	1.14643835265602	1.20256961708679	0.0279689616207939	0.510858254181148	1.44829536535244	0.103510265097509	0.483692778413767	0.946719816287886	1.09616435559067	0.858467281380201	0.129720358782575	0.00139610766905149	0.234601515440328	0.0377441718780763	0.0522136362154076	0.0585572165774694	0.18168160200379	0.874608159245066	8.31597838683005
2008203	1	0.880655948035112	1.35677925728031	0.0322018748465152	0.450304126087803	1.54490447011405	0.0934467286205774	0.427295181378981	1.00726436705897	0.998388621146951	0.96400372560077	0.115464129787366	0.00245432291010894	0.274847621274161	0.0403849468039502	0.0412841537895081	0.0575321770121423	0.192635667064377	0.57872576459118	7.04183784228072
2008203	2	1.09866361417458	1.33704594009389	0.0423183496517146	0.508604091322003	1.70543868546665	0.0973596514516811	0.404466306173755	1.06054721887243	0.891982939336534	0.937661710863115	0.115265411371008	0.00370848790290246	0.327373917065656	0.0407836275150576	0.0318560864002976	0.0554343606348383	0.200686105233331	0.405185974921644	8.33546630857258
2008203	3	1.50537230497704	1.61000224628251	0.0383412176776219	0.58332576015366	1.56107415362624	0.107963441164929	0.413348427099857	1.07822238379376	0.787368648521528	0.844819930512513	0.137597931344906	0.00627675310323042	0.264062155542326	0.0363503468116593	0.0289337384281003	0.0529260660132184	0.186503148738505	0.295462088576965	8.15006064662962
2008203	4	1.6121070292656	2.26326273108007	0.0341293604958359	0.614878968347347	1.17403759529379	0.107761328707709	0.417327283447083	1.08872399761743	0.766235003703245	0.831713258903574	0.178986758783228	0.0104347461997149	0.0464069827807818	0.0272961844260833	0.0248851845118671	0.0509836492806206	0.198567701048464	0.230293652872953	7.19725760198627
2008203	5	1.36140158566193	2.63854071533603	0.0334326063327339	0.754756769901405	0.854532549845747	0.138453562070645	0.401336567122232	1.09002684858593	0.827513087209522	0.795724638083272	0.203284351540064	0.0180855195484353	0.00344664545083604	0.0324150582816996	0.0177196852253584	0.0510993446979801	0.171272674085752	0.202057947417727	6.05889232379476
2008203	6	1.0403583590307	2.54982701574159	0.0432583810277683	0.913413175445661	0.60848178836219	0.277367366993379	0.430183386354243	1.01977766839952	0.944062082625105	0.733578588856834	0.197512611649744	0.0262290219450278	0.00610615240260711	0.0329026684678204	0.0203525986501912	0.045992112685238	0.204610450025496	0.209453597996118	6.03025746515951
2008203	7	1.08484567367268	1.08072975848938	0.121407835789623	1.34007460877967	0.471384132467345	0.564178273253541	0.476392212902571	0.948288686250747	1.00432895533175	0.646129237376467	0.186796137802499	0.0604202882886386	0.0490549460956139	0.0284550312328787	0.0303542983616751	0.036737138999792	0.266267640029641	0.253939664559805	5.06137454439559
2008203	8	1.19795727918538	0.119841926902776	0.125311587265396	1.65163930423892	0.452763838160176	1.07113453272238	0.490597041549255	0.973525461467072	0.926919730000321	0.579744264567132	0.176044244003832	0.0790746827880392	0.0814569455673809	0.0218980667238611	0.0542399068841728	0.0578930927113611	0.318870147352036	0.312426200373791	4.03995551515657
2008203	9	1.32707900640873	0.0403949549079679	0.111263187663077	1.43535845602958	0.377112727017817	1.68973657938616	0.468068693752163	0.999701204903221	0.843145065832428	0.553175849000183	0.172850893947849	0.088113429999254	0.0817169578044062	0.0200263744535416	0.0607473236489702	0.0555702994639308	0.374506506929334	0.393006524642984	4.35651521677445
2008203	10	1.34839420458737	0.177838916890593	0.0945572638708112	0.720943480272222	0.273053764513818	1.34055842864812	0.480752712820384	0.985971807779645	0.773373139350925	0.542279590494152	0.17387861953706	0.0942903821239543	0.072879392014064	0.0189553334793515	0.0586044666400004	0.0564266310374402	0.454732706925582	0.43689677763788	5.31885230317228
2008203	11	1.23698320718209	0.340182651018763	0.0791851940203092	0.0891334381855808	0.205339331639008	1.00469158297022	0.506918418853214	0.976412528775978	0.704161656110807	0.522497809563814	0.175313425893116	0.10301469569839	0.0561263222747785	0.0197433721506296	0.0591058957074172	0.11724755080614	0.460275200932011	0.419773544760784	6.39226169842219
2008203	12	1.12230274978476	0.356054497094207	0.0677552277339345	0.0258799206958173	0.164069051217476	0.627118960863395	0.512043327888417	0.975992754708276	0.63475194076017	0.516053347442695	0.171959377986791	0.119836019742249	0.0420391213664774	0.0193148281194515	0.0549895906402768	0.222930513091084	0.443720483699718	0.36492438678856	6.50470494563432
2008203	13	1.10447499820562	0.285802484780619	0.0585702241481752	0.0250790773420883	0.140093718294048	0.224291600693371	0.527801218301366	1.01029991158991	0.560249925199586	0.530632605620478	0.165297244635171	0.169293969648209	0.0322374324027728	0.0179748541855378	0.0501588710466585	0.315586604694319	0.463578378042147	0.354222536705651	2.18783158219003
2008203	14	1.03406536509537	0.506759836780964	0.0557446444361476	0.0594993484874785	0.131098606300993	0.207584374954939	0.501935834693585	1.08500254776261	0.498960385655425	0.546061074920348	0.174911356316931	0.239746971436004	0.0274145229451911	0.0167920063734564	0.0467814573343718	0.366134489046447	0.521397534052655	0.409825126820741	1.330870882311
2008203	15	0.907184846789976	0.791905288167339	0.052884362427941	0.0827299630654757	0.13703252509222	0.198835968254005	0.450882812161789	1.11301719856255	0.447954487366083	0.556589469822877	0.181146379835231	0.294371558428849	0.0233063445394462	0.0157676269826862	0.0439160106172055	0.316065882739726	0.569121658276785	0.528453289825641	3.18772638982086
2008203	16	0.769135936021283	0.872428130489322	0.0497990259041531	0.063165554744391	0.147687734865246	0.0936776271291248	0.408777046081814	1.04984628361269	0.401242219938754	0.567119179480013	0.17887229637527	0.324050408291053	0.0204084153471039	0.0179669690267913	0.0395812419073154	0.242685431312333	0.556385995550818	0.619226697724472	5.80792170667862
2008203	17	0.719855132835215	0.901464569318638	0.0488631131706039	0.0616027381819366	0.153963218067544	0.0222735199854022	0.377691226367895	0.914450882666234	0.355797681393429	0.593261405608835	0.184658980170234	0.332002722226476	0.0191589045260611	0.0234247069618996	0.0359478259188459	0.167932668860105	0.493935752722186	0.664009464768873	6.10670447695618
2008203	18	0.71124805089303	0.805548617417894	0.0488787139965753	0.123400931767799	0.160004278231818	0.0402638785675587	0.365016869168672	0.801485498240998	0.306395507276034	0.608049346179195	0.20552537972534	0.323554393837953	0.0209132704169066	0.0219823629569	0.0355109643798392	0.127733924515606	0.451416746256067	0.744276066706571	5.85609919843381
2008203	19	0.700255817983357	0.473342779730838	0.0446198241616493	0.195317649515189	0.16816978527468	0.165437005038945	0.288512590841598	0.753054796271195	0.259972760035032	0.614183896221476	0.18166616827305	0.355505053213321	0.0249102242627684	0.0190388910215479	0.0340973138657013	0.117514448908318	0.432644677169681	0.826770799872306	5.41328744763337
2008203	20	0.72880109472551	0.183336489231042	0.035571056871067	0.236555978050105	0.17931818042772	0.29896093091495	0.266375356693593	0.716466310866817	0.223360941703471	0.614782747201446	0.149043369274478	0.374978333783909	0.0299284943026281	0.0204497020984129	0.0306944996050941	0.118290347202951	0.424146683929221	0.854164697964114	4.73327237825762
2008203	21	0.796959421893642	0.192735387085641	0.0288882272599733	0.221350734570376	0.202472277744476	0.259865330447016	0.381741590904633	0.628341275986613	0.20024125408401	0.693325663335683	0.123930308820823	0.416554391477608	0.0314016982145812	0.0206351040899523	0.0294854214042732	0.103797164894464	0.401907041454723	0.810931989494592	4.56885699999359
2008203	22	0.89604457928034	0.301438779175496	0.0271804790521608	0.174080277945497	0.214558662839622	0.218562906418929	0.677690638254317	0.556802594451525	0.201365238527131	0.866305833692989	0.114634515109466	0.477041331369346	0.0295768814147038	0.0242881960010972	0.0277319309748821	0.0647469650257299	0.370947898257981	0.739116256782327	4.41308485427048
2008203	23	0.935200418719765	0.34932457978786	0.0263729034211789	0.110585975064348	0.22668904704719	0.133479865208287	1.09204982436261	0.540518933656199	0.234321081543626	1.26145914463367	0.106673149688173	0.512842634283291	0.0241077045533663	0.0308656716116681	0.0263095503207643	0.0223471856809162	0.34382081926251	0.632738603918763	4.11600246656292
2008204	0	1.12339256920552	0.366828559961843	0.026860423764314	0.100446953144124	0.273339686121694	0.00309841879883535	1.51441960050334	0.542586175199904	0.307700551990686	1.48011172541962	0.0830064984318523	0.519199859626219	0.0203510737267993	0.037504745532382	0.0253198533649461	0.011074001074833	0.314994796305588	0.50425721305177	3.92007707887382
2008204	1	1.66917971513793	0.383158939095274	0.0305715144179368	0.10220736740452	0.286660190984159	0.0292350467818416	1.75542681280719	0.548184864601751	0.402906422832522	2.72035329513345	0.0768331950206328	0.500365039565322	0.0187537861432659	0.0397633443784192	0.024119514121169	0.00914736254534611	0.300314399698017	0.398789141510237	3.66246251442176
2008204	2	3.01703969255156	0.379020983147961	0.0360213090185424	0.107549916351891	0.277674223444691	0.127842843364131	1.76426543764463	0.57426330283919	0.473701190184115	3.19949071706409	0.0680512959700715	0.458973904028221	0.0174009598208469	0.0382637171459711	0.0228810184559663	0.00970417398051836	0.295660396457078	0.328835093598786	3.41802157469728
2008204	3	4.98149970668914	0.354778959362833	0.0380573161092676	0.103687779836975	0.271407808234896	0.195801961107844	1.6337420134542	0.627772000859886	0.476325236786939	3.59974704646708	0.0614436432579009	0.417261276331524	0.0170533263588338	0.0376215600510203	0.0220782505647206	0.0123873817728822	0.298085956543661	0.301355825541606	3.14660581939442
2008204	4	5.10814927187731	0.346084040230575	0.0381948175060301	0.0966191575693609	0.266495019937503	0.159587813556356	1.60046953004528	0.653936692515668	0.475698050214885	3.35600147528295	0.0557145423641215	0.362439950850578	0.0251585371072984	0.0367487953282396	0.0212614279084829	0.0143835970344802	0.295049043252433	0.375726264154967	2.59908921122717
2008204	5	5.04266868048789	0.319065806305283	0.0478199274046768	0.0968366493671493	0.275156291897415	0.180590887450904	2.23353253384382	0.665318287300152	0.454282987595332	3.38325780970784	0.0557642425874478	0.317292050068034	0.0685903605034973	0.0404260174330156	0.0215955794843756	0.0154585964090695	0.251817309619702	0.333372716119794	2.03065689618702
2008204	6	4.86797634914863	0.269709629401301	0.0558621107485304	0.0858981497357485	0.296584424784164	0.158438719636924	1.85155190561531	0.681588475355999	0.44520156123866	3.42703120898826	0.0561456347768691	0.294612811268083	0.318257496982058	0.0432745191123721	0.0230866144959322	0.014364927255426	0.193620562919747	0.339965327884153	2.05474689905365
2008204	7	4.58184858585529	0.254354255879108	0.0707516478583058	0.273371145298886	0.326902284955576	0.131682304159892	1.66624235997178	0.733927963210146	0.455217717161022	3.46264471790134	0.0567508473532384	0.286174940497712	0.572664352863193	0.0495003392256991	0.0381345894634593	0.012631274336591	0.148740451505037	0.419791293889725	2.11431740044633
2008204	8	4.35332129209045	0.249160001395234	0.0809928867906736	0.344683101091143	0.375284790614843	0.146212374870109	1.38091733653326	0.79260517263679	0.471527429935457	3.18702592811282	0.0472982359407566	0.268872214485806	0.200447573198934	0.045295610055131	0.0951866168728082	0.0096184889771188	0.142660664709747	0.394481549869673	1.70035719568521
2008204	9	4.07100761359495	0.243822501552097	0.0938566206624929	0.265869637287225	0.414445472328608	0.174104678749261	1.30564211372291	0.865047148129055	0.464901160037558	3.08349318235195	0.0417650054454167	0.258461227195205	0.107272971155231	0.0424459918022839	0.161428309985398	0.00670921718219805	0.121959162830935	0.406715053488891	1.15983185647658
2008204	10	3.8452419162649	0.229427299250178	0.119653532403166	0.191931694249011	0.44397435914261	0.225295621887469	1.30325040422198	1.08946344790209	0.471036102716925	2.92228570893639	0.0609899129996127	0.257880351077807	0.0680303535207092	0.0359257030075311	0.17621373456083	0.00603005807753417	0.115301906486715	0.435544911928032	0.721517242719081
2008204	11	3.64055064979113	0.188918945575397	0.203517692745479	0.160737810950483	0.466180218423955	0.249318332370571	1.37455994478449	1.53385033375831	0.476252933998146	2.51406253185742	0.112898537192531	0.253803318876501	0.0525550079134467	0.0321210767106809	0.172581821531351	0.00391225243613247	0.109237943784728	0.466806314857905	0.495518893981257
2008204	12	3.32513041868487	0.168472973807214	0.170210968124933	0.159562208808547	0.486366402579312	0.21625873042296	1.28261616805807	1.78226316024398	0.481267378098859	2.22913202663873	0.169648518745142	0.248989992873875	0.0434819949809071	0.031580883155472	0.161669211058278	0.00259616859929229	0.107889978598933	0.493994037358486	0.345302770189038
2008204	13	2.77821325728733	0.299691482597487	0.151279356987143	0.178968031771587	0.507186596826907	0.168422960880002	1.11718414206138	1.79343869135536	0.513641202557733	1.86021831845713	0.218616663118948	0.245904133555079	0.0365690907937854	0.0320739934744496	0.148570856116474	0.00292875676215481	0.10906918550032	0.546283094335821	0.262627699610303
2008204	14	2.09416248362	0.54237872804182	0.135086276804394	0.173617873493507	0.528066608204402	0.144955180366737	1.07160546573246	1.73652518506301	0.575892691474096	1.40956167286757	0.240933446026946	0.239813242642491	0.0324349967424359	0.0371080071552837	0.134173289177092	0.00486299009227264	0.110841385446675	0.60229371818808	0.221094140734931
2008204	15	1.61149943209184	0.649354480216937	0.119620673551865	0.153933336411969	0.596187032930975	0.127320300718168	1.05002425095556	1.64629772350246	0.654064980855321	1.21840230524472	0.237475718296892	0.23637739826082	0.0308745145806784	0.0447118736977899	0.116908095181669	0.0102956028452858	0.111536266433438	0.657969313148067	0.281467146097708
2008204	16	1.45223824785106	0.653135156665184	0.105231513646407	0.132024709823269	0.830878612927134	0.101583534628533	1.00683421979354	1.50012734476259	0.706740958938991	1.17522319766645	0.217657845545705	0.21746302666093	0.0296974414792939	0.0502031066529433	0.0982088863401951	0.0189916909161459	0.114449350976103	0.697688229874659	0.345381244890869
2008204	17	1.63285973255431	0.623402639538799	0.0986231209442959	0.121161355327917	1.135300107181	0.0859727825758752	1.02840160133467	1.2804503249642	0.723662079296561	1.12115877091744	0.193042837849322	0.190665052850883	0.0297360405282409	0.0513177907191642	0.0800281020345053	0.020764546979685	0.115335871016008	0.724236140465123	0.347046604880329
2008204	18	1.99568058156903	0.566518755241387	0.0996757798284078	0.088041605843788	1.22860306993614	0.0643025738416917	0.993314210998511	1.06539017064868	0.673267481477768	1.04908056383472	0.145923841887006	0.145435164596264	0.0324066986585758	0.0488396889213216	0.0645564256230261	0.0196616781232976	0.112786081979087	0.721707796523387	0.352883726474851
2008204	19	1.94689546100234	0.476454387258048	0.111129731057554	0.0756522325516043	1.11808368207247	0.0497963212415627	0.915605518211119	0.894618220250051	0.636968469707266	1.08521192882778	0.0938319663558043	0.104463384366488	0.0423114037991584	0.0451740610521806	0.0558047544010356	0.0150636300941791	0.107515233493606	0.71787810663974	0.400600608656337
2008204	20	1.66345950242358	0.354205211214089	0.123891369043189	0.0748699304173586	0.97657000183772	0.0422281379250505	0.853272006489207	0.780615141291564	0.737099186839169	1.06640897686333	0.0783188617851916	0.0947191641039134	0.0555545663873598	0.0412147438898284	0.0485757238497365	0.015686509280501	0.104259153406604	0.714103702873137	0.474129127168648
2008204	21	1.33818701891005	0.251200326531736	0.123702353668574	0.116554714673428	0.925884999454735	0.0492227502784337	0.811145694509219	0.757206183135153	1.04806736957122	1.01166451828162	0.0802541856397688	0.0948725912757783	0.0705021951957682	0.0381538527364765	0.0392333132748448	0.0586900403059776	0.109673556595592	0.732225009288451	0.574818131399317
2008204	22	1.22458334026159	0.183347335079301	0.122150256672967	0.19537392692886	0.840878554934147	0.0933775270287988	0.795232273410881	0.701407185764686	1.40375236824471	1.14056856960171	0.0838712047907543	0.101400120897827	0.110947968300295	0.0353272649474645	0.0301319726291348	0.0542225205733247	0.141909593691114	0.895705224397724	0.583614678656396
2008204	23	1.24178453463493	0.172418107132487	0.118652779962571	0.223600655063724	0.727492690431236	0.157028237337312	0.827197229361162	0.638248746525882	1.49618738875979	1.61575517936349	0.0833148105019456	0.0951177398962862	0.204659764404128	0.0325423217480706	0.024190978369036	0.0898608277318653	0.179505577655282	1.25929410784469	0.575758583346148
2008205	0	1.28907347035799	0.154017885534238	0.117802266746567	0.218629523292979	0.689053607008535	0.18280635071579	1.00786760869972	0.633640810837399	1.49585459940003	2.49445680828519	0.105954889722756	0.0821147837261525	0.347919476513009	0.0300033831240294	0.0222593878487527	0.091915886622877	0.225144616527708	1.43167620246003	0.577455729446833
2008205	1	1.30968004001379	0.140133073032413	0.118469816979047	0.210364041322366	0.631127449314429	0.180566580221943	1.42056982042096	0.699468875854628	1.39279281778293	3.18589276087562	0.176509113143111	0.0493939598255101	0.450987667871817	0.0273200568252455	0.0218716174215803	0.0838154619132875	0.263993913558373	1.47225974970345	0.581050697138004
2008205	2	1.35728711670344	0.152867515754546	0.120234935637319	0.198111250779576	0.572863070257708	0.174010453228191	1.91535371241501	0.816613984718791	1.35203935481588	3.53475819532427	0.240398954905666	0.0360207097832059	0.46218682828513	0.0251232119567938	0.0209510709341776	0.0844015773394842	0.28410285252335	1.47551869284314	0.594695542554838
2008205	3	1.60727225382393	0.192081167382186	0.123044525518709	0.183310832775618	0.521146442185148	0.169268637117041	2.26831838050818	0.96973744062849	1.37183033500575	3.44978634240415	0.278474347166261	0.0342233134065342	0.457987416458872	0.023638986109717	0.0192622130737276	0.0909736387207428	0.293030762910934	1.52518770118799	0.608513125188655
2008205	4	2.37923127392944	0.228748120730337	0.126226798608912	0.166907615386035	0.489252363658793	0.166194534576181	2.4102560738103	1.13949314395302	1.51771587212825	3.33826320201674	0.214946304591423	0.0390914616563724	0.460163375629905	0.0228961302964618	0.016637903733103	0.10287601409006	0.299300925233096	1.66432721966759	0.622327537612731
2008205	5	3.4591431968735	0.265751157743461	0.129737790673874	0.15152062058448	0.472541300423114	0.165178172301134	2.18639036872632	1.3767161386653	1.77482499248363	3.00934474728785	0.126179293785737	0.0392969206418945	0.469650852711806	0.0237376563471163	0.0146312048929023	0.132958880584849	0.29995977615088	1.8562053753033	0.631718870603966
2008205	6	3.69610808996572	0.395430593997628	0.247436074008601	0.321095535860443	0.46904201476318	0.163820951207411	1.89394186104984	1.7501395806832	2.0226181823191	2.77826466862772	0.102856738598103	0.0458226609980969	0.525179660119551	0.0496638110711534	0.013648629299761	0.142393217963241	0.292300807311972	2.00609256975287	0.635388072779385
2008205	7	3.51682374650423	0.976914804785178	0.288404368589251	0.451476784727869	0.466505101145727	0.164990924063742	1.63243695558881	1.97429329209343	2.10426978269752	2.48106388461994	0.0969056346729524	0.0514436972834245	0.548377458280123	0.0650351945223691	0.013792767651765	0.156186472222185	0.281457304825097	2.08571579882527	0.65843018128526
2008205	8	3.20351938009037	0.65655546367741	0.323457318487458	0.478352952064008	0.472821244890879	0.168763663177613	1.49538380760283	2.06521479512095	2.07545336422973	2.24430174141526	0.100803141771146	0.0482608740615463	0.543779572979625	0.0541751644973156	0.0138442747651357	0.149099870238927	0.29600904134179	2.06812460161089	0.762566071989259
2008205	9	2.7929798122143	0.449108718314306	0.270641899395944	0.388131719543959	0.488523552047983	0.16099524664147	1.22467415697317	2.153707321809	1.97025719634947	2.24020089773217	0.133805049547121	0.0512902898264488	0.398886776544503	0.0579301001762588	0.0140190423891238	0.125795527672611	0.268339765870122	1.99628079856477	0.990458313956013
2008205	10	2.53891398372011	0.409631388676006	0.221905467581804	0.277826806301804	0.504273341747439	0.146481078275741	1.1412852777408	2.20727964995471	1.83353840993477	2.21905969640185	0.189892293899903	0.061130471397498	0.309579097768302	0.116345905344715	0.0143495730199021	0.109159746494703	0.218511609522936	1.91916119588101	0.932083990958238
2008205	11	2.33698078362178	0.373964062273809	0.189892809904383	0.212377847811188	0.517956445572388	0.138506370694054	1.05643179081538	2.20985696811561	1.65847150519658	2.34863434178049	0.205110016188357	0.0627882353315463	0.261093526449497	0.106512650172595	0.0159470128855105	0.0868377704579115	0.159192315276432	1.84863455964941	0.736776319257291
2008205	12	2.19291125033187	0.34819212137371	0.159674124250759	0.171537378030642	0.531473420780121	0.128990259218507	0.954018024668669	2.25825880236775	1.42032098225878	2.43930606997262	0.213757606358264	0.057891519702805	0.239738963560164	0.0931510079888255	0.0165980367108296	0.063835448714018	0.125842152820143	1.8069197534975	0.588021003270237
2008205	13	2.09885359553276	0.326810033342761	0.133844264807038	0.143706455086853	0.539891132215041	0.11780425403226	0.858115873846611	2.2348095069917	1.18829814453727	2.42015072907136	0.24935708374747	0.0498788076973781	0.246339625345903	0.0880921366821535	0.0149401253400643	0.0528385753584413	0.108084370320278	1.78794712550181	0.505117939306538
2008205	14	2.03266609523419	0.316657429600725	0.113197221505056	0.122434346152743	0.528698801311596	0.111885443134952	0.912445069263068	2.19725966092935	1.00709732012285	2.37559759014307	0.361064539784664	0.0436817290592881	0.260986333800117	0.0836384202023756	0.0136550102159959	0.05192598243799	0.10965075528713	1.73024642369681	0.453086058491131
2008205	15	1.98718106247508	0.311148386552467	0.0952039708807808	0.109490437717187	0.550737530266872	0.108291084230018	0.942366222443879	2.14461431996583	0.879442490091199	2.31757590689517	0.481098906321788	0.0386554791511205	0.291986368477239	0.0791010888448609	0.0128319941961315	0.0472568576803597	0.10941990956365	1.6282780126416	0.426008325268516
2008205	16	1.96940713090874	0.31077205196732	0.0797636062736634	0.104323582895312	0.595064517168897	0.103677906983584	0.930751535511798	2.07614746488395	0.798399952612504	2.22315394238966	0.500580092126745	0.0297434507824572	0.341870905984634	0.0748371136431098	0.012403402420515	0.0444102822095292	0.109991369925452	1.54110892329182	0.396339369241327
2008205	17	1.96702994962639	0.325379825693165	0.0644462339212762	0.105749788083157	0.658763146832719	0.100878444213677	0.902487098127129	2.07436242423377	0.773292962735561	2.08766785931174	0.504716126009779	0.0234857352414135	0.435283931290953	0.0720331361350779	0.0119776346484457	0.0405250165475407	0.110918295251487	1.52578716601034	0.364813968529646
2008205	18	1.96143548303207	0.366846207054481	0.0542026867794347	0.106217295800692	0.722014567287009	0.0889410631177883	0.893433992445973	2.07806897316472	0.785777749586515	2.05640537795266	0.466215408070367	0.0204189634285034	0.597220072010424	0.0721364896313855	0.0118662072032631	0.0364596608086384	0.107534261660192	1.56049989182401	0.34665043069657
2008205	19	1.94892612209782	0.444908907436627	0.0484619797876501	0.127155504903555	0.776807274508002	0.0827222796522763	0.632305560038322	1.89960652924563	0.815627922680935	1.74778503788599	0.417539850131363	0.0188652611530531	0.795935825150204	0.0697589218030473	0.0115852692317302	0.0294576506115185	0.0964217121666404	1.59478365708027	0.344740751518262
2008205	20	1.94033559883459	0.502166543525979	0.0525569826187007	0.139530316971794	0.748569983650596	0.0750371766079399	0.524679790825817	1.54154357325775	0.860830044651256	2.24472683122845	0.380613917396691	0.0190687453832175	1.00940963387083	0.0681600960050304	0.0107778700706693	0.0259720766287896	0.0784372507417491	1.69214995169592	0.361162841116525
2008205	21	1.93730783956066	0.498837590063056	0.05966382503115	0.141196783726992	0.621147623846486	0.0635276838046581	0.56056789555098	1.37205149626216	0.901748528713005	2.74650396937363	0.376009295716553	0.0197249725649694	1.28324484540119	0.066809647619691	0.00932939208186165	0.0240863817313507	0.0687810774620766	1.87497830424577	0.401349068505119
2008205	22	1.94655586966245	0.406605309550094	0.060739279370043	0.161842303884979	0.531795259848178	0.0637765588142366	0.606329669888753	1.2827652595364	0.903098362169267	3.17300029788147	0.379813948266563	0.0198287866167323	1.42597389557016	0.0651169301632804	0.00722714179414734	0.023291131569158	0.0682107220599753	2.08098447956935	0.437904044794181
2008205	23	1.97119477622624	0.401360154593447	0.0621937158875311	0.212127623856615	0.470095310726292	0.0823571838234446	0.743607878263669	1.33016329007854	0.851811115758865	3.50448807294021	0.387243585303321	0.0203790012636594	1.55033569040884	0.0623153682825663	0.00625622327137156	0.0249250453558517	0.0717927484957372	2.31235383081365	0.512998346722279
2008206	0	2.03589325120599	0.504132382375949	0.0660968054189993	0.291003062122078	0.413635470475943	0.0826538671533132	1.01568152218504	1.45834583541635	0.850922138193042	3.83574439041462	0.392308157503278	0.0265814884849338	1.72061024301964	0.0581674040565242	0.00642973324127946	0.0262572473180298	0.087995386646599	2.32978402067645	0.563815677704694
2008206	1	2.08259687983608	0.552794525806069	0.073595202584614	0.347314092997463	0.376109656278645	0.0706399773612019	1.33763345448185	1.62642804514282	0.932187728551186	4.20203530686477	0.399655635421023	0.0395422934133498	1.84141767591292	0.0525261279554177	0.00663467730148921	0.0266168955765488	0.128601313008446	1.95347386634038	0.646458075105415
2008206	2	2.03381137999871	0.572581546689312	0.0811457799629066	0.356425865784993	0.35458457264151	0.0575782239324487	1.52644203944969	1.70738056419057	0.961110897386227	4.39593739461804	0.414619084971516	0.125844162075416	1.91104069709925	0.0463211844173118	0.0066753999087258	0.0246689383241456	0.191734980246402	1.66468965014707	0.681458445637715
2008206	3	1.86687000058114	0.591197342150552	0.0755828213412885	0.38791213086187	0.331675625788295	0.0478905229077955	1.76460864570883	1.71575665762104	0.966991227826776	4.43291382761976	0.401741126009408	0.262208938393606	1.99624954917611	0.0417875229359251	0.00650217478258672	0.0225532753095562	0.275083717124761	1.38677047566587	0.656446219514184
2008206	4	1.69263511972488	0.627448919573077	0.0770988755064603	0.409963181798095	0.292984678533822	0.0453402160344402	2.26906402306635	1.65254592997097	0.902058662971526	4.368338315824	0.390000804900082	0.272411566472954	2.10183070746062	0.0395887532825915	0.00652457579186663	0.0215841221245107	0.30236740558338	1.12935120025228	0.509505761944758
2008206	5	1.49001781130807	0.706508426760874	0.0793924819982197	0.347065793983103	0.261052434409474	0.0353692162231741	2.77596581701764	1.6377028843052	0.812742150088098	4.24812349799513	0.368605656686161	0.290578995874341	2.35140478501546	0.0372932275137427	0.00600689878648671	0.0206864344823928	0.3117267697201	0.952131815356418	0.415836694866722
2008206	6	1.30384676015837	0.637521669462376	0.0777311954502271	0.17020171392302	0.227608375495891	0.0294796350263678	2.32045414268247	1.44475963246059	0.709085077171374	2.46259393846651	0.341369251088185	0.340867174881772	2.00185016208084	0.0564041253803004	0.00507967731048332	0.0216491424292318	0.342558735210619	0.864536439583403	0.430447074951563
2008206	7	1.16291412123818	0.452221565249544	0.0616778190688043	0.0926744287769983	0.205773828337748	0.0325428598929419	1.62439530025732	1.23686621981581	0.572200805442572	1.73270937740225	0.327449131655973	0.313114164147597	1.24184675325865	0.0942963119807546	0.00449062052178824	0.0234083108594231	0.373350494470334	0.787891200741791	0.34785835101063
2008206	8	1.06379549459632	0.294420112899076	0.0424495968385884	0.0633068105598216	0.197475293517651	0.0322779793517988	1.08051426408239	1.09823547449738	0.489281461248176	0.940101021761877	0.336084742947095	0.215615298407674	0.706746558726478	0.0869258525114621	0.0043034877884987	0.0230510316573321	0.425185236714938	0.628854003252783	0.291096584749308
2008206	9	0.980755465143925	0.194205644419433	0.0331190782609254	0.0601515071770859	0.195663482416291	0.0342760606702935	0.692870260054464	1.02773822322497	0.395466930527519	0.638562700210279	0.374810598666986	0.161045779865316	0.469572657340716	0.0711781914681018	0.00437410093899341	0.0215586933223195	0.433844060044872	0.668935618987387	0.272641293615008
2008206	10	0.923653253036966	0.134014112251344	0.0293126579889968	0.0664155718911526	0.181923251512535	0.036396528542814	0.434262983419397	0.75623360436706	0.339172945021412	0.481985891806279	0.43547107501063	0.10657565553371	0.343815863000504	0.060541055728043	0.00437820402280034	0.019201543731368	0.409344156877629	0.845379943287383	0.256897779559558
2008206	11	0.855868901200474	0.0963200184822126	0.0257594761812263	0.0730476177197128	0.203195356801843	0.0389673638092859	0.334953944644696	0.546028018151287	0.334576055456789	0.379928017688538	0.481570101898067	0.0675034541393053	0.30259423224699	0.0543641902877829	0.00419431226720591	0.0160686105978761	0.466162495461839	1.05123570107145	0.227071622106257
2008206	12	0.801051715855727	0.0610494401086074	0.0209031408228431	0.0855567471581251	0.309652280214011	0.0359228150986113	0.280315767744724	0.417311934590138	0.360835861300645	0.363334089345812	0.496667007618331	0.0478506931174881	0.297920539937926	0.0513872417731301	0.00300826707437577	0.0132592367082573	0.482548503995826	1.29313186252964	0.196665462974719
2008206	13	0.75288988766683	0.0398518395664566	0.016732291801343	0.105771480162865	0.447871848558648	0.0316076354186941	0.241699013952202	0.342928943901502	0.390737060311436	0.321805774493326	0.492603061903315	0.0356574473093494	0.282476954462219	0.0521451168899351	0.00440686572886743	0.0118352734443399	0.58514883324486	1.52819458856136	0.160092396431461
2008206	14	0.717916435726113	0.0336253926913328	0.0152506106461551	0.136685920857916	0.567648996415068	0.0276980734023364	0.221722591580192	0.326678830198235	0.435520805819958	0.275897805070385	0.477393048182821	0.0284999984073549	0.269526096707424	0.0525469275997889	0.00513519033157831	0.0114598077379118	0.787516799255442	1.69968818675013	0.139544136095322
2008206	15	0.619470881595488	0.0327956170133524	0.0152396079594493	0.179421694447263	0.677907358086083	0.02429269528916	0.214437173983017	0.361689106297561	0.474712629714773	0.230733188886723	0.455365791578655	0.0285981941213358	0.253834938550206	0.0532872296351306	0.00347778489805928	0.0108496195084084	0.983970982199481	1.71881982642149	0.132714500938832
2008206	16	0.480978704244361	0.036724529863501	0.0165215535702022	0.211935576792207	0.787687455432775	0.0214255668574191	0.216433085182457	0.447228897700586	0.514233200390083	0.200142526694771	0.39861841895085	0.0278172594610077	0.2280912555959	0.0542551056438439	0.00212112973365966	0.00978723146440325	1.144953396556	1.69866674661193	0.123957395198711
2008206	17	0.39593021168827	0.0471443602344673	0.0175568563652558	0.224144459901391	0.969156744369328	0.0187263646754364	0.204841973992626	0.568864925169683	0.563110805462816	0.194084365043698	0.354864124334015	0.0293703517205185	0.203636622798197	0.0547070629392137	0.00209890184340363	0.00841347786221219	1.24512565630989	1.67480234449765	0.103633874683157
2008206	18	0.379341029643412	0.0647646756165803	0.0180572920485814	0.231336069829654	1.0869749597396	0.0182594241830096	0.180803877612496	0.717071376536825	0.520557062212081	0.194025014681173	0.3244793653639	0.0488691599760515	0.210450781082291	0.0541839886773838	0.00235846940212079	0.00595170383443964	1.26121157604415	1.7285039463576	0.067266945452392
2008206	19	0.388270002190078	0.0918443052403623	0.0185949024502785	0.250702740061667	1.11340836654936	0.020215554103091	0.19590639852677	0.814267227700601	0.340835860343069	0.205740930444592	0.322319912767772	0.0786493818979714	0.260028235318282	0.0513903551852207	0.00265174817089112	0.00333111072822565	1.1489707607418	1.52483823664391	0.0520640555057592
2008206	20	0.478926394448496	0.121578463488826	0.0193402411069253	0.238951165438331	1.1101988556365	0.0223075396778859	0.275053206788971	0.849412061271171	0.18433653141392	0.229606617060974	0.360166064396684	0.133213789777159	0.306776651623388	0.0491820689425671	0.00292445744285331	0.0028334774847106	0.908953343156672	1.3882341096088	0.0524834414270789
2008206	21	0.630786530004191	0.141574975516142	0.0195415973889224	0.177744073479928	1.12316564457567	0.0231654744952524	0.504104718911769	0.814012326177863	0.138576600244645	0.277162819906466	0.238067849800398	0.198613575743222	0.354333783906247	0.0469003691742788	0.00307971916466643	0.00304953699354414	0.751954680228177	1.0997866999977	0.0487843510043904
2008206	22	0.690783929214456	0.153788443603988	0.0193506621498297	0.150873342686434	1.2140408128138	0.0231751981773036	0.679069389248556	0.818212178698937	0.13558582839338	0.396046519751731	0.20344593195727	0.237990054132382	0.392053205678659	0.0444969623560373	0.00306346537655154	0.00665091519733717	0.699373397823817	0.867506048428734	0.0429203122010266
2008206	23	0.680119024512713	0.15056829599302	0.0188129168057752	0.137770044094494	1.28147832858229	0.0233596330645295	0.691982566740165	0.855393157477307	0.136935105164997	0.597064989578967	0.217206581869047	0.233305803746072	0.463047433907146	0.0419481980747983	0.00287685835218458	0.00780035417870069	0.711517296034705	0.739078172027242	0.0371725340694565
2008207	0	0.687566614048068	0.126594651637719	0.0180832925547511	0.133924523287612	1.37528029549752	0.0228890771570717	0.47819237829827	0.895799025773711	0.164007965551745	1.09227928353531	0.226545797055417	0.229915929742266	0.515922822984267	0.0394103345216566	0.0026027042052859	0.00832396068808275	0.740622973316697	0.568985134709586	0.0304458691256243
2008207	1	0.704222496497706	0.0906445831805864	0.017319841797362	0.140406498123158	1.41021551380311	0.0210917571455493	0.272089812959142	0.948551882646001	0.199897979675425	1.25584255840164	0.223997019359137	0.21272830181171	0.608777649225428	0.0373412764597721	0.00211372555692054	0.00812385890472084	0.760228163224128	0.514294709407661	0.0217647569078868
2008207	2	0.703837703370884	0.0803825022760057	0.0167072878711859	0.140469777694478	1.38761392875062	0.0182256298312075	0.224384829068103	1.01971741351179	0.235972228734917	1.2298978830579	0.222940300837546	0.178003996604549	0.706708700754742	0.0358008843976917	0.00167772695470856	0.00697744406992263	0.77474200509097	0.490422022545266	0.0146085176876106
2008207	3	0.723664302320198	0.0792738304202391	0.0162829576197878	0.132404927380005	1.32970902374334	0.0148283018912964	0.236957868288863	1.07090874946538	0.287877625516386	0.541613106916246	0.236565314678224	0.143455218541307	0.759341929042353	0.0344894824499766	0.0014245437466706	0.00717894979249187	0.75305339314033	0.392824036955323	0.0120306938459471
2008207	4	0.757346664708394	0.0802369974687008	0.015991888987886	0.126318689439699	1.26513491351067	0.0125399569434614	0.271752250174996	1.09870961298513	0.332518845253375	0.323199273056805	0.251197881803592	0.124321251165786	0.822446157638228	0.033252529412713	0.00127008624228417	0.00778475883547358	0.71433749259296	0.323612462731792	0.0112962733382665
2008207	5	0.799479506647214	0.0802142854722426	0.0158008467955329	0.120570279378712	1.23228819201198	0.0134274525809139	0.314722802634256	1.13294063161603	0.36950042979276	0.322070358862514	0.273803014870271	0.110985899745779	0.889853273108086	0.0322837724607384	0.00119570798251654	0.00773833391693598	0.703348627782125	0.293742355459622	0.0110316700560149
2008207	6	0.814577339094753	0.0760077253127999	0.0164424957629978	0.11209023163136	1.25186682890396	0.016400753042026	0.366143020155717	1.15797913329487	0.403929816832252	0.328338629646348	0.303582666376936	0.0928538437994601	0.729476458709999	0.031100674632162	0.00116411090531892	0.00715251096481776	0.704974027717931	0.278502852595878	0.0120156782430017
2008207	7	0.848599104263249	0.068652026977051	0.0164968821102072	0.0997936236216408	1.26219593893235	0.0201931947434422	0.432514155362641	1.14677954314756	0.412703690304754	0.329328609554868	0.320852687042525	0.0818579707838576	0.351803414872927	0.0386229611092051	0.00104386209749738	0.00607733066867631	0.663282411418383	0.28132501082044	0.0140386929018464
2008207	8	0.917792341480414	0.051869906833631	0.0141304653383974	0.0884806307125041	1.23711266769013	0.0239701362335362	0.479053248250008	1.14079367496896	0.328061238589693	0.339435036876521	0.325990203747301	0.0718675781504149	0.324257800754972	0.0395243587296999	0.000676921770948362	0.00530250138748201	0.621192535237997	0.282380447767746	0.0150410326344573
2008207	9	0.92566770690197	0.0415356410979585	0.0127625683018792	0.0657809329333932	1.18622846874562	0.0262148933497342	0.491011667293291	1.14667430171322	0.257441682045881	0.343159411255014	0.328472642917968	0.06099463782268	0.267016919399538	0.0448958476686443	0.000500855315926807	0.00461531212794675	0.5860528503757	0.246934517119445	0.014504723369108
2008207	10	0.861226106838656	0.0416580282764988	0.0131631315366252	0.0536175385552513	1.09389913432901	0.0250499951591474	0.457891425672709	1.04717073521021	0.187351558079196	0.314249901053701	0.339863814636284	0.0491368736452221	0.231773993217732	0.0377525306165497	0.000479420957181452	0.00328459647786757	0.540657738844962	0.226936348360359	0.0147973768742434
2008207	11	0.789322224973452	0.0541531973756452	0.0144236758221765	0.0422615639832302	0.990799445868637	0.0192796328633708	0.372736451504863	0.966620573333308	0.154644124771828	0.317380016373241	0.333849245936614	0.0391421963062737	0.21741073807286	0.0335084034272999	0.000514463161819288	0.00265868930138505	0.536713179654781	0.186749744164786	0.0157474047142109
2008207	12	0.754810112760491	0.0655391397747057	0.014607532658949	0.0322659512550576	0.956686838294198	0.0139424412740629	0.298087053021164	0.944241946275135	0.134105256325694	0.28252728905636	0.288142225000019	0.0328707544048163	0.188975626661217	0.029958763161804	0.000516165530090922	0.00231051685569365	0.574021405157597	0.185059288562904	0.0156424237736368
2008207	13	0.749217037687981	0.0650698850475809	0.0146248934555789	0.0253109885945693	0.893591012085657	0.0105376103950166	0.265655878849701	0.931132531881412	0.120254851824752	0.214278626124034	0.310573578773572	0.0315702644126824	0.178268126801921	0.0269682785784081	0.000515881109748085	0.00185698063817887	0.616211041131187	0.189184173762404	0.0147342915055901
2008207	14	0.732563049368226	0.0573353650455489	0.0152450096269071	0.0263953431955891	0.885400833681848	0.00801998912642722	0.243350404649439	0.936378954284524	0.119082788697913	0.196261145602428	0.371412627535159	0.0327388062214269	0.188143809005211	0.0247550631098939	0.000441352145700435	0.00147541092787683	0.63775167345186	0.205337421672343	0.0140082792984784
2008207	15	0.714038218641768	0.0398913562589676	0.0148724757116207	0.0398879914065924	0.914651312673702	0.00615246153097221	0.225513785460163	0.987598441146276	0.127372351758725	0.20237111184279	0.418034726390479	0.0356607293791254	0.181690946628108	0.0232304714563335	0.000380655108148737	0.00139142951162915	0.605196526750032	0.221867417294257	0.0136056244629338
2008207	16	0.766893514146173	0.029896853381165	0.014311846466866	0.0609329081835985	1.00854007726481	0.00498974408678819	0.213111439515268	0.996018219461095	0.13927530159148	0.206234012605721	0.413620364051544	0.0368402977588516	0.178196894817672	0.0224721115202444	0.00039761830211824	0.00151247539947134	0.56060451677337	0.245362623821951	0.0135359175920551
2008207	17	0.806297831436591	0.0268852558914876	0.0135513026565997	0.0759063138872861	1.04873969761442	0.00428752136109905	0.198825349438323	0.978777049049446	0.150496926528075	0.208595116798002	0.406169176576211	0.038075952123806	0.188290400621957	0.022821699540151	0.000439844452680819	0.00167526333811151	0.517302404791652	0.257183705375126	0.0135050273486559
2008207	18	0.846017256038891	0.0288719689421122	0.0125908735939132	0.0875149716644577	1.04410605355181	0.0038325517627937	0.186439758898845	0.977703774709177	0.152528515325873	0.216080599211834	0.349114217334632	0.0407881087258036	0.229586527721263	0.0252752358760234	0.000556473667855795	0.00170233002234131	0.497320145160115	0.232828967895348	0.0133281746696531
2008207	19	0.916423998427914	0.0398996889733265	0.0108365532019851	0.0903979504227193	1.07930247945686	0.00362393901106135	0.209688482265103	1.05055003948565	0.147479649300767	0.222423415986804	0.257829172802829	0.0432974969716678	0.27083375129777	0.0279237188620934	0.000692491976828676	0.00163054355827235	0.46236325136371	0.192445556976226	0.0129592785673481
2008207	20	0.994465408691776	0.0509742296263822	0.00961666387462633	0.0846390536113719	1.12302870509623	0.00360678191745135	0.2509217108016	1.12345220415835	0.145771158324809	0.244889110488746	0.166539737866352	0.0435609583422207	0.30181692874084	0.0288166965922638	0.000742149717714471	0.00163904648354705	0.426864423844094	0.169172741099361	0.0125435255518023
2008207	21	1.05079416706118	0.0539130520580746	0.00878528089347708	0.0653132865047627	1.16790757581371	0.00407586085663522	0.266217790761143	1.17831547460077	0.155232443298672	0.27134585829418	0.155829028373057	0.041605908796141	0.282771284656161	0.0296278122244157	0.000944016448873677	0.00219949713605424	0.415524510124015	0.156723705096325	0.011904711614973
2008207	22	1.0810619648172	0.0556992199235953	0.0082750519750115	0.0488082149524246	1.18811921747158	0.00464310455894724	0.256145611020807	1.22175937055218	0.182747858516182	0.28165143970788	0.167043746711337	0.0398872603392276	0.276971509163805	0.0301608254544014	0.00116973819291266	0.00307506336091006	0.427951947572713	0.158983048249775	0.0108714727168345
2008207	23	1.10435274838623	0.0539405668877669	0.00801190849981674	0.0432609519538812	1.17310753775295	0.00479059350191148	0.235621477655364	1.27935398158436	0.232075357249923	0.284042773696272	0.169702236397923	0.0394258463610001	0.267086189207848	0.0305081836759731	0.00150967237582253	0.00341676346054474	0.406042801162968	0.186774788913407	0.00863358074839998
2008208	0	1.12569665552751	0.0431077558178065	0.00789818612614704	0.0419022509960563	1.07008794527898	0.00498161638045115	0.236372179660651	1.30348278252124	0.282491742473057	0.278414812138763	0.167075529804166	0.0388620851933654	0.280832003239494	0.0308404970495954	0.00197954366640734	0.00352665285641502	0.359054527987734	0.218682948870464	0.00642156969014706
2008208	1	1.16288236879635	0.0288226620907439	0.00781088018001749	0.0403616778501977	0.939065229477299	0.00535885184433789	0.26262178023966	1.27914099955599	0.310178557507677	0.283013656990127	0.170684830176216	0.0365803347187288	0.328576435367902	0.0311360662585017	0.00260965791456511	0.00357295048704812	0.327373434122132	0.229695458370748	0.0053549563923791
2008208	2	1.16103792637306	0.0231381080346271	0.00784201451137439	0.0388198515126115	0.855856831595281	0.00581870670277442	0.330636034144443	1.20693009715536	0.351693661846367	0.31312780543806	0.187493426093415	0.0341033338838768	0.482984413792458	0.0314460928849803	0.00340974278268133	0.00361767416106282	0.33296349119043	0.240998650369696	0.00496434948792806
2008208	3	1.16541576516745	0.0222241902995707	0.00802230342841176	0.0414900317063625	0.842581109299765	0.00635344571487196	0.391559687325786	1.13224297493299	0.401605741306733	0.38822486808799	0.205370323810328	0.0322018185687393	0.539667153360833	0.0317093215988114	0.00449060622328256	0.00362930417875676	0.343869658039214	0.2440572859805	0.00486585708643686
2008208	4	1.154164572671	0.0226887891738461	0.00824613130855029	0.0465963304602919	0.860548788407197	0.00687907878770689	0.425811295360072	1.06801892711965	0.456504729387426	0.500360328245183	0.222067014539455	0.030613961601316	0.413974354794006	0.0318212804733097	0.00548924344728625	0.00358904882035981	0.346270617786878	0.247547185826146	0.00479607022802638
2008208	5	1.09634304179856	0.0234468855781647	0.00844922178924467	0.0479418304912886	0.858453723599953	0.00708378557519092	0.496955157037421	1.0282462761659	0.495198311197595	0.498205055938986	0.23402468200745	0.0305486606310918	0.29418022750797	0.0314581700068931	0.0059690765943689	0.0034439215717639	0.358454580334885	0.24857896397141	0.00480539605597297
2008208	6	1.03142532950883	0.0240051714907483	0.00971366870965686	0.0398181335778051	0.810250476930974	0.00692430017855105	0.547143252729604	1.00297682839905	0.474630298164622	0.475264537591315	0.233142546254124	0.0368418716866567	0.254248466012529	0.0682699505362113	0.00618281408679402	0.00309209185404471	0.380011422098803	0.242590804453316	0.00473609325736852
2008208	7	0.984792325354515	0.0228224064540649	0.0123020986966699	0.0334540015484191	0.762482041010864	0.00647864142654792	0.583900045970156	0.970872300874231	0.411180548286454	0.446317544056006	0.222059071916918	0.0486567573588027	0.267813708317253	0.0870741212719302	0.00618371625182635	0.00282309287191034	0.346030278249594	0.202556567917879	0.00502572476541966
2008208	8	0.895266677358154	0.0200886821172198	0.0107263167629683	0.0273373809473078	0.702860836589864	0.00600005935774183	0.567834845269451	0.934943983942775	0.368496726244351	0.46012729215646	0.210745440344673	0.0853435485665482	0.302356429774643	0.0766932831424435	0.00522927026478393	0.00210252897640794	0.314870180749425	0.222473824925344	0.00525936789304677
2008208	9	0.769166342068579	0.0178723933230589	0.00970278429382233	0.0212744117720348	0.60472645942511	0.00575775800071219	0.519837609620802	0.865425961770099	0.35234795667174	0.450823419497912	0.202370193352192	0.0828945968928634	0.317161378001071	0.0635535994428726	0.00525981415456973	0.00120697430133125	0.291343115840915	0.211400181389702	0.00605548110860865
2008208	10	0.640793609668165	0.0143388000189114	0.0102251843870816	0.018096302505819	0.558836202170404	0.00500462485765239	0.446019376730313	0.742417463734095	0.300459093852542	0.354815679648904	0.192998891643873	0.0677215717748617	0.303597349851562	0.0566602825017563	0.00622417954224074	0.000825272132293137	0.256091224622162	0.190342013260953	0.00705213265462886
2008208	11	0.581973739763969	0.0118594460249044	0.00991524848865442	0.0159698518521721	0.519351216741425	0.0051520911783819	0.378458104054878	0.697995637801973	0.250830698098261	0.285645311848031	0.181104972447084	0.0608843124071089	0.269513694262296	0.0512625973560241	0.00760549726397595	0.000784865753603026	0.259840438467484	0.181415094565022	0.0070391580164393
2008208	12	0.552448886834903	0.0103396909124305	0.00978286841202064	0.0144234380202772	0.571483378440279	0.00534457640429699	0.295305889662872	0.667052453212233	0.224615310327495	0.241145420045665	0.171845624690846	0.0480466708090033	0.23744435612499	0.0473027704909469	0.00868107895378934	0.000947152297114388	0.271120862266303	0.20459862021719	0.00728232878402093
2008208	13	0.538997458479699	0.00997970756481498	0.00987140932235522	0.0138776832349357	0.638970123933108	0.00559846429235531	0.259254299650082	0.684313754192521	0.202735649433559	0.217636222052075	0.200550424408683	0.0384507706391585	0.21642680456759	0.044389387356512	0.00924659268823986	0.00127565015128742	0.286283352916678	0.247313902146988	0.00828881335910951
2008208	14	0.551990026496872	0.00989381815241888	0.010141818578192	0.014091674030939	0.661085340748898	0.00562923237281438	0.234077260018667	0.720581236886232	0.183870058637496	0.194656589022053	0.25067635300871	0.0427885850402349	0.202195896025714	0.0420489096309872	0.00875726639090314	0.00176453038316459	0.310764979998731	0.305443198083438	0.00893450003832535
2008208	15	0.594348824121834	0.00989803530106744	0.0103361103364505	0.0172328695032805	0.690095967408492	0.00540083904805361	0.226217274022054	0.752746039598856	0.176062860263955	0.189422320284666	0.300691360561219	0.0632466836176905	0.196298416659341	0.0400555188826925	0.00831375340735104	0.00224636539821979	0.331052903334755	0.353767033928371	0.0107637887075453
2008208	16	0.644760774688851	0.00998840157109521	0.00980840967589515	0.0277925616784503	0.731930353935225	0.00500548255885932	0.219539504725525	0.787440981911455	0.18172487350979	0.187391213959016	0.345534210036676	0.082602112931842	0.201350574666531	0.0387504897375622	0.00817570223579157	0.00304970265256927	0.36127826838587	0.374256726456381	0.0102620036591153
2008208	17	0.692150490655335	0.0105063411593635	0.00832133275320757	0.0454734253502089	0.773847462983563	0.00457855442673486	0.21660803269951	0.812121089739985	0.197439741243285	0.189213213492277	0.359717043613625	0.0903880780391172	0.194132123116616	0.0381050990358793	0.00810251981076309	0.00446656682177396	0.408962213554066	0.390505252624635	0.0089389569101959
2008208	18	0.715448644451171	0.0123509995118384	0.00726919087916959	0.0567817514052476	0.821670324105243	0.00425796498840493	0.210794280099206	0.835522830373235	0.205704216115778	0.202699706534091	0.360595961392644	0.0887329284822675	0.203622799324009	0.037879113619644	0.00813235175478096	0.00539821474511788	0.394216476162294	0.371411698349742	0.00832565914021115
2008208	19	0.768350358964865	0.0184823762748931	0.00736325974148828	0.0572529886811567	0.907613172771874	0.00441866166086144	0.222873302281373	0.855803775391814	0.198948456760985	0.225024737218011	0.35874931740235	0.0766395486715186	0.217134303095445	0.0384014716713708	0.00806243849901876	0.00594182966999814	0.330013919592107	0.356035600792042	0.0105466129303252
2008208	20	0.846955386771106	0.0285390264986351	0.00648853146722469	0.0465866428357125	0.951016338445598	0.00506025943187284	0.258159878892393	0.896397078097773	0.188342226629154	0.260029838899209	0.312400494657919	0.0547327356775834	0.210266666463967	0.0378622829393467	0.00770326503963094	0.0064932419192568	0.277328408118989	0.314411704622597	0.0280035861183896
2008208	21	0.890608758293715	0.0354723140965858	0.0058277074619886	0.0343624998509741	0.957285581961811	0.00659482650590025	0.299177969109005	0.944272574139667	0.171034862417755	0.300472986372894	0.296215450574929	0.036665657589687	0.180830538711054	0.0373297432227205	0.00783161351019015	0.00662730061470325	0.252399791818833	0.248560830243129	0.0774909942088691
2008208	22	0.920815391347929	0.0352809642819666	0.00593829950937267	0.029094551696449	0.915185104546742	0.00888559424556839	0.306882442147727	0.981087022971506	0.164448167678384	0.336927493883146	0.297512291348392	0.0245806404179175	0.210242084046093	0.0369997328192914	0.00784649505406592	0.00651767308997488	0.240490909262612	0.214677485173767	0.166512526446739
2008208	23	0.962707394942136	0.0277107762010489	0.00613340603503745	0.0281405543120879	0.830884720138227	0.00945902563793466	0.3664578638841	1.00334913994628	0.172263018846984	0.359652546517079	0.356072488596946	0.0166370553936593	0.296135603787421	0.0372754442505635	0.00791015331964036	0.00643285563264522	0.212285143912073	0.213216621334532	0.323026133059182
2008209	0	1.00785469919807	0.0181743052623469	0.00650955224890198	0.0288792895999477	0.715698553873575	0.00944265315968139	0.362067058347567	0.988964191649032	0.196799102430798	0.379984271611828	0.438158763898248	0.0159068297204511	0.349768341431096	0.0383473861909096	0.00831776786938459	0.006464507277285	0.195079765048913	0.212708535308195	0.44857916772159
2008209	1	1.03591316852083	0.0142520615085629	0.0074978665450429	0.030163566354724	0.602451291906671	0.00939665044276477	0.303075070108501	0.959223150715917	0.225199771454417	0.397968117979623	0.47057009484759	0.0213992674556903	0.418851532871923	0.0403761173438481	0.00899518417637719	0.00659611451913352	0.194776737999428	0.222596554366947	0.468794941054985
2008209	2	1.05231615078561	0.0133861619236956	0.00869164994044233	0.0305234642828742	0.524878179670983	0.00936383480408477	0.267850479560609	0.931020806357526	0.287701023207174	0.380231280196753	0.490688858239189	0.0256217185645726	0.533588917195799	0.0430656736456111	0.0100114624076524	0.00684185112704866	0.205536064788409	0.24476228334408	0.39567812931798
2008209	3	1.05753709677443	0.0133148470199048	0.00968470323068038	0.0300037130061174	0.477741029665223	0.00932686175168797	0.271385349033411	0.890229143132735	0.345209498121879	0.380553502904502	0.435190192128117	0.025404968269143	0.609260105461763	0.0458029669422257	0.0111244119382451	0.00710611928843417	0.221401639496565	0.281170754351598	0.340162293702692
2008209	4	1.0260814450595	0.0139668485478245	0.0111333286075583	0.027527895631874	0.458247865549245	0.00910344162923963	0.296346575268284	0.8246494755856	0.38376558650753	0.42794523105272	0.485373981136248	0.0231054916827686	0.632398571402949	0.0476118022889906	0.0119232096549999	0.00728488085718498	0.215478234223037	0.299974755662419	0.234065117249746
2008209	5	0.991357167769036	0.0147017859791982	0.0125327585108468	0.0233169791387585	0.443863432934994	0.00899084839630548	0.364864613419264	0.759924206461702	0.415632630894759	0.417205959900427	0.540456474141587	0.0221974303819712	0.622859793347106	0.0456650831271364	0.0121403459862691	0.00734292056814031	0.198952666648931	0.307138785269122	0.158040342397097
2008209	6	0.940532659067204	0.0153277507305401	0.0139532360212291	0.0189593133700914	0.462421483603977	0.00923174219436077	0.442343434228835	0.714170443562253	0.448818479931083	0.396443336523691	0.330104538243122	0.0216738516108267	0.572463204609643	0.0667945791198399	0.0118815203190347	0.00751323645080054	0.174990203390622	0.296890169922755	0.073049725279288
2008209	7	0.857569526055662	0.0157674928386172	0.0174563673344833	0.0152508392487084	0.465747776581948	0.00947715506324727	0.457179919764013	0.669813263079562	0.452938533861902	0.391282305865784	0.248656387609462	0.0208354154637848	0.39096364520268	0.0775985094377074	0.0115090655794777	0.00739042068187748	0.15448936150311	0.313840672144749	0.0294524043632349
2008209	8	0.703263011084473	0.015541621009906	0.0294026389223959	0.0132973325222795	0.426116262699939	0.00947808437867919	0.44135822812234	0.608449593358907	0.426764898519145	0.371092353057329	0.220141130048083	0.020187140456771	0.294959885990228	0.0769405550771477	0.0111114509259473	0.00768860107990133	0.141624732447769	0.298829159794998	0.0116932858398409
2008209	9	0.60096398404063	0.0139903357369286	0.0478781054248003	0.0127913054443432	0.379331428911945	0.0092476828429716	0.443816236127959	0.568446862657995	0.347192484572877	0.319088477041906	0.194788107803488	0.0206947665418474	0.259226477662691	0.0641068644084898	0.0118773289875628	0.00773283310295029	0.12163105180892	0.359475313045713	0.0077624383967273
2008209	10	0.526789339960083	0.0131743817967702	0.0620078853993416	0.0130201914281091	0.309668962699759	0.00920255378792529	0.388784485826872	0.545600326976307	0.252354470811445	0.256375855474202	0.184834566897596	0.0255180276339324	0.224413505572633	0.0533036650423619	0.012342834296989	0.00738693029715971	0.108085456270651	0.399355343819567	0.0107785669701327
2008209	11	0.485013240659487	0.0140320527868476	0.0737457614946569	0.0132623200427228	0.304101570090931	0.00937296829744187	0.314745075986378	0.522638329402283	0.190443601559383	0.216276421911679	0.193518294581	0.0287338068353296	0.189453310038419	0.0416247556293004	0.0117092595954224	0.00684845514650913	0.108393448238443	0.479810151993396	0.0146420301318813
2008209	12	0.483662148553411	0.0145722417037025	0.0813787773611746	0.0131703605232178	0.337268031926125	0.00936016955503662	0.284630632126549	0.50059197069013	0.160997587690217	0.202522211613253	0.201174453650364	0.0271233823884537	0.171122180412498	0.0340947557557401	0.0111773347201631	0.00639930686468552	0.116856525722894	0.683851460743084	0.0145799546110054
2008209	13	0.484996124397562	0.0129411076164569	0.0506607782279622	0.0122318698141337	0.377819536325283	0.00931634157891017	0.285260198270266	0.503331829102015	0.150038960054655	0.192928882776574	0.202483666275069	0.0168954636776282	0.148562258014239	0.0289155060516415	0.010392474853309	0.00614277744197265	0.118298057843609	1.0117912200335	0.0126800561323734
2008209	14	0.502014869542642	0.0114937679690732	0.0396047010121517	0.0104214508615323	0.436966222506726	0.00930149604914821	0.281630542627631	0.533617350272103	0.149080251500024	0.195243963250658	0.189893340812681	0.0108062296328201	0.147673427003895	0.0278488492867277	0.00977415715460025	0.00609892995425447	0.119879521237632	1.28789759665739	0.0135789552536113
2008209	15	0.532624685677671	0.0107358338215326	0.0122204963429201	0.00884500716029508	0.520585176952288	0.00930872593693826	0.275476784333997	0.593210577506788	0.15051546872884	0.205610502057743	0.171938256133159	0.0094586299807786	0.167970995173553	0.0283107962256943	0.00876278235957638	0.00631192929695587	0.128470724230374	1.47817241978343	0.0167619191311996
2008209	16	0.590003487088562	0.0107868528829561	0.00829064921046721	0.00780457325062151	0.571442006173428	0.00921291182526724	0.265320575223659	0.665007212234511	0.154721049078009	0.216003248074333	0.172305635954477	0.00721345064529852	0.188476998788897	0.0294212212978956	0.007392138405684	0.00691807149976679	0.155723606875014	1.792533950659	0.0183889504773657
2008209	17	0.636221093488007	0.0106230094716513	0.00431094443642022	0.00718837684445949	0.598535575987972	0.00920928492076871	0.253720164681083	0.711297937371526	0.158528106512928	0.220437626734377	0.186447049864829	0.00654892560851584	0.173027822809858	0.030078285516463	0.0068840710125029	0.00777072248651327	0.195130739422645	2.0944773455114	0.018494059622464
2008209	18	0.687403785826416	0.0105238252480773	0.00726291960912715	0.0063136459804844	0.598167967065851	0.00927098165123783	0.245591954924433	0.721919826623477	0.167914933099885	0.225999554737774	0.193577384147401	0.0059447426838984	0.102464255271399	0.030324527753993	0.00703651480687066	0.00835022690511691	0.22504691013955	2.54310630380425	0.0193832003432033
2008209	19	0.766664231610216	0.00960038714651602	0.0137525529916753	0.00540270747842437	0.611148975227598	0.00925938921320229	0.249591067827111	0.706195724783738	0.193482503128907	0.239925790168277	0.181091476409839	0.00547573044031429	0.151288069684347	0.031174578923417	0.00918034771046917	0.00822971512593895	0.259099379932601	2.74642432812735	0.0228210928756149
2008209	20	0.850485466897112	0.00777134322523788	0.015841539354153	0.00510456303332193	0.635129584019141	0.00917329753289261	0.250619284306995	0.685603706828151	0.214784744952373	0.25569223627847	0.180774557378116	0.00557732794909469	0.196918524633738	0.0307478392719753	0.0115442598902603	0.00757427561902143	0.288658666392679	3.04551129063071	0.0366579666940598
2008209	21	0.876372040564826	0.00649615202553215	0.0200926456912558	0.00545749680884495	0.566780908264164	0.0085015853100126	0.262125401701957	0.692845653359364	0.225139073081171	0.260981045712881	0.185054265460358	0.00576097782801407	0.219401129220049	0.0300722243501302	0.0125019862124845	0.00671898952628359	0.299977973318083	3.41402075069094	0.0647492314411605
2008209	22	0.840991979936113	0.00603756516584266	0.022979875954467	0.00612790060946399	0.425536087127144	0.00691233166805668	0.275190217835161	0.688217159401413	0.218931922964099	0.267207617299853	0.173549239934913	0.0064758018736659	0.19336114387099	0.0300658167355797	0.0127018165873652	0.0062788553142756	0.274007372519078	3.84609210357592	0.110233040999569
2008209	23	0.842518877728318	0.00532241192840543	0.0246440003472508	0.00773621002777009	0.31264783414126	0.00588085620388916	0.293861957924358	0.622313631497634	0.22489781917218	0.289423677856142	0.149426381238893	0.0100495429072487	0.151352508252253	0.0301685392500816	0.0133421405110985	0.00604754632840289	0.214909195622327	4.18264281220309	0.177878878794306
2008210	0	0.800599290440374	0.00499465622395444	0.0253463821705079	0.0100566140896636	0.23715860445163	0.00571766258732332	0.321835482636564	0.510128499742818	0.24395654347749	0.314066661449391	0.131942691201797	0.0129371732977673	0.121183497759847	0.03044090619692	0.015483033339146	0.00593190413547034	0.178971828469274	4.42227113920634	0.231331309600972
2008210	1	0.733786329646713	0.00498071005471257	0.024742606849695	0.0121721608729417	0.203064299928267	0.00571645913119124	0.345917319224971	0.44596906439715	0.270582497104892	0.332151868968685	0.114769928528615	0.0141105080291945	0.109767113486197	0.0312586173842429	0.0187491599420651	0.00593643613368402	0.157773434070078	4.41414102010312	0.282951171085831
2008210	2	0.687810230544643	0.00517477568445331	0.0226010743661709	0.0147348729306185	0.20602896368911	0.00582647582628303	0.375881311896745	0.421045369977289	0.306551888677659	0.358060504791109	0.112553202710039	0.0137453075868814	0.120670697954497	0.0327195347018231	0.0227094734761256	0.00598252057747415	0.142233488574616	3.61137835432168	0.342358461251715
2008210	3	0.664810095604004	0.0054197412195612	0.0189976943199818	0.018734998792181	0.220813851034957	0.00590810926537785	0.402078571307705	0.412088541790677	0.332837113503515	0.375648837936499	0.10903386163894	0.0121487786999816	0.157968831790183	0.0353539169542539	0.0274951723164248	0.00604930578900128	0.141828573573998	3.36284314890907	0.429977360102509
2008210	4	0.679410573382975	0.00556666762694172	0.0148546102774676	0.0246125510739003	0.237511075959623	0.00595597312488826	0.425249455496951	0.408830608141728	0.341995644466782	0.379821083121371	0.107453413360019	0.0109192403731751	0.215306963743226	0.0398385932032249	0.0326462830492073	0.00611747412494886	0.151055311597507	2.56068636697609	0.564618940906481
2008210	5	0.660677447513995	0.00606800223764033	0.0124690536036961	0.0300304965285103	0.25102648315619	0.00597077632189593	0.450515026696575	0.401440374749699	0.348524970543504	0.36439600962575	0.109190958290231	0.0109654947541763	0.283660552597016	0.0459649108376277	0.0371740881547479	0.00625136549621774	0.160034628595403	2.18660275993858	0.480341235073807
2008210	6	0.585671856986621	0.00706001329114071	0.00807792438768023	0.0310335982792884	0.246773493450718	0.00593435875099696	0.469939399236784	0.402099267625083	0.360099162974376	0.349561398627132	0.118365966717705	0.0108935537053607	0.46115875854665	0.0525795077160971	0.0381446601215209	0.00600474886380192	0.147768995229319	1.36291532872386	0.236403703178431
2008210	7	0.531308252243377	0.00780802686149175	0.00481240564350843	0.0287282504532357	0.23443980140376	0.00601462648766889	0.460752102638518	0.381263560914907	0.375171411669857	0.304395905153269	0.136935684987031	0.0114211563617456	0.644132049809781	0.363060808088119	0.0382833568610794	0.00604579084167381	0.135820872797256	1.07661181144427	0.183643952972884
2008210	8	0.489079203624374	0.00807707566081235	0.00526963506542704	0.0250020314402067	0.236755010191358	0.00618014768740171	0.41830010149182	0.370732937647302	0.396680642914261	0.232933726143208	0.153440321918914	0.0132869291749063	0.529513125223782	0.243199152775687	0.0415294126879348	0.00647440621065014	0.12449928260972	0.959012586688835	0.120472127328965
2008210	9	0.396364498005972	0.00805442553161215	0.00691191089893542	0.0226451372912045	0.247152279349626	0.00648773268761433	0.322880038810552	0.354172398616837	0.40128942567703	0.168119782648731	0.165053258485734	0.0151608970790519	0.415898101798624	0.16851027275433	0.0416373095505752	0.00688943033370086	0.109684433101769	0.911444985921136	0.0891120244129224
2008210	10	0.318768493897504	0.00796162849851585	0.00829222227681182	0.0310149073624086	0.248264522559684	0.00686013334116534	0.282678236110151	0.335314861233611	0.381698781981964	0.145155507067047	0.142700174903531	0.0164601870038929	0.286469886046994	0.136717344722011	0.038436877945586	0.00938407757822211	0.0934623461484471	1.06658026185488	0.0651167699709259
2008210	11	0.278969477944253	0.00766550864724123	0.00961677345996011	0.040963733276257	0.251146528343242	0.00658174166535974	0.240325414657311	0.334153074570275	0.352181401817476	0.134033264425411	0.126291994503981	0.0163619403495177	0.23905947711183	0.120461000712715	0.0345853237617165	0.00948328048659903	0.0841206545932902	1.52581340754024	0.045064696788567
2008210	12	0.280385537970057	0.00735194327686691	0.0103245326235786	0.0401096696435707	0.259700854456169	0.00677967754464117	0.225158341247543	0.34820622926694	0.318810928925028	0.131414318118551	0.1125149613701	0.0114485056713676	0.206664543183048	0.112171639322305	0.0293232166414112	0.00940192328606571	0.0790702781665546	2.60338270014037	0.0298301896145185
2008210	13	0.298333570427373	0.00760090070652378	0.0109916343838069	0.0372196875269154	0.273828628424156	0.00747909785199815	0.222235230720906	0.353909222147644	0.324989708357587	0.14031687219601	0.0951171647646702	0.00643780022472045	0.192070593403237	0.112145473689054	0.0233002695693645	0.00942503146103677	0.0805878120238663	3.87102803049601	0.0220773904120598
2008210	14	0.338027960574004	0.0083353202753714	0.011610581629912	0.0329401611888512	0.296377901625242	0.00810621399277479	0.220953421967425	0.379163891604914	0.382974281445017	0.150452709178364	0.0773712052633383	0.00512896557155642	0.192945513955206	0.110810146512956	0.0174015289121497	0.00976327175069153	0.0867141398482932	4.65335189958607	0.0181413574389588
2008210	15	0.424102401722011	0.0090035803888079	0.0120163159793269	0.0280621424657272	0.319436872245523	0.00850618705530291	0.226965565684721	0.419505750731969	0.461523293155804	0.163236685433283	0.06977603042493	0.0054928742554513	0.201861367124831	0.11153510621433	0.0129253308306649	0.0103812912025253	0.0953754963151053	4.82099027981335	0.0163794386434501
2008210	16	0.513047061225539	0.00959100473902809	0.0124067764543714	0.0228081908496295	0.369579441909842	0.00912064006176468	0.226420761101213	0.446564016060812	0.523313765642858	0.174931180242451	0.071980326101174	0.00554224215044921	0.221860280270572	0.108637014658312	0.0100665627943949	0.0113515283154519	0.154432770053738	2.89232208411724	0.0176895386594459
2008210	17	0.593965722411518	0.0100937304629897	0.0122580103084989	0.0187218688636499	0.426584790663402	0.0100813605165279	0.226505175030817	0.492541582021488	0.560332998549896	0.180682743844704	0.0811186411402341	0.00560899663575508	0.289692478857595	0.104254807363466	0.00772067478735233	0.0123892729941182	0.363329198852856	2.39771136275013	0.0257536042402313
2008210	18	0.646374082389637	0.0111556588926126	0.0117249339996751	0.0165214307464513	0.484458647912923	0.0111988506336341	0.226236412951696	0.523342031878806	0.554714674040108	0.192232225762891	0.0883619277248446	0.00566859557773467	0.461451819814701	0.100658859472585	0.00578911138784576	0.0145639693345773	0.503076031692033	1.70500313159299	0.059284086122463
2008210	19	0.699755681972265	0.0127491487521372	0.0109690413220095	0.01450712189191	0.526776959761398	0.0132653880471605	0.262759223667331	0.560071740254838	0.657244703458402	0.216802315819121	0.0891680746426481	0.00521472808584533	0.756490646542388	0.095989901555651	0.00446365684411604	0.0142439959679722	0.53923085269485	1.69943332122798	0.138216668835531
2008210	20	0.797886889417747	0.0137844590327408	0.0101613081464306	0.0117858796098459	0.539327865112729	0.0147342670269121	0.301892710055961	0.614582646219383	0.808367629831316	0.246304942646384	0.0890296275583251	0.00517829908611913	1.04221426160796	0.0941013854782613	0.00399986653515717	0.013203533553397	0.500548434803657	2.23189379619501	0.259830438061223
2008210	21	0.855664458146224	0.0131643356704865	0.00963925100893453	0.00966229046336438	0.52169920442015	0.0141370981601276	0.307421690166632	0.630236055152643	0.792884743452143	0.26565837973142	0.0906763579269599	0.007403480321781	1.26553436040168	0.0945690445488172	0.00384648832063058	0.0123960931536551	0.419977366993535	2.77020616012812	0.401759576103916
2008210	22	0.850874469792318	0.0116515638478164	0.00923372173777018	0.00884507422340478	0.495909078511935	0.0132038252971876	0.296591051538602	0.64487872202269	0.44846523068932	0.268825981233592	0.0904318244764821	0.00985836379980138	1.56817071168744	0.0830624254288049	0.00399681171325182	0.0119303171110352	0.313360216866978	3.14837728711971	0.562880384824189
2008210	23	0.789679009700893	0.00947926944089036	0.00900432637474481	0.00905471033516093	0.479576919094936	0.0108569450733243	0.312743485859553	0.631332502112959	0.347443867627034	0.276806982631171	0.0854788750901244	0.0118120786700574	1.78013731998631	0.0465317621704515	0.00443897151160987	0.0117189703161099	0.206091569556461	3.23859612382449	0.723588789519739
2008211	0	0.729649407038974	0.00770680404152182	0.00903968904336113	0.00935616162670599	0.507005581970824	0.00835064585387054	0.347917043825249	0.594325457795009	0.458988113867699	0.316093115720192	0.0694684028120205	0.0172322437400992	1.88597875874096	0.0230688481240709	0.00479924931891053	0.011369589560134	0.169809230171761	2.25178159360921	0.823401426452219
2008211	1	0.689023682381802	0.00637415900726345	0.00931089794624572	0.0096756748225646	0.560256688352667	0.00642524369313436	0.397617888071664	0.564525629455033	0.508128836836384	0.355577149965198	0.0730575197271903	0.0242813998475416	2.29838459558851	0.0160077899133671	0.00523515669255002	0.0105842341881291	0.161071464191854	0.88784250829395	0.817461434533992
2008211	2	0.671822950777739	0.00561163393256337	0.00965132643029687	0.0101160145240851	0.590065634364109	0.00526853148836537	0.4319404159877	0.570306984811284	0.432894833849987	0.380083124059158	0.0855458206531648	0.0271378690161184	2.47268718233895	0.0129113963456878	0.0055866456655412	0.00948569951460233	0.181343644943261	0.52815488374552	0.679355878508806
2008211	3	0.647333515018863	0.00533361630923301	0.00982705539005609	0.0111978330418703	0.588602460992541	0.00480378718180943	0.458614669932878	0.607604923214372	0.416866740023441	0.38792126392924	0.093844675383659	0.0266460360459616	2.45879072391328	0.0108200977469406	0.00577448059025705	0.00832894253555829	0.251316342881366	0.385641556154043	0.574078571698798
2008211	4	0.637674465946001	0.00508987255643916	0.00971466108328859	0.0139479684911364	0.573914789524516	0.00451400772457115	0.48231387803079	0.643823918814748	0.442179697817195	0.382972696966634	0.104445071412293	0.0223075092813165	2.36572916816968	0.00998795826375722	0.00593529885156731	0.0072139063701509	0.341443222283027	0.312549001517612	0.544541387798773
2008211	5	0.647355457704324	0.0048723513535245	0.00940344518085053	0.0192528629732911	0.534070452793948	0.00427048028665609	0.522167256954337	0.639328327288238	0.441660704580905	0.373521497388003	0.110503138434005	0.0168802269643281	2.10316927874588	0.00939350395365179	0.0067140579521314	0.00622557840292598	0.374700202279118	0.292902501290839	0.477473359654316
2008211	6	0.630286523544954	0.0047721678892771	0.00895625318717064	0.0263356343027823	0.469448438308962	0.00417317239784481	0.509195914343868	0.639702755570371	0.43781509246845	0.342333696245144	0.112418631945762	0.0138799682556124	1.8332015972489	0.00942209073672393	0.00835523838183708	0.00510444982002128	0.339450609106946	0.273991341330196	0.348763548860616
2008211	7	0.656386776382343	0.00485912727189342	0.0133586433798304	0.0288994163109134	0.432901661761208	0.0040405910274801	0.443434757250252	0.626210643647311	0.425926039040675	0.300357397944811	0.10718908943787	0.0121378428814513	1.08295717537213	0.0101912240012721	0.00933671995083721	0.0084041497041134	0.294001995730948	0.244322591450925	0.219909833973887
2008211	8	0.6598766443695	0.00522007688402501	0.0256907799275993	0.0247490582230934	0.405040153250074	0.00457114066893215	0.418914895168162	0.602979464854215	0.385904208775693	0.260958372720979	0.101852773983723	0.010531516400159	0.452566460657706	0.0132661278543223	0.0101214941980055	0.013125240644876	0.264188200634809	0.230861565406318	0.156005617494662
2008211	9	0.620818049614621	0.00576989639605321	0.049215913310478	0.0262682640816338	0.394166685566503	0.0056992966474139	0.357626569064912	0.56969030013721	0.325698908036767	0.209347140445792	0.100941203809243	0.00878571306754937	0.256042552357719	0.0157983017375978	0.00862911756740982	0.011488566358053	0.272773380823067	0.230533340402193	0.078017058015029
2008211	10	0.611694490246618	0.00669825196429692	0.051399754580485	0.0243887510391779	0.433323410366429	0.00649511182730862	0.318917903038348	0.577792900177251	0.271035473741151	0.196794298550451	0.107360885373248	0.00712345609862401	0.202040413697199	0.0162721089678038	0.00545636385079301	0.014324171376872	0.31776873703817	0.229004775580519	0.0443010921172259
2008211	11	0.609189697418004	0.00723631723589447	0.0510275749953321	0.0225950201606699	0.549492847952484	0.00638469048739349	0.275947549842115	0.560941462391025	0.213754673678887	0.176030628448159	0.115181837580473	0.00691527140516843	0.213764377821923	0.015829859538616	0.00375274629819429	0.0158510537654911	0.320311389650616	0.24024071317	0.0759262017210559
2008211	12	0.641204643866576	0.00730972333811836	0.0491903928138448	0.0205020627238709	0.624313241492089	0.0065871860324702	0.253123648941582	0.58517391403008	0.163437683698239	0.175577375670467	0.120875693940102	0.00810226876148637	0.238667609493895	0.0169683153770931	0.00337689611214153	0.0166267068259915	0.258098615983902	0.269041256341176	0.0955841560477881
2008211	13	0.701115564903154	0.00790157405444385	0.0463881904579548	0.0180513640902241	0.633436164086297	0.00679303793487749	0.235642912316191	0.645710974343632	0.129903043909482	0.173436749815227	0.121447625788445	0.00907312664857159	0.255616798923305	0.0211755050019404	0.00327183043991024	0.0144758673228452	0.19833590196843	0.3103688151244	0.0956192794799143
2008211	14	0.783836904158993	0.00878865239184371	0.0445862104517679	0.0156734944108516	0.621729372575182	0.00741054470979698	0.223247265112252	0.737653399734014	0.118490419129187	0.179952959669565	0.123779762245447	0.00855200630743078	0.269923412373465	0.0282007946878359	0.00352252325932959	0.0125780877234711	0.15565293457659	0.360862732397279	0.0959596892482448
2008211	15	0.855061249794791	0.0099724231979339	0.0429544861520841	0.0138158305459191	0.599039490789569	0.00820012086267717	0.243884861642008	0.800129200939007	0.125708920652501	0.195894752499959	0.12660742259646	0.00804387640602888	0.301691795371486	0.0196385128128595	0.00394417888850367	0.01023908723545	0.141938398701024	0.403520823047989	0.0873438762376004
2008211	16	0.963622748987179	0.0108638163730448	0.0406474011870892	0.0127803280357282	0.588753665644587	0.00898614817289187	0.288192313474332	0.796917711366898	0.140643533337041	0.216366054863597	0.126461177828335	0.00814499732730275	0.318987542980108	0.0142118081603655	0.00410294028310334	0.00859912658280139	0.146011341565714	0.423970137478977	0.0867270810434518
2008211	17	1.09196207776478	0.0103359622309478	0.0376449907367528	0.0151673842559156	0.551567312439941	0.00853464737118126	0.353129122000575	0.761331603382087	0.149644905354205	0.251428425751991	0.108426654779776	0.00871883362008901	0.291066378484404	0.012647688601505	0.00412250793264459	0.0064828983261108	0.154239890315586	0.385845603972596	0.115002420577768
2008211	18	1.18769798224393	0.00921149647819292	0.0336371332489202	0.0284388827757921	0.556480107984904	0.00631480242936255	0.373477507264531	0.713046332635442	0.152324980023914	0.308787718321767	0.0906162486063742	0.0102966931939488	0.254696021766824	0.0120494815096626	0.00406121931267881	0.0047442386074573	0.158112618982975	0.312486451762173	0.189305370855414
2008211	19	1.27226180202177	0.00797784701211538	0.0266819232372447	0.0437321028891954	0.563266268274803	0.00531228726068646	0.359209050062603	0.668083460824926	0.176726248979769	0.353733108162169	0.0824016643574561	0.0129506243615739	0.245171729055677	0.00953032586468968	0.00401510480405811	0.00414444246620768	0.159953841006997	0.259576391543979	0.247083328489814
2008211	20	1.29613976782163	0.00719955214793289	0.0223315288936535	0.0425674733262812	0.591571728937955	0.00475508823507226	0.356535014587067	0.628987748445314	0.275813727300546	0.358165940148593	0.0805838135351045	0.0155437439628024	0.236407157475865	0.00878719690087527	0.00409360196304301	0.00388150311278629	0.168736324895196	0.218738758640558	0.265747378309607
2008211	21	1.18888995453516	0.00719168198828571	0.0194137036542397	0.0325234492823511	0.618835074153387	0.00442942868711818	0.367158600717103	0.616739017135317	0.489138032095493	0.336730107589857	0.0821537353263351	0.0176697353717006	0.209573551576059	0.00901398503850427	0.00426333898657548	0.00377701414265265	0.190385697332563	0.243856399243185	0.328087820474743
2008211	22	1.13631428722264	0.00793760172716175	0.0173263425012919	0.0231757700678831	0.607269596245943	0.00409680868070838	0.36559974225088	0.626146729560306	0.585120369582794	0.313362494510722	0.0839803163623306	0.018876677746414	0.25595105121278	0.0109346324088414	0.00441505626580174	0.00376499878802217	0.202504341179451	0.357337473721404	0.40023873972807
2008211	23	1.0950041926504	0.00818924001778131	0.0158928121158754	0.0175017474755705	0.571391782776456	0.00388986079948999	0.349613271496365	0.65272330116558	0.463583148351949	0.29026775584918	0.0878042261672771	0.0192586206931696	0.295834607249584	0.0139452630985674	0.00448727748548079	0.0037997961497232	0.193121059180075	0.539488268861289	0.421411404382715
2008212	0	1.0584184662954	0.00720931786905406	0.0147185795432504	0.0146842269636553	0.508148698981776	0.00373434177791605	0.337077736314709	0.673644346949359	0.360585652936399	0.281950267906467	0.0957544492769313	0.0192825079004404	0.338264087833973	0.0177551665105139	0.00452194528968921	0.0038397848899499	0.157694209863632	0.675856826707803	0.409868148366957
2008212	1	1.0118377007298	0.00626696317655226	0.0137991781164308	0.0126385715580282	0.424877475734539	0.00362965135338667	0.327594247262191	0.673939997463632	0.294534143899035	0.273491444007624	0.105699433315314	0.0189993299763587	0.406282664486443	0.023648878393048	0.00453977576328277	0.00381774440689214	0.123300898649981	0.678169150800752	0.384446559464027
2008212	2	0.967359927848267	0.00549923461164472	0.0176466414694815	0.0096962180615464	0.336357994135556	0.00360171221190457	0.334677734347939	0.642225750662105	0.247953748111534	0.284709582952924	0.118431603847469	0.0189939368686509	0.420044886465652	0.0265518739527716	0.00455837645145292	0.00372279642143843	0.0967907777940794	0.531369292624106	0.358594665662824
2008212	3	0.92178151455625	0.00506377901275114	0.0160470522212832	0.00722351158319033	0.286379320474903	0.00356839777274801	0.367948369560019	0.590941615357421	0.238396820337613	0.304232820231377	0.133644727541285	0.0178303466481033	0.591779116624057	0.0253633557395068	0.00457692751980116	0.0035817424034237	0.107460587935071	0.412571424993427	0.358891134626956
2008212	4	0.865717861590762	0.00483105385443062	0.0144633866873093	0.00556354683138381	0.260525764795998	0.00352354194317308	0.386266690335303	0.523848770208383	0.243092199601573	0.308869455565204	0.150427195365898	0.0220054120880197	0.599214542798748	0.0214086503524591	0.00455775522601296	0.00343098251060855	0.125310001596627	0.359604738934218	0.42838344314432
2008212	5	0.834196504300095	0.00466772099935907	0.0132934665946711	0.00463970284165471	0.236953031217267	0.0034599823719208	0.40084093115498	0.452548860276859	0.254187965384907	0.326155399730418	0.167864739260755	0.037034529919514	0.605568702966256	0.0195279799423611	0.00451681142349028	0.00327559693038745	0.148033001982114	0.337719216062153	0.574091052602282
2008212	6	0.778952525203095	0.00449469024519378	0.0128781917942629	0.00404553444163093	0.213175821820369	0.00336606419227257	0.40297354209214	0.397079370916193	0.281153115488846	0.31450886604026	0.18241721879341	0.0411821179056799	0.593410264526283	0.0230591319480183	0.00459851330531482	0.00326202769190913	0.14614096073101	0.344709907042373	0.696238221319846
2008212	7	0.680579241172965	0.00430447672129845	0.0133650731459256	0.00360164947625687	0.194753174215612	0.00349487932169154	0.386203843036654	0.367283290311939	0.289737127853636	0.286609039675837	0.187547381629863	0.031726802662356	0.453170702988855	0.034922193424857	0.00475058753528303	0.00409077348043173	0.112886811130387	0.347984615954502	0.892619150115597
2008212	8	0.597021988069474	0.00412548498970639	0.0234846195684054	0.0034293232547089	0.192882437534636	0.0038948712203093	0.358963245079438	0.355766345839748	0.275216158488462	0.26989855742426	0.183100055842525	0.019826460608664	0.361046462206968	0.0762141320848669	0.00493296392271766	0.00783273818050393	0.0779531939058892	0.321433441957704	0.669275538982094
2008212	9	0.499975208176305	0.00405629481381154	0.0295769903974887	0.00368642296210623	0.179526763812807	0.0054470020559313	0.301490111582973	0.357918592117463	0.24550530771447	0.237933972379093	0.17514225235506	0.0130103717695223	0.313643716854659	0.0826674357760432	0.00483001205185309	0.00837188837428224	0.0659780050072445	0.268774311519287	0.466626778278784
2008212	10	0.452072706512545	0.00435468937937871	0.0297156662727819	0.00459242161551452	0.169753068411739	0.00665798716340638	0.258343897681414	0.349116395611544	0.210068692816498	0.21070528494872	0.171135817304232	0.00940634458514166	0.261967004410137	0.0620815679914294	0.00451535127694297	0.0119643915497358	0.0503270940400555	0.214349403719692	0.281901573975665
2008212	11	0.430641698801757	0.00503633753432487	0.0290793514091949	0.00527371235240827	0.167581212224532	0.00732673624423631	0.237525619128497	0.35368647953651	0.171347426044314	0.194761066059698	0.167930464979537	0.00755018117333338	0.218947693079408	0.0535091054931038	0.00429626220798461	0.0118524739156179	0.0428557087521853	0.178112686855175	0.201834058423557
2008212	12	0.414916244341645	0.00558004706674513	0.0277294400356745	0.00587220001586913	0.172925396138328	0.00703640563448656	0.239225770612916	0.36117710873606	0.127394620450987	0.183018151308588	0.165911886393502	0.00649140362252645	0.191601894724312	0.0506037830129831	0.0038247278354101	0.0116973723744323	0.0430794776653351	0.166298233568479	0.167756268794812
2008212	13	0.416182050768138	0.00553516281826993	0.0259672849334825	0.00706813757045205	0.184010093106457	0.0066172148971691	0.235037270565455	0.363687361444998	0.10115487845911	0.1735027895869	0.16333713319575	0.00601202191877318	0.154478036688972	0.0514095640666202	0.00361757662349691	0.011217942894962	0.0480495791096338	0.191665189134533	0.149423417023636
2008212	14	0.425274727987531	0.00757102115979491	0.0233676931398401	0.00760291243746792	0.198654566008043	0.00629393517327054	0.237327983236929	0.364226790062811	0.083909679488829	0.172330656187509	0.154185000944651	0.00595482663248887	0.13185565014282	0.0552512380998146	0.00348266176468401	0.0107368376883095	0.0562357024948753	0.276360502693538	0.157531183639833
2008212	15	0.429196361555872	0.00909444850568342	0.020605946851493	0.00729661391388523	0.231076679280239	0.00601711586075571	0.239581130490485	0.373352917076295	0.0711801391986398	0.174852973399016	0.13885159753874	0.00640311254711584	0.123782059052614	0.0602368806455854	0.00341745302881015	0.0100068313228542	0.0681969455041431	0.495815973777431	0.148112537355684
2008212	16	0.440084971135048	0.00841948448501803	0.0176411316189544	0.00720771441318308	0.27523773269449	0.00583468267017099	0.235997024414957	0.380323821578607	0.064164602537025	0.17953575782467	0.119521314773845	0.00723481474808331	0.121015104838906	0.0647004335184942	0.00339740315227494	0.00882112654044688	0.0812132863971917	0.619304741692008	0.123988248337475
2008212	17	0.470439999529287	0.00684752521108949	0.0147124627518769	0.0070619759719264	0.34027735806134	0.00582170578042282	0.227819643871061	0.387100520480965	0.0695803137672057	0.182540691946985	0.105557325734802	0.00778221891993505	0.123421207716728	0.0665896086572509	0.0034030353901837	0.00664664896973707	0.0877627109750149	0.661319004070309	0.106114947219412
2008212	18	0.49480876934486	0.00530392659175519	0.0122953708047284	0.00756440758719046	0.430571066012908	0.00579460165324424	0.219317966148765	0.411723069465818	0.088371878141958	0.191864486992108	0.101275357129324	0.00860235460272643	0.126443820300247	0.0657495017040046	0.00340874445064022	0.00446772827863167	0.0826966844792194	0.674454290229821	0.0963522222653344
2008212	19	0.524938373738924	0.00430431970154198	0.00966491754226008	0.00992044141350207	0.535788290322168	0.00510564484468229	0.222769420838585	0.45608709836328	0.13067743039819	0.21102685454205	0.0983156753698503	0.00975837382743155	0.0999718291531398	0.0625486211236518	0.00338491903907375	0.00359115767710396	0.0765698261762101	0.651832024776181	0.0940101884098012
2008212	20	0.57505988561807	0.00407888684452721	0.00748933436866194	0.014022893853913	0.6100072243754	0.00457453964967659	0.23912910662652	0.534216982142852	0.207512199086164	0.23422196066996	0.0937341577174318	0.0106432047006174	0.162348511980262	0.0577420145616273	0.00339386883494469	0.0031606099807886	0.0758210221698373	0.533535825420833	0.100256650106276
2008212	21	0.635450907959209	0.00446732341842256	0.00610416080299096	0.0137641825869272	0.629658138483715	0.00424427788861481	0.260202122444036	0.619167586604417	0.260515788260712	0.243932765015519	0.0938078577746726	0.0114158288955223	0.269658802352434	0.0550305201455747	0.0034076036874382	0.0029989449281257	0.0755266712871654	0.3396649327697	0.100132209400847
2008212	22	0.691659958715554	0.00492084484844147	0.00563604115330889	0.00588980469631847	0.593472961638305	0.00415940381138509	0.279477533387834	0.697295995966213	0.272056491220156	0.247036686364174	0.0955495520281696	0.0118060519614333	0.444246328217752	0.0549985403443994	0.00345918892080181	0.00294609119546898	0.0775751931871038	0.292450969641057	0.0876800321732328
2008212	23	0.720049602255459	0.00513814480987096	0.00519941058289731	0.00323013402358877	0.490127895096483	0.00417125448521618	0.354761712889113	0.74405925266048	0.312851729706093	0.26773613052797	0.100200559347595	0.0120349621611675	0.714118519333484	0.0625964149936808	0.00357217934652538	0.00299119024661406	0.083555370384277	0.375408565791459	0.0787671244410588
2008213	0	0.740017064756934	0.00527746048084569	0.0047590767590591	0.00304193913807753	0.36264330733572	0.00413406393431646	0.409688517734433	0.73676938558754	0.371091184018164	0.287062265589531	0.109754002023573	0.0125241598454018	0.912119197402359	0.0888655953265627	0.00366053425520478	0.00317589163138778	0.0953364870395281	0.512357601633532	0.0716731543494425
2008213	1	0.774514127774898	0.00519411280239871	0.00449737759043779	0.00301159258702564	0.282116439906456	0.00409787665566719	0.415725345743924	0.672380268956453	0.409952909084774	0.307836981473866	0.119790427913248	0.0128862052960874	1.19286835449278	0.143812650090072	0.00367084602280513	0.00346024559026412	0.103434254758244	0.602832204824069	0.0649362402811021
2008213	2	0.813991996126393	0.00489565179708944	0.00452836951457695	0.00310074064985263	0.243370406992079	0.00409927767948481	0.422656491659649	0.564626715393908	0.432892782234774	0.341483191153967	0.13050454713184	0.0131906380303533	1.38408949811045	0.203546282775503	0.00359852635601063	0.00383666671404303	0.109600583665829	0.655323742190313	0.0609192603305628
2008213	3	0.836808024384369	0.00439626138282954	0.00443238316888323	0.00334399477752116	0.223693100806404	0.00407749689579358	0.436329597208913	0.479412779786774	0.42934856818344	0.358932806359661	0.13684486244606	0.0131718050082885	1.51236871749228	0.233273196819506	0.00332977783771073	0.00425716596842738	0.111003061685714	0.702514041386268	0.0597238545066643
2008213	4	0.818919802414996	0.00392584671889888	0.00419478285668827	0.00359777708255684	0.207941984233684	0.00387251788021921	0.442408014933152	0.440913540374236	0.416407422992175	0.37316254500465	0.134402930637369	0.0133567375073805	1.59676212755547	0.251310965967114	0.0029380223166736	0.0046000723556025	0.112825578336706	0.736586389465058	0.0550119720893314
2008213	5	0.785112725523236	0.00358414971735626	0.00413647355297261	0.00353337546442957	0.204074036367619	0.00353811252107373	0.45238169159222	0.425650622525282	0.422029567681967	0.379130768387209	0.122689929667677	0.0107755124880213	1.57010660091564	0.337923260742572	0.00263585624556743	0.00462345588659931	0.113443965983177	0.734653375793916	0.0466233263247294
2008213	6	0.692885522914375	0.00336660713965921	0.00472301235398104	0.00331277045084814	0.208649876962673	0.00314101161502281	0.464723714968132	0.423083578090883	0.429355320399816	0.381620655613525	0.11016618053642	0.00857782202903327	1.4574933735893	0.581825625547391	0.00248719469778151	0.00497021464520211	0.11245556706536	0.713291696738117	0.037769263921977
2008213	7	0.648809901345715	0.0032416949932396	0.00556956419053107	0.00305115775879081	0.208511325375488	0.00339332522232517	0.463640687010126	0.41598942758447	0.446798661035639	0.353750295962419	0.0992893535862036	0.00678179194582005	1.65470848951531	0.483163238996126	0.00254690589890255	0.00486663677677977	0.110336144182007	0.635473504326282	0.0310583390018955
2008213	8	0.640109003993335	0.00330650805030234	0.00738403261552168	0.00295997962980805	0.214145750520346	0.0034767779899022	0.385542000792885	0.40610079967731	0.404400487668429	0.336452685250889	0.0944993612540787	0.00684985538926273	0.881342397082868	0.297058121871179	0.00380045458607958	0.00539179173938626	0.0989690704426539	0.481637724052601	0.0287402867306897
2008213	9	0.590185678896296	0.00344138572249424	0.0144793081881848	0.00333604294485984	0.20915139317112	0.00423990563909627	0.305364777046513	0.389262253212323	0.343235105352109	0.256583674037979	0.0921784741457548	0.00864421506976875	0.472565134545188	0.244155804670284	0.00400343125624908	0.00552001973068076	0.0733881364345484	0.41538988387729	0.0257423066766728
2008213	10	0.521127198813968	0.00428328002583759	0.0210667282932879	0.00384548762225191	0.19421732642521	0.00473746694593346	0.2449538774249	0.345373556496045	0.271560977794358	0.197961743044061	0.0864534990592301	0.0134151248163978	0.307620417497731	0.20973373248162	0.00392474425475247	0.00585694047146505	0.0645204186787161	0.353043848986774	0.0233770180351496
2008213	11	0.498631922232506	0.00481179976155695	0.0211365560126305	0.00610737913946259	0.195804478878627	0.00488281958453686	0.218943296849019	0.370686502882719	0.204333225799676	0.169567499916173	0.0750269124974037	0.0200101966926837	0.224189251084247	0.177398244782391	0.003587844940936	0.00589429109336733	0.0633460171019563	0.320293437874588	0.021594386974247
2008213	12	0.466965869964214	0.00481916535024379	0.0221017246868425	0.00808414597703838	0.197477065668902	0.00507388980110707	0.211285812263296	0.385376199623709	0.157960860468463	0.160064872748992	0.0630941788389299	0.0212093179510618	0.1847069574134	0.14290361029469	0.00316394008187056	0.00596031188916961	0.0652865531170826	0.307056656004685	0.0205210550311368
2008213	13	0.484354568847632	0.00464139425825353	0.021986302336454	0.00890026721015136	0.204722719311561	0.00506156243622767	0.209101423185594	0.37527896204057	0.136039023141312	0.157119197013252	0.0552030295595	0.0204696427492872	0.149617345668358	0.11033521944272	0.00281716778774836	0.00608167660756942	0.0667654078169341	0.353358902231798	0.0193749837428605
2008213	14	0.523578649659626	0.00452862474932769	0.0214034085299731	0.00814623775117847	0.22512538890391	0.00496481826175734	0.208546030181391	0.383732026631333	0.122334247643004	0.162471097059409	0.0511445987446423	0.0196898033218685	0.122096480949801	0.08221393733955	0.00253580334478951	0.00576055694504687	0.0683112101609717	0.45471650486978	0.0185230156246288
2008213	15	0.575828039555736	0.00433771336057239	0.0207795936052923	0.00707908994323313	0.261898996178453	0.00492074088136129	0.211333686151069	0.409806956745703	0.112621601688996	0.169011061182156	0.0495473034610395	0.01699175784388	0.105944954707682	0.0648134031985361	0.00234124322666674	0.00535412831124578	0.0718581422670278	0.759781817640745	0.0171777243080225
2008213	16	0.636375971798844	0.00416968493287605	0.0197669947093256	0.00582546107843024	0.314337711226614	0.00486476625837291	0.214110336142256	0.434093022006885	0.113457255279839	0.172383438708344	0.0492467016619873	0.0137978722886447	0.108173635308297	0.0548971568579206	0.00219759205051502	0.00486373820102566	0.0787016066741044	1.15799036443841	0.0156377358140388
2008213	17	0.691616661911368	0.00405889610624586	0.018357400961916	0.00434363190386021	0.404899536094075	0.00442799183904948	0.21104380477356	0.450371255847153	0.122914814876952	0.173021226666354	0.0504957887651893	0.0122228989501606	0.119268848815719	0.0486274631760996	0.00210611991588581	0.00419685151637399	0.087453746030083	1.21364910342538	0.0137719154948903
2008213	18	0.738352577017729	0.0040432248849971	0.0169137150916973	0.00318400431096702	0.528271212741341	0.00377498775913794	0.217627904775173	0.48528993130942	0.14448473485114	0.184351651887095	0.0517613871936562	0.0121000462984456	0.136035050176523	0.0449223121274256	0.00203105012950542	0.00361757995700481	0.0941770760410773	0.959275898655179	0.0119030515243031
2008213	19	0.776436844277946	0.00397609131562462	0.01436383185997	0.00302964085016936	0.590756198293056	0.00331596168056596	0.239410253786385	0.550495405605722	0.180264884243869	0.207736328202186	0.0542963141800087	0.0122814602434788	0.123850049502396	0.0409971121504349	0.00190414632135551	0.00318028672277113	0.100107253542783	0.976906288354937	0.0104189523607282
2008213	20	0.800700497841353	0.0038592526650024	0.0122587391141607	0.00394446206438385	0.616883620214549	0.00305837391056473	0.263592149596539	0.646706252660333	0.2000467423547	0.242690108303331	0.0588553665894903	0.0125673887637868	0.226523471460358	0.0369904768111319	0.00187407032534028	0.00283407796772822	0.105502438804157	1.03277829749172	0.0091299662439585
2008213	21	0.87305639224802	0.0035888463810962	0.010528889404624	0.00484572735277029	0.629045676858676	0.00287337314094782	0.291904023186331	0.679265410671088	0.237499848630612	0.265917917349624	0.0655895949902324	0.0185299361847233	0.34560754575121	0.0344903866964516	0.00186516535728668	0.00258305100369424	0.115901456103219	1.10906385195771	0.0082702603605344
2008213	22	0.86904750839132	0.00322590560325121	0.00914509689448612	0.00411726843623842	0.567236559411219	0.00274773678196233	0.319949813225133	0.686232843115875	0.289017574290962	0.293931453211643	0.0738633714793072	0.0374205570815914	0.528753575230087	0.0332272074417786	0.00185160268563335	0.00242969454764531	0.117955201717774	1.1290154486125	0.00769424917826113
2008213	23	0.859774996025547	0.00282173881405697	0.00809061015416957	0.00294952936636649	0.468915115808818	0.00271266170013339	0.338981338407115	0.692071706517143	0.317229333647347	0.327860456797916	0.0852477796318747	0.0756586244602969	0.704558313875564	0.032497378271539	0.00164382107304822	0.00235132045954952	0.103849378203064	1.21421611208742	0.0073400816255358
2008214	0	0.841444041737036	0.00254660334145817	0.0103586995469171	0.00259772648805111	0.332288887960782	0.00271322309366327	0.351725211100552	0.682512988217676	0.315140440813331	0.352971389839203	0.102921195202391	0.117083521075136	0.832861714736479	0.0324205548257828	0.00153976472215945	0.00230323256959965	0.0758833626194281	1.02886933164509	0.00749030023865042
2008214	1	0.816582400337068	0.00246163054571153	0.00956668307062838	0.0024690482857527	0.239971752386759	0.00276146867106396	0.370695427901306	0.633610844628628	0.32404387050289	0.370170150602899	0.126831030781007	0.114510553056072	0.909146830843007	0.033098449555894	0.00170622587140476	0.00227149799663533	0.0598145580807547	0.76784938052825	0.00777069464543566
2008214	2	0.825664046930099	0.00239843655462296	0.00894029123256504	0.00235114123915092	0.201967335077937	0.00285092661251446	0.390431277558278	0.535402373096134	0.376207393623402	0.38432697810663	0.154260077745178	0.0976153184733298	0.982029091116675	0.0352079930679611	0.00217336037864191	0.00224241094073457	0.0625706211907077	0.59288408623599	0.00733979394935112
2008214	3	0.803720524315437	0.00233009400130252	0.00827814546036107	0.00225819047531344	0.199037620064154	0.00293286215556332	0.412708375803707	0.490083511129672	0.442924496730289	0.394249467711988	0.197153730849563	0.0984479227047459	1.06139323259926	0.0392666539783518	0.00247062205366118	0.00217159620013353	0.0635988536532035	0.496624170128809	0.00643767236009535
2008214	4	0.822716234428113	0.00225748790786835	0.00756775187271846	0.00225503691018891	0.1990849756047	0.00303120033641644	0.442652503072386	0.482454798829528	0.478397981020635	0.406898325697623	0.260721690251098	0.105084680848127	1.18617845498277	0.0464450750783659	0.00260642181634927	0.00209037923846411	0.0631668914501728	0.4587063273195	0.00564583761795437
2008214	5	0.787950668572018	0.00219309992499913	0.00762098765977718	0.00225560390327965	0.189805440049804	0.0031861273011668	0.503018171351619	0.472633983583654	0.534985835096051	0.403360797077781	0.292684843426797	0.106198983894937	1.28340723833119	0.0756783219089588	0.00270882489088842	0.00205289658843303	0.076169907748566	0.437847904764027	0.00527677862167807
2008214	6	0.733018948858426	0.00215200896776783	0.00705704027818248	0.00221920981950688	0.184415586104	0.00340047528540541	0.518334407571098	0.444305319108723	0.613858386580541	0.413772008774864	0.314449531876824	0.102022051092272	1.40830322433514	0.141013950260852	0.00276542115130517	0.00232600891117827	0.0918565750795059	0.404474858398504	0.00855229332508051
2008214	7	0.610369149223562	0.0023748055495184	0.00674224383501755	0.002251477756143	0.171267171499194	0.00364291752223561	0.549342550678791	0.416717506285045	0.641787008529266	0.387740190608636	0.325848063541821	0.0940857184996272	1.28970153257845	0.190554347061264	0.00277141090824389	0.00258033725166207	0.0816854730865141	0.360221444205642	0.0154010699595531
2008214	8	0.526946628043052	0.00270560108940759	0.00623876357491416	0.00242093808414769	0.161334380912548	0.00361883560733438	0.565543866079867	0.398674667768534	0.549304000837656	0.328563896675761	0.3367337597147	0.0966606588264907	0.713972642814508	0.19692448659892	0.00258489523826077	0.00328722620078435	0.0476612722459078	0.268512298024276	0.0257102268520954
2008214	9	0.50438654350101	0.00338860136947504	0.0070861133007552	0.0028836293972033	0.152168966857793	0.00372209974894353	0.484340865495975	0.383505469595245	0.494555619158452	0.259752134648169	0.33236730076585	0.123169708275965	0.295912060119345	0.174084043148876	0.00249828857136779	0.00411868335144574	0.0253348908974376	0.218832498331224	0.10197350666254
2008214	10	0.408475429914103	0.00423401644112052	0.0110493423808178	0.00354701993533878	0.140358306084407	0.00403419466785112	0.37293217008477	0.339224157356556	0.411263106245914	0.205857410102587	0.315460945177658	0.184268797824487	0.206526271763855	0.152597510257075	0.00246830013172436	0.00441105087250138	0.0171446638659937	0.2049023613482	0.16101522924072
2008214	11	0.373327808545513	0.00672473742247017	0.0147302467988297	0.00446061383641738	0.12412231876959	0.0042532127681935	0.301522344905305	0.294875074369475	0.290519692007144	0.160505085204995	0.307639612708039	0.206587308738331	0.206930744821289	0.096341243408854	0.00240278912174005	0.00462837952103652	0.0157661315300962	0.173723672717836	0.174897401504807
2008214	12	0.394895200246271	0.00727501596312118	0.0178407697316382	0.00733957003468979	0.129041083293219	0.00540573342161107	0.258622989348744	0.292030531023052	0.221939458596666	0.139763374902564	0.286887875200861	0.0983987703952349	0.20033690144392	0.0823339376105234	0.00231280313467559	0.00432577465279337	0.015679867878728	0.166617238326893	0.266428647735307
2008214	13	0.388967075296036	0.00594868159587018	0.0147528118179524	0.00952500896542126	0.127677612156639	0.00569822073079367	0.258031286130292	0.295534605934846	0.171102875253655	0.139985737306773	0.280953866377794	0.0130788611600634	0.188848845269467	0.0881024910822624	0.00219811558046633	0.00494734514003336	0.0157504949290062	0.195753517481232	0.398303415812046
2008214	14	0.418668887248375	0.00533933167270621	0.015371491340788	0.00978793743023625	0.131666856968003	0.00586097476370968	0.2530824768171	0.297257976851612	0.149735702133486	0.149174921450091	0.269842905029997	0.000769183231138175	0.178337119100305	0.0994801910287687	0.00210636401613637	0.0052702877437956	0.0171601066652455	0.250405051870162	0.627587400590724
2008214	15	0.568071069831894	0.00527318677303017	0.0172968147756606	0.00917844432166126	0.138590785839169	0.00607010139564346	0.241026726538728	0.319160961638295	0.159449971292909	0.153491832734145	0.256298634045036	0.000523270349254493	0.170985803026362	0.116373493221673	0.00203574849592218	0.00496174267386217	0.0189444758414609	0.342566631996638	0.841533735513568
2008214	16	0.764438620993882	0.00608886671891159	0.0247270502586386	0.00842162487230764	0.155573100123203	0.00607665115012107	0.231938912418576	0.348562320067219	0.189627700828295	0.150734619254158	0.271587014607179	0.00190355958677743	0.178499486268214	0.128964774171049	0.00197959715031571	0.00425056983272375	0.0213233700227046	0.440553981442896	0.914444699982333
2008214	17	0.950409867711186	0.00710298434267323	0.031504277593559	0.00794543996131711	0.17440845004848	0.00603005696420418	0.238478555984701	0.365283205310728	0.219805117219782	0.148872735207997	0.275154499547313	0.0145612893470061	0.186439593233437	0.134833316567451	0.00191749358987739	0.00375823729007942	0.0288509862983439	0.496944504799577	0.853408683373985
2008214	18	0.827167822649496	0.0082063377796628	0.0308869735588404	0.00747218838218951	0.178995589978351	0.00582343538856066	0.265779959463017	0.396560669910586	0.253268382234174	0.162728011752696	0.275935193312392	0.0325898517732178	0.198698007928751	0.128044842823736	0.00184456267055101	0.00347651757280121	0.0409018329992196	0.539641216367096	0.721832702507286
2008214	19	0.642003271403719	0.00989789155503147	0.028174647838769	0.00692344339406078	0.186230798979836	0.00513283498803007	0.29375945337411	0.455042671400962	0.335798325028286	0.192302634937649	0.289381236301454	0.0272404109726745	0.250388373876837	0.11051119593153	0.00177782190688596	0.00319607869785134	0.0492499026003323	0.480208775974234	0.572531533819922
2008214	20	0.783457662075903	0.0114863155249198	0.0239024116306523	0.00638642995346916	0.193180122063584	0.00470151744734605	0.331699626941636	0.578923447742914	0.469872980763095	0.205930523969861	0.309290543195474	0.0177031347457349	0.341093575158296	0.0922998785192577	0.00174588906716936	0.00296088189619613	0.0571533253788536	0.334777057740696	0.456662752086185
2008214	21	0.842383281926829	0.012985480660619	0.0187531051936944	0.00593913426025669	0.203135560181534	0.00432588683315589	0.387093218484764	0.778037696279449	0.601560917260428	0.212884614331397	0.335007396841458	0.0114133091618929	0.450838729913351	0.0776625264502778	0.00175579119779982	0.00278873616974285	0.0764433116483551	0.282639877480184	0.482264610052253
2008214	22	0.810951823828233	0.0330539081342892	0.0160878766179053	0.00550378135344526	0.222607809996027	0.00428165044883454	0.388898416638645	1.08368004327776	0.684982761875059	0.233523489387732	0.359835036800694	0.00630853720675279	0.608218296002022	0.0668709707200507	0.00180186565859602	0.00267814933548941	0.100796247005967	0.240979637257923	0.494536119985457
2008214	23	0.843315560499701	0.104638002762645	0.0153822615225897	0.00507364068010754	0.255098874551904	0.00463869078810103	0.27986740582962	1.28606694733503	0.684092286648272	0.371138903726565	0.378068450263053	0.00293021542524858	0.562061161568703	0.0601233291987889	0.00185314379289787	0.00262614743663196	0.121578060252216	0.227220770685475	0.442217105780679
2008215	0	0.968608498275101	0.114227362019115	0.0147085882111391	0.0046221842769758	0.378907455800206	0.00686888636047543	0.204309665965088	1.25118088976273	0.624808016062688	0.603179734049566	0.391089213018127	0.00233453832753842	0.453268594285839	0.0560765462299672	0.0018726590975496	0.00259925182855486	0.126339091716494	0.228223505536013	0.39967597682338
2008215	1	1.01973303611244	0.104278714865858	0.0140529067575823	0.00509622590524138	0.578704449775146	0.0098333017536484	0.230199066662959	1.06228625853017	0.601489359601273	0.753320744424029	0.391232831681983	0.00258778923859749	0.43325598653558	0.0537726208716645	0.00185716034317712	0.00262169810139766	0.121843272489582	0.228613537413655	0.4326923267258
2008215	2	0.985299166115862	0.127189086268401	0.0134335971606073	0.0145247143105044	0.640162200829066	0.0116987756664547	0.245478343288812	0.74526945327716	0.698794442726433	0.64327443066447	0.380847989759461	0.00326776104766606	0.492024557160866	0.0523609296480814	0.00175232348187852	0.00260155883263243	0.112331996202404	0.224420098125075	0.501880828285663
2008215	3	0.82987440414623	0.253229941075306	0.0128023528139528	0.0584527245253701	0.599479454140086	0.0131716463246272	0.254861302385804	0.773732804004724	0.612225937712917	0.471695447534265	0.358074692149335	0.0037846637032963	0.425719378539793	0.055647998468782	0.00157957384398303	0.00250943247184748	0.101070903702238	0.265731163439787	0.588244886349471
2008215	4	0.68079369210321	0.353260598002868	0.0122846518352991	0.0740228451216483	0.586535698961516	0.0252610318671797	0.35223059656572	0.922875751861159	0.453599746172472	0.478200998188994	0.327627227342048	0.00410102367853392	0.274744118550472	0.0648578212070667	0.00145305822619858	0.00245596448484603	0.0909217338056504	0.387496674043574	0.501501171489861
2008215	5	0.694751986900281	0.331938754761342	0.0119228994963737	0.0473723153297483	0.363580185501103	0.0340341065248802	0.356669056380706	0.998723880673469	0.437971632612047	0.727788385251242	0.270419308328283	0.00413413283735557	0.177866766886774	0.0609983656718895	0.00137554534965154	0.002524128036785	0.079778941380753	0.352919144369026	0.410706091857158
2008215	6	0.778864529925377	0.383877520075038	0.0115091301791539	0.0323261718675847	0.0859270915078034	0.036373488563619	0.284933145626308	1.0255628188933	0.331466949453343	0.753131473506105	0.239435113285797	0.00387081678474725	0.204076467080309	0.0422225506356703	0.00142510697530508	0.00258707561469363	0.0658452686226467	0.205062148946598	0.754516855999906
2008215	7	0.824855178752333	0.527523605959518	0.0182986580703367	0.0716170964525702	0.088054469447626	0.0706376502756575	0.318104898150758	1.02777461714141	0.373756738095028	0.663684151856828	0.216893102756676	0.00450549090652108	0.250964995651797	0.0286633744997487	0.00183148624778622	0.00261531013687357	0.0466370310206121	0.0903611503218053	0.711863482967879
2008215	8	0.709604551366556	0.643600929156891	0.0618493326901298	0.145785583531568	0.623352716656018	0.149586659044289	0.46912281246958	0.988478752772547	0.40699093049413	0.499586568810367	0.207544433944405	0.00462103687988067	0.316355275642708	0.0225007779289119	0.00280699632224879	0.00475148293053317	0.0405924430727666	0.209583393566495	0.726708339035792
2008215	9	0.720379479933772	0.613841504262149	0.0808285470435265	0.215540931659786	0.927114988206611	0.260887977812763	0.414030685383659	0.912227922909033	0.534642985368707	0.426069609327205	0.202990705846343	0.00552666376366837	0.329618978417795	0.0192378661150282	0.00329845820641207	0.00751132756836824	0.0340591927718528	0.287189328728774	0.711825793435784
2008215	10	1.05326262967135	0.567154772549525	0.0758753416343121	0.304430485564863	0.935317304727883	0.296036498151697	0.318542645894367	0.88443022121437	0.706513970977158	0.437723212017503	0.176881398432294	0.00526707304995532	0.329393816505291	0.0151256977671712	0.00299167392801074	0.00769825990032342	0.0254421741142452	0.323744893687212	0.646750636869517
2008215	11	1.7288079088569	0.514753022674584	0.0648070040092596	0.369919302984649	0.883810564961423	0.257658492691366	0.273880004614227	0.906057334757097	0.601513557980495	0.438373339560448	0.161928783926275	0.0048141203631707	0.310303831681764	0.0107663672412789	0.00278457353061379	0.00442556627088343	0.0205471140186495	0.3906067752285	0.575669150968248
2008215	12	2.13579627311668	0.509615327331588	0.0550555345704781	0.388596698653763	0.821178454009607	0.232709242781018	0.268516964105249	0.936744593235684	0.516959961541081	0.411472398606052	0.161636860627464	0.00432806029288383	0.285442779879755	0.00600429999046982	0.00278391913731624	0.00110461736968734	0.0262289392615672	0.561913259873461	0.584977652941692
2008215	13	2.03191912988903	0.547826525062903	0.0481945464919767	0.391792086906004	0.792315970412511	0.194009761936281	0.249546205950359	0.973661312448581	0.597523694037209	0.395989208259608	0.171933497124509	0.00518921085996851	0.315583238009616	0.00378842845717732	0.00304932837875214	0.000874191078423553	0.121127943234355	0.61472169366311	0.503645154573201
2008215	14	1.71468189707876	0.51191475474809	0.0428000704856844	0.35707589536307	0.792223863355857	0.164665085166729	0.220579824660682	1.09255181874891	0.586854509883785	0.401645990499195	0.17387013945058	0.00490802494365955	0.271138303661511	0.00420108212858364	0.00346762585563376	0.0017659314548893	0.20072860532947	0.6017258803212	0.36408353352281
2008215	15	1.58114372116988	0.402383532863434	0.0403280195170613	0.310745583261066	0.795867110226941	0.161150499592438	0.192806157272003	1.30219190231105	0.527636445100405	0.566829247473757	0.164238594342896	0.00457093492317186	0.223981634905319	0.00509745917022927	0.0039097326287216	0.0136124601839291	0.20698570206705	0.711452944851967	0.317426174191742
2008215	16	1.56469180540796	0.296630771348745	0.039980180858539	0.266102471848992	0.787448049397847	0.175250037007881	0.24270789364108	1.28705618768692	0.434647583391633	1.35373958295772	0.160582095864863	0.00424797158130712	0.254765591352369	0.00628272703358487	0.00414693743550638	0.0347158927271806	0.247816468522738	0.764668070990264	0.33741266474845
2008215	17	1.33577806834886	0.241955651711864	0.0392619521698811	0.222097697297984	0.856287880130949	0.182225328717565	0.630702933406078	1.19971677519129	0.372159043910961	1.70531947309668	0.163839419832744	0.00371922256323625	0.246753974294389	0.00288532075276755	0.00437989050571602	0.0425083648906487	0.1471879186564	0.733182406212565	0.309270895725218
2008215	18	1.31774899453479	0.199865447152008	0.0372320073228682	0.191325806928383	1.01334481264042	0.177120130003594	0.976472116916008	1.14199026667733	0.375629487990038	1.65022660355682	0.172797222733095	0.00306431859505763	0.240968147505832	0.000394521696629961	0.00439196029874613	0.0410647302410782	0.406069859761891	0.626760065612789	0.26324898728764
2008215	19	1.47099946163851	0.173503267947695	0.0338089359844793	0.157468025669971	1.00359848345444	0.101290962980165	1.04012964292279	1.15918976972513	0.451295695495993	1.46709983860003	0.187614483037713	0.00278069299823235	0.274392786101524	2.92928122740853e-05	0.00405725446513305	0.0403392751786857	0.536307308546042	0.566448312359621	0.214873915837972
2008215	20	1.53668776522569	0.151778125814882	0.0326987122679945	0.138972678405568	0.930824038749043	0.0842646508630333	0.916687554548492	1.27583216042337	0.602232095817627	1.41362626690205	0.201273697422515	0.00300990037091158	0.304105544729413	1.84073791613543e-06	0.00369845984827459	0.0387214899605794	0.561509397173898	0.567007858460152	0.160840648216455
2008215	21	1.68173211979888	0.130220067131395	0.0322147979038504	0.0897213369609123	0.893807896051084	0.0781741092313805	0.741981786859717	1.36974953647446	0.88698239923699	1.40961000397102	0.186430027836625	0.00342931222334942	0.343981858727141	4.48334297632908e-07	0.00337567912947707	0.0373110773707156	0.612337091591106	0.606613686467698	0.124332970337274
2008215	22	2.29945569926303	0.118045934929797	0.0319201084712988	0.0777029544841557	0.928170073944974	0.0716260564823236	0.677624301668553	1.38466138916421	1.14269578844454	1.41681686846732	0.171391750026774	0.00422062121241401	0.363534307524789	8.23228702569501e-07	0.00287968069491004	0.0369039759041835	0.67584219403309	0.715933032947865	0.0883667655936808
2008215	23	2.14060728918058	0.105723192908809	0.0314486666061819	0.0708437672783636	1.00632054325605	0.0641285103945651	0.683400540248764	1.38814285340918	1.26190246181012	1.35084712941678	0.170153922026456	0.0060252291701278	0.383449440679904	4.92444858356383e-06	0.00264106101875784	0.0371824922965372	0.751734782031595	1.01090828906226	0.0999982566150662
2008216	0	2.01949380882271	0.0800073364735659	0.0309482889638422	0.0706027079663112	0.952757814980906	0.0657544000118279	0.634532131990856	1.34818617424929	1.18702782227038	1.16586975960682	0.176745186419635	0.00889283287197539	0.526047252472008	5.23892906267664e-05	0.00244812672430049	0.0377113032298319	0.891546702417085	1.423874810051	0.0910885934063957
2008216	1	1.92419095132807	0.0681723246505513	0.0304506432887435	0.0832069877252615	0.885407957022618	0.0647410319309767	0.585806864676833	1.07261651716653	1.1297605815722	1.07270432078896	0.182493764895677	0.0117797696761657	0.748874750747296	0.000152050222264356	0.00259325500920963	0.0379494006305506	1.05824501920254	1.54057882139842	0.0932750155897634
2008216	2	1.23136366996358	0.0585963982065834	0.0299317400544481	0.107668234362963	0.785997502767262	0.0592102506049222	0.726027299276081	0.709009172138024	1.12291437300518	0.784921957038283	0.214855936184695	0.0155541403222297	0.81013352895513	0.000576803393024377	0.00353922477627405	0.0373094796967617	1.07287473764258	1.53109269090865	0.1920269380817
2008216	3	1.17312276361893	0.0504313347275408	0.0334117720111551	0.114436431628358	0.625359899433221	0.0516351861676752	0.605159188562244	0.56432358503953	1.10625256397379	0.674779281856985	0.225925361431381	0.0192558733598033	0.726723208045712	0.00226796389127245	0.0105245305694332	0.03617889349766	1.01684967732721	1.46606153256599	0.363795107099488
2008216	4	1.3081032858414	0.0434940162808497	0.0331707553215923	0.111579408794045	0.47498778590053	0.0428292223510877	0.452764001017191	0.508090682918836	1.14026622652705	0.778821684290503	0.23337124378722	0.0184180980517893	0.660073041691958	0.00745018588291602	0.0179063310635702	0.0357861843177237	0.95139838266881	1.41819727805078	0.37709495715504
2008216	5	1.37397910664995	0.0378650095809931	0.0330374396286926	0.108836450261111	0.396078352214144	0.0388215247387118	0.352892912635867	0.40473971287742	1.12486312685174	1.113428908017	0.255011353792633	0.0188738620615897	0.808727094203868	0.0204124836074456	0.0492351683609494	0.0414771648416043	0.939593818483248	1.36623304000641	0.220380201642527
2008216	6	1.39064670369494	0.036840865653589	0.0383613319069358	0.113501858522022	0.322815334409331	0.0387056543217061	0.437307785365259	0.411119375439245	0.895759181429867	1.39473123655549	0.252884878309313	0.0173104190763904	0.721386081980358	0.0498558570774795	0.152388555906726	0.0464551928503294	0.94441225061112	1.32784954101076	0.337592968558022
2008216	7	1.30010166370418	0.0423269177203775	0.0551419744997258	0.10466084177233	0.264136082739951	0.0363930619102758	0.796301540657453	0.528153942989596	0.916010607269718	1.48973636212962	0.262878705200376	0.0146825136828891	0.514252095230956	0.0845357510683761	0.275167942226921	0.0470632144944187	0.933779449354105	1.08527295767644	0.472385451186887
2008216	8	1.24967531822166	0.0536590810833339	0.0809002867042529	0.0980102218494166	0.238493816577735	0.0618320763236912	0.931931697770514	0.717840298379908	0.877920571941214	1.48434321396721	0.3121155299246	0.012854695500516	0.303082922173235	0.0892204319161932	0.285307596282547	0.0489043774488893	0.901848657898828	0.614098905617204	0.370946787036216
2008216	9	1.29947847394262	0.104313845962145	0.115310948917729	0.0895643789958166	0.226342457637887	0.0811157578882803	0.950397766560954	0.914482793676707	0.705092655169561	1.47057594705774	0.314347526764573	0.0117646740976984	0.233395222101861	0.0892766951119353	0.287527432289883	0.0497081007539232	0.804981947567029	0.620553917031687	0.194121592259427
2008216	10	0.918673566623465	0.129128421244182	0.260610899363736	0.0603651043662895	0.196202446679809	0.0988735314585756	0.893744500093016	1.03805735419919	0.883429920257512	1.38209784020956	0.313204761124629	0.0109798707644219	0.328280095471348	0.0770790814505312	0.25457623548856	0.0467171450792981	0.59307927251344	0.919022954280305	0.113494011466526
2008216	11	0.80930750845855	0.118614490431321	0.207071651430964	0.0821456325902659	0.240242823133743	0.118947346918998	0.801015969905854	1.08653531224544	1.05998050249547	1.18493470732492	0.303282668533779	0.00978148496817053	0.288511409018648	0.0727912762793996	0.201207726180848	0.051329529952013	0.35268155691018	1.39870148911343	0.0982051070084784
2008216	12	1.42150460529032	0.10163790022449	0.114310026961718	0.12029812210093	0.328474895612811	0.0977482213184292	0.701778289420691	1.02526272020218	1.01942863689604	0.937772157934721	0.283960589985064	0.00934324318649576	0.302646323163755	0.0558977229238659	0.166895593696666	0.0513762360461089	0.227739280815985	1.51960809938866	0.084476574392991
2008216	13	1.88699254378304	0.10045061104945	0.0826987547161852	0.111292269148133	0.579663065114799	0.0900534802521741	0.541080455001418	0.85155889180947	0.889511285253324	0.884856882640368	0.243960748859543	0.00907232091106587	0.358174149509081	0.0468210191779757	0.143805529500325	0.113024535721	0.163851099307488	1.47333485863611	0.0694647575393213
2008216	14	2.05644794901606	0.0906694102327689	0.0704251253047168	0.0805232291124792	0.611658065264925	0.0895494969864235	0.320595761006967	0.537405041957684	0.77866135530315	1.1443851772929	0.225129111540958	0.00889777833296963	0.319286215757284	0.0447945558695038	0.127213139684886	0.135455125094263	0.142757038639057	1.34258691599968	0.0781774648255821
2008216	15	1.91231948416124	0.0752911454811661	0.0640544876071926	0.066446334293653	0.53799431113075	0.0834471650032948	0.267630635949728	0.677958357639592	0.687645097912765	1.36638607001753	0.213023139880466	0.00829171918005659	0.280362826742973	0.0412763366872516	0.111273002309328	0.0875219284120544	0.15843632765926	1.22768563585734	0.101117387467369
2008216	16	1.66840088599653	0.0636525504201053	0.0594803822769405	0.0574734455837696	0.447173042237981	0.0725938720133144	0.549393085076608	1.1682834338111	0.631499742706646	1.44520690997364	0.193151794041207	0.00739590613808851	0.247647806094397	0.0391322298653376	0.0960090495821872	0.0717584710328636	0.218372826754864	1.17046082047551	0.116328930287891
2008216	17	1.739886809567	0.0574439857548091	0.0534316416580099	0.0692848068098196	0.337714861604616	0.0645110410779989	0.849235145346004	1.22223808750212	0.536971083882524	1.42830158317959	0.189747730091192	0.00629757112096441	0.244844724749403	0.0454801648242862	0.0813753974073457	0.065037138989184	0.249232363507843	1.06397126996424	0.122865808171841
2008216	18	1.73743261137851	0.0459066289251608	0.0496995441969921	0.067506155141793	0.263034099652583	0.0530723106936741	0.901338800578218	1.08468719352047	0.404052303367627	1.25756665184985	0.19877032751125	0.00583141305002368	0.303281617065126	0.0339352921120465	0.0695158449284428	0.0566417382408342	0.238386824427843	0.801717706089443	0.127683913340549
2008216	19	1.57741603790072	0.0313243825380289	0.0445841643371057	0.056721426947835	0.218347903779245	0.0423101180312248	0.827884050190401	0.932997422629824	0.422463196491843	1.12284527117997	0.219710357086395	0.0056881553226028	0.353588117961659	0.0414352512336206	0.0462781844416272	0.0447452729902855	0.268875639067506	0.613409553137578	0.179211397746849
2008216	20	1.51016345943609	0.0253043704307983	0.0438163037791721	0.0475468337407654	0.215962970948537	0.0314718661909285	0.723788232768813	0.859855095592969	0.599634133964946	1.07515204762767	0.258495330987399	0.00534191144227888	0.315883638884948	0.0304268425137089	0.0405905922938785	0.041314198223679	0.419544974001546	0.657299471839557	0.225654523516072
2008216	21	1.43391885974308	0.0269580649006816	0.0448753501843035	0.0404175477267759	0.211643294214301	0.0235957395261191	0.654897507951157	0.604938645381486	0.885554044647199	1.05451275149165	0.323053565928278	0.0048998369640196	0.493111149693797	0.0462071440745541	0.0363451521556149	0.0394679454683385	0.593254313601658	0.98935326437191	0.253708458498556
2008216	22	1.33861334689543	0.00788842109625659	0.0606474418835249	0.0381008312824241	0.186816129045252	0.0281142702979643	0.606489569035496	0.455335194274342	0.884695005696294	1.0826304735107	0.412619369639629	0.0042939185397473	0.816197861438574	0.0648735432449915	0.0360104449950124	0.038611941397645	0.594555053225148	1.11286798421377	0.347512418860056
2008216	23	1.25149470227158	0.000329759749942289	0.068741446951602	0.0412942504268935	0.181107503117394	0.0213740621574933	0.567870725865215	0.35558456691191	0.811709535939228	1.05460444038332	0.48015194676779	0.00366829332394448	1.25493431622478	0.101979289712718	0.0349211594174637	0.0377326877634967	0.483993603145686	1.1736643517425	0.444358058298884
2008217	0	1.20945461831243	6.1758750130745e-05	0.074200131603084	0.03919576009955	0.184064663174975	0.0167047750375435	0.556238885040015	0.292839022429107	0.796421383186601	0.858238149044991	0.505793915635732	0.00349402130861523	1.40842387698179	0.131932751014693	0.0335443201286846	0.0377562325796341	0.372048619943257	1.21056007106417	0.440911007213954
2008217	1	1.12817446878525	0.000121533125845924	0.0777131987382355	0.00209445737834539	0.18206079406299	0.0182819052146014	0.580795358473677	0.291963810529372	0.813180813169161	0.690531755840889	0.531834207085948	0.00392287676653626	1.52936979789198	0.163975433057741	0.0358523929756554	0.0394386144604452	0.270377215449125	1.18027468876589	0.435297589989019
2008217	2	1.0544380709317	0.000436098911967689	0.0823059070651964	0.000158301139259421	0.10714235800015	0.0190235419036385	0.606428154082637	0.320367576770732	0.780572157872742	0.720327267837818	0.548120573037255	0.0044339093546535	1.32506245444682	0.184208093580607	0.0395542440985115	0.0401098742223159	0.175918852712407	1.12235715249922	0.443994985676757
2008217	3	0.989800100697294	0.00517565749826292	0.0874691733138075	0.0011528317550663	0.0793132622630724	0.01974644916633	0.664980302689144	0.373779415966357	0.806520543646052	0.77716255709048	0.535654163828047	0.00461169710730012	1.23898570599046	0.219323656551544	0.0408541010560167	0.04065699787244	0.137024609572372	0.994607768378389	0.436323238898733
2008217	4	0.895839776769217	0.0403113648855444	0.0858791551813941	0.000364086307327116	0.0977788280215071	0.0254237493541113	0.643764805834613	0.41191100801431	0.812507748222275	0.759348237459275	0.494093163015564	0.00469313632827372	1.13595456414332	0.240308791412483	0.0407348686264398	0.0407873397599383	0.121635232164546	0.90386401455074	0.481872384028259
2008217	5	0.781729602923424	0.0852939875323472	0.0970392506079072	4.9442047056607e-05	0.0847020681675103	0.0378941095177927	0.576322440035133	0.463673123082439	0.788482679221594	0.708848959027573	0.461241458835773	0.00456449361620653	0.989783495867809	0.266742046234234	0.04089667296729	0.0411368856956254	0.10597754010508	0.862469121342793	0.146185332954195
2008217	6	0.595534155309074	0.113961479360146	0.104020075594143	0.000376205145161868	0.0964431030670474	0.0408935522847304	0.546190220931739	0.49090180699068	0.763184678967979	0.664438878016125	0.448619992408206	0.00469260689950149	1.46986983340244	0.271377793913718	0.0596623350724464	0.0486730305669848	0.0382457635704189	0.835387696052012	0.00737057183843635
2008217	7	0.329856898449891	0.124461728784132	0.0944345678288707	0.0148979433877502	0.141747505669019	0.00257903979177193	0.482354673172204	0.495910596303031	0.741926229024099	0.624124277803647	0.456002938077689	0.00459623128047045	0.891806746436245	0.272488932203179	0.0593622871926738	0.0500669905657336	0.0117904884687474	0.706747873005508	0.135538021944547
2008217	8	0.396695070317424	0.124952844459687	0.160751406815529	0.0470941094526485	0.242944211998952	0.00471682509255968	0.403468919710416	0.403741312411464	0.726827933347169	0.590730239042492	0.452303653176393	0.00487175933707585	0.615269501460034	0.276289400209392	0.0561867890790895	0.0441928242744129	0.00746729494576541	0.581159038229305	0.581706922296135
2008217	9	1.56710888733279	0.145597453594907	0.175386848551564	0.060662618343176	0.372960087252532	0.0189022561327744	0.337845931358059	0.158838215897931	0.732680856212984	0.572389763629218	0.438015251075035	0.00483174578455358	0.499978934757703	0.268712973839005	0.050145166533845	0.0665098870168839	0.0140774844172538	0.508696807664353	0.910851909991205
2008217	10	2.1282235235868	0.148221294822447	0.147361354701414	0.0721763621200622	0.362983713633226	0.0205283947526524	0.29338758194521	0.242236131523096	0.735498724816528	0.486937852855299	0.433538761070335	0.00444389662794435	0.43744523675167	0.272540748872066	0.0433671882973106	0.0787926782679563	0.0633951541366103	0.479112327526803	0.891922781061061
2008217	11	2.25321369126839	0.104278179978974	0.125626144614954	0.0698258799423603	0.169778660976828	0.01957131287695	0.275166895788031	0.667207264902154	0.729557381220672	0.356442300749608	0.461057632752242	0.00419717600365612	0.408944626960783	0.255881056869515	0.0405397237193451	0.0826434507538777	0.104301384856463	0.474699072101118	0.883613366674748
2008217	12	2.21652438785877	0.0409631183626813	0.130302064336918	0.081023216493395	0.30916151887909	0.0206921775709892	0.248202797485602	1.26969984353669	0.709821958600935	0.229666649029444	0.53485940027082	0.00433402079020631	0.384261405794838	0.252761975617699	0.0379667996110101	0.0753632009354367	0.167245499899297	0.517511655421211	0.747211007402603
2008217	13	1.97300855142869	0.0278979132483968	0.110087381392434	0.0830592124854855	0.824672728139538	0.018281566041271	0.202251753833604	1.79433202746227	0.646909879767888	0.229274570918079	0.60866155154623	0.00451083520448413	0.325734653273545	0.183938184685727	0.0360670593967494	0.0657836985449025	0.208044590402796	0.555476722801502	0.642514583375461
2008217	14	1.80368273870335	0.0556797036419276	0.102563559335696	0.0582630932772827	1.2821448062954	0.0162227465939274	0.147152232796079	1.82375118539928	0.539570438078402	0.352372489894486	0.669504653025872	0.00492605848456782	0.241051866030223	0.0975269988769926	0.0408322724535342	0.0515685389111759	0.27162186293891	0.607786256838145	0.708845816774709
2008217	15	2.04783290570379	0.0529997045846769	0.103179200267316	0.0532873449579694	1.60011867821294	0.0324829652760075	0.120637337818794	1.81578935272824	0.435444908746909	0.535259745311829	0.649931926213729	0.00529539144496887	0.172061184408915	0.011442192734705	0.0441452640917243	0.0377627809867461	0.423395232396188	0.677578054021849	0.754136463703248
2008217	16	2.16024588871527	0.142900466635516	0.0884966947233764	0.0745372875753228	1.58452071590114	0.0529588654239515	0.117275123067393	1.7439928295106	0.369788217187955	0.772052641256007	0.438081868034835	0.00610129719166157	0.121088717676126	0.0023160479174279	0.0358102350471701	0.0307139768431802	0.367356061064684	0.775487726426061	0.74781539304899
2008217	17	1.73747663021965	0.279843460262054	0.0777309126120669	0.0661083240719397	1.51477190201471	0.0437558350002143	0.152222479874169	1.45226036795683	0.338607421335327	0.93782469762487	0.284687426767324	0.00711029525179587	0.0808864311088306	0.00366062690245161	0.0351846448907615	0.0240104966411475	0.299315971668331	0.831110123702442	0.590894699929155
2008217	18	1.57388055724445	0.327347694754898	0.0638352181889695	0.044137431498482	1.54488301408355	0.0859443616293099	0.227057099760564	1.36658157053162	0.320255950203883	1.06551394717117	0.308492410621141	0.00796472534897191	0.0491737652619157	0.00848985697086854	0.0364670382845804	0.0156144226509765	0.517470830832643	0.844982190346688	0.433665373285568
2008217	19	1.49765342169077	0.370294409893346	0.0469022854270401	0.0801140234817965	1.37271018493797	0.130247958396294	0.311411730327799	1.57834150809464	0.30385480367325	1.14356310534537	0.353248617409495	0.00869501968039541	0.0575188853497272	0.0194002026083281	0.0283632800360005	0.00406990453884934	0.838600600422649	0.828988516926946	0.419015386809527
2008217	20	1.13878411468382	0.344188003532259	0.029000727511445	0.220581489626089	1.10180392092392	0.132574675498731	0.390991557861865	1.55824578901399	0.288933683970525	1.25625684989409	0.381184443511794	0.00887111628286435	0.0708841214051564	0.0181032856081921	0.0227288258508704	0.0162364616688097	0.989460688025622	0.800580099701294	0.442544924421755
2008217	21	0.885829540033309	0.326112981929249	0.0230951502253076	0.344354182159296	1.05109604155502	0.119188596291111	0.449188822002615	1.31178701319409	0.278619535823616	1.42860842769028	0.395637807285768	0.0106259781131256	0.0801568693365644	0.0161962201055193	0.0200552558225497	0.0501808670017269	1.0344775740398	0.796304455896165	0.402214027691214
2008217	22	0.939545452869938	0.354813492889039	0.0206804837003931	0.354374153428414	0.820433433082947	0.121476453309161	0.679512813553302	1.22523925536379	0.282945264925651	1.53156179334738	0.441616798342615	0.013698245245241	0.0592335171436786	0.0202506835891733	0.0177543716220875	0.0543780425339876	1.25151846159393	0.800615396125149	0.346532651188671
2008217	23	1.31551993999797	0.418681519956946	0.0195736433094331	0.315529628653994	0.703165082814793	0.110773689370654	0.966662339835718	1.05354680355841	0.289049667276261	1.7988612164769	0.616031657078922	0.0165969283064326	0.0506398657120053	0.0284247825240519	0.0132403828327192	0.056568116622328	1.27681439928787	0.789767397269142	0.34573541094236
2008218	0	1.77968959205593	0.506071638954706	0.0188690260312793	0.331915544616738	0.870872550145272	0.104956630785173	1.12955492634096	0.697889230351828	0.299717364212483	2.0232334698409	0.697919596431199	0.0189872248470417	0.0465461532288557	0.0249602540697257	0.00756183663381498	0.0559539361472165	1.08375030689066	0.792660580079757	0.309766436402664
2008218	1	1.99592659380067	0.638678062746847	0.0235628299269231	0.401555846831874	0.763486388930753	0.104738104559159	1.39989999701804	0.542491079432841	0.321199631758462	1.63467309406853	0.631584332176949	0.0204264776494551	0.0335102076145023	0.0233001539143303	0.00891782454611735	0.0558863212078985	0.99698882866131	0.749302672244034	0.268776807347902
2008218	2	2.04374725933698	0.74427394822426	0.0249198346287524	0.444015883506215	0.681708272270518	0.112933199690459	1.56442182469839	0.584104209040636	0.348576050434149	0.830727156174262	0.465012674314994	0.0188777511943559	0.0115430438529538	0.0240807268951437	0.0158552665714329	0.0591605563582822	0.917058437907003	0.679710487612076	0.26468966535483
2008218	3	2.02606124745638	0.763855491285448	0.024333266043719	0.561701118390885	0.611265123088476	0.12715577667107	1.55812222752193	0.653389787257126	0.376723133648694	0.693063756980595	0.397179545352603	0.0189475919524555	0.00325724634065162	0.0255354646021966	0.0161793039860917	0.0670285235219531	0.70995337822761	0.517854815344911	0.297802825409888
2008218	4	1.9824351412778	0.702565419933731	0.0223117280489331	0.673058911427076	0.582620873497246	0.198668738890852	0.955832603088928	0.643021413049975	0.502237113255053	0.670775467971349	0.369222714747041	0.019610829413968	0.00236757447468653	0.0250448277446169	0.0363923073107732	0.0823203393716281	0.439340310636382	0.317474298066747	0.286827588450163
2008218	5	1.84444640890577	0.710210633981897	0.0191524616980523	0.834275486968228	0.593433287661695	0.28356646979481	0.595346728918086	0.579613075261108	0.629909490413244	0.753794803495735	0.373720876676197	0.0192594790109904	0.00315377177698416	0.023630525678016	0.0603130692901116	0.0706030227828723	0.334215663127583	0.210714683213551	0.272666757096021
2008218	6	1.63135229663715	0.768666363456877	0.0447138774548636	0.918931037833362	0.583917455538538	0.361926975671813	0.865616673540988	0.576638797385454	0.65044317943946	0.869797208847538	0.406111440074082	0.0208421955295483	0.00544380273358539	0.0219341101517682	0.0853509818299185	0.0640007757601916	0.334655595676428	0.177551393211648	0.258787826246089
2008218	7	1.39748050540195	0.774714688639749	0.177699220599205	0.891044188115176	0.560006116329135	0.339541177411499	0.867201279523553	0.592905934837473	0.542220784339758	0.878917989984176	0.469070362577929	0.0249344710811934	0.00965460675056054	0.0169044311219593	0.104931906213735	0.0749675894608454	0.593675833983286	0.171453263859501	0.261087220686111
2008218	8	1.16651222555808	0.75753150932229	0.127170543557993	0.812413690287394	0.553557802855776	0.349132974069597	0.817549265571167	0.528159342341339	0.479893398014728	0.851113638891382	0.702977603644081	0.0228794807873751	0.0157498430567925	0.0126884333513441	0.151910013517921	0.103562338315996	0.631207690664506	0.147040175937892	0.271767893870869
2008218	9	1.01920632188887	0.72854616060895	0.0919668009120049	0.717064873888657	0.562228683473035	0.376973140228609	0.804481145903107	0.505062053276036	0.461878456458997	0.79889271935264	0.745373099963877	0.018939382223106	0.0233700919200469	0.0112481876336689	0.193139232069349	0.156397693046664	0.573664264322639	0.135033734158516	0.303674453154379
2008218	10	0.966277461402324	0.638507218954238	0.0714568339928528	0.6427983405083	0.589940316254883	0.393184405087422	0.796844337854162	0.509885951073296	0.443760327535242	0.764804775594157	0.812056872442168	0.0174961514502153	0.0265685316082727	0.00938906006712184	0.16985779312868	0.194825884891387	0.603645871350709	0.124638584636679	0.362206952837023
2008218	11	0.89812479856747	0.557081149172563	0.0621932832537045	0.59221050284567	0.633475398360326	0.356530380637947	0.717715612639934	0.501513414437769	0.425757713721311	0.738760071087785	0.806065274708983	0.0182368178887583	0.0263387588312047	0.00823228065042579	0.165639405100721	0.215552312095874	0.629271372348767	0.146817849386574	0.435212595772042
2008218	12	0.828050860439551	0.495195896937618	0.0541528749588032	0.557669642749575	0.705306616179619	0.305578244831203	0.572569744792329	0.496271704354636	0.399519045010198	0.751349644652728	0.627595655402205	0.0177333575077845	0.0214816750500626	0.00764883366862194	0.166911678230809	0.220730419560546	0.587520178947051	0.158638633896461	0.475869530770507
2008218	13	0.748650924024237	0.423863019521812	0.0469941629793102	0.559885866338603	0.730746836795638	0.270806046016735	0.466198024308421	0.481767704939788	0.38107030077921	0.814477736913923	0.403878730827719	0.0161242626012073	0.0196179288514836	0.00786499927335122	0.19559489981571	0.212029957144056	0.494951887332289	0.168129099991522	0.43504899139293
2008218	14	0.661523543279	0.376878572859146	0.0413047067212953	0.565999306206341	0.722580299513554	0.241931211398698	0.420728781031736	0.481111099306548	0.395952582479129	0.875177355729396	0.228275814026011	0.0140165091157251	0.0196586622238472	0.00765933074645693	0.222101801003019	0.204292187766622	0.392287496652627	0.193913925454209	0.370093283144951
2008218	15	0.597577849990824	0.365071900775029	0.0374682854076733	0.545003451503993	0.664080875219138	0.197974421890991	0.395382145493214	0.473066755439718	0.407411337141224	0.889088780966188	0.160624436370003	0.0117909639103954	0.0200490577216433	0.00911058109151041	0.196690795573982	0.157499705108443	0.384683712255713	0.198346207047709	0.335875486449276
2008218	16	0.529222913363263	0.345386449891206	0.0346231797476683	0.513347397876594	0.63531579242539	0.141615640206219	0.386330409576118	0.457288627212711	0.426302973479878	0.86620435905363	0.129948498893179	0.0107841559513106	0.019237515348636	0.0100027300576889	0.175368697210231	0.0986598003804093	0.405517603237374	0.185475123923751	0.277151071838347
2008218	17	0.47146171400875	0.321082153559261	0.0324551661193949	0.470875976691314	0.622318944403826	0.103890602194296	0.368638197781615	0.444767855505344	0.416469928815693	0.823869715547685	0.116221234525859	0.0106700194893422	0.019799987729108	0.00773921779424318	0.1535017246747	0.0768453189166818	0.480044376349276	0.177337783684033	0.266731613729872
2008218	18	0.430582852602561	0.294646704018988	0.032261657937214	0.432471015249954	0.595176321060427	0.0935533668289024	0.322493559617383	0.445254303130534	0.357841732141377	0.84886253683817	0.11038045186973	0.0101735009575435	0.0249699101141417	0.00609777437504056	0.116701899959479	0.0577078350113691	0.613353002251622	0.177854988447039	0.252328045799441
2008218	19	0.406936664528042	0.24980846478019	0.0278556816540978	0.426882843284527	0.549123869571361	0.103463627642432	0.310457556263562	0.472134641249279	0.289070873562779	0.840185418135187	0.102090479721161	0.00991979942644859	0.0497675439043671	0.00490695490671997	0.10881264516469	0.0502711218416067	0.757414042349023	0.188673763523199	0.220241416153395
2008218	20	0.394915878218757	0.206331636099721	0.0254686578117032	0.4359405022423	0.479979382895174	0.0908197126071793	0.299466886327182	0.548189869444174	0.246919065717161	1.94502964801401	0.0930940180323277	0.00952755866333586	0.117513043340032	0.00442438565737798	0.105910201572391	0.0473455286070067	0.941345820295506	0.213233754576008	0.178912431852299
2008218	21	0.386504983978372	0.162901309013774	0.0250819938092835	0.432447376757584	0.428065176912821	0.0791190314674333	0.293895236036742	0.660003087866912	0.227690782407436	2.82681146968672	0.0871127816457717	0.0094140232282783	0.231008649705243	0.00434663073100249	0.118234046795726	0.0433060544133329	1.08437919313679	0.258381450891684	0.0150099143247342
2008218	22	0.386242157164242	0.132714505078909	0.0251289805917902	0.407999569953693	0.415429966993554	0.0863757395033127	0.340135682051542	0.758606760364393	0.220201706318566	2.49600505704264	0.0864378624567678	0.00926545941189969	0.337446328656741	0.00453853531223238	0.140797189346935	0.041606514313491	1.18530968061979	0.30851688035164	0.00682490552945468
2008218	23	0.393086447308017	0.0918598317750963	0.0246352323144598	0.366624562765703	0.411115379322682	0.0893071065848381	0.426105454325243	0.840875954117818	0.217179835091662	1.89273436568783	0.092753168460663	0.00903106454099319	0.375079321476409	0.00534329174372886	0.155236339181674	0.0433961578486243	1.12655266844743	0.375871697027085	0.00387969211482041
2008219	0	0.405314605291136	0.0712720043970328	0.023845518354806	0.314646319618766	0.410126190389494	0.0810954249902339	0.547157090891647	0.899113669648269	0.219642671900081	1.39030030801593	0.106692315680123	0.00919764312046435	0.356127010534698	0.0065397935669066	0.133125274158736	0.048859167222822	1.0555719037526	0.437625375632529	0.0108647411624096
2008219	1	0.453759302628207	0.0628053127343339	0.0236043140003215	0.294241935210277	0.41908055238473	0.0718843053647465	0.702677269911869	0.929556494662071	0.225629822971554	0.852047274022958	0.122144827189829	0.00935507882728794	0.317553609280226	0.00754719620989063	0.114404299411684	0.0516937836946255	1.04151826672516	0.487913679295828	0.0371265993155404
2008219	2	0.608475272841716	0.0559278937633939	0.0288634238037149	0.254426202856236	0.434475611106018	0.0813751959065949	0.957842698644682	0.928795278930113	0.231024790620506	0.594158155247887	0.142243126844201	0.0094225603425349	0.291397442071394	0.00843997021201864	0.0913776284540428	0.0511601222332207	1.0293887637932	0.536764820028401	0.0480583342157007
2008219	3	0.889558737351429	0.0501445025030997	0.0328690993681786	0.266487054085109	0.449727026684065	0.108802256975882	1.14744320993312	0.914209085321331	0.235094826096337	0.472088484383365	0.148428229918658	0.00958928480052116	0.293837188777562	0.0095689004152206	0.0827643644661773	0.049565367019397	0.992426092846744	0.601772647893963	0.0510078049338031
2008219	4	1.11217790485546	0.0521889794202556	0.0330951870453148	0.320194433159022	0.464475637985667	0.100729539122908	1.18090326718551	0.899752651777248	0.233571779011683	0.43583200772582	0.136697209727468	0.00989946950974768	0.284712305785751	0.0127333186193849	0.108531997961817	0.0463565387385821	0.93908731006153	0.676215165672792	0.0801604365144718
2008219	5	1.24103447864931	0.0470797270076866	0.0373928045736714	0.364518112057875	0.476292005862004	0.0878079450836613	1.1438630369617	0.900512725730247	0.230779393788021	0.403821118180102	0.126016070796049	0.00985277128206411	0.245457062913947	0.0225709558376656	0.156987112318132	0.04528291356582	0.861004606242784	0.744531808019771	0.323636485319333
2008219	6	1.30013302676009	0.0465461506138862	0.0431462874736813	0.536012747390395	0.488716405721341	0.0783710851483015	0.854889766017753	0.84780794141887	0.225537466243057	0.367916394359519	0.119132822805013	0.00995827220556208	0.244624546156089	0.0415449851284741	0.201482491216371	0.151428516457357	0.795832237231583	0.793285984921451	0.870647807401316
2008219	7	1.28626117489424	0.0514881305820698	0.0465904315901828	0.575185308400513	0.500626275713717	0.0645089096779118	0.653437643008857	0.831469084820982	0.238352033684979	0.373486744033064	0.108825138227743	0.0110943196114384	0.263924869380238	0.0453870426408908	0.233445245728045	0.156467508791927	0.711630129654124	0.788271082815307	1.45614212945887
2008219	8	1.28033186113676	0.0644745486327956	0.037203694599652	0.482703800172221	0.508550578698594	0.0801858056172665	0.463580744019766	0.818845946232698	0.275140077214635	0.38517028326746	0.106623254209135	0.0114854224754675	0.427728182623829	0.0504804794370382	0.220573772351293	0.136818613720383	0.589557551416118	0.749463574329304	0.897102806210603
2008219	9	1.29064929229584	0.0729985752322332	0.0285204844680225	0.427042095505725	0.512374881914564	0.0859757956897477	0.304046516181867	0.827048743979533	0.328320588755415	0.41119070736233	0.108370049631322	0.0111700945235024	0.483517227576541	0.0619249754946908	0.221133075960935	0.125384565434243	0.467831586054098	0.680797529991445	0.335714671340174
2008219	10	1.29795906520033	0.0622714728267351	0.0219760620571426	0.405350246134403	0.506080451876502	0.0917515651879105	0.238999708248192	0.878869423089272	0.370706774654662	0.476744063852106	0.112991454230582	0.0103027915828972	0.520250817269796	0.0712730211389339	0.212396272462065	0.118085709285133	0.392483491454112	0.64950225725128	0.241415164754137
2008219	11	1.23358127844975	0.068873928861019	0.0174849167784467	0.384682033666604	0.498915501236636	0.0986124357707632	0.199933439733545	0.900966873759099	0.415969963290103	0.565839970237305	0.117154166138866	0.00874859329038871	0.491845787132352	0.0721507635690499	0.209987068995354	0.104773222824654	0.343951957986466	0.529148543639934	0.202522337309612
2008219	12	1.1168160295866	0.0678992849848632	0.0152323813401391	0.396325746900349	0.490592905294727	0.0981159781658644	0.164978218527216	0.913406931656724	0.454257275899462	0.791877222246391	0.125919625556152	0.00775518317986003	0.455274583056386	0.0718935766048443	0.211965805258442	0.0909419932747096	0.310606580649818	0.487346850739315	0.169924337124942
2008219	13	0.922090463969791	0.0615147323833501	0.0191459872132358	0.40765774174258	0.479037148138094	0.102632751065151	0.159474937748145	0.874446901934463	0.47986946746112	0.913933647434568	0.133035451755696	0.00715986438223903	0.407157124980416	0.0702915203960964	0.217869256499768	0.0796293049194612	0.303497163567237	0.489469003982378	0.138147157390838
2008219	14	0.756153080507173	0.0524270053087748	0.0164085177483631	0.327315666916005	0.464576094832917	0.107668579785822	0.175523431471001	0.782072989626198	0.519761961603945	0.823994432305547	0.136051194238454	0.0071689077310812	0.359231203563218	0.0749071271930044	0.210360252475655	0.072330295554084	0.302809368617027	0.521459509519512	0.113944930660814
2008219	15	0.743701968371855	0.054285022135425	0.0141344754435065	0.22227803581898	0.448502119573544	0.109796682867369	0.22204789815392	0.657573082475193	0.580290659933831	0.603449874473176	0.137380425640531	0.00743200660356427	0.334222268174122	0.0949496875500369	0.194660853244261	0.0679057953547043	0.307471494803802	0.550025873905739	0.0940207680467759
2008219	16	0.751916891258584	0.0566490828374814	0.0120511089322959	0.138268675069465	0.43038139688897	0.108162916972698	0.329916126807149	0.58055172508513	0.636545109857336	0.439436253919173	0.139369253854773	0.00804981985373623	0.324982721120695	0.0852501914924238	0.183486814394894	0.0653056299271587	0.307991130683551	0.587353967371805	0.0782836547893375
2008219	17	0.773986491199215	0.0565949810682177	0.0103028779903285	0.100789301735767	0.40773750556659	0.104650012521402	0.411027082648396	0.569957853599463	0.698581883762398	0.36935366084853	0.137937562877209	0.00838962812834136	0.368574023793722	0.0824643317271591	0.181463261315653	0.0636960434811852	0.295375796946928	0.621923454435874	0.0625301738315188
2008219	18	0.902779041050578	0.0537419553447947	0.0087141254174317	0.0682850291162835	0.38958949891635	0.101524031701634	0.386221984542141	0.541613504416295	0.762769134269109	0.345258381736336	0.158666666961472	0.00851609490583603	0.443883276111968	0.161296126813603	0.166970685292917	0.0621876541329559	0.269358263111865	0.640909486498882	0.0342262965660516
2008219	19	1.04721326644606	0.0494357278327158	0.00681264017544125	0.0631421670692342	0.366647750674921	0.099655876957107	0.330010134220591	0.455797019523656	0.838529862302972	0.344757514735373	0.191042943829553	0.00892397635538317	0.530612764108167	0.209989519977931	0.120189139603184	0.0599190833343186	0.218833918710134	0.688369246991851	0.0235440527599975
2008219	20	1.17156215046125	0.0445197758628216	0.00584862897679895	0.0649952908111636	0.360224491938499	0.0952148032213134	0.307674404983996	0.370122965361299	0.930555801046656	0.23233360461646	0.217505885575284	0.009146735248752	0.609915677267516	0.28900176348159	0.0987920817544603	0.0578047900477319	0.155280793155402	0.760052604394601	0.0187832656679049
2008219	21	1.2437085297477	0.0403828425738609	0.00544266751945457	0.0736327505624716	0.383684902593276	0.0892096182612197	0.334807457860265	0.30411284551287	1.07133045434603	0.133045810989624	0.238195241216091	0.00923594446262499	0.524185034231324	0.313013922898669	0.0911580866048585	0.0555602912746964	0.127952428471732	0.902790898869635	0.0182808648352272
2008219	22	1.28479295682451	0.0368151187041022	0.00517112417112901	0.0840826719255125	0.374248299733403	0.0824228025225539	0.358969031924903	0.290842006259236	1.23597089039361	0.140655405907043	0.248559244152089	0.00949800066578618	0.249161285332169	0.330104303597113	0.0824658480503019	0.0544807211902861	0.126768169195332	1.09610730848401	0.017452979941755
2008219	23	1.31514553093563	0.0342617707741946	0.00511740732095357	0.0866817381492775	0.359430395535834	0.0732846612670847	0.372359106280858	0.315845273593689	1.26405300489044	0.203113571873516	0.242820153271871	0.00979296555616976	0.256368702561926	0.392362228129712	0.0728792384378719	0.0534014668540432	0.13550617890998	1.32592587158053	0.021452677446538
2008220	0	1.36114209554161	0.0327506582452299	0.00538283018179074	0.0878432472331445	0.319076966210651	0.063767829692917	0.338264987574604	0.388570075378077	1.27688825203375	0.434521188306961	0.2258225678967	0.0100144334760655	0.418513169513811	0.478223811523313	0.0591328687647064	0.0525989176753574	0.145089220003294	1.57240046701008	0.0212265872309454
2008220	1	1.2413417876407	0.0316962619821404	0.00554074108262426	0.0886709243889096	0.261683959574323	0.0541418557272461	0.239584306487446	0.457836588379667	1.12877055211347	0.639385430410279	0.212308494141009	0.0101255971744844	0.191662099231015	0.492293506491377	0.0476416899736333	0.0515152389320108	0.146611159322663	1.68550100085228	0.0204953775257173
2008220	2	0.914790660048442	0.0316533460175054	0.00582017640802833	0.0893911320066541	0.215975461947281	0.0459376336938652	0.196993095925815	0.528776633736516	1.00221148928136	0.631065544216694	0.212359146040946	0.0103832255860545	0.0535844760897533	0.536200713375769	0.0410542326585005	0.0498623733585775	0.13474571531657	1.65342696502715	0.0203358334711423
2008220	3	1.13127009572512	0.0324392967260528	0.00571142743018061	0.0879535290483399	0.196381251427093	0.0399021738249103	0.245309952081409	0.578001439673143	0.902458259816438	0.507607718309487	0.206275315452973	0.0105330429567827	0.123295921511	0.554998436337293	0.0361038012341822	0.0456308478226762	0.128897917748543	1.46918468545691	0.0194771908726616
2008220	4	1.22755616573804	0.0347124166116644	0.00533345739504916	0.0853077745540029	0.194795755216262	0.0347612071035428	0.436700471578458	0.610733686530487	0.95327079877792	0.499175128714686	0.184948988299627	0.0106936568982314	0.663838668569423	0.521145519293078	0.0339686241901217	0.0414758064542993	0.124392206855167	1.33116011775319	0.0169856318620177
2008220	5	1.20320128732598	0.0369225347572893	0.00544418619149961	0.0817220824219547	0.200641443873554	0.0345211729118896	0.490293311526247	0.592973402087554	1.03828906161244	0.45881697908657	0.15686182173455	0.0115663167660479	0.666445577981599	0.471841514563091	0.0450443968770088	0.0427930149544112	0.116907141145674	1.33449856364275	0.0138157711223205
2008220	6	1.19171789459093	0.0705237347801445	0.0056020044558465	0.0782838590205918	0.204677348344845	0.0335746358635638	0.592477187804006	0.532835325313809	1.23738023493976	0.450993743514563	0.136943689069098	0.0136249303698938	0.337021392162462	0.29005528607741	0.0788315306616109	0.0426963433222472	0.102802647278766	1.20793928647969	0.0112615648583922
2008220	7	1.19615407405348	0.0948895571005391	0.00613541095117968	0.0696922250506039	0.203081396196201	0.0329702364280951	0.628201137398297	0.51399639619351	1.39556866116127	0.494867277239047	0.144484148655288	0.0252888239530555	0.277385780729102	0.145432744387278	0.0946995002604614	0.0408877424104532	0.0846635176860562	1.06086943159705	0.00826496241505862
2008220	8	1.14756867662734	0.0968815290559562	0.00667836941590167	0.0799122715730866	0.206020184332033	0.0343645927673375	0.457636333624785	0.557427038618742	1.48829562181718	0.451092622208086	0.15817785007114	0.0378443270337286	0.304193293837406	0.0503638472408476	0.112594949884918	0.0397195689072007	0.0795908382411996	1.03676027059671	0.00711351072391919
2008220	9	1.12874955682375	0.0961513849467812	0.0085556055007562	0.100573417632568	0.241566532538922	0.0571361757896754	0.285722457973718	0.56883011030631	1.58469968467626	0.355342546666801	0.157824048681785	0.0466043704331276	0.387985937150367	0.0116398200564306	0.109702495046562	0.0387165361792735	0.119417229613485	1.04718659408583	0.0202337511581557
2008220	10	1.13390626194825	0.0825821248574882	0.0187803197700812	0.0757338868168107	0.230887891432646	0.0548298139394078	0.185561262927047	0.51293242242944	1.47020086297068	0.299798177636198	0.157741988403718	0.0572240806192475	0.346951954085659	0.000477478192962681	0.101290442277888	0.0351066491806826	0.143356591864678	1.17584006227098	0.0322666390005328
2008220	11	1.05079414675139	0.0638898091812807	0.054811052640314	0.0569861085733782	0.171788693798034	0.0447480504985497	0.129077109094522	0.423980478327456	1.25166600405908	0.329153255092868	0.182930593411082	0.0702380311509972	0.273411663875679	0.000251104326270572	0.0943289632086702	0.0275383237906196	0.147022444190562	1.25495842114574	0.0297766243169221
2008220	12	1.01621010473684	0.0462603870914487	0.0635096967395276	0.0502776926681801	0.121194816339214	0.031513973621687	0.0990947304203093	0.363235981170117	0.778394293868809	0.336963449908715	0.222754573041164	0.0817374573146638	0.228008843987486	0.000281996238682803	0.0903365363897883	0.0239103568210358	0.132596626011097	1.35330704701994	0.0187246391345961
2008220	13	1.09253181199451	0.0333192618184365	0.0611983228367028	0.0412597369300386	0.0996115060106749	0.0241911354359117	0.0857888638454042	0.352695987148365	0.54613282691591	0.33798413457331	0.263974702518914	0.08485022401082	0.208694935441439	0.000361851362595621	0.0878325729826366	0.0215459048613417	0.100076552653271	1.16923337037359	0.0191378968399624
2008220	14	1.03012395808468	0.0236396394422543	0.0536146350433874	0.0323600926088595	0.0903730113381035	0.019118622577384	0.0806220801229262	0.341170143266513	0.517252089445052	0.265548339914411	0.266168068539576	0.0820543286294984	0.184207699761266	0.000391927851145569	0.0853695183514672	0.0190328434210032	0.0751905241868756	0.862118448248995	0.024091628271751
2008220	15	0.911454860420608	0.0189466630020261	0.0550518833102613	0.0255714310264453	0.0824314511255802	0.0145454745047251	0.0850154871974752	0.31381472491581	0.497686754818412	0.243944409681356	0.204688067304336	0.0891482552292994	0.155845083603952	0.000281677138030774	0.0817805151778449	0.0170192918601272	0.0603355553126801	0.693681919014392	0.0384745646538657
2008220	16	0.710023415177868	0.0168280135668085	0.0458307984237559	0.0211145908317707	0.0793078819504245	0.0126813066920781	0.0854980802393576	0.289900678501378	0.462593114563009	0.220242253156874	0.202769455800865	0.10520487245423	0.115114699330136	0.000177526614460288	0.0778125960852552	0.0160665007355573	0.0524337466554485	0.668084115389203	0.0718651650722804
2008220	17	0.321514239524284	0.0131721294519588	0.0375751459487882	0.0171177973519272	0.0841885288407398	0.0111558773623618	0.0831806295378065	0.294247864926897	0.405809881135563	0.234402575622139	0.264035255175512	0.110631201251201	0.0921800461150284	0.000126190845497854	0.0759526291270158	0.0143010466297062	0.0474912078787487	0.583974445024078	0.109299915225116
2008220	18	0.292152708276998	0.00659206860519282	0.0280572543371036	0.0141027371990404	0.0901146453929438	0.00961098538695887	0.0704757891873311	0.31723128558486	0.342134282290247	0.210475349514023	0.390287288673498	0.105897831790122	0.0724003867131767	0.000106614033208038	0.0674220677795373	0.0141072802723983	0.0455719589505689	0.531792131402504	0.127367752441855
2008220	19	0.458839896199862	0.00489162129904708	0.0190827581922724	0.0102014244655472	0.0909790721666701	0.00826384431992088	0.0500356476739554	0.143511209145838	0.282645769225842	0.189038356538747	0.519728328795621	0.098569674161485	0.0992017676822367	0.000124162829135595	0.0607131891246477	0.0143680045157037	0.04778519175277	0.446445068189305	0.131581455304054
2008220	20	0.37523832749903	0.00503797208149357	0.0121494339403033	0.00886225177148873	0.0864716079390636	0.00707264012444802	0.0230992986576163	0.152938828934429	0.208105991593656	0.20247794023286	0.727890807620694	0.0953529038346276	0.108830772696134	0.000205090647001539	0.0525039060965792	0.014530434694913	0.050839895724118	0.312689884531982	0.161303982043348
2008220	21	0.440978531683279	0.00607213201225518	0.00418475944639642	0.00895184220155669	0.078996855268253	0.00587530595835022	0.00612822872788784	0.193516025165395	0.183093820145176	0.251789703856183	1.13719356140958	0.0914331055924506	0.107000682361757	0.000312152443709113	0.0444669696702666	0.0147295814846683	0.0498640661338931	0.202096341890475	0.308330373549228
2008220	22	0.335406102525504	0.0107119465018756	0.00433899267394607	0.00793572163774698	0.0645437604963931	0.00588780154261111	0.00234462786500125	0.196466005241209	0.300020244670823	0.279781080476583	1.18236455843241	0.083736970617832	0.126716757309374	0.000475153125195639	0.0393397367738016	0.0148916604236731	0.0499739635185663	0.198861442762938	0.460310467881161
2008220	23	0.527794623176916	0.01761761492254	0.0122366644742501	0.00577869245283937	0.0582108937303897	0.00931772045506277	0.00174169918114672	0.229087195113114	0.623420038953866	0.314645814213768	1.1563701603678	0.0747810899344639	0.12698270791318	0.000729477112164169	0.0336647100650573	0.0155022463978422	0.0510204678778643	0.229192915781174	0.588362973974027
2008221	0	0.697185008505328	0.0113145880258361	0.0371487042547627	0.0056362516138319	0.103495375698554	0.0170127018360158	0.0152262025539979	0.294713701150328	0.344313787611584	0.564290525933799	0.990912298690099	0.0681348250598868	0.0430786228016797	0.000944366088338621	0.0296038734980064	0.0163017251818822	0.0514213975299457	0.254028838407418	0.649686460019061
2008221	1	0.468381097160789	0.00467075669261157	0.0590512419231502	0.010791657244701	0.120021390057989	0.0145488706803804	0.0596600221737649	0.28792588547476	0.775384035930519	0.224566441721554	0.846832851917086	0.0573053136047667	0.0192090501395922	0.00115241247545048	0.0281463748170993	0.0174084479187266	0.0505951392540296	0.113608376947426	0.699220860655538
2008221	2	0.411992314196583	0.0320957223571278	0.0781777446937674	0.0118313459019254	0.136255346564395	0.00960366905802966	0.0993422834504194	0.302744493653319	1.13908097496273	0.0533104662871857	0.846900923687159	0.0570188959006392	0.0171045802145586	0.00136408579797784	0.0263858021774425	0.0177852895876358	0.0550334506307273	0.0446391385419204	0.786948272849159
2008221	3	0.501682924207817	0.0688001572532209	0.144031605555929	0.0153190966523595	0.150902497512433	0.00731241924238333	0.129300976248325	0.371610919498204	0.637006199390634	0.0240857563136691	0.774286110542769	0.0566064833382076	0.0126429988434546	0.00142264688602029	0.022851206431597	0.0176376256744453	0.059982631361402	0.654818869900348	0.832177546836617
2008221	4	1.09398528026198	0.0958598252664384	0.298942782776482	0.0120715289845806	0.145786382383594	0.0057454343746766	0.163611538642638	0.526927808088002	0.457805155779691	0.0209090882480521	0.568534602480059	0.110044985174955	0.00593346662122658	0.00131972383865423	0.0195012893608786	0.0174271839807083	0.0566996339486275	0.63208666321677	0.813216698738267
2008221	5	1.92599176058528	0.127680154141558	0.364716798647568	0.012437423588451	0.158545101733216	0.00982079616042106	0.173076859156077	0.696199809600034	0.321107264425933	0.0623542997070654	0.460744723155011	0.176256141099402	0.00532207740506492	0.00109059188491024	0.0133106378352826	0.0171457604680358	0.0538804027933482	0.469124876524079	0.7079383379328
2008221	6	1.9388532714642	0.199080088983304	0.340862982665446	0.0317586554027406	0.223130619593344	0.0258696235827159	0.158523173297736	0.694670036964879	0.254309930412729	0.0820838115960441	0.524129529975771	0.240472243777662	0.0110154471198373	0.000874216971856751	0.0107133199080662	0.0169097888841911	0.0499079615272728	0.423891115906792	0.517339548716417
2008221	7	1.80004778983713	0.269227449380226	0.30661120904545	0.0620934846524178	0.352557974625437	0.0411933314079058	0.13992451815623	0.683191253300744	0.250756768188555	0.108190198921584	0.793850407491321	0.307250634889257	0.0175224611898813	0.000993976865116368	0.0149949140198545	0.0153636874099849	0.0548138636844322	0.483601978877938	0.380265369197608
2008221	8	1.42352806279293	0.282209335896843	0.230899785651297	0.081610371867012	0.416279825547572	0.0396436109347595	0.00640068293056885	0.809886066936343	0.290405690559618	0.242198227723303	1.20359462953046	0.329872146450071	0.0176879357674888	0.00248571962137938	0.0210042981224405	0.0139500716305979	0.0560289955771974	0.539100704325403	0.389089981937373
2008221	9	1.3012249904754	0.222305885811231	0.165451400710345	0.0937353478213399	0.432148303289324	0.025785098252529	0.00518521623915821	0.883983642023932	0.352773861440736	0.464298787709933	1.56544003627032	0.312511717397458	0.0141322064919469	0.00417773038325807	0.0267236910423817	0.0128002549487773	0.0568685929419405	0.580661003531784	0.485478313695202
2008221	10	1.29682326654737	0.166220435996976	0.159256826190891	0.110685410014606	0.50664903144067	0.026661078418743	0.030380273858049	0.785148748833285	0.338971375111791	0.879873378791358	1.65743796759732	0.268937313066761	0.00962709358600972	0.00499845155398655	0.0267071510777091	0.0104948073010829	0.0677276915404186	0.513341076305234	0.388963864788478
2008221	11	1.35429846616464	0.100480948237549	0.17174633603923	0.136813521365615	0.614404800320799	0.127153025313345	0.111272178431569	0.696610320113081	0.630670819186304	1.14702141964311	2.1225417936938	0.214865731153194	0.0085685640894275	0.00767739665091341	0.0267197730308932	0.00627070133449852	0.0634146584225564	0.434298496408186	1.08799809813419
2008221	12	1.71867281200651	0.0669010059429358	0.152724021130276	0.144461576664495	0.602193131327567	0.187783336713027	0.377334879285638	0.366571739286698	1.26026321319258	1.22983280403754	2.42737537989992	0.166438402488665	0.0079172868057829	0.0125733216602909	0.0262984632665441	0.00375461679415589	0.054625569961229	0.487670598784164	4.02824647618957
2008221	13	1.69371876152631	0.0589396553589329	0.108064293552033	0.124044089243538	0.669135450962808	0.13599623526047	0.61785986596883	0.286896933060258	0.879699919793467	1.12620828785634	2.16516356948185	0.11555066379786	0.00811770283975528	0.0151700341270027	0.0266373371242658	0.00529697706885469	0.0747951582737219	0.497189645833024	5.40071452028609
2008221	14	1.4728235701748	0.102133737367079	0.0409783027162123	0.0877869718609637	0.544658417054916	0.0788982862255881	0.7366376890236	0.293534581695316	1.08066806541454	0.907605776191897	1.99213296646079	0.103737036538703	0.00996390971581676	0.0144217579340677	0.0250203845431038	0.0126600857114308	0.0920567378062118	0.509227511042933	4.92449844727253
2008221	15	2.11130058444114	0.144467202781509	0.0156327755420883	0.0575119003429657	0.364829644075059	0.0229936361030472	0.999292971447338	0.35702532708656	1.37220727604144	0.700515441997255	1.20356735211429	0.10306125255782	0.00970419126557889	0.0130251452057756	0.0223917767157898	0.0510788351601864	0.0955767791250887	0.447384491718239	4.8469285496664
2008221	16	3.63117586288444	0.160581153399707	0.0127562900421037	0.045452937860174	0.48763604748834	0.0128364042669015	0.999942072291236	0.494410960097875	1.2324452121096	0.568923975989207	0.603783976118586	0.0872397729678923	0.00813721140805356	0.0153865111013942	0.0194391858431708	0.0781424174564919	0.0919966480617278	0.39135105834979	4.32395228823941
2008221	17	4.91669005606083	0.326726279282946	0.0223066695626595	0.0506693025390141	0.515973086755068	0.027746262778124	0.850197915902871	0.536034992689394	1.16485769269124	0.723112840390687	0.565612096168208	0.0714263894042523	0.00751302314322119	0.0228169895325822	0.0172587947349445	0.0703534128833742	0.099744669898563	0.355843852471678	3.72615065646455
2008221	18	6.10297672180869	0.460396337075849	0.0401955183607646	0.0684996125554487	0.595141673877643	0.0293794341851328	0.60680558712477	0.569360045798262	1.09160453846463	1.89795615118619	0.507075711066345	0.0595274122989848	0.00813426569707806	0.0298352430017977	0.0161609679306867	0.0688075521953436	0.135398025816681	0.368043837005402	3.12372206370739
2008221	19	6.6993842797762	0.363865647506268	0.0584780306425018	0.0635400946533448	0.624720953048343	0.0250472479352466	0.463753531336398	0.630413258331429	1.10598024547781	3.13856732495831	0.441289044825164	0.0337616546521219	0.0144281571226114	0.0463121205379899	0.014455308561844	0.0760753063340936	0.201247375269927	0.365953119178993	2.96293573935619
2008221	20	7.28940122061261	0.587740119526336	0.0625108915822927	0.114192074701583	0.620197408828807	0.0473387172354791	0.508777593760738	0.59530803530231	1.22041590951502	3.47531668265144	0.466581869337792	0.0352633397410732	0.028348289671963	0.0630094597376266	0.0127010727405256	0.0772714120271504	0.319524676558574	0.393282208351446	2.88056782322616
2008221	21	7.35544495097847	1.54920603362621	0.0610308930241393	0.226692015768518	0.74917964125368	0.206561215082169	1.00246199253443	0.500062076519942	1.25848361926971	3.42479399239464	0.498823278793831	0.0640741635646616	0.0489912850687818	0.0752274176408272	0.00807721113132761	0.0451083073455652	0.502788103237055	0.392935998770951	2.75955539250903
2008221	22	7.15180023363373	2.66929580159908	0.0547165702564437	0.302380862870595	0.828796945424933	0.321034580257949	1.32557031076154	0.553601682701305	1.17910201368184	3.46232978498723	0.475841891590417	0.104486708701179	0.0639537684567635	0.0769091584960032	0.00605028882712732	0.0194588000442975	0.804499529496358	0.400994029269258	2.54280390373697
2008221	23	7.25112605535913	2.97201177662307	0.049419996505349	0.288791566069403	0.740563558511331	0.254307761082588	1.39064409757484	1.447525263022	1.13265007929696	4.03752049866195	0.447917284869921	0.15393638452804	0.0749792174563825	0.0750365749298186	0.00267925075288458	0.0143874676982611	0.943879609129961	0.374016577130686	2.29092823136589
2008222	0	7.47707898619853	3.11206499705863	0.0493744768129489	0.283426903984912	0.57907285197918	0.394518708153465	1.35777825703329	2.30850299863843	0.884313256763347	5.10283655750606	0.332715797322022	0.208582119423151	0.0827102753147026	0.0696415192132822	0.00212258309890437	0.0142411473074271	1.08359392134472	0.383716331817856	2.19115114761537
2008222	1	7.10146716026799	3.26341155847814	0.0531502888423334	0.305838399096916	0.553479145700029	0.903532737952327	1.20851073178691	2.66941687949739	0.736998532966486	4.90688430444223	0.290890395913817	0.233219635758163	0.091360414131882	0.0645115118515363	0.0127144671860426	0.01390646097586	0.890483540129008	0.379215954647729	2.16483789805592
2008222	2	6.97981676384415	3.21930008667995	0.072288473392659	0.329326291389895	0.780146138295021	1.19674925723141	1.83851694714264	2.9115650485876	0.830905231048032	5.62751747027168	0.511091652868281	0.261028920471058	0.114046938012455	0.0613395457894286	0.047054717938608	0.057067761610612	0.638857179536701	0.392991949166156	1.87303679314197
2008222	3	6.75490469023941	3.09070969601064	0.0773520483818445	0.621395338081261	1.18673305423079	1.55132535228109	2.31989218775389	3.17714293296254	0.849026058391542	5.63194396036611	0.577942432439779	0.267855735740811	0.140835049634315	0.0595419447179537	0.0637399193877746	0.153464155394529	0.617115176719215	0.430063245013387	1.50653038720914
2008222	4	6.40196572939855	2.88039252653795	0.0597029403212839	1.24394639365241	1.64329928154657	1.65428294603086	2.81335791493145	3.15074951176606	0.827158160152174	5.20417669274463	0.499495223906714	0.245380472490025	0.185204411244283	0.0586527371932007	0.0524814463156111	0.105876725743571	0.58547409343607	0.451637558205834	1.18127663858313
2008222	5	5.82880620655023	2.55377259050699	0.0499825174057231	1.61022971545443	1.92250278720735	1.60968059321213	3.313864084686	3.37524916265532	0.794028168572315	4.67120539500103	0.551405095498643	0.239448592711506	0.245080389354288	0.0587013555807717	0.0382677197589631	0.0680333148917007	0.513382109368606	0.48012041235341	0.970415880741077
2008222	6	5.17585167347745	2.05543456544969	0.128433954358154	1.66105921501257	1.9145450858251	1.64193142632913	3.43927514673426	3.56993330214147	0.738308834291648	4.03868000382177	0.539657661716286	0.216989836118625	0.267728997258366	0.0750529171312625	0.0218311394535648	0.0457067505332126	0.468695931202549	0.494237552587544	0.871964761189311
2008222	7	4.68547483364195	1.56494947890931	0.214798843941076	1.55222643168001	1.90926199725592	1.50389462840345	3.24549113709347	3.41369543270711	0.699812235404315	3.8342334075889	0.542730291442961	0.287460490062216	0.208760853265053	0.0779354287567337	0.012519074721951	0.1021777641727	0.403594726389534	0.513853992829487	0.668514123192384
2008222	8	4.37156833570498	1.41999632255277	0.217037041333932	1.58953810279494	2.24203114993041	1.38386562437514	3.07406088204248	2.93075582636344	0.821906817956076	3.57193471095898	0.628607270989951	0.378962322737722	0.204613792010449	0.0688404970918456	0.014047728058798	0.231391679241515	0.355710281740724	0.535629689557969	0.453953018922921
2008222	9	4.08769677752491	1.38638700035347	0.194564548732388	1.66916259692595	2.61481610085592	1.27267149958543	2.7792822178816	2.53579235052257	1.20937595651254	3.23290181419174	0.806720023252505	0.423166615772284	0.163308849399609	0.059637812417053	0.0232018185390196	0.411616862263832	0.265647623346899	0.580115747593055	0.301221174041719
2008222	10	3.74189563215005	1.22032973635016	0.159173680589693	1.69349362746537	2.37753042924875	1.09996111403774	2.46595938829516	2.34120276513888	2.21214830467034	3.07865575875912	0.94191046532019	0.441928306543684	0.178928822308637	0.0554451255592025	0.0306238963658915	0.509679262503574	0.212273576722388	0.570665467883932	0.257935593713544
2008222	11	3.55373910915206	1.08894129828013	0.133864889792187	1.73962664938189	2.0329969916984	1.06034702287023	2.33849582231798	2.3217038779937	2.8786200807319	2.9356360213505	0.934645067446002	0.387081861544804	0.220807268077326	0.050190033007911	0.0513904487616973	0.52409765593123	0.198490616290166	1.06246494722181	0.308156056063771
2008222	12	3.39706759020213	0.845768737078364	0.110360941127633	1.79149739802094	1.87561484537899	0.74573803484899	2.08954723318602	2.47738269874119	2.82212753650952	2.6130258613864	0.789014885327804	0.265238145179944	0.174839102346501	0.0419483051868391	0.0941325586880266	0.491650841125931	0.256547162900891	2.38785960111411	0.42226841653535
2008222	13	3.18379277736035	0.62800710331483	0.0890624494303389	1.62644949725888	1.99479074318146	0.384402427139421	1.85601266658877	2.50972588092436	2.83022741018751	2.06276021015893	0.683962919277946	0.0705180280116951	0.113969234716966	0.0347532312479254	0.150201094542327	0.449495358453895	0.359605196043448	2.55512458513888	0.427838539007032
2008222	14	2.62002673062452	0.509754454033263	0.0814717728974167	1.29820495489884	2.37945735364621	0.268756352070876	1.67021123735049	2.43902497166218	2.87170411853156	1.55064495682923	0.608194253664517	0.00170468285134491	0.0795009652632472	0.0286820609020726	0.179447441764235	0.424662082256632	0.537579192437944	2.63676980468311	0.392856021485525
2008222	15	2.01317084345282	0.412986390080992	0.0692470063020385	1.06477510948779	2.48364974763016	0.217150465229204	1.23248389062779	2.38315323542615	2.62331633097698	1.5798580468508	0.498735719040131	3.96295606035842e-05	0.0548554269829313	0.0243584910318657	0.16669203083197	0.474146857298827	1.02187599794294	2.64888495452629	0.330641985676635
2008222	16	1.86280107370647	0.31403434936291	0.0576701773301646	0.863227234107555	2.36398814115145	0.181837881052415	0.972957192730653	2.35509126778362	2.47621260677979	1.95580717587609	0.397232434221977	5.20581358944659e-05	0.0407802017484583	0.0220234944955091	0.143034822129657	0.46646362091331	1.49659836398561	2.66545981137954	0.240613700494516
2008222	17	2.0382043672516	0.250393921110814	0.0466811822356928	0.705337921511517	2.26105934925717	0.149971613807972	1.01536625009082	2.3193356818034	2.12424027304844	1.79610582769118	0.321929724913292	0.00188466735617703	0.0352074482666698	0.020416980763379	0.121729381701074	0.3814787650494	1.55355442105281	2.91515158422584	0.171488201810324
2008222	18	2.05772717778717	0.222901209920229	0.0425765452466585	0.534951155863438	2.13033763088875	0.130880657632399	1.1994042216758	2.12874549013995	1.69840913571908	1.34927751013333	0.264359537682022	0.0101431596419505	0.0344648500366079	0.0190495682809496	0.10128680604917	0.27714190379527	1.35866705779391	3.1075821741083	0.149882716623985
2008222	19	1.20833794308352	0.200138655684598	0.0458392881810536	0.401750212037912	2.0582048086991	0.114883090783808	0.953385486355913	1.73141267890566	1.35211209190267	1.23136766398664	0.212640381016456	0.0177871142312871	0.0343395210193765	0.0179172393356684	0.0873632320601243	0.192976653103748	1.06503399247296	3.03569962815232	0.127174315254449
2008222	20	1.04460885717556	0.161025230180443	0.0499880012503625	0.312852355348747	2.02752645344043	0.119697795701293	0.748247224266687	1.45135496983937	1.32670033260196	1.41966095741768	0.178275152396442	0.0245807824054655	0.0313538243185849	0.0172319461958887	0.0717814036456835	0.113168000854572	0.971917989628735	2.39330182321857	0.106161740395643
2008222	21	1.74817206294455	0.100253628156602	0.0508660446180541	0.248778156910723	1.80409099525354	0.125524023328329	0.776197700721877	1.38463074142673	1.59436145538141	1.67295499572119	0.148410007334919	0.0289823047593118	0.0413708312514024	0.0174575523313	0.0630730692320005	0.0866306466589817	0.951142489487021	1.604352000828	0.0919644706655506
2008222	22	3.41857717773286	0.0612923765208736	0.0485439423719558	0.209777070091592	1.46925721938183	0.131443047200917	0.968744587767493	1.07939114770322	1.4715400138651	1.3410278531082	0.142089851710723	0.0279842889786328	0.131753727311609	0.0202452438957847	0.0727837077030546	0.0796197017133049	0.927071543435023	1.66031373474034	0.0926005602155052
2008222	23	2.9979098181362	0.0489023488354735	0.0435362546894901	0.162283591943174	1.17806118079982	0.120767204170689	0.736111662480394	0.526722132826877	1.16779008033522	1.31637689151484	0.143024042009222	0.0259197472528274	0.164542856723014	0.0272026032222609	0.0902813603130624	0.0744135963053223	0.939979633730858	1.96457158427421	0.113725188030889
2008223	0	1.76623372341974	0.0409663559919254	0.037372087836313	0.131731698277197	0.790990861286117	0.111102349846102	0.459777359562231	0.378363833830962	1.09271681570893	0.611645713843872	0.149587903621328	0.022825465035033	0.103698560333487	0.034062179215114	0.1022638152634	0.0705717023678991	0.928263863338073	1.70444186127523	0.12940846437802
2008223	1	1.79972908563438	0.0365105870426005	0.031412758310728	0.128752975122836	0.510441236667478	0.0994887890224985	0.795421567260598	0.391266349918618	1.32422274292912	0.362722504275961	0.154277159833278	0.0207717220352604	0.109059447798312	0.0343947601674956	0.104429952155139	0.0681161467798728	0.918582642104061	1.32030760335157	0.114658357734316
2008223	2	2.7739492518293	0.0427524911917902	0.0265128947662127	0.10442957244785	0.302442565335076	0.0972879274093873	0.893242364752859	0.523311117802154	1.54498371465269	0.290646930518385	0.151336136984458	0.0194187501586296	0.0604490527554042	0.027280398099278	0.105871291347365	0.0667676119968874	0.975903790338382	1.32421882623938	0.104494468002957
2008223	3	5.38426742532617	0.067381397656299	0.0242145920246901	0.0677338665188629	0.22640867337696	0.0975477883033503	0.252847235340503	0.549265198375853	0.913640476096733	0.255616966070794	0.133476846188618	0.0126996447430885	0.0351513196199035	0.0179246790675884	0.10709535723788	0.0660284114680399	1.15124258104201	1.40483848986191	0.108512737575589
2008223	4	5.10248011472704	0.0792608723470851	0.0223149523747614	0.052327478774172	0.214492283036804	0.09510619652691	0.0749811420501574	0.489832575023466	0.901757327453465	0.0866413382911597	0.11572813634835	0.0187422879896886	0.0146462942147709	0.0129580366217328	0.103728011225898	0.0700826710326468	1.23852576411286	0.717051663723461	0.129156831778525
2008223	5	4.60812114749051	0.0748300150741237	0.0220032496107295	0.0493090112308588	0.204382350933676	0.0848839767884954	0.0548077484879497	0.529803191649209	0.826377430492182	0.347716285475518	0.0980285903111403	0.0341258628989189	0.0020859797899891	0.0105271841538946	0.0815073769463885	0.0748241382696317	0.995911102079376	0.505437209789235	0.110014842278908
2008223	6	3.37305140849715	0.0722722633633073	0.0215918524508551	0.0558886012363712	0.19405068454002	0.0825332911180206	0.167651786913051	0.551208099959374	0.654827719791478	2.87421532324329	0.0847731939048704	0.0472622409172875	0.00180903910674772	0.0092751726175133	0.0645543282628554	0.0919856536747533	0.644442280900959	0.446852265304885	0.0976032587711504
2008223	7	0.694214604719468	0.0792771843041518	0.0186713075133976	0.0694442524767735	0.194716218680391	0.0995441178223283	1.03151404737929	0.546584789504024	0.53012027308294	4.00494166629358	0.0705628872064399	0.0684342034903048	0.00292652896573016	0.0129194508660368	0.0690277434818946	0.106110712707143	0.345231334160706	0.775040604029406	0.115150379271062
2008223	8	2.89718654986792	0.0788410315110381	0.0183382312462424	0.0780627443918938	0.20677462074892	0.102034844142186	1.7069549196007	0.735340974653233	1.39142077868564	5.36225777507033	0.0586793969257615	0.078994964629689	0.00288376351749145	0.0413505347176853	0.114759377625615	0.0956163421719892	0.200787924560498	0.798324398292951	0.453604929125115
2008223	9	4.93666342197073	0.0748221416758232	0.0243800713860695	0.0822812289891407	0.228153543702901	0.0935570421862701	2.38673546310127	0.697806356829528	2.3738981935595	4.58352839631512	0.0516584884722777	0.0698666866275008	0.000951591510461852	0.100931311681595	0.339999083526907	0.0889434670726978	0.162767471992101	1.40935973954346	0.797492379848407
2008223	10	3.4482460216333	0.0707029983229413	0.0296743792380896	0.0932780911379554	0.236206650036919	0.0807805332704244	2.35623374354191	0.615217031994321	3.05373940456267	3.24475429902602	0.0515105392982863	0.0720709626168047	0.00355975994994282	0.112314692886312	0.444269902726163	0.0817069828920302	0.167292946813864	2.36519256383433	0.501494913278947
2008223	11	2.9186437822854	0.0690785448347046	0.0295565136958853	0.104045249807522	0.246278081076242	0.0632843785616597	1.76744382958054	0.603345517715884	3.24093583919888	2.49647314447477	0.0822455746181407	0.0904379106931045	0.0101929948472908	0.0977392898254162	0.443223842006199	0.0710297601496651	0.165174730085841	2.10374416746056	0.176270145316534
2008223	12	2.84679843383807	0.0668437276885938	0.0266744876282845	0.104329152316513	0.256033267869701	0.0479362001869415	1.17349371985919	0.556669793392384	2.73101402865483	0.849141720416265	0.182785886398168	0.0999255415779733	0.010106657391281	0.0234552216587887	0.403591240786938	0.0603747718989641	0.15212238834511	3.41539996233163	0.101786069587269
2008223	13	1.95915657118006	0.0589644820888029	0.0239492228048768	0.0941956203385772	0.262875403374716	0.0360903643852195	0.200231414014802	0.502157744496896	2.82407185516484	0.521280525327094	0.257653285420717	0.115416063958341	0.00989899878655799	0.00769436836063288	0.36493204064383	0.0500038075592601	0.142094354282126	3.33463989480162	0.183190760832001
2008223	14	2.01410514950721	0.0522413012907852	0.0221572810773709	0.0835430243072261	0.239765429274333	0.0291892085902798	0.0185201715341512	0.489238517953899	2.58719547476742	1.38900223691875	0.264676348598332	0.148578214764397	0.0204366365239964	0.00259917424463759	0.330706585815804	0.0417165479127114	0.107638754944794	2.75483233722116	0.256353161462211
2008223	15	1.91612862676758	0.0488430332535251	0.0212635587944232	0.0700325927935928	0.215344594597502	0.0261774918505328	0.074795771014751	0.652911371705002	2.15861308452634	2.63042339478136	0.228644869611496	0.150900145736636	0.0605427840267328	0.000559162907084331	0.301232196224857	0.0362954468699276	0.094493843007694	1.84459557694184	0.531146248595575
2008223	16	1.60595704221575	0.0433956096025056	0.0211352056023743	0.0547737531400592	0.230517423099234	0.025652397302106	1.22002458209772	0.783669965126477	0.804133929520152	2.9083112234716	0.253005439605185	0.128831941648624	0.12553109091398	0.000257830298609449	0.277866909601395	0.0327923761977184	0.0912458886781205	0.746490182710886	0.737509930365218
2008223	17	1.78441724140345	0.0376530987940091	0.0212059754075333	0.0420015604591708	0.303901281368029	0.0268982164162822	1.70311256708096	0.996580371225306	0.673388787864442	2.79120858333891	0.35194167660189	0.056888175190437	0.29379760869298	0.00040454346319644	0.271228203779646	0.0304888706727779	0.0929799897024997	0.529943181785071	0.680271776284002
2008223	18	2.47204813597718	0.0332556601469706	0.0211840842511437	0.0373270486254131	0.219169987665761	0.0306103895939425	1.64318716626284	0.951173478942872	1.30159136678904	2.47893979172009	0.467706266068748	0.0678406507115079	0.364624266544455	0.000837972048738382	0.228060213370519	0.0287476948000551	0.0933275975474991	1.02284673425128	0.657023543076359
2008223	19	2.15495623228916	0.0291668438086782	0.0200647816517081	0.0373340095926894	0.179864323890911	0.0323389063378962	1.37107429163483	0.960594202989263	1.62315837873204	2.2231329289671	0.545564452490053	0.18545509730538	0.400367925624396	0.00110179827783915	0.190565294851671	0.0274278241357888	0.0864714521429075	2.12911050936328	0.86267933332726
2008223	20	2.28472625717983	0.0275069801775741	0.0194651438017105	0.0381531777725338	0.251392679580457	0.032082629507308	1.19552207775127	0.990622442918502	1.56052015686993	2.26832017058925	0.547397938228401	0.379336947842581	0.599573096768175	0.000923301233900459	0.177848770907446	0.026606939923619	0.079996491846064	2.31886452143547	1.37666813687801
2008223	21	2.83723666944278	0.0350690762592007	0.0190865357118115	0.0351501235001447	0.405019861667765	0.0317025856801963	1.44031471758742	0.938734404275361	1.19349382012135	2.48006263334354	0.513118597473122	0.477192861029988	0.831075698880858	0.000754600026375996	0.173550840057461	0.0265625213832601	0.0810920975148872	2.20277968815985	1.83240752017781
2008223	22	3.07342465712676	0.219728261304768	0.0187695167956453	0.0349143744165401	0.49060028240448	0.0316678166835392	1.612362270417	0.974998447433746	1.05360290278328	2.00253269703844	0.386170856207553	0.480975430334949	0.837707019626554	0.000660050645623016	0.161973034573172	0.0265485517773068	0.079458176929739	2.00164881532561	1.89952477424273
2008223	23	3.77534738621288	0.305563443291977	0.0185515022447775	0.0332164597381854	0.455481718423014	0.0343429937479556	1.52196282780306	0.905905459956852	1.37538288433749	2.19624849444104	0.470993477817242	0.464553737481891	0.814089783063634	0.00219669766795317	0.169086980824976	0.0266663517896224	0.0787166251795029	1.88358223177036	1.71152644648793
2008224	0	4.0184711182887	0.28112746988674	0.0183947854552567	0.027378133842584	0.424104313334599	0.0373963672309679	1.83939761490855	0.747182315942015	1.49567691666158	2.67372700315147	0.958912156154881	0.437741156467008	0.744764991559583	0.0088537440041377	0.155717149801012	0.0263564856408908	0.075509918629409	1.90101300431736	1.5625471359208
2008224	1	3.70573350532743	0.203013690656774	0.0184227270986709	0.0312825222671472	0.418496170699556	0.0385600440487574	1.76523465104772	0.742386660083791	1.44481670770246	2.57027948361754	0.899765691443657	0.416041821291746	0.754128128018345	0.0158928929438734	0.156146233151719	0.0257765769913074	0.0681331914934157	2.06953822284746	1.4455288417866
2008224	2	3.12237050213644	0.166085812911311	0.0184514343192154	0.0943544916090161	0.394993926314707	0.038397974863566	1.7152354799794	0.758647404411011	1.64950167180049	2.93979458059146	0.180500957441724	0.375562175286006	0.453208440495812	0.0203972814696289	0.140098263370622	0.0252078723831977	0.0689935720529629	1.97740083076411	1.14720625260912
2008224	3	3.63796273187955	0.139360946721056	0.0181170980344993	0.191124394728156	0.37232774450902	0.0376810815711629	1.80013327443594	0.79816094274213	2.05876820025516	3.17020214698463	0.318093686330307	0.327839950310822	0.428648329309211	0.0370713661452977	0.125762458616887	0.0260345186348262	0.0746963548175924	1.90109071998044	0.98449143212217
2008224	4	3.6530224097202	0.13578263688819	0.0176380359533041	0.175648494631037	0.340663268329422	0.035691032656545	2.00787052247113	0.934829200448293	2.11389444436255	3.03849555899264	0.509130089836657	0.308426362483458	0.76037881058677	0.0860877576865216	0.115961127552355	0.0268236229776348	0.0871294625557497	2.21575809036894	1.01731565607696
2008224	5	3.75300084756132	0.229614547606299	0.0170842793271769	0.140863440466643	0.32342987259067	0.0279885887626923	2.25135417290771	1.25352549073698	2.49932726117998	3.5816406748479	0.328732012107622	0.291060369319525	0.645966004053738	0.171475661943072	0.117947684185882	0.0289221682011842	0.0853832146650124	2.39026822803741	0.803887389751605
2008224	6	3.28125019161174	0.314094267503296	0.0163775508485599	0.129715041262692	0.352341545600012	0.0215401583004784	2.40569734523317	1.40987403903241	2.4627947335834	3.74801964546591	0.659749774670178	0.262781663939439	1.15149839314972	0.205652638636829	0.121505342493387	0.0307713824033449	0.0611000337794243	2.61480651692408	0.578566431099646
2008224	7	2.62954308115587	0.500454193160434	0.0188864925725183	0.132778159156955	0.488538890388556	0.0186751605625311	2.5964486751059	1.50192531030655	2.51908645655521	3.44619672193924	0.875577264116409	0.23729297498695	1.7969978391047	0.239533908222548	0.110971170782227	0.0342086603869387	0.0812317177543376	2.8306527712433	0.723935935081278
2008224	8	2.7416150339078	0.755766446622098	0.0200311457074369	0.175656426316645	0.736076634687203	0.021972677816513	2.62477367169998	1.44956099969303	2.48284125519985	2.69090201906003	0.853708843251121	0.246910526626022	1.5275417618432	0.220909844224014	0.107037679007747	0.0278574815171088	0.163109496693077	2.9198151526271	0.641546888832706
2008224	9	2.98781761358833	0.821725541666232	0.0203789579845204	0.19861250366177	0.897711712131276	0.0521243899571902	2.19647587056659	1.47003712834073	2.49806389317159	2.54957822210948	0.800622296386239	0.258231399385222	0.76835318780137	0.177319776929484	0.0964859743839558	0.0277189128696403	0.186529233510489	3.05790180931076	0.692382163489223
2008224	10	2.8662359597006	0.726566923645957	0.0217857572655593	0.209149028422145	0.919537482220015	0.0644066421242611	1.67347946837359	2.05836458716925	2.43104924982507	2.56810383539719	0.745765295645121	0.202367302307307	1.07172770681667	0.166936877134569	0.0854227121548929	0.0260991466691875	0.176558539618207	3.01219816862082	0.77311268981193
2008224	11	2.78328386062527	0.583479914737376	0.0493971860325303	0.261617860634469	0.891730443129689	0.0726385673789507	1.70923911310638	1.92801479122876	2.30177176488664	2.17990936212596	0.640115072125562	0.244551774212474	1.19477679251399	0.221913274925563	0.0751505752476241	0.0218996916812408	0.175637550078158	2.74993437704401	0.699722082059224
2008224	12	2.32123754422748	0.408713941992526	0.0576063530903571	0.402252962720823	0.837658780767535	0.0631860466080987	1.56929359842564	1.68384508765656	1.84720172100251	1.74959482530221	0.596617946965128	0.28364137833129	1.00454938591784	0.356801802767032	0.066640423700702	0.0193508912362603	0.169973670288453	2.61204952107381	0.549994747863678
2008224	13	2.15875747132478	0.286313244342724	0.0514197130792587	0.435421193614873	0.772431449459086	0.0545276193273545	1.10532518478824	1.40260108922238	1.55025599590344	1.88555658066651	0.629004938997988	0.290431354978681	0.685402214604629	0.303778881233586	0.0601799706591036	0.0180452438311648	0.181685169656485	2.38328607384155	0.561668987339534
2008224	14	2.34241380632426	0.239770534310557	0.0451628489925104	0.384970983196863	0.707362726039245	0.0497798819984446	0.904378758583351	1.05109179487452	1.61964958903304	2.07975125562041	0.733762417854515	0.267594299339006	0.442279646238632	0.242346441927507	0.0541820626146967	0.0175276532463	0.23999974870328	2.05517497857077	0.678117613362555
2008224	15	2.33435260309534	0.193950740661108	0.0426704145995712	0.324317177398972	0.635016404066268	0.0498878155515838	0.889822051796402	0.790786482956129	1.68231625807986	2.34884567528301	0.868417536373852	0.212584368302399	0.301211888753693	0.188655607817091	0.0508470981385961	0.0174477361013238	0.279621353938163	1.72722251174408	0.723884203028573
2008224	16	2.23751242487806	0.161156008834722	0.0412431133739334	0.275370286823045	0.562534717272196	0.0510673779973727	1.07657603786083	0.635013954870269	1.25561079152256	2.327581295429	0.842128592245533	0.149344773693393	0.257315577596527	0.153960085978437	0.0492362704634591	0.0175158769239751	0.30070105535794	1.41832442883116	0.692668624830848
2008224	17	2.21959405919712	0.137984533593564	0.0393046609755827	0.243878068402117	0.511835769007385	0.0498601709621479	1.13391162923929	0.543242296208592	1.1030009386299	2.3008670067768	0.734209568177273	0.190160838183489	0.332046264588193	0.142972719079238	0.0473101413017235	0.0174551444652939	0.280187948485599	1.41584542249011	0.646136461151541
2008224	18	2.17480970033803	0.11273560109631	0.0376573484990216	0.204491539901872	0.426258997559729	0.0416194842382992	1.17132244457113	0.475117579139624	1.10321089462867	2.1735613498668	0.679984844434054	0.273402159184093	0.534610875673677	0.125636620059933	0.0442825913882341	0.0166352729161763	0.251044338945359	1.52350228652279	0.697306820838566
2008224	19	2.0955136518186	0.0966924610040419	0.0352455996715203	0.123804013623819	0.355942920800616	0.0350907436020762	1.29781780778921	0.401238397416387	1.15495564952762	2.10010102315362	0.670375954712562	0.320947421290848	0.822053776422831	0.0965864720336555	0.0411768320056584	0.0148816782328565	0.205246257393675	1.62731959268391	0.577897326491832
2008224	20	2.04135469379964	0.0939633376881679	0.0324076671885006	0.110689331534376	0.327590194275157	0.0353809599381761	1.40254992937436	0.345617135925263	1.22545255972983	2.09237666138305	0.724182078421336	0.335590374308	1.08239936245149	0.0719541464422493	0.0389368395408187	0.0132405354927112	0.167166822398526	1.75843058188107	0.602351037295119
2008224	21	2.03303332517802	0.0947924330348455	0.0300419695561538	0.103544349835586	0.325226244891123	0.0363176012788537	1.45603802001999	0.342629678608799	1.34793007182714	2.04869575127799	0.800296258923842	0.336807770274094	1.21010453078041	0.0534565782282123	0.0375700343419438	0.0126340799141092	0.144447169391811	1.83366562783693	0.491426649020623
2008224	22	1.99211343089742	0.0999130091524968	0.0280196478262245	0.0986240799477304	0.330435460372689	0.0375798434303023	1.42325721548546	0.355920467544328	1.45037809163814	1.96262218133464	0.86293427572031	0.347289986677814	1.19694997467947	0.0469228179341291	0.039735405344566	0.0129212977955362	0.134358763401296	1.83404400926385	0.436633957798459
2008224	23	1.95150220458024	0.0964715649927449	0.027929578345057	0.0977674380889386	0.354729269355625	0.0355199174718695	1.36939106787605	0.365473857657969	1.47685837855715	1.86326053120056	0.807342166484481	0.381101776048469	1.09186352712279	0.0552592478967447	0.0376072810818885	0.0130335987973096	0.137716354473002	1.8654051152809	0.381838757467546
2008225	0	1.96495534023678	0.0853235956555985	0.0251811127392998	0.101005918545081	0.377131248920917	0.0299311439018499	1.31860306586879	0.367902198896311	1.42215420630822	1.63721973257256	0.640796775762782	0.393000794312058	1.12102243679173	0.0535482719405068	0.035639984590252	0.0132678465684567	0.107839637145737	1.86076409195102	0.34786828804562
2008225	1	1.97031163621996	0.0682497094242145	0.0207878814858557	0.10871264851358	0.413541279313981	0.0248175432606158	1.06860356258781	0.380320459153409	1.30763710340452	1.4703512343059	0.671682705434179	0.413629932602689	1.21367554928542	0.0506359524494455	0.033953030174624	0.0140574629922393	0.103645515132359	1.82411743585561	0.365684923816102
2008225	2	1.66167472192304	0.0483698700479081	0.0158706734576273	0.0869083507359646	0.347724511224396	0.0187866366550215	0.951097509356695	0.364354507911335	1.15735303293465	1.35456622285299	0.632257183522702	0.448809818514285	1.21565024849624	0.0534858044015966	0.0316876376663058	0.0175593490637001	0.0980435682728561	1.76413776516394	0.26765758781316
2008225	3	1.16402132250219	0.0348546254400238	0.0120853149182559	0.0474510785234032	0.355233027243869	0.0139665803985036	0.889222623077318	0.376477552006757	0.994644916826264	1.28099822005383	0.60617970941716	0.482253425304946	1.26341073793538	0.058709657639736	0.0296115832500714	0.0273585592181297	0.0862010450368504	1.67263564242077	0.129182173310208
2008225	4	0.827192616995986	0.0291274686080472	0.0103071530605896	0.0326208251871889	0.407200008360975	0.014093353687485	0.931455671335557	0.385119085284961	0.817629238157322	1.23277093008455	0.595611525981267	0.500680051511388	1.31640939745037	0.0693777871972025	0.0286813826227696	0.0448602232903205	0.0783361211794835	1.50653819262441	0.0974127350877734
2008225	5	0.739482317480884	0.0268748144805351	0.00988083580100239	0.0292148087770042	0.445940022139877	0.0184922665986334	0.896106656195635	0.38989691977841	0.557185426019737	1.23857151715728	0.63295927366247	0.453878864477023	1.34630239067128	0.104276294340967	0.0251022318467289	0.0482075727899065	0.0663438359861613	1.27320780165462	0.0499026043832158
2008225	6	0.665468433996082	0.0244544619600192	0.0115669370122244	0.0237197848987953	0.432682051965308	0.0188595272796632	0.563501535478797	0.378216723050857	0.525862492578499	1.16005975628137	0.733204089027667	0.453535971529345	1.29817775395805	0.157193925360973	0.0190954917653078	0.0391306445588667	0.05363425502309	0.945647550626995	0.0134217387854688
2008225	7	0.645647322145095	0.0218540462377804	0.0427563667962043	0.014348300826761	0.337971745223864	0.017455818044867	0.23365021683021	0.419300433317634	0.642737144294375	0.827933023480507	0.833479383174555	0.495504386199885	1.55138887296394	0.207923854990084	0.0153156539384302	0.0272340191930356	0.0275989449202055	0.397498484071159	0.00637539289106752
2008225	8	0.856229666226464	0.0192438400035093	0.0416789883500607	0.0131845977847361	0.212681546752228	0.0155109032975966	0.218690587594539	0.440497441910116	0.69470726022901	0.347489069300002	0.910732596603066	0.502781004750067	1.69472671557906	0.406803254966243	0.0192677095437029	0.0226999652715306	0.0215547037577393	0.369734177257602	0.00579866020767352
2008225	9	0.892784136113118	0.018049647973971	0.0305347034213417	0.0168881732720328	0.125360346946307	0.0133817401102146	0.251235854377799	0.357421583837062	0.829458990192188	0.198873395618834	0.923283005944413	0.486478119750395	1.22038915416248	0.42723492709688	0.0227263227231129	0.021516255415795	0.0225885434651059	0.642300306339047	0.000292819672554438
2008225	10	0.671689638536362	0.0155491131565598	0.0446582025604957	0.0174979007601674	0.0919195980167104	0.0118504774092956	0.27890676280814	0.26094220005963	0.815042130038423	0.0943417008709215	0.868995405217301	0.446687851307351	0.848982451193761	0.423019356519855	0.0241980557488464	0.0200864966330849	0.032347240695287	0.649370390243654	0.0358289802791218
2008225	11	0.581050137891093	0.0136005167283372	0.0543282455513037	0.0160755930094735	0.0742678525807621	0.0166809686373726	0.276358394526112	0.257211630290821	0.729048627784417	0.0748932906924186	0.777017492606364	0.407998311774654	0.71103493067184	0.304502509409085	0.0242249529164865	0.0174259573025983	0.0579195259465516	0.629846973528164	0.59127995864116
2008225	12	0.512698088908731	0.0117912619369581	0.0303674849727037	0.0271878782863695	0.0822814719334317	0.0161985126898091	0.179787888686384	0.317023786022857	0.608181555887491	0.0544748095726189	0.656496563438637	0.375129653495989	0.788612600222555	0.258584282553282	0.0232555437504864	0.0173109712951179	0.0919541795976413	0.516798043518901	1.07885993952715
2008225	13	0.481507838805364	0.0192226953800654	0.0154963728768906	0.0217551921044881	0.107048350856374	0.0295868223170354	0.0787655484634091	0.340952822413618	0.59778395583193	0.0368546878336451	0.533910122559396	0.348021490294088	0.495326051684421	0.179818203724987	0.0222191604409487	0.0199250934247035	0.0694280288965681	0.394026198110583	2.06539137404695
2008225	14	0.360553714060437	0.00873024341631823	0.00257191904574614	0.0127768659672817	0.0996419243304461	0.0415251774860489	0.0882595584898335	0.303455098387478	0.60198033508657	0.0769910606870892	0.43883574581923	0.332031469268743	0.175587061464505	0.153774548852986	0.0211268701297124	0.0185630514263762	0.0845779257950396	0.362298855721085	2.41944408725383
2008225	15	0.326608018854682	0.00489827836867426	0.00126172556933283	0.0238430653303991	0.0805702361784709	0.0361331954881795	0.190529107262637	0.234025097544662	0.560971915879271	0.0870888715808753	0.408391076873762	0.332008686267969	0.259590787382615	0.166442648585317	0.0198862664731376	0.0153426462927087	0.0911274663786985	0.338594191208953	2.65087036579142
2008225	16	1.04809153800074	0.00693338358467375	0.00352520269389969	0.0286431658932568	0.0860591577873138	0.0298181436755269	0.2210911133436	0.231622592031981	0.593724719563431	0.0925097442603753	0.396691080620296	0.336709154647889	0.639495431661294	0.161715681738538	0.0185089276330522	0.0145298924485455	0.0863840139390659	0.139289719512624	1.68465547847248
2008225	17	4.1527098312179	0.06966511712504	0.0182933673085898	0.0255638648280195	0.0968635839990566	0.027617600226275	0.0413636466392908	0.395826228028422	0.32518194245848	0.0613547203807145	0.380753999574162	0.327996123363422	0.703501112592327	0.135735692718434	0.0165743066246812	0.0147462577456175	0.0985954207042476	0.156723872548352	0.991772706034596
2008225	18	6.01989917016394	0.236357961005911	0.0461089185304934	0.0284114189225305	0.131824235626994	0.0333033993811899	0.00707652482050679	0.739772921782457	0.509811672536129	0.585644621738662	0.325740590203745	0.266267286054159	0.374820631561089	0.11197412717866	0.0150733002290382	0.0138652651987887	0.123355483695959	0.186928476784549	0.763194737757811
2008225	19	6.19757677244518	0.233240949469597	0.140329489811973	0.0282159096016364	0.273897340739009	0.0243181517258874	1.20200729927045	0.781885070843481	0.68157034373076	3.7872576878228	0.253620758250079	0.240610019961353	0.154756920719113	0.126652466017006	0.0136144106633443	0.0129769211711756	0.124174934902145	0.167385783313662	0.617029633118245
2008225	20	6.19617698680582	0.144118142830261	0.189627875498465	0.0199045258845832	0.439510663997172	0.00668801767598939	3.2024227968473	1.22445234328092	1.51452973847905	4.5356457443158	0.227662852629439	0.184913670688976	0.166386734628805	0.112964359486256	0.0118075843141095	0.0126523622306429	0.108238596074749	0.365899251323492	0.514820605586398
2008225	21	6.72221247587575	0.0993051302973912	0.148505377095673	0.0642494401851107	0.450404745639825	0.00620938546736317	3.59492118635831	1.32705046510209	2.87013707471194	5.38215534512396	0.210322472092328	0.150444030413316	0.288502537014583	0.0952281039728741	0.0104986011130607	0.0121895116532796	0.0785651619590286	1.90558350669895	0.592293438939065
2008225	22	7.18830127833589	0.0700355038309208	0.13554055289958	0.155497209717591	0.41748864724263	0.0249321529151541	3.62881911619024	1.34925531744983	3.88084920846759	5.07777435101415	0.23331762282596	0.130136344299278	0.34191669477472	0.0728309555675307	0.00957531378414736	0.0117884638673098	0.0697000034573239	3.58326354533025	0.763210617816622
2008225	23	7.59399910735403	0.0547734230147187	0.208513726226981	0.139738870232096	0.483583423526844	0.0694928899178641	3.5300705260735	1.16347281519227	3.99043562248923	4.62099211476398	0.268043324818451	0.118116330858482	0.162378922087611	0.0796677030278575	0.00836793298002171	0.0119488494285707	0.0767251766007023	4.04298704734017	0.930836544938137
2008226	0	8.17587661754487	0.0519344963143941	0.300771472937361	0.0988140417958177	0.500347334164303	0.121328411708394	3.67620462741365	0.895679867027856	3.56943543019546	4.72130339444096	0.321654227826878	0.124557783835599	0.225805751312862	0.0798519014219242	0.00757380329840519	0.0124523286899916	0.0965456405402682	3.8933867062595	1.15870958852109
2008226	1	8.26122917214468	0.0615162587220506	0.379118552008997	0.065061517488326	0.404256688058752	0.120673724174636	4.06313303885886	0.568519028721242	3.73504280441709	4.53596157924905	0.361355680759347	0.128282623956614	2.09935408967103	0.045669836475781	0.00695455109351933	0.0089601699293493	0.03863372313294	3.61100169544969	1.2470705371697
2008226	2	8.10730853217535	0.0986706540742421	0.377667728695166	0.0501462540706963	0.212903220941498	0.110464727383303	4.53484812067644	0.507340724517696	3.77346281314864	4.15285555727656	0.479814047645674	0.121575317286567	4.14361945233883	0.0181235993937534	0.00640619470270512	0.0043626502226344	0.0231940957654399	3.65039183774787	1.71844298266481
2008226	3	7.95635271783779	0.142551194998015	0.362903035074626	0.0476658506213164	0.174890340151065	0.144592064181313	5.05908469046762	0.52078245514173	4.22785668259856	5.57402470007163	0.547074471649249	0.115441031959297	4.24494586160536	0.00315356672906472	0.00691666468657221	0.00137239167907442	0.0348982351244489	3.94134472548043	1.72122934861152
2008226	4	6.94439009584964	0.155076108470271	0.420548245767665	0.0604096137792529	0.197997608319376	0.199907819471488	5.34675857794353	0.542519013423437	4.16015371850694	6.91568405155978	0.466771076906009	0.104205997930629	3.91831601564342	0.231622797689996	0.00793145196099701	0.000431042217804403	0.0865246495513933	4.65838870305436	1.39480827272337
2008226	5	6.28230216128399	0.173961443728236	0.464503088757718	0.0879830375122766	0.237934987928321	0.234105037681269	5.77991893086378	0.541489110884715	3.8931350299141	5.67290169558743	0.647189504735914	0.113239287810899	2.03124495892789	2.82571479043616	0.00784277006004093	0.000337710415420649	0.124278647972153	4.90753486759704	1.26388681134773
2008226	6	6.67715154314468	0.311503496743637	0.565505119248768	0.120923479964009	0.27683794279886	0.287322349943458	4.96839546844954	0.719932148659182	3.43088640864698	3.46395657140333	0.656251160108236	0.134217354210026	0.597773012207744	2.74340910818958	0.00760061846927173	0.00085282280882189	0.142010525269545	4.89733463439152	1.22906124349799
2008226	7	7.14189502757234	0.677008354329784	0.660950077258883	0.147627814823403	0.313296550142668	0.29137833360137	3.85236023421035	0.864505378199667	2.98569668995598	3.70279078804888	0.501520748427352	0.153236956316209	0.221783972809106	2.35508992844287	0.00702953762520073	0.0101830578141982	0.158496064295333	4.73079460204509	1.11311670028571
2008226	8	7.1086689478845	0.928723057092919	0.676588371430049	0.19680394826121	0.408092501243414	0.274916298195165	3.95120020694042	1.03188642633407	3.44294934990014	4.78099404703954	0.500374926439831	0.16820760255676	0.167013294596946	1.11507355008989	0.00771917782776258	0.0401264831215211	0.184724875356623	4.74751202660727	0.981867171390338
2008226	9	7.30507012241652	0.751212753694569	0.662664757926462	0.215453535067202	0.493323527346281	0.249609290818273	4.35139921239904	1.2055834455096	3.21992635105358	5.87870489948066	0.54264823906596	0.165589763313568	0.354086183441532	0.716616070252459	0.0143567531613862	0.0564705818506442	0.218711517335105	4.33488080486525	0.989438535588272
2008226	10	6.93180799370888	0.576211853917838	0.647118806487535	0.280311694292734	0.571225778155235	0.290073903300733	4.45530475491151	1.13761012115264	3.17546575376874	5.39834007115661	0.728073737296851	0.149563824659222	0.208988539710432	2.05418923836761	0.0257778413953376	0.0586225550473373	0.277197972827089	3.76644031784107	1.11481320307147
2008226	11	5.87746855316063	0.521427957844243	0.602223681171299	0.618130477557351	0.672005911355161	0.536496363449061	4.02373864309	1.01188297591492	3.68124348263929	3.90484154679925	0.839593449321105	0.149826962690693	0.475306187069909	2.12249127197943	0.0502910893679136	0.0789297956537617	0.309678947731569	3.76633253639319	1.12715457238863
2008226	12	5.37841981713372	0.556303487784312	0.607558932482653	0.820639631844525	0.724188189335228	0.653812286977455	3.25836060906953	0.932473541378728	3.78255481779546	3.19442104283291	0.917333187641256	0.184445608979912	0.927309145035495	0.701905188809787	0.0641167749572339	0.13154114563482	0.267389189313561	4.3344966128412	1.27613390285631
2008226	13	4.76137352954078	0.605703032066007	0.66821247203631	0.749752035696257	0.652512548101769	0.691494336897526	3.24431634563435	0.945091693449742	3.61411505983934	2.93080716807092	0.959490687488111	0.164127461608116	1.21847744710912	0.261848278617239	0.0451709040817719	0.162020643218067	0.214797882866785	4.31982903282745	3.81648933271238
2008226	14	4.50490214740872	0.571923953871991	0.721563723373874	0.588005558601849	0.573270497853815	0.612514089686187	3.14903801334983	0.935662380036174	3.4018954730666	3.33315407409248	0.957264278356546	0.112884552390737	1.47605202690524	0.094600924445722	0.026901590579861	0.162868850447868	0.187943669326676	3.87108805296446	2.80515642196319
2008226	15	4.82218901884991	0.548750595715426	0.659683533141956	0.487587368214877	0.599304827014903	0.613343814200395	3.03430416270066	0.859632431728613	2.91821799926421	3.46576511849201	0.878334239700795	0.067798558249248	1.66283358447133	0.181364770797581	0.0157038619875784	0.135094124850521	0.188480313550783	3.64846059669791	1.68885432904568
2008226	16	3.99489176306709	0.606947952880661	0.513597801328783	0.462635576326118	0.640663194916301	0.587003816208223	2.69073039954599	0.756620204380408	2.94850362211157	3.14189339295389	0.748316414477943	0.0510656479410998	1.27068467406313	0.297113378748973	0.0127848856355719	0.11966115489563	0.20991688286102	3.58815169015204	3.95392839992539
2008226	17	4.4393542174942	0.548930865122409	0.365666106538127	0.467257277917339	0.625285918984154	0.48672159671779	2.56015867063799	0.702058242769224	2.95147914032222	3.80787720962762	0.730725373865636	0.0536016386417383	2.28227064608074	0.459379848859433	0.011853264910061	0.111549956184283	0.374344594785012	3.58954716443065	5.03188010791961
2008226	18	5.509255092317	0.5019649977731	0.301878695573206	0.468887515904482	0.587977730422943	0.431160767572908	2.35747386437831	0.868870632439216	2.97975548110869	3.91971376098815	0.734614010735503	0.0192828897723331	3.19465896536078	0.692719189680317	0.018653925927994	0.104525480892981	0.645982204513349	3.38599654345596	4.52856339276187
2008226	19	5.32626177900482	0.604036178161144	0.138569350741776	0.409132411371695	0.590386232427109	0.407986328287199	2.11884145330525	1.68006792897654	3.25103269293534	2.86104318494939	0.628248727967675	0.00500845931062659	2.64278034970865	0.848110641327513	0.0273641958654522	0.103650449463204	0.668887284798767	3.26582330415207	4.56568184206611
2008226	20	4.0825233029174	0.717847233240506	0.136579385602411	0.383887352188425	0.885235813676602	0.338059729908136	2.0649932799823	1.87694588339507	2.70968398612627	2.44959208113953	0.491693487613198	0.0435153536813855	2.20052225548694	0.901260348949917	0.0303917416122325	0.10196261062181	0.61416157911201	3.29364552812538	4.51333097865869
2008226	21	5.1117938118943	0.673107250612385	0.1538283167772	0.435676896882303	1.1361379109468	0.24636632139447	2.10399753680331	2.31608664057089	3.09259932627673	2.25887954865642	0.478227401997443	0.179905131453639	1.50197600487233	0.866469966292025	0.0303994497038528	0.100571200167453	0.502148564255582	2.66565295662916	4.48509163268108
2008226	22	7.33539275353047	0.63738470062766	0.159430492972576	0.488005037988961	1.09166550215763	0.227548250771706	2.07221928862978	3.92541841628405	3.85146114409466	1.73721501611235	0.651678137301339	0.303538375788653	1.11297407462253	0.909884438028743	0.0264751338823482	0.0921064646113001	0.395291057258625	2.81747910632786	3.94319420386852
2008226	23	7.73877035594014	0.59211759962035	0.170495312390359	0.63611952199749	0.826340924278608	0.245617531827114	1.87427952122378	3.95725372814822	3.425874242777	1.35937357768603	0.896873080567651	0.399915866773552	0.414809117831437	1.08267717384372	0.0205122297907079	0.0876620376179108	0.281303779928784	2.88506962260106	2.60592332499116
2008227	0	6.63452254681353	0.629512267369765	0.278582584428133	0.685267463832161	0.889276461795264	0.24568010110926	1.78912267109403	3.53495361557782	3.23613918325764	1.37069349640526	0.942982089956852	0.45569759891198	0.946542648370128	1.01879559008552	0.018976659878681	0.0859280283448843	0.26313803211834	2.98953590020149	2.90021534104894
2008227	1	5.52940865075316	0.69281031366529	0.318661046615566	0.586407901702578	1.15630789557995	0.301969044846486	1.98289706368481	2.71404119674527	3.67235894129612	1.52125543011869	0.83390721719691	0.484424773026401	0.525298619781684	0.821736134612648	0.0238165682934545	0.0831353949647848	0.289090906798319	3.09123142052651	4.61230260088364
2008227	2	3.49448743566768	0.612152454991849	0.340950682078534	0.49787461646131	1.1578021616294	0.539504171305534	2.21700634710885	2.28398771858561	4.41855130507725	1.33745521594689	0.939488451404991	0.486411553403295	0.489990849023816	0.627770849287364	0.0409044640724961	0.0796207157158022	0.365693300702903	2.83100630027469	4.69203199643495
2008227	3	1.64812516923518	0.756143790529535	0.317557197522822	0.437464632032899	1.13842390793918	0.594439737227832	1.89118193559662	2.07486913736887	4.70190111481255	1.28012679656964	1.00350549568541	0.520872404768207	0.419031659381522	0.499740405106503	0.0555776289313798	0.0768774247295713	0.467258271983344	2.74154807824715	4.54712581647973
2008227	4	1.16707981910566	1.06465153944103	0.292952365551934	0.406227511786908	0.97521907982976	0.540135555342041	1.32091069585578	1.71916848082746	4.47686184455069	2.09787107883824	1.03093334228267	0.654721599848433	0.39624052992102	0.351854684259154	0.0635347652171635	0.0747921103172877	0.455251629674281	2.60888130352009	4.16771942720621
2008227	5	1.21545012528213	1.38422879895937	0.269117199908159	0.391977853328406	1.34911968624772	0.472877183955129	0.989653443740222	1.46366295985851	4.26312101012696	3.36670066915383	1.02946940870981	1.02955155341997	0.341890390344711	0.288464892654582	0.0700363183370347	0.0726833574130211	0.383980062588831	2.65341949323312	3.70644949838205
2008227	6	1.48333161002136	1.57568955284999	0.272449169193243	0.486912258325813	1.22577955374758	0.423651792313292	1.41270663948432	1.59617897728759	3.46423453520508	3.72744059624995	1.66834775525465	1.34805885167143	0.383435914497681	0.264985311007655	0.070747973183533	0.0747669268257904	0.313303261584686	2.61042102084341	3.28866656629742
2008227	7	1.71466551842224	1.50893313797289	0.544502742087264	0.653548198668265	0.981543721613069	0.418911603729727	2.65237472589039	1.80646515582438	2.13642350050963	4.23112007588356	1.76358878462943	1.21321684957608	0.512224251164049	0.422940458944936	0.134696249738144	0.222826214727397	0.395259216035855	2.59123828180436	2.91060595926177
2008227	8	1.95450989703493	1.23039285439952	0.794123998590164	0.794061196684634	0.896398594789991	0.432547937459218	3.09518178536566	2.10682714558863	1.62483912976817	4.6588215665526	1.58794019622938	0.87809674988188	0.244646298291033	0.467745765764334	0.135634027439905	0.265586777683935	0.559890302482383	3.10002516663318	2.70663681398372
2008227	9	2.05726829739206	1.47846939148222	0.598460183862414	0.968337611167169	0.941751309028918	0.430188652804092	3.47140370633892	1.78280623948938	2.83273209253578	4.82214419104041	1.4998718439674	0.729017334192464	0.141819581175492	0.474652265773566	0.134915038832694	0.297667422627606	0.814567059570568	3.37397402958241	2.46002042676021
2008227	10	2.06106678573622	1.67577982105611	0.511560159952645	1.2688900157519	0.922672252792228	0.415407955279737	3.71573736437201	1.66290657562279	3.80518337038334	4.75387996380101	1.7165124218562	0.66737310623718	0.149799088208309	0.348301847097499	0.139029567619685	0.317010721661362	1.08425000214958	3.38449192929399	2.26743839766378
2008227	11	1.93550763258147	1.43760285532271	0.414738479741955	1.30513453336842	1.00367223100304	0.352034785435723	3.7177343028293	1.74123691778823	4.13260022842596	4.63135523433056	2.49440510965834	0.595589524142318	0.204815312952278	0.265369608953103	0.135189479089737	0.298467720981264	1.21758182485157	3.47886158087884	2.11593791237422
2008227	12	1.74943261772663	1.10682835099846	0.351655715005588	1.19966231816308	1.17355741334849	0.289406506037111	3.62426474793818	1.85760106259914	4.35705309800275	4.46598693715755	2.57449924716794	0.497201947495057	0.218831115922976	0.223679351599675	0.12627698081376	0.266633968985261	1.15991073009547	3.74756602829869	2.08423649320686
2008227	13	1.56531338693071	0.929914475895866	0.305691376552757	1.04656854283325	1.31008396900854	0.240957387297706	3.54846350504965	2.03306452162986	4.38571344113639	4.23924810710956	2.22510103621814	0.429717505706153	0.265972227307186	0.193055572227119	0.11775549846873	0.240115408299375	1.07958371249561	4.15775197737618	1.96444517483761
2008227	14	1.35882904567691	1.02162876293499	0.281420830964342	0.876996734116116	1.35180736877105	0.204554831986997	3.20177881708678	2.22577767253486	4.18999315846493	3.7257463116223	2.07270998517149	0.385316905316888	0.345264189487603	0.167220329066813	0.110351007308539	0.219260648088768	1.06463239488914	4.4952704936897	1.62989196584164
2008227	15	1.15957857836637	0.939624971355706	0.268466013004854	0.695730440231735	1.37396165090094	0.179316501722608	2.85374156822742	2.46875181925503	3.81561355898731	3.69574585506224	1.92609958438635	0.368004571019756	0.346046957220663	0.166374290933045	0.10321435627225	0.203972223793629	1.10421787119816	4.49099334949099	0.890725431071588
2008227	16	0.966741068297795	0.73261434522533	0.245290911292266	0.562449602297056	1.38135126534946	0.162057696876209	2.60989395102027	2.68913835582817	3.48295588994833	3.70183931330841	1.57882733027728	0.462444068390498	0.338606477146484	0.163794638453331	0.0982789774581495	0.1878849002114	1.11167621134855	4.32083337665345	0.641939972814138
2008227	17	0.79509785814291	0.528157034559144	0.207110260486343	0.526004694478378	1.32083438719234	0.158786258710975	2.59344568320614	2.81003346277483	3.21251811611009	3.56565117845992	1.44323824943461	0.636261891028815	0.371338063033792	0.141793529842821	0.0936716442172926	0.169738482889955	1.03857650547138	4.10848283500482	0.598704263986309
2008227	18	0.786397759094983	0.370209790643528	0.143255058357393	0.484745234762642	1.20002051522025	0.168807190703154	2.46835160041805	2.809313827117	2.97798928836571	3.43696567247724	1.38930744399667	0.712945017342658	0.361192173074066	0.109997090300043	0.0847135543363921	0.151008937481227	0.928355644245346	3.93285160844973	0.582760640791059
2008227	19	0.796515629162716	0.269282459565228	0.118227942917796	0.435238531326011	1.05467283145999	0.177025390763795	2.20913399037642	2.72542225655349	2.73369219682451	3.2388121658379	1.13980801481258	0.696698738467808	0.305618126564018	0.0403653894612788	0.0767982059365978	0.137089442446094	0.841512085791616	3.80314461008324	0.427959349137086
2008227	20	0.836627371618954	0.135903501299854	0.120404446046388	0.363489928179482	0.835730718576829	0.159660273758332	1.90960152409679	2.55552751185316	2.6143137012547	2.96076848426038	1.06413592567616	0.683813319042824	0.272207097843884	0.0193433560580959	0.0714339736713533	0.133404426036373	0.763019926102442	3.81822823491365	0.271025080398922
2008227	21	0.8664474263025	0.123801321783061	0.13407432025552	0.239215637388547	0.646337220538257	0.152006774316206	1.72804766974238	2.40000875295719	2.64772078551585	2.82084309192248	0.827234372059064	0.756718957829763	0.253253028479936	0.0229663836365105	0.0682400787579029	0.127270355382608	0.686517278462659	3.8129519949984	0.230042809463893
2008227	22	0.824853391078038	0.115335684631862	0.153083710131332	0.165454632379146	0.56849544533215	0.145933556716421	1.49978771421601	2.2378015024408	2.95745110860835	2.73216078414953	0.620020437367686	0.89320363187587	0.228108233186351	0.0501815906880664	0.0652891696448103	0.121725913836905	0.611826238398944	3.74607798288542	0.184655264422299
2008227	23	0.714070064855435	0.101718716143041	0.172853892560289	0.14645769009962	0.571962798605562	0.142752681600192	1.28041760632424	2.0339870355646	3.02548093479455	2.83418610354339	0.523997627360224	0.932268413417092	0.235133966056564	0.0284174795768266	0.0779777974068348	0.122884795449637	0.542047631836848	3.62800665987478	0.137150411326415
2008228	0	0.696032549594208	0.0963393665530268	0.196667235169662	0.135952313592833	0.638696924707348	0.13611998506968	1.23728740816469	1.86762777689755	2.9245268346719	2.90165084183728	0.500115827760159	0.912655289196573	0.322318715288345	0.0073594352546205	0.0881075399565599	0.12624210434993	0.490220726505507	3.49086299223174	0.107021587468504
2008228	1	0.72745923688013	0.0922117991323178	0.210750640595996	0.131551333409094	0.626193945356442	0.129914991696573	1.3413113164413	1.70546895110849	2.8199484305179	2.82551979742269	0.604709501275346	0.943944366979212	0.426164886700587	0.00683045609806051	0.098567696307447	0.124208721051792	0.483878980045302	3.30491769853473	0.093102825464306
2008228	2	0.781218185809923	0.0863452454401248	0.208988532657172	0.130623735635119	0.585154758213671	0.124741814326304	1.5156992780961	1.51214255393594	2.75134242870411	2.65460110359985	0.785069824751301	1.19775944721103	0.370009032772193	0.0059420933185484	0.110386675233594	0.111992794795313	0.501505052049237	3.18188037666976	0.0892328173210196
2008228	3	0.801894369590454	0.0818584369472144	0.199884279746465	0.130732121878961	0.575256259609378	0.118715955127033	1.61802661660327	1.34328149480025	2.69034745330256	2.59465529341774	0.897928936215562	1.36488653661199	0.362057213415267	0.00602175691337306	0.108342748835975	0.107855960925983	0.496354364059637	3.0887265858571	0.095503075353246
2008228	4	0.659052933023516	0.0784521291360528	0.192254425029409	0.12964243338946	0.574261938709924	0.114049298907337	1.70511187641988	1.24868182793469	2.80783523325054	2.61116343767321	0.943355346506473	1.36228509668197	0.351518826599312	0.00532847556374168	0.114545408879626	0.110263090784451	0.433894213500046	2.87484794803119	0.115059149827419
2008228	5	0.455737488617187	0.0747496857121395	0.220008045272275	0.126820653722246	0.612587350132654	0.131473367740658	1.82491848141207	1.12643924091394	2.8857541763617	2.57806985000241	0.976649849414722	1.10418719734519	0.425697416981781	0.00718189808162281	0.113933682036481	0.111757871569791	0.376839742041248	2.57256954433767	0.14432722026739
2008228	6	0.348800310932729	0.074525486407408	0.288012390788157	0.127139925779446	0.680345626280092	0.162622626415078	1.89693236406491	1.04405300291202	2.80288903806941	2.33153908138454	1.00258573912584	0.897137759126633	0.390094603953894	0.01533612823246	0.113619580492395	0.115207951943067	0.37222965517568	2.29865424975335	0.176843169190992
2008228	7	0.327854448036436	0.084217234866251	0.254949122297911	0.130288962435701	0.728158735869858	0.160760654595159	2.28179698472849	1.01771511741835	2.45667254307323	2.06601631639836	1.01567069011001	0.915166721421361	0.337866664304983	0.0343983992549515	0.111967898153513	0.120039485296134	0.380107032698045	2.02734005519758	0.656989789239578
2008228	8	0.333906078058213	0.149637984272211	0.170553264448464	0.226216804887152	0.750342934959469	0.205455080792761	2.27443994597463	0.97437293519795	2.1985168857401	1.83331028454215	0.995968766106181	1.02950674959002	0.294354907632535	0.0597856612896423	0.106833566618183	0.11996627672521	0.386736423303228	1.84897930658572	0.884788906346691
2008228	9	0.377872720955438	0.232957479948123	0.122581651661773	0.310511655760832	0.76292172975226	0.252790915636523	1.61161131712629	0.913131924997861	2.03467388296187	1.59315384372441	0.969353007029429	1.07730928748132	0.272854669122412	0.0625363603083879	0.0915232080052223	0.115021334455764	0.392425071626978	1.73863169775207	0.806745063431121
2008228	10	0.436968463600328	0.332416587892018	0.110727702446953	0.375595082754612	0.758571507273199	0.262599436037709	1.16197469892104	0.834878058370512	1.93920904828301	1.4437423481312	0.995204094032147	1.10970555988372	0.220620218016285	0.0569241407356997	0.0734317315075444	0.10493452144429	0.396372689311543	1.66165952708578	0.582077833831522
2008228	11	0.505719125918707	0.358705089956284	0.115416626431005	0.360811559347743	0.746760828051899	0.255498147625188	0.914659902181551	0.763996920596996	1.90643392972495	1.35156639813198	1.03394745033845	1.19382592627313	0.177836666558712	0.0504759785884893	0.0547619296963419	0.1006497558593	0.389749480480294	1.58157210509303	0.449172406114873
2008228	12	0.643794812217162	0.349127561333618	0.112041329680463	0.324587616632165	0.747141800453934	0.230108518701094	0.753745097866286	0.730722341067909	1.88788942555245	1.27878464243421	1.10013751144349	1.26307583699316	0.103216997850726	0.044972552434864	0.0383484433967995	0.103705813949934	0.379262783296445	1.52639063952962	0.311902079147348
2008228	13	0.995415168687819	0.331594502746648	0.0904540285479777	0.290255259568611	0.739101001324103	0.196025547424937	0.638250223218766	0.725006432197466	1.81656317999078	1.26188053528359	1.11206639100797	1.25953172411066	0.0763541467779597	0.0413890983404833	0.0239546530346223	0.0945702980917088	0.362050259568509	1.53815288832619	0.236529311947238
2008228	14	1.47948922715745	0.306481293312204	0.0811163789698774	0.259844900826506	0.732462301641506	0.141049438875054	0.577650182111688	0.742674669164021	1.71858878685412	1.29561166912287	0.994332005023097	1.17909878382954	0.0871338421750022	0.0403493840078217	0.0191754988874355	0.081870163978243	0.338575925314331	1.52452752156731	0.186888444264697
2008228	15	1.86764843257192	0.281930394281901	0.0761779157839164	0.237179871968137	0.714529272138891	0.0709672492320497	0.53622908514221	0.792381956560484	1.6665953966051	1.41831157952047	0.817482271122934	1.11912971317661	0.113862896407363	0.0364783787724783	0.0187025104531362	0.065086637144221	0.317990030592344	1.45560527456399	0.16598305692771
2008228	16	2.08976007338292	0.259557027641146	0.069605735366031	0.226109414030499	0.68645745023887	0.0226913045538434	0.503710521928127	0.845255002221355	1.6175593578184	1.55556993960354	0.747652627881745	1.00080224177614	0.133182331887913	0.0355443720776927	0.0195325461205621	0.0534850441356412	0.308342114898083	1.37488984237838	0.162309231376447
2008228	17	2.18147392437719	0.255049301825702	0.0635005290549585	0.218117106652131	0.658436301206707	0.0212854802648352	0.501126413386095	0.841716116673133	1.5768291275857	1.67195432203408	0.712355880662319	0.87941984154786	0.128011654615284	0.0354798485103907	0.0196949425380597	0.0498326567077292	0.309483975927638	1.32807037321151	0.169548335070508
2008228	18	2.17136466535969	0.201687255504714	0.0529571238192505	0.182500941342296	0.615937238706944	0.021308936296206	0.540981988545582	0.750114350757881	1.49697665219258	1.69757812828267	0.706464573710946	0.766683172056534	0.124110142321205	0.0353377048857812	0.0173517856718945	0.0522863705003115	0.312745996498548	1.30450883073488	0.153967262103103
2008228	19	2.10926600119592	0.147361736756102	0.0472376796230914	0.180415393562799	0.571689779515961	0.0256526551216177	0.628248961166549	0.651648096011017	1.34595022977996	1.60065383313204	0.740511217197617	0.661034720194711	0.104512628287184	0.0350589029543706	0.0126338925337945	0.0418249527790931	0.339400651044061	1.29503726233695	0.0820948854441837
2008228	20	2.05454993340377	0.135480489993563	0.0428912685950984	0.178148609043033	0.56682459449435	0.0386160970699747	0.739428412064092	0.636595325153764	1.18007887637081	2.10160839590868	0.729994902539977	0.639421632953466	0.083721143260062	0.0347535576098053	0.00871771233848316	0.0250332572669346	0.356852069398722	1.271869174724	0.100159347809372
2008228	21	2.02176949590971	0.126371621872419	0.0394173018639713	0.171630705860922	0.596980802124314	0.0500690281719754	0.900954407941446	0.760593595227579	1.03853652822748	3.31336182618807	0.711238610410185	0.546214530527548	0.0774698860958022	0.0344961336969423	0.00591416877303192	0.018916187326798	0.328469573151581	1.23662353963362	0.134673571917994
2008228	22	1.99571721111422	0.122877051763828	0.0354651869497012	0.169733056002372	0.680822874997175	0.0591365552802768	1.07909296780682	0.722255408447352	0.956393188772408	4.83291161858128	0.678275610122334	0.532403780165938	0.0621335812371306	0.0342393163783444	0.00503489978166195	0.0162551335305277	0.289251099340114	1.22132074500339	0.157631172506906
2008228	23	1.98554500979402	0.108891218066313	0.035503175943085	0.180569765995173	0.811246121004748	0.0581377078742405	1.29103469553255	0.718201717199267	0.908388885189442	6.14346491230288	0.623048350146365	0.510648018193275	0.0469779811860868	0.0341156267854315	0.00517141707370352	0.0124705197085828	0.273816505270799	1.21843436069386	0.150502762370119
2008229	0	1.97194219124529	0.0974230656967372	0.0397065252421518	0.189023694421376	0.964018457862447	0.0565737392330584	1.45620914931546	0.758974467891416	0.877665278841271	7.09265493090172	0.651009424510953	0.463470994246562	0.0426338503364809	0.0337759507525385	0.0059651149013131	0.00821415241113143	0.114555572083118	1.23341110613067	0.131452290145779
2008229	1	1.86852762735329	0.0908805295107988	0.0445878593508825	0.182222409398911	1.11041881206464	0.0580876271740779	1.64343796360652	0.819027427863631	0.851814268643264	7.48741385203727	0.644577838488603	0.533485734535116	0.0414427644211483	0.0323845953965775	0.00697391589551772	0.00529444559255849	0.055373055097864	1.27361321500469	0.113670503884071
2008229	2	1.70346381565144	0.0862242783203876	0.0449455059006301	0.173614299833868	1.20867527274287	0.0623526081104555	1.88124361274012	0.870922384726851	0.837479064931605	7.49092104669067	0.641748441565616	0.511903270815961	0.0423457796580566	0.0292547454235748	0.00791482492841054	0.00437256607564089	0.0532216474866716	1.32453868625152	0.0998818296871549
2008229	3	1.57408671163604	0.0831353700037141	0.0426271375760426	0.167996792272853	1.09156873930334	0.0692229722679344	2.17593145126908	0.889846004358482	0.830296679259319	7.38827453833855	0.631217946864972	0.455691690331643	0.0434146101517936	0.0234318352998427	0.00793602941992533	0.00422483113786162	0.0993064726093518	1.385553424143	0.088764742528556
2008229	4	1.49789977912004	0.0818732532013511	0.0398848015302247	0.168889724366777	0.883456083656821	0.0743987279498078	2.41757392914715	0.881449084040126	0.831635065040901	7.31854076921474	0.59292887049679	0.353897337032953	0.0442765323484752	0.0183378461747296	0.00792207781879116	0.00669443880372587	0.120043263462677	1.45256383866525	0.0793779910230225
2008229	5	1.45356396777563	0.0816970047494424	0.0373010008031231	0.215344347132407	0.782326108200545	0.077592600087974	2.57355549620866	0.862775239704563	0.863696737076008	7.29800350971563	0.551565791670004	0.216264736484843	0.0456330537972618	0.0162840170072063	0.0090727957459413	0.0145555025248745	0.206461864200099	1.52105338039509	0.0711924663467324
2008229	6	1.48010770890268	0.167893855452401	0.0342608687975009	0.398293058758785	0.731773985363966	0.150148788642427	2.55186539687591	0.831082900484502	0.915249148328676	7.19204997953416	0.524752974931934	0.116124472890303	0.0470948889578406	0.0155803802196913	0.0116698341754774	0.0207553416033478	0.514745005835548	1.59582334564893	0.0639083016251821
2008229	7	1.5474613263765	0.227465940417709	0.0489655132058847	0.519026852642692	0.631050224911832	0.183678380431121	1.84997042408881	0.789366368361317	0.97912304416547	4.05322575483384	0.567475441743166	0.0990152383622853	0.0564736185006546	0.0144262146117863	0.0151060515598664	0.0209706523451106	0.711915260839326	1.65542925592457	0.115379440161435
[truncated: 352 more rows]
