# Supplementary material for: A comparison of sea salt emission parameterizations in northwestern Europe using a chemistry transport model setup
Source: Copernicus journal article supplement (doi:10.5194/acp-16-9905-2016), 2016-08-08
Supplement: Supplementary file 2 [file acp-16-9905-2016-supplement.zip › conc/conc.timeseries.values.sum2008.ov14.Na.DE0001R.csv]

doy	hour	pm2.5	pm10
2008183	0	0.167121010261527	1.55827878154557
2008183	1	0.164486986348416	1.43703165567078
2008183	2	0.161138779391556	1.32375657400223
2008183	3	0.155328722049042	1.21703455297439
2008183	4	0.148253001238704	1.10892050080257
2008183	5	0.136282335055105	0.981662470507908
2008183	6	0.119815786962326	0.838032663254247
2008183	7	0.10756482476159	0.736315733778785
2008183	8	0.102013331307739	0.681403643583977
2008183	9	0.0992534866469849	0.645076461635345
2008183	10	0.097413973460358	0.621825524511926
2008183	11	0.0963862510410094	0.608014752842186
2008183	12	0.096099158481291	0.609357880127009
2008183	13	0.0995525871070178	0.610449708612606
2008183	14	0.10167133511657	0.585484934403133
2008183	15	0.0928028268110551	0.529578028352768
2008183	16	0.0894838771795075	0.533732332643833
2008183	17	0.0933442762390708	0.582786022822
2008183	18	0.0941841635940945	0.576878072418919
2008183	19	0.0929392206930866	0.49855998900407
2008183	20	0.0812931448288465	0.366297685511303
2008183	21	0.0780636015620199	0.327473222195793
2008183	22	0.0832431584443374	0.357879320695289
2008183	23	0.087750472015903	0.378539141753012
2008184	0	0.0811197185701083	0.310332848010629
2008184	1	0.0703556655522265	0.227050627128059
2008184	2	0.0634393627125737	0.173665299056842
2008184	3	0.0485684448149724	0.115758280067452
2008184	4	0.03586450516772	0.0766013492656029
2008184	5	0.0291221258995719	0.0587425639132423
2008184	6	0.0234632796568843	0.04453029149987
2008184	7	0.0213435891468861	0.0386244589012784
2008184	8	0.0219487905893528	0.0370719540575436
2008184	9	0.0226599882811935	0.0369065861426822
2008184	10	0.0204242942216441	0.0318327222720116
2008184	11	0.0172314781506009	0.0266470674032243
2008184	12	0.0158424773494419	0.02370004224101
2008184	13	0.0151188762213224	0.0216707020583154
2008184	14	0.0148235107098177	0.020828254254344
2008184	15	0.0149819517437141	0.0208269610212582
2008184	16	0.0187424995984231	0.0260986176684777
2008184	17	0.0243411927806399	0.0358839974267155
2008184	18	0.0326743759758807	0.0534310012988285
2008184	19	0.040464713045045	0.0723335366466971
2008184	20	0.0479130913264546	0.093493663273528
2008184	21	0.0506011411975794	0.102803570191866
2008184	22	0.0589010032919201	0.107897503113887
2008184	23	0.0588786847164437	0.108882603660041
2008185	0	0.0530699706670776	0.099834425136484
2008185	1	0.050660403849755	0.087857034452614
2008185	2	0.0494703292546626	0.0804249770505937
2008185	3	0.0454012730132493	0.06792271361826
2008185	4	0.0404360359457802	0.0563845441415576
2008185	5	0.0352654690736513	0.0475394914685621
2008185	6	0.0335716919734918	0.048271418020879
2008185	7	0.0383486577373715	0.0614068105363777
2008185	8	0.038324048462358	0.0661822914903331
2008185	9	0.0382538425608169	0.0720559890123099
2008185	10	0.042671580500749	0.0911021656461266
2008185	11	0.0483420248532412	0.106614043918282
2008185	12	0.0550727606572621	0.126066231485583
2008185	13	0.0622423422214173	0.144556840070655
2008185	14	0.0716741516073979	0.169458993236662
2008185	15	0.0689840816518825	0.153316442856863
2008185	16	0.052040783009462	0.121379151897171
2008185	17	0.0569414332749709	0.153596324345896
2008185	18	0.0660867758585373	0.190652741250312
2008185	19	0.075610240007209	0.251247774173097
2008185	20	0.0818387297801082	0.304393851260065
2008185	21	0.073443754891491	0.272244301174726
2008185	22	0.06992830133168	0.246778057207866
2008185	23	0.0811727219234227	0.293116800681559
2008186	0	0.10567995913294	0.401807658457408
2008186	1	0.123794135847842	0.47601109925394
2008186	2	0.133219567140312	0.496677996678192
2008186	3	0.131121911500129	0.490536919785208
2008186	4	0.120355641905365	0.46581634004711
2008186	5	0.105427066692306	0.423175854893763
2008186	6	0.0964688385473452	0.361439411999097
2008186	7	0.0916511579427827	0.310040002592958
2008186	8	0.0871528406237035	0.272090835591861
2008186	9	0.0799580421884743	0.239626329622558
2008186	10	0.0737173940498218	0.213545829565262
2008186	11	0.067145564720189	0.190902928227379
2008186	12	0.0598609256442564	0.16813996180537
2008186	13	0.0497039062904948	0.138127409886196
2008186	14	0.0377280234308995	0.100884906322857
2008186	15	0.0270963265238351	0.0701495754241291
2008186	16	0.019424182433332	0.0505137852095345
2008186	17	0.01187817471361	0.0314595416888413
2008186	18	0.00535004993838422	0.0133679241577486
2008186	19	0.00289789844754497	0.00506874855820861
2008186	20	0.00280706803890641	0.0043283525112011
2008186	21	0.00338554496019808	0.0059860659798795
2008186	22	0.00326324590435588	0.00524127202332811
2008186	23	0.00324473312232469	0.00526427165579194
2008187	0	0.00340498299505592	0.00572332024780288
2008187	1	0.0035488929953828	0.00619828807943968
2008187	2	0.0036926903617534	0.00700585760538864
2008187	3	0.0033191465840783	0.00588204936902104
2008187	4	0.00306922485832774	0.00510229268040849
2008187	5	0.00308559810881923	0.00546753568534173
2008187	6	0.0029954444055856	0.00558003732133039
2008187	7	0.00244040101476595	0.00380803087708507
2008187	8	0.00217006811041336	0.00297459471270975
2008187	9	0.00206179060046973	0.0027560976418098
2008187	10	0.00205608137762039	0.00284196969486188
2008187	11	0.00215061039224501	0.00327679461756759
2008187	12	0.00250244414687685	0.00481757866471313
2008187	13	0.00291743107065024	0.00664798621670359
2008187	14	0.00301599737135775	0.00728856633788042
2008187	15	0.00278179093255007	0.00637421225279644
2008187	16	0.0023285476953282	0.00443957819156395
2008187	17	0.00197622022465528	0.00323610429901597
2008187	18	0.00173246808784286	0.00256959010666999
2008187	19	0.00159176030854457	0.00220114523666516
2008187	20	0.00146650919458835	0.00190919251188901
2008187	21	0.00136483604789746	0.0017148064710395
2008187	22	0.00129830537298873	0.00161635005628792
2008187	23	0.00125509537507508	0.00158025640017039
2008188	0	0.00123856864152756	0.00158880304645201
2008188	1	0.00125887879168627	0.00167705870516538
2008188	2	0.00139422969634501	0.00215233867137338
2008188	3	0.00175895287400416	0.00339238986559234
2008188	4	0.00247923959861116	0.00555504279513642
2008188	5	0.00463176130455021	0.0142024519600511
2008188	6	0.0138342725804624	0.0483536452526351
2008188	7	0.0238441920483627	0.0805024747382427
2008188	8	0.0307563599197942	0.113383931854213
2008188	9	0.0576496207690949	0.20459402793741
2008188	10	0.111595306332703	0.386952221272816
2008188	11	0.170659921529574	0.59855647747403
2008188	12	0.214499425556895	0.707149021206625
2008188	13	0.227646437433098	0.702791584952653
2008188	14	0.23335645622438	0.671295018075275
2008188	15	0.205683553795637	0.60208606038931
2008188	16	0.15412834758472	0.433834479300559
2008188	17	0.0953354506343216	0.241628849679728
2008188	18	0.0825826269276802	0.196379269350113
2008188	19	0.0893922228852735	0.20049666267127
2008188	20	0.0975663857733995	0.210452925233052
2008188	21	0.105643044214603	0.220916227378079
2008188	22	0.137297550561513	0.267061090554003
2008188	23	0.169776258845024	0.342520459811912
2008189	0	0.187672939451166	0.377832432571283
2008189	1	0.187481821140309	0.387015755268238
2008189	2	0.19090605623431	0.395867378786677
2008189	3	0.186080699710439	0.412632862733663
2008189	4	0.185251722240774	0.445851535037668
2008189	5	0.150618391053689	0.456754587549962
2008189	6	0.0955279479415544	0.284325862250518
2008189	7	0.0907501758863116	0.293514890675804
2008189	8	0.11003900975929	0.383595395284231
2008189	9	0.136750953609825	0.469864561721441
2008189	10	0.154578016150984	0.503448275556401
2008189	11	0.117283850294148	0.402247548165304
2008189	12	0.115867713834008	0.364881509097631
2008189	13	0.160667279818891	0.414479762518312
2008189	14	0.196991037708781	0.458991806016923
2008189	15	0.20913718240939	0.520682307866801
2008189	16	0.209100434780546	0.549337136623374
2008189	17	0.202143622379	0.530295436962081
2008189	18	0.147633982405801	0.446173904167044
2008189	19	0.0929874244035947	0.36731929137687
2008189	20	0.0666228639662736	0.39021194187066
2008189	21	0.0697767184563261	0.449880284591038
2008189	22	0.0728552642436573	0.432061778204408
2008189	23	0.105151993086483	0.590176251696468
2008190	0	0.101292408210892	0.625436062988652
2008190	1	0.0650720853218817	0.501568210771763
2008190	2	0.0527597727983369	0.408032158683019
2008190	3	0.0748684006463714	0.590207965760471
2008190	4	0.0977911948295159	0.691929471234624
2008190	5	0.109797731546327	0.694821789805342
2008190	6	0.141624024866494	0.806418262059146
2008190	7	0.20420883489003	0.959251703829169
2008190	8	0.309524700805047	1.40256016110807
2008190	9	0.34908228270708	1.61133595349691
2008190	10	0.371476566114569	1.6522678642525
2008190	11	0.338166207158169	1.49674350007626
2008190	12	0.284894090786995	1.23528161228398
2008190	13	0.281955614524451	1.26623234772365
2008190	14	0.275779575310304	1.41446727099603
2008190	15	0.306647950900547	1.47622296556576
2008190	16	0.315380997213255	1.44099479198304
2008190	17	0.251015503708337	1.1635748989145
2008190	18	0.254175540553387	1.1552897058247
2008190	19	0.275621949163421	1.29544707129297
2008190	20	0.246652546314876	1.27884968108075
2008190	21	0.180445832597465	1.01158910730835
2008190	22	0.148468455066276	0.811188024256174
2008190	23	0.160551814043485	0.821068438922406
2008191	0	0.191822716381546	0.899828272013514
2008191	1	0.203771408474061	0.897931441540809
2008191	2	0.171018100697823	0.766985861304947
2008191	3	0.108259819104032	0.495719231511653
2008191	4	0.100811848265153	0.45473135291536
2008191	5	0.138847617887773	0.622576860619125
2008191	6	0.156065486959028	0.697880147803107
2008191	7	0.140095738745146	0.63249182532315
2008191	8	0.11871281669699	0.538927937750597
2008191	9	0.110488163496041	0.486631989387293
2008191	10	0.115487890380504	0.484194110789977
2008191	11	0.115289307415774	0.461728818271484
2008191	12	0.113254828158499	0.429873107743493
2008191	13	0.103784727718296	0.384474700469786
2008191	14	0.0997129927155061	0.377224826889486
2008191	15	0.105370214946853	0.428272932592986
2008191	16	0.118964061488504	0.550327513931768
2008191	17	0.156010585519708	0.7741704255098
2008191	18	0.190085649750066	0.951607889082161
2008191	19	0.204054816984063	0.993592724192733
2008191	20	0.206549824412717	0.973618817474836
2008191	21	0.200486764299149	0.903855478116451
2008191	22	0.187190075389422	0.795702734426397
2008191	23	0.157903255430255	0.661298781782345
2008192	0	0.122729904851642	0.52414515678178
2008192	1	0.0955459027694449	0.401845771091784
2008192	2	0.092798048201353	0.367457801043907
2008192	3	0.129466607282883	0.591718642992348
2008192	4	0.0791250267191498	0.611227641521102
2008192	5	0.00885159360098314	0.0618733029008244
2008192	6	0.00774771687934832	0.07262989227657
2008192	7	0.0163529742662074	0.121533701807876
2008192	8	0.0810723152937533	0.614179300575511
2008192	9	0.115579764739731	0.89429281306503
2008192	10	0.103916477736394	0.821868576279834
2008192	11	0.105125426187819	0.836306233927608
2008192	12	0.10565774775483	0.873544096903127
2008192	13	0.0826283954039291	0.841419669472593
2008192	14	0.0809960339254997	0.794784994265178
2008192	15	0.0833638865763759	0.656353818834554
2008192	16	0.0753104982892781	0.479288654340152
2008192	17	0.0975035517613733	0.45226343182526
2008192	18	0.113213500439929	0.498912931098686
2008192	19	0.135110433263303	0.612152279887589
2008192	20	0.166257791445036	0.753006763512361
2008192	21	0.195049296990547	0.859027009157257
2008192	22	0.214738301495165	0.920698940836754
2008192	23	0.237209350128107	0.945489743630856
2008193	0	0.247787216713421	0.955707681977465
2008193	1	0.226951712451013	0.954272116902304
2008193	2	0.208647030679576	0.939076373565694
2008193	3	0.188503589988656	0.911556785022752
2008193	4	0.182880528532347	0.873734048419188
2008193	5	0.183278469037344	0.865485741989704
2008193	6	0.170503271029804	0.843450669768796
2008193	7	0.158344823372991	0.82021549561903
2008193	8	0.163651415667227	0.811559785651575
2008193	9	0.179862962863669	0.853183803175422
2008193	10	0.15976544299313	0.777505748693455
2008193	11	0.137658886401982	0.676809640569681
2008193	12	0.116312716876177	0.567973077514047
2008193	13	0.142519496956775	0.661725244640403
2008193	14	0.199348288380006	0.931457567198689
2008193	15	0.233941542066347	1.04977207409061
2008193	16	0.233609615704632	1.03793244565523
2008193	17	0.254162616208949	1.15310800080528
2008193	18	0.276836767266762	1.20392076795422
2008193	19	0.280757284447991	1.12071985567696
2008193	20	0.234594149812619	0.831740545804464
2008193	21	0.153025132585771	0.559505917189117
2008193	22	0.166501660350676	0.61469742326296
2008193	23	0.228785218531141	0.806579837631949
2008194	0	0.22414248789751	0.833335692808055
2008194	1	0.20607318619418	0.829458401449563
2008194	2	0.217799398894002	0.94563224579927
2008194	3	0.216079400142504	0.925175883206105
2008194	4	0.20073542928297	0.821232216988953
2008194	5	0.185032300112822	0.746363989904326
2008194	6	0.164026242316739	0.707819772969881
2008194	7	0.124952507155052	0.631658838620836
2008194	8	0.107746518646566	0.614152493231504
2008194	9	0.104982114106582	0.761427596913072
2008194	10	0.104066784045926	0.881436645796024
2008194	11	0.14747920742278	1.21817365148266
2008194	12	0.14025142744624	1.13782643726046
2008194	13	0.196113235837167	1.29077361251653
2008194	14	0.350628219053141	2.0574139784258
2008194	15	0.455053275529747	2.55564607227585
2008194	16	0.454579343941044	2.47941592337363
2008194	17	0.413454189289387	2.24289281381342
2008194	18	0.382019682372892	2.07939618659956
2008194	19	0.373633196050495	1.99449008863766
2008194	20	0.352665394962831	1.85820224406133
2008194	21	0.319850204446015	1.64892814656787
2008194	22	0.226320346295898	1.18226311493611
2008194	23	0.208099953819172	1.09963323198535
2008195	0	0.203553409456922	1.09761499572573
2008195	1	0.167461082430307	0.886795486148822
2008195	2	0.167443678080317	0.821900870914787
2008195	3	0.183824226298646	0.829885360580868
2008195	4	0.191429006472591	0.811712995476327
2008195	5	0.184550134007766	0.79725732394058
2008195	6	0.172811796132309	0.805511318798506
2008195	7	0.175129769677952	0.839699904963412
2008195	8	0.179648374959627	0.894154570166719
2008195	9	0.184679953164784	0.925865251238779
2008195	10	0.19514443188601	0.957519695313123
2008195	11	0.220647354001082	0.965424115330426
2008195	12	0.212781431931505	0.878822247026204
2008195	13	0.134099896287702	0.640955488977351
2008195	14	0.0487909038592344	0.262977837426659
2008195	15	0.0432653629116389	0.213336112047771
2008195	16	0.0893960463417234	0.412472196280556
2008195	17	0.104801843445189	0.452655661127889
2008195	18	0.114548961329045	0.445499524144943
2008195	19	0.107469600788644	0.408884877479154
2008195	20	0.104934341305862	0.389452789307999
2008195	21	0.106509422823192	0.406653401105247
2008195	22	0.111664349925041	0.438419768716255
2008195	23	0.11942288809463	0.457715788877614
2008196	0	0.117863272354241	0.439389375456883
2008196	1	0.105818465636014	0.377148943430787
2008196	2	0.0937788646137639	0.317440130136419
2008196	3	0.096490255095332	0.312639986175643
2008196	4	0.102749516371414	0.332583252052508
2008196	5	0.107582982970565	0.363417566920891
2008196	6	0.102078871951449	0.346844710434746
2008196	7	0.0986621105035508	0.294382527302456
2008196	8	0.0853528333343869	0.259865188865083
2008196	9	0.0911051089104257	0.247204766501493
2008196	10	0.0859902896353351	0.231412757604078
2008196	11	0.0592144811006431	0.184897067496581
2008196	12	0.0499236533230202	0.180158372245215
2008196	13	0.0588818422749456	0.226144834438068
2008196	14	0.0835242334453364	0.321671158581567
2008196	15	0.126579925447172	0.505640831445487
2008196	16	0.178000234361133	0.794033818422585
2008196	17	0.232363620282402	1.1686038885568
2008196	18	0.253606985379184	1.33192409877302
2008196	19	0.238045125933058	1.23009794400271
2008196	20	0.206057000230767	0.991067077151655
2008196	21	0.200269132328552	0.987614649520218
2008196	22	0.22209417105073	0.932316495035321
2008196	23	0.242574277658072	0.900997388058999
2008197	0	0.261673003546267	0.889708206200442
2008197	1	0.23254733137937	0.742892943682004
2008197	2	0.162821589947845	0.494514073409109
2008197	3	0.137033314798252	0.388441426245151
2008197	4	0.126161314706238	0.36251067638915
2008197	5	0.11612469497598	0.365459069797418
2008197	6	0.111854702940121	0.41210162669591
2008197	7	0.107918915584845	0.438516028956176
2008197	8	0.0922370966125656	0.419877235110184
2008197	9	0.0718929779041931	0.369095849884534
2008197	10	0.0662418112277551	0.392790243036918
2008197	11	0.0740803163957078	0.491728565092064
2008197	12	0.0875721912998311	0.622707020750265
2008197	13	0.0953943188496525	0.688584116880565
2008197	14	0.0903056021045643	0.707993176012268
2008197	15	0.102347756779277	0.684341380201673
2008197	16	0.104589126757462	0.679955524374344
2008197	17	0.0676750371820858	0.43871429508477
2008197	18	0.0611412128392871	0.405906942646881
2008197	19	0.0661621082940027	0.469840151533981
2008197	20	0.0575820915426022	0.433030694785022
2008197	21	0.0544034827079756	0.443341139432194
2008197	22	0.0456801293405686	0.468945249149284
2008197	23	0.025455468548312	0.263212580285697
2008198	0	0.0587653019793381	0.40238101516129
2008198	1	0.0966151473264776	0.570808016118251
2008198	2	0.115437644683256	0.651787115841596
2008198	3	0.157489648547242	0.795173839181942
2008198	4	0.225446282404478	1.05601750643544
2008198	5	0.263250057810324	1.21890433669104
2008198	6	0.273645287470532	1.23946391015107
2008198	7	0.29219722013605	1.27902569665012
2008198	8	0.344203127857445	1.49661709826176
2008198	9	0.388877208274288	1.70799592069068
2008198	10	0.409771716179855	1.79083612693171
2008198	11	0.433492594985261	1.88335411714167
2008198	12	0.447217077284438	1.95650182055404
2008198	13	0.400842584663001	1.83281057356963
2008198	14	0.278185855441339	1.32417409297114
2008198	15	0.171531710687862	0.860787048771657
2008198	16	0.143634474736864	0.78608075945062
2008198	17	0.148769847958634	0.746189243766917
2008198	18	0.210358018554605	0.959537579737292
2008198	19	0.300556858838183	1.31982175503783
2008198	20	0.318543632514793	1.35613625397867
2008198	21	0.304359093905954	1.28136315549074
2008198	22	0.276395094753057	1.15350963797501
2008198	23	0.246618731846423	1.0227909646713
2008199	0	0.248454016408673	0.983385906496075
2008199	1	0.294302720827388	1.09894577033811
2008199	2	0.328486081911506	1.22634709245444
2008199	3	0.337451859195123	1.24888257869311
2008199	4	0.341447110295775	1.2258712736948
2008199	5	0.329938901619733	1.16327091089443
2008199	6	0.336668683136395	1.05832910701377
2008199	7	0.328026666263156	0.910691881818282
2008199	8	0.303729509619074	0.820897192151762
2008199	9	0.304696306937138	0.771771208370129
2008199	10	0.296364485107566	0.707700346301362
2008199	11	0.28613852620762	0.647849880537512
2008199	12	0.27121282746061	0.616180938048621
2008199	13	0.263092683752678	0.6157762954355
2008199	14	0.256772923569733	0.587586261288343
2008199	15	0.183610293203059	0.477842624939054
2008199	16	0.0758389496951168	0.22457259504482
2008199	17	0.031430944405626	0.0891866189706272
2008199	18	0.0243740472993867	0.0767344261973874
2008199	19	0.0369990462055749	0.121673772465852
2008199	20	0.115921279843625	0.426248397012891
2008199	21	0.15390016894862	0.675614497812123
2008199	22	0.146877830449913	0.767802940554754
2008199	23	0.141869685504412	0.784815714507685
2008200	0	0.135067818267738	0.728542152183221
2008200	1	0.0948157049177139	0.616701761487779
2008200	2	0.0693069520603092	0.473253851253351
2008200	3	0.0768145733801414	0.542525068449885
2008200	4	0.0520109158798259	0.436897156340109
2008200	5	0.0396278332509191	0.334542682586286
2008200	6	0.0284679648008091	0.285008714777193
2008200	7	0.0252809052166042	0.242986790922596
2008200	8	0.0286359885231465	0.188406102540871
2008200	9	0.0269819989609831	0.120041563618761
2008200	10	0.0218652350594745	0.0839646217864841
2008200	11	0.0231471176953601	0.0780116503974479
2008200	12	0.0280363224832311	0.0826173307989286
2008200	13	0.0366211798117457	0.106553440111418
2008200	14	0.0469225887717358	0.135900480525674
2008200	15	0.0485132822675246	0.139568990715993
2008200	16	0.0497217038912688	0.136926823786247
2008200	17	0.0512239412797173	0.130772733118914
2008200	18	0.0496615223365031	0.121840741325886
2008200	19	0.0482440654541938	0.116362642469006
2008200	20	0.0468816027639931	0.113480211863349
2008200	21	0.0462055204123074	0.111809775239429
2008200	22	0.04549328472649	0.11083728872427
2008200	23	0.0442090644525095	0.110608920436243
2008201	0	0.0424257172143572	0.111694362362183
2008201	1	0.0414980140098508	0.111602036868786
2008201	2	0.0359673086913414	0.108697337470229
2008201	3	0.0270540332530816	0.0948232457597656
2008201	4	0.0192942882070104	0.0657410203232919
2008201	5	0.018828658848638	0.0726841387620326
2008201	6	0.0101277014397208	0.0522202842872463
2008201	7	0.0209544898791174	0.120845616779028
2008201	8	0.0442880899409292	0.269837686883327
2008201	9	0.0597486500738828	0.370798993911321
2008201	10	0.0716629224959823	0.4429538927836
2008201	11	0.0758853934815233	0.484992435474839
2008201	12	0.0552149684695653	0.432018938255808
2008201	13	0.0525188930718009	0.40637008249806
2008201	14	0.0597122380373601	0.488573572858719
2008201	15	0.0734397159814099	0.574312367416693
2008201	16	0.0960828043212744	0.692917043203352
2008201	17	0.123207779633162	0.782066894595178
2008201	18	0.127486913539615	0.843403382326904
2008201	19	0.128685429877502	0.809404898421581
2008201	20	0.127770694552851	0.735735800620667
2008201	21	0.12381189265515	0.719466828847625
2008201	22	0.126674400645709	0.741214905294058
2008201	23	0.138991708964604	0.780950014842785
2008202	0	0.12170976367321	0.79002945712657
2008202	1	0.0889765839901116	0.629325099680486
2008202	2	0.0620549147148598	0.47894425566545
2008202	3	0.0620151237254989	0.446848709365413
2008202	4	0.206379632223311	1.43616317602121
2008202	5	0.236094038856339	1.72667595850938
2008202	6	0.220650527137428	1.68983475280877
2008202	7	0.226364691291116	1.82372777874425
2008202	8	0.21327833528629	1.86348088192442
2008202	9	0.212995162006414	1.96001877544869
2008202	10	0.209520874764597	2.04059711767502
2008202	11	0.216529705237646	1.99448774148592
2008202	12	0.167568657806635	1.4330973017969
2008202	13	0.084352043915789	0.632672880050933
2008202	14	0.0591737868215169	0.366673460402124
2008202	15	0.106618627359659	0.613411075588976
2008202	16	0.161087451818689	0.939371973943872
2008202	17	0.229080982380508	1.43656810235039
2008202	18	0.332587322178357	2.28537908459307
2008202	19	0.392737996543739	2.70044363037191
2008202	20	0.401792025154523	2.55687135962943
2008202	21	0.346165950843097	2.13245569039952
2008202	22	0.225196040316246	1.48855203468463
2008202	23	0.128225956141259	0.817638204467519
2008203	0	0.0577100608520485	0.35163517201565
2008203	1	0.0473216732054814	0.274472208130566
2008203	2	0.0705228645960938	0.394942755280509
2008203	3	0.0975251956367448	0.534737012576772
2008203	4	0.0892781789746096	0.50686469580192
2008203	5	0.0588822687592649	0.348891344416898
2008203	6	0.0400648579234755	0.239150220036411
2008203	7	0.0362833768090295	0.230115045034106
2008203	8	0.026255908311194	0.170307239663925
2008203	9	0.0233285392297539	0.133359480758684
2008203	10	0.0240754883198576	0.125214340554363
2008203	11	0.0242811038141651	0.117278684238322
2008203	12	0.0251150134746423	0.115214149964077
2008203	13	0.0282866230612645	0.120063477141984
2008203	14	0.0314900219742379	0.126938995070672
2008203	15	0.0338323005462348	0.135794565905261
2008203	16	0.0352199785269766	0.145663237289779
2008203	17	0.0381295506377876	0.163432135568986
2008203	18	0.0424567397170203	0.193548088642125
2008203	19	0.0508568743998446	0.249234854986093
2008203	20	0.0610301500974278	0.329102851879578
2008203	21	0.0756034303843981	0.439505575683087
2008203	22	0.0960252558556786	0.574118129368587
2008203	23	0.107264359601928	0.668472909571651
2008204	0	0.142139405315004	0.849774660423418
2008204	1	0.189386056351292	1.11257571074741
2008204	2	0.289538858325887	1.69613331801037
2008204	3	0.457770698271974	2.62303019122285
2008204	4	0.513821250314099	2.77299008353234
2008204	5	0.547583973472087	2.79022106802051
2008204	6	0.574202338479598	2.71680253516319
2008204	7	0.570756996693134	2.58139679271802
2008204	8	0.548240789250623	2.49856518745809
2008204	9	0.499279407517863	2.32656326561118
2008204	10	0.449989445005597	2.16195046512513
2008204	11	0.415357403288381	2.06548615288945
2008204	12	0.374717523962405	1.94333722897096
2008204	13	0.320887919523563	1.72162217096836
2008204	14	0.288772083600176	1.44161869408472
2008204	15	0.256894067791503	1.23590501194385
2008204	16	0.233748190216274	1.11774022704991
2008204	17	0.280470417266249	1.33872958910808
2008204	18	0.322962759015009	1.50603162929948
2008204	19	0.320238360572054	1.43971998932791
2008204	20	0.27696822263043	1.17479454430699
2008204	21	0.196236921233174	0.752600104574108
2008204	22	0.174833436096872	0.64312000907171
2008204	23	0.170042917871134	0.631265521061938
2008205	0	0.17418325105478	0.640089045646715
2008205	1	0.155560882437894	0.564447672668676
2008205	2	0.144674104398737	0.528357245779295
2008205	3	0.167314851364577	0.565503492754869
2008205	4	0.313618773091672	0.984498766886569
2008205	5	0.643222482102749	2.2855498433346
2008205	6	0.806761509184468	2.79891670506408
2008205	7	0.849745159368657	2.77454337578975
2008205	8	0.828126443762973	2.68617368001036
2008205	9	0.775241449539999	2.41712474761737
2008205	10	0.718553577937594	2.19439763225797
2008205	11	0.68155575292586	2.04507348526171
2008205	12	0.663554009625799	1.93612663778576
2008205	13	0.651869419811851	1.88898603069558
2008205	14	0.630928964103629	1.85949665791599
2008205	15	0.609075238868549	1.81059030875561
2008205	16	0.604201145520273	1.75986791211128
2008205	17	0.593972092870052	1.73648210266133
2008205	18	0.578339223057905	1.72973328700332
2008205	19	0.562263548069514	1.73334915621251
2008205	20	0.559607182236585	1.73670228931615
2008205	21	0.55370122069517	1.74025462199561
2008205	22	0.551237541127673	1.74815555282182
2008205	23	0.551425813404447	1.75969419291913
2008206	0	0.549203901999453	1.76890667159911
2008206	1	0.535233978637861	1.76584739301064
2008206	2	0.524470851774235	1.7183380359106
2008206	3	0.501487207476985	1.59538048372132
2008206	4	0.472846177515575	1.50188442061145
2008206	5	0.445527618705991	1.3940777921202
2008206	6	0.426636981698802	1.30630692388798
2008206	7	0.402043164471063	1.22878320389258
2008206	8	0.384818172633696	1.12922137834585
2008206	9	0.372285710929873	1.05291657215133
2008206	10	0.366020172216098	0.984901105772579
2008206	11	0.35503838440022	0.908175792981873
2008206	12	0.332128766404444	0.817713078736676
2008206	13	0.30890856707726	0.738008589892225
2008206	14	0.289804771827336	0.653217355464646
2008206	15	0.248911192883048	0.534648869456826
2008206	16	0.181542757342995	0.33677548928487
2008206	17	0.0904462466656291	0.161632285986906
2008206	18	0.0369367554293097	0.0716190364517829
2008206	19	0.0156415117494527	0.0329204210613994
2008206	20	0.0201249223903751	0.043273421684109
2008206	21	0.0651769350319172	0.156411872708724
2008206	22	0.0897561200008626	0.220350608241774
2008206	23	0.111869901653834	0.272712139026848
2008207	0	0.139204952114947	0.357803480456194
2008207	1	0.142745171623502	0.391324797042994
2008207	2	0.131287982050086	0.37529662876647
2008207	3	0.131581948468467	0.370992964930003
2008207	4	0.134969696327521	0.375312742136187
2008207	5	0.149106175053428	0.406546384351795
2008207	6	0.174059656012518	0.460492731566588
2008207	7	0.21147194579155	0.526179769877692
2008207	8	0.255523694220131	0.597976212291157
2008207	9	0.281335476604487	0.649656712074964
2008207	10	0.275543166666209	0.607829386069721
2008207	11	0.239467930059837	0.529968398659288
2008207	12	0.192833769233799	0.43869540290138
2008207	13	0.165920377403638	0.36784037958787
2008207	14	0.147742107370602	0.337712680090231
2008207	15	0.131558351675864	0.323249814571683
2008207	16	0.128204571075575	0.342303662378448
2008207	17	0.119781976941235	0.331930657488623
2008207	18	0.11637598489257	0.331231375001772
2008207	19	0.129248685019793	0.375800698046517
2008207	20	0.138751800281874	0.420209861831966
2008207	21	0.14712423661027	0.472057210573913
2008207	22	0.159826618018948	0.505319190384875
2008207	23	0.172035604515715	0.540143069723548
2008208	0	0.182840259488446	0.565369576441396
2008208	1	0.188575185438906	0.573742567602225
2008208	2	0.187375107209023	0.581773590292707
2008208	3	0.187496148457416	0.585640100276788
2008208	4	0.179973879752662	0.574575487316298
2008208	5	0.172460071205518	0.559798401618059
2008208	6	0.180570476083226	0.528473515527509
2008208	7	0.176887455591269	0.471302630329135
2008208	8	0.171397018010076	0.420273358665471
2008208	9	0.164729995955899	0.362654665569126
2008208	10	0.138328886621805	0.287373632091121
2008208	11	0.129264516151177	0.259543878927296
2008208	12	0.123573470866194	0.245968695760673
2008208	13	0.111834638268188	0.224224604610821
2008208	14	0.102491845215381	0.209468244133726
2008208	15	0.0936106726421335	0.196733095982823
2008208	16	0.0846180359552714	0.189082433886563
2008208	17	0.0878622134276702	0.202413672806213
2008208	18	0.0894220989711497	0.219027369729132
2008208	19	0.0992393644675235	0.251389799237919
2008208	20	0.112339122680611	0.294444471981072
2008208	21	0.12233987228118	0.334255820765053
2008208	22	0.126346602825319	0.360266855942629
2008208	23	0.131955533400607	0.392658311548054
2008209	0	0.137549619833509	0.417344842881045
2008209	1	0.140182521687405	0.430610936148651
2008209	2	0.142716170047487	0.439922800616733
2008209	3	0.142741129272304	0.442398327072484
2008209	4	0.13478781209698	0.436818405952922
2008209	5	0.133093676064539	0.436286724915073
2008209	6	0.135441961732326	0.425925068646312
2008209	7	0.140159353445913	0.396206851996181
2008209	8	0.127983393232942	0.319686653689675
2008209	9	0.114831769810586	0.253205529956024
2008209	10	0.0952028755399029	0.191298551538777
2008209	11	0.0740182984793186	0.13910767423623
2008209	12	0.0607420281820278	0.107541341590857
2008209	13	0.0486210829952479	0.0860626171600537
2008209	14	0.0391757662567733	0.0717450952443737
2008209	15	0.0321751139163007	0.060368998222268
2008209	16	0.0280957927438847	0.0544883839900756
2008209	17	0.0248790342697481	0.0570499542302808
2008209	18	0.0322610665666096	0.078871763746352
2008209	19	0.0467304059804678	0.119445785382193
2008209	20	0.061372622269144	0.165462473003295
2008209	21	0.0689076496194135	0.191383383675778
2008209	22	0.064044928229831	0.175617505877155
2008209	23	0.0672280922888144	0.181877838547068
2008210	0	0.0684693521064529	0.189243059002609
2008210	1	0.0584847878534482	0.166248327265261
2008210	2	0.0436889421068162	0.120910519911836
2008210	3	0.0290063814234412	0.0766170214043553
2008210	4	0.0216242026287172	0.0548539149858848
2008210	5	0.0178854153394182	0.0435263801774646
2008210	6	0.0168755670739778	0.0391617345716401
2008210	7	0.0171440880602206	0.0380310184541544
2008210	8	0.0184124355055031	0.0383073981977707
2008210	9	0.0210695821509718	0.0406691015098373
2008210	10	0.0232428201381163	0.0426520195419384
2008210	11	0.0270087099826967	0.0495990737572756
2008210	12	0.0315142968798827	0.0557729179888085
2008210	13	0.0412229426089166	0.069241138503217
2008210	14	0.0528041879506686	0.0875347027509143
2008210	15	0.0659690289518945	0.112430910632125
2008210	16	0.0801249748434469	0.144715964599062
2008210	17	0.0926048827502714	0.183399184788248
2008210	18	0.100516729287155	0.228924285988518
2008210	19	0.108271656875327	0.287045245951409
2008210	20	0.117586346020345	0.35235813450227
2008210	21	0.114103971560945	0.373489292227939
2008210	22	0.0960193140694195	0.330964260839105
2008210	23	0.0785373396707284	0.259913135989038
2008211	0	0.0629728276352045	0.20374104719679
2008211	1	0.0501999518803878	0.16235139252207
2008211	2	0.0400776705173727	0.130843015695623
2008211	3	0.032157423364223	0.109930073420312
2008211	4	0.0292920219714249	0.106189014091796
2008211	5	0.0325087083364667	0.120377673773911
2008211	6	0.0408169893589516	0.138416676037153
2008211	7	0.0466798446637946	0.148312464285342
2008211	8	0.0474072615829944	0.147949696454906
2008211	9	0.0449600276000177	0.143540081065673
2008211	10	0.0427364880516017	0.144309700435461
2008211	11	0.0428009323296116	0.149570268074474
2008211	12	0.0435128048195578	0.162497306851539
2008211	13	0.0476909485259318	0.185886398660966
2008211	14	0.0502671684954236	0.201880882204585
2008211	15	0.050043449299844	0.208290082404839
2008211	16	0.0504945410369968	0.214263430092728
2008211	17	0.0558305455584472	0.234546406814194
2008211	18	0.0609003866189922	0.259081541814466
2008211	19	0.0640385160782164	0.279244756673495
2008211	20	0.0683309869667738	0.294706430397103
2008211	21	0.0672621398950865	0.280283142486032
2008211	22	0.0668011277246631	0.271244643003886
2008211	23	0.0625812042189858	0.250980692892999
2008212	0	0.0596153910139296	0.237290893639199
2008212	1	0.056844263535059	0.225011824076281
2008212	2	0.0549494844090976	0.210291607921916
2008212	3	0.0528262373034211	0.186839889989184
2008212	4	0.0472854457574961	0.162676319733934
2008212	5	0.0423261768114412	0.138067146829782
2008212	6	0.0382775891651561	0.1172256242484
2008212	7	0.0288516683942087	0.0885618647219174
2008212	8	0.022681437302211	0.0672546045814747
2008212	9	0.0178637600772446	0.0503673741398871
2008212	10	0.015161710702397	0.0400393122455319
2008212	11	0.0138724291691797	0.0370177055699452
2008212	12	0.0156373429729405	0.0430664655556811
2008212	13	0.0167547369756869	0.0449426311597293
2008212	14	0.0168185701673414	0.0432847107611959
2008212	15	0.0171389359153478	0.0424731344603343
2008212	16	0.0174791923425803	0.0422205879632111
2008212	17	0.0179307149419517	0.0430317932376135
2008212	18	0.0198778539930084	0.0472860506303406
2008212	19	0.0252910119926082	0.0635620761917928
2008212	20	0.0350983019331497	0.101300303055818
2008212	21	0.0464755147024785	0.1439845114748
2008212	22	0.0520994891422298	0.164646501494401
2008212	23	0.0543590372511377	0.17717455956652
2008213	0	0.0526572796358457	0.177656873126417
2008213	1	0.0485815585324774	0.164171151518955
2008213	2	0.0442233592814346	0.153532590709221
2008213	3	0.0400004730979431	0.14324540919548
2008213	4	0.0340595646048795	0.118306807807246
2008213	5	0.0296721533067157	0.100911964107855
2008213	6	0.0279143773535362	0.0912460536706822
2008213	7	0.0274000046218586	0.0848757725324453
2008213	8	0.0282190680067751	0.0843977161926545
2008213	9	0.0233889337544355	0.0718796119297103
2008213	10	0.0196556879186668	0.0632797657259995
2008213	11	0.018997843269576	0.0615758005268994
2008213	12	0.0181938848183389	0.0602277076774465
2008213	13	0.017722026632087	0.0615756058281804
2008213	14	0.0199860657609915	0.0727267572671158
2008213	15	0.0234827225644548	0.0884279285381081
2008213	16	0.0285145255701163	0.1098776520043
2008213	17	0.0354098265495738	0.138572547566944
2008213	18	0.0429043117555578	0.162190033169548
2008213	19	0.0519335397711019	0.190440732764081
2008213	20	0.0568583580783016	0.213836557896121
2008213	21	0.0601831644749079	0.237436178296355
2008213	22	0.0559742728118161	0.230995183422253
2008213	23	0.0502688413897969	0.218566064197674
2008214	0	0.0464783732857385	0.205861936227838
2008214	1	0.0411013840660333	0.181667792966913
2008214	2	0.0371388798862948	0.166175239968636
2008214	3	0.0335455223018327	0.14909911486296
2008214	4	0.0341796314616347	0.144588464448957
2008214	5	0.0324715297702185	0.125762008796795
2008214	6	0.0284397813151591	0.0997471307389513
2008214	7	0.023493411470501	0.0731828155025337
2008214	8	0.020132415570946	0.055079933895566
2008214	9	0.0180220629225222	0.0431689694151211
2008214	10	0.0122782485975623	0.0270492416569951
2008214	11	0.00875251897456622	0.018638427202198
2008214	12	0.010456981458841	0.0220491692255355
2008214	13	0.00748200558836524	0.0141039291641257
2008214	14	0.00442850826857038	0.00759882205497068
2008214	15	0.00292936301967804	0.00534981009749017
2008214	16	0.00219751463354196	0.00436591831241239
2008214	17	0.00179784235221684	0.00376531229673607
2008214	18	0.00178929370511805	0.0040316430735999
2008214	19	0.00364285587735633	0.0105803714220131
2008214	20	0.017974466508989	0.0874592984880536
2008214	21	0.0252838725239914	0.120689968471369
2008214	22	0.0283733682237144	0.118303614045265
2008214	23	0.0447619972082915	0.161201938657008
2008215	0	0.0893718577569695	0.299967058235407
2008215	1	0.121518023634095	0.423665806489345
2008215	2	0.126313794982172	0.448034091182686
2008215	3	0.124648387318856	0.440821054574302
2008215	4	0.110640609120693	0.405255080257713
2008215	5	0.0991989026903275	0.366185256917707
2008215	6	0.0888266070242843	0.354315737366096
2008215	7	0.0828873090213125	0.318309003113181
2008215	8	0.0785496912516088	0.271795423267229
2008215	9	0.0824779045932745	0.268130533471213
2008215	10	0.0666931120279014	0.237233398784849
2008215	11	0.0506378144174422	0.193466079779266
2008215	12	0.0880290327043963	0.291039782254413
2008215	13	0.105092882960762	0.380844037047701
2008215	14	0.123302891719338	0.523939194588399
2008215	15	0.14324102234011	0.67252713695931
2008215	16	0.156782544647609	0.808426247613314
2008215	17	0.130524250491912	0.779324315862153
2008215	18	0.144287175347526	0.749957045965643
2008215	19	0.196432808855692	0.874551902554681
2008215	20	0.254165176511856	1.10952080436114
2008215	21	0.281072616744995	1.27062810450526
2008215	22	0.276034869520842	1.34996360252
2008215	23	0.213621039573961	1.09233898793244
2008216	0	0.227008563618155	1.06470700011182
2008216	1	0.218665544896497	1.02408171522425
2008216	2	0.122546269955912	0.50493701589658
2008216	3	0.0944845237353084	0.34706448083087
2008216	4	0.110158064726188	0.343571313684426
2008216	5	0.117233708244105	0.331715336384581
2008216	6	0.10350575547174	0.290154966916499
2008216	7	0.0815839890614947	0.234158507188949
2008216	8	0.0736381683584795	0.197079742414402
2008216	9	0.0686852017999412	0.187872375314536
2008216	10	0.0280577135983068	0.0833713689450307
2008216	11	0.0113907076937438	0.0366826710939828
2008216	12	0.0255576505138969	0.0759879356094808
2008216	13	0.0500851420079912	0.155059027408427
2008216	14	0.0577680030522992	0.178489265916836
2008216	15	0.0654357294565954	0.19314867979521
2008216	16	0.0680877550367241	0.199638938418149
2008216	17	0.0686057673776179	0.209841869173159
2008216	18	0.0681588448193591	0.21905717954012
2008216	19	0.0708240771076423	0.232269052925991
2008216	20	0.0769729792074873	0.262203812909521
2008216	21	0.0914804324350639	0.310921376835002
2008216	22	0.098289951925006	0.324715255748692
2008216	23	0.0941514721178559	0.318014599051232
2008217	0	0.0849395280724222	0.300297107968587
2008217	1	0.0773009516941802	0.263550081197707
2008217	2	0.0719325062370141	0.235492153750842
2008217	3	0.0691005297091504	0.243108522885777
2008217	4	0.0739047761897602	0.301689807772348
2008217	5	0.0832923061740391	0.358794251644912
2008217	6	0.0738941550431809	0.342688491565126
2008217	7	0.0445739106519187	0.240514989041465
2008217	8	0.0280136812784453	0.139253039113031
2008217	9	0.0532935548584407	0.252267499871557
2008217	10	0.0744308016192299	0.343675002809922
2008217	11	0.0880056564358647	0.410128757205668
2008217	12	0.102841001424629	0.484897403315664
2008217	13	0.116193465153535	0.535999703367068
2008217	14	0.130713238141554	0.57711794900865
2008217	15	0.122314745981478	0.569925371590597
2008217	16	0.0816141357065922	0.469201125172602
2008217	17	0.0663484522641457	0.394203443319031
2008217	18	0.0896089840111646	0.534611757483058
2008217	19	0.083756785884022	0.578613039460491
2008217	20	0.0589193973264647	0.448502415682733
2008217	21	0.0522652848134322	0.383297140003863
2008217	22	0.0524462371352192	0.358684197636698
2008217	23	0.0586913644580991	0.380119691263846
2008218	0	0.0732043806327269	0.44344850421759
2008218	1	0.0921157670575791	0.540303423833164
2008218	2	0.116527324346213	0.674278012988784
2008218	3	0.126518084631045	0.728218324460281
2008218	4	0.132091988396866	0.756859300299086
2008218	5	0.138626620407486	0.775967706774878
2008218	6	0.139774955842327	0.772558424412719
2008218	7	0.130830738760177	0.745996894208974
2008218	8	0.125603437431437	0.678389502258659
2008218	9	0.114930435176729	0.589533900549481
2008218	10	0.101334106121753	0.486733397471109
2008218	11	0.0858704679795855	0.380089116584874
2008218	12	0.0658753661834019	0.286902830478159
2008218	13	0.0612241465142732	0.255801336354557
2008218	14	0.0602893328791177	0.246571943075163
2008218	15	0.057823401984405	0.235682386116591
2008218	16	0.0544583477371781	0.213945658052606
2008218	17	0.05221493667468	0.194841966759842
2008218	18	0.0479266812772778	0.177193965135582
2008218	19	0.0442366305444998	0.166211312044883
2008218	20	0.0418630671959391	0.161255416129597
2008218	21	0.041186464819227	0.161562517035095
2008218	22	0.0412587847383711	0.16470353765826
2008218	23	0.046067527064744	0.177330658434076
2008219	0	0.0559392696316017	0.205623482913382
2008219	1	0.0698208005120535	0.249533640054352
2008219	2	0.0858471029433239	0.314513533662072
2008219	3	0.104928454847366	0.384985091330163
2008219	4	0.11137856590898	0.402897165572034
2008219	5	0.118603300228301	0.398351521103353
2008219	6	0.127795577958619	0.371753788694633
2008219	7	0.0990198164400844	0.283185804545596
2008219	8	0.0517508409514684	0.141726454800811
2008219	9	0.0186904972870698	0.0631054673295821
2008219	10	0.0138155047544056	0.0504793272030284
2008219	11	0.0145868597821982	0.0548335943631348
2008219	12	0.0230819395865144	0.0983825424120669
2008219	13	0.040185187781751	0.172504616402549
2008219	14	0.0464508530416498	0.191003539905807
2008219	15	0.0437211330294725	0.17174326731338
2008219	16	0.0381422874815319	0.144357143759604
2008219	17	0.0324355289806401	0.11020052491231
2008219	18	0.0247149014764563	0.0819767916670894
2008219	19	0.022818787936952	0.0935991653820247
2008219	20	0.0218785633409508	0.123412120093008
2008219	21	0.0226098276559933	0.141871494859331
2008219	22	0.0349880609120406	0.260533237650447
2008219	23	0.0554220322917182	0.465180055654756
2008220	0	0.0658856235405236	0.543107448170439
2008220	1	0.0654943051336495	0.494583356594063
2008220	2	0.0529656148581062	0.392428514076871
2008220	3	0.0493728525908351	0.321183173902254
2008220	4	0.042304113585227	0.234699709685718
2008220	5	0.0326077820687826	0.153933980547016
2008220	6	0.0236931872772563	0.102518678772751
2008220	7	0.0191087883987996	0.0720295858503086
2008220	8	0.0154321152657929	0.0521055756184699
2008220	9	0.0126742351726645	0.0371166937175672
2008220	10	0.0107569074033009	0.0301716408855122
2008220	11	0.0100264455980928	0.0279241921985113
2008220	12	0.00964787798930502	0.0264666949778738
2008220	13	0.00969931234849381	0.0260359702421398
2008220	14	0.00970933412760119	0.0270221000350269
2008220	15	0.0101043212503982	0.0316086967681236
2008220	16	0.01085206111543	0.0377680941586454
2008220	17	0.00820856752646452	0.0306441220839084
2008220	18	0.00691003766652215	0.0269454583469938
2008220	19	0.0066543677238301	0.02489322331585
2008220	20	0.00478860913015659	0.0207389068387943
2008220	21	0.00333116418800159	0.0184435931953201
2008220	22	0.00294428294107583	0.0176272949140628
2008220	23	0.00412260857478402	0.0255561992068693
2008221	0	0.00442808433585908	0.0254473877278188
2008221	1	0.00446942850856202	0.0255229729000589
2008221	2	0.00426535980996011	0.0360254746993203
2008221	3	0.00542046870208294	0.0556559693631099
2008221	4	0.00986110454955616	0.0842504137670029
2008221	5	0.0197013209774199	0.13776591557635
2008221	6	0.0308007420926633	0.189024808243635
2008221	7	0.0565443143248496	0.36355072461616
2008221	8	0.120711793551236	0.850391945369735
2008221	9	0.149577076416963	1.21640177810065
2008221	10	0.139789283227025	1.19333604860293
2008221	11	0.154369214510205	1.35175413508942
2008221	12	0.195820023715805	1.82875610802359
2008221	13	0.291818896941899	2.33384138830183
2008221	14	0.373260942875021	2.47313105844154
2008221	15	0.476448821653816	2.93027623954861
2008221	16	0.615708634492844	3.69915942678802
2008221	17	0.725004956850831	4.30284768338086
2008221	18	0.805200786648273	4.73702018655623
2008221	19	0.744235783482789	4.41533894163774
2008221	20	0.712214977365094	4.1883075457986
2008221	21	0.666651873728931	3.89620821768937
2008221	22	0.625278698388898	3.64473770906457
2008221	23	0.625807747267978	3.6369036035964
2008222	0	0.629923527227367	3.69895745680604
2008222	1	0.59530258479731	3.49107684436983
2008222	2	0.585603256630235	3.46957540721631
2008222	3	0.570798816272395	3.28986652712982
2008222	4	0.561566088165542	3.14473441258881
2008222	5	0.541867438642248	2.97582264406902
2008222	6	0.519231959704757	2.86212637465547
2008222	7	0.551609532274054	2.96767109885485
2008222	8	0.582927825246994	3.06919720581979
2008222	9	0.597636931478774	3.11512747706632
2008222	10	0.629824011097124	3.16118744315199
2008222	11	0.673832438769249	3.28800634195306
2008222	12	0.674936140873914	3.22548769684414
2008222	13	0.734035329898195	3.12495252871539
2008222	14	0.690896273283967	2.55832049940164
2008222	15	0.351002982989147	1.27562726388215
2008222	16	0.269770420927269	1.05294716411661
2008222	17	0.333506615925656	1.48818200936314
2008222	18	0.383275253546251	1.6844950217324
2008222	19	0.279932009895606	1.4751672738196
2008222	20	0.268560577170402	1.34711319621536
2008222	21	0.206240628236676	1.07330469633977
2008222	22	0.16348867530675	0.879908442349541
2008222	23	0.113463078704131	0.771551611330527
2008223	0	0.0624003138409737	0.574319235569283
2008223	1	0.0651506258472148	0.68249255579156
2008223	2	0.117575432059493	1.07620232448811
2008223	3	0.25822693047337	2.02915353808103
2008223	4	0.269514684787137	1.85348488918842
2008223	5	0.249048013590251	1.68191945132087
2008223	6	0.135904964864346	1.28447019234464
2008223	7	0.0281452562891415	0.296290998527529
2008223	8	0.168968758102113	1.38888086879571
2008223	9	0.210482054760424	2.11881242349579
2008223	10	0.128865539577101	1.46241781080673
2008223	11	0.101426859201085	1.16982546787376
2008223	12	0.1038559804461	1.17173381427072
2008223	13	0.121554879538854	1.01352319758503
2008223	14	0.165774484777414	1.16457307669569
2008223	15	0.176624038336881	1.17802998780237
2008223	16	0.190585933934429	1.03956141205312
2008223	17	0.139312245526418	0.791592552918081
2008223	18	0.132576266063625	0.813749032195873
2008223	19	0.162674156261501	0.91433886859017
2008223	20	0.231208467436078	1.13209516046491
2008223	21	0.301376800525065	1.35897480402065
2008223	22	0.32597053994309	1.51618536720196
2008223	23	0.320390918029196	1.59942406760859
2008224	0	0.256746580846823	1.44071899745856
2008224	1	0.196046928483629	1.20729195351025
2008224	2	0.179733901218582	1.07719562844531
2008224	3	0.240389701576136	1.38962338757112
2008224	4	0.265659274035965	1.49245717089507
2008224	5	0.31321521830174	1.58752717092067
2008224	6	0.290837861401136	1.45831424185922
2008224	7	0.258938270418279	1.28088145611592
2008224	8	0.292366890960388	1.4008815745893
2008224	9	0.3392911144728	1.60994385206265
2008224	10	0.328089670863708	1.57410269726944
2008224	11	0.287720725111319	1.48715059329905
2008224	12	0.224387761507448	1.17324544805778
2008224	13	0.235172597520571	1.14707180153371
2008224	14	0.280037923547298	1.39799368272306
2008224	15	0.309139012879346	1.45529066753952
2008224	16	0.316892943421425	1.37019347792995
2008224	17	0.301105708007628	1.27056751560191
2008224	18	0.296153143486536	1.20509362804645
2008224	19	0.297519538128268	1.16541834581039
2008224	20	0.303776815785947	1.14943420575748
2008224	21	0.316510334211635	1.16042490264349
2008224	22	0.320893820092258	1.16907938709906
2008224	23	0.308317949564422	1.1377590952007
2008225	0	0.280441197357654	1.06653245537326
2008225	1	0.251149816834316	0.948136776539297
2008225	2	0.194079573519619	0.715980375570487
2008225	3	0.102075687729009	0.390002376473263
2008225	4	0.0725467990484731	0.274603720169952
2008225	5	0.0829712890702602	0.271115917796025
2008225	6	0.095657679314993	0.30965071061874
2008225	7	0.0862125435698416	0.308297969442588
2008225	8	0.0696792631800634	0.254864985299136
2008225	9	0.065342333002224	0.241800198190327
2008225	10	0.0613496855083287	0.236934146092535
2008225	11	0.050457050971643	0.205107911891293
2008225	12	0.0436609377029852	0.172366706799315
2008225	13	0.0233324868570431	0.137133422333445
2008225	14	0.00401366868643117	0.0570369878956359
2008225	15	0.00843194197413623	0.0808659051963259
2008225	16	0.0428651253444907	0.321554279979023
2008225	17	0.121115849969516	0.97308091778002
2008225	18	0.216025108427175	1.74401988441514
2008225	19	0.282808640927533	1.87669493530982
2008225	20	0.335784718076897	2.10017154153589
2008225	21	0.36935452821557	2.31643558014727
2008225	22	0.38719263861492	2.32276102849656
2008225	23	0.409610831976406	2.43520700659457
2008226	0	0.428244481239376	2.57816748266038
2008226	1	0.401132254331149	2.50435707782902
2008226	2	0.404630709098747	2.39719174032461
2008226	3	0.3774427803297	2.20178043008999
2008226	4	0.325475587675802	1.97501045922202
2008226	5	0.29516694841636	1.85996512819018
2008226	6	0.287816371448708	1.9009185486793
2008226	7	0.300720251945945	2.04234566474084
2008226	8	0.293392904908956	1.99702180577306
2008226	9	0.313571035480364	2.10217411635026
2008226	10	0.332820295518698	2.18785406650744
2008226	11	0.338155313460138	2.18573371825004
2008226	12	0.347258052910505	2.15737322592166
2008226	13	0.314118724432234	1.94369783971147
2008226	14	0.316861640634681	1.80937849245726
2008226	15	0.281605079943941	1.67801196577102
2008226	16	0.22141804799108	1.44437757980117
2008226	17	0.329807367335086	1.81748016240517
2008226	18	0.386002591181011	2.0837606028665
2008226	19	0.380895605523266	2.06683892616743
2008226	20	0.253362352144748	1.8175568147341
2008226	21	0.214108854228209	1.85854099376867
2008226	22	0.281384579264988	2.27939907869277
2008226	23	0.34093032439574	2.39572981796272
2008227	0	0.298159294290999	1.98500037458883
2008227	1	0.235394340505268	1.70533991715899
2008227	2	0.266411528712553	2.00454832436733
2008227	3	0.383284913850153	2.67406608688366
2008227	4	0.337227065929546	1.95983610416629
2008227	5	0.194486084075062	0.986127015420251
2008227	6	0.199514998358592	0.928190898416201
2008227	7	0.234651163502303	1.01355527632166
2008227	8	0.253482211601912	1.051968546907
2008227	9	0.253165477997895	1.0296522519895
2008227	10	0.245103805700686	0.972719865241528
2008227	11	0.228270993905829	0.888691555732169
2008227	12	0.212190067887144	0.804253791179159
2008227	13	0.183251315881755	0.711377067799788
2008227	14	0.147438114748276	0.586411719661471
2008227	15	0.108255660274485	0.422713436058468
2008227	16	0.0725696412286405	0.261792713041397
2008227	17	0.03835295517485	0.137062090948121
2008227	18	0.0239824722528355	0.0897088901417681
2008227	19	0.0192453252999703	0.0754967551353113
2008227	20	0.0200819710725999	0.0777371743513231
2008227	21	0.0208030312322168	0.0821822731395716
2008227	22	0.017706432552914	0.0725179187475754
2008227	23	0.0148091445033558	0.0574530170882106
2008228	0	0.0171353919746342	0.0669283379445824
2008228	1	0.0249153297833302	0.0957157347738796
2008228	2	0.0372731315753503	0.141059603250081
2008228	3	0.0468803443270068	0.181356566854603
2008228	4	0.0429967974588774	0.16981921396684
2008228	5	0.0301637582043033	0.120536428142454
2008228	6	0.0276607871743275	0.104725768163548
2008228	7	0.0282265281198907	0.111316773336446
2008228	8	0.0298583860221357	0.130576682926444
2008228	9	0.0406808644918898	0.17784374091517
2008228	10	0.0572268698929334	0.243141632592965
2008228	11	0.0732676130117668	0.316687228198612
2008228	12	0.101062235801658	0.419589067259301
2008228	13	0.151906456109723	0.599167535531853
2008228	14	0.216351110560347	0.816901445997259
2008228	15	0.268614836232215	0.986773428917224
2008228	16	0.296426217036945	1.06441533666895
2008228	17	0.313471846747951	1.09625956638925
2008228	18	0.321398733136664	1.11250190572934
2008228	19	0.321088608177515	1.11347940495985
2008228	20	0.314270051155992	1.10010540034979
2008228	21	0.306012165690045	1.07944805772623
2008228	22	0.298240962195766	1.05527506628985
2008228	23	0.288900407442654	1.02208793817299
2008229	0	0.274178768949294	0.965067740301021
2008229	1	0.251301353969091	0.894433736282478
2008229	2	0.227767500200883	0.832794634541264
2008229	3	0.212880568716684	0.776934780830615
2008229	4	0.19800185297379	0.725156860067292
2008229	5	0.188820772041483	0.68674176026632
2008229	6	0.180478825201012	0.666115967211529
2008229	7	0.173450950433994	0.658011062565524
2008229	8	0.175879134450316	0.660240545672638
2008229	9	0.176530861175417	0.643230014715391
2008229	10	0.175712971354406	0.619213542790858
2008229	11	0.176558387482667	0.610557081507326
2008229	12	0.174954888174615	0.594483793373301
2008229	13	0.17551988216603	0.583792004336741
2008229	14	0.180013365255893	0.586982699230902
2008229	15	0.182291399982537	0.590098194280975
2008229	16	0.178481053410591	0.585850480788123
2008229	17	0.171972284238071	0.567439825351382
2008229	18	0.15672689006714	0.519899776646423
2008229	19	0.138652144424627	0.447289905204173
2008229	20	0.126029816679611	0.403158105743892
2008229	21	0.116930047440653	0.38474264123217
2008229	22	0.104204430534458	0.371159870858841
2008229	23	0.0930640170578438	0.350916039359643
2008230	0	0.0803071391224122	0.320249684220725
2008230	1	0.0761798426537481	0.298062979427055
2008230	2	0.0850139850361442	0.309258195506869
2008230	3	0.0985766416154651	0.338449378999915
2008230	4	0.108247866446826	0.357041205693078
2008230	5	0.113822366887723	0.354300584211944
2008230	6	0.120001702627039	0.358016228252179
2008230	7	0.126849419253696	0.369735559965876
2008230	8	0.140297868426085	0.371817126548159
2008230	9	0.154083343470001	0.342259378403946
2008230	10	0.132273548137999	0.272677364441574
2008230	11	0.115594220200219	0.231574604358723
2008230	12	0.110756434508798	0.219769207400756
2008230	13	0.108106537056878	0.214730438237467
2008230	14	0.106343670659137	0.212786011560389
2008230	15	0.105078510443195	0.212087096002991
2008230	16	0.101811677406763	0.207240553583931
2008230	17	0.097692848903578	0.198256294687326
2008230	18	0.0926803351921597	0.186823214894407
2008230	19	0.0866881659481736	0.173560804340066
2008230	20	0.0816562430727211	0.158438837069164
2008230	21	0.0779475456247792	0.148639311984471
2008230	22	0.0736060776140211	0.146772257782427
2008230	23	0.0700639156671345	0.146535579266964
2008231	0	0.0693955502740552	0.146900342082121
2008231	1	0.0704777565446449	0.149268273360139
2008231	2	0.0729966723648671	0.157128897213145
2008231	3	0.0746756601508307	0.169469633005452
2008231	4	0.0765608283972368	0.186799586684828
2008231	5	0.0711899972222194	0.19261813950489
2008231	6	0.0567962632372611	0.188513138928549
2008231	7	0.0446958566819408	0.154682497915367
2008231	8	0.0359068066194405	0.130043757304786
2008231	9	0.0722931850816922	0.232216639575074
2008231	10	0.0923305472753657	0.307147559125542
2008231	11	0.113231887167389	0.41077366589998
2008231	12	0.160066436381091	0.622493788868733
2008231	13	0.224187663844805	0.828901064524104
2008231	14	0.302164612111106	0.94501156140752
2008231	15	0.355446423076867	0.955021144568157
2008231	16	0.379512973821135	0.913032930689278
2008231	17	0.323840206768956	0.746654810607054
2008231	18	0.186086047545972	0.37729844572714
2008231	19	0.147475816425881	0.285738408855631
2008231	20	0.113324023883863	0.251775970122962
2008231	21	0.153183614472906	0.415732356423391
2008231	22	0.175171510895498	0.555110181512116
2008231	23	0.183290986839087	0.582294452371285
2008232	0	0.145891423327994	0.482924502483803
2008232	1	0.0838265124433654	0.370285955264764
2008232	2	0.0894886045434166	0.427954034893767
2008232	3	0.131225138979244	0.56976585972603
2008232	4	0.114194051036142	0.50641015637951
2008232	5	0.096104454274116	0.44437775381737
2008232	6	0.108737794559772	0.46165390664009
2008232	7	0.131744987070225	0.541802219526947
2008232	8	0.142207786672055	0.581900545260913
2008232	9	0.110974462125624	0.482456500415165
2008232	10	0.133303812540814	0.511719181809327
2008232	11	0.193507661601066	0.755338321467228
2008232	12	0.183553025031869	0.710060286605466
2008232	13	0.225640882469539	0.840301207591897
2008232	14	0.261773623381041	0.946050925770289
2008232	15	0.226941704221096	0.892964269199965
2008232	16	0.211923711377786	0.939501754012096
2008232	17	0.243086100045321	1.09056955989903
2008232	18	0.263537213727905	1.16444873838856
2008232	19	0.23814716638212	1.11935647907076
2008232	20	0.197901647027767	1.05705794064275
2008232	21	0.178822646543391	1.07804761935619
2008232	22	0.137178643605191	0.99478195224395
2008232	23	0.121134259325409	0.906740119609163
2008233	0	0.127692146583995	0.92010770801164
2008233	1	0.169859661310424	1.21065422550953
2008233	2	0.192533211217772	1.50500241602687
2008233	3	0.21058233602686	1.65357148710455
2008233	4	0.197165652195536	1.41822048688738
2008233	5	0.188351550540727	1.43079735619786
2008233	6	0.183759772620604	1.32436251397346
2008233	7	0.195183455491148	1.29153998213849
2008233	8	0.206900651506312	1.28781917502625
2008233	9	0.222933567019427	1.31104047633917
2008233	10	0.232830812495149	1.34572037465157
2008233	11	0.243166650414182	1.41220864302135
2008233	12	0.250731218976696	1.4903475313386
2008233	13	0.24405632012319	1.52965776820331
2008233	14	0.213118408775424	1.39695604674253
2008233	15	0.180406150350542	1.19841710607612
2008233	16	0.172256010169069	1.06903381371627
2008233	17	0.159100207899952	0.922037748189774
2008233	18	0.143738213464514	0.719090612126494
2008233	19	0.127411369253356	0.593882260123237
2008233	20	0.119200839389441	0.521621850759279
2008233	21	0.100414765557361	0.398213464404557
2008233	22	0.0817068751896185	0.283694649042439
2008233	23	0.0641331891569737	0.206523015129292
2008234	0	0.0479861772911956	0.15418514513972
2008234	1	0.0324404109691067	0.101230327504927
2008234	2	0.023390590883935	0.0704162348178874
2008234	3	0.0585689632898391	0.169902293016823
2008234	4	0.135853449260213	0.425940377473023
2008234	5	0.162553986272244	0.552820095960029
2008234	6	0.175574992072673	0.575517435792021
2008234	7	0.17229029379381	0.509013272110033
2008234	8	0.140258481274998	0.367085509472463
2008234	9	0.0943268204309633	0.265346339119848
2008234	10	0.0764257333359024	0.223371837585568
2008234	11	0.0719440703745323	0.208437110741332
2008234	12	0.0748092218347035	0.200648517316527
2008234	13	0.0826211070883731	0.220096419796267
2008234	14	0.0839617470859241	0.229227671634298
2008234	15	0.0827955776505883	0.229938806859285
2008234	16	0.0807769115875764	0.240701016601164
2008234	17	0.0775877430707893	0.241537038151835
2008234	18	0.0633643866565581	0.212250744395812
2008234	19	0.0536901408321354	0.192636637894752
2008234	20	0.0398489554201886	0.160078385076004
2008234	21	0.0313720509908192	0.14696268832703
2008234	22	0.0417533859408677	0.199176435150028
2008234	23	0.0707000082157051	0.306620507724541
2008235	0	0.0887166096109133	0.369700328023084
2008235	1	0.0865674974013082	0.355132479215533
2008235	2	0.0798235940496868	0.327561885951616
2008235	3	0.078501115564152	0.29214978613316
2008235	4	0.0824006466170066	0.283993544562886
2008235	5	0.10597544942773	0.354209351636361
2008235	6	0.107867580133011	0.3554052036095
2008235	7	0.080577201019036	0.274959461747892
2008235	8	0.0320520848350762	0.132694703731264
2008235	9	0.019297169028752	0.0784590733471995
2008235	10	0.00998711378098882	0.0378839574170643
2008235	11	0.0053833205344682	0.0209317348026703
2008235	12	0.00949499836452486	0.0393933295390675
2008235	13	0.033852783661489	0.146902602815721
2008235	14	0.0708281526344665	0.281917767068412
2008235	15	0.0950997088143303	0.336126341009449
2008235	16	0.111438374813365	0.362901727899279
2008235	17	0.11020626160938	0.385190997985015
2008235	18	0.104681838889125	0.447699249896289
2008235	19	0.125155344078019	0.596433717139019
2008235	20	0.157299685183006	0.775336939735078
2008235	21	0.177344476694508	0.881973175655349
2008235	22	0.179039832322293	0.926727619098806
2008235	23	0.17428919148952	0.928294906932825
2008236	0	0.170807002255055	0.887236002858064
2008236	1	0.158052775479496	0.806072675452431
2008236	2	0.153177205334702	0.756642917088514
2008236	3	0.154373240812716	0.725998536343756
2008236	4	0.160972203985505	0.709565130754097
2008236	5	0.157323364809475	0.661377332727061
2008236	6	0.152891874597141	0.61830658722642
2008236	7	0.148251034460278	0.585367251504079
2008236	8	0.142624385637618	0.552278494859651
2008236	9	0.135013459267347	0.514505436892165
2008236	10	0.123555833188758	0.466403810311768
2008236	11	0.114143922935148	0.42263216125218
2008236	12	0.108562610678804	0.394326219586329
2008236	13	0.103998314819103	0.373377726516982
2008236	14	0.100023971315562	0.361497132901782
2008236	15	0.100260533602171	0.362249909364147
2008236	16	0.0983581234318742	0.356720351164417
2008236	17	0.0958692368473105	0.354544307787153
2008236	18	0.0949660140909414	0.35607658889097
2008236	19	0.0949720616780306	0.355394159177477
2008236	20	0.0957674951401975	0.354836295481582
2008236	21	0.0958996517797407	0.353462625696087
2008236	22	0.0959289572312219	0.354048097659704
2008236	23	0.0960398495761294	0.358549143745607
2008237	0	0.0970256384462453	0.363081249241823
2008237	1	0.0986017078680124	0.366043477690865
2008237	2	0.0979910302170408	0.362037017580388
2008237	3	0.0892218665939717	0.324009188347306
2008237	4	0.0614061044666857	0.222974578746695
2008237	5	0.0322686483556442	0.117701489448002
2008237	6	0.0194693489955288	0.0694090571107423
2008237	7	0.0178497511586334	0.0631996465800378
2008237	8	0.0190358646621411	0.0668906654190891
2008237	9	0.0195969742315949	0.0694616467889033
2008237	10	0.021727180610526	0.0760904241349201
2008237	11	0.0286469320173863	0.0974566357737432
2008237	12	0.0500688975128112	0.150417285445187
2008237	13	0.0603588129038725	0.17505581531785
2008237	14	0.0675042179567844	0.183225142051965
2008237	15	0.105902695933127	0.28931698446736
2008237	16	0.164863859459207	0.467492051934466
2008237	17	0.136634888609033	0.39186786446928
2008237	18	0.0868490300474944	0.273268555555309
2008237	19	0.0824807493683268	0.277564145993269
2008237	20	0.114829406300999	0.407680723513524
2008237	21	0.144100722774483	0.530085760513061
2008237	22	0.153048562798677	0.589792526310413
2008237	23	0.13738560099595	0.55841505759875
2008238	0	0.125825603494466	0.536931075287251
2008238	1	0.113495537269613	0.514082944084883
2008238	2	0.100024666154228	0.481280875817168
2008238	3	0.0889224463791466	0.456229707555562
2008238	4	0.0911906793702321	0.49592788762381
2008238	5	0.108979055097001	0.580963508922911
2008238	6	0.122208343362731	0.597782312870848
2008238	7	0.11957601910356	0.572147620259046
2008238	8	0.121655302058323	0.511068414565694
2008238	9	0.125860327220892	0.451169269027383
2008238	10	0.107486580828246	0.386758841414474
2008238	11	0.0833704461136623	0.314624942464145
2008238	12	0.0568682585726617	0.225933620704453
2008238	13	0.0328762224809403	0.11115873326884
2008238	14	0.0287725755734354	0.0928320676712473
2008238	15	0.0386692219679394	0.114855893704029
2008238	16	0.0764012557946413	0.241804601342598
2008238	17	0.167792031290962	0.603659136647947
2008238	18	0.320214452721133	1.16967729096064
2008238	19	0.468285459538117	1.632057579678
2008238	20	0.490651973661714	1.73767992913924
2008238	21	0.513429892921052	1.75531726424376
2008238	22	0.460184574112261	1.72139298099594
2008238	23	0.279508157104485	1.16813430614302
2008239	0	0.200390063261651	0.794516395550723
2008239	1	0.188303143743447	0.736569036578314
2008239	2	0.217145022643174	0.817247543184545
2008239	3	0.217158446276684	0.861005088222784
2008239	4	0.136645096939134	0.638494142899333
2008239	5	0.0942624010927236	0.467441729920704
2008239	6	0.119688557336584	0.557554916754885
2008239	7	0.151073527031127	0.672550535727459
2008239	8	0.155283172045997	0.659585228504242
2008239	9	0.159386606593713	0.616899332336565
2008239	10	0.162169627544406	0.562419298450097
2008239	11	0.166588288116581	0.524173454732578
2008239	12	0.162862040565189	0.507832680058106
2008239	13	0.156809401429844	0.501259001815029
2008239	14	0.156267577770221	0.500123476441645
2008239	15	0.154348343271451	0.498152795699353
2008239	16	0.158247772037134	0.51272124435086
2008239	17	0.163512616845457	0.551585733897993
2008239	18	0.167981512135233	0.578600164229695
2008239	19	0.17438994729782	0.594582719837256
2008239	20	0.188985556477027	0.604044396798068
2008239	21	0.201451039539659	0.605906931479738
2008239	22	0.219260139437655	0.642157449701052
2008239	23	0.236568201008328	0.778546833786747
2008240	0	0.246787363091409	0.883612704404606
2008240	1	0.345515394118918	1.22288772977734
2008240	2	0.363054684276357	1.38692959651396
2008240	3	0.364781214701106	1.41770649687313
2008240	4	0.373606513789026	1.36576644624663
2008240	5	0.343881551248	1.29611492415236
2008240	6	0.34366072274891	1.29685045947466
2008240	7	0.344647035462557	1.30014954127217
2008240	8	0.349675910672066	1.35852573500187
2008240	9	0.381929229252631	1.50443835613606
2008240	10	0.405816551685996	1.70747412503945
2008240	11	0.447901630452832	1.76566948380536
2008240	12	0.441918995016004	1.78533456075251
2008240	13	0.474479596205696	2.09348176972993
2008240	14	0.471398858215893	2.30740831921543
2008240	15	0.494483114724991	2.49125369440515
2008240	16	0.485608352090637	2.49058564649725
2008240	17	0.509756648407268	2.39765485509163
2008240	18	0.481327234886564	2.33092602510781
2008240	19	0.484996567019158	2.3570640819486
2008240	20	0.442751924093495	2.33613204057479
2008240	21	0.324566758213649	1.74560838013691
2008240	22	0.303216375900226	1.64380004659832
2008240	23	0.28628951607494	1.56620807047879
2008241	0	0.272306947968032	1.40461839409791
2008241	1	0.256071415542505	1.27306628208734
2008241	2	0.24371980850803	1.28075159955423
2008241	3	0.254318481812808	1.37037966440669
2008241	4	0.247908982288317	1.46161759925779
2008241	5	0.250812411017435	1.46501368491255
2008241	6	0.236785177923031	1.37458411947097
2008241	7	0.231014130473435	1.27186739226986
2008241	8	0.220950002488998	1.26309122823296
2008241	9	0.179832475554412	1.2516108779682
2008241	10	0.143777498460206	1.24681499984077
2008241	11	0.142714819390341	1.19651680567232
2008241	12	0.114152023379809	1.0778697102298
2008241	13	0.118246213665054	1.08048717189347
2008241	14	0.137665518966889	1.16854370989185
2008241	15	0.187975236471791	1.32794458382503
2008241	16	0.203899026051563	1.41707816783815
2008241	17	0.140379642890812	1.22637402856067
2008241	18	0.0806964256407894	0.645423060944988
2008241	19	0.06619780270086	0.447543480248104
2008241	20	0.0960161340159536	0.470870155588688
2008241	21	0.130772750187578	0.554794425171872
2008241	22	0.228802788487708	0.891210422244802
2008241	23	0.317474521360252	1.22491227738025
2008242	0	0.374214319205424	1.42372192416508
2008242	1	0.392179215325749	1.4288830201024
2008242	2	0.393972157251609	1.39507436497502
2008242	3	0.396870005203683	1.37769734875754
2008242	4	0.401803164623728	1.37439447242287
2008242	5	0.405504649647873	1.39525021231845
2008242	6	0.406548992933214	1.40742123841928
2008242	7	0.392103940569685	1.38268265828632
2008242	8	0.385373224550248	1.35425148753959
2008242	9	0.380189564913665	1.28918423010079
2008242	10	0.360989904927239	1.21617058515455
2008242	11	0.328529374418125	1.10702782655533
2008242	12	0.299673460673392	0.990817427238009
2008242	13	0.279290751731038	0.90837835133173
2008242	14	0.260122677007063	0.844512483375658
2008242	15	0.243041034203997	0.783057913634707
2008242	16	0.231112654250104	0.736079484388824
2008242	17	0.226884262543434	0.71475038230567
2008242	18	0.224105563198445	0.70331500575718
2008242	19	0.221258148473064	0.699613795452969
2008242	20	0.22000243959311	0.701313801293763
2008242	21	0.21812827342732	0.704938315637323
2008242	22	0.215513575360917	0.709097111367537
2008242	23	0.208440180003836	0.709809270349478
2008243	0	0.202975222719981	0.707363132346071
2008243	1	0.200135563017045	0.701851928459576
2008243	2	0.192638037239167	0.692533873761763
2008243	3	0.191972763422981	0.68060806838387
2008243	4	0.188632785582519	0.670045084074988
2008243	5	0.184997336535316	0.659099913045612
2008243	6	0.181920405711846	0.651624649086403
2008243	7	0.17904926241131	0.645305161220076
2008243	8	0.176252404696576	0.636656409695557
2008243	9	0.173867249516686	0.627933792618316
2008243	10	0.171512007412246	0.620881985939704
2008243	11	0.172907515996442	0.615251619301801
2008243	12	0.174427923915476	0.616189294777776
2008243	13	0.171592944192869	0.614589407784571
2008243	14	0.172178160393315	0.610638911862037
2008243	15	0.170907888200391	0.606177708486072
2008243	16	0.169952955072544	0.600736648400613
2008243	17	0.163849100785005	0.600070170003286
2008243	18	0.159980690170607	0.611170614222171
2008243	19	0.151561336935423	0.611469730520138
2008243	20	0.140308413034918	0.60867350351482
2008243	21	0.13127982463188	0.601758329265467
2008243	22	0.123830142757804	0.56959476843983
2008243	23	0.109935223572233	0.452656016405021
