# Supplementary material for: A comparison of sea salt emission parameterizations in northwestern Europe using a chemistry transport model setup
Source: Copernicus journal article supplement (doi:10.5194/acp-16-9905-2016), 2016-08-08
Supplement: Supplementary file 2 [file acp-16-9905-2016-supplement.zip › conc/conc.timeseries.values.sum2008.ov14.Na.DE0002R.csv]

doy	hour	pm2.5	pm10
2008183	0	0.0241286215847658	0.0387128649771833
2008183	1	0.0237294866433671	0.0369395272346
2008183	2	0.0234766343509713	0.0358286811542185
2008183	3	0.0233991068392999	0.0354682140810947
2008183	4	0.0231894487023411	0.0354041253511551
2008183	5	0.0216922420006253	0.03494626608794
2008183	6	0.0266249782811423	0.0573372385804941
2008183	7	0.0289302671973534	0.0680502525772786
2008183	8	0.0318630296284447	0.0728653302584211
2008183	9	0.0297729772788077	0.0588187667013782
2008183	10	0.026871704903845	0.0504156096992269
2008183	11	0.0243919117603354	0.0435371397591118
2008183	12	0.0208290568443019	0.0346680700410935
2008183	13	0.0180154723229326	0.0282026760985602
2008183	14	0.0155824655039561	0.0237546573449933
2008183	15	0.013777768234697	0.0206391999283559
2008183	16	0.0124478483992082	0.018524976312786
2008183	17	0.0114632551934591	0.0171692321298062
2008183	18	0.0108145308612709	0.0164534882487954
2008183	19	0.010215331108263	0.0158770035166014
2008183	20	0.00987488653981926	0.0150384013497711
2008183	21	0.00996467215607559	0.0146509160458876
2008183	22	0.0105946848977673	0.0154966297122866
2008183	23	0.0110906976440698	0.0166813767752227
2008184	0	0.0118952886308088	0.0185971391467282
2008184	1	0.0139385846487589	0.0234812710646988
2008184	2	0.0172619572707062	0.03221419218229
2008184	3	0.0202813689092095	0.0412610804633694
2008184	4	0.0224190545343362	0.0467493157636452
2008184	5	0.0244969353520077	0.0486188814435623
2008184	6	0.0254808201206714	0.0465475672023758
2008184	7	0.0238171343658003	0.0402369213085468
2008184	8	0.0211208791049096	0.0340691691492154
2008184	9	0.016878868017256	0.025983034459312
2008184	10	0.0130925774221031	0.0187852159159743
2008184	11	0.0110973149247081	0.0151114333801865
2008184	12	0.00985016995022711	0.0129017866924838
2008184	13	0.00874101407708101	0.0112612789264908
2008184	14	0.00819625916331656	0.0103686299206533
2008184	15	0.00774414285659841	0.0097460566531362
2008184	16	0.00743775870230735	0.0094144004185644
2008184	17	0.0071327326064141	0.00917797366301145
2008184	18	0.0068140804996031	0.0088904175688175
2008184	19	0.00622271316659042	0.00815751197620036
2008184	20	0.0056862675670714	0.00702070743813349
2008184	21	0.00554512456929076	0.00663382359662524
2008184	22	0.00556956080138086	0.00668102917509439
2008184	23	0.00671671500400874	0.00789268169417406
2008185	0	0.00865437655453302	0.0101492520987119
2008185	1	0.0104144551683836	0.0121673916500502
2008185	2	0.0115427256520832	0.0135521013383722
2008185	3	0.0120262108282051	0.0142513912117968
2008185	4	0.0117139546237561	0.0141905405281911
2008185	5	0.0109704124574622	0.0136035787307714
2008185	6	0.0102674363916698	0.0127463707279861
2008185	7	0.00893595415797819	0.0109046932086372
2008185	8	0.00745156522404134	0.00905303569844565
2008185	9	0.00674652338742662	0.00824883124632105
2008185	10	0.00621072578794827	0.00770488819689822
2008185	11	0.00565209000168243	0.00713826878378128
2008185	12	0.00513045958891904	0.0066204853233104
2008185	13	0.00463833912775407	0.00610170203569012
2008185	14	0.0043031493650408	0.00579069765238216
2008185	15	0.00406457197114946	0.00556065933718621
2008185	16	0.0035578206110712	0.00499083826788751
2008185	17	0.00173112785524419	0.00282831817638449
2008185	18	0.000464266964358209	0.000808106771326595
2008185	19	0.000368888796178285	0.000674342038214474
2008185	20	0.00136476319050876	0.00314425947569904
2008185	21	0.00716742310012756	0.0191828067813514
2008185	22	0.0177659137240213	0.0437086654908467
2008185	23	0.021256651093702	0.061893359796876
2008186	0	0.0130333597842157	0.049790542373774
2008186	1	0.00897343983516113	0.0398912890301472
2008186	2	0.00769452595057727	0.0322872764228366
2008186	3	0.00770169936565427	0.0279759548234128
2008186	4	0.00822621786796015	0.0247707537317325
2008186	5	0.00800351053978696	0.0215878409298663
2008186	6	0.00587318041796517	0.0166341237199102
2008186	7	0.0044152599327919	0.0110262767345055
2008186	8	0.00319250737979101	0.00722343018112058
2008186	9	0.0020417769361517	0.00474618735643498
2008186	10	0.00126866050719433	0.00344782272619969
2008186	11	0.000927912207545646	0.0030030755983431
2008186	12	0.000692273765912129	0.00290859427263098
2008186	13	0.000718381289689549	0.00309738737544898
2008186	14	0.000956187791332153	0.00359572818838679
2008186	15	0.00099892730302435	0.0040169985193305
2008186	16	0.001162924506623	0.00518193050244615
2008186	17	0.00111009571718224	0.0056118237112245
2008186	18	0.00144526450653651	0.00691948724251639
2008186	19	0.00224679007691635	0.00952289612347887
2008186	20	0.00419736741980671	0.0149874687453368
2008186	21	0.00573740625525078	0.0166754549872056
2008186	22	0.00820433702734177	0.0195512627066062
2008186	23	0.0106903302610386	0.022059591260572
2008187	0	0.0144176244753037	0.0259012936139238
2008187	1	0.0144737152757712	0.0237320537883603
2008187	2	0.0141283695612159	0.0230233590904123
2008187	3	0.0135921749853441	0.0218195241520748
2008187	4	0.0123598334787304	0.0196691595242762
2008187	5	0.0101036184498547	0.0172452968730724
2008187	6	0.00821332558542779	0.0141904823405641
2008187	7	0.00658794876355931	0.0118525395813185
2008187	8	0.00545550138629201	0.0117896730679195
2008187	9	0.00446730082611032	0.00942824572327187
2008187	10	0.00410410863805597	0.00880407740934973
2008187	11	0.00371636216402461	0.00744634323848608
2008187	12	0.00347692622675445	0.00664123633077725
2008187	13	0.00339068213891234	0.00633741295307938
2008187	14	0.00328262471420356	0.00626661300393371
2008187	15	0.00359096816006772	0.00772474754991126
2008187	16	0.00382620794517564	0.00871614418884421
2008187	17	0.00410807806501269	0.00924386050533479
2008187	18	0.00428010129413974	0.00926406610079598
2008187	19	0.00440665294590029	0.00928689904619602
2008187	20	0.00448842883399883	0.00909223414918546
2008187	21	0.00451351349647089	0.00877118469067025
2008187	22	0.0045506523702387	0.00889043255729759
2008187	23	0.00472836459238395	0.0094960358729893
2008188	0	0.00499854077168822	0.0102560893032732
2008188	1	0.00505719583308401	0.0105784758966653
2008188	2	0.00514841847566266	0.0106500880749394
2008188	3	0.00521048834283726	0.0103941234538234
2008188	4	0.00514309501146922	0.00975822627334589
2008188	5	0.00691898914835911	0.0182159772179914
2008188	6	0.0141709169495539	0.0530996523218809
2008188	7	0.0253237041634775	0.102571673454995
2008188	8	0.0313219229579949	0.124363576566505
2008188	9	0.0416971554339099	0.14762444923313
2008188	10	0.031366810392296	0.106242460972333
2008188	11	0.0205543288029391	0.0609946863860138
2008188	12	0.0270061985754772	0.0660246983447415
2008188	13	0.0674779414071872	0.13581830188232
2008188	14	0.0886387634922899	0.167213376039877
2008188	15	0.0919915055284081	0.171515722818642
2008188	16	0.0915146490779164	0.172050775739922
2008188	17	0.0965459657186746	0.177888450183337
2008188	18	0.0909696471547222	0.171478085747303
2008188	19	0.0892552473655595	0.175254844122758
2008188	20	0.0907592027773396	0.18754645320417
2008188	21	0.0980638995786348	0.200879720165767
2008188	22	0.102234593116745	0.203167972063786
2008188	23	0.0950468837878369	0.188824005319974
2008189	0	0.0850759472561825	0.1678942655787
2008189	1	0.0812073198805727	0.15888856191049
2008189	2	0.0807586983074753	0.160556601240465
2008189	3	0.0804962489926298	0.163087606281749
2008189	4	0.0785925146224078	0.163268911636818
2008189	5	0.0786291373952819	0.163949335554736
2008189	6	0.0846537209583096	0.178589990233016
2008189	7	0.11075084726215	0.21217132326623
2008189	8	0.186022446965044	0.351793181834598
2008189	9	0.189412972967903	0.327382868731531
2008189	10	0.131612032202705	0.223728232980316
2008189	11	0.0849725786381838	0.133807798467777
2008189	12	0.0699994310595869	0.109509136877797
2008189	13	0.067394953702485	0.106249823458927
2008189	14	0.0736338201114602	0.112505959942926
2008189	15	0.0825021555742103	0.122452144747211
2008189	16	0.0781306545242482	0.120398583820928
2008189	17	0.0840511193699585	0.136101573066164
2008189	18	0.099958875673801	0.164499863721901
2008189	19	0.11938869750089	0.200444840693997
2008189	20	0.113150031992093	0.191544506212794
2008189	21	0.0685778703822643	0.120166389869872
2008189	22	0.0290627023058875	0.0538143758203323
2008189	23	0.0122671745254977	0.0339938670866392
2008190	0	0.0154622602189256	0.0545604694285037
2008190	1	0.0263953258173885	0.0903382304492967
2008190	2	0.0300668343905798	0.0985306038508606
2008190	3	0.029474531274071	0.0969687716838732
2008190	4	0.0307276370209459	0.0967079643341196
2008190	5	0.0374124057714565	0.101400845660189
2008190	6	0.0441330376426965	0.103861153774209
2008190	7	0.0557372236235163	0.0937118815081334
2008190	8	0.0669586166848037	0.0964113720220748
2008190	9	0.0917225040327045	0.135289870801607
2008190	10	0.109002009327024	0.158537522833701
2008190	11	0.0806151120320593	0.134631388307897
2008190	12	0.0589843767353127	0.125247296703877
2008190	13	0.107719876327531	0.178963428422763
2008190	14	0.153970099099503	0.257947260111562
2008190	15	0.200632656920849	0.337986741106837
2008190	16	0.227608015404503	0.39245038593506
2008190	17	0.260645947716585	0.45357579514815
2008190	18	0.277467836324686	0.478456568104594
2008190	19	0.0901035461430422	0.222087292736617
2008190	20	0.0329637064442199	0.0672312662208056
2008190	21	0.0346077364795582	0.058077477688113
2008190	22	0.0319833032676012	0.046249881673361
2008190	23	0.0368016317849072	0.0537978932939756
2008191	0	0.0515366798613791	0.0770294490005242
2008191	1	0.0650156331906707	0.0984476558046771
2008191	2	0.119774593610428	0.211190701656579
2008191	3	0.226489471727338	0.526119530433773
2008191	4	0.226926159406328	0.563218514009045
2008191	5	0.24483515656012	0.565618237259859
2008191	6	0.252446189857221	0.599369213449347
2008191	7	0.222636718493574	0.511968662214396
2008191	8	0.209926436994968	0.47686212627582
2008191	9	0.227586306600508	0.489212964218765
2008191	10	0.288407294833505	0.547918472443818
2008191	11	0.313428543394414	0.555563741548573
2008191	12	0.2629230257472	0.477957171837542
2008191	13	0.216046331078831	0.397032191276484
2008191	14	0.205256937044733	0.355589740058681
2008191	15	0.196355191212413	0.331930809843928
2008191	16	0.163043114640465	0.295323806102175
2008191	17	0.122726136305596	0.247075619869743
2008191	18	0.0967981046062392	0.201343505547723
2008191	19	0.0823546927968614	0.18551431020154
2008191	20	0.0816997564176533	0.187343420192057
2008191	21	0.0897217417769522	0.205852127263192
2008191	22	0.0942316847703875	0.246441273358983
2008191	23	0.0504329740882026	0.169865425046275
2008192	0	0.00964715178389075	0.0381110153969605
2008192	1	0.00141142594441771	0.00697165255869881
2008192	2	0.00037082418735698	0.00190936378793423
2008192	3	0.000494369276993975	0.00291624707442128
2008192	4	0.00314132349757978	0.0205926915158866
2008192	5	0.00501467709258464	0.0293825811535361
2008192	6	0.00120038946632249	0.00657843804409286
2008192	7	0.000365633648369233	0.00167994797927681
2008192	8	0.021340505720344	0.0672566601982241
2008192	9	0.0822093735708323	0.203689764366413
2008192	10	0.104817950895334	0.228834917972387
2008192	11	0.120797913651467	0.244172914524862
2008192	12	0.108126122486481	0.230759098479909
2008192	13	0.095264891882348	0.219221604818703
2008192	14	0.0934656812507171	0.23178803815687
2008192	15	0.0945145522208699	0.236818163592773
2008192	16	0.0692501027371987	0.187804912384462
2008192	17	0.0490453303530858	0.159325506837798
2008192	18	0.00997843870734474	0.0333445589219994
2008192	19	0.0153861606101244	0.0524940325915534
2008192	20	0.0267871371641646	0.108025155766625
2008192	21	0.0222442869267514	0.104265195557519
2008192	22	0.00543151746927264	0.0294984358323429
2008192	23	0.00184752406861431	0.00978076470044119
2008193	0	0.0057639658504754	0.0317531681218661
2008193	1	0.0142616091166024	0.0807995181701548
2008193	2	0.0264374160452464	0.144661970784238
2008193	3	0.00602637338014512	0.0335526779678398
2008193	4	0.00151221161959006	0.0080094169010732
2008193	5	0.0136311871278033	0.0664190040349596
2008193	6	0.0178152896162761	0.101892840679294
2008193	7	0.0154833843436352	0.100268814110029
2008193	8	0.0285640036524393	0.127498180414406
2008193	9	0.0490736202656551	0.148719205919362
2008193	10	0.0546269962665504	0.140364208490929
2008193	11	0.0528785046208224	0.126126272026321
2008193	12	0.050326230887987	0.115869071035233
2008193	13	0.0416901478039466	0.0996947356374494
2008193	14	0.0233541658531202	0.0631528169570991
2008193	15	0.0175881648339364	0.0477729027495334
2008193	16	0.0211405413044084	0.0618745618873759
2008193	17	0.0196820814962625	0.0667193906680615
2008193	18	0.0193617450957326	0.0730086688055495
2008193	19	0.0172004317774777	0.0763910689003775
2008193	20	0.0149724526881491	0.0720376367857249
2008193	21	0.0127303760015559	0.0606914546824079
2008193	22	0.00785972412103783	0.0380715423726531
2008193	23	0.0110810958945265	0.044649425141155
2008194	0	0.019888697565297	0.0713301562468364
2008194	1	0.0264486490992461	0.103738868233203
2008194	2	0.0235040337270474	0.123014717173992
2008194	3	0.0234866745680732	0.146403531637488
2008194	4	0.0334052788867219	0.170464334313067
2008194	5	0.03740437358992	0.145934750470086
2008194	6	0.0477940989727304	0.142483704682382
2008194	7	0.0601089529744967	0.129975049690041
2008194	8	0.0632992886209852	0.126099256475062
2008194	9	0.0728471293206374	0.127434791923903
2008194	10	0.0616835363750174	0.103452476473204
2008194	11	0.0557005784110813	0.0978785546435401
2008194	12	0.0814965122480781	0.134688446599623
2008194	13	0.112221570946673	0.187396235120645
2008194	14	0.131900346626978	0.197351824030084
2008194	15	0.114947481810426	0.167859521401822
2008194	16	0.0332305151755388	0.0858492651766509
2008194	17	0.00546666397101331	0.0178607441288386
2008194	18	0.00598930462907403	0.0209274000151463
2008194	19	0.0248045594306171	0.0760212552377478
2008194	20	0.0473663917072635	0.120321225417408
2008194	21	0.0577368482573885	0.143510242626027
2008194	22	0.0646899704805398	0.158389454052958
2008194	23	0.0669918474633349	0.15604614727223
2008195	0	0.0640254574058415	0.145013963993555
2008195	1	0.0571051425529209	0.127303392009269
2008195	2	0.0503231202110507	0.113322907404944
2008195	3	0.0447479670914702	0.10213879020422
2008195	4	0.0388860536389461	0.0938436970337159
2008195	5	0.0342449568227083	0.0909355827884496
2008195	6	0.0322803270435862	0.0899507208043032
2008195	7	0.0312211634082263	0.083349710093073
2008195	8	0.0310226384376616	0.0786752649933801
2008195	9	0.030683899890577	0.0727661900004559
2008195	10	0.0274683986447299	0.060677954479292
2008195	11	0.0231016263926484	0.0477008169957905
2008195	12	0.0187406572392345	0.0358341929047272
2008195	13	0.0148118762619961	0.0268433932525869
2008195	14	0.0123683085434983	0.0218641785031637
2008195	15	0.0105370086049376	0.0179790709499476
2008195	16	0.00922002174340241	0.0146139478898133
2008195	17	0.00900136784632694	0.0140006508128231
2008195	18	0.00822905098203489	0.0141873872127426
2008195	19	0.00752787324291205	0.0149207283403181
2008195	20	0.00717840229534246	0.0155104994073554
2008195	21	0.00689256828910319	0.0158879753264989
2008195	22	0.00659156858082761	0.0155529142476515
2008195	23	0.00699482419401429	0.0160813283410252
2008196	0	0.0081495042311388	0.0185887493127332
2008196	1	0.00946361283242128	0.0207782909979815
2008196	2	0.0101879284320544	0.0215178898418533
2008196	3	0.0124359751747173	0.0265349910832862
2008196	4	0.0170398794035785	0.0412277084842918
2008196	5	0.0402153445407955	0.125769661917509
2008196	6	0.112211903204514	0.34633518044739
2008196	7	0.173738050703928	0.479325217937343
2008196	8	0.211630696825866	0.533723159993451
2008196	9	0.195853117019288	0.440921838623066
2008196	10	0.173117311588723	0.353906882993654
2008196	11	0.156167927131507	0.287441755322573
2008196	12	0.145459424352978	0.249708058416743
2008196	13	0.130580010954545	0.216161521223062
2008196	14	0.101935108473609	0.165730603647974
2008196	15	0.0699405140939312	0.109794309282266
2008196	16	0.0432542662933089	0.0679504058318459
2008196	17	0.0336696972575537	0.0588139621897361
2008196	18	0.0307926309298496	0.0578446811996167
2008196	19	0.0284656638930838	0.0588425882813262
2008196	20	0.0265793309562101	0.0586355176028765
2008196	21	0.0261361570716353	0.0619977267989405
2008196	22	0.0268607049347516	0.0681348090192787
2008196	23	0.0246520737624775	0.0672782670214992
2008197	0	0.0253439203060469	0.0822205227486832
2008197	1	0.0512585527084544	0.178816682143603
2008197	2	0.0982771755994296	0.395625762572554
2008197	3	0.124143790703087	0.516167546339113
2008197	4	0.133091597981068	0.528617296605637
2008197	5	0.147603564287433	0.507933789971277
2008197	6	0.176050621343236	0.534703889943887
2008197	7	0.168142771859933	0.422815897982248
2008197	8	0.11095230495146	0.265821799487076
2008197	9	0.0934763380453511	0.21172975484773
2008197	10	0.0978147124247062	0.195912182065049
2008197	11	0.10079387666261	0.183979502593645
2008197	12	0.0960326383052668	0.167714033570703
2008197	13	0.081636148915209	0.140079981613358
2008197	14	0.0639590834923535	0.115993728296958
2008197	15	0.0512699358701575	0.0973567676585942
2008197	16	0.038490112371774	0.0773729835658828
2008197	17	0.0267636647403906	0.0615463403767258
2008197	18	0.0237836084983702	0.0574605833810316
2008197	19	0.0193937970743758	0.0515400880442962
2008197	20	0.0132666574962058	0.0373236890102742
2008197	21	0.0106251966324819	0.0322284370799905
2008197	22	0.0101531310794868	0.0320156665534135
2008197	23	0.0108616973953876	0.0347776453014649
2008198	0	0.00971828302989317	0.0311135965701419
2008198	1	0.00799661296838118	0.0274062216006289
2008198	2	0.0080207985148412	0.0305842548095648
2008198	3	0.00712505020934637	0.0328821569740976
2008198	4	0.0076026326541083	0.0351910596582778
2008198	5	0.00821969549973982	0.0389999879427466
2008198	6	0.0125450241286242	0.0425418067538927
2008198	7	0.0141889000790845	0.0376795534777445
2008198	8	0.0126378506624572	0.0292337486262683
2008198	9	0.00657971366789543	0.0180573263857514
2008198	10	0.00287430926042094	0.00871317733148401
2008198	11	0.00103234979529098	0.00310404305802088
2008198	12	0.00964892710261568	0.0228099134578616
2008198	13	0.104391413238637	0.191531410629707
2008198	14	0.129664510647772	0.208382291238034
2008198	15	0.105421148557529	0.178040632104207
2008198	16	0.0918817999206682	0.155356365666534
2008198	17	0.0864144979166401	0.145357059951564
2008198	18	0.0842790820656795	0.139466898071632
2008198	19	0.0861994534407537	0.140431360652069
2008198	20	0.104951248774407	0.174837500859204
2008198	21	0.136392542128222	0.270029997984788
2008198	22	0.18631570543984	0.380884405828322
2008198	23	0.209711373253398	0.43035365951558
2008199	0	0.205517769107012	0.480269742746032
2008199	1	0.199685762636732	0.536004108460009
2008199	2	0.197719802588234	0.588266832664097
2008199	3	0.214523110627544	0.631831553578659
2008199	4	0.206723444021361	0.585481754320703
2008199	5	0.218408685085452	0.584253272493746
2008199	6	0.229639405435457	0.608706229413145
2008199	7	0.299108691074449	0.722537255458975
2008199	8	0.325579905452097	0.693003660985688
2008199	9	0.301051903008026	0.616932471779211
2008199	10	0.212567196133972	0.458083059530673
2008199	11	0.158656536891057	0.354959434187411
2008199	12	0.125676369725389	0.269779748733392
2008199	13	0.101610496466227	0.21514010788076
2008199	14	0.0705841770378198	0.143472724371092
2008199	15	0.0482475815623317	0.10462328829484
2008199	16	0.0448036673105482	0.0958317218091968
2008199	17	0.0464498884531099	0.0976075373680444
2008199	18	0.0436849541904651	0.0890994716985063
2008199	19	0.0295252504995711	0.0627343360716002
2008199	20	0.0158425716063503	0.0335671606804155
2008199	21	0.0102111650386668	0.0205165643221912
2008199	22	0.00778285212565841	0.0180381206968199
2008199	23	0.0111684379822316	0.027344420989116
2008200	0	0.023727038381168	0.0587345691552239
2008200	1	0.0419582611497019	0.118265018591666
2008200	2	0.0638601752423244	0.189334560830052
2008200	3	0.0696494496202956	0.224879329368723
2008200	4	0.0706297498663575	0.215890614710951
2008200	5	0.0711752076619076	0.188510056756566
2008200	6	0.0379222742758242	0.107422863294476
2008200	7	0.0120087505999775	0.0330435934749409
2008200	8	0.0112810529335596	0.0291473461541394
2008200	9	0.0106348037035987	0.0281706856568616
2008200	10	0.0101764218177175	0.0241211272883685
2008200	11	0.0110090797936272	0.0254951764713814
2008200	12	0.0122018211169202	0.0318423818340969
2008200	13	0.0152825468042867	0.0446070630287125
2008200	14	0.0261924993784074	0.0755961710664463
2008200	15	0.0423979723820662	0.113271192266044
2008200	16	0.0504006519192966	0.121930263323396
2008200	17	0.0466705543426104	0.106505213195419
2008200	18	0.0360917279657384	0.0840834367552803
2008200	19	0.0312947909763122	0.0852538540000648
2008200	20	0.0272370220571475	0.0935121955508403
2008200	21	0.0306175294946921	0.12574209229717
2008200	22	0.0293013655388151	0.135077276147898
2008200	23	0.0223159329676439	0.119555498963632
2008201	0	0.0160481943212316	0.094341802121953
2008201	1	0.0144819249475681	0.0978383670937508
2008201	2	0.0158079229956072	0.125606363484894
2008201	3	0.0196459477863174	0.155080431667661
2008201	4	0.0206187781749138	0.146149992025835
2008201	5	0.0200444457118267	0.0994271794020064
2008201	6	0.0234746306603732	0.0845282046192137
2008201	7	0.0279743572503695	0.0820119783346958
2008201	8	0.0293282990089122	0.073274190830603
2008201	9	0.0309143896869897	0.0774333030399814
2008201	10	0.0418313155285735	0.0941979234391132
2008201	11	0.0599150711410578	0.125371440299112
2008201	12	0.0337037302942694	0.0961026403909622
2008201	13	0.00930405728545154	0.0272007763718459
2008201	14	0.0205318726064272	0.0475113808172501
2008201	15	0.0532778715567305	0.127475802021924
2008201	16	0.0962349533284124	0.241332400128931
2008201	17	0.108047381766357	0.261190320907677
2008201	18	0.099533935857217	0.237104199375962
2008201	19	0.0841176646014635	0.196282703265047
2008201	20	0.0620570916008652	0.152988453611615
2008201	21	0.02623614339137	0.0816336862396444
2008201	22	0.0178367947013564	0.0662510355828076
2008201	23	0.0244328418300902	0.0978494683128452
2008202	0	0.0253010828517573	0.0953085406508606
2008202	1	0.0229800923246722	0.086286814910895
2008202	2	0.0191895037155371	0.0730618698035053
2008202	3	0.0127186100216747	0.0538806736939063
2008202	4	0.00981674154246943	0.0487689101454268
2008202	5	0.0254445854860585	0.135364388435623
2008202	6	0.0515820114762686	0.267204474911247
2008202	7	0.0769492211318004	0.367153440456091
2008202	8	0.0870019123698767	0.398213522096759
2008202	9	0.0798494425151134	0.330167733997667
2008202	10	0.061589099843436	0.224244247373903
2008202	11	0.0558960396353724	0.174943609043905
2008202	12	0.0588957451999072	0.170606787721592
2008202	13	0.0553098278888366	0.145174055522631
2008202	14	0.0468612957049163	0.116604757550615
2008202	15	0.0514870145496133	0.136012286408986
2008202	16	0.0486046854831893	0.135348354341034
2008202	17	0.0392314720408585	0.119112041842537
2008202	18	0.0591118308947917	0.20873447157176
2008202	19	0.0932609753143455	0.320742921954627
2008202	20	0.0972751052464572	0.325423658295737
2008202	21	0.0976741129038165	0.330671959443155
2008202	22	0.0982007949789847	0.348274021380867
2008202	23	0.115654050264023	0.420303029330505
2008203	0	0.119817824907288	0.44203313197289
2008203	1	0.129341078874344	0.484552757880101
2008203	2	0.128991232043587	0.474291456356677
2008203	3	0.136591381930401	0.523782433940744
2008203	4	0.157202758943539	0.626502939273386
2008203	5	0.169963104665583	0.663423708089171
2008203	6	0.151870531650519	0.614905284026692
2008203	7	0.063703869314849	0.264881791403466
2008203	8	0.00735104920930305	0.0324889645191248
2008203	9	0.00342104374316896	0.0227760737327823
2008203	10	0.0186844668697325	0.131409970512391
2008203	11	0.0319444072911348	0.213932193613748
2008203	12	0.0269238250867954	0.189198110960016
2008203	13	0.0170541932395935	0.12908021877512
2008203	14	0.0266105984420765	0.178056537357439
2008203	15	0.0392343313434628	0.213895453940485
2008203	16	0.0342446806648907	0.154849532304141
2008203	17	0.0310092255397249	0.113398712979681
2008203	18	0.026387645340971	0.0906763596950876
2008203	19	0.0143500812438094	0.0520271287642142
2008203	20	0.00905436767329513	0.0339189931386658
2008203	21	0.0118003447204769	0.0593798203905242
2008203	22	0.0192608790084484	0.124032129220099
2008203	23	0.0210564813513442	0.141380741433167
2008204	0	0.0240899642135047	0.149284790935569
2008204	1	0.0270730656356915	0.163670527208342
2008204	2	0.0303333472970723	0.176943960128554
2008204	3	0.0272761799021578	0.179936530685786
2008204	4	0.0287443944286019	0.180508976174023
2008204	5	0.0313938588186703	0.17232406039468
2008204	6	0.0310357688283621	0.145491571530009
2008204	7	0.0308660519824825	0.123986863374464
2008204	8	0.0291651460243127	0.104764418453552
2008204	9	0.028853524289121	0.0918987691262478
2008204	10	0.029958769631535	0.0841503287744295
2008204	11	0.0360598873734943	0.0774781386449351
2008204	12	0.0551084563006857	0.0965967849038443
2008204	13	0.12996841644118	0.228119804643795
2008204	14	0.233911015528589	0.385575767757784
2008204	15	0.307406049945496	0.528744996939046
2008204	16	0.387229334691985	0.710783190972902
2008204	17	0.433940591034357	0.857540412726802
2008204	18	0.430826185506434	0.923230388731266
2008204	19	0.371629380361125	0.927309702943489
2008204	20	0.307111326576277	0.903293513221175
2008204	21	0.257099528262937	0.881617366860341
2008204	22	0.211668065970988	0.863218495886816
2008204	23	0.180029004386	0.845902143068186
2008205	0	0.15554896779366	0.811571986882698
2008205	1	0.13986081526151	0.76534346097793
2008205	2	0.119634828430687	0.7359417845694
2008205	3	0.113131659863402	0.73985471640529
2008205	4	0.123677145862745	0.753941234822345
2008205	5	0.131514659203069	0.768280446426174
2008205	6	0.160000902647638	0.840766956501516
2008205	7	0.213712506060221	1.00609943772078
2008205	8	0.181086734973828	0.720195804955459
2008205	9	0.14681639325447	0.505302988051812
2008205	10	0.155516586380686	0.472255396235621
2008205	11	0.16195695368204	0.45087241870129
2008205	12	0.16097147738023	0.415916053036224
2008205	13	0.156707873674236	0.386250108726677
2008205	14	0.152483942783919	0.366082127170273
2008205	15	0.142173761569424	0.342568121899763
2008205	16	0.125501943633666	0.314978210800366
2008205	17	0.113342078865228	0.297911375171832
2008205	18	0.111715083586222	0.290678221261161
2008205	19	0.101870343830405	0.299464511776564
2008205	20	0.0986313617048484	0.340094961558141
2008205	21	0.0950875902577077	0.369512321036619
2008205	22	0.0800392552459545	0.379393226415361
2008205	23	0.0672130671163292	0.376246508170719
2008206	0	0.0522541503455536	0.359422560722091
2008206	1	0.0443347861495046	0.342586867750631
2008206	2	0.0436395560876458	0.331278133714444
2008206	3	0.0443794836222394	0.326614785695675
2008206	4	0.0461957448521128	0.330207906761116
2008206	5	0.057510991589507	0.359203710094248
2008206	6	0.111693582699915	0.406002331252651
2008206	7	0.127533905822499	0.342711608468147
2008206	8	0.112858141766922	0.244356278998879
2008206	9	0.0829021880838686	0.155044877289048
2008206	10	0.0568931413248768	0.0972936486751452
2008206	11	0.0385401204105221	0.0627841529063149
2008206	12	0.0249483945888803	0.0393942589680603
2008206	13	0.0156212491004157	0.0240398170355386
2008206	14	0.0123428094467004	0.0190812415332541
2008206	15	0.0127009285546189	0.0189121437712459
2008206	16	0.0134051077034095	0.020676942102584
2008206	17	0.0209110582472524	0.0321116478407608
2008206	18	0.0316378990763615	0.0565211269386933
2008206	19	0.0392430361486807	0.0761983358579791
2008206	20	0.0519661101867217	0.102513178139939
2008206	21	0.0691082249886476	0.139910639961614
2008206	22	0.0851397637631202	0.17057023988645
2008206	23	0.0997667772590576	0.191318155226323
2008207	0	0.0916765937465309	0.163024373530884
2008207	1	0.0678351368156752	0.114435919685462
2008207	2	0.0639041048603644	0.110914856798939
2008207	3	0.0675051907302654	0.126130674624329
2008207	4	0.0760141708658959	0.151556408975724
2008207	5	0.0922668875948492	0.185875558542838
2008207	6	0.108517098659012	0.215121637149006
2008207	7	0.113465808944899	0.217231331612664
2008207	8	0.0933736258758454	0.178112678843349
2008207	9	0.0799114833160631	0.152787784307553
2008207	10	0.0788879804288363	0.15875006507528
2008207	11	0.103399594617699	0.222537858763308
2008207	12	0.148374198576017	0.309356806806573
2008207	13	0.179311058411	0.332908981320617
2008207	14	0.166621086237426	0.275121453008514
2008207	15	0.10068433706569	0.173506933114366
2008207	16	0.0543692343892324	0.0906692246733296
2008207	17	0.0387871701397323	0.0602986249783663
2008207	18	0.0345862500578664	0.0523413174342525
2008207	19	0.0378515883823996	0.0553440736270026
2008207	20	0.0428632619971788	0.0627655833899949
2008207	21	0.0407076066163414	0.0597952434984565
2008207	22	0.0358733688203975	0.0498975990373765
2008207	23	0.0343759233605941	0.0491322867097879
2008208	0	0.0261725806065802	0.0366011212808178
2008208	1	0.0157039588418718	0.0208376918665377
2008208	2	0.0131398592431739	0.0176517866641681
2008208	3	0.0129174579842302	0.0174115505603625
2008208	4	0.0129208371058627	0.0177493671057194
2008208	5	0.0137375596773548	0.0199992586308729
2008208	6	0.0172791492611572	0.0275429924541139
2008208	7	0.0202058036592342	0.0345294326324781
2008208	8	0.0182419732109762	0.0314340975648316
2008208	9	0.0159921199709705	0.0263962485269511
2008208	10	0.0115068715815876	0.0180416982797551
2008208	11	0.00841843319923461	0.0123980167564857
2008208	12	0.0073188122830715	0.0104083020047232
2008208	13	0.00711371526012	0.00990318436676323
2008208	14	0.0072027266732181	0.00995582569709617
2008208	15	0.00737016807625968	0.0102144290881174
2008208	16	0.00751703615528424	0.0104419023960738
2008208	17	0.00778805253041581	0.0108116177840085
2008208	18	0.00902500089988745	0.0123566686396562
2008208	19	0.0150465384577751	0.0221468039973643
2008208	20	0.0208486953169586	0.0300781495149417
2008208	21	0.0232192726987887	0.0323819905921121
2008208	22	0.0197687878098851	0.0283451591713401
2008208	23	0.0123811754034194	0.0168685555830967
2008209	0	0.00729787499516584	0.00945592325656883
2008209	1	0.00646410364793147	0.00864575049791574
2008209	2	0.00762720807307275	0.0115998780088447
2008209	3	0.00928183478408321	0.0155065307294587
2008209	4	0.0108419160022237	0.0188686859196342
2008209	5	0.012791198550262	0.0225303878615104
2008209	6	0.0154624052764312	0.026756204508478
2008209	7	0.0180585476160807	0.0301910153776749
2008209	8	0.0190420933425882	0.0309326026859178
2008209	9	0.0176759353191338	0.0273615082222635
2008209	10	0.0158139005273043	0.023968360726007
2008209	11	0.0153743860781573	0.0229448715251081
2008209	12	0.0152568522617749	0.0223534482402765
2008209	13	0.0151075606520229	0.0220006527539897
2008209	14	0.0150517904199483	0.0215399281368572
2008209	15	0.0156056087700009	0.0219048029609766
2008209	16	0.0168063275253299	0.0238966555507262
2008209	17	0.0192664195175098	0.0273233604220669
2008209	18	0.019294235280742	0.0292410059855732
2008209	19	0.0168192238380568	0.0285836389589447
2008209	20	0.0132294142138687	0.0237625766435688
2008209	21	0.00860354863728178	0.0162415431906726
2008209	22	0.00538133365961445	0.00964881863402262
2008209	23	0.00305457859694721	0.00417858547393596
2008210	0	0.00255992773870157	0.00313196016119674
2008210	1	0.00250712087486152	0.00302405614284775
2008210	2	0.00295834045493621	0.00415461844503334
2008210	3	0.00360746489362205	0.00588719252267782
2008210	4	0.00490297376539049	0.00957684669820475
2008210	5	0.00853237021169621	0.0189884010528225
2008210	6	0.0133163485204982	0.0294441128235229
2008210	7	0.0162520434229114	0.0338892189466314
2008210	8	0.0164361028131545	0.031792525508264
2008210	9	0.014108686164642	0.0253177683831156
2008210	10	0.0123853730077905	0.0208240597602273
2008210	11	0.0120227307862954	0.0192665280419258
2008210	12	0.012215193834624	0.0190073661625283
2008210	13	0.0136690048181103	0.0211395820210129
2008210	14	0.0164503450659022	0.0254165663441162
2008210	15	0.0190855749603526	0.0298486601876548
2008210	16	0.0212292955436886	0.0337762037286996
2008210	17	0.0239788732505376	0.0381536751984302
2008210	18	0.0289717596515521	0.0461248720733758
2008210	19	0.032679066375765	0.0592160923495389
2008210	20	0.04060596875676	0.075855726374013
2008210	21	0.0379623086173338	0.0782996885565987
2008210	22	0.030224461798788	0.0716104657327692
2008210	23	0.0213521501784051	0.054241817042839
2008211	0	0.0157527577664551	0.0389224428925619
2008211	1	0.0121428491853929	0.0285888602318963
2008211	2	0.0101375672898448	0.0229142021907302
2008211	3	0.00930767040959073	0.0209941603490646
2008211	4	0.0087663082816889	0.0198084995422108
2008211	5	0.00833761123341708	0.018676957020638
2008211	6	0.00831337546382987	0.0180505897068637
2008211	7	0.00863094910861058	0.0176103083547025
2008211	8	0.00976975696312854	0.0188874021015969
2008211	9	0.0114059068861043	0.0207911667506505
2008211	10	0.0132409578967733	0.0240557969726165
2008211	11	0.0139537035958494	0.0246175389010492
2008211	12	0.0139152379113112	0.0237315789722059
2008211	13	0.0145975502882284	0.0243397719536268
2008211	14	0.0146366490091809	0.0236584960330767
2008211	15	0.0144892902693807	0.023161309043631
2008211	16	0.0139983593368214	0.0227579850907718
2008211	17	0.0131301475437624	0.0220722750828801
2008211	18	0.012350965794113	0.0211447114704771
2008211	19	0.0118821109037637	0.0206641437268037
2008211	20	0.0114571186433427	0.0205215469806988
2008211	21	0.00829108787344388	0.0152909488301481
2008211	22	0.00521197834707003	0.00841433369138177
2008211	23	0.00421084893747967	0.00606081858009567
2008212	0	0.00420272119775328	0.00619574096237523
2008212	1	0.00446572823208134	0.00728598587902658
2008212	2	0.0047668581802092	0.00849503401887433
2008212	3	0.00488825664695268	0.00926329599422896
2008212	4	0.00494449527283465	0.00978266255711759
2008212	5	0.00496127348686664	0.0100320217231708
2008212	6	0.00490292093817793	0.00978836255918197
2008212	7	0.00454348750315659	0.00877935995058729
2008212	8	0.00465128951496634	0.00901837071598703
2008212	9	0.00474799125621997	0.00919018800033172
2008212	10	0.00497083194497118	0.0096696852647002
2008212	11	0.00569673106396094	0.0111378583202591
2008212	12	0.00678900831585196	0.0131360670387213
2008212	13	0.00716953491520849	0.0144422388785655
2008212	14	0.0072338420221957	0.0151214089911701
2008212	15	0.00769715254057208	0.0163946080913134
2008212	16	0.00753250497518382	0.0160111077738497
2008212	17	0.00692248198643097	0.0147529602438477
2008212	18	0.0062340233931886	0.0134084556149651
2008212	19	0.00610980453158139	0.0126818430118017
2008212	20	0.00670386660625931	0.0129291857592498
2008212	21	0.00693820787382622	0.014435191774166
2008212	22	0.00760470258250243	0.0173142175846771
2008212	23	0.00740505718978605	0.0173377363281776
2008213	0	0.00715874315607005	0.0171654461850346
2008213	1	0.00643704837110046	0.0170887442624515
2008213	2	0.0058359945652663	0.0159683417394383
2008213	3	0.00519677229118509	0.0129170767404594
2008213	4	0.00384144262939518	0.00862494704879218
2008213	5	0.00293248540448863	0.00555738347838767
2008213	6	0.00254272302432769	0.00437877336230862
2008213	7	0.00248575640728727	0.00435961525531041
2008213	8	0.00275092924116856	0.00493028536102792
2008213	9	0.00315900205146365	0.00595104841852407
2008213	10	0.00526061095742946	0.0104572631739137
2008213	11	0.00640929774353454	0.0124602810128554
2008213	12	0.00630890909230923	0.0118308132910273
2008213	13	0.00584610878242199	0.0107458608639403
2008213	14	0.00529535728156914	0.00945855526111644
2008213	15	0.00491393161547822	0.00865030730979447
2008213	16	0.0044079062270445	0.00794813894385045
2008213	17	0.00347134462238841	0.00678042619365081
2008213	18	0.00290167110022364	0.00525770957695295
2008213	19	0.00247257056995625	0.00398283066786998
2008213	20	0.0023090921952156	0.00374104639205289
2008213	21	0.00244634026510723	0.0046349567525532
2008213	22	0.00232190522914198	0.00474903119720445
2008213	23	0.00191812704361696	0.00393841882479395
2008214	0	0.00138478810113969	0.00248967310997775
2008214	1	0.0010614837801774	0.00158387063300792
2008214	2	0.000973371588507269	0.00136858215873853
2008214	3	0.000957254569640429	0.00138508296001479
2008214	4	0.000975368541383912	0.00148464703533967
2008214	5	0.00102885659956249	0.0016606675012827
2008214	6	0.00110581361604099	0.00185460417424745
2008214	7	0.00146572380640971	0.00267118444005807
2008214	8	0.00185181889703629	0.00348812252951898
2008214	9	0.002535979761771	0.00502996268695559
2008214	10	0.00304358298095631	0.00656746030065836
2008214	11	0.004022317844277	0.00934816956859654
2008214	12	0.00393051962025009	0.00953733684831289
2008214	13	0.00326377112947405	0.00795619300900642
2008214	14	0.00301891627397797	0.00731051624906051
2008214	15	0.00309670523716824	0.00742486484956311
2008214	16	0.00390146684710109	0.00975115780229566
2008214	17	0.00455987826719384	0.0122607455687831
2008214	18	0.00533344318445939	0.014787572851026
2008214	19	0.00635608251885745	0.0188875494238831
2008214	20	0.00735004769150839	0.0224582609918955
2008214	21	0.00746840984876675	0.0230127759249782
2008214	22	0.00888568370368644	0.0258451272576453
2008214	23	0.00936698072799779	0.0251588283073881
2008215	0	0.0159515947374448	0.0435138681320738
2008215	1	0.0252897853633758	0.0630762164175829
2008215	2	0.0504473007494742	0.13371718291037
2008215	3	0.105179609394202	0.305737336707143
2008215	4	0.158772017254857	0.482997699523026
2008215	5	0.184413537178178	0.577041288349823
2008215	6	0.217720588114792	0.653979654544281
2008215	7	0.24826464096636	0.681851982273901
2008215	8	0.249086778608201	0.609565956387094
2008215	9	0.231830965374768	0.535035465702273
2008215	10	0.225604803569031	0.493752403086471
2008215	11	0.212368999159597	0.448836319908088
2008215	12	0.201909456874681	0.417145639607368
2008215	13	0.210730686558428	0.432623156828018
2008215	14	0.22809071374791	0.441278959573899
2008215	15	0.218711328968465	0.411302693021647
2008215	16	0.207473214540832	0.398848374841868
2008215	17	0.205432242773017	0.399454991315065
2008215	18	0.201097776703423	0.396306188473338
2008215	19	0.200166563054697	0.404134359208802
2008215	20	0.208712182618758	0.43513119153501
2008215	21	0.218262449572707	0.462213051443851
2008215	22	0.211186530857665	0.461916702897756
2008215	23	0.19415833555381	0.43972974845984
2008216	0	0.174342646751549	0.411793555098451
2008216	1	0.1594037427565	0.394156172389724
2008216	2	0.144155390989694	0.37435799708548
2008216	3	0.122336830845059	0.342384959574973
2008216	4	0.102957269597393	0.314859911621349
2008216	5	0.0846290198466457	0.294281812309126
2008216	6	0.0903464950682087	0.276608420748203
2008216	7	0.106096005544675	0.285174475267728
2008216	8	0.173715203246291	0.439645533045177
2008216	9	0.216399554748599	0.557102302923086
2008216	10	0.185130769491502	0.451520259505866
2008216	11	0.18753737359222	0.418499098889129
2008216	12	0.129128744485728	0.279186716608091
2008216	13	0.0878137794864319	0.184886634628846
2008216	14	0.0702636493096048	0.149613658253419
2008216	15	0.0596872716621242	0.127439772927149
2008216	16	0.0510783297062184	0.10928395904293
2008216	17	0.0548000255439145	0.109540474093886
2008216	18	0.0626734694705847	0.120501653399596
2008216	19	0.0482831079754227	0.103538854191072
2008216	20	0.0312815817231643	0.0773608628725072
2008216	21	0.019745607849427	0.0608343025984549
2008216	22	0.00298688061310862	0.0158581819263332
2008216	23	0.000128465901710101	0.00075795866411586
2008217	0	2.33778258059421e-05	0.000145795941096278
2008217	1	2.92447526636568e-05	0.000174648403077844
2008217	2	6.19842837435347e-05	0.000354512744375231
2008217	3	0.000577495989008251	0.00335924995844682
2008217	4	0.00372199849582838	0.0209865322758424
2008217	5	0.00985225818257077	0.0456366118856168
2008217	6	0.0162122405506564	0.0622447211581137
2008217	7	0.019405562165652	0.0639058123507939
2008217	8	0.0217222985893192	0.0666773058829146
2008217	9	0.0305072730432618	0.0891888983886389
2008217	10	0.0320065661203843	0.097922786700018
2008217	11	0.0235590509419997	0.0726278773702512
2008217	12	0.011078304701827	0.0336218293220456
2008217	13	0.00950484084749712	0.0265658501767531
2008217	14	0.0209653232695651	0.0545857397932942
2008217	15	0.0222169194812333	0.0569589421538865
2008217	16	0.0350256520589766	0.090432630875637
2008217	17	0.0245606627387555	0.0803395048788251
2008217	18	0.0198125734252977	0.0673129592680446
2008217	19	0.0297459283797203	0.0749751220360104
2008217	20	0.0381088438440919	0.0851534650063085
2008217	21	0.0482613151527869	0.116514028108815
2008217	22	0.0394810854403482	0.113541138035314
2008217	23	0.0267684523944393	0.0854230976242769
2008218	0	0.0240195117267418	0.0822754282906281
2008218	1	0.0318764194029871	0.120146870945472
2008218	2	0.040649510741631	0.165804797601155
2008218	3	0.0495640594354641	0.199456972540106
2008218	4	0.0569617646117721	0.218539324390329
2008218	5	0.0757488990843513	0.25721146817038
2008218	6	0.104010225259581	0.322097452757642
2008218	7	0.115083259289908	0.346183647839217
2008218	8	0.113579744304023	0.326862956328792
2008218	9	0.112121254203095	0.29769038996279
2008218	10	0.108798727596728	0.267042453718726
2008218	11	0.11124022010685	0.253683044728376
2008218	12	0.123587598919616	0.25388865682283
2008218	13	0.128949325485866	0.246345767900947
2008218	14	0.126984471017808	0.238831624127222
2008218	15	0.135361540945629	0.236860781615448
2008218	16	0.15026809814064	0.233554694031506
2008218	17	0.129798067621605	0.219008748935655
2008218	18	0.0904320829279784	0.181896343563009
2008218	19	0.0582777878026319	0.136834899937233
2008218	20	0.0358888000659504	0.0978986880016186
2008218	21	0.0249246911771205	0.0707151025490619
2008218	22	0.0201395880936389	0.0588585655620885
2008218	23	0.0167337627477269	0.0526430688502333
2008219	0	0.0145483258787784	0.0487027409939239
2008219	1	0.0128228294091358	0.0451462469120136
2008219	2	0.0115360805698852	0.0412444971959322
2008219	3	0.00999917993477964	0.0369358148035188
2008219	4	0.00877179436269729	0.0336610616919938
2008219	5	0.00767513287197127	0.0292942133526065
2008219	6	0.00791594266371862	0.027273515942801
2008219	7	0.00920856712868807	0.0288839441334545
2008219	8	0.0111696369695747	0.0329182147472918
2008219	9	0.0132134383513241	0.0376677309652299
2008219	10	0.0141306194310477	0.0397233527179041
2008219	11	0.0175843721192662	0.0523544745973149
2008219	12	0.0223925332966851	0.0741050697081207
2008219	13	0.0242491873322739	0.0873181683403857
2008219	14	0.0272856152168724	0.09653981262818
2008219	15	0.0343031061823858	0.117046018897448
2008219	16	0.0426054231186055	0.140390188095697
2008219	17	0.0501352233017617	0.160618510310342
2008219	18	0.0530231409001399	0.168600696234898
2008219	19	0.0543514444598922	0.170337499253317
2008219	20	0.0548244877165669	0.169915648851178
2008219	21	0.0535589776491341	0.169338125668296
2008219	22	0.0518885007552685	0.167108859109865
2008219	23	0.0492254445743702	0.162115257661775
2008220	0	0.0456069679471767	0.157078470782052
2008220	1	0.0431398475593587	0.153912181056269
2008220	2	0.0415183370073993	0.152034553291536
2008220	3	0.0398086647576072	0.148657833756877
2008220	4	0.0379412281487952	0.144049148356038
2008220	5	0.0400480018334293	0.138930335912683
2008220	6	0.0421058510611779	0.138134252552575
2008220	7	0.0445721177532438	0.131450333903503
2008220	8	0.0416348684172461	0.111255955413583
2008220	9	0.0367941079873456	0.0899079646460819
2008220	10	0.0290873441143681	0.0684419778898224
2008220	11	0.0234169415210022	0.0534996161103445
2008220	12	0.0208917212544744	0.0451534395281495
2008220	13	0.0194836242808768	0.0404322163746149
2008220	14	0.0188525372073041	0.0369410187529601
2008220	15	0.0183327988431788	0.0352014916080445
2008220	16	0.0173016736230357	0.0350062711133623
2008220	17	0.0141557112717123	0.0321448842241549
2008220	18	0.00857734413769483	0.0210087756974369
2008220	19	0.00597282377405508	0.0151024604034676
2008220	20	0.00500180892594929	0.0128739777408947
2008220	21	0.00385803891147323	0.0114490230248291
2008220	22	0.00319317360338707	0.012136255753499
2008220	23	0.00329542247163361	0.0122321873133553
2008221	0	0.00237319500557768	0.00782901591974434
2008221	1	0.0013543028440569	0.004573027148358
2008221	2	0.00368327929114795	0.0234289439118096
2008221	3	0.0145820539934736	0.0640757552249661
2008221	4	0.0249354232760034	0.0786604735170061
2008221	5	0.0380301362917502	0.103747788105608
2008221	6	0.0751855316291592	0.200084711343113
2008221	7	0.113767050962871	0.287290234282831
2008221	8	0.139632073338027	0.315310717572324
2008221	9	0.145091713375172	0.300381155887031
2008221	10	0.125740318388432	0.246571130755903
2008221	11	0.0836627011115294	0.167456856587171
2008221	12	0.0463144841687571	0.0903525805919267
2008221	13	0.0358519311542484	0.0709444198821133
2008221	14	0.0601185046182971	0.130146971918502
2008221	15	0.0947327817371381	0.214672193157034
2008221	16	0.0563842698887965	0.190217857262583
2008221	17	0.102320881438316	0.325879326588646
2008221	18	0.152218238854799	0.564445062037255
2008221	19	0.0847326098691154	0.419365866380199
2008221	20	0.119205452447245	0.620224661119841
2008221	21	0.259111243169742	1.27885764777362
2008221	22	0.363531310737921	1.7215965680355
2008221	23	0.373216031844672	1.75601045072095
2008222	0	0.383003364358448	1.75710068866643
2008222	1	0.412538410457631	1.80874537783371
2008222	2	0.417535516660308	1.77621135454409
2008222	3	0.419965700501004	1.7257234009825
2008222	4	0.434962865470167	1.69403061099844
2008222	5	0.45964573315681	1.61658067263856
2008222	6	0.462655742963199	1.43162930786121
2008222	7	0.425079320162226	1.22697704600119
2008222	8	0.380981144876182	1.12800060695469
2008222	9	0.336530372352741	1.03629070580127
2008222	10	0.291528529807092	0.90839657141673
2008222	11	0.264066333970676	0.793787244534956
2008222	12	0.241857440977158	0.654769296660799
2008222	13	0.294036338893358	0.556572397159131
2008222	14	0.307607050730571	0.581917998102036
2008222	15	0.305878590724076	0.559788757175691
2008222	16	0.269621761107159	0.496409704168993
2008222	17	0.232345164608826	0.455244552136751
2008222	18	0.21456120646694	0.444817277799592
2008222	19	0.20105036145323	0.46346438658862
2008222	20	0.185061454143985	0.474120449751735
2008222	21	0.179778977027958	0.437939276853984
2008222	22	0.128437809223268	0.332562324258623
2008222	23	0.0904427472827581	0.228767228226087
2008223	0	0.0606953626494182	0.144176221406739
2008223	1	0.0454074177005517	0.101758663180498
2008223	2	0.0483980602515561	0.103481268017093
2008223	3	0.0774440505915701	0.152235066725341
2008223	4	0.101156757787608	0.194982968644622
2008223	5	0.100052710283304	0.197907998365295
2008223	6	0.0792493634355717	0.160705038938201
2008223	7	0.0714098615427219	0.143149196257363
2008223	8	0.0771905826146552	0.148489029627847
2008223	9	0.0890410905085303	0.163220070241354
2008223	10	0.0880398316113163	0.159080684626171
2008223	11	0.0813551911189029	0.142329668037242
2008223	12	0.0800429330049669	0.128254130174481
2008223	13	0.0642542862591069	0.0942048214003332
2008223	14	0.0444897130368961	0.065735817491541
2008223	15	0.0327266486440198	0.0496892221412009
2008223	16	0.02744458465216	0.0441181521524131
2008223	17	0.0226510070067541	0.0407823263898255
2008223	18	0.0210512367813214	0.0434518812931983
2008223	19	0.0213068710995216	0.0498893674332693
2008223	20	0.0230383567129809	0.0605595413557767
2008223	21	0.0204866587211336	0.0838406010916443
2008223	22	0.0433365063771651	0.260421438993614
2008223	23	0.0539832141545953	0.34944739386316
2008224	0	0.0506789892334025	0.34915825631811
2008224	1	0.0575379146914287	0.29258970218565
2008224	2	0.04966332857785	0.247613249209599
2008224	3	0.0438167983101642	0.215395369149765
2008224	4	0.0394046987520103	0.212914578292351
2008224	5	0.059453611330947	0.24359913765844
2008224	6	0.0838776064142536	0.282147417136458
2008224	7	0.13296355032672	0.3706107899343
2008224	8	0.208902439229034	0.548070737073769
2008224	9	0.238284835021635	0.59738306206292
2008224	10	0.234077511628496	0.535804908990084
2008224	11	0.225446413377845	0.477497919164077
2008224	12	0.210846544675229	0.423993756986497
2008224	13	0.186733989550778	0.371522396071639
2008224	14	0.17495415762934	0.329960255606464
2008224	15	0.169350183916046	0.31558461564067
2008224	16	0.169716268652703	0.331861604449418
2008224	17	0.167134792222968	0.35870349419409
2008224	18	0.169238683369829	0.388178599780509
2008224	19	0.169302195403885	0.396366390369977
2008224	20	0.167734375634688	0.394878093966755
2008224	21	0.162388142750565	0.392438519396305
2008224	22	0.157188566469681	0.390744885717022
2008224	23	0.149055847792996	0.383463879560792
2008225	0	0.127900011843113	0.347126113314068
2008225	1	0.0981499807080866	0.308096234776637
2008225	2	0.069996819354732	0.26300523149438
2008225	3	0.0493442057613245	0.225659110614068
2008225	4	0.0368745388872103	0.200614262300897
2008225	5	0.0306577466243375	0.158875468395739
2008225	6	0.0184462059330062	0.0808182081140793
2008225	7	0.0138308183984968	0.0435446696942803
2008225	8	0.0124003330735359	0.0318093230827891
2008225	9	0.0108143080059866	0.0234755357906368
2008225	10	0.0104757408692163	0.0210410908711621
2008225	11	0.010300594955193	0.0204014694258259
2008225	12	0.00805230113026656	0.0157111531565666
2008225	13	0.00751746226619548	0.0198771423292898
2008225	14	0.00258225167830236	0.00938595470515526
2008225	15	0.00118991976044016	0.00461524219838813
2008225	16	0.0014658080346326	0.00544232393586946
2008225	17	0.00679922982192882	0.0267802064258184
2008225	18	0.0251012487405124	0.0846595176765581
2008225	19	0.0272957693812813	0.0828416272874235
2008225	20	0.0176232505992601	0.0509981936566664
2008225	21	0.0139075779271046	0.0372955166507566
2008225	22	0.0130266448560475	0.0273936451427903
2008225	23	0.0131872651173239	0.0207646100116985
2008226	0	0.0146970011814682	0.0192361718967436
2008226	1	0.0177064784448188	0.022170907708759
2008226	2	0.0274212742314863	0.0356190487879805
2008226	3	0.0376224180509865	0.0517765420128819
2008226	4	0.0356850299030799	0.056888350914242
2008226	5	0.0286840264211734	0.0662661497758479
2008226	6	0.0345436456270853	0.110284533683379
2008226	7	0.0652233136350114	0.217139637828022
2008226	8	0.103207137769233	0.289785608607024
2008226	9	0.106893324730146	0.244764027437275
2008226	10	0.0946161833827357	0.19571608967932
2008226	11	0.0849627674004047	0.180650218302571
2008226	12	0.0898754246267349	0.20781136859873
2008226	13	0.0896097509198584	0.229563898625886
2008226	14	0.084586742555259	0.210328483421797
2008226	15	0.075939111433709	0.189838581148268
2008226	16	0.0761122564255154	0.192124770107994
2008226	17	0.0706475212283054	0.168541420369691
2008226	18	0.0626885971736231	0.150395825250367
2008226	19	0.0711792204734869	0.178144095468917
2008226	20	0.0894246101950025	0.211371805255695
2008226	21	0.0910782885610773	0.200718175099221
2008226	22	0.0906090467058463	0.191895060322098
2008226	23	0.0881372571167614	0.181244061991168
2008227	0	0.0953052866397523	0.195237928434803
2008227	1	0.10548164375652	0.218830614881572
2008227	2	0.0899212808940404	0.196641911545629
2008227	3	0.0932082046407792	0.235048904249796
2008227	4	0.113400357486003	0.323493375095287
2008227	5	0.133390019457194	0.406991228527329
2008227	6	0.153911818792099	0.465197461118395
2008227	7	0.169071742878788	0.467353673227275
2008227	8	0.145841087479093	0.388120752458056
2008227	9	0.149998186335297	0.452734332316237
2008227	10	0.163113062159671	0.519274532982615
2008227	11	0.156616203515151	0.465622945011316
2008227	12	0.143425415965855	0.395743626195081
2008227	13	0.128593178551988	0.348602322226677
2008227	14	0.138499422388358	0.388538380189
2008227	15	0.13775334854728	0.373820840653017
2008227	16	0.121479228997266	0.308672897920445
2008227	17	0.110920437718254	0.25293610694429
2008227	18	0.115562979241653	0.20771234659153
2008227	19	0.113290514206734	0.201009474826522
2008227	20	0.128226969372104	0.242674752617775
2008227	21	0.140126281696923	0.283034818431978
2008227	22	0.138813726464966	0.304635350067788
2008227	23	0.13077079849555	0.310439415080349
2008228	0	0.124955573577371	0.307650475082785
2008228	1	0.119931845157542	0.301892678958652
2008228	2	0.116100912370657	0.290803725583854
2008228	3	0.11351269194727	0.277639481488671
2008228	4	0.106816419656412	0.264043279212137
2008228	5	0.100641749019042	0.246213997718761
2008228	6	0.0983885029922638	0.245528273204917
2008228	7	0.109342664835783	0.265162196486331
2008228	8	0.129180258304341	0.305790340037431
2008228	9	0.143545248601036	0.359450905032444
2008228	10	0.151982265824472	0.386546038720019
2008228	11	0.1486567399699	0.378381596163591
2008228	12	0.145806414399743	0.360284776327432
2008228	13	0.142060782341612	0.341086942221586
2008228	14	0.13961820177187	0.329682823324631
2008228	15	0.136380810656998	0.324120612340405
2008228	16	0.132776998249659	0.320027334618449
2008228	17	0.129456238313914	0.320990928998092
2008228	18	0.129783114383808	0.333303946925722
2008228	19	0.128114159796282	0.341317962412989
2008228	20	0.127618534898254	0.349524579581574
2008228	21	0.129898622517503	0.359394312249573
2008228	22	0.130407553432436	0.374621984561095
2008228	23	0.126781511244641	0.384038927271356
2008229	0	0.121366297756711	0.391039992800849
2008229	1	0.115497169895603	0.394137043528116
2008229	2	0.109105655397441	0.396037515824504
2008229	3	0.101302124139737	0.398600425290285
2008229	4	0.10065988989769	0.399970169352382
2008229	5	0.0837655793404273	0.396239883996234
2008229	6	0.0977707871037891	0.43560825780735
2008229	7	0.124471438144043	0.454259310137297
2008229	8	0.151083986022371	0.469224162318051
2008229	9	0.151579150733437	0.418598600968659
2008229	10	0.148752158759603	0.373600798465112
2008229	11	0.141888594430087	0.334444825308652
2008229	12	0.134194893106136	0.304826924810141
2008229	13	0.129826169070747	0.285984277811681
2008229	14	0.124715211788939	0.271905573654618
2008229	15	0.120275398173913	0.258138267329981
2008229	16	0.119983480962835	0.251458024469913
2008229	17	0.127527049256418	0.266766357285484
2008229	18	0.142396628689198	0.318117253303538
2008229	19	0.153755961687964	0.332566446181076
2008229	20	0.142703465025049	0.304744859231538
2008229	21	0.114633196180393	0.256180513809493
2008229	22	0.0913484921125804	0.213289384979765
2008229	23	0.0755519248145514	0.184271433315902
2008230	0	0.0627781415947152	0.164754757721163
2008230	1	0.0537397113019342	0.151397205211891
2008230	2	0.0444992773545103	0.14271889450718
2008230	3	0.0374356399659659	0.136493403865404
2008230	4	0.0327293574265887	0.131551241143208
2008230	5	0.0320674914630328	0.129432794138443
2008230	6	0.0393633380884014	0.133870989802683
2008230	7	0.0558500664789554	0.148478655544068
2008230	8	0.063337145177961	0.162085357216891
2008230	9	0.0743243261873	0.18531515362701
2008230	10	0.0734920434542081	0.178436770123308
2008230	11	0.0734289427056147	0.17054041327072
2008230	12	0.0734613621087535	0.165366161311271
2008230	13	0.0738621851686139	0.160406231609786
2008230	14	0.0717136518216298	0.153727694576757
2008230	15	0.0699832301464844	0.146430791970181
2008230	16	0.0665972557167563	0.141000638217683
2008230	17	0.0622851670953868	0.138561117423666
2008230	18	0.0575691763134067	0.137540142395051
2008230	19	0.0504437421731908	0.135817405066506
2008230	20	0.0453966211631945	0.13073138914176
2008230	21	0.0416378587426402	0.124695460112391
2008230	22	0.0383677498801994	0.118916567674072
2008230	23	0.0351886530235793	0.112931596381851
2008231	0	0.0313244193927795	0.106445897340007
2008231	1	0.029916235487856	0.101640916229694
2008231	2	0.0338747151089424	0.116781446001468
2008231	3	0.0317806404804751	0.116526177518812
2008231	4	0.0363998220489422	0.125927474703458
2008231	5	0.0371292250464913	0.11638055056597
2008231	6	0.0330634069518405	0.104588477671926
2008231	7	0.0444220426817541	0.1414538520161
2008231	8	0.0667363293505306	0.207256724044615
2008231	9	0.0819018422418299	0.209444153961521
2008231	10	0.093953256137981	0.196910376857869
2008231	11	0.106122209586088	0.191816781795995
2008231	12	0.104995821044125	0.192290415803942
2008231	13	0.112172877301932	0.209706768379733
2008231	14	0.112080667496842	0.216949902410719
2008231	15	0.113145311648091	0.224247000929148
2008231	16	0.113572234126867	0.231539313698321
2008231	17	0.116128927034493	0.239162169857759
2008231	18	0.113125863187124	0.240336618418851
2008231	19	0.108714363506784	0.237132234978231
2008231	20	0.11292671216266	0.224040838256571
2008231	21	0.0860036330479455	0.164352983845438
2008231	22	0.0625879395779596	0.112523258358787
2008231	23	0.0549624520229097	0.098584894760655
2008232	0	0.0512658902434127	0.0924316673843435
2008232	1	0.0489246622618608	0.0881032866289931
2008232	2	0.0485251875631779	0.08713342468192
2008232	3	0.050099580117977	0.0895930394870279
2008232	4	0.0528835831674493	0.0952735035636036
2008232	5	0.0610702027221783	0.113973734783574
2008232	6	0.0764696941455557	0.151254463763063
2008232	7	0.0858466634687419	0.168970307671334
2008232	8	0.0939017253198623	0.190747946852691
2008232	9	0.112847919039496	0.236401223954223
2008232	10	0.106780945697441	0.190521639069788
2008232	11	0.0979429717247828	0.163423149061712
2008232	12	0.090796635663636	0.145539846554234
2008232	13	0.0898114207621858	0.137199862609941
2008232	14	0.0820680387048983	0.144678652780746
2008232	15	0.0904745900490325	0.171797248564312
2008232	16	0.098443692382319	0.181358896886477
2008232	17	0.0949397318479414	0.173703374023932
2008232	18	0.105767028997419	0.175586755409153
2008232	19	0.127992897195063	0.228785964517283
2008232	20	0.183862974147019	0.343876638330802
2008232	21	0.264040346133432	0.462823150104623
2008232	22	0.360716844753089	0.621764679439756
2008232	23	0.375181101769478	0.679773072865203
2008233	0	0.277370307199819	0.591200323783756
2008233	1	0.236403414298128	0.502259530088209
2008233	2	0.284808641938832	0.567121932141269
2008233	3	0.4034098759827	0.790245001174144
2008233	4	0.424324851325134	0.819738231691429
2008233	5	0.339833808470359	0.684106847974612
2008233	6	0.337431817928033	0.772306221722988
2008233	7	0.361389014125425	0.926839147884819
2008233	8	0.337942035187638	0.847204633848433
2008233	9	0.294976842711917	0.71003266717067
2008233	10	0.200344869025623	0.495157853464112
2008233	11	0.121220719756234	0.295085122426293
2008233	12	0.0989413351179861	0.239211157129045
2008233	13	0.101073724760777	0.222601541118184
2008233	14	0.109628108532728	0.215927438643078
2008233	15	0.110983705546424	0.206247392353146
2008233	16	0.10775311403607	0.201843100256485
2008233	17	0.0965127419908452	0.191783053383532
2008233	18	0.060967964802672	0.136681451637799
2008233	19	0.0186360055746026	0.0377888648189495
2008233	20	0.0191506964203838	0.0389194571374023
2008233	21	0.0376663351783722	0.0810003411996217
2008233	22	0.086318424923977	0.218207978322081
2008233	23	0.135992928459588	0.352321486131219
2008234	0	0.166271556581324	0.434760065078688
2008234	1	0.15920040709009	0.432694317151916
2008234	2	0.153206749293768	0.428163110500761
2008234	3	0.171787566740971	0.485871499872016
2008234	4	0.201884805483165	0.565583864901784
2008234	5	0.239121600765632	0.662942876657217
2008234	6	0.334544857527328	0.80633835614907
2008234	7	0.396948165901617	0.851304026230605
2008234	8	0.449252014541826	0.885336526222241
2008234	9	0.489046336616143	0.909091785132282
2008234	10	0.50144500719034	0.890326061086899
2008234	11	0.494647652298192	0.858487730653846
2008234	12	0.49426024692949	0.836335926235944
2008234	13	0.489375769906277	0.814885090268705
2008234	14	0.464590979356844	0.759956559850869
2008234	15	0.426672768492481	0.690697082081408
2008234	16	0.377076842733205	0.584925034976106
2008234	17	0.247852289594234	0.429635894900446
2008234	18	0.162501939004201	0.299686895971949
2008234	19	0.13317348095778	0.272959160866711
2008234	20	0.113084070453985	0.259578693421759
2008234	21	0.0603521676086443	0.181723407221155
2008234	22	0.044045891807388	0.146468841694219
2008234	23	0.0450677261414281	0.157119851670099
2008235	0	0.0457956861083811	0.153335687113388
2008235	1	0.0420147555659926	0.146319397548703
2008235	2	0.0445979860989088	0.173561411742435
2008235	3	0.0489356279987527	0.22776366412124
2008235	4	0.0488222664254549	0.238160387703129
2008235	5	0.0479263874332707	0.223096811298918
2008235	6	0.0535247987796203	0.226854576274217
2008235	7	0.0622699997929285	0.229420157446435
2008235	8	0.0744446429669252	0.233957448000652
2008235	9	0.0990704447790377	0.301675591906545
2008235	10	0.149596175317454	0.442790482481262
2008235	11	0.17026880445001	0.478587602892399
2008235	12	0.128546111415641	0.34433662769754
2008235	13	0.0669687523657483	0.170320540111396
2008235	14	0.0234363782912448	0.064916383281971
2008235	15	0.0138062246140978	0.0400615556022629
2008235	16	0.011722405282666	0.0376494562306618
2008235	17	0.0111340321623841	0.0395508711118027
2008235	18	0.0116175586267795	0.0471082143579467
2008235	19	0.0126233120490041	0.0602444111587356
2008235	20	0.0146370329959046	0.0743346950258104
2008235	21	0.015324002776276	0.0791731825902397
2008235	22	0.0142543386113191	0.0706206625286065
2008235	23	0.0124445961100924	0.0581408720472105
2008236	0	0.0244227285471662	0.0733950797860296
2008236	1	0.0637619237047414	0.189094379291428
2008236	2	0.0930323555656274	0.295438557198683
2008236	3	0.0927480269791823	0.322538570218191
2008236	4	0.0761946262174106	0.324858817563401
2008236	5	0.0709154200152652	0.328315822929298
2008236	6	0.0830542013340922	0.315348827083529
2008236	7	0.0857909459345523	0.258998284141531
2008236	8	0.0553020624137044	0.154590628110362
2008236	9	0.0251710837259581	0.0957094362475371
2008236	10	0.0299946901300539	0.111693122948242
2008236	11	0.0236363009251672	0.0906411759058784
2008236	12	0.017868038910077	0.0713157974719319
2008236	13	0.0232851500771124	0.0828421432736429
2008236	14	0.030832282553879	0.104594978431215
2008236	15	0.0341593491449603	0.109153749818497
2008236	16	0.0173500645495122	0.0756678905693225
2008236	17	0.015224324545817	0.0549507967063459
2008236	18	0.0197169516650385	0.069450445979743
2008236	19	0.00550566331733806	0.0275036735348615
2008236	20	0.00287309714877291	0.0116239777009569
2008236	21	0.0106813142991886	0.0411907469993281
2008236	22	0.0273970492336553	0.0934303310265403
2008236	23	0.0351115754452375	0.122443525595222
2008237	0	0.035608513590258	0.141810775183255
2008237	1	0.0314343615431318	0.151538186320791
2008237	2	0.0251095955634719	0.14219401041419
2008237	3	0.0194939549361948	0.131373522327408
2008237	4	0.0210996256411729	0.140426458200495
2008237	5	0.0317272710490464	0.162433517337374
2008237	6	0.0431560573750016	0.183204095803406
2008237	7	0.0562211732692228	0.191892808195342
2008237	8	0.074651259548277	0.219726341857534
2008237	9	0.0885437842693118	0.244403508225715
2008237	10	0.082955998921428	0.226552445383086
2008237	11	0.0816488630634434	0.196914443027806
2008237	12	0.0752454302722285	0.166460835605253
2008237	13	0.0673969071962176	0.140967498838752
2008237	14	0.0567661013216623	0.116308217711464
2008237	15	0.0469890947361283	0.0971616096689888
2008237	16	0.0419967135041011	0.0892457042598931
2008237	17	0.0375789091338494	0.0858154741737114
2008237	18	0.0348298970583007	0.0856941659881126
2008237	19	0.0327819804175183	0.0872652063997607
2008237	20	0.0302263505952426	0.087163535596841
2008237	21	0.0276892390632558	0.0855896032327498
2008237	22	0.0283422302771134	0.0850714785611704
2008237	23	0.0314914425140924	0.092675106215613
2008238	0	0.041418335876994	0.125115320394234
2008238	1	0.0511616347049875	0.173061797461729
2008238	2	0.05992156549462	0.228023372430841
2008238	3	0.0649058539873179	0.258055340944785
2008238	4	0.0616475964516662	0.251398679341125
2008238	5	0.0568207157891797	0.238514711367805
2008238	6	0.0541428082584187	0.226280455285152
2008238	7	0.0506084680138809	0.213808496492036
2008238	8	0.0476500100961345	0.197782157386002
2008238	9	0.0420372782206368	0.179896802018506
2008238	10	0.0405560633193868	0.170017494498031
2008238	11	0.0433206846837547	0.162195812557288
2008238	12	0.0456351336609324	0.149855964112018
2008238	13	0.0389512983770649	0.114411793033728
2008238	14	0.0251471314904945	0.0724219900985368
2008238	15	0.0238559250701563	0.0677244806506563
2008238	16	0.0257231533006188	0.076110702705087
2008238	17	0.0261334296470101	0.0893156120511533
2008238	18	0.0299727320973266	0.112857141824832
2008238	19	0.0347983417532514	0.128964025022836
2008238	20	0.0385084750559836	0.146498556425735
2008238	21	0.0406575046234873	0.151588583409083
2008238	22	0.0440260673564848	0.156069918133927
2008238	23	0.045622290772351	0.159121325828422
2008239	0	0.044591434391901	0.161652246613648
2008239	1	0.0478002745894186	0.184096953699773
2008239	2	0.0544153956909576	0.212018956938683
2008239	3	0.0602221578831496	0.239318665368042
2008239	4	0.0846601028292119	0.324856734300864
2008239	5	0.105686389270088	0.398305876159773
2008239	6	0.11991075527275	0.440187755738845
2008239	7	0.146290201733391	0.502005898768932
2008239	8	0.187272206063421	0.6181674535399
2008239	9	0.248159278830245	0.753113229177582
2008239	10	0.280454533602346	0.832241413567621
2008239	11	0.28779512483232	0.841875341812638
2008239	12	0.264442560633838	0.800131595844155
2008239	13	0.277617707889258	0.82347947253424
2008239	14	0.287288893117763	0.801778489407245
2008239	15	0.27804813523073	0.739741469746901
2008239	16	0.258745801403887	0.686065943311013
2008239	17	0.242648488164049	0.66059335044308
2008239	18	0.236056839473329	0.672363147648576
2008239	19	0.240688728136846	0.706747626584097
2008239	20	0.24058849931247	0.746537990732607
2008239	21	0.237651376046292	0.767703661437243
2008239	22	0.230899007088095	0.775017323773069
2008239	23	0.220170561174062	0.778415012404491
2008240	0	0.212687569865641	0.780558448542818
2008240	1	0.20161993786354	0.778675984458356
2008240	2	0.187130786194427	0.775216897027142
2008240	3	0.179413026174375	0.775018401364966
2008240	4	0.167467321706215	0.781040161123786
2008240	5	0.176458373713889	0.794889733869319
2008240	6	0.203093214279415	0.810219854392298
2008240	7	0.230814928888519	0.800997324591373
2008240	8	0.291057190159389	0.836386209943851
2008240	9	0.269475173627533	0.684757232417523
2008240	10	0.209217375834559	0.489538035738558
2008240	11	0.175304596418335	0.396841914652909
2008240	12	0.160159936169399	0.349252574480336
2008240	13	0.157237367810649	0.325517726067977
2008240	14	0.159411369814869	0.325097052890321
2008240	15	0.173847837574058	0.386333668129342
2008240	16	0.178411566279613	0.465629331655469
2008240	17	0.173264374758587	0.48972744181142
2008240	18	0.174049615247364	0.487696279757354
2008240	19	0.163385452518542	0.487675947784331
2008240	20	0.154491293552346	0.464986453016841
2008240	21	0.147899735402408	0.443130275769309
2008240	22	0.146048564308221	0.426385148861356
2008240	23	0.139209366982386	0.416295068867348
2008241	0	0.135345866055417	0.416419159941559
2008241	1	0.131576813531214	0.43272141328289
2008241	2	0.133172249449435	0.465285041346635
2008241	3	0.137147467782558	0.504199968093019
2008241	4	0.136139723291381	0.528761459832293
2008241	5	0.145645523008171	0.591674129598876
2008241	6	0.167382909932951	0.67985568216118
2008241	7	0.192779627038004	0.779116907211343
2008241	8	0.229663939966552	0.82984170770647
2008241	9	0.259793966605063	0.813545591020471
2008241	10	0.262029918151349	0.757987082059075
2008241	11	0.264433688932101	0.716272221703766
2008241	12	0.265069050478376	0.71112601276291
2008241	13	0.255971009035298	0.731282175285462
2008241	14	0.26547585846422	0.739232398443466
2008241	15	0.258070046177641	0.728667954398563
2008241	16	0.24721989334063	0.739731130014536
2008241	17	0.233243121292823	0.715782524939489
2008241	18	0.188859790673514	0.607058609025335
2008241	19	0.152516333591618	0.500815775509387
2008241	20	0.130512022970686	0.442302043327595
2008241	21	0.138677285799399	0.481310061131432
2008241	22	0.157453481288801	0.572645730644488
2008241	23	0.16296431382721	0.629698052285833
2008242	0	0.160163744933871	0.661005988152274
2008242	1	0.149042563889741	0.683176937638603
2008242	2	0.143665565255013	0.739635060730156
2008242	3	0.13408732114169	0.736204988099098
2008242	4	0.0931667071877656	0.561039186037031
2008242	5	0.063172331575843	0.330795391564282
2008242	6	0.0705511428735146	0.284427841284067
2008242	7	0.0767334980303802	0.271396201746622
2008242	8	0.0913802028004165	0.284481212242821
2008242	9	0.152660088225928	0.403140185103872
2008242	10	0.228238818626471	0.540146236303115
2008242	11	0.267800707914191	0.573097904441152
2008242	12	0.258841855871839	0.528910022444135
2008242	13	0.230829415845355	0.460434036748933
2008242	14	0.203503313275278	0.406751077944489
2008242	15	0.204384278845987	0.401912407127007
2008242	16	0.202685929247704	0.400100884746967
2008242	17	0.20276486021592	0.404691213433783
2008242	18	0.199533081777533	0.413680569486554
2008242	19	0.191471468824404	0.418863039695815
2008242	20	0.178018394778714	0.416030216388399
2008242	21	0.158935222456661	0.412591903039062
2008242	22	0.14072630923421	0.406996802281525
2008242	23	0.127721454249873	0.394215703898868
2008243	0	0.11575683081534	0.373593757470504
2008243	1	0.107777226328234	0.349598571464103
2008243	2	0.0998744574953067	0.323420670501488
2008243	3	0.0909820662668835	0.294100988610826
2008243	4	0.0840650842965611	0.268496156866714
2008243	5	0.0792091728923066	0.247881859560421
2008243	6	0.0745965755236708	0.231637869033213
2008243	7	0.115281739222263	0.316585934864347
2008243	8	0.144841350461013	0.351411322431193
2008243	9	0.146046954454866	0.35818849457402
2008243	10	0.145722632698498	0.351555799872827
2008243	11	0.142581454734512	0.328538610731894
2008243	12	0.137820682760019	0.308447776681584
2008243	13	0.131615363134972	0.286524692082194
2008243	14	0.127308995939077	0.269629630155626
2008243	15	0.123260656649627	0.256898746518358
2008243	16	0.116566722950077	0.246700107096602
2008243	17	0.108741726780656	0.236315416883366
2008243	18	0.10028635439556	0.223973774145521
2008243	19	0.0915102967025953	0.208611830643341
2008243	20	0.0824908933375103	0.191614915042441
2008243	21	0.07219714558128	0.173793836065036
2008243	22	0.0599157743387716	0.156036605381206
2008243	23	0.048940146657388	0.137594175716643
