# Supplementary material for: A comparison of sea salt emission parameterizations in northwestern Europe using a chemistry transport model setup
Source: Copernicus journal article supplement (doi:10.5194/acp-16-9905-2016), 2016-08-08
Supplement: Supplementary file 2 [file acp-16-9905-2016-supplement.zip › conc/conc.timeseries.values.sum2008.ov14.Na.DE0044R.csv]

doy	hour	pm2.5	pm10
2008183	0	0.0310824179295335	0.0487537912765921
2008183	1	0.030124981948008	0.0463974332368543
2008183	2	0.028980778728227	0.0433009459394261
2008183	3	0.0279281411124032	0.0406343452379161
2008183	4	0.0262064903363335	0.0383411690788567
2008183	5	0.0257307551130039	0.0392845493443641
2008183	6	0.0250821596954441	0.0396508764397492
2008183	7	0.0220586704441437	0.0362675845781359
2008183	8	0.0214217332378092	0.042092610286186
2008183	9	0.0230693906477324	0.0462999811887905
2008183	10	0.0214081370048472	0.043068266169434
2008183	11	0.0198353102683181	0.038592662847637
2008183	12	0.0179603604210457	0.0340719328432649
2008183	13	0.0159797855362377	0.029528019350957
2008183	14	0.0144043747353122	0.0258891104387805
2008183	15	0.0130566611311722	0.0229120928184214
2008183	16	0.0119631137380436	0.020593956485637
2008183	17	0.0113530497578198	0.0189482468053357
2008183	18	0.0113867866344956	0.0174148918055234
2008183	19	0.0107435492844413	0.0156916015084943
2008183	20	0.0110282937939199	0.0168228339808062
2008183	21	0.0118179140956782	0.0187323365768003
2008183	22	0.0126836355003303	0.0203567153483516
2008183	23	0.0135364330056451	0.0218332902132841
2008184	0	0.0142690038429288	0.0226540739156954
2008184	1	0.0147153873108954	0.0225856910427235
2008184	2	0.0145766423512622	0.0211944391298185
2008184	3	0.0140368357870366	0.0191326269084269
2008184	4	0.0134131833610598	0.0175560372772105
2008184	5	0.0123222994769726	0.0162006737797184
2008184	6	0.0107003158919582	0.0144260288306146
2008184	7	0.00972963984459452	0.0133514435360114
2008184	8	0.00944707735136486	0.0132235871616793
2008184	9	0.0103030822493391	0.0150662657855825
2008184	10	0.0104434384975445	0.0150632683162067
2008184	11	0.00996635216605552	0.0140665715881024
2008184	12	0.00925584879318199	0.0127821683423232
2008184	13	0.00868780475399831	0.0117878500844905
2008184	14	0.00811928937054614	0.0108816421504765
2008184	15	0.00755618785101387	0.0100495250657513
2008184	16	0.00710185675323614	0.00939252658895642
2008184	17	0.00660336099613247	0.00893081287851675
2008184	18	0.0061805773840732	0.00872345688197407
2008184	19	0.00602261777950597	0.00806853952488838
2008184	20	0.00558658477776144	0.00697438541869618
2008184	21	0.00577982197378656	0.00681709144468819
2008184	22	0.00607914870370022	0.00710714139043794
2008184	23	0.00610241280473481	0.00721814101963071
2008185	0	0.00603630198791215	0.00726182489590356
2008185	1	0.00591729002704615	0.00737473186027269
2008185	2	0.00582753179394835	0.0075123499859564
2008185	3	0.00584457347116828	0.00777075475507892
2008185	4	0.00579922815887551	0.00787001643859158
2008185	5	0.00558287034527155	0.00738803082208683
2008185	6	0.00539145094951491	0.00684510669661688
2008185	7	0.00531202786738921	0.00655344581365276
2008185	8	0.00532709714232784	0.0065053851436679
2008185	9	0.0054149539066354	0.00661571975609086
2008185	10	0.00545189309734875	0.00664002940465066
2008185	11	0.00545895791945466	0.00665833634000129
2008185	12	0.00538209618369804	0.00657403138276949
2008185	13	0.00527125132653676	0.0064086144575247
2008185	14	0.00517177353064901	0.00625783429830543
2008185	15	0.00506274389209304	0.00610075862435464
2008185	16	0.00493037988764682	0.00596513351961571
2008185	17	0.00472626376134025	0.005807206209405
2008185	18	0.00450177015642906	0.00558425985466952
2008185	19	0.00434300247372757	0.00535927818441773
2008185	20	0.0041254326541525	0.00494945389013506
2008185	21	0.00281255767157179	0.00336163721204965
2008185	22	0.00202374329702611	0.00241061396555421
2008185	23	0.00193440751119215	0.0022691507423328
2008186	0	0.00211787055788511	0.00250829749210568
2008186	1	0.00290653213913633	0.00365497916530429
2008186	2	0.00498292887110076	0.0072053017981341
2008186	3	0.00925174534529323	0.0144970377853256
2008186	4	0.012932238466411	0.0227059916538705
2008186	5	0.0108417856857414	0.0215705426226079
2008186	6	0.0049704156115516	0.0102027364761623
2008186	7	0.00159046112628933	0.0031696467364169
2008186	8	0.000825114255832675	0.00180795863476839
2008186	9	0.000619918674087285	0.00120135829475202
2008186	10	0.000420953782610602	0.000769293694514995
2008186	11	0.000408309340933327	0.000700966646524994
2008186	12	0.000298805501530281	0.000508664073469443
2008186	13	0.000227878176252192	0.000377935875008089
2008186	14	0.000123814544438856	0.000211578041889612
2008186	15	5.84693513939598e-05	0.000103260747891254
2008186	16	4.208430322778e-05	7.76342108778757e-05
2008186	17	2.25302705723196e-05	4.58076530280573e-05
2008186	18	1.35984796306473e-05	2.79962437105348e-05
2008186	19	1.05516546654835e-05	2.09821124962996e-05
2008186	20	1.22604933596387e-05	2.46360855404772e-05
2008186	21	1.58387044419593e-05	3.58913256652769e-05
2008186	22	1.46102815777885e-05	3.42652501736551e-05
2008186	23	1.76409727640537e-05	3.91255135163915e-05
2008187	0	3.47480534901559e-05	8.12950109336921e-05
2008187	1	0.000198409928761254	0.000427580358904581
2008187	2	0.000942966391757997	0.00164794411400116
2008187	3	0.00352944836282583	0.00604601352196451
2008187	4	0.00808693324114296	0.014904330398123
2008187	5	0.0138590511803934	0.0311237032071753
2008187	6	0.0166846342099506	0.0466729609910019
2008187	7	0.0147051384347712	0.0402877654364857
2008187	8	0.0125444406397997	0.034333542420851
2008187	9	0.011956967027705	0.0322162912497976
2008187	10	0.0122275563535801	0.0302951547636277
2008187	11	0.0120387173382684	0.0267799396698144
2008187	12	0.00967774271017407	0.0222059171513694
2008187	13	0.00774769510078136	0.0171184385472498
2008187	14	0.00590705836608168	0.0108773753747648
2008187	15	0.0051474075227331	0.00781044335808656
2008187	16	0.00464823152464168	0.00657587182417007
2008187	17	0.00424546948282086	0.0057193193638439
2008187	18	0.00389420585188363	0.00501694421054157
2008187	19	0.0036318412999454	0.00448048775298607
2008187	20	0.00339124117749336	0.00404181288253201
2008187	21	0.00325642174208581	0.00379024509576385
2008187	22	0.00315384124141013	0.00363608772241557
2008187	23	0.00305463403205333	0.00352906924194447
2008188	0	0.00299000548490765	0.00350882610119154
2008188	1	0.00301849913255875	0.0035960638765074
2008188	2	0.00304226731261512	0.00363707707116534
2008188	3	0.00318094801583345	0.00381067011629792
2008188	4	0.00346268878444283	0.0043210194316843
2008188	5	0.00468399426484341	0.00649126423578896
2008188	6	0.00658840249592917	0.0116384908195585
2008188	7	0.0123092818355526	0.0299844346591218
2008188	8	0.0265727757137293	0.0749674880783297
2008188	9	0.0373509903594637	0.113540474746976
2008188	10	0.0382038640104698	0.121598017590549
2008188	11	0.0419571282388507	0.124229695181004
2008188	12	0.0521903374573257	0.144623711965167
2008188	13	0.053158896391346	0.141698989632714
2008188	14	0.0508568500095977	0.132296799234741
2008188	15	0.0468437114403704	0.12109917871223
2008188	16	0.0390455646168246	0.100494158850225
2008188	17	0.0387450184410268	0.0830806633411422
2008188	18	0.0343257668340364	0.0833568694354982
2008188	19	0.0435867115640278	0.116604766900749
2008188	20	0.0746160241578176	0.186274959606274
2008188	21	0.0924197596425134	0.229214114216928
2008188	22	0.0896356177673523	0.233637806486478
2008188	23	0.08234038613608	0.229091507292955
2008189	0	0.0754315267133253	0.223898169728095
2008189	1	0.0694800293047328	0.218565430756463
2008189	2	0.0623167618538793	0.210965603023068
2008189	3	0.0556360692871913	0.201624199586396
2008189	4	0.0497636302065474	0.193610399691092
2008189	5	0.0825865041904837	0.213128555665814
2008189	6	0.105105322392895	0.209628999016347
2008189	7	0.109208977719502	0.201649022417459
2008189	8	0.11362661350249	0.208471649000892
2008189	9	0.136734989021583	0.251632573651123
2008189	10	0.164695753269038	0.311747171489683
2008189	11	0.158529118213264	0.292462167340292
2008189	12	0.146221412863938	0.255504903310905
2008189	13	0.14321847262757	0.246592818908058
2008189	14	0.147293460693618	0.255509516220238
2008189	15	0.158877232283838	0.26411421279477
2008189	16	0.167069233734065	0.26667064414444
2008189	17	0.173559791235042	0.274205140970089
2008189	18	0.180458873412507	0.296546968442425
2008189	19	0.182504736410599	0.297436624304674
2008189	20	0.172969896664094	0.270032237851099
2008189	21	0.127422763129204	0.220826165962846
2008189	22	0.113241089336858	0.208941013365183
2008189	23	0.0940768686771876	0.175066994953723
2008190	0	0.0544431507834626	0.112204094146572
2008190	1	0.0437054967562585	0.101615432390987
2008190	2	0.0344547099521188	0.0876057921190798
2008190	3	0.0337504090640843	0.085936474209915
2008190	4	0.0312219879659328	0.0760430422801112
2008190	5	0.0238998315969127	0.0596480326618229
2008190	6	0.0185346170043297	0.0504898934127977
2008190	7	0.0145581902632719	0.0412082589304597
2008190	8	0.0108309756816018	0.0317622872182123
2008190	9	0.0172616062721266	0.0470308104921841
2008190	10	0.0365918686770585	0.0829914857044815
2008190	11	0.0424654834840263	0.0821700546062286
2008190	12	0.0424435663047523	0.0742276301340397
2008190	13	0.0390414755833348	0.0642983803207218
2008190	14	0.0387750424287205	0.0643558294803385
2008190	15	0.0363648179896467	0.0621699849804304
2008190	16	0.0235472144114442	0.0409033608664536
2008190	17	0.0121995575595873	0.0192120616461396
2008190	18	0.0535525279357608	0.104885242824303
2008190	19	0.081058988709383	0.168145378917965
2008190	20	0.0727697834740739	0.155437411922919
2008190	21	0.101261208311635	0.176257402290567
2008190	22	0.173593336241887	0.278113830955016
2008190	23	0.12532171976037	0.218804476772324
2008191	0	0.0716583025066361	0.122369277240965
2008191	1	0.0654485045675301	0.11347418625323
2008191	2	0.0506057666160762	0.0845747474692707
2008191	3	0.0516604100785677	0.0766093588759644
2008191	4	0.0875874643525868	0.140020879407557
2008191	5	0.178254949514693	0.325504570075252
2008191	6	0.294938144161605	0.551720559645169
2008191	7	0.371721249594933	0.677236438231956
2008191	8	0.401775426286069	0.718938329760452
2008191	9	0.417887570079198	0.686679002873507
2008191	10	0.406111609035198	0.63006998140656
2008191	11	0.349379371686364	0.530923847381389
2008191	12	0.310164296236773	0.453913873676198
2008191	13	0.307031826735943	0.433736391967757
2008191	14	0.305453675086926	0.422425297849757
2008191	15	0.292208953111939	0.415103257091459
2008191	16	0.257772730228406	0.385893754472913
2008191	17	0.219753259123391	0.345458746758195
2008191	18	0.195189181088084	0.320452955420355
2008191	19	0.190403391762658	0.311917099327005
2008191	20	0.144043673666235	0.262482898467604
2008191	21	0.0309308925502137	0.0564120474321434
2008191	22	0.0189335817569454	0.0361349729195886
2008191	23	0.0200792503041106	0.0389890829380091
2008192	0	0.0265123028218083	0.062119884934215
2008192	1	0.0294657745593527	0.0858770071376865
2008192	2	0.0258294563090182	0.0940181614803631
2008192	3	0.0155350085849766	0.0824254338119754
2008192	4	0.0316492047821218	0.164315248809543
2008192	5	0.0843349883673315	0.373995916925788
2008192	6	0.091620587299955	0.351768036031864
2008192	7	0.0774971972023879	0.300692570951057
2008192	8	0.0669734703029599	0.254487453139986
2008192	9	0.0663886031206407	0.237509085134009
2008192	10	0.0848692947274798	0.267542972946451
2008192	11	0.10330387906744	0.294056713200878
2008192	12	0.118900167068786	0.30920712146999
2008192	13	0.150700554543369	0.330527576674304
2008192	14	0.147852567725253	0.297738713286786
2008192	15	0.143044418888189	0.284280515792834
2008192	16	0.133817837589557	0.279891056188766
2008192	17	0.119999456136659	0.276470060375565
2008192	18	0.107619260570158	0.273520132228861
2008192	19	0.0982959722575669	0.269181142274795
2008192	20	0.0906694563417496	0.260765385314775
2008192	21	0.0848575025809782	0.250313672365637
2008192	22	0.0798738600919914	0.240461961424688
2008192	23	0.0749260244244536	0.232307302511104
2008193	0	0.0690235365382766	0.22145530682245
2008193	1	0.0640159495362112	0.203823025235747
2008193	2	0.0644620045589167	0.189494591043875
2008193	3	0.0629159354559685	0.172661596747962
2008193	4	0.0653121882342188	0.166583398024046
2008193	5	0.0664441280582407	0.160720619355096
2008193	6	0.0650783305495697	0.158028470521566
2008193	7	0.062910549517259	0.149569306514655
2008193	8	0.0597413861380164	0.139058926124298
2008193	9	0.0555786104920839	0.128364693666493
2008193	10	0.0526114419935719	0.118069447772768
2008193	11	0.0506793589626755	0.110858229470814
2008193	12	0.0424326389115338	0.0926767049807602
2008193	13	0.0349519132491228	0.0741223676094682
2008193	14	0.0296345130328845	0.0648406880998463
2008193	15	0.027131724700065	0.0617677038988508
2008193	16	0.0252451484108631	0.0608583256691883
2008193	17	0.022504243927708	0.0604533007790819
2008193	18	0.0181370496972585	0.0593957485198709
2008193	19	0.0154610095570853	0.0559860502338998
2008193	20	0.0147063268375294	0.0497763453425349
2008193	21	0.00918851527121082	0.0350420792638256
2008193	22	0.00471139888128288	0.0241490962078112
2008193	23	0.0044892506499508	0.0261351888450839
2008194	0	0.00337929759569713	0.0191077045614119
2008194	1	0.00462987200764163	0.0236260306481411
2008194	2	0.00640982735948172	0.0319320717163501
2008194	3	0.00699626786297776	0.0319658582215257
2008194	4	0.00710769107556565	0.0302254127819431
2008194	5	0.00832601621209894	0.0302232243479711
2008194	6	0.00903501919569138	0.0282021105822165
2008194	7	0.00797629630706259	0.0243780318412406
2008194	8	0.00766808802098572	0.0235999076427965
2008194	9	0.00913205723367494	0.0250603829750549
2008194	10	0.0120872815300538	0.0253350326759973
2008194	11	0.0186303242568077	0.0341915418135725
2008194	12	0.03393343536456	0.0574213407160136
2008194	13	0.0498677086992398	0.0773201143619863
2008194	14	0.0592051162764789	0.0864366130743525
2008194	15	0.0661210895186744	0.0915890040322795
2008194	16	0.0731728838700133	0.099821981060124
2008194	17	0.0861258610200096	0.125947373072076
2008194	18	0.116847234199327	0.18632472414495
2008194	19	0.154260659482759	0.252148017620582
2008194	20	0.159009061780514	0.27079785047736
2008194	21	0.150831112718786	0.274194900892945
2008194	22	0.147048399865098	0.273859948914479
2008194	23	0.136595108432159	0.26165461597448
2008195	0	0.1001735802277	0.209037726345698
2008195	1	0.0664268436364753	0.151814231140811
2008195	2	0.0451193251232808	0.112219000070992
2008195	3	0.0372017514852845	0.0972103449861459
2008195	4	0.0366914292549597	0.10003252217009
2008195	5	0.0322842033695354	0.0915709182242862
2008195	6	0.0310498884306194	0.0736318908903832
2008195	7	0.0534608939861199	0.11928400791216
2008195	8	0.0807473619120924	0.176962905062265
2008195	9	0.0942734695594397	0.199428175053737
2008195	10	0.0976978623949045	0.20285591705524
2008195	11	0.0910786550650558	0.188440673957444
2008195	12	0.0888716884466896	0.183363960980467
2008195	13	0.0902846218344972	0.187105969617431
2008195	14	0.0880938231549707	0.193111103315775
2008195	15	0.0749485696789951	0.179512224673696
2008195	16	0.061346000669507	0.151937820706144
2008195	17	0.0472736998297171	0.126474595298576
2008195	18	0.0376891279433935	0.105594279192729
2008195	19	0.0290947729057503	0.0834115744990319
2008195	20	0.0241153512096465	0.0647178292487633
2008195	21	0.0229170623615879	0.0585674091745937
2008195	22	0.0227100149356058	0.0554243143719673
2008195	23	0.0171389263874295	0.0398287192429512
2008196	0	0.00970790458779638	0.0223999352140164
2008196	1	0.00644616847504695	0.0146242976607079
2008196	2	0.00552235827360853	0.0127803429431186
2008196	3	0.00505767378370054	0.0118927760574524
2008196	4	0.00484343851604922	0.0111365037555646
2008196	5	0.00565048031874692	0.0131309258588532
2008196	6	0.00796204248481731	0.0166732685300114
2008196	7	0.0129345894248548	0.0235643718214528
2008196	8	0.0317314474872718	0.0560047773854305
2008196	9	0.0490893491665349	0.0938321878029949
2008196	10	0.0636777289438708	0.126060496063304
2008196	11	0.0698938392374456	0.136325876251252
2008196	12	0.0723581781163112	0.13477650780898
2008196	13	0.0790931087117603	0.139132222348875
2008196	14	0.0816716794164165	0.143751161666832
2008196	15	0.0796433362198434	0.141538459641553
2008196	16	0.0757660824518548	0.136889634354597
2008196	17	0.0742505479002534	0.137001414776161
2008196	18	0.0731306676682644	0.137842945048269
2008196	19	0.0629069606200969	0.124018581360564
2008196	20	0.0463600090953438	0.0985801438992876
2008196	21	0.0327686918568225	0.074022732530841
2008196	22	0.0240745106430951	0.0559653354560821
2008196	23	0.0195573167892632	0.0456255751737221
2008197	0	0.0171493520348219	0.0391037525222166
2008197	1	0.0147437082036006	0.0343288136985775
2008197	2	0.0141360567739706	0.033384340600706
2008197	3	0.0136786603902757	0.0333683131500747
2008197	4	0.0151214679777782	0.0415982915224259
2008197	5	0.0185248951130625	0.0579933315027157
2008197	6	0.0365563628586843	0.113240820453053
2008197	7	0.100106433971317	0.258953582278851
2008197	8	0.121752350947446	0.242873007171068
2008197	9	0.0981419035696173	0.208239038313339
2008197	10	0.0979313909549928	0.204354825139229
2008197	11	0.112691366098713	0.241444870768733
2008197	12	0.126084837218608	0.248353850512612
2008197	13	0.0947975085280679	0.176339938093615
2008197	14	0.0763594398482913	0.139589138104335
2008197	15	0.0671425569700871	0.125976235126146
2008197	16	0.0633884494113962	0.120068672507797
2008197	17	0.0578891125719822	0.116703108515945
2008197	18	0.0496818087311576	0.112741431816883
2008197	19	0.0423044839924449	0.105749928564474
2008197	20	0.0366587237818686	0.0972696081927564
2008197	21	0.0312548960205077	0.0875770834577062
2008197	22	0.0261373927311027	0.0769672654141396
2008197	23	0.0226046792519427	0.0658365496530969
2008198	0	0.0204087023667632	0.0568512990260043
2008198	1	0.0180729118456839	0.0514339897803334
2008198	2	0.0147211636692328	0.0440303333364396
2008198	3	0.0107700290398745	0.03449500288613
2008198	4	0.00773294631603316	0.02361844820512
2008198	5	0.00501645251383049	0.0139539084186254
2008198	6	0.000809105929802605	0.00218030222371578
2008198	7	0.000511235870026316	0.00119982684371256
2008198	8	0.00313918434191493	0.00675144784276691
2008198	9	0.00507497254979145	0.00990314411365725
2008198	10	0.00653425076543124	0.0146480248433458
2008198	11	0.00850084120832504	0.0188414742232155
2008198	12	0.0101160388988661	0.0216708325742101
2008198	13	0.0105981607190567	0.0211557717733727
2008198	14	0.00778222998942635	0.0160131777308375
2008198	15	0.00612899063729146	0.0130155424654972
2008198	16	0.00554534117260898	0.0122067948247272
2008198	17	0.00465604443813542	0.00945495870836847
2008198	18	0.00421392672276294	0.00959492575850815
2008198	19	0.00846760768257383	0.025032263922781
2008198	20	0.0247303534821377	0.0778445866710647
2008198	21	0.0455728570549743	0.136865140242063
2008198	22	0.0515109608859402	0.154641549021552
2008198	23	0.0548711421595431	0.153279364408775
2008199	0	0.0584722211319027	0.152509381728842
2008199	1	0.0657281385646066	0.161879747426668
2008199	2	0.0761800933886412	0.180616267242536
2008199	3	0.0855493229373935	0.205652993549967
2008199	4	0.10137322881234	0.251572459743751
2008199	5	0.13864921754714	0.331262935812738
2008199	6	0.182754753127067	0.40178743743479
2008199	7	0.188873240548217	0.390400034530577
2008199	8	0.180780671887057	0.354126752717349
2008199	9	0.163695889926728	0.317757891634033
2008199	10	0.153387731204774	0.306622843915015
2008199	11	0.159819432954352	0.324231283737735
2008199	12	0.170543960440643	0.348161404923247
2008199	13	0.172332575523018	0.353012866108863
2008199	14	0.170761213745937	0.339657718624409
2008199	15	0.161150053588922	0.312024898624482
2008199	16	0.138910803737538	0.27671291532235
2008199	17	0.115773216052946	0.245155317940125
2008199	18	0.100300455244635	0.221566702559675
2008199	19	0.0900116125322065	0.205831512541019
2008199	20	0.0915831801819574	0.197118128118167
2008199	21	0.0966502133957786	0.203514218480472
2008199	22	0.0887611865069961	0.201779570014529
2008199	23	0.0728562210502416	0.177739001556749
2008200	0	0.0523566496255004	0.140565840945992
2008200	1	0.041333966488114	0.118272104009284
2008200	2	0.03517148401516	0.113821252812854
2008200	3	0.0318356153005652	0.119514190870805
2008200	4	0.0296972872016081	0.127556546085272
2008200	5	0.0279048123882024	0.133983245868786
2008200	6	0.0329131508022217	0.141606933204961
2008200	7	0.0469740215791298	0.158184370898125
2008200	8	0.0606582561440238	0.164273682193568
2008200	9	0.0577637773135076	0.143272804359177
2008200	10	0.0517088275231868	0.125876916610633
2008200	11	0.053038575198732	0.116822128968539
2008200	12	0.0542002745341282	0.117148817294908
2008200	13	0.0515868274963936	0.113523793562911
2008200	14	0.0434386264356067	0.101536685221754
2008200	15	0.0288375867523751	0.0794262158438599
2008200	16	0.0201937089636801	0.0647898828587611
2008200	17	0.0159026756051697	0.0550950901426952
2008200	18	0.0116890620501154	0.0434484036953005
2008200	19	0.00999700688646303	0.0373649640823553
2008200	20	0.00955140927863813	0.0431138393986977
2008200	21	0.0162124338090771	0.0759708294785217
2008200	22	0.0274958308843411	0.120947178345178
2008200	23	0.0411172196358755	0.16089406744822
2008201	0	0.0479643956940269	0.186937622671969
2008201	1	0.0539686848633733	0.215567818166265
2008201	2	0.0524701333940662	0.244395174008666
2008201	3	0.0464128622117758	0.242329540246589
2008201	4	0.0378791133541139	0.226228045143473
2008201	5	0.0334009920194821	0.205574728652334
2008201	6	0.0416531567434609	0.174813385843924
2008201	7	0.0738470576768441	0.250595354352016
2008201	8	0.0918790553554314	0.290522386789155
2008201	9	0.0830524255770915	0.234977593440754
2008201	10	0.0689332432352408	0.157122492172427
2008201	11	0.0525154103855178	0.103575735089806
2008201	12	0.0490152171725261	0.086251080583504
2008201	13	0.0530050501471569	0.0908621859357038
2008201	14	0.0407384551220061	0.0787985916905444
2008201	15	0.0249733238080777	0.0447549484057874
2008201	16	0.0501199379451453	0.0945169887866818
2008201	17	0.0791724461122323	0.148475302308257
2008201	18	0.0788053752897968	0.154266671808343
2008201	19	0.0704010623141925	0.155212601724768
2008201	20	0.0674156720231456	0.144377917811547
2008201	21	0.0448219900175845	0.113196378462434
2008201	22	0.0312644675584512	0.0853217039682861
2008201	23	0.0279975864174004	0.0823997730428175
2008202	0	0.0385091322980261	0.113844307367118
2008202	1	0.0526465627475984	0.143695325038828
2008202	2	0.049245868563351	0.131758401316408
2008202	3	0.0287241597102012	0.0716735042171287
2008202	4	0.0198946450536339	0.0472431031430597
2008202	5	0.017461889879373	0.0432069969610318
2008202	6	0.016503989441751	0.041411937584323
2008202	7	0.0193032475395934	0.0508860138068594
2008202	8	0.0194312081561542	0.0498364785759698
2008202	9	0.0198479270603475	0.0497390562550742
2008202	10	0.0212510883381126	0.0522981041828032
2008202	11	0.0203974134891974	0.046793670724436
2008202	12	0.0179045205721892	0.0372947697804701
2008202	13	0.0164510043783239	0.0317384918139337
2008202	14	0.0178330911529839	0.0345913325046746
2008202	15	0.0226690326489855	0.0455323880539192
2008202	16	0.0224400750901472	0.0435875557850849
2008202	17	0.0216143596429405	0.0387321937306764
2008202	18	0.0208715438341939	0.0336285195051448
2008202	19	0.0196957515149159	0.0302245796452249
2008202	20	0.0196245991554727	0.0278649077957368
2008202	21	0.0232186565989556	0.0332015864414971
2008202	22	0.0299278984440616	0.0432924706575597
2008202	23	0.0323421819271179	0.0486655275853357
2008203	0	0.0310563780182656	0.0462426719828586
2008203	1	0.0292212920209363	0.043979359760043
2008203	2	0.0292130718381558	0.0455522787093281
2008203	3	0.0317294249360211	0.0509983104323319
2008203	4	0.0303288397336975	0.0506574104699507
2008203	5	0.0329393719055126	0.0611716189725943
2008203	6	0.0473549946506515	0.110258651205574
2008203	7	0.08953448986146	0.216155755189404
2008203	8	0.116458124839308	0.343795108115807
2008203	9	0.148860736907094	0.458300975138225
2008203	10	0.125313281737575	0.35723327734704
2008203	11	0.101027470676111	0.280904390175206
2008203	12	0.0702380827989276	0.187433686261789
2008203	13	0.0295298258642324	0.0731974915349201
2008203	14	0.0318209500770135	0.0729886566573923
2008203	15	0.0303011058627165	0.0719303105623379
2008203	16	0.00940658670494239	0.0331286747329154
2008203	17	0.00186039652488107	0.00783925753562573
2008203	18	0.00384783748858483	0.0137468481162669
2008203	19	0.015352660640159	0.0516632814852336
2008203	20	0.0219974363104551	0.0760091960498299
2008203	21	0.0208862023207041	0.067188257990532
2008203	22	0.020257115460012	0.0595438198101689
2008203	23	0.0108398496112348	0.0335606634306358
2008204	0	0.000274062053297981	0.000825034285558774
2008204	1	0.00203587870517565	0.00881060096876417
2008204	2	0.00800225024192497	0.0450645718370878
2008204	3	0.0114276182963416	0.0844636531389301
2008204	4	0.010399303061911	0.0856639907662707
2008204	5	0.00814724679993159	0.0650159792700905
2008204	6	0.00655553912974772	0.042577792552303
2008204	7	0.00543684018120871	0.0324454000812724
2008204	8	0.00726961663152296	0.0371329863168671
2008204	9	0.0130399089387108	0.0584508831768927
2008204	10	0.0239461470850232	0.0986395896417331
2008204	11	0.0375791617110077	0.138350770065205
2008204	12	0.0475271771976137	0.143234051480987
2008204	13	0.0513556564455854	0.134755158025853
2008204	14	0.0491212649328768	0.126245832983404
2008204	15	0.0423690783591142	0.102687902496694
2008204	16	0.0302570344749772	0.0702330328072547
2008204	17	0.0254324489216313	0.0606932276115338
2008204	18	0.0207722261239001	0.0575868119665839
2008204	19	0.0172741944385926	0.0545008199555768
2008204	20	0.0183544756935271	0.0503323145833928
2008204	21	0.0265328848339529	0.0571995650363943
2008204	22	0.0780584677000443	0.156316119430682
2008204	23	0.199983286249872	0.448817041842958
2008205	0	0.273379997203126	0.690413503470379
2008205	1	0.278770835970066	0.787266003756544
2008205	2	0.277860812529267	0.811627927433305
2008205	3	0.271259074352896	0.812650500756673
2008205	4	0.250336273658146	0.809393252499596
2008205	5	0.248486441646461	0.804070277235364
2008205	6	0.245690068659372	0.790536565876142
2008205	7	0.261102206231889	0.769017115498666
2008205	8	0.315024963856194	0.739727997792294
2008205	9	0.258576983857368	0.556851794726656
2008205	10	0.236827676708961	0.484160880519878
2008205	11	0.222455236328713	0.437026331316426
2008205	12	0.220305208940918	0.428630070952379
2008205	13	0.222749161612224	0.432069440193715
2008205	14	0.219459065742641	0.42331801598735
2008205	15	0.20776291929255	0.404603986281924
2008205	16	0.181278788662485	0.369424927502272
2008205	17	0.159971782253993	0.347848560647708
2008205	18	0.146372242644839	0.332474434045658
2008205	19	0.135059980266748	0.319678686069612
2008205	20	0.117856613043514	0.295072685347347
2008205	21	0.115631668212229	0.253921560208843
2008205	22	0.100027564741221	0.207252591211473
2008205	23	0.103618811375699	0.207993187150215
2008206	0	0.095825448245781	0.203028722520111
2008206	1	0.0805353490992326	0.182306568979569
2008206	2	0.0563509689086022	0.149919242017995
2008206	3	0.0354633538952018	0.112954708948106
2008206	4	0.0258428501675952	0.080977540015118
2008206	5	0.0166885363120819	0.0442585556378729
2008206	6	0.0106806019513809	0.0237926306111107
2008206	7	0.00881497502998145	0.0171666011200316
2008206	8	0.00982001524109652	0.0165814190736371
2008206	9	0.0136498053040105	0.0231337666791235
2008206	10	0.017050322861587	0.0283671526227376
2008206	11	0.0191283170911089	0.0300643739381045
2008206	12	0.0176243121972965	0.0276229311060927
2008206	13	0.0150042025642898	0.0236161507432591
2008206	14	0.0126309396968262	0.0194994931455344
2008206	15	0.0110872909979208	0.016728133818121
2008206	16	0.0105889901874504	0.0156415462329263
2008206	17	0.010555701065945	0.0156453285775506
2008206	18	0.011398969430557	0.0165180442641156
2008206	19	0.0111555819246768	0.0165448806360832
2008206	20	0.0103419114227088	0.014043858234933
2008206	21	0.0102803740780141	0.0130978429543006
2008206	22	0.0108605591287505	0.0137278021617542
2008206	23	0.0119896937776093	0.0151946211887119
2008207	0	0.0128612671946156	0.0166571502112279
2008207	1	0.012637994392759	0.0171382509953152
2008207	2	0.0113217458680051	0.0163168413261668
2008207	3	0.00849104037371423	0.013715146747065
2008207	4	0.00706818875289966	0.0124996806913027
2008207	5	0.00878002849688322	0.0168117471551909
2008207	6	0.014013959737457	0.0310103682653887
2008207	7	0.0219162659143972	0.0528972056968742
2008207	8	0.0323317401126667	0.0759079547146786
2008207	9	0.040647678953803	0.0878677792385545
2008207	10	0.0411550905692057	0.0809876140407989
2008207	11	0.0296570954352625	0.051194718648403
2008207	12	0.0177320361632248	0.0280524245883821
2008207	13	0.0119146428040694	0.0185237583250477
2008207	14	0.00848664309613598	0.0131112059793244
2008207	15	0.00597978423166393	0.00916194208508494
2008207	16	0.00419298757029103	0.00666170267082237
2008207	17	0.0030271041052669	0.00526818517086163
2008207	18	0.00249535436768354	0.00451351381995052
2008207	19	0.00234186359290127	0.00406836901859857
2008207	20	0.00232108950696284	0.0038512794770914
2008207	21	0.00255331422615417	0.00400455542068418
2008207	22	0.00275478153804494	0.00411750585508319
2008207	23	0.00269540716271349	0.00389523214219546
2008208	0	0.002795077056711	0.00405145157254222
2008208	1	0.00302795012712257	0.00450381494642705
2008208	2	0.00335523646618667	0.00518883952716185
2008208	3	0.00372256664205946	0.00602899437246645
2008208	4	0.00404905762711568	0.00679352418117659
2008208	5	0.00418564913870876	0.00719758568209233
2008208	6	0.00413727457452058	0.00702758244532348
2008208	7	0.00385599614137465	0.00631878588413937
2008208	8	0.00363267385094026	0.00572773272981875
2008208	9	0.003566233738983	0.00539432457252823
2008208	10	0.00318387796413312	0.00458185519979456
2008208	11	0.00337944195228649	0.00480479440045656
2008208	12	0.00356865023805861	0.00501399839100521
2008208	13	0.00365663059502009	0.00515700697398915
2008208	14	0.00360772937305372	0.00512077910547192
2008208	15	0.00337327195018916	0.00481839322060831
2008208	16	0.0029270689432706	0.0042573222821827
2008208	17	0.00243572516965827	0.0036881483112019
2008208	18	0.00217964260735064	0.00340986094884843
2008208	19	0.00220248572088966	0.00352412415895933
2008208	20	0.00245319062528641	0.00382161289002781
2008208	21	0.0031781266421857	0.00470717884340353
2008208	22	0.0043921202653974	0.0064205010356749
2008208	23	0.00452411948458899	0.0064856272581915
2008209	0	0.00456087197295301	0.0065544670447369
2008209	1	0.00498882340428682	0.00760466072309023
2008209	2	0.00553634181947211	0.00922358021381607
2008209	3	0.00587767317685292	0.0105237754071457
2008209	4	0.00597267363180068	0.0111759519914379
2008209	5	0.00630268645771462	0.0118945865878833
2008209	6	0.00702230755803101	0.012906326718393
2008209	7	0.0075924180710963	0.0132508947008055
2008209	8	0.00767851819836865	0.0126329126547729
2008209	9	0.00754328639315645	0.0117622784540178
2008209	10	0.00791318440211897	0.0118314631217746
2008209	11	0.0085023323796702	0.0122405810904196
2008209	12	0.00882959202036567	0.0124781570008462
2008209	13	0.00909479858681695	0.0127668762911679
2008209	14	0.00938442527110997	0.0129786489744144
2008209	15	0.00943291659464404	0.0130357336929152
2008209	16	0.0089812659665922	0.0125548076396883
2008209	17	0.00871299078815715	0.0124416283451894
2008209	18	0.00888695987276921	0.0134833078122027
2008209	19	0.00868959496354198	0.014093356380171
2008209	20	0.00607392789451846	0.00964653834074978
2008209	21	0.00384034675734915	0.00470037065145922
2008209	22	0.00310708097109157	0.00353009908198414
2008209	23	0.00264638123353967	0.00293857434833349
2008210	0	0.00253115778760211	0.00275654264890737
2008210	1	0.0025948164691528	0.00297758763199369
2008210	2	0.00316717998297865	0.00466872074657352
2008210	3	0.0040555958768313	0.00748972732651839
2008210	4	0.00474520688740396	0.00978415887902841
2008210	5	0.00506859073081821	0.0107282036140258
2008210	6	0.00520645490231408	0.0105000662762989
2008210	7	0.00524891879796018	0.00951694265628049
2008210	8	0.00550659086988278	0.00907435584985468
2008210	9	0.00593548679758244	0.0096402966830236
2008210	10	0.00655313309565539	0.010551582701878
2008210	11	0.00694834169974236	0.0109803489389011
2008210	12	0.00860892852759193	0.014003879536813
2008210	13	0.0112488860680393	0.0185715378875391
2008210	14	0.0138423040026581	0.0226825464946613
2008210	15	0.0165148335989931	0.0267423420314008
2008210	16	0.0195898031308991	0.0322600559543466
2008210	17	0.023827108271825	0.0416467134940428
2008210	18	0.0282821995772417	0.0545241231788215
2008210	19	0.0312292677790665	0.0655693542284648
2008210	20	0.0312294913900198	0.0709794608594203
2008210	21	0.0293130984454882	0.0704686064707245
2008210	22	0.0272920940273446	0.0686828442660337
2008210	23	0.023418865120312	0.0622521639725048
2008211	0	0.0177135570000847	0.0483084500829135
2008211	1	0.0125486818102731	0.0329287055677102
2008211	2	0.00921509505247506	0.0233854503313952
2008211	3	0.00786573018644255	0.0200309647367081
2008211	4	0.00701639036237035	0.0181076250075703
2008211	5	0.00642148334829848	0.0167738634280214
2008211	6	0.00669596155329428	0.0167316752662378
2008211	7	0.00678812742090849	0.0153440670613675
2008211	8	0.00836249538001596	0.0177594156867345
2008211	9	0.0107847207621467	0.0223353071171229
2008211	10	0.0133669090187988	0.0269692327794864
2008211	11	0.0129939742748874	0.025126720803257
2008211	12	0.0125102942303869	0.0233810629076094
2008211	13	0.012339772501898	0.022405659773905
2008211	14	0.0120566993870391	0.0217475203311044
2008211	15	0.0117707764330664	0.0218957562342122
2008211	16	0.0118507342745355	0.0228110393387405
2008211	17	0.0109682997399046	0.0230476137842286
2008211	18	0.00950370096950316	0.0223383868939678
2008211	19	0.00814817653416568	0.0207273756488145
2008211	20	0.00700116634192614	0.0178426827666964
2008211	21	0.00610616578444681	0.015674856270681
2008211	22	0.00550514977827927	0.0142658532197035
2008211	23	0.00508827460887913	0.0131790366485577
2008212	0	0.00480452649566195	0.0123740635445969
2008212	1	0.00468684816209896	0.0121582621379934
2008212	2	0.00456083646101152	0.0120486508734139
2008212	3	0.004377562976804	0.0118943268288372
2008212	4	0.00413867982327769	0.0114862729666769
2008212	5	0.00392278178210251	0.0109340633475534
2008212	6	0.00376202563554479	0.0102753444036668
2008212	7	0.00388509501651667	0.0101795469409008
2008212	8	0.00431766668207164	0.0106346713699162
2008212	9	0.00620460707906885	0.0146359010671756
2008212	10	0.00775147487183282	0.0170998921800269
2008212	11	0.00888930617566685	0.0188155663849621
2008212	12	0.00934275606135269	0.0194301467873566
2008212	13	0.00923326509034304	0.0189537824239232
2008212	14	0.00910717345397312	0.0185449503736616
2008212	15	0.00884240886631801	0.0179306008826321
2008212	16	0.00838082086438363	0.017366819962854
2008212	17	0.00752172369219611	0.0170102525622694
2008212	18	0.00624826520998136	0.0165160054796984
2008212	19	0.00559256716898276	0.015769013475484
2008212	20	0.00526316385361687	0.015203338329891
2008212	21	0.00522659108053874	0.0149625055220516
2008212	22	0.00529292947116021	0.0151150997504364
2008212	23	0.00534427066935678	0.015115839002464
2008213	0	0.00531983338781786	0.0146919727595179
2008213	1	0.00516691780394883	0.0141130529376435
2008213	2	0.00498043208557201	0.0134205322551223
2008213	3	0.0045681432333674	0.0121460921018992
2008213	4	0.00377287178642585	0.00975088374057469
2008213	5	0.00286849303047829	0.00683431880492967
2008213	6	0.00218753936154933	0.00454507282324962
2008213	7	0.00261599412632502	0.00562715982006117
2008213	8	0.00284319409181114	0.00594893300546382
2008213	9	0.00398143086016107	0.00859059456733841
2008213	10	0.005093120192769	0.0105567607364969
2008213	11	0.00549911368416066	0.0109397305163132
2008213	12	0.0059560938996723	0.0114483852679222
2008213	13	0.00611011259689974	0.0115266987990934
2008213	14	0.00592533807715741	0.0109572261949951
2008213	15	0.00568202433325763	0.0104502957591159
2008213	16	0.00541815333002492	0.0100760048132146
2008213	17	0.00504797331474288	0.0096410637734281
2008213	18	0.00446460008225119	0.00880721122743555
2008213	19	0.00354978027545087	0.00717382304613579
2008213	20	0.00280612171439595	0.00542246392132575
2008213	21	0.00238066875581801	0.00463977592081334
2008213	22	0.00220021284135244	0.00443103907371159
2008213	23	0.00214094613335583	0.00445808717496504
2008214	0	0.00203742128394928	0.00425316695040887
2008214	1	0.00195853985946246	0.00404991058235146
2008214	2	0.00194720303254239	0.00402488399525823
2008214	3	0.00193487816341647	0.00402962912312928
2008214	4	0.00196525723813748	0.00420726810469034
2008214	5	0.00204460653269641	0.00459582860639993
2008214	6	0.00220505326399654	0.0052638041446019
2008214	7	0.00248354276210339	0.00606792448101201
2008214	8	0.00266221569894473	0.00607525964012211
2008214	9	0.00297285230076384	0.00629454429526018
2008214	10	0.00328802335938213	0.00691024206275696
2008214	11	0.00344794541701749	0.00732986789679555
2008214	12	0.00384330751499	0.0084199797827352
2008214	13	0.00377780953057302	0.00855546466967186
2008214	14	0.00362665991251181	0.00869466638865625
2008214	15	0.00347266454327997	0.00891525842290689
2008214	16	0.00327496926757902	0.00890801746141236
2008214	17	0.00290676713560517	0.00881602434911424
2008214	18	0.00237541910640038	0.0084794728425
2008214	19	0.00218818423992282	0.00745597627326038
2008214	20	0.00202900811870465	0.00670651699460991
2008214	21	0.00189304357967693	0.00611784322489814
2008214	22	0.00198940210065225	0.00612769868636372
2008214	23	0.00247248297496767	0.00719840959136533
2008215	0	0.00425053241878939	0.0132977593124674
2008215	1	0.006269520001931	0.0205753091502631
2008215	2	0.00755122139371546	0.0239547747251191
2008215	3	0.00842265027650807	0.0254183032270755
2008215	4	0.0102545771905544	0.0266367578044116
2008215	5	0.0123046196022724	0.0301134124612969
2008215	6	0.0192018137747364	0.0468893381300294
2008215	7	0.0492802549434046	0.113618307264307
2008215	8	0.123517125165742	0.273041558331689
2008215	9	0.21625106314812	0.442394423609252
2008215	10	0.236030856331576	0.445747041404547
2008215	11	0.214591578431314	0.39228740590186
2008215	12	0.201845206943352	0.36404007824174
2008215	13	0.187571616724083	0.336712327006236
2008215	14	0.177006878276256	0.309597637076605
2008215	15	0.171853236054158	0.29842884479075
2008215	16	0.18768396266682	0.321726678445528
2008215	17	0.201142836834006	0.368210294669192
2008215	18	0.207600938735784	0.400145524155449
2008215	19	0.202943920778265	0.410268672336544
2008215	20	0.193491182273842	0.409047703712286
2008215	21	0.18115348142771	0.404121500642743
2008215	22	0.161608264478917	0.392414635115716
2008215	23	0.149327016022902	0.374272434895791
2008216	0	0.140217821608189	0.373455501455131
2008216	1	0.134213943174746	0.366726418845835
2008216	2	0.129339492610115	0.347044855495051
2008216	3	0.11738022913832	0.313527753558985
2008216	4	0.108955861504668	0.271394581463446
2008216	5	0.103674709793203	0.247159674336097
2008216	6	0.0996794453645927	0.228948545488263
2008216	7	0.106034257969519	0.224296919181616
2008216	8	0.124351470885214	0.259748108127271
2008216	9	0.148746303327297	0.309953590206176
2008216	10	0.18772616117522	0.367643251088057
2008216	11	0.243547500773102	0.437870825109169
2008216	12	0.250566445403902	0.429111934886814
2008216	13	0.23968291289898	0.398563015278152
2008216	14	0.223162069261004	0.357941833895701
2008216	15	0.198537500737173	0.317162034834881
2008216	16	0.164277572840907	0.266643372349766
2008216	17	0.13282766160435	0.217013299846106
2008216	18	0.104270715746078	0.179252472810015
2008216	19	0.077242106634472	0.147599195205795
2008216	20	0.0531109134340999	0.117269845679068
2008216	21	0.041591748185696	0.101638295370206
2008216	22	0.038202014977756	0.100510055620615
2008216	23	0.037373749612867	0.100925664403203
2008217	0	0.0349084211524366	0.0936486271768331
2008217	1	0.0370178707681652	0.0885247244954904
2008217	2	0.0403173828069633	0.0883560613732978
2008217	3	0.0513595375144545	0.104549497998721
2008217	4	0.0773983884645235	0.162870995672618
2008217	5	0.0811912757731895	0.206197822658472
2008217	6	0.0265853014827567	0.120624723455742
2008217	7	0.000972093920794712	0.00472105835706369
2008217	8	0.00103063965236513	0.0034025323934396
2008217	9	0.00476425285771405	0.0134660228964029
2008217	10	0.00583596237127183	0.0159085792489876
2008217	11	0.0056119209821781	0.0149307994468814
2008217	12	0.00597542285420708	0.0152332332293757
2008217	13	0.00401275588867354	0.0128694801997818
2008217	14	0.00285585332874655	0.00840483374233993
2008217	15	0.00423514170916802	0.0134344506673015
2008217	16	0.00797656048127978	0.0224735665435146
2008217	17	0.00820236592107967	0.0214062082586658
2008217	18	0.0244342980635475	0.0524254951433005
2008217	19	0.0436064448952622	0.0902603411913455
2008217	20	0.0448640702105469	0.0892787477867618
2008217	21	0.0367380688616796	0.0737062449469627
2008217	22	0.0351702324670826	0.0695035491196976
2008217	23	0.0382828789845207	0.0749960956758809
2008218	0	0.0437372524460004	0.0890464988422806
2008218	1	0.0496374506546962	0.104959599610497
2008218	2	0.0545556478912913	0.11931133511705
2008218	3	0.0471877653372098	0.111082560928502
2008218	4	0.0354353919553035	0.0887402594744742
2008218	5	0.0308451808041505	0.0807131423275776
2008218	6	0.032947148189182	0.0836218029439518
2008218	7	0.0349825050399359	0.0844306984016266
2008218	8	0.0447830901875092	0.100683509855875
2008218	9	0.0573261082939891	0.125965735002926
2008218	10	0.0682778763452518	0.144511096358752
2008218	11	0.0718249055998859	0.142060334706112
2008218	12	0.066744540289231	0.129830409673251
2008218	13	0.0617343170714888	0.11843708944009
2008218	14	0.0622794913942242	0.114991667219038
2008218	15	0.0558792043606317	0.10370609492362
2008218	16	0.0445722907230598	0.0837691344888021
2008218	17	0.0349131078389903	0.0685900282016083
2008218	18	0.027577989243328	0.0612053144647045
2008218	19	0.0271181350684685	0.0644085581013077
2008218	20	0.0275806677418952	0.0621568121282483
2008218	21	0.037350582096123	0.0700151956110705
2008218	22	0.0530242867599588	0.100053183008997
2008218	23	0.0626224951622137	0.130715105245662
2008219	0	0.0606019681455089	0.140689429815306
2008219	1	0.0518575059696779	0.12503681155382
2008219	2	0.0563351155811485	0.130274609365497
2008219	3	0.059264459866012	0.141267651157465
2008219	4	0.0420535788679865	0.106761507650424
2008219	5	0.0295276704801841	0.0795901103962684
2008219	6	0.0254304869690632	0.0664396535444206
2008219	7	0.0235250119265029	0.0642499861507562
2008219	8	0.0261972005820803	0.0748977329108832
2008219	9	0.0273819563583695	0.0800831120135544
2008219	10	0.0288113391682088	0.0867142887965937
2008219	11	0.0321674808767877	0.0980589083769946
2008219	12	0.0346033309077166	0.107645428013666
2008219	13	0.0379254562834517	0.122274309762934
2008219	14	0.0430788290954265	0.141486022593631
2008219	15	0.0488528907609275	0.161197511213104
2008219	16	0.0540838291145772	0.177970829964434
2008219	17	0.0576124791155141	0.192035886701676
2008219	18	0.059559410127063	0.20512179590675
2008219	19	0.0594376584305069	0.213191962086744
2008219	20	0.05654843053666	0.212091636664543
2008219	21	0.0526342849882174	0.207986657409972
2008219	22	0.0492993529645216	0.203012676228507
2008219	23	0.0450036614999775	0.193174318175474
2008220	0	0.0415748161315731	0.181739162089777
2008220	1	0.0389963052707328	0.169105766961237
2008220	2	0.0369410348573074	0.154481655316122
2008220	3	0.0350760732618951	0.139337683319625
2008220	4	0.029793967449277	0.122106416781541
2008220	5	0.0265094011264059	0.110602563492165
2008220	6	0.0259379927771665	0.0997573068915897
2008220	7	0.0283322962262296	0.0920746786257535
2008220	8	0.0311682750156466	0.0859230781980275
2008220	9	0.031794927438548	0.0800485430000619
2008220	10	0.0305851087753554	0.0735027692319628
2008220	11	0.0290171546588337	0.064104867249196
2008220	12	0.0268821551235444	0.0561590726994164
2008220	13	0.0255029540690931	0.049545087942783
2008220	14	0.0245904095079222	0.0456014410665882
2008220	15	0.0232330006425419	0.0424846390653932
2008220	16	0.0218039445492699	0.0404733279595318
2008220	17	0.0201730366295056	0.0397318990146561
2008220	18	0.0190030538992338	0.040177949693435
2008220	19	0.0164200739969572	0.0393948192487288
2008220	20	0.0125910597626364	0.0342394884819333
2008220	21	0.00819821812120773	0.0241199865681661
2008220	22	0.00536143968249185	0.0153987806110853
2008220	23	0.00553847068880329	0.0137709935387272
2008221	0	0.00704620750542291	0.0170496834806921
2008221	1	0.00549225221238143	0.0149096713738681
2008221	2	0.00259872334495185	0.00885538386227363
2008221	3	0.00163864383238762	0.00572428603004465
2008221	4	0.00125673400575288	0.00503926387206354
2008221	5	0.00205949756335024	0.00662076186034221
2008221	6	0.00681926898370133	0.0240579841745167
2008221	7	0.0155829911149966	0.0545395718249086
2008221	8	0.0189472480711046	0.0642616087977277
2008221	9	0.0153613905690001	0.0515948887529969
2008221	10	0.0239680188145692	0.0467817253338083
2008221	11	0.109308063812243	0.193037134279414
2008221	12	0.145009862976658	0.221330912572636
2008221	13	0.110490563939494	0.164990346740309
2008221	14	0.0541904146471754	0.0920630351299584
2008221	15	0.0104180445938847	0.0271756952903643
2008221	16	0.00649406554886461	0.0120591959902426
2008221	17	0.0162105240880294	0.0303665079916246
2008221	18	0.0198492508902521	0.0386430079448442
2008221	19	0.015622669840275	0.0367308900171948
2008221	20	0.0364869925118422	0.100916027426926
2008221	21	0.0670346546616421	0.216834756098007
2008221	22	0.0774596393346999	0.282269016279985
2008221	23	0.0620006942738558	0.283835351456667
2008222	0	0.0818253900316306	0.382725195741247
2008222	1	0.149521402154753	0.642463317733217
2008222	2	0.181647592392628	0.71939195259622
2008222	3	0.231204899254303	0.870498107390565
2008222	4	0.245203721644458	0.90716486914653
2008222	5	0.252662690988059	0.88920797890853
2008222	6	0.280986265642905	0.940530918945851
2008222	7	0.31277409014675	0.927817176988523
2008222	8	0.369689545398848	0.932823937596287
2008222	9	0.419565338357318	0.939590572740474
2008222	10	0.399895346968937	0.909426633204263
2008222	11	0.407859730033459	0.869274729205652
2008222	12	0.406222920140288	0.704673996015063
2008222	13	0.333949943214107	0.530049176727654
2008222	14	0.292866407565348	0.439146654879597
2008222	15	0.258682609297694	0.379614141414504
2008222	16	0.254189141193494	0.361345768706634
2008222	17	0.250235365942309	0.376179000380779
2008222	18	0.256324500926565	0.398576887691632
2008222	19	0.242880647315721	0.400190381480325
2008222	20	0.234538837152393	0.411890111878219
2008222	21	0.219376912235905	0.435553617146263
2008222	22	0.236411999099607	0.439167180969804
2008222	23	0.253076268034289	0.432660945142666
2008223	0	0.215079278156854	0.405770845374659
2008223	1	0.185046820515291	0.376308148863728
2008223	2	0.183049500974267	0.374116855575701
2008223	3	0.182486214596985	0.402836536185505
2008223	4	0.184145864115913	0.426400051031858
2008223	5	0.178552555030092	0.411215488768667
2008223	6	0.168637562084895	0.365030382103834
2008223	7	0.149587197268472	0.31024199168398
2008223	8	0.124446995690742	0.243374659803318
2008223	9	0.0896694940656472	0.165190754017269
2008223	10	0.0694161955436226	0.122852855986222
2008223	11	0.0607837582203988	0.102591326834833
2008223	12	0.0530460845937996	0.0865992388065823
2008223	13	0.0517980396430645	0.0813113463650589
2008223	14	0.0515674296111655	0.0784478597037683
2008223	15	0.0497917401627753	0.0760388908349371
2008223	16	0.0474892026204431	0.0746982961712025
2008223	17	0.0459505015596596	0.0746568017092721
2008223	18	0.0435511965135084	0.0740306506170487
2008223	19	0.0380135975738539	0.0708250261252401
2008223	20	0.0331156815888419	0.0656056087837964
2008223	21	0.0286151004848769	0.0569743869524319
2008223	22	0.024573814163531	0.0472460540081868
2008223	23	0.0229380947875824	0.0423843293194751
2008224	0	0.0225928987371446	0.0413047112190212
2008224	1	0.0215871510937896	0.0403726249497602
2008224	2	0.0207168676689357	0.0390998421097719
2008224	3	0.0200840066345459	0.0374724367820994
2008224	4	0.0181514744634093	0.0340208995129686
2008224	5	0.0144277836396054	0.0272683523451259
2008224	6	0.0123650079304144	0.0242674694167732
2008224	7	0.0115715186222405	0.0237657818827504
2008224	8	0.0150291695222312	0.0380504432543632
2008224	9	0.0256107309085128	0.0750120100393782
2008224	10	0.0314070321247527	0.0891897630945361
2008224	11	0.0408268836805494	0.110100322618339
2008224	12	0.0445660783008796	0.115307218101213
2008224	13	0.0463686319126554	0.119243528428259
2008224	14	0.0514881544390457	0.130117059394789
2008224	15	0.0599403311485751	0.14811386055719
2008224	16	0.0656718598001891	0.164624201636198
2008224	17	0.0681413445061187	0.179995809228133
2008224	18	0.0613612545078957	0.190119344021196
2008224	19	0.0539843962421351	0.175988745604091
2008224	20	0.042823607729033	0.151009075161207
2008224	21	0.0296856918431661	0.116133212776942
2008224	22	0.0246334476652707	0.100173090496049
2008224	23	0.0260832501686638	0.0894623253121559
2008225	0	0.016837615152026	0.0555154518824932
2008225	1	0.0128720301078103	0.0382740258493203
2008225	2	0.0108416643753086	0.0272845027693387
2008225	3	0.00760003419955869	0.0182662534479295
2008225	4	0.00750143367813079	0.0169173494941984
2008225	5	0.00980746259959884	0.0198288353769535
2008225	6	0.010100126647281	0.0187670032709313
2008225	7	0.00945851216136089	0.016727700952293
2008225	8	0.00846068566389683	0.014804028550239
2008225	9	0.0079531537611419	0.0140996839702427
2008225	10	0.00772019370644093	0.0140193782806779
2008225	11	0.00980863328135866	0.018602287861411
2008225	12	0.0099944075377235	0.0188995932891436
2008225	13	0.0169645600884383	0.0310193384712986
2008225	14	0.0276622500833462	0.0515387739629051
2008225	15	0.0297208843760577	0.0564067938166739
2008225	16	0.0268586500425268	0.0529735913948189
2008225	17	0.0219141201990929	0.0495461214183263
2008225	18	0.0241932526694521	0.0504247969661768
2008225	19	0.0128723980915709	0.0381228248412713
2008225	20	0.00232768058762601	0.0095172686654193
2008225	21	0.00136150642979534	0.00497787719052304
2008225	22	0.0041051518871956	0.0104241530744337
2008225	23	0.0135528174619499	0.0287239363048639
2008226	0	0.0248169268796723	0.0472373844347589
2008226	1	0.02715798993913	0.0459013623833876
2008226	2	0.0260284307764135	0.0430784736119397
2008226	3	0.0281026489073862	0.0533497409186778
2008226	4	0.0343502663254379	0.0716389715182761
2008226	5	0.0413043248903764	0.0867756398790882
2008226	6	0.0514664966250706	0.10914383600924
2008226	7	0.0527824504862511	0.112164785711776
2008226	8	0.0497039890017892	0.107257595519922
2008226	9	0.0436642904283393	0.0972451228244235
2008226	10	0.0449350591909828	0.106756872011967
2008226	11	0.0741320120992713	0.189443176015113
2008226	12	0.0983228450961272	0.242103370394425
2008226	13	0.163994543515789	0.292103642448341
2008226	14	0.177393605333505	0.302702881033842
2008226	15	0.166432985880987	0.311191749489814
2008226	16	0.113272606765636	0.255926564074298
2008226	17	0.0972967249314553	0.198757563268355
2008226	18	0.091681170065858	0.177083928758359
2008226	19	0.0962808113950569	0.169877592113892
2008226	20	0.0859703657874669	0.142340991758736
2008226	21	0.0617105857978116	0.105029271464209
2008226	22	0.0456693084585335	0.0910864771518068
2008226	23	0.0482325697384304	0.0974204140867937
2008227	0	0.0507798726078852	0.0989535428980862
2008227	1	0.0649936384871212	0.12273519814393
2008227	2	0.120450247772401	0.205744744820184
2008227	3	0.149504391579028	0.22205031698719
2008227	4	0.149189056263977	0.207665855984246
2008227	5	0.139363313645856	0.190572244786381
2008227	6	0.125099806711662	0.181790123112349
2008227	7	0.111052405855341	0.185909208543307
2008227	8	0.104733794839386	0.184913817217838
2008227	9	0.100634837261367	0.184183383895382
2008227	10	0.102152985301673	0.188429707295788
2008227	11	0.0938921200773812	0.16521207898649
2008227	12	0.0827660663296821	0.138742982432642
2008227	13	0.0722579886862537	0.116560417605686
2008227	14	0.0646352168781465	0.0996974786038007
2008227	15	0.0590327657104046	0.0866599250772459
2008227	16	0.0560223018173894	0.078490297167297
2008227	17	0.0554542569539096	0.0754290547140871
2008227	18	0.0559175581458249	0.0761134347614402
2008227	19	0.0558694936712888	0.0783867942062915
2008227	20	0.0580533014479237	0.0855437113385528
2008227	21	0.0582079967213743	0.0890514666220553
2008227	22	0.0577736654614402	0.0895498297774088
2008227	23	0.0570583105379255	0.090447661267746
2008228	0	0.055290311324579	0.0884388681618258
2008228	1	0.0535403917916399	0.0854328853285037
2008228	2	0.0513910055647339	0.0817510873014233
2008228	3	0.0475895744235331	0.0754537412732432
2008228	4	0.0453799120169857	0.070362295218667
2008228	5	0.0536196942366256	0.0826513849410519
2008228	6	0.0717438769044233	0.109284525987983
2008228	7	0.0914362044618928	0.151476324879711
2008228	8	0.113753782532199	0.205054013828711
2008228	9	0.120991172697598	0.218094186984855
2008228	10	0.127981588096881	0.230086949104394
2008228	11	0.129928906265432	0.230726494587127
2008228	12	0.121241204919617	0.217781644876305
2008228	13	0.108830269077996	0.201713026435661
2008228	14	0.0852471779140072	0.169058814789316
2008228	15	0.047399554397745	0.101071418291613
2008228	16	0.0159004519959132	0.0374253310442643
2008228	17	0.0161250609030871	0.0386830995291251
2008228	18	0.0177939684745121	0.043562877261221
2008228	19	0.0230591464775529	0.0583477669359166
2008228	20	0.0335248231321586	0.0902224309343973
2008228	21	0.0448643060783879	0.125132013654846
2008228	22	0.0513098242289479	0.150122020964502
2008228	23	0.0540020005416878	0.160027111263151
2008229	0	0.0532257031760545	0.164295172736833
2008229	1	0.0556023991108901	0.172959195378721
2008229	2	0.0578893005531825	0.184475974867947
2008229	3	0.0620184377455234	0.198566252725014
2008229	4	0.0640965092455617	0.20875686005459
2008229	5	0.0713274364079948	0.216323404153209
2008229	6	0.0935183977086729	0.255273097446109
2008229	7	0.112622816130673	0.293767755896624
2008229	8	0.163401400424856	0.404088649143074
2008229	9	0.194104221906344	0.450127280407176
2008229	10	0.209928436149529	0.455471074278255
2008229	11	0.220503728193827	0.44109497721482
2008229	12	0.219011749553578	0.416420109673348
2008229	13	0.213519361617728	0.389291000954635
2008229	14	0.206315709051631	0.36045384220043
2008229	15	0.194732908651228	0.329750930911509
2008229	16	0.170773166275827	0.288264571574783
2008229	17	0.148286423704023	0.248965811740455
2008229	18	0.139283424179204	0.227708721623571
2008229	19	0.124574674680723	0.209713617390132
2008229	20	0.105704581457396	0.18911517483596
2008229	21	0.0922670319008928	0.176260645255796
2008229	22	0.0866256710576666	0.176888866592927
2008229	23	0.0855210010990399	0.186588940916184
2008230	0	0.0885947947352905	0.199685944927351
2008230	1	0.0943080019733408	0.209255954334472
2008230	2	0.0968034969845529	0.21500661751555
2008230	3	0.0937573579659266	0.216479348043715
2008230	4	0.0939383436319593	0.220246148065027
2008230	5	0.0942053561684116	0.219240706152943
2008230	6	0.0915020004704399	0.20913655640587
2008230	7	0.0915230224240288	0.2047405059441
2008230	8	0.099490295842527	0.207808866861101
2008230	9	0.119318811624467	0.223837647248063
2008230	10	0.113025326873986	0.197401497317813
2008230	11	0.0930345308160064	0.169349183813406
2008230	12	0.081421496023261	0.15669025405517
2008230	13	0.0777747164309777	0.149064653867254
2008230	14	0.0795045222412667	0.147442517003823
2008230	15	0.0836445878899043	0.154297057293507
2008230	16	0.0831522754942687	0.157213357527398
2008230	17	0.0794055262187064	0.155515137198766
2008230	18	0.0682603083097258	0.152970059410753
2008230	19	0.0589924511800494	0.147578189452822
2008230	20	0.0520295258810232	0.141243091455243
2008230	21	0.0452863041897201	0.134770329020971
2008230	22	0.0440217054309527	0.129326750459449
2008230	23	0.0435290101159146	0.135237247008742
2008231	0	0.0417402768423646	0.132850897200848
2008231	1	0.0409826414888076	0.129136037011873
2008231	2	0.0382334893218937	0.118167939242866
2008231	3	0.0370320608196318	0.111856323380867
2008231	4	0.0382359575744006	0.112607842716889
2008231	5	0.0403117782209204	0.114270460792675
2008231	6	0.0455579165375324	0.118556130847363
2008231	7	0.0543124780635399	0.133189289380654
2008231	8	0.0558834838159269	0.126810805472017
2008231	9	0.0515302133496318	0.110617318007016
2008231	10	0.0510875820000299	0.104298108789023
2008231	11	0.0531582730069831	0.110640590648729
2008231	12	0.0727167552782065	0.136573816401109
2008231	13	0.0903825936564046	0.166503443897496
2008231	14	0.104791913832217	0.178267365295012
2008231	15	0.102459336187265	0.178001174319168
2008231	16	0.0997286920217891	0.177723547112751
2008231	17	0.0965324673278677	0.177124817184432
2008231	18	0.0894036227996033	0.175155485690366
2008231	19	0.0849768740713493	0.173791987360737
2008231	20	0.0820247957101045	0.173261554914057
2008231	21	0.0786083592890127	0.171340272973228
2008231	22	0.0744998858458236	0.167260591377966
2008231	23	0.0682431400075534	0.158063879709219
2008232	0	0.0609361897374998	0.143283409368901
2008232	1	0.0536557088833484	0.125826241861871
2008232	2	0.0448717107257771	0.108329946288751
2008232	3	0.0343377807493259	0.0900466391851838
2008232	4	0.0251360483660101	0.0727693575523392
2008232	5	0.020983371910973	0.063008582048282
2008232	6	0.0210276345901922	0.0589159915593253
2008232	7	0.0297521582769098	0.0715236838614316
2008232	8	0.042365509118925	0.0782056836496681
2008232	9	0.0572394700521386	0.0976948668031765
2008232	10	0.102498043674794	0.194087621031457
2008232	11	0.121771993981585	0.221613985463655
2008232	12	0.110175663697948	0.200271863875509
2008232	13	0.0977092540178992	0.176671304405564
2008232	14	0.0920274077103305	0.158536348776987
2008232	15	0.085298002366175	0.142086615499732
2008232	16	0.0713732372887858	0.121995127762332
2008232	17	0.0606700416846955	0.110631389376214
2008232	18	0.0544927637226942	0.102493209198462
2008232	19	0.0520066421589976	0.0982694007417199
2008232	20	0.0551650295127485	0.115763125694876
2008232	21	0.0867651576230933	0.199859753200367
2008232	22	0.125527255228715	0.302262017697208
2008232	23	0.174312203716592	0.411463402927087
2008233	0	0.264741287379816	0.541781562222347
2008233	1	0.350087408840225	0.632514820536873
2008233	2	0.371796662150826	0.641534132916884
2008233	3	0.37183182538217	0.645173757091827
2008233	4	0.383570301426735	0.662561834697356
2008233	5	0.392848570849277	0.674071360584642
2008233	6	0.366883102289223	0.631635149774308
2008233	7	0.346773829391039	0.605603777086055
2008233	8	0.335290029695366	0.617999405320138
2008233	9	0.394359588957363	0.751112243395376
2008233	10	0.439654583232641	0.799207435931731
2008233	11	0.439266030507017	0.753636400434662
2008233	12	0.421112049740867	0.69116279525951
2008233	13	0.393033362761027	0.630006482727843
2008233	14	0.34257006132868	0.552258064306124
2008233	15	0.281442092031488	0.465709659816327
2008233	16	0.252286671529292	0.408030684413356
2008233	17	0.218809690617871	0.371480584166068
2008233	18	0.175753910797708	0.299044281976923
2008233	19	0.185390381933858	0.326656444267843
2008233	20	0.251062560832308	0.539621428742602
2008233	21	0.295366291273824	0.654050052158068
2008233	22	0.301402770627735	0.665864644808526
2008233	23	0.293091459485984	0.673635330801772
2008234	0	0.316880457570365	0.73808579305401
2008234	1	0.354560384471337	0.818709726205004
2008234	2	0.370425929824554	0.865023571658707
2008234	3	0.389718560416362	0.879283457584949
2008234	4	0.37769371414638	0.842497475904601
2008234	5	0.337245040460744	0.774612473554233
2008234	6	0.333117266618088	0.757768351063325
2008234	7	0.345700277464537	0.765095549466196
2008234	8	0.369295327868705	0.76424817842086
2008234	9	0.377012910486767	0.734362914132877
2008234	10	0.371500756376708	0.727475773140467
2008234	11	0.395518813862639	0.754096418249163
2008234	12	0.404308147585889	0.755009831174761
2008234	13	0.392176754570349	0.733571486039891
2008234	14	0.381417616383535	0.712679330126655
2008234	15	0.366735276857027	0.69524191625647
2008234	16	0.347261885452594	0.678312816095205
2008234	17	0.326688580022652	0.659738719848674
2008234	18	0.306682445752598	0.645687866853998
2008234	19	0.290383673223371	0.630931991269651
2008234	20	0.279177852003708	0.62137328717057
2008234	21	0.274202711217587	0.624521592598587
2008234	22	0.269758788752399	0.633892919628167
2008234	23	0.269687808839113	0.654464992151806
2008235	0	0.277547479131697	0.683547267596607
2008235	1	0.292408989256594	0.714766643823459
2008235	2	0.304761509431629	0.7401182861881
2008235	3	0.303949917735991	0.745018224345875
2008235	4	0.291502533680849	0.73258139263749
2008235	5	0.280170951706523	0.715296862806472
2008235	6	0.273538597244284	0.700237890231872
2008235	7	0.276535554779237	0.686333709306659
2008235	8	0.267178500964752	0.59516790501633
2008235	9	0.230765149859038	0.52088869241414
2008235	10	0.24078274668043	0.5412505664949
2008235	11	0.239237325375384	0.523173815160965
2008235	12	0.244480394877056	0.522535362883297
2008235	13	0.253208340034901	0.531139693538267
2008235	14	0.258679500746286	0.54035904698176
2008235	15	0.255678809045303	0.53786520549892
2008235	16	0.246890128468636	0.530035617570134
2008235	17	0.252480272828449	0.549063275210697
2008235	18	0.257624035502711	0.577404760671876
2008235	19	0.239159385968272	0.586834181183789
2008235	20	0.200437660540713	0.588497151797618
2008235	21	0.161355745939975	0.577301440077793
2008235	22	0.0942948665847273	0.401012040513904
2008235	23	0.0231027767255991	0.109832505924701
2008236	0	0.00682360362850038	0.0329353039551906
2008236	1	0.00429808244998488	0.0212583066886497
2008236	2	0.00418566241674894	0.0218515323006178
2008236	3	0.00763114857547103	0.0336177961699453
2008236	4	0.0142197778351136	0.0520202737560639
2008236	5	0.0181076611759668	0.0565704624286859
2008236	6	0.03804486396046	0.102262238534964
2008236	7	0.0744786342329216	0.193987236670982
2008236	8	0.0888479239574484	0.218256124229149
2008236	9	0.0938682216081297	0.211383969837767
2008236	10	0.0933003785345874	0.198235235724399
2008236	11	0.0862041608888342	0.171761182150453
2008236	12	0.0751840557588465	0.135802797288009
2008236	13	0.0602069577195209	0.127682611741722
2008236	14	0.0698091683707534	0.15574386545586
2008236	15	0.0797743667064995	0.162165156564358
2008236	16	0.064610642974226	0.120489341474431
2008236	17	0.043235121971635	0.0938013280354127
2008236	18	0.0632582981398289	0.126239569831165
2008236	19	0.117216169065511	0.244642114614519
2008236	20	0.176935671674253	0.358816178936894
2008236	21	0.215202255975247	0.43866957546776
2008236	22	0.218632644692987	0.434244722968043
2008236	23	0.166336927308595	0.370496095907043
2008237	0	0.0777943255054693	0.179403898016931
2008237	1	0.0307022094613316	0.0712243203325276
2008237	2	0.0516461043529567	0.116801935480168
2008237	3	0.119646636922454	0.260730076775846
2008237	4	0.110887564096847	0.250938501154748
2008237	5	0.0507932997711543	0.131516330345919
2008237	6	0.0226024907170413	0.0602704388151815
2008237	7	0.0320643116888368	0.0853643111214813
2008237	8	0.0512791911409082	0.135216156950446
2008237	9	0.0746047467934358	0.187648629361157
2008237	10	0.0894536403035161	0.212694286747783
2008237	11	0.0940830573634891	0.216398832979499
2008237	12	0.0879908453854486	0.208117515238382
2008237	13	0.0847481521856674	0.196302842192178
2008237	14	0.0776523287571587	0.178690110507693
2008237	15	0.0726372133019591	0.165192511470094
2008237	16	0.0692370621703335	0.152536788076796
2008237	17	0.0630010188446676	0.140238230392136
2008237	18	0.0572104189768663	0.127099521934357
2008237	19	0.0510521929827721	0.11689586207438
2008237	20	0.0459135433646283	0.11057305692772
2008237	21	0.0397883255443355	0.105278279619196
2008237	22	0.0348198622163149	0.102235314885879
2008237	23	0.0312494890286992	0.100178296201933
2008238	0	0.0287238550265185	0.0968707066328077
2008238	1	0.0269338358317836	0.0926380995835041
2008238	2	0.0251973618924612	0.0884260895721591
2008238	3	0.0239702369226483	0.0848586160985753
2008238	4	0.0227431656557721	0.0821540597712224
2008238	5	0.0221665784912087	0.0803509412873956
2008238	6	0.0227549117067153	0.0798333411376024
2008238	7	0.0235917889029515	0.0776208857121593
2008238	8	0.0227689983999652	0.0735502831061211
2008238	9	0.0212504067786979	0.0687845556321874
2008238	10	0.0205381328679694	0.0660677123553779
2008238	11	0.0215231915359934	0.0674698603728536
2008238	12	0.0215596416874572	0.0684090516767604
2008238	13	0.022451391605039	0.0683009274044224
2008238	14	0.0256985933525379	0.0738429561217717
2008238	15	0.0280781918415622	0.0803398898474012
2008238	16	0.0328646201268129	0.0942004198602586
2008238	17	0.0354967105484192	0.10230101776191
2008238	18	0.0352218839140454	0.103357736797949
2008238	19	0.0358958264901316	0.102341679102983
2008238	20	0.0339310150996121	0.101525595033761
2008238	21	0.0274408732770232	0.0891881582394718
2008238	22	0.0190574597730155	0.0651627295940193
2008238	23	0.0184813459671723	0.0654072191374953
2008239	0	0.0225455323979781	0.0842104461460153
2008239	1	0.029312687268569	0.114438603643857
2008239	2	0.0347913714428806	0.146225359592252
2008239	3	0.0381255372451105	0.174597013933464
2008239	4	0.0397139056364129	0.194930417159164
2008239	5	0.0439313762187037	0.198519359900876
2008239	6	0.0498893904473129	0.198801023554926
2008239	7	0.0560405614609824	0.212981614962007
2008239	8	0.0636298947682443	0.24217782006323
2008239	9	0.0650949077825768	0.255437690676392
2008239	10	0.0680277229253146	0.265648985805175
2008239	11	0.0712611931073884	0.268894130974374
2008239	12	0.0922803263773368	0.295669256094123
2008239	13	0.221512991997969	0.643355928815762
2008239	14	0.296608413315758	0.784920875564148
2008239	15	0.310024552883304	0.790394244204935
2008239	16	0.303719458897776	0.781916987498947
2008239	17	0.303222394484165	0.78047302213467
2008239	18	0.300111882701195	0.799736580914072
2008239	19	0.28285579937388	0.809381449732383
2008239	20	0.259373281127401	0.799871818183443
2008239	21	0.245633675041464	0.778024190462983
2008239	22	0.23179127034412	0.755311257146121
2008239	23	0.226966860273193	0.75217403710338
2008240	0	0.223539986382434	0.748257923375335
2008240	1	0.213975231002929	0.733135070513492
2008240	2	0.206590213278553	0.711405865366003
2008240	3	0.202338676303445	0.69751260313717
2008240	4	0.193159781541981	0.682755297971141
2008240	5	0.18185314192805	0.670273049902281
2008240	6	0.169889803731268	0.660216742102991
2008240	7	0.169039166417195	0.680857307256462
2008240	8	0.170660437375085	0.690470544431072
2008240	9	0.197653619270424	0.700636863336057
2008240	10	0.177735944291694	0.613739804564109
2008240	11	0.160809728786982	0.559301215304105
2008240	12	0.151630403397927	0.522067326939958
2008240	13	0.146044969964381	0.488021527360955
2008240	14	0.142325546123876	0.460120422121915
2008240	15	0.142583354097986	0.436445622157911
2008240	16	0.148619488891321	0.413348830459494
2008240	17	0.170781381295744	0.380379298445583
2008240	18	0.161787939081954	0.329323416688517
2008240	19	0.128641237025375	0.271295775303153
2008240	20	0.10491340180115	0.247039436686993
2008240	21	0.096087832835759	0.254227558466305
2008240	22	0.113497148097515	0.332325198621049
2008240	23	0.130942037337779	0.415457318056913
2008241	0	0.131306275390118	0.4421095426838
2008241	1	0.127410078858265	0.446748138792056
2008241	2	0.124168942385458	0.440647929727554
2008241	3	0.116372014723115	0.414554054043214
2008241	4	0.10349496989026	0.364876048387451
2008241	5	0.0930951439080918	0.325268563399921
2008241	6	0.0823512389464914	0.293155405085622
2008241	7	0.081145336327552	0.294057592470869
2008241	8	0.0808689425178306	0.300270778109089
2008241	9	0.0826252656461084	0.309035728910321
2008241	10	0.0851101415524025	0.310491446143841
2008241	11	0.0922597786847054	0.333429664961276
2008241	12	0.101832641688131	0.364827170200802
2008241	13	0.10894714732526	0.393633421670467
2008241	14	0.119886145064932	0.430951872661949
2008241	15	0.128670062361529	0.463465524116908
2008241	16	0.128059320967571	0.449086796893773
2008241	17	0.122794417682285	0.398724913215736
2008241	18	0.115975159152202	0.369304277224528
2008241	19	0.134353795920534	0.406548543287198
2008241	20	0.159647459932051	0.511727355969338
2008241	21	0.181209018009431	0.554585328962878
2008241	22	0.192727389281966	0.588432232853148
2008241	23	0.179216878544625	0.547261724633414
2008242	0	0.138842168857901	0.435506536299303
2008242	1	0.120795120902135	0.378053815052565
2008242	2	0.117218372448249	0.384517744822548
2008242	3	0.118519073635883	0.40609481721953
2008242	4	0.121601446549975	0.417002539001992
2008242	5	0.11641973692566	0.434736856429632
2008242	6	0.0870087955335292	0.356318827708563
2008242	7	0.0752596265779698	0.296258164526188
2008242	8	0.0888889041739725	0.332872434127342
2008242	9	0.114619453096232	0.358065926836035
2008242	10	0.120454332884863	0.318094166068477
2008242	11	0.0982815379947415	0.236205370785627
2008242	12	0.0910317691168332	0.206053053204231
2008242	13	0.0929521284973027	0.199695209576309
2008242	14	0.121455487513312	0.231454484557244
2008242	15	0.180565193553075	0.328616309501944
2008242	16	0.239011155305665	0.440131931320819
2008242	17	0.258021599013745	0.47509246568516
2008242	18	0.256311115125737	0.482461992702433
2008242	19	0.248897762210327	0.485128783656621
2008242	20	0.246618700159137	0.49310500905415
2008242	21	0.234096485566045	0.495791495515666
2008242	22	0.213181086963608	0.487135021490694
2008242	23	0.191158838167873	0.464788401735235
2008243	0	0.174623784490581	0.449283159327027
2008243	1	0.165994232366407	0.437508457009228
2008243	2	0.152800304810509	0.425807967705542
2008243	3	0.14055162077506	0.413963822927593
2008243	4	0.128860979387997	0.396161810571483
2008243	5	0.123063338857336	0.375777896531641
2008243	6	0.131569116216751	0.377681407647363
2008243	7	0.146498182867599	0.366893262556933
2008243	8	0.156324764698937	0.350089264445873
2008243	9	0.155301414463757	0.33157431032404
2008243	10	0.149510701633088	0.308947651944807
2008243	11	0.140136212901162	0.287060102074969
2008243	12	0.132485892777155	0.270705783519116
2008243	13	0.127502080276893	0.257584067378197
2008243	14	0.12450697318604	0.244855049135433
2008243	15	0.121269252865674	0.232190787817409
2008243	16	0.109822504876914	0.214499908795607
2008243	17	0.0897599562630658	0.189014713498815
2008243	18	0.0675781221943842	0.161787652712594
2008243	19	0.0527930042593883	0.140433794344462
2008243	20	0.0431646251817984	0.121882428308814
2008243	21	0.0365193313554515	0.105350121268444
2008243	22	0.0313640440163932	0.0909329467055885
2008243	23	0.0270629002378146	0.0788579565767185
