# Supplementary material for: A comparison of sea salt emission parameterizations in northwestern Europe using a chemistry transport model setup
Source: Copernicus journal article supplement (doi:10.5194/acp-16-9905-2016), 2016-08-08
Supplement: Supplementary file 2 [file acp-16-9905-2016-supplement.zip › conc/conc.timeseries.values.sum2008.ov14.Na.moreStations.csv]

doy	hour	DE0001R	DE0002R	DE0003R	DE0007R	DE0009R	DE0044R	DK0003R	DK0005R	DK0008R	DK0031R	FI0009R	FI0017R	NO0001R	NO0056R	PL0002R	PL0003R	PL0004R	SE0014R	NL0011R
2008183	0	1.55827878154557	0.0387128649771833	0.0269971682461645	0.0550234051629032	1.10592546871082	0.0487537912765921	1.52862410743104	1.49434286459063	2.03471341349499	1.74700993721886	0.131407581011918	0.273093985809976	0.20670597474144	0.0255452177937565	0.0265950261285315	0.0321133233589206	0.516386619311967	2.33624692585446	0.106737627200651
2008183	1	1.43703165567078	0.0369395272346	0.0253004713741927	0.0529329400931465	1.12171908891242	0.0463974332368543	1.32551312370858	1.34964659891843	1.92453456245867	1.3599587431481	0.0833165253336189	0.263552447611597	0.163504644494756	0.0381415163799132	0.0269290190405269	0.0315206117107722	0.524572427433369	2.12089855127577	0.0925569233371396
2008183	2	1.32375657400223	0.0358286811542185	0.0236870157966619	0.0510526432078385	1.09420534230713	0.0433009459394261	1.03925117974293	1.2610148620435	1.6478282068343	1.20245326608551	0.0689134811540145	0.241601846007966	0.186424614286439	0.0489966365261222	0.0274496617707777	0.0306754096321716	0.595243865623378	2.24343593931154	0.0799759433727444
2008183	3	1.21703455297439	0.0354682140810947	0.0223629283622389	0.0490790646937028	1.06340400011576	0.0406343452379161	0.822618484107017	1.20363229569498	1.31741221950051	1.1195548707155	0.0620021549709632	0.215854047721608	0.228363974176757	0.0522318352946421	0.0279872549773659	0.0299122194788128	0.615868570858538	2.1113563926985	0.0714790621409621
2008183	4	1.10892050080257	0.0354041253511551	0.0214865108128349	0.0472376201580615	1.02710411576459	0.0383411690788567	0.891635329736332	1.1804929258849	1.2105100763352	0.995966171135552	0.0541615472671661	0.180091442788458	0.382361211089541	0.0626532000380884	0.0295402500543755	0.0294423972766541	0.659142194391304	1.80133467380476	0.0648817970260611
2008183	5	0.981662470507908	0.03494626608794	0.023033305639256	0.0443759718879777	0.999658912773188	0.0392845493443641	0.921107358792124	1.19330743495626	1.13245588338629	0.889803433696571	0.0445271719321304	0.198893077808948	0.6522494919755	0.0839699119986522	0.0359776941435733	0.0285252133416367	0.805591213983539	1.4377899020445	0.0735502463445933
2008183	6	0.838032663254247	0.0573372385804941	0.0250857691373318	0.0755375436357933	0.969562077675778	0.0396508764397492	0.876347542763958	1.17872017029653	1.0457175688361	0.832818917781094	0.0510612502684072	0.106145539792876	0.816898173365761	0.0818545792383094	0.0461575021409274	0.0319939501918947	0.935409146178933	1.19005554482488	0.0775227492345339
2008183	7	0.736315733778785	0.0680502525772786	0.0283272198119618	0.141093432741467	0.941721973065135	0.0362675845781359	0.776306208894838	1.14639266622347	0.848859975192942	0.751402753214978	0.0607001345517511	0.0900695569836783	0.675638265288466	0.0448905790184701	0.0626594476757243	0.0420497044457043	0.989091119278666	1.04063801200598	0.0776752543771913
2008183	8	0.681403643583977	0.0728653302584211	0.0251653867370292	0.1682031291642	0.904819753620271	0.042092610286186	0.608849943818335	1.15322618296752	0.760680523678938	0.66510370787354	0.0716352211427704	0.0847239249842826	0.535916988114117	0.0234786931098811	0.0910169902830914	0.0427289848185644	1.02140534567032	0.927955552163074	0.0740585445288121
2008183	9	0.645076461635345	0.0588187667013782	0.0205184656605702	0.139057660188784	0.880754269745708	0.0462999811887905	0.43725963566172	1.13013939217814	0.654979755082302	0.579433877424754	0.075893068695461	0.0673763530603168	0.39536923095599	0.0250802568483478	0.181866577263711	0.0392312677753524	0.965240930436448	0.817204986988627	0.076125140982049
2008183	10	0.621825524511926	0.0504156096992269	0.0151131319041698	0.127462542182121	0.864448406477997	0.043068266169434	0.329294342273522	1.08197709867177	0.545200991865272	0.520614120160487	0.0775163057905335	0.068536455569752	0.307614401309351	0.0499464859869757	0.265746050215873	0.0335121797354926	0.886998704909815	0.694450315364033	0.0769326924062399
2008183	11	0.608014752842185	0.0435371397591118	0.010207814949641	0.117820220044952	0.836764934282861	0.038592662847637	0.26419442818095	1.03891386245637	0.462031051041674	0.468072665397517	0.0802530308520027	0.07661623043619	0.261010378429048	0.0564278517002526	0.301458287830225	0.0304647323459984	0.821952111730686	0.561950105954865	0.0710774031581304
2008183	12	0.609357880127009	0.0346680700410935	0.00813070629743357	0.104775102196294	0.794836251237777	0.0340719328432649	0.20901747937955	1.00523268027571	0.406851203548391	0.43160548380526	0.0793001431908768	0.0764436812666528	0.239167838031118	0.0478750173488259	0.298656201313722	0.0262390100610304	0.756863660710117	0.440964521367217	0.0596644338573482
2008183	13	0.610449708612606	0.0282026760985602	0.00740100559283677	0.0927976433674908	0.751145808219224	0.029528019350957	0.178084365076081	0.965548599755622	0.370487346383042	0.409906678916609	0.0737951519938005	0.0771292336849618	0.221993384985707	0.0352914113134437	0.282964348174232	0.0223656172318655	0.711283784369073	0.364683347177662	0.0495635936449926
2008183	14	0.585484934403133	0.0237546573449933	0.00674117851501877	0.0837777155110628	0.699246323330215	0.0258891104387805	0.156927609255802	0.907558820317766	0.345076070064077	0.391388943392215	0.0621781136976666	0.0776752568798894	0.204371650866141	0.0261275593056634	0.259802804428097	0.0193834517253246	0.662127275541805	0.323272273379389	0.0447456744166759
2008183	15	0.529578028352768	0.0206391999283559	0.00610840091186998	0.0754795416680983	0.644922046801914	0.0229120928184214	0.142309605310029	0.854127155879195	0.325931337284818	0.368541228979533	0.0531759090993402	0.0794815597017055	0.186083108429158	0.0202950363693073	0.241960009447353	0.0170875643267595	0.56971115690175	0.305014231038052	0.0402584132763339
2008183	16	0.533732332643833	0.0185249763127859	0.0056304371469615	0.0657354667141304	0.590460486419093	0.020593956485637	0.133817840446425	0.804585644284548	0.312627110029737	0.334540051680882	0.0464579537755312	0.0818227121533887	0.166701334941142	0.0159920586935718	0.226288694161257	0.0153288861806017	0.478967625431903	0.301795122374454	0.0355154431444319
2008183	17	0.582786022822	0.0171692321298062	0.00510914703282033	0.0605409444798504	0.562030125836833	0.0189482468053357	0.128979303907545	0.735367612416471	0.316392867648114	0.28729247784532	0.0418877597421012	0.0827950425234393	0.146485479565601	0.0128207777293171	0.224864219441928	0.0142373729980587	0.400895816588159	0.308811305409292	0.0310802107419369
2008183	18	0.576878072418919	0.0164534882487954	0.00462066838742321	0.0452505839588242	0.537701582210526	0.0174148918055234	0.133178405361611	0.658331518529186	0.326740299805365	0.251728288497342	0.0390093538254292	0.0814311343730604	0.127546131841325	0.0104981265755003	0.211928930123061	0.0119094421292116	0.346344825810748	0.317770203278756	0.0266943212218168
2008183	19	0.49855998900407	0.0158770035166014	0.00402922656153207	0.0375399020953277	0.53853477566237	0.0156916015084943	0.115179284887564	0.612891658499524	0.337599567537737	0.196697140359879	0.0366189083736176	0.0775211053005339	0.124365503674292	0.0136760869720712	0.121871138416998	0.0104697696325257	0.308099466434953	0.323729288336365	0.0226798349047919
2008183	20	0.366297685511303	0.0150384013497711	0.00365142999170084	0.0385962472554881	0.519882414902114	0.0168228339808062	0.102867849716475	0.597630466852157	0.335260687956007	0.159578567821187	0.0337445926018742	0.0716037843090347	0.127113715267087	0.0254762476198076	0.110309317924052	0.00996978383890739	0.275251654121524	0.328236516385669	0.0181900331507007
2008183	21	0.327473222195793	0.0146509160458876	0.00333775603671307	0.0444749800006298	0.492331941423391	0.0187323365768003	0.124083319366394	0.563942336409104	0.325801159031165	0.139052893931223	0.031103755283156	0.0631787960382956	0.126776823528476	0.0309154453084671	0.103196452532717	0.0100758185842651	0.255545981987091	0.319787785696702	0.013595991424502
2008183	22	0.357879320695289	0.0154966297122866	0.00302939646924283	0.0597089372519988	0.477791885561963	0.0203567153483516	0.187277113238123	0.51939772170364	0.32227652484473	0.127681616074518	0.0290561893494986	0.0529387905426772	0.125664044147448	0.0317081545605165	0.0977779374553616	0.0109291579822234	0.247269199357082	0.302360432840299	0.00957562112662219
2008183	23	0.378539141753012	0.0166813767752227	0.00272590537460684	0.067537492321682	0.484962407522959	0.0218332902132841	0.245408136118714	0.520288788384775	0.319257943969156	0.123074595784062	0.0272766744480555	0.0434253392175516	0.125321372449041	0.0317649093917369	0.0934095393369515	0.0139387651712829	0.252116301472111	0.28669697813534	0.00743112786360533
2008184	0	0.310332848010629	0.0185971391467282	0.00271305654484422	0.073346448790408	0.482638532970283	0.0226540739156954	0.272817306727858	0.484018476684413	0.298320229968281	0.142141972208269	0.0297630493693292	0.0361723639610105	0.126207364743095	0.031745564320468	0.0879522023626046	0.0166546857020569	0.261583683883689	0.288493680835844	0.00692947379643298
2008184	1	0.227050627128059	0.0234812710646988	0.00237984015304661	0.07815309385563	0.479688560401092	0.0225856910427235	0.285745779765312	0.432875512851522	0.26703020010218	0.192190556385969	0.0335416479853962	0.0303456845608302	0.129541807177375	0.0317663056452671	0.0822613840808757	0.0209072834441267	0.269097486041988	0.278897230207603	0.00670413635909463
2008184	2	0.173665299056842	0.03221419218229	0.00206391462094216	0.0794935284168296	0.443211009039476	0.0211944391298185	0.291485800481833	0.397450782173285	0.228310740024342	0.256251362741112	0.0370380524675448	0.02533042361364	0.135168425864009	0.0317843806013976	0.0778490297364689	0.025001463934493	0.272048885491359	0.264530108261078	0.00662412118002087
2008184	3	0.115758280067452	0.0412610804633694	0.00184280343324283	0.0775261947386137	0.471693257054686	0.0191326269084269	0.287036736742041	0.379746768288393	0.183576833843976	0.284578871885174	0.0371211809476274	0.0216066668686813	0.13995588696772	0.0317615445905417	0.0738499918708762	0.0278062731439031	0.264174857492097	0.253081014540666	0.00664707204954925
2008184	4	0.0766013492656029	0.0467493157636452	0.00171737474876255	0.077782614346622	0.437522808697133	0.0175560372772105	0.272396617883589	0.365103726198985	0.134578431565794	0.283264063618788	0.0360422697030994	0.0192049686014959	0.154299618137505	0.03160845281938	0.0702915231641004	0.0289324173455437	0.240906164559542	0.262832806475755	0.00658003909751843
2008184	5	0.0587425639132423	0.0486188814435623	0.0016823389539283	0.0793412245741932	0.452675885899175	0.0162006737797184	0.246286155246771	0.348534533134076	0.0913046399741512	0.32333085471532	0.0337757523256974	0.0159284303132093	0.16766456163172	0.0335441450708052	0.0659671362339659	0.0361595147191762	0.239353998102295	0.233761696714071	0.00652767930258827
2008184	6	0.04453029149987	0.0465475672023758	0.00219462229472708	0.0906868201153997	0.425544109566871	0.0144260288306146	0.212950115259892	0.314740562615389	0.0674077538332693	0.276856107789841	0.031697691461357	0.0142453608198333	0.211962903542805	0.0357437175787693	0.0974078666173243	0.0353898780617913	0.246141431078918	0.187882243223624	0.00761992332513446
2008184	7	0.0386244589012784	0.0402369213085468	0.00313469412352425	0.0966204443031972	0.391658221346694	0.0133514435360114	0.223642996890156	0.281250208416871	0.0552068990082709	0.228332711471221	0.0300802573605429	0.0138815132022235	0.251321629897191	0.0388066569576332	0.113347588979007	0.0238705127615208	0.245371919715285	0.136832066058195	0.0085848428455866
2008184	8	0.0370719540575436	0.0340691691492154	0.00346071273027515	0.0927398156692398	0.34627108110392	0.0132235871616793	0.192365165588171	0.242645682395867	0.0489310276018726	0.159427370494791	0.0289536275503798	0.0151859758880653	0.249344176460669	0.0274681277198535	0.139082269803677	0.019511845914398	0.212101105790449	0.0836787374144441	0.00913133920705447
2008184	9	0.0369065861426822	0.025983034459312	0.00981290054126344	0.0723403821101019	0.291053119063718	0.0150662657855825	0.159547452793852	0.212564269768202	0.0450830489800478	0.102259355541742	0.029908099528147	0.0151748139747452	0.227514036703598	0.0217397255494288	0.131954438050915	0.0179704300206343	0.17360412626463	0.05937110381597	0.0117003795666672
2008184	10	0.0318327222720116	0.0187852159159743	0.0145869912689958	0.0580463110068508	0.263842662275185	0.0150632683162067	0.127119520135806	0.182323143598009	0.0421146123481348	0.0694821676681631	0.0313126579161674	0.0147196303663566	0.212241418232918	0.0206651504167565	0.113003837840401	0.0165165343362299	0.140761586093321	0.0489644391049704	0.0128746265450887
2008184	11	0.0266470674032243	0.0151114333801865	0.0266929992975766	0.0493650397711794	0.267500710817503	0.0140665715881024	0.108458940146585	0.155508260179166	0.0402446611221034	0.0526030463079564	0.0358823099506427	0.0143832580690341	0.19564950094094	0.021990380298464	0.0915887282148883	0.0152677217306074	0.12086977617912	0.0440571878729575	0.0148420507283763
2008184	12	0.02370004224101	0.0129017866924838	0.028837019318798	0.0429148962863574	0.271863286457359	0.0127821683423232	0.09285139474695	0.135449371624115	0.0387083423365772	0.0395250735978441	0.0410934078103266	0.0140304728893312	0.181373189215609	0.0220749417155602	0.0788279633596577	0.0141424702731977	0.112535378564026	0.040591048865988	0.0163845320423177
2008184	13	0.0216707020583154	0.0112612789264908	0.0265853238415849	0.0378770162665113	0.254434748671328	0.0117878500844905	0.0882761160293634	0.122443091903514	0.0366297640847098	0.0357433948433533	0.0504398890843686	0.0138472997223747	0.161448761724344	0.0205393365423678	0.0708168234923086	0.0130582743437274	0.116580098342512	0.0377517656617392	0.0158543028149785
2008184	14	0.020828254254344	0.0103686299206533	0.0258441669189371	0.0333448829830328	0.231522570758267	0.0108816421504765	0.0933100122492691	0.113510558115981	0.0345929886839069	0.0357193516096248	0.0638167841881493	0.0143649643770512	0.146423863265024	0.0178545813182255	0.0649155795705794	0.0122747777778778	0.122323263250809	0.0354358802660407	0.0148257427918841
2008184	15	0.0208269610212582	0.0097460566531362	0.0250032607025371	0.0302175954770515	0.212209105761081	0.0100495250657513	0.108948712134826	0.117170020446136	0.034787161820645	0.0374553081352634	0.0738815149055564	0.0142833508448648	0.127737287644756	0.0154990103140732	0.0601506901058544	0.011628183884697	0.170351719661003	0.033072518613874	0.0141975564092466
2008184	16	0.0260986176684777	0.00941440041856441	0.0240505716030772	0.0286411376991478	0.198026057235154	0.00939252658895642	0.113844473011469	0.136208212356495	0.0341164799318444	0.0402756778174859	0.0750100482308652	0.0135953172309979	0.109832340177987	0.0137076433307779	0.0560534971364846	0.0110970921991113	0.226633197069453	0.0311857209110672	0.0144111303403782
2008184	17	0.0358839974267155	0.00917797366301145	0.0229518888934119	0.0287148459443195	0.153007145887397	0.00893081287851675	0.102606133823478	0.142765940307579	0.0333283863752835	0.0511723583775035	0.0704507936705582	0.0129606844468057	0.0867891137880954	0.0126640419235245	0.0534479829555206	0.0107817101562369	0.239901730178938	0.0299909367676474	0.0196272316699121
2008184	18	0.0534310012988285	0.00889041756881749	0.0213526632404251	0.0286293709284739	0.124321291394782	0.00872345688197407	0.0880772510806959	0.137916307975745	0.0310226573470053	0.0672893696729035	0.0557663614076442	0.0121218521466197	0.0748208446094497	0.0126974357338121	0.0465090650187346	0.0106216559304776	0.21581600584316	0.0293295034593452	0.0373034508907431
2008184	19	0.0723335366466971	0.00815751197620036	0.0187677434367161	0.0260729285351566	0.12254706457145	0.00806853952488838	0.0600445405970173	0.138470371346051	0.0296335614887311	0.0780687578919532	0.0405888730566136	0.0114613345373444	0.0667700287238693	0.012733922293924	0.0400944601628794	0.0109826237734468	0.174151265070833	0.0284380369598222	0.052840645812695
2008184	20	0.093493663273528	0.0070207074381335	0.0151025442658771	0.0271041205664752	0.123901005639796	0.00697438541869618	0.0549709831495702	0.134202013193357	0.0304054973946818	0.072464480177763	0.0308467857615306	0.011203306412054	0.0569123523567245	0.0127980705899203	0.0402144753161632	0.0132621425696494	0.173377054392621	0.0284619342181356	0.0553236438502807
2008184	21	0.102803570191866	0.00663382359662524	0.0120389506851346	0.0292463933788513	0.128662184800825	0.00681709144468819	0.0602676184049186	0.135514462205131	0.0393879161333949	0.0715085122389825	0.0287550908532574	0.0112421000443485	0.0474028292627491	0.0130556964638905	0.039568578295774	0.0184916842277591	0.184013190789219	0.0251126939926633	0.0499167403199499
2008184	22	0.107897503113887	0.00668102917509439	0.0121775689451517	0.0334497512156772	0.130570151677833	0.00710714139043794	0.0627551628859411	0.132044054684474	0.0454840373932118	0.0767387440128311	0.0284558650650836	0.0113305471452849	0.0335085409887049	0.0134297718192507	0.0397632001317101	0.0257097007985589	0.190587965509651	0.0221342408704015	0.0507008637640272
2008184	23	0.108882603660041	0.00789268169417406	0.00969120405274465	0.039442719526835	0.112399423944546	0.00721814101963071	0.0695480087863069	0.126573953266266	0.0496205836203222	0.0808172569581276	0.0282356867176792	0.0109699009371601	0.0219437784136544	0.0138235223774028	0.0364315458471466	0.026584267255905	0.186033866982801	0.0222164873609661	0.0589045788700816
2008185	0	0.099834425136484	0.0101492520987119	0.00743422042422044	0.0421630348762661	0.0962241189599841	0.00726182489590356	0.0716433801629615	0.113342279354956	0.0567823404023971	0.0751664465998033	0.0292232583134035	0.010601582535905	0.0155039216927015	0.0141446077349818	0.0326325806606862	0.0272285942510109	0.177180688971411	0.026472162250852	0.076482392385655
2008185	1	0.087857034452614	0.0121673916500502	0.00585034880559551	0.0417720393589594	0.0827207676687344	0.00737473186027269	0.0738246872855744	0.0914696915412891	0.0748867343157195	0.0769871097974879	0.0357499046908699	0.0103362403606564	0.0132292233485609	0.0143723992310395	0.0301769932185582	0.026562224642643	0.165968400667652	0.0330047855866094	0.0825122885172888
2008185	2	0.0804249770505938	0.0135521013383722	0.00528647453001939	0.0415080458038825	0.0714274935470847	0.0075123499859564	0.0768109987970936	0.0681088637987509	0.110564867990976	0.0903262696204223	0.0483043060065938	0.00826532825245595	0.0126335549124376	0.0144382195021842	0.028446843375707	0.0245447831450767	0.154881611646977	0.0368076453144716	0.0643709885135494
2008185	3	0.06792271361826	0.0142513912117968	0.00605066813905164	0.0435510164058004	0.0678771662691424	0.00777075475507892	0.0833752741734161	0.0550296211692509	0.147567651887617	0.0999326662201576	0.0541854919843914	0.0107240834108761	0.0120245156243964	0.0143258632958125	0.0273884609529142	0.0225907130115334	0.148344472811176	0.0478719990509819	0.0556031332847619
2008185	4	0.0563845441415576	0.0141905405281911	0.00763432940964516	0.0457828879732819	0.0746052307670759	0.00787001643859158	0.0962719327754734	0.0650096957842633	0.173337959678056	0.107685572618317	0.0534946955647628	0.0107359541537464	0.0113016314614323	0.0138651427834703	0.0266460330612191	0.0209298464759977	0.145010097650651	0.0620824079222313	0.0405497279973093
2008185	5	0.0475394914685621	0.0136035787307714	0.0103708999373802	0.0472907897228279	0.0884594296167213	0.00738803082208683	0.124979822364598	0.07974891673539	0.201995324147395	0.117197429399535	0.0428377348044698	0.0130085961585874	0.0101761479808652	0.0204099784683413	0.0271629766877831	0.0196835034299386	0.139679628747797	0.0735852352649689	0.041027074720739
2008185	6	0.048271418020879	0.0127463707279861	0.0137358743330488	0.0472535671330999	0.140151339671667	0.00684510669661688	0.152792984838029	0.114677501136473	0.210927400738299	0.119785317644146	0.0356471873758926	0.0108410768576747	0.00958430285439089	0.0378739288300246	0.0342101306369659	0.0159818698751166	0.127936055101408	0.0738898010668052	0.0391947574137466
2008185	7	0.0614068105363777	0.0109046932086372	0.0140957532664187	0.0469662820926937	0.187271079587084	0.00655344581365276	0.17963657219451	0.159305048789057	0.190583759111776	0.121312648274151	0.0292808651502197	0.0046363210219772	0.0109290383730269	0.0535638498104788	0.0351398586638117	0.0112889574894411	0.10632888297753	0.0585048570349782	0.0227089476445992
2008185	8	0.0661822914903331	0.00905303569844565	0.0140915386051553	0.0426894112804716	0.188759167162015	0.0065053851436679	0.191765823881811	0.199355389052708	0.136412573967613	0.109863083820628	0.0169789676396093	0.000578466682570444	0.0132563407398227	0.0557066597543168	0.0434185276706472	0.00904285581431507	0.095149203980572	0.0441745720242231	0.0110051065615552
2008185	9	0.0720559890123099	0.00824883124632105	0.0139247681432562	0.0365901747599632	0.185975784062724	0.00661571975609086	0.16864242110424	0.234163552696337	0.0866200091891695	0.0950232089685155	0.00629636776040055	0.000118559617438756	0.0151174637692314	0.0527664338473764	0.0431534682581547	0.00797096924918893	0.0916386266020958	0.0336836793851901	0.0176905777209028
2008185	10	0.0911021656461266	0.00770488819689822	0.0120853336606394	0.0283861101893246	0.187315233049118	0.00664002940465066	0.141793262024197	0.23875182374883	0.0631752480107969	0.0900051610162042	0.00654779782505116	0.000233559999962057	0.0146884117923116	0.0602508359185448	0.0418493613813393	0.00718198297366958	0.0949050735356531	0.0294672785396908	0.0352752613865324
2008185	11	0.106614043918282	0.00713826878378128	0.00324515159281392	0.0219072435594562	0.196977814267861	0.00665833634000129	0.126575398911573	0.244183779250534	0.0523862164887571	0.0831341089725054	0.011843784512197	0.000408280356286797	0.0155822931607616	0.0625927102697538	0.0404021894262619	0.0063313200703078	0.106460667320191	0.0286351868495335	0.104532419680562
2008185	12	0.126066231485583	0.0066204853233104	0.000382087939577787	0.0185205839718182	0.228185281042448	0.00657403138276949	0.117043534562603	0.254269658412203	0.0442353619388435	0.0814759907695644	0.0134559776982207	0.000537031710076394	0.0179122801594675	0.0554889400126107	0.0382337423623877	0.00590843141125826	0.111238110392314	0.0284795259968709	0.28254507817178
2008185	13	0.144556840070655	0.00610170203569012	0.000673343468273769	0.0158878044287442	0.279598742519146	0.0064086144575247	0.109727425956082	0.288380093470148	0.0391548324677368	0.0827424906071409	0.00798751310876665	0.000705128139817711	0.0206261465393981	0.0430091130091583	0.0360567475474254	0.00597214493988724	0.111774491240116	0.0277829356982921	0.392963951028158
2008185	14	0.169458993236662	0.00579069765238215	0.00133447587738661	0.0153388393713955	0.319761811528407	0.00625783429830543	0.103615042091908	0.349792420318217	0.0359286605100669	0.0855172215098397	0.00456100423285129	0.000868856405656416	0.0230797184868422	0.0255372693413674	0.0342523906224463	0.00604587881556606	0.102346077281869	0.0259217953620296	0.434766903271601
2008185	15	0.153316442856863	0.00556065933718621	0.000233654495024435	0.0160869405001583	0.354023836925668	0.00610075862435464	0.0997131827019478	0.396973611920287	0.033374272202973	0.0874470115997535	0.00259714375496974	0.000969614091210321	0.0234189804122084	0.016429735377009	0.0327867286328946	0.00608716770667064	0.0862993978821713	0.0221965059999484	0.468548098812159
2008185	16	0.121379151897171	0.00499083826788751	5.32080216852209e-05	0.0183887734212538	0.413874792948979	0.00596513351961571	0.0916063974556825	0.432489177306173	0.0310374575538476	0.0907658609949587	0.00135537526279292	0.00100026296736377	0.0230637815776965	0.0123487539737671	0.031612236810461	0.00610854859770019	0.0732085606081751	0.0150478307051178	0.48945488014778
2008185	17	0.153596324345896	0.00282831817638449	2.85062763067928e-05	0.0222394645819222	0.483768271991802	0.005807206209405	0.0697663727838698	0.470794718580446	0.0285442989611775	0.0908480624212499	0.000991705392463389	0.00100402682749425	0.0221367225749835	0.0105443562506172	0.0307954513723622	0.00598040905705797	0.0604092064169534	0.00919575535888446	0.499956888976731
2008185	18	0.190652741250312	0.000808106771326595	6.65956846488003e-05	0.0241761869372277	0.556849711916534	0.00558425985466952	0.0427666415829144	0.515363127292419	0.0238478476890248	0.0822510951440094	0.000710600927982024	0.00100597249943082	0.0257710992433349	0.00972673255515107	0.0302515692815232	0.00582039296113912	0.057807131182971	0.00804923495622376	0.507107908017913
2008185	19	0.251247774173097	0.000674342038214474	0.000787053684973085	0.0244260555642664	0.571139821968584	0.00535927818441773	0.0359979312283726	0.578483043438756	0.0181649055219526	0.0693216262153213	0.000572543821889792	0.001029123858123	0.0227955195844403	0.00920695425164892	0.0285039695351587	0.00559455911109811	0.046168966330879	0.00940754255014957	0.522929583837222
2008185	20	0.304393851260065	0.00314425947569904	0.00182382868197874	0.0246555161153374	0.561965880277928	0.00494945389013506	0.0372662148204102	0.606951274276785	0.0153367150461381	0.0538071498412928	0.000688908939337426	0.00102404908858349	0.0126078026768411	0.00875637256158887	0.0270154206730877	0.00558600885586086	0.0395054459269842	0.00951703533447147	0.552326175106976
2008185	21	0.272244301174726	0.0191828067813514	0.00856743643422574	0.0238401079441258	0.545438167911473	0.00336163721204965	0.0355009649337639	0.591506879177	0.0145236587362892	0.0452616828915754	0.000872470073124965	0.00100282905773119	0.0151634456161407	0.008443570931162	0.025693410101261	0.00572216507731311	0.0354015296926753	0.0087856005482888	0.600275768601367
2008185	22	0.246778057207866	0.0437086654908467	0.095293523145808	0.0232148969868997	0.50743834009389	0.00241061396555421	0.0306631006135188	0.553444147028259	0.0114296350056034	0.0470036063661528	0.00113916894480886	0.00104785980766174	0.0368291202661598	0.00819410990286179	0.0245207188794374	0.00598062696720283	0.035061935434158	0.00983793140011139	0.645944735618293
2008185	23	0.293116800681559	0.061893359796876	0.16789118427886	0.0246374752266569	0.459769439917417	0.0022691507423328	0.0273874263706342	0.524658978522313	0.0110752390261969	0.0474080179476359	0.00139765300784962	0.00119467764278086	0.0873373845765145	0.00797606895342327	0.023982013806928	0.00644727929835567	0.0348931336317079	0.0109473703537244	0.604543551908646
2008186	0	0.401807658457408	0.049790542373774	0.251737932642094	0.0297492292146095	0.428819064531031	0.00250829749210568	0.0231133485053728	0.517571953148283	0.0109226125137996	0.0459676777403096	0.00165127220021998	0.0014043036895326	0.124090595681815	0.00775094913477996	0.0234289649340188	0.00687324364636269	0.0319088361305406	0.0111498844434641	0.62360006273084
2008186	1	0.47601109925394	0.0398912890301472	0.348677496666937	0.0296044053170519	0.399815685968301	0.00365497916530429	0.0161218352898367	0.500010810558895	0.0102523640742821	0.0379824311092106	0.00184776572575991	0.00169711164980346	0.113197179249683	0.00743747592178703	0.0231150434873508	0.00721945204362041	0.027649594517985	0.010254144113502	0.815203744769413
2008186	2	0.496677996678192	0.0322872764228366	0.369511148483921	0.0251310371018441	0.38015170969265	0.0072053017981341	0.013696436159979	0.46743535176266	0.0114755818179876	0.0329348078784293	0.00159871798559371	0.00251057244593415	0.0840262210918566	0.00705462219672896	0.0228615320917696	0.00760358477803836	0.0247492248467354	0.00649164790862661	0.832983076301312
2008186	3	0.490536919785208	0.0279759548234128	0.368356533633468	0.0207978047141838	0.355201205138164	0.0144970377853256	0.0149266289675336	0.430401728633987	0.0121807587496173	0.0219143480726709	0.00151313178336861	0.00434968963064596	0.0696373911980014	0.00685576437171808	0.0225227364962318	0.0078952040677294	0.0231325119249121	0.00405570058051554	0.802826386520074
2008186	4	0.46581634004711	0.0247707537317325	0.367608933922846	0.0185550705570367	0.325367378508186	0.0227059916538705	0.0146374907033453	0.399956244505655	0.00983344406723614	0.0176748612514717	0.00123599460058696	0.00640925073942541	0.0642076953703127	0.00815342597123062	0.0224214410829929	0.00840828495936354	0.0211040500240771	0.00452570784339884	0.701696607682031
2008186	5	0.423175854893763	0.0215878409298663	0.368301842475933	0.0164087439264003	0.279105962822074	0.0215705426226079	0.0138477433520668	0.368876096427297	0.00908053132045641	0.0169864488221774	0.00109545926118625	0.0078726633682537	0.0487778718942896	0.00869536685915206	0.0227472443723948	0.007677804301115	0.0179504053668971	0.00809593236540771	0.55815868803883
2008186	6	0.361439411999097	0.0166341237199102	0.354990707092058	0.0153609982920698	0.224766001999916	0.0102027364761623	0.0159376779138989	0.357226231246859	0.00808346746408918	0.0175878611008318	0.001396695634133	0.00850852444469757	0.037465670452071	0.00848967434372232	0.0215617058798671	0.00502273347568696	0.014692590099983	0.00632170444075159	0.509788609429059
2008186	7	0.310040002592958	0.0110262767345055	0.337954893498013	0.0149142374663559	0.208582004254996	0.0031696467364169	0.0150453260667257	0.327799774983543	0.00313469149736065	0.0169685206280107	0.00215503161054126	0.00961120697290696	0.0260825680938344	0.0072540781402989	0.0224189716254591	0.00448881592714774	0.0129608102506488	0.00221621607433241	0.51829730736781
2008186	8	0.272090835591861	0.00722343018112058	0.315740496821862	0.0191965428335489	0.184118801060679	0.00180795863476839	0.0127082341977981	0.26851544605932	0.00255197906177976	0.0151303032422804	0.00304864293402577	0.0112293119061713	0.0163569143184684	0.00576203557069409	0.026150351366362	0.00472627713856092	0.0128446400814044	0.0015917700693969	0.524000257182082
2008186	9	0.239626329622558	0.00474618735643498	0.292845374520049	0.0234488526124782	0.166447188268852	0.00120135829475202	0.0103994121208925	0.222411066141063	0.00332704130429875	0.0129969199222409	0.00315011777271462	0.0119112851245939	0.0102478540917711	0.00483192280293779	0.0254960107107682	0.00369446207302278	0.0131680624543904	0.00144167487493417	0.558688029728266
2008186	10	0.213545829565262	0.00344782272619969	0.268307962711521	0.029505271031787	0.148556822284016	0.000769293694514996	0.00779441055318439	0.186472601697645	0.00332252051252454	0.0104363964054569	0.003399827661736	0.011472318433248	0.00676554268568581	0.0039598373397677	0.0246016924694089	0.000596331085368546	0.0137048701887217	0.00144287235124683	0.605955580981125
2008186	11	0.190902928227379	0.0030030755983431	0.243745230797508	0.0310681973860349	0.132691566630365	0.000700966646524994	0.00474189639142459	0.155576074652121	0.00257902328759322	0.00860465441771967	0.00328596089612141	0.0110232723566246	0.0044471369900184	0.00305246457411384	0.0237049573448051	4.47314103824997e-05	0.0193336399771499	0.00142831515355246	0.626825986802707
2008186	12	0.16813996180537	0.00290859427263098	0.216999390971925	0.0267660072957572	0.121038424808329	0.000508664073469443	0.00365002682779298	0.114121975352995	0.0025164054510031	0.00656158088362221	0.00294236070004672	0.0101809903296763	0.00296788963189622	0.00227726534507237	0.0230281179416827	1.76117650473782e-05	0.0409801934477547	0.00135867663567054	0.62754890668424
2008186	13	0.138127409886196	0.00309738737544898	0.188481613796986	0.0221696069708049	0.0935184979460616	0.000377935875008089	0.00369587373797527	0.0607996723916357	0.00240825811691547	0.00423612701743691	0.00293079047766004	0.00857227081692781	0.00232774388788118	0.00182995047143753	0.0224982170473297	2.11265168250785e-05	0.0596002159618154	0.00128722721869248	0.605094810480571
2008186	14	0.100884906322857	0.00359572818838679	0.178937208714058	0.0208682886438757	0.0838474876101236	0.000211578041889612	0.0037395573119942	0.0249181986477573	0.00208103672117049	0.00319680444722582	0.00363217429718122	0.00684347442190371	0.00195518291033942	0.00161340400397717	0.0220313101588726	4.06293448770469e-05	0.0485716354630537	0.00123027032499414	0.510853252110671
2008186	15	0.0701495754241291	0.0040169985193305	0.190751841659638	0.0297444369025158	0.0922915516259287	0.000103260747891254	0.00332141650597123	0.0129000075544112	0.00203098090087534	0.00306349385493889	0.00464397645628972	0.00590928934636764	0.00185776863124683	0.0015095557311522	0.0214063361243587	8.01010731349149e-05	0.0315366070500609	0.00120377637781648	0.46275323240853
2008186	16	0.0505137852095345	0.00518193050244614	0.185181453284589	0.0420334622934825	0.086529607515366	7.76342108778757e-05	0.00296650368854167	0.00889855769499279	0.0020613080694159	0.00310560388278011	0.00516719067379649	0.00548666326335093	0.0018240845626331	0.00143496763239408	0.0207454590700516	0.000108480869224083	0.0281457427785137	0.00118758990204389	0.455322312734347
2008186	17	0.0314595416888413	0.0056118237112245	0.178604248618362	0.046532494711251	0.0573297804065379	4.58076530280573e-05	0.00277632814759175	0.00750612055392008	0.00202195344439981	0.00294935581924593	0.00625953863725858	0.00540925876804179	0.00179378293534316	0.00136623949770578	0.0201014052954006	0.000125067355826041	0.036898657884781	0.00116775639011366	0.46033968306452
2008186	18	0.0133679241577486	0.00691948724251639	0.171461923480218	0.0495957680498271	0.0323007847037539	2.79962437105348e-05	0.00263684232495139	0.00900934823328761	0.00198909456199803	0.00275209195787947	0.00646724849380509	0.00587780753599079	0.0017784132370928	0.00131467040547112	0.0191239138929646	0.000226850120344975	0.0506443126249867	0.00116303599074004	0.469294135308944
2008186	19	0.00506874855820861	0.00952289612347887	0.164967560150563	0.0563447402382403	0.0171978226896422	2.09821124962996e-05	0.00260177868162256	0.0100155238774877	0.00184335039983631	0.00261640781712337	0.00534236624349932	0.00730746320526248	0.00174600670913483	0.00131523824564364	0.0180169619969771	0.00060304416906029	0.0558382110678526	0.00116399764543777	0.479289009294133
2008186	20	0.0043283525112011	0.0149874687453368	0.156776462233226	0.0610143161397321	0.00953629286727783	2.46360855404772e-05	0.00258289570520342	0.00901065621430593	0.00166309725827168	0.0024944131056549	0.00458059687460326	0.00746340902652799	0.00169142016346931	0.00140403803758189	0.0171972797598191	0.00120195620938825	0.0584216765562564	0.00113318977179093	0.485955982835507
2008186	21	0.0059860659798795	0.0166754549872056	0.14386870676517	0.066440365719266	0.00559213120959783	3.58913256652769e-05	0.00257566514632046	0.00628324821740926	0.00154696958410815	0.00239793066680743	0.00429735437179368	0.00692266554804901	0.00163509380636563	0.00185024722185982	0.016856459804634	0.0013355096022012	0.057036226768356	0.00110004620845423	0.470620070278275
2008186	22	0.00524127202332811	0.0195512627066062	0.132589630184928	0.0709729587659962	0.00490178707578156	3.42652501736551e-05	0.00249743005430896	0.00442814103885918	0.0014199710656617	0.00233818669408148	0.00480715311320987	0.00564893183658096	0.00161097399561414	0.00289726185522543	0.0172965558534016	0.000597470253031048	0.0514760075463536	0.00109746973200627	0.4505393676801
2008186	23	0.00526427165579194	0.022059591260572	0.125463440562115	0.0690581548469137	0.00596853264182808	3.91255135163915e-05	0.00228733444852188	0.00333051598855777	0.0012212011431314	0.00227735505351773	0.0158924858840599	0.00427676786973195	0.00161975937676035	0.00411034103616408	0.0185687633329103	0.000426194563581305	0.0453903030266376	0.00111399791087117	0.426662004942453
2008187	0	0.00572332024780288	0.0259012936139238	0.121721138787699	0.0614858713686437	0.00697640635921503	8.12950109336921e-05	0.00203164323488132	0.00267481966423736	0.00111326128749161	0.00214931608328947	0.0258886251759009	0.00515507661998945	0.00162140264991658	0.00496974060925872	0.0193841818884886	0.000383822457312845	0.0445264032001643	0.00111596973730785	0.397703838471361
2008187	1	0.00619828807943968	0.0237320537883603	0.119471180262418	0.0548148364895329	0.00656329706778257	0.000427580358904581	0.00172793677884832	0.00217410996483185	0.00107911764690865	0.00196769557362928	0.045815670571969	0.00450595637597053	0.00162899929701692	0.00526308596626736	0.0195040898716482	0.000451182258841408	0.0465799719579556	0.001152562679593	0.366810081649961
2008187	2	0.00700585760538864	0.0230233590904123	0.116820938097032	0.0499053043187359	0.00531844565139753	0.00164794411400116	0.00141351767666921	0.00201046073154723	0.00106308912360215	0.00180706030818587	0.0640048540977427	0.00293394770256474	0.00159748235279827	0.00512807482223879	0.0192154475795057	0.000531249004178544	0.0487983006619521	0.00152912196639011	0.37312583796677
2008187	3	0.00588204936902104	0.0218195241520748	0.113740180528051	0.0457386862619894	0.00596031380774784	0.00604601352196451	0.00120790095186236	0.00192052324395101	0.00108524438329654	0.00167010723728589	0.0760438565823353	0.00275603152369511	0.00157206875697697	0.00495649643579229	0.0158060499734841	0.00032503283888017	0.0412304612096239	0.00330423685243951	0.340504923057811
2008187	4	0.00510229268040849	0.0196691595242762	0.11058382011557	0.0424929846190601	0.00699503933583797	0.014904330398123	0.0011151641403939	0.00182078967350606	0.00128086189363395	0.00149480159261691	0.0840497804828624	0.00350551315913757	0.00164292013893793	0.00474967783640224	0.00902048086162285	0.000185029696853675	0.0276958668497196	0.00870511373485397	0.317639157560972
2008187	5	0.00546753568534173	0.0172452968730724	0.106486558959861	0.041690624494852	0.0072884387979493	0.0311237032071753	0.00106570043682972	0.00188698981645811	0.00186881971361462	0.0013642657626227	0.0906001988041761	0.00535505602542821	0.00195028850944594	0.00522629937832044	0.00717503756698413	0.000474184968233408	0.010749671084683	0.0128469783088706	0.332333357087464
2008187	6	0.00558003732133039	0.0141904823405641	0.107051108280476	0.03199220286941	0.006999374645106	0.0466729609910019	0.00103444343842682	0.00215000575188896	0.00398671577265726	0.00137078573658134	0.0978893208602894	0.00825551070420579	0.00258672151680954	0.00582367516359103	0.00723778728972371	0.00136038557197172	0.00784169762083564	0.013685349240237	0.321924073656737
2008187	7	0.00380803087708507	0.0118525395813185	0.158167094211264	0.026794720094907	0.0062414733434896	0.0402877654364857	0.00103542289995397	0.00220762816313732	0.00814464343839408	0.00144444240988649	0.0899895529987571	0.00908549401372451	0.00326598254118416	0.00625237652083019	0.00797364832643745	0.00426962331569817	0.00834945385555998	0.0127899875951605	0.258032760031353
2008187	8	0.00297459471270975	0.0117896730679195	0.187354176532302	0.0268593939880193	0.00577799537821522	0.034333542420851	0.00102203541028726	0.00219856729915538	0.0120000736297588	0.00165221267938271	0.076239040308227	0.00821202114434602	0.00378192752396331	0.00656503144867096	0.00877682610462793	0.0092744241238999	0.0106101190838147	0.0113846204864948	0.21824295172394
2008187	9	0.0027560976418098	0.00942824572327187	0.184554776488618	0.025170848174856	0.0050357219252513	0.0322162912497976	0.00102894973051383	0.00226680947245752	0.0136343059469521	0.00176613438081438	0.0630271131656014	0.00710622903828294	0.00414245519722484	0.00710639528859858	0.00962855075454837	0.0122402724121644	0.0134930769193043	0.00978577440652409	0.240458887505349
2008187	10	0.00284196969486188	0.00880407740934973	0.160013928322489	0.0203834904790208	0.00453345633886483	0.0302951547636277	0.00106673238573692	0.00236223461930953	0.0137309424503982	0.00172397572201093	0.0603821602117367	0.00614126157589698	0.0042802640303305	0.00735515129257869	0.00994416841770805	0.0126245442480021	0.0178082722275805	0.00825944661922736	0.286351065570919
2008187	11	0.00327679461756759	0.00744634323848608	0.136844001858585	0.0144659872390107	0.00455096110377018	0.0267799396698144	0.00111413009385643	0.00237992223225842	0.0134120490179979	0.00150224972183965	0.0559736992372683	0.00495483785120388	0.00425004133549342	0.00723275634751996	0.00933465787696899	0.0116761206440549	0.0190359158504168	0.00775803873084782	0.288006940373957
2008187	12	0.00481757866471313	0.00664123633077725	0.121626323398243	0.010459706780753	0.00487188188187976	0.0222059171513694	0.00145268728718246	0.00236209696897769	0.0125938868294848	0.00137155058980461	0.0522273206116875	0.00387018820185214	0.00343751247544059	0.00710800591101635	0.00763959999610951	0.0109453034859605	0.016105173086027	0.00863268830238559	0.298541525866387
2008187	13	0.00664798621670359	0.00633741295307938	0.108482254988132	0.00764974021042985	0.00535401893659158	0.0171184385472498	0.00221946770188484	0.00232326237484671	0.0110267967171528	0.00143966617080728	0.05320098513448	0.00287426583742633	0.00303305703060196	0.00731079465466099	0.00655238957837461	0.0104815869653053	0.0148641406856224	0.0129070383998227	0.282285754057031
2008187	14	0.00728856633788042	0.00626661300393371	0.102029763990306	0.00610396881753203	0.00571736213622138	0.0108773753747648	0.00301319633108526	0.00223306778694028	0.00885911346072416	0.00149346416926166	0.0541048808554111	0.00178755404140303	0.00289083583222723	0.00696876161903221	0.00548353226529747	0.010008178947304	0.0180018180322478	0.0194539631617587	0.179915640619305
2008187	15	0.00637421225279644	0.00772474754991126	0.0972807773581599	0.00517703396876421	0.00578317388396943	0.00781044335808656	0.00454350683498652	0.00217511714069183	0.00815778775032879	0.00155600944090259	0.0553988587654335	0.000861019376578317	0.00260248763981874	0.00644888150184331	0.00406257394333796	0.00935990154133935	0.0365337046592161	0.0240855286420257	0.0609319527066303
2008187	16	0.00443957819156395	0.00871614418884421	0.0952451253425989	0.00441400855826301	0.00559672588536095	0.00657587182417007	0.00619048649819703	0.00214542505040005	0.00998205543180044	0.00168367304779677	0.0557077063799353	0.000476065338101414	0.00201268683969316	0.00576912167672988	0.00155711504743389	0.00774910294101397	0.0850125157696554	0.0270084636087689	0.0292604110847634
2008187	17	0.00323610429901597	0.00924386050533479	0.0974771195883791	0.00398038535442589	0.00522359812362614	0.0057193193638439	0.00727738307791834	0.00216034218064643	0.0144156561094599	0.0019018211852979	0.053976209342337	0.000384726582973571	0.00150993841016042	0.00495678882726526	0.000454317145394012	0.00669545437794068	0.166768365108813	0.0292428557017513	0.0193859357155278
2008187	18	0.00256959010666999	0.00926406610079598	0.103027717729037	0.00374187043101015	0.00448843754569692	0.00501694421054157	0.00750416995735611	0.00237311811500191	0.0171712261286995	0.00190453781734101	0.0485743418860657	0.000431633658005836	0.00129032654517797	0.0040169022833567	0.000334539916866324	0.00632664717149485	0.278732973528075	0.0313119887009199	0.013877159963236
2008187	19	0.00220114523666516	0.00928689904619602	0.107212318026197	0.00336783695523165	0.0038672747805776	0.00448048775298607	0.00716683829435142	0.00245556389074331	0.0165587605743777	0.0016129680096056	0.0418162717727629	0.000597984887461941	0.00123920862323943	0.00325220632492656	0.000381990419082817	0.00699305257384133	0.379476997316251	0.0337562229140008	0.0130062419659375
2008187	20	0.00190919251188901	0.00909223414918546	0.113364314866881	0.0031415988090099	0.00362866996631501	0.00404181288253201	0.00631817392536822	0.00239424924263141	0.0154042846299155	0.00153918438300059	0.0335670926078007	0.000670853137180902	0.00126941249182801	0.00281553989697971	0.000497079208492596	0.0077940357494816	0.420955237833757	0.0361514321042598	0.0138952295100074
2008187	21	0.0017148064710395	0.00877118469067025	0.122887533936098	0.0029845095703581	0.00327500972311342	0.00379024509576385	0.00511802078811904	0.00222678244780385	0.0162792972934615	0.00169912163879511	0.0214884395447426	0.000629232229078344	0.00138037616849393	0.00252753774571738	0.000629418321390177	0.00915698060417113	0.411676190441689	0.038717370366785	0.0145129594012754
2008187	22	0.00161635005628793	0.00889043255729759	0.12664818494319	0.00288453004608318	0.00293394916006631	0.00363608772241557	0.00413231968509175	0.00202260568313707	0.018297260429455	0.00237042724275821	0.0137213639100692	0.000581635433398256	0.00156612116394171	0.00226747011135357	0.000949935620555409	0.00971413611393269	0.403071744957681	0.0415428688565863	0.0153653161310034
2008187	23	0.00158025640017039	0.0094960358729893	0.124576654579551	0.00280322729805149	0.00271923859704881	0.00352906924194447	0.00342762063223317	0.00179957720560612	0.0213916377477058	0.00295892514287354	0.011193651997391	0.000580422849865126	0.00183117463325601	0.00226638270593372	0.00447951948496962	0.00907486695476057	0.403303458095453	0.0454516711762415	0.0164944455134032
2008188	0	0.00158880304645201	0.0102560893032732	0.120418028877753	0.00278091507400403	0.00253297835349562	0.00350882610119154	0.00285449541948496	0.00159993688129438	0.0257049886330535	0.00307786826960478	0.0100676881737892	0.000671434499404473	0.0020760680625262	0.00290498755209094	0.0150191810405244	0.00827903122696815	0.400095327208823	0.0503965631082368	0.0263256480961941
2008188	1	0.00167705870516538	0.0105784758966653	0.117600670591645	0.00270475198526615	0.00234971701548213	0.0035960638765074	0.00281969421879004	0.00143086167235945	0.0304844712778783	0.00296680364391974	0.00916787418571028	0.000784907715010295	0.00265523609975934	0.00516952533717451	0.0346822623271305	0.00738384823349087	0.392474326785279	0.0541017509371813	0.0411436972721078
2008188	2	0.00215233867137338	0.0106500880749394	0.114988172792181	0.00242319549862789	0.002178277728681	0.00363707707116534	0.00231725749219301	0.00134706096338177	0.0327297028378875	0.00300761913627546	0.00861132530450216	0.00087024479805708	0.00345199931221713	0.00616401129661046	0.0726885816123424	0.00683131203090622	0.385189514509588	0.0552503198365847	0.0847492995820749
2008188	3	0.00339238986559234	0.0103941234538234	0.106971424125764	0.00237089820762514	0.0020086767151266	0.00381067011629792	0.00216041673104164	0.00138764886282743	0.0304248613497637	0.00277416889289485	0.00895514308246208	0.000995305517803048	0.00343176173471008	0.00345327984548838	0.157424087629884	0.00635974927079858	0.381639364312303	0.054896001934113	0.199644014036572
2008188	4	0.00555504279513642	0.00975822627334588	0.0783807400469208	0.00289846974626665	0.00184364581012318	0.0043210194316843	0.00231454110050644	0.00183241399722452	0.0254980400925713	0.00241893205758008	0.00910058240298929	0.00105940254462172	0.00346009445502816	0.000467461541065272	0.243098747254696	0.0059233781004591	0.380417704454763	0.0533442388400287	0.210265623119154
2008188	5	0.0142024519600511	0.0182159772179914	0.0724005762351692	0.0051770669962302	0.00177761140432216	0.00649126423578896	0.00325292650774915	0.00368022402134788	0.0207474131997889	0.0016351474452629	0.00890800674814968	0.000671159946804692	0.00388914155089606	0.000133628396878122	0.286594759549667	0.00734661756578082	0.381293754779231	0.0470006290359088	0.23525503563162
2008188	6	0.0483536452526351	0.0530996523218809	0.0694882031992423	0.00770895969026487	0.00186563734342031	0.0116384908195585	0.00377916202748592	0.00571699974712391	0.0158629939433765	0.00155166976583963	0.00703154456725491	0.000136446022943312	0.00461230777127443	0.000110089319908011	0.280462412449722	0.00776523424578156	0.380024241829028	0.0390618756301177	0.319650447991617
2008188	7	0.0805024747382428	0.102571673454995	0.0655946591874234	0.00767859007438697	0.0025040563419993	0.0299844346591218	0.00245532475369005	0.00714311537260813	0.0111471409745929	0.00179009617378686	0.00467702372375884	0.0001213015799278	0.011498323578478	0.000110248072921688	0.246500066606541	0.014142523925896	0.373044315561741	0.0272618415764294	0.333436259111568
2008188	8	0.113383931854213	0.124363576566505	0.0754459766458763	0.0103374010521721	0.0042135363820976	0.0749674880783297	0.00183908261131019	0.00775218771902447	0.00630813341786879	0.00465946163809179	0.00313878985790322	0.00051467311911065	0.0118052569589363	8.79054735042429e-05	0.194543422278274	0.0291826734536354	0.356445266135177	0.014628071339221	0.360144256170567
2008188	9	0.20459402793741	0.14762444923313	0.0975394757533676	0.0169222631601875	0.00613944397586319	0.113540474746976	0.00288607323315807	0.00874814943234807	0.00488386139658785	0.0220045584159387	0.00287967292645161	0.00156625625249457	0.0112670325691874	0.000102636474040712	0.150015293322338	0.0357348636262289	0.314852784972992	0.00755196993794145	0.388282148836831
2008188	10	0.386952221272816	0.106242460972333	0.117203504033007	0.0452029378574471	0.00816572278194647	0.121598017590549	0.0138078176361437	0.0134193473958966	0.00461573993849169	0.0487763745799302	0.00326455566977369	0.00217272268946604	0.0101506265179115	0.000352385249835457	0.122313609608898	0.0407040223783398	0.203026536949756	0.00486259327543857	0.493777112851956
2008188	11	0.59855647747403	0.0609946863860138	0.133563469234963	0.0716426066188249	0.0116378791158849	0.124229695181004	0.0323957396115212	0.039369558938854	0.00426908170695994	0.045146918343862	0.00543429448908729	0.00237869410400785	0.00958243940820066	0.00121196114931678	0.119162186311823	0.0469833380821981	0.0781350078637933	0.00406352321296874	0.56702385860649
2008188	12	0.707149021206625	0.0660246983447415	0.148178289759198	0.088511527314192	0.0174896206044421	0.144623711965167	0.0476026129153618	0.0815256240194072	0.00346831247088725	0.039946060308513	0.00992637031277756	0.00244314493709867	0.00864749247495017	0.00376081067723633	0.108571141867241	0.0595498285720829	0.0275142594115745	0.00382897230859071	0.543982752772136
2008188	13	0.702791584952653	0.13581830188232	0.17054078768008	0.102110071578506	0.0252486150128365	0.141698989632714	0.0358934144648142	0.0947651457083004	0.00310380632699736	0.0619342733121446	0.0141418104962507	0.00246577494119818	0.00610284083030859	0.0079342461211245	0.0983647882375658	0.0712375678172261	0.0146577794839661	0.00313288131446503	0.516017614736506
2008188	14	0.671295018075275	0.167213376039877	0.171649626857784	0.120660019327001	0.0553624768032743	0.132296799234741	0.0307528979619268	0.0951624147705691	0.00792262534615513	0.20847833500123	0.0164091881357102	0.00238196947302735	0.00270139684155383	0.0109458280522313	0.0833611734336244	0.0835975081689537	0.00971794607064308	0.00228940912637815	0.530507272748395
2008188	15	0.60208606038931	0.171515722818642	0.165744757702018	0.106420244679711	0.0924643144306584	0.12109917871223	0.0396704349579258	0.109538419064423	0.0251392557227209	0.428492582616412	0.0176734993623204	0.00227901638960468	0.00118430409674513	0.0134394365582822	0.0651906043378221	0.0930279838911807	0.00732493835522405	0.00285962841504961	0.527138013770246
2008188	16	0.433834479300559	0.172050775739922	0.132290960377351	0.0813205011470436	0.0984580332902653	0.100494158850225	0.116562138303481	0.122594289963316	0.0420410713016953	0.520327507595898	0.018074766999853	0.00206449797931339	0.00151436565709167	0.0177814933680699	0.0541667978274159	0.0976679466162302	0.0062515025417623	0.00452952631460377	0.470582510226077
2008188	17	0.241628849679728	0.177888450183337	0.0969648015593622	0.0646285246581872	0.062999130483983	0.0830806633411422	0.243586495890942	0.134352050697418	0.0449823985834123	0.511887523212653	0.0161073488687549	0.00155261226587354	0.00222634582977657	0.0228268143986661	0.0481052677438657	0.0967535907724839	0.00594193624494655	0.00925367328583207	0.457406434149955
2008188	18	0.196379269350113	0.171478085747303	0.0546548051459682	0.0687303976322572	0.0543048749029468	0.0833568694354982	0.34880660491704	0.157479821342204	0.0415416307589108	0.495389473486316	0.0116008000261959	0.00102000601309448	0.00330239563200854	0.0258579074198868	0.0449295625433817	0.0927598053516152	0.00592835874979811	0.0149319096935381	0.41324467124437
2008188	19	0.20049666267127	0.175254844122758	0.0349351172189903	0.115590275486156	0.068561936822153	0.116604766900749	0.387173489529032	0.190559247169342	0.0357503519133527	0.487498595737349	0.00772326002963141	0.00101241334746962	0.00189046310210265	0.0299236091389646	0.0421963952592751	0.0877737961808912	0.00591430226251104	0.0176199362293206	0.367040175835714
2008188	20	0.210452925233052	0.18754645320417	0.040438049478873	0.162910965185331	0.0983116174189217	0.186274959606274	0.40721385080178	0.173086788002999	0.0347648637781731	0.479949703000558	0.00539457279852995	0.00120166651742351	0.00134298865643805	0.0305104484432486	0.0396140713070036	0.0813877967298402	0.00581170743139791	0.0200279969125284	0.297756716886886
2008188	21	0.220916227378079	0.200879720165767	0.15260908087314	0.173027848888498	0.0994639493782124	0.229214114216928	0.433276256939166	0.141764828855339	0.0434600047806446	0.425794077133173	0.00430120959609207	0.00136239199562428	0.000752176028915121	0.0288005248523675	0.0402507732064875	0.0642017189170119	0.00594347429499411	0.0224085894497387	0.173487254594594
2008188	22	0.267061090554003	0.203167972063786	0.219716217748171	0.177129908689922	0.0958117494525616	0.233637806486478	0.456029215212258	0.135206606467438	0.0979481840149008	0.272824566917014	0.00365776782038219	0.00165451997977059	0.000340237601433204	0.0235114405084245	0.0454372974582702	0.0316508990814866	0.00609912522091	0.0283302011032533	0.15849318195624
2008188	23	0.342520459811912	0.188824005319974	0.293829218861792	0.181443083519352	0.0937411404626508	0.229091507292955	0.429720087190452	0.136125402015907	0.234441988908896	0.29713578675256	0.00318183517670441	0.00210045773504507	0.000127751835192182	0.012127622270956	0.0464913407037083	0.0209767844578152	0.00730919967871783	0.0522482496129844	0.161003441903102
2008189	0	0.377832432571283	0.1678942655787	0.367920276896534	0.186496905303192	0.0987441016125004	0.223898169728095	0.347631533551151	0.130818387620337	0.346354406512436	0.354889728789806	0.00288599494075604	0.00182305153592618	5.75753499741398e-05	0.00560527705181474	0.0432532812565559	0.0152465795731569	0.0115960426564279	0.199459069594429	0.176726902839591
2008189	1	0.387015755268238	0.15888856191049	0.412330688428273	0.193364339972212	0.111983961741815	0.218565430756463	0.264110793507348	0.129165752889542	0.391763337439499	0.355309072679016	0.00286718295897703	0.00163822192135907	3.60560994641056e-05	0.0020544348584087	0.0373197231983693	0.0129243597506457	0.0188417219300239	0.376400032794332	0.179595923455718
2008189	2	0.395867378786677	0.160556601240465	0.423604070635034	0.200184279866717	0.120500586452474	0.210965603023068	0.198648005575693	0.144969755362082	0.404388702293353	0.360030197240521	0.00282298724838829	0.0017835844539806	2.96665847386092e-05	0.000873326972692297	0.03012313864132	0.0123101955145854	0.0356626352843508	0.444133248734233	0.169894255583642
2008189	3	0.412632862733663	0.163087606281749	0.4133889143288	0.204513982434726	0.124645424325577	0.201624199586396	0.161754415239004	0.169556737079676	0.392619777568788	0.379155897764514	0.00276449486763093	0.00274338558726158	4.80728367995253e-05	0.000575421190282853	0.0206284181951381	0.011611236179422	0.0618627329901755	0.445252577224781	0.1947002298356
2008189	4	0.445851535037668	0.163268911636818	0.412955385728443	0.211550936587693	0.130083569814241	0.193610399691092	0.148644838702933	0.241653601902934	0.354379424544185	0.376889583834403	0.00282951607216618	0.0112557730211782	0.000133304827686403	0.000441269339321861	0.0104666123001983	0.00679244678719452	0.0795288491499535	0.434264488201051	0.245013702794071
2008189	5	0.456754587549962	0.163949335554736	0.43533486822302	0.220312520441765	0.14609603037746	0.213128555665814	0.146257347648689	0.27533427271912	0.299428606544719	0.361382912577181	0.0033297397299247	0.0247823940569853	0.00376410594229961	0.000685933322011893	0.00461228225683401	0.00215590471110377	0.11698853519743	0.41466472672628	0.332269175973739
2008189	6	0.284325862250518	0.178589990233016	0.466483185005156	0.208691341883492	0.16014744232855	0.209628999016347	0.292636428042741	0.253363983447854	0.252488379813126	0.354083060248102	0.00403629300268322	0.0392185900099125	0.04467475905194	0.00186487248485176	0.00353409386099852	0.000830690170367953	0.14945878129917	0.390722866308885	0.61401927571249
2008189	7	0.293514890675804	0.21217132326623	0.350577804347881	0.179675542539383	0.163955332955274	0.201649022417459	0.344353817553077	0.219663038174872	0.222660316875085	0.335986241174617	0.00442005255398755	0.0546774799766352	0.0969197776433381	0.00283783380950763	0.00421010216217585	0.000290624325522914	0.159038159355343	0.371704724188342	0.720393164372805
2008189	8	0.383595395284231	0.351793181834598	0.120133200066068	0.206983514851678	0.190902514966854	0.208471649000892	0.345160059891563	0.217677146622909	0.223518754575086	0.336795571777416	0.00432435993278528	0.0579638824815716	0.0926892517155767	0.0029163104657386	0.00369743507165696	0.000318835249614621	0.159894334621609	0.348467040028311	0.732506912856554
2008189	9	0.469864561721441	0.327382868731531	0.20654581947146	0.218914409275961	0.220863134409088	0.251632573651123	0.317329976423409	0.249766481909158	0.260387360965289	0.343225583800793	0.00385411166717515	0.0559939559505195	0.0912009608274745	0.00325777118016464	0.00466021005633149	0.000375676198498826	0.158880788536565	0.302750760085621	0.649444879517821
2008189	10	0.503448275556401	0.223728232980316	0.297799100399459	0.246160063681865	0.221422751227228	0.311747171489683	0.298250651801342	0.262715304642516	0.291253938367487	0.236449248365865	0.00335682253475189	0.050894607991478	0.0888977882580422	0.00461301844251068	0.00940025996575865	0.000286163092822219	0.152893521282987	0.261610109664174	0.531210369559599
2008189	11	0.402247548165304	0.133807798467777	0.30292257096681	0.304245180093651	0.223915446972161	0.292462167340292	0.204864505288408	0.219274016441937	0.286637882299015	0.197966597102692	0.00309817200926493	0.0455087359264138	0.0772831185340149	0.00512764063895556	0.0187490996296851	0.000421378647480059	0.139305931405124	0.258771156648062	0.343698200195058
2008189	12	0.364881509097631	0.109509136877797	0.274205112871249	0.332518159157024	0.232300500584961	0.255504903310905	0.143560824413227	0.210642181057977	0.285113414671906	0.187617762422462	0.00318856791177607	0.039576875788589	0.0712607795152343	0.00530511447103828	0.0262912516101211	0.0014500927996151	0.125407170282501	0.26391248036505	0.225508298138403
2008189	13	0.414479762518312	0.106249823458927	0.24352323761543	0.313158746818177	0.233637852716646	0.246592818908058	0.135689144344236	0.209898153034375	0.298400448243105	0.232488586181018	0.00360480561653067	0.0349993960220298	0.0622206784975992	0.00524532022587543	0.0312168685957538	0.00446507746874512	0.121309105804968	0.273782321776333	0.120870523424705
2008189	14	0.458991806016923	0.112505959942926	0.204897024443462	0.270939023888758	0.242293336069682	0.255509516220238	0.135306666064455	0.202132410047705	0.30075644285053	0.272578240671487	0.00457274426570556	0.0314405160197652	0.0367727833387632	0.00517221354747028	0.0372247753683116	0.0095870927476022	0.119526921269106	0.275849661619761	0.0774865520257495
2008189	15	0.520682307866801	0.122452144747211	0.165669423633087	0.194253612627626	0.270096406489027	0.26411421279477	0.159998056163981	0.194695517631049	0.286680298033951	0.227357311567108	0.0056798408118699	0.027929532423916	0.026517054113137	0.00466655022172873	0.0376809734996366	0.0239076022299527	0.119879881987822	0.280721165789639	0.12601015554354
2008189	16	0.549337136623374	0.120398583820928	0.146889784054262	0.15531985635681	0.274508532282002	0.26667064414444	0.207097586447346	0.163407228174896	0.258829399459197	0.162959166336348	0.008567853358452	0.0250690984333609	0.0217399570320357	0.00419329758079832	0.030317250362804	0.0447086639102606	0.122489151100423	0.281223064442732	0.343734489732178
2008189	17	0.530295436962081	0.136101573066164	0.114223782603113	0.139815404449333	0.244302116688288	0.274205140970089	0.214943445289651	0.125278736467608	0.238555008910785	0.132067962135475	0.0103602028516538	0.0232309980216324	0.0178201493169393	0.00408409726037662	0.0208643231721005	0.0735204227587046	0.127931093543348	0.281109245074144	0.385251791919145
2008189	18	0.446173904167044	0.164499863721901	0.0906881734071376	0.130663894579678	0.163975644006926	0.296546968442425	0.174485542001061	0.116771730766759	0.225433392238289	0.122283086440726	0.0105221063801193	0.0222816960014898	0.0161668980964707	0.00391611223035446	0.0182534899808216	0.104328903498945	0.14604483360596	0.281746827434719	0.333959590891915
2008189	19	0.36731929137687	0.200444840693997	0.0896586725539875	0.127918101949561	0.115670287430446	0.297436624304674	0.104971550667629	0.116596974857632	0.202917861585467	0.166635318871591	0.0102292535520786	0.0215368556935556	0.0200081424183615	0.00368666181358118	0.0182832503256976	0.129723403983676	0.165904564988448	0.272956955618645	0.281906328891843
2008189	20	0.39021194187066	0.191544506212794	0.122266357618276	0.130574468376684	0.102267315060713	0.270032237851099	0.0911783555813513	0.121726683684018	0.184287213207312	0.277061357837446	0.00994129542439685	0.0210508558342353	0.0274090565196894	0.00338578043307724	0.018579741332249	0.140443616359327	0.179374301036557	0.261933031631751	0.238447290573434
2008189	21	0.449880284591038	0.120166389869872	0.189766231250985	0.132257852279742	0.100622229120221	0.220826165962846	0.103172518401573	0.143810490032746	0.181237961641488	0.325312191928646	0.0100561888431085	0.0213058270033098	0.0246187095777058	0.00298841647594105	0.0182609922496779	0.13262158904749	0.185425158723595	0.238732309805962	0.224343281118985
2008189	22	0.432061778204408	0.0538143758203323	0.196963548829081	0.146111731311178	0.105893024109278	0.208941013365183	0.170759916197432	0.16219449590972	0.185561903768974	0.301419445095787	0.010665806628488	0.0220420093008013	0.0219526116192717	0.00268414584824617	0.0176267672370872	0.132997952703258	0.18562472752434	0.213222536722624	0.25451758933383
2008189	23	0.590176251696468	0.0339938670866392	0.156406658229034	0.149723084229685	0.111792382966645	0.175066994953723	0.182228074029724	0.141721232765118	0.186845684907205	0.234670658326597	0.011495935559453	0.0231391624538218	0.0206942015808225	0.00261171597756873	0.0166086957463824	0.204809412027776	0.186306505148382	0.198004834373347	0.265057970963482
2008190	0	0.625436062988652	0.0545604694285037	0.160238411283241	0.114730739582256	0.132296870006852	0.112204094146572	0.137205977766595	0.0937885851672525	0.190244750405837	0.156759493979389	0.0127820929249329	0.0239500450085774	0.0215908028151919	0.0025829263364451	0.0153461678855692	0.267554967847681	0.195042326851777	0.193678517254297	0.273162260580602
2008190	1	0.501568210771763	0.0903382304492967	0.168047672305941	0.0763501509380464	0.176883019301431	0.101615432390987	0.119979049645778	0.0637261596414355	0.172217600673034	0.10690587073263	0.0143979212672671	0.0241726143041151	0.0239563433675076	0.00253463263366786	0.0104768558251927	0.267077750242185	0.188631029617714	0.190488492007625	0.341682943158361
2008190	2	0.408032158683019	0.0985306038508606	0.221820131542891	0.0424853494585434	0.177947915017989	0.0876057921190798	0.106295555882742	0.102377604293329	0.141854138679638	0.0886453265363664	0.0157769029828831	0.0238980237003607	0.0252169404572097	0.00247361511091126	0.0011785775437781	0.242993729009346	0.181577467636323	0.189972403706471	0.415011507064041
2008190	3	0.590207965760471	0.0969687716838732	0.301624262701813	0.0376952354599908	0.0994149530263512	0.085936474209915	0.0923172840497278	0.16471275377243	0.121905773397289	0.133845541710605	0.0171060713388679	0.0234042263304979	0.0272361594567862	0.00239643688294714	0.00218882204541416	0.203379332109191	0.172106792031658	0.188583741309105	0.434918819104131
2008190	4	0.691929471234624	0.0967079643341196	0.339644890865318	0.0669214252955519	0.0577216142981293	0.0760430422801112	0.0898715943697088	0.134659267595208	0.113801048909689	0.17707853209687	0.0183834470788636	0.0222086648507484	0.0312857220979818	0.00224874033921393	0.0183329374133894	0.162662610499929	0.166023284479205	0.180967701254143	0.30663500741562
2008190	5	0.694821789805342	0.101400845660189	0.312271415452464	0.0865964973043413	0.0997290810120584	0.0596480326618229	0.121768425052033	0.120112860325232	0.110487321239332	0.147914640515511	0.0185889305086375	0.0200470231308708	0.0341394218468538	0.00244680841372988	0.0439402879444914	0.140247952912921	0.148576804535748	0.170356611077817	0.287785945751995
2008190	6	0.806418262059146	0.103861153774209	0.336604091660451	0.0776527243999944	0.121222530162318	0.0504898934127977	0.12227873144695	0.144657138118006	0.112656232796647	0.0990308890085767	0.0186037206447692	0.0172724015510312	0.0379683384385722	0.00425703799672076	0.0785348534792568	0.12147609005614	0.11162674778725	0.122796495032567	0.507999487329315
2008190	7	0.959251703829169	0.0937118815081334	0.399075357441169	0.0682722288192169	0.112390647734929	0.0412082589304597	0.0809404771407979	0.15260879288035	0.102975726585904	0.0953908137575996	0.0179353751866584	0.0149215401292286	0.0379614053361851	0.00548395431093407	0.118485846043499	0.0926428900279394	0.109914228360528	0.0956279598291732	0.775537540454005
2008190	8	1.40256016110807	0.0964113720220749	0.476593337829902	0.0958145369725039	0.105037671486663	0.0317622872182123	0.0576807165412917	0.234884041710965	0.103266755103892	0.138099867223456	0.0180015295332783	0.0132975751619772	0.0319404553145938	0.00613530333480133	0.126989219033495	0.0633014526510117	0.122503795070408	0.0799716770480124	0.75266299192917
2008190	9	1.61133595349691	0.135289870801607	0.505151249347256	0.101337099359605	0.105404321286536	0.0470308104921841	0.0557595611900389	0.644789652233098	0.120092146043721	0.176161071730789	0.0182320223012059	0.0112328841276721	0.0278753808929536	0.00571759045734496	0.129673009409457	0.0443106041800283	0.135383140134269	0.0734982146698879	0.723041499047233
2008190	10	1.6522678642525	0.158537522833701	0.540544284205107	0.0820505937414361	0.0791524422301448	0.0829914857044815	0.083748519638917	0.927545664650351	0.118566637821382	0.274544138430778	0.0177640084453634	0.00891980254487749	0.0215918761566884	0.00512533523002678	0.168438132784268	0.030390806532781	0.129320687832775	0.0785385323966678	0.515729897362187
2008190	11	1.49674350007626	0.134631388307897	0.4519169579473	0.0757181605650694	0.113464518022581	0.0821700546062286	0.191906732539219	0.888219992684603	0.105674962129792	0.421261703094207	0.0170092075083047	0.00724317481938635	0.0254413400209714	0.00470964581504773	0.1976885463785	0.0233350102456866	0.0894185294997731	0.0995521147510615	0.239760309042104
2008190	12	1.23528161228398	0.125247296703877	0.320562335426264	0.100044017770413	0.411100415272538	0.0742276301340397	0.384597045983448	0.618401061439525	0.0700685316413676	0.58268505196745	0.0152442266155548	0.00598054677720339	0.0335642930389715	0.00459459582363601	0.218245839496643	0.0250121307614884	0.0525098524203582	0.110986381238458	0.187625482612813
2008190	13	1.26623234772365	0.178963428422763	0.303335501649179	0.135186971551601	0.330366711742374	0.0642983803207218	0.499584063308952	0.407364894973853	0.0437205235830017	0.698138111331635	0.0109056509677201	0.00480425691765166	0.0320077265429138	0.00449331397866556	0.220457680378865	0.0277246113804699	0.0704368033701526	0.107470677798965	0.224340336707232
2008190	14	1.41446727099603	0.257947260111562	0.307311225749196	0.134422397167048	0.185515026013941	0.0643558294803385	0.546256483499114	0.247244871775364	0.0395921110758454	0.786927921257419	0.00797251920307534	0.00374268880021482	0.0260389642972361	0.0041945277566988	0.200667598107508	0.0357776795459365	0.110634447625988	0.0977182647053618	0.246187352922028
2008190	15	1.47622296556576	0.337986741106837	0.359035129673426	0.134686381114387	0.173657844115407	0.0621699849804304	0.555313807415835	0.170159049856091	0.0938672864975192	0.845184053344473	0.00735563296293697	0.00287464299703564	0.0132370266374069	0.00382261370904767	0.144681417765592	0.0428213889263806	0.0984032156854029	0.0747763957178396	0.291830355969613
2008190	16	1.44099479198304	0.39245038593506	0.588957199709924	0.130831290756374	0.163722123514629	0.0409033608664536	0.55446703405368	0.282827936329294	0.271406037302235	0.884448769424036	0.00729879770068407	0.00244037138692635	0.00491197560133721	0.00345493142880953	0.0984913570902937	0.0444217866026092	0.0865991823088544	0.0506135274017594	0.318847436442935
2008190	17	1.1635748989145	0.45357579514815	0.667573460583798	0.123865052069399	0.1861492618197	0.0192120616461396	0.565095913467788	0.385886135401447	0.384750201071286	0.874619077725478	0.00715282183644052	0.00203108876847897	0.00820398969070818	0.00308400070972068	0.0754236256894882	0.0450251023965506	0.0781815858619205	0.0392987643865931	0.379211355885757
2008190	18	1.1552897058247	0.478456568104594	0.625687221348929	0.213924548468006	0.326439375518004	0.104885242824303	0.612185359503743	0.400998789573053	0.403866179578438	0.829072635098694	0.00687728670889099	0.00143769220806094	0.0105734919735137	0.00273673757736053	0.0535473823241845	0.0410034742003014	0.0716712602519136	0.0372338932383052	0.49745060740041
2008190	19	1.29544707129297	0.222087292736617	0.650081508845361	0.325336578517991	0.395390140058093	0.168145378917965	0.615589108519508	0.615862867330632	0.404711688475005	0.75623547789485	0.00645652112996007	0.00150811461965927	0.0132801813148694	0.00247102680619302	0.0299114456824136	0.0311101443186373	0.193975280976342	0.0518148263356618	0.639841513522144
2008190	20	1.27884968108075	0.0672312662208056	0.690206310201266	0.391729231665783	0.298290246102171	0.155437411922919	0.613610971992669	0.819993478579399	0.442400704096115	0.70589381381694	0.00602627465863515	0.00248886657189431	0.0146885821890868	0.00221290029316791	0.0192099807824021	0.00936536534568692	0.412171136360699	0.127183356081792	0.733890886587081
2008190	21	1.01158910730835	0.058077477688113	0.680313700166721	0.444096471769852	0.213963944364577	0.176257402290567	0.670261580696596	0.744110927283443	0.532695169002493	0.661188457117587	0.00565212670030863	0.00395683239011111	0.0145978282667872	0.00194596690343802	0.0150423905952981	0.0203364979478346	0.325386980089379	0.272883555601722	0.749869036687032
2008190	22	0.811188024256174	0.046249881673361	0.678395617279466	0.384840952552481	0.508814334103652	0.278113830955016	0.661065605853312	0.510185203833771	0.627460229348156	0.659399728486037	0.00527745947554109	0.00477974948554743	0.0170933329622101	0.00175860458908843	0.0123295569151648	0.210537246344476	0.174925560296394	0.360769289865742	0.67260809563444
2008190	23	0.821068438922406	0.0537978932939756	0.696426443261369	0.0930871085692877	0.459820246764064	0.218804476772324	0.635285355906752	0.259210440821543	0.683302139221541	0.721149000712789	0.00488926405674959	0.00455570338590607	0.0131336577132633	0.00160338277569272	0.0103092014363234	0.383063808508562	0.145869624115475	0.419115960995145	0.609517234889449
2008191	0	0.899828272013514	0.0770294490005242	0.735896672783853	0.0481508880784638	0.210641425761929	0.122369277240965	0.685352096932016	0.200436102466	0.671660711329695	0.780965099637173	0.0043839866852203	0.00450512307877945	0.00808794491474431	0.00143768761484771	0.00955752495667961	0.410826830314373	0.138767489623216	0.486865226843014	0.555139316992869
2008191	1	0.897931441540809	0.0984476558046771	0.750347292948714	0.0437659500861116	0.138142801511152	0.11347418625323	0.866149998104368	0.179866427298135	0.626922815867352	0.822359435556635	0.00391017035423906	0.00537484254612352	0.00476033726009015	0.0012772336348504	0.019299981984728	0.235217237530415	0.128511879451032	0.573604734124312	0.57430739616591
2008191	2	0.766985861304947	0.211190701656579	0.746461659900263	0.0431654571815077	0.141314495883077	0.0845747474692707	0.854421248986212	0.176227969378634	0.565502565019448	0.851011927266191	0.00354267657276129	0.00665258269858121	0.00336518449334504	0.00114917175642109	0.0306624188303871	0.177555627568218	0.174331509862	0.613769417368291	0.640669563308613
2008191	3	0.495719231511653	0.526119530433773	0.746428111208655	0.0632037728876666	0.153096713970682	0.0766093588759644	0.796223612190633	0.2012606870009	0.54733732801711	0.84962251318681	0.00333919431150881	0.00726772903947581	0.00348154965570968	0.00103338421970437	0.0384165822243371	0.320715455194079	0.348382483271943	0.578683223181512	0.768087309016157
2008191	4	0.45473135291536	0.563218514009045	0.764869515016249	0.101487253736263	0.14464353455159	0.140020879407557	0.744269693068649	0.275367913030733	0.544568293397261	0.835876515680043	0.00318109534062053	0.00621088148576286	0.00405394854450022	0.000953381433772411	0.0434919210217866	0.328172395178818	0.482852200763953	0.559311297473203	0.990443786184161
2008191	5	0.622576860619125	0.565618237259859	0.799531823927244	0.230224046562305	0.158339486818479	0.325504570075252	0.684745575385069	0.3874024337696	0.538377246134356	0.835056629943487	0.00299188000324021	0.00526356221538124	0.00474874000459647	0.00101451660782167	0.0459293342674762	0.152445450279628	0.671370388064684	0.577022855446324	1.15343428114863
2008191	6	0.697880147803107	0.599369213449347	0.843659952557201	0.411343938013059	0.1402751768712	0.551720559645169	0.84937794386697	0.454722794415205	0.548077786956438	0.901885606093708	0.00265692946185403	0.0047747554411382	0.00711640517964283	0.00102413505522587	0.0435035495795618	0.119613970213446	0.656594021507266	0.608454070329007	1.12158449121248
2008191	7	0.63249182532315	0.511968662214396	0.843487549172422	0.393201102608721	0.17604819789005	0.677236438231956	0.963016682130763	0.516778382775824	0.572634832956525	0.917143746684367	0.00225634633483619	0.00401131862056209	0.0120301121569918	0.00107151413506356	0.0381749610923744	0.107124593662285	0.501070088426515	0.634946206331011	1.03247163155843
2008191	8	0.538927937750597	0.47686212627582	0.746600303615545	0.314331972331901	0.309581769230187	0.718938329760452	0.722549068481563	0.535866395884937	0.598363595629466	0.762180468675352	0.00203880733572615	0.00285547526507049	0.0184091587251034	0.000972796167581733	0.0317816340618945	0.113822213483859	0.384797087042064	0.631258858987058	0.943550444984134
2008191	9	0.486631989387293	0.489212964218765	0.674583519152434	0.303244009871058	0.421186541023247	0.686679002873507	0.594977182216575	0.479410768107703	0.621843823373073	0.596549840391712	0.0020842116070486	0.00216747664787643	0.0296764410440222	0.00101884587673331	0.0121868732587059	0.220690722135835	0.371421913613287	0.607834097036234	0.859703780497435
2008191	10	0.484194110789977	0.547918472443818	0.596244376911765	0.336393141958066	0.445074779799993	0.63006998140656	0.528245783704124	0.387124842972784	0.63978510046315	0.5148023592015	0.00249667415528444	0.00189786342559587	0.0395016548219876	0.00103273947604368	0.0187968601393285	0.295386071173565	0.314175301398281	0.601388458579979	0.723617105510504
2008191	11	0.461728818271484	0.555563741548573	0.488019702611963	0.311372473172714	0.418377080150409	0.530923847381389	0.480567383120286	0.149571021372786	0.64226758292945	0.466252826768431	0.00302554310056477	0.00170695508817843	0.042618955983257	0.000995796318624943	0.117168220057788	0.326363111535072	0.306867912536994	0.602441974468307	0.501872684154296
2008191	12	0.429873107743493	0.477957171837542	0.409393808051301	0.256064389418387	0.394117301252055	0.453913873676198	0.444825818317061	0.0772155369746554	0.622686541092493	0.438719220499895	0.0029790742757204	0.00144539157682602	0.0365568188355796	0.00100739063776298	0.156202617853063	0.358423300882071	0.370421543188686	0.601135796857203	0.188568543778715
2008191	13	0.384474700469786	0.397032191276484	0.357105376594789	0.0680365687928544	0.357509267983853	0.433736391967757	0.410173189038741	0.091095590224018	0.592836780858002	0.414710574029178	0.00257683230482297	0.00133604924745901	0.0365780006651982	0.00098907708578086	0.1346596946501	0.369507773796293	0.430802873004636	0.593593536221463	0.0534986669681136
2008191	14	0.377224826889486	0.355589740058681	0.323700412914181	0.033313587190819	0.211893294757207	0.422425297849757	0.37375041286679	0.0977286832363378	0.560627979672024	0.412519596769534	0.00194720107781362	0.00146576351063877	0.0362796465266254	0.000979406823819295	0.07881228162332	0.399629326168078	0.404982290066559	0.582427441899258	0.0295784595598286
2008191	15	0.428272932592986	0.331930809843928	0.296502891327579	0.153598584317492	0.129059425012179	0.415103257091459	0.34345892856624	0.0944862892329619	0.539837446662649	0.417959441805916	0.00146125935814879	0.00152248765619291	0.034819283196518	0.000937894820784721	0.0582451887058392	0.41052588376293	0.398401681095618	0.568275909779627	0.0137937240527757
2008191	16	0.550327513931767	0.295323806102175	0.282529395390622	0.369047295881384	0.141235992061996	0.385893754472913	0.322004022616598	0.0949383562783736	0.523448011817869	0.434747235472912	0.00122600085619559	0.00159858985050083	0.0296718229631676	0.000865491594857747	0.0517153475166479	0.390527441979509	0.411226958613626	0.563603021676444	0.000917077732844619
2008191	17	0.7741704255098	0.247075619869743	0.276361251673672	0.335114772842661	0.193671648084858	0.345458746758195	0.309348370440873	0.102678183345919	0.511556717599145	0.456749832294122	0.00108861116621902	0.00169398379640654	0.022588246903576	0.000832604612154146	0.0481277012974838	0.373600614855865	0.406489980960559	0.551004555679434	0.000372111792008876
2008191	18	0.951607889082161	0.201343505547723	0.26927986219146	0.234644087210414	0.244982014256059	0.320452955420355	0.300681598539664	0.179233681673029	0.496713728004116	0.482521278530301	0.00101563550189702	0.00175400468815498	0.0196396001889045	0.00106022995509872	0.0397344991490859	0.376559608884989	0.386768361721205	0.529015432344456	0.0109125988692184
2008191	19	0.993592724192733	0.18551431020154	0.25262413082651	0.187831395978626	0.288297737009211	0.311917099327005	0.310872701984005	0.265430675327251	0.483296911528695	0.504836001409864	0.000978389368171988	0.00152039421030563	0.0232246430828902	0.00208461349558392	0.0361934989572637	0.406417599085311	0.365571463505913	0.506118293945865	0.0495092275674653
2008191	20	0.973618817474836	0.187343420192057	0.234943576703667	0.247913415358673	0.281375450847115	0.262482898467604	0.351416876318277	0.257923590811759	0.466686474883163	0.523779733257067	0.00101798638129932	0.000994776072798698	0.0371833418579728	0.00465181586267165	0.0633708243005933	0.418949322353941	0.343917035808188	0.475244394708497	0.0333627569015711
2008191	21	0.903855478116451	0.205852127263192	0.218518934309266	0.259996840945043	0.228757211161003	0.0564120474321434	0.374938353479121	0.229976374631517	0.450319859209962	0.521439283119686	0.00122714806942011	0.000474462556937961	0.0378614156112356	0.00865976279250022	0.136330787019157	0.42011506045188	0.324160607327246	0.443169196978737	0.00818238286544318
2008191	22	0.795702734426397	0.246441273358983	0.204291466758433	0.255397882810929	0.223163097483989	0.0361349729195886	0.40257591819101	0.236631788767331	0.426276886327712	0.498663526086481	0.00171247712325285	0.000340882706948793	0.0386268110002905	0.0125230261982423	0.240884684925459	0.343712329004373	0.306219071541385	0.409574032498823	0.188418748300571
2008191	23	0.661298781782345	0.169865425046275	0.191060277741644	0.2891074175288	0.245998105521708	0.0389890829380091	0.426492962232979	0.302943751636478	0.359589978944547	0.473518152929603	0.00250771502659789	0.00071564863776429	0.04059632052308	0.0147894252018721	0.325331733124152	0.134343047854984	0.289936536011482	0.359536284886747	0.684791955057788
2008192	0	0.52414515678178	0.0381110153969605	0.182281030357346	0.373244814830558	0.241234018710646	0.062119884934215	0.427797268628605	0.375095439588221	0.234884489805268	0.448785388977157	0.00303269822537512	0.00535891337243175	0.0427905226310024	0.0159073435694467	0.328321409369697	0.0724890824491891	0.263701226513479	0.291287062919355	0.469661347456975
2008192	1	0.401845771091784	0.00697165255869881	0.176768709617492	0.408007222447982	0.2415974209637	0.0858770071376865	0.434696640488553	0.481369870890546	0.120720137018565	0.421594714186309	0.00292166196423136	0.0195348502176983	0.0442757716292469	0.0162871812503361	0.254583423902097	0.0654476727906487	0.216920116455055	0.218531892333666	0.308283583989813
2008192	2	0.367457801043907	0.00190936378793423	0.170171597390688	0.350090071180742	0.252384603283402	0.0940181614803631	0.430818559484691	0.639032826623795	0.0817684516313918	0.408440072989164	0.00288892982729978	0.0290005102263667	0.0455370213774141	0.0162702972054789	0.0939704498195505	0.0733655007440467	0.176853480352933	0.161934024648351	0.28277175614265
2008192	3	0.591718642992348	0.00291624707442128	0.161987399239467	0.239211116822376	0.247920564441066	0.0824254338119754	0.421705923960355	0.696607940337595	0.0844305676662514	0.416570906375212	0.00292559326220043	0.0329982268915448	0.0466584080882056	0.0159278823674531	0.0261132221545612	0.101824606194914	0.161994039963403	0.112653684197251	0.271666874759985
2008192	4	0.611227641521102	0.0205926915158866	0.156376890397019	0.183519786079532	0.247617868632658	0.164315248809543	0.439590943174767	0.663717602581173	0.162264074733367	0.466413783384904	0.002776471408603	0.0373854443485572	0.0478559706864372	0.0151042228216929	0.0304503215275343	0.12539679399984	0.171285987293009	0.073082206370202	0.27159252664717
2008192	5	0.0618733029008244	0.0293825811535361	0.208573468691768	0.149075632351873	0.307606165704703	0.373995916925788	0.486385374191909	0.573347280075546	0.240659316787801	0.5724372454916	0.00237665414358852	0.0362011825652616	0.0502002845118187	0.0171158027887365	0.0435025160300657	0.142101360974178	0.20191718274019	0.0755023283963431	0.279396127655647
2008192	6	0.07262989227657	0.00657843804409286	0.259476086349548	0.112744120196772	0.493828228902291	0.351768036031864	0.610180386612066	0.450003128731809	0.292097074281628	0.5607725866321	0.0021847483423624	0.0307155276808499	0.05816891715109	0.0293416598908994	0.0760831000008992	0.146397702207338	0.225661446541287	0.106850882965781	0.363471108984241
2008192	7	0.121533701807876	0.00167994797927681	0.34171304344867	0.159396751738581	0.582240765105107	0.300692570951057	0.586708950132388	0.304475741897886	0.333506705440748	0.435941150439097	0.00190060097517015	0.0181899897244464	0.063135738068421	0.04852341996765	0.065938527267867	0.0727442429505307	0.237850704752357	0.160147190235748	0.128908225152337
2008192	8	0.614179300575511	0.0672566601982241	0.41479542871742	0.100449941731241	0.551336059343967	0.254487453139986	0.473453835341077	0.0405510800375323	0.361226621423158	0.378301678900941	0.00124075364668904	0.00779641271486172	0.0753692711161219	0.0419515912422633	0.045729673364432	0.0155468436739228	0.237527423466481	0.235937193743749	0.043885859137244
2008192	9	0.89429281306503	0.203689764366413	0.355453636165472	0.0368909485243972	0.383858531353855	0.237509085134009	0.406046942478348	0.00480199899333691	0.376032711521938	0.338972679255194	0.000727035643719564	0.00395311591881142	0.0767324616312981	0.0380820317425034	0.0320370674164222	0.00561146465814853	0.238438720416155	0.293953644793723	0.00493836729297633
2008192	10	0.821868576279834	0.228834917972387	0.323029130134888	0.022631073488814	0.117642148363435	0.267542972946451	0.354913099003446	0.0252197118931361	0.399800086787677	0.259889857268499	0.0007527364958581	0.00277843270802169	0.0557961544950091	0.0367816874100917	0.0269507158798714	0.00545768096661991	0.240639788542396	0.318239760217429	0.00521035519414431
2008192	11	0.836306233927608	0.244172914524862	0.274960160478746	0.0206371503696497	0.01425078266113	0.294056713200878	0.215857763774128	0.0604244111282105	0.467127956777602	0.112786038008481	0.00219224449391227	0.00229778338642258	0.0432394706266598	0.0364920142467781	0.0255852849885863	0.0164257928334196	0.243995535557687	0.336605401498721	0.0142583494311485
2008192	12	0.873544096903127	0.230759098479909	0.224674198928116	0.0316209720086399	0.00783985031635247	0.30920712146999	0.0587359125471974	0.0679906195713123	0.477521420000841	0.0524193517373302	0.00770547128370536	0.00169701946052087	0.0383600287388485	0.0374549755835512	0.0210622879840711	0.0646194066803565	0.240714752897442	0.378032665441495	0.0249086214030684
2008192	13	0.841419669472593	0.219221604818703	0.182353228375075	0.0492338398244293	0.00552855138622161	0.330527576674304	0.0406041453571605	0.191708801712064	0.447292344782663	0.0605851719870676	0.0139552117661524	0.00213793650995562	0.0418865115535887	0.0357867828928155	0.0175721598725467	0.115468509209934	0.23429183117477	0.4377026667613	0.036592228206145
2008192	14	0.794784994265178	0.23178803815687	0.156709678856145	0.0853336279021818	0.00937805998412257	0.297738713286786	0.0737942133851189	0.186989377202639	0.275807241076211	0.12859251878649	0.0167722569175475	0.00348909606929361	0.0552574444300643	0.0324611843328462	0.0164404007071206	0.136566630628121	0.227442866941534	0.45307301177573	0.104199804707583
2008192	15	0.656353818834554	0.236818163592773	0.141758820921922	0.187047637149696	0.0480893091166582	0.284280515792834	0.135436758415831	0.0627998286522452	0.040787040229993	0.203500369414524	0.0162928677497985	0.0041582686883877	0.0775121922164472	0.026901237806449	0.0209034009978889	0.139897405193385	0.221383337029566	0.440240319098328	0.201150051876634
2008192	16	0.479288654340153	0.187804912384462	0.134682727451443	0.211396327285254	0.133785004002671	0.279891056188766	0.23452280408863	0.0237168774860496	0.0212308405203417	0.25033853441135	0.0141102031026851	0.00413984112549847	0.112422574628187	0.0210874846648533	0.0261595863949101	0.177297108094165	0.21646036805522	0.381446781651479	0.227266498275794
2008192	17	0.45226343182526	0.159325506837798	0.131205260938977	0.207151096405932	0.0907788404287013	0.276470060375565	0.268960325636094	0.0446781729451089	0.0529095675052198	0.286879725328063	0.0114486515357588	0.00390031349599486	0.155179814100889	0.0183368673543804	0.0265085443217718	0.193295897497043	0.211518079527416	0.211827112981629	0.226050321993657
2008192	18	0.498912931098686	0.0333445589219994	0.131107480650619	0.222393400975005	0.014785181983762	0.273520132228861	0.223913826570431	0.166910333262504	0.120408042188047	0.294075751360016	0.00839007306544756	0.00321246740047643	0.183985981302237	0.0170852918374351	0.0251491818336918	0.189859768526757	0.206226656650008	0.0579498644487896	0.237958987607556
2008192	19	0.612152279887589	0.0524940325915534	0.125373693835462	0.229044625350846	0.013310716469152	0.269181142274795	0.203536231377173	0.286300206236179	0.243200929247255	0.386317236304605	0.00559071870288677	0.00240409442789348	0.195940429462934	0.021138736908915	0.0231483835381902	0.177939497830319	0.197223198569806	0.0604867182109393	0.259434147656959
2008192	20	0.753006763512361	0.108025155766625	0.114731745170647	0.210125568397119	0.0256279145613896	0.260765385314775	0.273788194810932	0.313552022534584	0.234742507262801	0.550302302489906	0.00465487322783306	0.00263937085434885	0.199647800278217	0.0571732970068394	0.0210662495475776	0.166270121756969	0.185673326135056	0.119620514217805	0.279088796845416
2008192	21	0.859027009157257	0.104265195557519	0.104782732155524	0.0749921155914273	0.0433247239180544	0.250313672365637	0.311589648172367	0.276913147059246	0.223841046006503	0.755708249187161	0.0065129483805501	0.00553685633787439	0.193437777819255	0.120422279704392	0.0200234188981736	0.158407399825656	0.167899320268894	0.192529252834702	0.287368564994569
2008192	22	0.920698940836754	0.0294984358323429	0.0979493707294981	0.0409722971014009	0.0922175337148336	0.240461961424688	0.446467736213299	0.24376607207795	0.25352276401087	0.81378374408663	0.0168062770619228	0.0113087775852729	0.175999590788804	0.185207469378364	0.0196890779367066	0.161622072169377	0.104334969304951	0.16630077672638	0.343910983412258
2008192	23	0.945489743630856	0.00978076470044119	0.0955150650249931	0.0664988275077875	0.144123382650248	0.232307302511104	0.599870242798466	0.241356953535295	0.300312033595754	0.786485550109199	0.0377338427798531	0.0174198385549216	0.242030100080918	0.230520443069622	0.0239809827512604	0.17627119772409	0.0392483655346498	0.104418781021811	0.492841240923353
2008193	0	0.955707681977465	0.0317531681218661	0.0878117695826477	0.111147101672535	0.150528703109056	0.22145530682245	0.661523345573948	0.265658526504985	0.312944279601049	0.758019388464447	0.0601470525427165	0.0233634144204278	0.497881794500303	0.243966191624059	0.0257584792330927	0.205673871533442	0.0236904827371733	0.148861170539864	0.571344590985044
2008193	1	0.954272116902304	0.0807995181701548	0.0814916341260935	0.108759052169379	0.125336982237008	0.203823025235747	0.685014723072894	0.288434228634894	0.376531638026474	0.754609973198045	0.0774723122609248	0.0244123776192141	0.528583458592625	0.24968088262969	0.0277871140461303	0.219099491024784	0.068780808633046	0.281779269667459	0.543172749749224
2008193	2	0.939076373565694	0.144661970784238	0.0742308234309146	0.0987647501440025	0.0577803012491731	0.189494591043875	0.693670564651912	0.289846966512898	0.523208108148967	0.767462871531132	0.104685386023616	0.0234135872970617	0.504313463293694	0.251971517692414	0.0300574368769886	0.227371823430748	0.173901071080395	0.38460812237769	0.45328907347397
2008193	3	0.911556785022752	0.0335526779678398	0.0673547766489736	0.128704014610246	0.0113161612556786	0.172661596747962	0.700176327696488	0.274211446540978	0.566991714454298	0.768902533973318	0.137534039177487	0.0206755961978305	0.647779579564812	0.243055245722165	0.0317843039406314	0.232115265608135	0.185133463551361	0.561617617040876	0.342379862359225
2008193	4	0.873734048419188	0.0080094169010732	0.061758502276852	0.148540098129078	0.0129746892537048	0.166583398024046	0.698937136380482	0.249129536680869	0.589381466793557	0.814520760367885	0.153076754233946	0.018595550031509	0.759701511660017	0.21628961031305	0.0370461021599252	0.234739414754327	0.183289592395934	0.652351052232283	0.24509765962202
2008193	5	0.865485741989704	0.0664190040349596	0.0567822995298075	0.155285453068135	0.0312503075712014	0.160720619355096	0.726762305668934	0.213157550312006	0.630885913207553	0.819384707538764	0.160180674014322	0.0177258505045754	0.65919846571038	0.209100071049791	0.0377189610723764	0.23491615576214	0.177777520591194	0.638925099981549	0.226195293500364
2008193	6	0.843450669768796	0.101892840679294	0.0509381159643466	0.191826358441032	0.00787038391660086	0.158028470521566	0.700728019063879	0.167470326022464	0.659658231719801	0.724142038246369	0.199314312208525	0.0176338415333333	0.423750762064644	0.106302256371408	0.0387555353003537	0.191900589395258	0.134759333137441	0.624182106950983	0.209800945288895
2008193	7	0.82021549561903	0.100268814110029	0.0541934390149123	0.228691144945281	0.000943445479105438	0.149569306514655	0.608679210275013	0.144935156322679	0.67285902604227	0.56104240068038	0.251805934056575	0.0188242021594079	0.300593704078373	0.00459518789324011	0.0399492975476576	0.177287289313212	0.0846830962969036	0.649198966627129	0.219328294548224
2008193	8	0.811559785651575	0.127498180414406	0.0605296517314065	0.208419006337643	0.015029914136816	0.139058926124298	0.49032046447558	0.158022664399677	0.676489776069915	0.349869996869538	0.268587726525357	0.019367045962534	0.214161317059761	0.0029590404952252	0.0622134852441781	0.167945824083279	0.0439934640861546	0.674269702918276	0.250464013071282
2008193	9	0.853183803175422	0.148719205919362	0.0797391063633327	0.133779866122596	0.0737126173620654	0.128364693666493	0.37211122448526	0.218877654289436	0.634883819064768	0.272381382256321	0.189105913793453	0.0178931875063739	0.198022033781174	0.0418922388391428	0.0880845091112207	0.157635371842573	0.0283087352932481	0.693662950747312	0.289932637282888
2008193	10	0.777505748693454	0.140364208490929	0.0861939264587256	0.109839669936492	0.122213651691725	0.118069447772768	0.219797778181594	0.308865803329981	0.539117353730504	0.386668611691693	0.201849970901739	0.0143247326509618	0.213240475381074	0.143824538656941	0.0811373727940369	0.147556335398618	0.0469898598349643	0.69524499431646	0.334997417389077
2008193	11	0.67680964056968	0.126126272026321	0.0851662988718202	0.0943614670979903	0.149342156390026	0.110858229470814	0.132741824697756	0.385596566490086	0.454456028137851	0.707213587627427	0.469209184737564	0.0090933290833782	0.216342665530771	0.217361619125427	0.0552955615229078	0.134992764543718	0.100540101492901	0.687354368126079	0.381465601724072
2008193	12	0.567973077514047	0.115869071035233	0.0782696718484077	0.0880122005608535	0.16617377401513	0.0926767049807602	0.235147436631697	0.423206174500651	0.390457874708529	0.796471470134378	0.456676770196166	0.00731179775255912	0.222043205533297	0.239941461665196	0.0486741873067159	0.129070260768795	0.150893982840936	0.671082646178316	0.3497282195537
2008193	13	0.661725244640403	0.0996947356374493	0.071322929853806	0.0817579340370513	0.181487488109405	0.0741223676094682	0.43716941838154	0.400149056751322	0.32026672688797	0.77980127178251	0.258015527128327	0.012576139621659	0.210068615338039	0.213773207758378	0.049942097781041	0.123271741275887	0.188101973479286	0.624391566925594	0.298863875645135
2008193	14	0.931457567198689	0.0631528169570991	0.0579940413087059	0.0768636770784502	0.192715165639571	0.0648406880998463	0.407556808826439	0.363930953273957	0.235389737103437	0.70280812655842	0.355989154917265	0.0277741293232213	0.187400911581577	0.168217828814684	0.0545202810920626	0.114232316010298	0.203481404330131	0.52849227218934	0.261104204275449
2008193	15	1.04977207409061	0.0477729027495334	0.0488776126770278	0.069420982680893	0.188565235098432	0.0617677038988508	0.297951754465767	0.31639450749364	0.147122025020996	0.769902076241609	0.402871963974865	0.0315221321899872	0.134419727156379	0.1051293894489	0.0654939977199516	0.107291496347783	0.177591846251946	0.302758463205646	0.255568271684303
2008193	16	1.03793244565523	0.0618745618873759	0.0447498830351509	0.0608914387863911	0.168453158280621	0.0608583256691883	0.333320251156686	0.212736438558476	0.183350306796945	0.843997247976648	0.424725413962204	0.0182434296681851	0.187089796381784	0.0769819911406643	0.0792030171894292	0.10301033788818	0.126957883434305	0.125757547688386	0.244499329047544
2008193	17	1.15310800080528	0.0667193906680615	0.0422081361541611	0.0528007584593088	0.141715487626458	0.0604533007790819	0.462680611230283	0.131260082877463	0.26716160473176	0.902929091161927	0.432932018721619	0.0117535758970234	0.516574845399661	0.0810352022184049	0.0912214146102913	0.0999318234077828	0.113947000657788	0.21198484410809	0.23187828326918
2008193	18	1.20392076795422	0.0730086688055495	0.0389102365159866	0.0490708111890731	0.121369408280662	0.0593957485198709	0.543669851818148	0.125573327554314	0.252479693682859	0.907136786804233	0.447024941172329	0.0104888515179044	0.823355600763276	0.142597502009678	0.103011956666123	0.0957888128795829	0.115120640279991	0.357699214092623	0.241324188277224
2008193	19	1.12071985567696	0.0763910689003775	0.0369786049501245	0.0513605473262295	0.0983301356988558	0.0559860502338998	0.603370397869779	0.125948307908892	0.226356205499558	1.07277851646425	0.455610554839393	0.0104430306737582	0.833882602628952	0.141906884177244	0.10718911317374	0.0920344088399293	0.112785325100731	0.289864594415128	0.280602363523108
2008193	20	0.831740545804464	0.0720376367857249	0.0349648693832093	0.0525097851551929	0.0732653657756373	0.0497763453425349	0.679786156097197	0.129483094935759	0.218352455901637	1.36570074981146	0.446099360595861	0.0169838030568457	0.835503189364555	0.111821290710499	0.10408335122677	0.0886253590806211	0.105563862672352	0.229796404458294	0.336949578405683
2008193	21	0.559505917189117	0.0606914546824079	0.00955995864987912	0.0493499885954206	0.0748164848179434	0.0350420792638256	0.805798240949865	0.120257237089292	0.246361207641728	1.50970037880345	0.382662394935998	0.0576160606092978	0.740927168014239	0.0808251283050904	0.0962180445633919	0.0900678589630769	0.0952675512536297	0.227005045163689	0.298596788849382
2008193	22	0.61469742326296	0.0380715423726531	0.00149268858628888	0.0424932793173404	0.0934399838751723	0.0241490962078112	0.941152146498428	0.0893755983285063	0.376684510820955	1.54316564244217	0.298742871280813	0.103851638627693	0.522435607417563	0.0699738586602024	0.0963582811117454	0.0878186828519557	0.087221181222028	0.337747791526434	0.255438681031415
2008193	23	0.806579837631949	0.044649425141155	0.000930354893776127	0.0309636182464562	0.0923925367351105	0.0261351888450839	0.936556432864692	0.112929874728749	0.503223315015966	1.54813376151442	0.212023635923087	0.105858053948435	0.491372214972896	0.0858950170698924	0.0975022151781609	0.0846112031672754	0.0828990180289547	0.525121792479973	0.217216789871414
2008194	0	0.833335692808055	0.0713301562468364	0.00342538485885432	0.0237937987013911	0.0819564809842712	0.0191077045614119	0.77247171953783	0.193398373454766	0.529162680334302	1.49286126359242	0.117064104037588	0.0918802522399249	0.617654862891673	0.264695325494708	0.0980412968903666	0.0734538890518628	0.0802224418407325	0.58523122798587	0.123720801380317
2008194	1	0.829458401449563	0.103738868233203	0.00569464616576805	0.0231518873858851	0.0756036188417766	0.0236260306481411	0.424804746068573	0.192061662173357	0.486050322993023	1.41767441340679	0.0898081608058696	0.020949795762202	0.678061818545465	0.566869423840548	0.103309359828141	0.0655964272557986	0.082675924269367	0.598369708781448	0.0927493392146294
2008194	2	0.94563224579927	0.123014717173992	0.00868516544528545	0.0278461505562195	0.06731903486492	0.0319320717163501	0.340294831780947	0.176826337550926	0.443875557428739	1.49303826451351	0.0900330533326697	0.00324422088786966	0.522104594734361	0.633087938447373	0.095468921076403	0.0627834210088165	0.0772962654263596	0.608017777104507	0.190618450086155
2008194	3	0.925175883206105	0.146403531637488	0.0164577060031369	0.0400191222937923	0.0523665177389033	0.0319658582215257	0.554649136124545	0.16803925040561	0.390111460510194	1.44721539643183	0.0989185649157997	0.000124079521356823	0.341528293370037	0.65388347834512	0.0833659626612805	0.0604882724595199	0.057144290895645	0.580097160074567	0.363284332465918
2008194	4	0.821232216988953	0.170464334313067	0.0308933078257843	0.0581464496602876	0.00993915613906751	0.0302254127819431	0.761133565512665	0.190068599349221	0.267560638329878	1.34093718725295	0.108977403142197	0.000132528648143282	0.267751622618762	0.654055877500505	0.0729214281581179	0.0559782990956564	0.0369344155236251	0.508044618414498	0.357609320092362
2008194	5	0.746363989904326	0.145934750470086	0.0689261643172139	0.0721874570815553	0.00830214514999584	0.0302232243479711	0.529895029334598	0.320860675881639	0.17615952547676	1.15273836187727	0.109747649175414	0.000233046540190118	0.204647842034179	0.6326615412424	0.0656751130248517	0.050824680331961	0.0254585490689326	0.377732603417785	0.223144756659887
2008194	6	0.707819772969881	0.142483704682382	0.134633683049425	0.0761717062338955	0.0317784636055872	0.0282021105822165	0.470026875291303	0.406190643914809	0.17301134435497	0.846348276324174	0.0978721521243761	0.0014115159700019	0.145945792054193	0.593245031386968	0.0651436273488778	0.0489131739190492	0.0162949455429274	0.233047219604964	0.134823119218429
2008194	7	0.631658838620836	0.129975049690041	0.219821436630655	0.0753066196876327	0.13063631053603	0.0243780318412406	0.621129126260955	0.393334446643101	0.250322515874632	0.653750780176922	0.0885488071756063	0.0149998935769383	0.0991230062197757	0.5704818552661	0.0628542654997125	0.0413886399788542	0.0169638034310978	0.184827366081733	0.185713931403804
2008194	8	0.614152493231504	0.126099256475062	0.26800114014069	0.0738669115631843	0.271587193277498	0.0235999076427965	0.55909014380336	0.306289676558394	0.356920164059374	0.526729712560038	0.0929731774751267	0.0427180857271519	0.0675972525774535	0.538056294888775	0.061732573128789	0.0455993327074819	0.0230492649371162	0.221752903894477	0.64872022177046
2008194	9	0.761427596913072	0.127434791923903	0.283343349042643	0.0645223107979277	0.278923893560409	0.0250603829750549	0.456128181054922	0.204370690337915	0.370861751999425	0.323011111326345	0.100188473541174	0.0321928072665583	0.0787593713757756	0.483062172843649	0.0634974986249673	0.0459897531623749	0.0263500298704201	0.408772144576941	0.818756451532758
2008194	10	0.881436645796024	0.103452476473204	0.25885547983229	0.0520722921349927	0.236174675539578	0.0253350326759974	0.333705987837056	0.144212584802339	0.347871387666578	0.155115647805672	0.116244543268211	0.0142655803912397	0.281939889054528	0.422407791858917	0.0643760960785761	0.0387577733124062	0.0269749480561331	0.578721471353115	0.782767058275327
2008194	11	1.21817365148266	0.0978785546435401	0.240934962481258	0.0435027922443355	0.198436807860906	0.0341915418135725	0.132156599662385	0.126314449614254	0.393143019794943	0.174275985017616	0.148609135441649	0.0174997250838544	0.665466536899988	0.308050364771652	0.0632591078306192	0.0258439565046846	0.0268551606688561	0.602348981668782	0.733263254723601
2008194	12	1.13782643726047	0.134688446599623	0.232453388138259	0.0495910880104341	0.165045860733402	0.0574213407160136	0.0889177763792662	0.157405268685082	0.4250487130341	0.286289828081347	0.183845073809574	0.0410730319972502	0.877147737832539	0.13680600477898	0.0616527392351648	0.0115585169934534	0.0303844660834806	0.439977041973864	0.587248100894615
2008194	13	1.29077361251653	0.187396235120645	0.234287206379904	0.0781911263553023	0.121911539948476	0.0773201143619863	0.0923491623395517	0.167461564549558	0.400961613853477	0.440189225162069	0.204379696390635	0.0482065667173552	0.807098543267562	0.0495843590852337	0.0591962213185969	0.00432547674629446	0.0359077469494765	0.427994951901671	0.365139989102934
2008194	14	2.0574139784258	0.197351824030084	0.238350083385457	0.0852122749872312	0.0784632187662654	0.0864366130743525	0.20168921248725	0.185981153901599	0.232028832959519	0.630499282517111	0.207525770573416	0.0392405970104497	0.680163197667756	0.0395300058787262	0.0565549431561104	0.00330486253601254	0.040886517251235	0.438904539268506	0.191292969539261
2008194	15	2.55564607227585	0.167859521401822	0.243465045852847	0.0895155832343188	0.0789587013274573	0.0915890040322795	0.413165972262575	0.353845849919503	0.208675113111932	0.456071621072336	0.202055148050017	0.0376928352903957	0.576734296288638	0.0572754097091251	0.0546743035086553	0.00286424070498953	0.0446904958452008	0.356302338755756	0.114819524936689
2008194	16	2.47941592337363	0.0858492651766509	0.243999647825753	0.100461536714435	0.109229192432666	0.099821981060124	0.361318673029822	0.740220996032676	0.27250646795223	0.611758061751416	0.184045108543177	0.0624688026149554	0.490913114693631	0.103996808536443	0.053083726875743	0.00199740561090509	0.0443133917841856	0.236540906036906	0.070459018511991
2008194	17	2.24289281381342	0.0178607441288386	0.240920283444135	0.147734683650499	0.109021641997294	0.125947373072076	0.65065278496131	0.971562738264423	0.515987838699917	1.15837471073717	0.155689300010114	0.0939446809798072	0.416795017459573	0.102401922766815	0.0520566183365335	0.00139270746135267	0.037457994949825	0.2567682766048	0.0560161875552209
2008194	18	2.07939618659956	0.0209274000151463	0.232140237748965	0.178513649324455	0.084555264270062	0.18632472414495	1.03285356503442	1.14210871815346	0.647597879064311	1.7436363084395	0.126894434289433	0.124849483281725	0.261544511088489	0.090374196265553	0.0507183773732402	0.00116155972097223	0.0319676166486178	0.398590672118436	0.0701289675233881
2008194	19	1.99449008863766	0.0760212552377478	0.22108058356971	0.177626937085997	0.0856923067680845	0.252148017620582	1.22708278522167	1.306139348355	0.785286038138408	1.95578734432155	0.103006004900594	0.140657871241092	0.105308471052361	0.237175741688749	0.0478588540211028	0.00116929722613093	0.0321627812563081	0.548696969727243	0.0769547458451239
2008194	20	1.85820224406133	0.120321225417408	0.206801616412765	0.114642981858489	0.190210751052848	0.27079785047736	1.21569444744335	1.29425217372859	1.04363900832814	1.93564936998732	0.0789402294259549	0.150324557757158	0.0761123600809502	0.462127406743593	0.0429187909445123	0.00180273743332879	0.0349315135083198	0.60835579824991	0.0720731795744913
2008194	21	1.64892814656787	0.143510242626027	0.190449898750005	0.0377933055823213	0.27763826159961	0.274194900892945	1.16309409852669	1.20352813009213	1.25336449176767	1.74636226763986	0.0641178535643625	0.155787852707248	0.114243268369554	0.595780790183309	0.0384667868749064	0.00657263158853155	0.0347544007152037	0.860868108335064	0.0450776033967986
2008194	22	1.18226311493611	0.158389454052958	0.175849619680134	0.0332333604916399	0.31658667695452	0.273859948914479	1.12182870081761	1.01620434300812	1.30379320966479	1.48799467697119	0.0546132035650677	0.157640206521213	0.175589762180988	0.68911420780681	0.0344942582220313	0.0254829070036208	0.031621160838294	1.11472719439129	0.0330014090933347
2008194	23	1.09963323198535	0.15604614727223	0.162122759530327	0.0346549433427442	0.296945616221054	0.26165461597448	1.07639993690008	0.769344608734513	1.18964078048167	1.22607741857988	0.0525703266835526	0.153615175713901	0.194922561514396	0.699835526189925	0.0314050967209385	0.0436850158653334	0.0266935502542618	1.19436652411571	0.0256298697383183
2008195	0	1.09761499572573	0.145013963993555	0.156765917426296	0.0369196972991546	0.241971300829594	0.209037726345698	0.979945498693126	0.524976935505201	1.11814989871504	1.06448636684343	0.0494647761178637	0.143038511977512	0.192959735257092	0.673689645932166	0.0290899866232374	0.0497019538365227	0.0228882342680166	1.16694591268297	0.0227358011824218
2008195	1	0.886795486148822	0.127303392009269	0.164510957145272	0.0416763290943434	0.189123266571792	0.151814231140811	0.866858109944018	0.332937728014055	1.08552113338873	1.05016430395902	0.0495348146901753	0.129763987612119	0.2824529198802	0.611953486334552	0.0275963433317648	0.0249449828217402	0.0237654340467525	1.10537429141006	0.0232204958698118
2008195	2	0.821900870914787	0.113322907404944	0.173144776436236	0.0484390307155614	0.156539474932959	0.112219000070992	0.728129635839229	0.201434943131035	1.03748812882532	0.99982307030457	0.0554231107597052	0.119812056932241	0.43551303421069	0.562976494664892	0.029339227694273	0.012630744547868	0.0253091230838737	1.07944395816298	0.032201074425808
2008195	3	0.829885360580868	0.10213879020422	0.192710124127898	0.0559711989853959	0.139929525685037	0.0972103449861459	0.635925698707841	0.140782369833049	1.00022215288334	0.877979060895566	0.0805912691580013	0.10960390672196	0.622498513565708	0.515934508093898	0.0295344307775414	0.0178257817565092	0.0333507320971703	1.05526370712309	0.0396931126844147
2008195	4	0.811712995476327	0.093843697033716	0.209007039896374	0.0676805012965976	0.126367639684731	0.10003252217009	0.5686820550299	0.103150361851683	0.938412426333153	0.789951323587588	0.130274235663193	0.0932688847377632	0.709595189444565	0.290424366479356	0.0307913211724692	0.0328886548334653	0.0618024791402121	0.985993559400991	0.0382483649060842
2008195	5	0.79725732394058	0.0909355827884496	0.199464919759846	0.0930131025032369	0.118066681705495	0.0915709182242862	0.517337408842945	0.0682991425735255	0.753226930884313	0.73300954194546	0.181973364981114	0.0716075419128892	0.79817667883523	0.118425003788967	0.0304515023924505	0.0606746578056892	0.0864504877684251	0.899408221561563	0.0305851072321284
2008195	6	0.805511318798506	0.0899507208043032	0.254385269086093	0.116470839578107	0.116303716984036	0.0736318908903832	0.515784393697709	0.055456476895173	0.723671428574915	0.825880054815954	0.203054209872905	0.0556182388329915	0.79890071846564	0.109290506011316	0.0300727391591072	0.0756237023945062	0.111692818326383	0.858267169568581	0.0308452602973873
2008195	7	0.839699904963412	0.083349710093073	0.254880259386411	0.114554197847182	0.118885274133635	0.11928400791216	0.471526651583485	0.0512948245072707	0.464939257229429	0.955624325277153	0.17714368893957	0.0493329425377246	0.739130617606802	0.154757782752783	0.0290543362282445	0.0702123488872101	0.148927477293619	0.905946629855971	0.0508689052305829
2008195	8	0.894154570166719	0.0786752649933801	0.342090038425808	0.107676078265299	0.107028088835187	0.176962905062265	0.440588475115769	0.0490756401952544	0.393548433198	1.05249225829017	0.13672710460089	0.0465507009562878	0.63670444751915	0.239019783709668	0.0298497343158299	0.0372746892901453	0.186973134847037	0.815585864433406	0.0669777560900998
2008195	9	0.925865251238779	0.0727661900004559	0.379409249177421	0.103143070012499	0.0925991234849263	0.199428175053737	0.475025000634241	0.0432926896682254	0.466840890010286	1.03162627401421	0.135649931895214	0.0461791330442063	0.548235285790152	0.314184755167908	0.0330975333774888	0.00341936578861126	0.211761529509268	0.645832238093965	0.066781861631371
2008195	10	0.957519695313123	0.060677954479292	0.382334941327965	0.100647835763519	0.0724289474995392	0.20285591705524	0.495160437778576	0.0309531121554918	0.479434376016378	0.881341798010827	0.130519453222003	0.0478718230080944	0.461296431702098	0.30547207179972	0.0358707898936676	9.88055633093021e-05	0.231190119775428	0.615074866494235	0.0740615151925129
2008195	11	0.965424115330426	0.0477008169957905	0.326338497138104	0.0997095849806436	0.0558462380181912	0.188440673957444	0.531052266943286	0.0227092692338097	0.425382182539379	0.699493633171302	0.119142264692629	0.0513499991686846	0.389413072994247	0.246553938097924	0.0380743146864587	7.81374842547853e-05	0.24680423072904	0.582471338029759	0.092304807831534
2008195	12	0.878822247026204	0.0358341929047272	0.266006251574499	0.0973851342840848	0.0459929623601565	0.183363960980467	0.556349596769814	0.0199994990709101	0.346321081356051	0.511698854817899	0.109759572231482	0.0554685155806412	0.319831870081945	0.200344242870247	0.0375011537238301	0.000332086305080225	0.259469239914216	0.532458680997109	0.108817898509837
2008195	13	0.640955488977351	0.0268433932525869	0.209244914041652	0.0925358709877304	0.0389056587995999	0.187105969617431	0.516493435227782	0.0188809843980217	0.292865595842912	0.392765152126706	0.117290559731898	0.0628270260746659	0.290134053355735	0.143116676942279	0.0364463395876888	0.00248431019554151	0.271235936611445	0.51765752768445	0.0974750913160622
2008195	14	0.262977837426659	0.0218641785031637	0.174990672834966	0.0862925301460284	0.0331280371644354	0.193111103315775	0.431884066721177	0.0215064348758505	0.286159014780625	0.375236779654835	0.138153344979441	0.0656171952172859	0.270855174954982	0.104405983322622	0.0385463200191505	0.0169690358017741	0.278676600867384	0.448389331772744	0.0864753732304038
2008195	15	0.213336112047771	0.0179790709499476	0.149236420726861	0.0831410424478018	0.0282088559835546	0.179512224673696	0.337258475039326	0.0318787375306984	0.285905312495386	0.296388651011505	0.170812937101088	0.0650165313126612	0.254264694755185	0.114572301920947	0.0430937937516368	0.0557517873307972	0.273954499101646	0.401182745778773	0.0791821882827712
2008195	16	0.412472196280556	0.0146139478898133	0.128209904029651	0.0758968342952884	0.0234579837459439	0.151937820706144	0.284526364506764	0.0559931553811054	0.29666067653106	0.198816944964645	0.232459223611511	0.0737205283067377	0.234221484974761	0.133562730022963	0.0450897696484463	0.0987379277477191	0.268790426577644	0.420657160107452	0.0755772619771904
2008195	17	0.452655661127889	0.0140006508128231	0.111182052400743	0.0690833382699631	0.0189236939419619	0.126474595298576	0.263390615390967	0.104048037960674	0.330285153760364	0.178060925056254	0.34169836302558	0.0978461122058505	0.209272401724652	0.133383458459539	0.0437427729169645	0.129192936795049	0.2657974444234	0.437970632870463	0.0782133535491907
2008195	18	0.445499524144943	0.0141873872127426	0.0936879679937306	0.0631458590750656	0.015330065157212	0.105594279192729	0.245894511552764	0.187682907021112	0.358103530995278	0.263809365548704	0.430144661625455	0.123374310562905	0.186652441697093	0.132017359113617	0.0416542425751691	0.0894565734688248	0.262584950119281	0.434869344784299	0.0868070734353575
2008195	19	0.408884877479154	0.0149207283403181	0.0815463470426546	0.054805411644505	0.0131583271605523	0.0834115744990319	0.216026051098507	0.25501802729604	0.374604025495696	0.342212910886881	0.449445447639498	0.134559987153224	0.17876422375898	0.13540586812208	0.0344482452513481	0.0409087177722094	0.256787306732062	0.433260822675572	0.0977258009779927
2008195	20	0.389452789307999	0.0155104994073554	0.0782427900830538	0.040875923875102	0.0124084217478444	0.0647178292487633	0.197217293440846	0.221794114387601	0.375414678529589	0.401348837029041	0.422121235167887	0.133372977807798	0.176519740975872	0.141085792030624	0.0248097517137506	0.00768921340656364	0.246471515180907	0.428304601925768	0.103988642322622
2008195	21	0.406653401105247	0.0158879753264989	0.0721266872760603	0.0262321342757992	0.0120011042208715	0.0585674091745937	0.21782231485062	0.0956589348214463	0.33777464580591	0.591997204613537	0.35257145736678	0.12313950249281	0.180701866642858	0.145562396350291	0.0217927065735052	0.00210357916030998	0.23005782310693	0.414014780676157	0.103396999771447
2008195	22	0.438419768716255	0.0155529142476515	0.0511946843819475	0.0202970687136083	0.0119730082657667	0.0554243143719674	0.335456031320655	0.108897011526604	0.285269347224894	0.871332016834344	0.301188050744084	0.115300581838631	0.20348943522994	0.144103185055152	0.0205808440231705	0.00321702349639264	0.202106700856246	0.375084223775377	0.0998133602585903
2008195	23	0.457715788877614	0.0160813283410252	0.0455606261660299	0.018462454163798	0.0176061802857432	0.0398287192429512	0.51416587189292	0.270926211327996	0.255748324064072	0.915775401920553	0.260602213527405	0.11369214612116	0.242795112292026	0.13746065944304	0.0184473831819074	0.00336085203483762	0.15579495434172	0.316347911021814	0.0945566438031663
2008196	0	0.439389375456883	0.0185887493127332	0.0438105545232281	0.0167596331106005	0.0711997973537855	0.0223999352140164	0.76237674303322	0.344649110814284	0.220617111154278	0.859416004094009	0.224921808072325	0.116780562506547	0.288093897398811	0.129639088964791	0.0164378876895478	0.00287390136029537	0.124878203536087	0.258863752882432	0.0871488772938617
2008196	1	0.377148943430787	0.0207782909979815	0.044799269842864	0.0149491095376349	0.119176917001382	0.0146242976607079	0.833097121299641	0.398420266775783	0.206694617564969	0.749138452708658	0.192661543707944	0.124434442451411	0.321645287298871	0.121730541415869	0.0150881840898835	0.00549694880563129	0.10308021697289	0.233811629123446	0.0818799761973082
2008196	2	0.317440130136419	0.0215178898418533	0.0436003828320564	0.0131892959758368	0.117047585033364	0.0127803429431186	0.779379759534745	0.511219812165899	0.265582136865962	0.7169367485622	0.16034453522447	0.130999540997553	0.351340755591117	0.12664989228099	0.0152111089709251	0.00800992403152856	0.0905043977806836	0.287035767555904	0.0796638872075674
2008196	3	0.312639986175643	0.0265349910832862	0.0382478582993505	0.0122183169220485	0.16314727236133	0.0118927760574524	0.73005863675541	0.635225930482484	0.538152279392619	0.725458797655553	0.131216298243874	0.128649169598613	0.388421006333184	0.155938860598624	0.0159538189252331	0.0102390031724493	0.0825398948754833	0.514468425358005	0.0803648821656164
2008196	4	0.332583252052508	0.0412277084842918	0.0287493487767651	0.0117980229297792	0.304753096317934	0.0111365037555646	0.66698526400871	0.686322058632932	0.770643050643442	0.750924022235219	0.107969090051258	0.0931011070115924	0.412278867013861	0.178705151516918	0.016183578143787	0.0148223530441533	0.0769548552909291	0.776958418686079	0.0821119558270796
2008196	5	0.363417566920891	0.125769661917509	0.0223368314889028	0.0169550366466883	0.409610059336437	0.0131309258588532	0.697984303104466	0.697537666422394	0.781623068818916	0.710820402899224	0.0921406147792363	0.0814216394813796	0.475202014567969	0.181528454080429	0.0165959715503087	0.02859900366447	0.07278976708656	0.850060118756454	0.109769019142344
2008196	6	0.346844710434746	0.34633518044739	0.0204602764635819	0.14877573584646	0.518005146260548	0.0166732685300114	0.701712736008135	0.640762319528953	0.734752765954258	0.57193276587318	0.0823071935696991	0.0897836129025765	0.469435937746663	0.149385887248085	0.0179344663927697	0.0447298262542049	0.0695380269339168	0.819054851456143	0.0998081303236496
2008196	7	0.294382527302456	0.479325217937343	0.0162460216020632	0.206134782175358	0.635880925329045	0.0235643718214528	0.682450767156417	0.490269859676136	0.650934766077804	0.455131650244313	0.0773221513146951	0.102591562011386	0.402622678233941	0.157851538207045	0.0187695445659599	0.0481442813198993	0.0656367586891315	0.694936944930164	0.0843676831311418
2008196	8	0.259865188865083	0.533723159993451	0.0197893655439433	0.236290448775566	0.673367784343491	0.0560047773854305	0.545035793549875	0.342045094217816	0.623304134540658	0.36645499917151	0.0778489278441752	0.109752216673146	0.307073082546584	0.166960330936625	0.0193142780633907	0.0419200109965458	0.0567352782395944	0.60825342938856	0.076285865613745
2008196	9	0.247204766501493	0.440921838623066	0.0337031123283537	0.236311595281539	0.658067848534283	0.0938321878029949	0.401842073036252	0.297281915506777	0.638736138299011	0.28174662978606	0.084712345124993	0.106897839000508	0.215930206067276	0.143980273964815	0.015459582863913	0.0278336575324254	0.0381029874773048	0.587905105025892	0.0771619879048151
2008196	10	0.231412757604078	0.353906882993654	0.0310413578113368	0.230178778225656	0.609812995021081	0.126060496063304	0.29616972880937	0.287275240459818	0.640712545330232	0.203718819184625	0.0990901903753377	0.0939909274097779	0.150145663694815	0.109016378388469	0.0150119008618235	0.0225064726841007	0.0293240366201267	0.56395133059424	0.0527682810845175
2008196	11	0.184897067496581	0.287441755322573	0.0279137281810577	0.217409042285736	0.494144524561529	0.136325876251252	0.209266207876112	0.269476847453152	0.595934197146017	0.154399602072036	0.120651089376761	0.0883482922174108	0.131375588145047	0.0950515685173767	0.0165149170483969	0.0262011179196223	0.0348308247991302	0.510045928610038	0.0449380621054848
2008196	12	0.180158372245215	0.249708058416743	0.0264299414480089	0.19742319820785	0.339493328577533	0.13477650780898	0.144845332329309	0.215922048915847	0.447111453344825	0.181800967323937	0.142412925673815	0.0854413663880793	0.122213894215664	0.0937585133336004	0.0122240713650513	0.0313030408786228	0.0646711162652905	0.343559287579344	0.0425640068840224
2008196	13	0.226144834438068	0.216161521223062	0.0231041887098959	0.181929662148852	0.27480961912282	0.139132222348875	0.106010402863112	0.181263881719183	0.289429885189804	0.281863918120006	0.143848085894427	0.0800959023462238	0.108311497070313	0.101808768489442	0.00597344785569495	0.0320177653761826	0.0908695616220957	0.177040895278226	0.0881755598079628
2008196	14	0.321671158581567	0.165730603647974	0.0212226864234196	0.176920531448047	0.256466238065969	0.143751161666832	0.0969954682327657	0.164937148362602	0.190500571063782	0.41796004360892	0.129752199840378	0.0701847784391091	0.118350963107713	0.113222297340582	0.00291315250765489	0.0259166664256576	0.130909223002097	0.143196677553605	0.214131899910904
2008196	15	0.505640831445487	0.109794309282266	0.0200969174082598	0.22733105960659	0.227290266423575	0.141538459641553	0.170602286033985	0.142229719436945	0.130186440135193	0.621800092359403	0.120557835244437	0.0584572347873076	0.227815378300682	0.131072404970187	0.0023412054499603	0.0146600865609135	0.253460923286849	0.132363676255709	0.296456193332368
2008196	16	0.794033818422584	0.0679504058318459	0.0195637365353587	0.309148146958572	0.174499209801444	0.136889634354597	0.328731344769343	0.110728026355727	0.0936067546238738	0.836499477449597	0.112523099450872	0.0523119482281302	0.466599937772714	0.138449141227198	0.00223996985453933	0.0125767693887201	0.431316541415851	0.155514686273233	0.30594988985092
2008196	17	1.1686038885568	0.0588139621897361	0.0181089629003744	0.313015493333128	0.157279463051599	0.137001414776161	0.541336199086027	0.100640360347335	0.0874990356865722	0.89844678873455	0.110168701252195	0.0530171550128536	0.505121569348557	0.13203223477485	0.00151262250879095	0.013984664673591	0.520713141181856	0.215447487518822	0.289924800828186
2008196	18	1.33192409877302	0.0578446811996167	0.0168254295468796	0.288974093380038	0.145381076326231	0.137842945048269	0.707524896375854	0.109328613312449	0.124646305972499	0.991901556845392	0.111444444474122	0.0532613872826053	0.49107800932969	0.115392371494064	0.00107641410144373	0.0160373412357558	0.562848256314166	0.336801801162233	0.313854458937558
2008196	19	1.23009794400271	0.0588425882813262	0.0155242487579975	0.186442584917252	0.117360132437461	0.124018581360564	0.739210225008839	0.168959311476607	0.346758933878098	0.997853401900206	0.113513525964712	0.0549125386478919	0.474738393516206	0.0899107925317934	0.000992568242817689	0.0145094429923552	0.593082921054523	0.550165435337314	0.350507472968713
2008196	20	0.991067077151655	0.0586355176028765	0.0133673342648854	0.103801631971531	0.0969875993943587	0.0985801438992876	0.865684511848483	0.344838544295409	0.546279051268225	0.910778680275238	0.11579924826731	0.0660399236239575	0.490314338041617	0.0594209849154165	0.0028713700807217	0.0190197687236393	0.612364695575115	0.88012496080872	0.347986153398267
2008196	21	0.987614649520218	0.0619977267989405	0.0117304213908924	0.0835480783459311	0.0979117572728635	0.074022732530841	0.822914336601072	0.709170488099148	0.760139689492466	0.872094088641916	0.118538380350665	0.086744821575265	0.488475816220727	0.0480126529739075	0.00992329746573927	0.0833718860681329	0.61475001377237	0.887004430640179	0.328647725561069
2008196	22	0.932316495035321	0.0681348090192787	0.0106681468113872	0.0771519015507532	0.140949997510546	0.0559653354560821	0.764140135665752	0.868518844019904	0.864446412039648	0.886858386977513	0.117583367282097	0.115687990953859	0.463475058444196	0.0397021255179115	0.0186920320603948	0.155707964277403	0.584819994139401	0.92470305269974	0.310873193581626
2008196	23	0.900997388059	0.0672782670214992	0.010129321875365	0.0737497238666754	0.289583791593404	0.0456255751737221	0.765399395731405	0.777438154387534	0.840780801716304	0.98170391864544	0.105987906815205	0.123474982052118	0.491567158081941	0.0425144340465144	0.0227012114542492	0.177538699494328	0.520965459857012	1.05636539870287	0.299056244401462
2008197	0	0.889708206200442	0.0822205227486832	0.0100701126657312	0.0719395007115441	0.632224808666533	0.0391037525222166	0.907873094353008	0.700437752797074	0.924025212093147	0.977677905273595	0.0890542376276964	0.0877209267886539	0.508538128938979	0.0475758423240318	0.0250508832844481	0.170305518504353	0.456642586264408	1.15917460083498	0.28918454387739
2008197	1	0.742892943682004	0.178816682143603	0.0105757264644626	0.0744814793229402	0.691871116589643	0.0343288136985775	0.938231571576795	0.687478198165258	1.06802809397518	0.881884682612348	0.0872617453482313	0.10270212417387	0.489285343717413	0.0541291824039108	0.0260202559524484	0.177076758036293	0.389213580291598	1.20325194881533	0.278080541160218
2008197	2	0.494514073409109	0.395625762572554	0.0114636175143037	0.115858110620899	0.681512356937442	0.033384340600706	0.896524899782929	0.629509696431504	1.08527468871667	0.858741853895994	0.0977225644318482	0.107633689217985	0.482866928026061	0.0648770684301637	0.0265747650026343	0.200454927885496	0.368138763542165	1.26850327113292	0.252183651960654
2008197	3	0.388441426245151	0.516167546339113	0.0119505490868886	0.340261287976563	0.658269385763753	0.0333683131500747	0.886936867799407	0.599716331480132	1.05392714075094	0.706061713284807	0.133152171310131	0.105723651329641	0.526109682957545	0.0773149324651783	0.0256705730105437	0.214177784120427	0.412660947456535	1.31875567930321	0.208311703840955
2008197	4	0.36251067638915	0.528617296605637	0.0117730340083887	0.575742747334521	0.654248866210056	0.0415982915224259	0.892895520754955	0.643365177805678	1.05458586388241	0.492123897024082	0.16579211776506	0.100958098503542	0.696710687590296	0.0900136333151511	0.0270633968910273	0.209479854664172	0.50480953513309	1.28072632935213	0.167639320073698
2008197	5	0.365459069797418	0.507933789971277	0.0112348436194151	0.534876048517474	0.631173069552379	0.0579933315027157	0.632442875008885	0.630072848838474	1.14144200094693	0.47719337323984	0.171596883227144	0.087110790021151	0.769878987730155	0.129512443869577	0.0447108319793576	0.189926345081475	0.553196974125863	1.24430056267691	0.135593191163437
2008197	6	0.41210162669591	0.534703889943887	0.0106164339342075	0.522302065971226	0.583777442856249	0.113240820453053	0.465300737992302	0.638285041408322	1.09142448245812	0.465408756285846	0.168025023300474	0.069681593607755	0.572051315670721	0.209743309092057	0.178067094804351	0.121370184661169	0.547969741899701	1.23835474874255	0.101921671483785
2008197	7	0.438516028956176	0.422815897982248	0.0233127153910618	0.565952731286973	0.569358992705842	0.258953582278851	0.41920180416827	0.460073870167842	0.966007286934989	0.476632754656462	0.167957228535193	0.0564506959191334	0.424243082371053	0.264526903626006	0.336154503601381	0.059925114806024	0.592976359473429	1.18263674485123	0.0812220731085124
2008197	8	0.419877235110184	0.265821799487076	0.0344042721076561	0.582489010122993	0.55891065652539	0.242873007171068	0.352265788938405	0.345218354677032	0.68161187104415	0.474579907346845	0.189649703663216	0.0413728453997005	0.536002638473342	0.29543503649005	0.361657898329677	0.0486483417238686	0.608062706157694	1.0710690531923	0.0707632623821057
2008197	9	0.369095849884534	0.21172975484773	0.0406785149037786	0.509658423241935	0.526770825026296	0.208239038313339	0.288738296796943	0.29697091423667	0.504629892038504	0.376422059954337	0.224808851464636	0.0339159919957984	0.742750189387487	0.230287822403737	0.365021690500447	0.0427722837108971	0.681013458026824	0.81070695306875	0.0569364864752186
2008197	10	0.392790243036918	0.195912182065049	0.0419922939014609	0.395035897754992	0.435215674649027	0.204354825139229	0.2414057530591	0.252796783014077	0.429827654921688	0.52415119235001	0.222167919380115	0.0363583258844785	0.755057341567757	0.216640420566636	0.359397064147889	0.046977610703257	0.727080899760596	0.547407796063395	0.046243648672205
2008197	11	0.491728565092064	0.183979502593645	0.0405496836486994	0.304980215898713	0.342309743385317	0.241444870768733	0.184108019820214	0.230174428931541	0.339833141211919	0.747786353645307	0.210425016778412	0.0544127490877918	0.679560118933305	0.268733446257736	0.346074452625929	0.0707086216427202	0.741272212706893	0.446495318665683	0.0452355007471037
2008197	12	0.622707020750265	0.167714033570703	0.035121409800627	0.209614724500127	0.28557092150836	0.248353850512612	0.286881909687717	0.212963629146557	0.275080832263258	0.811359364228359	0.171403525961081	0.0760350153731352	0.627444242640464	0.243083553897533	0.325729487496953	0.0846165922121302	0.727485480628132	0.408156465800813	0.0509803306366968
2008197	13	0.688584116880565	0.140079981613358	0.031994664213708	0.152009194712689	0.239867139683899	0.176339938093615	0.427630092979941	0.217873987975828	0.256974855487646	0.748077616971687	0.159665956415325	0.0853103066382302	0.521673265567676	0.19567937149301	0.301000723730665	0.097913283922597	0.746947438867448	0.438431332888718	0.0629314024192935
2008197	14	0.707993176012268	0.115993728296958	0.029798989442228	0.121389244224406	0.210821165025516	0.139589138104335	0.375149975688254	0.230528720952663	0.278765054972393	0.785742733142844	0.219267956797014	0.0919236069779205	0.346848006381691	0.112547031878213	0.275930345415503	0.101293224518803	0.794390527581444	0.475094845486181	0.0587914893104923
2008197	15	0.684341380201673	0.0973567676585942	0.0280361989987109	0.109679762172192	0.187593839627874	0.125976235126146	0.27443832236192	0.220428278306498	0.277142941141921	0.678506579947116	0.328029865667222	0.0880916800574469	0.059050448679948	0.0506056910506261	0.249394308568598	0.120365440717583	0.841730418978839	0.451568118429067	0.043613385181289
2008197	16	0.679955524374344	0.0773729835658828	0.0269566239004866	0.102321605483204	0.195624173316604	0.120068672507797	0.329650638784367	0.235070900595586	0.276607686690287	0.51643696256047	0.44203332134592	0.102074323303313	0.0058705047384214	0.031025324969563	0.223819111920411	0.127875479250898	0.846459965453292	0.400750971451002	0.0616354959320274
2008197	17	0.43871429508477	0.0615463403767257	0.0259328950971592	0.0972955132020258	0.193450334242112	0.116703108515945	0.31747739831503	0.274771706129695	0.278037374797247	0.690638699018759	0.617777344416531	0.139354731943758	0.00484464604536097	0.00558201105423044	0.200768005709745	0.148363779898835	0.807861345467972	0.422459596698689	0.0746275159288071
2008197	18	0.405906942646881	0.0574605833810316	0.0243697015442899	0.095189817605465	0.172860622944041	0.112741431816883	0.336352381610429	0.296242284216572	0.330244694852483	0.753732857763368	0.79523807235575	0.165070555106817	0.044451334051381	0.00115121228605234	0.173186972068556	0.19058465524301	0.741069818292481	0.535690296545368	0.066835342725521
2008197	19	0.469840151533981	0.0515400880442962	0.0214155937591048	0.0930788689816444	0.170850688632083	0.105749928564474	0.415639331264513	0.259055813690435	0.371988936280034	0.926637309314983	0.785095695821987	0.177025890263803	0.16495155515684	0.00340014173507841	0.128315656367908	0.222400308485662	0.656602171401783	0.603076004817202	0.07384187483036
2008197	20	0.433030694785022	0.0373236890102742	0.01872918673172	0.0894463487082499	0.180957524226058	0.0972696081927564	0.480761932074441	0.219934453011434	0.385348154572174	1.00530926941991	0.748558152028706	0.166569444370583	0.293412655654138	0.0125328910958213	0.0894080167263027	0.236368782530928	0.563598510747952	0.595784070134598	0.0895447896926109
2008197	21	0.443341139432194	0.0322284370799905	0.0166297867850361	0.0851123671499089	0.197451552344534	0.0875770834577063	0.574659292126379	0.202549445020393	0.417005023828752	0.748385097900254	0.70975851005452	0.154329950465836	0.3198981526733	0.0396983629510414	0.0762137134588298	0.227230568735916	0.485124800768193	0.633607305713661	0.103567259675619
2008197	22	0.468945249149284	0.0320156665534135	0.015070181626038	0.0769642498878087	0.210959693571241	0.0769672654141396	0.556111013479588	0.1929765908569	0.459455511240144	0.474140864537508	0.596398756333353	0.159825135603995	0.314626670335608	0.163587510694329	0.0765302829472621	0.205216264913196	0.491853609928079	0.794636825631388	0.117325119058969
2008197	23	0.263212580285697	0.0347776453014649	0.0141105466647596	0.0558930627591114	0.139936788663309	0.0658365496530969	0.410799973031401	0.20460107781785	0.477805501131047	0.534485040933295	0.470340021685212	0.183864886818001	0.334097134106788	0.23012752064406	0.114698218562387	0.183576042223669	0.540089071223021	0.91463201699812	0.0866049746983015
2008198	0	0.40238101516129	0.0311135965701419	0.0135482090063119	0.0314286205096715	0.114439903210178	0.0568512990260043	0.320780072674199	0.189744622887739	0.492789930292848	0.680919061751933	0.475648581166229	0.234768202384456	0.356677278464377	0.237350650653955	0.256753707920737	0.163739803327274	0.503585249549328	1.04031950354033	0.0641121186400866
2008198	1	0.570808016118251	0.0274062216006289	0.0132022947080333	0.0216015745850061	0.122867962864366	0.0514339897803334	0.409747232861301	0.174431120640559	0.51226541355254	0.754538296461284	0.55601086885926	0.28090026343528	0.396047490849349	0.23444703607865	0.34647910837547	0.144015889388249	0.461286452284325	1.1890141531663	0.0579889407583623
2008198	2	0.651787115841596	0.0305842548095648	0.0128657350828149	0.0240675545495103	0.13898984057647	0.0440303333364396	0.541259393239136	0.17481991251336	0.642194740813229	0.85285936648434	0.591699669340525	0.3025696505523	0.457097779604156	0.244701924065191	0.373939438174171	0.127619828010056	0.605431548472103	1.17950882725971	0.0430987458627528
2008198	3	0.795173839181942	0.0328821569740976	0.0122836799444967	0.0233710620625832	0.112795664197068	0.03449500288613	0.587374866362802	0.0999010004841833	0.849510453828629	1.19699137591404	0.556547860180412	0.29192894934772	0.356611123669821	0.258438258525087	0.372626993756896	0.115861309071467	0.680758798272657	1.13468987811749	0.0330121630431048
2008198	4	1.05601750643544	0.0351910596582778	0.0113612214740986	0.0221169092038355	0.0756387668425238	0.02361844820512	0.775167411571489	0.0639361881739582	0.81832133990881	1.21958341976889	0.472130774559409	0.311054488708796	0.128959858525629	0.272727834726922	0.36013684556309	0.109164217041336	0.690100964378671	1.03335018909944	0.0226476721593448
2008198	5	1.21890433669104	0.0389999879427466	0.010434758899025	0.0294253097709326	0.0562743661054535	0.0139539084186254	0.980717286051888	0.16519277511725	0.7261327152466	1.09275664280467	0.4145528143202	0.34396117682161	0.108682431223364	0.280710955427799	0.354621001090788	0.103713586598233	0.639991341212856	0.79002902193133	0.00781356055093196
2008198	6	1.23946391015107	0.0425418067538926	0.00994047822515095	0.0356681191310193	0.034681360225721	0.00218030222371578	0.879169108706115	0.427206096634649	0.61138140416939	1.22649422842161	0.422316569244249	0.404954054489109	0.224798470148709	0.121561827203242	0.358383576722411	0.0934791393648796	0.361273387718186	0.643042269907327	0.0593211765105207
2008198	7	1.27902569665012	0.0376795534777445	0.0241155870823638	0.0413844311337719	0.00956361433717857	0.00119982684371256	0.748661775329111	0.515233772968626	0.579553280615239	1.57651768030277	0.449660877323375	0.482382572387371	0.301280654011078	0.0600265119082441	0.391627663981151	0.0811786529104301	0.339688414850106	0.346742384580176	0.355168595499314
2008198	8	1.49661709826176	0.0292337486262683	0.0495144559261204	0.0366095001104535	0.00926481186592093	0.00675144784276691	0.895571333324701	0.579838980860465	0.710521287729353	1.37942934295779	0.422118797793748	0.517965515010344	0.414860294427839	0.0419965953832085	0.378249991055764	0.0741985560728023	0.299705180667989	0.508037054660317	0.478077012683336
2008198	9	1.70799592069068	0.0180573263857514	0.0670645387612513	0.0330494373861359	0.23713339368179	0.00990314411365725	0.959074346174146	0.559592901640067	0.707558319757542	0.841214833108837	0.36342894600614	0.518072726126664	0.539899856393818	0.0761935467378921	0.339357058179281	0.0640758794336606	0.274609917115293	0.779817133301261	0.436937275080281
2008198	10	1.79083612693171	0.00871317733148401	0.050510763739537	0.0284938799973369	0.416814481783932	0.0146480248433458	0.834188774112833	0.543877181365722	0.655498950016926	0.82517734335117	0.32719050867829	0.506096775659028	0.528425347318824	0.162266303078188	0.313707647421941	0.0399845323901442	0.235128302885439	0.843444599495194	0.377092514049314
2008198	11	1.88335411714167	0.00310404305802088	0.0408417254952045	0.0181913207439875	0.406927210635784	0.0188414742232155	0.522364071613098	0.574314022413867	0.75800248492928	0.761362491045991	0.315471261761241	0.463931635831884	0.45578080281512	0.205602574599171	0.281884433272978	0.0300893207508752	0.185770495185812	0.827343781051134	0.350175837919357
2008198	12	1.95650182055404	0.0228099134578616	0.0349371044284605	0.00481905254654232	0.396993924929681	0.0216708325742101	0.385023324971209	0.655604944746615	0.744496843134174	0.984815700748496	0.30937204704869	0.420540182351606	0.340655851385642	0.18422509812951	0.225727586147171	0.0205113673913899	0.110512720172325	0.729620281376221	0.341874372789583
2008198	13	1.83281057356963	0.191531410629707	0.0312517156500654	0.00319807986733139	0.398093891554848	0.0211557717733727	0.380109068085035	0.800759289446332	0.552000596917551	1.5430826554242	0.316755141964387	0.365151081654816	0.27432016030047	0.141543127926698	0.174258831207079	0.0140435265607949	0.061675929891484	0.565074602489453	0.354281559316497
2008198	14	1.32417409297114	0.208382291238034	0.0281871579814642	0.0327284482647032	0.427255209092305	0.0160131777308375	0.755597203655832	0.961497823911263	0.339443467300827	1.65388077703764	0.317082768858014	0.286955543383259	0.351532005151578	0.111754759856409	0.122453228817274	0.0105382887995743	0.0672948218783108	0.902350807720478	0.398530446028053
2008198	15	0.860787048771657	0.178040632104207	0.0241003985895589	0.101898159242646	0.475129503378249	0.0130155424654972	1.05870563799373	1.09289244783356	0.313008369945019	1.55834692685978	0.309950849791184	0.244308893965112	0.194109079628414	0.0766218163720563	0.0915146455999867	0.00892959875558625	0.0793318339521385	1.54973188827632	0.4460871690169
2008198	16	0.78608075945062	0.155356365666534	0.0190012159932424	0.155055599106404	0.568451110457992	0.0122067948247272	1.15164724768544	1.18531763279644	0.893315945534958	1.35873893458004	0.294914190116568	0.235870826032155	0.0887034000349722	0.0503341580956533	0.0759480208210737	0.00796553959010566	0.171622682699622	1.56229430622101	0.469762713077755
2008198	17	0.746189243766917	0.145357059951564	0.015092759223028	0.148056678325474	0.72606551722425	0.00945495870836847	1.11867609185983	1.14004784185672	1.20322039604462	1.37151984293099	0.294873755044505	0.259493223349086	0.0658200051159741	0.0318467699193981	0.0629151948097971	0.00715648076252762	0.459332902051329	1.39349249035742	0.500359352202735
2008198	18	0.959537579737292	0.139466898071632	0.0135210085012703	0.133491601778492	0.899970951750709	0.00959492575850814	0.997522757320927	0.971788242319262	1.13921439524514	1.63298844270068	0.357256787656207	0.262036537480582	0.123598521816532	0.0174858304103617	0.0445324523669506	0.00677011625442515	0.527469023100358	1.27167115856752	0.531132572161015
2008198	19	1.31982175503783	0.140431360652069	0.0123328168950092	0.117959232820411	1.04336832488943	0.025032263922781	0.98469690189228	0.642832909663004	0.957405880811383	1.72357259036933	0.467829778607619	0.244757817261612	0.143426082957292	0.0111082584515914	0.0209095247050845	0.006752963781061	0.50001107565564	1.44887090630502	0.59008528847014
2008198	20	1.35613625397867	0.174837500859204	0.0102818446008007	0.11624047987946	1.10250903836969	0.0778445866710647	1.12915866055187	0.452611004384282	0.910012724534515	1.77939378743341	0.555324437838812	0.219746420189187	0.13693430496009	0.011576655202496	0.0112249564367087	0.0063001100251907	0.460327612273837	1.45215753315873	0.663936256450387
2008198	21	1.28136315549074	0.270029997984788	0.00850031615134179	0.11850031921296	1.04536652229271	0.136865140242063	1.24942481399628	0.401616433962118	1.05024178079395	1.82404026878236	0.566045175489143	0.198195161598678	0.142369399020491	0.0109652904952048	0.00889552027931079	0.00570004963541124	0.462978432858714	1.19386897601435	0.696036091728301
2008198	22	1.15350963797501	0.380884405828322	0.00708817851142409	0.133042749686245	0.87526882990738	0.154641549021552	1.3373362668891	0.507126594397844	1.18178437784017	1.8012739661068	0.497871201666528	0.185690005938244	0.162143095068293	0.0100309012353018	0.00797862883515697	0.00525241450263416	0.501709128673923	1.20657475268142	0.697390597730084
2008198	23	1.0227909646713	0.43035365951558	0.0058365818084093	0.236015163496191	0.570048690282001	0.153279364408775	1.39330612898411	0.787176942927333	1.21882164336324	1.80120455635821	0.401951151892731	0.177448645133686	0.179361923264104	0.0111463082026996	0.00703176798987516	0.00515385875662645	0.623357733461002	1.30375552498229	0.685283801641941
2008199	0	0.983385906496075	0.480269742746032	0.00486203822678962	0.358764675696606	0.38609446890093	0.152509381728842	1.39452895804962	0.856685249789928	1.27716131497283	1.84763975632875	0.311721852687228	0.172576010279557	0.208356422743474	0.0265389880989115	0.00540444852564188	0.00612745757944008	0.807955455942938	1.23258605713671	0.662377186308435
2008199	1	1.09894577033811	0.536004108460009	0.00527747087681861	0.402315617411896	0.366575250225256	0.161879747426668	1.43365343699517	0.795587275987663	1.13667628227441	1.85002268347637	0.221413228513409	0.167458021098112	0.230409287122672	0.052221097049396	0.00358743542337789	0.00744473165449764	0.845471125198036	1.19195892679256	0.589372077081434
2008199	2	1.22634709245444	0.588266832664097	0.00515160923666245	0.448481517223928	0.480482595482053	0.180616267242536	1.51929006790186	0.732732015094713	0.93573602514761	1.83981497071786	0.153739204155454	0.162042130984072	0.209778939402312	0.078919517554076	0.00471791592159179	0.00947374368004424	0.787921379121616	1.1913710326085	0.506825740818301
2008199	3	1.24888257869311	0.631831553578659	0.00621018940391405	0.544696358284802	0.647862750763076	0.205652993549967	1.57546693817219	0.748566096807279	0.756465779590771	1.74622379629717	0.114197632159186	0.154556635433056	0.186635022388704	0.0989200207061944	0.00778884331444813	0.00856533898187998	0.712543874472165	1.17109538522172	0.362764906634861
2008199	4	1.2258712736948	0.585481754320703	0.00978447273194651	0.691553643395655	0.685791690559828	0.251572459743751	1.51789843850397	0.815563587503096	0.738724876191975	1.70012677098265	0.0902425667720318	0.14371276333392	0.171224007768619	0.115119275494715	0.0110501324911216	0.00341366920107152	0.570645217374727	1.16240947312738	0.1781761701758
2008199	5	1.16327091089443	0.584253272493746	0.0190311775266047	0.751800383879326	0.661513217602452	0.331262935812738	1.41046453914312	0.853166224374409	0.783694684669202	1.71109610118119	0.0804546864389452	0.129598954315605	0.195094603224773	0.138988889281807	0.0112847909113774	0.00122796386855512	0.465389503740709	1.14216518156386	0.126203983695645
2008199	6	1.05832910701377	0.608706229413145	0.0340678324983174	0.705731432755702	0.622610450574926	0.40178743743479	1.33058375507316	0.815483576952451	0.842094332638721	1.70253897934383	0.0777086309197184	0.116432719824695	0.359550425561025	0.154832398268638	0.00980643513871879	0.0119797125185043	0.462561899399761	1.14610462406368	0.1207974297414
2008199	7	0.910691881818282	0.722537255458975	0.0472722570742375	0.661046411498928	0.587199226687999	0.390400034530577	1.29067226157284	0.761456543713431	0.832467993702092	1.63038854659161	0.0746480878360591	0.106252026041571	0.448515890730345	0.14347195048231	0.00842455437618145	0.0444596075390322	0.562054081049599	1.14311278815408	0.141179187682683
2008199	8	0.820897192151762	0.693003660985688	0.0494301495779704	0.675559058236548	0.583507896404042	0.354126752717349	1.20882612633471	0.713722777641321	0.797959101049998	1.56721034604387	0.0857839546624452	0.101330286402346	0.449642998461253	0.152727856660508	0.00747368774366645	0.0616863598330109	0.644009975223354	1.13523362797164	0.15368589969393
2008199	9	0.771771208370129	0.616932471779211	0.0523309921671298	0.590791009063327	0.596144452360628	0.317757891634033	1.1982972528144	0.664864326410075	0.770952698179645	1.38025556127033	0.119256275764132	0.0992038202676641	0.430838529600312	0.173654350407155	0.00686455552643529	0.0666310661573802	0.655532183004175	1.05378080232992	0.169381498751691
2008199	10	0.707700346301362	0.458083059530673	0.0583393252374691	0.471794072873885	0.583731036198885	0.306622843915015	1.03227930750665	0.610831360771862	0.748253050957969	1.18210577100628	0.149959261247489	0.0986591393225233	0.398572737512438	0.205719417930891	0.00658340883789443	0.0669230445469534	0.655590338097625	0.993740101547341	0.209379961642443
2008199	11	0.647849880537512	0.354959434187411	0.0620700592369446	0.410877143017217	0.537758613353853	0.324231283737735	0.84080982443415	0.523259577014062	0.727515094931013	0.96452970428903	0.15975008100185	0.0984827752692982	0.373817005019246	0.222648111923433	0.00898842962017976	0.0656155143941568	0.670541982501043	0.953920028403862	0.305387260907541
2008199	12	0.616180938048621	0.269779748733392	0.0654789687154653	0.369163477870606	0.480546762140829	0.348161404923247	0.775741602662992	0.448180678123397	0.700263872393674	0.732724994663772	0.164781557461736	0.0978725640154776	0.360050126116426	0.233842213592783	0.0227299907352019	0.062182627263714	0.704708612965124	0.937169259877613	0.380121793110678
2008199	13	0.6157762954355	0.21514010788076	0.0716998282599385	0.26996605441933	0.429864323482034	0.353012866108863	0.71124854843728	0.372447383571462	0.662197060562057	0.600478801809551	0.176068728756226	0.0964352879095424	0.380385572702793	0.243529414227075	0.0432612290673113	0.0595456048655593	0.757446944587752	0.88540750524263	0.384000722703048
2008199	14	0.587586261288343	0.143472724371092	0.0806326069320571	0.221945317010248	0.394614138123074	0.339657718624409	0.601180280452657	0.323928328597857	0.625494082767506	0.511113315155983	0.254270139613069	0.0937453531770076	0.421821447867392	0.243599159489116	0.0597171019623179	0.0603665700426183	0.75603229562325	0.823528880117033	0.365210997346593
2008199	15	0.477842624939054	0.10462328829484	0.0863960135775071	0.225241350801752	0.373276847570363	0.312024898624482	0.47678658646744	0.297505872260599	0.602614758638097	0.4184394065635	0.392486401208929	0.0900904254161234	0.448369884948448	0.23561367597198	0.0671553565778689	0.0663334933810252	0.72244242747544	0.76716384410503	0.349579349264306
2008199	16	0.22457259504482	0.0958317218091968	0.0844843736408721	0.22693573487726	0.355834573660269	0.27671291532235	0.399032529048902	0.272915770264812	0.598735923629517	0.349400304514258	0.423399697024265	0.0855989345239682	0.440454334509264	0.224578617009985	0.0670713819695686	0.0723404671504497	0.674356182914259	0.710013115821286	0.348757562386888
2008199	17	0.0891866189706272	0.0976075373680444	0.0813897875720528	0.183291793789926	0.332316262302593	0.245155317940125	0.338428867089005	0.240008993620735	0.653670326280011	0.278930148045347	0.343740998761707	0.0795727221208015	0.402628119634073	0.208043925948834	0.0665853737334784	0.0763485306400749	0.612916329104599	0.65301040570515	0.306950707740092
2008199	18	0.0767344261973874	0.0890994716985063	0.0795319600501111	0.153717845903795	0.304190942174561	0.221566702559675	0.312276160958386	0.181105227498912	0.706858899815207	0.23538348632755	0.226351202975341	0.0682691063928133	0.353672932430846	0.189607279598531	0.0652986765681665	0.0773469459331291	0.544854879625978	0.637866106034375	0.171650705532197
2008199	19	0.121673772465852	0.0627343360716002	0.0761123605192182	0.185951661607435	0.270467747334895	0.205831512541019	0.309136546254715	0.0754960753101725	0.661006634878775	0.207186510358149	0.167253525211296	0.0601093345990452	0.312115204528435	0.183120419956001	0.0630540190843534	0.0769563711579641	0.475756408989686	0.651172245700464	0.133404520211431
2008199	20	0.426248397012891	0.0335671606804155	0.0691284475407414	0.194584686028534	0.227276179104827	0.197118128118167	0.31695297225584	0.0132575342324059	0.543378874688914	0.183454750276144	0.135027384781883	0.0728696237118027	0.285352773731861	0.197753565298592	0.0598127320965844	0.0775000815881461	0.416317684549689	0.672536533225713	0.125010891066451
2008199	21	0.675614497812123	0.0205165643221912	0.06131023310842	0.128653449272886	0.122726150875412	0.203514218480472	0.329361800282733	0.0100012856384341	0.426443865471126	0.156064477363341	0.132533014420526	0.0974643621455499	0.266100138027644	0.212219697462711	0.0552179427546535	0.0778301659645417	0.379702076223829	0.667450404444469	0.105644734328462
2008199	22	0.767802940554754	0.0180381206968199	0.0540494890586565	0.0923917061768664	0.0417628202206197	0.201779570014529	0.33945739940627	0.0587369962558543	0.370283841636869	0.117491124431287	0.127768595217282	0.101556292356887	0.260955959995364	0.220622419334169	0.0503717210888041	0.0770280049187135	0.376556332548826	0.595506308149876	0.154573064102099
2008199	23	0.784815714507684	0.027344420989116	0.0480008078063857	0.0831051498760657	0.0279185768786991	0.177739001556749	0.359816859844561	0.222584983229033	0.344292713887505	0.0819211262720771	0.121487075939492	0.140260076625247	0.267807113269361	0.224863130787229	0.0460276388305738	0.0745788554092621	0.383974651979635	0.387045270002863	0.256676769703566
2008200	0	0.728542152183221	0.0587345691552239	0.0432140940393787	0.0772257417091932	0.0160742571934842	0.140565840945992	0.326743182504878	0.38454815049902	0.313815840985264	0.045553583420788	0.144885954178597	0.187196299478121	0.276411171832931	0.218483593413655	0.0422769427241643	0.0714349034885439	0.392642896215405	0.200383247995031	0.252174258233271
2008200	1	0.616701761487779	0.118265018591666	0.0395823466425726	0.0676312841410478	0.0192928132683761	0.118272104009284	0.244048867842587	0.428680831435444	0.270065122721336	0.0230905980698747	0.138738477729202	0.179716091262131	0.284203236512053	0.219095504503325	0.038918761508388	0.0681605432104699	0.398812741891947	0.142236769521087	0.233291937097896
2008200	2	0.473253851253351	0.189334560830052	0.0555466840581891	0.0535718172934226	0.0408572597250081	0.113821252812854	0.16754798697886	0.381748873744907	0.197660739901845	0.018432243206925	0.117259629564926	0.181992024337123	0.286308931146637	0.240597760440395	0.0363658006210181	0.0599106102134183	0.386604219473711	0.112725185183072	0.219402573804849
2008200	3	0.542525068449885	0.224879329368723	0.144721283647947	0.0396743287398997	0.102065763084702	0.119514190870805	0.0819985640533502	0.24074275574167	0.112774491499493	0.0256357535302625	0.111446355544732	0.284621027672576	0.280303623784302	0.341093193285914	0.0396619080802681	0.0569391640306916	0.326510587874705	0.109010848047577	0.250182593161639
2008200	4	0.436897156340109	0.215890614710951	0.179206794600353	0.0297111301144222	0.157552068533474	0.127556546085272	0.0605801990679154	0.182256416272836	0.0737435780486822	0.0836254910190448	0.115345655672112	0.369471823321519	0.270525143313187	0.353422357019373	0.0378116856336397	0.0606515827859821	0.286751273630227	0.108204379629668	0.272688474800101
2008200	5	0.334542682586286	0.188510056756566	0.195699040766583	0.0317823654899726	0.165046840977982	0.133983245868786	0.209502235069338	0.202229931695466	0.100412650833412	0.064239024584279	0.119449690359808	0.373143783679597	0.272145261587055	0.30198369357482	0.0410706826696625	0.0607962638944715	0.266431000229437	0.100907014630292	0.269193544886158
2008200	6	0.285008714777193	0.107422863294476	0.200721408024838	0.0423261745362831	0.166005386312977	0.141606933204961	0.314440994606455	0.282727509005461	0.111879439135729	0.0399884746935411	0.122725849287755	0.328764273873892	0.300371902885471	0.194114465054375	0.0476394402175089	0.0588083618041936	0.229852827162795	0.109418741524327	0.264996813657366
2008200	7	0.242986790922596	0.0330435934749409	0.191271839960651	0.0489216411287323	0.165119923951977	0.158184370898126	0.179783479023645	0.282200380989146	0.111666328419408	0.0363024379799388	0.130466630020619	0.253779645061415	0.315046796415729	0.16528093157774	0.0509345288490093	0.0652798990013882	0.188466965400315	0.110371718471774	0.292640599390171
2008200	8	0.188406102540871	0.0291473461541394	0.183597444626395	0.080082813962878	0.164298421834157	0.164273682193568	0.0611859089409953	0.231814978565749	0.201069725002939	0.0367152467972185	0.181266068161492	0.239558022403649	0.306021425820019	0.171461617154927	0.0540264536108802	0.0812141801790912	0.182441015512195	0.0876595448424553	0.335648826616238
2008200	9	0.120041563618761	0.0281706856568616	0.197587269802146	0.133656636959831	0.168805367867992	0.143272804359177	0.0318938527627455	0.170027791244129	0.363535770702247	0.0489994825528152	0.302824833693195	0.261754053374028	0.272395949702945	0.16605745257447	0.0568681526660936	0.0883151759189693	0.199505239682652	0.0588158566188078	0.351563155845178
2008200	10	0.0839646217864841	0.0241211272883685	0.201215647191243	0.174127011121332	0.187394393616077	0.125876916610633	0.0241452453230281	0.126358000698863	0.361125790156025	0.0616241786103052	0.376903094910213	0.28115471938542	0.221229891718465	0.143445009586968	0.0497434654900996	0.0758189440365119	0.225816453586864	0.0365235712802536	0.284831921216659
2008200	11	0.0780116503974479	0.0254951764713814	0.166206891596869	0.170041182684637	0.214774876364085	0.116822128968539	0.0214240715495356	0.0983282066431123	0.16486726791943	0.0667765992054114	0.395977708339669	0.26414673816584	0.198353511440606	0.129657408367834	0.0448216086497916	0.0573483154174709	0.217389171764734	0.048768657341641	0.150000727162972
2008200	12	0.0826173307989286	0.0318423818340969	0.134758528684479	0.127829042001245	0.230882543820758	0.117148817294908	0.0211153746397153	0.0751826792271577	0.0763823862440663	0.0743833389175222	0.401295903340826	0.230029666248383	0.189560003356682	0.127746128901934	0.0421036492896044	0.0554404363086293	0.199725874990002	0.0770568732505915	0.108888585743856
2008200	13	0.106553440111418	0.0446070630287125	0.113464343460487	0.0848803523919761	0.231092934762851	0.113523793562911	0.026307706478472	0.0540988603763954	0.0481984703017345	0.0876932497630041	0.40426009754279	0.221802968824467	0.197652997184354	0.132506694278073	0.0414789298090994	0.0759686532902599	0.181241167259714	0.0737903977537939	0.11095681650203
2008200	14	0.135900480525674	0.0755961710664463	0.110040205832413	0.047049720289258	0.218050415802265	0.101536685221754	0.0365392858869212	0.0427243146251814	0.0365901952467962	0.126070498546941	0.408244467543082	0.221661341723024	0.219947182118592	0.14051821168126	0.0421046233321204	0.100183185095674	0.167952034475834	0.0602188071792551	0.11630941939332
2008200	15	0.139568990715993	0.113271192266044	0.125537802864637	0.0367671656501547	0.179942650101993	0.0794262158438599	0.0499698952393201	0.0364605534268997	0.0301722869813762	0.240527735247867	0.403610470904919	0.203934808672433	0.249089294951198	0.156415583475687	0.0419562296074471	0.11373239346242	0.154029730604568	0.0454909904189325	0.155576968923504
2008200	16	0.136926823786247	0.121930263323396	0.137969431386637	0.0334760646525097	0.128324850203553	0.0647898828587611	0.0609080519732186	0.0340491564374703	0.0248554098431677	0.410232643204453	0.380594513011285	0.177615912055789	0.280938589132832	0.169692180916673	0.0409381358619218	0.120652857282727	0.142071821327958	0.0381738225266274	0.19148395647001
2008200	17	0.130772733118914	0.106505213195419	0.138910532257393	0.0316373655094743	0.0741753287030943	0.0550950901426952	0.0737937578182513	0.0393596562006446	0.0205956958552004	0.51236384302164	0.396988544448252	0.173461108016149	0.310250378515736	0.175730591460615	0.039641368666984	0.128901082961458	0.133805109208044	0.0351550616000044	0.199936378643037
2008200	18	0.121840741325886	0.0840834367552803	0.136931266565841	0.0323641769537988	0.0377751102420628	0.0434484036953005	0.0953618725756411	0.0478556836539565	0.0201964287316922	0.530087164920631	0.524468119585074	0.192041007349759	0.320785236840891	0.176587909002671	0.0383273897302117	0.13100705641721	0.128558179176583	0.0347833416144	0.184397336379749
2008200	19	0.116362642469006	0.0852538540000649	0.133148157550173	0.0376059986133464	0.0280567570578005	0.0373649640823553	0.163188519971486	0.0557588287221058	0.0228292015007872	0.524683760426471	0.605034893787585	0.202643562193407	0.318512547963506	0.17465852042589	0.0371450446416362	0.128204638050974	0.119218739106367	0.0372016972013284	0.181883888368761
2008200	20	0.113480211863349	0.0935121955508403	0.125414105772067	0.0466283797484421	0.0267859699781525	0.0431138393986977	0.261775230815177	0.0598396396947815	0.0262439274143538	0.509040430223093	0.62852420320031	0.20589956669012	0.325619643171062	0.170037122599051	0.0357642712410743	0.120036465301872	0.105925620292048	0.044508436571436	0.200560702830419
2008200	21	0.111809775239429	0.12574209229717	0.119705157228807	0.0597465726332736	0.031563625414132	0.0759708294785217	0.324205811035973	0.0614371730919771	0.0303607870822617	0.481525105621242	0.585888053011003	0.205521182930592	0.324801159054558	0.163933824888216	0.0342642179258631	0.0929848058433564	0.0870279646908974	0.0561407425597947	0.200442310480887
2008200	22	0.11083728872427	0.135077276147898	0.115175564730966	0.0795211015952	0.0460057242785585	0.120947178345178	0.340262396500789	0.062326070356457	0.0361591437045564	0.456063066910712	0.56055211865668	0.204141544423582	0.291489812326457	0.158327420261378	0.0317849122995233	0.0704589629494383	0.0731408650680796	0.0737628038786748	0.169291163038373
2008200	23	0.110608920436243	0.119555498963632	0.124635821840582	0.0923561773059739	0.0561675027135459	0.16089406744822	0.327055430644198	0.0629263161438604	0.0415298503819049	0.431055065180346	0.523953679090509	0.201972531754387	0.264015350949026	0.152940789098979	0.0235247185877415	0.0713377349311517	0.0689942595032592	0.103628474234395	0.144192147396838
2008201	0	0.111694362362183	0.094341802121953	0.12338601060733	0.0952499580817581	0.0546910857613926	0.186937622671969	0.307480992927841	0.0631791431147893	0.0468531007531098	0.404973706051255	0.445971299775339	0.19932124527794	0.274387977832841	0.148039506118532	0.0173300918835363	0.0781223940943758	0.0651242902600364	0.144518511245625	0.138467240709073
2008201	1	0.111602036868786	0.0978383670937508	0.117318114260224	0.0950209447921764	0.0289121861551571	0.215567818166265	0.285338937031673	0.0622173975097802	0.0528131745458265	0.383239331776504	0.431964621114569	0.197317453043493	0.318252847476235	0.143687768859273	0.0157507060066121	0.073909855465891	0.0636112712722728	0.19355981270786	0.18374992349243
2008201	2	0.108697337470229	0.125606363484894	0.113948784432696	0.0932268159068066	0.0139835387174359	0.244395174008666	0.261921621482831	0.0583452152729431	0.062268381525697	0.407930204602928	0.385102233525799	0.195943035239857	0.351709093993774	0.138829717774133	0.0166325153508185	0.060856234057693	0.0606937037925132	0.239084145368127	0.244943432529991
2008201	3	0.0948232457597657	0.155080431667661	0.112746887633055	0.0949189584417216	0.012429423858367	0.242329540246589	0.23461900574109	0.0496985909684603	0.0766270463271024	0.350182922403798	0.337307294525181	0.192753390037434	0.357996469528662	0.133938564016809	0.0287909227007048	0.0572519712543618	0.0584159892708785	0.277726220776858	0.231348037707799
2008201	4	0.0657410203232919	0.146149992025835	0.102885204781271	0.09702600230748	0.0133424695455337	0.226228045143473	0.199826849971698	0.0378119108594748	0.0908682216977121	0.300347516435708	0.286115705270825	0.189858295335432	0.356276302753625	0.144169533288556	0.0416878602150849	0.0772635576623735	0.0580295079120946	0.313320556466349	0.162277854965707
2008201	5	0.0726841387620326	0.0994271794020064	0.098379295119597	0.0977845540530628	0.023017762800756	0.205574728652334	0.185885480597618	0.0272201410174158	0.0987222767996903	0.223005057358153	0.229035407821081	0.188289667728537	0.357533938211986	0.17104992381153	0.0495492590198432	0.0963462159659854	0.0584867622661889	0.326389779870157	0.0945245323374629
2008201	6	0.0522202842872463	0.0845282046192137	0.318994938368762	0.101440167124117	0.0268876150863447	0.174813385843924	0.138338997014818	0.0241049338699041	0.102238787934972	0.122619213447188	0.201253331407753	0.190279999035854	0.365836670113723	0.224901548278561	0.0515212332416823	0.0992417737041149	0.0610643136734004	0.322593189461219	0.0617460984260376
2008201	7	0.120845616779028	0.0820119783346958	0.385258587689223	0.115312863592093	0.00877779225352293	0.250595354352016	0.137501956359593	0.0342469521149619	0.102564445045913	0.10217643104559	0.192177757812119	0.196351569996963	0.344453498876863	0.325301979178806	0.04906244234169	0.0951480711882672	0.0649444903543687	0.284523875192905	0.092080428072464
2008201	8	0.269837686883327	0.073274190830603	0.32489236971237	0.148721490183742	0.00530237634470437	0.290522386789155	0.121808785732017	0.106671215941868	0.102347861813167	0.0856158537406912	0.170370560150189	0.207355952428459	0.282680557720644	0.341853227373765	0.0463681313668978	0.0880871305679961	0.0645040368992122	0.216242228997965	0.196794920957458
2008201	9	0.370798993911321	0.0774333030399814	0.299572493057632	0.148345116297213	0.00683615272445199	0.234977593440754	0.0860643713715768	0.128512153701172	0.103670729303101	0.0411610266780259	0.141988045328422	0.21319545197411	0.271559089915515	0.300172091671354	0.0429440913259111	0.0903839035872758	0.0586522553284194	0.146720889639136	0.242239984327884
2008201	10	0.442953892783601	0.0941979234391132	0.268905857759726	0.108773152695239	0.0338817266287885	0.157122492172427	0.0541632085075437	0.0777364416651606	0.102559656901609	0.00706359240173384	0.122008476876249	0.224130469182538	0.24568696313874	0.247938337583557	0.0392680253451024	0.118448244228724	0.0485283194510315	0.105547443645684	0.237032176120369
2008201	11	0.484992435474839	0.125371440299112	0.240781625008874	0.0495536947523656	0.105529491252278	0.103575735089806	0.0325360794703203	0.0493170446925054	0.0982494464883544	0.0127389098442514	0.113172718983809	0.232361572031799	0.238362570311648	0.209467338197735	0.0364924181548082	0.144992279844905	0.0376072937770948	0.100435291486515	0.274030613434934
2008201	12	0.432018938255808	0.0961026403909622	0.226966231631532	0.0339895716885438	0.107790999262112	0.086251080583504	0.0211594322554024	0.0712601297103507	0.090019759845447	0.0788996960838855	0.115538501736465	0.241923151189378	0.229555320057154	0.188230616326885	0.0386358157534655	0.151983487068936	0.0317950843817912	0.101571114458301	0.293268749124154
2008201	13	0.40637008249806	0.0272007763718459	0.2031033311235	0.0419258659970262	0.0460180696270234	0.0908621859357038	0.0254489331880098	0.0710716153185034	0.0756803416630164	0.133310587504746	0.139895425900666	0.233235994124556	0.210983350478565	0.169547353433996	0.0380342055180754	0.155866453029336	0.0295739153038323	0.101014569145021	0.258436408143187
2008201	14	0.488573572858719	0.0475113808172501	0.15755667940693	0.0626543296765039	0.0273863186561057	0.0787985916905444	0.0370967943984252	0.0471318614741444	0.04611418489358	0.153015896707182	0.18396733106981	0.215931836940534	0.20012517856091	0.160818150385747	0.033945060816563	0.161003717709842	0.0276827944656793	0.0962177395924096	0.233519675601986
2008201	15	0.574312367416693	0.127475802021924	0.138654477723537	0.0884088709377948	0.0414765398423978	0.0447549484057874	0.045850434723565	0.0200279933068267	0.0274568260705556	0.179578842750982	0.218356651771587	0.197966768475836	0.197585811633084	0.156567959061071	0.0321672689437264	0.172427373567136	0.0233380235589483	0.0859513119563903	0.240447472864371
2008201	16	0.692917043203352	0.241332400128931	0.161670536208886	0.0757469453008963	0.0438286185423017	0.0945169887866818	0.0649363056084869	0.0143548341419131	0.0310808639727729	0.179554507097788	0.264527214821904	0.181438473112768	0.205245521621432	0.151290173181	0.0307578869981179	0.166775025520824	0.0182712334067857	0.0584877528263128	0.262936020516613
2008201	17	0.782066894595178	0.261190320907677	0.18930789205274	0.0583584411233237	0.0071607008890368	0.148475302308257	0.0867030078429106	0.0520470751228096	0.0352419637923132	0.166215383524319	0.282526023912508	0.166673312243443	0.205611234539153	0.139522221340745	0.0292357605167805	0.153114708540517	0.0163148302655516	0.0249040611027076	0.240213151801965
2008201	18	0.843403382326904	0.237104199375962	0.192637106003655	0.124657707254806	0.00924247706967433	0.154266671808343	0.0920545072872577	0.126082375050542	0.0359501465276652	0.143065525071951	0.288166763040363	0.149805349850642	0.180899080822797	0.10288974081186	0.0272258478669484	0.119307660610229	0.0160349228078951	0.0237116268228794	0.254850120653971
2008201	19	0.809404898421581	0.196282703265047	0.183873501494501	0.225647956460133	0.0736469475379359	0.155212601724768	0.102562951330573	0.133370680625708	0.0388169575362616	0.104891780005198	0.289182889738236	0.133480256709741	0.137416147397434	0.0332838297472672	0.027755157100519	0.089697663323887	0.016746377251825	0.0359025184514766	0.266626449539202
2008201	20	0.735735800620667	0.152988453611615	0.167280063078852	0.237359090895102	0.0886019890629012	0.144377917811547	0.111792131564883	0.162341584367391	0.0351828282256747	0.0879270488404149	0.285853600118026	0.127206043615027	0.136977446100752	0.0152489184285525	0.0290156573948155	0.0878561384368851	0.0253998826332978	0.039778427140897	0.24983744820759
2008201	21	0.719466828847625	0.0816336862396444	0.159142070565514	0.222815081017389	0.0756214337864046	0.113196378462434	0.103319227093182	0.163180070281745	0.0242369282580477	0.201791368601619	0.27368794698427	0.131393629117871	0.124435723050359	0.0163243279811205	0.0316734122096541	0.0902174835305087	0.0467204374703229	0.036641818557429	0.265778099911718
2008201	22	0.741214905294058	0.0662510355828076	0.154732203517998	0.209827282501154	0.0947117449823797	0.0853217039682861	0.127300038710276	0.117921633022618	0.0216571409490423	0.473189014073422	0.261916717027519	0.145047421736477	0.0601736912713228	0.0205375288244297	0.0424272607271663	0.096333888193724	0.0634715584026796	0.0293227862468803	0.332963121054962
2008201	23	0.780950014842785	0.0978494683128452	0.152321973855882	0.158096410378752	0.0921240894240761	0.0823997730428175	0.366963237120786	0.116100464482115	0.0538395554561308	0.580514014441898	0.257837441914635	0.153189207854103	0.0151891869977331	0.0394977686682876	0.0601891708740956	0.103582737062808	0.0331856267204419	0.0198167045025784	0.39335765410704
2008202	0	0.79002945712657	0.0953085406508606	0.150837084161434	0.0983242448126472	0.0843405133390338	0.113844307367118	0.459006465936598	0.176094325877706	0.0954033698689047	0.572522299612031	0.257172667937719	0.15000886741407	0.0113371062824468	0.0449110086634418	0.0661055616709028	0.102190672821695	0.0343113853633997	0.0133890184397361	0.426281345827728
2008202	1	0.629325099680486	0.086286814910895	0.151337745755213	0.0691287539837163	0.0881417856732217	0.143695325038828	0.457439790959885	0.172834694351511	0.150471922361488	0.558654213081006	0.261945954806263	0.143346155293317	0.00575749129907846	0.0438951984386007	0.0645790562476171	0.10151646515829	0.145891089917715	0.0168974539595693	0.428217185610157
2008202	2	0.47894425566545	0.0730618698035053	0.149434151561944	0.0776658652517089	0.108344219295191	0.131758401316408	0.432249500120343	0.128825332585738	0.297525965383759	0.537929007851658	0.270903126327474	0.139808166566594	0.00985458745015283	0.040909221638032	0.0611030025461217	0.101636572756084	0.236647046553334	0.0401832802145362	0.473967273896096
2008202	3	0.446848709365413	0.0538806736939063	0.145363246662721	0.0646941990248477	0.137435162423684	0.0716735042171287	0.382794947107345	0.131218853382851	0.432906795728605	0.523498724407488	0.280185971661556	0.141141032745928	0.0155722144611377	0.0272825713050393	0.0549334230960004	0.0898030452971232	0.202738104095714	0.0724400246903192	0.56987342400368
2008202	4	1.43616317602121	0.0487689101454268	0.139867802426079	0.0623481441807754	0.119001177343624	0.0472431031430597	0.291781938755482	0.183883231379589	0.419014025133597	0.47791638621065	0.279643676281751	0.141903283675798	0.0231383482798665	0.0106064550189399	0.0651581287987843	0.108414730993084	0.110777071033307	0.156638823208097	0.60640602606642
2008202	5	1.72667595850938	0.135364388435623	0.137010286343353	0.0531777212692813	0.104472686606026	0.0432069969610318	0.198627816983871	0.232580110067833	0.359091731024951	0.433392287693606	0.270839884389961	0.13142108032309	0.0228148983537171	0.0116808612997988	0.0860058044939576	0.131077235166184	0.108260005434347	0.316372737987676	0.556425485619781
2008202	6	1.68983475280877	0.267204474911247	0.199252771495825	0.03440428763903	0.134150211949422	0.041411937584323	0.180146999819847	0.626038722880649	0.275573084047049	0.466991716493137	0.226937329399367	0.0925675038062348	0.022412425528191	0.0199932918210645	0.0962506202428408	0.144105840637901	0.126027409144216	0.378264293096977	0.489217754404765
2008202	7	1.82372777874425	0.367153440456091	0.198348618590018	0.0193818087492325	0.124313849418335	0.0508860138068594	0.192807314286341	0.999123563100176	0.167018008563673	0.421418146795591	0.180983010401869	0.0354666962332183	0.0265512098714145	0.022681914250393	0.0874017117595622	0.142730272876015	0.158169506539266	0.362025766942158	0.471566287126845
2008202	8	1.86348088192442	0.398213522096759	0.178987295822705	0.155975284713218	0.409882074603935	0.0498364785759698	0.19272586902344	1.12535035831505	0.120458236880083	0.358542229788819	0.161585048468935	0.0118429284837569	0.0506562004738384	0.0252137855697517	0.0743243031559956	0.128980683172888	0.162189501662911	0.31399195563197	0.472957962294907
2008202	9	1.96001877544869	0.330167733997667	0.165081064902682	0.263487973706541	0.789334284482747	0.0497390562550742	0.331856629427129	1.24924185841642	0.129866469127931	0.50326641274154	0.151987296364228	0.00239181483412617	0.130882832464186	0.0253200949927729	0.0753933388922533	0.118240984072334	0.164133702640092	0.204707746654842	0.454367917190055
2008202	10	2.04059711767502	0.224244247373903	0.164094879991944	0.29164798613926	0.855218643874347	0.0522981041828032	0.726995015825669	1.45073180739673	0.132878304852703	0.776034650867522	0.146736528642736	0.000554720539481779	0.23696337592227	0.0277944804018335	0.0728655228593785	0.105073735403439	0.153503006872796	0.10871347462618	0.421762345431245
2008202	11	1.99448774148592	0.174943609043905	0.1690181248616	0.259677853039804	0.916244378501196	0.046793670724436	0.871934827068731	1.53050775238449	0.171428146577325	0.812764095106271	0.144432641947653	0.000171555147184949	0.312416619565023	0.0493101656913306	0.0704275505181831	0.0853039470384499	0.145759674043732	0.0704621922476736	0.396780902973673
2008202	12	1.4330973017969	0.170606787721592	0.170663434333476	0.187930689663582	0.85732912158398	0.0372947697804701	0.869177331388605	1.5292929422273	0.550027531153693	0.605932438157299	0.144097537329877	7.45314941362811e-05	0.295690696227798	0.0888340889050917	0.0708289428288581	0.0619854295438163	0.175381718106347	0.0468221356730708	0.442434275724143
2008202	13	0.632672880050933	0.145174055522631	0.172147906485932	0.133358900187445	0.517033833711707	0.0317384918139337	0.807945164561328	1.45202793883886	0.816706154911952	0.370385422992231	0.144096697059022	2.24566286300436e-05	0.258064034770708	0.113080941926458	0.080782298141773	0.0487012081384743	0.313746113176329	0.0537487581534078	0.509495063523179
2008202	14	0.366673460402124	0.116604757550615	0.176955721349468	0.108332499778599	0.380375425323007	0.0345913325046746	0.768176723232427	1.41918690154488	0.850765349587128	0.25256528268783	0.144303398554777	1.14562868311076e-05	0.238470197935107	0.110545405645001	0.0913159137565825	0.0513977653330063	0.60073005250695	0.256546837556312	0.599571767522584
2008202	15	0.613411075588976	0.136012286408986	0.185215226101345	0.101159681991554	0.371533786499138	0.0455323880539192	0.596871660468711	1.12289887191611	0.990244107718024	0.189152676466244	0.145219424234476	2.51085825466805e-06	0.212059079593471	0.107230127376689	0.106160865968837	0.0685984621248127	0.576797301152292	0.609815191968597	0.659598085335234
2008202	16	0.939371973943872	0.135348354341034	0.194663755733491	0.0957975811368407	0.361989670445797	0.0435875557850849	0.390588595567458	0.89076866923235	1.20120856181533	0.172412387929197	0.146692298765656	2.61626852681134e-06	0.189822547590174	0.0930255226502918	0.110881002705987	0.0829360003384675	0.543527477177702	0.77927320973105	0.689851784473158
2008202	17	1.43656810235039	0.119112041842537	0.20205510914046	0.0941932991294491	0.345808093657868	0.0387321937306764	0.248306756880384	0.574260622096079	1.23012088677873	0.16113486213794	0.14529130732333	3.53962463501494e-06	0.182009913314423	0.0862959418252338	0.108063227763365	0.0919597579924995	0.509743033787413	0.882876980217052	0.844583837018751
2008202	18	2.28537908459307	0.20873447157176	0.200081546148793	0.0919480209380647	0.305126496671627	0.0336285195051448	0.143785245546508	0.37484381359813	1.0589425949719	0.169753683640839	0.138056294075282	2.43434982597057e-06	0.160593261027338	0.0903888239878743	0.0991702316766905	0.0986663177769501	0.459385742169579	1.05136490428447	1.1071569346157
2008202	19	2.70044363037191	0.320742921954627	0.191320579565656	0.092693081385389	0.297287226891128	0.0302245796452249	0.120608623738035	0.360395747173431	0.733571148045898	0.204010972961844	0.118791176514787	4.40528597121054e-07	0.126436510283932	0.0978439478913342	0.0911071754834665	0.101302590865746	0.361999343472292	1.03872463791066	1.33467486639762
2008202	20	2.55687135962943	0.325423658295737	0.174706317231509	0.111843684574986	0.354729178741932	0.0278649077957368	0.122426896400869	0.555264359557854	0.504216181084107	0.37932916182479	0.0960757922086821	1.08584086842956e-06	0.10299823236692	0.0983126916162478	0.0806623130370117	0.103472000137215	0.226275340865664	0.877776092026715	1.19661316836736
2008202	21	2.13245569039952	0.330671959443155	0.164109248137306	0.166295718394006	0.438547316583642	0.0332015864414971	0.113236100140769	0.699196443184425	0.333074561169945	0.407683562639248	0.0837492434640952	1.96348267337525e-06	0.0808009366284407	0.0989298868845939	0.0658536865163586	0.108616430477963	0.114477243279478	0.616496708950734	1.10211119960977
2008202	22	1.48855203468463	0.348274021380867	0.134135825054708	0.197785738235941	0.464798743126542	0.0432924706575597	0.123003512057068	0.497973165241504	0.231996313231842	0.340773586368211	0.0796206731020196	0.000174364147758703	0.0633559717236693	0.105384685613829	0.0481769676936567	0.113581954101019	0.0819761063873596	0.388516688344677	1.55973702737705
2008202	23	0.817638204467519	0.420303029330505	0.0911719663016004	0.211130783650567	0.53294126971205	0.0486655275853357	0.129206234621673	0.368834032954999	0.166443239476928	0.266654231255721	0.0783377142398082	0.000600103309745495	0.0555722559162553	0.112135597036446	0.0326607585119982	0.120230393234875	0.07429455746997	0.247208574503818	1.97217717206729
2008203	0	0.35163517201565	0.44203313197289	0.0709692237355473	0.202407442157363	0.508611127356485	0.0462426719828586	0.112237621669045	0.41921110237724	0.127850923404573	0.210463535383037	0.0777771402264142	0.00114640324413383	0.0527222963147082	0.109610011112968	0.0225854345228058	0.127451312405974	0.0760037077870379	0.167213471360696	2.16627464955312
2008203	1	0.274472208130566	0.484552757880101	0.0798956212044417	0.182623698747533	0.55122919224838	0.043979359760043	0.0884005064866326	0.521909720157718	0.134945146603322	0.185541630894569	0.0744720441568872	0.00182931872291414	0.0577030265972687	0.115817811229788	0.0165424431324923	0.131305055358104	0.0743926104611137	0.114473657164669	1.74987891762278
2008203	2	0.394942755280509	0.474291456356678	0.0869825420737777	0.208699984327304	0.613670979768831	0.0455522787093281	0.0686021061290081	0.637082944096107	0.162948269386753	0.144119728166552	0.0675472991667087	0.00276304135978081	0.061198456340966	0.117844065426707	0.0132141863202214	0.132660633991768	0.0733059124284923	0.0879021336522521	2.18117699028846
2008203	3	0.534737012576772	0.523782433940744	0.0833151353166928	0.237364528470333	0.548080906622279	0.0509983104323319	0.0556616259952887	0.713907777816333	0.182797396274602	0.100370330145574	0.0625582824739191	0.0048508425056543	0.0433925984065075	0.10200062119407	0.0120106491302106	0.131157440501797	0.0733404026153977	0.0554159874962265	2.32324009318641
2008203	4	0.50686469580192	0.626502939273387	0.0728851254594587	0.24761731714029	0.40243054028027	0.0506574104699507	0.0576246194558512	0.747528470206613	0.211249009312034	0.0765856414253331	0.0631616695067246	0.00737621732000852	0.00732418748934593	0.0759152087510341	0.0101231636473744	0.12988000011881	0.0825569520041403	0.0345570814556996	2.2330248947772
2008203	5	0.348891344416898	0.663423708089171	0.0638626974795505	0.289799276791844	0.283141155417292	0.0611716189725943	0.0652119233694201	0.731271585804871	0.262241713259455	0.067178223471167	0.0679755391329167	0.0104186587902787	0.00182358862861261	0.0767849572633958	0.00695765722803141	0.131071399607439	0.0737779473996649	0.0245992323357756	1.95726070196532
2008203	6	0.239150220036411	0.614905284026692	0.0692593729779848	0.318026268580495	0.191738967009189	0.110258651205574	0.0710897978596285	0.593343394245391	0.296806812083929	0.0615229895539689	0.0742113956120351	0.013335587375169	0.00961662436077377	0.0776056142221384	0.00812122236537449	0.11971226038137	0.0852345723708412	0.02258771736884	1.94272479938935
2008203	7	0.230115045034106	0.264881791403466	0.0801248094257511	0.398948698759687	0.135561731071799	0.216155755189404	0.082340828671974	0.388156833467185	0.303854178652752	0.0549648780861283	0.080178256245048	0.0252708439657519	0.0873707911878166	0.0690398022367964	0.0141894501351635	0.0587674235860545	0.105642443517781	0.0411669517096905	1.64457774573258
2008203	8	0.170307239663925	0.0324889645191248	0.054035545962995	0.447265090797653	0.116994232194948	0.343795108115806	0.101686327133195	0.273270410592704	0.290666638475307	0.0518831260370371	0.0829540539683339	0.028411719199687	0.112616788657062	0.0574435386123375	0.030651182009971	0.0591234544627293	0.123085872824981	0.072644010459793	1.35866614809046
2008203	9	0.133359480758684	0.0227760737327823	0.0427435504821576	0.378021141591025	0.0956474624724999	0.458300975138225	0.120774332590911	0.229662975122806	0.28225978223565	0.0534106308854387	0.0831622407083283	0.0296308802772416	0.114416797619806	0.0481484213471895	0.035308052442389	0.0465943942292484	0.141821925901633	0.107609259804065	1.55198657210444
2008203	10	0.125214340554363	0.131409970512391	0.0375868862563571	0.189728993042554	0.0679300968060201	0.35723327734704	0.146794316523012	0.212250445684494	0.261862088506027	0.0537855000394868	0.0803398350886383	0.0339219054202208	0.103474152995152	0.0423273481196692	0.0357194838055863	0.0418108341498278	0.171393016033699	0.132800045199873	1.94717252190723
2008203	11	0.117278684238322	0.213932193613748	0.0323136218724632	0.0262406429514478	0.0473883605774271	0.280904390175207	0.172804300556561	0.214028861203308	0.244184943475065	0.0561785694811146	0.0684925968677761	0.0415497995787264	0.0959983363615838	0.039485164095442	0.0366987257801968	0.056091136688351	0.173934158383994	0.127902332390345	2.38373338635047
2008203	12	0.115214149964077	0.189198110960016	0.0319986136559485	0.010305487507559	0.0270667528748137	0.187433686261789	0.198533992626893	0.210548970339386	0.225898743233945	0.0563159365606423	0.0521080730194284	0.0541801767008796	0.0900399158875321	0.0392334232184359	0.0351267054555058	0.0858596373355711	0.164775244189209	0.107757763858639	2.39367411227934
2008203	13	0.120063477141984	0.12908021877512	0.0368592253848014	0.0125323994190426	0.0252552748854579	0.0731974915349201	0.218853911897824	0.206539961963175	0.220285722614776	0.0580146344187277	0.0419889709149418	0.0775330588134332	0.0857409950841093	0.0400240147936568	0.0329961747947678	0.10918023225106	0.169361754726993	0.0930435375102694	0.84335737253257
2008203	14	0.126938995070672	0.178056537357439	0.0501185896693047	0.0342304226538253	0.029560388938554	0.0729886566573923	0.196276946407541	0.210317365755319	0.215376095307637	0.0596505225296676	0.040806432266597	0.108936544634441	0.0819358966749412	0.0402236683967896	0.031070971758068	0.118196802027314	0.18501462305168	0.0858635392822826	0.514106564364445
2008203	15	0.135794565905261	0.213895453940485	0.0610998414702012	0.0449879192157169	0.0350616868077081	0.0719303105623379	0.16440103523869	0.212582707655717	0.205557267938176	0.0568005155376567	0.0433573059623348	0.135332197500042	0.0774538103824786	0.0401416875371964	0.0295708134704836	0.101638304879184	0.194152421910802	0.0822276337513178	1.26989877297825
2008203	16	0.145663237289779	0.154849532304141	0.0594691688082174	0.0305212768090517	0.0410629558046066	0.0331286747329154	0.136371202341994	0.203582183983904	0.193703986220443	0.0557275947599655	0.045271437638743	0.15412080621551	0.0729313442880762	0.0407111455283092	0.0284604800314953	0.0773428221782107	0.186206184549289	0.0765149005885065	2.36984789941142
2008203	17	0.163432135568986	0.113398712979681	0.053298343329348	0.027958799392892	0.0454221558779338	0.00783925753562573	0.116054229199049	0.184769690665557	0.176008212814407	0.0605362204542972	0.0494015895258511	0.152068550110344	0.0697983372016637	0.0378656034576281	0.02828992567691	0.0538540871241483	0.160720264513861	0.0703685854037987	2.57895381941158
2008203	18	0.193548088642125	0.0906763596950876	0.0489919553444607	0.0487186797920255	0.0465098604359973	0.0137468481162669	0.0982066097309773	0.185927853697655	0.152913515354433	0.0637642532186663	0.0549947833605523	0.139405632110039	0.0692450132807063	0.0226733532132718	0.0300990051828027	0.0407687962572171	0.145049874809052	0.0723504605349017	2.56188084692444
2008203	19	0.249234854986093	0.0520271287642142	0.0479106249612496	0.0580968715417407	0.0423756868469264	0.0516632814852336	0.0832447589197284	0.210668921831046	0.130723341607539	0.073283891388717	0.042414891143549	0.135245639764068	0.0691177684188449	0.017783814716532	0.0306843268856763	0.0370216218659646	0.13817485290778	0.0761828334826152	2.44654716920074
2008203	20	0.329102851879578	0.0339189931386658	0.0453465144603857	0.0505141613692541	0.0389117670849815	0.0760091960498299	0.0676496832376021	0.248009894213082	0.107428828614769	0.0927980202637255	0.0281662395302632	0.133842862896867	0.0683559942647168	0.0211236411769917	0.0291249935261263	0.0415084891320752	0.132231183091782	0.0756195592127811	2.21860794365347
2008203	21	0.439505575683087	0.0593798203905242	0.04071572547073	0.0372318475021823	0.0356766132137123	0.067188257990532	0.052199151259961	0.248553275327065	0.0855410434023157	0.111814432082293	0.0197617544017932	0.144350000499459	0.0664935939359534	0.0373001062837992	0.0295473275799366	0.0395282717474126	0.121431424565993	0.0723329912061448	2.21495821380797
2008203	22	0.574118129368587	0.124032129220099	0.0349087186368247	0.026816879246029	0.0345430983733193	0.0595438198101689	0.0417583292916212	0.195911539456798	0.0695615153939989	0.167772659261444	0.0178308497487225	0.158243490764675	0.0632402435736638	0.0544661022480841	0.0292562700565028	0.027817257287958	0.109401798656749	0.0671276221866537	2.2132424380599
2008203	23	0.668472909571651	0.141380741433167	0.0298598612441219	0.0227340906023465	0.0457430543275234	0.0335606634306358	0.0366003571252267	0.13954432155514	0.0622089287117762	0.33984660861941	0.017030970353054	0.161965150094297	0.0595683077302247	0.0722061926696048	0.0286006731997035	0.00963840974450183	0.0983043252945544	0.060002853653029	2.14822026519473
2008204	0	0.849774660423418	0.149284790935569	0.0266625259444598	0.0214701272032027	0.0956891081880122	0.000825034285558774	0.0363233338189117	0.122048784206075	0.0592068930988883	0.604390464697205	0.0139457770161813	0.157388187479966	0.0562885844454665	0.0940972973005101	0.0279495824473257	0.00463736157907401	0.0890926493165074	0.0534531413679898	2.14905740852378
2008204	1	1.11257571074741	0.163670527208342	0.0256035592608835	0.022902071443408	0.117589172494095	0.00881060096876417	0.0355631265939703	0.116108008062748	0.059478712833593	1.2674708291485	0.00886735696403011	0.149128648927234	0.0544473260300611	0.10585559363055	0.026324155469146	0.00374340444172827	0.0805443751298407	0.0498613212260882	2.10771807744505
2008204	2	1.69613331801038	0.176943960128554	0.0250555085148897	0.0257213006043181	0.11251216289994	0.0450645718370878	0.0398440744465498	0.110462474515186	0.0605628837208089	1.76167444378556	0.00750198143111794	0.14168444507912	0.0516460420689623	0.105727255153845	0.0239673090158414	0.00385387027936602	0.0731190683996631	0.0488512434754525	2.05446837398626
2008204	3	2.62303019122285	0.179936530685786	0.0240035746841142	0.0268573017370146	0.108498223766858	0.08446365313893	0.0856182721722367	0.105738139038616	0.0608689700682956	2.01962614973388	0.00829852110668422	0.138958100562852	0.0496650214420076	0.105906904470027	0.0216054031780978	0.0048329415145315	0.0664241915436585	0.0489014640220345	1.98971065529822
2008204	4	2.77299008353234	0.180508976174023	0.0228852632926697	0.0267375996530427	0.107767771131848	0.0856639907662707	0.447114279619376	0.103047802342374	0.0602446400495869	1.96824281715213	0.0106665252028788	0.13103824132109	0.0493096111149374	0.106912571500839	0.0188327342529678	0.00573703178849246	0.0590542935430989	0.0495690555904417	1.86133857956262
2008204	5	2.79022106802051	0.17232406039468	0.02546001161609	0.0264527203242691	0.109163270441497	0.0650159792700905	1.40663046659574	0.0999542845500069	0.0591285702949296	1.93655470757724	0.0151590445125164	0.116581704716712	0.0486955049233349	0.119206568934389	0.0197960684612422	0.0060667150386493	0.0485692778643811	0.0507538140383627	1.81392575504181
2008204	6	2.7168025351632	0.145491571530009	0.0276775767434018	0.028051076262254	0.110771573096581	0.0425777925523029	1.41629098954146	0.0927297082233648	0.0587241496654003	1.91222003574565	0.0178107506062376	0.107491757604514	0.0493985870699794	0.132912168881499	0.0210048381146877	0.00561362377050055	0.0356068066691032	0.051150079907698	1.9156283684092
2008204	7	2.58139679271802	0.123986863374464	0.0343200372373374	0.147010392108392	0.113681391130007	0.0324454000812724	1.31346934231138	0.0831972207472258	0.0625523489298298	1.90710631408445	0.0156151728727974	0.105365955951989	0.0545233582789109	0.135030191337723	0.0265181539355788	0.00485343068803893	0.0286091001241004	0.0530193582445437	1.86006754149737
2008204	8	2.49856518745809	0.104764418453552	0.0419138789082819	0.238364044908489	0.120610064747452	0.0371329863168671	1.09589049011912	0.0849960751412826	0.0792777597964292	1.75300994192656	0.00738494583413044	0.101112444831308	0.0577171658137151	0.118365513050432	0.0430890071655081	0.0036854893028979	0.0308444565906288	0.0547537550836366	1.5208281736768
2008204	9	2.32656326561118	0.0918987691262478	0.053465987615936	0.20402362285079	0.120381817061216	0.0584508831768927	1.06846049909905	0.186045786462512	0.107658319934018	1.65180066037957	0.00513563633270133	0.0983280690221692	0.0567435200217787	0.0768389816610619	0.0620728569630517	0.00258393008856256	0.0273896895158556	0.056923523721651	1.06840010752031
2008204	10	2.16195046512513	0.0841503287744295	0.0753001404758757	0.126124446528084	0.111349077406279	0.0986395896417331	1.06088062429053	0.54136108102724	0.168810692507811	1.47673280042956	0.00654100454124904	0.0985911761130101	0.0551103554300208	0.0517060413679077	0.0663979389718549	0.0022165612910344	0.0297163961226109	0.061766462873986	0.708167277171367
2008204	11	2.06548615288945	0.0774781386449351	0.141500760593605	0.0854036712771638	0.0995998342452906	0.138350770065205	0.983125690176034	0.930421412935813	0.246403645698797	1.2177717811086	0.0292965842670617	0.0974202580106338	0.0511817508808188	0.0340117711683867	0.0657189100527007	0.00141953099257833	0.0306616742597976	0.0784231770545515	0.511903918108969
2008204	12	1.94333722897096	0.0965967849038443	0.178690407612087	0.0735642992406628	0.0867187799999183	0.143234051480987	0.843500716581352	1.13392740037671	0.31944874732926	1.08071419974509	0.104931772244708	0.0961962440804692	0.0464919043192709	0.0244966923652214	0.0629852951383241	0.000943958660203534	0.0318828495630107	0.118421889997813	0.337335766180514
2008204	13	1.72162217096836	0.228119804643795	0.226912648200944	0.0739957009452242	0.0760551631422324	0.134755158025853	0.6783328367813	1.142854203189	0.390843605581242	0.946090350181008	0.190194865966155	0.0978071771919487	0.04255034175241	0.021672818015318	0.0598071524658184	0.000980035688916467	0.0328079266741461	0.190714520063151	0.227540952108521
2008204	14	1.44161869408472	0.385575767757784	0.278489245576444	0.0696904034312544	0.07450820728087	0.126245832983404	0.577668067816131	1.09392059158622	0.480170635445271	0.798218846315795	0.215437600236105	0.105342791537316	0.0398495835688984	0.0211291955051925	0.0562309922562574	0.00138550927580502	0.0336295687291396	0.283879626148494	0.176328371140345
2008204	15	1.23590501194385	0.528744996939046	0.32304209566761	0.0654546990138237	0.0956669925020884	0.102687902496694	0.508384942615446	1.01308866475499	0.59999592399541	0.695286637279857	0.217295113605273	0.11766658931129	0.03888217560458	0.021663188787232	0.0513348409921988	0.00273536466713752	0.0347302928860189	0.374686475395182	0.215778493244509
2008204	16	1.11774022704991	0.710783190972902	0.358036406236142	0.0629081927959556	0.327122312957799	0.0702330328072547	0.485975827092002	0.842316243551387	0.672828126705589	0.643949316980866	0.182392904708002	0.119537056127025	0.0410850597608729	0.0225185742888068	0.0453664718924472	0.00466195720044946	0.0374144897157836	0.450016069311024	0.339103340272949
2008204	17	1.33872958910808	0.857540412726802	0.392736069948773	0.0608782509653052	0.760248946469265	0.0606932276115338	0.502488247723805	0.586740896676105	0.68660372866363	0.626527719904494	0.122433661255854	0.0978588924438399	0.052179299183324	0.0227941940427827	0.0387514167428371	0.00513337153059849	0.0396647596374851	0.498342236452366	0.385984014863969
2008204	18	1.50603162929948	0.923230388731266	0.423333303398779	0.0595775322909225	0.883355855802985	0.0575868119665839	0.493435595468615	0.447561839192036	0.592143422149908	0.610826752826692	0.0807368610729945	0.0676561377292123	0.0720755397944809	0.0223527024943145	0.0330705667029825	0.00491077124980053	0.0404633195772082	0.514892546800598	0.414726749020349
2008204	19	1.43971998932791	0.927309702943489	0.465117871974931	0.0586682337409039	0.814308595256622	0.0545008199555768	0.488010768123575	0.381426645999122	0.534487616197641	0.626246965533581	0.0554309525851962	0.0496406295380085	0.0836090393886418	0.0209650494192975	0.0295727341188795	0.0048406395287349	0.0399485377817401	0.522109568161281	0.429514509899288
2008204	20	1.17479454430699	0.903293513221175	0.526195047341767	0.077076592855218	0.728212143822053	0.0503323145833928	0.489424597110527	0.345032073083368	0.542496213004363	0.586044210037723	0.0543756409312275	0.0415123569485788	0.0964270067068902	0.0185212952339907	0.0265315643063917	0.00548221369682264	0.039585506782379	0.532597471383508	0.407452978989873
2008204	21	0.752600104574108	0.881617366860341	0.565005390594456	0.25401749515448	0.653236949229746	0.0571995650363943	0.482430379130508	0.403185410006156	0.643468695986783	0.456757063957979	0.0584140704916779	0.0371942365607525	0.123550897900176	0.0164191758081327	0.0225660358788879	0.0213565718392486	0.0398254725705771	0.532215266688936	0.367816635178749
2008204	22	0.64312000907171	0.863218495886816	0.579963414270609	0.588074713948045	0.550032828091754	0.156316119430682	0.448532065735179	0.451184772932518	0.751433657924967	0.397676932079513	0.0621835694016428	0.0466347539896945	0.166112350502406	0.014724269153694	0.0187354036615817	0.0251863802937653	0.04088570181422	0.609070356830176	0.306188893796205
2008204	23	0.631265521061938	0.845902143068186	0.573657852435303	0.762193379924971	0.483206409346464	0.448817041842958	0.402763997040777	0.423184626146244	0.767789918040992	0.437736125493476	0.0660211199728726	0.0591491813822678	0.214902697410368	0.0133561275659482	0.0165543455653234	0.0378787262603512	0.042662813098999	0.791861965468179	0.248205160961499
2008205	0	0.640089045646715	0.811571986882698	0.564000276151112	0.789551174533119	0.388620957703087	0.690413503470378	0.391883264246649	0.414259823835872	0.7270594119019	0.889829997429693	0.0722334963371521	0.0747185619128627	0.26252474843872	0.012276931136699	0.0160319279717686	0.0420130609236909	0.044812093126396	0.806304377973761	0.215523502015682
2008205	1	0.564447672668676	0.76534346097793	0.55542911643183	0.787257040035443	0.330174567415299	0.787266003756544	0.543231521830241	0.476431699850306	0.571875583127835	1.64104830580492	0.080579465171392	0.101274303398288	0.28976708733582	0.0114816519673229	0.0161171854214756	0.0442273221948522	0.0457770202774814	0.770587394693049	0.198983306075856
2008205	2	0.528357245779295	0.7359417845694	0.548225803668994	0.775881761623661	0.298468232110069	0.811627927433305	0.96937457792124	0.585072788877605	0.531103856244745	2.36793890639904	0.0824248841373058	0.136199466985154	0.289165436803481	0.0109666595166109	0.015732267587226	0.0478984147434157	0.0448766085143796	0.737948384359614	0.187849861912347
2008205	3	0.565503492754869	0.73985471640529	0.540746225458723	0.760080658266806	0.279927636299482	0.812650500756673	1.56172048058544	0.673921006214018	0.541947845663058	2.59988660474281	0.081868825525187	0.190841276916759	0.282558045800384	0.0108297375171854	0.0151304572550075	0.054127583112907	0.0445384627623759	0.7372421966858	0.177945162020349
2008205	4	0.984498766886569	0.753941234822345	0.530085922451509	0.730038005449819	0.27227975394377	0.809393252499596	2.04866409299433	0.753474733004328	0.631766080659178	2.62190423357373	0.0777480916225292	0.221886348187906	0.273915596644118	0.0113308023399672	0.0144062038069113	0.0644152211058994	0.0451233349411222	0.797125215417327	0.169300013845087
2008205	5	2.2855498433346	0.768280446426174	0.516042643700223	0.704582936452863	0.270820642759297	0.804070277235364	2.0967363286728	0.808871111005285	0.878920703641858	2.25871897272742	0.0662148500098392	0.21469928665004	0.264247321119843	0.0143103616966767	0.0137000011263526	0.0779027324204329	0.0467538935630504	0.954834956195473	0.162485563178528
2008205	6	2.79891670506408	0.840766956501516	0.694672609028291	0.619766282021831	0.27668806324665	0.790536565876142	1.97661797128425	0.852897228217452	1.23348093492061	1.92423601443496	0.0528213581819163	0.208977627713141	0.262318947213075	0.0386690829993206	0.0132553229740944	0.084145107373097	0.0499346305713795	1.16255517970783	0.159733447251655
2008205	7	2.77454337578975	1.00609943772078	0.610433145798471	0.584288891465732	0.29017363084654	0.769017115498666	1.67695954037191	0.843622162992772	1.57249518724415	1.64867011993522	0.0468200551532472	0.178333042013542	0.260852827724843	0.0436878540699154	0.0138365782614209	0.0855164333315714	0.0595876894958886	1.37496751840022	0.183194790996571
2008205	8	2.68617368001036	0.720195804955459	0.515612805480558	0.551039501843186	0.307657896977437	0.739727997792294	1.48241668892608	0.820571855643365	1.74440630202662	1.52049353463139	0.0458821691155321	0.124755241382407	0.252282691566953	0.0348866688017815	0.0139143099927321	0.0743620703872924	0.0796048702926846	1.5597767938094	0.341713905246732
2008205	9	2.41712474761737	0.505302988051812	0.458693932592211	0.441779745327794	0.326531195948853	0.556851794726656	1.24048312057588	0.777581002290026	1.74484327383013	1.47930184587368	0.0513401686651142	0.079737670739153	0.19017225999403	0.0333068867374899	0.0131679802085198	0.0623367556580651	0.0860014466688847	1.63618787746528	0.670138265170222
2008205	10	2.19439763225797	0.472255396235621	0.392532671208649	0.324860688304368	0.340472909759373	0.484160880519878	1.18496275700135	0.69315143071045	1.72509722472001	1.40694992620808	0.0578938150640664	0.0625449927638822	0.152432483781933	0.0578211480408376	0.0124595858684267	0.0528615855277906	0.080528783839365	1.64277619138697	0.779809662663951
2008205	11	2.04507348526171	0.45087241870129	0.341234578220465	0.268712156756417	0.34644067740951	0.437026331316426	1.1597978831331	0.601105104027469	1.6693060610093	1.51160009255553	0.0604286749439628	0.053388487653773	0.122760651645348	0.0598461354900417	0.0121912314788832	0.0437266884300543	0.0700176844536436	1.62980032318694	0.714745558069281
2008205	12	1.93612663778576	0.415916053036224	0.301620377380318	0.230788410767375	0.35214889539177	0.428630070952379	1.07252197988207	0.578431309638989	1.5500032003503	1.71273357222346	0.0622777348205499	0.0454819972352407	0.103376903360958	0.0569419838694679	0.012426117405199	0.0325664868259629	0.0593559476021414	1.61378499209484	0.645236636205461
2008205	13	1.88898603069558	0.386250108726677	0.266291470294861	0.205411285257933	0.361096561096436	0.432069440193715	0.933963529631453	0.612078309002263	1.39754238652375	1.8328380195261	0.0773716507502738	0.0375913787888103	0.0963646183127778	0.0560720648237421	0.0120433209752219	0.0263882107213053	0.049897800203446	1.58972579616256	0.592622399709772
2008205	14	1.85949665791599	0.366082127170273	0.240676902932824	0.1852284804168	0.367884797840849	0.42331801598735	1.02200584968388	0.835060133896449	1.2487129079512	1.89941077842768	0.158367858505115	0.0318683896686938	0.0908656563506378	0.0541899949719858	0.0113854898387055	0.0248478954237332	0.0457976801826553	1.54715706452501	0.561879343186928
2008205	15	1.81059030875561	0.342568121899763	0.219224660703356	0.172670562307014	0.375539402806803	0.404603986281924	1.15669086276064	1.194530358471	1.13206694301997	1.93571852120964	0.279099638638933	0.0291053972438771	0.0851363244319145	0.0518493947687894	0.0110762914938724	0.0220198395526574	0.0413823235310127	1.48051518044018	0.532948920867392
2008205	16	1.75986791211128	0.314978210800366	0.203421938868776	0.165029109066294	0.378002109714929	0.369424927502272	1.26881309667945	1.37370001863802	1.06241928285305	1.95895119110009	0.34043562759076	0.0284948062222652	0.0787344561146149	0.0491762795171483	0.0112290788545626	0.020180387046999	0.03799933489625	1.37568282453514	0.513264871481924
2008205	17	1.73648210266133	0.297911375171832	0.194147423021792	0.159730734531536	0.374250776529434	0.347848560647708	1.33921023706655	1.40027879513076	1.01472820411083	1.99732889213057	0.344339736686533	0.0318092686879961	0.0701693095088588	0.0471175969730193	0.01131488734894	0.0180173927194592	0.0348714066383245	1.26386475029581	0.507392793306556
2008205	18	1.72973328700332	0.290678221261161	0.194014693251041	0.168124286296685	0.381908774223897	0.332474434045658	1.3959557369701	1.38349351860053	0.978638400769138	2.05370734868314	0.323580694076889	0.038333016192528	0.0607109231788329	0.0467474993303528	0.0112508306581019	0.0182481055002379	0.0315613494794219	1.18630454571771	0.509471018298587
2008205	19	1.73334915621251	0.299464511776564	0.201077425639851	0.199893614815254	0.429797151234464	0.319678686069612	1.4394910357818	1.36599722944681	0.951704992020356	2.112700848674	0.328603536536711	0.042212834206056	0.0549980773426985	0.0449091371329168	0.011039324388103	0.0191643655891499	0.0280697303094565	1.14614537826287	0.508047397525244
2008205	20	1.73670228931615	0.340094961558142	0.227820005777533	0.226905164852227	0.551393977271313	0.295072685347347	1.47673675992511	1.35052102365374	0.930272513606588	2.13422156802529	0.34207104213019	0.044601119782478	0.0523437805937819	0.0432919349415549	0.0105751851264536	0.0196798236325787	0.0238819939023089	1.13470562467993	0.508373930550859
2008205	21	1.74025462199561	0.369512321036619	0.260423556299708	0.246203266933016	0.59581459882838	0.253921560208843	1.51424039665643	1.27512691329388	0.912752243202066	2.11273962531877	0.34671916562214	0.0457930561064605	0.0503761274244423	0.0413962404039755	0.0097650046571366	0.0179388819652093	0.0201784826580111	1.13916068087203	0.540050949484785
2008205	22	1.74815555282182	0.379393226415361	0.265161911631747	0.263339773010145	0.58214503452687	0.207252591211473	1.54855912456273	1.17907288372955	0.898300552398594	2.04452452285407	0.342834808628893	0.0451677140858359	0.0484303657602347	0.0388113054369752	0.00834835456523805	0.012748772154655	0.0175344660244545	1.14924712580484	0.609732225147828
2008205	23	1.75969419291913	0.376246508170719	0.256157338708261	0.275463905116901	0.573829286545032	0.207993187150215	1.56757751215451	1.09623633479407	0.90360492124157	1.94851527806178	0.334171380159091	0.0456422555025938	0.0472295835170246	0.0350611981645072	0.00784378791826437	0.00942580346615306	0.017843965380077	1.15430350963783	0.611447091254057
2008206	0	1.76890667159911	0.359422560722091	0.237615640667851	0.282520534693903	0.573370976443133	0.203028722520111	1.5289363750193	1.05116644759633	0.997804753052113	1.86165365539071	0.324465460202579	0.0530122775549289	0.0469205240996658	0.0300359350195366	0.00754572141740854	0.00873031246718337	0.0215399417947348	1.15398928580029	0.569193439070092
2008206	1	1.76584739301064	0.342586867750631	0.225340046498747	0.280641390388218	0.598526724319398	0.182306568979569	1.4665097621608	1.02223959979359	1.11391463625165	1.77547418915676	0.315640404234047	0.0701042255738367	0.0475423387854462	0.0241502409981706	0.00734143275763598	0.00935006398062126	0.0368566144697147	1.14524326001836	0.552813239802534
2008206	2	1.7183380359106	0.331278133714444	0.22924470001177	0.261910368998757	0.63395206757922	0.149919242017995	1.40564208899576	1.00844954747492	1.13417933596933	1.68861491425901	0.316087026040183	0.160365240674578	0.0491607883272552	0.0183664152260674	0.0066620009400796	0.0115024564039335	0.0545837957638022	1.05225336903101	0.575416631537576
2008206	3	1.59538048372132	0.326614785695675	0.243838006760526	0.244147360796301	0.552390213150867	0.112954708948106	1.34654206714266	1.01828590921784	1.11992538655624	1.60224390194476	0.330166031316874	0.288463692502336	0.0516263841021826	0.0141383147217512	0.00658661213140275	0.0152763869473869	0.0606626985223358	0.856092565005892	0.50978397602766
2008206	4	1.50188442061145	0.330207906761116	0.245999923791291	0.229895835075371	0.305173174549951	0.080977540015118	1.28243700609913	1.05533051944478	1.0465990436587	1.51877698642523	0.355768419886571	0.309670132059769	0.0612891915678132	0.01183853818837	0.00511888621808622	0.0172402417585651	0.0605334633745068	0.62302855856024	0.381764366381074
2008206	5	1.3940777921202	0.359203710094248	0.236356052981142	0.184842358560941	0.155890746019575	0.0442585556378729	1.21404294380139	1.05910785239024	0.812737252062193	1.45562040654416	0.384551150339434	0.321876005253862	0.106904615726122	0.0102203014624385	0.00484204890276851	0.0171642660842746	0.0567532376870117	0.462983338399595	0.342986546394527
2008206	6	1.30630692388798	0.406002331252651	0.202267616133194	0.0800724683776818	0.107744635728582	0.0237926306111107	1.36454618616162	1.03534411290465	0.534670769874077	1.95397215937651	0.405949907728157	0.320888625837859	0.32416879412609	0.014206376182108	0.00562520267949717	0.0174843811458263	0.0634067284621872	0.395939176010435	0.351643219925283
2008206	7	1.22878320389258	0.342711608468147	0.148563498339691	0.0339121793503226	0.0966583007655478	0.0171666011200316	1.05784326380371	0.937912103446909	0.33941962494509	1.82428532905849	0.41834467489405	0.300246820850929	0.627709601897051	0.0205423108332693	0.00651744056188688	0.016984083635583	0.0863390468789718	0.3576454166887	0.304807269364169
2008206	8	1.12922137834585	0.244356278998879	0.0894802976510725	0.0183394691806306	0.0953749448245773	0.0165814190736371	0.879897821400027	0.776665295506862	0.277372110351153	1.30519183077231	0.425868132299408	0.262588074438307	0.555109498383014	0.0236044137987971	0.00768426391349434	0.0164514445805914	0.13717342558676	0.309139643083218	0.284653853598004
2008206	9	1.05291657215133	0.155044877289048	0.060275855480289	0.0172660177101939	0.0780145834989042	0.0231337666791235	0.634668693308915	0.640153658177911	0.253159312667079	1.06106488298142	0.426314572245193	0.218026145427791	0.482168855364383	0.0284909646777338	0.00745151348080706	0.0157333507829907	0.18884606875594	0.274202575790243	0.286761501766528
2008206	10	0.984901105772579	0.0972936486751452	0.0463996085787327	0.0185020460788655	0.0424681086298509	0.0283671526227376	0.503167163935337	0.436884258550824	0.241128299911072	0.84473805055691	0.412442034093741	0.172794687668496	0.43352272279278	0.0434990817191847	0.00725060788810986	0.0146777656720498	0.23088711242896	0.247551814572682	0.286081829370435
2008206	11	0.908175792981873	0.0627841529063149	0.0397227173913866	0.0213246573810199	0.0336261859438363	0.0300643739381045	0.422860440987827	0.249864710226927	0.232387726149646	0.622264795178929	0.388727289575788	0.130408145037907	0.393664255195919	0.0630874953094473	0.0061138597372965	0.0133883301211098	0.281386562059704	0.227140629849798	0.269918694232125
2008206	12	0.817713078736676	0.0393942589680603	0.0364295577548344	0.0273599330271561	0.0366397543260425	0.0276229311060927	0.325558061238949	0.123205846429965	0.224053255387503	0.538868648179914	0.35625590389525	0.0923902432555411	0.343185282456491	0.0804129141935648	0.00323249286981484	0.0114220420799123	0.31965173367314	0.209057996040461	0.249454982694573
2008206	13	0.738008589892225	0.0240398170355386	0.0328038840670557	0.0381993198804857	0.0550597333122816	0.0236161507432591	0.242705106028297	0.0692429283180963	0.214433646929029	0.491964312228922	0.316298589227372	0.0597666758237573	0.308917855956259	0.0971941341407888	0.00140353678802082	0.0098607065669358	0.392806240922582	0.191213405767474	0.213956445278138
2008206	14	0.653217355464646	0.0190812415332541	0.0274867220312377	0.0555191905805492	0.126380119463442	0.0194994931455344	0.200774084708424	0.0397631552494269	0.200659557410146	0.417205775771713	0.273298574235942	0.0410186234224848	0.284122123670394	0.10927061549311	0.00132358933389601	0.00870157506270527	0.497627683064588	0.168734288535288	0.185714836483765
2008206	15	0.534648869456826	0.0189121437712459	0.0237123015741746	0.077186664022465	0.224479110624784	0.016728133818121	0.177659151191053	0.0319726013505207	0.181204530221974	0.317726982577304	0.235798254403426	0.0351248380327489	0.267228144294529	0.117691283263106	0.00124255870884339	0.00803145358209848	0.57802644055753	0.138986124132329	0.167812648116923
2008206	16	0.336775489284869	0.020676942102584	0.0237041885049383	0.10509904433267	0.334838026079844	0.0156415462329263	0.15125923948054	0.0453928326773552	0.151842290829645	0.21752424211501	0.216336251331824	0.0346403364416997	0.257260759496838	0.122174218119717	0.00141507237108527	0.00723118261976685	0.645746871499909	0.107911139099007	0.155578913046433
2008206	17	0.161632285986906	0.0321116478407608	0.0251135831222783	0.133538189420483	0.476674424925609	0.0156453285775506	0.109500427044038	0.133257377757714	0.105604544693864	0.169547820312041	0.211962028519779	0.0479387298163071	0.255276644083126	0.120573114439377	0.0020161492020745	0.00640189302948367	0.711267542511853	0.0812555318312826	0.144397821580555
2008206	18	0.0716190364517829	0.0565211269386933	0.0259864394697005	0.158791485112289	0.553422527464734	0.0165180442641156	0.0774703199355835	0.245401432286908	0.0755907311154149	0.150769542302828	0.236105542525582	0.140785927131649	0.251734659360789	0.118906790291934	0.00283141310677981	0.00538619745015793	0.768151823602361	0.0644854983093331	0.123834200724642
2008206	19	0.0329204210613994	0.0761983358579791	0.0263054156995588	0.183055696108999	0.641300204272959	0.0165448806360832	0.0715861316922663	0.341266173295027	0.0664863016088364	0.120671061872882	0.269870028756719	0.238521707327301	0.24541278953767	0.113944383990882	0.0034566613795401	0.00416959842711769	0.740688030649774	0.057001540433088	0.0888720106118794
2008206	20	0.043273421684109	0.102513178139939	0.0258744255771848	0.177995445146445	0.698199969989286	0.014043858234933	0.0875284862482314	0.4226033988236	0.064525112226143	0.0809695907751175	0.298951226805211	0.292127025160963	0.239008757768811	0.10923092599174	0.00394253124992258	0.00349443306925085	0.714033992935662	0.0552822498949467	0.0576062614017726
2008206	21	0.156411872708724	0.139910639961614	0.0244182007045744	0.134524469535628	0.75811883545862	0.0130978429543006	0.114021137664636	0.522667550618403	0.0600347785928457	0.0714435579867329	0.23800843307116	0.326681045798199	0.234911793411536	0.103755670538121	0.00434665147110924	0.00375574884870233	0.712812085575982	0.0575022410994543	0.0430124193467623
2008206	22	0.220350608241774	0.17057023988645	0.0221167804976208	0.118915290449545	0.841513014353637	0.0137278021617542	0.116625862721503	0.5847898177742	0.0616971084061064	0.0720828287717729	0.209932102581788	0.341713821571572	0.22983453650675	0.097206573743281	0.00453626877760778	0.00695334183362455	0.734958354854053	0.0582882779549325	0.0368403927428505
2008206	23	0.272712139026848	0.191318155226323	0.0195339307419424	0.128725959209784	0.926335311389849	0.0151946211887119	0.0989072771243533	0.624243240117799	0.0802105941092552	0.0877473352312663	0.263652868896207	0.357970895049809	0.224180550631324	0.0893390031655887	0.004320587124433	0.00811874721080238	0.735754120744069	0.0560879788059224	0.0317487089867143
2008207	0	0.357803480456194	0.163024373530884	0.0177896939562303	0.160132099272946	1.02321727728762	0.0166571502112279	0.0662084211650569	0.652515815331887	0.102529207734649	0.107023425804431	0.306308471473667	0.398797230109262	0.219068169945049	0.0806341007200932	0.00378714360938411	0.00857325526325581	0.731308085400222	0.0514294135504812	0.0270249533602837
2008207	1	0.391324797042994	0.114435919685462	0.0159381203155772	0.215068471713427	1.07096831419459	0.0171382509953151	0.0655698230058646	0.698655564446197	0.108046531962449	0.105570818180646	0.324847978338913	0.419284527711719	0.211241067172012	0.0723309155118502	0.00272496809411082	0.00877099635875486	0.725160011024253	0.0477821133917698	0.0212343361539493
2008207	2	0.37529662876647	0.110914856798939	0.0142853052422319	0.270051068904043	1.09391421445396	0.0163168413261668	0.0902859340148256	0.766169074214726	0.100327158386837	0.084859201601285	0.350290468202954	0.424856565543271	0.200718502973108	0.0651071815103084	0.00177359725331002	0.00857447719995928	0.695071664891336	0.0466380849632	0.0133574661613787
2008207	3	0.370992964930003	0.126130674624329	0.0129410510983824	0.310075962539942	1.09587749775972	0.013715146747065	0.107778306877833	0.81755963541175	0.0955838394109674	0.0696741518663902	0.390811750682762	0.427135448053878	0.191600165565178	0.0590187993196225	0.00122562695477199	0.0087421344214729	0.644251801295329	0.0516329082772129	0.0097459318940403
2008207	4	0.375312742136187	0.151556408975724	0.0118280606394147	0.327659669873785	1.07305396752798	0.0124996806913027	0.116416020296142	0.863638014260693	0.098946624396951	0.0877224588433641	0.463405244970487	0.43018992774223	0.182566467320219	0.0542142029197003	0.000862376197579248	0.00927054658214372	0.608303843639846	0.0511456956584509	0.00852107030469682
2008207	5	0.406546384351795	0.185875558542838	0.0110631233812645	0.324420328064951	1.06860984785134	0.0168117471551909	0.118280899156356	0.916599208409878	0.127368488313023	0.110908411112308	0.558384480157399	0.431858721148466	0.169233096723987	0.0511355319677995	0.000663541060612838	0.00918588360155043	0.600261261979318	0.049281957927599	0.00780682993029602
2008207	6	0.460492731566588	0.215121637149006	0.0141722012415923	0.308387298462984	1.08875088397849	0.0310103682653887	0.137747505726037	0.935822551095591	0.173396514608143	0.11541154562377	0.635108901836832	0.427206966261432	0.0874483932921115	0.0492965005385966	0.000589995817320476	0.00836898275291055	0.595192841879322	0.0636145893517843	0.00914054419217644
2008207	7	0.526179769877692	0.217231331612664	0.0172434349925498	0.27306027268672	1.10005283107661	0.0528972056968742	0.198334278198218	0.903637309983251	0.194350773448109	0.122415171655321	0.617015066791218	0.419877131843912	0.0605279936799061	0.0501151558975815	0.00049723948944491	0.00655895653496083	0.564364568482423	0.0911559220056661	0.0107533785787362
2008207	8	0.597976212291157	0.178112678843349	0.0159226977930455	0.230887187028417	1.07260344107699	0.0759079547146786	0.242029031610848	0.847697617514145	0.201817084766616	0.176173564970183	0.549230688990994	0.39756169664714	0.0405930774338147	0.0374624762068524	0.000324570059867962	0.00503627447777642	0.529540552459652	0.116218010685435	0.0102043896354366
2008207	9	0.649656712074964	0.152787784307553	0.0142903377560013	0.146085650040578	1.0135190184957	0.0878677792385545	0.276271426107695	0.830826462607239	0.197770853333155	0.211564009261423	0.471766245631859	0.345294688991198	0.0329569887244822	0.0372347740277224	0.000253671780355736	0.00395038160357616	0.499524407051949	0.119601419321906	0.00885077819052757
2008207	10	0.607829386069721	0.15875006507528	0.014724295227768	0.0993909266728345	0.908475470335368	0.0809876140407989	0.281516620945897	0.767947501887854	0.165416874448266	0.205254275438016	0.413557193419372	0.262152760897938	0.0514161469981412	0.0287807212844646	0.000265225962969727	0.00259863175607059	0.453859123006801	0.119780792877908	0.00985624578840751
2008207	11	0.529968398659288	0.222537858763308	0.0156471404663815	0.064352498384833	0.801260091003232	0.051194718648403	0.241146771006495	0.687744998691447	0.139558571927345	0.230777537648941	0.388458874780723	0.187328925037755	0.0548077990978194	0.0242317369184128	0.000299993896428724	0.00188094290430906	0.454224350049226	0.124643856708542	0.0113417319527338
2008207	12	0.43869540290138	0.309356806806573	0.015613235000998	0.0464398382618454	0.756376793726345	0.0280524245883821	0.196906782298578	0.644210403649371	0.115469523610747	0.224501964385781	0.370463621419839	0.15442494053972	0.0674279244544323	0.0210689908899531	0.000309199330585625	0.00145405087935296	0.472756658419771	0.130835374864228	0.0115877013826055
2008207	13	0.36784037958787	0.332908981320617	0.0153437425737303	0.0356579987529308	0.710157189607703	0.0185237583250477	0.165851193293153	0.606345376774087	0.106687989368702	0.180201175214714	0.368266569277675	0.146930504985124	0.0815117050721878	0.0188673515385233	0.000299795356804704	0.00106146769438557	0.483374300105393	0.133426358251805	0.0115779483203028
2008207	14	0.337712680090231	0.275121453008514	0.0147333726182446	0.0319975624249819	0.702563698003474	0.0131112059793244	0.135364000817724	0.586320334680434	0.108236306976254	0.157520280529963	0.433129180269364	0.147703440342012	0.0934530072891448	0.0174378522832101	0.000244091837173742	0.00081428516725236	0.484113067917164	0.132622359361873	0.0109045200619905
2008207	15	0.323249814571683	0.173506933114366	0.014176050753246	0.0393085804050859	0.723411876571903	0.00916194208508493	0.105432765879482	0.601433965291381	0.115017439008995	0.150797639314626	0.531628467893912	0.156994467088099	0.111653699735618	0.0165217600654517	0.000206826051169528	0.000787243754174563	0.455510800389167	0.129463984035889	0.00973695268687599
2008207	16	0.342303662378448	0.0906692246733296	0.013940399382595	0.0471671583800783	0.787047424632724	0.00666170267082237	0.0813706877390194	0.60740416204962	0.12903774273829	0.129281480287664	0.560625127858975	0.160899450942458	0.129513676218111	0.0160094654357564	0.000211331598027495	0.000867865066043498	0.425987776004476	0.121726480678259	0.00809331655205147
2008207	17	0.331930657488623	0.0602986249783663	0.0136525817100981	0.0543629928971271	0.786557821548209	0.00526818517086163	0.057672777233121	0.597644725065286	0.140303364963133	0.104264729218845	0.502123862206687	0.157912121580279	0.151407591282325	0.0165774017307807	0.000226760698337626	0.000929638873879292	0.410394667373016	0.116936041241553	0.00735076386530609
2008207	18	0.331231375001772	0.0523413174342525	0.0123856858264529	0.0642986556634842	0.740586099913062	0.00451351381995052	0.052229118621794	0.595328955532763	0.147857175211144	0.0800939821197129	0.372701328979074	0.151403100292152	0.183897597124112	0.020539171660208	0.000272482751597148	0.000842538550716614	0.402889883218706	0.116908988682571	0.00702579603174432
2008207	19	0.375800698046517	0.0553440736270025	0.0103679656124327	0.0578663410828943	0.747709756067288	0.00406836901859857	0.0542977116537891	0.633189484330602	0.154976009385436	0.0562036663217503	0.305332883927103	0.144017824110125	0.213356660031711	0.026613418532869	0.000332339695407579	0.000746418072830498	0.380757628168471	0.124171071057289	0.00670769345625959
2008207	20	0.420209861831966	0.0627655833899949	0.00866215098292422	0.0470156573092781	0.761584431865173	0.0038512794770914	0.0663125366136806	0.676906370965154	0.164644853479168	0.0516864989846289	0.28418075005306	0.137125473487244	0.248768412009489	0.0313917789731844	0.000382756982892045	0.000763255399675138	0.351271164639328	0.141292638910699	0.00643006841981831
2008207	21	0.472057210573913	0.0597952434984565	0.00741745020461787	0.0314250498775905	0.789764496430514	0.00400455542068418	0.0914359481878115	0.706473117830865	0.183672639357186	0.0552803642517308	0.275750766902172	0.131782464280618	0.274699153668315	0.0372243812013199	0.000573818170566111	0.00115477924300146	0.326135817196466	0.176112161645554	0.00595836923698617
2008207	22	0.505319190384875	0.0498975990373765	0.00657484107001039	0.0250137528147053	0.801781884500535	0.00411750585508319	0.128985168045667	0.732984541828799	0.216989560911232	0.0739474185686512	0.261104612634321	0.128318069572544	0.291724165422965	0.0425993072001338	0.000877293101825911	0.00225391878355044	0.309363959328939	0.247453874000285	0.00530567614349376
2008207	23	0.540143069723548	0.0491322867097879	0.00605952060809552	0.0252368357010765	0.813286325750917	0.00389523214219546	0.166845765882761	0.773204451898943	0.263046345074207	0.106349140793997	0.238524833086048	0.126247869607768	0.297715967095263	0.0469569697513568	0.00140508763131276	0.00305067329548403	0.280900111458411	0.342742538815239	0.00418762266935761
2008208	0	0.565369576441396	0.0366011212808178	0.00573289388083523	0.0310209652757041	0.793714109744293	0.00405145157254222	0.198416530352163	0.789404059145008	0.318157763875347	0.139990131553697	0.218123097030745	0.124807600167977	0.299260362160335	0.0505549628634957	0.00220193806798501	0.00326331630612413	0.252845028885373	0.417283615766017	0.00323120158473103
2008208	1	0.573742567602225	0.0208376918665377	0.00544867451796624	0.0510723498114934	0.758938063740388	0.00450381494642705	0.230107090074403	0.788265249586072	0.361606101093376	0.171994921990195	0.20302594228283	0.124050764894398	0.301368911359908	0.053693490039241	0.00314425293204506	0.00325415843028662	0.228663001782342	0.460520374004853	0.00269358118092865
2008208	2	0.581773590292707	0.0176517866641681	0.0052774814099422	0.062814874246735	0.732267174371377	0.00518883952716185	0.270468117562754	0.776349455146413	0.396045199119014	0.202843407878375	0.192139741275722	0.125714074657499	0.304363417040923	0.0565680764792445	0.00408918565923629	0.00317466438389172	0.218701426838107	0.485145078283794	0.00247065262727447
2008208	3	0.585640100276788	0.0174115505603625	0.0052487528990168	0.0635381005519159	0.722829174442068	0.00602899437246645	0.328505097253863	0.747136965108162	0.401173577480859	0.237274564801241	0.184424784321366	0.131470083656827	0.311992305410495	0.0591863754139003	0.00519279034624568	0.00305872824879095	0.211504835626586	0.484290611103286	0.00242612413199985
2008208	4	0.574575487316298	0.0177493671057193	0.00528427233352887	0.053443442909529	0.721611789635114	0.00679352418117659	0.384133158026103	0.714747929087712	0.376317570582958	0.272425346517804	0.178725741039021	0.141530647649284	0.349410410537106	0.06153523983777	0.00638972239039213	0.00290694099425616	0.202017426925045	0.462352301229944	0.00247828144365467
2008208	5	0.559798401618059	0.0199992586308729	0.00538792323024915	0.0441252756652812	0.695752496397299	0.00719758568209233	0.432598053722221	0.709608449896416	0.320846390364486	0.329751731152632	0.173814118974093	0.153146564028957	0.415393588449675	0.063306157474065	0.00721731429360343	0.00268464305758611	0.197590208188648	0.367397480363142	0.0026655668853254
2008208	6	0.528473515527509	0.0275429924541139	0.00707517491382881	0.0342637967655603	0.627838317690997	0.00702758244532348	0.445913832140227	0.700371400074948	0.259499841376706	0.37511730523122	0.168351814786335	0.168834367187427	0.467219255397836	0.18209061837227	0.00772866966316927	0.00224258055361932	0.199794402593366	0.289537062789277	0.00274785739624062
2008208	7	0.471302630329135	0.0345294326324781	0.0145593528505456	0.0282904760857835	0.580513550017644	0.00631878588413937	0.416003832570292	0.653882355940257	0.21120978869888	0.399089372660022	0.162774266328725	0.198903427550441	0.509289027620374	0.326563639810345	0.0074804968698214	0.00185658683013268	0.175690113896829	0.258992533476935	0.00293216786060124
2008208	8	0.420273358665471	0.0314340975648316	0.0145276354490882	0.0228539202706556	0.514242557926807	0.00572773272981875	0.365452051424029	0.636959257416998	0.189582380183095	0.397418568791322	0.157842661363478	0.274901426750854	0.535303079994961	0.264205502433833	0.00583058457524459	0.00124362984795162	0.155128132410987	0.226892279237419	0.00313908071311225
2008208	9	0.362654665569126	0.0263962485269511	0.0133605895176125	0.0176436732540634	0.420426906005346	0.00539432457252823	0.322907468535193	0.565969111935549	0.177976165732066	0.346636673172666	0.153940738213543	0.261786707448927	0.544702584238169	0.215401241290116	0.0054603508126429	0.000665403466826512	0.136846959920963	0.201542280073156	0.00338680230960576
2008208	10	0.287373632091121	0.0180416982797551	0.0125800421074662	0.0152211189823702	0.375237203047168	0.00458185519979456	0.272794842631261	0.463565940937134	0.166388199396582	0.258100912957408	0.150848941846278	0.215095871569737	0.522849694568058	0.191005478708592	0.00627066242218375	0.000440715185937659	0.123390421636506	0.184190463626668	0.00376256261004213
2008208	11	0.259543878927296	0.0123980167564857	0.0127735597181472	0.0136207492178858	0.343008344188542	0.00480479440045656	0.225145498817105	0.425557326417266	0.157441306774419	0.209347645103467	0.148023552127175	0.19639969580181	0.487975434709979	0.169922172462159	0.00696917311145387	0.000405843872297564	0.122382664809012	0.174268842795305	0.00403208072804171
2008208	12	0.245968695760673	0.0104083020047232	0.0134900158413872	0.0124629295664157	0.360666889087791	0.00501399839100521	0.174263314240551	0.398249884759128	0.149874692236546	0.17720668779328	0.145661525235198	0.19434618737765	0.448493866617354	0.154754501827726	0.00734803089485092	0.000481840679881437	0.125750816964622	0.16871616490021	0.00484162343064106
2008208	13	0.224224604610821	0.00990318436676323	0.0131652719381242	0.0118035688727647	0.38528903420695	0.00515700697398915	0.144851937404857	0.395989833763697	0.143740220091225	0.155455659019148	0.146054443610065	0.197174640405743	0.410730671800454	0.142122064436796	0.00759260047269914	0.000671627308027752	0.12726468380937	0.166100053950024	0.00423924523075747
2008208	14	0.209468244133726	0.00995582569709617	0.0129951382201017	0.0114532017430723	0.391284384070646	0.00512077910547192	0.122653653047161	0.401781199341283	0.138612652308417	0.132802159042663	0.148354805381477	0.221382806015344	0.378553898147285	0.131803108389423	0.00740220465222576	0.000983845588937121	0.134630615207256	0.162860145357849	0.00336981138439043
2008208	15	0.196733095982823	0.0102144290881174	0.0124247820516511	0.0117665910871917	0.403419323713518	0.00481839322060831	0.108688892926295	0.405163859408654	0.133918370863086	0.12299321255726	0.153547079851185	0.266790819341827	0.356981982395202	0.123689406173265	0.00717471326807211	0.00134367655862735	0.147673617158472	0.160493603996801	0.00320165669843564
2008208	16	0.189082433886563	0.0104419023960738	0.0109004102082084	0.014962057244821	0.424666956830017	0.0042573222821827	0.101295440354346	0.419265250556043	0.130633558035836	0.106458666127691	0.159746330140321	0.287195332787576	0.34805005362505	0.118081156888217	0.00718383913386446	0.00183615617566774	0.166767556541885	0.161325954676824	0.00305658944874396
2008208	17	0.202413672806213	0.0108116177840085	0.00750860483101052	0.0232964623427256	0.443245813242365	0.0036881483112019	0.102286294821875	0.423835443215788	0.130866346563483	0.0963141653336849	0.168240357019015	0.294072558860724	0.347091273123305	0.11375470231858	0.00778182569118021	0.00242822694089587	0.190107675013873	0.163509236356403	0.00286810151111477
2008208	18	0.219027369729132	0.0123566686396562	0.00550404911940029	0.0275949088483896	0.446218823187176	0.00340986094884843	0.11170221915188	0.437755420611182	0.133855820416654	0.0930104808423806	0.183276582225854	0.289729330692577	0.362311232119047	0.112682132162387	0.00800095698237864	0.00259547593700853	0.197594045227989	0.164591880845515	0.00276364427874244
2008208	19	0.251389799237919	0.0221468039973643	0.00529066423774528	0.0220012327498281	0.478901540619516	0.00352412415895933	0.119436447542668	0.445050933819105	0.138879423469419	0.09371313138139	0.223891118381618	0.25504583001092	0.368238262294018	0.115801810520717	0.00723710863342844	0.00270171103859631	0.178681235980643	0.162533131284014	0.00273848865022173
2008208	20	0.294444471981072	0.0300781495149417	0.00443602987415092	0.0131972310420355	0.514633467019559	0.00382161289002781	0.120358039569268	0.467062274725683	0.139230346052214	0.104820749217829	0.346514645712461	0.187279935593596	0.363270697533354	0.117452532391958	0.00561119254888549	0.00304112982724632	0.144883101106816	0.157028955998655	0.00281976884147956
2008208	21	0.334255820765053	0.0323819905921121	0.00380287171055402	0.00986060209084481	0.529668704355809	0.00470717884340353	0.120703585406507	0.500255046082205	0.12980740025277	0.114774280102796	0.53200003382315	0.13480921839607	0.356515482624794	0.119623615399342	0.00467327140116646	0.00334921732024455	0.104244321434511	0.145766139900939	0.003364290370325
2008208	22	0.360266855942629	0.0283451591713401	0.00381574783208863	0.0116680711045767	0.522485988040056	0.0064205010356749	0.122797038064557	0.525780511856519	0.112210757807459	0.117609239865542	0.630191427246887	0.104370524486877	0.345935011264641	0.122269392473842	0.00452794978603516	0.00425704269115588	0.0861558750275245	0.12740741447725	0.00427241640254426
2008208	23	0.392658311548054	0.0168685555830967	0.00408690300083861	0.016754498447903	0.505434365996707	0.0064856272581915	0.127652576676561	0.549689259143001	0.101130546947262	0.118581459705217	0.784227400066705	0.088700043809541	0.335681634467628	0.126321699818809	0.00520660326845317	0.00499243416931228	0.0721814400361894	0.111254825959361	0.005916959503681
2008209	0	0.417344842881045	0.00945592325656883	0.00462267340974633	0.0225454200810683	0.479309008498625	0.0065544670447369	0.128178858225371	0.557874682726591	0.100091804822414	0.121990697285954	0.964745961526461	0.0795862900474901	0.327865415211289	0.131987608942956	0.00626671188896579	0.00500480099802754	0.0619230982186968	0.103430529026078	0.00873943890116299
2008209	1	0.430610936148651	0.00864575049791574	0.00582364970726859	0.0306105204918399	0.434600449243192	0.00760466072309023	0.11425590982929	0.556505948962905	0.0975695474123413	0.123880829239479	1.0016722284603	0.0794498298987166	0.320146415050643	0.139582785364845	0.00751008448926347	0.00516476448632799	0.0580978761807921	0.0998214644777602	0.011634985465266
2008209	2	0.439922800616733	0.0115998780088447	0.00749952339191928	0.0408658618448485	0.38085752771996	0.00922358021381607	0.101752064854779	0.564853431203827	0.0856735567174971	0.118994216601778	0.97313002743743	0.0811027954565796	0.308538803860186	0.148739275438281	0.00857868957200201	0.00544856543336266	0.0564865912793628	0.092367992054049	0.0139427248955631
2008209	3	0.442398327072484	0.0155065307294587	0.00931383363694298	0.0475010492481111	0.315166911327091	0.0105237754071457	0.0995819588250113	0.539679364956621	0.0667928163916208	0.109778290469927	0.856858890009441	0.08033534556812	0.293443767537384	0.1584564948167	0.00946056997483568	0.0057157129005417	0.0538901378486024	0.0785309723095915	0.0146970071904254
2008209	4	0.436818405952922	0.0188686859196342	0.0118801845099152	0.0504428580769062	0.258646339588686	0.0111759519914379	0.0979695114352149	0.491483370607681	0.0576940406329155	0.102173801103842	0.828552017518251	0.0771278424426856	0.276589995870682	0.167314486676763	0.00952998284958902	0.00591049109476174	0.0490891369331967	0.0652635954093782	0.0115624236784629
2008209	5	0.436286724915073	0.0225303878615104	0.0141640270332867	0.0521255212209203	0.224991258222289	0.0118945865878833	0.0935786338132291	0.441726295430485	0.0564415537666064	0.0988203964698252	0.792083060780729	0.0752372478733258	0.260176726236863	0.173640659187376	0.00864967637770974	0.00584637921488965	0.0441385029993353	0.05758774033087	0.00902797822430623
2008209	6	0.425925068646312	0.026756204508478	0.016189344287095	0.0488387215202305	0.205995001757593	0.012906326718393	0.0801178267830742	0.390038191962519	0.0576735760809385	0.0972894361918441	0.622057783166658	0.0727127407879997	0.227633978614754	0.25320753771315	0.00766021082735304	0.00609549351442444	0.04321212773276	0.0550050315567721	0.00665771205640253
2008209	7	0.396206851996181	0.0301910153776749	0.0199774475282476	0.0452122870963811	0.174089368771224	0.0132508947008055	0.0808510890752542	0.341557467646252	0.0600402119004482	0.102853164605158	0.521683901505328	0.0652617856505734	0.17926100029326	0.313555862406087	0.00736957870106863	0.00523530843793928	0.0487507702272627	0.0545528696692874	0.00730524442502654
2008209	8	0.319686653689675	0.0309326026859178	0.0262949578216362	0.0412014479983521	0.137962739799858	0.0126329126547729	0.092441879511228	0.264003005790428	0.0585129239218066	0.122462038078098	0.383941695343297	0.0591282055137306	0.164372763730866	0.311239464181198	0.0102216299544391	0.00671397681252345	0.0539563973870976	0.0550052571565162	0.00680630147063893
2008209	9	0.253205529956024	0.0273615082222635	0.0395144475300501	0.0371743562694453	0.112190085952968	0.0117622784540178	0.10625207842548	0.189503766897896	0.053668363558213	0.119064843824759	0.288802487226975	0.058765634924496	0.148637395731286	0.265015934266198	0.0130903745310173	0.00760120966230839	0.0658194299959531	0.0563202413033166	0.00332739235761912
2008209	10	0.191298551538777	0.023968360726007	0.0544318413736965	0.0382886094546105	0.0884877141256422	0.0118314631217746	0.0945988171421056	0.148793911383367	0.0464849773605914	0.100473728393595	0.259666251529726	0.0694251947116741	0.135585157841804	0.224488749610223	0.0153988113473466	0.00674484553913239	0.0752447629756539	0.0549885168788531	0.0017306496455419
2008209	11	0.13910767423623	0.0229448715251081	0.0695585429292302	0.0376534611831118	0.0818511766959477	0.0122405810904196	0.0756221799504922	0.12346928409734	0.0449124589815238	0.0869293492707527	0.258373681145891	0.0808136170465896	0.125494774447611	0.177535732804134	0.0160596797797867	0.00501621036734951	0.0831644853778037	0.0533773665346135	0.00134339302450628
2008209	12	0.107541341590857	0.0223534482402765	0.0819119461204475	0.0357699942773582	0.0881551710520787	0.0124781570008462	0.0668373966490505	0.104711733368454	0.0486971399680825	0.0739117350719627	0.252889821804313	0.0787030132428207	0.114889387748296	0.145801261545568	0.016379996948934	0.00399122141023778	0.0848084892803654	0.0526879060303766	0.00123484794149305
2008209	13	0.0860626171600537	0.0220006527539897	0.0535504090308326	0.0316925015357832	0.102466927562816	0.0127668762911679	0.060975591116711	0.106879440480185	0.0555090380667971	0.0682949944006574	0.232751199762614	0.0589438213634122	0.0999640311783937	0.115031920328082	0.0162276158994837	0.00339083332069159	0.0949236163781386	0.0533046190220617	0.000975091273835595
2008209	14	0.0717450952443737	0.0215399281368572	0.0434089178837322	0.0244039578473948	0.125843333069253	0.0129786489744144	0.0613188690834174	0.122116119366222	0.0598758914519723	0.0637927741722619	0.208102727170506	0.0505786960418151	0.0838746249102824	0.0937543264504914	0.0171743934360675	0.00310785160986794	0.106729593173043	0.055174896439816	0.000700512423032924
2008209	15	0.060368998222268	0.0219048029609766	0.0129027175145377	0.0155717868658202	0.161096173947979	0.0130357336929152	0.06840837370549	0.150660782726697	0.0621912689162558	0.0592670703524891	0.188529359796387	0.0475800351126142	0.07184557052005	0.0775579663504895	0.0188149489160378	0.0030975338869747	0.124189517421622	0.0580203844400802	0.000499215647230016
2008209	16	0.0544883839900756	0.0238966555507262	0.00845198757469862	0.00969657499768969	0.193160865938684	0.0125548076396883	0.0733990993188433	0.196397015942869	0.0639988136391718	0.0568139236457212	0.185600995923996	0.0333734952156145	0.0675204138304903	0.0671919252240359	0.019614190774693	0.00333876189081378	0.158127298566578	0.0604581930035337	0.000368813432925899
2008209	17	0.0570499542302808	0.0273233604220669	0.00412892634759037	0.00737901962095295	0.226041160517705	0.0124416283451894	0.0778467769006288	0.239039033788387	0.0662688255466161	0.0619607736312353	0.190492549059286	0.0185765859808189	0.0670203767775192	0.0616604110783627	0.0209089940153951	0.0037957310727756	0.210726661575607	0.0622433610734736	0.00028222618484009
2008209	18	0.078871763746352	0.0292410059855732	0.00507633473490166	0.00610478250825435	0.246431599226295	0.0134833078122027	0.0837731630877048	0.273879391849294	0.0695811673160183	0.0738285690799613	0.191535988127634	0.0128583866742735	0.0665093348318409	0.058715019650608	0.0294064293135916	0.00414762270991368	0.243086977792233	0.0631233128916969	0.000242444764451778
2008209	19	0.119445785382193	0.0285836389589447	0.00814481827001193	0.00794879863777945	0.274665998891877	0.014093356380171	0.0899772633372463	0.296660773748845	0.0743781080085902	0.0787499984526643	0.184386691590867	0.0112484160962966	0.0655534639042406	0.0569738697488108	0.0466824909330738	0.00397238307398039	0.271291441263785	0.0639789399724365	0.000248563240467676
2008209	20	0.165462473003295	0.0237625766435688	0.00895675112832132	0.0120869784739298	0.312556868417173	0.00964653834074978	0.0986934803572491	0.310897950669531	0.0823395713304338	0.0863149765169072	0.156400077281721	0.0103550404976093	0.0636140665825565	0.054387670648814	0.0658127663851743	0.00366249710682792	0.294154369116923	0.0638340052776992	0.000282359859264781
2008209	21	0.191383383675778	0.0162415431906726	0.0115110656558449	0.0147988997239781	0.295535562423638	0.00470037065145922	0.111374511577672	0.335927981106766	0.0966827577027992	0.0946642089200385	0.123122952459844	0.00932847763692593	0.0620158472027495	0.0508203950867573	0.0794183894678652	0.003142308904552	0.300623139452642	0.0628232797380311	0.000344631178905242
2008209	22	0.175617505877155	0.00964881863402262	0.0134073852445291	0.0225236660751908	0.231938524625737	0.00353009908198414	0.131119208409541	0.346166872847298	0.113561238154702	0.105661826288935	0.0998284843431845	0.0110599221529692	0.0611612651005069	0.0472663512552388	0.0869790154936416	0.0028378782123111	0.279502188872451	0.0614321690391509	0.000455866858120284
2008209	23	0.181877838547068	0.00417858547393596	0.0146428322947371	0.0379911844410179	0.159370663612182	0.00293857434833349	0.15714726174559	0.290573148142114	0.13571693807275	0.136377788854587	0.0788628721517312	0.0232094029466498	0.060619677195329	0.0437457680148014	0.0920717522302471	0.00267222682184926	0.248602506769568	0.0600583151754922	0.000683222819709676
2008210	0	0.189243059002609	0.00313196016119674	0.0154705717582023	0.0559152622960827	0.120421877465054	0.00275654264890737	0.175440890949211	0.201313158627088	0.152292218449846	0.183794426271929	0.0526657346731223	0.0313498156736837	0.0603385864249202	0.0404604506620341	0.0972554531799001	0.00260745472081423	0.226949817370766	0.0589085102064455	0.0010348090194896
2008210	1	0.166248327265261	0.00302405614284775	0.0157620550110691	0.0732697449478342	0.132471859808544	0.00297758763199369	0.186325361750141	0.131827664043287	0.158087319696082	0.226449053965301	0.0251227531696036	0.0328364075836232	0.0603476407570947	0.0377993846317902	0.103732065702032	0.00264261196690852	0.208173397656214	0.0586271246764583	0.00147496770192159
2008210	2	0.120910519911836	0.00415461844503334	0.0152230244667671	0.0919924354616095	0.169501211900284	0.00466872074657352	0.199278330565939	0.104122122289533	0.159180429803424	0.260255136519296	0.0122030536717233	0.0319890337690405	0.0603429763601612	0.0355877549982223	0.111958678424279	0.00275058795453144	0.194070440923343	0.0630380776459712	0.00207771644777251
2008210	3	0.0766170214043553	0.00588719252267782	0.0135007787990015	0.11429686785387	0.203834093235047	0.00748972732651839	0.216085107299087	0.0989582555216379	0.159826426431859	0.275467243459938	0.0098258314649042	0.0309288844002159	0.0603778161517538	0.033643505645911	0.121775521102271	0.00305220994183546	0.187718698456961	0.0658918276781701	0.00297109923262744
2008210	4	0.0548539149858848	0.00957684669820475	0.0111277472555702	0.142325795405924	0.235100991540572	0.00978415887902841	0.232067160389028	0.107667466117632	0.159471288646583	0.28135018089327	0.00882841363996595	0.0311987001754328	0.060240755306949	0.0317718558962719	0.131075861590598	0.00369969747111319	0.183244869419266	0.0748605183512066	0.00421560997506157
2008210	5	0.0435263801774646	0.0189884010528225	0.0108953795538584	0.167753225135606	0.245098371597851	0.0107282036140258	0.23746736929304	0.130701329854152	0.156847906421571	0.283728866945396	0.00823762434562332	0.0321371994671917	0.059599266025599	0.0298846360705647	0.135596889845408	0.00585408868322424	0.176885242722681	0.0812534969236121	0.0040030585206472
2008210	6	0.0391617345716401	0.0294441128235229	0.0094589267749445	0.173112328169155	0.235988261253957	0.0105000662762989	0.242523319460333	0.16728566401038	0.157074948521477	0.278465845083847	0.00797900042837946	0.0326753071955553	0.0609400681434217	0.0272743444329065	0.136888402639491	0.00810998296386924	0.163615616426537	0.0995109062249956	0.00226106277971595
2008210	7	0.0380310184541544	0.0338892189466314	0.00590901787734746	0.160332732902611	0.223950525524813	0.00951694265628049	0.246301521468525	0.196949100057644	0.169604672016785	0.264795034578154	0.00802962364653449	0.0393683931515967	0.0589511093172606	0.0468206854422207	0.140626702729727	0.00982527800508459	0.135820794194342	0.105514017435364	0.00213849821248666
2008210	8	0.0383073981977707	0.031792525508264	0.00980827498009034	0.133147352930239	0.21409918791647	0.00907435584985468	0.241176146697459	0.211307914068293	0.184882249662137	0.232387064146565	0.00837054454941152	0.0479911961003252	0.0556335599568116	0.0470194008638864	0.144333733447642	0.0125028991371597	0.0994268639709836	0.108614940901828	0.00244868655636462
2008210	9	0.0406691015098373	0.0253177683831156	0.0174171999925742	0.113280541233993	0.208503730155543	0.0096402966830236	0.218525100695282	0.207173225702633	0.201995204219597	0.180059435282635	0.00868527898076013	0.05328901275387	0.0542760159743477	0.0456019131814411	0.141666607718141	0.0185934196649407	0.0695894002206909	0.117036454697411	0.00341364536434619
2008210	10	0.0426520195419384	0.0208240597602273	0.0228876536063866	0.114948878172453	0.205014201205142	0.010551582701878	0.216646763412231	0.202456367141575	0.229027522436813	0.159945754150851	0.0095101529250302	0.0545960503686945	0.0624116881845463	0.0490464114830915	0.128941389428072	0.0263467328030083	0.0622094262353442	0.14852599113382	0.00432075000275002
2008210	11	0.0495990737572756	0.0192665280419258	0.027449124737174	0.118775294655268	0.200565519420445	0.0109803489389011	0.224675419231338	0.205663527425977	0.255421390602937	0.157676723849843	0.0103284738753305	0.0507607523961263	0.0698669233799029	0.0546112772804411	0.113060924976715	0.026304277034064	0.0618886892178446	0.172137268716031	0.00385258598710727
2008210	12	0.0557729179888085	0.0190073661625283	0.0299828086139312	0.124016611272755	0.19986875112137	0.014003879536813	0.235532055412472	0.214513376383816	0.259429915726107	0.162113529551218	0.0108605779318094	0.0315922513030385	0.0755226452147107	0.0565658268152019	0.093040001225082	0.0253773707751626	0.0642208018848999	0.175744630749164	0.00332059515884602
2008210	13	0.069241138503217	0.0211395820210129	0.0321309881264621	0.121750568738692	0.204974143050559	0.0185715378875391	0.245697206482074	0.231073161476501	0.250775096750781	0.170145684460407	0.010791153645266	0.0144590304500895	0.0759706645264198	0.0563653571425246	0.0731958648039514	0.0279787004030754	0.0674198222425774	0.168254529382291	0.00280885194254274
2008210	14	0.0875347027509143	0.0254165663441162	0.0338845496831133	0.112645214747418	0.207230588770035	0.0226825464946613	0.247663232720288	0.250938813532077	0.240907680605545	0.183006378051347	0.00918046430011721	0.0101789207997238	0.0756572306496127	0.0557442142148487	0.0553372411532043	0.0336927984710663	0.0736375238760852	0.157696854587408	0.00251426406000192
2008210	15	0.112430910632125	0.0298486601876548	0.0349728354000442	0.100800934404871	0.191784858100463	0.0267423420314008	0.244121547402637	0.270734419096463	0.234413364606866	0.203131113791303	0.00716311379711334	0.0095774517423726	0.0776649384089096	0.0555018272953127	0.0446652475665535	0.0403915077530249	0.0810168096762888	0.150268088670708	0.00231849811565692
2008210	16	0.144715964599062	0.0337762037286996	0.035883063732229	0.0819724608175397	0.155900158483942	0.0322600559543466	0.23233763212899	0.289904496756277	0.229157257972929	0.21891810582472	0.00654751208965393	0.00976537113965042	0.0836377453239628	0.0543356514148388	0.0407871129337226	0.0480662492880917	0.0951590550791937	0.167265141858292	0.00216485756203529
2008210	17	0.183399184788248	0.0381536751984302	0.0357007776180872	0.0673198817106768	0.137234973142242	0.0416467134940428	0.211724910497362	0.319386057323729	0.224468152757355	0.223975863690828	0.00628460263518855	0.0105547657083982	0.0881617227806052	0.0523586418991844	0.0375672679417962	0.0558324139869402	0.112694983694335	0.172848325407023	0.00193232961577541
2008210	18	0.228924285988518	0.0461248720733758	0.0342195555212501	0.0576901764131618	0.148712331933013	0.0545241231788215	0.180612362127194	0.324082239688617	0.222693970344588	0.217579573927633	0.00614666890519536	0.0113419470787192	0.0873856121192639	0.0506834875778482	0.0320059031264854	0.061937630376432	0.100913523694655	0.183058152048859	0.0016907052325999
2008210	19	0.287045245951409	0.0592160923495389	0.0318595847434704	0.0450465924125249	0.152808701172577	0.0655693542284648	0.159611050849951	0.311999302761426	0.215845770073757	0.2007286888708	0.00632581429395439	0.00925147167343749	0.0834370006643749	0.0480170122846672	0.0269982794521225	0.0620112804245841	0.0505261267859522	0.176990051647956	0.00158167350787177
2008210	20	0.35235813450227	0.075855726374013	0.028052764725276	0.031848531150562	0.149417738544277	0.0709794608594203	0.139774474593747	0.329695077493774	0.205923757229976	0.163270961118461	0.00670224958166143	0.00764291083908556	0.0768309420085327	0.0459210930551472	0.0255817913353211	0.0566324973455734	0.0280536720678554	0.148409682665638	0.00170710722380232
2008210	21	0.373489292227939	0.0782996885565987	0.0246276537412517	0.0239360162796028	0.138871263475754	0.0704686064707245	0.111008443243661	0.333133027621858	0.172305850009188	0.140716399284525	0.00689324490904143	0.0126440154529309	0.0687780320375382	0.0461068917403681	0.025273895530978	0.0498348267838874	0.0258565764893789	0.119023748830791	0.00216013072713585
2008210	22	0.330964260839105	0.0716104657327692	0.0219245060840446	0.0215818485869309	0.130460316077629	0.0686828442660337	0.0945928990185253	0.310644991129642	0.111106007011092	0.13167197022917	0.00683199606535915	0.02089693835963	0.0622040518390889	0.0506784334603554	0.0274702610797056	0.0453894930964478	0.025064846735313	0.102128308223507	0.00311741876673145
2008210	23	0.259913135989038	0.054241817042839	0.0201953571296004	0.0209670071903518	0.127412127667808	0.0622521639725048	0.0997741141734096	0.284714406913201	0.0967656517379203	0.128671246517764	0.00667541508500033	0.0237587563581289	0.0583661952708549	0.052305738545394	0.0314975531497276	0.0438062761828835	0.0146135971359748	0.111044794404908	0.00427399625275768
2008211	0	0.20374104719679	0.0389224428925619	0.0194201532480187	0.0214166740355301	0.118698377854483	0.0483084500829135	0.12586345334399	0.260054765767489	0.100203796488353	0.174831681642261	0.00623716875253011	0.0269640123252267	0.0555732260640522	0.049640314704829	0.0350211919492307	0.0417875765530477	0.00900950675337983	0.138596535266901	0.00479561977314861
2008211	1	0.16235139252207	0.0285888602318963	0.0192510495683804	0.0224562280828383	0.0812588025585834	0.0329287055677102	0.137162542762695	0.247833720369967	0.106110052311428	0.242091675777035	0.0051579021849617	0.0377972355040514	0.0556512247957185	0.0441727053271354	0.037916948407257	0.0383585491747848	0.00735331895240676	0.119358213939065	0.00460343224917092
2008211	2	0.130843015695623	0.0229142021907302	0.0191926290515449	0.0248874399625124	0.0377336811585574	0.0233854503313952	0.142490155598016	0.24565959171733	0.100796364479488	0.259197906842829	0.00443338631476728	0.0443990362446542	0.0570098175222398	0.038803511705305	0.0403291589767521	0.033788448283115	0.00702279817253622	0.100776416555786	0.00413760660074692
2008211	3	0.109930073420312	0.0209941603490646	0.0188136866110865	0.0320238288785129	0.0270465645337404	0.0200309647367081	0.157274937914681	0.225182220491005	0.0762278512951844	0.245076221075362	0.00442191007449032	0.0436290349138952	0.0579245494677766	0.0349908243771424	0.0419107683819875	0.02903897152438	0.00879900713310408	0.100614700001369	0.00370724316845595
2008211	4	0.106189014091796	0.0198084995422108	0.0178937017944803	0.0432489997163041	0.0282720585098062	0.0181076250075703	0.166367243720739	0.183392592263001	0.0528615486076985	0.227700310660085	0.00473108156236483	0.0420852181550043	0.0569635747121671	0.0323536459315103	0.0431767198263444	0.024901943314481	0.013583785532859	0.0910580587652148	0.00345919679542749
2008211	5	0.120377673773911	0.018676957020638	0.0166519091106421	0.0538631891058734	0.0420196097394843	0.0167738634280214	0.156695491223788	0.144835359435774	0.036330159152289	0.212368472755649	0.00516039587770025	0.0400544965794396	0.0549878984504033	0.0299103767171607	0.0460095851314847	0.0207638205869917	0.0152311160891593	0.0650801768542564	0.00311498409910264
2008211	6	0.138416676037153	0.0180505897068637	0.0151484211627614	0.0577594901545513	0.0562984913058427	0.0167316752662377	0.128720552146603	0.156821828842578	0.02443330773049	0.174589418093869	0.00533055789475201	0.0386606638449403	0.0543029487165024	0.0274421360101215	0.0480068129485544	0.0193192271665465	0.0144065979839254	0.0417405570736877	0.00226370267694981
2008211	7	0.148312464285342	0.0176103083547025	0.0301837600296666	0.0558141087200222	0.0546180654665078	0.0153440670613675	0.10641727504331	0.193331280152095	0.0149396223489812	0.125697425554019	0.00525194984542317	0.0356508543080989	0.0626350287736476	0.0245913781830335	0.0469681777010173	0.0364051334195735	0.012157273590135	0.0296559921645429	0.00135988054261954
2008211	8	0.147949696454906	0.0188874021015969	0.0423772623174217	0.0482922513049173	0.0512718190071378	0.0177594156867345	0.0836385598739234	0.22315890445701	0.0124996294030332	0.0989141923186079	0.00471499131007077	0.0323593194181147	0.0881664301112987	0.0252646298739824	0.0450710581193975	0.0554303207454241	0.0111888260148403	0.0248548280543856	0.000824102760374832
2008211	9	0.143540081065673	0.0207911667506505	0.0749930484203293	0.0412403314613716	0.0479103266414967	0.0223353071171229	0.0736737873652711	0.230570793231045	0.0127278813486722	0.0896666346953835	0.00431475531885652	0.0269624457351754	0.0905256498647578	0.0283775839474741	0.0364402828447142	0.0457826113956144	0.010716714107788	0.0242746407603026	0.00042199099735528
2008211	10	0.144309700435461	0.0240557969726165	0.0779815133664651	0.0356185852660745	0.0524103031519486	0.0269692327794864	0.0691122138950826	0.239450019459988	0.0156035445400097	0.0881853096031417	0.00407113778233183	0.020482446294014	0.0911381809638293	0.0306354193446365	0.0228388538566167	0.0401477020811681	0.00988811402821875	0.0309352874165192	0.00645946598115565
2008211	11	0.149570268074474	0.0246175389010492	0.0738796060649188	0.0317187012323209	0.0640291942271541	0.025126720803257	0.07125093030787	0.228901115759114	0.0197248702460869	0.0893655218213976	0.004236574639599	0.0181468342380716	0.0892581901943117	0.0309725701468063	0.0110413199893599	0.0358009828262527	0.00913132956313656	0.0390080924427445	0.0372537875572423
2008211	12	0.162497306851539	0.0237315789722059	0.0697167987989138	0.0285350143507432	0.0814737784763393	0.0233810629076094	0.0668824030440287	0.220027316256845	0.0206344702603015	0.07629546347365	0.00477565257009922	0.0161693667005515	0.0891920474255076	0.0331631631967703	0.00550103170072722	0.0322166634762299	0.00819669234364776	0.0420797432471362	0.056186306140435
2008211	13	0.185886398660966	0.0243397719536268	0.0667974642112092	0.0241070458204744	0.097461445547359	0.022405659773905	0.0502492163645926	0.206088663803164	0.0210366303130549	0.0633352211828894	0.00535130563281367	0.0143148603988315	0.0888784424200158	0.0374428967102209	0.00460238112827408	0.0289643920218583	0.00842170615029565	0.0412064096678408	0.0555966692892915
2008211	14	0.201880882204585	0.0236584960330767	0.0653809513374778	0.0189480803678656	0.114302806096733	0.0217475203311044	0.0355509589520346	0.204818004220695	0.0219455503833931	0.0475039594193951	0.00554053970972317	0.010452692945583	0.0899805200264234	0.0437257669439033	0.00440020302813052	0.0264587676425155	0.00898427265112997	0.0394245741835516	0.056026133937004
2008211	15	0.208290082404839	0.023161309043631	0.0643515547054909	0.0138190119239481	0.127573027720656	0.0218957562342122	0.0284813915919227	0.213159258629045	0.0222350151294536	0.0367190158218311	0.00572606601896676	0.00768126275885044	0.0909891369198402	0.0413991850139936	0.0045514158179283	0.0238688517978075	0.0108208051976459	0.0363604251923842	0.0526313104471398
2008211	16	0.214263430092728	0.0227579850907718	0.061907498847895	0.0103899182817117	0.137436189438868	0.0228110393387405	0.0261544045237744	0.221160500722571	0.0210996264324336	0.0307138723579252	0.00591406460896351	0.00743712311503998	0.0876994581937913	0.0364171764946299	0.00476030012098171	0.0214741087916098	0.0129863968274926	0.0312446090738645	0.0499449403574648
2008211	17	0.234546406814194	0.0220722750828801	0.0579243295056894	0.00816354170744143	0.150483473446174	0.0230476137842286	0.0233182229370026	0.225710588541829	0.0188004411271761	0.0311469835328292	0.00586406884376089	0.00768320418499545	0.0772325508250728	0.0324530621739985	0.00487571118770727	0.0193070174120349	0.014711468193331	0.0229075205912128	0.0410258270530896
2008211	18	0.259081541814466	0.0211447114704771	0.0519591577766077	0.00717416729012336	0.1704052832692	0.0223383868939678	0.0172672429725257	0.229933846044945	0.0156259836285612	0.0353948524452836	0.00569486280942974	0.00959415957951381	0.0634889693131555	0.0294295399818693	0.00501222189401945	0.017137493906657	0.0154878945066366	0.0142570058103678	0.0386912938079446
2008211	19	0.279244756673495	0.0206641437268037	0.042590043112835	0.0071180573197913	0.188616118044862	0.0207273756488145	0.0125528863230276	0.236957542457712	0.0121918735163673	0.0376109875377397	0.00539019834750594	0.0141050553266906	0.0585751846183756	0.0233999280107533	0.00516540814746255	0.0138729170108297	0.0154539146767115	0.0114110661684521	0.059706530408947
2008211	20	0.294706430397103	0.0205215469806988	0.0351074946236503	0.00634070584547593	0.210161224947044	0.0178426827666964	0.00966791298866696	0.244215231136202	0.0402154904676154	0.0301666557833552	0.00478391535787506	0.0199455912885201	0.0555722153088866	0.0187457265481575	0.00523252330045141	0.011160817521953	0.0162496442554444	0.0110120552768095	0.111679809894574
2008211	21	0.280283142486032	0.0152909488301481	0.0292311036708027	0.0050894862851004	0.229486505356819	0.015674856270681	0.00732352121877696	0.252796962661081	0.0904596854435321	0.0211928037565134	0.00407715990300037	0.0244263328534583	0.055491022130958	0.0154936999051445	0.00533368344975357	0.00991737395753578	0.0172527259611586	0.0112036095039247	0.164098925250934
2008211	22	0.271244643003886	0.00841433369138177	0.0248802935821474	0.00456603307309725	0.225385523111637	0.0142658532197035	0.0108226362652118	0.264085800745132	0.125527409043819	0.0222988237541242	0.00357110827006172	0.0265851752397601	0.0524882716648581	0.0139647078483363	0.00549731238849817	0.0095248765449664	0.0173583223988797	0.013483066709723	0.188979846167732
2008211	23	0.250980692892999	0.00606081858009567	0.0218822231877232	0.00455492271809691	0.21477320312529	0.0131790366485577	0.0171950661754405	0.274697047660855	0.0853360402748541	0.0326347334425037	0.00317823602458815	0.0272367218812405	0.0496884786467261	0.0139166583017056	0.0056532469330498	0.00960250155539528	0.0168530887040248	0.0285487440763969	0.187105038109649
2008212	0	0.237290893639199	0.00619574096237523	0.0194497371760141	0.00455688366218289	0.193144628230454	0.0123740635445969	0.0227552251660886	0.27872517841401	0.0415448918627179	0.0432092996810883	0.00296069986274097	0.0268747304520219	0.0427488642680404	0.0154831074484432	0.00570233368765692	0.00970568079643255	0.0157323434365377	0.0573178544387358	0.177321617014766
2008212	1	0.225011824076281	0.00728598587902658	0.017601547926709	0.00428941889590627	0.158957292109086	0.0121582621379934	0.0288648914441123	0.274035957105588	0.0168833229985446	0.0494675495184123	0.00295935000021599	0.0254831963843659	0.0299031237417279	0.0198304213751449	0.00559584869669736	0.00978152567390102	0.0143244927630229	0.046642944515126	0.166175586133601
2008212	2	0.210291607921916	0.00849503401887433	0.022112794240387	0.00359029145764102	0.122680089985979	0.0120486508734139	0.0337003347964914	0.257480860023152	0.00941050798672566	0.0563283716774736	0.00325773129088671	0.0225289431956345	0.0201547653629701	0.0286753906320941	0.00536043699084057	0.0097678707298991	0.0128751065882344	0.0174877194857987	0.15674664481544
2008212	3	0.186839889989184	0.00926329599422896	0.0194633959825657	0.00259412875369529	0.0942108522410545	0.0118943268288372	0.0381850714217299	0.230447180983621	0.00951168845084597	0.0655593970350174	0.00395099287644839	0.0169592417859188	0.0162315505569698	0.033769495739254	0.00507389962123895	0.00961568496389034	0.0112520203287401	0.00557745727144914	0.152907223054431
2008212	4	0.162676319733934	0.00978266255711759	0.017070919167125	0.00188277981136695	0.0738523394581553	0.0114862729666769	0.0420256553820196	0.197314085028585	0.0110650997052568	0.0723244315596145	0.0051695464990706	0.0146283786268582	0.016262810082288	0.0334536133482833	0.00478152496893946	0.00937263412624195	0.00931121121096848	0.00391239312895565	0.156308057583298
2008212	5	0.138067146829782	0.0100320217231708	0.0157009538340215	0.00158414170997335	0.061048039675522	0.0109340633475534	0.0470585953583948	0.162518452366693	0.014596205788059	0.0775484345463392	0.00679276372164976	0.0140357134481952	0.019236487000427	0.0313837606055721	0.00452529176060303	0.00897662984474762	0.00756769578515674	0.00353583472701946	0.16354614203345
2008212	6	0.1172256242484	0.00978836255918197	0.0158558083968412	0.00150320154952289	0.0558443940171686	0.0102753444036668	0.0523904866352933	0.132893233704377	0.0203473279176497	0.0697540753182597	0.00817295287988968	0.0111850347444905	0.0199881857024729	0.0280996648938105	0.00479717834497602	0.0107985921245324	0.00664605076236271	0.00360768812995002	0.169259538472753
2008212	7	0.0885618647219174	0.00877935995058729	0.0180070122996691	0.00207074689807624	0.04875542092161	0.0101795469409008	0.0515990588358433	0.116289684161405	0.0202487593101009	0.0605865612094901	0.0088329662053923	0.00757069091092644	0.0193237096242238	0.0243664621036125	0.00539574530362442	0.0131518332018569	0.00788490535026121	0.00384772705726237	0.289763398497939
2008212	8	0.0672546045814747	0.00901837071598703	0.0291900608465889	0.00429253518421266	0.040638903029118	0.0106346713699162	0.045680802478378	0.108274467157479	0.00994755016896719	0.0489742555585986	0.00881106846982025	0.00419147974098971	0.0187425298442031	0.0263136368903146	0.00528661580370515	0.0209031973308288	0.0103696857200371	0.00442130915029578	0.325990123040154
2008212	9	0.0503673741398871	0.00919018800033172	0.0366827423358732	0.00819286808718097	0.0324377405940318	0.0146359010671756	0.0326558038356077	0.105358945681698	0.00353146440940644	0.0344329507163095	0.0083794644605497	0.0026832534657244	0.0202050996141763	0.0276749541044005	0.00485371410068567	0.020539091214919	0.00887501834614298	0.00607007800277809	0.272473197756826
2008212	10	0.0400393122455319	0.0096696852647002	0.0370875930830978	0.0119554374163338	0.0289141524253423	0.0170998921800269	0.0209824488485248	0.100122588920384	0.00239911363213105	0.0246546369361866	0.00759367426128531	0.00197513880687002	0.0248721969290765	0.0297546150499339	0.00455572447591049	0.0220787383735227	0.00694795737501316	0.00692994681492172	0.19646089078052
2008212	11	0.0370177055699452	0.0111378583202591	0.0362635811672076	0.0142446638335194	0.0288619220551178	0.0188155663849621	0.0122958717968289	0.0998567076250049	0.00201050144482255	0.017945115392851	0.00685545268103275	0.00156743872165232	0.033238613234029	0.0307968422124256	0.00428770294987265	0.0213569999796425	0.00583630789673926	0.00743048426616086	0.192344090345375
2008212	12	0.0430664655556811	0.0131360670387213	0.0344260894305959	0.0150625617164957	0.0302014553319551	0.0194301467873566	0.00732917837874793	0.104041172603343	0.00210135825027653	0.0129128402239826	0.00630231475630023	0.00134068726184563	0.0399420332357906	0.031091310210873	0.00376726884303156	0.020196284724703	0.00489727937775015	0.00946312014018949	0.188139980526897
2008212	13	0.0449426311597293	0.0144422388785655	0.0321841238524747	0.0181959393189173	0.0308871496309425	0.0189537824239232	0.00518094219369182	0.108955557834013	0.00241120350295502	0.00939644157191221	0.00585946682114516	0.00125727851235179	0.0402575708947092	0.0307724493791917	0.00353588987169221	0.0192096738073872	0.00364439989076054	0.0123700762524225	0.182330951797855
2008212	14	0.0432847107611959	0.0151214089911701	0.0287444367164312	0.0193234749055327	0.0316849253630935	0.0185449503736616	0.00468165991525922	0.114967816704053	0.00264010317245409	0.00775169081429696	0.00540800866816646	0.00125086958560347	0.0391527608306753	0.0300261836659871	0.0033895502229676	0.0184425696520448	0.00242832410337498	0.0144529680118522	0.181371751809706
2008212	15	0.0424731344603343	0.0163946080913134	0.0251607066727695	0.0185692182416324	0.0337883915255831	0.0179306008826321	0.00517898599020163	0.126432602009068	0.00281555387405797	0.00750671037050307	0.00467723958827588	0.00136397228784459	0.036104537950696	0.0297118978320584	0.0033102263220441	0.017471624500007	0.00173527574212116	0.0155999283452985	0.173710410176791
2008212	16	0.0422205879632111	0.0160111077738497	0.0215996436986763	0.0173944133047534	0.0400520750937554	0.017366819962854	0.00533060715761033	0.132302250671071	0.00299669981593241	0.00784464948008891	0.00336896368247744	0.00155688902521282	0.0332250154450956	0.030473433686097	0.00328026502295731	0.0159808242049033	0.00152824838628354	0.0170028519469206	0.162393132009807
2008212	17	0.0430317932376135	0.0147529602438477	0.018298087804754	0.0160362280114609	0.0387580656540791	0.0170102525622694	0.00486848072723193	0.133093917357794	0.00325759183114057	0.00823269031738193	0.00230104289444805	0.00175623029325504	0.0305641106976286	0.0306667756309292	0.00326684899673749	0.0132708198000397	0.00175991971713692	0.0186056104044407	0.154527644058506
2008212	18	0.0472860506303406	0.0134084556149651	0.0154826856738575	0.0136407730992459	0.0349831744741041	0.0165160054796984	0.0040296486508451	0.142131753542444	0.00369042188668175	0.00795038636039966	0.00219110404391394	0.00197772944697239	0.0269471515900436	0.0299117579981096	0.00321651042730003	0.010122777607116	0.00244405223523948	0.0202332189254521	0.156060337770205
2008212	19	0.0635620761917928	0.0126818430118017	0.0124997382927229	0.0096503945414074	0.0370623519248948	0.015769013475484	0.00331607812048877	0.156113802682725	0.00431696045998275	0.00699001660569407	0.00218766959820349	0.00224962430633348	0.0230720164344373	0.02815019294061	0.00300536691679608	0.00833047069368394	0.00309200630251555	0.0218530766052123	0.178013640231441
2008212	20	0.101300303055818	0.0129291857592498	0.00928414505774094	0.00594178781030163	0.036150133910065	0.015203338329891	0.00292279751404903	0.157142503439624	0.0046134368510642	0.00537627338590038	0.00213478917982239	0.00250864394358373	0.0207530404238696	0.0245537535406231	0.00280613315463264	0.00670418989726542	0.00327902053577238	0.0222892924465788	0.208973043481963
2008212	21	0.1439845114748	0.014435191774166	0.00691372765941982	0.0042250611577005	0.0313222351733346	0.0149625055220516	0.00285756119942449	0.163719493607746	0.00388870632292603	0.00460673047725326	0.00189501337411484	0.00267117796376707	0.0189113863545882	0.019765690862948	0.00266178989514641	0.00588011912377581	0.00326372698285416	0.0170635590911681	0.221748957203489
2008212	22	0.164646501494401	0.0173142175846771	0.0061539026704062	0.00360464597342883	0.0232392194685885	0.0151150997504364	0.00296575407736093	0.16967948406464	0.00297310293559707	0.00587597974082623	0.00160943316160046	0.00276499858648412	0.0169430513360045	0.014978353215761	0.00259838564865292	0.00553714441170066	0.00317098116625712	0.00649283994260174	0.214363003317844
2008212	23	0.17717455956652	0.0173377363281776	0.00549558515041129	0.00253566844852153	0.014631970390943	0.015115839002464	0.00322366628183333	0.167424604195301	0.00329847713510145	0.0109586361353007	0.0014092710146094	0.00282216620371604	0.0148981732258909	0.0123397053282307	0.00280040441080028	0.00553863407687631	0.00302914561493653	0.00226426686559006	0.183437471839576
2008213	0	0.177656873126417	0.0171654461850346	0.00482336868598321	0.0013732929282322	0.0118097579941046	0.0146919727595179	0.00363273540691665	0.134718954713526	0.00379590702754312	0.0148216117112832	0.00125892506044078	0.0029071707673	0.0131866325891553	0.0114145227946833	0.00291724351621068	0.00603382429035639	0.00286661159796498	0.00166693253685556	0.148300092582315
2008213	1	0.164171151518955	0.0170887442624515	0.00441533770340847	0.00128337632392623	0.0105275278937092	0.0141130529376435	0.00391118479981997	0.11034780429881	0.00371833721964744	0.0149526381646477	0.00114815705943006	0.00295387022722267	0.0121255149815967	0.011282109343893	0.00281669022952885	0.00687759496035956	0.00269957796464432	0.00177717590755636	0.12211677762485
2008213	2	0.153532590709221	0.0159683417394383	0.00437735207741631	0.00136853277323337	0.00986534256170965	0.0134205322551223	0.00481539305508272	0.0963074801257793	0.00315678542348733	0.0128051180084909	0.00105342503345866	0.00295158887698762	0.0118326599812982	0.0119363667710536	0.00257349900803672	0.00798888668312542	0.00257064595136266	0.00228994411663661	0.103394810821612
2008213	3	0.14324540919548	0.0129170767404594	0.00418611443955604	0.00137218990031874	0.00826527819045742	0.0121460921018992	0.00645499209655395	0.0892927067251219	0.002468743073685	0.0143292575425552	0.000984421009493597	0.00288235364327434	0.0122608447034978	0.0127998277900867	0.0021175315783902	0.00917671869543906	0.00242802047622905	0.0025866153331378	0.0863801639001361
2008213	4	0.118306807807246	0.00862494704879218	0.003835289801375	0.00126621421739889	0.00741455696955794	0.00975088374057469	0.00677564341273041	0.088445655476804	0.00199878654375712	0.0205963233065176	0.000953433195967556	0.00281383197114847	0.0131557800747068	0.0140310931677767	0.00161495316821638	0.0099520464392463	0.00230777444016414	0.00242814766486453	0.0674594501177447
2008213	5	0.100911964107855	0.00555738347838767	0.00372866877450712	0.00102794597237	0.00677151745761223	0.00683431880492967	0.0108468762380337	0.0927753897248933	0.00182957162713449	0.0266886080894152	0.000963169846225013	0.00257283850471673	0.0141688069190202	0.0181956378847518	0.00129532500349724	0.0100344381716303	0.00221724726764979	0.00219886594683968	0.0496659232770635
2008213	6	0.0912460536706822	0.00437877336230862	0.00443494568227342	0.000867228433736597	0.00713033800446147	0.00454507282324962	0.0207802681065969	0.101241669693663	0.00199436506388366	0.0377153787249635	0.00101686894782277	0.00205547896963061	0.0148958340566596	0.0235985249288057	0.00128278696013421	0.0113106805253683	0.00222449911860544	0.00185428940409603	0.0411421020634098
2008213	7	0.0848757725324453	0.00435961525531041	0.00569979545077543	0.000865738399969295	0.0105236551988581	0.00562715982006117	0.034064076964826	0.111594539435636	0.00222041373806882	0.0558130130354809	0.00108283159268228	0.00161564638758139	0.0141697958797933	0.0230194083851442	0.0015512986407168	0.0100388589458514	0.00226257466288269	0.00147032733044267	0.0370787948631796
2008213	8	0.0843977161926545	0.00493028536102792	0.00829176189773774	0.00103762293967109	0.0145626640661545	0.00594893300546383	0.0352165953512437	0.118931360062892	0.00218772633029157	0.0753738195252125	0.00110666650111153	0.00172710145351502	0.0250620992179017	0.0272855445500064	0.00376255191871934	0.0118389724333354	0.00227208761015731	0.00123718997820109	0.0361845241661716
2008213	9	0.0718796119297103	0.00595104841852407	0.0190942202464723	0.0013965392393841	0.0160536161080924	0.00859059456733841	0.0280605198185267	0.115173850775736	0.00183959684118572	0.0490199272516539	0.00111355106524742	0.00223804696864053	0.0192225753666231	0.0290128090323337	0.00355116970383897	0.0119463721458783	0.00230307484669507	0.00122860986748101	0.0327351506065501
2008213	10	0.0632797657259995	0.0104572631739137	0.0394375391834634	0.00272515060692473	0.0172030007388794	0.0105567607364969	0.0207900188823337	0.104564139267905	0.00148312608060227	0.029780728549597	0.00113264324289337	0.00354395054446445	0.0191923713778326	0.0292358004432079	0.00279665894786104	0.012194668272281	0.00238335338076037	0.00143032825588907	0.0291123611517243
2008213	11	0.0615758005268994	0.0124602810128554	0.0413395036967748	0.00613225433289296	0.022153647295199	0.0109397305163132	0.0162069198733904	0.112891280348947	0.00145774157133584	0.0227448696585967	0.00120201449516212	0.00499724003627671	0.0183113357221457	0.0287889202062372	0.00220616910374509	0.0118937706302398	0.00241052153994704	0.00189461897404035	0.026844909661226
2008213	12	0.0602277076774465	0.0118308132910273	0.0425963419547552	0.00895753283461648	0.026420855754398	0.0114483852679222	0.0121820368686453	0.117370600848607	0.00160887116935067	0.0192731381175827	0.00131574147400969	0.00508194609766988	0.0161089373346667	0.0273410580696424	0.00183538304425506	0.011384899118576	0.00234863184645097	0.00246942619714242	0.0257932483855055
2008213	13	0.0615756058281804	0.0107458608639403	0.0423613318028302	0.00995685749603425	0.0298991400441607	0.0115266987990934	0.00818156007639643	0.118374635065102	0.0017843705356922	0.0163127321622739	0.00140651219705908	0.00445838680223922	0.0137922459161476	0.026193929340895	0.00161647944156677	0.0110625199019196	0.00220349143567678	0.00285357148889814	0.024693663726973
2008213	14	0.0727267572671158	0.00945855526111644	0.041542611174081	0.00786454615234604	0.0298200719173088	0.0109572261949951	0.00456662761439856	0.128422849006114	0.00189865056272464	0.0140587378056554	0.00144657585826158	0.00360849748545859	0.0118048067683213	0.0258657219574024	0.00146408812923366	0.0105996182818641	0.0020197839583263	0.00294696498154575	0.0236693877324061
2008213	15	0.0884279285381081	0.00865030730979447	0.0402843866917424	0.00596528126530973	0.0296814828138658	0.0104502957591159	0.00297989637293372	0.152344512786602	0.00193804914578868	0.0115493736252892	0.00146548374016056	0.00294314030111588	0.010662318168908	0.0258507633106741	0.00136362056707027	0.0101808336105402	0.00187068101649903	0.00272585539746661	0.0214081866152159
2008213	16	0.1098776520043	0.00794813894385045	0.0387738421033677	0.00454758437851031	0.0295547727393454	0.0100760048132146	0.00299679799635734	0.168655051833556	0.00195709928739522	0.00930454405743325	0.00147362872046272	0.00256999721728072	0.00941111650180389	0.025453488383697	0.00128313257769672	0.00977242354463596	0.00174350384805491	0.0024184841003637	0.0187780080891466
2008213	17	0.138572547566944	0.00678042619365081	0.0365682160231385	0.0031899155829275	0.0338538651398149	0.0096410637734281	0.00411664413899471	0.178233230216372	0.0019832044833976	0.00930902838346635	0.00146686529385932	0.0025863284179508	0.00692698801868043	0.0246618250009135	0.0012148419606552	0.00887402937989588	0.00162203261589141	0.00283181194761748	0.0160137225507384
2008213	18	0.162190033169548	0.00525770957695295	0.0339437455803501	0.00230778611875036	0.0330764084549196	0.00880721122743555	0.00722192030117276	0.1803192098354	0.00203923869287161	0.0114934180650017	0.00149691786788517	0.00292405791726613	0.00386154803897984	0.0231266360434346	0.00114767557764643	0.00719257410754862	0.00151312888847787	0.004712614355538	0.0132446683535607
2008213	19	0.190440732764081	0.00398283066786998	0.0293103376861946	0.00138189164648018	0.0322073132377935	0.00717382304613579	0.0119352515250774	0.189946773322903	0.00218298543068832	0.0167272649700149	0.00162174073558442	0.00317818090263771	0.00265053622453566	0.0206164798189924	0.00101170634527946	0.00554553778836716	0.00147621872783543	0.00748668905051517	0.011076776028124
2008213	20	0.213836557896121	0.00374104639205289	0.0248250076204073	0.000924286986743725	0.0299411563385811	0.00542246392132575	0.01570942807186	0.206908623443513	0.00251120310176515	0.024018368050925	0.0018574115973161	0.00341244004393899	0.00229493035640268	0.0176872057635689	0.000897431602786238	0.00419086686257049	0.00154546804171142	0.00938516613151688	0.0091917786584558
2008213	21	0.237436178296355	0.0046349567525532	0.0209282705731291	0.000801410954812247	0.0299134950877498	0.00463977592081334	0.0170947537447416	0.201648574890204	0.00346840027157298	0.0352929800124825	0.00233457932103782	0.00391071940506695	0.00214590886694437	0.014751333729214	0.000818758430804671	0.00304161569901474	0.00165044530222799	0.0106183088939357	0.00791025407604559
2008213	22	0.230995183422253	0.00474903119720445	0.0176971204714758	0.000848971155069449	0.0262635322781531	0.00443103907371159	0.0162587193458133	0.178227829884858	0.00389105492041785	0.0474962023584974	0.00315791826691225	0.00463111335321742	0.00204951609731474	0.0122074586366558	0.000809139928337361	0.00208435423552309	0.00153426484132141	0.0105497651964711	0.00710676282428603
2008213	23	0.218566064197674	0.00393841882479395	0.0151328622654324	0.000957904864692036	0.0233857758143438	0.00445808717496504	0.0164378064724097	0.154948179159727	0.0032536967366868	0.0501883898186171	0.00400154340810543	0.00469150976458984	0.00195613047732552	0.010030217974592	0.000740144653538506	0.00152762883845299	0.00134798797462926	0.00717053487420872	0.00667944442373137
2008214	0	0.205861936227838	0.00248967310997775	0.0200909298083363	0.00104088945345434	0.016913659923976	0.00425316695040887	0.0187240296503231	0.142716157173971	0.00253983286033758	0.0514198774535839	0.0048390308145071	0.00342132414179335	0.00192364937162341	0.00830197781062866	0.000673782264396851	0.00124877223482077	0.00118047991309809	0.00336963892752647	0.00649559258303602
2008214	1	0.181667792966913	0.00158387063300792	0.0181693523281726	0.00103496900870947	0.00817981485433488	0.00404991058235146	0.023731766243647	0.126801765652606	0.00243344819421419	0.0534250314099983	0.00576423142806881	0.00173610798232336	0.0018956241452064	0.00700040745735916	0.000704718953849788	0.00108762957281555	0.00104856595223418	0.00253802197600667	0.00639969685318541
2008214	2	0.166175239968636	0.00136858215873853	0.0166538212784675	0.000984188709161534	0.00403560719142643	0.00402488399525823	0.0301125404705391	0.108556450466843	0.00259241789628905	0.0548161265068834	0.00693268424118298	0.00129439478267484	0.00193405363362103	0.00606434397506841	0.000882402028657741	0.000975417315350774	0.000976244401932479	0.00217005536329726	0.00626276396407572
2008214	3	0.14909911486296	0.00138508296001479	0.0151038273259289	0.000927701619172745	0.00311387603525568	0.00402962912312928	0.0354408611963038	0.0926109296655214	0.00292728906130532	0.0518996935985652	0.0089756567272483	0.00155268036787939	0.00201657835018993	0.00534301464556776	0.000998717107464268	0.00087238676902413	0.00089708297826519	0.00206185054839354	0.00589189921117672
2008214	4	0.144588464448957	0.00148464703533967	0.0134729076698993	0.000884093419319568	0.00245859767184449	0.00420726810469034	0.0404688548061077	0.0717517864935895	0.00319708091913268	0.0472529287999872	0.0100567271743739	0.00166192623002148	0.002102503013194	0.00471420301252877	0.00104175002272725	0.000796982784435692	0.000800242795044119	0.00219180068745023	0.0053685184054216
2008214	5	0.125762008796795	0.0016606675012827	0.0131390488768848	0.000859372900336569	0.00201296558644231	0.00459582860639993	0.0481611416823439	0.0564830164863389	0.00356103091637584	0.0421566018788835	0.0109300827708852	0.00155683404637308	0.00211924948772289	0.00447184857181703	0.00107428254168351	0.000767167667973267	0.000713818954829932	0.00262832602579779	0.00500616099109993
2008214	6	0.0997471307389513	0.00185460417424745	0.0111909294861945	0.000862491171873271	0.00196263988724269	0.0052638041446019	0.055673003696168	0.0447955181131354	0.00604232157762865	0.0528140556967776	0.0115438803626922	0.00163207318873246	0.00224492306942678	0.00477415254046385	0.00108610513603679	0.00108816058782081	0.000640982114674435	0.00281202264883379	0.00996998721537249
2008214	7	0.0731828155025337	0.00267118444005807	0.0104785914731664	0.000996951861228948	0.00201077788391444	0.00606792448101201	0.0637250230035567	0.0360969185861318	0.0121778581434784	0.0604711259547212	0.0122010432865825	0.00184958620520379	0.00271796247288919	0.00543389437607508	0.00109084294070201	0.00187127148458125	0.00058704791525232	0.00273028381666227	0.0206923429137042
2008214	8	0.055079933895566	0.00348812252951898	0.00941015962921313	0.00159286626057507	0.00200692596466817	0.00607525964012211	0.0755507741816018	0.0330331616000178	0.0124183153127481	0.0573901341161804	0.0125186442931872	0.00242552031663014	0.00705132047494941	0.00723726858938966	0.00110524776520197	0.00429662991688965	0.000628000909015	0.00321189593932335	0.0232385510860583
2008214	9	0.0431689694151211	0.00502996268695559	0.0102536099345705	0.00312918199847639	0.00194056832520603	0.00629454429526018	0.073074751653106	0.0308965602898574	0.00579503795640552	0.0390074203380955	0.0131401827487742	0.00375827922225372	0.00828844774435805	0.00908355196519624	0.00121183300921411	0.0070482176575927	0.000756301409119044	0.00589396269183545	0.0256653573487985
2008214	10	0.0270492416569951	0.00656746030065836	0.0140557035993072	0.00524311466919258	0.00207726207612107	0.00691024206275696	0.0553337760616726	0.026905800809148	0.00268073609779237	0.0296865928708305	0.0132366518752841	0.00469016087479437	0.00830555116188186	0.0107072186509915	0.00123355932781077	0.00742833914890547	0.000835372248943439	0.0085906223320167	0.0423506488248962
2008214	11	0.018638427202198	0.00934816956859654	0.0152775277115837	0.00746982274258051	0.00228636652632433	0.00732986789679555	0.0405319684983367	0.0218630452124668	0.0017013430264256	0.0242737741542437	0.0130412742705436	0.00508755389114651	0.00762497934308863	0.0150963364212783	0.0011803156986477	0.00718038010806548	0.000812412073155798	0.00771013585658129	0.0863599426317753
2008214	12	0.0220491692255355	0.00953733684831289	0.0131077634050521	0.0103089665677029	0.00327552088393689	0.0084199797827352	0.0280796939339049	0.0189388700341692	0.00131694989740323	0.0211898900137275	0.0141019406593251	0.00387333873176069	0.00712022608371991	0.0153031506604568	0.00111022357082234	0.00651963194597191	0.000742092548842056	0.00546690850722471	0.15537372778667
2008214	13	0.0141039291641257	0.00795619300900642	0.011840678254195	0.0123467251638614	0.00521014082739447	0.00855546466967186	0.0213906150056568	0.0184873483347723	0.00102892525850566	0.0201452601179848	0.0172945604332232	0.00104361178989176	0.00718741299794869	0.0177165974463061	0.00103422265768185	0.00671766972444273	0.000666119665864399	0.00297155185837213	0.233126943108024
2008214	14	0.00759882205497068	0.00731051624906051	0.0139584067390754	0.0130186816920922	0.00753477958950028	0.00869466638865625	0.0197484828110219	0.0217640955817978	0.000975516296193727	0.02138736052907	0.0236272438778141	8.30384998485748e-05	0.0075954335592627	0.0189930621576922	0.000969940791592614	0.00688991082077291	0.000611987509109366	0.00130764857462634	0.376949846642691
2008214	15	0.00534981009749017	0.00742486484956311	0.0205846571426159	0.0127730795835559	0.0111001563206151	0.00891525842290689	0.0194173779239986	0.0252464096840018	0.00104058701465847	0.0253543820072362	0.0367515009866314	7.45536102781428e-05	0.00843705202091765	0.0192247121262738	0.000907424302845166	0.00640104467970954	0.000577767167583461	0.000949081404370881	0.503316387319097
2008214	16	0.00436591831241239	0.00975115780229566	0.0363031298172829	0.0121302341126352	0.0176105174820118	0.00890801746141236	0.019797701777376	0.0226255817149932	0.00110395307540916	0.0266338118950632	0.0529026059444938	0.000251562026328861	0.00782774116404509	0.0187746322726571	0.000852330743694724	0.0055566231282174	0.000541093755790097	0.000907827573774846	0.583230643116384
2008214	17	0.00376531229673607	0.0122607455687831	0.0539523834269646	0.0115046893368031	0.0234387044063662	0.00881602434911424	0.0181484129840212	0.0165153023286348	0.00108278779422041	0.026068730284145	0.0599544913399569	0.00219590114723709	0.00622597711285166	0.018446153743583	0.000788986753190031	0.00505119890505128	0.000492791855302191	0.000905997784091562	0.643885918963131
2008214	18	0.0040316430735999	0.014787572851026	0.0651884289131111	0.0108353591517912	0.0187622889930985	0.0084794728425	0.0218634202554861	0.0136309361360317	0.00104020356629977	0.028006146133259	0.0604474561563178	0.00614593189109772	0.00528986184294987	0.0182921928226861	0.000720629518241113	0.00478432838197419	0.000452961889677732	0.000857462423107055	0.706823848763779
2008214	19	0.0105803714220131	0.0188875494238831	0.069794658863401	0.0100890689521229	0.0101735641175682	0.00745597627326038	0.0272846765146954	0.0119675247661403	0.00104176426875112	0.0328393391714406	0.0585397409436328	0.0061725772740988	0.00514588182809421	0.0176613004004545	0.00065080386533265	0.00453089437055416	0.000436046157896916	0.000785074381835046	0.781240822673064
2008214	20	0.0874592984880536	0.0224582609918955	0.0687396918923687	0.00929285297898028	0.00604052713997488	0.00670651699460991	0.0375684564727644	0.0105849356296256	0.00112640455016387	0.0360282943327645	0.054844122462467	0.00563750293466235	0.00590857856295796	0.0167144963006286	0.000606992985470679	0.00423659985310371	0.000433607441504602	0.000724063525437031	0.813523308212381
2008214	21	0.120689968471369	0.0230127759249782	0.0657645606905648	0.00856988639840841	0.00417301738424842	0.00611784322489814	0.057078479864187	0.00864924942759053	0.00136096940095379	0.0383259396200142	0.0509051143446917	0.00543771984026583	0.0078879877298928	0.0157407323382447	0.000593251936819281	0.00395828250733403	0.00042303043249016	0.000703538883092517	0.776214790356528
2008214	22	0.118303614045265	0.0258451272576453	0.0668822353683437	0.00781848673900413	0.00380398941471273	0.00612769868636372	0.0642849626007303	0.0073863179234524	0.0022349581726068	0.0388422348267062	0.0464347517004503	0.00483284405940363	0.00907911279448001	0.014781135755725	0.000583121839875427	0.0037510759382993	0.000432743210018946	0.000695692722378064	0.716995589326122
2008214	23	0.161201938657008	0.0251588283073881	0.0763013690654391	0.00706647761236013	0.00503429186181398	0.00719840959136533	0.0589711933724057	0.00785702970039229	0.00667063462910387	0.0371283976655859	0.04149934529992	0.00260419280116634	0.00905060212598963	0.0139304360349243	0.000578738381405374	0.00359518752521584	0.000460474808111313	0.000713971468984766	0.686622238104063
2008215	0	0.299967058235407	0.0435138681320738	0.0761417337978693	0.00633765309812099	0.00719701248003618	0.0132977593124674	0.0514198676141071	0.0138563101078196	0.0213157929155129	0.0402017838853644	0.0375433850603641	0.00118692308985265	0.0069021152102733	0.0132614596453098	0.000575686511231963	0.00349173742229508	0.000500070933685799	0.000714681834752444	0.683871502800454
2008215	1	0.423665806489345	0.0630762164175829	0.0713469115649196	0.00672542165378207	0.00714244437242149	0.0205753091502631	0.0506637609753029	0.0341876980359672	0.0420168860510781	0.0797456961068597	0.0333014111258941	0.000972165738938093	0.00432232637586011	0.0128138141723456	0.000566703864688463	0.00351200726424681	0.000543105794645026	0.000686398648507383	0.71468551034594
2008215	2	0.448034091182686	0.13371718291037	0.0652641296274786	0.00763664304468399	0.00651770323545236	0.0239547747251191	0.0489008179306015	0.0520222504276198	0.0916809529249643	0.114918778778981	0.0280172718499745	0.000976775369073752	0.00773480444029148	0.0125840232274503	0.000539238857186753	0.0035520420751531	0.000594304295824779	0.000861059360818633	0.743980950775139
2008215	3	0.440821054574302	0.305737336707143	0.0583043991208546	0.012483217999808	0.00748138569334566	0.0254183032270755	0.0455371097368076	0.0822822472786002	0.123474007452368	0.114538060544825	0.0222829293124729	0.00101226673481327	0.0172254378477309	0.0138934434312237	0.000513354946031573	0.00344443748141769	0.000645331371003926	0.00170459228521635	0.748144684154441
2008215	4	0.405255080257713	0.482997699523026	0.0510712336846347	0.0289524571857367	0.0178582553904961	0.0266367578044116	0.0496643926055372	0.130333819701782	0.109913516733585	0.158826844774768	0.0174170762434118	0.0011108338332787	0.0229794671421047	0.0167009109483136	0.00050823700010471	0.00337701439561576	0.000678300693039262	0.0103625241828287	0.717735004921778
2008215	5	0.366185256917707	0.577041288349823	0.0451852324859205	0.0380972878511187	0.0380317716118457	0.0301134124612969	0.0709778163982168	0.195043141215398	0.075183808098609	0.304227984232144	0.0144173191439899	0.00112400891914052	0.0214152407272425	0.0155505524827535	0.000496910906424988	0.00349867173325066	0.000678354594092532	0.0193641000231734	0.679819890780816
2008215	6	0.354315737366096	0.653979654544281	0.0413469203875096	0.0467127650850548	0.0180947458140604	0.0468893381300294	0.1009551246977	0.314550188868778	0.0290696268383034	0.376699185210025	0.0138740169608401	0.00105606500343842	0.0197519380601845	0.00970827838335646	0.000667513747515622	0.00363306471265055	0.000646169908727344	0.00581630014329035	0.724329789123919
2008215	7	0.318309003113181	0.681851982273901	0.0656218365673721	0.0907896430326499	0.0284005384776232	0.113618307264307	0.177949028799879	0.400055139206205	0.0186370100150919	0.35759584224748	0.0139422635511145	0.00185786621878036	0.0163873255376274	0.00591706189829715	0.00116825202884515	0.0035981930626114	0.000682272225023134	0.000700590115030843	0.715421939823544
2008215	8	0.271795423267229	0.609565956387094	0.155353125766822	0.178159014156476	0.191647534815328	0.273041558331689	0.291837126084515	0.415059921063142	0.0207036368481372	0.247820834852942	0.0144655439866917	0.00268120139541258	0.0147608013761015	0.0053482018213902	0.00198707212829183	0.00630784906858083	0.000744329864122353	0.00105224507950822	0.740397354271536
2008215	9	0.268130533471213	0.535035465702273	0.206210912203293	0.283740471315163	0.36568444248695	0.442394423609252	0.291023864409242	0.41670498103338	0.0304370086185711	0.18276748665731	0.0148109306614079	0.00434401687357739	0.0121860154900721	0.00569565487413592	0.00210421552672272	0.010261419620255	0.00108570803723638	0.00123154318222636	0.740795343385167
2008215	10	0.237233398784849	0.493752403086471	0.215079180346857	0.390310938835129	0.43639557699419	0.445747041404547	0.223579884954352	0.409023724860611	0.0427760545219741	0.175895670832872	0.0141865706817058	0.00498160235782745	0.00898415209846987	0.00457936412275175	0.00197169372295622	0.0109426221386173	0.00132855262205855	0.00163521535426429	0.712990658907619
2008215	11	0.193466079779266	0.448836319908088	0.192894892858534	0.451273596468204	0.446518083847198	0.39228740590186	0.161069286284554	0.392761834460336	0.0626026900083151	0.166054192739131	0.0151531045999364	0.00511702855192559	0.00434978610646085	0.00242799903609961	0.00180835417089927	0.00587038428509441	0.00153673041600852	0.00307640703942604	0.670168739804708
2008215	12	0.291039782254413	0.417145639607368	0.182202470530554	0.462994226069513	0.429548377860079	0.36404007824174	0.145447288735748	0.359958760418556	0.111269369351281	0.160965716175516	0.0173550490020563	0.00528731116275973	0.00171219401916098	0.000966237000089705	0.00174008805747484	0.00112388832548933	0.00370749031895987	0.00942054780556508	0.621004425367434
2008215	13	0.380844037047701	0.432623156828018	0.18962923305799	0.462261621348579	0.423197588403465	0.336712327006236	0.131714868892151	0.294262741408354	0.192270070025794	0.160124545759267	0.017145433079673	0.00680147794579111	0.00142592667117304	0.000525254164914402	0.00198891283179426	0.000760712346209117	0.0924795824593029	0.037638859411742	0.545361609463457
2008215	14	0.523939194588399	0.441278959573899	0.193371582260388	0.43020418076482	0.41937414420155	0.309597637076605	0.119354607357092	0.203253730650062	0.222147029424836	0.127944510402692	0.0168522144752111	0.00750257826115575	0.00324152049511017	0.000620632176025522	0.00251765139900255	0.00218462636571066	0.205991912889286	0.109579126456722	0.460285823436045
2008215	15	0.67252713695931	0.411302693021647	0.198251630586635	0.387076012832576	0.391505627305634	0.29842884479075	0.0940012843710459	0.215023334909966	0.213611824122906	0.10239591086947	0.0201581165706859	0.00803299603175413	0.0095245422795987	0.000798861954696369	0.00331263570872675	0.0322647890014188	0.282013401251889	0.212556371960773	0.446825140892015
2008215	16	0.808426247613314	0.398848374841868	0.207017523351883	0.333970355391355	0.280242628495007	0.321726678445528	0.0779696031219426	0.303489192659477	0.17973065551575	0.151510879765072	0.0239029950127048	0.00854579525248875	0.012021989646298	0.000761415648957708	0.00396893133497356	0.129630908030754	0.331703230462594	0.238914755163175	0.474999732410279
2008215	17	0.779324315862153	0.399454991315065	0.219965933186605	0.313392267829501	0.200243273981809	0.368210294669192	0.0826851747741542	0.379022148374543	0.135853691977071	0.301454341643025	0.0270189745785793	0.00885260805096491	0.0192680128881301	0.000282615450566354	0.00452554627768381	0.192493403134115	0.180055816072997	0.227635687814928	0.490710623296278
2008215	18	0.749957045965643	0.396306188473338	0.234060965422732	0.301999486596757	0.21491987707759	0.400145524155449	0.178817054003949	0.457713681525051	0.106168806536188	0.37326583520925	0.0299645393173631	0.00885076529569534	0.0424480747254163	3.49738421418542e-05	0.00474694345154802	0.212371480786083	0.408185746021222	0.163553847231063	0.518110869363819
2008215	19	0.874551902554681	0.404134359208802	0.230309788878872	0.28474740559761	0.318595576267649	0.410268672336544	0.303878741606833	0.595174848515541	0.082297753746682	0.426267122896138	0.0307242482031742	0.00863216577913013	0.0812666294880142	2.33679510173934e-06	0.00446465340294724	0.220211306626124	0.502560818592345	0.131000149251005	0.600542981744156
2008215	20	1.10952080436114	0.43513119153501	0.220103048888974	0.271235747772974	0.377892116042603	0.409047703712286	0.369673115194399	0.701670992276353	0.0723467545239592	0.518408161958687	0.028978770167914	0.00807625303554398	0.122012280425032	1.98216564301656e-07	0.00410083762470917	0.221020770613113	0.555840479365874	0.126330448985416	0.645728878813345
2008215	21	1.27062810450526	0.462213051443851	0.206417293425723	0.2836487036731	0.454526082512785	0.404121500642742	0.454056358897954	0.751450435969639	0.0827188419573959	0.573932175181406	0.0250496802895585	0.00648675571230989	0.158969051477466	9.33824161631455e-08	0.00389384902140901	0.219057504242294	0.588902859648725	0.122144220659808	0.572706729526923
2008215	22	1.34996360252	0.461916702897756	0.192055707668254	0.288996946709544	0.581816595286082	0.392414635115716	0.554982922166334	0.779138988715275	0.193468579887662	0.612828904361949	0.0181091482070483	0.00413725066048222	0.164540478769399	1.92912339197399e-07	0.00352131590041644	0.217300930070086	0.582895373735108	0.10626111858481	0.335643051029589
2008215	23	1.09233898793244	0.43972974845984	0.179326212780632	0.285367901020518	0.657962555649016	0.374272434895791	0.576745862126881	0.811392109334187	0.31508648056126	0.75283721794853	0.0129407227200846	0.00223796544017168	0.163319752218457	1.39421429798672e-06	0.00308702676973194	0.216785363957	0.550068424293014	0.109345412278775	0.491242110174833
2008216	0	1.06470700011182	0.411793555098451	0.171136174959968	0.295542289600361	0.663572699093565	0.373455501455131	0.578661565339816	0.795738906624659	0.375392141094831	0.904892630528697	0.0106404315876313	0.00124899778997618	0.172715308859796	1.50875213695367e-05	0.00261036668809153	0.21784331872311	0.476316293124693	0.224308202746367	0.516809709345298
2008216	1	1.02408171522425	0.394156172389724	0.16688433942779	0.344240691018865	0.627774765253205	0.366726418845835	0.71881326049835	0.605104710239004	0.446535263226209	0.887151127661387	0.0106473013642536	0.00092774186245086	0.197534741484141	5.24532970881851e-05	0.00255828241040195	0.21816403216324	0.474075307847359	0.356886106105085	0.436265843496065
2008216	2	0.50493701589658	0.37435799708548	0.164424084851117	0.400907393867155	0.561505788839453	0.347044855495051	0.940142259819257	0.468116177949331	0.507824390558544	0.47972252050652	0.0160712330402341	0.000674789190106095	0.205688150481417	0.000270287465155309	0.0030126466443389	0.214047766428947	0.524523961029828	0.379688630962057	0.449752011716048
2008216	3	0.34706448083087	0.342384959574973	0.211251425543678	0.422296870027427	0.506296597059126	0.313527753558985	0.735504523460255	0.449964194087399	0.544393973332102	0.275396336851173	0.0264171107065437	0.000750300141490939	0.195836578441425	0.000871361148211454	0.00963064706660121	0.205650651067065	0.56622556083709	0.408831763388492	0.352393497576248
2008216	4	0.343571313684426	0.314859911621349	0.214815429962882	0.425979569097065	0.480684786846772	0.271394581463446	0.372719482052132	0.447817181960559	0.744834508644721	0.280089935453492	0.0387832624206161	0.00158582363855864	0.186432852334977	0.00203132357161882	0.0186709700349253	0.197553898905812	0.598816510502205	0.473722407820817	0.266592878742544
2008216	5	0.331715336384581	0.294281812309126	0.222305469842506	0.427514378213622	0.46985666923535	0.247159674336097	0.204341326512279	0.373871773943252	0.825348308367552	0.284289331433336	0.0560774315730185	0.00234413970302451	0.177839437381443	0.00304879114966505	0.0549984585549667	0.221447134460692	0.645721381301581	0.620617948693376	0.177498978659681
2008216	6	0.290154966916499	0.276608420748204	0.293305437005416	0.418314537413928	0.455504012551254	0.228948545488263	0.19287505618984	0.297185827979676	0.521347846495604	0.262869427284231	0.0648082984422883	0.00265204382047367	0.182338319269029	0.00419527156569386	0.177596501579104	0.239200020656991	0.677771126143367	0.799508542912309	0.158894746524108
2008216	7	0.234158507188949	0.285174475267728	0.45635152353011	0.415533735344353	0.429311966924273	0.224296919181616	0.226503649174489	0.239602302837426	0.37292499584218	0.261082055895046	0.0867884393540024	0.00281580031083055	0.177751727125724	0.00597883890793217	0.305028962277719	0.239537788981459	0.66877721501485	0.700431076191537	0.174530049158619
2008216	8	0.197079742414402	0.439645533045177	0.569703386829601	0.414851416749921	0.388454780383011	0.259748108127271	0.221640312980156	0.220405699292987	0.211022307893737	0.269298339261813	0.126087915667407	0.00319408250932066	0.139515612540186	0.00714206838040985	0.336816979570394	0.240936769727905	0.651559846481543	0.268725999382711	0.193411695224866
2008216	9	0.187872375314536	0.557102302923086	0.616149586430553	0.405718437181218	0.294186906354585	0.309953590206176	0.212908618707586	0.261727661121811	0.162966163958182	0.277010528208713	0.151784114045488	0.0030979291531755	0.109942071989481	0.00941851746337042	0.336792235413461	0.233006748796295	0.635768526639015	0.188988242905269	0.128096805567508
2008216	10	0.0833713689450307	0.451520259505866	0.641761159267243	0.350442988869784	0.173193847623908	0.367643251088057	0.203807357383474	0.300080414574391	0.181519053886715	0.254778329393676	0.162510246046391	0.00305113148559285	0.10541116060044	0.0179408752469755	0.315672588725858	0.222928224427072	0.577154810797361	0.208720462060896	0.0527323758887342
2008216	11	0.0366826710939828	0.418499098889129	0.500339331645218	0.3198071184309	0.163888700866257	0.437870825109169	0.180900680510876	0.287561466090134	0.19299748174928	0.231517523676161	0.164505533630374	0.00272374442556585	0.100348941971083	0.0377784490271517	0.293850482188973	0.205402644990828	0.46137675924931	0.215020992195596	0.0526871095452762
2008216	12	0.0759879356094808	0.279186716608091	0.430322812858971	0.356747504518692	0.154368301255618	0.429111934886814	0.150623639080441	0.258980615209938	0.186420557799524	0.188152019066222	0.160160933266131	0.00232762999743747	0.153792184061535	0.0594202301089216	0.272318313382838	0.191764474510021	0.37929105661308	0.201473009840003	0.0626773276955639
2008216	13	0.155059027408427	0.184886634628846	0.411041641512156	0.380511502841504	0.181548605694044	0.398563015278152	0.119033721705857	0.197665685947676	0.176147751265007	0.160917792133985	0.142640642168101	0.00192763956211877	0.237854784332078	0.0789220358840727	0.261942520971676	0.21252771860741	0.351352187041698	0.189472356390741	0.0396798242956128
2008216	14	0.178489265916836	0.149613658253419	0.400781980760355	0.35998493968027	0.177674753718711	0.357941833895701	0.0656455600915569	0.0689994911578574	0.16489991683711	0.276422151497514	0.132504559677069	0.00153236460047017	0.299713851473622	0.0943461463230416	0.25623597848914	0.231495984292924	0.363205114158476	0.188347686190461	0.0235517463763474
2008216	15	0.19314867979521	0.127439772927149	0.400827291095633	0.310675653174164	0.150445419895484	0.317162034834881	0.0370233194648812	0.0586426347667021	0.145812986990896	0.487689671449846	0.121431909662073	0.00129684406898968	0.339597896462125	0.0935629255022821	0.246230690967614	0.230618378846201	0.405000919479827	0.19989840199682	0.0120604583947325
2008216	16	0.199638938418149	0.10928395904293	0.41236620251509	0.263608346603716	0.11167075612755	0.266643372349765	0.101878688430778	0.114836845560508	0.116443278943848	0.573054421059464	0.108220264166184	0.00109454209096347	0.371020135956205	0.0829859761036384	0.23867133138457	0.24026823964509	0.469601179013308	0.196364971784694	0.0118374285838992
2008216	17	0.209841869173159	0.109540474093886	0.420272276771554	0.196090689002289	0.0775307180053047	0.217013299846106	0.267780307635845	0.161883232136016	0.0770690037039766	0.542404744872341	0.102310656472425	0.000984435990347205	0.39880929311208	0.0673164503562888	0.232892248921441	0.265691522132734	0.480132686291961	0.179465571205342	0.0178931764437994
2008216	18	0.21905717954012	0.120501653399596	0.415735890789735	0.14619053822612	0.0576304786269484	0.179252472810015	0.321768347643504	0.171181747617433	0.0340271358809099	0.439018475755781	0.113297660907665	0.00112131621405065	0.398514187755396	0.0533824895426047	0.232539588522724	0.305232990022095	0.474072213342058	0.12226974281001	0.0296851050323094
2008216	19	0.232269052925991	0.103538854191072	0.39668610082917	0.138435872331117	0.0459472054592486	0.147599195205795	0.29477866057583	0.174101269029445	0.0298030652850379	0.36607978606334	0.134268531286113	0.00152234019383378	0.377248637194256	0.0506939986792609	0.230772523277203	0.327235247648375	0.46603158967501	0.0868446624710768	0.0591089305651909
2008216	20	0.262203812909521	0.0773608628725072	0.376070700051964	0.140269337816066	0.0401665238687688	0.117269845679068	0.275709873613994	0.162836150485148	0.0900567674173235	0.289712955075603	0.161328731096489	0.00190477948423426	0.37249460832814	0.0458458884385277	0.224802580347432	0.327702884696561	0.441639066501062	0.0957616900892782	0.0877839479852961
2008216	21	0.310921376835002	0.0608343025984549	0.355197361301803	0.135929527966501	0.0392231117410123	0.101638295370206	0.209703399848894	0.0987260651678555	0.232951381863249	0.236400121008748	0.194817762280207	0.00175650354790788	0.484201480702168	0.0455332015793755	0.2176877890172	0.321153518181665	0.398164210661632	0.23567361211544	0.0929383477333409
2008216	22	0.324715255748692	0.0158581819263332	0.365951844921199	0.137879426276098	0.0445799529394805	0.100510055620615	0.162688633231578	0.065759474647803	0.257987030660317	0.205782493324196	0.232265994455853	0.00133587818602476	0.584138012704308	0.05409629722994	0.215003276229053	0.315438021146725	0.386327657803185	0.362550900041101	0.0952671812980378
2008216	23	0.318014599051232	0.00075795866411586	0.359983854807054	0.157242172366845	0.0565533167068552	0.100925664403203	0.161610307222746	0.0495991141297526	0.226507632097439	0.194226188462229	0.259953632184851	0.00168099945351698	0.713734776547407	0.0869985610328102	0.18349609955557	0.308678948621379	0.336447475370079	0.416840607728577	0.103360117828419
2008217	0	0.300297107968587	0.000145795941096278	0.349168219948878	0.156440787789975	0.0748823458196233	0.0936486271768331	0.165979096930482	0.0395658768557793	0.20322703131125	0.166502920306057	0.273267292348321	0.00324138661415203	0.75911798104502	0.1323920596507	0.174627208467781	0.305133536663459	0.271814369604906	0.417422031391722	0.13472585325121
2008217	1	0.263550081197707	0.000174648403077844	0.336299674216906	0.00839156343226975	0.0864784386933476	0.0885247244954904	0.169060496908738	0.0322321983838487	0.160337516965619	0.126266385215136	0.29282234267207	0.00697745621176779	0.753334856003976	0.173738213816898	0.177073825858376	0.313000085246804	0.213945241739591	0.372876880457999	0.19587698805887
2008217	2	0.235492153750842	0.000354512744375231	0.325772086692563	0.000590726529937494	0.0556087797374557	0.0883560613732978	0.189242075534029	0.0311304731047379	0.129727645691635	0.133520959137751	0.304054576440492	0.00887202261743996	0.727814680475753	0.197637880615945	0.194487587587033	0.314624855061802	0.160578876123587	0.312863809554685	0.235327004932228
2008217	3	0.243108522885777	0.00335924995844682	0.32007604984784	0.00520628297051102	0.029567663025264	0.104549497998721	0.229668489596072	0.0324838296997262	0.13619822068706	0.127722927049137	0.299908346621674	0.00751546886153682	0.717195489785692	0.2042173834884	0.215355220667445	0.313419057019768	0.136414016189649	0.248148353992487	0.256405444973614
2008217	4	0.301689807772348	0.0209865322758424	0.307210120149268	0.00130371242241831	0.0245463857898019	0.162870995672618	0.244348789682853	0.0377233279243129	0.14172926577465	0.114138649235315	0.287291631534325	0.00605562613252389	0.698378394509078	0.205394063880987	0.230237533148346	0.310126104677175	0.139039768655522	0.203766754987278	0.302156456976893
2008217	5	0.358794251644912	0.0456366118856168	0.314901156790648	8.70864876482086e-05	0.0153465358764642	0.206197822658472	0.23406632637587	0.0588159413842951	0.140791452327744	0.105890120072823	0.263316929529974	0.00542367164880225	0.675417825948737	0.20730251089045	0.244451356103833	0.310657118471428	0.162131203678168	0.177050255186076	0.081093223413351
2008217	6	0.342688491565126	0.0622447211581137	0.335337477058699	0.000206935320233652	0.0132823086926345	0.120624723455742	0.182463164471999	0.0868677334967456	0.13811348216885	0.104798436840413	0.256024279589026	0.00504427228135607	0.641063666697058	0.212568711217858	0.273615669936793	0.310632120783804	0.0710537224910488	0.160698985376579	0.00318656575124635
2008217	7	0.240514989041465	0.0639058123507939	0.372918207406298	0.00716854624540396	0.0167125638152442	0.00472105835706369	0.118108079095258	0.107440641044323	0.138413194082021	0.0979691174360831	0.259598277593092	0.00474829384769544	0.373987395851135	0.219952781052365	0.281632925563086	0.305039530682006	0.0130507093251815	0.132091395900452	0.0547663719432623
2008217	8	0.139253039113031	0.0666773058829146	0.432498002176428	0.029696085950776	0.0374588287238144	0.0034025323934396	0.0991512349363003	0.0953677542543838	0.142782824222375	0.0934005500086178	0.255855811615238	0.00461452295496298	0.286322643566695	0.229809375370558	0.254162148338959	0.300466737673631	0.00978035287068418	0.111366270998391	0.23414350973879
2008217	9	0.252267499871557	0.0891888983886389	0.450770190834584	0.0475316664541398	0.083236938214827	0.0134660228964029	0.0935463603534298	0.0210514939215561	0.151972070016455	0.0878779069894324	0.250919990448725	0.00454710815786353	0.24129413511898	0.243737085239775	0.21599663235309	0.29558209329989	0.0182818915965005	0.0982702206274245	0.299177158306138
2008217	10	0.343675002809922	0.097922786700018	0.420036848057332	0.0517236810373923	0.100330130346129	0.0159085792489876	0.0885865899779244	0.0433868505980373	0.159935547848647	0.0855035080607384	0.27077961375255	0.00433776786396096	0.218177822592271	0.268850844527904	0.187504307701579	0.262763232458209	0.0717148627842984	0.090166467073972	0.241314044413767
2008217	11	0.410128757205668	0.0726278773702512	0.378820528149099	0.0444399824433102	0.0953994609984222	0.0149307994468814	0.0876883744241588	0.189473898757112	0.16538936276325	0.0610188057569645	0.304633635957968	0.004019613015735	0.203895144729627	0.287843298280371	0.16966083496524	0.219385725555792	0.153598716525775	0.0917295863732201	0.23090857845437
2008217	12	0.484897403315665	0.0336218293220456	0.340671229329083	0.0593241672148937	0.200146338844281	0.0152332332293757	0.0897483466799352	0.316986475495577	0.165528515074215	0.0425909513846238	0.355954703292808	0.00374434720419416	0.187383922511872	0.29460865945009	0.164099953076634	0.196406844188548	0.299555975800128	0.0990198460242125	0.223983028483716
2008217	13	0.535999703367068	0.0265658501767531	0.307825095848648	0.0746579265110484	0.39884455425117	0.0128694801997818	0.0827298455087029	0.433801705623708	0.162090929503254	0.0462006094325292	0.418108711961133	0.00353287151664048	0.163384324176014	0.255869364174994	0.149322013035766	0.182096466516129	0.361988534922423	0.105719267583176	0.22099856228122
2008217	14	0.57711794900865	0.0545857397932942	0.273382495105993	0.0676964382159767	0.55022957308996	0.00840483374233993	0.0537572684641743	0.496083088743875	0.151877536267494	0.104381636281182	0.469740355533141	0.00341491385832474	0.121851903204412	0.187037744301544	0.133205912155161	0.154341378094309	0.449053082516345	0.110776844603309	0.233823883983478
2008217	15	0.569925371590597	0.0569589421538865	0.230236854084835	0.0816586759629536	0.626077838611016	0.0134344506673015	0.0291727336922258	0.54579608279871	0.130847686991368	0.224548009265368	0.483083642070689	0.00350680592182437	0.0785135573765666	0.0183747261609592	0.164665448536576	0.1304245185917	0.648679559012198	0.110226902382387	0.2297668831201
2008217	16	0.469201125172602	0.090432630875637	0.204056634134426	0.120168276612726	0.674793970683496	0.0224735665435146	0.0230963506751442	0.547316027455878	0.103286810104638	0.417734954188859	0.341022879852728	0.00405638360991856	0.0488387784617447	0.00292346399871423	0.195461805003958	0.112772019145191	0.704165856474317	0.107611428448188	0.213883526254635
2008217	17	0.394203443319031	0.0803395048788251	0.178586926226319	0.116586490382987	0.750945065256769	0.0214062082586658	0.0252800381734136	0.478060623141368	0.0803727411358417	0.567091854779844	0.23495847714423	0.00495324952953149	0.035597724772157	0.00438763383392612	0.192689989855893	0.0767254252004221	0.6295005413382	0.101309702080606	0.202213167658024
2008217	18	0.534611757483058	0.0673129592680446	0.164453003949134	0.07215302050984	0.803014057618441	0.0524254951433005	0.0672857728707084	0.452129116945442	0.0681430537914871	0.722481715469786	0.264812892777024	0.00572571593540446	0.0329075688507874	0.0113982951013727	0.156653453455418	0.0632154540521945	0.687915685579199	0.0895434166973542	0.180549571477895
2008217	19	0.578613039460491	0.0749751220360104	0.164276658716607	0.0383861602717687	0.682417035773349	0.0902603411913455	0.157361220172271	0.43054220454039	0.060299729119063	0.938017748175373	0.306885956795644	0.0067176600205576	0.043775374224272	0.0258006251012857	0.124460229485418	0.0142022957564616	0.949828427574166	0.0777202537126479	0.161634059686389
2008217	20	0.448502415682733	0.0851534650063085	0.157752061734219	0.038203615924289	0.521014832713186	0.0892787477867618	0.271450182849721	0.313348944225342	0.0526838940406328	1.1044514162609	0.33908483130569	0.00810744484465018	0.0856538303551938	0.0250259398458438	0.0908248386429256	0.00803835245829745	1.11687093528132	0.0686077714328819	0.155175491898323
2008217	21	0.383297140003863	0.116514028108815	0.141754075346393	0.0578471546261367	0.477349766486963	0.0737062449469627	0.332315409064531	0.242842058973386	0.045576184665029	1.1625027090969	0.369504638466321	0.00917290853477568	0.11634971436569	0.0243852855439068	0.0509303203343335	0.0244508438988966	1.14110588340302	0.0648768067472258	0.145099980528585
2008217	22	0.358684197636698	0.113541138035314	0.124689386515212	0.0667606677558625	0.264775953013563	0.0695035491196975	0.53078730188238	0.297176248517621	0.0416235294926813	1.00088265711022	0.430452698242025	0.0105405276638029	0.0997297209086436	0.0320150395471635	0.0280754488304609	0.0270061551164944	1.32826845029243	0.0669952071483204	0.134711485107732
2008217	23	0.380119691263846	0.0854230976242769	0.109837305646694	0.0677897479381226	0.21757258931733	0.0749960956758809	0.61106454265001	0.294563932486873	0.0389307567737146	0.607969397279253	0.625559372360215	0.0148826246446526	0.0722801103720945	0.0455551356781742	0.0223948800272955	0.027513112036884	1.31958062230439	0.0880030821971684	0.128044516472145
2008218	0	0.44344850421759	0.0822754282906281	0.0977721996163337	0.0695664530899921	0.262780331379296	0.0890464988422806	0.560470584219422	0.244883319414548	0.0362397227080401	0.239181278719353	0.720996679576327	0.0222049109872791	0.050075838746375	0.0392564426814089	0.0129096269749613	0.0306451411800298	1.17447059198547	0.134421183395751	0.13329489125276
2008218	1	0.540303423833164	0.120146870945472	0.117177167270215	0.0692701957137417	0.268794433074275	0.104959599610497	0.451337229659355	0.22859686784264	0.0341253676398709	0.127712925035165	0.66819378321949	0.0261859857687466	0.0280051804968098	0.0359242249370413	0.006551160077827	0.0496331894876079	1.17890800046237	0.175182784616695	0.146857399374834
2008218	2	0.674278012988784	0.165804797601155	0.116657480260156	0.0874118584532624	0.300008265595072	0.11931133511705	0.267912376333907	0.274644283465536	0.0370370804043944	0.127316252029081	0.535947299262045	0.0245157416625808	0.00830200318823814	0.036920112085532	0.00720488471596836	0.0765096377779239	1.2858237058012	0.17582853432958	0.16580461821339
2008218	3	0.728218324460281	0.199456972540106	0.108133155353723	0.126514022119847	0.350404386537946	0.111082560928502	0.0990844876793342	0.378044295603168	0.0759936610600573	0.164217712279898	0.468334570853412	0.0230157165679918	0.00162574564279785	0.040119742854387	0.00957522821542617	0.0880949253169329	1.28490203621567	0.132143518926757	0.16542116429001
2008218	4	0.756859300299086	0.218539324390329	0.0955636416324506	0.163059157217944	0.392586992492392	0.0887402594744742	0.0888793552482961	0.410202820049228	0.235031384168347	0.267688924652156	0.438285530482137	0.0221209348036419	0.000510463838691408	0.0401355700786171	0.0238763198856234	0.0950996425431553	0.977826450901461	0.0339283556967802	0.141445936835649
2008218	5	0.775967706774878	0.25721146817038	0.0811782131624023	0.224423907583548	0.441065032891193	0.0807131423275776	0.379546028162489	0.360080836945273	0.35992143825076	0.490697091511087	0.398704779629895	0.0211631291034838	0.000539503507005129	0.0409757155934964	0.0391268235601531	0.0907599423201272	0.827495618351249	0.0188661319051914	0.105620357064049
2008218	6	0.772558424412719	0.322097452757642	0.117911513447133	0.279212090741159	0.478199047979354	0.0836218029439518	0.414448723949005	0.291893263614818	0.326537006917322	0.516322180667614	0.416484259859604	0.0196820633363485	0.00107617511316599	0.0778523358184575	0.0581407004280604	0.0979182728479947	0.828124179645688	0.0233256887137853	0.085442766062531
2008218	7	0.745996894208974	0.346183647839217	0.148205632220473	0.294101864567301	0.438845418362076	0.0844306984016266	0.375508290684967	0.238945004738505	0.171893245852966	0.459663783699693	0.443615656744732	0.0173893423795925	0.00237100604684433	0.0986161915227001	0.0593653425141377	0.0962504152002983	1.21561431650574	0.0204634614961187	0.0811361901537925
2008218	8	0.678389502258659	0.326862956328792	0.103517993423603	0.276996489449678	0.348809560504918	0.100683509855875	0.329236564004688	0.180986388538157	0.123726913957011	0.360375069843858	0.641901851643896	0.0144699523818257	0.00391728444171459	0.0929063088849081	0.0564871791853084	0.0797809394526763	1.28733757213184	0.0159216744535332	0.0869642029884786
2008218	9	0.589533900549481	0.29769038996279	0.0832174151175668	0.249407285866381	0.288744953530837	0.125965735002926	0.315388447770714	0.17672168323434	0.104501141636656	0.294053220235238	0.681557154472649	0.0116511985829467	0.00568989372058217	0.0797511723171437	0.059673746165614	0.0677942161088242	1.18657993815808	0.0127763198654127	0.128074609198959
2008218	10	0.486733397471109	0.267042453718726	0.0746217763671811	0.224946293813734	0.260896360809939	0.144511096358752	0.300330131930879	0.194886349471165	0.0616303584243624	0.253764348825148	0.734856009392423	0.00976225661347326	0.00795748723845928	0.0647343715756835	0.0596110814342493	0.0614322375296464	1.1485690627541	0.0182795494495481	0.215436642030759
2008218	11	0.380089116584874	0.253683044728376	0.0680422849196863	0.201988010161521	0.267093114124058	0.142060334706112	0.257014913886481	0.205041265747639	0.0348263848366427	0.212483711289914	0.787272791395607	0.00871805526395881	0.0105544672987964	0.0563212384187812	0.0568312251435586	0.0594013853560397	1.18891050946588	0.0337559299366256	0.319832030138087
2008218	12	0.286902830478159	0.25388865682283	0.0624708239331418	0.186026243663664	0.30013283861792	0.129830409673251	0.184834897036813	0.217548234425912	0.027430979766457	0.179425435475249	0.669357773471369	0.00771708143899339	0.0109143241897613	0.0504074403864049	0.0529775505769642	0.0629462951197228	1.18741560231885	0.0443602033632733	0.418048754887665
2008218	13	0.255801336354557	0.246345767900947	0.0579481910843931	0.180631981775835	0.299072765339051	0.11843708944009	0.132015769819646	0.219865027983847	0.0420134243963123	0.171684531749195	0.495389366637197	0.00664212708632606	0.012179171109852	0.0486588029909669	0.0515506622027747	0.0687040669419595	1.09469543342512	0.0413709961011979	0.444486168236168
2008218	14	0.246571943075163	0.238831624127222	0.0548414815774943	0.183758289639755	0.259369003784394	0.114991667219038	0.103108247859822	0.222996840370253	0.0769247299957235	0.179565331997102	0.331733894374667	0.00580734897547092	0.0137792957954757	0.0449602906222247	0.0597141164230813	0.0758951784391607	0.956369703197854	0.0391016835440419	0.427298715068728
2008218	15	0.235682386116591	0.236860781615448	0.0528966989727327	0.181015575732628	0.221821650474695	0.10370609492362	0.0878163551076379	0.220629588804266	0.113968156642474	0.178584909590634	0.234434708047744	0.00528633425719954	0.0137226047271467	0.0452216698752731	0.0626846151038681	0.0678694008900598	0.882627709185797	0.03420977560853	0.400624250935756
2008218	16	0.213945658052606	0.233554694031506	0.0515039024968426	0.183810331905848	0.200593168729411	0.0837691344888021	0.082155888827269	0.200298346702944	0.124695860750189	0.177170037307333	0.181669312444644	0.00497524551453668	0.0132068989387584	0.046024070429136	0.0741262198720027	0.0522566838070281	0.794278284581708	0.0295132101657639	0.374377789246194
2008218	17	0.194841966759842	0.219008748935655	0.0500038721633843	0.180712504357425	0.170463784935432	0.0685900282016083	0.0770655397893043	0.175233858567684	0.110002228530913	0.16564562894265	0.152720679750752	0.00486561033389189	0.0122210659698802	0.0419941627676333	0.070510042928804	0.0452707575347032	0.766252852597306	0.0259683676459937	0.36666661873034
2008218	18	0.177193965135582	0.181896343563009	0.0473887134620633	0.16417129585032	0.13290108273949	0.0612053144647045	0.061027149051316	0.151447785603176	0.0667252539157596	0.153725461289812	0.134817525089734	0.00420534889519333	0.0112126415066729	0.0378383584802156	0.0475836975852057	0.039860672173757	0.799673743233075	0.0238397403447185	0.362327060470866
2008218	19	0.166211312044883	0.136834899937233	0.0402414770455246	0.171501801754291	0.0889961898489954	0.0644085581013077	0.0529163627193673	0.131217408579772	0.033655026717428	0.141008179814225	0.115440741903848	0.00341270526888158	0.0109478317590918	0.0322490339529185	0.043926880536791	0.0411341629132347	0.852426996919768	0.021559679676314	0.360009096943634
2008218	20	0.161255416129597	0.0978986880016186	0.0339318828757218	0.19085702728631	0.0658113732540281	0.0621568121282483	0.047774871151075	0.109800203850738	0.0253674965611045	0.121835413301278	0.0989545816145223	0.00280813347863599	0.0115977274481133	0.0238680923694059	0.0426346105858042	0.0472548400193847	0.938282336365093	0.0190530544355061	0.341357128525592
2008218	21	0.161562517035095	0.0707151025490619	0.0307703830678742	0.20825867667105	0.057779708721188	0.0700151956110705	0.0423695068122241	0.0900849330602238	0.0222878959727953	0.0974007542581281	0.0900498023764096	0.0025454957570281	0.0126739652590253	0.0150395731328868	0.0549039517325145	0.0537806219926639	1.02489104234823	0.0172821228890231	0.032421417612422
2008218	22	0.16470353765826	0.0588585655620885	0.0288548767784827	0.22570348979787	0.0583850214922863	0.100053183008997	0.0369908991839951	0.0796926809581836	0.0205864843336847	0.0780298957281789	0.0812128907109529	0.00224429153850449	0.013766501281953	0.010659711329404	0.0823496018783344	0.0605315558878751	1.09819558316009	0.0158714976693027	0.0161045280434121
2008218	23	0.177330658434076	0.0526430688502333	0.0275439044610144	0.239261375842097	0.0645423925950244	0.130715105245662	0.0324996937639844	0.0751288874846952	0.0196024527044919	0.0609911436265935	0.0721102092829402	0.00187859414580391	0.0148626182799694	0.00990723071436534	0.103099886031949	0.0693695642060827	1.08092378371139	0.0145981160747941	0.00942427831354958
2008219	0	0.205623482913382	0.0487027409939238	0.026700901752195	0.252677969764189	0.0725337952650108	0.140689429815306	0.0281082263523353	0.0733865075342463	0.0189590045651717	0.0463414310901455	0.0658748914681093	0.00163717882652737	0.0162486161393588	0.0107165097156436	0.102539313917383	0.0794590634791731	1.04738567861934	0.0138305095738972	0.0261874645243398
2008219	1	0.249533640054352	0.0451462469120136	0.0265008966570215	0.279221172685058	0.0790100533038681	0.12503681155382	0.0242271717373782	0.0745082756031484	0.0182370742870176	0.0404895613026579	0.060678229524903	0.00158893816706086	0.0178034964108351	0.0122510213369888	0.11082555000897	0.0880287782324007	1.05670170676109	0.0136489531772012	0.111133504222251
2008219	2	0.314513533662072	0.0412444971959322	0.0322495155537845	0.301958443250528	0.0842047339963509	0.130274609365497	0.0220820537740625	0.0771205363680809	0.0174091675250865	0.0417804040822613	0.0499307405993361	0.00160266008363527	0.0196579632927344	0.0143526819900488	0.105090828966515	0.0885509142334266	1.0688048479263	0.0137950069458443	0.158786267330012
2008219	3	0.384985091330163	0.0369358148035188	0.0361065008130246	0.319867688077065	0.0880736831282622	0.141267651157465	0.0208098515686743	0.0804962023069576	0.016620246528949	0.0397815057622498	0.028279398096524	0.00151081902904948	0.0219135613995943	0.0168728078953189	0.0995125404656746	0.0847947702446326	1.04813684463489	0.013947999664656	0.149261285365443
2008219	4	0.402897165572033	0.0336610616919938	0.0358408864689897	0.330906257041644	0.0910099755071935	0.106761507650424	0.0200779008636068	0.083693482898231	0.0157193625241748	0.0401880553862848	0.0129742618933153	0.00147229266692501	0.0235643277698353	0.0187770755368582	0.123041482283398	0.0778833465570305	1.02366971680645	0.0140406793841358	0.120482960836808
2008219	5	0.398351521103352	0.0292942133526065	0.0404490407455328	0.333394400715042	0.0938550342929437	0.0795901103962684	0.0251523410953927	0.0856207105262656	0.0152788739317371	0.0451600018791319	0.00785467789811178	0.00147075564559735	0.0282261866841949	0.0197800394426453	0.165332853981306	0.0732694511065922	0.978276010678636	0.0140274328425352	0.179421794633661
2008219	6	0.371753788694633	0.027273515942801	0.0481666141929696	0.343993189101879	0.0963601813724712	0.0664396535444206	0.0328889600967647	0.0894407319371166	0.0151716938530391	0.0445744224123681	0.00601377606806897	0.00149888835464788	0.0403029165060722	0.0197725804479301	0.213025359095688	0.148004353123662	0.942838546180684	0.014021548671082	0.447975830958823
2008219	7	0.283185804545596	0.0288839441334545	0.0541192604135473	0.298403464031694	0.0979531153362038	0.0642499861507562	0.0472347119233891	0.0948045854964989	0.0156132255599062	0.0586270816717334	0.00469659474353683	0.00150561750408982	0.0789357563343252	0.0184932354063735	0.257722256197665	0.16960628402036	0.878877811783185	0.0139581571559139	0.987416283159319
2008219	8	0.141726454800811	0.0329182147472918	0.0541364943869996	0.267242433568107	0.098102258836657	0.0748977329108832	0.0620323121220375	0.107846824097706	0.0173049430561352	0.0626000771516731	0.0037540322725727	0.00152945839912103	0.179968758733776	0.016980585491278	0.25294770900726	0.196034545827751	0.762074064015076	0.0139919029404138	0.797190269801146
2008219	9	0.0631054673295821	0.0376677309652299	0.0531399117459641	0.268713615241702	0.0966015861231891	0.0800831120135544	0.0683409397761656	0.146052735590377	0.0180351227032613	0.059274103092664	0.00317976811606408	0.00154060224072357	0.257331740050832	0.0153289223574828	0.259414424328599	0.191808050885317	0.625773440141536	0.0174275330713291	0.273854403093917
2008219	10	0.0504793272030284	0.0397233527179041	0.0456147977281869	0.277272224158126	0.0945386417741011	0.0867142887965937	0.0723118106354668	0.195293725589273	0.0179618040484317	0.077453741830486	0.00285319434834512	0.00142202371653951	0.325912060052988	0.0138900286818697	0.258960280554095	0.179369217219965	0.534550465177996	0.0181704676059701	0.170110406434905
2008219	11	0.0548335943631348	0.0523544745973149	0.0369502947928154	0.279181745264131	0.0935420713186806	0.0980589083769946	0.0752652943775895	0.226951332857876	0.017606633395992	0.109189746542641	0.00263323128153603	0.00130656457303064	0.361555077659107	0.0125374161802174	0.261445999490219	0.163226630396692	0.462846026819264	0.0287093140497933	0.119964011806588
2008219	12	0.0983825424120669	0.0741050697081207	0.0301639814972593	0.277776335310014	0.0937303487258338	0.107645428013666	0.0736483738962543	0.23157177213265	0.0178396772650227	0.185853550034698	0.00250149295980987	0.00122532729728877	0.34515041232708	0.0103889105442277	0.2683471000903	0.14584013513206	0.420716007370288	0.030088302273907	0.088043530548433
2008219	13	0.172504616402549	0.0873181683403857	0.0271439443587155	0.277962817957155	0.0957761115078311	0.122274309762934	0.0755534192930929	0.228139377449906	0.0182300686846704	0.234279845457068	0.00245095196735987	0.00115207512014195	0.325087229168462	0.00838898651521701	0.265168532174209	0.132433232925413	0.403348894901004	0.0280451730226283	0.0628639547654497
2008219	14	0.191003539905807	0.09653981262818	0.0242552306627826	0.260822204836526	0.100370315644627	0.141486022593631	0.0934117808491197	0.217072284872213	0.018313654344801	0.230725344714378	0.00249590960751858	0.00113631147592263	0.31309229153516	0.0138137800464209	0.258995158352613	0.121842432331997	0.393994779935574	0.0220619871827333	0.0425976520445119
2008219	15	0.17174326731338	0.117046018897448	0.0218546105785267	0.226489314319786	0.108602959043255	0.161197511213104	0.132757538146992	0.198752107970472	0.0185234596590225	0.18469172611903	0.00264548582387018	0.00113150890020875	0.320001866560152	0.0335887040698457	0.250076969593152	0.114864255454284	0.389474247259592	0.018954577754606	0.0309739465598826
2008219	16	0.144357143759604	0.140390188095697	0.0196884213360514	0.170930880892028	0.122196140033679	0.177970829964434	0.174741791228967	0.178407513821943	0.0195900091054119	0.100654545415341	0.0029644348077162	0.0011418099186525	0.338348606106932	0.0290953230230048	0.252050915309419	0.111461634011681	0.382056562938793	0.0180366158331894	0.0259289105252574
2008219	17	0.11020052491231	0.160618510310342	0.0177009863705313	0.114352469581646	0.140342468992462	0.192035886701676	0.193162619283875	0.159686482288273	0.0225192108258539	0.0756719397967289	0.00357808240835641	0.00117649137461683	0.364586195139536	0.0512243309946375	0.277072346531959	0.110312463758848	0.369391497451771	0.0180430599498968	0.0230290625608923
2008219	18	0.0819767916670894	0.168600696234898	0.0159783941281151	0.0842727770179694	0.164627279054152	0.20512179590675	0.189776678774975	0.145873110089345	0.0271045159529564	0.0760856187642877	0.0040928144383435	0.00123245106853598	0.380107160372917	0.155652432193312	0.292291541365373	0.109976349605052	0.330072284179429	0.0188150155047084	0.0209669968144029
2008219	19	0.0935991653820247	0.170337499253317	0.0137556217617361	0.0715644455293299	0.189399609951937	0.213191962086744	0.181179722295266	0.130500469808333	0.0296471770022035	0.0805427609895165	0.00454307970156731	0.00127436350289463	0.385616923950646	0.196873590853064	0.295106574540496	0.108203812409105	0.229034008679112	0.0196084679570804	0.0172675901757641
2008219	20	0.123412120093008	0.169915648851178	0.0121583876361182	0.0633394952284084	0.205065185796973	0.212091636664543	0.162719009924929	0.104653185731784	0.0326646259443144	0.0845897054346706	0.00498026206662729	0.00129047607816666	0.385319878630901	0.203524032981861	0.286776824066776	0.107554972815542	0.10819533906642	0.02204134782247	0.0141842784486269
2008219	21	0.141871494859331	0.169338125668296	0.011868008277098	0.0645754569688698	0.207013309160719	0.207986657409972	0.12968088923169	0.0859393942506014	0.0326017128806353	0.0738584389659929	0.00527805701452418	0.00128540062176607	0.300116692851942	0.192602546318891	0.267712381204105	0.106923671019122	0.0563202684047127	0.0286825266021281	0.01402140077374
2008219	22	0.260533237650447	0.167108859109865	0.012113424611208	0.0827330111137234	0.206112944265838	0.203012676228507	0.119271683993081	0.0832950305173299	0.0290649737007927	0.062479384889419	0.00539779320126484	0.00126377764046458	0.136410290123255	0.209987786737005	0.237860330022439	0.106769151087861	0.0460499017918382	0.0280808646055565	0.0138719511536966
2008219	23	0.465180055654756	0.162115257661775	0.0127808254008286	0.104154887498714	0.199010738393474	0.193174318175474	0.117910822660623	0.0962332098719256	0.0557356939232371	0.0944557262256055	0.0055278372344018	0.00122744702456411	0.122258184845411	0.247156529536429	0.196425938891296	0.106885166633703	0.0439895329555305	0.0231618513666867	0.0186385833420438
2008220	0	0.543107448170439	0.157078470782052	0.0145867079301867	0.111475766966472	0.17774805046663	0.181739162089777	0.0935686793589229	0.150761315287576	0.0962502773849505	0.119713293453937	0.00582611292830063	0.00119950985018085	0.125749799482929	0.25275953094759	0.148283948512485	0.107216695572793	0.0408198842430243	0.0337660434267853	0.0194459805157031
2008220	1	0.494583356594063	0.153912181056269	0.0156734619720856	0.113450762446782	0.144127662412135	0.169105766961237	0.0732278150923933	0.205194482370944	0.133076069755674	0.171937019031208	0.00694572049498761	0.00116734200737016	0.0416840742326948	0.239226603801023	0.119758006122439	0.106676300074969	0.0381569228742385	0.0910334162327694	0.0195748093979673
2008220	2	0.392428514076871	0.152034553291536	0.0166357360389804	0.116278404463159	0.124355861419577	0.154481655316122	0.081829256538892	0.240467447957701	0.162875253888822	0.406847524323002	0.00884380479428795	0.00114904745214214	0.00770121461027583	0.228000485963859	0.10427517924647	0.105283949802974	0.0369359848668464	0.159208097374344	0.0208277119328219
2008220	3	0.321183173902254	0.148657833756877	0.0155868800803351	0.116784095560465	0.116310351042236	0.139337683319625	0.139519494294002	0.250180576443154	0.177055775178373	0.46146092312789	0.0148348259629854	0.0011315976088672	0.0112822327845828	0.215690810818945	0.093764603085827	0.0998234220827316	0.0376666222572677	0.194258973579241	0.0231220922352518
2008220	4	0.234699709685718	0.144049148356038	0.0134966444181575	0.114666515912984	0.111305271752325	0.122106416781541	0.259578270774579	0.254341309842187	0.157088514569637	0.421458948274768	0.0294722472252935	0.00110787792288583	0.0570770017596271	0.197392669814438	0.0885541891382882	0.0945485705379072	0.0396227967271892	0.212567622598056	0.0229280820898672
2008220	5	0.153933980547016	0.138930335912683	0.013670025999892	0.112967722882361	0.107714617591234	0.110602563492165	0.344535260637181	0.214767073319698	0.14295903731629	0.404943557414753	0.0526845609836929	0.00107700705970221	0.225686776838525	0.184771677635175	0.103276607598679	0.101617295725383	0.0416469262609452	0.21426143794569	0.0211446049338398
2008220	6	0.102518678772751	0.138134252552575	0.0128219759653087	0.117703264198533	0.105074536082487	0.0997573068915897	0.385049471417709	0.202030855691111	0.237428554647603	0.389584804570731	0.0807900998934822	0.00104901229351517	0.328139722939865	0.124113561752342	0.175353157736759	0.108744964130044	0.0411509252487203	0.182663312559732	0.0191589362988187
2008220	7	0.0720295858503086	0.131450333903503	0.0132878853823075	0.125046878158961	0.107231941372383	0.0920746786257535	0.357929675975638	0.18693741924395	0.308275775861433	0.305003145820924	0.0916928157887242	0.00104545229199876	0.278345166480065	0.0813673913940554	0.227663354038949	0.122329057209369	0.0395322009346287	0.262648892942995	0.0172425886548483
2008220	8	0.0521055756184699	0.111255955413583	0.0135805033548588	0.132181464571243	0.121132532794922	0.0859230781980275	0.277391867262719	0.191232791360098	0.356844455591696	0.193535153687012	0.0827377236968289	0.00102242929482475	0.24882978328081	0.0336422367242126	0.266217479231949	0.12911869752959	0.0408043605079942	0.333094602560236	0.0132817230107062
2008220	9	0.0371166937175672	0.0899079646460819	0.0159584810347306	0.125053485594792	0.173700997555569	0.0800485430000619	0.179335982463769	0.212225881267762	0.395657933024947	0.107174885047232	0.0757297021192687	0.00102052218335268	0.280982826231773	0.00881436358039058	0.241656742391896	0.110255239141195	0.0485803325398027	0.369827685941752	0.0141294770890424
2008220	10	0.0301716408855122	0.0684419778898224	0.0245874668949686	0.0995105273456459	0.193715768937592	0.0735027692319628	0.0940041126303223	0.202883713326434	0.396916812813175	0.0608963230997171	0.0844909364134898	0.00108647396114453	0.2746240746353	0.000403643522326851	0.231150024904785	0.0904247142016494	0.0578820045113174	0.377801461272333	0.0279225044356499
2008220	11	0.0279241921985113	0.0534996161103445	0.0419319018534399	0.079463063153325	0.165899257191556	0.064104867249196	0.0462038170049781	0.17935704352049	0.347327000816866	0.0434767788851877	0.110060048546573	0.00113011240300644	0.243853012496435	0.000162536526343292	0.222198065214203	0.079122308314689	0.0689859796031064	0.379581476277915	0.0218078679740839
2008220	12	0.0264666949778738	0.0451534395281495	0.0475812239601998	0.0666543574063347	0.120543937141864	0.0561590726994164	0.0320866386446881	0.143051645929087	0.201954392365981	0.0329093248459725	0.166399546147715	0.00117322118051421	0.22057007296542	0.000194411375225831	0.214048465335431	0.0672993732709722	0.0765782188237392	0.347641322429585	0.0138179794452172
2008220	13	0.0260359702421398	0.0404322163746149	0.0473379840405657	0.0561163105560372	0.0949201709619984	0.049545087942783	0.0235297530135832	0.121834716205741	0.10528779438761	0.0288145464070983	0.215952045333442	0.00124672690768206	0.214259559203769	0.000279000382047558	0.204732155477489	0.054876297833542	0.0753122627143489	0.234607831559115	0.0132094027618791
2008220	14	0.0270221000350269	0.0369410187529601	0.0470052459985951	0.046385315364611	0.0813714652421543	0.0456014410665882	0.0220826036692189	0.103691109693649	0.0958517683869649	0.024846176016867	0.249931966377815	0.00146594991071885	0.228796236428734	0.000306720519343295	0.192263721932994	0.0454526452714424	0.0704038819881262	0.10625621902808	0.0130727168166848
2008220	15	0.0316086967681236	0.0352014916080445	0.050890104973741	0.0413478910805331	0.0708773458308498	0.0424846390653932	0.0234176726761965	0.0869224575731536	0.100232750420091	0.0252773353870402	0.204731682973841	0.00172773011254486	0.243468965905129	0.000212426206466301	0.179475824029685	0.0406505347987023	0.0656518509689672	0.0708904971552228	0.0120116160898717
2008220	16	0.0377680941586454	0.0350062711133623	0.0496723244446345	0.0390065835558223	0.0613149963657745	0.0404733279595318	0.0263563000232076	0.076509598323627	0.0990915935930931	0.0282949622407175	0.205946846504576	0.00193061428626276	0.243983163184538	0.000131604860745458	0.169721019586788	0.0384637776294778	0.0622782341713648	0.064643362475837	0.0130394047017945
2008220	17	0.0306441220839084	0.0321448842241549	0.0430918731409679	0.0381257469524023	0.0531764958227461	0.0397318990146561	0.0299787392705724	0.0691513124491698	0.0952030024290583	0.0321892561455914	0.269763928525152	0.00211452603979834	0.241061595267983	9.11763080263472e-05	0.16152718472498	0.0406152281127331	0.0605698208982982	0.0610623946526967	0.0163503408520344
2008220	18	0.0269454583469938	0.0210087756974369	0.0241656583692878	0.0397432871911063	0.0474390506187557	0.040177949693435	0.0275325783920459	0.0596416263188126	0.0949312862074909	0.0409599741757486	0.375965422108052	0.00243906626543027	0.231286662822469	7.04872390395595e-05	0.151520146315156	0.0430677839580152	0.0597503527008496	0.0563211227295491	0.0241760869540677
2008220	19	0.02489322331585	0.0151024604034676	0.0129856543039958	0.0396330216732581	0.0453761179820253	0.0393948192487288	0.0169733412760293	0.0248541793529487	0.0931437759584296	0.0439068746890238	0.493808927423657	0.00288247134671789	0.231783856591331	7.73259640592076e-05	0.13335553588422	0.0413905307109837	0.0633439702206656	0.0526653694862581	0.0298920096687255
2008220	20	0.0207389068387943	0.0128739777408947	0.00771068122710272	0.0377910715586854	0.0450505445606804	0.0342394884819333	0.00616351090818407	0.0129000436213849	0.0729920845695443	0.0354946120413854	0.528142455329248	0.00325844174127928	0.228582794977979	0.000132398899951619	0.105043028874302	0.0390470098041138	0.0720972970754285	0.0416156720227002	0.0333656398230026
2008220	21	0.0184435931953201	0.0114490230248291	0.00362636281114067	0.0363668628297099	0.0445614512583569	0.0241199865681661	0.0013555796428297	0.0094290292837821	0.0555046682899219	0.0279844125622825	0.67363732414209	0.00341256648698556	0.224366264102962	0.000214866198287227	0.0749710744302925	0.0385884352283162	0.0735318068004552	0.0324391392419427	0.0671423355154375
2008220	22	0.0176272949140628	0.012136255753499	0.00465367518065337	0.0335410502004602	0.0374936979047789	0.0153987806110853	0.000338934929956227	0.0122978313937467	0.0443332217130033	0.0249691040457635	0.70019150601568	0.00347479111907695	0.226673707658333	0.000365406702769625	0.0646669674361489	0.040566409528541	0.0746354454403092	0.0328482088802257	0.16236691283017
2008220	23	0.0255561992068693	0.0122321873133553	0.0244378910376723	0.0263311232413542	0.0279351992795132	0.0137709935387272	7.49743600574892e-05	0.0153105534891352	0.0383938041546372	0.0229295287400105	0.702461437780224	0.00373134870712339	0.173332147680006	0.000605225453378289	0.0605127959114354	0.040742242053779	0.0769367396490088	0.036169861667638	0.309698652295977
2008221	0	0.0254473877278188	0.00782901591974434	0.0762145100909009	0.0158398217198772	0.0214705671831201	0.0170496834806921	0.000368001356901837	0.0142940317716255	0.0127292457842335	0.0205322910630756	0.63599187595565	0.0046182803184848	0.0291178788182736	0.00076731961209429	0.0568601840633038	0.0380045918360662	0.0765859304251999	0.0374537789076231	0.386321010737463
2008221	1	0.0255229729000589	0.004573027148358	0.101488103627451	0.0137829391537058	0.0141349377376661	0.014909671373868	0.00587166163952707	0.0150654502759995	0.045399628142235	0.00427223369460353	0.565401940131941	0.00669574565296078	0.00744156581777699	0.000859596250776133	0.0517438818251591	0.0349248692625173	0.0691389071936306	0.0116277181005395	0.450650310529562
2008221	2	0.0360254746993203	0.0234289439118096	0.115790432652545	0.0114319775036005	0.0136377278621037	0.00885538386227363	0.0098077397453285	0.0185657841471822	0.121213904490185	0.000222604239757444	0.620118481189289	0.0107998116504567	0.00549609176797856	0.00100558152598449	0.0477567861028094	0.0327376112434048	0.0687939326149027	0.00080398099108713	0.544500593884459
2008221	3	0.0556559693631099	0.0640757552249661	0.222005681975008	0.0105152976766674	0.015942950857482	0.00572428603004465	0.009688402264953	0.0299688308215293	0.098022441669784	2.54741836566822e-05	0.619876471107234	0.0179766159015978	0.00343391033688705	0.00102229160741573	0.0404942463432376	0.0311448386456109	0.0701321929789851	0.077334576563854	0.559322811518156
2008221	4	0.0842504137670029	0.0786604735170061	0.359319566818917	0.00788319315885884	0.0185230285537804	0.00503926387206354	0.00985899349057901	0.0577118653633356	0.109634575130463	3.62588153832706e-05	0.527574148693486	0.0588355584015352	0.00250995125963356	0.000921993858936188	0.0343060388464055	0.0302862455903689	0.0645388177846989	0.193252409730795	0.547095342596458
2008221	5	0.13776591557635	0.103747788105608	0.394321735946938	0.00825784506183291	0.0269128728872288	0.00662076186034221	0.0101551607276903	0.0844245608616509	0.137531921308858	2.50474637994094e-05	0.431047302359918	0.110937165890842	0.0045175983020359	0.000834358939151422	0.0213121882745917	0.0295614188183314	0.061138859540609	0.139392132311747	0.488820783382105
2008221	6	0.189024808243635	0.200084711343113	0.368511104271266	0.0328334813548767	0.0536128845566086	0.0240579841745167	0.0117257230760214	0.136697023816218	0.176881902798678	1.82801170583954e-05	0.548644216701821	0.176275531560139	0.0126116438202625	0.000658816439927116	0.0162850680516473	0.0295114180081692	0.053847788365581	0.0555058908980744	0.241033915270402
2008221	7	0.36355072461616	0.287290234282831	0.305045333212329	0.0660480471735521	0.0941977537743333	0.0545395718249086	0.0108872981726638	0.197695454395246	0.227457761367116	0.000452003031647553	0.771824645241252	0.259576514286912	0.0200015979052029	0.000754398010335459	0.0218046303197186	0.0304962468416064	0.0607901766984578	0.0442921748313247	0.117909756420238
2008221	8	0.850391945369735	0.315310717572324	0.234261916371182	0.0899216563675099	0.157914542929841	0.0642616087977277	0.000101720567778438	0.234309997243738	0.221710569391271	0.0118834374086267	1.1585781880044	0.335593261448284	0.0229654502699721	0.00214577251098964	0.0305695492875767	0.0276723156026116	0.0603713273338863	0.076929340570494	0.150124283487109
2008221	9	1.21640177810065	0.300381155887031	0.17826932479048	0.143696566873082	0.203673212472808	0.0515948887529969	6.41783534394904e-05	0.234429118572553	0.26736934900609	0.0713109874119852	1.55017545586041	0.314171590987225	0.0165600804845292	0.00389159571818893	0.0416054862599436	0.0240922626082519	0.0589492970405364	0.096594543243156	0.126891652992097
2008221	10	1.19333604860293	0.246571130755903	0.18856923170367	0.183521074991355	0.230247402411412	0.0467817253338083	0.00234416954368819	0.201232973755436	0.265551339850643	0.219901504100401	1.59220958001062	0.278717083099811	0.00993907274769703	0.00479944414016495	0.0454601264165205	0.0195970540245939	0.0605244975247122	0.0682563714763798	0.136281920154831
2008221	11	1.35175413508942	0.167456856587171	0.235883583866948	0.202445883962725	0.258223880583196	0.193037134279415	0.023316713868546	0.170526556973656	0.275249526922922	0.441830474603693	1.69591111657897	0.222765220880328	0.00735404236866321	0.00784764080861812	0.0454765296149571	0.0101067640508348	0.0490010698537976	0.0294871661982034	0.384843588277135
2008221	12	1.82875610802359	0.0903525805919267	0.263904657284204	0.228261150758045	0.251763524023804	0.221330912572636	0.135642555392393	0.127767200487331	0.17668250137729	0.787213465909742	1.76128510082588	0.150726403451614	0.00651434084931755	0.0134760809000264	0.0441923379558216	0.00659028721010623	0.0555382009011047	0.0150722921615007	0.96819519577862
2008221	13	2.33384138830183	0.0709444198821133	0.200139384765676	0.217909441982016	0.238339524250706	0.164990346740309	0.301031265067943	0.120443472283631	0.0526575934746265	1.02511652754237	1.50912803778291	0.108508193097923	0.00609205426396525	0.0157094105337391	0.0455821578337323	0.00929730401550218	0.10284923589124	0.00839814717093227	1.4289704276358
2008221	14	2.47313105844154	0.130146971918502	0.062092864219777	0.185376575722078	0.194172688634557	0.0920630351299584	0.442588846175569	0.131665062979525	0.0396600553842365	0.964466590153303	1.36515936194591	0.0799257610211194	0.0067177689188734	0.0151671910819799	0.0454298442803001	0.0296926262542317	0.115142893286678	0.0115054451274858	1.85380288037547
2008221	15	2.93027623954861	0.214672193157034	0.0119897510977456	0.127794187304084	0.230735931547132	0.0271756952903643	0.676776460454947	0.166796793884396	0.0940215933210096	0.749206533497965	0.999731763015443	0.0654852742828109	0.00731479905114413	0.0154455837937499	0.0429282361058164	0.106775652912503	0.103271565844673	0.0237700219434443	2.04030170185666
2008221	16	3.69915942678802	0.190217857262583	0.00752822929192796	0.0902325226340154	0.327599080706484	0.0120591959902426	0.676316072810263	0.232977843585507	0.197183940892414	0.664977911615014	0.598779595447787	0.0477326116048213	0.00794637929430651	0.0156458994194878	0.0372118709470626	0.130272358074111	0.103853973621298	0.0546879409204122	1.94953841312585
2008221	17	4.30284768338086	0.325879326588646	0.0134189273429322	0.0988410002604132	0.431270683382244	0.0303665079916246	0.617882943034743	0.29820980500618	0.402895225164008	1.00507810749747	0.563844962947178	0.0348482089851005	0.00854883622859817	0.0183552381266268	0.0325223288385023	0.12173840346725	0.129656845336694	0.0993035422259964	1.87805179858414
2008221	18	4.73702018655623	0.564445062037255	0.0255264406574008	0.112494042669369	0.553782266323966	0.0386430079448442	0.511866793955685	0.355098168489215	0.680207334402949	2.13827785805711	0.481008874767695	0.0273410365675267	0.0086474640804895	0.0298382604093789	0.0315497303213828	0.132088587718206	0.177612419449551	0.160293283544338	1.73323011577948
2008221	19	4.41533894163774	0.419365866380199	0.0381370428861447	0.0728507504614263	0.645323231925641	0.0367308900171948	0.502649565083501	0.411982538892977	0.975182044460343	2.60529650501992	0.381964001082906	0.0126777145942007	0.00871417439170537	0.0443419901613031	0.0301021964283654	0.160148464943961	0.250405893277954	0.199701678591998	1.73121864322944
2008221	20	4.1883075457986	0.620224661119841	0.0428717914683954	0.0870975387592312	0.636655445794861	0.100916027426926	0.73900142485804	0.401674671377413	1.22044919334691	2.35332859138046	0.338763937882182	0.0114851766527105	0.00908774185362103	0.0589370011364296	0.0242587803685236	0.158766066122496	0.248092907764177	0.202032401868364	1.7679193467819
2008221	21	3.89620821768937	1.27885764777362	0.042750947572107	0.158425004836805	0.652298803255371	0.216834756098007	1.46379575871593	0.391165202876734	1.2382787015556	2.08732568950908	0.336725585565118	0.0466969250194058	0.0103490961932734	0.0729270302607603	0.0119582148084861	0.106192515067426	0.23829146575529	0.21158760259002	1.82147418380886
2008221	22	3.64473770906457	1.7215965680355	0.0393692246634083	0.215940914810225	0.651917664533616	0.282269016279985	1.67905997179693	0.593224898406588	1.10247499634903	1.80547971478086	0.313730608361564	0.102433118931932	0.0131869288238909	0.07440305246964	0.00939450897646599	0.0483377552191077	0.297507540998496	0.250956963323309	1.79776984587043
2008221	23	3.6369036035964	1.75601045072095	0.0396648774960524	0.244229807967919	0.570081587875983	0.283835351456667	1.58187928690188	1.55347363308653	1.02419384659367	1.4791924617048	0.311779682564603	0.167954359266334	0.0165652545737128	0.0723088056920541	0.00429700847511098	0.0192392314162992	0.297755210577018	0.273398058260894	1.68299427146942
2008222	0	3.69895745680604	1.75710068866643	0.046040782692604	0.272314290185721	0.529432441561699	0.382725195741247	1.41059504452893	1.52311282352193	0.88052701392044	1.20310054268476	0.217119181766922	0.252321249449637	0.0192426243074078	0.0700309113890357	0.00372060408976036	0.00734183293724071	0.346585543415456	0.272697630816296	1.54988726168962
2008222	1	3.49107684436983	1.80874537783371	0.0572217321003756	0.321287060321498	0.605134434233988	0.642463317733217	1.04634077084445	1.34624542992302	0.916583123749753	0.955128561462898	0.167719082019457	0.280865632530147	0.0218417410878128	0.0702663275693972	0.0186593001003585	0.00840763098061452	0.328480548111129	0.216052070397535	1.42741167410229
2008222	2	3.46957540721631	1.77621135454409	0.0755597542275994	0.459635198723787	0.886863257549563	0.71939195259622	0.64159810113964	1.35062989547001	1.08458850955063	1.24494670148296	0.320457804968356	0.306988009403435	0.0247699523666302	0.0785030023790532	0.0864687908421912	0.0911446112567799	0.264203731306942	0.170733337527962	1.25049228861678
2008222	3	3.28986652712982	1.7257234009825	0.0806344760192325	0.815343732826691	1.03543576109354	0.870498107390565	0.492993506599107	1.34398079333563	1.1852522158422	1.46391701714384	0.361759949921065	0.30070617558143	0.0269115207392318	0.086143988902244	0.129164413987966	0.157839509546112	0.270014767788085	0.157898944987063	1.11871723357103
2008222	4	3.14473441258881	1.69403061099844	0.068878795413497	0.960918741035954	1.09661408962509	0.90716486914653	0.461324626777359	1.07544757709369	1.19184613022427	1.59056049834567	0.300202229188474	0.257840290723911	0.0284527905463895	0.0905474410395923	0.129417207057706	0.111802203157266	0.268348768184033	0.164839423194498	0.961560146310678
2008222	5	2.97582264406902	1.61658067263856	0.0610256919086348	0.896297648987142	1.09554023657715	0.88920797890853	0.677222814390253	0.879526743104995	1.10648555450251	1.68129883552856	0.314375200042595	0.239499995302016	0.0294786389442411	0.0962384514830664	0.0956788460487644	0.0758319163088262	0.253546014659501	0.194704144100701	0.763568059349858
2008222	6	2.86212637465547	1.43162930786121	0.102331656004131	0.853850509240341	0.917002502014199	0.940530918945851	1.01007045222347	0.906392855091441	0.900403821699949	1.66313438126002	0.298441079863023	0.231348243149104	0.0295031256912136	0.105853247443722	0.0395073766429728	0.0503426707841522	0.261111539543079	0.26259142578189	0.504431582142021
2008222	7	2.96767109885485	1.22697704600119	0.140306082496279	0.810170160961455	0.630020180063257	0.927817176988523	1.1783072712591	1.02121795964759	0.650383563310126	1.73322783280364	0.281247398633751	0.305274280842216	0.0297347991027668	0.103391977877469	0.013750070144782	0.101085324009371	0.263459648804812	0.329241929178716	0.236397705267263
2008222	8	3.06919720581979	1.12800060695469	0.138991179969197	0.871668316751465	0.568202218138849	0.932823937596287	1.25064503421106	1.00634853821845	0.384967490186648	1.78289122448961	0.288829816385266	0.357621605023562	0.0366218585613919	0.100835794516528	0.0156930583011179	0.184597167561658	0.263523810793688	0.395801289722892	0.0750666816719109
2008222	9	3.11512747706632	1.03629070580127	0.127325901061694	0.913715850097801	0.702208892931372	0.939590572740474	1.24539513142155	1.02518600145672	0.289242278468636	1.69907199446332	0.321392040089926	0.335591498513145	0.0620606790215797	0.0965082696487288	0.0295443881970067	0.268791936952923	0.234559564939429	0.469185292198925	0.0343309624778569
2008222	10	3.16118744315199	0.90839657141673	0.109913998331758	0.933667279091734	0.744323629554968	0.909426633204263	1.1682736131028	1.10148289782541	0.31138180338489	1.66112471993509	0.36495800127343	0.267328573260177	0.107376385512616	0.0927460154470735	0.0691872302866886	0.313332596739611	0.217722395041594	0.409243422526358	0.0286312082988253
2008222	11	3.28800634195306	0.793787244534956	0.0954222548784549	0.973972242630571	0.718812922438846	0.869274729205652	1.1358610336712	1.21125060039665	0.618882881129237	1.58790626226572	0.378059161424968	0.183240509567838	0.131896810038896	0.0887721464027797	0.0900852392237796	0.314932591822528	0.252008677109273	0.26807242875247	0.0305996390640498
2008222	12	3.22548769684414	0.654769296660799	0.0877372247116942	1.04775361924976	0.795802274571524	0.704673996015063	1.04376990846109	1.36910757843472	0.870420615558755	1.47104594174219	0.358217426394839	0.117929464439717	0.123615741876712	0.0844490988166221	0.098054403710129	0.293301173578513	0.411380391768783	0.334508261134896	0.0664510613115794
2008222	13	3.12495252871539	0.556572397159131	0.0804185537808604	1.01356105905449	0.947041398394232	0.530049176727654	0.954996145886793	1.53619755334493	0.987614519548104	1.26560119184961	0.340255980372941	0.036147414782894	0.109108516520883	0.0802120018513972	0.118862055202787	0.271748535148685	0.635480022625614	0.539894216063307	0.0925223496787761
2008222	14	2.55832049940164	0.581917998102036	0.0777521614870473	0.887319179148644	1.16490551497557	0.439146654879597	0.895577648339639	1.6799069333264	0.996323834807767	1.06859338917153	0.320384833424206	0.000818151026831315	0.0945195495749237	0.075902529465766	0.147499130921831	0.258136988784008	0.773946312884257	0.69364403327825	0.0935435484564378
2008222	15	1.27562726388215	0.559788757175691	0.0740318975063588	0.770486194303704	1.37178801537965	0.379614141414504	0.749567593389881	1.88061978722107	0.886843393606472	1.26008281572275	0.28152161987968	2.80160330476724e-05	0.0803121027281607	0.0722851151323	0.159633253757784	0.295002900290984	0.84490986876105	0.715780892002046	0.0781548703479556
2008222	16	1.05294716411661	0.496409704168993	0.0699696535150946	0.648296836007685	1.60434460274067	0.361345768706634	0.661092534494163	2.03076483817416	0.835418455254094	2.18427455595191	0.233848578418944	3.59124584992864e-05	0.0657931563065702	0.0698241206865918	0.172870707113288	0.336058205122329	0.807087283145054	0.715395853992248	0.0450787703216984
2008222	17	1.48818200936314	0.455244552136751	0.0643698803000816	0.54444271015194	1.74441040545827	0.376179000380779	0.945447393152325	1.97469743271967	0.769023602945772	2.0239309180326	0.18635722810972	0.000922368611854978	0.0552100225066872	0.0684453527621972	0.152315745489889	0.388124005362448	0.787818138364884	0.798794119155617	0.0261153236516975
2008222	18	1.6844950217324	0.444817277799591	0.0616387056234909	0.439859821529232	1.76741523739484	0.398576887691632	1.53940673676077	1.68606731815767	0.68362688070455	1.20092480486644	0.14740573959322	0.00547496259817906	0.0547062712032255	0.0681454639928246	0.124330522532722	0.448894084417996	0.770234197634985	0.853343920113909	0.0198455067039758
2008222	19	1.4751672738196	0.46346438658862	0.0663591866823835	0.383248587649557	1.70316032104913	0.400190381480325	1.3409501844185	1.02674693853458	0.629862867628221	0.688813593965965	0.115370680948233	0.00956944411988749	0.0571424858698951	0.0683633080395013	0.141928680790457	0.456229992617563	0.707980826315515	0.855960496048545	0.017816108464249
2008222	20	1.34711319621536	0.474120449751735	0.0728341504807233	0.44735189502662	1.56903594480848	0.411890111878219	0.781343555529459	0.904531807486702	0.737810210871399	0.735678913582114	0.084489244792161	0.0129362488456307	0.0649957973335211	0.0693866201674419	0.168264315801529	0.444461187753435	0.673482682999439	0.808022871951614	0.017664741379235
2008222	21	1.07330469633977	0.437939276853984	0.0727633369946099	0.50080654669726	1.23495259156156	0.435553617146263	0.669380390505566	1.00221181536204	1.51502496771182	1.25001942640251	0.0516953701643148	0.0138644524997296	0.11548014802868	0.07185915394271	0.16599236987634	0.434421440826348	0.671733404126189	0.796223184398969	0.0187211463438674
2008222	22	0.879908442349541	0.332562324258623	0.0655319754722742	0.4869785568023	0.928760587153558	0.439167180969804	1.11999559152161	0.950454492359317	1.47258423499681	1.08894153040288	0.0382011921994705	0.0126951433214284	0.312737096570154	0.078423596116151	0.150894189587182	0.421910696104891	0.672886199353581	1.23050508826873	0.0194615270865697
2008222	23	0.771551611330527	0.228767228226087	0.0522961667753581	0.461849380051155	0.828176180737715	0.432660945142666	1.14787353327878	0.389408062565569	0.796646174101059	1.12784345682567	0.0354065167900532	0.011033705752749	0.370244892164252	0.0834815464006735	0.151782553767639	0.404490228363145	0.705346379228416	1.75613233756564	0.0209837630134525
2008223	0	0.574319235569283	0.144176221406739	0.0390805847647562	0.443507117355612	0.649398338923159	0.405770845374659	0.98653797257649	0.204756115478796	0.678800380638203	0.375695028806854	0.034069845946206	0.00881957673561463	0.338941428756056	0.0837017907529649	0.157651912244736	0.387605102924062	0.726242467567255	1.27370368068278	0.0239117709943354
2008223	1	0.68249255579156	0.101758663180498	0.0289878567873823	0.439111901932066	0.505693127912627	0.376308148863728	0.610891045892925	0.134417956377193	1.00578181090785	0.100988474145238	0.0304094437307261	0.00946112580246859	0.29080675043294	0.0792101989450034	0.160963594628215	0.374076076356942	0.759894014860571	0.669625521784031	0.0259748685852334
2008223	2	1.07620232448811	0.103481268017093	0.0230010483704206	0.427684850655679	0.419175213477639	0.374116855575701	0.224899679028544	0.133175267647269	1.22540034009064	0.0946897706342697	0.0269699435175876	0.012241854369072	0.168465360818827	0.074260360268234	0.157719794396671	0.364758864389837	0.871068420502571	0.759899967906313	0.0259291118261098
2008223	3	2.02915353808102	0.152235066725341	0.0217375930281513	0.339614103340421	0.339412299982105	0.402836536185505	0.0712195479826563	0.172269575419181	0.504038414303503	0.089852651849785	0.0217422862462224	0.00851674244245492	0.0681913531000551	0.0643139341052852	0.150351487731691	0.359433452981815	1.15930787971945	1.0833305461935	0.025793061934346
2008223	4	1.85348488918842	0.194982968644621	0.018880303179008	0.239467367300102	0.254070275477105	0.426400051031858	0.0218887821511075	0.200905393157724	0.267450348106532	0.0276020143472171	0.0187678584446264	0.00456928017255395	0.0103882989504114	0.0539863212579234	0.136934323668859	0.369835977900858	1.23215320580959	0.510757016306689	0.0277966629448941
2008223	5	1.68191945132087	0.197907998365295	0.0191326389084563	0.201491246274785	0.135437760890128	0.411215488768667	0.020866254117243	0.216797675881906	0.259960461211078	0.159334539686771	0.0170327044543329	0.0076899741956537	0.000605714446554279	0.0449441856817121	0.109016857137311	0.379394395439734	1.01508542938077	0.228919052827002	0.0340748793230396
2008223	6	1.28447019234464	0.160705038938201	0.0191176986561729	0.182037425052225	0.0947697238237302	0.365030382103834	0.0783703232963989	0.204011663617146	0.235348175693474	1.4123427386179	0.0158133439732953	0.0200605620429787	0.000414664657380516	0.0379269613134492	0.087352906654338	0.454466924098948	0.791905407518983	0.20033564324222	0.0354474228843705
2008223	7	0.296290998527529	0.143149196257363	0.0179452476909165	0.189607144653838	0.100471750756146	0.31024199168398	0.432379255324929	0.180462124032579	0.201344073957795	1.75168823056253	0.0136752841330992	0.0385197633678038	0.000610212775123783	0.0386399821159587	0.0822920090243036	0.445561320271302	0.486777497421215	0.382280262890669	0.0598901233612946
2008223	8	1.38888086879571	0.148489029627847	0.0187885419089088	0.208260410152625	0.120306072465657	0.243374659803318	0.727674278973413	0.220835971120403	0.507356833349767	2.13015033231172	0.0114671929830763	0.0464592006387569	0.000488165221112101	0.0417442742480508	0.101670218053317	0.423112171416332	0.357131209210435	0.34549193244768	0.271433474162745
2008223	9	2.11881242349579	0.163220070241354	0.0377936353350348	0.206303243377595	0.142090227793111	0.165190754017269	0.974127050806611	0.201791546472137	0.873197015442723	1.85885090597067	0.00996001677952599	0.0442551677262375	0.000345246740645029	0.0470409476746752	0.180940150201505	0.388154349467643	0.337777527811332	0.475148717794423	0.506660950858127
2008223	10	1.46241781080673	0.159080684626171	0.0577604075530752	0.192405049335283	0.143490525169552	0.122852855986222	0.925239953883977	0.166849045420607	1.10765845703145	1.47012257709148	0.0101635834820741	0.0375230679764812	0.00191673559031916	0.0553603330650026	0.223158340845031	0.361803377694889	0.329151551243267	0.889826818308622	0.257203193052022
2008223	11	1.16982546787376	0.142329668037242	0.059980921638935	0.177067547049893	0.130453881596527	0.102591326834833	0.790839302302204	0.160009577025087	1.0414622483705	1.23409150605698	0.0178989245163605	0.0263781530096412	0.00597709548307676	0.0670213567292749	0.231417048155105	0.315106384274924	0.310363819006601	0.776464888026006	0.0473171414210982
2008223	12	1.17173381427072	0.128254130174481	0.0578040942251195	0.158139773705684	0.126195249200926	0.0865992388065823	0.559384610575649	0.163136995277838	0.874088014631042	0.417317468640052	0.041465860982405	0.0154072824357438	0.00646787607234553	0.0314202222302016	0.223279944498822	0.245328462049909	0.256148618721398	1.18140096108812	0.0126731453195086
2008223	13	1.01352319758503	0.0942048214003332	0.0569100305004592	0.144474354028676	0.118342500536974	0.0813113463650589	0.0888352850597005	0.141947597027301	0.969424168649826	0.268324893295814	0.0802457724518896	0.0144096308786162	0.00686860556256452	0.0246927464277331	0.215003588478654	0.200731846456919	0.204233687024511	1.19113256211216	0.0286310761032535
2008223	14	1.16457307669569	0.065735817491541	0.057900627250374	0.136278640089767	0.097322946914036	0.0784478597037683	0.00693757871343072	0.159946970616511	0.937138493961399	0.787242830662326	0.139175805663182	0.0208155917683179	0.0144610268542433	0.0142045524181431	0.20670136254275	0.178382390198604	0.147278913451603	1.02566706198306	0.0549513164071975
2008223	15	1.17802998780237	0.0496892221412009	0.0582154273059127	0.118150304936136	0.0910712067647418	0.0760388908349371	0.0413859583341373	0.224332540299033	0.730739803902582	1.19612584626478	0.167244865421866	0.0203224147451514	0.0449635458057546	0.00289490063651173	0.20198702107435	0.168513758403644	0.119762483123629	0.681047184882695	0.275620545762614
2008223	16	1.03956141205312	0.0441181521524131	0.0588227091791604	0.100897057849584	0.109217828187106	0.0746982961712025	0.660937052892686	0.295232857775214	0.242011480646818	1.16688656345181	0.221853555046317	0.0115365843370571	0.1042834036506	0.00109640614964134	0.200273405976028	0.165795039995836	0.11369266967789	0.212628144393572	0.476890818023094
2008223	17	0.791592552918081	0.0407823263898255	0.0583292035618994	0.0967116076733516	0.134470320767497	0.0746568017092721	0.766463552463788	0.448176518937728	0.221340084772932	1.15656119457305	0.373410129698705	0.00297123356135569	0.247721148318644	0.000889807483948587	0.197441888788392	0.166334293064901	0.12250852688462	0.120936083614279	0.458013152701106
2008223	18	0.813749032195873	0.0434518812931983	0.0563974106663227	0.0918324858000698	0.0971627874658907	0.0740306506170487	0.754324247255654	0.430955884354222	0.56071586160006	1.05987347837207	0.492982899351103	0.0036986868697975	0.361789069502488	0.000987653211418838	0.192348059135159	0.166186845257052	0.136726980255238	0.340145732749785	0.427240682917501
2008223	19	0.91433886859017	0.0498893674332692	0.0522303695926178	0.0801971100328962	0.0823869553099297	0.0708250261252401	0.735640880832656	0.358488585379679	0.717852081805492	0.975794054935212	0.546018372611433	0.0288651180889359	0.440829760934434	0.00111834278244684	0.183261527786149	0.164078514722933	0.128050352266466	0.800822203035914	0.474090940326665
2008223	20	1.13209516046491	0.0605595413557767	0.0477418686309592	0.0568970202912423	0.0998606522409881	0.0656056087837964	0.750368400358144	0.371375108900834	0.734464664006018	1.04228640818765	0.589371148314947	0.118822104239534	0.507517621239899	0.00103273639619186	0.173406508126719	0.161786565277823	0.121266181784092	0.794153428651682	0.663809386239601
2008223	21	1.35897480402065	0.0838406010916443	0.0434436031171878	0.0471482133693446	0.226851874925471	0.0569743869524319	0.846563186222793	0.397189775199528	0.651238267638798	1.17706857687067	0.58394905796021	0.197593743620255	0.698986616743136	0.000871103330462173	0.16575232069246	0.159867200835606	0.122059398201345	0.823108426533327	0.892738025366719
2008223	22	1.51618536720196	0.260421438993614	0.0397713747474463	0.0486032883368222	0.294803242552491	0.0472460540081868	0.899391886841361	0.407013857329908	0.570993708946585	0.966574695569544	0.40499234670526	0.224553333341389	0.77842456222111	0.000603519741042	0.151987668923196	0.157906200961928	0.116556908974197	0.813798406795258	0.97790545844358
2008223	23	1.59942406760859	0.34944739386316	0.0366387708077519	0.0475016790769933	0.237231100507042	0.0423843293194751	0.880749475033791	0.374391077537707	0.686871210213243	0.904781541843958	0.427536006281157	0.246675868005976	0.718148461286653	0.000423883621372467	0.150336776106614	0.156295240394251	0.110409732983753	0.787148974946737	0.931088824973197
2008224	0	1.44071899745856	0.34915825631811	0.0342982968640144	0.0426319080932328	0.232896328081839	0.0413047112190212	0.928202338229132	0.325262139116781	0.717627325168686	1.02701147620181	0.743903041597325	0.33728615505974	0.712002783906736	0.000518903896284777	0.134718623790354	0.153521367237725	0.107940593681601	0.800153119871326	0.835185950614055
2008224	1	1.20729195351025	0.29258970218565	0.033174883631268	0.0514665933535903	0.238238990112705	0.0403726249497602	0.92677602278291	0.330432365249736	0.687002946421151	0.811479658479997	0.657972763226996	0.537411094679753	0.69173786124185	0.00125064664212721	0.12454320578649	0.149627820211165	0.0943663564259096	0.876550628390017	0.646732395810577
2008224	2	1.07719562844531	0.247613249209599	0.0325904458033085	0.144582517121753	0.237468714277876	0.0390998421097719	0.723946342969138	0.332888295447286	0.775745874483249	1.09484083293319	0.143308230547191	0.663320860698612	0.425246292794547	0.00191874431460471	0.105917166564895	0.144527615795816	0.0891421153013842	0.877093627486982	0.478277150712753
2008224	3	1.38962338757112	0.215395369149765	0.0309989057323289	0.277061624175984	0.22409926057567	0.0374724367820994	0.609516304170823	0.343613460853801	0.920430058463357	1.30900766270709	0.23468110356136	0.637500877539802	0.304993846757869	0.00270312661839934	0.0914474771722419	0.137754129439916	0.0872164942164523	0.822160700674719	0.427148048428637
2008224	4	1.49245717089507	0.212914578292351	0.0291063567446592	0.27283117199436	0.222715506862453	0.0340208995129686	0.763146018231129	0.383909633005793	0.832507964127274	1.30025465720826	0.379936847490722	0.662308288457164	0.391456508597779	0.00987718139849866	0.0816140486292843	0.131801322746799	0.0906542604327678	0.87152764717053	0.464224952246825
2008224	5	1.58752717092067	0.24359913765844	0.0270770018754051	0.249822262923436	0.221002701094012	0.0272683523451259	0.930002314695273	0.500864068202899	0.792711859376894	1.44847357611599	0.257325360477898	0.674175532769446	0.317132456614266	0.0877447892836839	0.0833762217514375	0.124585585863254	0.0718948871629305	0.779322002744563	0.44467004135756
2008224	6	1.45831424185922	0.282147417136458	0.0246309077346624	0.237911024656622	0.21629043556668	0.0242674694167732	0.996766883725753	0.509516333260349	0.766917563828949	1.56741430967813	0.439976960647536	0.638426659425819	0.488678420706079	0.241866506020352	0.0947241066409486	0.116553531479803	0.0312345307884262	0.802409228652675	0.408541817133758
2008224	7	1.28088145611592	0.3706107899343	0.0350941916975289	0.21697113381785	0.251392028556194	0.0237657818827504	1.06836110667652	0.483054935303722	0.881051027421183	1.58273891592895	0.567815240065193	0.548711031939567	0.703014559084379	0.368858234373636	0.0999604669528312	0.0934626912555232	0.0444678397447013	0.982625527627563	0.459226337981328
2008224	8	1.4008815745893	0.548070737073769	0.038375656644809	0.210696033487668	0.366119040212511	0.0380504432543632	1.17422271410885	0.452848659996628	0.949257586220776	1.32430803931183	0.586865968287192	0.431224293586141	0.521992147323113	0.37597070841681	0.0996891419837971	0.0599129289537596	0.113602118974247	1.06625228425596	0.525439316100176
2008224	9	1.60994385206265	0.59738306206292	0.0354299656528048	0.220055394421654	0.431925829971267	0.0750120100393782	1.09242283867065	0.490716212050623	0.975680942685527	1.31515701180557	0.594639337334164	0.362231294928651	0.200385018771269	0.342395529444356	0.0952195852746546	0.0438941440937554	0.15872700542507	1.16065265208463	0.575429219972942
2008224	10	1.57410269726944	0.535804908990084	0.0324673170810356	0.233072415291234	0.420182285959738	0.0891897630945361	0.881231631475623	0.765265884312987	1.00866009515083	1.25030003339253	0.601332995505587	0.24427256307462	0.291343782611312	0.318614327928089	0.0947744846838087	0.0360570538169077	0.160969842964738	1.20208949662118	0.642094427527066
2008224	11	1.48715059329905	0.477497919164077	0.0515720640143369	0.260209246168424	0.368101703835199	0.110100322618339	0.870425415162063	0.759158844394752	1.03076164794184	0.976758218681862	0.517946608625555	0.262199831385053	0.410269714800957	0.304816401754058	0.0979119781794245	0.0286623608638275	0.170298278521092	1.17353055142828	0.535143128737039
2008224	12	1.17324544805778	0.423993756986497	0.0523234970513309	0.308011748679962	0.273494329548447	0.115307218101213	0.775766840945836	0.637647417259173	0.894574480535962	0.719103589725892	0.434162275623808	0.268719659110845	0.416719076426595	0.27653423709046	0.104329680464489	0.0243644956793192	0.203320477313966	1.14059300916156	0.370188292998991
2008224	13	1.14707180153371	0.371522396071639	0.0448791654004881	0.350998568344211	0.224296298832784	0.119243528428259	0.518920906778821	0.469562353042657	0.781498498193854	0.822176888341653	0.422994112329013	0.277222321212232	0.350300391934154	0.240963636861855	0.111957731874719	0.0211328587891083	0.242362287393544	1.04771378682578	0.324045359551566
2008224	14	1.39799368272306	0.329960255606464	0.0399861339588091	0.36266923798685	0.194640024294985	0.130117059394789	0.396938722623143	0.319006660715297	0.774240396135752	0.998172854598358	0.513811208274419	0.290451347054243	0.279852763450411	0.199705903730651	0.110006064361632	0.0193343128292131	0.258212276799189	0.8276991740173	0.417417944461796
2008224	15	1.45529066753952	0.31558461564067	0.0389078387203919	0.358945249117174	0.161310080786016	0.14811386055719	0.36909653904143	0.221862276142152	0.74838972835383	1.16258458158926	0.611587981414808	0.247386305265549	0.273115845005487	0.157999114229984	0.105040010539011	0.019292857116344	0.253522043212891	0.629768535704556	0.531215178917192
2008224	16	1.37019347792995	0.331861604449418	0.0382753628859263	0.368035777013933	0.140558792408182	0.164624201636198	0.478144422641951	0.161185088468509	0.493869897620004	1.1268668575224	0.64792607772412	0.155064205025952	0.30978053661917	0.13551418558748	0.101704599572454	0.0197822140013703	0.236390894194758	0.43669533038446	0.612687129460775
2008224	17	1.27056751560191	0.35870349419409	0.0364994042470546	0.379996473814202	0.140501968234545	0.179995809228133	0.541960763292305	0.123552642404206	0.380070875237541	1.11515692861799	0.604488356987483	0.134647933846513	0.28905907411507	0.130715853810903	0.0994084281579774	0.0202202227158074	0.216940280090306	0.442525430533459	0.65750083144591
2008224	18	1.20509362804645	0.388178599780509	0.0343901540029162	0.38638708885774	0.115432301010154	0.190119344021196	0.563173330703838	0.0936952736096301	0.378436563762982	1.08604412171442	0.535006961178949	0.176653044285088	0.287130094313074	0.121035983804795	0.0944392609703336	0.0195310066420155	0.203424820062038	0.50417650279641	0.664477363493459
2008224	19	1.16541834581039	0.396366390369977	0.031441630062861	0.388790353895763	0.0976290829361242	0.175988745604091	0.63937402610375	0.0691981983769663	0.422822012163792	1.11719465345166	0.441753412137628	0.239993316655105	0.324822669704232	0.100776275288414	0.0868555551183589	0.0174678986381787	0.190998484057538	0.586667447768853	0.630841873319915
2008224	20	1.14943420575748	0.394878093966755	0.02815757612457	0.38121027221566	0.0895326105616955	0.151009075161207	0.754619414868668	0.0512518156366639	0.493415217194663	1.16193083081126	0.410119356850059	0.272546679877178	0.454558413855019	0.075942416355681	0.0777970713166284	0.0144431661069139	0.176513543136385	0.712204246968259	0.658278384065278
2008224	21	1.16042490264349	0.392438519396305	0.0251961195399223	0.371300937220485	0.0869513445296909	0.116133212776942	0.873706671506968	0.0487331494640072	0.57779664362333	1.17745948515201	0.428389876234545	0.293182277725927	0.569630471513404	0.0543104823117719	0.0696903192549633	0.0129246321416787	0.164858284895201	0.750755830892071	0.680959473739994
2008224	22	1.16907938709906	0.390744885717022	0.0224484870800218	0.362996100083948	0.101442446842718	0.100173090496049	0.95623571738651	0.0649368425576063	0.685719778243164	1.16255618797409	0.493353896853804	0.298727912209119	0.701134216205437	0.0391429815814253	0.074037323916017	0.013142149547428	0.16034154343876	0.761246083573186	0.710184545717548
2008224	23	1.1377590952007	0.383463879560792	0.0216766031222929	0.358863329186103	0.151272726408862	0.0894623253121559	1.00503170072902	0.137739596014783	0.772777966127739	1.15532370499564	0.505463864917958	0.313803564890232	0.806268229552333	0.035153203397016	0.0672279493218881	0.0133870022873132	0.160259175997272	0.797758955414592	0.737705701199242
2008225	0	1.06653245537326	0.347126113314068	0.0194665444864123	0.364795304042856	0.213931679707888	0.0555154518824932	1.01733288186368	0.213285258417842	0.802049382164247	1.16436123654086	0.430713580138578	0.321231847977488	0.906290861515276	0.0353772858859495	0.0605391449982881	0.0141330917730142	0.174850068640513	0.841569064863353	0.737426462397459
2008225	1	0.948136776539297	0.308096234776637	0.0171041982106841	0.365237312730894	0.262780149684264	0.0382740258493203	0.999958625008072	0.245486930860497	0.780967273768082	1.18251176120338	0.440730242675748	0.331756405554604	0.949987765268142	0.0392010209271516	0.0562403241781873	0.0166606143331421	0.179903803187062	0.879978312927347	0.679961036855778
2008225	2	0.715980375570487	0.26300523149438	0.0141456842021544	0.329588961820516	0.298038546644969	0.0272845027693387	0.981827355266111	0.251465138168103	0.722110420692876	1.1747084228404	0.394156096088046	0.352329079515348	0.955109066457557	0.0497983765503395	0.050534485546666	0.0279977087292424	0.180966955589022	0.889432184702691	0.535379764008482
2008225	3	0.390002376473263	0.225659110614068	0.0114224109731612	0.213893463353967	0.308656084150234	0.0182662534479295	0.911145155502011	0.252818855695907	0.637146658995139	1.13939475342059	0.378342360648387	0.390931744448006	0.957726024474315	0.0663567277967416	0.0450063269849229	0.0558221340368402	0.176688224326492	0.880461548393591	0.449979504074021
2008225	4	0.274603720169952	0.200614262300897	0.0100821371789864	0.111252348036943	0.325665276989691	0.0169173494941984	0.813624563809975	0.271345880956469	0.521093597938267	1.07896795867073	0.364506895643395	0.414065839250386	0.957484439905333	0.090863611769084	0.0408038653314889	0.0953397197245098	0.155321238242303	0.843263667051499	0.404266626423642
2008225	5	0.271115917796025	0.158875468395739	0.00998710734016862	0.0789265687671124	0.308490307536533	0.0198288353769535	0.635491507743069	0.307805057089285	0.284973196517217	0.993496448950247	0.368806667813935	0.380621301110246	0.95551575133039	0.131643710903682	0.0334974691364078	0.098437286876739	0.126330353760735	0.757276013039082	0.214088701714685
2008225	6	0.30965071061874	0.0808182081140793	0.0153351027161557	0.0534458884240123	0.282170725602092	0.0187670032709313	0.371412180630258	0.314478315882715	0.144227582262727	0.840195494433877	0.391586958869065	0.325360182942875	0.940067769438567	0.188939557830704	0.0251704958138288	0.0768226870829356	0.0801036462867811	0.603604463776961	0.0535389400218325
2008225	7	0.308297969442588	0.0435446696942803	0.0472356387269321	0.0229772777217409	0.225107987313283	0.016727700952293	0.264238238775552	0.288719106153303	0.131335447355559	0.57432997017141	0.434166658630593	0.284114244399304	1.01852528444466	0.245259604444173	0.0219513711029206	0.0537494770118821	0.0189237391624876	0.222722173899962	0.0221255015233766
2008225	8	0.254864985299136	0.0318093230827891	0.0455313006711481	0.0172954230539516	0.159216729912512	0.014804028550239	0.275911585178293	0.227971564802676	0.161224903847804	0.287503412572254	0.475915055251732	0.273993447580291	1.25010571289741	0.314563586565342	0.0360059094051399	0.0432278803976298	0.00168237439053668	0.127646381752694	0.0101257963298796
2008225	9	0.241800198190327	0.0234755357906368	0.0321885603652054	0.0209190506839498	0.133199214200004	0.0140996839702427	0.245170138905071	0.146499353559492	0.231963987067545	0.27617649179983	0.475031989779711	0.252262181485326	1.08337476856027	0.36744103091736	0.0457753410184574	0.0399909435936561	0.00170632663432542	0.142747367513523	0.000383059697248731
2008225	10	0.236934146092535	0.0210410908711621	0.0519942453747851	0.0225307081728017	0.0865113552315972	0.0140193782806779	0.247907389336428	0.0696607115058057	0.255938515949226	0.13077206682494	0.4245974835018	0.227518427635097	0.903035634860925	0.422467096287699	0.049432087485699	0.0373481894899209	0.00488536025454272	0.197459099145137	0.0118772956398261
2008225	11	0.205107911891293	0.0204014694258259	0.0853259718839708	0.0196237250212335	0.0308002311999813	0.018602287861411	0.238577975778055	0.0371135335582635	0.244350485115986	0.0702195071480295	0.360363302575943	0.206756221015132	0.855021257325457	0.430810706898393	0.0484889410010638	0.0310102791130034	0.0185281361762748	0.216933271882243	0.168104097923816
2008225	12	0.172366706799315	0.0157111531565666	0.043576061817859	0.0274686651180878	0.0181988932832547	0.0188995932891436	0.152259413294652	0.0485392157444672	0.266525693299676	0.0205325839797619	0.299820710571803	0.191155583181011	0.765707994732429	0.435727605754217	0.0459125236022176	0.0299610764257462	0.0307284797287007	0.192141696017383	0.155750487366905
2008225	13	0.137133422333445	0.0198771423292898	0.0182296807821477	0.0241864144705624	0.0154680311934984	0.0310193384712986	0.0468267232520444	0.0693620237313679	0.286783503719528	0.00254489816993194	0.237810064314694	0.181004128049122	0.456159610033273	0.420107806401129	0.0436751938763284	0.0328088758488964	0.0578232266495685	0.162407213515366	0.341558630394416
2008225	14	0.0570369878956359	0.00938595470515526	0.00238416838019064	0.014322610950219	0.0225464043823568	0.0515387739629051	0.0467710763670972	0.0475146897786263	0.265274252719932	0.0360278336674559	0.200312269806881	0.177384251864088	0.167480725742796	0.41520024963916	0.0414805176478291	0.0297455618301151	0.0546140356402939	0.172344960062225	0.517582047912122
2008225	15	0.0808659051963259	0.00461524219838813	0.000907565462171302	0.0269080835250038	0.0184285828442987	0.0564067938166739	0.0704098076325788	0.0240556079904637	0.248231225633927	0.0820900098920049	0.198707258140888	0.178492153599702	0.168289632943576	0.434299223949621	0.0389336980237535	0.0263117506532989	0.0487031828060059	0.173098576108415	0.614999089175209
2008225	16	0.321554279979023	0.00544232393586946	0.00175927244265786	0.0430721529183956	0.0148402121343825	0.0529735913948189	0.070992013805148	0.0168118821199457	0.214859053197431	0.0590265574241477	0.224151970235159	0.194390832952156	0.245066992469106	0.48083768625842	0.0359645679502919	0.0256123436573316	0.0518012966604219	0.083142086911787	0.357381441083633
2008225	17	0.97308091778002	0.0267802064258184	0.00907199570019347	0.0380560728361116	0.0178389648204435	0.0495461214183263	0.0100068797065162	0.0489181469709529	0.106890153107151	0.00500503454269915	0.248799545380395	0.201157120417076	0.226119784424297	0.491644997069213	0.0309848345929347	0.0261099959965166	0.0556305880083609	0.093212893407519	0.227857193942419
2008225	18	1.74401988441514	0.0846595176765581	0.0238368146526172	0.0576685208722417	0.0051514571580483	0.0504247969661768	0.001070677335986	0.171819679450714	0.153919306104534	0.154197723677549	0.243802360618583	0.174681857687046	0.114996750576346	0.470095207018763	0.0261978667763106	0.0264627261307462	0.0575534853135534	0.105375583467557	0.181854340171004
2008225	19	1.87669493530982	0.0828416272874235	0.0802953614887873	0.0573976991312353	0.0413930628419049	0.0381228248412713	0.300120764860368	0.159809990699111	0.153901601064535	1.05203417285798	0.235123443551634	0.133439044533288	0.0487190995338341	0.453118964121156	0.0215688987077104	0.0259331868875254	0.0578336063915456	0.0558326262852791	0.150605185524753
2008225	20	2.10017154153589	0.0509981936566664	0.128951255948465	0.0399734057234872	0.109694996410145	0.0095172686654193	0.875765888914513	0.237531858490355	0.321531780830483	1.41181888870526	0.23005769226635	0.119171162127525	0.0566208580635246	0.424566173265655	0.0183104166026518	0.0248003625739396	0.0495266792872893	0.116325680528261	0.124277608889298
2008225	21	2.31643558014727	0.0372955166507566	0.124507550540984	0.0385405835923889	0.131315384733362	0.00497787719052304	1.10160217028562	0.25848504311101	0.557373783660666	1.64291610792465	0.222500629048783	0.125411425310378	0.0955017694610504	0.367481911430576	0.0166928101630257	0.0230352879466157	0.0297144713660311	0.475743593498854	0.148554275159798
2008225	22	2.32276102849656	0.0273936451427903	0.111524165876348	0.0597079887388487	0.13947472821391	0.0104241530744337	1.17783352170118	0.282773863306296	0.906002022462641	1.67791503471359	0.224953678104974	0.155401492319426	0.103901925656042	0.296523985836848	0.0150831164245565	0.0216207446768337	0.0334358913606466	0.851269591453425	0.23689698256029
2008225	23	2.43520700659457	0.0207646100116985	0.150877092179171	0.0537557653898706	0.147042461540552	0.0287239363048639	1.23908193050787	0.271224392346331	1.04621948950546	1.70884617123281	0.224608465691818	0.174031022497669	0.0593676947606095	0.245051830916559	0.0130963395658728	0.0218020778415094	0.0532966908125353	1.15624034315143	0.271829204735998
2008226	0	2.57816748266038	0.0192361718967436	0.184601090196581	0.0374839010413956	0.149980217682598	0.0472373844347589	1.26395163422173	0.230285445741247	1.11229366582379	1.75965789842179	0.237691671613082	0.188780699511319	0.0752768015410477	0.193286729344812	0.0121577937281891	0.0193734499193849	0.0585442518972246	1.20967938589686	0.310398720446489
2008226	1	2.50435707782902	0.0221709077087589	0.218679801091449	0.0241349825527437	0.105212094084183	0.0459013623833876	1.32717093280408	0.14621161336573	1.21473384124188	1.65116553669091	0.278086316460463	0.205246952451991	0.668166940983122	0.101089677814445	0.0113650183939233	0.014806167248273	0.00930059459704319	1.28447142238079	0.33237558288407
2008226	2	2.39719174032462	0.0356190487879805	0.239544768855454	0.0205167723008443	0.0321203672766572	0.0430784736119397	1.43463757284421	0.126646084201792	1.15202291718475	1.52489704548576	0.354890497071129	0.189583910102347	1.38052673659288	0.0389155658620015	0.0105578578268281	0.00547736418509212	0.00280696853751529	1.27381009148246	0.46668116189206
2008226	3	2.20178043008999	0.0517765420128819	0.253838140066359	0.020845684028846	0.0180375453718737	0.0533497409186778	1.55725238362777	0.13189498539893	1.26048464886393	1.79203841004735	0.367796620258913	0.146468096570307	1.58988646299223	0.00340107768035245	0.0118275541856314	0.000854830522377871	0.00649547433469131	1.28297823021016	0.50314815045585
2008226	4	1.97501045922202	0.056888350914242	0.267135775688795	0.0261513134682344	0.0199420720545058	0.0716389715182761	1.59206739450724	0.151386974889004	1.17053288637995	2.06003089483263	0.338619356291192	0.0745149453665188	1.72205575104571	0.0597914014115572	0.0139328021093442	0.000224395720249831	0.0209605281516826	1.44380633018506	0.437146924293498
2008226	5	1.85996512819018	0.0662661497758479	0.289739530800732	0.0386891593948135	0.033288460782367	0.0867756398790882	1.65325754567917	0.180498000894637	1.09213603491953	1.66652693549526	0.576549811521173	0.0542219392617022	1.06102060312384	0.804284448790916	0.0138771172410915	0.000171991749666478	0.0339830631891529	1.50263599695723	0.433517915782257
2008226	6	1.9009185486793	0.110284533683379	0.35116355348376	0.050894383935346	0.0516911573239967	0.10914383600924	1.36811752250723	0.226267458342498	0.977372339130395	1.01493747860766	0.619169573125932	0.0407603713961068	0.431497227633784	0.883246242658188	0.013100445155754	0.000386921960382723	0.039372025170959	1.46309664995924	0.436852145661677
2008226	7	2.04234566474084	0.217139637828022	0.421615368593435	0.0582224721485563	0.0784114021339822	0.112164785711776	1.0827800917061	0.25365900871162	0.844018695479906	1.0366660938091	0.379006333337064	0.0338840720353135	0.254315765540885	0.822015514387389	0.0118202578997663	0.00401568642176459	0.042350244508902	1.39202768107836	0.367622054273557
2008226	8	1.99702180577306	0.289785608607024	0.462231459814376	0.0756663592683715	0.128359869160318	0.107257595519922	1.06574790324424	0.287564382508949	0.996666197939753	1.29653816625961	0.377798059173115	0.0396723623906286	0.200047424042633	0.428404550458133	0.0106875390875117	0.0143338187862065	0.0523744530883059	1.3433896453823	0.292311264333945
2008226	9	2.10217411635026	0.244764027437274	0.459624876724908	0.0811864098816527	0.146128399925563	0.0972451228244235	1.15846471676824	0.342677290653774	0.966275764054966	1.46307785984959	0.368902496338174	0.038910461821692	0.207545096811026	0.268568500305133	0.014132138982871	0.0197480320887254	0.0633712800661142	1.30158484778306	0.300559278297826
2008226	10	2.18785406650744	0.19571608967932	0.41901128061808	0.0980051215332225	0.157033795474969	0.106756872011967	1.19499831864914	0.325761786632711	0.950874640217588	1.44983574467144	0.442708063090843	0.0322004357401248	0.103703559424196	0.710854964059924	0.0248185991849929	0.0212288297250837	0.084572379180339	1.18128324647093	0.422257744587807
2008226	11	2.18573371825004	0.180650218302571	0.368800964542373	0.189045027204927	0.204921164936095	0.189443176015113	1.14815230380765	0.30663759342613	1.04216235248282	1.29506378777961	0.490617832244753	0.0437677093731328	0.260553353062922	0.64481425785951	0.0475852605255776	0.0308094968402716	0.0973251469710175	1.15627192275953	0.461172596291588
2008226	12	2.15737322592166	0.20781136859873	0.344963714581705	0.256319703197235	0.261289116547627	0.242103370394425	1.05338040516582	0.308224591801636	1.01525739419426	1.21263047554875	0.504266397892806	0.129561796042357	0.720925002866805	0.208778840599585	0.0588479020580876	0.0556169488289961	0.0883157532159125	1.32430327265653	0.310853826730254
2008226	13	1.94369783971147	0.229563898625886	0.354034545229609	0.247104533295764	0.231186194945548	0.292103642448341	1.21536873882977	0.291186272076062	0.98485360704262	1.1825635323275	0.521985157194388	0.127954169038212	1.17477123766731	0.102028202176284	0.0462060796602668	0.0759826692151545	0.0702145916550132	1.30769530018283	0.920063090533491
2008226	14	1.80937849245726	0.210328483421797	0.382746347411317	0.206681197995256	0.194836720170051	0.302702881033842	1.32287025576289	0.267508965888224	0.969041921826281	1.35059349022093	0.54445863175981	0.102642324535347	1.4317121692722	0.0565354197657728	0.0266477599568357	0.0816036477966285	0.0626613117414693	1.21269750924786	0.695378321483251
2008226	15	1.67801196577102	0.189838581148268	0.373538047544792	0.188728231300343	0.183176733188733	0.311191749489814	1.30383302242542	0.266704721469309	0.862114457223521	1.29708319761168	0.532409002123599	0.075133262316174	1.41552098653252	0.116295760890503	0.0131273657407416	0.0890693252054522	0.0646787160908424	1.24039845258761	0.381673720841685
2008226	16	1.44437757980117	0.192124770107994	0.349339489224162	0.184036928847822	0.194330646501565	0.255926564074298	1.05953992313147	0.257267203560321	0.935227891169905	1.00131072350379	0.489577127953484	0.063415861613037	0.897169502203243	0.231308135752892	0.00927808053318281	0.102585930674483	0.0727752765426944	1.3658687805629	0.858373284896961
2008226	17	1.81748016240517	0.168541420369691	0.335678946353528	0.179979951747489	0.194143203732353	0.198757563268355	0.862860881650616	0.211161418997578	1.07252532897818	1.01557510229976	0.484095947063166	0.0710058782856412	0.906073281474214	0.38366738591756	0.00644803761657131	0.113187511875126	0.15041951048596	1.47046504880845	1.24435569846777
2008226	18	2.0837606028665	0.150395825250367	0.327480665547215	0.174486800600057	0.165468735140735	0.177083928758359	0.753269580006547	0.167935307197813	1.14025341015193	0.99742824954728	0.509944218591638	0.0198166517938447	0.993499052969386	0.584076074741148	0.00755105748391395	0.118915581888614	0.311061574085726	1.40183394954782	1.17870745020897
2008226	19	2.06683892616743	0.178144095468917	0.30924208085513	0.144368824910265	0.159660939969996	0.169877592113892	0.721762913533448	0.347272685612768	1.18637761306423	0.738582386211685	0.459732276274562	0.0012000346385488	0.825057935944165	0.663071846864385	0.00983547997276684	0.125251432817687	0.334177763398733	1.23405107780873	1.19374717621419
2008226	20	1.8175568147341	0.211371805255695	0.24669670654795	0.131657564082247	0.256308040746024	0.142340991758736	0.821484372680282	0.425395756985154	1.0122436334161	0.663233705486323	0.404431237713753	0.0171515680963963	0.709384365732603	0.615582643077991	0.0111465184390058	0.136359015167762	0.302105649359758	1.12111794618069	1.16354380251613
2008226	21	1.85854099376867	0.200718175099221	0.146323335187266	0.146005250845825	0.314300412619739	0.105029271464209	0.833356932500187	0.559294323019033	1.09240258859953	0.565157336958256	0.452181589803608	0.100840498994217	0.529071280717828	0.492115281166923	0.0113199126130214	0.158218600596835	0.238253648651637	0.923038532552783	1.11604877378911
2008226	22	2.27939907869277	0.191895060322098	0.10199375986057	0.153847602901671	0.314300231074974	0.0910864771518068	0.820552026097493	0.932411441596227	1.13976429038826	0.425426469042981	0.619674582945111	0.182272686976955	0.516593459926744	0.405588266927335	0.0100398351066278	0.172649985026658	0.147548235781293	1.01322360792985	0.946150110528129
2008226	23	2.39572981796272	0.181244061991168	0.0951798665197506	0.190638850969476	0.261758829240148	0.0974204140867936	0.735139650258853	0.951311641391098	1.11271413159618	0.395673431415967	0.765215415196987	0.212203376230661	0.478118511831783	0.438319682090849	0.00787750762210156	0.173276534574937	0.124292010793263	0.933236061611432	0.619750502794527
2008227	0	1.98500037458883	0.195237928434803	0.130544712987677	0.213326909040019	0.295807398596719	0.0989535428980862	0.695320548175128	0.914401255107313	1.1656342515435	0.46813420739258	0.778870109356984	0.2387791685688	0.527248056269396	0.44162504183376	0.0073495551481465	0.170994397810248	0.155030819169932	0.90965708195533	0.757550190328835
2008227	1	1.70533991715899	0.218830614881572	0.159285374482889	0.189198836105116	0.404563675534415	0.12273519814393	0.812289300819984	0.734844339039053	1.22723414319541	0.583944936567282	0.711672715178602	0.278500043917359	0.464673836721718	0.365888747749429	0.0095418382972374	0.166130614704994	0.17157988603724	0.719926722680683	1.26239806951745
2008227	2	2.00454832436733	0.196641911545629	0.182072362835554	0.16814458277742	0.390319290480067	0.205744744820184	0.928419815835708	0.6172982106305	1.41061292125968	0.578436652169339	0.771990622162109	0.314935946239436	0.446987621659905	0.30995438855837	0.0174158384714656	0.159400156889269	0.189797471668469	0.592925998747292	1.31160213237622
2008227	3	2.67406608688366	0.235048904249796	0.179403716003257	0.151290720670764	0.379127857933048	0.22205031698719	0.906786225916938	0.552539334517262	1.49017433194184	0.624943351182559	0.807171199158602	0.343515997528109	0.414116836954556	0.294627428310875	0.0251500882258054	0.153130988517233	0.229227306852001	0.619425653052353	1.30005296705575
2008227	4	1.95983610416629	0.323493375095287	0.17119590505785	0.143322369619142	0.276326733784496	0.207665855984246	0.81574936373942	0.429649515579774	1.38605996278618	0.920457976113841	0.786168252189783	0.392515425300601	0.358626755843561	0.22566984989897	0.0290567702288988	0.147816667497312	0.220360351891663	0.701487193506369	1.25397103036048
2008227	5	0.986127015420251	0.406991228527329	0.1595894088174	0.138369034441337	0.351674678464911	0.190572244786381	0.664962010357756	0.380546742298165	1.29601661444041	1.19566576433678	0.694819099195055	0.510076894759751	0.258401885506358	0.185842928361292	0.0315009503231568	0.142620811541079	0.190143293978914	0.847057886350441	1.22398862686909
2008227	6	0.928190898416201	0.465197461118395	0.170245102862409	0.164613696845432	0.319670425527084	0.181790123112349	0.751788656054562	1.01318052059747	1.20242277541352	1.2186469416317	0.843140407897728	0.631195260149076	0.16679084957707	0.176387314736983	0.0322069469063848	0.137947188692968	0.157694751245443	0.943573637180505	1.20968448936051
2008227	7	1.01355527632166	0.467353673227275	0.377411527530524	0.21221375949134	0.295433105901508	0.185909208543307	0.99417653132818	1.21278257443289	1.11337807967771	1.2940423666494	0.928426433424478	0.614143923911112	0.118260781077139	0.221637909284986	0.0632337098126625	0.198303380959734	0.185838925618421	0.932591575490706	1.18392574867483
2008227	8	1.051968546907	0.388120752458056	0.558800674287965	0.250446705329559	0.431764502002089	0.184913817217838	1.00729167906806	0.940546371158906	0.887212610796156	1.39174067787177	0.945910477454351	0.498566585821983	0.084133570279518	0.247852998742231	0.0670579569784838	0.209036938671299	0.226124741719581	1.03524348505997	1.22835081149745
2008227	9	1.0296522519895	0.452734332316236	0.478751024578974	0.29630811904779	0.425959794270161	0.184183383895382	1.057485054169	0.65330323588462	1.05110787145696	1.45796867345402	0.973364326908671	0.431562674103684	0.0729069799908663	0.257712953522772	0.0725481077391462	0.213481364800158	0.292346266810491	1.15798001093774	1.22362670652041
2008227	10	0.972719865241528	0.519274532982615	0.45163176757733	0.379270341232327	0.366556556096533	0.188429707295788	1.11410649978309	0.531020598954292	1.11951555653553	1.48710796177265	1.05704977087354	0.40440224002858	0.129445963768395	0.227432528556311	0.0814282190209564	0.215349049442485	0.370414482526106	1.18272175797038	1.19361530443788
2008227	11	0.888691555732169	0.465622945011316	0.429717738007205	0.394048873532918	0.335590774635095	0.16521207898649	1.13752278736555	0.485272700915547	1.13589464533603	1.49363581340084	1.28641191615153	0.385705881961872	0.193551541332048	0.204428969237358	0.0856648282409788	0.200088668708053	0.449060689124931	1.17927555084122	1.12550515199846
2008227	12	0.804253791179159	0.395743626195081	0.41487871732344	0.37095950881435	0.334740187837599	0.138742982432642	1.14619171662374	0.450676879448423	1.17122984388189	1.47027346035674	1.36814270239906	0.350921837433251	0.160443380608473	0.188995061378412	0.0872723783202127	0.184868178935487	0.501091718614261	1.16111785614776	1.11489951661096
2008227	13	0.711377067799788	0.348602322226677	0.404886942233444	0.333538069785994	0.32460005826454	0.116560417605686	1.15495049243314	0.418371046679518	1.16686765789608	1.44704043441038	1.38438197701218	0.289565916074097	0.143604351813147	0.165185755024392	0.0901629452073263	0.176732078265089	0.582636874164707	1.14993749331157	1.04993689772404
2008227	14	0.586411719661471	0.388538380189	0.398532610782862	0.292641937385054	0.309465150199623	0.0996974786038007	1.10892685913708	0.379527462350436	1.09603327586528	1.3444804981265	1.49690022400773	0.24610111808389	0.135270946730421	0.139375828132074	0.0951064902812415	0.1744075343401	0.681997467867181	1.17703349575163	0.878045912010216
2008227	15	0.422713436058468	0.373820840653017	0.39452080141157	0.247881931529302	0.308425639334952	0.0866599250772459	1.04959435874506	0.36737995341711	1.02266239103207	1.34764690656065	1.56314025000022	0.244376790906992	0.109870757797523	0.131493366758702	0.100776387506111	0.180329876064001	0.776364226683028	1.14576700533575	0.4547095317466
2008227	16	0.261792713041397	0.308672897920445	0.386394475313164	0.214425263190858	0.324003331884745	0.078490297167297	1.00920702453508	0.381014501348074	0.970980643194715	1.36933939361931	1.41053859972801	0.324581191959318	0.0989879441011515	0.112846166851899	0.107297114079664	0.186960331254978	0.788632705328583	1.1162478147508	0.331041629072699
2008227	17	0.137062090948121	0.25293610694429	0.371142305920972	0.211718122814669	0.336453208251876	0.0754290547140871	1.04192380346593	0.420850830896474	0.940885988812444	1.32407074285967	1.36356944329839	0.427562130831718	0.110225374761515	0.0895490201729023	0.11384324435876	0.190630591821795	0.693266451621659	1.07664345918212	0.32893863609803
2008227	18	0.0897088901417681	0.20771234659153	0.342224681795762	0.203356238561389	0.350808793267849	0.0761134347614402	1.03248715149278	0.467549027044858	0.938937400388938	1.3193408893387	1.3310986094484	0.49852765041098	0.115566037096254	0.0752724640402108	0.116796329670997	0.191003321952173	0.583483131490125	1.02597997596901	0.363405029063349
2008227	19	0.0754967551353113	0.201009474826522	0.295662205276903	0.195154121154939	0.353456441622083	0.0783867942062915	1.05448139263047	0.535465304535758	0.927000239926971	1.29550131275787	1.24639270148588	0.541142824339895	0.101668341411088	0.0564615053988186	0.112756767114358	0.18380679487369	0.47946356989322	0.981830037213138	0.391496108252811
2008227	20	0.0777371743513231	0.242674752617775	0.245991925433046	0.18113724780633	0.309109348933348	0.0855437113385528	1.11268278399476	0.629787737979049	0.899604679319709	1.19937053365041	1.16839941782716	0.526922563406259	0.0905416608541159	0.0575939619309717	0.10765829874944	0.179993082837621	0.434551917951056	1.01590928190239	0.347860620200654
2008227	21	0.0821822731395716	0.283034818431978	0.206044246704396	0.154701239106326	0.257466647242438	0.0890514666220553	1.13725251360654	0.730807946446829	0.924062952686128	1.09184489206392	0.916393193581021	0.553014993352356	0.0841025489524505	0.0601915238788678	0.104181302242606	0.166228269486965	0.394282064014377	1.06985519937912	0.311832581889385
2008227	22	0.0725179187475754	0.304635350067788	0.171758127610244	0.159952520493791	0.228311730802264	0.0895498297774088	1.11499683388585	0.814787996477703	1.03414883988285	0.994757849414076	0.716643167227828	0.723418653492393	0.0791604065021297	0.127860601654852	0.102767559758482	0.129652539005145	0.341264197287627	1.09391851641573	0.278874192430983
2008227	23	0.0574530170882106	0.310439415080349	0.148293410368345	0.21137601875198	0.212800219819611	0.090447661267746	1.08979961377389	0.853679840533632	1.06083738643459	0.971017275132183	0.612837143875134	0.787728858413233	0.149471634684321	0.074322722611634	0.122139761730059	0.0869560699381247	0.29391996857727	1.08017115562799	0.246903135583865
2008228	0	0.0669283379445824	0.307650475082785	0.135857220401187	0.262156072576859	0.236739510050429	0.0884388681618258	1.06982373806551	0.923885028060427	1.05304063241377	1.02314153709235	0.595844812143119	0.821554431683875	0.330362339936832	0.0138433849214879	0.137371454129491	0.0673790967189749	0.275291736400338	1.06033750413466	0.221968099622379
2008228	1	0.0957157347738796	0.301892678958652	0.129141885996418	0.293573965400497	0.284404519792571	0.0854328853285037	1.03462875252433	1.00325818006237	1.03054901713698	1.05091677534277	0.639158455084509	0.838449730199371	0.54714286723052	0.0122748917364048	0.143299049887362	0.0612064167655012	0.271961436983731	1.07759143993899	0.203354100343737
2008228	2	0.141059603250081	0.290803725583854	0.123109656977718	0.309190887219709	0.324070587898783	0.0817510873014233	0.984503181278759	1.01438008596082	0.992707683498637	1.06966146927686	0.596732465211724	0.849962519796686	0.662416041298359	0.00971533889632107	0.14150387259186	0.0552712105511778	0.266899741798996	1.09344007137999	0.1896278281175
2008228	3	0.181356566854603	0.277639481488671	0.116085700847751	0.31296594376301	0.343673858738048	0.0754537412732432	0.953793307983752	0.991903999211072	0.949505199051593	1.09940655154598	0.576890618694724	0.884136999333624	0.658354576686782	0.00840190072903398	0.133282608377402	0.0521139108444528	0.245253988487848	1.0913323938305	0.179868611485319
2008228	4	0.16981921396684	0.264043279212137	0.109555062692395	0.31033424124851	0.351033831759144	0.070362295218667	0.936493428210677	1.01441883663107	0.974351747083524	1.12450696924567	0.56779939947626	0.953890493980169	0.57312094645326	0.00682732000510836	0.128903310854144	0.0523512865741091	0.196149296930877	1.03609328839933	0.172795786295152
2008228	5	0.120536428142454	0.246213997718761	0.120855676779216	0.30279384159653	0.40502892067176	0.0826513849410518	0.927710323392825	1.02216267113757	0.979576871700088	1.139525339342	0.56243167146872	0.89787495598689	0.464183276618137	0.0118990159368825	0.130228265865741	0.0531839743394893	0.159945103619897	0.919535284288181	0.165140486832612
2008228	6	0.104725768163548	0.245528273204917	0.173031008746676	0.302101549371799	0.516763999320988	0.109284525987983	0.918846968014294	1.03838141246265	0.936992092372429	1.14416448991633	0.559727089407723	0.768692225577176	0.359870409054314	0.0257926816089705	0.135106696142248	0.0533771861234331	0.149048528870577	0.832280172710914	0.16159949510122
2008228	7	0.111316773336446	0.265162196486331	0.164628943311086	0.312260261775939	0.628341426751408	0.151476324879711	1.01487372725104	1.00574755704227	0.83102704751254	1.14010650345269	0.564158865816394	0.628483283917609	0.275799933167339	0.0721212984683528	0.137881175732829	0.054367365760484	0.149500578300034	0.756148621650419	0.349914733174878
2008228	8	0.130576682926444	0.305790340037431	0.132283068047147	0.31895145907493	0.679510786201123	0.205054013828711	1.06954276639904	0.944101570388717	0.76057054112168	1.06473090826144	0.555648041924058	0.581696395103634	0.219577503901814	0.134658388750184	0.131927545871887	0.0523006129093964	0.151336281722983	0.728865811390919	0.665503732739251
2008228	9	0.17784374091517	0.359450905032444	0.12286866534525	0.367045637699911	0.686718213654598	0.218094186984855	0.915332225117282	0.852293664829144	0.726815695929234	0.938856942394868	0.538008943169535	0.565248663597372	0.165388705838401	0.176832366069149	0.118081051213113	0.0507434644108127	0.159549857039221	0.73478240409063	0.86736447406836
2008228	10	0.243141632592965	0.386546038720019	0.129395580094616	0.388891823787111	0.69058812085165	0.230086949104394	0.751893524923112	0.764911663599663	0.714101282211534	0.832797737920338	0.528871119389798	0.582359150829716	0.118107542392351	0.180592311443883	0.0935162562069079	0.0468924703883461	0.165609186264798	0.741914076939291	0.700793597620739
2008228	11	0.316687228198612	0.378381596163591	0.14859614617138	0.369440146913688	0.692254558769547	0.230726494587127	0.691375948421409	0.715580406751097	0.716467605885481	0.795506952417615	0.530178513230809	0.677111885551532	0.0660080536162572	0.175328081148346	0.0623035842806633	0.0444023025937237	0.166083350411665	0.735235395081168	0.647522654885753
2008228	12	0.419589067259301	0.360284776327432	0.163939469247432	0.343246483704401	0.691009386545381	0.217781644876305	0.619330519828356	0.69886921339069	0.724741155373839	0.746669140341016	0.53595652511858	0.774885632416875	0.0254817649004515	0.169147079254779	0.0403004192080819	0.0462443945041068	0.16449426044938	0.728746754869396	0.643171902230823
2008228	13	0.599167535531853	0.341086942221586	0.165267082921959	0.32895613440152	0.691223417969258	0.201713026435661	0.57167008844626	0.690356567341705	0.726489550114084	0.760745691433552	0.55026178072362	0.759752218520891	0.0165347088695089	0.164530869858841	0.021594945291572	0.043578078943315	0.158390060969573	0.717660107149311	0.654533154303328
2008228	14	0.816901445997259	0.329682823324631	0.177947957579914	0.320364003200901	0.685808268639705	0.169058814789316	0.53717537105376	0.677329803046354	0.726970132588734	0.798055398327106	0.577994658603246	0.692191553559968	0.0155380564001343	0.151847666653886	0.0149901103717199	0.0392642363104857	0.148832635243703	0.698203685912798	0.675726128079985
[truncated: 369 more rows]
