# Supplementary material for: A comparison of sea salt emission parameterizations in northwestern Europe using a chemistry transport model setup
Source: Copernicus journal article supplement (doi:10.5194/acp-16-9905-2016), 2016-08-08
Supplement: Supplementary file 2 [file acp-16-9905-2016-supplement.zip › conc/conc.timeseries.values.sum2008.sp13.Na.DE0001R.csv]

doy	hour	pm2.5	pm10
2008183	0	0.167202669545699	1.56646579012344
2008183	1	0.168741163953637	1.47512193465083
2008183	2	0.169308792268786	1.38707447755892
2008183	3	0.166933349134855	1.29691245436376
2008183	4	0.16061710544441	1.1841049335022
2008183	5	0.147008191634586	1.03802579701965
2008183	6	0.128831336345166	0.885386417585083
2008183	7	0.115078265990393	0.78282593050744
2008183	8	0.107859446183029	0.726955368899028
2008183	9	0.104428737241396	0.695324932994487
2008183	10	0.103778502449174	0.693599268319038
2008183	11	0.110655897117666	0.744086378762903
2008183	12	0.122535048690918	0.841568421022316
2008183	13	0.14144629542558	0.947737384100125
2008183	14	0.155005256010406	0.976786795821236
2008183	15	0.144103013700907	0.871915846235663
2008183	16	0.129455814140515	0.812260680006891
2008183	17	0.139077023952824	0.948097679332101
2008183	18	0.156500886946228	1.06488779313889
2008183	19	0.155906290363673	1.03889942650527
2008183	20	0.149241201342194	0.905455368204602
2008183	21	0.168342250494119	0.893997708210447
2008183	22	0.219191379893204	1.07597836939965
2008183	23	0.213292088749824	1.03476417510196
2008184	0	0.197642291413449	0.957051010172719
2008184	1	0.190084369229372	0.896707102742904
2008184	2	0.193552536291868	0.875069770004094
2008184	3	0.144020000002633	0.680084746285993
2008184	4	0.115415486150514	0.57314517205227
2008184	5	0.114201323191553	0.529747133631366
2008184	6	0.103749036461849	0.439281578594211
2008184	7	0.100809701318755	0.389047147484252
2008184	8	0.104818226163347	0.368032568014158
2008184	9	0.0922723477172005	0.329969037839873
2008184	10	0.0812614915592853	0.279116844767447
2008184	11	0.0673911072317426	0.219856336612516
2008184	12	0.0640199321070922	0.210090756115475
2008184	13	0.066728330464714	0.222604950798158
2008184	14	0.0739856426407982	0.242741915241452
2008184	15	0.081049668738755	0.251189995116706
2008184	16	0.0980310548791012	0.303780688047568
2008184	17	0.143150174265244	0.429747565953629
2008184	18	0.188242706699859	0.544572293440322
2008184	19	0.174426105338612	0.600183798135077
2008184	20	0.210363773707078	0.923405348676583
2008184	21	0.214334281270999	0.963958388294376
2008184	22	0.215914457194305	0.98114340247844
2008184	23	0.200118441117186	0.948407312640982
2008185	0	0.175550091579535	0.90247078812154
2008185	1	0.175791199440565	0.918604405606538
2008185	2	0.204185954509136	1.03717153924913
2008185	3	0.224261061075562	1.11309962869045
2008185	4	0.222906623895706	1.14855515064587
2008185	5	0.210117376526915	1.10974179507325
2008185	6	0.171290630028972	0.893839580038105
2008185	7	0.157210516557594	0.766053747681902
2008185	8	0.156676817412292	0.814876422318704
2008185	9	0.152932127518824	0.857049883513661
2008185	10	0.151634087372731	0.947383773456268
2008185	11	0.152787242394153	1.0060816197425
2008185	12	0.160533716547081	1.05758892312963
2008185	13	0.17761765159626	1.1434734798453
2008185	14	0.219767864816226	1.31766360025079
2008185	15	0.240700878706717	1.41798016271882
2008185	16	0.208506692156934	0.993895395450749
2008185	17	0.222698190932223	1.01495577418361
2008185	18	0.241610021994198	1.06404419101619
2008185	19	0.267735473411724	1.18941125233923
2008185	20	0.282354969596083	1.2561563298046
2008185	21	0.250551353264155	1.05824046142946
2008185	22	0.234929667025819	0.898348933109076
2008185	23	0.261853252670585	0.95532359513529
2008186	0	0.325212178399073	1.1738045676658
2008186	1	0.370644590559182	1.34385924822921
2008186	2	0.386613468305207	1.40421087495438
2008186	3	0.379984397148383	1.41418012362707
2008186	4	0.365625191137124	1.38100970490071
2008186	5	0.349890344521285	1.32186494583481
2008186	6	0.336192921825039	1.19168629271711
2008186	7	0.328889961302735	1.07553871628089
2008186	8	0.325647836812579	0.977917096542414
2008186	9	0.313928789805138	0.878517272114662
2008186	10	0.294933496084371	0.790389836875789
2008186	11	0.274071060023924	0.715524249443281
2008186	12	0.248037940709382	0.641749401149603
2008186	13	0.211716063120955	0.556068980019812
2008186	14	0.175868001233898	0.484206557569667
2008186	15	0.150971761294712	0.44190692448005
2008186	16	0.137697412502183	0.43446826158397
2008186	17	0.122984921465062	0.420160438194761
2008186	18	0.111578561703982	0.394684065383356
2008186	19	0.111321494629585	0.389227699012444
2008186	20	0.124182713413786	0.43902983666996
2008186	21	0.145890375143429	0.557030162264753
2008186	22	0.146534986904963	0.545681076435916
2008186	23	0.11684531478173	0.436561250625439
2008187	0	0.109008785617685	0.423316368804768
2008187	1	0.111333669066184	0.454717091220053
2008187	2	0.112458304727949	0.481971593452803
2008187	3	0.132047965211257	0.636426617742836
2008187	4	0.153266700350502	0.796231339756976
2008187	5	0.149400908178209	0.77543064115472
2008187	6	0.131772741631258	0.658251979163555
2008187	7	0.145850015221799	0.760526853806416
2008187	8	0.170746036862539	0.949223778548977
2008187	9	0.175006028364287	0.99838568478777
2008187	10	0.186796241796266	1.11600031913235
2008187	11	0.188032802846249	1.13957697067776
2008187	12	0.158749538875361	0.913453059467702
2008187	13	0.128511654712101	0.686959972310404
2008187	14	0.104346353869147	0.502271195842576
2008187	15	0.088810894177392	0.404456265313563
2008187	16	0.0975718279866714	0.492809952540792
2008187	17	0.101033133767649	0.519399500664439
2008187	18	0.0887314752259931	0.412255839943337
2008187	19	0.0851091537366947	0.378674588966735
2008187	20	0.0903072104078291	0.414841504136111
2008187	21	0.106080512474269	0.542740703105912
2008187	22	0.114883646886622	0.625924058099299
2008187	23	0.112099013650241	0.630114682241413
2008188	0	0.13401060354453	0.821950315095948
2008188	1	0.173062094679337	1.14012460176476
2008188	2	0.206762831655301	1.42703820555617
2008188	3	0.267701403821827	1.90553074828846
2008188	4	0.264930631170881	1.92055498336253
2008188	5	0.16300404686134	1.2727094934409
2008188	6	0.0728763697163095	0.464604748075483
2008188	7	0.0612673189879813	0.290214529382096
2008188	8	0.0803080103646464	0.310203360156901
2008188	9	0.158247467254582	0.740515583187353
2008188	10	0.287281545072344	1.73184749267208
2008188	11	0.416117796387104	2.94041544409114
2008188	12	0.532606927845473	3.61201714077995
2008188	13	0.581685207092837	3.57435298031913
2008188	14	0.577365535485194	3.43604696686216
2008188	15	0.515088959675171	2.72233473265654
2008188	16	0.359369441940019	1.69228822840732
2008188	17	0.2915928371595	1.08912746702828
2008188	18	0.302917696387421	1.03731275258086
2008188	19	0.316286517564058	1.04272126891159
2008188	20	0.300971423432039	0.967061807598606
2008188	21	0.283210951954583	0.888040048274243
2008188	22	0.292332821398475	0.875033190154862
2008188	23	0.302931486859907	0.892810149860623
2008189	0	0.294802899625169	0.857331033748307
2008189	1	0.285585386269788	0.80340620779354
2008189	2	0.302518482710464	0.821100781421158
2008189	3	0.314189101836398	0.868892167599762
2008189	4	0.319282137991862	0.979806743837777
2008189	5	0.298754288322613	1.08636521071874
2008189	6	0.196570960376419	0.799636801369756
2008189	7	0.195753216577019	1.05423721812428
2008189	8	0.242207118516899	1.68310825473523
2008189	9	0.295127785683612	2.13327249318052
2008189	10	0.319447650174512	2.04175241203315
2008189	11	0.319622486526494	1.80621193184706
2008189	12	0.355424422304019	2.12232185300855
2008189	13	0.402029965484135	1.77351197294773
2008189	14	0.404139155240542	1.62200959035314
2008189	15	0.359798909004249	1.4701717560684
2008189	16	0.302516794934271	1.21192720395682
2008189	17	0.261239463144178	1.09964736969827
2008189	18	0.256542885271198	0.918563385930073
2008189	19	0.219172705985021	1.08703009309133
2008189	20	0.173722047269893	1.59838175612302
2008189	21	0.130592638251647	1.59265363045134
2008189	22	0.133038963612506	1.62919216547959
2008189	23	0.253692247159107	2.43680024125908
2008190	0	0.252387201357919	2.62743603351585
2008190	1	0.110131575746126	1.84871651750728
2008190	2	0.0633482026251911	1.58176114244712
2008190	3	0.0787138441445206	1.85552902509373
2008190	4	0.120439174561543	2.33903271780675
2008190	5	0.207488723945008	3.54168506623699
2008190	6	0.337745575691971	5.4457642433079
2008190	7	0.424473806014759	6.32208164515655
2008190	8	0.561000791283427	6.97169457214055
2008190	9	0.607837773414907	6.98033182423626
2008190	10	0.561490225505319	5.90105731392034
2008190	11	0.395946457974406	4.84399722450408
2008190	12	0.281256643787113	2.9385153155754
2008190	13	0.230890742634721	1.86219856821036
2008190	14	0.216755252183777	1.58311012318532
2008190	15	0.210329274807153	1.33481913957273
2008190	16	0.281362038146267	2.04166246869367
2008190	17	0.404963847489433	4.41465871930336
2008190	18	0.443943557470762	4.94340135385244
2008190	19	0.440416431971267	5.11794961439382
2008190	20	0.333862725520279	5.15858801641974
2008190	21	0.224469692497874	4.44222600890933
2008190	22	0.204233663213804	3.90797975534374
2008190	23	0.203274423548941	3.37372143873542
2008191	0	0.240443702103969	3.22955285574436
2008191	1	0.267152589063426	2.86723142353563
2008191	2	0.232577420444364	2.08425018748864
2008191	3	0.196111350014064	1.67978845540972
2008191	4	0.254205581610155	2.83412684292426
2008191	5	0.371440642918127	3.99310231249895
2008191	6	0.374860371228166	4.12048636731356
2008191	7	0.296394130054024	3.32150342193777
2008191	8	0.209999623194051	2.36563986832239
2008191	9	0.175659326657732	1.90972075939935
2008191	10	0.167112894289638	1.73906536207917
2008191	11	0.175143893598664	1.87650771912878
2008191	12	0.182205067657721	1.96929281476807
2008191	13	0.17769854506353	1.91271947351131
2008191	14	0.164084117099953	1.80948419431764
2008191	15	0.15134006675402	1.55468555647414
2008191	16	0.137421797017537	1.28688936326122
2008191	17	0.12554384263727	1.10898290958995
2008191	18	0.129519629878386	1.02889591901512
2008191	19	0.136375890046901	1.00821742161787
2008191	20	0.143095038262394	1.10485548967492
2008191	21	0.140217089811483	1.22545672666022
2008191	22	0.132087760640574	1.26456556251463
2008191	23	0.139952728931155	1.27279187012426
2008192	0	0.129744643006962	1.20301423104876
2008192	1	0.109655922034004	1.11055843882012
2008192	2	0.121068488330872	1.23619268743048
2008192	3	0.195371990694235	1.53340413423425
2008192	4	0.167656492786541	1.17488803563227
2008192	5	0.011654826123584	0.0938173551875155
2008192	6	0.0207897651585946	0.187779534370092
2008192	7	0.0321109522380491	0.23788777913922
2008192	8	0.126617736799484	0.943234750200743
2008192	9	0.214994124089678	1.58185156354083
2008192	10	0.179522040993583	1.51621264867004
2008192	11	0.199768531273091	1.62013429046519
2008192	12	0.232880664683645	1.75503760590856
2008192	13	0.230421325454821	1.77427825657971
2008192	14	0.248174487207302	1.7326614022106
2008192	15	0.212913953418474	1.45965341893716
2008192	16	0.166784381637039	1.21313492480048
2008192	17	0.159766018560315	1.19001972067544
2008192	18	0.184116751639226	1.33382710787212
2008192	19	0.225645727091468	1.73043222390413
2008192	20	0.275606167278866	2.13871226809986
2008192	21	0.315932629650769	2.42910566736926
2008192	22	0.316325218403509	2.55389177125577
2008192	23	0.287731442770026	2.58833079802388
2008193	0	0.278295990317784	2.54232301099754
2008193	1	0.269625408710245	2.43554442599043
2008193	2	0.266452744273657	2.3866171186015
2008193	3	0.240765727685019	2.34467654288728
2008193	4	0.249908792133246	2.5804943980242
2008193	5	0.277841991162746	3.22736260516048
2008193	6	0.283152307523688	3.58542485779772
2008193	7	0.273769754950182	3.60612509114083
2008193	8	0.263410137192735	3.69983986767011
2008193	9	0.289525077520103	4.35753399049434
2008193	10	0.291102982609824	4.13045203689545
2008193	11	0.292200594321165	3.85528674700891
2008193	12	0.292067338774167	3.44285787944044
2008193	13	0.347296090309449	3.77280425637083
2008193	14	0.414444970001467	4.61603696696021
2008193	15	0.435836013506637	4.92638529447577
2008193	16	0.420176815757001	4.34985180327566
2008193	17	0.432602200878202	4.11330877337992
2008193	18	0.391737080136208	3.57964857984504
2008193	19	0.334586143644854	2.90005771423257
2008193	20	0.3063960593822	3.05289051606319
2008193	21	0.24133073156187	2.41145574049456
2008193	22	0.2494309621128	2.22251664511033
2008193	23	0.347275859725714	2.91843344333361
2008194	0	0.433825244937419	3.70844293581432
2008194	1	0.435263398475162	3.90063462037907
2008194	2	0.428514851017073	4.06396905289154
2008194	3	0.439590470522278	4.37990877488664
2008194	4	0.392118491704404	3.6672089026673
2008194	5	0.322472787806285	2.53061485205732
2008194	6	0.296244150371786	1.8837485286254
2008194	7	0.293453109495935	2.390469247416
2008194	8	0.309830831193851	3.07185347092939
2008194	9	0.302336325400533	4.1022311290687
2008194	10	0.198013342191047	4.84001369162076
2008194	11	0.215981260335366	5.39389914302737
2008194	12	0.262382715050408	5.78630092659793
2008194	13	0.386131153827867	7.34086092209708
2008194	14	0.470732115985287	7.37169902355344
2008194	15	0.565143062055678	7.79443862858124
2008194	16	0.598183181037661	8.08641070267667
2008194	17	0.557207134074887	7.50781494628221
2008194	18	0.51671003854976	7.01409146786469
2008194	19	0.519434906451932	6.79241388757764
2008194	20	0.484197118497893	6.26382640357334
2008194	21	0.416813637060936	5.36624493111214
2008194	22	0.279712958906861	3.76378112414032
2008194	23	0.219770580885641	2.93627334082929
2008195	0	0.215999793069506	2.76508693696418
2008195	1	0.207637827251603	2.72985204782386
2008195	2	0.253138292532868	3.0311813567228
2008195	3	0.302791484351724	3.51027103044384
2008195	4	0.340952712472072	3.90842399082483
2008195	5	0.366135470798166	4.42696751147181
2008195	6	0.397007043705867	4.99413596973657
2008195	7	0.422947427682565	5.2588310650832
2008195	8	0.433558688609452	5.44747143276889
2008195	9	0.433530420471631	5.30059892741215
2008195	10	0.436798856422378	5.44036081120906
2008195	11	0.435981710223094	5.40991442308545
2008195	12	0.357010455961064	4.57874265471011
2008195	13	0.236082836153584	3.06783616886017
2008195	14	0.135222280675818	2.1155469020969
2008195	15	0.109437584104074	1.36343465507366
2008195	16	0.258809443671751	2.43591185833217
2008195	17	0.334506010932028	3.4245181627086
2008195	18	0.34383422070976	3.43918106365329
2008195	19	0.287232321966084	2.4877627974048
2008195	20	0.182662223668864	1.63662169922522
2008195	21	0.149727392499929	1.2882612256119
2008195	22	0.138303897475493	1.17998335582593
2008195	23	0.144092133258314	1.10579105088609
2008196	0	0.141332247818607	1.03406245003689
2008196	1	0.141035729646866	0.963871364123738
2008196	2	0.141926809801428	0.927368174311207
2008196	3	0.139931003949719	0.937195111298575
2008196	4	0.12608101993131	0.9932922299998
2008196	5	0.13542499917841	1.07291603813367
2008196	6	0.135440859884637	1.0908408715766
2008196	7	0.134794003453414	1.10876464966473
2008196	8	0.140041173595294	1.21301171246056
2008196	9	0.16457725559599	1.35123540988899
2008196	10	0.155360441932962	1.39465387812401
2008196	11	0.150033234492129	1.35213922406463
2008196	12	0.148577442193408	1.28628019798626
2008196	13	0.188960675017907	1.55714579569372
2008196	14	0.239239548882814	2.18423743900231
2008196	15	0.242285021264956	2.2607867223956
2008196	16	0.27110759854703	3.25168858224807
2008196	17	0.426385460471404	5.06278894934015
2008196	18	0.499242702392673	6.30391264906481
2008196	19	0.483284590121311	2.99953063908143
2008196	20	0.455247011852963	2.35915194875914
2008196	21	0.484431932351714	2.58421605999537
2008196	22	0.429587984527784	2.64845963558779
2008196	23	0.440795888552694	2.8794994058337
2008197	0	0.465615367458169	3.25100098433057
2008197	1	0.419816077584007	2.66616478432795
2008197	2	0.306550395896638	1.63281547097375
2008197	3	0.256913506424745	1.19635892468533
2008197	4	0.234775855734492	1.09148208906133
2008197	5	0.237844808162722	1.10996143545604
2008197	6	0.253319680822277	1.23023508776559
2008197	7	0.284683248701663	1.46489740212929
2008197	8	0.305211970258008	1.77329063264661
2008197	9	0.287444128014515	2.59041083877681
2008197	10	0.288015883029673	3.09656670584169
2008197	11	0.323842130540723	3.91411781046988
2008197	12	0.394018310713887	4.68238316665414
2008197	13	0.42069134609569	5.14473019122493
2008197	14	0.382060432670816	5.21434123398908
2008197	15	0.36186219174674	3.495828301087
2008197	16	0.334691620521756	2.53634601365671
2008197	17	0.169070454531612	1.35712872236565
2008197	18	0.153266579110083	1.26785264875688
2008197	19	0.162498012814815	1.62234275533056
2008197	20	0.143673779941132	1.46775308438567
2008197	21	0.159665939147604	1.52453815947222
2008197	22	0.181598960950502	1.68183467970912
2008197	23	0.0754403736351602	0.781330278711046
2008198	0	0.101478007412642	1.01153116608174
2008198	1	0.153096995627283	1.47675426619058
2008198	2	0.184447885639368	1.81391877936612
2008198	3	0.235035759358454	2.87551254271164
2008198	4	0.360279004332909	4.22657642211198
2008198	5	0.481841589123176	5.27225804501226
2008198	6	0.487286501362199	5.07392697285951
2008198	7	0.487005339061881	4.71827166174114
2008198	8	0.554852122660227	5.23139505011198
2008198	9	0.68323017286975	7.23500133727453
2008198	10	0.774469914501586	8.15982425875261
2008198	11	0.875713848698003	8.55540306981598
2008198	12	0.943333506204302	8.96225747917264
2008198	13	0.83077735649345	8.21275873560561
2008198	14	0.495292408139666	5.98139926156447
2008198	15	0.276402485881296	3.76138315573136
2008198	16	0.221374219633166	2.87271284168032
2008198	17	0.225683052951821	2.34413151075185
2008198	18	0.316142760352225	2.93508521322247
2008198	19	0.418956689825003	3.77143774806085
2008198	20	0.422582695262223	3.60831203405297
2008198	21	0.377438279442363	3.08457712862077
2008198	22	0.318731780790303	2.56993909168066
2008198	23	0.289537086649166	2.32889036481796
2008199	0	0.279086303183382	2.26609553433117
2008199	1	0.376535623200231	2.67277995546987
2008199	2	0.551244328008762	3.6514860443088
2008199	3	0.611289886145143	3.85572673529022
2008199	4	0.61563341269806	3.79535375531813
2008199	5	0.580434309288826	3.40099623973023
2008199	6	0.49227731481278	2.66218098178834
2008199	7	0.415128917421072	2.1316979508661
2008199	8	0.386442768767523	1.95251558477389
2008199	9	0.391998556024267	1.86762093492407
2008199	10	0.393733518756753	1.7928417200594
2008199	11	0.386193769760251	1.72600654295864
2008199	12	0.385405245425677	1.69208733109872
2008199	13	0.36915854038815	1.66635437428048
2008199	14	0.34117061769777	1.57664827860398
2008199	15	0.246813773508927	1.32259768892324
2008199	16	0.0974632608110287	0.771745519203292
2008199	17	0.0399036143537723	0.404281852852746
2008199	18	0.0382919802713864	0.369130405882352
2008199	19	0.0551196399786196	0.511604598901108
2008199	20	0.165477023239771	1.31247741531938
2008199	21	0.266738592181838	1.77007349034576
2008199	22	0.280454074176806	1.89043851188834
2008199	23	0.26789949303694	1.93802718946862
2008200	0	0.251263818460768	1.73927237622825
2008200	1	0.226252216509062	1.96978490103556
2008200	2	0.177717492665212	1.81029836267677
2008200	3	0.195448005505975	1.82375255340211
2008200	4	0.146711622553281	1.6303410660333
2008200	5	0.117854634093589	1.71414366531447
2008200	6	0.0850842071504591	1.39991508446717
2008200	7	0.0672945167539827	1.0437990547535
2008200	8	0.0541781318460137	0.639068930793501
2008200	9	0.0417076675143955	0.450812107883845
2008200	10	0.0391548077934086	0.398049522660331
2008200	11	0.0397725106358588	0.383575642989768
2008200	12	0.0403696610776072	0.380313307329466
2008200	13	0.0438335356990871	0.388661300183898
2008200	14	0.0502584926601196	0.411386293437474
2008200	15	0.0562113253585371	0.423932319133476
2008200	16	0.0593153651624099	0.42200737292557
2008200	17	0.0650009717548432	0.4137129339273
2008200	18	0.0686500486344467	0.404752814184741
2008200	19	0.0705914553541101	0.401057802492396
2008200	20	0.0710169410572633	0.398523286054039
2008200	21	0.0700929596889535	0.394764384258194
2008200	22	0.0687772770051662	0.404172167031994
2008200	23	0.0697571258098496	0.444893213099406
2008201	0	0.0765881338360514	0.533863284901388
2008201	1	0.0970225997276266	0.656762447178722
2008201	2	0.115829890078784	0.722695832176149
2008201	3	0.0979937294149967	0.662279953210982
2008201	4	0.0588684194514496	0.462006755101082
2008201	5	0.0474780400900705	0.376673628697715
2008201	6	0.0322579338129216	0.268131727047731
2008201	7	0.0466108441941364	0.61497770478502
2008201	8	0.0864965484517842	1.21156064446654
2008201	9	0.11280587269646	1.52371670368677
2008201	10	0.143253057427199	1.64083847829683
2008201	11	0.167290577422281	2.30003487948729
2008201	12	0.1326658487591	1.98473633229061
2008201	13	0.115436688688369	1.98166731399403
2008201	14	0.131019471775066	2.46289359583498
2008201	15	0.143683793340635	2.70540174373746
2008201	16	0.182981470260063	2.98328726455508
2008201	17	0.222111367601485	3.35824969893106
2008201	18	0.213720619640174	3.11867700876504
2008201	19	0.208434012035519	2.45235443924273
2008201	20	0.256655603816177	3.35147880315382
2008201	21	0.332891878593062	5.14266739669242
2008201	22	0.339885841770025	5.63364971371629
2008201	23	0.278769076637276	5.48418073528384
2008202	0	0.178810033574707	4.3883720842451
2008202	1	0.137054176467442	2.69925443480164
2008202	2	0.0694874082608804	1.11654502736002
2008202	3	0.113186541405041	2.21211306171558
2008202	4	0.690390546575909	12.9965758546483
2008202	5	0.782925033148383	16.8369151824407
2008202	6	0.657785284411324	15.1846991925208
2008202	7	0.584614189226689	14.9687871385143
2008202	8	0.521093182396638	14.6923341745496
2008202	9	0.49788885373842	15.127927314109
2008202	10	0.467798799629212	14.9211663283882
2008202	11	0.427204743690564	13.9020247076936
2008202	12	0.254297942930492	9.07622344132898
2008202	13	0.0806829338752451	2.16210078997096
2008202	14	0.0698734155149765	1.44817373619359
2008202	15	0.219567893794419	3.08213424558094
2008202	16	0.250276004133185	3.38677499080539
2008202	17	0.239561246505702	3.09150462789613
2008202	18	0.235135014998092	3.05769545914176
2008202	19	0.203315939162162	2.32654014630871
2008202	20	0.191194638576409	2.01621759106657
2008202	21	0.195022321749334	2.04305231897811
2008202	22	0.195424253880479	1.97392877796388
2008202	23	0.194574742455526	1.7690966639023
2008203	0	0.150508776053047	1.52326673278617
2008203	1	0.11164257638857	1.2910623505175
2008203	2	0.132917962169291	1.70100649804193
2008203	3	0.17423652213291	2.48497921147988
2008203	4	0.185945475298745	2.58770076405466
2008203	5	0.153289657818096	1.92042967863924
2008203	6	0.11780170926884	1.14445160016753
2008203	7	0.10997470234446	1.35252185701225
2008203	8	0.106607589168543	1.61804440827424
2008203	9	0.128502953437845	1.85755688318304
2008203	10	0.137739305994262	1.95028563207151
2008203	11	0.134064340999371	1.77403506724758
2008203	12	0.12515810121201	1.60791266120426
2008203	13	0.140793339337824	1.58114314165508
2008203	14	0.160930513102767	1.49164101218393
2008203	15	0.160572406807157	1.28307843510211
2008203	16	0.145230989482642	0.774775676662298
2008203	17	0.141230920934962	0.695644437641309
2008203	18	0.144064963139107	0.681472694246277
2008203	19	0.151184535747058	0.686393673375817
2008203	20	0.16114635394408	0.777917425397134
2008203	21	0.160649397318183	0.904967358585506
2008203	22	0.15029762628486	1.07124801099444
2008203	23	0.140953985469989	1.11394271613762
2008204	0	0.174433772310465	1.6000225237654
2008204	1	0.291558008002051	2.74006995265931
2008204	2	0.524712293506941	5.23008014764122
2008204	3	0.838324457010703	8.48881532553533
2008204	4	0.808032362704661	8.6213574539299
2008204	5	0.790888005997422	8.39570441628907
2008204	6	0.759564996870761	7.89299206855574
2008204	7	0.670284986021375	7.11571548665963
2008204	8	0.588418585920389	6.81479465613805
2008204	9	0.520122413630821	6.45617880298275
2008204	10	0.459860040862321	6.2134453755792
2008204	11	0.437307928949183	6.17528207618671
2008204	12	0.393202505696536	5.79187273435828
2008204	13	0.332730042622213	5.5831911421483
2008204	14	0.238128930890287	3.26031493719044
2008204	15	0.216240281801613	2.0476077257077
2008204	16	0.21131985235959	1.87506398776681
2008204	17	0.289058760772357	2.2080892075221
2008204	18	0.397475996281046	2.76942283536281
2008204	19	0.406651010150575	2.64692698722216
2008204	20	0.350868611933009	2.26862775871448
2008204	21	0.25549492162381	1.78339165655106
2008204	22	0.236993870409747	1.65320419446887
2008204	23	0.237964470900051	1.66683326934521
2008205	0	0.250629093995019	1.73271487435126
2008205	1	0.255566286405333	1.79928385268048
2008205	2	0.259505025159043	1.95816102628867
2008205	3	0.319407204990351	2.4718996073001
2008205	4	0.669118363920279	3.66858613279803
2008205	5	1.15155635351962	4.92174289642349
2008205	6	1.21355206006003	5.33923376924709
2008205	7	1.1976737657394	5.26056388647499
2008205	8	1.06449048793471	4.75370199936022
2008205	9	0.868375959554692	4.13446821531631
2008205	10	0.786324392375184	3.69341897397593
2008205	11	0.744169263438608	3.37499061336831
2008205	12	0.695948058530754	3.18587337043755
2008205	13	0.663143748601348	3.04336886557632
2008205	14	0.642463577380944	2.94446727300232
2008205	15	0.620018012694227	2.87238165979373
2008205	16	0.596984619306893	2.81758889104892
2008205	17	0.58790298985236	2.78267869390769
2008205	18	0.582492915269648	2.75408096431455
2008205	19	0.577363907202117	2.73031969732095
2008205	20	0.576791755881984	2.71161331124194
2008205	21	0.576848552097662	2.71493726388527
2008205	22	0.579057005180968	2.73753111798954
2008205	23	0.583456630852408	2.78610004161199
2008206	0	0.592416327734741	2.88232252481514
2008206	1	0.614003151383971	2.9896173260114
2008206	2	0.608788438425682	2.93524190282842
2008206	3	0.58799068990435	2.7597963216244
2008206	4	0.572471227106523	2.5877721351122
2008206	5	0.550126417091751	2.36034454495366
2008206	6	0.540995855657653	2.11850640828369
2008206	7	0.533958481788276	1.89071738635984
2008206	8	0.519964503752211	1.66261008959449
2008206	9	0.499134935311349	1.49382721585485
2008206	10	0.477261414640585	1.40013775816702
2008206	11	0.451143246387807	1.31047488070004
2008206	12	0.423333564399795	1.22593444900671
2008206	13	0.401923264357324	1.15037261036558
2008206	14	0.383627494181505	1.0647274565699
2008206	15	0.354482503887854	0.920816846511433
2008206	16	0.280867571518774	0.683307106881038
2008206	17	0.197159348483803	0.517367428620879
2008206	18	0.144208759163579	0.461292410910014
2008206	19	0.139765567696576	0.461149147589575
2008206	20	0.187896576528258	0.5859619648859
2008206	21	0.285303210949395	0.89161165465087
2008206	22	0.313708466492197	1.05091148496906
2008206	23	0.309761811122073	0.997635626303687
2008207	0	0.31524543532424	0.986011729299394
2008207	1	0.321737395218339	1.01333548496863
2008207	2	0.316380545480145	1.02293389046697
2008207	3	0.322442510824529	1.08650413998202
2008207	4	0.34102137012954	1.11394159734475
2008207	5	0.379957722955017	1.19528144638011
2008207	6	0.429682134641466	1.26179890702275
2008207	7	0.488952684821358	1.35504954020608
2008207	8	0.555459671891841	1.44113484086314
2008207	9	0.6094586377968	1.52895260888237
2008207	10	0.594953181343301	1.52659816650307
2008207	11	0.567863914409435	1.413367847213
2008207	12	0.535628121946651	1.32694393516806
2008207	13	0.50914508066373	1.27737470175598
2008207	14	0.488807591257644	1.22861282371935
2008207	15	0.456251753567822	1.17176042754664
2008207	16	0.469865803701175	1.25673445176456
2008207	17	0.451277799205337	1.29840617114315
2008207	18	0.441395702048339	1.3628341411973
2008207	19	0.463389954058554	1.4817310819665
2008207	20	0.471163966691447	1.58472754972962
2008207	21	0.472977427139167	1.66819212224286
2008207	22	0.48189002893934	1.74252374193419
2008207	23	0.49406711731821	1.8315493156761
2008208	0	0.514758641359398	1.90230101808164
2008208	1	0.541590377760834	1.93892405481511
2008208	2	0.557403781571587	1.94957305431411
2008208	3	0.577946138018216	2.0073816758621
2008208	4	0.597973200126715	1.93733964502035
2008208	5	0.599386751417777	1.84749321432243
2008208	6	0.60073110500304	1.73608743481287
2008208	7	0.60189651141802	1.57933661476966
2008208	8	0.569847972693199	1.43207987776264
2008208	9	0.522775532350077	1.24988831551329
2008208	10	0.439666768806076	1.01411758920755
2008208	11	0.390403163065738	0.903428646937798
2008208	12	0.360289658908816	0.844110344151842
2008208	13	0.329214146806367	0.804880141588504
2008208	14	0.31251620099906	0.803554213623448
2008208	15	0.299349994209077	0.816878913574658
2008208	16	0.298037838753286	0.842297067754874
2008208	17	0.31772342695888	0.930581759145836
2008208	18	0.320556875185722	0.994983604111026
2008208	19	0.336921183211753	1.10058969601397
2008208	20	0.362844194353639	1.21521117365603
2008208	21	0.377975219858634	1.30908253132709
2008208	22	0.383795972139035	1.33617446026518
2008208	23	0.401787411847184	1.42777113064921
2008209	0	0.436659257614604	1.54976832889769
2008209	1	0.472832080212558	1.65369340809815
2008209	2	0.507763965913955	1.73410588178848
2008209	3	0.531386245495682	1.68228260449094
2008209	4	0.53190577960455	1.61089457440549
2008209	5	0.527021015356799	1.53869733238217
2008209	6	0.514719980435207	1.43483755819297
2008209	7	0.487101215973248	1.27419000245039
2008209	8	0.41297193006189	1.02816027551214
2008209	9	0.348316628733531	0.808858050304722
2008209	10	0.288570635508321	0.66201664209297
2008209	11	0.236700703581277	0.559651271692049
2008209	12	0.21049277138054	0.521937974344297
2008209	13	0.195721245258534	0.50994011065788
2008209	14	0.193727813848664	0.522643761312616
2008209	15	0.199671690482734	0.560370309877391
2008209	16	0.210985694056342	0.631839047964671
2008209	17	0.21473553734214	0.711793947372198
2008209	18	0.223985141273865	0.824167375929844
2008209	19	0.245234650786991	0.971153534247851
2008209	20	0.27986424445435	1.13825959840693
2008209	21	0.295983203748021	1.15889036058681
2008209	22	0.280534183492759	1.03610378780631
2008209	23	0.294437629281682	1.00151520147404
2008210	0	0.308642574680701	0.916690567139812
2008210	1	0.279347651243775	0.779416588513495
2008210	2	0.220420258813826	0.648629629547355
2008210	3	0.165711877434105	0.585762375928185
2008210	4	0.142091020271049	0.578052199975393
2008210	5	0.134340211130315	0.54512578936029
2008210	6	0.123677778022716	0.499005988909384
2008210	7	0.113556143617275	0.437080197356611
2008210	8	0.106718061477799	0.381940714144588
2008210	9	0.0983685478562354	0.346463690225712
2008210	10	0.0888529652048299	0.267764651298033
2008210	11	0.0843670955890226	0.227203069862094
2008210	12	0.0852824934916891	0.230690817897162
2008210	13	0.0900209342354724	0.244567157812174
2008210	14	0.0970579488473319	0.276265139674851
2008210	15	0.122265438147084	0.359560540380828
2008210	16	0.162649373097233	0.465565850762781
2008210	17	0.208643887346704	0.59127526228078
2008210	18	0.233928661215013	0.707754820052032
2008210	19	0.242747046834899	0.755745368681403
2008210	20	0.278273837627564	1.07931890376043
2008210	21	0.30274888204262	1.16135063825214
2008210	22	0.310547404412569	1.15779648794828
2008210	23	0.296713074136322	1.05901352361892
2008211	0	0.280217732578966	0.968481483416127
2008211	1	0.247215322067061	0.902633819444207
2008211	2	0.206447413759307	0.81385337975242
2008211	3	0.158547652700342	0.733081575360195
2008211	4	0.12883747985133	0.699025059705772
2008211	5	0.12529882512529	0.724247409509193
2008211	6	0.133136758915505	0.76966766339332
2008211	7	0.155742636655638	0.769427105400571
2008211	8	0.191915171144487	0.971910639584277
2008211	9	0.205239253426727	1.00442945471102
2008211	10	0.20959851913077	0.990556191337928
2008211	11	0.206302393410001	0.961728523043201
2008211	12	0.196452127331186	0.988352065476491
2008211	13	0.194913807197622	1.05653176430815
2008211	14	0.205230560717255	1.17811606482517
2008211	15	0.218572105311648	1.30060777446977
2008211	16	0.248507090514169	1.50752963460302
2008211	17	0.310935015625108	1.7624396427207
2008211	18	0.356657872861592	1.94386404306714
2008211	19	0.357898863609251	2.06050541740093
2008211	20	0.346028175534239	2.09739759548942
2008211	21	0.324225159145649	1.87640858014753
2008211	22	0.306517098827646	1.77791435964581
2008211	23	0.289422824683841	1.71482054264847
2008212	0	0.282354322164191	1.67187296165256
2008212	1	0.294562215477597	1.64878383217294
2008212	2	0.307994585666735	1.52253520142304
2008212	3	0.31675892509313	1.40238941346993
2008212	4	0.31366559600228	1.24841261813235
2008212	5	0.30230668041078	1.16699265546058
2008212	6	0.270505477496223	0.924615300906564
2008212	7	0.238825018833605	0.713881207325313
2008212	8	0.209226913773122	0.568817310015751
2008212	9	0.179383415642844	0.482956735580034
2008212	10	0.163521540048859	0.440000441125049
2008212	11	0.160688546786104	0.427767305066022
2008212	12	0.162114019076494	0.428232914396491
2008212	13	0.158436468681265	0.432686887796378
2008212	14	0.149278109621845	0.453738865185838
2008212	15	0.145109684392644	0.481515133186242
2008212	16	0.145960316176888	0.508644021055708
2008212	17	0.150394904751595	0.546615536950285
2008212	18	0.156275075445505	0.590340467748098
2008212	19	0.162221689062507	0.635590304738826
2008212	20	0.167289750363897	0.682810385319039
2008212	21	0.171552641395095	0.737995959026966
2008212	22	0.180970763102331	0.801721882665154
2008212	23	0.197652645166734	0.863263859251045
2008213	0	0.233368122120657	0.925292128449985
2008213	1	0.270303940139841	0.984207410772439
2008213	2	0.32980768393545	1.05658277876092
2008213	3	0.369223523430939	1.09971777003226
2008213	4	0.365453032263961	1.06843132796566
2008213	5	0.336451242337777	0.987175408539397
2008213	6	0.266069705831979	0.806572095095982
2008213	7	0.19302797721103	0.669449992522009
2008213	8	0.167973910375163	0.636856454195351
2008213	9	0.153309728529821	0.572647326284405
2008213	10	0.131560733671883	0.481716275880066
2008213	11	0.12763706416882	0.442282519756863
2008213	12	0.122089507813631	0.402557052195086
2008213	13	0.123186760301551	0.408991066868484
2008213	14	0.132077611065326	0.461844157163103
2008213	15	0.137571631725284	0.513620124289428
2008213	16	0.152762955873234	0.649163581037995
2008213	17	0.178777341877171	0.950309091420636
2008213	18	0.187923803452988	0.941622826506484
2008213	19	0.20165450535422	0.9967938193095
2008213	20	0.20988813872262	1.0407002545132
2008213	21	0.232553846597062	1.13409095288937
2008213	22	0.243617318135833	1.12880844527121
2008213	23	0.257146930632152	1.12580230336043
2008214	0	0.285777886036077	1.15967089031842
2008214	1	0.307035445844695	1.17226118841544
2008214	2	0.325656972415918	1.22670015560025
2008214	3	0.304757652860183	1.17857395097394
2008214	4	0.324127614278799	1.27485342194788
2008214	5	0.300754587780618	1.25578611764499
2008214	6	0.238992038673406	1.18503457609932
2008214	7	0.167801868931273	0.679123388975591
2008214	8	0.138191196215108	0.562788400996894
2008214	9	0.134766622297231	0.537541471684691
2008214	10	0.109882506396944	0.432275764506161
2008214	11	0.088810751899602	0.343850372524006
2008214	12	0.0862494764777792	0.321469631961161
2008214	13	0.0670856941820318	0.287285976525265
2008214	14	0.0617951604771598	0.311167121319946
2008214	15	0.0682414263478612	0.415810649472994
2008214	16	0.0780041026964852	0.554141675721567
2008214	17	0.0958608276707018	0.711613749770862
2008214	18	0.0886498569819705	0.685286574507378
2008214	19	0.0718582784443327	0.593598642911379
2008214	20	0.102682295063573	0.787515048651703
2008214	21	0.107574509320168	0.88789770709953
2008214	22	0.102046909679245	0.851593179251573
2008214	23	0.115831984520173	0.915447300567595
2008215	0	0.153370746052565	1.10606616538356
2008215	1	0.175747982100963	1.32334445425289
2008215	2	0.166703887571946	1.31560582894772
2008215	3	0.144494451925485	1.25201155464758
2008215	4	0.116744153850035	1.0295322714291
2008215	5	0.113543704989231	0.997400550462863
2008215	6	0.118430396337795	1.09123539271318
2008215	7	0.117876318118074	1.13948848425554
2008215	8	0.101657303278629	1.0223037684773
2008215	9	0.112879233058825	0.862646758472248
2008215	10	0.145742674890098	1.03676195112507
2008215	11	0.207130295093536	2.62457900338631
2008215	12	0.302035896127153	3.60761297232943
2008215	13	0.337417691513999	3.6780904537776
2008215	14	0.286071010281448	2.98374644899723
2008215	15	0.254807160331681	2.45210510086116
2008215	16	0.237525491927545	2.0007903641052
2008215	17	0.187395670310169	1.63826820785776
2008215	18	0.199792137595087	1.92372136649774
2008215	19	0.247382399081125	2.18805255901563
2008215	20	0.28311973535845	1.82534293833691
2008215	21	0.302995225334457	1.77974530628638
2008215	22	0.396275952230863	3.55024698371629
2008215	23	0.348804030153739	3.58225033410652
2008216	0	0.367934399800569	3.46897146879237
2008216	1	0.329839008989698	3.20249601002659
2008216	2	0.171525167124655	2.23452153538359
2008216	3	0.167977904026959	2.14810271935609
2008216	4	0.1987670654748	2.30840003832443
2008216	5	0.199562149967157	1.98590059985927
2008216	6	0.195694575310728	1.47292110488796
2008216	7	0.176470308442371	1.23795130047163
2008216	8	0.167620950207115	1.23672914768854
2008216	9	0.185680504686488	1.27779420482623
2008216	10	0.101593812850571	0.761791161060206
2008216	11	0.0771368623386474	1.18768077413017
2008216	12	0.162833899584991	2.254711346595
2008216	13	0.24736067083009	2.97967238924972
2008216	14	0.284703134495344	3.51130820404989
2008216	15	0.294307723793874	3.74980684445269
2008216	16	0.255973262550551	2.49322027883216
2008216	17	0.251850153401086	1.92935770828851
2008216	18	0.253058600111041	1.78139408891489
2008216	19	0.236458280181015	1.63650884723003
2008216	20	0.233710966029291	1.5917698048683
2008216	21	0.236327070703825	1.56434035430825
2008216	22	0.227127258938982	1.47406712889499
2008216	23	0.216116827452732	1.36309062733276
2008217	0	0.201367857374843	1.31696175658149
2008217	1	0.187639100132109	1.26064311763767
2008217	2	0.171657674528479	1.19121966891598
2008217	3	0.155329838392091	1.10613047478181
2008217	4	0.146441741991643	0.996473492923119
2008217	5	0.132611325097651	0.871123366574506
2008217	6	0.107859015244632	0.656355310394829
2008217	7	0.0515030456513471	0.336268236351897
2008217	8	0.0483986880751671	0.410212094204553
2008217	9	0.182527681732437	2.57524566611448
2008217	10	0.25535762937471	3.55833808078302
2008217	11	0.277468745497358	3.76532719098082
2008217	12	0.279260020413259	3.78124462570674
2008217	13	0.259648534842329	3.88373937107595
2008217	14	0.239492003070862	2.75378721810877
2008217	15	0.25841682169549	2.67607443880376
2008217	16	0.250059193318707	3.3756780974828
2008217	17	0.196278731650119	3.1072675099627
2008217	18	0.175183360549901	2.49741164800366
2008217	19	0.132608569962744	2.37993534721271
2008217	20	0.0862050606977359	1.60742204535962
2008217	21	0.0640197220614135	1.41320008690561
2008217	22	0.0690558694522184	1.59300009789852
2008217	23	0.103455711574836	2.18470390249127
2008218	0	0.150379323682942	3.04008701306415
2008218	1	0.176157265999089	3.39722648908195
2008218	2	0.187464898732659	3.46608517859287
2008218	3	0.178491715646214	3.38709353853624
2008218	4	0.178803422299168	3.35101724087599
2008218	5	0.177556192446176	3.18971560538036
2008218	6	0.162440734915391	3.08797770891234
2008218	7	0.139567202772687	2.24901541722211
2008218	8	0.123736794626334	1.34837001645712
2008218	9	0.10898155006088	1.07564693368331
2008218	10	0.103368767732693	1.00733398640093
2008218	11	0.101881486142714	0.942185331344144
2008218	12	0.0961512513811469	0.879491226027185
2008218	13	0.0915385391819464	0.819867337874849
2008218	14	0.0894620436016914	0.747037603305341
2008218	15	0.0867629220595008	0.682257000222503
2008218	16	0.083265305523973	0.620707980892983
2008218	17	0.0794946035271203	0.581364817745676
2008218	18	0.0775666709538873	0.552587144286278
2008218	19	0.0767922102531384	0.531667884509503
2008218	20	0.0786873588368993	0.525435439704651
2008218	21	0.0800568366830173	0.525918262283948
2008218	22	0.080483358072651	0.531277767228638
2008218	23	0.0830588712677641	0.551854980769037
2008219	0	0.0886956519014663	0.591727055017578
2008219	1	0.100512783696859	0.670084284851831
2008219	2	0.129946755475041	0.89200539075341
2008219	3	0.180079450894057	1.32455562323254
2008219	4	0.212645713630517	1.62334815650355
2008219	5	0.23081433527144	1.68876593250513
2008219	6	0.23597078890848	1.71118434907795
2008219	7	0.237793277792184	1.63890809581534
2008219	8	0.211817463596046	1.45567031047796
2008219	9	0.18155859568224	1.26747736262513
2008219	10	0.152341062702792	1.07536989558423
2008219	11	0.141591248841664	0.932613200068028
2008219	12	0.140119113412642	0.828955086980742
2008219	13	0.127933982880181	0.725461346896406
2008219	14	0.104905320275548	0.604909097119641
2008219	15	0.0883867992897312	0.556773891168799
2008219	16	0.0818310027817216	0.543023167020526
2008219	17	0.0822509789394409	0.54490712842711
2008219	18	0.0953607574367762	0.634048852231853
2008219	19	0.11552016930907	0.791181192091255
2008219	20	0.135536679305027	0.961136689878257
2008219	21	0.159057031187841	1.07699082912289
2008219	22	0.191941442572436	1.21552918521463
2008219	23	0.222516237483152	1.38192574713274
2008220	0	0.224171087076686	1.4078471652567
2008220	1	0.19381152672887	1.24057338288658
2008220	2	0.148549819000652	0.970473923675802
2008220	3	0.17782387434527	1.01857196722558
2008220	4	0.172298290847303	0.98497016701419
2008220	5	0.167336951395375	0.956316752852998
2008220	6	0.157659042491122	0.945421366402504
2008220	7	0.156596741412016	0.94464942021618
2008220	8	0.15569075886073	0.923087973887763
2008220	9	0.153607894951701	0.896845368915461
2008220	10	0.148899549348406	0.878216514706749
2008220	11	0.135282035841421	0.792634281602545
2008220	12	0.127950136134042	0.75384927785514
2008220	13	0.144014519174283	0.847375099096146
2008220	14	0.146494920656467	0.873136484869494
2008220	15	0.136389310753348	0.848560296798993
2008220	16	0.0825641653678298	0.536373074500815
2008220	17	0.0387828410666705	0.232454748854796
2008220	18	0.032281492098907	0.211207517201458
2008220	19	0.0528909477951948	0.377754722185832
2008220	20	0.0431388163263724	0.305332004868378
2008220	21	0.0512020355865833	0.372458099932887
2008220	22	0.0373941615241561	0.267598944696828
2008220	23	0.0582636976796806	0.435883055914979
2008221	0	0.0705241801329362	0.652106759264354
2008221	1	0.047818279721687	0.511133341949361
2008221	2	0.0407755638045224	0.436828951313214
2008221	3	0.0413098630049495	0.79763588686328
2008221	4	0.105919083327313	2.00527150501369
2008221	5	0.21576065895354	3.4821164868193
2008221	6	0.241752365513236	3.62667239568029
2008221	7	0.21143027588251	3.29783821816251
2008221	8	0.153544307225926	2.63050768085843
2008221	9	0.129782213474915	2.22750798383087
2008221	10	0.125740420406694	2.02421120663915
2008221	11	0.126319376870858	1.87854785851988
2008221	12	0.166380754586537	2.72466029750809
2008221	13	0.16940649487269	2.95905508645101
2008221	14	0.142176284466465	2.13510113869716
2008221	15	0.206950843088227	3.22316752141779
2008221	16	0.388205616750736	5.94530279170347
2008221	17	0.549999425926231	8.21082878419257
2008221	18	0.665839052164283	10.1776455396147
2008221	19	0.709164095005021	11.2549036315177
2008221	20	0.801409786290217	12.2504756516408
2008221	21	0.846827067112802	12.4450176021476
2008221	22	0.82653782957834	12.0839196171043
2008221	23	0.829001398535227	12.2746065977197
2008222	0	0.846435462436363	12.7365525370014
2008222	1	0.815533479045783	12.1998347489488
2008222	2	0.828401006862422	11.9921994718403
2008222	3	0.829253613509649	11.4878320756861
2008222	4	0.797541257196314	10.8073307158127
2008222	5	0.736244542261017	9.77292592047226
2008222	6	0.652346334111503	8.70119436739181
2008222	7	0.602298840395774	8.00461706712041
2008222	8	0.576754193700036	7.68938236145715
2008222	9	0.553966344365196	6.85493444760677
2008222	10	0.529707127857611	6.11954445898585
2008222	11	0.529380948577908	5.56221959745175
2008222	12	0.52641623086954	5.30331367222039
2008222	13	0.521747801152353	4.91473025543541
2008222	14	0.448588675635598	3.89465068245933
2008222	15	0.349875896352648	2.90865993086044
2008222	16	0.329106194121783	2.5096936484639
2008222	17	0.342274996786766	2.61199861254786
2008222	18	0.296852156579119	3.08093541095554
2008222	19	0.136575670255724	1.32314292702879
2008222	20	0.135146359917259	0.814156698282861
2008222	21	0.250673730350268	2.38192816679307
2008222	22	0.447074533377732	5.76357272998157
2008222	23	0.412717431049948	4.74091411579271
2008223	0	0.208180942717307	2.9225956779421
2008223	1	0.199789560825445	3.38344765291181
2008223	2	0.339268085643472	5.28339512416477
2008223	3	0.650010463398164	9.78742818004009
2008223	4	0.595312153303246	8.99907399643838
2008223	5	0.497918017906142	8.08440240098543
2008223	6	0.279120216718829	6.03411456139794
2008223	7	0.0609950695741114	1.3788093900892
2008223	8	0.33275751989236	5.5618957541579
2008223	9	0.603223057981032	8.53740630609205
2008223	10	0.382408318496912	6.04366224587719
2008223	11	0.250203479137507	5.27260493385395
2008223	12	0.279018921470251	5.1362404097753
2008223	13	0.254890031224048	3.72970026983705
2008223	14	0.284500435578751	3.64906191318521
2008223	15	0.307299340525356	3.50828228899967
2008223	16	0.259780056655064	2.39579400389882
2008223	17	0.253051101614585	2.99682832936079
2008223	18	0.302324037306076	4.28375715240344
2008223	19	0.275235467006822	3.76042438870604
2008223	20	0.293932366525801	3.85095739535329
2008223	21	0.38399666345643	4.80851686506764
2008223	22	0.446152107956235	5.22634776241557
2008223	23	0.504547987312134	6.41293139432788
2008224	0	0.520440874529038	6.87465194956595
2008224	1	0.432007995425678	6.35834801798114
2008224	2	0.367864347434794	5.46398038468744
2008224	3	0.452413789146405	6.12042367449954
2008224	4	0.465238726635136	6.13894526837723
2008224	5	0.493125535752816	6.3642118677285
2008224	6	0.425490253853314	5.55971450343465
2008224	7	0.332937130315242	4.40873894119248
2008224	8	0.351110486452174	4.63315997163504
2008224	9	0.41143378426696	5.07358678785689
2008224	10	0.396399640752947	4.79058073166028
2008224	11	0.349176063593252	4.51044043442097
2008224	12	0.277853045774729	3.75723146275779
2008224	13	0.273469415139978	3.53824269912095
2008224	14	0.305348351427438	4.22028253906958
2008224	15	0.313424986769422	4.09995671201947
2008224	16	0.328078596052005	3.67821275419951
2008224	17	0.341646919226861	3.43879597766251
2008224	18	0.334485050116651	3.28421573997428
2008224	19	0.322872037248963	3.13498054207855
2008224	20	0.332716322547356	3.03502065269242
2008224	21	0.351387852068175	3.02593526835177
2008224	22	0.352394126858726	3.00703800330605
2008224	23	0.35047989538901	2.91865788784247
2008225	0	0.352192801308474	2.83784514003181
2008225	1	0.357184511423036	2.68839131686948
2008225	2	0.261765032106229	2.39399460098928
2008225	3	0.169369522380756	1.41546027260603
2008225	4	0.145233530590151	0.731868276726991
2008225	5	0.168388003449027	0.625168123959055
2008225	6	0.190049080097396	0.588720520004024
2008225	7	0.191052621254275	0.583866391522697
2008225	8	0.18706263919886	0.712011311193407
2008225	9	0.185528518062893	0.763915755383177
2008225	10	0.141082093822323	0.603798402446044
2008225	11	0.123470149105826	0.550330005626362
2008225	12	0.105637062955144	0.474670989914045
2008225	13	0.077533739657389	0.324190203780789
2008225	14	0.0287730066650785	0.548410736934872
2008225	15	0.038652137360277	0.605701638786346
2008225	16	0.117158192535978	1.88312362054293
2008225	17	0.372494397507441	7.02755630531198
2008225	18	0.500845587856752	11.2302812648993
2008225	19	0.578302278178701	11.7887165062611
2008225	20	0.652033378374952	11.3564978171533
2008225	21	0.738543811896428	11.7381110466208
2008225	22	0.790548079108287	12.4292517996365
2008225	23	0.867485726901663	13.1160616044756
2008226	0	0.966084328837684	14.054783855095
2008226	1	0.944603429304918	14.1735668945251
2008226	2	0.955019537072572	13.9457346064374
2008226	3	0.997713144489376	13.5022870770968
2008226	4	0.834569063232152	11.6475588281457
2008226	5	0.62313520143842	10.4662071349645
2008226	6	0.641412219943525	11.6672246343138
2008226	7	0.654820994430549	12.3926231915846
2008226	8	0.593395769448973	12.5177587283054
2008226	9	0.649409737836698	13.2419959978321
2008226	10	0.684870048500466	12.4879633431781
2008226	11	0.638462506024155	10.4630981380151
2008226	12	0.604388609675018	9.47726854679578
2008226	13	0.53948337038056	8.26099034469592
2008226	14	0.512950787906274	7.78425402989632
2008226	15	0.523777093126129	8.47176232069118
2008226	16	0.416383032740446	6.940455369745
2008226	17	0.51643051150664	7.46152652452636
2008226	18	0.607582626919017	9.76169935314714
2008226	19	0.557976643691006	9.26957872802543
2008226	20	0.37256347303088	6.50876097626241
2008226	21	0.314645022272317	9.24697418473025
2008226	22	0.617024357540259	13.8606550580978
2008226	23	0.924900137241798	14.7817350776112
2008227	0	0.885733485852054	12.379818317585
2008227	1	0.519361974141793	9.88760998884369
2008227	2	0.268412737900858	7.53968271817717
2008227	3	0.196764160415786	3.56066217263491
2008227	4	0.175850040208732	1.6387247012804
2008227	5	0.207843043593378	2.10702258003337
2008227	6	0.266129235385844	2.26887329027905
2008227	7	0.298233531729611	2.27691854524814
2008227	8	0.276602417820825	2.4950507670981
2008227	9	0.287014464906654	2.63594861035112
2008227	10	0.292912243726013	2.63055742513552
2008227	11	0.284729297025675	2.483760853015
2008227	12	0.240592277626935	2.27785035597135
2008227	13	0.202829288417935	2.0532334290723
2008227	14	0.170757655878776	1.89968164553435
2008227	15	0.158449040876881	1.64334076886232
2008227	16	0.132869732015841	1.32086791738662
2008227	17	0.0974503106415712	1.12189765647407
2008227	18	0.0874679522878756	1.20548513793139
2008227	19	0.0862814625063982	1.25258043097714
2008227	20	0.092928089063016	1.34242003311136
2008227	21	0.0948710930220776	1.38764667082243
2008227	22	0.0841670760303829	1.41917277491467
2008227	23	0.0704110006232388	1.22688418523497
2008228	0	0.0752973276453941	1.08945571569643
2008228	1	0.0911396436360288	1.07793966547348
2008228	2	0.107638748332527	1.13162647316338
2008228	3	0.110312444501144	1.07268967558911
2008228	4	0.0775949546128237	0.794045610580107
2008228	5	0.0526801424016853	0.552769126838917
2008228	6	0.0422531527629772	0.4751804899553
2008228	7	0.044004356661576	0.460365477410545
2008228	8	0.0488901578819806	0.479522090766721
2008228	9	0.0595733693843441	0.550111177867168
2008228	10	0.0717703004763864	0.635953597198483
2008228	11	0.0861187691793611	0.726018497725246
2008228	12	0.111206677547103	0.974680028952265
2008228	13	0.176447679662776	1.57867775778038
2008228	14	0.271164621659991	2.28155634462963
2008228	15	0.361961753168781	2.86159583076501
2008228	16	0.407185900642354	3.16067410836033
2008228	17	0.421116483190517	3.21882732828688
2008228	18	0.416961201571643	3.16819169719079
2008228	19	0.413857826906925	3.09762128893813
2008228	20	0.411999076273963	3.03444803888561
2008228	21	0.399807575018916	2.92574859279902
2008228	22	0.385818576912835	2.77960518157619
2008228	23	0.384699137666702	2.71892753667996
2008229	0	0.395172944830884	2.6671850984849
2008229	1	0.393870007940387	2.50486402463538
2008229	2	0.377520881440688	2.28867490688303
2008229	3	0.364028554563333	2.08120597825659
2008229	4	0.361173157128788	1.95727290922506
2008229	5	0.365851804245221	1.80103179439264
2008229	6	0.369031652540409	1.7723292523576
2008229	7	0.375713870632907	1.82922942673916
2008229	8	0.372528263430974	2.00321107663346
2008229	9	0.357527579651407	2.1371980466983
2008229	10	0.34355995128778	2.11327274985426
2008229	11	0.335965188912105	2.06248310299252
2008229	12	0.325089887771673	2.04765681810084
2008229	13	0.316733339817369	2.05655411967805
2008229	14	0.314126526645051	2.02481033273617
2008229	15	0.312319677545342	1.9899348259296
2008229	16	0.306810154249111	1.9498375777311
2008229	17	0.297236966043714	1.89634898049686
2008229	18	0.278101053030897	1.82860928335079
2008229	19	0.254619835338211	1.67336867935601
2008229	20	0.238445472459851	1.51976752637031
2008229	21	0.233380674026832	1.44217067564021
2008229	22	0.228210524312125	1.38854941973617
2008229	23	0.226025365590143	1.35750173865144
2008230	0	0.221852932264948	1.33711606659591
2008230	1	0.209364304273564	1.26499187146279
2008230	2	0.189062284916617	1.18250266902058
2008230	3	0.201823341428864	1.2137927351314
2008230	4	0.218260550925328	1.26843545431094
2008230	5	0.233036876661344	1.32474744777064
2008230	6	0.246751593041421	1.32755984010022
2008230	7	0.249085134178935	1.25237145606698
2008230	8	0.259111716427567	1.11321988561519
2008230	9	0.269932894700233	0.875349382200689
2008230	10	0.251182359358236	0.675566226148397
2008230	11	0.237514912736607	0.58646940515282
2008230	12	0.232844123363118	0.557216183654117
2008230	13	0.227398782318789	0.543072705025485
2008230	14	0.222096909538377	0.545778780748101
2008230	15	0.222695791388881	0.5672614304453
2008230	16	0.224573239314478	0.592267900787736
2008230	17	0.227339277794321	0.62246620041467
2008230	18	0.230174949330931	0.644606975405381
2008230	19	0.230721956880462	0.654451235196021
2008230	20	0.228605570946731	0.672141679466224
2008230	21	0.240575636754583	0.758362409052552
2008230	22	0.283081051000566	1.03505245502517
2008230	23	0.327530936176415	1.35492966816672
2008231	0	0.376679048264159	1.75232402920088
2008231	1	0.406704069539312	2.07889747241109
2008231	2	0.394834626659	2.03903724602213
2008231	3	0.369672655375684	1.94017436688073
2008231	4	0.308098545529748	1.59532343321715
2008231	5	0.247535457109832	1.36185655535836
2008231	6	0.210371812072043	1.18069662737854
2008231	7	0.146728016356407	0.772253249363265
2008231	8	0.098071431995132	0.508725286976955
2008231	9	0.172487470076103	1.07227311559099
2008231	10	0.227193840425668	1.55284875835806
2008231	11	0.277538159521595	2.02990301794902
2008231	12	0.337037819547013	2.28622468081677
2008231	13	0.368071932670865	2.17800220393026
2008231	14	0.370687808554992	2.58235487701836
2008231	15	0.44324328539706	3.99138572823539
2008231	16	0.588395185364769	4.88971565801968
2008231	17	0.586308632633614	4.3509417093966
2008231	18	0.397312510796025	1.92138049317134
2008231	19	0.253490327114647	0.807161516306496
2008231	20	0.210523684506457	0.65007666957144
2008231	21	0.266991610134964	1.32992158536512
2008231	22	0.288371827319651	1.36019235796159
2008231	23	0.269346082633655	0.916400891881137
2008232	0	0.211809572009968	0.692489446790053
2008232	1	0.174832613259137	0.743995474417933
2008232	2	0.177806811593094	1.4100023879886
2008232	3	0.222358536965279	1.96706279538368
2008232	4	0.19221614352504	1.3726617265317
2008232	5	0.160551261395212	1.41956311433994
2008232	6	0.15076568120518	1.21642469809507
2008232	7	0.192106515510006	1.78927686042119
2008232	8	0.220366778823313	1.84061886489759
2008232	9	0.166314756084593	1.37678517744477
2008232	10	0.182253903018363	1.79801126501277
2008232	11	0.347358404928583	2.93938789777368
2008232	12	0.299268752217917	2.74192319543812
2008232	13	0.311558911186102	3.01425001525311
2008232	14	0.33954890135588	2.74234185854148
2008232	15	0.322347283740694	2.47028426696978
2008232	16	0.37031787649213	3.42093972473447
2008232	17	0.47869298113737	4.85143049904709
2008232	18	0.520656686790016	4.69978537622027
2008232	19	0.493960639250229	4.2402162246942
2008232	20	0.40920050516955	4.18366087970088
2008232	21	0.331957279898036	4.94938837187708
2008232	22	0.233713883094451	5.37966480451192
2008232	23	0.163680673716571	4.73523173820586
2008233	0	0.12717402535679	3.42640241063705
2008233	1	0.149223410068595	3.78884351528128
2008233	2	0.19216958959122	5.04864665058158
2008233	3	0.230595934033775	6.3250882809889
2008233	4	0.258643086082205	6.22456324130148
2008233	5	0.284002403985115	6.35825507779018
2008233	6	0.252836459974355	5.65411609815364
2008233	7	0.265907852019934	5.20618787682229
2008233	8	0.30792976402127	4.92312740638297
2008233	9	0.368843575766904	4.49196148075867
2008233	10	0.36728004214039	4.00194236061983
2008233	11	0.31010520747226	3.6676891061913
2008233	12	0.283385267955898	3.6359461257415
2008233	13	0.261714334576924	3.56991178390973
2008233	14	0.215455342165939	3.19696936137576
2008233	15	0.176724576419301	2.89376813969426
2008233	16	0.162453820550155	2.8201772798902
2008233	17	0.153035847539158	2.69817590008569
2008233	18	0.149860149366199	2.80509794733213
2008233	19	0.150337749278251	2.44859286083242
2008233	20	0.13704857160742	1.76953506479126
2008233	21	0.139156105227523	1.25034190709231
2008233	22	0.157202405205325	1.02599380140552
2008233	23	0.164968840083502	0.974354025768328
2008234	0	0.159307344839298	0.966796302934915
2008234	1	0.098908350201432	0.848718379881072
2008234	2	0.0733573480027545	0.790685144473279
2008234	3	0.17972279582004	2.81305410603675
2008234	4	0.267484406874335	3.39761206793485
2008234	5	0.26984273325091	3.57214307722249
2008234	6	0.241684236168017	3.2383302205222
2008234	7	0.165345264419564	1.32242138965945
2008234	8	0.107210037521745	0.692840167499351
2008234	9	0.0689213100414472	0.465375439909951
2008234	10	0.0517802225062665	0.344923123175148
2008234	11	0.0438745018676955	0.298579585773969
2008234	12	0.0398890511279292	0.267846357358575
2008234	13	0.0436483072219125	0.269845656220356
2008234	14	0.0470403637094518	0.258804497778451
2008234	15	0.0478843198734536	0.245650567540818
2008234	16	0.0495665258431692	0.242622496808995
2008234	17	0.0466038309612217	0.233210906632225
2008234	18	0.0434951895653678	0.231182902236909
2008234	19	0.040920488594446	0.331361633532001
2008234	20	0.0359100373527387	0.400799136558415
2008234	21	0.0356113428984491	0.611456512600175
2008234	22	0.0707591092645699	1.1435331092837
2008234	23	0.150265277865252	1.28781690248878
2008235	0	0.170450855463941	1.1013709535049
2008235	1	0.16782236053673	1.03842787346019
2008235	2	0.157052394154147	0.956660455628839
2008235	3	0.136142099505021	0.940991381814551
2008235	4	0.149298229432132	1.22555004541055
2008235	5	0.171521052663273	1.36394889374386
2008235	6	0.163480140099897	1.22157829380242
2008235	7	0.120901103633888	0.935184892560246
2008235	8	0.0820520081616838	0.654737861626569
2008235	9	0.0582512589649053	0.434424674082017
2008235	10	0.0302912973054933	0.223180767640735
2008235	11	0.0169614720775443	0.136329963899169
2008235	12	0.0309446885043529	0.307513189476632
2008235	13	0.115157980572788	1.25207275637675
2008235	14	0.229131104708727	2.12512608330705
2008235	15	0.277724517070209	2.28242762077403
2008235	16	0.291035196248137	2.27671674191245
2008235	17	0.295254492290148	2.57666897874263
2008235	18	0.298622096822948	2.91134345329854
2008235	19	0.293124686764546	3.30996526911664
2008235	20	0.28331451869025	4.10802660836939
2008235	21	0.315687624337177	4.93048605979519
2008235	22	0.335565699351663	5.21251800353436
2008235	23	0.323428219359512	5.35543276325846
2008236	0	0.322011839238097	5.41326550245145
2008236	1	0.319444740836479	4.81083550339247
2008236	2	0.319167973626656	4.3172322705654
2008236	3	0.31115080567962	3.98106260180734
2008236	4	0.305669338738477	3.70836953336464
2008236	5	0.274301365907018	3.3735840988867
2008236	6	0.250860986207203	3.05862506318981
2008236	7	0.234700715237478	2.78766580862985
2008236	8	0.220458230451176	2.55677136239261
2008236	9	0.215003708464709	2.34263655030478
2008236	10	0.222025364155115	2.10976456789698
2008236	11	0.228062159365336	1.9372556989149
2008236	12	0.229202079439546	1.84917550945555
2008236	13	0.226293022222153	1.76732867378759
2008236	14	0.223043067636057	1.71138482319024
2008236	15	0.220431375371446	1.77239068917008
2008236	16	0.217115293314602	1.81036438539007
2008236	17	0.213504517944126	1.82924636768306
2008236	18	0.207262577472141	1.83283255333359
2008236	19	0.197151665664916	1.76049322148623
2008236	20	0.190062031321125	1.69373861600148
2008236	21	0.188866309405248	1.67479652359598
2008236	22	0.193005170481146	1.64834142103112
2008236	23	0.199416348275277	1.6642026903533
2008237	0	0.205839640585949	1.66108979232477
2008237	1	0.206688347303694	1.64739860214336
2008237	2	0.197834765998354	1.57715104308618
2008237	3	0.174119653078311	1.37435293796191
2008237	4	0.138163059470385	0.981819970739854
2008237	5	0.0981649081781075	0.601618393651514
2008237	6	0.0787804289556563	0.452512926914122
2008237	7	0.0725331108427853	0.413982077595292
2008237	8	0.0681679366806513	0.403833534714368
2008237	9	0.0651546393894223	0.407438840069736
2008237	10	0.0673382613129797	0.432905494483309
2008237	11	0.0817029019163734	0.55424298442802
2008237	12	0.111688774233732	0.94918688863472
2008237	13	0.136120321292228	1.1681811886297
2008237	14	0.163350403340483	1.29451263632539
2008237	15	0.273567683353272	2.15622860087328
2008237	16	0.398567693528169	3.5939471156029
2008237	17	0.351941899812573	3.03428824012023
2008237	18	0.230638038073872	1.75610224929484
2008237	19	0.22888671529389	1.63801236988184
2008237	20	0.264004935720263	2.38627640686311
2008237	21	0.313353017099992	2.95555215653182
2008237	22	0.33113616810063	2.94076115406765
2008237	23	0.323229605274514	2.67185465229576
2008238	0	0.300838141197825	2.41227410183475
2008238	1	0.27674315134339	2.22940633831759
2008238	2	0.269370549016045	2.25714488243543
2008238	3	0.247501430501822	2.26707346394011
2008238	4	0.255405546358524	2.04710898264653
2008238	5	0.269569416302818	2.0401865379825
2008238	6	0.27363010829088	1.99518085427368
2008238	7	0.260758708336337	1.85071922479906
2008238	8	0.240906105953114	1.62717902421211
2008238	9	0.240800123927522	1.58764777376549
2008238	10	0.24162479200308	1.63043824128846
2008238	11	0.231413396823434	1.50509452849838
2008238	12	0.169770729762437	1.13084684508118
2008238	13	0.094274895580832	0.560898181758361
2008238	14	0.060566346242604	0.471037525386169
2008238	15	0.0700897886432259	0.538738469736836
2008238	16	0.131283657974909	0.900895290055967
2008238	17	0.314302333149463	1.8562661619666
2008238	18	0.44169194735025	3.29239847125728
2008238	19	0.50082988664696	4.71695202130738
2008238	20	0.553513607382786	4.95721255725506
2008238	21	0.590572745035787	4.75623895269439
2008238	22	0.632461153445644	4.57609800518057
2008238	23	0.499964795302787	4.55653547889149
2008239	0	0.417299201670293	2.97764609749812
2008239	1	0.407669200694743	2.58872671793918
2008239	2	0.489791062337178	3.18581257316017
2008239	3	0.543650942564147	3.67699664564879
2008239	4	0.379767294056613	3.71696480533612
2008239	5	0.247906722128324	1.76946950475592
2008239	6	0.292528448517611	1.57661422144992
2008239	7	0.402271171603567	2.19336852653225
2008239	8	0.436304770519008	2.31068300850914
2008239	9	0.417152911192068	2.14559602913002
2008239	10	0.285047242658962	1.90577401570329
2008239	11	0.267181974352659	1.68656054587822
2008239	12	0.247174648570769	1.48063594820759
2008239	13	0.227877586378395	1.32513011271043
2008239	14	0.208842000613681	1.26052700570398
2008239	15	0.197201042117485	1.21508501641755
2008239	16	0.190337917502686	1.1760448327856
2008239	17	0.184975186383602	1.13885506514751
2008239	18	0.169232324094117	1.10209132994756
2008239	19	0.177974385266251	1.09544786995573
2008239	20	0.203026325510708	1.08702937359609
2008239	21	0.271834117605899	1.16865837344309
2008239	22	0.346132820335262	1.42705082081448
2008239	23	0.399691620783901	1.84727198595074
2008240	0	0.420359021682143	1.91118948097891
2008240	1	0.57352624977283	3.77933028171562
2008240	2	0.638356183672301	4.55818626947661
2008240	3	0.59468395304134	3.9748555044438
2008240	4	0.46458906926168	3.48919683892314
2008240	5	0.45769309180538	3.6228048869354
2008240	6	0.432906467034392	4.12265849922433
2008240	7	0.40045168036923	4.22087988414592
2008240	8	0.392793731741625	4.25382728935105
2008240	9	0.410392920164916	4.50472876014099
2008240	10	0.464766905813216	5.33923311799515
2008240	11	0.499996197202163	5.75351130205301
2008240	12	0.493107219263669	5.67834316427717
2008240	13	0.611231053177475	7.38348691910097
2008240	14	0.716208088773023	8.70161748652269
2008240	15	0.822679363053594	9.39994505220978
2008240	16	0.849314794028227	9.26061701311955
2008240	17	0.842805450528832	8.15020354439778
2008240	18	0.837015641998159	7.24398501825079
2008240	19	0.839745670798793	6.79666887564766
2008240	20	0.784416646546071	6.03652946633481
2008240	21	0.527506329693632	3.94231610423954
2008240	22	0.453573781568758	3.28148108559229
2008240	23	0.366700690325608	2.63436675216989
2008241	0	0.36173498921759	2.17653559961832
2008241	1	0.335530709918699	1.92624065702259
2008241	2	0.327250250315423	1.86685992260759
2008241	3	0.337926849087248	1.88256255245748
2008241	4	0.355393385923375	1.92428062985492
2008241	5	0.36683534230995	1.88471937594692
2008241	6	0.342950528014456	1.64495949932248
2008241	7	0.310729940170039	1.45285474041366
2008241	8	0.302406136465154	1.43918126360169
2008241	9	0.302941564495869	1.55612259676472
2008241	10	0.309438254100111	1.92411304938096
2008241	11	0.314020098795418	2.45502614387067
2008241	12	0.291964409237364	2.73454343164741
2008241	13	0.304082516619168	3.01092753695202
2008241	14	0.360105465711938	3.48867037890538
2008241	15	0.441264290432029	4.1285953546156
2008241	16	0.49718000187563	4.43076617125217
2008241	17	0.400287058011344	4.32902408129854
2008241	18	0.206688960154348	2.09090505327311
2008241	19	0.142572432650383	0.928771959552222
2008241	20	0.140630685766112	0.882202932704313
2008241	21	0.159279807236213	0.953993415321439
2008241	22	0.174537962736284	1.08744351781359
2008241	23	0.207275163402876	1.38842348271666
2008242	0	0.246011117217748	1.72705050154155
2008242	1	0.263425447844209	1.87852986346848
2008242	2	0.278134081219839	1.95378426098672
2008242	3	0.292918057526214	2.0405481896171
2008242	4	0.301333667080921	2.11717846781707
2008242	5	0.302108033754014	2.16788215079199
2008242	6	0.298452848267222	2.13910709242183
2008242	7	0.293064097951007	2.10454050205668
2008242	8	0.289103040022103	2.0675433702496
2008242	9	0.281362265092066	2.03742480291175
2008242	10	0.276834937628547	2.03383479100836
2008242	11	0.26180102867746	1.98953532061169
2008242	12	0.250461369714114	1.93698658643185
2008242	13	0.243122327414755	1.90632743168176
2008242	14	0.235989424774154	1.83306832886998
2008242	15	0.224698881163401	1.75014572830722
2008242	16	0.208101914364846	1.64063276443339
2008242	17	0.193146543960168	1.53723109222018
2008242	18	0.184318456700581	1.45278104891029
2008242	19	0.179382016080227	1.40689221197763
2008242	20	0.175181276545215	1.36489870904383
2008242	21	0.172000155594173	1.33158856785164
2008242	22	0.170340062110584	1.32187588589345
2008242	23	0.172204484605576	1.35150181967631
2008243	0	0.183163554139039	1.45717928944288
2008243	1	0.199872331450215	1.60922746958148
2008243	2	0.217619754786412	1.76684941131111
2008243	3	0.235255005555768	1.91184351832288
2008243	4	0.244139183408688	1.99467826630378
2008243	5	0.247910958965846	2.036460936156
2008243	6	0.252887740611073	2.09435245852932
2008243	7	0.272007434427573	2.28757668440074
2008243	8	0.310846060050037	2.65988071037981
2008243	9	0.354988057929057	3.06680277976807
2008243	10	0.383124263723568	3.32773014074683
2008243	11	0.39623760354864	3.42332698651068
2008243	12	0.384683892528156	3.31134907105191
2008243	13	0.3742356950761	3.2379392031504
2008243	14	0.371881362050131	3.20593645606264
2008243	15	0.368243211059638	3.17375469364611
2008243	16	0.368149233525109	3.15646497044931
2008243	17	0.362422630890226	3.06467328592522
2008243	18	0.325621303165652	2.7906979341639
2008243	19	0.318053919868673	2.77711718326766
2008243	20	0.317690849507623	2.80529022874328
2008243	21	0.314572220705345	2.71516726025271
2008243	22	0.271398019333244	2.23057126242128
2008243	23	0.236738957488789	1.77624515757836
