# Supplementary material for: A comparison of sea salt emission parameterizations in northwestern Europe using a chemistry transport model setup
Source: Copernicus journal article supplement (doi:10.5194/acp-16-9905-2016), 2016-08-08
Supplement: Supplementary file 2 [file acp-16-9905-2016-supplement.zip › conc/conc.timeseries.values.sum2008.sp13.Na.DE0002R.csv]

doy	hour	pm2.5	pm10
2008183	0	0.0241286215847658	0.0387128649771833
2008183	1	0.0237294866433671	0.0369395272346
2008183	2	0.0234766343509713	0.0358286811542185
2008183	3	0.0233991082852104	0.0354682140810947
2008183	4	0.0231894594706545	0.0354041253511551
2008183	5	0.0216922498459105	0.0349462687166308
2008183	6	0.0266249734425433	0.0573371617314837
2008183	7	0.0289302027793536	0.0680500693082019
2008183	8	0.0318639016045942	0.072865254436611
2008183	9	0.029772239542997	0.058798128381152
2008183	10	0.0268693714002483	0.0504150180119146
2008183	11	0.0243900017800061	0.043526202553562
2008183	12	0.02082484017259	0.0346658371654986
2008183	13	0.0180114144751621	0.0282003164313858
2008183	14	0.0155773488740949	0.0237522834127044
2008183	15	0.013772971270775	0.0206366692889803
2008183	16	0.0124453235289993	0.0185245658708495
2008183	17	0.0114606765358053	0.0171672576352946
2008183	18	0.0108145250909187	0.0164529677885808
2008183	19	0.0102173601223676	0.0158798808840198
2008183	20	0.00988060919445402	0.0150460831323471
2008183	21	0.00996859671079159	0.01465568492594
2008183	22	0.0105928198806333	0.015494739385784
2008183	23	0.0110862111065958	0.0166772335275729
2008184	0	0.0118925365036105	0.0185961106984022
2008184	1	0.0139339303219893	0.0234723651287934
2008184	2	0.0172476230957202	0.0322105002077559
2008184	3	0.0203078606033262	0.0414236030389272
2008184	4	0.0224586204891657	0.0469025742341255
2008184	5	0.0244704065009701	0.0485123786047171
2008184	6	0.0254111270755622	0.0463573726183986
2008184	7	0.0237264112789372	0.0400137576353425
2008184	8	0.021064935583498	0.0339437740094079
2008184	9	0.0169098264414114	0.0260252654010245
2008184	10	0.0131175584286683	0.0188178802376793
2008184	11	0.0111296306590587	0.0151553253915976
2008184	12	0.00988488063117081	0.0129483474998711
2008184	13	0.00875458893857389	0.0112792453359119
2008184	14	0.00819559466526881	0.0103690419151499
2008184	15	0.00773845454705977	0.0097397672531887
2008184	16	0.00743429147633615	0.00940978479236042
2008184	17	0.00713229906539448	0.00917759735402848
2008184	18	0.00681289735758889	0.00888935539195558
2008184	19	0.00622026779296142	0.00815521537565098
2008184	20	0.00567918360071362	0.00701302235465367
2008184	21	0.00553795476137662	0.00662603281672389
2008184	22	0.0055581580159555	0.00666838777575902
2008184	23	0.00670032377871383	0.0078754672073177
2008185	0	0.00865218819338639	0.0101471623173504
2008185	1	0.010474830128528	0.0122331895412372
2008185	2	0.011635814392892	0.0136538781577245
2008185	3	0.0121405729096155	0.014380799930811
2008185	4	0.0118398374786072	0.0143370088471434
2008185	5	0.0110582948647534	0.0137020955894142
2008185	6	0.010385700683291	0.0128793196875392
2008185	7	0.00910110238459529	0.0111028300759702
2008185	8	0.00764051817582237	0.00927221755365452
2008185	9	0.00688295861354454	0.00840795198810953
2008185	10	0.00623735145705808	0.00774053052946071
2008185	11	0.00565980181374533	0.00715315976066323
2008185	12	0.00516822205076413	0.00666613257461962
2008185	13	0.00467459840240747	0.00614181839241895
2008185	14	0.00430444446855828	0.00579576271825817
2008185	15	0.00399446863703488	0.00541361556894842
2008185	16	0.00378576066173249	0.00519792763695303
2008185	17	0.00326121725758977	0.00451577428844977
2008185	18	0.00324246497883832	0.00424230238246137
2008185	19	0.00376286529526805	0.00521578526057925
2008185	20	0.0103825886159481	0.0246420015804509
2008185	21	0.0429498914471772	0.134673418846711
2008185	22	0.0733609048366562	0.254260771206229
2008185	23	0.0777768369613849	0.291893988406862
2008186	0	0.0572149219161786	0.24953800987329
2008186	1	0.0394516649234315	0.192624557289836
2008186	2	0.0313790929570936	0.141084898689974
2008186	3	0.0294713667388102	0.102195293176741
2008186	4	0.0320901404562227	0.0796198416535167
2008186	5	0.0345810942223877	0.0679878006563961
2008186	6	0.0327409266530783	0.0554370655376213
2008186	7	0.0284019018981096	0.0435584539868581
2008186	8	0.0206160884994715	0.0294535582212932
2008186	9	0.011490068833523	0.0171234044390007
2008186	10	0.00670852860040441	0.0125610315235957
2008186	11	0.00496774952323248	0.0120171505706808
2008186	12	0.00402378353470822	0.0125923000884966
2008186	13	0.00408128308813851	0.0143425348376863
2008186	14	0.0061156827397428	0.0195227136061986
2008186	15	0.00642067995503502	0.0280010214046002
2008186	16	0.00856638903379975	0.0460456554897785
2008186	17	0.0108803492427885	0.0655984529606463
2008186	18	0.0140164482022432	0.0880438506147132
2008186	19	0.0203615379439097	0.119377647544232
2008186	20	0.0365771300810393	0.148683251609677
2008186	21	0.069243257034293	0.180447789395919
2008186	22	0.120309157770723	0.232229307919858
2008186	23	0.131413459305543	0.238676094566951
2008187	0	0.13211198751629	0.245665828112006
2008187	1	0.125817681346737	0.225260998484312
2008187	2	0.114626271815774	0.227873269695588
2008187	3	0.0973861144676931	0.210049053456822
2008187	4	0.0811885190286589	0.191070881077904
2008187	5	0.0710761267370474	0.182693291470906
2008187	6	0.0686381206450465	0.179695189040261
2008187	7	0.0730041478782277	0.186005957691418
2008187	8	0.0796730444135008	0.195041722895605
2008187	9	0.0828134097090897	0.195675704294836
2008187	10	0.0811910263381064	0.191924071696477
2008187	11	0.080692909487526	0.190159566713898
2008187	12	0.079998922445677	0.188832441865014
2008187	13	0.079722965050922	0.187828041096807
2008187	14	0.0797041190144846	0.186370519137141
2008187	15	0.0775257984245758	0.18271192666295
2008187	16	0.0745526273808946	0.178406511639792
2008187	17	0.0716428537143238	0.173416210508112
2008187	18	0.0673721191640549	0.166021486232578
2008187	19	0.0620991660175121	0.156259448319562
2008187	20	0.0573783279722707	0.145845496640948
2008187	21	0.053530154351241	0.136048740297299
2008187	22	0.0495162509675156	0.129133175972733
2008187	23	0.0469502469250113	0.123780364289172
2008188	0	0.0468459306404394	0.120026199472928
2008188	1	0.04795333162446	0.118533920914061
2008188	2	0.0514157107847894	0.120223260634547
2008188	3	0.0540790636112076	0.118336158529788
2008188	4	0.0541988271050553	0.111683177851458
2008188	5	0.0591005052965212	0.129282314733253
2008188	6	0.0571052158814861	0.1343060139465
2008188	7	0.0511104498204608	0.111338852003242
2008188	8	0.0485745172591205	0.0936513441290297
2008188	9	0.0502367690081484	0.0854067079257627
2008188	10	0.0370324537476631	0.0586295316687985
2008188	11	0.0271220039417988	0.0457187495645448
2008188	12	0.0355457661750738	0.0614420044142919
2008188	13	0.0959232024690233	0.176823684204665
2008188	14	0.146007253310402	0.234112625172734
2008188	15	0.16776177453989	0.248373507439525
2008188	16	0.185020780944247	0.275030889807942
2008188	17	0.206693074952688	0.322123737043971
2008188	18	0.218738612200928	0.327716712544529
2008188	19	0.222659258175625	0.307352268304011
2008188	20	0.229213288358628	0.29005755267753
2008188	21	0.233779410646889	0.279202226597402
2008188	22	0.234711885587839	0.272802700974376
2008188	23	0.230059787498644	0.261475184189722
2008189	0	0.220096947770373	0.247262822847743
2008189	1	0.213394317787668	0.238695744884558
2008189	2	0.208128044006564	0.232204972154799
2008189	3	0.199625035698736	0.224314650241259
2008189	4	0.188291010397585	0.214431543636699
2008189	5	0.178882477347433	0.201487309592642
2008189	6	0.178373665942684	0.197577990201089
2008189	7	0.187514213573373	0.20555816682978
2008189	8	0.218416457358021	0.292056943955455
2008189	9	0.188225999165884	0.273869533033804
2008189	10	0.143256989698857	0.212995731525289
2008189	11	0.1162291313062	0.213515502502506
2008189	12	0.111253405656347	0.240898471168548
2008189	13	0.117025529646489	0.269362406215859
2008189	14	0.121974952166647	0.283240713028307
2008189	15	0.136677609423782	0.30139225138234
2008189	16	0.155636640299327	0.293613125332532
2008189	17	0.175444291102107	0.322640663895188
2008189	18	0.194160931761208	0.338577372871158
2008189	19	0.20418588208134	0.359098926425648
2008189	20	0.207743881445688	0.356688323283655
2008189	21	0.186964815908975	0.294495461931615
2008189	22	0.145680491964087	0.226179871962904
2008189	23	0.0521193902062576	0.153432975131545
2008190	0	0.0495904421605822	0.246729347622764
2008190	1	0.0872848834691774	0.420077433534837
2008190	2	0.115026196328919	0.486999099145154
2008190	3	0.108917539517259	0.456205614553441
2008190	4	0.0943550769615508	0.417830576831872
2008190	5	0.142148302039141	0.540992177776385
2008190	6	0.22033318823857	0.70195616537544
2008190	7	0.22639485696114	0.625844757716284
2008190	8	0.226202367389622	0.553123137645778
2008190	9	0.251219933152805	0.558167258598556
2008190	10	0.258206637942374	0.535119276095113
2008190	11	0.227110576019303	0.397814830933812
2008190	12	0.199919765840513	0.415725541063756
2008190	13	0.178916126846667	0.540974821236766
2008190	14	0.15833560373322	0.532710699842817
2008190	15	0.167794401136228	0.546927923821983
2008190	16	0.202678524073486	0.561566590951351
2008190	17	0.234182773773773	0.587785414077737
2008190	18	0.259919799439555	0.687960282421301
2008190	19	0.216130612857374	0.541128249015821
2008190	20	0.127320775330219	0.368867619774955
2008190	21	0.130733282557167	0.324756740669238
2008190	22	0.137610610758482	0.251322062556837
2008190	23	0.162885929549524	0.262384843250319
2008191	0	0.20675032528623	0.417481335736595
2008191	1	0.191342949843382	0.390384343975138
2008191	2	0.231528832340918	0.432259674066448
2008191	3	0.292296903270554	0.598819445227207
2008191	4	0.234520933057738	0.616851869291367
2008191	5	0.23216863803942	0.618196733804245
2008191	6	0.249924375827298	0.626172875709727
2008191	7	0.218147182545915	0.661530399088885
2008191	8	0.218365558733983	0.715406011440543
2008191	9	0.232177158464041	0.782750245462479
2008191	10	0.246135083885342	0.845125255090233
2008191	11	0.235129253734304	0.713337663385232
2008191	12	0.22556252228714	0.716600396357802
2008191	13	0.214321984411624	0.950333375323191
2008191	14	0.215320897044391	1.04643513326002
2008191	15	0.2244721140717	0.87379368847968
2008191	16	0.223747959233629	0.862489561988963
2008191	17	0.226511022921654	0.92773054274275
2008191	18	0.223443974822821	0.833448877704703
2008191	19	0.213166567314668	0.725771993927449
2008191	20	0.201062557399484	0.630662490915667
2008191	21	0.202956179040188	0.474498884915833
2008191	22	0.178459462850106	0.289394355347928
2008191	23	0.0790985452497161	0.114521644208299
2008192	0	0.0125338767963043	0.0206794145329312
2008192	1	0.00255386197046337	0.00546563377347677
2008192	2	0.000870779388188154	0.00203548240296968
2008192	3	0.00115369812621929	0.00249958881697241
2008192	4	0.0046536184038399	0.00977256257911536
2008192	5	0.0071119149162447	0.0138119905652484
2008192	6	0.00228917726978303	0.00442858507875571
2008192	7	0.00140676938345978	0.00227115090336385
2008192	8	0.0346588435057836	0.0438765572044283
2008192	9	0.0961262417592447	0.104222241614705
2008192	10	0.109756828390042	0.141156282896125
2008192	11	0.113144423205467	0.177253990183121
2008192	12	0.107004707765614	0.178755781215053
2008192	13	0.114574764398106	0.312067960071602
2008192	14	0.13560002114108	0.402272145962386
2008192	15	0.147637889359984	0.394222761832751
2008192	16	0.112222901938946	0.202055690300602
2008192	17	0.0827978366902286	0.142351981669918
2008192	18	0.0196710140639155	0.0302133741730384
2008192	19	0.0307399938437502	0.0518697704929478
2008192	20	0.0562520420705276	0.093141105181623
2008192	21	0.0476632140215201	0.0841567517049899
2008192	22	0.0119022265150935	0.0231479478797689
2008192	23	0.00442827367684577	0.0076164137153054
2008193	0	0.0143802182546545	0.0235454534830748
2008193	1	0.0342520506632023	0.056834469384109
2008193	2	0.0579753309354879	0.0927216193563642
2008193	3	0.0132764664830945	0.0200584243276582
2008193	4	0.00344283874889922	0.00477753278323336
2008193	5	0.0278494182065419	0.0365501084542841
2008193	6	0.0410533209358629	0.0574921494578932
2008193	7	0.0315383318094172	0.0939567129761544
2008193	8	0.0389326939725629	0.13842606239275
2008193	9	0.051200530469767	0.144146951205195
2008193	10	0.0559933214278419	0.139321551188556
2008193	11	0.0569984975696133	0.130949017392024
2008193	12	0.0561325450864705	0.120115417118023
2008193	13	0.0504426376712194	0.103961061110479
2008193	14	0.033044339324864	0.0684782808322352
2008193	15	0.0261806296614775	0.0598332931564741
2008193	16	0.0335009455350535	0.0751204719096624
2008193	17	0.033477976758183	0.0730047166683897
2008193	18	0.0335656442528376	0.0707101303790656
2008193	19	0.0333431540782928	0.0667822719996147
2008193	20	0.0308480019129503	0.0617534988355743
2008193	21	0.0268078846160296	0.0550965462716378
2008193	22	0.0171216697317254	0.0426574533892513
2008193	23	0.01957202222667	0.0506922027128056
2008194	0	0.0352958926978263	0.0758739162892468
2008194	1	0.0502845124011354	0.102048126409026
2008194	2	0.0510628742575555	0.110236910646395
2008194	3	0.0519686170445831	0.200547032109451
2008194	4	0.0612053405375926	0.283528466624853
2008194	5	0.056207059504811	0.183404490958629
2008194	6	0.0583431814529453	0.271253574626698
2008194	7	0.0598101406131637	0.247725088531834
2008194	8	0.097294151960997	0.256725129597018
2008194	9	0.167453192225257	0.406152623749128
2008194	10	0.156887034247328	0.373509245272425
2008194	11	0.159823776218685	0.392662304343781
2008194	12	0.174740214433698	0.500984215568463
2008194	13	0.175444345644723	0.524668624859166
2008194	14	0.162206647084013	0.477955559931451
2008194	15	0.131466643943462	0.306997069468266
2008194	16	0.064245765614421	0.124580643434625
2008194	17	0.0196431134263117	0.0540080127190078
2008194	18	0.0262401454493868	0.138280478670069
2008194	19	0.104604337708639	0.44284601172322
2008194	20	0.182754283018223	0.633254216560545
2008194	21	0.213048410611733	0.675141619500946
2008194	22	0.219265953930533	0.63588220438005
2008194	23	0.223614494858837	0.531629780995844
2008195	0	0.216254428395575	0.452935447344619
2008195	1	0.204007809987233	0.376812693625945
2008195	2	0.190471270668929	0.33861398327189
2008195	3	0.1788131819658	0.313686127343653
2008195	4	0.16481428422191	0.300674676726257
2008195	5	0.150585623936928	0.30165660867464
2008195	6	0.128715260009319	0.375528632097039
2008195	7	0.116480398944119	0.369948158564834
2008195	8	0.110684441633089	0.323216786515111
2008195	9	0.101883331844247	0.279699518312617
2008195	10	0.0895801834553556	0.226406064113246
2008195	11	0.0736163182197249	0.162314511415345
2008195	12	0.0589987999544215	0.109198601704353
2008195	13	0.0531979319749831	0.080970725269547
2008195	14	0.0519358656284043	0.073000819398531
2008195	15	0.04828691858198	0.0660645037650579
2008195	16	0.0432078767031371	0.0597266048442835
2008195	17	0.0411199216270077	0.058539658153569
2008195	18	0.0410514111629166	0.0620010506902389
2008195	19	0.0398932525895129	0.0589241419443372
2008195	20	0.039206995227707	0.0605868805644226
2008195	21	0.0400580255275194	0.0657351452634294
2008195	22	0.0408645837152841	0.0682393817303371
2008195	23	0.0433206086410503	0.0713054809980722
2008196	0	0.0477574218527229	0.0803948811540191
2008196	1	0.0551587507187399	0.0926364285779026
2008196	2	0.0616959137010161	0.104213078427408
2008196	3	0.0762002659661343	0.143021952446157
2008196	4	0.098529283048177	0.230475261196817
2008196	5	0.148209740205752	0.536275642694211
2008196	6	0.22438095662956	0.997404138648711
2008196	7	0.276609799111892	1.08918842468811
2008196	8	0.300791353890026	1.07750758503191
2008196	9	0.252412468366994	0.780340559400175
2008196	10	0.215620983684874	0.642290411705763
2008196	11	0.187729079327169	0.578264250173191
2008196	12	0.173309641339931	0.477768418652651
2008196	13	0.158124339456164	0.394549021804696
2008196	14	0.132665548428135	0.316714862367071
2008196	15	0.106349695105552	0.24854209282425
2008196	16	0.0828916757405695	0.18755121241168
2008196	17	0.0739517225059149	0.151191691902316
2008196	18	0.0722641719890201	0.130156912414066
2008196	19	0.0769540465312539	0.113458927418547
2008196	20	0.0740406887338599	0.0971562133137661
2008196	21	0.0749615324662707	0.100252183648694
2008196	22	0.0881586475242408	0.125829529444822
2008196	23	0.0915407835591011	0.191115506124077
2008197	0	0.0902689375165829	0.323503879861993
2008197	1	0.111009808423858	0.547104177119037
2008197	2	0.237794786490721	0.892632866445141
2008197	3	0.331228752423171	0.947616739443366
2008197	4	0.324698502905958	0.935463768123933
2008197	5	0.319835822262475	1.11258438526066
2008197	6	0.323932951055446	1.31045439586199
2008197	7	0.303794457479394	1.1895709840986
2008197	8	0.224077622246501	0.804663601192338
2008197	9	0.183945391243858	0.579396599237394
2008197	10	0.182194388948289	0.51418231948089
2008197	11	0.184071612561348	0.454138770998969
2008197	12	0.185164873301192	0.410560413381184
2008197	13	0.166857048824274	0.335261773325782
2008197	14	0.140174809997981	0.260607403531072
2008197	15	0.112147153994465	0.201542970748667
2008197	16	0.0827167958071379	0.148820822258619
2008197	17	0.0611572529006894	0.113323204154578
2008197	18	0.0611709995757256	0.11278524457076
2008197	19	0.0582628581028996	0.114792990111409
2008197	20	0.0433650817799185	0.0909540494362238
2008197	21	0.0329939269745027	0.0666337082748395
2008197	22	0.033166526954462	0.0704799167969422
2008197	23	0.0450695421347987	0.109029669569383
2008198	0	0.0530058661442382	0.141624328492867
2008198	1	0.0488976328669262	0.14262356426973
2008198	2	0.0399327392354034	0.126154097628674
2008198	3	0.0337248033407414	0.100462423218062
2008198	4	0.0336004040477813	0.0918143461498686
2008198	5	0.0336303560242445	0.0900479887468427
2008198	6	0.0468959286694228	0.138238184660692
2008198	7	0.0638727829780657	0.211980047886318
2008198	8	0.0645736328199253	0.222947393125114
2008198	9	0.0460839256720334	0.16818404260316
2008198	10	0.0216392338815402	0.071827851133649
2008198	11	0.00497078227914405	0.016399834729107
2008198	12	0.0159892009464698	0.0747300642784345
2008198	13	0.171425018752453	0.500273243883261
2008198	14	0.218963938053871	0.54637527083174
2008198	15	0.207998715452572	0.476251801376578
2008198	16	0.216038038191412	0.471060955118549
2008198	17	0.234020556268034	0.50640966009018
2008198	18	0.235482266250259	0.495460766371036
2008198	19	0.232099533060679	0.441230894329565
2008198	20	0.227449891103542	0.419575389517009
2008198	21	0.272742248810809	0.536375009363506
2008198	22	0.39226328722596	0.844667762356843
2008198	23	0.476081988098389	1.00647033171259
2008199	0	0.483361452427906	1.03742737712895
2008199	1	0.460572840780909	1.14760357954324
2008199	2	0.413141843535192	1.25337924186958
2008199	3	0.420127139601095	1.08958229563157
2008199	4	0.39625762078852	0.601539081997372
2008199	5	0.378791852569119	0.545085858971929
2008199	6	0.367994841524802	0.594588264617635
2008199	7	0.414858151807822	1.12281024762097
2008199	8	0.414919175314324	1.272102622683
2008199	9	0.367066602404175	0.959246383506007
2008199	10	0.236082579835163	0.701387850251278
2008199	11	0.169040828479765	0.515719042664197
2008199	12	0.125168167755469	0.375320786415953
2008199	13	0.105505309190435	0.270210738257182
2008199	14	0.0777675594924933	0.161244449955382
2008199	15	0.064290556081167	0.108078587220376
2008199	16	0.0651634270290047	0.10220423974348
2008199	17	0.0905987187212677	0.149903949106194
2008199	18	0.106129847905291	0.175383424835396
2008199	19	0.0997579159418911	0.165787219780679
2008199	20	0.0834485765762895	0.142642148304024
2008199	21	0.0601390663056688	0.109030433510766
2008199	22	0.0468770143062062	0.102861912151092
2008199	23	0.0448881126832313	0.130883640251245
2008200	0	0.0666587473835375	0.157157102028203
2008200	1	0.0967316480964707	0.184215698773231
2008200	2	0.123937175733373	0.200120829870911
2008200	3	0.137716416702125	0.206256935123541
2008200	4	0.14090211263703	0.202882855308742
2008200	5	0.139758926125914	0.185374519853453
2008200	6	0.0816156369124022	0.107380135547642
2008200	7	0.0202460284011538	0.0316258485985939
2008200	8	0.0124347501505512	0.0249233564284687
2008200	9	0.0122320906790786	0.0209875962275553
2008200	10	0.0123838422054686	0.017142706824874
2008200	11	0.0172665455142936	0.0226929961372641
2008200	12	0.0207613221573822	0.0270951273344581
2008200	13	0.0223200784578546	0.0306962537044634
2008200	14	0.027256025225931	0.045629040554547
2008200	15	0.0455388990455141	0.0924300341022573
2008200	16	0.0655350378109534	0.120275839207769
2008200	17	0.0695846336423465	0.113108223396932
2008200	18	0.0667105306333981	0.106996049479925
2008200	19	0.0655551859065335	0.118904048896085
2008200	20	0.0652445691035785	0.139268793358133
2008200	21	0.0704833067631104	0.180307226908537
2008200	22	0.0638682542103542	0.202482126822699
2008200	23	0.0500417461568062	0.187195159134512
2008201	0	0.0381996074927313	0.185138418876921
2008201	1	0.0324345241676852	0.189208629751277
2008201	2	0.0327950885836673	0.200610521998341
2008201	3	0.0358222639951717	0.19030161494762
2008201	4	0.0399329861234147	0.182044253598865
2008201	5	0.0478972010377337	0.151207752012867
2008201	6	0.0524317489742402	0.0987386162899113
2008201	7	0.0547882410522588	0.0732968305179693
2008201	8	0.0594017571217881	0.0778644655301919
2008201	9	0.054159195541243	0.112501188104178
2008201	10	0.0499086510088074	0.102229000631046
2008201	11	0.0634953511691507	0.115541194816979
2008201	12	0.0525697521365464	0.0984355713088405
2008201	13	0.0215061621435884	0.0712515362710606
2008201	14	0.0424291469183286	0.167853106141431
2008201	15	0.0964359516619118	0.320121614639971
2008201	16	0.156103535345148	0.48203871339174
2008201	17	0.183854475356698	0.551706366400784
2008201	18	0.181133956332723	0.52324576540758
2008201	19	0.165474415251835	0.478853394681646
2008201	20	0.155849420361471	0.412072031523008
2008201	21	0.118635477342194	0.310837499155859
2008201	22	0.102214253989338	0.37344542328107
2008201	23	0.14073039657886	0.656449048482123
2008202	0	0.125887060619122	0.673157893912931
2008202	1	0.111284486997403	0.714496364381508
2008202	2	0.112330261432065	0.69546140119366
2008202	3	0.0711590764503865	0.473008264563819
2008202	4	0.0425285755087068	0.341413173903418
2008202	5	0.070151399328035	0.673047965081218
2008202	6	0.103277981183646	0.955532047931893
2008202	7	0.108816493986315	0.917637857079582
2008202	8	0.113431031803616	0.872227469939867
2008202	9	0.120429833567504	0.745801907927514
2008202	10	0.12225141424815	0.59523700412823
2008202	11	0.136765454842708	0.612920163482174
2008202	12	0.167907302889247	0.670137739566467
2008202	13	0.181237032409251	0.625980051436725
2008202	14	0.174604363687928	0.536785285679382
2008202	15	0.17757308868772	0.632625142522304
2008202	16	0.151558111445302	0.625742681637261
2008202	17	0.135746316893388	0.540462023575634
2008202	18	0.171490200990594	0.840922015948046
2008202	19	0.30164074575953	1.51379200689955
2008202	20	0.346321401995089	1.66329856629896
2008202	21	0.361520308521013	1.7012422227325
2008202	22	0.367518377488004	1.68596749130428
2008202	23	0.410908867547923	2.01784182733759
2008203	0	0.430670092497695	2.16408454608516
2008203	1	0.433732953601133	2.49692612371224
2008203	2	0.450860962180071	2.41022562756878
2008203	3	0.484073183779773	2.84954056982248
2008203	4	0.576643471057313	4.10116868618709
2008203	5	0.739424762197143	4.77355108443386
2008203	6	0.699622032240084	4.72427945872681
2008203	7	0.331839972121364	2.00736946481701
2008203	8	0.0440516976832506	0.239178369816468
2008203	9	0.0135310764388114	0.0787294563653947
2008203	10	0.0444022373797361	0.291498768908496
2008203	11	0.0949031074663914	0.557858707028352
2008203	12	0.102581260432955	0.590497355972312
2008203	13	0.0680834091701037	0.502620737530513
2008203	14	0.09356774720286	0.792196030787083
2008203	15	0.141062682651705	1.20506095549201
2008203	16	0.189354613660902	1.40828041093298
2008203	17	0.239496242645487	1.47432071012937
2008203	18	0.244693334057465	1.33919559144013
2008203	19	0.137875249257025	0.758996231340411
2008203	20	0.0498369276294215	0.260382084385163
2008203	21	0.0503221061977354	0.252422080478088
2008203	22	0.0663229482414982	0.437882633549993
2008203	23	0.0713934452640284	0.497942880638746
2008204	0	0.0770033691386618	0.502659979807605
2008204	1	0.0849625341115805	0.536259546216828
2008204	2	0.0911910244571941	0.534831389953486
2008204	3	0.0896261890294967	0.494269128828863
2008204	4	0.0887313938332201	0.475717016385657
2008204	5	0.0857754516481449	0.432834657723999
2008204	6	0.0768188672825951	0.365307243432744
2008204	7	0.0735596416917281	0.340980108561098
2008204	8	0.0725322648375024	0.322111388896639
2008204	9	0.0732560061153712	0.298125184143894
2008204	10	0.0759196388070893	0.265858941789546
2008204	11	0.0789005171280897	0.228481982627922
2008204	12	0.099730345674336	0.253565557583445
2008204	13	0.248283549988761	0.57798644484039
2008204	14	0.454099255882891	1.08326267875665
2008204	15	0.495353106914053	1.26048696916227
2008204	16	0.483073722968941	1.24148413400338
2008204	17	0.456429973322791	1.19341735174574
2008204	18	0.415396094353233	1.08553179995671
2008204	19	0.371220534816895	0.904763077717514
2008204	20	0.345193396607936	0.697409050098453
2008204	21	0.32182870594877	0.539462358515062
2008204	22	0.280373134321162	0.44192081649777
2008204	23	0.249163633285807	0.490203337673836
2008205	0	0.222188251494975	0.540874548873634
2008205	1	0.202837769531957	0.581621253932514
2008205	2	0.184085332372684	0.704843393300115
2008205	3	0.17982356068576	0.957970582014018
2008205	4	0.196657829827386	1.23123755473053
2008205	5	0.222475631524949	1.37808303029832
2008205	6	0.264379348032736	1.62470439038233
2008205	7	0.321111232441889	2.03128276350363
2008205	8	0.231199402091739	1.4849666372364
2008205	9	0.165351935345774	1.04461154911334
2008205	10	0.161519973212065	0.95670247450479
2008205	11	0.163109401986286	0.893071891420092
2008205	12	0.160035938219117	0.80858500143672
2008205	13	0.15465993971742	0.735572237131551
2008205	14	0.152937104494577	0.68274762926076
2008205	15	0.154626255552984	0.630589490164796
2008205	16	0.154155138224453	0.584929027904461
2008205	17	0.144040650419934	0.55477656257596
2008205	18	0.139455963110437	0.552121469104183
2008205	19	0.143002779481319	0.602037816922374
2008205	20	0.147523592663789	0.629434709063195
2008205	21	0.169743089080396	0.715270813807374
2008205	22	0.197162323403791	0.965873144600123
2008205	23	0.205351645891379	1.0447747459248
2008206	0	0.202770528717539	1.03449090648558
2008206	1	0.198863235476582	1.05393384653927
2008206	2	0.20268008788532	1.04411561650718
2008206	3	0.207746368945014	1.00480228968537
2008206	4	0.220192682405178	0.96471570714899
2008206	5	0.245315539485806	0.990856905661133
2008206	6	0.293658728686504	1.04190962578404
2008206	7	0.276705588444597	0.779736256037009
2008206	8	0.227881366301404	0.522687423861678
2008206	9	0.169320470744581	0.345395090385413
2008206	10	0.129083521557397	0.244758425329823
2008206	11	0.10050273328058	0.17992758330609
2008206	12	0.078607467012112	0.134453166871319
2008206	13	0.0624423501277193	0.103552018488165
2008206	14	0.0591284375282836	0.0944165514807897
2008206	15	0.0630320703591622	0.0997947126604692
2008206	16	0.0731417491601852	0.112942259380214
2008206	17	0.108549637877846	0.141753491850999
2008206	18	0.167957112099678	0.23145162199673
2008206	19	0.230197862584419	0.346760565256536
2008206	20	0.291168253521758	0.459397905989724
2008206	21	0.320589927719243	0.51146709439994
2008206	22	0.355685599475687	0.545250204987841
2008206	23	0.384382721037577	0.553991800986428
2008207	0	0.376523141953553	0.485298609371426
2008207	1	0.322652722435969	0.386482585351439
2008207	2	0.315791554760712	0.37066353332509
2008207	3	0.320625863214732	0.37539417536713
2008207	4	0.329463123248545	0.384227518615677
2008207	5	0.343785070553219	0.393043006386974
2008207	6	0.350022712463787	0.388286026153695
2008207	7	0.334082415710481	0.360503057822279
2008207	8	0.253471051690374	0.268826481094297
2008207	9	0.201778753030595	0.212738061622245
2008207	10	0.194561022254122	0.206711232497687
2008207	11	0.24231074673928	0.265756197548506
2008207	12	0.312486714749529	0.341257968388591
2008207	13	0.340046756684074	0.363277171110053
2008207	14	0.287622230337419	0.312744564006972
2008207	15	0.206193908535274	0.225785370128634
2008207	16	0.159248135702801	0.173843456290375
2008207	17	0.133629061314288	0.146926302045259
2008207	18	0.156037184414548	0.171554800301595
2008207	19	0.238659522334725	0.26233825492607
2008207	20	0.307568772545224	0.34176464201269
2008207	21	0.311377924756014	0.349546735785374
2008207	22	0.301163112922291	0.341456679912873
2008207	23	0.276108501185402	0.314199059071474
2008208	0	0.203849167895643	0.225812224125033
2008208	1	0.144649852040037	0.158780053984884
2008208	2	0.124999166843024	0.137543633844006
2008208	3	0.121561471137775	0.134207481022079
2008208	4	0.121467807217651	0.133419286994302
2008208	5	0.12043870553219	0.131125164202783
2008208	6	0.116568656702547	0.12498462246092
2008208	7	0.100218497510176	0.106619663942607
2008208	8	0.0769630505525959	0.0812496355136462
2008208	9	0.0601530734555497	0.0631609298421329
2008208	10	0.0419440370340682	0.0439768413674687
2008208	11	0.0341030370656225	0.0357810381165278
2008208	12	0.030399504546335	0.0319731102222308
2008208	13	0.0290477396212484	0.0306231713268898
2008208	14	0.028291332059483	0.0299823990022968
2008208	15	0.0281952202744724	0.0299070274773674
2008208	16	0.0282642924216364	0.0300412047706695
2008208	17	0.0289822346493715	0.0308582519655982
2008208	18	0.032345929216409	0.0344236564024237
2008208	19	0.0518976602427987	0.0555212971772397
2008208	20	0.0950335816188192	0.104196256110911
2008208	21	0.128044684436851	0.141659614308765
2008208	22	0.115758062780192	0.1267385619143
2008208	23	0.0795517327507184	0.0835457428148182
2008209	0	0.0490044689305087	0.0504549706084202
2008209	1	0.0406845232848154	0.0419074091130461
2008209	2	0.0396751254011333	0.0409375535095858
2008209	3	0.0398912645596	0.0411255984486097
2008209	4	0.0419188894559643	0.0431398369657248
2008209	5	0.043774744018434	0.0449014734324187
2008209	6	0.0446218933767114	0.0455679023170923
2008209	7	0.0440853573347706	0.0449208186835017
2008209	8	0.041814400846273	0.0425890716778206
2008209	9	0.0371148773061805	0.0379035730112153
2008209	10	0.0343910888478118	0.03538178629486
2008209	11	0.0338428257230158	0.0352262228824762
2008209	12	0.0320500590533405	0.034383915259428
2008209	13	0.0296033953500413	0.0315588400144078
2008209	14	0.0277905326733682	0.0293140917105433
2008209	15	0.0275003036724029	0.0283743311395665
2008209	16	0.0277409299436724	0.028390381069687
2008209	17	0.0273242120363327	0.0279065124207273
2008209	18	0.0263291212929534	0.0271705122120102
2008209	19	0.0231680614731523	0.0240598867862269
2008209	20	0.0189074918141277	0.0195995310412715
2008209	21	0.0160742051291881	0.0165944763122806
2008209	22	0.0152144200994279	0.0156746725606396
2008209	23	0.0136309245984713	0.0140273903204367
2008210	0	0.012862388063377	0.0132494605982789
2008210	1	0.0129200668587687	0.0132686096610571
2008210	2	0.0134793221408109	0.0138221973573432
2008210	3	0.0141413375974909	0.0144972070477196
2008210	4	0.0145437765159328	0.014948374099851
2008210	5	0.0159152016749226	0.0164871028748315
2008210	6	0.0190084878823654	0.019632589870882
2008210	7	0.0213992005983017	0.0220586659315193
2008210	8	0.0221762413373523	0.0228803345308355
2008210	9	0.0217098319992294	0.0225145279700932
2008210	10	0.0208014647085234	0.0217646045778708
2008210	11	0.0195413505900721	0.0206488634665687
2008210	12	0.0183756934460309	0.0195692285359328
2008210	13	0.0177010185539337	0.0192882872888011
2008210	14	0.0183652419447681	0.0204418509320725
2008210	15	0.0199377117225677	0.0223526324894383
2008210	16	0.0219697289366263	0.0246761644509296
2008210	17	0.0242889599391511	0.0269581235823688
2008210	18	0.0282829579029924	0.0308708368147904
2008210	19	0.0351282192487164	0.0380626623359514
2008210	20	0.0437287062266643	0.0466603948548275
2008210	21	0.0447765862693553	0.0478887413484172
2008210	22	0.0426764284129602	0.0449937507867448
2008210	23	0.0359275064740623	0.0374748400548057
2008211	0	0.0300249442641726	0.0312406604178339
2008211	1	0.0252336038195262	0.0262411282819825
2008211	2	0.0228414164948477	0.0237458031094699
2008211	3	0.0219775670704181	0.0228212446927228
2008211	4	0.0211507665190576	0.0220516198402887
2008211	5	0.0205015020495784	0.0214104005680328
2008211	6	0.0200954795544728	0.0209574463837836
2008211	7	0.020323603059702	0.0211571283408415
2008211	8	0.0210204953515841	0.0219477907867431
2008211	9	0.022441708473242	0.0235357478647665
2008211	10	0.0244453270694461	0.02595820086179
2008211	11	0.0259354253259233	0.027768644856311
2008211	12	0.0275782941657909	0.0297723854654132
2008211	13	0.0300794925379	0.0329720023581694
2008211	14	0.0325454266726852	0.0358680561226212
2008211	15	0.0352448749119126	0.0391630075933286
2008211	16	0.0374560747444559	0.0419541730953988
2008211	17	0.0380784867381831	0.0427436967809218
2008211	18	0.0370924399461377	0.0411673462151803
2008211	19	0.0357567480235077	0.0391313697137972
2008211	20	0.0343963035530001	0.0369197807567877
2008211	21	0.0335105450805052	0.0354918119684889
2008211	22	0.0368632211573012	0.038809032850609
2008211	23	0.0411371800181243	0.0429747061017145
2008212	0	0.039365659142082	0.0409901966332494
2008212	1	0.0352213601962427	0.0366954477701524
2008212	2	0.0295305561855424	0.0308991301262598
2008212	3	0.025557929864413	0.026836475563038
2008212	4	0.0239614761014255	0.0251895342304438
2008212	5	0.02306120484075	0.024161528698792
2008212	6	0.0222000654971579	0.0231889421310052
2008212	7	0.0211213383447227	0.0220474297347511
2008212	8	0.0197928503064954	0.020676022566912
2008212	9	0.0183467380929916	0.0192216047992918
2008212	10	0.0166853114835014	0.0176485869734494
2008212	11	0.0155393788285532	0.0167160552552323
2008212	12	0.0152216848626068	0.016681279007949
2008212	13	0.01475071156756	0.0166932911982052
2008212	14	0.0146158838011231	0.0185135882403417
2008212	15	0.0148934510246558	0.0200550517083497
2008212	16	0.0144414932321456	0.018989977401715
2008212	17	0.0137262518339566	0.0170792634353608
2008212	18	0.0132662763432166	0.0153590308816717
2008212	19	0.0135218790132175	0.0147177279309831
2008212	20	0.0159731905753583	0.0170496725589648
2008212	21	0.0187933135521131	0.0201348057769667
2008212	22	0.0190510119008865	0.0204593590256557
2008212	23	0.0189236751333326	0.0203661091260724
2008213	0	0.0186522026646942	0.0201726024013985
2008213	1	0.0182253397419024	0.0196952756151132
2008213	2	0.0172546556680361	0.0184848334765507
2008213	3	0.0157543548255299	0.0168477026091662
2008213	4	0.0142016763740492	0.0152074112729335
2008213	5	0.0132824214803042	0.0140775230542976
2008213	6	0.0127804901253023	0.0134952818398062
2008213	7	0.0124902161306155	0.0131927714283591
2008213	8	0.0122293723918566	0.0129342220156835
2008213	9	0.0119183473016769	0.012721854068682
2008213	10	0.0129198042020816	0.0140094923461217
2008213	11	0.0138174428015141	0.0151024360545413
2008213	12	0.0137882821173326	0.0151072743466279
2008213	13	0.0132459028587475	0.0145712993817766
2008213	14	0.0128289456049123	0.0141839975825375
2008213	15	0.0124742330335729	0.0137977453544825
2008213	16	0.0122274165245491	0.0134784462301061
2008213	17	0.012042105653864	0.0132044161193511
2008213	18	0.0119098773571579	0.0129886836233073
2008213	19	0.011897217089769	0.0127717031647948
2008213	20	0.0117744387287883	0.0125956837661514
2008213	21	0.0110699163614148	0.0119249462096115
2008213	22	0.00975487965600144	0.01054335901218
2008213	23	0.00857187733314672	0.00915179597451057
2008214	0	0.00786556493643863	0.00836652431382995
2008214	1	0.0077231054817811	0.0082141924498211
2008214	2	0.00764100233373439	0.00815224980437905
2008214	3	0.00744221342140345	0.00796144902623279
2008214	4	0.00729482936761228	0.00778800460703273
2008214	5	0.00720781443796714	0.00768162177638662
2008214	6	0.00712973589780284	0.00761210978217013
2008214	7	0.00751344983090501	0.00807214572501294
2008214	8	0.00783206681808114	0.00861879775930316
2008214	9	0.00815442169950777	0.00944065310371144
2008214	10	0.00817688056332834	0.0102180361330587
2008214	11	0.00970039039521396	0.0135537296091378
2008214	12	0.00980457755036747	0.0143378702431565
2008214	13	0.00872252963097022	0.0123997954297734
2008214	14	0.00842653404047448	0.0115936396230409
2008214	15	0.00863281806067128	0.0116973195709028
2008214	16	0.00990653379049913	0.0134003679881438
2008214	17	0.0112059771334645	0.0153477671686806
2008214	18	0.0126744993398358	0.0176126756245705
2008214	19	0.01468633815112	0.0213490989487695
2008214	20	0.0156461920325966	0.02409739475287
2008214	21	0.0150146799773249	0.0250671108203555
2008214	22	0.0206875958825215	0.0465103583763323
2008214	23	0.0453803764306233	0.133471524249737
2008215	0	0.0537040530753418	0.14730000292569
2008215	1	0.0510458540058353	0.113798211804605
2008215	2	0.076665077532991	0.157659363238761
2008215	3	0.148029200749758	0.411408104558036
2008215	4	0.210154560575177	0.647690327738897
2008215	5	0.232769370915046	0.67540937172161
2008215	6	0.249385524580885	0.739091420875511
2008215	7	0.258910415951029	0.882996712655194
2008215	8	0.243695107775775	0.974807120487403
2008215	9	0.226548437429825	0.927602059072154
2008215	10	0.211309162366171	0.890811917983815
2008215	11	0.199845564575921	0.813328471647426
2008215	12	0.199158363430651	0.860036796861826
2008215	13	0.221395344064778	0.944584363343558
2008215	14	0.227353902955626	0.912205759144666
2008215	15	0.220105378182154	0.697377078083214
2008215	16	0.197508418390843	0.505456730268869
2008215	17	0.178936384284825	0.419772987469975
2008215	18	0.166717742667438	0.351642283493652
2008215	19	0.164972174393858	0.311385575858159
2008215	20	0.16749317474004	0.27884092692955
2008215	21	0.167537457939376	0.253436929375505
2008215	22	0.15988691165218	0.237194720667601
2008215	23	0.152495473662986	0.221485370446009
2008216	0	0.142722543486417	0.192588734102279
2008216	1	0.134287167710172	0.173918943290593
2008216	2	0.122848748350569	0.1604588495044
2008216	3	0.106667102883518	0.143090618930004
2008216	4	0.0931621223121055	0.125430310381358
2008216	5	0.0870173598141742	0.11366813490192
2008216	6	0.0913069520063206	0.111708441960748
2008216	7	0.104334787379557	0.12995249457435
2008216	8	0.139729317849063	0.181722882132263
2008216	9	0.158059786736401	0.262087196558912
2008216	10	0.141668399328285	0.273332241040032
2008216	11	0.139647052431965	0.265954129894431
2008216	12	0.0987163386645914	0.213449441356935
2008216	13	0.0740664172401057	0.182530626406063
2008216	14	0.0663317392979916	0.158416099270433
2008216	15	0.0641619037634675	0.132594727894014
2008216	16	0.0634956850460803	0.109683050122656
2008216	17	0.0664908409311628	0.101428204583482
2008216	18	0.0723317813543873	0.0993303240410436
2008216	19	0.067157191692477	0.087777595064066
2008216	20	0.0512701320005067	0.0727930244388353
2008216	21	0.0347479758427033	0.0674140457462487
2008216	22	0.00853878240070456	0.0187771712761309
2008216	23	0.000412779893354492	0.000871800368135871
2008217	0	7.91132905579714e-05	0.000171714494459772
2008217	1	0.000100129818313639	0.000250629827270874
2008217	2	0.000250011628996807	0.000668404874341512
2008217	3	0.00190765501157934	0.00721518241990428
2008217	4	0.011234295454106	0.0570889690290233
2008217	5	0.0257271927676354	0.130426208748322
2008217	6	0.0377792895997986	0.180912863921844
2008217	7	0.0451699833102059	0.203570154006146
2008217	8	0.0468294844202624	0.198706102958356
2008217	9	0.0561367638338435	0.222011597992104
2008217	10	0.0576360032475074	0.229210122816304
2008217	11	0.0391421255407123	0.156408254583771
2008217	12	0.0178172988375668	0.0618918374775012
2008217	13	0.014467859929602	0.0436046703065898
2008217	14	0.0208042351149174	0.0800114807680347
2008217	15	0.0217676060895766	0.073673474826684
2008217	16	0.0623388078049284	0.255066809511714
2008217	17	0.108940009599267	0.522040413428108
2008217	18	0.113454050652249	0.617956178257776
2008217	19	0.120981035793335	0.680542638091782
2008217	20	0.115332336894503	0.603661494149342
2008217	21	0.113413512354809	0.57698707757856
2008217	22	0.113548919736647	0.644307017304859
2008217	23	0.0998702459204769	0.731554209778116
2008218	0	0.100891487783937	0.878962622939747
2008218	1	0.110313533997981	1.10597558736618
2008218	2	0.126739952054154	1.29334864048809
2008218	3	0.135586393165059	1.37330350796522
2008218	4	0.135745831612918	1.21416925941842
2008218	5	0.149052741819502	1.19870992600452
2008218	6	0.190858863411298	1.29261535429149
2008218	7	0.22205452917659	1.33233440764406
2008218	8	0.222869119311857	1.27850254650773
2008218	9	0.21280141049473	1.25010945276298
2008218	10	0.203436085386371	1.10976908758443
2008218	11	0.193014401902305	0.970006194406584
2008218	12	0.184689565366508	0.857139008547059
2008218	13	0.176408406779545	0.711950344402288
2008218	14	0.16355968343405	0.515936462797551
2008218	15	0.154326809676356	0.466390498875705
2008218	16	0.143198219886537	0.497828284710223
2008218	17	0.135631952540225	0.554636051642381
2008218	18	0.129528240575554	0.57860291468131
2008218	19	0.122779964342661	0.574114614913905
2008218	20	0.115719967265973	0.552950582434864
2008218	21	0.105677076237414	0.510002353454116
2008218	22	0.0969569267310313	0.469124286304536
2008218	23	0.0897888079219497	0.43894716264438
2008219	0	0.0866328307840205	0.41622390818299
2008219	1	0.0829084267335207	0.38976411873652
2008219	2	0.0802459592320024	0.362432044936853
2008219	3	0.0755321598878805	0.335014756666861
2008219	4	0.0763597958850137	0.323298636496413
2008219	5	0.0746820756986227	0.300818977895525
2008219	6	0.0738129635051994	0.288636552003666
2008219	7	0.0708127450317745	0.271683659266567
2008219	8	0.0688957612027127	0.267814564229182
2008219	9	0.0682645477741794	0.268017413069802
2008219	10	0.0667395479468681	0.252567410420182
2008219	11	0.0659773222191811	0.246773428305547
2008219	12	0.0620770388351803	0.230973184299328
2008219	13	0.058601972656006	0.214169338108056
2008219	14	0.058755803952135	0.196908573969276
2008219	15	0.059641351939118	0.184818986409547
2008219	16	0.0616495337096465	0.172903000692929
2008219	17	0.0652498494856539	0.159362664128068
2008219	18	0.0669834683374975	0.143276653674665
2008219	19	0.0688932654519548	0.129562203285347
2008219	20	0.0699891355442088	0.117658198011039
2008219	21	0.0700677908336557	0.108884821333317
2008219	22	0.0688845222633021	0.101822527432496
2008219	23	0.0676743247771098	0.0970487376144068
2008220	0	0.0662237393157603	0.0938612391274608
2008220	1	0.0649882186989353	0.0914359754412092
2008220	2	0.0645297354215829	0.0904945684610452
2008220	3	0.0642331084410273	0.0908830594097552
2008220	4	0.064671475549083	0.093600058202278
2008220	5	0.0649806843056916	0.0954903594950731
2008220	6	0.0684460298822954	0.129868454233238
2008220	7	0.0696273189831476	0.151619901098284
2008220	8	0.0650381407378461	0.146487850397382
2008220	9	0.0572703450081466	0.13800995725613
2008220	10	0.0423511520516414	0.104362327726431
2008220	11	0.0304146478530481	0.078317079789429
2008220	12	0.0246975436334967	0.0634905559612526
2008220	13	0.0225451525404982	0.0492490391524051
2008220	14	0.0221388193282591	0.0425285947747063
2008220	15	0.0218545605421552	0.039004124260143
2008220	16	0.0212610144091316	0.037212633007336
2008220	17	0.0205214241617646	0.0325281337989978
2008220	18	0.0150912881651376	0.019586368311038
2008220	19	0.0132684192338873	0.0154452539062081
2008220	20	0.0121185837888222	0.0150686865048448
2008220	21	0.0112749270087394	0.0162274854962975
2008220	22	0.00910615820484389	0.0186427116478957
2008220	23	0.00861490430635462	0.0205924586178675
2008221	0	0.00717437712610087	0.0144856462542479
2008221	1	0.00583634575505667	0.00958710773700881
2008221	2	0.00769483323600155	0.032352137831827
2008221	3	0.0172202353245998	0.0793786985474326
2008221	4	0.0301469757362403	0.128507234390801
2008221	5	0.0487448122216486	0.197868855404307
2008221	6	0.084434743414053	0.360300661331677
2008221	7	0.121390704350292	0.503865475772671
2008221	8	0.141738727335691	0.514671946499279
2008221	9	0.144973236808441	0.446154688617018
2008221	10	0.134998636200025	0.355903032680808
2008221	11	0.113580479399725	0.240480443812432
2008221	12	0.0643424454064726	0.152566812234684
2008221	13	0.0575363391468336	0.130270354601572
2008221	14	0.0831951008121229	0.190423246566784
2008221	15	0.134838925962059	0.285375750024913
2008221	16	0.113242861271	0.287792522167118
2008221	17	0.108081085261192	0.516277885788596
2008221	18	0.117872488773716	0.72157130841569
2008221	19	0.0644781609124343	0.463719696757253
2008221	20	0.0934724424889763	0.857332542383021
2008221	21	0.295903991759692	2.57968041076554
2008221	22	0.622161668555939	4.62460972699181
2008221	23	0.684302779208942	5.23470998280138
2008222	0	0.694502889084827	5.52208175409152
2008222	1	0.763271165398305	5.81576687632599
2008222	2	0.782425135544632	5.76455231822337
2008222	3	0.750819094805253	5.55445985348334
2008222	4	0.723416963602803	5.21457199039931
2008222	5	0.689910808020925	4.62572513281464
2008222	6	0.579982219520678	3.75093767529779
2008222	7	0.478944257290546	2.81643219061601
2008222	8	0.442775776853956	2.53734110978566
2008222	9	0.422330140344955	2.51109657692258
2008222	10	0.390828446477015	2.21140888997099
2008222	11	0.345951088063513	1.97996432759825
2008222	12	0.276955036098611	1.58877316629281
2008222	13	0.247579690614579	1.17660374203662
2008222	14	0.234054229694424	0.951615566121176
2008222	15	0.215279069461545	0.789160416608944
2008222	16	0.186564337174117	0.605875945712771
2008222	17	0.171804341199308	0.456569571192113
2008222	18	0.16714227001657	0.403682851844997
2008222	19	0.178459076122626	0.369228352974395
2008222	20	0.182560848676733	0.32912939617367
2008222	21	0.174195165203526	0.257535967307191
2008222	22	0.130916231850236	0.181270596671555
2008222	23	0.0980507605250365	0.130911877216011
2008223	0	0.0869637153733813	0.11219933302263
2008223	1	0.0812819169831389	0.103393689769958
2008223	2	0.0967504378806503	0.125877225486287
2008223	3	0.15560904825404	0.195841840582994
2008223	4	0.182047147028456	0.224934318872688
2008223	5	0.175873250051824	0.215154034374815
2008223	6	0.154477732309349	0.193062765995354
2008223	7	0.143107769719115	0.180514041758559
2008223	8	0.135690786080626	0.167437791640344
2008223	9	0.13206357366718	0.159170796305991
2008223	10	0.129676776183658	0.152164170744865
2008223	11	0.129798702796631	0.149912477843937
2008223	12	0.128821244342432	0.147294983006098
2008223	13	0.118835097061885	0.138141874678939
2008223	14	0.102627230666314	0.123852661440079
2008223	15	0.0864033039103085	0.109781663302365
2008223	16	0.0725998402212719	0.100454787579311
2008223	17	0.0580522909733731	0.0911391403259579
2008223	18	0.0551840563814851	0.0855991627842815
2008223	19	0.0536188016487213	0.0812639817230559
2008223	20	0.0591729222169314	0.0827787291128015
2008223	21	0.0654765716941734	0.103445343573721
2008223	22	0.0813936226572808	0.388036532934724
2008223	23	0.091742926877094	0.522934134089274
2008224	0	0.0899251480748518	0.493288113295457
2008224	1	0.0866428910146675	0.353805117226302
2008224	2	0.0707200452807954	0.273608301534772
2008224	3	0.0626891469156269	0.228411736660341
2008224	4	0.0626012807587888	0.226945422339305
2008224	5	0.0888277202981262	0.400678343892871
2008224	6	0.110770167691087	0.550468001983685
2008224	7	0.156490403364595	0.880457159076484
2008224	8	0.248495423199204	1.35277762697806
2008224	9	0.29928929441051	1.4942157847196
2008224	10	0.282131783094816	1.35155170736595
2008224	11	0.259093840567202	1.12215152622013
2008224	12	0.237712063803407	0.824781011671117
2008224	13	0.216934343345244	0.586198414040473
2008224	14	0.202518461360162	0.482869088733242
2008224	15	0.196846059967348	0.397070662837391
2008224	16	0.197870218672074	0.346860266362232
2008224	17	0.205500071242363	0.325213788571866
2008224	18	0.210245498767352	0.297385946737434
2008224	19	0.210455985210418	0.263089695921519
2008224	20	0.208251376862353	0.251926924639253
2008224	21	0.202757503988036	0.256844957808817
2008224	22	0.196329862662331	0.269325236092562
2008224	23	0.18563084803401	0.256510650854151
2008225	0	0.158951119957001	0.22623410630596
2008225	1	0.13192130233221	0.183951091475895
2008225	2	0.102758176722751	0.140138242471455
2008225	3	0.0812612200888929	0.111165146375131
2008225	4	0.0691748938645227	0.0991142277978319
2008225	5	0.0616739667123944	0.0936579471438602
2008225	6	0.0490693623219137	0.0911895338601786
2008225	7	0.0464497912719644	0.0817290721680537
2008225	8	0.0451091519372683	0.0692103096345067
2008225	9	0.0426260457055194	0.0606285189110285
2008225	10	0.0388491835341069	0.0517150902560507
2008225	11	0.0363379043408234	0.0474103606695649
2008225	12	0.0279709053440014	0.0362313580013226
2008225	13	0.0262664155136611	0.0382154646065944
2008225	14	0.0111980032529941	0.0193657844660023
2008225	15	0.00611215642219316	0.00982979278792448
2008225	16	0.00616505042409755	0.0137751187034033
2008225	17	0.0264745877756325	0.136389776264394
2008225	18	0.127145835700412	0.493768171457346
2008225	19	0.147882276007232	0.512712779923209
2008225	20	0.107209900821087	0.325252544627167
2008225	21	0.0675059776809708	0.214383203024277
2008225	22	0.0687613504238002	0.160898051173886
2008225	23	0.0860419429281513	0.139433236584723
2008226	0	0.111133531204178	0.145651954517575
2008226	1	0.14848720560889	0.182261333093566
2008226	2	0.221933190671457	0.286860599964345
2008226	3	0.299739694378347	0.40758176326578
2008226	4	0.27528724925759	0.418647922059449
2008226	5	0.155211660254532	0.363480056365155
2008226	6	0.136211607913172	0.551645284638429
2008226	7	0.247568331592315	1.2169935747547
2008226	8	0.401239418136312	1.77952444835234
2008226	9	0.502406778889883	1.58004129711753
2008226	10	0.514160334817144	1.27424777494459
2008226	11	0.476803821175015	1.14885516798022
2008226	12	0.4234669375329	1.17236853522886
2008226	13	0.376500337341999	1.2194183105412
2008226	14	0.359782705654436	1.13157578112259
2008226	15	0.329659487160019	1.05344580247284
2008226	16	0.313502504722684	1.16136792600279
2008226	17	0.327878830362539	1.07260329964566
2008226	18	0.335965747740146	0.986803939756035
2008226	19	0.343034034128986	1.14276291117546
2008226	20	0.422246538629036	1.36841585775639
2008226	21	0.475812851057673	1.33519302392582
2008226	22	0.474862550408348	1.29637203838794
2008226	23	0.485920963703254	1.22672654329597
2008227	0	0.526057599122174	1.30221178503754
2008227	1	0.58251554324505	1.45154714059301
2008227	2	0.524770331868062	1.25811549853018
2008227	3	0.488309429269284	1.49154618262456
2008227	4	0.532625809757054	1.99973594825506
2008227	5	0.582847713607855	2.55730942413063
2008227	6	0.638016610338525	2.94345236886284
2008227	7	0.681823788619836	2.88154081573789
2008227	8	0.694005940137961	2.30315600309975
2008227	9	0.647502383098997	2.694047415667
2008227	10	0.591471584300243	3.07064097489793
2008227	11	0.530708519476778	2.67766334202207
2008227	12	0.481268295618155	2.09295892442402
2008227	13	0.462587240874396	1.72296031913376
2008227	14	0.4401383116376	1.87641229637592
2008227	15	0.40443711528686	1.74405422527897
2008227	16	0.36029772588615	1.3961590224078
2008227	17	0.312723198244311	1.04919477812453
2008227	18	0.28118077205384	0.753186612732666
2008227	19	0.276203726259499	0.558638644059096
2008227	20	0.258957010211694	0.360889279087073
2008227	21	0.250209516484515	0.315715056084574
2008227	22	0.240705106790213	0.298256219520211
2008227	23	0.228818753589923	0.285403029581847
2008228	0	0.223007153504095	0.280361958577851
2008228	1	0.221434278283111	0.274642440943409
2008228	2	0.220371044501915	0.265357577356494
2008228	3	0.2199742991359	0.257434119439073
2008228	4	0.217991346433735	0.250744686797495
2008228	5	0.214745995558161	0.243066565298229
2008228	6	0.210124950432165	0.24215012476207
2008228	7	0.203570401293065	0.258165370116511
2008228	8	0.218788576068465	0.360027395241599
2008228	9	0.220672555546508	0.447813295604609
2008228	10	0.20190516934543	0.57005404911981
2008228	11	0.182248627166316	0.60507295822028
2008228	12	0.165749838575913	0.580846457880061
2008228	13	0.150412252624048	0.545397287174842
2008228	14	0.141928472963752	0.50434126671501
2008228	15	0.134762662298395	0.472228350864674
2008228	16	0.127118509334383	0.436984185573303
2008228	17	0.127010171176974	0.409874634723846
2008228	18	0.142204767850349	0.371410159265694
2008228	19	0.126687811566312	0.232579834228539
2008228	20	0.127784210149621	0.220604799174576
2008228	21	0.12887257428836	0.213383009278406
2008228	22	0.131582342745606	0.214223228083298
2008228	23	0.127960519161575	0.199542017817008
2008229	0	0.123055220845498	0.184766844764493
2008229	1	0.11929001323976	0.175564099114819
2008229	2	0.116173581951624	0.170578237615074
2008229	3	0.113330321993253	0.168401617309502
2008229	4	0.113184573794521	0.16918302475427
2008229	5	0.105435884279258	0.174819927922783
2008229	6	0.11272954004024	0.245293869063611
2008229	7	0.122483070135319	0.318694543021278
2008229	8	0.130702456561253	0.379165384424583
2008229	9	0.128011555424595	0.357935467101718
2008229	10	0.12560564472178	0.349896622825253
2008229	11	0.127145704563948	0.361275186686152
2008229	12	0.129265784760234	0.361386032288631
2008229	13	0.129249836442713	0.341217814474249
2008229	14	0.125126380696765	0.310378691961445
2008229	15	0.121518134748348	0.283567110041455
2008229	16	0.124173546940572	0.291475205274567
2008229	17	0.128516698530435	0.291753833260036
2008229	18	0.13958238502356	0.32265854834334
2008229	19	0.144791798466927	0.309251863476445
2008229	20	0.128532469260256	0.229462204974934
2008229	21	0.123456221682846	0.195597133954613
2008229	22	0.126276359325078	0.188133995297932
2008229	23	0.129879187610575	0.185036890626896
2008230	0	0.126113489168248	0.181646715218822
2008230	1	0.121627421110718	0.186492501454716
2008230	2	0.117579583396833	0.202766063229032
2008230	3	0.115142967418391	0.224647063749629
2008230	4	0.111207586581306	0.251565530469326
2008230	5	0.113562353572872	0.301770686172904
2008230	6	0.139745126510459	0.373636883455545
2008230	7	0.170522062864832	0.401122081479582
2008230	8	0.174386367815904	0.376842241959518
2008230	9	0.158417291840779	0.413992182599365
2008230	10	0.147320737863412	0.387259855975511
2008230	11	0.138436648220769	0.343354560237465
2008230	12	0.133770420762824	0.308961258712395
2008230	13	0.129918362379207	0.287235030681768
2008230	14	0.123363661618215	0.263585900747245
2008230	15	0.114763750407034	0.238100105783199
2008230	16	0.108075558432993	0.21611870160259
2008230	17	0.106850645785379	0.207758605003309
2008230	18	0.103863355351088	0.197353220809617
2008230	19	0.102233464885662	0.197039650365756
2008230	20	0.0999825228304361	0.18847289817547
2008230	21	0.0972977769141474	0.178396309219051
2008230	22	0.0950425669772218	0.169813349629427
2008230	23	0.0933808959239341	0.162783329815708
2008231	0	0.091568655428901	0.157247051113813
2008231	1	0.0859489252461439	0.153637026135313
2008231	2	0.0919135057260267	0.181927523637141
2008231	3	0.0859346734987228	0.172680324596889
2008231	4	0.0868031708834851	0.151869260747385
2008231	5	0.0502918600699564	0.0661238957409708
2008231	6	0.0442017990452809	0.0521136017932967
2008231	7	0.0737126942931855	0.0982061125383428
2008231	8	0.0941247436158983	0.159794418165162
2008231	9	0.111776396366041	0.289884811480799
2008231	10	0.152778625277867	0.519475870287367
2008231	11	0.192682466154911	0.66951810536265
2008231	12	0.200118207543956	0.5587973285234
2008231	13	0.200496773596456	0.479369947401754
2008231	14	0.193642218142608	0.417757916411982
2008231	15	0.192231101614726	0.387286547666756
2008231	16	0.19250490037019	0.36210994782637
2008231	17	0.196878805745087	0.341492360422521
2008231	18	0.207071839443713	0.310775300822841
2008231	19	0.210566503635114	0.255535591422415
2008231	20	0.217430181737782	0.250036302370835
2008231	21	0.235237517524079	0.264915012550428
2008231	22	0.24398666281518	0.269737429230805
2008231	23	0.240156065163079	0.266382297545106
2008232	0	0.237756876265213	0.263554373636129
2008232	1	0.237489734685203	0.262908605990876
2008232	2	0.241872955332248	0.267443634994509
2008232	3	0.24773654894133	0.274425989288787
2008232	4	0.251226806378735	0.278208817547852
2008232	5	0.256257465029977	0.283357002945945
2008232	6	0.263898133260899	0.299014073688336
2008232	7	0.269807272726026	0.304420780780615
2008232	8	0.255806879143523	0.309566396988082
2008232	9	0.184371239457261	0.267860894309731
2008232	10	0.126902122215442	0.18464530168188
2008232	11	0.123635213596066	0.16365456521877
2008232	12	0.12030119687583	0.151535226317595
2008232	13	0.0974778840580581	0.123561238606825
2008232	14	0.0747858169915711	0.106009830431333
2008232	15	0.0788798660853292	0.221274595996464
2008232	16	0.0962294148158936	0.29704808121833
2008232	17	0.118547243779605	0.304075624633843
2008232	18	0.150030838992093	0.33085043660231
2008232	19	0.166897936381983	0.334503148052471
2008232	20	0.183363251826315	0.36654774884266
2008232	21	0.221050443217613	0.472927673707762
2008232	22	0.290459278147653	0.584615332967508
2008232	23	0.299859853677411	0.650845300633356
2008233	0	0.253189303109956	0.735239104088438
2008233	1	0.244214814064027	0.842323041222446
2008233	2	0.284659907755126	0.888069534257833
2008233	3	0.354739114313408	1.00967078201228
2008233	4	0.361754822433262	0.73404870447241
2008233	5	0.289688861332181	0.431860441307418
2008233	6	0.278955610166031	0.458781340701691
2008233	7	0.254674689230924	0.753936906004849
2008233	8	0.197808244997379	0.99476866894533
2008233	9	0.173949676302796	0.797190391088967
2008233	10	0.125153312181648	0.470303890955713
2008233	11	0.0758729765194499	0.252597458930653
2008233	12	0.0667423117646647	0.206105089334677
2008233	13	0.0698308566271656	0.212308049955385
2008233	14	0.0830711671977456	0.247466659890367
2008233	15	0.0872876536273453	0.232061062069364
2008233	16	0.090076327577921	0.213313341628899
2008233	17	0.0832134562200411	0.180061505121755
2008233	18	0.0586682707757006	0.120276112673475
2008233	19	0.0251007024541231	0.0504882623316203
2008233	20	0.0304381141254116	0.0666055366411464
2008233	21	0.0509190092323968	0.137807572919467
2008233	22	0.0692714592383097	0.230739884026379
2008233	23	0.0807241760976341	0.326038905302764
2008234	0	0.0883868480198036	0.344943491670352
2008234	1	0.0838054852752951	0.306464321570373
2008234	2	0.0842562114532614	0.318950953983062
2008234	3	0.102221727333898	0.371091179914015
2008234	4	0.127827978678954	0.460334622589876
2008234	5	0.154989255940588	0.513913340120143
2008234	6	0.183339687927014	0.440360074149347
2008234	7	0.186966658655712	0.312896541066349
2008234	8	0.193990415448116	0.273170113150094
2008234	9	0.211243335828288	0.278998992135297
2008234	10	0.225917050773817	0.292199434532449
2008234	11	0.233487812610788	0.287754183813757
2008234	12	0.238303925255896	0.294578733178676
2008234	13	0.231616316256949	0.345891142143235
2008234	14	0.216816825810009	0.353415300404351
2008234	15	0.20279308390487	0.319169241412849
2008234	16	0.179579062200394	0.266397340135553
2008234	17	0.136128523677392	0.185744543177506
2008234	18	0.0953886469261514	0.127794105892393
2008234	19	0.0845451828518954	0.114294269456782
2008234	20	0.0821661939568479	0.127155133818726
2008234	21	0.0748253540846946	0.13771573483189
2008234	22	0.0704103163767642	0.178763943281451
2008234	23	0.0668827475088828	0.230219350577396
2008235	0	0.0645103577651203	0.231244594965609
2008235	1	0.0666520194460407	0.225667204634229
2008235	2	0.0839430207223818	0.310409919557294
2008235	3	0.0982825261337145	0.355509104663979
2008235	4	0.0972659858548804	0.298684769374196
2008235	5	0.0941533602319991	0.256169075895109
2008235	6	0.0974968720420536	0.283750771940147
2008235	7	0.0998065610259977	0.254599884403161
2008235	8	0.101427086500841	0.187017871877827
2008235	9	0.100219559640956	0.135808542315187
2008235	10	0.118753562451243	0.154228398089175
2008235	11	0.12135610891665	0.190229264230617
2008235	12	0.0888162204595719	0.130602764343
2008235	13	0.0459059136053541	0.0680674212154746
2008235	14	0.0235428693648468	0.0396427453286637
2008235	15	0.0182007511849518	0.0357334305775741
2008235	16	0.018375604952892	0.043856781740615
2008235	17	0.0228835876407994	0.0624775185228933
2008235	18	0.0277826730754206	0.083153019612109
2008235	19	0.0309042869393961	0.0995694377491783
2008235	20	0.0352198584752591	0.116213469113541
2008235	21	0.0362635256236935	0.111205969313483
2008235	22	0.031724575158581	0.103728624317281
2008235	23	0.0253012199511851	0.0989087183932865
2008236	0	0.0331489626694762	0.150608898565379
2008236	1	0.115378760452005	0.439222606479967
2008236	2	0.182517260333362	0.648546345890622
2008236	3	0.181154069913929	0.619424060494315
2008236	4	0.151778631022991	0.586662345389846
2008236	5	0.12804886724175	0.594226995754473
2008236	6	0.127334836485916	0.621258560783568
2008236	7	0.112859810170836	0.511077866150532
2008236	8	0.0773740387831156	0.37976629147057
2008236	9	0.061703940259574	0.45651232694391
2008236	10	0.106196207695824	0.704723043228757
2008236	11	0.0847827557830846	0.500895284854774
2008236	12	0.0489821811031755	0.347115114694525
2008236	13	0.0439575930644704	0.368893968801993
2008236	14	0.0468005351452016	0.391549747778658
2008236	15	0.0505770268445228	0.393165819715843
2008236	16	0.0468659977804329	0.357391197876007
2008236	17	0.06458456810685	0.400450187345755
2008236	18	0.0881366416218754	0.4062266442556
2008236	19	0.0229542750976566	0.133170188520619
2008236	20	0.0114494252263269	0.0726502499484505
2008236	21	0.0616680529517807	0.417704766132155
2008236	22	0.150790134312644	0.843199603771445
2008236	23	0.149796273207402	0.804681312500642
2008237	0	0.11990182324472	0.575562094250397
2008237	1	0.0901445904940942	0.453440816808098
2008237	2	0.0695828125825407	0.38846623669847
2008237	3	0.0546794244673754	0.338054720100217
2008237	4	0.0531784040264703	0.364185613219102
2008237	5	0.0629066396284067	0.381135858113444
2008237	6	0.0857254865375679	0.432834743820948
2008237	7	0.117669025507238	0.539954217748169
2008237	8	0.162537446396079	0.617939013443987
2008237	9	0.182172676009331	0.684558513213994
2008237	10	0.175366694468441	0.754915051542003
2008237	11	0.172682767790815	0.841667468544822
2008237	12	0.159752173498677	0.761724781335038
2008237	13	0.143482906671793	0.684909507544924
2008237	14	0.125784768582507	0.586846928919061
2008237	15	0.104156562170801	0.371730042340616
2008237	16	0.0749264657366636	0.214018776261205
2008237	17	0.0607952914522269	0.169776858221276
2008237	18	0.0576902891955642	0.158894720918963
2008237	19	0.0566323708343105	0.153829247008456
2008237	20	0.0566171849528141	0.148088832507973
2008237	21	0.0558492422508727	0.140023738871946
2008237	22	0.0570200491940961	0.129921007010945
2008237	23	0.0618532392853363	0.125707172737001
2008238	0	0.0736342877013501	0.136317052765075
2008238	1	0.0863012241123912	0.158521697976195
2008238	2	0.0965703074993806	0.206543066760389
2008238	3	0.101553379225673	0.253534600608398
2008238	4	0.103083575835814	0.274722271169558
2008238	5	0.105345054096548	0.282024095453543
2008238	6	0.105767563103222	0.274363059815648
2008238	7	0.0983277920829216	0.258620356159259
2008238	8	0.0915302083694912	0.242396461283249
2008238	9	0.0842722894156177	0.226074899408396
2008238	10	0.0847909615393552	0.222771719118798
2008238	11	0.0888784940842792	0.216231004076016
2008238	12	0.0903474038219398	0.201584601164591
2008238	13	0.0790805328576868	0.15761868296526
2008238	14	0.0542403289804228	0.12234426729873
2008238	15	0.0475536413169207	0.131530191187045
2008238	16	0.0481067453494956	0.139384700827533
2008238	17	0.0482935145615193	0.137501782401203
2008238	18	0.0528943653126081	0.165393428447597
2008238	19	0.0575999957168306	0.178789452318611
2008238	20	0.0663817076853471	0.203940298810831
2008238	21	0.07471825508444	0.20900468825715
2008238	22	0.0884127356180023	0.212862014908859
2008238	23	0.0952130030908696	0.184683324339737
2008239	0	0.0848736095426046	0.138727223331502
2008239	1	0.0765489671259391	0.114807751937922
2008239	2	0.0762785226244684	0.113085071407501
2008239	3	0.0800194754366064	0.120351744178725
2008239	4	0.100409028204261	0.171007230870567
2008239	5	0.130503411760783	0.235726543591095
2008239	6	0.155497127027353	0.287955212357645
2008239	7	0.193938708192677	0.335654644138102
2008239	8	0.238194522246585	0.374880095379123
2008239	9	0.281471649752568	0.387536258014298
2008239	10	0.328814063725161	0.663819176560768
2008239	11	0.283114955009693	1.11454026316292
2008239	12	0.267760909811192	1.10221302258723
2008239	13	0.270381280490416	1.08633786664765
2008239	14	0.269593465931549	1.03596341982795
2008239	15	0.259304473747926	0.918065904592886
2008239	16	0.249300177781556	0.786605506068776
2008239	17	0.245924186846742	0.687952747299169
2008239	18	0.254473480542279	0.624242316201388
2008239	19	0.281438122026969	0.612797200153387
2008239	20	0.299201750749998	0.537685185944894
2008239	21	0.303732415475407	0.474550077713821
2008239	22	0.312738354509376	0.46160282902876
2008239	23	0.319096889790899	0.448959357912246
2008240	0	0.324144353741744	0.443125847136353
2008240	1	0.324701084222776	0.448486903451565
2008240	2	0.317091883955555	0.447222036254203
2008240	3	0.306933178037385	0.444142337530529
2008240	4	0.294759917204134	0.451019482164085
2008240	5	0.293889814164656	0.46765474283765
2008240	6	0.307534286410419	0.487367559354217
2008240	7	0.319818595097322	0.514677233509022
2008240	8	0.348179375331723	0.648043040536884
2008240	9	0.281163330770079	0.570419342940437
2008240	10	0.202127946366722	0.40389839405721
2008240	11	0.164978751945211	0.307242474228433
2008240	12	0.14822158173807	0.268159120609364
2008240	13	0.145310970920101	0.272371114899682
2008240	14	0.143485352142491	0.289129243512005
2008240	15	0.160929099642228	0.300505844806156
2008240	16	0.165639368793961	0.303469381510014
2008240	17	0.165830368456558	0.303681827872652
2008240	18	0.163708219808324	0.340095944581777
2008240	19	0.164317296678136	0.365664691113873
2008240	20	0.152943434611758	0.346125303765451
2008240	21	0.145033906513426	0.325225670065316
2008240	22	0.139866760571899	0.30699766373618
2008240	23	0.127163641222022	0.292212141340955
2008241	0	0.116854715727082	0.283241485028662
2008241	1	0.109296615796382	0.28626033145746
2008241	2	0.109380787234512	0.31275566812339
2008241	3	0.117769167081882	0.332344488721237
2008241	4	0.126459923195659	0.333605850585937
2008241	5	0.154943762450988	0.363483718525349
2008241	6	0.195297194026834	0.393177253470664
2008241	7	0.232755465663498	0.398997907441524
2008241	8	0.265409888419658	0.409902557498339
2008241	9	0.288587302014886	0.434887122245307
2008241	10	0.287409725431509	0.449262054480585
2008241	11	0.279938769573744	0.482219644706479
2008241	12	0.276841055246231	0.517274621109569
2008241	13	0.275905443171733	0.53702407332398
2008241	14	0.277415068818025	0.535090027645546
2008241	15	0.271946075429937	0.511776349695005
2008241	16	0.261782885426736	0.495658224355235
2008241	17	0.245441056554694	0.47101784553569
2008241	18	0.20822433567748	0.454641219875894
2008241	19	0.185424270288635	0.496445501410722
2008241	20	0.1911340527721	0.585527751549446
2008241	21	0.227834571249024	0.793468954962086
2008241	22	0.239863345643497	0.898538570162062
2008241	23	0.255918977834888	0.952595026362828
2008242	0	0.276067467421562	0.919993484895726
2008242	1	0.280792022362295	0.856649626973635
2008242	2	0.321887665821306	0.994899025945946
2008242	3	0.333143901755595	1.19589885540067
2008242	4	0.26981326009286	0.987494300726438
2008242	5	0.13117328896467	0.568937888467203
2008242	6	0.082350565343558	0.423222209856122
2008242	7	0.0713543722307393	0.387393538714075
2008242	8	0.0690631456850511	0.382268097167051
2008242	9	0.0984827958592289	0.534265694917277
2008242	10	0.156485629493582	0.701061652181966
2008242	11	0.185195211610376	0.68781555686131
2008242	12	0.190024845885974	0.621731193649081
2008242	13	0.174079681372717	0.551605258855876
2008242	14	0.151491548799989	0.492098748524866
2008242	15	0.150885301988154	0.48564433227244
2008242	16	0.159935522363195	0.465361599775693
2008242	17	0.163963879471604	0.420358374282917
2008242	18	0.164240969326608	0.360695056507996
2008242	19	0.16563936160677	0.321976841885574
2008242	20	0.163517179137244	0.281747975974767
2008242	21	0.162874028122176	0.262961943755184
2008242	22	0.163019191022497	0.252014086470761
2008242	23	0.162076612487971	0.24239358809911
2008243	0	0.158228030096247	0.229836731593229
2008243	1	0.154691684884473	0.218234468421641
2008243	2	0.150596287581087	0.207191887397952
2008243	3	0.145569030389168	0.195191028153045
2008243	4	0.141391482390827	0.186421964836737
2008243	5	0.138310822012766	0.18053184827174
2008243	6	0.12751383963677	0.175917027326587
2008243	7	0.144840075432097	0.381641331486812
2008243	8	0.178449245471211	0.606425152705503
2008243	9	0.185587662015355	0.652969108390921
2008243	10	0.161755408357636	0.607605683365633
2008243	11	0.145419349777132	0.536544215936193
2008243	12	0.138704265276015	0.476533819127041
2008243	13	0.13151458807715	0.426437515024892
2008243	14	0.127388924935722	0.391969220532563
2008243	15	0.124897763610472	0.366137288120037
2008243	16	0.122052305543911	0.345598293924268
2008243	17	0.118551699836181	0.330303882413934
2008243	18	0.115165065797165	0.320576286431335
2008243	19	0.110503588041172	0.30453078170059
2008243	20	0.104294005585403	0.278919945462358
2008243	21	0.0948337890779602	0.238285651889177
2008243	22	0.0826373887149955	0.191632128486702
2008243	23	0.0715359248835558	0.148423702499981
