# Supplementary material for: A comparison of sea salt emission parameterizations in northwestern Europe using a chemistry transport model setup
Source: Copernicus journal article supplement (doi:10.5194/acp-16-9905-2016), 2016-08-08
Supplement: Supplementary file 2 [file acp-16-9905-2016-supplement.zip › conc/conc.timeseries.values.sum2008.sp13.Na.DE0044R.csv]

doy	hour	pm2.5	pm10
2008183	0	0.0310824179295335	0.0487537912765921
2008183	1	0.030124981948008	0.0463974332368543
2008183	2	0.028980778728227	0.0433009459394261
2008183	3	0.0279281411124032	0.0406343452379161
2008183	4	0.0262064943500829	0.0383411690788567
2008183	5	0.0257307639025836	0.0392845493443641
2008183	6	0.0250821296813268	0.0396508764397492
2008183	7	0.0220586674210382	0.0362675380552797
2008183	8	0.0214215335615254	0.0420925633439596
2008183	9	0.0230694425615215	0.0462999608644432
2008183	10	0.0214081887635153	0.0430682574608231
2008183	11	0.0198354300444339	0.0385922279660129
2008183	12	0.0179598946878321	0.034071361070006
2008183	13	0.0159787382682374	0.0295270233596174
2008183	14	0.0144032827097125	0.0258880584041127
2008183	15	0.0130555396351165	0.0229110216336471
2008183	16	0.0119620042085551	0.0205930029914805
2008183	17	0.0113517497149721	0.0189472314131992
2008183	18	0.0113852612577824	0.0174135372255215
2008183	19	0.0107419824522084	0.0156899215750272
2008183	20	0.0110268121767763	0.0168211924484015
2008183	21	0.0118158198255212	0.0187301188597979
2008183	22	0.0126806887990836	0.0203532305225737
2008183	23	0.0135330382710714	0.0218289308117375
2008184	0	0.0142655305366358	0.0226488229261076
2008184	1	0.0147117707456233	0.0225802498644082
2008184	2	0.0145730474672163	0.0211878204204444
2008184	3	0.014033337239259	0.0191262799196891
2008184	4	0.0134101932893551	0.0175508473682004
2008184	5	0.0123201222555715	0.0161971750429243
2008184	6	0.0106983170271001	0.0144235692309108
2008184	7	0.00972899854503569	0.0133506730580069
2008184	8	0.00944738561964493	0.0132239599643692
2008184	9	0.0103032392052647	0.0150664857880002
2008184	10	0.0104435199838821	0.0150634193670983
2008184	11	0.00996656532963255	0.0140669681464719
2008184	12	0.00925574206938823	0.0127822928968465
2008184	13	0.00868764914421466	0.0117875853369625
2008184	14	0.00811903965823112	0.0108813843166146
2008184	15	0.00755541143311971	0.010049203673019
2008184	16	0.00710031878486668	0.00939161005437105
2008184	17	0.00660078863524464	0.00892859285798223
2008184	18	0.00617790582419606	0.00872084242589248
2008184	19	0.00601939077488871	0.00806542284463968
2008184	20	0.00558448661716036	0.00697255357694087
2008184	21	0.00578807244824373	0.00682628098549673
2008184	22	0.00609689501689874	0.00712682369918005
2008184	23	0.00611716085109481	0.00723463893714776
2008185	0	0.00604725913966297	0.00727411872780007
2008185	1	0.00592398623533214	0.00738224046366488
2008185	2	0.00583013379549657	0.00751531527686388
2008185	3	0.00584417948336546	0.00777040838913251
2008185	4	0.00578727283479683	0.00785637988314451
2008185	5	0.0055670215309339	0.00736903745039515
2008185	6	0.00538641974047622	0.00683811764668518
2008185	7	0.00531004229801943	0.00655252448231217
2008185	8	0.00532853497484782	0.00651022290251684
2008185	9	0.00541659482350866	0.00661956423098744
2008185	10	0.00545295477508551	0.00664165006557713
2008185	11	0.00546213163978739	0.00666181928618243
2008185	12	0.00538768212291033	0.00658017423183252
2008185	13	0.00527649762419659	0.00641448169522843
2008185	14	0.00517498498481928	0.00626144992296675
2008185	15	0.00506410373394292	0.00610255338110769
2008185	16	0.00493130380503958	0.0059665353539049
2008185	17	0.00472631032801275	0.00580721992194566
2008185	18	0.00450100895516752	0.00558295895590545
2008185	19	0.00434171429784583	0.00535563343123523
2008185	20	0.00420129072092568	0.00503400111395964
2008185	21	0.00358886575127745	0.00423208059939333
2008185	22	0.00320141520013802	0.00373247378693158
2008185	23	0.00329693135040206	0.00381776210354419
2008186	0	0.00470345175231379	0.00553214121823282
2008186	1	0.00926153995901552	0.0127852434684908
2008186	2	0.0232046766776505	0.0362337638798905
2008186	3	0.0376412081281994	0.0616157421001871
2008186	4	0.0414957375756419	0.0717390322558537
2008186	5	0.0386195382674239	0.0676328794871584
2008186	6	0.0226185980481063	0.0362390194685668
2008186	7	0.00810529573479253	0.0121088558224197
2008186	8	0.00360294704633979	0.00593075196343848
2008186	9	0.00261279184383753	0.00387238712827865
2008186	10	0.00164437394193922	0.00224313939443908
2008186	11	0.00156289401455219	0.00208555713999954
2008186	12	0.00134916943179694	0.00173809991438799
2008186	13	0.00115775699252882	0.00147281922741606
2008186	14	0.000691755747727614	0.000899259129701326
2008186	15	0.000345767611060744	0.000467566506045017
2008186	16	0.000271924425343871	0.000387148529437491
2008186	17	0.00016767605148051	0.000242606012751723
2008186	18	0.000111613835559839	0.000161551640872281
2008186	19	9.18370028210644e-05	0.000143134572475643
2008186	20	0.000111188995936336	0.000189369405950598
2008186	21	0.000169220811564755	0.000298863086958042
2008186	22	0.000178379061257687	0.000325085053232967
2008186	23	0.000250553797277491	0.000440841666845556
2008187	0	0.000544817396563671	0.00102908602494216
2008187	1	0.00334754805905232	0.00589101874607314
2008187	2	0.0160529123705846	0.0235528432026042
2008187	3	0.0440196075859312	0.0675437004328478
2008187	4	0.0817149184321352	0.131101628973289
2008187	5	0.102274014829595	0.18729472980037
2008187	6	0.101352926424395	0.247513905623978
2008187	7	0.076795930072715	0.200293345328214
2008187	8	0.0697965776909561	0.174400888478579
2008187	9	0.0676821440934034	0.169998794173097
2008187	10	0.0729609051587141	0.175658369518717
2008187	11	0.0807203329677123	0.176708558471829
2008187	12	0.0852562391915471	0.16504861105109
2008187	13	0.0883750465379227	0.154925065731452
2008187	14	0.0934071181406164	0.148253014352633
2008187	15	0.102292682191182	0.152079737136217
2008187	16	0.11312285023655	0.166364518253955
2008187	17	0.117247658854413	0.169641645738283
2008187	18	0.113902465458321	0.160136105080266
2008187	19	0.10378287086457	0.149977740799374
2008187	20	0.0916816503323046	0.143212271335752
2008187	21	0.0825992688120023	0.135539959558175
2008187	22	0.0755951920218422	0.125751203469409
2008187	23	0.0692877153385842	0.115510108736322
2008188	0	0.0642042749118212	0.110191497746222
2008188	1	0.0621267256443384	0.112364383131787
2008188	2	0.0597130496191897	0.107837141209292
2008188	3	0.0581656351766695	0.102315014034985
2008188	4	0.0554941023139203	0.0969117615267497
2008188	5	0.0581317301413827	0.101554752789603
2008188	6	0.0618111302497657	0.102923664650461
2008188	7	0.0616516301098633	0.10390890263984
2008188	8	0.0549930493136567	0.0969878089353607
2008188	9	0.0458635616699192	0.079005954469427
2008188	10	0.0416557321289561	0.0675715148896976
2008188	11	0.039323712008009	0.0623815586292253
2008188	12	0.0447564901778239	0.0638554520560887
2008188	13	0.0442713530314698	0.063211485825823
2008188	14	0.0412509239016199	0.0579396116289732
2008188	15	0.038094424188945	0.053124780310853
2008188	16	0.0334972163447522	0.0459840558433057
2008188	17	0.0304200293703585	0.0414825685831013
2008188	18	0.0340718169554866	0.0475757272092815
2008188	19	0.0618707945862621	0.0835790315958418
2008188	20	0.109163187494829	0.144373166701946
2008188	21	0.148101665479496	0.19637688210805
2008188	22	0.156962715080543	0.193685958342695
2008188	23	0.152478071404251	0.185249502237847
2008189	0	0.145829252011947	0.177608641335606
2008189	1	0.139239218555342	0.170443316416508
2008189	2	0.132474151498083	0.162897600734678
2008189	3	0.126118039435773	0.154969738271087
2008189	4	0.112245904310869	0.146038051722522
2008189	5	0.124512837809479	0.166924282617148
2008189	6	0.166682884881061	0.218734527708009
2008189	7	0.174936144577085	0.236341267205798
2008189	8	0.174143615614757	0.23677821160674
2008189	9	0.183855324834403	0.264519697401835
2008189	10	0.190161150127835	0.284661378574087
2008189	11	0.167213690435531	0.240592774902261
2008189	12	0.130496825603794	0.181994396142621
2008189	13	0.12049783104888	0.167408718511287
2008189	14	0.121081207510624	0.164352306782637
2008189	15	0.122926479326931	0.157127036668583
2008189	16	0.124420536839858	0.163629805105236
2008189	17	0.13165547795886	0.166878365177723
2008189	18	0.137298027197032	0.167238751473595
2008189	19	0.13394361792148	0.161299636308966
2008189	20	0.126133228302032	0.15160344841412
2008189	21	0.117383730023243	0.141823459237484
2008189	22	0.116786060864933	0.175858319215578
2008189	23	0.117066210088229	0.216015062018948
2008190	0	0.121532135262832	0.22153579988722
2008190	1	0.134505778820325	0.350586314439568
2008190	2	0.123691152899317	0.364505405474663
2008190	3	0.121926743123962	0.388149167188792
2008190	4	0.121757841554315	0.351190901435906
2008190	5	0.0951299206003142	0.269432648715463
2008190	6	0.0643377444983264	0.227913653005336
2008190	7	0.0458956906451798	0.188105523843112
2008190	8	0.0381810151412584	0.149840232154326
2008190	9	0.0608528479989772	0.222239495317765
2008190	10	0.158559563461501	0.445116734474805
2008190	11	0.226716763036267	0.499763233863096
2008190	12	0.257310606817081	0.476801871198673
2008190	13	0.260263973655976	0.424852467898695
2008190	14	0.263078580572016	0.419721723058978
2008190	15	0.233137991018167	0.36950479707318
2008190	16	0.158805237943955	0.231153673743837
2008190	17	0.0350417194285222	0.0637706874546158
2008190	18	0.0573009560747161	0.129901219419536
2008190	19	0.0923635705807975	0.198496668969985
2008190	20	0.0779687570951805	0.170974315758582
2008190	21	0.0830926502884796	0.204924722390699
2008190	22	0.18221130131734	0.329984770228435
2008190	23	0.180994420712753	0.288812060769316
2008191	0	0.177449850400374	0.276814857868257
2008191	1	0.177201211143333	0.335047307760429
2008191	2	0.171741580203889	0.332882260347483
2008191	3	0.165395717881102	0.3161887499125
2008191	4	0.18226696399927	0.420974012374444
2008191	5	0.201906812108312	0.492551620803694
2008191	6	0.211493971918474	0.542735103403371
2008191	7	0.222502730656028	0.552745907996842
2008191	8	0.242453814161191	0.570421239116953
2008191	9	0.263691537614024	0.647946358286365
2008191	10	0.254791586102755	0.611028674683683
2008191	11	0.220755044544373	0.53477374352754
2008191	12	0.199443196534738	0.488153836023289
2008191	13	0.195279346604848	0.46149233841947
2008191	14	0.190269409178303	0.39086930307475
2008191	15	0.192156280024144	0.351531652286399
2008191	16	0.18999947604993	0.334811577858831
2008191	17	0.175449479812846	0.314969964675009
2008191	18	0.160567264776302	0.276090380768357
2008191	19	0.14935780094564	0.211952771591502
2008191	20	0.122069872812599	0.15437879310972
2008191	21	0.0348123456195	0.0443998552913533
2008191	22	0.0251886288896821	0.0323968964213891
2008191	23	0.0250574062597484	0.0318678886148714
2008192	0	0.0265206206704269	0.0338609776454268
2008192	1	0.0325928147780943	0.0401961549314954
2008192	2	0.0346554698134631	0.0437791204135019
2008192	3	0.0285735069020552	0.0368585610452654
2008192	4	0.0489166867621947	0.0647006499866223
2008192	5	0.11619543182758	0.148496645538478
2008192	6	0.115956030089017	0.145268924981191
2008192	7	0.104335862481744	0.141729153490515
2008192	8	0.0919767183728903	0.131344131752298
2008192	9	0.089086853120247	0.113957320907379
2008192	10	0.102296557935056	0.116933002383959
2008192	11	0.11188250558761	0.127581074462776
2008192	12	0.115532473409853	0.160035657311222
2008192	13	0.12653197423269	0.22444715203297
2008192	14	0.104916505722532	0.140680743320335
2008192	15	0.0988209143747842	0.120071701941553
2008192	16	0.0974985982088223	0.114273592667809
2008192	17	0.0943631910722101	0.109439794530291
2008192	18	0.0914674349551416	0.107271036932517
2008192	19	0.0888865544460011	0.105075319904758
2008192	20	0.0862349115206241	0.101809047530604
2008192	21	0.0846076697754112	0.0984335138738842
2008192	22	0.0839794552451979	0.0962498286952233
2008192	23	0.0835588804779556	0.0954602580087334
2008193	0	0.0833943695565331	0.0944220245947451
2008193	1	0.0827422478616363	0.0919053050453128
2008193	2	0.0844085934582742	0.0917475858605816
2008193	3	0.0874886208581951	0.092725202601173
2008193	4	0.0878276228026323	0.092785893723953
2008193	5	0.0792160985475674	0.0850443696181808
2008193	6	0.0725458411026806	0.0776878463921945
2008193	7	0.0684574141990285	0.0724937766603159
2008193	8	0.0638980838496945	0.0675547904554671
2008193	9	0.0602683966580673	0.064298575852711
2008193	10	0.0571374770835636	0.0643337376387124
2008193	11	0.053896748545021	0.0645415109828357
2008193	12	0.045003832473325	0.0572528203736351
2008193	13	0.0369406053199494	0.0477365542315163
2008193	14	0.0327165366186988	0.0424078570558302
2008193	15	0.030962357584677	0.039587056999863
2008193	16	0.0299167010354359	0.0371880426193109
2008193	17	0.0289930812242305	0.0351559157483365
2008193	18	0.0277417602616775	0.0328238781912239
2008193	19	0.0260947350507814	0.0306979730573189
2008193	20	0.0227871635167211	0.028091422201584
2008193	21	0.0122065306348742	0.0182437184317762
2008193	22	0.00900786567118416	0.016924023563603
2008193	23	0.0105424818792296	0.0235847677097178
2008194	0	0.0083424865002886	0.0181999878876808
2008194	1	0.00971082218859549	0.0306756455146757
2008194	2	0.0129303183955174	0.0467280441757753
2008194	3	0.013681600351308	0.0383165797330967
2008194	4	0.0128607909071922	0.0276045110706743
2008194	5	0.0130407804581228	0.0239338133564671
2008194	6	0.0129006602108354	0.0223947562407862
2008194	7	0.0124054588163495	0.0214148825789548
2008194	8	0.011666993204873	0.0249313047093793
2008194	9	0.0117732714378743	0.0299681234227573
2008194	10	0.0135086049728079	0.0296485765558677
2008194	11	0.0223210395043689	0.0412939714814818
2008194	12	0.0450691781777813	0.0814422607964011
2008194	13	0.0693238602929081	0.130301214110515
2008194	14	0.0916554065887053	0.161882213920615
2008194	15	0.116101316021147	0.186477369718447
2008194	16	0.141981084246645	0.20647730677693
2008194	17	0.166822611533342	0.235542816298237
2008194	18	0.185552015802248	0.286963940945995
2008194	19	0.192568291234698	0.301137290199103
2008194	20	0.191152133306489	0.267010266058581
2008194	21	0.188143877650285	0.238517539497325
2008194	22	0.186952124301769	0.216483879078898
2008194	23	0.175966242103503	0.196565075677047
2008195	0	0.14386788858957	0.163168427793551
2008195	1	0.109421692989059	0.127224267046287
2008195	2	0.0859623021186382	0.101724295728472
2008195	3	0.0770257141179959	0.0911347518279658
2008195	4	0.0769650939023471	0.0917518263815776
2008195	5	0.0694640122695872	0.0858249473483284
2008195	6	0.0591844141203819	0.0752449614579269
2008195	7	0.0854497029472302	0.109381112550782
2008195	8	0.119526377457344	0.155750926669094
2008195	9	0.131304002460914	0.17348444529894
2008195	10	0.132103220702091	0.180074715977349
2008195	11	0.120030162627402	0.166472486022284
2008195	12	0.113994788152677	0.160343830962452
2008195	13	0.112826810280909	0.162293918542373
2008195	14	0.111676866439719	0.163901530888748
2008195	15	0.100096088878943	0.147821540808024
2008195	16	0.0831831990295925	0.119789388191395
2008195	17	0.0677530006016681	0.0978213345642685
2008195	18	0.0589128724419943	0.0843097140821518
2008195	19	0.0521771706193927	0.0753013733211376
2008195	20	0.0544243638236702	0.0790545515342101
2008195	21	0.0606479215907006	0.0953986452256122
2008195	22	0.0703228941934101	0.107702231278161
2008195	23	0.0622383928950685	0.0841722591780743
2008196	0	0.0418754436274139	0.0552160231975312
2008196	1	0.0356412535510662	0.0462866568990522
2008196	2	0.0345072777841602	0.0450801925415823
2008196	3	0.0342291909736687	0.0451551923812176
2008196	4	0.0333228135809496	0.0455676489905965
2008196	5	0.0367433305297849	0.0610967819366787
2008196	6	0.0457806817715984	0.080185771819627
2008196	7	0.0687861868295663	0.130113119648325
2008196	8	0.138585984442796	0.376501654189496
2008196	9	0.159481654770993	0.509104895315984
2008196	10	0.148580272148425	0.53163601966634
2008196	11	0.137028647670634	0.486048482911764
2008196	12	0.130585883415625	0.429026766345906
2008196	13	0.135928652702106	0.394349214352957
2008196	14	0.136705789413856	0.348498218805859
2008196	15	0.12625752277788	0.287744972657843
2008196	16	0.118990057253418	0.242817193905291
2008196	17	0.116683770918196	0.217793171170022
2008196	18	0.112966943760603	0.175653182272073
2008196	19	0.103948624563953	0.131299447891326
2008196	20	0.094292885149251	0.108639239874643
2008196	21	0.0865531610675619	0.0986523690242669
2008196	22	0.0804275448875374	0.0926697687569526
2008196	23	0.073965367382994	0.0861438098622154
2008197	0	0.0663200904104775	0.0787933304048316
2008197	1	0.0584872092643795	0.0735647863189591
2008197	2	0.0549435181241026	0.0713961765258787
2008197	3	0.0525316105944266	0.0699044685683665
2008197	4	0.0578491233512362	0.0808953891135628
2008197	5	0.0744527610989764	0.142956851357335
2008197	6	0.0854255809856238	0.265389538518896
2008197	7	0.178400919213132	0.603115475917761
2008197	8	0.193653563506743	0.485670031675488
2008197	9	0.173263477383038	0.364632763602605
2008197	10	0.168862763885181	0.357109101443835
2008197	11	0.190171163662534	0.479183248057757
2008197	12	0.211156279944027	0.534591963967694
2008197	13	0.165448090375872	0.350647343463483
2008197	14	0.138650357612825	0.262513850040704
2008197	15	0.130301649759223	0.235647223726526
2008197	16	0.125644629058216	0.221334241057409
2008197	17	0.121689631545357	0.211015422169825
2008197	18	0.117436466608015	0.20340332716748
2008197	19	0.110534725578347	0.193282260920858
2008197	20	0.100738142162096	0.179469326554691
2008197	21	0.0890974330919634	0.164154956386138
2008197	22	0.0775896084800839	0.146296108227285
2008197	23	0.068196873080518	0.126338536845518
2008198	0	0.0628844237354761	0.115147089881238
2008198	1	0.0576628422820134	0.108137169386332
2008198	2	0.0494012400931006	0.0929847137455044
2008198	3	0.0388472590303763	0.0707544444317772
2008198	4	0.03088429115094	0.0525094765921367
2008198	5	0.026295252901712	0.0428096912390558
2008198	6	0.0056389948861578	0.00948499308760712
2008198	7	0.00415944679346541	0.00700733245138831
2008198	8	0.0244896315208373	0.0383556523019259
2008198	9	0.0324985690585249	0.0527318468713319
2008198	10	0.0314939268731328	0.0578955202606872
2008198	11	0.0324366148817049	0.0583530987356135
2008198	12	0.0344362047596751	0.0606621923824507
2008198	13	0.0319964807587928	0.0556613730254581
2008198	14	0.0247286201143594	0.0422498890082946
2008198	15	0.0228677690115833	0.0391489598034024
2008198	16	0.0303782706374853	0.0570269704931673
2008198	17	0.0264715210276587	0.0555460986260097
2008198	18	0.0224380789363202	0.0492857414046295
2008198	19	0.0256646098831014	0.0608410609181185
2008198	20	0.0512266371811336	0.128410839067017
2008198	21	0.0828771782016491	0.190528165689618
2008198	22	0.0953328420836009	0.213238251631409
2008198	23	0.0970762897637017	0.201547007763202
2008199	0	0.0997711430316151	0.189507324542864
2008199	1	0.110441581249226	0.197755309334176
2008199	2	0.127118665296538	0.225520755308625
2008199	3	0.143274662522666	0.262437814899746
2008199	4	0.176242723431553	0.325107168165482
2008199	5	0.241466603897697	0.458953672893357
2008199	6	0.297871606597158	0.617166764305668
2008199	7	0.29391184024565	0.603098283409205
2008199	8	0.263842946149825	0.541567271110882
2008199	9	0.225292492747934	0.446126380204901
2008199	10	0.196953561521649	0.410855232795047
2008199	11	0.183754051898185	0.422211961511933
2008199	12	0.183143275790327	0.413332207367937
2008199	13	0.176400963736591	0.375661738216062
2008199	14	0.168494331959062	0.327976426125339
2008199	15	0.157498151521646	0.284443971455489
2008199	16	0.146042578808903	0.241600638616402
2008199	17	0.136200714645371	0.207965185443406
2008199	18	0.128617568200527	0.177739291418521
2008199	19	0.115915049655478	0.143893183233365
2008199	20	0.108881875656157	0.131294175284868
2008199	21	0.105343196076029	0.127498493839699
2008199	22	0.103486235426413	0.122552643399801
2008199	23	0.0940927423722184	0.111568981511003
2008200	0	0.0826337321204242	0.101380120108651
2008200	1	0.0754943314604669	0.0949488796606927
2008200	2	0.069027427877599	0.0897795611027512
2008200	3	0.0651662752714169	0.0875697765330026
2008200	4	0.064180542892675	0.088738512120994
2008200	5	0.0642377504479299	0.0934361403456768
2008200	6	0.0693341017649993	0.110564827461814
2008200	7	0.0899673966247415	0.187176596207782
2008200	8	0.0985605890546455	0.226916769559874
2008200	9	0.0882271416909099	0.163672421515801
2008200	10	0.0802914962425849	0.120664144725366
2008200	11	0.0810286003493979	0.106909289151715
2008200	12	0.0832887308197029	0.104194889664163
2008200	13	0.0760569041757996	0.094303370126052
2008200	14	0.0618446892191358	0.079614032349042
2008200	15	0.0402363411080614	0.0556008513518924
2008200	16	0.0331421177772541	0.04838298297382
2008200	17	0.0311554511762596	0.0456404212850973
2008200	18	0.0270644799898577	0.0397122820576116
2008200	19	0.0223412459563779	0.0336514644404989
2008200	20	0.0225235738705494	0.0401506144876906
2008200	21	0.0304996558687267	0.0657510412962717
2008200	22	0.0503281217923159	0.116931469404744
2008200	23	0.075029068430449	0.176856597224198
2008201	0	0.0912092399360023	0.206396009966368
2008201	1	0.100223020477792	0.2088723588989
2008201	2	0.100665174107993	0.191070807532122
2008201	3	0.0917647288664925	0.162195182917467
2008201	4	0.0735360833699772	0.113926334648263
2008201	5	0.0607697904045452	0.0853171395857497
2008201	6	0.0524097518598215	0.066998660665476
2008201	7	0.0782369794707756	0.0946192695136987
2008201	8	0.100852571708246	0.125118564311568
2008201	9	0.0918315917898286	0.117417970653825
2008201	10	0.0795944850490489	0.101106231369077
2008201	11	0.069494620521626	0.0957182070559483
2008201	12	0.0665041208036389	0.103928939302986
2008201	13	0.067231072867	0.118296387950336
2008201	14	0.0564859224222146	0.090864609486755
2008201	15	0.0281638967112596	0.0452077122271848
2008201	16	0.0533154028518556	0.0889130253160518
2008201	17	0.0786560304193412	0.156606828713695
2008201	18	0.0849579340661918	0.139012190022579
2008201	19	0.0878504566601738	0.125607123186394
2008201	20	0.0838937669952744	0.10947689980345
2008201	21	0.0700710449020837	0.089498180570418
2008201	22	0.0452653977408998	0.0668814254019899
2008201	23	0.0384215036046985	0.0797653866916552
2008202	0	0.0471883902926828	0.152339605235451
2008202	1	0.0842058609873455	0.315121033124325
2008202	2	0.146105787577446	0.455302099797251
2008202	3	0.161026587758908	0.419065189564726
2008202	4	0.129460034886019	0.312451035117503
2008202	5	0.0884618269359276	0.253564663401168
2008202	6	0.0805564117368704	0.237185505083621
2008202	7	0.0875234684966719	0.331432843417024
2008202	8	0.0917403094529571	0.320741792580644
2008202	9	0.0909564117680374	0.292335526707571
2008202	10	0.0854135808631942	0.262625457577143
2008202	11	0.0773038051870768	0.20966746269337
2008202	12	0.0733234865505186	0.165677569842562
2008202	13	0.0727556700247011	0.141367777418584
2008202	14	0.0786026918587342	0.148060700328226
2008202	15	0.0912685666499884	0.199769204225362
2008202	16	0.09132520975745	0.190389545510293
2008202	17	0.0861925087424616	0.164879173305598
2008202	18	0.0850135906332495	0.149713531017559
2008202	19	0.0836802697579199	0.117721849164531
2008202	20	0.0811222437569074	0.0981379175719274
2008202	21	0.100007326855437	0.130776459455245
2008202	22	0.143870858622674	0.215378677260718
2008202	23	0.155296614835711	0.246643019309399
2008203	0	0.150448905030804	0.231451854550303
2008203	1	0.13455948854072	0.206221108153648
2008203	2	0.134216046860332	0.211226695452948
2008203	3	0.136791578200054	0.222153717116648
2008203	4	0.136670802942532	0.216584940974161
2008203	5	0.144709715248466	0.27264224541318
2008203	6	0.187628101429498	0.541556250651544
2008203	7	0.279674203660529	1.06107098294804
2008203	8	0.40614397436373	1.97055012981883
2008203	9	0.551404464443401	3.24617074328152
2008203	10	0.533293822237712	2.57304994094008
2008203	11	0.454241237875728	1.92646311335635
2008203	12	0.315993645675602	1.21684565021906
2008203	13	0.133436262369817	0.438123921040122
2008203	14	0.139922870770859	0.406138883801048
2008203	15	0.139183105371704	0.390280679393361
2008203	16	0.0526471754296611	0.189805941385909
2008203	17	0.0113700101882933	0.0453132151086178
2008203	18	0.0176281756522627	0.0773008555206915
2008203	19	0.0777793275871972	0.305075618941593
2008203	20	0.109156366662185	0.51261401152494
2008203	21	0.114599887645734	0.464952222969013
2008203	22	0.121524948848639	0.411830504724993
2008203	23	0.082837114100065	0.262145549853546
2008204	0	0.00247008618007184	0.00648811795413548
2008204	1	0.0116406415355085	0.0483821541151507
2008204	2	0.0422695824288946	0.203552594714319
2008204	3	0.0530318949074577	0.309456001471049
2008204	4	0.0501912372656611	0.248585661420895
2008204	5	0.0409243950870541	0.27249093936655
2008204	6	0.0351083943479652	0.252898979371197
2008204	7	0.0376799881337271	0.222243913701695
2008204	8	0.0496791142605595	0.249501381257035
2008204	9	0.0670472323292626	0.295811267342796
2008204	10	0.0897644143446872	0.386888622187504
2008204	11	0.0974432286800614	0.434833797945178
2008204	12	0.0931070248078478	0.381051788854771
2008204	13	0.084576367757882	0.291677179606206
2008204	14	0.0732863443521084	0.246929164658536
2008204	15	0.0665109756901715	0.218535901345351
2008204	16	0.0633394997256368	0.178354701476391
2008204	17	0.0629262530104927	0.149748647013911
2008204	18	0.0669954388314005	0.13132330373625
2008204	19	0.0642761117995065	0.0928304364821978
2008204	20	0.0634563798384224	0.0861260702379392
2008204	21	0.083971340935425	0.110136592597716
2008204	22	0.184131775886334	0.239580168868841
2008204	23	0.314739426570462	0.417099075293109
2008205	0	0.362769421665364	0.483343053859906
2008205	1	0.363730952517104	0.480794109078017
2008205	2	0.360244903419976	0.462720868233533
2008205	3	0.35688601244094	0.448336794234103
2008205	4	0.349312782551848	0.436557370500889
2008205	5	0.344721883977167	0.423813600555211
2008205	6	0.33221637002419	0.412165094395869
2008205	7	0.319334940343172	0.404660040103176
2008205	8	0.30728140226646	0.407807415838101
2008205	9	0.270625358895906	0.382669444162159
2008205	10	0.245342278492367	0.345772124589428
2008205	11	0.221817160020692	0.326155370303872
2008205	12	0.214472118374725	0.31403528333118
2008205	13	0.20936533602354	0.300718740640055
2008205	14	0.202905047290074	0.291337349682125
2008205	15	0.195813899239788	0.281709869650919
2008205	16	0.182665953218441	0.268454559379669
2008205	17	0.170650247499528	0.254709240565917
2008205	18	0.163148698068928	0.232162787574563
2008205	19	0.155260556991261	0.206173575639462
2008205	20	0.149882031421865	0.20077571823559
2008205	21	0.138747868388944	0.182182551393654
2008205	22	0.146062477377512	0.174237794577446
2008205	23	0.192867936010975	0.221206725131764
2008206	0	0.194242494405592	0.227213148346889
2008206	1	0.178038529583874	0.210784439708974
2008206	2	0.143825448053639	0.17794530288127
2008206	3	0.111916985094346	0.147993636932532
2008206	4	0.0921727018646721	0.12853170220418
2008206	5	0.071670707719169	0.102489960635268
2008206	6	0.0627866572273995	0.0918441090543769
2008206	7	0.0608727299763969	0.0960371519356433
2008206	8	0.060895791981216	0.0953159114516713
2008206	9	0.0658539777967597	0.099481971867203
2008206	10	0.069963355685891	0.105372937231925
2008206	11	0.0767606898506642	0.112186891319926
2008206	12	0.0771871108870543	0.109170771631005
2008206	13	0.0723885642212466	0.100272145134633
2008206	14	0.066773946309551	0.0911602543833037
2008206	15	0.0650197535301178	0.0855600220826511
2008206	16	0.06673846070789	0.0829755725959598
2008206	17	0.06917981457832	0.0792039432338307
2008206	18	0.0760497359333797	0.0828871946320176
2008206	19	0.0905908451275582	0.0982620578577955
2008206	20	0.0995037896835317	0.109276651411264
2008206	21	0.101112709222618	0.110915505156031
2008206	22	0.100363796994734	0.109790737995109
2008206	23	0.103394014390161	0.112592047601059
2008207	0	0.105931348594675	0.114088521709837
2008207	1	0.0995411910496376	0.107124103594335
2008207	2	0.0859542792476691	0.0925841494566855
2008207	3	0.0623465249363415	0.0696651320922583
2008207	4	0.0498784443196778	0.0575633020301046
2008207	5	0.0565908798631908	0.064669633483631
2008207	6	0.0724530921120923	0.0810566897739619
2008207	7	0.0958360450753685	0.102877173581971
2008207	8	0.121389727644242	0.128152154846917
2008207	9	0.136421194920503	0.142071172882096
2008207	10	0.128907374488783	0.133323012935795
2008207	11	0.0952782220917597	0.0983693862310885
2008207	12	0.0635907755137212	0.0663439847431262
2008207	13	0.0446674726118493	0.0470907204137359
2008207	14	0.0322994666909218	0.0341182684065284
2008207	15	0.0238354676826354	0.0252401035015944
2008207	16	0.0185931578490007	0.0198127209180005
2008207	17	0.0154997981079414	0.0165846194116541
2008207	18	0.0137603602436899	0.0147173446495913
2008207	19	0.0129970352572499	0.0138820591894111
2008207	20	0.0128989053668844	0.0137440247902429
2008207	21	0.0144273360039766	0.0152820465226015
2008207	22	0.0162335842397743	0.0171781810368635
2008207	23	0.0169064922632138	0.0179123574192142
2008208	0	0.0182402870465979	0.0193626943736512
2008208	1	0.0202881087267076	0.02163962097925
2008208	2	0.0223953072464033	0.0239689173435802
2008208	3	0.0237669077740254	0.0254534278370203
2008208	4	0.0244813980292416	0.0261289407086082
2008208	5	0.0245158767965377	0.0260447092202752
2008208	6	0.0233398972806352	0.0248628599678468
2008208	7	0.0214126898220437	0.0227615325542201
2008208	8	0.0199326620757398	0.0210885325906391
2008208	9	0.0192571914788446	0.0203034220554447
2008208	10	0.0166116001036727	0.0175559007199419
2008208	11	0.0165076007166912	0.0176261033963951
2008208	12	0.0167837584378687	0.0180333184949382
2008208	13	0.0169977375658462	0.0184181392595057
2008208	14	0.0169343852304082	0.0183855969747085
2008208	15	0.016118920199008	0.0175764030919795
2008208	16	0.0148606714956456	0.0162565907376322
2008208	17	0.0136992176753473	0.0149542321416091
2008208	18	0.0130279759365016	0.0141522407464266
2008208	19	0.0134680441902701	0.0147106105061
2008208	20	0.0150503145482062	0.0165470423718964
2008208	21	0.019653173337379	0.0213424243022785
2008208	22	0.0263316604257553	0.0278898901660315
2008208	23	0.0275144779877756	0.0285968950040498
2008209	0	0.0275651054501643	0.0284725436991427
2008209	1	0.0274544265913726	0.0282688902418806
2008209	2	0.0271636195958027	0.0279855011702328
2008209	3	0.0264506368109118	0.0272724339369912
2008209	4	0.0254500827086008	0.0261561656543873
2008209	5	0.0248000386702557	0.0254512871758089
2008209	6	0.0251598015585775	0.0257765534365948
2008209	7	0.0257965641400255	0.0263747349425822
2008209	8	0.0257947889222095	0.0263694104233253
2008209	9	0.0252221615664517	0.0258930378951734
2008209	10	0.0249337001048677	0.0259270917335767
2008209	11	0.0250580660908805	0.026187009901598
2008209	12	0.0251084120103881	0.0259927920438293
2008209	13	0.0246718540243058	0.0254996504489155
2008209	14	0.0244605866966211	0.0252419938424898
2008209	15	0.0243756956153218	0.0251198496508509
2008209	16	0.0238229763250195	0.0245835092656251
2008209	17	0.0235573728250761	0.0243206331829013
2008209	18	0.0234376688127912	0.0241968634541414
2008209	19	0.0232030342392568	0.0239665175171882
2008209	20	0.0228928218558234	0.0236696059226306
2008209	21	0.0210660073817618	0.0217519349335414
2008209	22	0.0172228029171167	0.0177156963893854
2008209	23	0.0150430291731452	0.015436377986298
2008210	0	0.0147706651591384	0.0151517768922859
2008210	1	0.01482830814781	0.0152258998600138
2008210	2	0.0152160385358508	0.0156073356174448
2008210	3	0.0155075179691665	0.0158694116237774
2008210	4	0.0157042906013664	0.0160541780647623
2008210	5	0.0157594556881787	0.0161128922475315
2008210	6	0.0157038766305507	0.0160128831910196
2008210	7	0.0159226736783055	0.01624060530486
2008210	8	0.0162034117127446	0.0166222307532885
2008210	9	0.0166067692329756	0.0172222629778705
2008210	10	0.017062027013092	0.0179375748724635
2008210	11	0.0161396406950169	0.0170931523033923
2008210	12	0.0155369911832281	0.0166619153256157
2008210	13	0.0153767470467901	0.0172615908575082
2008210	14	0.0158250216097572	0.0183309823607925
2008210	15	0.0171804567830154	0.0197403829344177
2008210	16	0.0199425942810948	0.0223995773139798
2008210	17	0.0240942458618164	0.0263982097693537
2008210	18	0.0288927082852793	0.0310217046915312
2008210	19	0.0332516896241457	0.035282015839146
2008210	20	0.0361366725801545	0.0381982400050607
2008210	21	0.036583535179156	0.0385855657961084
2008210	22	0.0364047938420691	0.0383103564749525
2008210	23	0.0351546369539214	0.0368622078041431
2008211	0	0.0309346517718133	0.0322697076720192
2008211	1	0.0251307130008216	0.0260348036584176
2008211	2	0.0209538746839538	0.0217418026251279
2008211	3	0.0197993250180159	0.0205319199672586
2008211	4	0.0190485538333713	0.019872311208928
2008211	5	0.0183417581458059	0.0191063032976145
2008211	6	0.0178445206913917	0.0184878014316131
2008211	7	0.0170750953703582	0.0176662423031231
2008211	8	0.017681051074363	0.0184751879941945
2008211	9	0.0190996113548781	0.0202174344900099
2008211	10	0.0199612282243355	0.0215173748343465
2008211	11	0.0189649535142838	0.0207125561807448
2008211	12	0.0183740033917757	0.0203063137267484
2008211	13	0.0181199874940745	0.0201125963417405
2008211	14	0.0178910981603729	0.0199889864868491
2008211	15	0.0177105183711075	0.0199652964725516
2008211	16	0.0177459209911036	0.0202048047390333
2008211	17	0.0175968596110591	0.0198654828194246
2008211	18	0.0171543137746477	0.0187098942387733
2008211	19	0.0167748334994243	0.0179090531014814
2008211	20	0.0161150890177915	0.0170930439980361
2008211	21	0.0152730405568491	0.0162159305106048
2008211	22	0.0147901419644647	0.0156920752024407
2008211	23	0.014467224740162	0.0153404686870981
2008212	0	0.0140768250207189	0.0149269715955778
2008212	1	0.0137766433740347	0.0146163992166153
2008212	2	0.0136444177236983	0.0145052360357954
2008212	3	0.0133553969203483	0.0141892544925481
2008212	4	0.0130192517109906	0.0137933158852953
2008212	5	0.0126582393375867	0.0133951130214263
2008212	6	0.0122822298355273	0.0129486837193716
2008212	7	0.0120070306276503	0.0126843020127678
2008212	8	0.01192055827799	0.0127541638424179
2008212	9	0.0137150535306111	0.0149320757724021
2008212	10	0.0152072254798317	0.0167311736282246
2008212	11	0.0160041870829973	0.0177128651174972
2008212	12	0.0161943143483867	0.0178352266653142
2008212	13	0.01571127414986	0.0172769374681593
2008212	14	0.0152051819945666	0.0167271676213091
2008212	15	0.0145348762827299	0.016012542350779
2008212	16	0.0138594042760822	0.0153169143711516
2008212	17	0.0133510510781359	0.0148025152612964
2008212	18	0.0130605438631294	0.0144807465597293
2008212	19	0.0129165367304505	0.0141817639567646
2008212	20	0.0133376794004419	0.0144612393489409
2008212	21	0.0140662573707849	0.0151371582398267
2008212	22	0.0146230359278356	0.0157383121686217
2008212	23	0.0147612888893109	0.0158648356767165
2008213	0	0.0146849230061596	0.0158178974544519
2008213	1	0.0145860090074348	0.0157515177881169
2008213	2	0.0144069931655079	0.0156122760873171
2008213	3	0.0140800593767203	0.0151992126257702
2008213	4	0.013151187042206	0.0140761562252733
2008213	5	0.011964876990416	0.0127118849085922
2008213	6	0.0108511776735318	0.0115088806139931
2008213	7	0.010710532779273	0.0114312348412314
2008213	8	0.0103949362867884	0.011176335860377
2008213	9	0.0110168583909824	0.0120852290972885
2008213	10	0.0119831031437789	0.0132182839178375
2008213	11	0.0122327648017028	0.0135357784720465
2008213	12	0.012392940708838	0.0137764867692048
2008213	13	0.0125119128577318	0.0139278389450611
2008213	14	0.012256551671725	0.0137600596615269
2008213	15	0.0120108196372717	0.0137078171491489
2008213	16	0.0117730978606227	0.0135489946980704
2008213	17	0.0115285862056253	0.0130518495490281
2008213	18	0.0112150355476934	0.0123127443972329
2008213	19	0.0107450746765393	0.0115504957733125
2008213	20	0.0102589715112977	0.010897447915406
2008213	21	0.00975591596422021	0.0103312760227426
2008213	22	0.00934614269851021	0.00992358056418249
2008213	23	0.00925253799936323	0.00984167412232267
2008214	0	0.00921769698222055	0.00981814277436568
2008214	1	0.00927354976330374	0.009902568319244
2008214	2	0.00935932669253987	0.010061610320425
2008214	3	0.00935815911278848	0.0101454194307474
2008214	4	0.00934060150645128	0.0102387162502406
2008214	5	0.00921962627895136	0.0102871078052536
2008214	6	0.00897630768032942	0.0102907034098826
2008214	7	0.00878069098204149	0.0102135458401989
2008214	8	0.00832696794061865	0.00971036290630091
2008214	9	0.00791778814843877	0.00939602004560981
2008214	10	0.00783766494371498	0.00951578988587081
2008214	11	0.00789163468454933	0.00975261387164178
2008214	12	0.00873657992224799	0.0114163387070593
2008214	13	0.00883393526834332	0.0117792071506674
2008214	14	0.00876290088207408	0.0119217600983518
2008214	15	0.008661129673368	0.0121422819911921
2008214	16	0.00839871249385147	0.0120446939842438
2008214	17	0.00807219717638236	0.0118656405417927
2008214	18	0.00778124590646932	0.0115449993347546
2008214	19	0.00739749049318094	0.0106307356153121
2008214	20	0.00718583713561677	0.0101344429665014
2008214	21	0.0069537321867021	0.00971617220802146
2008214	22	0.00696597526699487	0.00969839282842612
2008214	23	0.00753515669819857	0.0104823832894581
2008215	0	0.0111356194807704	0.0159329875795418
2008215	1	0.014641195842502	0.0216263183841459
2008215	2	0.0150101848351989	0.0235986374023218
2008215	3	0.0164628242965312	0.0281248766396701
2008215	4	0.0289268288303256	0.0570011998553035
2008215	5	0.0358706696759575	0.0745933954506615
2008215	6	0.0366162141117796	0.0695245567231417
2008215	7	0.0713689780972022	0.120357222945722
2008215	8	0.140829310390407	0.28613569469193
2008215	9	0.204758757897092	0.509276031227911
2008215	10	0.211699376092041	0.550537074224636
2008215	11	0.194054635838604	0.475425670832884
2008215	12	0.17714929459359	0.423290099439505
2008215	13	0.157431598930706	0.363086081505268
2008215	14	0.142767781002695	0.308942801251408
2008215	15	0.14578701263119	0.3325663847324
2008215	16	0.164750790714804	0.380730101049895
2008215	17	0.187946533265175	0.38458054782244
2008215	18	0.201774199156098	0.35959967201128
2008215	19	0.200451048861543	0.269325192538933
2008215	20	0.190485722709566	0.221485338217477
2008215	21	0.186076941341321	0.213844448180865
2008215	22	0.180104778349267	0.204404586024462
2008215	23	0.173291253903307	0.193207040139683
2008216	0	0.172239209594728	0.194530734973794
2008216	1	0.168838295931083	0.192665073782289
2008216	2	0.159539947565164	0.181354443972944
2008216	3	0.141444099942723	0.162118279440866
2008216	4	0.121445654689282	0.141815265855121
2008216	5	0.12348717564483	0.139729695549513
2008216	6	0.128610592734763	0.143062741455848
2008216	7	0.116198422841435	0.12802361637815
2008216	8	0.117104759795499	0.164636631084742
2008216	9	0.123434171443796	0.201216844660617
2008216	10	0.138363138157164	0.243096884252443
2008216	11	0.166525107759244	0.279400735121121
2008216	12	0.163794691953369	0.241372928329307
2008216	13	0.155549991647637	0.224857529497058
2008216	14	0.148023279385097	0.217879879876181
2008216	15	0.141359417760414	0.2058085565576
2008216	16	0.136198985281267	0.189746528223087
2008216	17	0.130162914837743	0.171560960573012
2008216	18	0.117466825119535	0.147463548097848
2008216	19	0.101354706137716	0.122029872858702
2008216	20	0.0783289909749667	0.092763519877251
2008216	21	0.0576218868711487	0.0693077999428751
2008216	22	0.0559866658211299	0.0746519365242272
2008216	23	0.0530754325803626	0.0637096145545508
2008217	0	0.0494375666917403	0.0550406709201383
2008217	1	0.0495118541370431	0.0555422115736936
2008217	2	0.0560560207736197	0.0619096227325772
2008217	3	0.0632148145226301	0.0687513963459709
2008217	4	0.0906312394666518	0.0968925270004272
2008217	5	0.103051229988502	0.125293981521362
2008217	6	0.0485319020818781	0.0955881888703213
2008217	7	0.00288381343676599	0.00575866358135631
2008217	8	0.00253009395932417	0.00688124162379902
2008217	9	0.00975401556156695	0.0264167033828075
2008217	10	0.0115697548967988	0.0295061128742275
2008217	11	0.0113473409867278	0.0276107105940775
2008217	12	0.0118932894670821	0.0276619330768267
2008217	13	0.0106670808206658	0.0240856820037629
2008217	14	0.00769552971065741	0.023362101941271
2008217	15	0.0119004058586636	0.0535631056734013
2008217	16	0.0276524807205027	0.0862753006526265
2008217	17	0.0221718913414059	0.0609180952221318
2008217	18	0.0331740163012953	0.135500058003862
2008217	19	0.070468264379411	0.244642385759512
2008217	20	0.0841448934135469	0.260575264905184
2008217	21	0.0825040208708203	0.241020473000087
2008217	22	0.0780058851283311	0.232518409315383
2008217	23	0.0767502520371715	0.2128045404741
2008218	0	0.0787407028619528	0.204128357955904
2008218	1	0.0792526777945805	0.200425470689873
2008218	2	0.076847330406147	0.200706331332839
2008218	3	0.0740546526714965	0.218432077783136
2008218	4	0.079285878717745	0.351824709288106
2008218	5	0.091560934021465	0.506066684641708
2008218	6	0.109892861286696	0.682664394531307
2008218	7	0.116332982758734	0.614986974630132
2008218	8	0.118672021673257	0.607215550345403
2008218	9	0.123954842550038	0.635320688602336
2008218	10	0.132593390499802	0.657468200503998
2008218	11	0.132740246851029	0.602745435898168
2008218	12	0.128009926766852	0.51806611860886
2008218	13	0.125242939984352	0.461210701799202
2008218	14	0.124320506616949	0.442339273874995
2008218	15	0.121592097418875	0.402941962534268
2008218	16	0.112968197314768	0.307982036125376
2008218	17	0.101146269782278	0.235879028519638
2008218	18	0.0951791794263533	0.231776149162149
2008218	19	0.0974880016301501	0.270053833563328
2008218	20	0.0975129448212933	0.260884868125311
2008218	21	0.101113326929651	0.271359213583397
2008218	22	0.108808712994224	0.319347559759165
2008218	23	0.116532579689468	0.383529899057709
2008219	0	0.118011200526049	0.41677974156848
2008219	1	0.113669220860322	0.416682765149532
2008219	2	0.111547749915458	0.439417627516841
2008219	3	0.110960560847849	0.469355650158005
2008219	4	0.101932586973919	0.430182099584142
2008219	5	0.0959270302075084	0.398444292327383
2008219	6	0.101099491025991	0.377866102139937
2008219	7	0.0856837752485401	0.278978798972797
2008219	8	0.0765948674043134	0.250161214017175
2008219	9	0.0745825529122054	0.246789597449678
2008219	10	0.0724818779600625	0.240941274047149
2008219	11	0.0695920339642268	0.232076375426709
2008219	12	0.0657842216934322	0.222916192507351
2008219	13	0.0622495636967967	0.214888336926135
2008219	14	0.0594788982999345	0.206069996493509
2008219	15	0.0605144085439507	0.200397160790518
2008219	16	0.0631056339137876	0.198300119756573
2008219	17	0.0661334602706452	0.198194973802693
2008219	18	0.0686682009479352	0.197711081111734
2008219	19	0.0703079203652772	0.197518651404997
2008219	20	0.0697439753783534	0.192293347732587
2008219	21	0.0684955041383486	0.184751024228646
2008219	22	0.0679565549003202	0.175660990939651
2008219	23	0.0666251218946997	0.162285573481673
2008220	0	0.0654517427379048	0.147559562267075
2008220	1	0.0636220139289559	0.132348105433634
2008220	2	0.0612471826692893	0.118504705367988
2008220	3	0.0588508313090746	0.10675915765978
2008220	4	0.053759080153412	0.0954749692559999
2008220	5	0.050772846665391	0.0912571232432044
2008220	6	0.0463596316739555	0.0828782606342834
2008220	7	0.0445025791685931	0.0766010502511935
2008220	8	0.0418532950008268	0.0729425935452489
2008220	9	0.0403838777878073	0.0917407684714671
2008220	10	0.0350106163784738	0.0856438566455779
2008220	11	0.0302950158128922	0.0716141473796746
2008220	12	0.0280995452663156	0.0576537589887564
2008220	13	0.0271494451831066	0.0506998743199165
2008220	14	0.0278661566670476	0.0443366799322189
2008220	15	0.0274967009613109	0.0381609505124838
2008220	16	0.0269229615953733	0.0355894892232206
2008220	17	0.0265703257892656	0.0337771092530311
2008220	18	0.0262037670020869	0.0317145009476068
2008220	19	0.0254120492283257	0.0292508664488777
2008220	20	0.0224505375223091	0.0247915261936973
2008220	21	0.0178359512066181	0.0193639607656606
2008220	22	0.0153544964439726	0.0169633320072262
2008220	23	0.0184993922906691	0.0213054421861843
2008221	0	0.0308335500793211	0.0361041933864812
2008221	1	0.0240059192473115	0.0304833069280575
2008221	2	0.00896913308028952	0.0156900020522495
2008221	3	0.00506768822309385	0.0104750972957854
2008221	4	0.00421885263461259	0.00852575339170498
2008221	5	0.00523382568759374	0.0113151580038655
2008221	6	0.010252199132144	0.0297244895774764
2008221	7	0.0208434888521074	0.0691371700860309
2008221	8	0.0266542821963648	0.0826757324156009
2008221	9	0.0205752215584209	0.0570308643939173
2008221	10	0.0238577788443512	0.0543438518225841
2008221	11	0.136807633343964	0.302873159215709
2008221	12	0.213538802127119	0.463638671822485
2008221	13	0.189020689053633	0.350164213968277
2008221	14	0.114182432730769	0.194335702538225
2008221	15	0.0284450367705703	0.0518396804715978
2008221	16	0.0134086697207571	0.0271864274455718
2008221	17	0.0325475713049075	0.0607016607556324
2008221	18	0.0448569864629423	0.073415578688062
2008221	19	0.0379327760728455	0.062913814378018
2008221	20	0.0569049588058737	0.104553099171963
2008221	21	0.125046392890573	0.365874959891264
2008221	22	0.122317188611787	0.543722362433865
2008221	23	0.0680119429458837	0.387012112915791
2008222	0	0.102848020321625	0.668526472355386
2008222	1	0.316988667116771	1.66564400553711
2008222	2	0.466575531392639	2.25197839367969
2008222	3	0.606680857679826	2.93172401870291
2008222	4	0.618243924550025	3.15156047440837
2008222	5	0.649855937406511	3.09241671111366
2008222	6	0.668922577182287	3.19234711820405
2008222	7	0.66448501434249	2.95734499770951
2008222	8	0.622676728491711	2.73356973194343
2008222	9	0.586958565434362	2.51893170388422
2008222	10	0.507599291837654	2.14342704674939
2008222	11	0.424840484813071	2.02225473359611
2008222	12	0.311840688810091	1.47117689015437
2008222	13	0.240538013866632	0.796102352794928
2008222	14	0.216494258728966	0.582835044871226
2008222	15	0.200958723926077	0.477981103240229
2008222	16	0.18482981481606	0.398669017449661
2008222	17	0.168975576829662	0.330665508849624
2008222	18	0.159506912178186	0.287375729918982
2008222	19	0.150181615853696	0.25837848330975
2008222	20	0.15109173850942	0.268396108197429
2008222	21	0.170687049934123	0.287017394681025
2008222	22	0.178242454365416	0.299598065718343
2008222	23	0.187174108270429	0.295518053284713
2008223	0	0.19020151762815	0.285062317039653
2008223	1	0.178025949644227	0.25204401455009
2008223	2	0.172941713304171	0.229058411332235
2008223	3	0.183512779599896	0.235406841348813
2008223	4	0.193679135759446	0.2507591855776
2008223	5	0.182271524384123	0.240154512100004
2008223	6	0.173306745658895	0.230058372634989
2008223	7	0.184171606109187	0.255536794421445
2008223	8	0.177493928013237	0.25714646080426
2008223	9	0.147028353937563	0.223750247776636
2008223	10	0.120841586994067	0.186136075580096
2008223	11	0.1031093692809	0.149615420133631
2008223	12	0.0837678568553767	0.116895569327033
2008223	13	0.0745070650442571	0.0964290566069607
2008223	14	0.0697131000504783	0.0847107759807463
2008223	15	0.0675349839199279	0.0792006678168714
2008223	16	0.0673620444481636	0.0771351107322556
2008223	17	0.0693127630341665	0.0781591607996949
2008223	18	0.0708025787568346	0.0793608512894912
2008223	19	0.0714010072974195	0.0803697943864642
2008223	20	0.0704491822351378	0.079372972022796
2008223	21	0.0698307900088516	0.0783083267962957
2008223	22	0.0693590725954604	0.0772627799318204
2008223	23	0.0733320536444641	0.0818629573201601
2008224	0	0.0797504330970712	0.0910091369964743
2008224	1	0.0821759546895958	0.0960598683211207
2008224	2	0.0822732195505576	0.0972380197099597
2008224	3	0.0817739852729188	0.0967808211928963
2008224	4	0.0805541257021205	0.0938381490199439
2008224	5	0.0703699564281445	0.0798059916419396
2008224	6	0.0592128615262953	0.0659474537402389
2008224	7	0.0536578210050752	0.0600165979854866
2008224	8	0.0526139510146995	0.0659840753401636
2008224	9	0.0560459370067421	0.108711571227601
2008224	10	0.05619966050972	0.123478551145664
2008224	11	0.0605516192030191	0.143520659900628
2008224	12	0.0662171885023829	0.135942971359518
2008224	13	0.0713966476935571	0.126816255631866
2008224	14	0.0750423818382543	0.121397787242351
2008224	15	0.0783536546270177	0.123592299864191
2008224	16	0.07966641267161	0.125793770490309
2008224	17	0.0817631103365857	0.128104909331136
2008224	18	0.0795964229424447	0.110649710289937
2008224	19	0.074375452712016	0.0983645430637228
2008224	20	0.0685461045694447	0.0968791694721286
2008224	21	0.059637221772916	0.0964828669149276
2008224	22	0.0542274168931253	0.100266249034425
2008224	23	0.0522749544701252	0.105007203620531
2008225	0	0.0498223342774463	0.101880556172742
2008225	1	0.0442663617164198	0.0815291832690831
2008225	2	0.0351169370537724	0.0595461107739158
2008225	3	0.0277786604297611	0.041783679216666
2008225	4	0.0297478329653491	0.0417277536460938
2008225	5	0.0464638759918916	0.0563488123886696
2008225	6	0.0513406455060287	0.058433659177929
2008225	7	0.047468248294882	0.053413512912355
2008225	8	0.0407173307204756	0.0464306054032377
2008225	9	0.0334254021815985	0.038830175514042
2008225	10	0.0285845367814104	0.0339283809586183
2008225	11	0.0281942377492894	0.0372881678968878
2008225	12	0.025725608072676	0.0350430740490027
2008225	13	0.0377395372537381	0.0594993348204587
2008225	14	0.0609659468139667	0.0898679322936108
2008225	15	0.0674520639957873	0.0899979156304322
2008225	16	0.0639044806867676	0.080555542942766
2008225	17	0.05706631499811	0.0720378655096045
2008225	18	0.0537581893847129	0.0678555128247387
2008225	19	0.0402060404762636	0.0514227679400515
2008225	20	0.0118726363404851	0.0164178422520402
2008225	21	0.00819075657977348	0.0158205861633957
2008225	22	0.0255006899904321	0.0628601710418782
2008225	23	0.0965975711311816	0.187481511572275
2008226	0	0.17619129639126	0.327439470638046
2008226	1	0.192241617758826	0.32726873966287
2008226	2	0.196942369544004	0.309875689143407
2008226	3	0.201992698178306	0.374976969527662
2008226	4	0.211446596607608	0.477920974404728
2008226	5	0.249223602247521	0.558390820322249
2008226	6	0.296593567452351	0.679730439537838
2008226	7	0.294555240354625	0.684496830700236
2008226	8	0.258769584942111	0.625885409428027
2008226	9	0.207910052914573	0.537963858225772
2008226	10	0.218208864256039	0.601072427734534
2008226	11	0.32302941047822	1.09184896927289
2008226	12	0.409211865341351	1.35382103392017
2008226	13	0.43205974387444	1.45376759797262
2008226	14	0.421800451315779	1.29788666166284
2008226	15	0.414794412548296	1.28611496991907
2008226	16	0.431296938092304	1.26010875666068
2008226	17	0.433169526839905	1.0806451193778
2008226	18	0.419938417088091	0.969283008347603
2008226	19	0.423013701375688	0.937917156356274
2008226	20	0.419395890704943	0.798680709145851
2008226	21	0.314972285255405	0.588075454944597
2008226	22	0.22228003836306	0.520620230633797
2008226	23	0.222398286905494	0.554365740490077
2008227	0	0.245711873077642	0.574997234120658
2008227	1	0.348079959377201	0.711113820415162
2008227	2	0.593171550139543	1.22550358154092
2008227	3	0.774127162119045	1.36602577630436
2008227	4	0.790896906966335	1.26728293990469
2008227	5	0.794670953774729	1.15489551722855
2008227	6	0.737298903105881	1.05866683609243
2008227	7	0.632314936113432	1.01541372144864
2008227	8	0.552844787247595	1.00265605461428
2008227	9	0.506475781087575	0.984557690184455
2008227	10	0.475654367381138	0.953701966535151
2008227	11	0.444575403913858	0.838064379830039
2008227	12	0.404168465922981	0.711816760717954
2008227	13	0.358766106180754	0.599793658271843
2008227	14	0.330052478977291	0.520707472466255
2008227	15	0.318391864704566	0.46898757780753
2008227	16	0.307188954184237	0.433814938807364
2008227	17	0.303417057079336	0.423349370534847
2008227	18	0.308545465240937	0.436278740797782
2008227	19	0.320747584192051	0.450829425048439
2008227	20	0.335325769027634	0.438310877099536
2008227	21	0.337395746152421	0.408909008314377
2008227	22	0.334895836681704	0.400837704526459
2008227	23	0.333293571768519	0.398702170271347
2008228	0	0.327228137000373	0.387667343216766
2008228	1	0.321559417330528	0.376864198510695
2008228	2	0.315251385000698	0.36717746209018
2008228	3	0.304740562853679	0.354030368052842
2008228	4	0.29198873183159	0.342896584604858
2008228	5	0.303926742865571	0.377384816821132
2008228	6	0.326417179126012	0.43932694158214
2008228	7	0.321315039610864	0.420535465205499
2008228	8	0.310451295175545	0.492435610899667
2008228	9	0.301577595422126	0.564360737506948
2008228	10	0.282197327297477	0.568183254765811
2008228	11	0.252833982183771	0.541091276322009
2008228	12	0.225225008556773	0.487746877989532
2008228	13	0.195639363912239	0.423963844393106
2008228	14	0.149621134879394	0.307590061091347
2008228	15	0.0828643571947159	0.159823840586066
2008228	16	0.0289964573844501	0.0538601465983585
2008228	17	0.0307549111506056	0.0532813224884516
2008228	18	0.0346035000976387	0.056573506364481
2008228	19	0.0445892800501079	0.069583457134177
2008228	20	0.0631259350055264	0.100991352262233
2008228	21	0.0790379495293919	0.130344889325335
2008228	22	0.0889408406152821	0.153827297253113
2008228	23	0.0915683456658865	0.153896503554385
2008229	0	0.0914678107268346	0.152502090407574
2008229	1	0.0958342221064846	0.158689094278374
2008229	2	0.100198236392065	0.168507036928282
2008229	3	0.105842059293485	0.181148303230143
2008229	4	0.109365316717931	0.189746197100322
2008229	5	0.115534746267932	0.190647129306102
2008229	6	0.145620177342868	0.27721056445234
2008229	7	0.17230545674813	0.327177427408326
2008229	8	0.195646973578667	0.439459759495323
2008229	9	0.191804611099074	0.458281208249134
2008229	10	0.18562080588124	0.475969511823994
2008229	11	0.179616799480529	0.472685381517694
2008229	12	0.174129033795815	0.450018170562567
2008229	13	0.168398984723478	0.427166387409011
2008229	14	0.164390455484929	0.397982993048885
2008229	15	0.160978210016331	0.367428060317748
2008229	16	0.154900660340337	0.3275289471735
2008229	17	0.149895903075372	0.291157916953396
2008229	18	0.150679921068227	0.272714163269421
2008229	19	0.161856720190053	0.274054692549972
2008229	20	0.17097553145359	0.277618307769058
2008229	21	0.175409580178197	0.266411801869702
2008229	22	0.174811517435246	0.252592860192688
2008229	23	0.181026860732514	0.272852601010301
2008230	0	0.190610392497803	0.295136877417506
2008230	1	0.202269110336317	0.312332491228955
2008230	2	0.212937845085135	0.327060718928176
2008230	3	0.223669302004468	0.351826945318793
2008230	4	0.24495236637823	0.404052784536637
2008230	5	0.25777249741536	0.421650744807465
2008230	6	0.252802289041067	0.412704980426947
2008230	7	0.2444640336751	0.401059075313026
2008230	8	0.247676364648907	0.396281803385097
2008230	9	0.256880719926227	0.410806328006805
2008230	10	0.220415944223968	0.349501230975242
2008230	11	0.175921299004276	0.294306557799059
2008230	12	0.143504944152736	0.281326601274353
2008230	13	0.129014234413183	0.277500845972957
2008230	14	0.120667006870138	0.251196600482125
2008230	15	0.113617437993223	0.223481992429321
2008230	16	0.105659374334977	0.196164048761892
2008230	17	0.101377999430116	0.177549885110221
2008230	18	0.0988405694974031	0.150277845166525
2008230	19	0.0941730634509111	0.129240967747649
2008230	20	0.0923613281393314	0.123435665965886
2008230	21	0.0901336632187508	0.1178392845995
2008230	22	0.0857797252045023	0.111821754534489
2008230	23	0.0857710441392933	0.113217301828112
2008231	0	0.079525914770413	0.101962300358684
2008231	1	0.069756880969442	0.0854958286099707
2008231	2	0.0519501040515227	0.0617764834999465
2008231	3	0.039607549094406	0.0470787348773355
2008231	4	0.0370178895691774	0.0438409373518034
2008231	5	0.03796361644984	0.0451926962985113
2008231	6	0.0436038179501909	0.0528699908583132
2008231	7	0.0524979497200611	0.0644452472349206
2008231	8	0.055240485327153	0.065273348092757
2008231	9	0.0567777001220796	0.065036812187023
2008231	10	0.0583758760478798	0.0682276692668284
2008231	11	0.0617810241518331	0.0831603757804576
2008231	12	0.0738906345401809	0.182057808350017
2008231	13	0.137813253090671	0.401764418567709
2008231	14	0.218911040612901	0.538617054782016
2008231	15	0.250872010583927	0.522576834322452
2008231	16	0.261901084377991	0.484754659033124
2008231	17	0.27102078984879	0.473450510245103
2008231	18	0.27230787912943	0.41704753981026
2008231	19	0.264944226416612	0.376025968972402
2008231	20	0.262336702118119	0.369938036440998
2008231	21	0.268776824093773	0.358203819454703
2008231	22	0.275371930895222	0.344733877631303
2008231	23	0.271638597653467	0.32781133599489
2008232	0	0.264925329399764	0.310758323499089
2008232	1	0.249443642458249	0.285326856228566
2008232	2	0.218546357915734	0.245681945425588
2008232	3	0.17101862289176	0.189722483779128
2008232	4	0.121377257320651	0.134911445570248
2008232	5	0.0820094572347271	0.092655468686397
2008232	6	0.0596238087432602	0.0678486469946536
2008232	7	0.0814185625983746	0.0932247565515473
2008232	8	0.125040041387993	0.141096519273065
2008232	9	0.196169472948167	0.219466994549076
2008232	10	0.220639445439982	0.334068365795281
2008232	11	0.194530145572909	0.347371963338983
2008232	12	0.16290084101067	0.260892835813361
2008232	13	0.140513631589352	0.194633343127416
2008232	14	0.131665101645228	0.162542815056663
2008232	15	0.123991991277936	0.146392213193462
2008232	16	0.115517158705166	0.133596462210217
2008232	17	0.104991466699616	0.118840945805672
2008232	18	0.0900625392679875	0.0997785055644916
2008232	19	0.0726103038181693	0.0809018041088039
2008232	20	0.0742139624033922	0.0940614463467748
2008232	21	0.0806699882978333	0.143010940044321
2008232	22	0.098265970388377	0.203866968594206
2008232	23	0.127837686610043	0.258244978236353
2008233	0	0.168966782688618	0.320041678473272
2008233	1	0.220620244891072	0.380754301669163
2008233	2	0.238156789895007	0.397503922013901
2008233	3	0.253219450861978	0.467893676528133
2008233	4	0.280274719162859	0.497212091014219
2008233	5	0.287283776909447	0.418254517569851
2008233	6	0.265249792518576	0.319636699562884
2008233	7	0.241024399820712	0.277570204659994
2008233	8	0.23194033334404	0.372236984125563
2008233	9	0.231060792996504	0.538754484327893
2008233	10	0.208166944088811	0.572469646738849
2008233	11	0.193205330402419	0.536803045071041
2008233	12	0.188961293703518	0.569863229775271
2008233	13	0.182902682613958	0.549628670178245
2008233	14	0.169207037139203	0.49366725724303
2008233	15	0.159353271202114	0.445650712118093
2008233	16	0.157639992484522	0.391491561128837
2008233	17	0.146233106069991	0.319011652108173
2008233	18	0.113409442246991	0.225619480346528
2008233	19	0.113585607088961	0.231462228061287
2008233	20	0.165458539258959	0.409768995161695
2008233	21	0.177884449561626	0.596757628901949
2008233	22	0.171238276001466	0.628842041095734
2008233	23	0.168835427936647	0.612794036045974
2008234	0	0.173382435840606	0.686371800355794
2008234	1	0.182556459779654	0.71207186414509
2008234	2	0.189027037069816	0.657469878744484
2008234	3	0.188067530144225	0.606455175581455
2008234	4	0.175217137777441	0.53389952095156
2008234	5	0.158170602111213	0.413356648543205
2008234	6	0.15144372919074	0.331994077587421
2008234	7	0.151383649356566	0.299950332443821
2008234	8	0.15129507975603	0.309978645120814
2008234	9	0.152799719492284	0.376977944990163
2008234	10	0.155993233738571	0.399542292791406
2008234	11	0.166336003532798	0.39074588017742
2008234	12	0.171688796127434	0.380163077169236
2008234	13	0.16936354402584	0.369816048689069
2008234	14	0.164121565856662	0.361093436583172
2008234	15	0.159910829929991	0.332188506559052
2008234	16	0.155970456699249	0.293075105585684
2008234	17	0.153136864656087	0.246420029774264
2008234	18	0.15340722017713	0.205007286735826
2008234	19	0.143913160140367	0.164007085429396
2008234	20	0.143019057911599	0.159522655204831
2008234	21	0.146971801139116	0.163277527727491
2008234	22	0.151901418472436	0.166340695899347
2008234	23	0.157475241471079	0.170594057379608
2008235	0	0.162416098943445	0.175656471999468
2008235	1	0.165649255249963	0.181724075836073
2008235	2	0.169845600463803	0.190927232736018
2008235	3	0.169292026738722	0.190531139656474
2008235	4	0.167277568185222	0.186283663527902
2008235	5	0.165722695172415	0.1824424783219
2008235	6	0.163161110902753	0.178720445953617
2008235	7	0.155790204313285	0.174157086346378
2008235	8	0.145955572397594	0.163202824125756
2008235	9	0.128646816417841	0.157561996725961
2008235	10	0.129034739322029	0.281249751746267
2008235	11	0.120912105825983	0.272627178226716
2008235	12	0.118816040155942	0.252909002663474
2008235	13	0.118964031010442	0.231427571765273
2008235	14	0.117918126229103	0.209071753161678
2008235	15	0.115325666743343	0.190974682188867
2008235	16	0.112754726586074	0.166877829846559
2008235	17	0.11353550581902	0.146722478323727
2008235	18	0.12137726375303	0.150637874243677
2008235	19	0.126673458219059	0.150263914707576
2008235	20	0.126656376188548	0.149179229664427
2008235	21	0.117916197230193	0.145001318295397
2008235	22	0.0794889511091832	0.10134582166964
2008235	23	0.0212790534851989	0.0281079800698522
2008236	0	0.00638828796439486	0.00882439342035604
2008236	1	0.00415688195696033	0.00678383919357284
2008236	2	0.00476750148296022	0.012481085908198
2008236	3	0.0111658551904984	0.0416363380980857
2008236	4	0.0222360489991144	0.0597085869816804
2008236	5	0.0268103538283601	0.0735616849858453
2008236	6	0.0590406584218873	0.189623771467706
2008236	7	0.114454678926383	0.357376131888956
2008236	8	0.129810035847251	0.384052568952108
2008236	9	0.130390929813171	0.396813089893835
2008236	10	0.127366422558166	0.384786785984794
2008236	11	0.107020564465922	0.327009359156379
2008236	12	0.0832165111129866	0.277592286899335
2008236	13	0.0797751994889063	0.294052100904283
2008236	14	0.10624747225723	0.430457892482589
2008236	15	0.121905850663995	0.462984015982844
2008236	16	0.104923966729621	0.346744139228038
2008236	17	0.0951189607816853	0.273540912665435
2008236	18	0.113749057329474	0.415244820463416
2008236	19	0.173469084790692	0.680017836821996
2008236	20	0.223506095694716	0.78409448452246
2008236	21	0.224726768653491	0.740935097415874
2008236	22	0.203680902513514	0.601094920542022
2008236	23	0.139947919248513	0.38422465189879
2008237	0	0.0641152257032324	0.147105396305088
2008237	1	0.0242980313725566	0.0549868596136471
2008237	2	0.0408151593846082	0.0859238553586891
2008237	3	0.100094192683452	0.227974811860554
2008237	4	0.0994122182107304	0.241125847266972
2008237	5	0.0582142949376492	0.159009554923826
2008237	6	0.0356433262427595	0.133537609478098
2008237	7	0.0629797229662458	0.249089946710993
2008237	8	0.0969792360463641	0.314448750509036
2008237	9	0.12601770859386	0.351702906608437
2008237	10	0.141355093641515	0.362851548207497
2008237	11	0.145770653827693	0.391228875094328
2008237	12	0.145135368509725	0.471578246744781
2008237	13	0.142758360760149	0.5304255183014
2008237	14	0.141607517257113	0.567361666107488
2008237	15	0.142882754355441	0.541848453885401
2008237	16	0.137803697056851	0.465008588986042
2008237	17	0.127882296880845	0.365979980896881
2008237	18	0.116104617719563	0.295527243827782
2008237	19	0.0982779065539603	0.199289807074583
2008237	20	0.0882991926784643	0.17629471869074
2008237	21	0.081881641045714	0.168985087411718
2008237	22	0.0779898399583118	0.162341120775547
2008237	23	0.0751321317504642	0.155171282071328
2008238	0	0.0724092417463281	0.147071223397344
2008238	1	0.0694592450163991	0.137236000734756
2008238	2	0.0653145162531441	0.125624483206336
2008238	3	0.0607686156682797	0.111576913074814
2008238	4	0.0559930868950511	0.0980123410963386
2008238	5	0.0515535436633926	0.0878143436981294
2008238	6	0.050014650348961	0.0841839437346036
2008238	7	0.0494899371002613	0.0817205903252714
2008238	8	0.0481865976810622	0.0780571308023614
2008238	9	0.046866855266225	0.0757641334775906
2008238	10	0.0459799129001068	0.0766492387828504
2008238	11	0.0479214138653604	0.0846552626084134
2008238	12	0.0487661413181645	0.0881384344291111
2008238	13	0.0493043304565242	0.0899671999521059
2008238	14	0.0525249910827517	0.0988055550048698
2008238	15	0.0544986202310561	0.109383327920604
2008238	16	0.0572567234609605	0.122583895019019
2008238	17	0.0600179882439249	0.133117059772773
2008238	18	0.0603929843090025	0.137916155989344
2008238	19	0.0593482084527983	0.139511694998974
2008238	20	0.0579822902544676	0.144390729709362
2008238	21	0.0517028156844926	0.130535960988883
2008238	22	0.0403672583783287	0.0866779862245613
2008238	23	0.0368576730822651	0.0632538606344907
2008239	0	0.044710225629615	0.0721136540252563
2008239	1	0.0512326805625023	0.0826454966578576
2008239	2	0.0534228535377275	0.104430347110593
2008239	3	0.0560254475777062	0.157460728546647
2008239	4	0.0635397276563684	0.190951100059428
2008239	5	0.0698308552308626	0.156690456995671
2008239	6	0.0747329605697446	0.137442201277506
2008239	7	0.0826567404970179	0.149148584374399
2008239	8	0.0900433573078049	0.159315380406887
2008239	9	0.0884756457489368	0.151625326898717
2008239	10	0.0903785398977392	0.155563406169073
2008239	11	0.0912833236046056	0.159130082461834
2008239	12	0.101046925177929	0.181329666902517
2008239	13	0.227945305636783	0.769745408072565
2008239	14	0.256308737734178	0.776598535555622
2008239	15	0.245360605089164	0.616972427474462
2008239	16	0.221674551023419	0.472336355199222
2008239	17	0.211620786488366	0.400058847435753
2008239	18	0.239784263952639	0.386999476169707
2008239	19	0.247491422903509	0.347169106502367
2008239	20	0.250733847279801	0.338819515997665
2008239	21	0.247473560986962	0.325615510851812
2008239	22	0.235736729325234	0.3140551383661
2008239	23	0.230680573422834	0.324985468948447
2008240	0	0.225686752265874	0.334312463979228
2008240	1	0.219273773514452	0.349745280033312
2008240	2	0.211886017246614	0.341626833546138
2008240	3	0.209646826625154	0.325007587476972
2008240	4	0.206737390111151	0.310628057862256
2008240	5	0.201362272526855	0.302765256428173
2008240	6	0.193654942802725	0.302050690149149
2008240	7	0.197658177714673	0.339452732187407
2008240	8	0.202840783431858	0.360412197891256
2008240	9	0.205355370222288	0.362508677066535
2008240	10	0.166168930126762	0.300315474269462
2008240	11	0.147563040891537	0.269640787602947
2008240	12	0.134904872258701	0.249233671254159
2008240	13	0.124862838663517	0.230528686709876
2008240	14	0.115663135335928	0.213273749384804
2008240	15	0.108509075673165	0.193003602280982
2008240	16	0.102799676175264	0.170579146886036
2008240	17	0.10252585250693	0.157884725145002
2008240	18	0.109233177488258	0.160931163665291
2008240	19	0.107133303049641	0.145058253040526
2008240	20	0.100968756394358	0.128334291663534
2008240	21	0.101766002139378	0.13665376331832
2008240	22	0.118769526139707	0.170272585627984
2008240	23	0.140265320580746	0.223813836455647
2008241	0	0.146376361056552	0.243919215348713
2008241	1	0.146506548903019	0.243426194961306
2008241	2	0.143751762614934	0.223613732098066
2008241	3	0.132961397406083	0.189895470315529
2008241	4	0.115908306176249	0.161776844721011
2008241	5	0.10566604814107	0.145660237226492
2008241	6	0.100177263396693	0.149375271285582
2008241	7	0.100044286594408	0.163733431841633
2008241	8	0.100805991528232	0.176326553289796
2008241	9	0.101715170653584	0.189061757641072
2008241	10	0.0999395924381824	0.191336249447305
2008241	11	0.10800903643636	0.248870369082249
2008241	12	0.117484665323551	0.296579002980324
2008241	13	0.124215417855146	0.323183907248505
2008241	14	0.133489192577063	0.351057567790707
2008241	15	0.144974238944976	0.37899379913557
2008241	16	0.139768604833795	0.339136343174862
2008241	17	0.127303984637073	0.27721011792886
2008241	18	0.119598818324615	0.26309640406666
2008241	19	0.142360329816703	0.311305886565119
2008241	20	0.183374341025431	0.366143762729034
2008241	21	0.199831366112904	0.354415382592868
2008241	22	0.197087144314021	0.308971150153561
2008241	23	0.175791178781376	0.258191940606151
2008242	0	0.14400179186025	0.224293322090239
2008242	1	0.134758303680108	0.257568368139211
2008242	2	0.13821775484357	0.342618633703763
2008242	3	0.138134587206255	0.459183155408456
2008242	4	0.144480087712537	0.548835287388536
2008242	5	0.151366014091416	0.585246842482414
2008242	6	0.123608789507904	0.454683248277049
2008242	7	0.107895896918205	0.364595312595752
2008242	8	0.14242637534661	0.457609945829873
2008242	9	0.177330859686086	0.581442402217296
2008242	10	0.151899083759324	0.511196384616964
2008242	11	0.0841694560365257	0.328282035511701
2008242	12	0.0615513813251463	0.252485935170527
2008242	13	0.0656927911383027	0.234645155709944
2008242	14	0.0773572554152206	0.235953374679212
2008242	15	0.102001316265209	0.262342860167237
2008242	16	0.135368590653431	0.295934751865859
2008242	17	0.155747017624685	0.30398921030431
2008242	18	0.16180080032353	0.296634570869907
2008242	19	0.164429983763241	0.282894421353274
2008242	20	0.16977095888937	0.278041368179158
2008242	21	0.179574222228977	0.280371494964926
2008242	22	0.184640670147599	0.278176628127503
2008242	23	0.182864149453623	0.280326100744262
2008243	0	0.179248260402952	0.281060078788591
2008243	1	0.176679699306811	0.279783852313876
2008243	2	0.172821406804669	0.280051433052581
2008243	3	0.170674166339542	0.281655683901923
2008243	4	0.168163319038499	0.274995115324866
2008243	5	0.161279648076485	0.265675191065176
2008243	6	0.159525170050213	0.301942354743938
2008243	7	0.165064879950433	0.385675759489474
2008243	8	0.183719009354996	0.486645041669069
2008243	9	0.188719873274932	0.510349356132358
2008243	10	0.170760216540146	0.451286483674593
2008243	11	0.154818740143391	0.39391022064971
2008243	12	0.145476002982804	0.359015824550877
2008243	13	0.139084103603929	0.331023743561211
2008243	14	0.133805658856519	0.304983417535865
2008243	15	0.128516089424217	0.280765449534183
2008243	16	0.119619170597539	0.25245364501105
2008243	17	0.105196887685761	0.212122858274643
2008243	18	0.090760504141425	0.169934033697297
2008243	19	0.0814867789202305	0.142191180741594
2008243	20	0.0753812250832263	0.125517304748217
2008243	21	0.0707320488606182	0.114707889612049
2008243	22	0.0670898573721864	0.106198038061004
2008243	23	0.0635841120474136	0.0982704259769102
