# Supplementary material for: A comparison of sea salt emission parameterizations in northwestern Europe using a chemistry transport model setup
Source: Copernicus journal article supplement (doi:10.5194/acp-16-9905-2016), 2016-08-08
Supplement: Supplementary file 2 [file acp-16-9905-2016-supplement.zip › conc/conc.timeseries.values.sum2008.sp13.Na.moreStations.csv]

doy	hour	DE0001R	DE0002R	DE0003R	DE0007R	DE0009R	DE0044R	DK0003R	DK0005R	DK0008R	DK0031R	FI0009R	FI0017R	NO0001R	NO0056R	PL0002R	PL0003R	PL0004R	SE0014R	NL0011R
2008183	0	1.56646579012344	0.0387128649771833	0.0269971682461645	0.0550234051629032	1.10944294284875	0.0487537912765921	1.52862410743104	1.51968438653432	2.06273075179208	1.7600409954608	0.139201062810626	0.273286036160965	0.206646003027602	0.0255452177937565	0.0265950261285315	0.0321133233589206	0.518249794589093	2.28645785709337	0.106737627200651
2008183	1	1.47512193465083	0.0369395272346	0.0253004713741927	0.0529329400931465	1.14788162029395	0.0463974332368543	1.3252458264734	1.47443646508815	2.02900630512445	1.45445755226802	0.117532006617473	0.284537877981741	0.162440355231303	0.0381415322459459	0.0269290190405269	0.0315206117107722	0.534066006081438	2.42496012978698	0.0925570116939243
2008183	2	1.38707447755892	0.0358286811542185	0.0236870157966619	0.0510526461130935	1.16155202185883	0.0433009459394261	1.03560742548627	1.4486583221722	1.7766564048507	1.39178465340372	0.135591668049602	0.311578475665325	0.177587503847533	0.0489967004116457	0.0274496617707777	0.0306754096321716	0.611034396751701	2.64405778943477	0.0799861915308519
2008183	3	1.29691245436376	0.0354682140810947	0.0223629283622389	0.0490790879351317	1.15746811972683	0.0406343452379161	0.828047401441872	1.439034356641	1.44894208741463	1.37081191674081	0.167403205144607	0.321879342947656	0.216637597963763	0.0522316915521926	0.0279872549773659	0.0299122194788128	0.637882523783901	2.50051980035841	0.0713529833197236
2008183	4	1.1841049335022	0.0354041253511551	0.0214865108128349	0.0472376589069962	1.14189694968732	0.0383411690788567	0.951503457763037	1.46881836133278	1.36473352804485	1.27804521373069	0.246443187091249	0.283937882686269	0.3628109982709	0.0626538837154825	0.0295402500543755	0.0294423972766541	0.683831605431213	2.58414592393613	0.0647928887142
2008183	5	1.03802579701965	0.0349462687166308	0.023033305639256	0.0443760040825646	1.1312420215325	0.0392845493443641	1.06420575055061	1.53203374083308	1.29908761588444	1.18930178743408	0.259334439462944	0.267494124155555	0.629047137546876	0.0839732385590485	0.0359776955372322	0.0285252133416367	0.843341570541634	2.50761119762475	0.0736593824317593
2008183	6	0.885386417585084	0.0573371617314837	0.0250857663005376	0.0755387955709146	1.12356373980428	0.0396508764397492	1.07278299317225	1.61081407328719	1.21761442112818	1.12632935111405	0.213199062698415	0.117984944187236	0.788692286105981	0.08185861812161	0.046157532720657	0.0319939501918947	0.982514108577062	2.40354876918696	0.0778775088985782
2008183	7	0.782825930507439	0.0680500693082019	0.0283272198119618	0.141093936144483	1.10067007858592	0.0362675380552797	1.01724999591089	1.68555097855763	1.05748487307803	1.0199721979765	0.179917032672918	0.096124555413633	0.668991989243553	0.0448869175583869	0.0626594702567837	0.0420497147818565	1.05687581668046	2.36325098667157	0.077348893094773
2008183	8	0.726955368899028	0.072865254436611	0.0251654097835045	0.16820295241504	1.06954032671534	0.0420925633439596	0.805979403759854	1.74399601282116	0.998959431305418	0.916562918341094	0.159567343567249	0.0891681847765517	0.534313051760324	0.0234845914810102	0.0910170132815447	0.0427290295899633	1.10517721093292	2.47405793120716	0.0736427133360895
2008183	9	0.695324932994487	0.058798128381152	0.0205184728723078	0.138929177220219	1.05237126002368	0.0462999608644432	0.574671811349621	1.76161086530676	0.912412339920896	0.814666870754453	0.152545652159276	0.0727584605263791	0.396650262998716	0.025086583081557	0.181865474856426	0.0392313804689013	1.06994984794547	2.50789905385535	0.0756778402909227
2008183	10	0.693599268319038	0.0504150180119146	0.0151131376624456	0.12733022007346	1.05336087005444	0.0430682574608231	0.436211875667048	1.80271554144907	0.786666219355575	0.722139342361687	0.146284806755519	0.0742514056145089	0.308655687618354	0.0499583343779306	0.265742529526885	0.0335123791095649	1.01702218477693	2.35893698837909	0.0761226117277771
2008183	11	0.744086378762903	0.043526202553562	0.0102077887256456	0.117789879937869	1.05482231021478	0.0385922279660129	0.345667785832805	1.87937343327843	0.670441218034491	0.661483561074814	0.138485152154543	0.081350155883591	0.260868538386897	0.0564324075436537	0.301457630015169	0.0304649435083268	0.978722866801466	1.92533913371094	0.0704617417221794
2008183	12	0.841568421022316	0.0346658371654986	0.0081309539009776	0.104745317125113	1.05157194204181	0.034071361070006	0.274809490252537	1.99967750423584	0.596483587142462	0.628487060704613	0.13476388489588	0.0800249727631027	0.238391913370265	0.0478587538443602	0.298665767996636	0.0262391413122831	0.934094323306806	1.40506663683344	0.0593067320116559
2008183	13	0.947737384100125	0.0282003164313858	0.0074008251620088	0.0927707523992192	1.03461514797183	0.0295270233596174	0.240465601440905	2.19095167806393	0.553445734966974	0.614743883320114	0.129514308328411	0.081295018686132	0.222801628493683	0.0352764120095037	0.282991254116003	0.022365522545237	0.900325795804576	1.08314398832837	0.049141198087066
2008183	14	0.976786795821236	0.0237522834127044	0.00674126705447047	0.0838124309159569	1.01167317597196	0.0258880584041127	0.219016573884573	2.4054114285075	0.532451411570863	0.608028949217389	0.135261269256887	0.0817937757236955	0.20859755976447	0.0261246066414804	0.259863470650768	0.0193829689806091	0.863934969374075	0.947782217637121	0.0445222879004513
2008183	15	0.871915846235663	0.0206366692889803	0.00610866366357711	0.0755116022591587	0.996800531646725	0.0229110216336471	0.205527560516566	2.42069018622942	0.547577080576854	0.59467482352834	0.138998285681235	0.0855564564174401	0.198597417506768	0.0203152865989113	0.242240031014619	0.0170869434760586	0.793083757600623	0.934397472219007	0.0401471400636535
2008183	16	0.812260680006891	0.0185245658708495	0.00563149850167664	0.0657680089309404	0.975593551013614	0.0205930029914805	0.200089151245159	2.14057082440351	0.616133232174394	0.574732916014609	0.137362108497046	0.0914099245274532	0.19207094476978	0.0160365276883645	0.226606763911496	0.0153281175485866	0.706127804804367	0.977049613000895	0.0354483060882082
2008183	17	0.948097679332101	0.0171672576352946	0.00510982061604587	0.0605364272288915	0.943619030650406	0.0189472314131992	0.199431486331509	1.87856205384252	0.692888850554252	0.510705079881939	0.137915849007906	0.0903930081981141	0.191575324235469	0.0129042771696723	0.225038435936398	0.0142365604121688	0.62586529630633	1.05744026770581	0.0310624393867222
2008183	18	1.06488779313889	0.0164529677885808	0.00461998655502465	0.0452465656774113	0.913433005778405	0.0174135372255215	0.203045142627553	1.69311910955288	0.775057756091309	0.408635645139519	0.137058482574806	0.0858544412749257	0.210268152632445	0.0106314489061048	0.212160844567853	0.0119089750842625	0.563131215219959	1.17751671622978	0.0265194581972901
2008183	19	1.03889942650527	0.0158798808840198	0.00402614927162172	0.0375322308712069	0.907391884882875	0.0156899215750272	0.209998033841353	1.38560005678908	0.850503888164067	0.328616173824348	0.135864723619014	0.0736063648143555	0.276293836606535	0.0144588844775646	0.122117472867805	0.0104698858824306	0.518623873510289	1.3856273478729	0.0222622415621518
2008183	20	0.905455368204602	0.0150460831323471	0.00364693993329193	0.0386060229437681	0.927062580116069	0.0168211924484015	0.262498945844136	1.14976522223124	0.888797300323016	0.265516122822881	0.130327735311653	0.0607222362278919	0.375827301463624	0.0288502285522009	0.110602716334339	0.00997039574029458	0.488847025780217	1.62029793750867	0.0174072343775382
2008183	21	0.893997708210447	0.01465568492594	0.00333257298169813	0.0448489220787828	0.999408177225551	0.0187301188597979	0.466987342004315	1.10371089299661	0.881277721821849	0.221813184288913	0.12428760671706	0.0481372674242302	0.454448785205723	0.0370222767378677	0.103528227146726	0.0100767274717857	0.469106618450394	1.91795158547475	0.0125457507338983
2008183	22	1.07597836939965	0.015494739385784	0.00302403807870816	0.0629164162258081	1.11468504205823	0.0203532305225737	0.817993177400599	1.1866913500111	0.872944120628976	0.199555053032878	0.125240580516071	0.037489254555246	0.525377923591831	0.039123308571587	0.0981359260594087	0.0109297121659007	0.455742996481413	2.24168630373264	0.00900461282540634
2008183	23	1.03476417510196	0.0166772335275729	0.00272093561665622	0.0792098731691031	1.20773438309481	0.0218289308117375	1.05195419995365	1.20652086875216	0.834138653156901	0.198130013829738	0.141402073798127	0.0304563194133874	0.631971792302159	0.0399524870822883	0.0938209725943667	0.0139380389701101	0.452613002637394	2.43445881099956	0.00740412569447563
2008184	0	0.957051010172719	0.0185961106984021	0.00271232428983099	0.0932319595545126	1.29061931057744	0.0226488229261076	1.10585584822337	1.16102530237437	0.776007780958117	0.277391348655138	0.174860148598397	0.0263710857435162	0.845923005652044	0.0404727659388245	0.0884382618360956	0.016651327678403	0.454820462518645	2.3034668381621	0.00696066593559056
2008184	1	0.896707102742905	0.0234723651287934	0.0023814217218287	0.102613601229725	1.36955739145823	0.0225802498644082	1.11453780363336	1.03880115497359	0.790149438524064	0.606655600958599	0.199577092317458	0.0238690562695332	1.16694821231311	0.0409759481212454	0.0828546197336086	0.0209035855568869	0.458670421852365	2.2315395265084	0.00674376799706076
2008184	2	0.875069770004094	0.0322105002077559	0.00206527955354738	0.104130986130084	1.46462178856277	0.0211878204204444	1.11696711366937	0.965857456187771	0.877811811469711	0.86914776614052	0.208892436829979	0.021944619064585	1.67847849606498	0.0414515146944693	0.078485745846906	0.0249975020783547	0.459680739126748	2.16169405003689	0.00667772102915649
2008184	3	0.680084746285993	0.0414236030389272	0.001841756876528	0.0999504426866788	1.37879790636257	0.0191262799196891	1.08565522009384	0.928057803672085	0.972865628746688	0.935115462031289	0.257776355200443	0.0201689032870554	2.1513669345176	0.0418503896350857	0.0745871797013236	0.0278024510758921	0.443377401382944	2.02408636346848	0.00667699523446567
2008184	4	0.57314517205227	0.0469025742341255	0.00171195204048759	0.0976136797592232	1.35000955917705	0.0175508473682004	0.978080874425334	0.901547143614	1.01821156494882	0.966677121952489	0.32873446314702	0.0189590205394933	2.85825017403596	0.0420272275465518	0.0710797904025456	0.0289304111916544	0.404295442583366	1.67208935078207	0.00658109264616958
2008184	5	0.529747133631366	0.0485123786047171	0.00167113002635462	0.0951315017242124	1.17927357455192	0.0161971750429243	0.825048562347765	0.853609951049969	0.964270318679192	0.902761778876384	0.427797358149825	0.0159168691940532	3.24421912284379	0.0453802682578647	0.0667374255675738	0.0361646618145716	0.397560706491542	1.42465138883291	0.00651907578512398
2008184	6	0.439281578594211	0.0463573726183986	0.00205453668632434	0.101644098046296	1.00588986342139	0.0144235692309108	0.747133832900367	0.795265139149199	0.786508734761649	0.785378564530002	0.526967249486553	0.0145571072694964	2.74730575327485	0.049732190651338	0.0989023673621885	0.0353985415590822	0.408114020846219	1.10714040014953	0.00759510239376644
2008184	7	0.389047147484252	0.0400137576353425	0.00268964390838678	0.104293811028411	0.821629387915461	0.0133506730580069	0.651644917540183	0.739892146963853	0.656710829774922	0.651076764454182	0.602964305576057	0.0165183985618051	1.89277221167139	0.0517659025363096	0.115873851013713	0.023874205000542	0.418502183573886	0.801592244863053	0.00859713139154096
2008184	8	0.368032568014158	0.0339437740094079	0.00330467715099315	0.0972494573014754	0.670305184038594	0.0132239599643692	0.526481835376111	0.672059252068919	0.579890880114307	0.504714893211506	0.626870108784876	0.0195368030262876	1.14494691451275	0.0357515410367118	0.142728402165475	0.0195129774701929	0.373063641210929	0.492508884761638	0.00913116923742529
2008184	9	0.329969037839873	0.0260252654010245	0.0205480735294926	0.0743351562015248	0.53358423957063	0.0150664857880002	0.40332326912248	0.564863540888513	0.504154182498393	0.366721615882452	0.602715027033424	0.0437984955284667	0.872538039545913	0.027039570269776	0.135028316722302	0.0179711133838304	0.314373148964356	0.405814086813549	0.0118285987851554
2008184	10	0.279116844767447	0.0188178802376793	0.0233036612010402	0.0591278852868058	0.457041406106137	0.0150634193670983	0.328017912133303	0.46838604392753	0.419754474582371	0.271347150326952	0.534218092803612	0.0841188106894115	0.610699746647584	0.0247427979866113	0.115779813799818	0.0165165489745699	0.265204732803381	0.424760033682994	0.0136800496931911
2008184	11	0.219856336612516	0.0151553253915976	0.0262254186221728	0.049946062112362	0.430820063196527	0.0140669681464719	0.294575864650167	0.398206507806733	0.346390990792962	0.216148526931537	0.367878723173809	0.108181362676646	0.522706701718546	0.0253051499057283	0.0940837215122408	0.0152672059763386	0.233763390975576	0.516323554530054	0.017036403089979
2008184	12	0.210090756115475	0.0129483474998711	0.0279158899799792	0.0432034803837231	0.429788805792591	0.0127822928968465	0.254937155884147	0.350242061140055	0.304287985963281	0.162870279375107	0.242195566834139	0.114320392696192	0.468293993838064	0.0248040638332403	0.0814070791647801	0.0141421205310922	0.21749334650553	0.73373558814783	0.0219389085923946
2008184	13	0.222604950798158	0.0112792453359119	0.0256033930405475	0.0379725018471871	0.428276323139327	0.0117875853369625	0.239808433628336	0.342432165250008	0.277960351161658	0.139210867965356	0.177212784517198	0.100457288324026	0.429084549471171	0.0228231338741302	0.0735161702200298	0.0130579706130075	0.214952369659375	1.1734776419864	0.0323131153901594
2008184	14	0.242741915241452	0.0103690419151499	0.0256548891467323	0.0333392916730712	0.428822008601106	0.0108813843166146	0.248386353695745	0.348917690272268	0.250000388707132	0.132523265224211	0.152757490060895	0.0574481759915454	0.407461637321137	0.0197803434595487	0.0676926205449676	0.0122744872512071	0.229538229108311	1.65908874034462	0.0560055812908382
2008184	15	0.251189995116706	0.0097397672531887	0.0263140720873215	0.030134164932342	0.422005644438606	0.010049203673019	0.267884331783987	0.380969159998602	0.239795745113958	0.136205783134749	0.173208116314883	0.0438945906443528	0.420062234406631	0.0171636198598128	0.0629124521388355	0.0116282320505383	0.262374388814398	2.36523626866217	0.0885836095632958
2008184	16	0.303780688047568	0.00940978479236042	0.0258813607877367	0.0285125537512922	0.412353557359366	0.00939161005437105	0.288096281485113	0.404411604397218	0.26351925831996	0.147002183214398	0.264574040276231	0.0377076202901189	0.421655334491097	0.0151109115298661	0.0587616884369178	0.0110975162946448	0.31511016274373	3.06285214096092	0.14351021878326
2008184	17	0.429747565953629	0.00917759735402848	0.0234278345359659	0.0285863081674152	0.402894693455467	0.00892859285798223	0.300702232072859	0.429089597087728	0.294068524024152	0.172489957494004	0.409572429009931	0.0335419472062038	0.425265111143064	0.0137920684721092	0.0561306262639501	0.0107822814605463	0.352347944800121	3.6512915302532	0.263084036590411
2008184	18	0.544572293440322	0.00888935539195558	0.0203817835882329	0.0285664757449306	0.445075259215425	0.00872084242589248	0.308024869439702	0.430696262062515	0.327275370278864	0.207935563293233	0.349362647684549	0.0293036648837561	0.456057889654011	0.0136355198698143	0.0491122195657117	0.010622061193072	0.323705572072845	4.01600754605205	0.411049402394324
2008184	19	0.600183798135077	0.00815521537565098	0.0172622600639586	0.026293419305466	0.499105722825958	0.00806542284463968	0.349651156019509	0.55319457390286	0.341128473838256	0.238318810052026	0.285940818273492	0.0259602532527605	0.525871051770873	0.0137006411686163	0.0437302764733515	0.0109831178340558	0.314506463270439	4.13047282315694	0.436657453224636
2008184	20	0.923405348676583	0.00701302235465367	0.0150158357754062	0.0281466740510559	0.703499193982015	0.00697255357694087	0.364508405627667	0.62732355094104	0.300595830159949	0.267549601042382	0.205784247228574	0.0235458183293525	0.593020570091077	0.0139184141535251	0.0466543873856312	0.0132616210304731	0.326307605013753	2.65004669605878	0.437586826703823
2008184	21	0.963958388294376	0.00662603281672389	0.0135245215042583	0.0320965817033329	0.872577844460787	0.00682628098549673	0.362636206996278	0.666944436884571	0.242827742803128	0.29626284454491	0.141032263723339	0.022021612343801	0.711040307239846	0.0143923350329872	0.0468214427444503	0.0184898795340544	0.324620049034308	2.60443245140736	0.430521973244407
2008184	22	0.98114340247844	0.00666838777575902	0.0130067422902916	0.0387223501170071	0.912585211706812	0.00712682369918005	0.370724561828016	0.720372374949869	0.226881460657967	0.315144340396785	0.113405540686691	0.0205966412474395	0.837521557289275	0.0150122167327973	0.0466458003553374	0.0257069670374113	0.314739596869518	2.47871429465373	0.416009568196561
2008184	23	0.948407312640982	0.0078754672073177	0.0114952699837293	0.0467900842416369	0.754430498170709	0.00723463893714776	0.401930142353728	0.680033914722288	0.241554446176218	0.356912939336343	0.105756912856897	0.0180503878226911	0.899495714905733	0.0156534104993328	0.0413898058002727	0.0265812027180785	0.308065999244843	1.96074786032903	0.346711325871081
2008185	0	0.90247078812154	0.0101471623173504	0.00946191522398893	0.0521266679422698	0.464527761390038	0.00727411872780007	0.454386195496897	0.702049874278831	0.265493091966454	0.418892042783014	0.110558476328768	0.0163958967607558	0.857885657793329	0.0162110345642835	0.0362021394948906	0.0272257549984597	0.308266213111768	1.41410941380488	0.31844464713225
2008185	1	0.918604405606538	0.0122331895412372	0.00834405403026363	0.0556433456467612	0.361031931487966	0.00738224046366488	0.507860471648761	0.623160922577934	0.296131356586293	0.487115306459685	0.132799955319568	0.0159275441818894	0.763027155341387	0.0166728509876659	0.0330586520067522	0.026559886559004	0.312924516458725	0.915384121826869	0.238527145828559
2008185	2	1.03717153924913	0.0136538781577245	0.00831211775105493	0.0599429964841025	0.362528815011481	0.00751531527686388	0.549204693749516	0.550643548430583	0.352146581396901	0.54707500157054	0.165099390160162	0.0136772192276235	0.692123441139867	0.0169578051844911	0.031084184902181	0.0245424845771294	0.31867143891585	0.713755334332018	0.198242069244838
2008185	3	1.11309962869045	0.014380799930811	0.011117601298854	0.0652639116883081	0.378611147274483	0.00777040838913251	0.57345460245112	0.465638616364632	0.430027528068777	0.583152604260595	0.181162167042711	0.0158175872344384	0.667004989554718	0.0169974577368397	0.03007722889917	0.0225882727117657	0.327460279657296	0.598808901522682	0.260580862714454
2008185	4	1.14855515064587	0.0143370088471434	0.0162455528489945	0.0694803820076143	0.398332347852898	0.00785637988314451	0.591344266908058	0.585782340580897	0.500444658622447	0.587550164188458	0.17728011987434	0.0160606051402633	0.700371843073002	0.0166378186032191	0.0295962491933355	0.0209278920366597	0.339883521368016	0.530314389338929	0.298498839123168
2008185	5	1.10974179507325	0.0137020955894142	0.0221860837059822	0.0695846095090668	0.439543362588269	0.00736903745039516	0.564967014056327	0.568390341824288	0.518612810192685	0.568046178471041	0.171888470814371	0.0317637799553199	0.709886623211367	0.0244365226174115	0.0308457958630771	0.0196823757964978	0.347340289206384	0.454523695503788	0.446647824961873
2008185	6	0.893839580038105	0.0128793196875392	0.0319899049252958	0.0690614398398385	0.447307650448291	0.00683811764668518	0.571019332386669	0.581572726873903	0.52013416554925	0.461306209317452	0.178321687603946	0.0357606578545685	0.673096503693067	0.0368584518144335	0.0394442888183625	0.0159806399963735	0.341010211285942	0.310667569881277	0.428632380554268
2008185	7	0.766053747681902	0.0111028300759702	0.0316241114665074	0.0682884096935416	0.485764256704412	0.00655252448231217	0.59325354935256	0.643955124741653	0.490228762553354	0.452390817827773	0.178223215035928	0.0267078280063093	0.536111655743393	0.0411607422606267	0.0403328516689478	0.0112886850364329	0.273819005400886	0.244697743136579	0.181154048762043
2008185	8	0.814876422318704	0.00927221755365452	0.0310084865715689	0.0590679585181942	0.502219910232888	0.00651022290251684	0.61314817422202	0.689853995692387	0.373448459704086	0.411717267847516	0.14164993288055	0.00739046077158791	0.411035182131745	0.0436647369019527	0.0466770426307974	0.00904353994423326	0.235632379828349	0.202264801386465	0.0733060146342816
2008185	9	0.857049883513661	0.00840795198810953	0.0291465642592962	0.0475901577986901	0.456700802911788	0.00661956423098744	0.518213385890764	0.728487331371885	0.268558876540575	0.333543871972986	0.124207797303457	0.00962298784130854	0.305313056570239	0.0434733498049516	0.0463369333042399	0.00797181270110453	0.223088368531574	0.195598704099222	0.121690237922547
2008185	10	0.947383773456268	0.00774053052946071	0.0227502023512056	0.0354984071392523	0.572493977540255	0.00664165006557713	0.371740501517307	0.695898328526174	0.197324803210348	0.289300514556508	0.153085880088827	0.0239676164029984	0.239486483283276	0.0459683726879272	0.045126782335829	0.00718299476027384	0.233229623979514	0.199465820246046	0.179430342549542
2008185	11	1.0060816197425	0.00715315976066323	0.00729007801353144	0.0266302898239527	0.714154925328582	0.00666181928618243	0.270844489892065	0.69611925524	0.162180851905366	0.232915400004776	0.116710345628618	0.0266467388801417	0.184743982053213	0.0452907659953355	0.0433702797968227	0.00633265458079189	0.255410922400794	0.23486275407704	0.215143909033462
2008185	12	1.05758892312963	0.00666613257461962	0.00113367356191495	0.0221478195756153	0.873695132823023	0.00658017423183252	0.250437232357982	0.75606057798773	0.151671654012234	0.194286868300441	0.100999326607351	0.0265623925857937	0.163878547736781	0.0382586964966389	0.0411278827089038	0.0059097619896368	0.267546861274512	0.299303193948129	0.407576958771166
2008185	13	1.1434734798453	0.00614181839241895	0.00228301683730889	0.0186559331960431	1.09992876520732	0.00641448169522843	0.248438758164309	0.863079751936227	0.15760517107109	0.191157466688381	0.107426440117352	0.026677508533636	0.155745319123227	0.0292701291671982	0.0388767830425847	0.00597420181396728	0.273046679322624	0.321669799207444	0.528886569478563
2008185	14	1.31766360025079	0.00579576271825817	0.00379365902154628	0.0177569189905877	1.28045523354656	0.00626144992296675	0.234557028249127	1.04872235484763	0.167965687418043	0.204541323733565	0.111682798599923	0.0290405879718586	0.151202134466816	0.0217644170597737	0.0370059387797724	0.00604994196721041	0.271625802132123	0.31231277341802	0.509342106598661
2008185	15	1.41798016271882	0.00541361556894842	0.000660925579030643	0.0184434671466904	1.37392290807598	0.00610255338110769	0.233037980062994	1.18512352995634	0.174677417082176	0.212766166894539	0.13460451260267	0.0316420962140396	0.148888977113301	0.0214847914258689	0.0354537803010223	0.00609434328170282	0.253207136571493	0.254750922972527	0.47159753154975
2008185	16	0.993895395450749	0.00519792763695303	0.00014065893716365	0.020717794342261	1.50046604786777	0.0059665353539049	0.233431757711633	1.2811999123402	0.178232473710667	0.236792603522806	0.10927788568286	0.0335435689438359	0.151940630610773	0.019487475437269	0.0342264454921284	0.00611679986702138	0.24142925792458	0.195133165243053	0.42276847940082
2008185	17	1.01495577418361	0.00451577428844976	8.5251439712825e-05	0.0252687449989506	1.66835836440655	0.00580721992194566	0.238143535196547	1.35524748675851	0.173716069388242	0.243685476201619	0.0864017649889802	0.0349158922607295	0.152650740021299	0.0158741740028146	0.0333460668139471	0.00598338707265498	0.254219947256049	0.153455610088465	0.369235135265076
2008185	18	1.06404419101619	0.00424230238246137	0.000174960326925152	0.029973503793864	1.77683693921949	0.00558295895590545	0.210233718462735	1.44254709403771	0.156873143702547	0.23463315479393	0.0787638057398363	0.0349721085512369	0.184276473640743	0.0162147284051148	0.03277645433691	0.0058177385434449	0.306719123762503	0.144167921230615	0.305776999369926
2008185	19	1.18941125233923	0.00521578526057925	0.00156445862803233	0.0346628229325027	1.82718531988375	0.00535563343123523	0.214498681321147	1.55488945578666	0.133967395743441	0.227875796686116	0.0790600603320856	0.0335223267448893	0.250749830683448	0.0160963882624051	0.0309484929728165	0.00559299741993137	0.309697733206303	0.112433190141851	0.254318741837419
2008185	20	1.2561563298046	0.0246420015804509	0.00237242961454072	0.0385773784642049	1.84658879545443	0.00503400111395964	0.231961591984769	1.56526100379289	0.127745765584859	0.224947998192569	0.0880996155973836	0.0309138055851374	0.315121542609873	0.0152322608571272	0.0293481272131557	0.0055868122816346	0.301986122608501	0.0942796906058858	0.272211895067001
2008185	21	1.05824046142946	0.134673418846711	0.00574808325939097	0.0381004528249069	1.85265439341062	0.00423208059939333	0.240694246370633	1.56066138126829	0.125946246467312	0.233339056951094	0.0987060090732539	0.0282204741154721	0.512344804959847	0.0145019422649038	0.0279476651724923	0.00572924512241871	0.302346103478433	0.107598830703591	0.506001633462784
2008185	22	0.898348933109076	0.254260771206229	0.0499604225446296	0.0349153882412091	1.75133424931667	0.00373247378693158	0.264108215517224	1.48679133633714	0.128999120813937	0.250154047807574	0.122281030996514	0.027402652976238	0.467638109190016	0.0139433333730867	0.0268452557515763	0.00599729106079317	0.297169687020856	0.123464183983266	0.929514056605098
2008185	23	0.95532359513529	0.291893988406862	0.0848071440601405	0.0358613096124115	1.54922704443148	0.00381776210354419	0.2981228367601	1.4082991179204	0.129775450844629	0.272735372349408	0.137821168709557	0.0289373197861801	0.305594782183613	0.0136731032177583	0.0264696535078954	0.00647641943617923	0.285278190754176	0.130240695124968	0.839979327020048
2008186	0	1.1738045676658	0.24953800987329	0.15519943678596	0.0599851783429155	1.39543160200432	0.00553214121823282	0.311595177709198	1.38319274322072	0.142435440254597	0.301299767412602	0.161789065723866	0.0304632150196366	0.327212991327678	0.0138530073877217	0.0261262034758628	0.00691326248236947	0.263081303095825	0.127101070706401	0.883785845678901
2008186	1	1.34385924822921	0.192624557289836	0.232168430729307	0.087548360222229	1.20436693627276	0.0127852434684908	0.241141560610336	1.33854597394445	0.17022961722498	0.343976303940519	0.228881117724042	0.0322744226577613	0.318432842456009	0.0146967770832181	0.0260831382362058	0.00727250343379181	0.244844906662823	0.136301385049407	1.19472545650109
2008186	2	1.40421087495438	0.141084898689974	0.239634766319337	0.102616158252337	1.16863851287109	0.0362337638798905	0.211422743757764	1.29349359692517	0.199117199518891	0.349053915500904	0.235444033356657	0.0405223059596265	0.315205515673463	0.0175695292769329	0.0260958828787503	0.0076674899907127	0.226587986933309	0.145058202304589	1.09393054631059
2008186	3	1.41418012362707	0.102195293176741	0.239459518143658	0.117610797995598	1.10985132401658	0.0616157421001871	0.220575301844	1.15980428929527	0.206101146676032	0.314996882254652	0.25389383922519	0.048330306036477	0.346194690572868	0.026201158280732	0.0258242504156268	0.00796595500129312	0.200350385739593	0.141306038348113	0.968444692745172
2008186	4	1.38100970490071	0.0796198416535167	0.226769553240142	0.120690143615266	0.978281488044928	0.0717390322558537	0.238586432771013	1.08801373519439	0.200513075584706	0.270043971095102	0.20631918594473	0.0509626268421503	0.364833807454664	0.0402469726003078	0.0255887073372004	0.00848077483437069	0.177166524069755	0.145245295349548	0.790937729045788
2008186	5	1.32186494583481	0.0679878006563961	0.212326975352752	0.117830320206051	0.862107443927391	0.0676328794871584	0.274041321022579	0.942851782117679	0.205220134177044	0.248701346481663	0.121056718893344	0.0532268860769321	0.353170566125123	0.0549123693827559	0.0255786806030081	0.00754245960725878	0.151131972790402	0.137308793468779	0.720842812297918
2008186	6	1.19168629271711	0.0554370655376213	0.20451289696621	0.111737283374438	0.746472320794472	0.0362390194685668	0.3029346464358	0.846189189026565	0.193322817906302	0.253947520302769	0.13463907513196	0.0561759436884134	0.333255117713103	0.059815524820733	0.0238519225429239	0.00557609071062653	0.135180317544178	0.121576636813285	0.559319972314099
2008186	7	1.07553871628089	0.0435584539868581	0.187702904573749	0.107789763786408	0.684813181891904	0.0121088558224197	0.281377838925515	0.781037840294448	0.188600756131341	0.251468379937822	0.148823047022998	0.0595547350306387	0.298941654623965	0.0778777107613325	0.0245005876569721	0.00569627199118672	0.131676861897652	0.119738410090864	0.585528171790816
2008186	8	0.977917096542414	0.0294535582212932	0.168523761946742	0.0980666763800858	0.451320722222099	0.00593075196343848	0.25980542136221	0.686852382485307	0.19010377417176	0.225474929208474	0.130642917157608	0.0605718631897414	0.25582254963623	0.082493783301021	0.0286133075548267	0.00692606843287621	0.13433429170338	0.118156519532768	0.620609068624298
2008186	9	0.878517272114662	0.0171234044390007	0.15265147210363	0.0942166178563175	0.354183402071255	0.00387238712827865	0.250149366634652	0.609102159148627	0.174056041517502	0.19861684181308	0.156110546804901	0.0583371574763443	0.207798554240719	0.0753518495912229	0.0276882427084105	0.00962672262165166	0.136721901429421	0.128850119179034	0.554625630741848
2008186	10	0.790389836875789	0.0125610315235957	0.137485298697992	0.0944092654463053	0.356663700809114	0.00224313939443908	0.245471293462059	0.517422233928897	0.153343721552787	0.180229032034659	0.140103062402387	0.0523473692599756	0.161228534957685	0.0645729803029126	0.0268872973769657	0.00352257541416826	0.142573707194019	0.127619353237906	0.489093710144422
2008186	11	0.715524249443281	0.0120171505706808	0.12209431098648	0.100975263771042	0.421773619186341	0.00208555713999954	0.239162590631526	0.425222670912206	0.139739608744641	0.174023131514923	0.135025148335091	0.045990102440717	0.149768855423827	0.0524166286947969	0.0259662994090631	0.000438642237063722	0.148030534488247	0.127979283360867	0.450656373174433
2008186	12	0.641749401149603	0.0125923000884966	0.104374426448433	0.111000246637179	0.71615717139096	0.00173809991438799	0.22807001441218	0.379346425635029	0.138288153848831	0.173597265087456	0.15848952325215	0.0389530242034322	0.128115721829593	0.0426752768936322	0.0251817914568759	0.000157233155925938	0.282178975025078	0.133267123257347	0.454073052849361
2008186	13	0.556068980019812	0.0143425348376863	0.0873767197184206	0.123500687000317	0.85133937765458	0.00147281922741606	0.197429090402043	0.358445523477529	0.131537365360937	0.173467417929562	0.219317057639617	0.0315421831349964	0.116991518978028	0.0374583001142664	0.0245464314800022	0.000140532132184211	0.366126043622602	0.160437991170189	0.436973454141166
2008186	14	0.484206557569667	0.0195227136061986	0.0811542297433131	0.14229691001002	0.81574837722875	0.000899259129701326	0.172710437619176	0.358961025516741	0.124177014564642	0.172882636782208	0.263849525549226	0.0247715160287447	0.10892434724096	0.0342566470306312	0.0240163325905163	0.000200716833350135	0.259178757304762	0.195126709215272	0.446291253238097
2008186	15	0.44190692448005	0.0280010214046002	0.0949473627372057	0.207301781598515	0.745432676470307	0.000467566506045018	0.160413976968048	0.342853677249783	0.121808048156408	0.161264039909817	0.298997363904453	0.0205794503632435	0.107434194207634	0.0319893584968815	0.0233239182801397	0.000335808740752843	0.197477497505998	0.258760438144434	0.400524826353534
2008186	16	0.43446826158397	0.0460456554897785	0.0929521802836541	0.294477073723207	0.713782435634681	0.000387148529437491	0.160327185566917	0.30385653555709	0.120620386220368	0.142430930931199	0.357887823904832	0.0186830426005891	0.113098729869411	0.0305831082397523	0.022596860737586	0.000421523190943575	0.16832484654211	0.385082649703651	0.377066639652645
2008186	17	0.420160438194761	0.0655984529606463	0.0847952549662574	0.327441016121497	0.434237639968732	0.000242606012751723	0.151349077143409	0.271752837208261	0.121121509524828	0.128826508612167	0.381003524299586	0.0177025023579028	0.12254145927138	0.0289353661588792	0.0219204996580478	0.000416872649356445	0.168754296419442	0.485507697982645	0.3732384464194
2008186	18	0.394684065383356	0.0880438506147132	0.0789636233546593	0.352396798526457	0.252939374365025	0.000161551640872281	0.145940061618856	0.257109744014684	0.127564324598115	0.12465811222178	0.395182985219572	0.0172387070152688	0.156564073940846	0.0268134738074696	0.0209568600561467	0.00097038094271048	0.195942592238896	0.500883931143624	0.382110143134035
2008186	19	0.389227699012444	0.119377647544232	0.0675977055950412	0.39642618966955	0.229563397517722	0.000143134572475643	0.155870791679458	0.246011836930222	0.134427883597055	0.120501311944393	0.375569239470589	0.0175113459692795	0.265324490700425	0.0248258296631362	0.0200693331866412	0.00215692637531972	0.237431832638892	0.538345847940077	0.370584149485409
2008186	20	0.43902983666996	0.148683251609677	0.0626036740402899	0.386584752383101	0.214768003973435	0.000189369405950598	0.16396161743916	0.240368272432553	0.142106455495392	0.119335345258773	0.272908155514053	0.0178294494501064	0.307831571820759	0.0240376012095154	0.0196083335040041	0.00421239306192855	0.288654134759321	0.913855087485227	0.265492296816369
2008186	21	0.557030162264754	0.180447789395919	0.0600186558317468	0.377708547314239	0.224216371325794	0.000298863086958042	0.179019445754708	0.230971662606428	0.158545810412368	0.125770157522863	0.158514480725991	0.0166786266323391	0.273308515541247	0.026574754039629	0.0194476827669923	0.00548936569873297	0.333931666324063	1.36679235823833	0.24601278304089
2008186	22	0.545681076435916	0.232229307919858	0.0590458701651673	0.34565890668288	0.254940761470369	0.000325085053232967	0.200339800379037	0.226193967118869	0.184900833361524	0.129879222858702	0.133242164382713	0.0146304387590322	0.220076274406487	0.0379568194073955	0.0198205260264354	0.00324481837162114	0.338889087344862	1.44667720091346	0.2413666105201
2008186	23	0.436561250625439	0.238676094566951	0.0586510193010673	0.320923512910657	0.285006040438564	0.000440841666845556	0.212343811107635	0.252638296872113	0.224437442226191	0.130387959668285	0.214052007834122	0.0130197085160839	0.195680780158263	0.0450753642193351	0.0210005766042416	0.00347157092829081	0.320185683344269	1.19487464683204	0.236590929424395
2008187	0	0.423316368804768	0.245665828112006	0.0583848036374211	0.294746289545463	0.311657986285591	0.00102908602494216	0.211913626669384	0.344090716379541	0.308694325084149	0.12677573317363	0.221201901924559	0.0134828311391117	0.22449608566311	0.0458485413390458	0.0220406159154312	0.00355297317937457	0.33762328422621	0.800528338291312	0.220508538892678
2008187	1	0.454717091220053	0.225260998484312	0.0582540575468714	0.296715762121228	0.335767149572713	0.00589101874607314	0.200147484879615	0.524879225711335	0.425580679011495	0.120152098183432	0.286387409117433	0.0139828875765565	0.348041164240841	0.0455253387930251	0.0228792462649296	0.00445458220562546	0.400614892863922	0.372467851841449	0.191252297219391
2008187	2	0.481971593452803	0.227873269695588	0.0581487965191546	0.319323126633478	0.335939028329781	0.0235528432026042	0.203810164354559	0.536269520066793	0.494199553620526	0.117441826973772	0.314922857082511	0.0176223294774605	0.652691281042756	0.0444301736975233	0.024861421582143	0.00521309211909362	0.571113451921102	0.173202115617165	0.179392854048446
2008187	3	0.636426617742836	0.210049053456822	0.0580289929191181	0.363739574897658	0.353832166102136	0.0675437004328478	0.183598375522857	0.50041469561561	0.374996943027848	0.126013831669534	0.328832263012328	0.0291268705083784	0.805417215737425	0.0434891638688146	0.0289071712594931	0.00326852085109054	0.643476019626151	0.149201149188167	0.154055291313399
2008187	4	0.796231339756976	0.191070881077904	0.0579721592993001	0.425503913565493	0.398776084546464	0.131101628973289	0.162288702965055	0.436101609527961	0.194801550390449	0.139720098245787	0.341493425090525	0.0378239807218158	0.675260514232397	0.0423531426684438	0.0348596434503443	0.00182082688457799	0.539868214804742	0.17198267832881	0.13816644053322
2008187	5	0.77543064115472	0.182693291470906	0.0576950242278309	0.451212697413971	0.480860758684151	0.18729472980037	0.151934789101676	0.384165344711838	0.150389043716743	0.391293021009179	0.340936928049132	0.040909846549222	0.431874758324509	0.0424602656584088	0.0393329773302124	0.00421473018749717	0.322592879729683	0.206909562335309	0.136061830770466
2008187	6	0.658251979163555	0.179695189040261	0.0570113190910258	0.440949441477076	0.565774030256423	0.247513905623978	0.151260032018225	0.39179571293804	0.15776079742665	0.95443375012931	0.327386450854046	0.0361227791911195	0.415542024808579	0.0338693520460392	0.0413094513950585	0.0123215698604939	0.220244310190277	0.222123974628791	0.138002433460459
2008187	7	0.760526853806416	0.186005957691418	0.0673752420210235	0.466954332580941	0.52516511094006	0.200293345328214	0.223869978406825	0.460323789461316	0.184186309117545	1.33296943403927	0.287270958641909	0.0296003210890532	0.498188660877385	0.0270711097739119	0.0446188411693631	0.0388742211295421	0.23252085300841	0.219367497537164	0.127433433316951
2008187	8	0.949223778548977	0.195041722895605	0.0766761872479591	0.49710503165202	0.440954327744885	0.174400888478579	0.327146436069262	0.531247614839224	0.214260762782637	1.2425081652241	0.226461715125115	0.0243370980088924	0.553222491875981	0.0226608859952072	0.0447583049688589	0.0797523260392678	0.291420846484286	0.212309712910852	0.135114234833215
2008187	9	0.99838568478777	0.195675704294836	0.0859204511451436	0.497298112448849	0.366763530781928	0.169998794173097	0.433083009550325	0.620899395299106	0.234375524591165	0.895428295391195	0.194004985169079	0.0205493930536101	0.564454212900428	0.0202197438953677	0.0446156762163083	0.105193315131746	0.40674551046039	0.192383761531772	0.137461418692632
2008187	10	1.11600031913235	0.191924071696477	0.0768387941183944	0.466527833219178	0.310242567956109	0.175658369518717	0.423024459033321	0.677864430827769	0.24712596409948	0.518100783969389	0.121079795405651	0.0186783774395198	0.564958250545202	0.0196555022378815	0.0422475050824327	0.106261923118422	0.353754378530466	0.171867412872682	0.164923222705018
2008187	11	1.13957697067776	0.190159566713898	0.067760662728627	0.418784412275266	0.280632653388494	0.176708558471829	0.365606760591955	0.722821720544082	0.251739417898861	0.422899633687635	0.091082196042673	0.0157733460988181	0.53727521444527	0.0198227928046302	0.0354823854727686	0.0917202335050543	0.264024537655607	0.164032925226914	0.159491791250765
2008187	12	0.913453059467702	0.188832441865014	0.0620497413085966	0.355561296125449	0.260709588230971	0.16504861105109	0.30864956587784	0.847832403758752	0.254863036563257	0.357823298368989	0.0953264242147481	0.0123578496747527	0.410254907455746	0.0216094182240598	0.0227963270774104	0.0751730465579344	0.204643716242587	0.163510092996129	0.162748850658133
2008187	13	0.686959972310404	0.187828041096807	0.0607275692425009	0.301521060690497	0.245158552517249	0.154925065731452	0.253421364965763	1.12921293309747	0.258184041481713	0.304845697568137	0.105261001904343	0.00937119818247485	0.340028790489283	0.0219045371910988	0.0161920683881443	0.06345761275992	0.186142673368155	0.165325405131054	0.149109440675244
2008187	14	0.502271195842576	0.186370519137141	0.0661276382600657	0.257967319158033	0.243484446017409	0.148253014352633	0.211164744445862	1.58617751940944	0.250837530319387	0.297106711738813	0.113304283157316	0.00636883093930206	0.328953860922858	0.0203217673010622	0.0118250284114511	0.0576085285486458	0.205802506200308	0.170553475355701	0.100792492976922
2008187	15	0.404456265313563	0.18271192666295	0.0681196596747096	0.231202699545134	0.253402278838313	0.152079737136217	0.165216000654248	1.8496935214077	0.246424814737699	0.309136475426379	0.113180452205834	0.00398587856172246	0.314407066821556	0.0196401894261905	0.00884717713781106	0.0539450732435404	0.276897224001446	0.16713428901584	0.0381817918249932
2008187	16	0.492809952540792	0.178406511639792	0.0653674494749134	0.206227582183586	0.277198798959927	0.166364518253955	0.132691378904648	2.03077365709932	0.250320363460864	0.314564708315952	0.107256230098144	0.00313299137317155	0.278196928200252	0.0190978362810644	0.00498210451413487	0.0522655215104594	0.377338159417153	0.162003596338236	0.0225354009122481
2008187	17	0.519399500664439	0.173416210508112	0.0597811918238707	0.193038756777598	0.308182817700304	0.169641645738283	0.115094108457055	2.1767603442071	0.229772709041519	0.31730425871173	0.100329263094105	0.00312352737471383	0.231231964358333	0.0185327306648824	0.00441618944456637	0.0627955644380757	0.544335106056616	0.172243048669631	0.0208233698821207
2008187	18	0.412255839943337	0.166021486232578	0.0469779448110922	0.177842353348993	0.340812743474296	0.160136105080266	0.113247304801598	1.83377807191759	0.191556257518431	0.413839280447853	0.0953144465136227	0.00386350934864487	0.193160440863367	0.0181306814875741	0.00518245855691514	0.0837764787069473	0.840837861497027	0.183291839216424	0.0207195654946651
2008187	19	0.378674588966735	0.156259448319562	0.0446266636412522	0.171605450721331	0.382401325309745	0.149977740799374	0.124928827879786	1.65182058698098	0.171080716490867	0.65426423286178	0.0917069016082587	0.00516815848565666	0.178686113968485	0.0188434831720486	0.00590303453126518	0.115542907185389	1.13943664903613	0.198909703962617	0.0233026016971594
2008187	20	0.414841504136111	0.145845496640948	0.0467512298596317	0.164965514924109	0.458193425312492	0.143212271335752	0.138844164904758	1.51033644831599	0.165874538895115	0.89784310303714	0.0916161839356807	0.00545504656128772	0.14601637359699	0.0203515762419227	0.00807582377630957	0.143158187801041	1.09947387464224	0.234946216451085	0.0324030605031551
2008187	21	0.542740703105912	0.136048740297299	0.0494045177166011	0.155945190637579	0.565026579717387	0.135539959558175	0.143517652095016	1.52191963779417	0.169985937599982	0.946637734326465	0.0941368296388956	0.00466057452263877	0.165194351728707	0.0214007170690155	0.0118785506382251	0.160192307278415	0.934468887130495	0.277611992993946	0.0405579467052671
2008187	22	0.625924058099299	0.129133175972733	0.0499338115170994	0.148575951839166	0.634948202800738	0.125751203469409	0.138701506763743	1.5118543901436	0.179745044011956	0.776208807161266	0.100821936648398	0.00403055118514977	0.198412350231641	0.0230558051870822	0.0181853483150701	0.169375304953472	0.806483607386313	0.327638727682811	0.0464582065672886
2008187	23	0.630114682241413	0.123780364289172	0.0490480640942888	0.141936543391828	0.677769418702279	0.115510108736322	0.131544851419336	1.50720728257976	0.199961917315274	0.674188331437775	0.109587894637338	0.00353696178573569	0.242493250011064	0.0295715924324612	0.0429660302841806	0.17032813788562	0.739912308296037	0.36690192280378	0.0518543628708157
2008188	0	0.821950315095948	0.120026199472928	0.0481315462728313	0.142878313966619	0.708530272218345	0.110191497746222	0.127192002175736	1.47361033485373	0.229412357409091	0.723686901409666	0.120263596156637	0.0037662510731932	0.290268417450239	0.0381883350665242	0.0741475210592469	0.182489576713629	0.682701840224022	0.396783289338425	0.0768076631270668
2008188	1	1.14012460176476	0.118533920914061	0.0474346515869401	0.152197207371392	0.749476222536531	0.112364383131787	0.160232192094758	1.47646685901257	0.261508347446251	0.906919369955471	0.131759040660117	0.00431369049708821	0.350517456210587	0.0724653207193636	0.0867486805178974	0.16485992398774	0.631895219050283	0.420661160338051	0.105784417858145
2008188	2	1.42703820555617	0.120223260634547	0.0469241922289665	0.159588838412454	0.793633240271146	0.107837141209292	0.181112513830928	1.48440055084706	0.276122513814995	1.13666682804159	0.138154669204195	0.00452181203527636	0.411948488916699	0.0831025496763016	0.131519743684539	0.148492689632761	0.587007829301388	0.467593264600095	0.186484242196241
2008188	3	1.90553074828846	0.118336158529788	0.0451666822171184	0.157228210456434	0.75160094816937	0.102315014034985	0.243962111906251	1.28185593944547	0.259321941118837	1.23284333028767	0.141896966737381	0.00424724000061486	0.410190270618283	0.0425366697842814	0.232607644641014	0.138672611681669	0.558971368047139	0.541631045722179	0.548811131102891
2008188	4	1.92055498336253	0.111683177851458	0.0753847733328418	0.149150650830489	0.696113064702125	0.0969117615267497	0.296253372058113	1.19485659298725	0.239846693566871	0.534865050913039	0.131839823913736	0.00293176851273201	0.40753900917039	0.00717107010298438	0.324271583527646	0.131199999473404	0.545333699580837	0.619646391762897	0.587760447352587
2008188	5	1.2727094934409	0.129282314733253	0.091980303971257	0.145869603335611	0.653637587308487	0.101554752789603	0.320081116681129	1.00616408636103	0.238234340269553	0.394327770243906	0.112448499494652	0.00125937202004556	0.418001638439501	0.0010980145105464	0.41251694107874	0.156180671472386	0.545342504627211	0.595950675882828	0.688108424168926
2008188	6	0.464604748075483	0.1343060139465	0.0711487796251201	0.145571075688529	0.647231387435755	0.102923664650461	0.24967733075513	0.867543332047434	0.288731402491967	0.359205839125761	0.10057238162365	0.000342124967565871	0.425800654726239	0.000475502629465361	0.44935922431318	0.179075884708888	0.554372692539573	0.587019431099461	1.09770364658152
2008188	7	0.290214529382096	0.111338852003242	0.0715340973371408	0.15252336747742	0.548426644369871	0.10390890263984	0.298606321036806	0.734378100768724	0.433669947905944	0.343129709537979	0.0923377850232755	0.000430481914433578	0.311778631485079	0.000394857378693549	0.39434542788131	0.164760614425323	0.562346846365676	0.551777792457702	1.12646185846706
2008188	8	0.310203360156901	0.0936513441290297	0.0835458069337384	0.152374401631074	0.399777027454845	0.0969878089353607	0.319996906715065	0.614834527931026	0.361716863083825	0.341047590464868	0.0867733582327683	0.0020814162611732	0.218618313377774	0.00033856126626583	0.319093098597555	0.148786522506651	0.550856542493522	0.4884531593109	1.16581201555633
2008188	9	0.740515583187353	0.0854067079257627	0.103483683801645	0.154082697253838	0.311417025497664	0.079005954469427	0.328471800152712	0.502286420665144	0.252488259533516	0.348155184100054	0.0898291242925758	0.0063794654292757	0.172158386064116	0.000369697814789337	0.240360363889216	0.129182783912641	0.493355113406274	0.425354814304861	1.15926168968612
2008188	10	1.73184749267208	0.0586295316687985	0.111568016308277	0.155689482035447	0.255108769975817	0.0675715148896976	0.337969103534786	0.399277925226001	0.198182274928802	0.352995337205387	0.103684466563384	0.010011919689578	0.143141299957458	0.00109592420041656	0.184900071484252	0.111609974393278	0.384104800802434	0.363110858497808	1.34704799701947
2008188	11	2.94041544409114	0.0457187495645448	0.119266416375639	0.14831684505398	0.223075538610861	0.0623815586292253	0.338005976270288	0.331802128646229	0.194095467439226	0.302730202845686	0.117700394242397	0.011260052660068	0.130610289382741	0.00308473146232783	0.162354658323729	0.0988399332723851	0.294919168109007	0.340237700459715	1.27658356748582
2008188	12	3.61201714077995	0.0614420044142919	0.117257727349603	0.116970759829258	0.212218785666787	0.0638554520560887	0.329587020231674	0.277232110260627	0.207923953374588	0.247541766834112	0.131628066841453	0.0120150181286045	0.113249702343425	0.00588852583682147	0.147759177216057	0.0963888582588324	0.263254037829497	0.319742241925953	1.04000394537295
2008188	13	3.57435298031913	0.176823684204665	0.126706829307568	0.0967897405795737	0.190235284678114	0.063211485825823	0.244473159427192	0.25601309457255	0.269141090951283	0.273677597753223	0.142188689096234	0.0120748529816694	0.0877711468030717	0.0103118086545239	0.137218091434801	0.0878801381044659	0.257430144969675	0.331267953499044	0.885669402875284
2008188	14	3.43604696686216	0.234112625172734	0.125565312456628	0.0774442237724274	0.128604220724468	0.0579396116289732	0.195386185812698	0.274795700853154	0.348573542436056	0.872158716789721	0.144203240030641	0.0113978063070809	0.0466180223100098	0.014352573718985	0.132716621148797	0.0879851230738659	0.251996626606158	0.382166491025796	0.83944438137502
2008188	15	2.72233473265654	0.248373507439525	0.115309017190419	0.0583812120081541	0.0921800637490594	0.053124780310853	0.182752893318874	0.330500298894474	0.42430158784924	2.1058019013384	0.145775425895011	0.0107329912097757	0.0195637044694013	0.0184923160267317	0.128970782679623	0.0866487170969292	0.247438637272398	0.393439538070474	0.835724346543956
2008188	16	1.69228822840732	0.275030889807942	0.0912508488273595	0.0461460866423991	0.0676521558749866	0.0459840558433057	0.405825828969925	0.461758333928956	0.519633392696971	2.76982168375212	0.14705842515273	0.00895447701033314	0.0173344225571582	0.0219757592424938	0.124981588263903	0.0808260509780692	0.237216435855435	0.424617353153477	0.766618292367865
2008188	17	1.08912746702828	0.322123737043971	0.0650721867607247	0.0381339463647397	0.0539807449227972	0.0414825685831013	0.927047485245457	0.604020990161829	0.565655034790281	2.72377570792365	0.146554744438796	0.00635038814103025	0.0187450038623004	0.0271211006838564	0.125608111988054	0.0702081037320856	0.21767839290383	0.42687341964998	0.744967627983464
2008188	18	1.03731275258086	0.327716712544529	0.0352808598090119	0.0489141501049341	0.0768460587195754	0.0475757272092815	1.34724963782628	0.70034504336474	0.524746038573499	2.49101085151413	0.145187224744728	0.00451095104495707	0.0245817039703996	0.0327325242742179	0.127114346988439	0.0557668834198677	0.187586292577896	0.432027070455413	0.688695767640692
2008188	19	1.04272126891159	0.307352268304011	0.0222542084222699	0.106723662944154	0.1460759596256	0.0835790315958418	1.4378445944735	0.738061194007677	0.431556499734794	2.25388691016482	0.144819411178875	0.00470388575684709	0.0171233271624691	0.03777704892139	0.108688631188018	0.0479788264749809	0.157567017383971	0.463250300877045	0.584677095301467
2008188	20	0.967061807598606	0.29005755267753	0.0270676065323715	0.180238543694363	0.202846890761619	0.144373166701947	1.32864559878604	0.626509808270604	0.379549758661429	1.89786888170619	0.145636655953509	0.00496594630310219	0.0137668575359876	0.0393081934693705	0.108915689285804	0.0467453685020833	0.147946180364773	0.475807239644174	0.503302014920802
2008188	21	0.888040048274243	0.279202226597402	0.103150404129595	0.226103238289389	0.209474049485034	0.19637688210805	1.16774953554549	0.522504576619957	0.337065274760477	1.67287000668531	0.148665765834284	0.00521542146323993	0.012832144498162	0.041836863614559	0.111926131429412	0.0474628869638236	0.147222919652178	0.390700379468314	0.476037293267683
2008188	22	0.875033190154862	0.272802700974376	0.146184145530976	0.238016112181904	0.219358396430513	0.193685958342695	1.16231945155247	0.489951222678846	0.383687344972931	1.19601382078496	0.154193489762358	0.00580876465914932	0.011458485769841	0.0462723110261911	0.119875962500508	0.0515955474854297	0.144118448582668	0.311636478826685	0.522051951229175
2008188	23	0.892810149860623	0.261475184189722	0.189914758764688	0.237104216622015	0.245468610353585	0.185249502237847	0.999107816187785	0.451656487592212	0.703185416196903	1.25647619883612	0.161455838264072	0.00646346614785093	0.00752643222511363	0.0273202874141161	0.120459722521328	0.0554780000843057	0.124075967374666	0.351770841297124	0.650452137622473
2008189	0	0.857331033748307	0.247262822847743	0.22346417152301	0.24380429284007	0.315227571339331	0.177608641335606	0.894309999104803	0.406127540198794	1.12656416068618	1.30499233064692	0.17085329838502	0.00617296344733176	0.00421834661308173	0.0134941648368158	0.121538451796651	0.0565889832538027	0.0999620874908949	0.929053664306955	0.734293619877503
2008189	1	0.80340620779354	0.238695744884558	0.231684504678609	0.25105823168668	0.379103223093855	0.170443316416508	0.859383569179466	0.407449817291391	1.26165281285729	1.11927455964951	0.178627130088836	0.00616182579445247	0.00235716314726759	0.00546503868663463	0.119517598897447	0.0570635957324023	0.0854843039454234	1.71366163231295	0.748926353791544
2008189	2	0.821100781421158	0.2322049721548	0.223359272694246	0.253706843471569	0.374551015533653	0.162897600734678	0.851237817857946	0.43591726171249	1.25536504242047	1.07579290698298	0.186730386974532	0.00669886021579128	0.00210235747800667	0.00242976984664451	0.114093874863134	0.0556790908676618	0.0694125704952658	2.02321659942756	0.719866670735524
2008189	3	0.868892167599762	0.224314650241259	0.206681433568832	0.250002865015398	0.345757017951755	0.154969738271087	0.810982040198173	0.442618269593734	1.22177789577077	1.06564163079364	0.196087514541839	0.00805832503914002	0.00367619934316571	0.0016430562871886	0.101866758703357	0.0552803455542279	0.0545582890185759	1.99715768053357	0.826521107402416
2008189	4	0.979806743837777	0.214431543636699	0.1948870991889	0.247490875817959	0.330928558249731	0.146038051722522	0.748492538501646	0.480447945115907	1.16131927110518	0.937430108370081	0.199225416492069	0.0156055599098939	0.00693798977078118	0.00137138065444192	0.0770138804581035	0.0338536520356821	0.0673333469226025	1.89498176635097	1.0075249017747
2008189	5	1.08636521071874	0.201487309592642	0.195733053289948	0.252411493621409	0.323432498743201	0.166924282617148	0.697399506902538	0.482465626381742	1.10597542139262	0.806500826999511	0.181994780048808	0.0302756338528698	0.0347964649872861	0.00238285815757767	0.0563379157516494	0.0104979492897677	0.144536318954153	1.71796150844784	1.25232837539064
2008189	6	0.799636801369756	0.197577990201089	0.20704689711119	0.25140532069017	0.305130959278591	0.218734527708009	0.828707728348251	0.415245046729715	1.05980745990625	0.822278567391088	0.163020937189789	0.055802805386447	0.223487092253607	0.00607739521443743	0.053076254905686	0.00404222380401044	0.230724845357987	1.57606392506008	1.42890483307225
2008189	7	1.05423721812428	0.20555816682978	0.158778460143848	0.266221159007838	0.291685111983019	0.236341267205798	0.673363858584632	0.372813401794926	0.932110904626617	0.680559891145126	0.14522710814528	0.0850592802129174	0.470841730975996	0.00883184923385417	0.0556303339002268	0.0015988439776501	0.3029743348163	1.476916425227	1.4203459503436
2008189	8	1.68310825473523	0.292056943955455	0.0598286077809889	0.288020684910429	0.307512884540989	0.23677821160674	0.549257498149217	0.348881963790627	0.772472313752899	0.659504355119452	0.136919748254871	0.085537178574336	0.469058815984769	0.009525352054198	0.0500792757125983	0.00152089700249568	0.334730690181877	1.37534843115084	1.40165049023445
2008189	9	2.13327249318052	0.273869533033804	0.110574386087344	0.268658315999013	0.307633411867851	0.264519697401835	0.514560342652421	0.398859067514503	0.702360106769735	0.790487646756304	0.136250872819208	0.0808964349809367	0.507818416154348	0.0120902422832319	0.0473479719787008	0.0015433868675746	0.344193506832608	1.17245293714694	1.21079757138684
2008189	10	2.04175241203315	0.212995731525289	0.153219780714087	0.26669795502909	0.283624570482848	0.284661378574087	0.523637453467132	0.413177287113601	0.679867252246302	0.762788618800885	0.142287078871099	0.069724050235662	0.573638118108509	0.0193981091428336	0.0535207164430397	0.000708154107910631	0.350023706519789	0.978589408367012	0.979378217105265
2008189	11	1.80621193184706	0.213515502502506	0.153383952019062	0.291138835996746	0.268271407478843	0.240592774902261	0.440857328630535	0.391460001150552	0.641788671349327	0.840952750310744	0.154290336204855	0.0587033973789043	0.563073111700762	0.0235349132411137	0.0701789609824912	0.000697211141410329	0.34438571771393	0.893883243024222	0.753832618595116
2008189	12	2.12232185300855	0.240898471168548	0.139171686528117	0.295959662462419	0.264290286157584	0.181994396142621	0.337759410130248	0.373380656497884	0.607318763637491	0.948768319755682	0.155144990189872	0.0505939552118518	0.531845114696581	0.0258810392017013	0.08386657448981	0.0016706179718597	0.335329408483292	0.861066361903096	0.666018974735922
2008189	13	1.77351197294773	0.269362406215859	0.124734342782484	0.266113449356292	0.253257737047087	0.167408718511287	0.298055462926195	0.340124430532261	0.600943633920302	1.11717140364018	0.152474331049689	0.0466684199145484	0.519402114414997	0.0277689115077857	0.0887956361243053	0.00451948722885669	0.324906282959849	0.812780415735144	0.466522639169254
2008189	14	1.62200959035314	0.283240713028307	0.117049415148837	0.220896047756349	0.247138918790575	0.164352306782637	0.275587860618252	0.342875021708451	0.607393257773818	1.23699965193431	0.151497659129539	0.046961320870338	0.396580644472048	0.0300520882599401	0.0851507416433644	0.00918152378822004	0.317843994141416	0.749918539011095	0.339745277826322
2008189	15	1.4701717560684	0.30139225138234	0.126498770475483	0.173255053606019	0.246233501386039	0.157127036668583	0.350478621045689	0.377012779458298	0.597902806360493	1.0775685091475	0.163727086582357	0.0487510582323597	0.307850426897912	0.0298978557702467	0.0791281230627785	0.0212551463381368	0.311985272592251	0.725802171839685	0.730932363823961
2008189	16	1.21192720395682	0.293613125332532	0.178839356005197	0.168044443080864	0.240019528130989	0.163629805105236	0.488952758470713	0.445752349013774	0.550914958966741	0.792788608918469	0.178778165999356	0.0511147978613471	0.231988246104511	0.0295187971098431	0.0676752129249686	0.0359972043846483	0.314018796003735	0.731133977447964	1.81358370714953
2008189	17	1.09964736969827	0.322640663895188	0.156886077240224	0.167957831661686	0.208520908214738	0.166878365177723	0.540141681672973	0.539325294332637	0.506635346407513	0.583522305312832	0.188193078857064	0.0554991328130953	0.168494243483803	0.0305947159287811	0.0514338557921185	0.0530817014524776	0.325592564721713	0.761675123439375	1.94379592632601
2008189	18	0.918563385930073	0.338577372871158	0.122851657178774	0.159273052822805	0.178264496501675	0.167238751473595	0.457682876224881	0.614859352449404	0.481299378774166	0.486936244356625	0.207642330983343	0.0612542187813915	0.150933219923733	0.0306186988199759	0.0467214793674803	0.0696094425550387	0.313672513308821	0.851962673097372	1.83635836927205
2008189	19	1.08703009309133	0.359098926425648	0.13897357422526	0.15205722569007	0.18782461573766	0.161299636308966	0.387333669865007	0.620319656484105	0.480308088143756	0.477769193237014	0.250074158186778	0.0675195913526525	0.166386883278723	0.0305026385944582	0.0433022379812817	0.0846723220785155	0.267622497853831	0.878324902062272	1.65069545440764
2008189	20	1.59838175612302	0.356688323283655	0.195481401888896	0.156939327031143	0.195981413843482	0.15160344841412	0.372728409739504	0.498856966323346	0.450226603810019	0.508649628210357	0.265559124689001	0.0689677556002306	0.186550918821418	0.0298225674542782	0.0419963687544745	0.0915121670456522	0.22747672091931	0.819422061882858	1.43223739266529
2008189	21	1.59265363045134	0.294495461931615	0.239533886083555	0.178643285848989	0.242969219826927	0.141823459237484	0.431666172158989	0.4539460537736	0.389916458642057	0.542867572261365	0.243232709807873	0.0633754977224464	0.152955124822703	0.0284761978820337	0.041349031603237	0.081190110497315	0.201508805208745	0.709231305186328	1.45024045469677
2008189	22	1.62919216547959	0.226179871962904	0.284952016784219	0.189842572427173	0.244365848704023	0.175858319215578	0.55911887052338	0.457786737814124	0.340041048546277	0.422351818769104	0.231728636947699	0.054430104712957	0.121077531319969	0.0259215505232034	0.040601905679045	0.0725214452134466	0.185570551672517	0.639338542072915	1.57923223288295
2008189	23	2.43680024125908	0.153432975131545	0.384691922361957	0.200356006401582	0.249086917707366	0.216015062018948	0.549455924911568	0.433279770506979	0.361564957871131	0.350074245020224	0.222736960856694	0.0463954687735542	0.0928293914338143	0.0236239256500456	0.0398274056228083	0.116107220923035	0.182053118020491	0.583629535247302	1.80608051107884
2008190	0	2.62743603351585	0.246729347622764	0.566878079952476	0.188776559842129	0.257536679671323	0.22153579988722	0.44355209708849	0.40935719734763	0.37464449978197	0.353344796643196	0.226041198335081	0.0419212502536626	0.0927705603384961	0.0220244068636095	0.0396478301685001	0.237379137826809	0.194257928437518	0.536058926722131	1.95680412903137
2008190	1	1.84871651750728	0.420077433534837	0.617203783318047	0.175934895988742	0.285338113723879	0.350586314439568	0.346399583004154	0.311926495729146	0.378647823286803	0.348851972699635	0.232499462732939	0.0407391058634197	0.101887230766984	0.0205136271558974	0.0329652378797261	0.281222306898756	0.189808438435377	0.499756953294527	2.06464087973159
2008190	2	1.58176114244712	0.486999099145154	0.748832267093288	0.14598159614301	0.297668266049605	0.364505405474663	0.317374556806374	0.536170426013518	0.348720603765921	0.390750785241069	0.237930435979341	0.0397015459379049	0.109965459995818	0.0191801951223726	0.0047361118575393	0.283805042541266	0.184286527786844	0.501808678526245	1.94162094143528
2008190	3	1.85552902509373	0.456205614553441	0.855924461286883	0.16366429752915	0.272698965833425	0.388149167188792	0.332081380636564	0.908680206825165	0.348986325548858	0.677054667106696	0.252171582807137	0.0389606109049783	0.116046499704644	0.018485049806616	0.00461582377792527	0.253454842620649	0.180141799794143	0.48550243990408	1.59436325314521
2008190	4	2.33903271780675	0.417830576831872	0.868486358162447	0.300226284960581	0.263061225028228	0.351190901435906	0.413407850797267	0.820696983263541	0.380206293711813	0.955352188216259	0.224136618449212	0.0374458678323665	0.127515972499276	0.0198366760530925	0.0256961873834914	0.214763182903085	0.164360400572775	0.475140080117089	0.845748841338434
2008190	5	3.54168506623699	0.540992177776384	0.7199859190762	0.415858424484189	0.513275388359488	0.269432648715463	0.670169020363661	0.740047129975523	0.436412487952385	0.810011459554049	0.18794632162981	0.0342714456701815	0.146462489798547	0.0263263615246033	0.0558833365357561	0.275412869998585	0.136114053641457	0.466831975239962	0.954709139070184
2008190	6	5.44576424330789	0.70195616537544	0.703463265698109	0.373753168912893	0.694774332073872	0.227913653005336	0.725719011234283	0.793459346225846	0.538528923467975	0.516900077991481	0.174859387693512	0.0303592453610023	0.157269957823103	0.0413881145313062	0.0933408841856136	0.317940588787504	0.161657320132279	0.407263178112072	1.50664442152744
2008190	7	6.32208164515655	0.625844757716284	0.719016046668321	0.30675901058447	0.685664107030842	0.188105523843112	0.557539038783242	0.613763096238549	0.601754898093937	0.424290530312186	0.162925846063396	0.027290578718585	0.165153286369365	0.0496602441167253	0.131085144298227	0.319138949550827	0.234118705376119	0.365440072574427	2.16774071176279
2008190	8	6.97169457214055	0.553123137645778	0.803979962830127	0.478517023149872	0.674634693874974	0.149840232154326	0.3506015628777	0.676310020915655	0.689840542617562	0.418692537387111	0.175515816939525	0.0243664744936785	0.167329780235247	0.0529259273273551	0.12278938552491	0.275001814249855	0.335112265517732	0.366347693336873	2.19819277990864
2008190	9	6.98033182423626	0.558167258598556	0.900957073535719	0.604992564369185	0.705795037836372	0.222239495317765	0.238216617808251	3.14402234149747	0.85179232618946	1.09788509087556	0.204760946988795	0.0219200020102691	0.166492947210852	0.0484735486824905	0.108283261690837	0.21696686245287	0.387912716245255	0.413504896931783	2.18587699615009
2008190	10	5.90105731392034	0.535119276095113	0.868060230720132	0.55729479814792	0.473220627901716	0.445116734474805	0.395254376542861	4.74112609482302	0.897456484463407	3.06385211938697	0.223531192331072	0.0198433721432841	0.136608823882008	0.0419578039821684	0.116135243283196	0.15078756942617	0.355252453324783	0.526857204990306	2.1056317302759
2008190	11	4.84399722450408	0.397814830933812	0.680874045065746	0.487024679492626	0.702330223764975	0.499763233863096	1.93231282965344	4.44064614458291	0.87607330351939	4.53365176022405	0.219800179099231	0.0213176744425737	0.138660151156056	0.0372714081901922	0.131320290656144	0.109013047044603	0.287074459880921	0.699189819003332	1.61634857373532
2008190	12	2.9385153155754	0.415725541063756	0.4887346159419	0.482417190988729	2.4651881360945	0.476801871198673	3.57942589679213	3.29523338871502	0.700939495845209	4.97693463525764	0.193455665715755	0.0249573789292395	0.164847393060357	0.0366550226340092	0.155026990802218	0.109787042525701	0.276568995389218	0.834978386164207	1.36069281202322
2008190	13	1.86219856821036	0.540974821236766	0.474632800687324	0.510066362886883	2.43925071151955	0.424852467898695	3.63605640769316	2.26151311347587	0.475357110437977	4.76241796158525	0.186917871041612	0.0279140754404033	0.175035143419888	0.0370251162941715	0.232153807056667	0.126467216921116	0.473885610696784	0.885430582419139	1.33394939243632
2008190	14	1.58311012318532	0.532710699842817	0.454859129655669	0.436332052420855	1.4011860588344	0.419721723058978	3.27674004232642	1.31225738403359	0.37803443382652	4.35791047815928	0.209429611921796	0.0309978732522352	0.167783210961928	0.0347488655982623	0.216004663197022	0.179567954107993	0.672152001219498	0.893006193910761	1.56244814654337
2008190	15	1.33481913957273	0.546927923821983	0.434794914287054	0.35668231458476	0.816646711443011	0.36950479707318	2.85541550446872	0.707961893346167	1.01810630331792	3.96394746667104	0.238218500620605	0.0340320223759162	0.100733952447095	0.0320048176280165	0.173484840099252	0.235565860549786	0.56431790785925	0.793939429253994	2.02231461291871
2008190	16	2.04166246869367	0.561566590951351	0.693643628663296	0.333814601531773	0.519883951278885	0.231153673743837	2.47269407936498	1.20981258002959	2.42655104513604	3.74954313782724	0.253053387795196	0.0444356816612814	0.0430960729657079	0.0293094933378051	0.161978277002921	0.263083701764885	0.54145253023693	0.676314273530136	1.99767810609083
2008190	17	4.41465871930336	0.587785414077737	0.851584428735402	0.33223245150369	0.388603319744612	0.0637706874546158	2.12350812096096	1.87923442939809	2.81197684670339	3.73690594406589	0.246097167835377	0.0483532410170287	0.0910747996865814	0.0264840743226399	0.16483796968924	0.293103927879263	0.524236570301898	0.636456104024453	1.83320733270304
2008190	18	4.94340135385244	0.687960282421301	0.771026451896561	0.346547181090206	0.590456314523701	0.129901219419536	1.92929516810065	1.80138124472416	2.69284668902809	3.36015867198795	0.230874353746362	0.0265298707366863	0.175094485041419	0.0236899078320804	0.154713094067404	0.296954224207216	0.472742138719558	0.524950742368523	1.79446820705811
2008190	19	5.11794961439382	0.541128249015821	0.696193980507184	0.358087300889267	0.838751739633053	0.198496668969985	1.65109997366887	1.94547871153018	2.33176245270652	3.05246405580873	0.219076885286201	0.0149066574271702	0.220229852780146	0.0213818763691225	0.140283344905016	0.233066394612642	0.840861110879822	0.537590218705132	1.79511700181953
2008190	20	5.15858801641974	0.368867619774955	0.578181311771863	0.40637705423736	0.748263931231283	0.170974315758582	1.44322496771279	3.24997115239134	2.06419082470517	2.93462476023789	0.211167993220166	0.0153166994211916	0.208913717191383	0.0198183773834587	0.115101893200999	0.0577311630781091	1.96923590395243	1.11472447822077	1.78646585728435
2008190	21	4.44222600890933	0.324756740669238	0.484145188068908	0.513367544578784	1.04899412789618	0.204924722390699	1.74221650292982	4.03620110368305	1.8428452820154	2.63651490469	0.203016103914998	0.0169724643997989	0.164397464695473	0.018524372677868	0.0905722489935593	0.0680403099005237	1.61699353092545	2.05813626972989	1.7243079444397
2008190	22	3.90797975534374	0.251322062556837	0.439875574031863	0.511259689487425	2.61166034505345	0.329984770228435	1.88104733633341	3.52793354554984	1.68072099202921	2.351972198577	0.210167706621684	0.0183470499632663	0.152632089295218	0.0173275975040269	0.0721059989907772	0.198333645310697	0.854860733805027	2.31395874940236	1.45053860969514
2008190	23	3.37372143873542	0.262384843250319	0.41628075660749	0.362211893825597	2.99264781200968	0.288812060769316	1.87971423793717	2.00515520171332	1.60070859143478	2.07610077000431	0.232905650805571	0.0183002007827799	0.108972848150995	0.016040477508361	0.0578417464854835	0.276849909830081	0.511232751718386	2.50287863923868	1.17222491046314
2008191	0	3.22955285574436	0.417481335736595	0.405120090935003	0.259908787168422	1.80394696145917	0.276814857868257	1.9079234964742	1.13403496389266	1.56664535996237	1.56647149234184	0.216164175451108	0.0193265431374763	0.0785033365617876	0.0147260891631271	0.0502764941704911	0.33519364112468	0.422024613685324	2.51213732944334	1.02951377660678
2008191	1	2.86723142353563	0.390384343975138	0.398009650239831	0.219137950664153	0.919506512408472	0.335047307760429	2.18315418843614	1.01030610085546	1.4934927622478	1.50557153924186	0.192036528758023	0.0239189106047141	0.0537857204406093	0.0136051350083405	0.0864539301880832	0.184219692942925	0.364231958702423	2.3041372940275	1.0140099542685
2008191	2	2.08425018748864	0.432259674066448	0.386853550216373	0.190467471894257	0.79849470310186	0.332882260347483	1.61434733709801	1.09558880149076	1.40879900463171	1.57718631496179	0.175613142458935	0.0356194865481334	0.0396199246694292	0.0127334499826328	0.150085031470901	0.175811700165668	0.363104864138181	2.0525393263567	1.24194656436337
2008191	3	1.67978845540972	0.598819445227207	0.384885441363644	0.290043239498143	0.837738041857745	0.3161887499125	0.972491834233297	1.35648761243481	1.40255255096847	1.56706960040231	0.178781547626357	0.0461423593180808	0.0337838894941369	0.0122610784420048	0.204248415860879	0.372074363527253	0.612346299984582	1.81182210047351	1.53437863844504
2008191	4	2.83412684292426	0.616851869291367	0.375969658500923	0.339812635385591	0.827238211873981	0.420974012374444	0.841817753036115	1.53694264550728	1.45826408646909	1.52678436196228	0.185806209663234	0.0467760699405015	0.030667825688436	0.0121316911986471	0.233516115749442	0.342896089123738	1.35553052595291	1.73089723016286	1.70052120027323
2008191	5	3.99310231249895	0.618196733804245	0.374246094292075	0.357593725919869	0.748060423296779	0.492551620803694	0.817512614423335	1.73563763438178	1.55830883692893	1.54958639850089	0.190915714180315	0.0459980721369858	0.0298048264442779	0.0122917212235358	0.26570330260462	0.128524186685723	2.53511648344819	1.76531948911003	1.91341721565465
2008191	6	4.12048636731356	0.626172875709727	0.365915971497797	0.469806664838203	0.833760427513794	0.542735103403371	1.57854753091295	2.27946550522684	1.63913924328687	1.85014154364908	0.189451246150393	0.0475086382475619	0.0329812154606448	0.0118135528413809	0.280486027857931	0.172533745231396	2.51015117237108	1.84869966484504	1.89780195863897
2008191	7	3.32150342193777	0.661530399088885	0.558247564937949	0.537613400643794	1.17476172233675	0.552745907996842	1.8546897058109	3.18649234967595	1.67173827813736	1.79804100954368	0.17739837772029	0.0489769097028248	0.0376296763378764	0.00890389791817843	0.268190324711374	0.312869731904455	1.89956840949081	1.96424118506789	1.76565968304739
2008191	8	2.36563986832239	0.715406011440543	0.558928387731694	0.479102682510502	1.69703537053677	0.570421239116953	1.47569072772063	3.44609994130812	1.67078792326359	1.6877147968121	0.159054110337679	0.0489837463514042	0.0454206248483983	0.00501908214072411	0.222366917094677	0.306309511973563	1.03600490529192	2.01469436105076	1.5397097766335
2008191	9	1.90972075939935	0.782750245462478	0.480345089974609	0.450055852699722	2.33970841205293	0.647946358286365	1.22366290601899	3.06014076049754	1.65037372185963	1.58491281024247	0.150369217374362	0.0562043411237209	0.060044176352315	0.00427616897963837	0.0523886159253242	0.330691271605387	0.852961894774002	1.89822326275877	1.32280758283176
2008191	10	1.73906536207917	0.845125255090233	0.402088131160141	0.515829143832494	2.43660785316788	0.611028674683683	1.04752005608532	2.42266464799902	1.59341586429548	1.46250990213495	0.146733764636092	0.0758898559975174	0.0709477887463809	0.00417964325719217	0.037768974975955	0.319161619864747	0.689547765709037	1.79796889592645	1.14597536759396
2008191	11	1.87650771912878	0.713337663385232	0.309229894891332	0.474349096171696	2.11794851044322	0.534773743527539	0.919896408194848	0.860031925909309	1.53651703737646	1.35928784154209	0.144136738863253	0.0949476845005291	0.0705415653141376	0.00413674792335593	0.138732668619918	0.314507708467454	0.634545868011034	1.68541923788468	0.84246854741834
2008191	12	1.96929281476807	0.716600396357801	0.242206639519651	0.366646180653348	1.8487310415305	0.488153836023289	0.836566468446596	0.547426064154205	1.45993106101038	1.30807279146197	0.133657562156964	0.103197427863382	0.0620514840177115	0.00426832069746622	0.256377370691822	0.298291147496434	0.62881608496361	1.59277581206161	0.379883402983965
2008191	13	1.91271947351131	0.950333375323192	0.199227356643172	0.0810509271819993	1.21218318808082	0.46149233841947	0.760490377204415	0.723972371458906	1.38373340455897	1.29759203435824	0.129752753818713	0.11953132790559	0.0591417547278325	0.00393639145003536	0.251903800484897	0.281942612712819	0.602209644765895	1.50537239604576	0.1199855172773
2008191	14	1.80948419431764	1.04643513326002	0.171339359765202	0.0383194316022208	0.471301683086877	0.39086930307475	0.688167208885915	0.825888950172281	1.297259472245	1.3263583073631	0.138110271468574	0.151025627758085	0.0588716415538073	0.00361651344468392	0.229516812609803	0.28869013538435	0.642292224394283	1.42344320007551	0.0482442122089397
2008191	15	1.55468555647414	0.87379368847968	0.151731054833993	0.228861388453709	0.378367496808107	0.351531652286399	0.630411812705467	0.879930831744925	1.24383723953566	1.34661735543632	0.145942220746384	0.169934786095234	0.0613998426824145	0.00343248444086608	0.219877755009104	0.284789037839042	0.872708144317647	1.35092704042361	0.0171949799703385
2008191	16	1.28688936326122	0.862489561988964	0.136216103014058	0.718324881117852	0.436032301008099	0.334811577858831	0.591998262690359	0.932521432278856	1.21215376736713	1.35643034106516	0.147135608773447	0.185999710666572	0.0732671706050323	0.00329840028092405	0.214988911311983	0.27347767046101	1.08359023216595	1.29507508117003	0.00167028513463187
2008191	17	1.10898290958995	0.92773054274275	0.126668110514885	0.836009396502556	0.715853056331581	0.314969964675009	0.551722460851052	0.996822564593776	1.21690106512971	1.37548848217946	0.141949285359348	0.168553489720127	0.0606278143642414	0.00337975332796484	0.208471671662473	0.248557067601657	1.1921882486994	1.23046825740626	0.00128425272567334
2008191	18	1.02889591901512	0.833448877704703	0.110901273395413	0.73321355243667	0.887323736963908	0.276090380768357	0.509921247722268	1.07822234216451	1.2531578427408	1.39285883791581	0.148747271858005	0.146064381719705	0.0350994989406296	0.00385642893868561	0.172731603717052	0.227202168401951	1.26330137511942	1.14411779649956	0.0326804817426583
2008191	19	1.00821742161787	0.725771993927449	0.101838153688337	0.614605204820297	0.890598407217895	0.211952771591502	0.546362971211638	1.09393746229603	1.29036971103253	1.35490822704488	0.165809148767625	0.115009327992208	0.0350853699098028	0.00497167895324875	0.142987336821063	0.212728192501066	1.27783499132483	1.05006033528373	0.184435125912053
2008191	20	1.10485548967492	0.630662490915667	0.0998429637256611	0.513236284987932	0.783583840492154	0.15437879310972	0.594879677875972	1.0250009385925	1.24534280926936	1.46092834660009	0.173817657842954	0.068948918924133	0.0493763362616899	0.00674876572628894	0.130541123068092	0.193387099479026	1.24309965204053	0.97183665412148	0.114488304357529
2008191	21	1.22545672666022	0.474498884915833	0.0992801199441711	0.388413571615719	0.722606995170189	0.0443998552913533	0.729644329591564	0.961002880297441	1.23627042684971	1.52101088286658	0.180036310625846	0.0336641355485081	0.0576982345907111	0.0104407149661058	0.128826825603735	0.185971029089775	1.19355814621843	0.946702258116002	0.0264708223188457
2008191	22	1.26456556251463	0.289394355347928	0.0988911077236694	0.33744338910481	0.787953248853908	0.0323968964213891	0.823007912525024	0.947344047382091	1.21595362085854	1.49109082461371	0.219281634532593	0.0180262408899977	0.0674726874853771	0.0162853631054742	0.161003499744328	0.15770143169194	1.14713677975188	0.934716761326263	0.576099922452027
2008191	23	1.27279187012426	0.114521644208299	0.0984636042972339	0.307244174417796	0.804672771421211	0.0318678886148714	0.859852741590918	0.988479773840123	1.06349733662808	1.488357423324	0.25787030212641	0.0165149896019769	0.0818242320093142	0.0214802320891416	0.210925758947492	0.076782152041266	1.06721552144982	0.901447215177417	1.72255015048059
2008192	0	1.20301423104876	0.0206794145329312	0.0990411134957645	0.288528271721566	0.757237459200254	0.0338609776454268	0.855732454078911	1.00615299498523	0.768578390558876	1.52478588273707	0.247614678015493	0.022564074411523	0.0989637343784718	0.0254614713568268	0.206796929684718	0.043432860487708	0.960422880124804	0.837135475853441	0.609886483965496
2008192	1	1.11055843882012	0.00546563377347677	0.100340491944483	0.285312434392026	0.76936349803167	0.0401961549314954	0.915717973044991	1.09813945849452	0.567443508646367	1.49022468355272	0.211745787452481	0.0431307761608719	0.115573537823549	0.0287883707010312	0.165040284874278	0.0392273680164712	0.782936357440184	0.786702672728703	0.249497911512693
2008192	2	1.23619268743048	0.00203548240296968	0.10066859742614	0.271857127113748	0.762493344241208	0.0437791204135019	0.972955176415352	1.16368812697127	0.513752990701704	1.41726835665785	0.186816258985439	0.0683841767433818	0.136732672326781	0.0322123448882688	0.0652555876556681	0.040639865941809	0.566212830335331	0.762737642069448	0.210405580475433
2008192	3	1.53340413423425	0.00249958881697241	0.099996278077076	0.231370824533781	0.715605647821741	0.0368585610452654	1.02119132759275	1.22685949717591	0.51571752953383	1.3457844974641	0.178144019339588	0.075530547278849	0.155637906430823	0.0363820240893475	0.0247330887282638	0.0501518079249175	0.419353645728871	0.709309376820754	0.220001790413796
2008192	4	1.17488803563227	0.00977256257911536	0.0998553687241956	0.20029314232555	0.645187360600254	0.0647006499866223	1.11485111768282	1.30067495559294	0.580248080026814	1.22286321941012	0.165713585249441	0.0765458810745758	0.166261936271063	0.0407349428278219	0.0340460266207166	0.0587598554066223	0.361276678899314	0.55365277627333	0.256066950125514
2008192	5	0.0938173551875155	0.0138119905652484	0.106730484910921	0.156191979939562	0.619382828009592	0.148496645538478	1.1074828494491	1.34472255666698	0.647779264476357	1.172999728947	0.157251605707941	0.0739514217331177	0.185543690683219	0.0574673328792247	0.0446661088975172	0.0651813180149701	0.371144622566213	0.596682940288509	0.304581961330143
2008192	6	0.187779534370092	0.00442858507875571	0.1135315397831	0.133684642114235	0.677334025320087	0.145268924981191	1.09695611224675	1.19220499763916	0.775975957650261	1.14226335641646	0.160293109742792	0.0716206806031463	0.297961998161712	0.121653435347381	0.080744440756612	0.0676057381936434	0.419482501853129	0.681176012985718	0.504784410325933
2008192	7	0.23788777913922	0.00227115090336385	0.141688928852825	0.203150818532824	0.861049849731619	0.141729153490515	0.968488133957404	0.522282781049828	0.992968012453016	1.09644554522462	0.153948032094023	0.0659783486730911	0.470160193873235	0.0870674488898187	0.0884544534660885	0.035307891090261	0.482320779386085	0.773241329751852	0.19736398149594
2008192	8	0.943234750200743	0.0438765572044283	0.163882675189556	0.0783143462521	0.948919188841177	0.131344131752298	0.975797506323608	0.109062172145814	1.25533879944455	1.16320221591607	0.134156101885421	0.0647281857933024	0.54010886458393	0.0791521270862304	0.0768462576125774	0.00743158828674023	0.524370866440482	0.878404021966536	0.0750203683869019
2008192	9	1.58185156354083	0.104222241614705	0.1326099425867	0.0319714679325659	0.65549766598696	0.113957320907379	0.895517865680644	0.0750142844461763	1.35828436161008	0.972704134839248	0.112862913524722	0.0726587854988686	0.495021667162875	0.0778095523726483	0.0662983814424046	0.00272127544761697	0.53860907678301	0.984223134256396	0.0136795919977506
2008192	10	1.51621264867004	0.141156282896125	0.113342465608296	0.0235384275602837	0.179505721169659	0.116933002383959	0.802686934262623	0.164307225755927	1.34067385059643	0.620832246777664	0.104933128605187	0.0955133962043942	0.408903068505835	0.0810216644035217	0.057743457310438	0.00258069326815182	0.555158526539147	1.10776492231325	0.0323375139364131
2008192	11	1.62013429046519	0.177253990183121	0.0942958081143365	0.0160509062893793	0.0316675762325001	0.127581074462776	0.538531403713957	0.320874304028743	1.21329031687972	0.179785816755255	0.179309130719068	0.135835849685376	0.399363286580971	0.0962649783421668	0.0572181552125909	0.00726709246657229	0.602782824026483	1.26683045531943	0.108166875383298
2008192	12	1.75503760590856	0.178755781215053	0.0787555436488798	0.0191499678977775	0.0262694678292117	0.160035657311222	0.203165807538177	0.300274884210166	1.01879542000178	0.111917740605875	0.31296317077008	0.15625121802425	0.398271807019548	0.12058506874612	0.0538045848469808	0.0288895200226055	0.57893925834811	1.37925660201148	0.16234770122502
2008192	13	1.77427825657971	0.312067960071602	0.0661567549504676	0.0317247736133278	0.0230068495802952	0.22444715203297	0.187184104480269	0.629563342855408	0.912526393309126	0.167777268592991	0.404713360985923	0.187860563661021	0.408860074451506	0.123212577911355	0.0490280715891181	0.0543866540082164	0.528965197115904	1.33960254128757	0.169006060688037
2008192	14	1.7326614022106	0.402272145962386	0.0595001698321666	0.0635352159427244	0.0238127774568201	0.140680743320335	0.332234525717549	0.689899805765521	0.681149134923828	0.478191023742659	0.425607888353452	0.214555391105165	0.4629031748496	0.108675136193295	0.0484070429704027	0.073015741065517	0.48194021592961	1.13299397675141	0.323711272936513
2008192	15	1.45965341893716	0.394222761832751	0.0549898163433243	0.119267831185538	0.0836098833544152	0.120071701941553	0.526425434451179	0.363192156342023	0.271954308497563	0.65097462186457	0.394831384512672	0.208438263210565	0.563077659457503	0.121011007482156	0.0720856539358942	0.101834086459968	0.449460829013976	0.998036600714988	0.522004023600574
2008192	16	1.21313492480048	0.202055690300602	0.0520309744112999	0.128090339735266	0.19853518949792	0.114273592667809	0.66463735940468	0.260669445996045	0.274698992763721	0.664004675165884	0.357467323585726	0.197574731562353	0.689406643484395	0.161710046982506	0.0879262817865745	0.192028541007716	0.417797592780233	0.850735739201582	0.533338145664423
2008192	17	1.19001972067544	0.142351981669918	0.0501944220269917	0.178353674174591	0.155239045979894	0.109439794530291	0.615193055645043	0.470545534866278	0.49974464865375	0.835865156290533	0.324912212767005	0.195360226612875	0.803608337601054	0.196839437613907	0.0868628689186332	0.153890467447702	0.386728122684254	0.554263633693055	0.455285654720942
2008192	18	1.33382710787212	0.0302133741730384	0.0490684340749357	0.225193298024934	0.0889792664575816	0.107271036932517	0.495902552991183	1.04215754395788	0.802648587829585	0.869641529349906	0.262029270998949	0.193623804660861	0.857949557398952	0.179576501307031	0.0743902090796702	0.10725085458183	0.349259817297348	0.411342674827248	0.381590989307643
2008192	19	1.73043222390413	0.0518697704929478	0.0468311748947423	0.234040412547773	0.101196828957986	0.105075319904758	0.514274828151191	1.24189620804946	1.00750776906285	1.04871261829691	0.178363353018982	0.185803210422078	0.880462324247841	0.162808919516542	0.0549088743198678	0.0840049237409425	0.296244725973771	0.465197098679942	0.362574059315169
2008192	20	2.13871226809986	0.093141105181623	0.0445011393672207	0.199139189039733	0.126995006084714	0.101809047530604	0.738499528895694	1.09796809937807	0.833470567504075	1.50382988072838	0.125948871856514	0.166337691895896	0.860297403312589	0.157991095252228	0.0548650025726927	0.0775191957560936	0.25701322108434	0.628067769917463	0.372761483757293
2008192	21	2.42910566736926	0.0841567517049899	0.0434283797575715	0.061949850498964	0.155119259918168	0.0984335138738842	0.764478521527597	0.873878121791665	0.75156201468367	2.18568934935384	0.114769599748649	0.14724334088428	0.823052488212455	0.249111374952757	0.0575742767968417	0.0746716015610342	0.225653982348434	0.816300407727657	0.461870114377483
2008192	22	2.55389177125577	0.023147947879769	0.042621352056525	0.031525477395368	0.356033758721069	0.0962498286952233	1.08235050999291	0.716066099328388	0.850787525417733	2.29433156317229	0.125711838121219	0.113408676434768	0.729795725457403	0.410578115911679	0.0573775757601834	0.081663389883908	0.145511651666224	0.632354410911468	0.659061361526645
2008192	23	2.58833079802388	0.0076164137153054	0.0418225188346667	0.049458704721396	0.497435621880697	0.0954602580087334	1.49280399159719	0.666937617740241	0.957922438104653	2.19633866540233	0.135632121151654	0.0957549498390799	0.814122505220712	0.532948905115973	0.0677645756824191	0.0952985095593151	0.0733489554903095	0.501366761779892	1.0551106292575
2008193	0	2.54232301099754	0.0235454534830748	0.0397888791532933	0.0780568964593204	0.462418257022196	0.0944220245947451	1.70380075156007	0.717567922293659	0.928042080619816	2.08382622503277	0.145544889643791	0.0921450178197158	1.43550128379614	0.447690775853573	0.0656919996570853	0.126999263303163	0.0326553093615158	0.686268792187042	1.18444929044181
2008193	1	2.43554442599043	0.056834469384109	0.037745366657424	0.0722378326220932	0.350478070432404	0.0919053050453129	1.75500468885983	0.744984306156929	1.1185719795553	1.99354264903581	0.156057269179565	0.109541272425679	1.38853274141868	0.476321741814259	0.0637548990294525	0.117154940982827	0.0623385201950648	1.05806688239137	1.03875625962189
2008193	2	2.3866171186015	0.0927216193563642	0.0353877113152932	0.0640336580046116	0.157072312708417	0.0917475858605816	1.76569312893254	0.691005958234667	1.61698310257213	1.99034550542513	0.182248915556134	0.120749097425554	1.21004579044071	0.458466412364182	0.0622621944942981	0.108335615000032	0.137284822950988	1.16028472123183	0.718113491214577
2008193	3	2.34467654288728	0.0200584243276582	0.0333119489764192	0.085620730359233	0.0322322925082451	0.092725202601173	1.72515973746753	0.585504921992436	1.78250707612349	1.98760804109708	0.22582218316226	0.124082956899432	1.523776981128	0.355119832123581	0.0598736019581569	0.103513407876393	0.127843043390071	1.79326770624559	0.508397704425201
2008193	4	2.5804943980242	0.00477753278323336	0.0315790128123685	0.104450441855646	0.0310290088405072	0.092785893723953	1.61546157979523	0.491093266541835	1.82542492831127	2.09992541975717	0.267312804402691	0.1356134948383	1.83914569144883	0.239262969336259	0.0682475265857902	0.10028724946569	0.120562425209877	2.09791689766503	0.297956031954235
2008193	5	3.22736260516048	0.0365501084542841	0.0299775638846137	0.117232074062367	0.0661519595505696	0.0850443696181808	1.39126453045863	0.401363354607233	1.93493456664007	2.18007786166481	0.305547584618864	0.144509779192945	1.55640497095627	0.198926254574146	0.068297011119482	0.0955075234667721	0.121823620098949	2.08054871114384	0.241752987149707
2008193	6	3.58542485779772	0.0574921494578932	0.0283703281578476	0.134373571997767	0.0184723452183217	0.0776878463921945	1.28708817379971	0.326910432809154	1.97455571961325	2.18791058391237	0.396001726768359	0.141748424288528	1.20345429291077	0.129048911998613	0.0662494064266662	0.0784389552647337	0.105095223527726	1.98237370483305	0.38443242391915
2008193	7	3.60612509114083	0.0939567129761544	0.0274211257210423	0.125403178186577	0.0130922405100241	0.0724937766603159	1.27551238519749	0.28694994122761	1.95708374758075	1.90824743934956	0.535571946471073	0.133338284632258	0.963553624906676	0.00543087376375672	0.0599571094479685	0.073246544962486	0.0852593540902246	1.97229051994401	0.693239709040423
2008193	8	3.69983986767011	0.13842606239275	0.0279438585939328	0.107977686208147	0.054407647870499	0.0675547904554671	1.12578255785593	0.318377969324825	1.91941036683917	1.35996425998163	0.597340696323039	0.139695347959327	0.814986119173694	0.00689672501843476	0.0778479312881833	0.0717597894509796	0.0529197066276547	1.96074982719578	0.836781817705005
2008193	9	4.35753399049434	0.144146951205195	0.033705355384917	0.0908609847895696	0.143206090625571	0.064298575852711	1.002085332178	0.499629281600743	1.79775225734588	1.06461536705918	0.410317849012526	0.172768886641582	0.677670837725097	0.0905640096717239	0.0981668596338334	0.0666583395689922	0.0418801628263607	1.9075198639146	0.843706711384915
2008193	10	4.13045203689545	0.139321551188556	0.0351162426448856	0.0914530755354379	0.18357896192462	0.0643337376387124	0.785775362384054	0.869731698551394	1.53707447688401	1.49546228079452	0.729856326547775	0.196922618933517	0.723295967968643	0.242037225285115	0.0940250436360333	0.0642476128907164	0.0591685523629139	1.83976176602584	0.820561869943113
2008193	11	3.85528674700891	0.130949017392024	0.0358600597021316	0.0846574197590802	0.204516719567472	0.0645415109828357	0.504614208075171	1.14017529067125	1.13802914554424	2.94660263841792	1.59360677533274	0.176422886735787	0.732090203485751	0.298574735100645	0.0787092975019495	0.0590064855001404	0.0781075381467813	1.72297501262119	0.801453571759813
2008193	12	3.44285787944044	0.120115417118023	0.0359567872811006	0.0746961801091017	0.256538400471987	0.0572528203736351	1.04842230893974	1.25613164517998	0.860522075947379	2.85613099251168	1.65448721079752	0.144350245795006	0.834973511184045	0.325301296867815	0.0706188599773928	0.0550620057233619	0.0955274851671006	1.45971874433804	0.668534153479506
2008193	13	3.77280425637083	0.103961061110479	0.0340028082335146	0.0674308188845919	0.326129697425345	0.0477365542315162	1.77071610352222	1.15492584194375	0.925886383932745	2.80559737666055	0.759130769398981	0.129506554934379	0.858222743556952	0.264620315261002	0.0672237643188811	0.0522354038679511	0.107597447780368	1.15525556577408	0.530580235853811
2008193	14	4.61603696696021	0.0684782808322351	0.0296253771522454	0.0615998032735437	0.364340088341267	0.0424078570558302	1.57106568356917	1.00913743512866	0.871133049330598	2.89182268271017	0.943377927034306	0.142330026691746	0.789384539697456	0.216619998998613	0.0642330054292796	0.0488917221659248	0.115607963991697	1.02199487681064	0.454013011222962
2008193	15	4.92638529447577	0.0598332931564741	0.0266553200565453	0.0558082578239261	0.321381754043987	0.039587056999863	1.24438561076555	0.872870928957583	0.763215392162509	3.5865290887799	1.03455198505965	0.150970323956609	0.470410560993518	0.167961503381373	0.0654972272509412	0.045574560865682	0.111207946114124	0.86337205510344	0.434417141369238
2008193	16	4.34985180327566	0.0751204719096624	0.0255671761832712	0.0471068895981438	0.214269514182635	0.0371880426193109	1.59909183179178	0.60245679089759	0.941920428822641	3.85105861980313	0.968544308283876	0.152725269134711	0.51931213995644	0.143272654602341	0.0680659621258616	0.0428269002753143	0.0942049472054383	0.632380195551749	0.409107933188244
2008193	17	4.11330877337992	0.0730047166683897	0.0252957080990162	0.0396888747150285	0.134820340580693	0.0351559157483365	2.16456639345146	0.446404180336483	1.29605981658904	4.08397038820151	0.897628046841618	0.153826299053706	1.15840783044509	0.161374296966997	0.0698069692845772	0.040358479545699	0.0851589126585098	1.09227575068121	0.378609905914725
2008193	18	3.57964857984504	0.0707101303790656	0.0239670028551276	0.0394199296114125	0.101262628604797	0.0328238781912239	2.27511906823496	0.52386447945753	1.28057399345798	3.72400099725858	0.817681392148587	0.158364823569507	1.66523821910429	0.205053661046653	0.0613749924788276	0.0377058617300495	0.0795505256277675	1.52045918784113	0.387957425323404
2008193	19	2.90005771423257	0.0667822719996147	0.0232464189252256	0.0491127982756993	0.0938241033912127	0.0306979730573189	2.24829385592949	0.710325205503169	1.13638673074579	3.65276916188064	0.674125886122828	0.16597877623495	1.95499952309249	0.211541193670664	0.0565365857941953	0.0363192923348527	0.077041192856658	1.32804426327341	0.431915219893059
2008193	20	3.05289051606319	0.0617534988355743	0.0223768915214192	0.0541281951970419	0.094772942230658	0.028091422201584	2.07187570494303	0.727199566739685	1.10553827408947	4.49539715730895	0.622095890504432	0.178669216772506	2.49651292932815	0.189182308124064	0.0559216531445244	0.0358096096909579	0.0815562096431475	1.13680374897269	0.546628658535538
2008193	21	2.41145574049456	0.0550965462716378	0.00686007371912154	0.0485790931807127	0.131120379552322	0.0182437184317762	2.13984567198138	0.55376863449518	1.26289939881784	4.79456691736956	0.548303455302011	0.192123674198292	2.16872392510646	0.154825585232688	0.0539757166361281	0.0377439670556358	0.0896960817922982	1.13810273662709	0.361550121260266
2008193	22	2.22251664511033	0.0426574533892513	0.00155490082340385	0.0379218761387698	0.174827829860678	0.016924023563603	2.35742633375665	0.32118760490731	1.64880675129241	4.50705870136057	0.451150528261998	0.211293522988514	1.77479674208219	0.16056971728571	0.0574000709202855	0.039903410754866	0.0962596418711924	1.49010894265934	0.290182672799505
2008193	23	2.91843344333361	0.0506922027128056	0.00122522408387887	0.0263413795415218	0.156955564883071	0.0235847677097178	1.73305671633824	0.281222871102972	1.82068239384056	4.53984099376878	0.321714425545047	0.243296242780265	1.6067237218744	0.220262974501336	0.0601004130920423	0.0416011932013944	0.0961943062257283	2.02328759953829	0.303428757723611
2008194	0	3.70844293581432	0.0758739162892468	0.00454311782631414	0.0230466668842742	0.118758284713216	0.0181999878876808	1.32048121096002	0.344525106300406	1.77648931985365	4.56691895365037	0.208651496631971	0.302795543781506	1.81003667486566	0.590012078294226	0.0643518467708799	0.0393033872253254	0.0916119497846771	2.17836920694791	0.409004108915514
2008194	1	3.90063462037907	0.102048126409026	0.00728965632801411	0.0255779300733952	0.100969705102966	0.0306756455146757	1.082231596929	0.336267455117942	1.51425650782102	4.34160515530275	0.189987355855685	0.0841764345864006	1.72956752401509	1.40373386717638	0.0690737796964151	0.0369107524755688	0.0894688488004189	2.08450880536994	0.474356148421926
2008194	2	4.06396905289154	0.110236910646395	0.0146154651741587	0.0310253064891727	0.092212330742986	0.0467280441757753	0.942109523217802	0.264119261084063	1.19463740401623	4.50507496991524	0.201183865728584	0.0208142323557921	1.18050835530021	1.55287292741062	0.0593851606552532	0.0360271038720285	0.0756214877717191	2.0718296030919	0.891357921996346
2008194	3	4.37990877488664	0.200547032109451	0.0315094348388868	0.041170497758151	0.0785598714864513	0.0383165797330967	1.54128117735559	0.221533069205754	0.96224042274665	4.23179885541058	0.221534071204485	0.00125677792478856	0.707881167494258	1.77641939843623	0.0510337169702735	0.035709782801129	0.0581180602622988	1.73239887269151	1.47959378210135
2008194	4	3.6672089026673	0.283528466624854	0.0632690000407271	0.0580271964070338	0.0174349610081148	0.0276045110706743	1.84376847355261	0.38289182353093	0.683935980152378	4.1293410216702	0.234367292881631	0.00207640127115441	0.604191751052114	1.85041858894478	0.0480234522305035	0.0348295902388762	0.0354025959833102	1.16292155462503	1.26235025795397
2008194	5	2.53061485205732	0.183404490958629	0.131842301269938	0.0688484155029148	0.0207239299057087	0.0239338133564671	1.16744651031222	1.11839651044854	0.498270720920368	3.91080101901747	0.230802226279467	0.00780719434991962	0.513764201729969	1.74834695429178	0.046122117547828	0.0334924990334699	0.0295558023267476	0.77672624450766	0.794230121036114
2008194	6	1.8837485286254	0.271253574626698	0.232544453235649	0.0706437962930972	0.0477885667899347	0.0223947562407862	1.15222149327333	1.50341997847871	0.600427268641431	3.44599113792289	0.21349049658493	0.055163807778988	0.392722665072843	1.46613834256119	0.0438328150781718	0.0315210883256072	0.0284303876097265	0.590313897122159	0.483964457078761
2008194	7	2.390469247416	0.247725088531834	0.399481460476405	0.0712197258728269	0.299101695524937	0.0214148825789548	1.94125868252769	1.40736716320748	1.06355264651447	2.58712380495768	0.191069337952256	0.140484611707824	0.223164997258986	1.22265122557563	0.0419140764086145	0.028294342539861	0.0313223210689473	0.560395164863939	0.976780445188676
2008194	8	3.07185347092939	0.256725129597018	0.473133845298527	0.0730416630039551	0.824819325928509	0.0249313047093793	1.90747378557955	0.803233131827198	1.55778168640553	1.9741388746155	0.179167179330183	0.154493099656642	0.145001579765128	1.04919997680705	0.0409443571628258	0.027747867594238	0.035122914207119	0.743380192514474	3.373748558761
2008194	9	4.1022311290687	0.406152623749128	0.474936715526455	0.0627401216644283	0.806715568614655	0.0299681234227573	1.54084408721153	0.511925336343989	1.85782855419333	1.03187228225458	0.182985826692481	0.114147783614173	0.200131808696243	0.810658104982481	0.038791368631181	0.0266387029692068	0.0401816716019008	1.44648562613691	3.88375411626245
2008194	10	4.84001369162076	0.373509245272425	0.408172592476861	0.0500615682359901	0.629148748390452	0.0296485765558677	1.06260107997829	0.424784414688415	1.67797757626316	0.550717336204458	0.199849368108027	0.0571053156504639	0.733653224143776	0.57162680424122	0.0376521671815994	0.0227236723644555	0.0480916306025294	2.12888198593875	3.59400222211205
2008194	11	5.39389914302737	0.392662304343781	0.344327654558403	0.0421974225889424	0.50541944152298	0.0412939714814818	0.393673048053845	0.439920253254483	1.60879217071894	0.973574293611052	0.238462411131787	0.0691004285685166	1.41141150877388	0.392835925062996	0.0368829635391756	0.0170743798431675	0.0557994769489175	2.35343874810151	3.19436216466176
2008194	12	5.78630092659793	0.500984215568463	0.299080807657826	0.047149043778306	0.398177748300876	0.0814422607964011	0.345968577940093	0.670423297211128	1.54221095508518	1.68574332129027	0.300770119676996	0.12243349994989	1.73635735756508	0.174335065011076	0.0360602093724161	0.00991435458954111	0.0639100276129214	2.01416155478069	2.70609975269154
2008194	13	7.34086092209708	0.524668624859166	0.263507447398447	0.132597320181729	0.268416947644599	0.130301214110515	0.525756674852684	0.699583403276362	1.36184426643329	1.72710045955192	0.382899911041938	0.16972152732231	1.93105114321416	0.0731908387603646	0.0350990341405601	0.00440584672089558	0.0689417404132112	1.79276163207123	1.67980590365608
2008194	14	7.37169902355344	0.477955559931451	0.240537589420588	0.225792979569021	0.244596490920382	0.161882213920615	0.997511006848597	0.689852502075819	0.681520675288401	2.98032592195764	0.454116302309369	0.121230783808559	1.59641843123424	0.0560637589382895	0.0341834158573586	0.00308341430867514	0.0696412539066005	1.72646997336777	0.820651176024225
2008194	15	7.79443862858124	0.306997069468266	0.219255461535442	0.251077856430502	0.452756913155368	0.186477369718447	2.30801647272109	1.80212791372043	0.994539704334735	4.61754556261044	0.467066321781998	0.105286254863531	1.35327061075696	0.0798620559749021	0.0336774115331645	0.00257020191708062	0.0675252505390348	1.20620000451915	0.624248322752252
2008194	16	8.08641070267667	0.124580643434625	0.19295023634385	0.273380986302423	0.491377861788716	0.20647730677693	3.09968524376689	3.25210513796574	1.35214701195449	5.7217822312701	0.428515998384554	0.148516876689458	1.13601254004771	0.127990950022539	0.0330123283373364	0.00203573941314999	0.061074008156457	0.834965850171482	0.527064901856551
2008194	17	7.50781494628221	0.0540080127190078	0.180435436686243	0.317713652632097	0.358777710333067	0.235542816298237	3.38677725066359	3.66384427332321	2.94157635106486	5.85153605623196	0.349802646937027	0.212742711280541	0.93693294191968	0.151744586926094	0.0322344185745801	0.00172628942130312	0.0451839622465532	1.20596543954653	0.54372546404185
2008194	18	7.01409146786469	0.138280478670069	0.173878240868358	0.304179687177645	0.26143297358715	0.286963940945995	3.4805154187361	3.97520417892113	3.71806093542024	5.83046722697293	0.278532697555743	0.270112090872618	0.663541757470085	0.189948524276933	0.0312758800089658	0.00162069085471231	0.0323440365412941	2.3770271867569	0.752208654200707
2008194	19	6.79241388757764	0.44284601172322	0.17043866977942	0.257254089688531	0.45462657974668	0.301137290199103	3.82774617897657	4.44555663015208	3.63339440441941	6.24097485333963	0.228361286615721	0.306992676234926	0.52465245866644	0.345025023629511	0.0300821940465316	0.00183302908218066	0.0291693583471923	3.47150249306541	0.825748449947682
2008194	20	6.26382640357334	0.633254216560545	0.166461881431002	0.123001436754328	1.032307838963	0.267010266058581	4.07768362272	4.52256999461838	3.39166808106044	6.55895545600028	0.192893150748476	0.332079584094936	0.489840317708953	0.732452651651303	0.0292937070131321	0.00339838951889927	0.0335353433266761	3.539646816465	0.839297565385586
2008194	21	5.36624493111214	0.675141619500946	0.163798852107815	0.0555358618915494	1.37917225865528	0.238517539497325	4.1701619309025	4.24764677526764	3.66939958059882	6.86680341488766	0.166929881481209	0.344063184458535	0.424031170065956	1.09744650702053	0.0286584309901502	0.0121560988534779	0.0337298594795455	3.4096621401598	0.754716781690376
2008194	22	3.76378112414032	0.63588220438005	0.161358289421616	0.0692308151172153	1.63495243841917	0.216483879078898	4.2974648541761	3.67049742130682	4.08551772826502	6.35493304673902	0.146111314448919	0.34530533519261	0.98619305052154	1.45637015751118	0.0280697091820512	0.0388406596732229	0.0279970442196202	3.47448153263897	0.691978419340819
2008194	23	2.93627334082929	0.531629780995844	0.158035588498343	0.10693332080662	1.5974507043171	0.196565075677047	4.29369072618441	2.84038658700297	4.06903940145401	5.22261870151458	0.155140551278312	0.336723938185038	2.30382084091943	1.72301131253719	0.0276864688311381	0.0605207042937733	0.0237262622670767	3.64927471905256	0.617452809876798
2008195	0	2.76508693696418	0.452935447344619	0.155647924199722	0.154687345213955	1.32802928971485	0.163168427793551	3.73949410786976	1.93305501401085	3.89481722206763	4.58445569706447	0.163840889341087	0.312739924929545	3.18794408187192	1.78526005226019	0.0277335131365812	0.0661588951391746	0.0219970645264981	3.65811324048999	0.56416090733808
2008195	1	2.72985204782386	0.376812693625945	0.156784273078642	0.199077829505881	1.03470139434761	0.127224267046287	3.1284719846868	1.21932260524622	3.79886331533942	4.35714968490335	0.175990631223959	0.290631535667179	3.37663322781806	1.01573304003051	0.0282261525281958	0.0293027630709898	0.0226879099566854	3.65197914597261	0.524032516115912
2008195	2	3.0311813567228	0.33861398327189	0.15901439371733	0.250445061493886	0.825609251425761	0.101724295728472	2.28563405803004	0.703825559085059	3.60293321701925	4.14738983029909	0.199481854295211	0.277292514560186	3.37131864900021	0.798028374160583	0.0293180235440903	0.01758908761572	0.0275085193320119	3.74857213465826	0.496112663961775
2008195	3	3.51027103044384	0.313686127343653	0.167430290816895	0.280196321555623	0.717100890741911	0.0911347518279658	1.65790283358612	0.48777979029727	3.37749098870311	3.87352832610985	0.27735938398288	0.259512356149436	3.57354322177377	0.621202267734315	0.0295029188850272	0.0273088356100474	0.0534555325593924	3.76924222501403	0.499737037647358
2008195	4	3.90842399082483	0.300674676726257	0.178004106053288	0.308919929277863	0.625372530925278	0.0917518263815777	1.258253294417	0.428643071784658	3.08151589088814	3.68410307060944	0.45507568774781	0.231576011451054	3.21627622264049	0.312078468305287	0.0298544183728448	0.048114468046545	0.155127350812649	3.28955934843527	0.47975397487122
2008195	5	4.42696751147182	0.30165660867464	0.174097858324961	0.386833674452088	0.548291180447633	0.0858249473483284	1.48324328047659	0.417600740993222	2.28641913703371	3.51256720008106	0.621148201888581	0.196696407400632	2.85842437599273	0.477161185212697	0.0290350125777606	0.0761522097746331	0.258383959993288	2.92654164779241	0.432677870896428
2008195	6	4.99413596973657	0.375528632097039	0.213392237434573	0.481862734193919	0.485955311341676	0.0752449614579269	2.06963019957858	0.417786558344464	2.01957627273703	4.07903836924834	0.643787409589391	0.171725470476363	2.32574755597028	1.05753927627361	0.0282634483986654	0.0882701808873032	0.367331605485515	2.68388096928131	0.385712202839152
2008195	7	5.2588310650832	0.369948158564834	0.202315999802727	0.47789310416209	0.475763310119538	0.109381112550782	2.13415401494716	0.433330805098653	1.66921767498901	4.60754245108881	0.488642766732297	0.171021517754521	1.90723774436078	1.16674584698347	0.0285411843142775	0.0791543904829115	0.55294807968559	2.66643693983281	0.475584567395373
2008195	8	5.44747143276889	0.323216786515111	0.328201670690559	0.433666156890223	0.448189586304685	0.155750926669093	2.29760451222655	0.395689015523389	1.73381647983071	4.91095035812156	0.367092175617511	0.179534429959829	1.45228573832483	1.25826347392172	0.0275663501366604	0.0413841087966533	0.782400518406894	2.4297356974263	0.553171610076684
2008195	9	5.30059892741215	0.279699518312617	0.401883669215779	0.413587649405435	0.425487768850742	0.17348444529894	2.66901312759316	0.336206192131173	2.05480003087577	4.58916820607128	0.40660022383801	0.182263176641904	1.04617049875524	1.36975138870334	0.0287577307533769	0.00523273365400002	0.917318905172608	2.21512807138355	0.532945233098726
2008195	10	5.44036081120906	0.226406064113246	0.393665641073755	0.405540179720316	0.394239975160467	0.180074715977349	2.80946568101808	0.286792331244505	2.25584921839744	3.9250400072912	0.398843330053814	0.181215779240996	0.708759920791509	1.23891722724256	0.0320644254183932	0.000366736867998422	0.957584053931696	2.26642319984452	0.520223345669656
2008195	11	5.40991442308545	0.162314511415345	0.293281189448201	0.391404717277757	0.353656247010063	0.166472486022284	2.85858302772864	0.2630143066099	2.38028225543013	3.18342328355631	0.365267586373708	0.18459836391112	0.416250841146876	1.00431652439453	0.0326271001357088	0.000340932007760954	0.96016951931787	2.26031883259481	0.502548152401637
2008195	12	4.57874265471011	0.109198601704353	0.205113404112027	0.362704291882853	0.313217818927368	0.160343830962452	2.93338138824993	0.260041418353987	2.1926079679628	2.4634921849428	0.368712901486455	0.179767587051192	0.348336088535298	0.886906297838803	0.0298861175961322	0.000982791002185485	0.958583936849927	2.33616356771158	0.461932344812071
2008195	13	3.06783616886017	0.080970725269547	0.157209941297565	0.342493441276141	0.270533650252997	0.162293918542373	2.64474232264142	0.295843044036015	1.98892867834611	1.75565587271055	0.417141619118111	0.196918266308739	0.256656843024365	0.687102551685226	0.0307534186244258	0.00489322536219399	0.963067935119763	2.59994141618288	0.365005333453906
2008195	14	2.1155469020969	0.073000819398531	0.14142682915449	0.285680861911299	0.232839431052565	0.163901530888748	2.22332120342247	0.367377469625443	1.96220871559354	1.13024415845791	0.495728005348073	0.201251349195669	0.252015540319403	0.503369580470105	0.0411277131126495	0.0242770042574751	0.960287088632997	2.63341164229317	0.306889505456147
2008195	15	1.36343465507366	0.0660645037650578	0.131285184002031	0.249740685218389	0.198159600444243	0.147821540808024	1.71774247508942	0.470183032245629	2.04773927124816	0.538573209214919	0.618038190295667	0.195327459620555	0.192501399293716	0.384966954346402	0.0576167639446175	0.0656175164723634	0.953059460716698	2.59441704362101	0.273171134940787
2008195	16	2.43591185833217	0.0597266048442835	0.119619751565143	0.21281124722499	0.170394273551908	0.119789388191395	1.42132196666198	0.640954114707754	2.06836029381271	0.403384198116016	0.698507765243192	0.229702339460636	0.161473556658851	0.282323418908181	0.0626741468823249	0.112753154351846	0.932414967885021	2.64082307728007	0.269525576955657
2008195	17	3.4245181627086	0.058539658153569	0.114194372942076	0.177682434132724	0.152795760217572	0.0978213345642685	0.967145477166929	0.988563672256476	2.09335659966781	0.61910435545932	0.714490774960993	0.281316718965729	0.134827262584604	0.221889633429219	0.0591512236387977	0.144709009149189	0.902712341213341	2.65758088166425	0.296957716513972
2008195	18	3.43918106365329	0.0620010506902389	0.108684776982054	0.154996288748647	0.145051311952781	0.0843097140821518	0.484965986312532	1.45059611762766	2.17790131565961	1.21366578028269	0.734641836086175	0.325582928990867	0.135881025927093	0.177679131406947	0.0511362745292504	0.10001415677576	0.861878119817614	2.38449361126119	0.345362420046167
2008195	19	2.4877627974048	0.0589241419443372	0.106618219509044	0.122797482152646	0.138659718125728	0.0753013733211376	0.297045592973859	1.76490918563617	2.21295819431323	1.50821654881812	0.789679838436621	0.339415813239454	0.161322858201687	0.168011430456425	0.0349907757479117	0.051686234239496	0.82453509632202	2.23139845843186	0.343347265267744
2008195	20	1.63662169922522	0.0605868805644226	0.107564518773839	0.0933284608080617	0.130389897135878	0.0790545515342101	0.355921543870813	1.45722868995974	2.20743027883318	1.59136497385734	0.69747620909336	0.312552414242532	0.229078344710804	0.175931758036592	0.0247378265375581	0.0109710539251113	0.791229209075607	2.1711211581316	0.381730789847259
2008195	21	1.2882612256119	0.0657351452634294	0.0984411405405627	0.0688466338582486	0.123838421305454	0.0953986452256122	0.724849381939773	0.754152771972612	2.03501292800256	1.90440077641739	0.563295646248627	0.266241304573978	0.310588522335564	0.175279131598076	0.0217928957439212	0.00314757383856364	0.757940064111119	2.13088792947937	0.428882074615057
2008195	22	1.17998335582593	0.0682393817303371	0.0803553650714068	0.0595136010511565	0.123396303826243	0.107702231278161	1.19039752956119	0.870467793022783	1.51452655064886	2.34630180088955	0.514136078285456	0.233399607482731	0.359974764151206	0.165778683622399	0.0191577618519584	0.00426418114573074	0.709037549879659	1.92116837153513	0.459220143279341
2008195	23	1.10579105088609	0.0713054809980722	0.0780351471462103	0.0576400886229631	0.165820276282067	0.0841722591780743	1.60333531498487	1.72407733224756	0.900871564866294	2.41460188403304	0.499874604809587	0.235082778573372	0.37039918564386	0.154935537464798	0.0156263859014843	0.00407931077422111	0.638782278330189	1.27086601195647	0.470183291882759
2008196	0	1.03406245003689	0.0803948811540191	0.0812276453518102	0.0552237274070343	0.394286394801321	0.0552160231975312	1.82686566668824	1.86969885722214	0.579675201271506	2.22858186754434	0.491591901636145	0.260525294177045	0.36755489804351	0.152094340744696	0.0146449921809257	0.00332664501272812	0.576104420647351	0.893091108994267	0.472327025715615
2008196	1	0.963871364123738	0.0926364285779026	0.0911895372532218	0.0524127441633435	0.5805171977627	0.0462866568990522	1.86075707701614	1.77822852245316	0.635187017972652	1.95003355072698	0.477331730555061	0.294652887826837	0.364355698958708	0.15576026581327	0.0155241392069084	0.00585758361616692	0.51751186183722	0.875029642773345	0.500583079178708
2008196	2	0.927368174311207	0.104213078427408	0.0980977541932089	0.0499556751303133	0.617920932857317	0.0450801925415823	1.65973393532059	1.55984554336304	1.08169882061021	1.79497286949093	0.456913488977936	0.313781454990856	0.37600867555945	0.18715369337985	0.0160479234381894	0.0088411285427868	0.463701569779189	1.02849012850487	0.579502386860949
2008196	3	0.937195111298575	0.143021952446157	0.0948642003860068	0.0484164337836039	0.977896725861332	0.0451551923812176	1.53474312041108	1.56988945061161	1.75403607808493	1.78681695085106	0.433803897101653	0.325864459392684	0.425048273250202	0.255124072010694	0.0163616880674714	0.0110529637170294	0.415126226564148	1.66727541443998	0.725341858200088
2008196	4	0.9932922299998	0.230475261196817	0.079142117124661	0.0480593288982487	1.46224276157531	0.0455676489905965	1.39018318369913	1.67791066394576	2.07075513735986	1.86321179275633	0.419998062902035	0.212182497098712	0.504933609008141	0.410054969270846	0.0167206150357831	0.0158422065417566	0.365051149383317	2.39036007070481	0.89441302348383
2008196	5	1.07291603813367	0.536275642694211	0.0705684101786801	0.0709916718262586	1.47956419739458	0.0610967819366787	1.6047104639472	1.66577974188437	2.04663452885316	1.89540547075024	0.414348677286313	0.189086038050792	0.83900195449376	0.486762865890585	0.018636012422219	0.0299472450025376	0.319752065327101	2.57297789419219	1.1829467050281
2008196	6	1.0908408715766	0.997404138648711	0.0761032440876434	0.654506617136641	1.45526601590891	0.080185771819627	1.5924584046386	1.52758488105455	1.89388884574391	1.76498546216186	0.41174805012891	0.213168177901038	1.03083856112234	0.315479672815628	0.0216270364472912	0.0463600933173957	0.287321297506522	2.69895649703305	1.12212648219665
2008196	7	1.10876464966473	1.08918842468811	0.0657571960302261	1.09365123705491	1.4360967999929	0.130113119648325	1.55789823220194	1.27461532011086	1.82338662000348	1.60750975446573	0.413215577081679	0.227520666841296	0.871552787771925	0.314408201615909	0.0226087480554439	0.0509805595745004	0.279437130749724	2.81251228300928	0.959935342898251
2008196	8	1.21301171246056	1.07750758503191	0.0582582746023148	1.15046113114365	1.44396856159263	0.376501654189496	1.37797261086025	1.09040775084771	1.71508392036168	1.4957409257072	0.409076350929426	0.246173861967474	0.621562559884922	0.326758677463781	0.0231773679148669	0.0534072372804402	0.27768237780965	2.64701771212008	0.753014406475138
2008196	9	1.35123540988899	0.780340559400175	0.0641610325475537	1.0194176873072	1.41387424926759	0.509104895315984	1.10986110005649	1.01567893665354	1.70071477088322	1.36837962785125	0.391977652325737	0.229249791238207	0.537377843450018	0.269693503348345	0.0207304838171913	0.0438505663882743	0.284991471869405	2.5318164004075	0.584569533771173
2008196	10	1.39465387812401	0.642290411705763	0.0599399779843083	0.838830158515784	1.27467711006653	0.53163601966634	1.00659103341171	0.950358626435411	1.6061999223704	1.17832693249439	0.37077378125624	0.194793587707867	0.622318741081655	0.193983152816895	0.0216179449880213	0.0415733816863885	0.308807991232578	2.04143419793206	0.360779882186783
2008196	11	1.35213922406463	0.578264250173191	0.0666573949104669	0.684993092090868	1.09784824478252	0.486048482911764	0.885414330863801	0.863690617677712	1.4418433768743	1.17756909928213	0.351190546230581	0.175671617984631	0.6465968685851	0.15231190299545	0.0220831772589757	0.0554900610580366	0.376494127156127	1.61191699862364	0.254809190264392
2008196	12	1.28628019798626	0.477768418652651	0.0766480662333092	0.611717515794998	0.949888031002347	0.429026766345906	0.76178095221453	0.811476232787154	1.24047171404353	1.36841906330787	0.336982210604437	0.176344698282428	0.563133192195797	0.143119310371506	0.0177841857166836	0.0624374316369056	0.487674869842168	1.30273622062151	0.224862171643041
2008196	13	1.55714579569372	0.394549021804696	0.072505316384317	0.514409742174075	0.882049388174865	0.394349214352957	0.758895403264833	0.842447569402191	1.03968914668692	1.41298484880051	0.294839326834198	0.163051411693892	0.389712914054396	0.150246268312501	0.0148631006681947	0.0618111641163573	0.581592374509372	0.933995360453703	0.260261414905755
2008196	14	2.18423743900231	0.316714862367071	0.0646966278560873	0.423797148655217	0.832375935371176	0.348498218805859	0.80412049327193	0.921436442501283	0.8361104014423	1.23766154997724	0.24895317046411	0.144555835965762	0.308008097237244	0.161597423526371	0.0130844235975684	0.054253672822937	0.614435879366333	0.771824642190084	0.352933364196254
2008196	15	2.2607867223956	0.24854209282425	0.0612327747585084	0.355702915454042	0.782283075891362	0.287744972657843	0.762686890628116	0.936097115663097	0.687517073966297	2.50815403316882	0.227753778520431	0.123867493782675	0.395761977596557	0.17319116207703	0.00997105129199928	0.0463913539449506	0.688744677260104	0.759044496047488	0.450317671432581
2008196	16	3.25168858224807	0.18755121241168	0.0601225225120648	0.313947072262527	0.783967432495495	0.24281719390529	0.909086449160588	0.908369209566281	0.64848652289167	3.627773481992	0.216399444293263	0.108421329861628	0.86356377240742	0.18599738927696	0.00749331999817958	0.0433138356919467	0.847406009668007	0.839465066742483	0.529958539422432
2008196	17	5.06278894934015	0.151191691902316	0.0535752073195533	0.289714952550893	0.830747116606408	0.217793171170022	2.01002134214752	0.915444638151364	0.720005070584776	3.37615605786037	0.207914926442568	0.098575225441697	1.02793864449085	0.203384111689063	0.00570726927663093	0.048748789657636	0.87876906232553	1.1458192659512	0.511855233517093
2008196	18	6.30391264906481	0.130156912414066	0.0479718892395054	0.250893612029553	0.853992835513101	0.175653182272073	2.56598806870277	1.06938923182037	0.741669221721306	2.48165078890185	0.204168310448528	0.0908779188407299	0.903026276627564	0.200349231010619	0.00479673647080062	0.051990208393706	0.866980503332233	1.42289672636634	0.608560376074388
2008196	19	2.99953063908143	0.113458927418547	0.0449823056754828	0.208234411800076	0.851603031288617	0.131299447891326	2.2537022426163	1.19373628881811	1.20652092879519	2.43258628911144	0.211424795578718	0.0881956028012609	0.797218028420189	0.157523912475484	0.00474391960601567	0.0521976509788807	0.862203221505457	2.00933161905725	0.816161240458521
2008196	20	2.35915194875914	0.0971562133137661	0.0433754308219549	0.156317579545597	0.884275381382394	0.108639239874643	1.8709317423855	1.51673073818866	2.01578011885348	2.40586258731223	0.230685181802741	0.106794178077251	0.680729546638974	0.0951012194187052	0.0110549807382851	0.065594129672236	0.858311486589632	2.68084153825009	0.932888688909868
2008196	21	2.58421605999537	0.100252183648694	0.0425483634768776	0.132249115465593	1.01865466643532	0.0986523690242669	1.87165123435789	2.89438919160224	2.46465464902223	2.84743570357602	0.253166406030616	0.207141181110781	0.624421746043346	0.0718779425553792	0.0331234356161965	0.170998713356465	0.843308474559893	2.64914415371853	0.957287721785937
2008196	22	2.64845963558779	0.125829529444822	0.0419917483098842	0.125997306829963	1.11082983331687	0.0926697687569527	1.92684131142321	3.51915327636113	2.25790588634685	3.0643229854971	0.273226797393622	0.402219563623757	0.663840052979781	0.0516413954750888	0.0695599230568027	0.220816034104322	0.798705724227319	2.83192216760595	0.909227578982702
2008196	23	2.8794994058337	0.191115506124077	0.0416777195710132	0.12453714365306	1.16115841220896	0.0861438098622154	2.44409177537568	2.21032996116333	2.44393180874772	3.11607922981899	0.290255233763025	0.431315242778732	0.696804038553682	0.0521214245973264	0.109619201806494	0.227294163346218	0.734475099519197	4.20804665766586	0.810612148982934
2008197	0	3.25100098433057	0.323503879861993	0.0416205838640761	0.126909159232495	2.16536065784835	0.0787933304048316	2.76801892569066	1.84777134858116	3.71948240307768	2.94289280785862	0.300298192893268	0.269244568576964	0.655123569238132	0.0555299650109047	0.137140596164628	0.231739668023218	0.676059497084679	4.53860722200741	0.741342350348138
2008197	1	2.66616478432795	0.547104177119037	0.0421940171213914	0.169375715608811	2.44774996283807	0.0735647863189591	2.744736171113	1.95001963205713	4.19146327131454	2.6215810664515	0.298753520202475	0.257462298540561	0.560261735944262	0.0620631448748727	0.158127130584804	0.234287476930596	0.647610702652592	4.45717254639386	0.739166470423943
2008197	2	1.63281547097375	0.892632866445141	0.0430448036512218	0.585186387321454	1.76193979437646	0.0713961765258787	2.41467525262983	1.97390672918545	4.16787323559858	2.93447868847391	0.305930350984799	0.227380289940951	0.526851585391952	0.0705851940962112	0.172531613479679	0.220746126765283	0.709423202146535	4.46032858201222	0.811279265213479
2008197	3	1.19635892468533	0.947616739443366	0.043687367865355	0.970041851518463	1.62732266547489	0.0699044685683665	2.37359690595771	1.97360408120984	3.86148686722318	2.82861089139941	0.329438369789734	0.198578668353316	0.596437904040626	0.0790531965950907	0.168156162507083	0.209753595976366	0.962798846416507	4.51221822832619	0.888360873549486
2008197	4	1.09148208906133	0.935463768123933	0.0439556592506356	1.0313642754972	1.78120691312987	0.0808953891135628	2.40924370064908	2.0861416979094	3.69661459576827	1.69303574151917	0.355587448202586	0.164785215802692	0.734294568377596	0.0868974422601786	0.175216935967486	0.199309215325723	1.24162763014962	4.45916825245909	0.896451663945881
2008197	5	1.10996143545604	1.11258438526066	0.0439623865260973	0.944374048078323	1.86168896276724	0.142956851357335	2.093649448652	2.08230307267157	4.03229518629583	1.32052224199504	0.397743209394766	0.122438589828713	0.923882609545265	0.114088057972821	0.21517733589925	0.182982883337991	1.19748386822197	4.43703611296825	0.864261115957655
2008197	6	1.23023508776559	1.31045439586199	0.0439024070201665	1.08381181266198	1.83567450648063	0.265389538518896	1.27595717423138	2.06384270626056	3.76306009109474	1.27909610135854	0.399656236846638	0.093554601125034	0.792346136634785	0.167955968085227	0.372346081938226	0.160430079045368	1.07425384466775	4.44545128450644	0.763924539335786
2008197	7	1.46489740212929	1.1895709840986	0.0505710249228317	1.40644755576728	1.77887843873127	0.603115475917761	1.07559273236257	1.59574383877353	3.14473135519657	1.40562507127635	0.387125967644581	0.0787597314631929	1.04013301611483	0.206537011915666	0.539910923958678	0.123057881512267	1.03294846473361	4.34866660253417	0.395864842625456
2008197	8	1.77329063264661	0.804663601192338	0.0749561931823973	1.48182082328475	1.66122859968209	0.485670031675488	0.909441781915346	1.23044247510003	2.45246599833362	1.74330652515633	0.479493908968232	0.068333461846923	1.21899756499078	0.298211295027506	0.585501284546394	0.113538199310924	1.02376275827627	4.00122436245806	0.202554013405128
2008197	9	2.59041083877681	0.579396599237394	0.0961428175641648	1.33264147618589	1.55715522167483	0.364632763602605	0.759525843171064	1.04764794477655	1.34882406911186	2.05410538353631	0.616271630167077	0.0762987215340768	1.8174670196893	0.240733032877052	0.604716093568306	0.114936700180937	1.21349868200755	2.7198360573436	0.145185791144702
2008197	10	3.09656670584169	0.51418231948089	0.109134302892085	0.959987699372407	1.3342311907224	0.357109101443835	0.783296249786275	0.878888116305677	1.0804236856803	3.09298351882257	0.612649835966473	0.119581000886356	2.27518698732767	0.340231955911873	0.595173007485717	0.120015566628691	1.49386617499555	1.43338022392764	0.136729908876102
2008197	11	3.91411781046988	0.454138770998969	0.114902996679636	0.688609974597893	1.13516804028309	0.479183248057757	0.910089729080282	0.781126086361105	0.879094687344092	3.89436964064532	0.541463395892769	0.187241373752914	2.0561723399623	0.365925155590167	0.578069519448861	0.167547847566184	1.56537415361436	1.16017823992414	0.253686182332133
2008197	12	4.68238316665414	0.410560413381184	0.0939320069551423	0.483641336986636	1.01760324629077	0.534591963967694	1.67357420116558	0.810339972015534	0.747021130499172	3.78533896615597	0.385711109273835	0.212919786913956	1.91245707217042	0.28133744951389	0.526854315743437	0.19309292177228	1.61396442576395	1.1189862396574	0.361605391403576
2008197	13	5.14473019122493	0.335261773325782	0.079927310836745	0.356694793605692	0.859298156220832	0.350647343463483	2.01932990007107	1.12224526071495	0.897735758031925	3.15499859530933	0.277588550847657	0.234913714046941	1.82923685437763	0.203329990910857	0.451521542206055	0.195490593379003	1.58370819640974	1.51598829771155	0.349704637163563
2008197	14	5.21434123398908	0.260607403531072	0.0712502077025606	0.277193977119115	0.733431571922231	0.262513850040704	1.473348911652	1.42345148041949	1.29561246157496	2.91267397417156	0.290766869218097	0.251566578958553	1.29237898625266	0.130459156615814	0.378987478572138	0.171074339559437	1.54313996712082	2.07079267986324	0.265888199149427
2008197	15	3.495828301087	0.201542970748667	0.0661209790755915	0.244679933020762	0.728747745683216	0.235647223726526	0.898133297962118	1.46902730179897	1.38851076386162	2.54579860539902	0.381278473103439	0.261340263868484	0.262737623992114	0.0948982548675016	0.331108449371339	0.170607153367309	1.62468175982657	1.94014588426877	0.197518065210997
2008197	16	2.53634601365671	0.148820822258619	0.0628962632059242	0.229037089296761	1.02089714110913	0.221334241057409	1.06740732080418	1.76358502944949	1.0300354893807	2.45771614869575	0.541650126481551	0.30174465041215	0.0248685616182164	0.058016151309099	0.294368361485843	0.170962908621305	1.65182494226093	1.39849030794131	0.287533532672378
2008197	17	1.35712872236565	0.113323204154578	0.0590165380362238	0.219475200317118	1.08608325172586	0.211015422169825	1.26542252984317	2.004333748887	0.850970469272933	3.27656638476823	1.01223129695768	0.367231158245243	0.0184813667820293	0.0146031711621254	0.259182389381875	0.214470024354387	1.56874185353293	1.37812477001986	0.366041843896324
2008197	18	1.26785264875688	0.11278524457076	0.0550933483704924	0.211978818048806	1.01452388019792	0.20340332716748	1.61498595021119	2.05495194867005	1.08917215273501	3.49232986180155	1.29426349181188	0.405167587489154	0.117151950955754	0.005079886856044	0.224759545971132	0.326114397972392	1.36465563997555	1.74835340576157	0.332932658438095
2008197	19	1.62234275533056	0.114792990111409	0.0488163191932235	0.197871443527003	1.13044690986977	0.193282260920858	1.81522707445501	1.66221226779246	1.4858331688823	4.35909023762677	1.36168604723838	0.400791608619397	0.382133963996711	0.0150815928143607	0.185703389875192	0.409639690807089	1.10464200836066	2.5804158079061	0.32452833764749
2008197	20	1.46775308438567	0.0909540494362238	0.0443872975125317	0.171780109705783	1.31103960304098	0.179469326554691	2.02141226011408	1.1722909772969	1.79269143101199	4.43335096049127	1.32460910927238	0.377574222574517	0.731673824039062	0.0543258208096449	0.179601770217842	0.456176874774602	0.93802922863717	2.90841316492455	0.447577851964601
2008197	21	1.52453815947222	0.0666337082748395	0.0410068447235415	0.147796583503929	1.31329698642819	0.164154956386138	2.43967203477742	1.05935906318014	1.91465130280022	2.91529370439596	1.25023803062669	0.348053521568735	0.814053762404352	0.112543052815202	0.204773924697667	0.456611717595309	0.842434842549003	3.00855049071864	0.752125212672289
2008197	22	1.68183467970912	0.0704799167969422	0.0383929966851344	0.138702620118499	1.25268855774162	0.146296108227285	2.28795408767358	0.938183164006229	2.07003988466827	1.36764540622399	1.14303378846248	0.347972689629789	0.762090299147857	0.186407509445733	0.207024622218532	0.416136305232815	0.866501890798583	3.04003243586742	1.13374460067965
2008197	23	0.781330278711047	0.109029669569383	0.0365116282508016	0.127647914703579	0.805279234577842	0.126338536845518	1.36394393432679	0.872391532876344	2.10139793792526	1.29553330036301	0.709859719204637	0.356481816057594	0.767833764244041	0.177378132550019	0.168606197552438	0.377502603788905	0.965989992661206	2.96007969621748	0.883402872699074
2008198	0	1.01153116608174	0.141624328492867	0.0351155204099861	0.0963004077822948	0.663606307310982	0.115147089881238	0.918277167148271	0.829739516697046	2.0406655922901	1.45709035145746	0.725265706674155	0.364363530805472	0.775960227973077	0.144328972105523	0.221967044968932	0.340149873835452	0.865174883444051	3.00123305431639	0.700284452201001
2008198	1	1.47675426619058	0.14262356426973	0.0340909963378536	0.0853727111572068	0.633160738583739	0.108137169386332	0.96888760098383	0.94618706736771	1.76354252712202	1.34168176048786	1.31719104260419	0.382993448294088	0.883223895490897	0.140809601111822	0.353996400171997	0.29891348853966	0.774702545628835	3.54092210506418	0.716989166882519
2008198	2	1.81391877936612	0.126154097628674	0.0333040638676478	0.129806394155025	0.597248831450066	0.0929847137455044	1.01768521663701	0.988335009692065	1.89735022604701	2.47216957644677	1.51694295864372	0.392559234428558	1.11667855250495	0.158998955443489	0.409404921186945	0.248350878452924	1.00745778424057	3.52474753832483	0.573201746723497
2008198	3	2.87551254271164	0.100462423218062	0.0326242036108582	0.143439163218091	0.549411816022571	0.0707544444317772	1.06648251407547	0.574373101010927	2.05952478061162	5.02865211744618	1.56731892776416	0.395845576286746	0.839415059652814	0.160645909020798	0.413155515547512	0.205601988559313	1.12876402896181	3.52855725774236	0.283960376185967
2008198	4	4.22657642211198	0.0918143461498686	0.0319202553162924	0.128252697272824	0.50649559152461	0.0525094765921367	2.43133236272797	0.332302249783785	1.8691274858893	5.4684133316792	1.51540690950857	0.427165127477359	0.487809102049551	0.170743917180947	0.400089120799523	0.188727968503401	1.07853297633697	3.29244133057746	0.134571003282408
2008198	5	5.27225804501226	0.0900479887468427	0.0312353831211177	0.130113327478756	0.488820192988863	0.0428096912390558	4.11756477502548	0.60481856233449	1.42451070762005	4.66138590482512	1.39794293341922	0.521486421948591	0.515714833602863	0.229733686024105	0.404502564303339	0.179164776605661	0.930220398610361	2.26242495004629	0.0407955519199675
2008198	6	5.07392697285951	0.138238184660692	0.030559029630145	0.122173003995689	0.287298812169378	0.00948499308760712	3.79415727556467	1.55870225320311	1.0390142626743	4.73718262242431	1.3451611293927	0.60246495167076	1.0612119645317	0.105129479747242	0.434522548352912	0.168592592136131	0.585695825359323	1.44138611256284	0.368433965787434
2008198	7	4.71827166174114	0.211980047886318	0.0415872128718297	0.112553707860372	0.0701837787381009	0.00700733245138831	3.19926428700285	1.96051065390982	1.23120054201725	6.20817888058269	1.38403404066389	0.660809905995137	1.47306069828273	0.0747275879808836	0.49865343180037	0.151667805481428	0.627203673178145	0.924536874753069	1.5598502229737
2008198	8	5.23139505011198	0.222947393125114	0.0588597979381136	0.0987180765138081	0.0601853896635037	0.0383556523019259	3.58768252059962	2.46891414812279	2.78089142990243	6.13469733558853	1.27819168654852	0.69524301674878	1.69123204930212	0.0996746538210859	0.521131079907061	0.138368882691571	0.550438027483634	2.39164811258697	1.846065770581
2008198	9	7.23500133727453	0.16818404260316	0.0815249649641185	0.126187013641445	0.940620106658652	0.0527318468713319	4.10670272410938	2.58535838192556	3.17665373567367	3.7461494059935	1.09149652200654	0.701529726418678	2.08170164564367	0.265111293732387	0.466929243934423	0.120681677930174	0.508545218812508	3.68225082523074	1.51220454709631
2008198	10	8.15982425875261	0.071827851133649	0.0704680670306917	0.188614536583623	1.70359055737659	0.0578955202606872	3.76886466673872	2.58354430517497	3.03561858639067	3.96111088104027	1.00916997417846	0.69075237696123	1.97308516691284	0.61800297503224	0.421942973555714	0.0754983350364746	0.483345416764961	3.80880614411667	0.961458832040095
2008198	11	8.55540306981598	0.016399834729107	0.0610974300673157	0.15560117074534	1.61679643095238	0.0583530987356135	2.49512375630035	2.6295404136176	3.3535887656883	3.3000889816167	0.957550757716379	0.637869792465182	1.71729976761687	0.814767757152078	0.377456497503117	0.059492909752431	0.42086382390675	3.8271617998845	0.805567803334388
2008198	12	8.96225747917264	0.0747300642784345	0.0567667004980589	0.040696130221364	1.76499931331386	0.0606621923824507	1.81208840133308	2.83430620447468	3.2717635723977	3.94744043200083	0.899956301337121	0.609017297871385	1.28260708500391	0.769895885388989	0.310093389398729	0.0444601748302472	0.293647103567152	3.43682202004027	0.937897899576554
2008198	13	8.21275873560561	0.500273243883261	0.0540028580448523	0.0126184305902687	1.98054620969881	0.0556613730254581	1.6859307922754	3.350434944671	2.8601186096839	6.00858935174953	0.844302489853805	0.532692860973583	1.05032057921505	0.647990155408282	0.256009970469344	0.0348569534372298	0.164350288602354	2.51940807311	1.0766772982089
2008198	14	5.98139926156447	0.54637527083174	0.0509490295793426	0.0718469406880915	2.18970365681081	0.0422498890082946	3.08819339568749	4.51827295382528	1.85413279512115	6.12733106847275	0.815496227878642	0.436221454681998	1.3231874552938	0.550478931815186	0.200467873806873	0.0286095932942386	0.115159545590423	3.24924856246982	1.17029250579005
2008198	15	3.76138315573136	0.476251801376578	0.0465359785077067	0.215910216002828	2.30394857234319	0.0391489598034024	4.14837376380166	5.44249772979029	1.40938632935367	5.13260229795547	0.775317734074944	0.411610601207446	0.766861737793468	0.397329928439071	0.165411092618956	0.0260892731615977	0.118154673878712	5.57106425589641	1.156587463973
2008198	16	2.87271284168032	0.471060955118549	0.0410397199236393	0.416555487306141	2.34205413566204	0.0570269704931673	4.18941970522951	5.85589764097655	3.54374812070297	4.13147077447622	0.715762330029394	0.508010655320124	0.317265957677822	0.256536509379259	0.149173694026179	0.0255242404129483	0.342513479117433	5.60307945035205	1.02077332890469
2008198	17	2.34413151075185	0.50640966009018	0.0360690940750529	0.601816636323618	2.93907287662223	0.0555460986260097	3.61530529282073	5.66031696835754	4.52972358562262	4.49803268233576	0.631173991510672	0.637774672537537	0.240640983995012	0.159954938428102	0.13682517461659	0.0251752498245293	1.21957583257279	4.81993653435895	0.999732941952124
2008198	18	2.93508521322247	0.495460766371036	0.03315427627303	0.649677705125625	4.31109336220099	0.0492857414046295	3.09061500098449	5.03450573696916	4.20851169449425	5.40550820574697	0.614683647898902	0.672077438830102	0.568777957904978	0.0870357066651052	0.115194350846753	0.0257940053305325	1.74814212794389	4.32642017096613	0.980293999222838
2008198	19	3.77143774806085	0.441230894329565	0.0304105095108882	0.595747729247663	5.11522974692172	0.0608410609181185	3.12309632496495	3.33065499316998	3.31632705440706	5.65919237634954	0.706020287508854	0.632561702488485	0.691439180058787	0.0531326413666298	0.0711564659929958	0.0268625251973314	1.65216814761742	5.191023576657	1.08697119594372
2008198	20	3.60831203405297	0.419575389517009	0.0269357251881416	0.55246065332318	5.31408663245502	0.128410839067017	3.34764982212589	2.09212239483655	3.23032920817576	5.87846272724929	0.866226161623075	0.563285923438114	0.634509220751921	0.0571581488921652	0.037964368899198	0.0249286279722831	1.53822497454879	5.52922619156788	1.14669278899544
2008198	21	3.08457712862077	0.536375009363506	0.024018324275155	0.535336918891794	5.05818051030876	0.190528165689618	3.46548928724727	1.65278666365306	3.87018874862902	6.00613455417183	0.934050163459957	0.503780754109764	0.588204870854735	0.0472540016424724	0.0315231670239714	0.0228652179876355	1.46967788289968	4.63516906906909	1.04737559200813
2008198	22	2.56993909168066	0.844667762356843	0.0216966599354089	0.546962950729917	4.40465725119917	0.213238251631409	3.6454301313688	1.80085365161503	4.50166483592662	5.83973530330304	0.862920488873003	0.437683462182975	0.578270735568116	0.0454122361610501	0.0280700244219362	0.021595237914737	1.55981794712822	4.42626767400961	0.95439129753299
2008198	23	2.32889036481796	1.00647033171259	0.0195559182986103	0.696297639111444	2.84516042076224	0.201547007763202	3.70067447408733	2.50379191404298	4.73431311269543	5.43285921354869	0.666161780881804	0.407757474243696	0.588499742088423	0.045306623305747	0.0247078068654034	0.0208686165076491	2.1328656464585	4.34188501468578	0.864142246328181
2008199	0	2.26609553433117	1.03742737712895	0.0176950061062236	1.01993726364222	1.78140538426657	0.189507324542864	3.3939027976131	2.5914248767808	4.76499314493837	5.29283472886161	0.540961064120643	0.404951981430342	0.744982233618349	0.0483667364305047	0.0182221771066788	0.0221592405556187	3.07016587093707	4.01877491777603	0.800803965014977
2008199	1	2.67277995546987	1.14760357954324	0.0183174956121305	1.30406964211093	1.47450054199053	0.197755309334176	3.13118150780469	2.37160694746664	3.90674255432977	5.03548051020581	0.4841448418488	0.36653397331015	0.902911566631889	0.0481307465602258	0.0131870706014748	0.0255819527507477	3.36417492454516	3.95974200732088	0.734501013850029
2008199	2	3.6514860443088	1.25337924186958	0.0182370310387317	1.39963767189249	1.70780952820985	0.225520755308625	3.2786112553136	2.07426125603832	3.02945128348973	4.47695201656316	0.460484503807593	0.332079586723608	0.874343580954048	0.0463873014306158	0.0160575892844461	0.0397881338816454	3.15501458221962	4.30361933412275	0.702701684280787
2008199	3	3.85572673529022	1.08958229563157	0.0208718956509437	1.40313426640172	2.05094819999336	0.262437814899746	3.2462490488563	2.00446926561554	2.37065662258148	3.67541825857512	0.44580101671606	0.32226701094999	0.802324172705443	0.0436402249885281	0.0278221356026995	0.0384004216200132	2.84474145265567	4.54563188182704	0.705156991349018
2008199	4	3.79535375531813	0.601539081997372	0.0278867016778267	1.55856642718062	2.04271754799638	0.325107168165482	2.7361866372289	2.34765569930134	2.2665201773701	3.16008112593537	0.427706253845292	0.312417411035995	0.703242781846159	0.0561939085361642	0.0527145958978782	0.0154101286198596	2.08969384232368	4.52400753975724	0.771656378011455
2008199	5	3.40099623973023	0.545085858971929	0.0443765568659448	1.58484182561017	1.93793369104541	0.458953672893357	2.48902538073036	2.52650503083478	2.23548038943527	3.00395391537135	0.411055840398178	0.294261226498704	0.693432375865585	0.0857222199033278	0.0630729616684397	0.00399957091239193	1.43300213758359	4.41408686048062	0.827785014317778
2008199	6	2.66218098178834	0.594588264617635	0.0598784282984814	1.40093462850626	1.82160559169696	0.617166764305668	2.37173514294427	2.25536456544278	2.18541455647347	2.93026900495962	0.387618024521576	0.274260679015205	0.831304056173673	0.124095873394549	0.0614721445151726	0.023894590886738	1.31046400839991	4.44608184984625	0.818329251485695
2008199	7	2.1316979508661	1.12281024762097	0.0692041113472573	1.25321432518641	1.74325482283844	0.603098283409205	2.25765363476319	2.07592058359202	2.09127228062339	2.71465284022886	0.359899253193166	0.26387261085037	0.91114401637567	0.124693091657373	0.0561805767972227	0.0618114022224379	1.47360759830063	4.39703484724007	0.801000573503025
2008199	8	1.95251558477389	1.272102622683	0.0663678194160064	1.12605113334342	1.73120831150222	0.541567271110882	1.93610359855631	2.0266945977028	1.93422331738763	2.6249700314473	0.458650773436189	0.255688823749433	0.810421213135224	0.139090122753894	0.0493251499174205	0.0750628537797254	1.62408569652602	4.29984832253549	0.801633071945505
2008199	9	1.86762093492407	0.959246383506007	0.0625010310544065	1.00850962598037	1.67757242087708	0.446126380204901	1.80850863635547	2.00099105278817	1.6225765914666	2.36336617377038	0.754211023547556	0.245853856064934	0.668595375173969	0.184688846553593	0.0431343971366433	0.0741851179056585	1.62650395770158	3.86812751486966	0.758305915667738
2008199	10	1.7928417200594	0.701387850251278	0.0599438731888067	0.819965029373433	1.54447952559431	0.410855232795047	1.53756691425938	1.87464175247118	1.40400550003471	2.11167394942781	0.808673013469706	0.242374180244525	0.597001377470394	0.217607201312933	0.0385229823936692	0.0685929351213206	1.56930859867371	3.51269012065293	0.666901195616715
2008199	11	1.72600654295864	0.515719042664197	0.0573606990870281	0.699468316119288	1.47870044291483	0.422211961511933	1.29594298997958	1.67347639828452	1.26097217415018	1.772916687346	0.779971006075413	0.249045101637611	0.540981585246327	0.189417225979522	0.0365517104037827	0.0632043226568767	1.53129076160101	3.19852903644117	0.650855242043932
2008199	12	1.69208733109872	0.375320786415953	0.05730165745339	0.598347861304846	1.36553972983928	0.413332207367937	1.19970289531797	1.41732830274082	1.11912777459835	1.3879386733758	0.728806433958628	0.260779797078511	0.480346866721946	0.17730057075389	0.0471343572801461	0.058243430048405	1.49740610332539	2.80574104150438	0.729855131828842
2008199	13	1.66635437428048	0.270210738257182	0.0636659469310136	0.442922235628453	1.25748027236167	0.375661738216062	1.09059053561146	1.14936529459556	0.991478721907415	1.18801199030952	0.655536503755546	0.272413385688613	0.460662100295195	0.177620333888349	0.0659175715715179	0.0541861640220957	1.43640984800239	2.28548356943066	0.707852365863154
2008199	14	1.57664827860398	0.161244449955382	0.0740218948566269	0.350855444590915	1.18017586616882	0.327976426125339	0.918439852127756	0.955520298630445	0.873915292452836	1.04977718266614	0.66023923579124	0.274285134582698	0.477907240077941	0.155546872063811	0.0816867512801705	0.0534894008775221	1.35680303353383	1.72317188070316	0.610570260069102
2008199	15	1.32259768892324	0.108078587220376	0.0691456805720401	0.328872843611532	1.07496312541155	0.284443971455489	0.7369689926099	0.843009203141749	0.783248648770407	0.886393182115145	0.757358234110844	0.265488888220182	0.460574737144981	0.124932333979002	0.0944897771766689	0.0581837488633822	1.25704153026281	1.35763645950762	0.575089238580059
2008199	16	0.771745519203292	0.10220423974348	0.0600556921218909	0.278278953821225	0.906955831505137	0.241600638616402	0.622215084167458	0.758477969732627	0.760775243686344	0.752738684292721	0.857560723145977	0.251434245168436	0.436693233307159	0.102421891721858	0.105922198397898	0.0632869959693104	1.16573932596856	1.12399881284061	0.606246120891244
2008199	17	0.404281852852746	0.149903949106194	0.0528934875889197	0.172843573371042	0.730522932890192	0.207965185443406	0.521415847778351	0.602015289909529	0.817821047554555	0.650175851075459	0.902211813499322	0.232812021963299	0.378233388326895	0.0812530593331321	0.116184058237834	0.0669706726444526	1.07514259410764	0.956669331959606	0.411709285204946
2008199	18	0.369130405882352	0.175383424835396	0.0473893883260075	0.125056822803537	0.509469087079759	0.177739291418521	0.481650252197874	0.35880332616133	0.880093007673675	0.612593690682093	0.698855343790934	0.188544604710839	0.316960860812009	0.0711252747824729	0.119251661195174	0.0676941772103125	0.960579636560981	0.88271487029259	0.208096187700906
2008199	19	0.511604598901107	0.165787219780679	0.0442251078201292	0.132189064011739	0.32619105062309	0.143893183233365	0.496500312053157	0.137108750957796	0.828519360785967	0.60435752971622	0.690058558779326	0.165305406895843	0.263416479720827	0.0704410131159789	0.113567474068438	0.0673075617763637	0.753690635032922	0.859758149433014	0.15478196432784
2008199	20	1.31247741531938	0.142642148304024	0.0421916734221691	0.12770142673297	0.218816267546596	0.131294175284868	0.527724059256791	0.106483378747313	0.761484932421057	0.614637587647392	0.536335537103456	0.193878797987373	0.222288197153934	0.0804395684083263	0.109507780921375	0.0676312003680748	0.533943609260454	0.871582126625716	0.135279896000947
2008199	21	1.77007349034576	0.109030433510766	0.0412909676226575	0.0997212336554498	0.136494616850316	0.127498493839699	0.538842849158991	0.170764158693038	0.687883178493039	0.605515606969071	0.460360060868099	0.229366697683083	0.1980335906047	0.105156625793236	0.105574828416845	0.0675471224503237	0.390951502746617	0.896388088807124	0.0970387825829307
2008199	22	1.89043851188834	0.102861912151092	0.0406602163518736	0.092894276990308	0.0707090889837508	0.122552643399801	0.545398186653152	0.395943467601993	0.659949239834367	0.567255947795477	0.409501772935104	0.262239689452341	0.170911776275646	0.156616399491004	0.102437207201224	0.066708960606735	0.328195723733059	0.833527037189479	0.123411932269507
2008199	23	1.93802718946862	0.130883640251245	0.0401434713392677	0.0988704999171257	0.0759754388829665	0.111568981511003	0.696168094097631	0.838506226144296	0.729237169830594	0.498132652027634	0.386853920450175	0.435769511320269	0.177510762431908	0.222287476029073	0.0996483450834055	0.0648949722414441	0.332036558324575	0.597718567648646	0.212575938086024
2008200	0	1.73927237622825	0.157157102028203	0.0397131889711988	0.109976870712272	0.0941883790838624	0.101380120108651	0.72669952007082	1.31226395540339	0.772016655400741	0.370636808242209	0.43816185640757	0.564977859513263	0.223950118233296	0.272423156738203	0.0966890897538019	0.0626044913371678	0.33926692532928	0.399367674162791	0.295804521154431
2008200	1	1.96978490103556	0.184215698773231	0.0394090405409735	0.114287189746505	0.147940525714206	0.0949488796606927	0.633880539084391	1.42386703921666	0.741413102888315	0.246247717528861	0.42975643168036	0.480191010537637	0.256073024640554	0.328302609485764	0.0926506992586904	0.0598824911906484	0.35135452450913	0.338721785618912	0.452427438279409
2008200	2	1.81029836267677	0.200120829870911	0.0431158430862005	0.10471475037473	0.288203340247266	0.0897795611027512	0.546132644912823	1.24499859188789	0.670074806704486	0.223659169168633	0.410909031081117	0.486271489036959	0.307418908976629	0.383003981336487	0.0877993878121757	0.0502165662333955	0.368217665468198	0.29323856547087	0.648151009903873
2008200	3	1.82375255340211	0.206256935123541	0.0861248384942905	0.0930901735061267	0.422471925715048	0.0875697765330026	0.435974404345298	0.7928185289405	0.531175418316888	0.259461948868741	0.419900251830752	0.600784375196506	0.377359149325079	0.488552337805089	0.0856592672256284	0.0506810457338588	0.391875294849265	0.298464251078763	0.696393175608232
2008200	4	1.6303410660333	0.202882855308742	0.105909163900362	0.0780018901779534	0.470873552668646	0.088738512120994	0.372720111408449	0.559910999551878	0.399130389419458	0.412089811414512	0.499299663436252	0.679235451373266	0.443199214750558	0.499791632280572	0.0809897825905026	0.0563407222455351	0.276535160220752	0.314579175061659	0.694104886861946
2008200	5	1.71414366531447	0.185374519853453	0.112802303886682	0.111020765053264	0.419623606214286	0.0934361403456768	0.68540204079205	0.554444018502577	0.415756090396403	0.364983694132129	0.565895605241035	0.683628082519074	0.541774110631524	0.455770036769917	0.0805084939574667	0.0599180622393675	0.255922735279313	0.312505812166879	0.754482571177915
2008200	6	1.39991508446717	0.107380135547642	0.112951403104515	0.133375870959445	0.376225401346267	0.110564827461814	0.853932681483374	0.605388663451216	0.437110930244517	0.280279901078012	0.581391859820225	0.680860538677656	0.646182217037338	0.278051327533464	0.0893357792282105	0.0609363313255885	0.24449215858142	0.337566687907994	0.759025559655812
2008200	7	1.0437990547535	0.0316258485985939	0.107847607918995	0.120421723458115	0.340093505250063	0.187176596207782	0.470637829851989	0.591790395879501	0.490049584720442	0.249287464783117	0.569359608230355	0.644732797034081	0.67684315460894	0.216657138717253	0.101762132240341	0.0711064632428524	0.228865975169831	0.392621963155318	0.746801673809716
2008200	8	0.639068930793501	0.0249233564284687	0.103219458510835	0.148954596478088	0.309814148030264	0.226916769559874	0.205600633614169	0.46004867283383	0.713643204413562	0.269730415925953	0.524382936394991	0.690643512495613	0.624554714956392	0.229391483465327	0.111251514796831	0.0835286418316471	0.210062124840639	0.387144971235199	0.732766870753792
2008200	9	0.450812107883845	0.0209875962275553	0.102811872509999	0.200875895396189	0.299689574726987	0.163672421515801	0.14919083563675	0.396663702744617	1.21790371261464	0.299050573732547	0.464014666950753	0.794468699229393	0.491931096818354	0.219502545444797	0.107696388215533	0.0811192792628089	0.196205768073985	0.348593582088555	0.694167429504942
2008200	10	0.39804952266033	0.017142706824874	0.0970981361228192	0.242264437502208	0.312167063110074	0.120664144725366	0.136854700027843	0.340536794953557	1.24328459538036	0.305615384671194	0.434147623421041	0.82114593630347	0.332608326233949	0.173602262137059	0.097828681236379	0.0681126264661242	0.184815002821037	0.317799988042152	0.635585148627549
2008200	11	0.383575642989768	0.0226929961372641	0.0825664189209375	0.228086939510017	0.334361478909386	0.106909289151715	0.13392684494294	0.266840423227689	0.656017997787441	0.326526923190177	0.409609058514766	0.789138930448451	0.246424679617696	0.138764309638829	0.0924714757970823	0.0474483002576308	0.162417259360476	0.34894519952285	0.599242755597141
2008200	12	0.380313307329466	0.0270951273344581	0.0712145174257863	0.171050658094756	0.317992253439316	0.104194889664163	0.138334045442647	0.193792516679959	0.407059058526399	0.358588771415861	0.406333577409434	0.716161086287375	0.203484223891095	0.118431961455218	0.0912328564454153	0.0479378736385171	0.141276221669956	0.405127730091919	0.556204484698054
2008200	13	0.388661300183898	0.0306962537044634	0.0609282498211828	0.0971380586145533	0.282031745999611	0.094303370126052	0.15586422750885	0.145807338003226	0.363169562767206	0.385997717032987	0.399132810103472	0.669759325211642	0.186035344345632	0.109969422454278	0.0919168241349478	0.0536704461767919	0.124039320775337	0.355306696081225	0.411585548218567
2008200	14	0.411386293437474	0.045629040554547	0.0600006488430615	0.0457669475871946	0.225869559742226	0.079614032349042	0.182633390981465	0.140673360407474	0.316751561971465	0.439936719519876	0.41427413049696	0.621655762810043	0.186948078657231	0.110366790627293	0.0921339480038329	0.0620577563819909	0.113557336368256	0.31191062175223	0.32137584666707
2008200	15	0.423932319133476	0.0924300341022573	0.0938828208642534	0.0264755972989124	0.160286758738269	0.0556008513518924	0.215887943567266	0.141664151349999	0.26800546133202	0.598946550646093	0.461446108548937	0.564261393449995	0.191499180171856	0.119321945525207	0.0905615509010476	0.0671728465916221	0.104250336035081	0.289407771389993	0.333260862468638
2008200	16	0.42200737292557	0.120275839207769	0.121397466972258	0.0199885221187436	0.0967620136114842	0.04838298297382	0.244356811574122	0.150872137289288	0.226439205839829	0.810590138346229	0.519425676389653	0.501647788090497	0.196115772923708	0.11332687850207	0.0882276221475552	0.0698454764678712	0.0966151652767701	0.294950433686801	0.428922027532849
2008200	17	0.4137129339273	0.113108223396932	0.105710012200289	0.0178689190193729	0.0522881154875434	0.0456404212850973	0.276881605398042	0.182290447892527	0.190718936449046	0.886289001142165	0.592642320269556	0.448797201912765	0.194123025030031	0.104380544215832	0.0857798154779777	0.073889386245319	0.0911371429818275	0.301539415568933	0.491437488531353
2008200	18	0.404752814184741	0.106996049479925	0.0904801124761843	0.0241983333506495	0.0357187825286094	0.0397122820576116	0.311557465389812	0.255153502491398	0.175715379600434	0.887574423673379	0.820861314728092	0.400065066262	0.187544647251084	0.102679857354068	0.0840517069937878	0.0720965883249155	0.0870517362022274	0.298339262672215	0.463794116172088
2008200	19	0.401057802492396	0.118904048896085	0.0803838419652356	0.0307828143043092	0.0291136208204022	0.0336514644404989	0.369230568767473	0.347008000514736	0.176095340700959	0.874442554514383	0.953361283218362	0.385161319080921	0.178854819441886	0.0992410442375281	0.083004833361689	0.068492295122471	0.0807886391477109	0.301101733254473	0.44049316625114
2008200	20	0.398523286054039	0.139268793358133	0.0737515127463701	0.0333720329359663	0.0309954184635063	0.0401506144876906	0.4255267269188	0.420074660841455	0.185386555810791	0.860486278034982	0.896287593019568	0.374970348988363	0.222746929297554	0.0949905022648331	0.0820742773132011	0.0626023884480724	0.0744546026805552	0.320973492737132	0.456645698519766
2008200	21	0.394764384258194	0.180307226908537	0.0702118675250099	0.0403249143480609	0.041842659275069	0.0657510412962717	0.440674971814403	0.473056313861428	0.201920560210071	0.807624928312398	0.77144004325229	0.367391509525813	0.29191254284033	0.0922958098456524	0.0807417963106107	0.0497020184677786	0.0656426458289959	0.343746321399909	0.396440045191719
2008200	22	0.404172167031994	0.202482126822699	0.067677553008798	0.0560151547212474	0.0595634421451276	0.116931469404744	0.41976111855266	0.526282183678887	0.226915992971165	0.757334316760914	0.810920112483733	0.367239612684768	0.30655873213254	0.0916596316078889	0.0758685895297448	0.044140134575686	0.0600372819037668	0.37407324604395	0.342175031995699
2008200	23	0.444893213099406	0.187195159134512	0.0703610104473621	0.0743855557190363	0.0754321798145831	0.176856597224198	0.375059162981363	0.579952636282765	0.253535154463729	0.691856431927866	0.82116585896113	0.369500050811175	0.324625106494793	0.0916437535943756	0.0482833525294398	0.0696881694562052	0.0612629132859605	0.41956771501586	0.281797414488825
2008201	0	0.533863284901388	0.185138418876921	0.0702284667174892	0.0883519135706232	0.0826722339781059	0.206396009966368	0.340678921590008	0.638500685370316	0.281903756836441	0.615341950323429	0.687707035156036	0.376680677316452	0.385630916179536	0.0918603845795833	0.0294655231766802	0.119252790720438	0.0604622546938726	0.478873820035449	0.240584759828613
2008201	1	0.656762447178722	0.189208629751277	0.0689140733296287	0.0963748883206878	0.0843076678389359	0.2088723588989	0.314191253607043	0.647745151475758	0.309015343089096	0.560869785011196	0.676634396488889	0.401912140546074	0.550459070315739	0.0922805144506796	0.0257491022404831	0.112575126860096	0.0650934660086727	0.551875748298062	0.295437170929968
2008201	2	0.722695832176148	0.200610521998341	0.0682639387009536	0.112858275562609	0.083467063196428	0.191070807532122	0.293552911207598	0.573873777386465	0.329638301515512	0.603682072308361	0.568030891067887	0.440864355354798	0.76187498899224	0.0924119498703466	0.0248567945080211	0.0843910028417447	0.0662409482554351	0.61717308174954	0.365860525173279
2008201	3	0.662279953210982	0.19030161494762	0.0681374735586119	0.120031087134464	0.0875500895345007	0.162195182917467	0.276656673187675	0.45478900178433	0.348302575287605	0.471434992830007	0.464341530066569	0.487614690493996	0.824241399393254	0.092675943307462	0.0375713732464016	0.0735249106889849	0.0651807159800611	0.667988146336899	0.372435210502241
2008201	4	0.462006755101082	0.182044253598865	0.0659617862584713	0.127164345874845	0.091126088505148	0.113926334648263	0.258701568848023	0.316393469593188	0.370059663502155	0.410696041465226	0.351575199098841	0.522274626249842	0.819329310890517	0.102019867953092	0.0497607114773614	0.0901134710180378	0.0634391915055959	0.727733962279565	0.355735476794935
2008201	5	0.376673628697715	0.151207752012867	0.0648863401353041	0.145739583893663	0.0986771388292586	0.0853171395857497	0.319144378788021	0.237018998822637	0.396214925370402	0.54851271497648	0.302292879539204	0.529665616424211	0.836149088963879	0.229419563969234	0.0510026183631779	0.106460562977272	0.0617717099263347	0.795742777900314	0.373308704654745
2008201	6	0.268131727047731	0.0987386162899113	0.180035370858843	0.17795422129314	0.103762905597717	0.066998660665476	0.43896790419016	0.240392887475509	0.425492684921915	0.508266860210244	0.296097409699554	0.479778884961707	0.961328847153416	0.542379426830634	0.0472390132565144	0.0980803860793814	0.0639086726820433	0.881895300998882	0.396670113353852
2008201	7	0.61497770478502	0.0732968305179693	0.274888782835736	0.194434492082831	0.103151320860056	0.0946192695136987	0.38325540696234	0.259555090536532	0.472045142938761	0.420347518960469	0.311778155856809	0.396059840340171	1.04725944462553	0.969589766791876	0.0424461050150737	0.0813581262257656	0.0715807895778939	0.867481523946353	0.516648385786868
2008201	8	1.21156064446654	0.0778644655301919	0.24680053308201	0.208452444378183	0.0993708654534739	0.125118564311568	0.355342027390166	0.326017121684158	0.518147872574295	0.381089546955976	0.31117940980915	0.33337958826116	0.755885126392289	0.923781177968004	0.0349686538271997	0.0585965897910153	0.0790425692166722	0.739603830480487	0.777576375160492
2008201	9	1.52371670368677	0.112501188104178	0.217944247527095	0.194682702042758	0.109494627232708	0.117417970653825	0.347328487160351	0.301971569550847	0.535276439713763	0.170613215500168	0.290052771221663	0.298311478602654	0.629091938488371	0.670146502172528	0.0299947352336819	0.0463284122137569	0.0730168918348948	0.606795722824326	0.977523905233925
2008201	10	1.64083847829683	0.102229000631046	0.196127199890464	0.144289327146808	0.152991256939109	0.101106231369077	0.254037881881996	0.183013450233072	0.538660779867968	0.0280441329902527	0.265769213095646	0.276410062582905	0.571293752047455	0.493320797021436	0.0274099263119817	0.0519334734305257	0.0580776575310095	0.558999780501667	1.06979570121428
2008201	11	2.30003487948729	0.115541194816979	0.177229774980398	0.0607437272465652	0.185262963813226	0.0957182070559483	0.120818086792241	0.139756736131611	0.514297111620041	0.0522011254348573	0.247128240545037	0.250477984495974	0.537995871160975	0.397334181118427	0.0252293142365497	0.0609448804458752	0.0437823760065419	0.561663304093744	1.26945535164844
2008201	12	1.98473633229062	0.0984355713088405	0.166469398088211	0.0415845744934465	0.145557000688705	0.103928939302986	0.063600281353615	0.198675766736681	0.45353617544361	0.312248341877503	0.237597418081434	0.240395545984626	0.492262024034322	0.342362304132421	0.0256547757318227	0.06424476472173	0.0339712709003769	0.573093532985727	1.4262739449791
2008201	13	1.98166731399403	0.0712515362710606	0.151671467508068	0.0567440851436774	0.0645494646883051	0.118296387950336	0.087168854854018	0.212597673369909	0.383555978959146	0.576882809720453	0.23693169252785	0.222653468869551	0.442361468589901	0.292228545750593	0.0255138697671224	0.0739177220069514	0.0282785208882764	0.559218726453225	1.26856634830849
2008201	14	2.46289359583498	0.167853106141431	0.115431563135029	0.0708999562237793	0.0452218899095285	0.090864609486755	0.114029397740079	0.181914731478145	0.302976941307656	0.613308041955459	0.244180615604321	0.194319755361928	0.419184886560333	0.253561189132885	0.0241801837912223	0.104122383059586	0.0236737407267759	0.518317497899992	1.21117125518535
2008201	15	2.70540174373746	0.320121614639971	0.10069734501941	0.0807030764676867	0.0622139399210889	0.0452077122271848	0.111662216791619	0.17476983689771	0.22319139090101	0.64950009739316	0.251395789723554	0.166095205686801	0.450394778759528	0.229515111879521	0.0257095533212068	0.129940276315955	0.0184319756633761	0.461778075156322	1.41265388384229
2008201	16	2.98328726455508	0.48203871339174	0.10939522903449	0.0750734452686642	0.0527061699222621	0.0889130253160518	0.128143885634519	0.231999211819129	0.214204013550722	0.617992579449947	0.269299051637488	0.145940429284695	0.577867102418543	0.209816880898737	0.0268014846887981	0.12201471540673	0.0152692884940104	0.412417827388367	1.68011349416435
2008201	17	3.35824969893106	0.551706366400784	0.125355690569686	0.109370406237711	0.0316016924019757	0.156606828713695	0.15182558428317	0.570691714443447	0.226984675362015	0.558739587420614	0.288695297488804	0.139435976070739	0.714307398235103	0.184144132540793	0.0257014597165982	0.108553857297062	0.0139113546316157	0.323481166270543	1.73494804328901
2008201	18	3.11867700876504	0.52324576540758	0.126416533661591	0.253890534754512	0.0993226980056346	0.139012190022579	0.188795264168223	0.998874218273075	0.232651086585706	0.49999799550285	0.316430271272327	0.142808007138941	0.73657365698236	0.140235202167406	0.0246235486885031	0.0945710950888015	0.013830571370289	0.324318305008741	2.07252921100882
2008201	19	2.45235443924273	0.478853394681646	0.120737408492393	0.365558852808442	0.279317669862288	0.125607123186394	0.182544462237558	0.804221680059708	0.238434547121567	0.52734219954836	0.356184182764699	0.146371307284406	0.603085161008704	0.065345701195177	0.0261062922034491	0.0769097975045734	0.0151513862546438	0.366143134331709	2.33398302424981
2008201	20	3.35147880315382	0.412072031523008	0.105158548873676	0.377754065647126	0.301141028651632	0.10947689980345	0.293707280211584	0.894844823063973	0.236581574299958	0.536038210826254	0.389247581865511	0.149053066008983	0.698906947524632	0.0442495081918366	0.0249004748455065	0.0744288120942021	0.0218733113155464	0.341360681748611	2.16469143322311
2008201	21	5.14266739669242	0.310837499155859	0.101016050076332	0.382109247910777	0.349098907915204	0.089498180570418	0.373154508700661	0.808105033399242	0.253408387412636	0.940209587120642	0.403966825127854	0.151012228020741	0.695676717273527	0.0499802516707451	0.0256622349748513	0.0750249045703688	0.0367372755015401	0.26529034610391	1.73667163951492
2008201	22	5.63364971371629	0.37344542328107	0.10225279234023	0.400742104929442	0.548774468232663	0.0668814254019899	0.596618811133364	0.715772216299914	0.361668056114167	1.56517492300083	0.421292972582467	0.15099347843531	0.412313458945767	0.0721141875330876	0.0358885133322958	0.0766752166302536	0.0462702765862565	0.254901966682895	1.6083587309634
2008201	23	5.48418073528384	0.656449048482123	0.0997105715581056	0.330852349846002	0.546892031283973	0.0797653866916552	1.28957735180443	1.11582126081297	0.620980744541506	1.92378901228015	0.454412546074442	0.141150008999281	0.149654895614466	0.129693309585264	0.0477173574734018	0.0786262707683317	0.0341548960372121	0.231685140953383	1.82356967127021
2008202	0	4.3883720842451	0.673157893912931	0.0984597951611726	0.288289416976817	0.539063438978013	0.152339605235451	1.46828665261676	2.05873598606885	0.702378606591871	2.16828236745043	0.495884865423613	0.129359821620377	0.145179864164688	0.130550458204587	0.0486524127384531	0.0743615168564161	0.0545796139880486	0.206671782840196	1.73049490474794
2008202	1	2.69925443480164	0.714496364381508	0.103056709504484	0.372639542580541	0.585326222051265	0.315121033124325	1.66559567301714	2.12672622779583	0.834190508653543	2.47919030815135	0.506069185126406	0.121248270760496	0.0719361731802054	0.122714882191182	0.0453122046904997	0.0710763976780039	0.308338802431504	0.29978039811145	1.37400840422304
2008202	2	1.11654502736002	0.69546140119366	0.107676700667674	0.517469457876756	0.800410184150866	0.455302099797251	2.20084651815603	1.55287193416444	1.19950940132329	2.60328890207268	0.519392350792818	0.117480539012782	0.0829445241415582	0.106480485202932	0.0436825141963089	0.0696017389117765	0.487083669382665	0.415942313484562	1.48361381577636
2008202	3	2.21211306171558	0.473008264563818	0.10999274112899	0.441701964683313	1.12312016129917	0.419065189564726	2.37887460918086	1.87760005683955	1.50950485561592	2.41617406986941	0.579384489624689	0.117296379110945	0.0885514027879565	0.0609947286299577	0.0393519378785077	0.0587146157960447	0.385728209804198	0.524177447358902	1.83773039595563
2008202	4	12.9965758546483	0.341413173903418	0.109587866847635	0.52589249361915	1.02309747858793	0.312451035117503	2.03815926520567	2.9609201886809	1.71385473126485	2.14521870071332	0.62082263044867	0.115319619828994	0.115179010877673	0.022055407370155	0.0402133469923001	0.0824142809426536	0.318444633196751	0.773669665938286	1.85325534842904
2008202	5	16.8369151824407	0.673047965081218	0.10808895118455	0.50068143054702	0.916238149190109	0.253564663401168	1.61452272708474	3.12580261423355	2.46473896304042	1.76494781398074	0.560315325856902	0.105154707919423	0.105826325940292	0.0253183253473	0.0539501026777928	0.0946609410513166	0.338905537165126	1.15934431316498	1.78941663540983
2008202	6	15.1846991925208	0.955532047931893	0.1228329142948	0.304254377294391	1.60380682589641	0.237185505083621	1.32956650811077	6.8370764148259	2.46737408731163	1.32739065689154	0.428270380283325	0.0769715341819364	0.110397778103877	0.0401607943382513	0.0681491702790765	0.140236105250929	0.47824837841516	1.53508762648446	1.82393003971903
2008202	7	14.9687871385143	0.917637857079583	0.145190393540284	0.129066926767017	1.63967707620359	0.331432843417024	0.95167731463924	9.87789982396835	1.9716245186099	0.854827249951226	0.365949661114695	0.0313819370507955	0.130070986638809	0.0431168705358446	0.0725795955874419	0.273008739609914	0.662852705928248	2.03131873551983	1.96497269911796
2008202	8	14.6923341745496	0.872227469939867	0.138368616008997	0.668540203001622	4.05336658432536	0.320741792580644	0.677834384833944	9.74399857226352	1.69799549443315	1.15619380480938	0.355376710768696	0.010462534295608	0.220946572881443	0.0462637974366335	0.069191557729011	0.274729773499354	0.72399966786618	2.25800345250043	1.98898379596573
2008202	9	15.127927314109	0.745801907927514	0.125114013433912	0.83915571554545	5.88840063102182	0.292335526707571	1.93200441231091	9.21675633186188	1.52022806845886	2.81673137041583	0.352204678594312	0.00284242458246109	0.468362341288274	0.0445185522336153	0.0697097748379902	0.2634757510673	0.697103766389439	2.06496221829772	1.89998346706114
2008202	10	14.9211663283882	0.59523700412823	0.119382542372931	0.748500416771918	5.10024795102603	0.262625457577143	5.03104689673695	10.0342592547704	1.16337235753247	4.21127945593711	0.360450514451351	0.000849635620706936	0.730638554601113	0.0463366923217177	0.0637480585723105	0.288453119022113	0.575065770808148	1.61585411155101	1.72355691195702
2008202	11	13.9020247076936	0.612920163482174	0.152660527218278	0.630060852321209	4.81435504080497	0.20966746269337	5.7514577133862	10.8186353291966	1.43559206214536	4.31255220843384	0.397242970318225	0.000384066745611074	0.868922451030865	0.0628035185750506	0.0579452521140998	0.282477973755437	0.516778408433305	1.23522658682482	1.56406659942499
2008202	12	9.07622344132898	0.670137739566467	0.200615291830255	0.509761526235266	4.29174454026854	0.165677569842562	5.70140898600315	10.4136535735265	5.1891872593754	3.15399830569772	0.465973720596401	0.000283034594927084	0.901913638087351	0.0871324935856705	0.0588095084718508	0.256099633097003	0.647857085918968	0.971518137863427	1.65177420652098
2008202	13	2.16210078997096	0.625980051436725	0.212488628886569	0.413077841559335	2.35088976822911	0.141367777418584	5.57042318108233	8.70121691445303	7.73170634539112	1.71412403638142	0.565472435248997	0.000155439079148211	0.867818211579565	0.0974057261436911	0.06596448409759	0.23845209297608	0.945234125617678	0.818588518077951	1.70115647494649
2008202	14	1.44817373619359	0.536785285679382	0.22342970376211	0.412038617608515	1.5051753310918	0.148060700328226	5.21807629815836	8.17518548245615	7.84461787961489	1.00697011569109	0.662091155829242	0.000120194656241332	0.907620778472587	0.091527825915885	0.0863730882870384	0.231201857998468	2.11355194422626	2.56706343429331	2.09520831156313
2008202	15	3.08213424558094	0.632625142522304	0.257045796250931	0.442212501347056	1.58116710908952	0.199769204225362	4.06049128559652	7.07528699839264	8.30557927701449	0.622462045526559	0.682579298794817	3.80620819844547e-05	0.832474322166506	0.0916069418642363	0.129028129752675	0.237081737681663	1.99012490030462	5.90441657933982	2.42556993312358
2008202	16	3.38677499080539	0.625742681637261	0.288050172562082	0.465090193350152	1.76908044707347	0.190389545510293	2.71962841717277	5.59078297947388	8.93166980034545	0.526480356354844	0.514641502397748	5.36421773875316e-05	0.774884795152227	0.0916960579857455	0.188550880078147	0.233015053657009	1.73921967900779	7.51913143341718	2.56055786027752
2008202	17	3.09150462789613	0.540462023575634	0.296695443542647	0.468958052023943	1.67520816740145	0.164879173305598	1.66246832717404	3.48427485453689	8.42384047758442	0.456181334463651	0.501601314655835	8.46294479218687e-05	0.687256394334539	0.0926268848677384	0.216415686274295	0.222145944195554	1.58452327726733	7.88484021122652	3.21011111866677
2008202	18	3.05769545914176	0.840922015948046	0.260184762135778	0.446507810745164	1.46204041205402	0.149713531017559	0.822989775626409	2.09438714485202	6.77835042124263	0.513659227977376	0.496216837667278	6.22330229128053e-05	0.613691472251864	0.0943445652874499	0.204892809846287	0.204475820365089	1.43082515326733	8.17013617029973	3.95267550968911
2008202	19	2.32654014630871	1.51379200689955	0.178238231723757	0.43077006960459	1.36061702306981	0.117721849164531	0.594624094127245	1.57076463596818	5.09283240807954	0.685702719606302	0.491247286188884	1.21804156846946e-05	0.509487909571261	0.10257343466109	0.203161016023312	0.189084123621663	1.08186382251199	7.54829258754618	4.74175786826039
2008202	20	2.01621759106657	1.66329856629896	0.149084497690948	0.499027709770944	1.58958925109936	0.0981379175719274	0.576202820934565	2.08602595322779	3.68617225556965	1.75609214362594	0.477704029089612	1.86118821807765e-05	0.373557779413964	0.10043892486741	0.210809906115136	0.170952002395665	0.615209453008106	6.22641197077303	5.13959219464427
2008202	21	2.04305231897811	1.7012422227325	0.149273449405049	0.738115690098514	2.05330993543105	0.130776459455245	0.437158619394691	2.7175637001764	2.55968016416826	2.02907223950698	0.43094759213504	2.68312398872875e-05	0.285420224743541	0.104241054102695	0.206108463780494	0.159094969252422	0.289627059849974	4.5325563507918	6.31273919308756
2008202	22	1.97392877796388	1.68596749130428	0.133760666257668	0.911182204140077	2.07826581749871	0.215378677260718	0.438724580726294	2.40547101030301	1.87678765746637	1.7192976465352	0.338017168423646	0.000721741332211385	0.249725734886746	0.111572564060931	0.187828832961593	0.160656363995974	0.253079761949612	2.93226399216778	8.34315247742166
2008202	23	1.7690966639023	2.01784182733759	0.0992807236684541	1.01874943493213	2.43323614277587	0.246643019309399	0.432171378144455	1.67520330473976	1.50735113171672	1.34977977687131	0.24706778307093	0.00222742989974326	0.25279375886363	0.118162548141265	0.171650597116274	0.163213720533785	0.270897789099684	1.96972818503362	11.0456961023317
2008203	0	1.52326673278617	2.16408454608516	0.0720194125760878	0.981264784656445	2.27773690817761	0.231451854550303	0.384094737272713	1.56900088803382	1.22970758635281	1.10468332506202	0.191985235080689	0.00447406742611043	0.30194542962928	0.118489165525089	0.152179042063635	0.16421520076359	0.309100972816314	1.42302254096481	13.9923659067626
2008203	1	1.2910623505175	2.49692612371224	0.0777596063006724	0.871490668490797	2.49192942220134	0.206221108153648	0.319586132848185	1.68154209188766	1.1201806521926	1.0384210426395	0.176418614964394	0.00767709673352049	0.405552230858476	0.122848923885558	0.116534838856263	0.16258313541297	0.323367084371886	0.91773275929744	12.1293784092014
2008203	2	1.70100649804193	2.41022562756878	0.0925711906078758	0.99562257375391	2.83459227470727	0.211226695452948	0.314500670602939	1.68681301714779	1.00354018286565	0.930559580340778	0.177529607307136	0.0113922568384995	0.461662910338564	0.125053048265009	0.0852512511555725	0.160146761866094	0.326126298725724	0.714476660838014	14.3275523811426
2008203	3	2.48497921147988	2.84954056982248	0.0881789547661572	1.15760195929402	2.49808550465823	0.222153717116648	0.352652506230971	1.62244813865766	0.893189187514636	0.823551728984961	0.194634740145484	0.0211739603397479	0.345733045269914	0.118846453661214	0.0762314143988541	0.15744510044802	0.295000372917154	0.430284181166934	14.1769638638464
2008203	4	2.58770076405466	4.10116868618709	0.0831972087566779	1.22342538843907	1.88656821336411	0.216584940974161	0.409546555326204	1.6071953557995	0.895552940797206	0.782523731678219	0.254118429010711	0.0343256709028623	0.0583772646658191	0.10426442680717	0.065387793132611	0.155105604621955	0.318553890555291	0.308437545496519	12.2057048892444
2008203	5	1.92042967863924	4.77355108443386	0.083120307169897	1.49376123727316	1.34177014989794	0.27264224541318	0.469162913009014	1.54469015480291	0.963264574090609	0.71300781147057	0.295670151199415	0.0519478771251596	0.0048721854111916	0.115210192509806	0.0465995219749448	0.154018419417367	0.281796186371335	0.249152363423916	10.251429239429
2008203	6	1.14445160016753	4.72427945872681	0.10121001398687	1.77031506688072	0.960185941734544	0.541556250651544	0.493946608460093	1.41510538931952	1.0532127247175	0.655919569116055	0.282434501789167	0.0681378065833858	0.0112821997914135	0.125782320429929	0.051168826558	0.141065128380955	0.327725742702928	0.215141034410106	10.1052229796955
2008203	7	1.35252185701225	2.00736946481701	0.192596314709316	2.55555255658106	0.753440970210177	1.06107098294804	0.540802003185499	1.31633059743749	1.00694669982655	0.548953030051658	0.266004747319475	0.148951525888679	0.100248576804345	0.122204032136	0.0688328538451477	0.0974082864095902	0.43693831770043	0.276653633427663	8.57246377996211
2008203	8	1.61804440827424	0.239178369816468	0.179958148289769	3.24263143891987	0.700624599167923	1.97055012981883	0.557022853648692	1.29280555692972	0.997507696958593	0.481946517677055	0.258475702684141	0.189372103375966	0.139943590089372	0.111943400459872	0.111598772738248	0.107648416509772	0.53206158978943	0.384570892601357	6.89391401223599
2008203	9	1.85755688318304	0.0787294563653947	0.159935850731107	2.86847610931891	0.621760362210679	3.24617074328152	0.52609403102189	1.40442223299558	0.998653946440585	0.442399169785326	0.261078625216374	0.210071804033605	0.146726283382671	0.100969239828383	0.120209350584785	0.0971486975284194	0.645426480388891	0.515138769349912	7.4959725803469
2008203	10	1.95028563207151	0.291498768908496	0.141649705585304	1.47663997068796	0.308629838767723	2.57304994094008	0.522970665888117	1.38501971263881	0.963297395960221	0.419434769705907	0.256314759798048	0.216295157358477	0.142328988943951	0.0891233299283885	0.115352895722065	0.103259352353263	0.809709541829883	0.607812065418357	9.09844217666032
2008203	11	1.77403506724758	0.557858707028352	0.122168459807745	0.184947403598013	0.179014698575719	1.92646311335635	0.534513357637819	1.39926072965964	0.873682577835316	0.40474232254828	0.251348357527978	0.230409094252386	0.132115300609084	0.0798419918844086	0.115090988644783	0.213030281482445	0.840968507847715	0.579717645533193	11.0435879662788
2008203	12	1.60791266120426	0.590497355972312	0.108584407501969	0.0544605668344637	0.116349600456616	1.21684565021906	0.579761664279112	1.40080307615206	0.777399998417479	0.395495322878108	0.243176280845692	0.263709131183449	0.121029657382896	0.0720706052374209	0.107840763808212	0.400388856767978	0.815520109924047	0.50358193549124	11.1536630618003
2008203	13	1.58114314165508	0.502620737530513	0.0979117066856246	0.0523412984198439	0.0972374868145993	0.438123921040122	0.640358689918382	1.44008300005561	0.726430338148106	0.405886318642463	0.227243814075759	0.353195511455262	0.110948760828836	0.0612065439919009	0.098788696639129	0.570659989149382	0.854527031409551	0.463232373074361	3.79048724700671
2008203	14	1.49164101218393	0.792196030787083	0.097909480009684	0.115856383374087	0.100174874910559	0.406138883801048	0.618715145133107	1.47900648972884	0.682819524151219	0.437653389066556	0.23471770250302	0.463710436344152	0.103606670566923	0.0481980559129371	0.0918118445833455	0.706923359879594	0.965160482927589	0.466379499652898	2.3014055971545
2008203	15	1.28307843510211	1.20506095549201	0.0976278001651356	0.161522987312866	0.122055602695189	0.390280679393361	0.577439310007665	1.44188133409585	0.631360372913053	0.44202160338955	0.249549256159762	0.548700764222579	0.0977579634765295	0.0408676906147437	0.0874413988035239	0.634660450054089	1.06179694078855	0.519850720726865	5.57837623869275
2008203	16	0.774775676662298	1.40828041093298	0.0963365981532569	0.12815076275253	0.15852718271429	0.189805941385909	0.514083622665269	1.33474805096671	0.600420667434151	0.465443232291426	0.251975655593887	0.595722093549462	0.0913694743100137	0.0426248949937313	0.0838402332881386	0.502378043683241	1.05531152813409	0.569120944607324	10.0975514291628
2008203	17	0.695644437641309	1.47432071012937	0.0962122087601508	0.127158307210791	0.187206103052739	0.0453132151086178	0.450901316159582	1.12852174746808	0.555649169343289	0.522416489334223	0.2596590101413	0.620627994013877	0.0859915204803204	0.0545735013536265	0.0806430515239785	0.348043542985377	0.960543924775959	0.599432461525352	10.5572823901087
2008203	18	0.681472694246277	1.33919559144013	0.0968031316988711	0.230486066041949	0.199126707288545	0.0773008555206915	0.393688000473345	0.969898698507954	0.503459231087909	0.507385245913887	0.293615662605977	0.616560359555272	0.0846802165124661	0.0665698907419501	0.0817717960301624	0.268324880139662	0.904817400574663	0.657748678966015	9.98867455499364
2008203	19	0.686393673375817	0.758996231340411	0.0951689497165962	0.360594699697199	0.192605221192643	0.305075618941593	0.296260465269794	0.905032301663129	0.429514982824897	0.453267350456887	0.253111588192739	0.676149575601714	0.0852544331001636	0.0620756205332692	0.078754853855737	0.249638693213678	0.890000587574612	0.725461353121999	9.19498698051013
2008203	20	0.777917425397134	0.260382084385163	0.0810828378174614	0.431569708740888	0.190553009110375	0.51261401152494	0.167444104695603	0.853880300900465	0.367909434048761	0.346399153544264	0.199385850746945	0.715637677335809	0.0867469562289703	0.0658001034051392	0.0744971866585624	0.255723834789769	0.869425101462564	0.747110512628733	8.01491816203613
2008203	21	0.904967358585506	0.252422080478088	0.0689439789882642	0.412382474953298	0.192776494214225	0.464952222969013	0.146209378482967	0.740028050237713	0.32846609056459	0.294296341513658	0.16167999792952	0.784903833501695	0.0862238772036902	0.0809248872628635	0.0746690166096175	0.233107604268074	0.810261556371095	0.700405927970726	7.7215893479106
2008203	22	1.07124801099444	0.437882633549993	0.0637164839181096	0.354987650382424	0.213345178069903	0.411830504724993	0.139968843998985	0.640557057351768	0.314725784108804	0.327458310517149	0.147984156601715	0.901564599873707	0.0831547315209188	0.107465941956616	0.0741093768421107	0.156811310836343	0.727031322952822	0.614200977190832	7.47955614214247
2008203	23	1.11394271613762	0.497942880638746	0.0620349258209984	0.241190397199837	0.261902709136195	0.262145549853546	0.148179670225442	0.610503366896965	0.326372161152365	0.483580260698609	0.139608547457352	0.953057130617872	0.0767516974568383	0.142115655485517	0.0738859291966336	0.0571090362101229	0.658108445048164	0.513495582549157	6.94740809706333
2008204	0	1.6000225237654	0.502659979807605	0.0621422831083169	0.22673243676682	0.371591506668983	0.00648811795413548	0.163137644894199	0.611376513538282	0.363553357027458	1.28077848433313	0.102370254596281	0.955794916425329	0.0723469153428118	0.165024613225131	0.0737626829981289	0.0280621748109684	0.60754617479657	0.399585752986775	6.58558069566604
2008204	1	2.74006995265931	0.536259546216828	0.06666538037804	0.232595978814451	0.393197206446643	0.0483821541151507	0.168099145407668	0.633105405774259	0.408261017233145	3.21879314091167	0.0949473642309971	0.900187847743085	0.070421963753365	0.166806247012404	0.0727010172904648	0.0232420526403077	0.559213222815942	0.330337274760645	6.07457184129868
2008204	2	5.23008014764122	0.534831389953486	0.0744647333959078	0.24283549217141	0.370714586445015	0.203552594714319	0.181338554371596	0.6622616932691	0.414187496929874	4.2885870414816	0.0849994536402566	0.821930991598054	0.0680802948236792	0.157191063275169	0.0709828792092541	0.0241716298836104	0.512747651402644	0.284575257456036	5.67205488872833
2008204	3	8.48881532553533	0.494269128828863	0.0780977430937684	0.238751876858273	0.3561033163731	0.309456001471049	0.271928541174028	0.678928935772389	0.391079216882214	5.47395182128098	0.073624686674173	0.751700145741459	0.066800037568214	0.14957430799358	0.069451340206577	0.0306163433062309	0.461640767032318	0.266896473506487	5.25173608915874
2008204	4	8.6213574539299	0.475717016385657	0.0785313873994997	0.212911740912165	0.351316625991462	0.248585661420895	1.00943076447258	0.668302082977835	0.354066324971765	5.35455256682133	0.067483993340767	0.651460254426883	0.0730326776147016	0.143815923808079	0.0674488896270538	0.0354268666883061	0.405201554081742	0.329112386890267	4.30990831447259
2008204	5	8.39570441628907	0.432834657723999	0.0958833287547755	0.180483859382117	0.383028946172267	0.27249093936655	3.03956955570371	0.660429196155464	0.31078053574242	5.60152905301001	0.0696374685265867	0.54651446550093	0.108706766219723	0.151738318868364	0.0656895500142775	0.0377876136817191	0.333373930776036	0.297261110047258	3.39139164858776
2008204	6	7.89299206855574	0.365307243432744	0.112942260820778	0.135268699267566	0.445577311448598	0.252898979371197	2.81389371735593	0.673848934443836	0.291169677527586	5.5630882460608	0.0739481144319473	0.507265004718384	0.300089074755761	0.129339281965715	0.0637087249847336	0.0360779035331313	0.236341544754138	0.292705705708487	3.39899662534006
2008204	7	7.11571548665963	0.340980108561098	0.141677433221324	0.422733101245302	0.530828956926893	0.222243913701695	2.79530723285503	0.694604253864946	0.294312505759364	5.65484833001923	0.0743494255669126	0.480805161508108	0.487013851338559	0.13210871008272	0.0848193913988115	0.0328108270829537	0.188482950071075	0.342250018953736	3.45969493955273
2008204	8	6.81479465613805	0.322111388896639	0.160540999169726	0.521311286929324	0.628993786158447	0.249501381257035	2.44032697819189	0.793305550437653	0.322918582364848	5.22786105730058	0.0600989483481445	0.440499900491781	0.225763102984065	0.13780804777478	0.176788476172258	0.0267506432546347	0.195530251089529	0.324770461421465	3.09104084689359
2008204	9	6.45617880298275	0.298125184143893	0.18303118598644	0.39435955773606	0.676591569865792	0.295811267342796	2.30069128714719	0.973679628198744	0.358984239642748	4.99383601175534	0.0502759869450398	0.39200546071645	0.158764567866252	0.105478669145225	0.276038780825975	0.0197357283667422	0.163269095009548	0.322120625317319	1.93947448202158
2008204	10	6.2134453755792	0.265858941789546	0.215477723296464	0.286785626162969	0.67029631290174	0.386888622187504	2.20320047382843	1.52077099540813	0.437131816988827	4.70798130889568	0.0732843319726232	0.385052570816971	0.124763783911062	0.0794254977225754	0.289011001416034	0.0162626622217952	0.165150809751263	0.331611407895185	1.05719116264841
2008204	11	6.17528207618671	0.228481982627922	0.379317668659174	0.25061914511591	0.636319974803491	0.434833797945179	2.24080820860451	2.4055765636944	0.536507529596083	4.01861274503911	0.149270476082796	0.384766020949498	0.102717240772355	0.0603314451230874	0.277298094866586	0.0109020393139813	0.166551546625055	0.360015398439148	0.806780939980071
2008204	12	5.79187273435828	0.253565557583445	0.342922482245507	0.256170685553229	0.596265925144532	0.381051788854771	1.96625928126289	2.83931150574237	0.633428222987521	3.68336460566866	0.250420096745207	0.388596522600503	0.08801527636058	0.0450146459982336	0.259036970071383	0.00739350734032044	0.168773934160793	0.410927072727588	0.62044449607071
2008204	13	5.58319114214831	0.57798644484039	0.318298518826814	0.282705110727236	0.574184265668982	0.291677179606206	1.65702361337584	2.86114458943714	0.742777314767381	2.92969823687742	0.340449659400074	0.400244172580974	0.0782808329305346	0.0355441361538773	0.235128160048939	0.00711071146195065	0.171122859758574	0.506198722639195	0.440893653185415
2008204	14	3.26031493719044	1.08326267875664	0.298624744732697	0.2700298950343	0.569717007750903	0.246929164658536	1.55706379509113	2.83682815875181	0.863281944910466	2.40822595093166	0.374762591054686	0.393208139120668	0.0733095538977094	0.0315906067267866	0.207320683580067	0.0101993626956603	0.176012524498206	0.63010916532953	0.354758831966858
2008204	15	2.0476077257077	1.26048696916227	0.279033851785927	0.239784794488059	0.643488547220263	0.218535901345351	1.5407322066648	2.64423969981994	0.985354761371867	1.86202284082376	0.374157103094585	0.395968127769437	0.0757849593556822	0.0290700056709258	0.175221028178013	0.0202195761778601	0.178237180665008	0.740868979678741	0.497015179960154
2008204	16	1.87506398776681	1.24148413400338	0.261521300790744	0.209609319922484	1.0929428101375	0.178354701476391	1.43204597554432	2.34254384773822	1.06259408219115	1.5397580303021	0.326078875684872	0.379495663905766	0.0905150621219781	0.0266811548461281	0.140698583120649	0.0364703649412911	0.188522285908899	0.809723095830607	0.809110814913686
2008204	17	2.2080892075221	1.19341735174574	0.255738365736407	0.188809337857328	1.71018492413877	0.149748647013911	1.4063694611037	1.98876610607947	1.06098579195571	1.39055726079147	0.275325997241788	0.32321710183393	0.102077940190769	0.0240473103056862	0.115674802258273	0.0420617671084034	0.196428453239311	0.842742238173798	0.925083437157511
2008204	18	2.76942283536281	1.08553179995671	0.26061851759661	0.155877964195148	1.9328781547084	0.13132330373625	1.43717364384473	1.70056609962747	0.940081962809596	1.45075736867621	0.201777486917081	0.246749078017403	0.100212775840357	0.0219130060875267	0.0956478229966058	0.0437231388893855	0.196098288421481	0.845983075820891	1.00019847138135
2008204	19	2.64692698722216	0.904763077717514	0.281813063079084	0.124742021893182	1.78484522383668	0.0928304364821978	1.31706407880201	1.40779575634183	0.843096612893223	1.69842901503597	0.127444700457402	0.152649212045095	0.0870653502298955	0.0207614090861725	0.0575462278845026	0.0350268578968088	0.190301939574423	0.846928785398971	1.08269928935863
2008204	20	2.26862775871448	0.697409050098453	0.298327752760036	0.13840866085286	1.5981078788935	0.0861260702379392	1.15340058467507	1.10386754787309	0.977398700071755	1.72903259173437	0.112123059286644	0.123858060613902	0.0817622837954393	0.0206733282342593	0.0551235313696363	0.0380930288147705	0.187249022177297	0.877619376073852	1.04320842126645
2008204	21	1.78339165655106	0.539462358515062	0.304300578862141	0.260449161762991	1.52878117786369	0.110136592597716	1.22093395247797	0.990195058768672	1.45124134101352	1.65188805285398	0.118801053225784	0.132928172360423	0.0808422772059445	0.0217656552094865	0.0548769926128347	0.102876845626645	0.183780857158819	0.929017803961777	0.968015598784671
2008204	22	1.65320419446887	0.441920816497771	0.315759050684427	0.442332950869874	1.34619487634835	0.239580168868841	1.37492051736792	1.03193224046232	1.90765805313566	1.70800800289376	0.13426296298455	0.154262915945677	0.0995421713898213	0.0227924667195639	0.0532488810085934	0.100231043125313	0.190775901341064	1.12327048996625	0.831564264907188
2008204	23	1.66683326934521	0.490203337673836	0.320302832581879	0.498889864676094	1.13998926576783	0.417099075293109	1.43137913930233	1.03133049684973	2.11322971774132	2.02152654145386	0.145171793227691	0.141884854051351	0.127895862806422	0.022870724874473	0.0519355715400964	0.160789384629719	0.198792651659827	1.57813351246755	0.661625047086125
2008205	0	1.73271487435126	0.540874548873634	0.325218624846065	0.491460623778717	1.02869754515084	0.483343053859906	1.39236253836013	1.08744770987862	2.05936136217265	3.54296828959607	0.184271993250631	0.12396731399936	0.178620644475488	0.0216695238049075	0.0514710023938021	0.163166640914201	0.204505154455441	1.91076703461969	0.551955405192462
2008205	1	1.79928385268048	0.581621253932514	0.330952651120213	0.480333798582396	0.90501792493149	0.480794109078017	1.77653843246052	1.23751808265601	1.86478099112388	4.62288413370133	0.285946815829978	0.10287760085789	0.223466304375134	0.0195948633763537	0.0513391003400687	0.149054048588815	0.200014356916987	2.02050842983825	0.509779799010363
2008205	2	1.95816102628867	0.704843393300115	0.338328527689001	0.467096270343266	0.82201484357312	0.462720868233533	2.69840151806056	1.45816450881388	1.79218036877002	5.23411857032654	0.366885324173297	0.105758233251673	0.193347783706967	0.0175300068811097	0.0498756055453221	0.13544568373868	0.185979010986184	1.97430820794508	0.484250429480524
2008205	3	2.4718996073001	0.957970582014018	0.348326781647187	0.450835710381555	0.747398145026303	0.448336794234103	3.32637556560102	1.67734305551592	1.80236886666327	5.47856523906898	0.406377506182029	0.117753302647243	0.193150334483997	0.016129762674101	0.0470284930332585	0.129032906166731	0.179606974420628	2.01736090824761	0.461149840261173
2008205	4	3.66858613279803	1.23123755473053	0.359553930740268	0.428249687773208	0.706696501857696	0.436557370500889	3.6581086753861	1.89461618388406	2.09004209933701	5.38591895619003	0.319305242741237	0.13133804876287	0.207427483037117	0.0156234421368336	0.0428368000587347	0.139471327134535	0.179527306491959	2.23732767790535	0.439417925591499
2008205	5	4.92174289642349	1.37808303029832	0.370935781482542	0.397920279930705	0.693334682045973	0.423813600555211	3.43970453814067	2.14384599959232	2.51597009310232	4.77997476618946	0.189029795899553	0.133769626580219	0.22364897717042	0.0156959393493193	0.040045690072006	0.186487806040211	0.184123895776456	2.66175652318286	0.422270327410056
2008205	6	5.33923376924709	1.62470439038233	0.536576518334287	0.590509500243712	0.709169801743367	0.412165094395869	3.10476159819639	2.44093300799496	2.94732028721808	4.24778994399082	0.144864360248485	0.14037273243269	0.317876510954566	0.0484651829632796	0.038600137081959	0.206309428931697	0.192490559594842	2.9929752031441	0.414720435282945
2008205	7	5.26056388647499	2.03128276350363	0.549692159044279	0.833835134359852	0.732245167355555	0.404660040103176	2.72195032233038	2.56755744698881	3.12508687388315	3.64014578602596	0.130107954668587	0.138144173903772	0.361424636821014	0.05920033266802	0.0379876328642543	0.239025902563608	0.234897744915193	3.15178040654035	0.470413703962243
2008205	8	4.75370199936022	1.4849666372364	0.592890638716116	0.912324706874055	0.778066730338925	0.407807415838101	2.38158227415524	2.61661795255166	3.09177050760063	3.16617500739157	0.140908588972176	0.124537123532134	0.437631585672146	0.0401869459698967	0.0367287350335905	0.235782548366508	0.344412891623934	3.13881486959426	0.835560299274977
2008205	9	4.13446821531631	1.04461154911334	0.530626693679284	0.751684930121735	0.835692570343565	0.382669444162159	1.91450510303468	2.68182999811641	3.01169298688074	3.07284152303691	0.202315071360997	0.118136348339844	0.324171926034241	0.0471681262621069	0.0357976474934676	0.206725511992806	0.337392321010331	3.05625214362068	1.48133377186284
2008205	10	3.69341897397593	0.95670247450479	0.445796015573213	0.540803216821717	0.891457777567574	0.345772124589428	1.75733744141785	2.70877722903306	2.84330124817866	3.1451404807237	0.295553842349062	0.135187665484875	0.244550667171861	0.126309275750242	0.0351766901006416	0.185385698345614	0.297562636529656	2.90832285838812	1.52429849471134
2008205	11	3.37499061336831	0.893071891420092	0.385587366976285	0.421035060163546	0.937747425227977	0.326155370303872	1.59852784287325	2.71562011680878	2.58486672417855	3.46445791875908	0.319598284643706	0.140101821247618	0.224732441894041	0.10620535366714	0.0359494087415545	0.151918370469465	0.246162332378502	2.75008793663931	1.23738461271499
2008205	12	3.18587337043755	0.80858500143672	0.335422319164312	0.348998798600516	0.987059311850148	0.31403528333118	1.44384677105919	2.76146726283872	2.2608915207736	3.6026288416213	0.329609023750405	0.131320898705576	0.235994991549374	0.0824014738763724	0.037107380840083	0.11621083128549	0.213752377691267	2.63504607671099	0.975013143846328
2008205	13	3.04336886557632	0.735572237131551	0.289731778862602	0.306496679255197	1.05218530723258	0.300718740640055	1.3204528314655	2.70832289907179	1.89193386678824	3.59303289329167	0.367233210293879	0.114279428253802	0.265811369757909	0.0658430791670142	0.035435837544677	0.100470329670612	0.18288571810052	2.53728395209826	0.830528320188976
2008205	14	2.94446727300232	0.68274762926076	0.254272778438836	0.273721252513477	1.11654440708904	0.291337349682125	1.43123104454291	2.62383088909983	1.58385867068026	3.51105135015623	0.572436898976007	0.0998356093681772	0.305218761820048	0.0537739721136168	0.0333761078311567	0.103668125910058	0.186031467074547	2.37599465807247	0.739282825510288
2008205	15	2.87238165979373	0.630589490164796	0.223058983828167	0.251522470525125	1.18789317690929	0.281709869650919	1.51361560028189	2.50148616605871	1.36199268238225	3.3924448792391	0.824642566330938	0.0907244274059126	0.364727903517214	0.0444629268151734	0.0322028163769951	0.0999163121407126	0.184521259712602	2.20453202317863	0.687712672130932
2008205	16	2.81758889104892	0.584929027904461	0.193980288870337	0.250761364066708	1.25882693910793	0.268454559379669	1.51574000217917	2.40505765213385	1.21974393369284	3.2123343537376	0.844149356660215	0.0781741265805399	0.439358304760034	0.03627118221104	0.032218850966998	0.0955415649941072	0.181977908503159	2.03762880573756	0.636875792791203
2008205	17	2.78267869390769	0.55477656257596	0.170280778195987	0.253382219448092	1.32932665051203	0.254709240565917	1.45146707524109	2.39013524697408	1.14195052242201	3.00731048115701	0.857188675416465	0.0674946387491937	0.56120297992996	0.0315906357226132	0.0324584300479886	0.0870679216231111	0.17953190489451	1.8955050285931	0.583239530496229
2008205	18	2.75408096431455	0.552121469104183	0.155612422418848	0.282751281743656	1.37447148036042	0.232162787574563	1.4226326703765	2.42120579314005	1.10489430809299	2.84686584393373	0.801500546284257	0.0683472900514054	0.757168486728886	0.027918491081338	0.0338058753633525	0.0793046586096774	0.176314831965907	1.84073043976996	0.547694125468494
2008205	19	2.73031969732095	0.602037816922374	0.1488552484452	0.34469247107778	1.41006998081048	0.206173575639462	1.1372003456374	2.35104784020573	1.09716374908997	2.51338383059788	0.763959849063156	0.0701047750652073	0.961581992443658	0.0263537774620037	0.0341181137724601	0.0655034921214384	0.159663240676472	1.81061249616336	0.533509417714529
2008205	20	2.71161331124194	0.629434709063195	0.162628932002949	0.354538543358055	1.33454827950455	0.20077571823559	0.981599282708714	2.05693642645127	1.10312123751004	2.59422756206979	0.730195646119767	0.0721904737655806	1.18313850085874	0.0259896749654394	0.0324533692882537	0.0593540754251395	0.126143580746838	1.84379307685689	0.542697694954074
2008205	21	2.71493726388527	0.715270813807374	0.188404896713104	0.351456949371495	1.07877859718405	0.182182551393654	0.959766485639706	1.82618631264887	1.10780713519551	2.64841608043967	0.732828976222706	0.0735074542814441	1.41438598615033	0.0259901119934763	0.0285971207091964	0.0563976498311398	0.106638736864694	1.9373195086126	0.632444081832906
2008205	22	2.73753111798954	0.965873144600123	0.193217895874121	0.393792695572866	0.924770019185725	0.174237794577446	0.98067263519791	1.60970780226018	1.09762942845416	2.58175883689658	0.745885172532624	0.0735262550358445	1.57809454748921	0.0260897894061421	0.0225999744794927	0.0556970216374024	0.104078001881669	2.06739824984682	0.769211355903426
2008205	23	2.78610004161199	1.0447747459248	0.192251884854138	0.467393020427719	0.833560385139943	0.221206725131764	1.03747976695252	1.5792085185404	1.08263577745895	2.44877925134057	0.76312079357353	0.0736842390794268	1.73661237762542	0.0258455034320906	0.019657394002751	0.0616532885732331	0.110050205539773	2.23189018475314	0.810030212615413
2008206	0	2.88232252481514	1.03449090648558	0.188427232400482	0.554315661259797	0.756237900812886	0.227213148346889	1.03621745342298	1.65576849883334	1.17511147967597	2.33388694774994	0.779089988404256	0.0827279341638576	1.91613341624998	0.025105210391079	0.0199039900309769	0.0706158347385845	0.124746596644924	2.29655345013997	0.86723385062835
2008206	1	2.9896173260114	1.05393384653927	0.185788755862003	0.645417422487901	0.698727782465212	0.210784439708974	1.02143789159491	1.75999826771373	1.33855136800401	2.15543359331332	0.791989838872677	0.0984237804604793	2.0586627393164	0.0240040053229657	0.0204876167392001	0.0816794714685371	0.16961547771641	2.03510359660265	1.09342374307212
2008206	2	2.93524190282842	1.04411561650718	0.192789075436589	0.672790402762982	0.669801163654524	0.17794530288127	1.00487187108957	1.80399793773834	1.3627698850058	1.91545873343041	0.805250816565633	0.246681804466931	2.16850968088567	0.0228647573567318	0.020760355382142	0.0879759701346475	0.266089247843943	1.72748184999055	1.17021446437396
2008206	3	2.7597963216244	1.00480228968537	0.188696419152492	0.69577487488465	0.606828817404953	0.147993636932532	0.981010478132803	1.81270344692885	1.3242116310746	1.67796987815882	0.786352549521781	0.478939809346846	2.26999897861532	0.0227504960514206	0.0202597667527635	0.0858917944056933	0.413644783269538	1.35003548584565	1.11341661260777
2008206	4	2.5877721351122	0.96471570714899	0.192130270731179	0.702535911488342	0.494568795096038	0.12853170220418	0.946941018888342	1.77805227266615	1.20348429279789	1.49151540067411	0.766513600717735	0.486054087048074	2.33640540475028	0.0238794735802696	0.0203832061255561	0.0826462439779286	0.464938573528943	0.999490326693709	0.884346602413959
2008206	5	2.36034454495366	0.990856905661133	0.188815872976778	0.543996470224295	0.421080157821627	0.102489960635268	0.911933694858644	1.82522828575025	0.979084500189449	1.36651699461253	0.728521030421284	0.502836589046366	2.44499869325492	0.0250249600746241	0.0189345473338332	0.0847730802134142	0.470159495174882	0.769879320048945	0.705457180693183
2008206	6	2.11850640828369	1.04190962578404	0.183724441770808	0.261733260898541	0.360952967214069	0.0918441090543769	1.25337861430946	1.75305016361512	0.722352153244176	2.15721232874587	0.687599433684529	0.545876424211147	2.23314613046767	0.0390245727286556	0.0166363322116128	0.0861724447835441	0.486672102627584	0.657735207494041	0.743841618591158
2008206	7	1.89071738635984	0.779736256037008	0.14852877339341	0.152666215825241	0.321371807766109	0.0960371519356433	1.06373639344087	1.55677884707639	0.498633932913148	1.70532308357378	0.657266680967946	0.485986940135415	1.73896951480828	0.0755734582053615	0.0152272872727783	0.0851648761902798	0.542229084237351	0.598918254660013	0.621612088550007
2008206	8	1.66261008959449	0.522687423861678	0.103640376605367	0.112951881237409	0.307784540448138	0.0953159114516713	1.02594250358634	1.27595585049485	0.41035959735908	1.06106693530317	0.674778118259254	0.370124439564142	1.09261766452245	0.117476000761219	0.0147367921078808	0.0774633011689013	0.793730322856003	0.510740610656744	0.546706350705151
2008206	9	1.49382721585485	0.345395090385413	0.0833849706754359	0.105336713892571	0.280971332114511	0.099481971867203	0.851275286694062	1.09397995605255	0.386174434171029	0.847663596898178	0.746902711568008	0.293794078785202	0.78464414748073	0.112192341227579	0.0149810292923061	0.0721859058861796	0.901578426191515	0.536367436329409	0.517263248112302
2008206	10	1.40013775816702	0.244758425329823	0.075899866427512	0.105547186301589	0.25167866464796	0.105372937231925	0.67147387407408	0.826183411495745	0.385983582159414	0.685608349961848	0.831778972413665	0.212381792930537	0.630264299146171	0.112144632668435	0.0151393681781623	0.0654474725698577	0.950490196071649	0.658971602702796	0.489294762493668
2008206	11	1.31047488070004	0.17992758330609	0.0687793815470009	0.12321094916661	0.26033045836389	0.112186891319926	0.53462715435279	0.615937821818729	0.39597980172686	0.564073383891733	0.873539047764068	0.153133462695545	0.547598688969879	0.114651302449124	0.0146142401753896	0.0561329692885474	1.08380114182562	0.806056066351161	0.444721720657763
2008206	12	1.22593444900671	0.134453166871319	0.0580608613461294	0.165614341297488	0.377509928048005	0.109170771631005	0.397275045973814	0.442789556598687	0.41468868312045	0.533938113005165	0.860660242362869	0.118068285343844	0.484493398654442	0.117592121846162	0.0103231243337318	0.0475731680102995	1.11655304268222	0.973283758563279	0.402673093249956
2008206	13	1.15037261036558	0.103552018488165	0.0475081726309645	0.208558290167568	0.589139371364272	0.100272145134633	0.319326528631306	0.351162744442387	0.436268753124335	0.509200689718956	0.803974829763709	0.0935999691709764	0.446680727602401	0.124800474636369	0.00637792204285087	0.0431666479765982	1.30061038528378	1.13105297690124	0.341544544915106
2008206	14	1.0647274565699	0.0944165514807897	0.0440972881840021	0.296133960716415	0.859671644652769	0.0911602543833037	0.291224885330424	0.329427039274191	0.462741773058211	0.455976529883596	0.736794979727965	0.0806842750323623	0.423269529935255	0.129394217397657	0.00623084705928911	0.0420164508901784	1.68197461688427	1.22870027405084	0.302697451314965
2008206	15	0.920816846511433	0.0997947126604692	0.044641278878661	0.434294153150777	1.32479127096301	0.0855600220826511	0.281783807267799	0.373056715398824	0.490169124019118	0.352853680491215	0.657918793843413	0.0784321520810602	0.40520559325933	0.133443589921614	0.00551347446028057	0.0395813788445047	2.04053136459035	1.23093959333031	0.283951915031235
2008206	16	0.683307106881038	0.112942259380214	0.0494932459766858	0.548328497755484	1.60382709854934	0.0829755725959598	0.284599008559539	0.47386074647893	0.519929550198498	0.27731082955724	0.583603087078241	0.0772306054182272	0.411688875756097	0.136296377774994	0.00553687737498283	0.0352253264818207	2.35233507368714	1.19516703553437	0.271434471147444
2008206	17	0.517367428620879	0.141753491850999	0.0546069487732523	0.612885181898166	1.96013927330533	0.0792039432338307	0.276041375180392	0.804091975437703	0.518367077904089	0.251575531086507	0.538596842102772	0.0857864308945099	0.445089765653765	0.137370563791747	0.00630986042425685	0.0290804482862283	2.54694096572426	1.15127413166896	0.249939180770314
2008206	18	0.461292410910014	0.23145162199673	0.0581327593512284	0.630092362291947	2.19864161318228	0.0828871946320176	0.256955061371177	1.12875265918196	0.487163367030093	0.247848048521529	0.53103178334276	0.12857981964991	0.437886557118657	0.134905574904644	0.00739611628482439	0.0191284858418448	2.59510135331856	1.1814634760186	0.186246483930258
2008206	19	0.461149147589575	0.346760565256536	0.0611935713038582	0.694906740737712	2.2969278549619	0.0982620578577955	0.279703624435849	1.32819301504226	0.352114222041621	0.253334299457267	0.536009299875008	0.186476374352588	0.502738277796157	0.127808199915618	0.0085456974197375	0.0101826214531183	2.37508538457155	1.03459320014352	0.136451961076952
2008206	20	0.585961964885901	0.459397905989724	0.0643776346786743	0.668234991980224	2.28269899790821	0.109276651411264	0.375287822393833	1.37312155322064	0.215773786049349	0.244182896857798	0.563231844158192	0.257368305434211	0.528393358322501	0.12281256938588	0.00973038887614933	0.00897585552562204	1.96640676682312	0.933574199090623	0.111058177374308
2008206	21	0.89161165465087	0.51146709439994	0.0655412240832839	0.520280453638126	2.32204828223351	0.110915505156031	0.531341389595536	1.28171349489418	0.171468769471136	0.252946742651521	0.35701775191608	0.305548541081589	0.566095673749202	0.118041407216215	0.0104219588028721	0.00991098160873699	1.7019889152378	0.751305277687026	0.101695587708821
2008206	22	1.05091148496906	0.545250204987841	0.0649971904337617	0.467974763745244	2.5635155069105	0.109790737995109	0.621063685478105	1.3031133525418	0.162446525650886	0.282259426856691	0.278952828198535	0.30288220281097	0.532306087453439	0.112987603567748	0.0103674223795571	0.0226223539127854	1.61581761455677	0.565030393562776	0.103863450878744
2008206	23	0.997635626303687	0.553991800986428	0.0638234894245642	0.451162405042105	2.69004298119309	0.112592047601059	0.614981743858926	1.40755271646463	0.165695584712892	0.351658590836198	0.27839820924382	0.277761812236019	0.565087589706287	0.107510728327458	0.00980832690974014	0.0273694391153044	1.61742718417359	0.525972027465387	0.0991091740638016
2008207	0	0.986011729299394	0.485298609371426	0.0623622063141621	0.455091368313957	2.90046262766608	0.114088521709837	0.496136187421502	1.50887644550021	0.203782846473852	0.476723200040821	0.294376587588318	0.264152267916595	0.592905653640147	0.10185352611424	0.00896605923361636	0.029911743709111	1.6657146720872	0.42874747066	0.0912010476707363
2008207	1	1.01333548496863	0.386482585351439	0.0608398218231627	0.479933952117449	2.91935417175112	0.107124103594335	0.246108222435344	1.6364687709189	0.233374302883261	0.559085418985491	0.304357152701928	0.255405047317836	0.667158412717831	0.0969927833962705	0.00730285179807767	0.0295586061580939	1.71786358978684	0.374915215443845	0.079596506936517
2008207	2	1.02293389046697	0.37066353332509	0.0595188034948307	0.480981853364749	2.87558936670637	0.0925841494566855	0.202779291897917	1.7944027304305	0.247554033367089	0.511276602097735	0.313532325204057	0.248362171813701	0.738240330599175	0.0933432699705655	0.00580885294082658	0.0253035830394154	1.76811398777994	0.339645591567136	0.0702125488522174
2008207	3	1.08650413998202	0.37539417536713	0.0585288966687001	0.445011243389273	2.78692784795465	0.0696651320922583	0.223946946546991	1.86363810078531	0.273686695570604	0.278838401494169	0.33180558922999	0.23726323709551	0.773087443039212	0.0902304531320559	0.00495415221117239	0.0262040518087722	1.65447921778916	0.26195155813603	0.0666613779446919
2008207	4	1.11394159734475	0.384227518615677	0.057770678011571	0.403770673116924	2.68861085040208	0.0575633020301046	0.281233045687464	1.9160872907006	0.307085412276698	0.210817982614216	0.360173857044403	0.231560615893014	0.805404743525147	0.0874084528557896	0.00444555091348402	0.0288984553660556	1.56726170467684	0.226967788362783	0.0648930655324917
2008207	5	1.19528144638011	0.393043006386974	0.0572518950286288	0.37632153527319	2.63047351709389	0.064669633483631	0.340323440230818	1.98608829459035	0.365820090887369	0.228826296458335	0.397675401444427	0.219626012965496	0.798417260281793	0.0854680560173753	0.00423850593989414	0.0291200476015562	1.52393762804734	0.232671225863102	0.0680994493363992
2008207	6	1.26179890702275	0.388286026153695	0.0590370888666353	0.359046291146637	2.76363619914506	0.0810566897739619	0.423838206422891	2.08914692059088	0.466036782980377	0.283901431297208	0.425846688027225	0.205858904104427	0.540936667175482	0.0840081583557749	0.00417844299720755	0.0269033951374541	1.58574268708501	0.257673098821502	0.0784753417853096
2008207	7	1.35504954020608	0.360503057822279	0.0581613572845209	0.338099224125675	2.80263233295232	0.102877173581971	0.528027903613304	2.15148790225885	0.514651463195171	0.347505277797125	0.443372136799469	0.196605819599383	0.30154673925208	0.0927874993068295	0.00377754875458223	0.0225467571916822	1.49511560882249	0.295008070438005	0.0869533996715616
2008207	8	1.44113484086314	0.268826481094297	0.0472339400034492	0.31083848696435	2.78489526376328	0.128152154846917	0.644673574079542	2.13459377601714	0.480929285376756	0.429755265561981	0.448785944571691	0.185206989072035	0.28611312858617	0.0811363345033697	0.00238664517876147	0.019582852723839	1.37891073039186	0.322179054898313	0.0893232417532869
2008207	9	1.52895260888237	0.212738061622245	0.039618144091796	0.2203723349031	2.69701734028433	0.142071172882096	0.796232464403233	2.16799748518179	0.424543054483081	0.457202855158702	0.450056742944733	0.165772513664961	0.285154612169867	0.0738801639426993	0.0016725547163278	0.0170470353487863	1.29190686036332	0.308056726687719	0.0814499433654134
2008207	10	1.52659816650307	0.206711232497687	0.0374679165898658	0.172461712242344	2.46397799436244	0.133323012935795	0.779872954427108	2.0039044208154	0.326101886394733	0.479760378120587	0.459813741746196	0.135612951501917	0.24609582885827	0.0623171955191185	0.00140982155989134	0.0119628511525615	1.18186419991601	0.28750602869063	0.0769313814564245
2008207	11	1.413367847213	0.265756197548506	0.0369044600447619	0.13165903838923	2.21272499172529	0.0983693862310885	0.629516259998541	1.80742754444455	0.265761831035917	0.560074068518765	0.437668730619394	0.103292180305157	0.203970161177346	0.0550240140141963	0.00143236757025627	0.00940776831169716	1.17246378441754	0.259517253452293	0.0760057633186019
2008207	12	1.32694393516806	0.341257968388591	0.0355843838632477	0.104646867679802	2.10851938106841	0.0663439847431262	0.466185176007234	1.71580155994079	0.22031165240557	0.520678676229127	0.37014619339869	0.0832272541871444	0.180447309069854	0.0497856129966805	0.00148966252992814	0.00796231827816678	1.24514416254195	0.244458665369525	0.0755509477639442
2008207	13	1.27737470175598	0.363277171110053	0.0342870066046197	0.0871867537565775	1.98766827347311	0.0470907204137359	0.403313704682116	1.62386553332328	0.195425248893244	0.391774961314809	0.377432288963345	0.076249667069706	0.179898706629269	0.0457466917657809	0.00153169559114643	0.00625478017874432	1.33976280746868	0.233719466863991	0.0718698879923667
2008207	14	1.22861282371935	0.312744564006972	0.0332043562639006	0.0861152931705547	1.96438980165528	0.0341182684065284	0.376573252018451	1.64185403108022	0.193396994163766	0.340309520493411	0.434832277873707	0.0751289699778545	0.210605888100364	0.0431779808914963	0.00135188288176732	0.00485917178069487	1.38938731233615	0.232144633398024	0.0715105998902474
2008207	15	1.17176042754664	0.225785370128635	0.0319745438549831	0.121076403001357	2.00861946478593	0.0252401035015944	0.341297916452056	1.74372928425406	0.199664947496482	0.345996087158858	0.49287061999048	0.075001374025402	0.233137553885337	0.0413303274773841	0.00121247066747389	0.00453155283258308	1.30254810710332	0.232440695921229	0.072526050831816
2008207	16	1.25673445176456	0.173843456290375	0.0312826359299207	0.180149887455795	2.18681460938588	0.0198127209180005	0.306471522179066	1.75043357423125	0.208455268494489	0.339124481674067	0.496612028604694	0.0704684443586315	0.23977404032867	0.0396567367092213	0.00130738241671904	0.00488307274770054	1.19994974357613	0.239036292822446	0.0737114786718514
2008207	17	1.29840617114315	0.146926302045259	0.0307371556212974	0.233864075068465	2.26371518234784	0.0165846194116541	0.252204630264833	1.70846403990453	0.211220256414408	0.312465430336472	0.502038992484173	0.0648161860241777	0.259880720165236	0.0384011193123173	0.001506987682272	0.00546912395317179	1.08895878954874	0.239634493258384	0.0742089725764261
2008207	18	1.3628341411973	0.171554800301595	0.0293081746702376	0.28685477012099	2.24731941300743	0.0147173446495913	0.210641711270355	1.6971033704309	0.202705436154564	0.292106612444102	0.433848851704603	0.0609237677643009	0.335584505344764	0.0371330804587318	0.00198070173676817	0.00577355663965989	1.05517773656017	0.217525422021407	0.0747057313588685
2008207	19	1.4817310819665	0.26233825492607	0.0266401463138266	0.270806167956541	2.30193259990243	0.0138820591894111	0.229590766106402	1.83539718522372	0.189229492444787	0.248483291998603	0.346217529195631	0.0588963812322784	0.422313752383581	0.0358817054086099	0.00249775977874706	0.00566826993098998	0.98894700323226	0.186258575983964	0.0722983845554234
2008207	20	1.58472754972962	0.34176464201269	0.024959757427069	0.229080141417466	2.41590955120926	0.0137440247902429	0.294329147257697	1.99868681214688	0.187071206713625	0.219898812808995	0.282474746907314	0.0572130179175806	0.505126827358412	0.0341008495702772	0.00267882373032835	0.00565888152830418	0.929953698176946	0.181280732030473	0.0687261066320207
2008207	21	1.66819212224286	0.349546735785374	0.0239669727363173	0.185689890576099	2.46980929244954	0.0152820465226015	0.316398851355823	2.13465628576969	0.194352474101508	0.260407051272218	0.2751214128973	0.0545208824447351	0.515092550544807	0.0327027789270558	0.00343908202094559	0.00747883897474037	0.865310920888211	0.186873504450745	0.0640010715729723
2008207	22	1.74252374193419	0.341456679912873	0.0235105217312649	0.161786792998841	2.54826645046062	0.0171781810368635	0.29423897531286	2.21281842295808	0.220297190125848	0.292888425397024	0.28985065078444	0.0520692387713231	0.529481902149535	0.0317152384459006	0.00423560190648887	0.0106422065857391	0.901790287411676	0.210377232781426	0.0565786782568523
2008207	23	1.8315493156761	0.314199059071474	0.023450301818493	0.156644530345181	2.5063688440421	0.0179123574192142	0.247182133521985	2.34901149274529	0.264026186449025	0.303545945124704	0.290752976005059	0.0509756796451758	0.567379664190805	0.0312065278608153	0.00534865380660155	0.0121868291586077	0.86862415371381	0.254132006234088	0.0433591960429364
2008208	0	1.90230101808164	0.225812224125033	0.0236072352915828	0.153949241587561	2.32165389899271	0.0193626943736512	0.242951277647936	2.47963095493904	0.317555164597906	0.283548907245355	0.284332567636925	0.0501861912233962	0.626674276689485	0.0311071518839283	0.00685805618711693	0.0128983338521105	0.761375326224029	0.29995392336668	0.0317362073076015
2008208	1	1.93892405481511	0.158780053984884	0.0237460110490334	0.141382048481822	2.08068188748558	0.02163962097925	0.283007738751754	2.38325006770097	0.36099550550555	0.249369566938448	0.287970799028339	0.0477824537649814	0.696419638119644	0.0312813265500256	0.00907067805068761	0.0133224630967407	0.697030188761257	0.329878065555348	0.0253171571511175
2008208	2	1.94957305431411	0.137543633844006	0.0241069717389489	0.1201426229027	1.89964137940301	0.0239689173435802	0.365796729265824	2.2762566408992	0.416064903164766	0.252001679648192	0.302408214577875	0.0465066056399229	0.757018537540827	0.0315922123873975	0.012197057537957	0.0135589058281954	0.70116070846331	0.359687395249765	0.0232651348447692
2008208	3	2.0073816758621	0.134207481022079	0.0248386356571572	0.103173403002569	1.8646352518234	0.0254534278370203	0.470358592862274	2.08754632375991	0.480634257289414	0.286208787957456	0.32296118041911	0.0475768148109499	0.739321562879451	0.0319893638124843	0.0165906736949169	0.0136176608206703	0.718881615227823	0.407572763845981	0.0225865803171241
2008208	4	1.93733964502035	0.133419286994302	0.0256029754506439	0.09127327940379	1.90634739690981	0.0261289407086082	0.546977557237141	1.90074968592063	0.55673878463361	0.352965614792135	0.35179478085569	0.0520037004403557	0.589877520513328	0.032416110564552	0.020829742924297	0.0134554899203187	0.724897535180142	0.464195486120114	0.0222788841441823
2008208	5	1.84749321432243	0.131125164202783	0.0263009760864871	0.082750109390519	1.90851321342434	0.0260447092202752	0.62889548067216	1.82639144420483	0.619595279385865	0.484713251108551	0.374956463720271	0.058924653193388	0.444017021182704	0.0326510007282244	0.022723080236558	0.0129106793934125	0.740374131438392	0.486338899984894	0.0224043011433061
2008208	6	1.73608743481287	0.12498462246092	0.0288309917711646	0.0726888948401909	1.76664723221577	0.0248628599678468	0.749679785732329	1.79231796406292	0.616311418698388	0.540955698281522	0.377038213041055	0.0700211966669033	0.398623582643189	0.0690685492119472	0.0233838075871246	0.0116481552973626	0.783956659218657	0.471943002940553	0.022389125121139
2008208	7	1.57933661476966	0.106619663942607	0.0380227152976785	0.0674207904507943	1.65230283785153	0.0227615325542201	0.860251108814882	1.71545533543772	0.569277384479373	0.54487146765263	0.369316018463092	0.0827208977036758	0.405697288833713	0.124508331389051	0.023050967426931	0.0106634068385403	0.70877417041219	0.407978654374998	0.0233640821956889
2008208	8	1.43207987776264	0.0812496355136462	0.0362590405630841	0.0595187305227359	1.51363392763223	0.0210885325906391	0.896608949182379	1.68777372537738	0.535136180613247	0.706001574527167	0.360255741366613	0.092235507230492	0.450680588800075	0.10413640194613	0.0186559085942414	0.00792937424834589	0.641713870440041	0.37685801055234	0.0239536546798614
2008208	9	1.24988831551329	0.0631609298421329	0.0326217970873279	0.0479836240501452	1.26801051047637	0.0203034220554447	0.870940687529637	1.53790633199964	0.517056444918933	0.786124353313567	0.349587303608214	0.0856865582562194	0.47463928767647	0.0876773059478502	0.0174235699625628	0.00451758991865587	0.588115235901992	0.329664312149712	0.0249922002679091
2008208	10	1.01411758920755	0.0439768413674687	0.03101183938221	0.042043626418516	1.19701821495555	0.0175559007199419	0.773172664341228	1.27135391926405	0.467653681532621	0.60929040401283	0.340425271766725	0.069076007321917	0.457813426837836	0.0780678395498919	0.0183402771705689	0.00306754610276495	0.535954103660755	0.276853179502906	0.0259480388971251
2008208	11	0.903428646937798	0.0357810381165278	0.0298684662525649	0.0385129485596642	1.1093517907064	0.0176261033963951	0.641233469898348	1.18832911919538	0.430127925965816	0.495912539901283	0.328929073432239	0.0644187118001158	0.41846878950253	0.0703150051556202	0.0202159641196538	0.00289133809592154	0.511311139830783	0.258372080652753	0.0250705153403261
2008208	12	0.844110344151842	0.0319731102222308	0.0300856837948326	0.0359851751367478	1.27604471351164	0.0180333184949382	0.50328021652433	1.13342266107629	0.391308737985086	0.438463427318334	0.322230366695943	0.0643463620001397	0.375267744725685	0.0645609354435041	0.0220649959044653	0.00346993541750977	0.486517643963787	0.260903185949902	0.0251015839118419
2008208	13	0.804880141588504	0.0306231713268898	0.030761622715721	0.0343009101015683	1.40622491799592	0.0184181392595057	0.412797351135421	1.10922828301671	0.353352395153694	0.398268257134302	0.3581009765543	0.0601541025033604	0.340200360656423	0.0601815566869267	0.0233935239222276	0.00462818013183672	0.540380929820448	0.28107922823182	0.0242923198952213
2008208	14	0.803554213623448	0.0299823990022968	0.0319081764110601	0.0334119791604166	1.44780358076576	0.0183855969747085	0.365941166873201	1.21786319938412	0.319434267299529	0.34692844103873	0.411289179474344	0.0620842640199656	0.319087380400643	0.0565810103585407	0.0234344739860256	0.00639808976119264	0.612134696490791	0.31882554125465	0.0230998979828554
2008208	15	0.816878913574658	0.0299070274773674	0.0317990306362899	0.0344371236763628	1.50119549057155	0.0175764030919795	0.341465714144796	1.27269971435535	0.296048883168766	0.321889578527064	0.45352136960977	0.0678233832303284	0.316347690906947	0.0534348628319543	0.0237746620085075	0.00809061174108685	0.642074240607464	0.349824924704142	0.0220531346159641
2008208	16	0.842297067754874	0.0300412047706695	0.0285400072518515	0.0421979552252256	1.56826673171764	0.0162565907376322	0.330659510565072	1.3157008473894	0.286861774088131	0.291580541369827	0.528703333993692	0.0720380431794818	0.333962770767644	0.0510546134538566	0.0245457609807448	0.0104849097570998	0.717866113684754	0.369232512259925	0.0194506156218398
2008208	17	0.930581759145836	0.0308582519655982	0.0229635951019499	0.0662233703874021	1.61921391700807	0.0149542321416091	0.324564302921115	1.34293356703637	0.290257260812063	0.276629385242912	0.568562777963603	0.0738034215391997	0.354951759422206	0.0492532023825596	0.024860960637278	0.0143838585581805	0.866260872717952	0.386084008996695	0.0175231088502324
2008208	18	0.994983604111026	0.0344236564024237	0.0192823783814381	0.0923829819400301	1.66792864825499	0.0141522407464266	0.313593781913563	1.4031692374097	0.292681433074233	0.27188853076803	0.581282121316887	0.071592077536949	0.416291819074905	0.0483864760571665	0.024929422819446	0.017868689957122	0.82004796024425	0.371652378806398	0.0166244324930964
2008208	19	1.10058969601397	0.0555212971772396	0.018545016061727	0.092041335028164	1.87640739569677	0.0147106105061	0.331615041324224	1.40923735637759	0.286509848747686	0.26947052892067	0.584988001093595	0.0643622190856335	0.543688679584339	0.0488355466357531	0.0246605161845764	0.0201458881550303	0.672080230119284	0.350119079266918	0.0163594219299293
2008208	20	1.21521117365603	0.104196256110911	0.0173787488515616	0.0675895941164828	2.05708526067717	0.0165470423718964	0.400670200912032	1.46125484708483	0.282887290991518	0.26044050723936	0.489769763646568	0.0536888066581624	0.682116056034581	0.0487618937932836	0.0237725254093442	0.0217536618273373	0.542022315324072	0.323782037240981	0.0172524818646998
2008208	21	1.30908253132709	0.141659614308765	0.0166279131200028	0.0561829025088101	2.02867060533078	0.0213424243022785	0.452615756748587	1.59660904141	0.276992354822922	0.292608872690824	0.442310941726845	0.0420197702059877	0.749173675223562	0.0494330793798969	0.0238614885102301	0.0219738630595317	0.497494827314572	0.28609410526177	0.0209990888910421
2008208	22	1.33617446026518	0.1267385619143	0.0170500166487687	0.0610352048306243	1.96396336729241	0.0278898901660315	0.467045636596632	1.74714936926536	0.268749233750271	0.347097624981667	0.439214406430743	0.0332049187131546	0.782272473105836	0.0506244887995253	0.0234112792192825	0.0214756855745707	0.472432811270431	0.274717942490442	0.0352214842883193
2008208	23	1.42777113064921	0.0835457428148182	0.0179072610072491	0.0693408453442517	1.82116064554963	0.0285968950040498	0.458100670788976	1.88379277737106	0.274134636684013	0.400792384332217	0.50799262867787	0.0263718861430873	0.783399677813744	0.0525294465762971	0.0233263156993867	0.0213429851747545	0.402326936061422	0.28040988645381	0.0820661686877669
2008209	0	1.54976832889769	0.0504549706084202	0.0190063224048516	0.0762815548877279	1.54968577190921	0.0284725436991426	0.421029784389869	1.81556237624096	0.292166527741765	0.432813913843586	0.62826490434638	0.0223679292636512	0.762294380172827	0.0552896500000986	0.0240885476298827	0.0213788620981109	0.349428356106685	0.300044481357371	0.213665766884231
2008209	1	1.65369340809815	0.0419074091130461	0.0216821755598906	0.0793129409645793	1.29818504468119	0.0282688902418806	0.344943941178591	1.74595956987066	0.326183268005299	0.428345569215263	0.677084595295011	0.0225945409752058	0.742859827534002	0.0589845753929442	0.0254066858215662	0.0217721449963258	0.342785000844735	0.344385109627556	0.345654451625556
2008209	2	1.73410588178848	0.0409375535095858	0.0245467054707339	0.0762788241771728	1.10184668110824	0.0279855011702327	0.284297162789837	1.66901188885263	0.426153518732446	0.415670196389294	0.701736700479905	0.0231020102928364	0.740719668115096	0.0631841081261678	0.0275347302635256	0.022312596167381	0.36353991589704	0.400841591942739	0.367865869945045
2008209	3	1.68228260449094	0.0411255984486097	0.0279156638852613	0.0689575353945264	0.953412196689561	0.0272724339369912	0.291792388836096	1.49614473664853	0.528293746780054	0.375506902360746	0.615572338074127	0.0219738155713439	0.726636857130273	0.0673952771741985	0.0300050824218985	0.0226075375903918	0.393602933594882	0.469663752067256	0.372288918149881
2008209	4	1.61089457440549	0.0431398369657248	0.0321888510931897	0.0597501763074116	0.868654577113674	0.0261561656543873	0.354948854294874	1.32631725178214	0.571234740590073	0.321993659814474	0.681152424780496	0.0188324036425808	0.695890059696607	0.071022148127966	0.0317856794254128	0.0227287959147172	0.385097505416334	0.525814740901919	0.266635466913994
2008209	5	1.53869733238217	0.0449014734324187	0.0360301707763655	0.0497735241185744	0.81203851006354	0.0254512871758089	0.50681148477138	1.20176073386425	0.546994427349617	0.322751799877571	0.749877154050385	0.0173520320223103	0.668298109778611	0.0730424183340402	0.0320834075446382	0.0225461356815955	0.356856546492088	0.553841628022392	0.190840615413907
2008209	6	1.43483755819297	0.0455679023170923	0.0395498841089108	0.0419072459998316	0.87261700195454	0.0257765534365948	0.653793994231242	1.10498112292321	0.543588500939433	0.396205345998134	0.433399734141792	0.0159751849235342	0.610126058759615	0.0910764083408698	0.0314308174704989	0.0226287696374936	0.303926976294946	0.53677137533115	0.0963101330509037
2008209	7	1.27419000245039	0.0449208186835017	0.0452069650950774	0.0365420331671252	0.874566435231656	0.0263747349425822	0.678905206861837	0.999483814886445	0.583616414734952	0.567304477487193	0.301736395312579	0.0147048151337617	0.518716664882756	0.116475705825265	0.0305646539736916	0.0223488707639059	0.251947142065847	0.541584293981799	0.0499712959446867
2008209	8	1.02816027551214	0.0425890716778206	0.0548749867000209	0.0333807735915843	0.816733005509537	0.0263694104233253	0.615934956528841	0.89107515945287	0.545673532777043	0.636291753832781	0.244516224244991	0.014334670178269	0.495345005332441	0.122590720585242	0.0295689355310896	0.0232571951865214	0.177836702116092	0.517954322976388	0.0291910580172259
2008209	9	0.808858050304722	0.0379035730112153	0.0730375078584167	0.0326970219178191	0.744309688876863	0.0258930378951734	0.647964304768649	0.81651620073292	0.488818355803616	0.571801234821382	0.206519202568642	0.0151019550669929	0.492349668140906	0.11408000371412	0.0301724699871832	0.023044541731595	0.11388752738849	0.550859331130129	0.0189126110674583
2008209	10	0.66201664209297	0.03538178629486	0.0901180889309463	0.0328954972289499	0.587853031207407	0.0259270917335767	0.58594265670476	0.8069933635058	0.390920073730404	0.42969249781705	0.190995874127563	0.0181696265551449	0.480320691839487	0.104022638664486	0.0296863682541408	0.0218978419129566	0.103376227961965	0.514989278962961	0.0194252825700089
2008209	11	0.559651271692049	0.0352262228824763	0.106250327480877	0.0319693751336565	0.543401408045413	0.026187009901598	0.464090545348741	0.768996202010957	0.273978930814718	0.342427952395706	0.191855142844236	0.0225295916961555	0.469396418626635	0.0901605424649174	0.0282756487672371	0.0203823134137855	0.110859426781866	0.48899906694413	0.021956263341872
2008209	12	0.521937974344297	0.034383915259428	0.117907552240963	0.0298214862629645	0.703024595236573	0.0259927920438293	0.39897587294489	0.689737916813242	0.230037717916988	0.320443492263286	0.187577973246331	0.0249507528865241	0.448734022779893	0.0824442096680893	0.0267468973099676	0.0190009310124808	0.130497105146642	0.569322449445695	0.0215341194442243
2008209	13	0.50994011065788	0.0315588400144078	0.0735868312755671	0.0268809365130206	0.77679034366263	0.0254996504489155	0.389285715820624	0.716445624690318	0.222062025504469	0.299664486240868	0.178857586161716	0.0226910342254652	0.420620088657068	0.0736198534180845	0.0248385511239258	0.0181321740977119	0.142930822689816	0.761204783822655	0.0187239070878101
2008209	14	0.522643761312616	0.0293140917105433	0.056167705991036	0.0221731415899925	0.887546999403135	0.0252419938424898	0.370258273424985	0.748565750443534	0.220640597922215	0.291342515507524	0.161762383829968	0.0204627101791005	0.451140930042747	0.0680784760682051	0.0235459330150176	0.017737524215329	0.14796592171719	0.930723152111662	0.0186808588464821
2008209	15	0.560370309877391	0.0283743311395665	0.0167840020177968	0.0178807084523772	1.06057885589122	0.0251198496508509	0.342604890408556	0.839076247590462	0.2208444320894	0.29203348401878	0.149519752648368	0.0187129000552536	0.524101536572502	0.0633476113509752	0.0211971264131242	0.0178608567653267	0.15359202064653	1.03832662269952	0.0234141725693023
2008209	16	0.631839047964671	0.028390381069687	0.0113437221297526	0.0157320982584158	1.18109285461816	0.0245835092656251	0.296364996183326	0.993148810767239	0.220589874906988	0.29712563431075	0.156610823994203	0.0143036407656248	0.58696171210407	0.0585063585492861	0.0177686391962718	0.0189294257035966	0.192739540724401	1.24235290894885	0.0305401154842464
2008209	17	0.711793947372198	0.0279065124207273	0.00566805235498771	0.0147206289987339	1.26003060691723	0.0243206331829013	0.243254785503766	1.11729970026871	0.218131407021279	0.277939220427565	0.174784324631398	0.0124155087535672	0.697993249330047	0.054367585162982	0.0165307928093727	0.0208203132411501	0.25738924713866	1.43257021756368	0.0392921352250466
2008209	18	0.824167375929844	0.0271705122120102	0.00842222143797089	0.0135400033117305	1.32543369709241	0.0241968634541414	0.241039034701185	1.17887402104686	0.213965807909499	0.250355241049259	0.179898612557014	0.0121271104343426	0.863915869613973	0.0539103471581025	0.0166146474969932	0.0218652418947527	0.301786299450589	1.73438141435606	0.0492152774020063
2008209	19	0.971153534247851	0.0240598867862269	0.0148642855725702	0.0127042870159503	1.27930401056801	0.0239665175171882	0.248185449559125	1.1833353221825	0.222813816388998	0.251490031677086	0.16669843230623	0.0120100603797235	0.995656445889222	0.056207406485365	0.0203950711306949	0.0214424236550938	0.346195859323293	1.90799540165632	0.0640461425851985
2008209	20	1.13825959840693	0.0195995310412715	0.0173982941174434	0.0127335536566668	1.32011454375248	0.0236696059226306	0.242276607700466	1.19439537209647	0.225504266725337	0.277571104561786	0.171894556948942	0.0124677297599973	1.03381535777562	0.0596544897739029	0.0269015065427745	0.0195471919467614	0.391879306290923	2.13820326317676	0.0904970796939727
2008209	21	1.15889036058681	0.0165944763122806	0.0234914776112636	0.0139673958758466	1.23517285256449	0.0217519349335414	0.241689642639163	1.13352849937681	0.22050125831848	0.284787009422086	0.194322392923779	0.0129003279561407	1.00618796675303	0.0646952105788442	0.0315167591443353	0.0175208619824847	0.413327549610396	2.38905406050341	0.132946071985496
2008209	22	1.03610378780631	0.0156746725606396	0.0286760500520521	0.0157615240566283	0.902871703131933	0.0177156963893855	0.256350174104012	1.11637427107547	0.236335619258201	0.280812094920755	0.203439701227864	0.0149230699543276	0.867661069398709	0.071239916322816	0.0341640634061731	0.0165244023905925	0.382767237929753	2.67580346443604	0.200017280551756
2008209	23	1.00151520147404	0.0140273903204367	0.0327335022978083	0.0204399893089447	0.667074767296537	0.015436377986298	0.293278925466888	0.996714858171894	0.270410377521438	0.321959860743203	0.185183174810839	0.0227515762598577	0.698952744791624	0.0789389506345232	0.0357638507479699	0.0159811850899674	0.310014028523857	2.90278929346511	0.283512862396889
2008210	0	0.916690567139812	0.0132494605982789	0.0358016876506539	0.02792903489992	0.429561018892954	0.0151517768922859	0.355818270648974	0.687276522565367	0.322624188688645	0.387178952414524	0.162678345368119	0.0302860971663896	0.585386662176067	0.0877872245975105	0.0370372834207789	0.0157114155407391	0.25437178862871	3.09257059303535	0.344615119313882
2008210	1	0.779416588513495	0.0132686096610571	0.03732518855103	0.0358654231033898	0.341861329752024	0.0152258998600138	0.421608165079114	0.430261799678482	0.363081237378982	0.444978001836688	0.133317507274559	0.0317015373978197	0.530887157415719	0.0975630466628275	0.0386798525144638	0.0157482469643697	0.231042304470872	3.09725508237573	0.388352123662802
2008210	2	0.648629629547355	0.0138221973573432	0.0366262210552381	0.0475479739192823	0.371776441924306	0.0156073356174448	0.489185995886259	0.345311251198097	0.397256648418475	0.505755793067826	0.128872171601832	0.0307341876268085	0.521077880046889	0.107533937837789	0.0410726330012056	0.0159037264048293	0.213380453418818	2.53395709550982	0.429953202201982
2008210	3	0.585762375928185	0.0144972070477196	0.0332117589410683	0.0711411315108533	0.435078230943222	0.0158694116237774	0.565322188793078	0.334269162817562	0.417049937216652	0.545811160801726	0.126734649984013	0.0268408650088966	0.547453950853638	0.117735629819881	0.0444866793513072	0.0161207060520089	0.218262009302232	2.31794903951247	0.473936164184365
2008210	4	0.578052199975393	0.014948374099851	0.0282054593578957	0.114049538056408	0.48796958572748	0.0160541780647623	0.628744371233621	0.363022739222043	0.428208872926786	0.578362943822062	0.128593258515421	0.0249021821766668	0.617518086236676	0.127966166360302	0.0489157793180664	0.0163667439180939	0.232663414032053	1.74923828465489	0.507513002722619
2008210	5	0.54512578936029	0.0164871028748315	0.0239584385185541	0.149807214544334	0.506845215883276	0.0161128922475315	0.670619927900583	0.406567252524919	0.432524452350841	0.599294907727472	0.136389668998088	0.0245708480438402	0.68467480472957	0.136721006254882	0.0532025029738001	0.0167839854731051	0.243509963309036	1.4799756335916	0.372694891266695
2008210	6	0.499005988909384	0.019632589870882	0.0145952635265351	0.146559161486693	0.452824189273089	0.0160128831910196	0.700883669361792	0.461480250837459	0.424465853148062	0.640741021532807	0.154288678851327	0.0239038299329813	0.882627346453202	0.13852684997805	0.054931276261598	0.0161402990347062	0.241252322122917	0.966610497416004	0.184723017006501
2008210	7	0.437080197356611	0.0220586659315193	0.00920368894534836	0.12217827078349	0.374521330764802	0.01624060530486	0.704610383017675	0.473061398164087	0.422432016004501	0.654032193958433	0.183750466503678	0.0255046950791879	1.06819579812085	0.352444476163041	0.0551513391949347	0.0162496557109345	0.225688165319404	0.755415870484412	0.151276898484055
2008210	8	0.381940714144588	0.0228803345308355	0.0121576993948379	0.0882315893056066	0.355885828934802	0.0166222307532885	0.64091459535069	0.462383600115647	0.432991928736181	0.569781963164935	0.211328223497894	0.0290515776521515	0.753316496422976	0.320488516254563	0.0568550824788868	0.016891278312123	0.198746974614018	0.682443734249851	0.109198708329706
2008210	9	0.346463690225712	0.0225145279700932	0.0180229705184706	0.0608787181454746	0.362276528799612	0.0172222629778705	0.479505780157337	0.413596451357618	0.437118358242889	0.419678463675565	0.230797225418436	0.0343717673942536	0.527564136352372	0.224405009561507	0.0574073504990186	0.0165559327776042	0.168963916258395	0.680318719917693	0.0858260604880569
2008210	10	0.267764651298033	0.0217646045778708	0.0224999986980324	0.0606981530205307	0.356469324275384	0.0179375748724635	0.389243840275443	0.372631868555783	0.425625955504352	0.337595680445537	0.196956907696577	0.0377857540483147	0.406888618884521	0.177618824164559	0.0541706950389739	0.0196406142069132	0.138593188951617	0.777214604447401	0.0598995503711286
2008210	11	0.227203069862094	0.0206488634665687	0.0261524894494981	0.0682739714683245	0.353271341188003	0.0170931523033923	0.344544918745448	0.37275790691367	0.402661502661849	0.288063815805488	0.17037299138462	0.0356221932803565	0.384422355775341	0.150635783885123	0.0499309997601884	0.0199403052508186	0.120617001669405	1.05417619676569	0.0408418973465356
2008210	12	0.230690817897162	0.0195692285359328	0.0281382300422676	0.0750902423871236	0.364443924302453	0.0166619153256157	0.340144186688796	0.388106420150148	0.375782563447389	0.261825792682919	0.152776004699546	0.023108480676235	0.361461215340598	0.133332040421837	0.0435662251093411	0.0199662804756883	0.112607209678516	1.73123132716378	0.0271167338655685
2008210	13	0.244567157812174	0.0192882872888011	0.0298817173051391	0.0799452205788126	0.382586001643916	0.0172615908575082	0.346154055258596	0.397020333259322	0.3644086118202	0.260822841654597	0.121451592562553	0.0135215881043422	0.343906176206122	0.124889534891163	0.0357857489286837	0.0210173320949276	0.113113156385995	2.58419111826565	0.020623851731041
2008210	14	0.276265139674851	0.0204418509320725	0.0314003614582311	0.0774662251581075	0.414016450908756	0.0183309823607925	0.339812774094071	0.409147780169499	0.379393489198161	0.271936814924711	0.0958581185296201	0.0109241002509932	0.343941859197881	0.115687534183928	0.027809690129688	0.0227977528634026	0.117509934184631	3.1921676167614	0.0180514853926569
2008210	15	0.359560540380828	0.0223526324894383	0.0322406815833217	0.0722763158355238	0.452960120452655	0.0197403829344177	0.325992980125651	0.506354054084737	0.410424441960697	0.290283218230661	0.0879769663186192	0.0113276175033589	0.350822998034354	0.111066857913757	0.0219969840873846	0.0246654267119265	0.117804245127825	3.40757269080122	0.0170241521388307
2008210	16	0.465565850762781	0.0246761644509296	0.0330374393875595	0.0622368657976359	0.528545380471934	0.0223995773139798	0.304620350749144	0.548721742338586	0.439503597437758	0.301006179512793	0.0919214697883337	0.0115228004660732	0.370412586153781	0.10956495021264	0.0192901800483279	0.0271398705859003	0.170961928719858	2.05105589055753	0.0170252647807732
2008210	17	0.59127526228078	0.0269581235823688	0.0328157776679054	0.0529402654834276	0.724047659945323	0.0263982097693537	0.291907364302385	0.624275674663491	0.467626047816857	0.308898436151318	0.103787619554268	0.0119652858316931	0.444183549972795	0.111799037272634	0.0176958728934562	0.0300658005018797	0.425141279679007	1.73190270088566	0.0174667256112698
2008210	18	0.707754820052032	0.0308708368147904	0.0317412752009066	0.050540605089475	0.905898123172248	0.0310217046915312	0.2908266763276	0.658696659382128	0.457245763153384	0.313192641455406	0.113362767742954	0.0121138934913613	0.613713247313861	0.117680389260494	0.015433344208078	0.0323237468444922	0.631223131619666	1.29026842048454	0.0194345713675498
2008210	19	0.755745368681403	0.0380626623359514	0.0303646342672669	0.0473151370661128	1.02309108959354	0.035282015839146	0.32650978240586	0.743114860248811	0.51598864427172	0.318618230385882	0.116122964044501	0.0104882216011407	0.890462804600299	0.121035069503953	0.0125917217618108	0.0333373235378246	0.691529526426378	1.36588095058242	0.0255341553948167
2008210	20	1.07931890376043	0.0466603948548275	0.0293013681231738	0.0422051875170382	1.0388138567046	0.0381982400050607	0.372812636237422	0.934461000754784	0.619957553280725	0.321787300269591	0.11759085767311	0.0102251695476007	1.15860242002416	0.126290720852105	0.0111839957567068	0.0338764362040498	0.709510312688667	1.85691480671582	0.0466822320548868
2008210	21	1.16135063825214	0.0478887413484172	0.0287119173594147	0.0374116762875971	0.999925850216081	0.0385855657961084	0.337988240161201	1.00154466509706	0.627759417055191	0.333168148771148	0.119670368014453	0.0143689061251528	1.3829584887795	0.134192432501461	0.0110440713576043	0.0340031626449236	0.67499884621112	2.24265264360004	0.13092276426709
2008210	22	1.15779648794828	0.0449937507867448	0.0282131934874404	0.0353621036314275	0.954331557933671	0.0383103564749525	0.299775373683387	1.02753303310853	0.358536033345548	0.336199679740598	0.119216515095783	0.0182594720651825	1.66012365259254	0.125356864604605	0.0113483063539843	0.0337695618243383	0.500806739270755	2.43717143883647	0.337770075957645
2008210	23	1.05901352361892	0.0374748400548057	0.027954895743476	0.0352331664201613	0.955988577006484	0.0368622078041431	0.300359705037758	0.984574988797421	0.265951578664919	0.327556616084294	0.111212527433009	0.0216500267629561	1.87594961508597	0.0846581871079426	0.0129375476834156	0.0335260516218833	0.281107221126679	2.39637742734778	0.637033437317237
2008211	0	0.968481483416127	0.0312406604178339	0.0281662058082453	0.0359859007182341	1.04118598202019	0.0322697076720192	0.33457749475555	0.878730633865546	0.395252740195893	0.406206303331845	0.0866901097710143	0.0307598314167394	2.0102846614365	0.063227632178402	0.0147620488178193	0.0330613812394467	0.207942507628763	1.80630072744167	0.844231771966436
2008211	1	0.902633819444207	0.0262411282819825	0.028837060581728	0.0384302037822431	1.17003313551037	0.0260348036584176	0.41354402913369	0.816168395575805	0.597838832132928	0.485811958990267	0.0896732409245934	0.0431302625328232	2.26814976168386	0.0582576769408577	0.0164781894850133	0.0321296138891876	0.195944631562403	0.811196224389778	0.922171610203092
2008211	2	0.81385337975242	0.0237458031094699	0.0296082088288641	0.0419852695305786	1.20430959832824	0.0217418026251279	0.502847853313097	0.847981689652176	0.626451445907339	0.486182325959486	0.105030512288307	0.0517021697212071	2.42498260052693	0.0606088105236061	0.0181809385752034	0.0305301055385248	0.225163999340188	0.569771754618562	0.792686100476317
2008211	3	0.733081575360195	0.0228212446927228	0.0300011217987029	0.0475453645069721	1.10363479951806	0.0205319199672586	0.650318563708312	0.945716262612563	0.51573603745351	0.480844615190956	0.116552441903661	0.0520217323483224	2.40108914659234	0.0655438229032604	0.0198459885359083	0.028382584549213	0.393083357310378	0.543564412655216	0.631502284230499
2008211	4	0.699025059705772	0.0220516198402887	0.0298177682817715	0.0647579779821538	0.952745149941927	0.019872311208928	0.765432788977974	1.0380851550354	0.485011511274206	0.501713483037328	0.131282563757944	0.0431969356539928	2.29025878641158	0.0704421177142483	0.0215597649933103	0.0259177634326446	0.634401536057588	0.433542761778694	0.529758108154835
2008211	5	0.724247409509193	0.0214104005680328	0.0293134311751615	0.116216508213932	0.834477583578989	0.0191063032976145	0.828477767367219	1.05124462606366	0.498006410269488	0.557746386248697	0.141092785248593	0.0353911055288789	2.10464015485437	0.073593202806918	0.0245781318391678	0.0235866509714368	0.722560421663362	0.38295952245098	0.430979253932572
2008211	6	0.76966766339332	0.0209574463837836	0.0286034675461898	0.202157010828637	0.702533152766593	0.0184878014316131	0.845187815153982	0.992536180042251	0.499473791672774	0.587207657236738	0.146826944865101	0.0310691653692127	1.76114547013729	0.0862779368672099	0.0273045168207069	0.0207114262214579	0.692815148173411	0.368306408591814	0.3014899497889
2008211	7	0.769427105400571	0.0211571283408415	0.0347308934334079	0.253572919072325	0.605708146080468	0.0176662423031231	0.744074434837991	0.923232662114354	0.498880436101363	0.57001188213345	0.145781232970313	0.0272966878641423	1.02859098851383	0.107042429220428	0.0271791819844056	0.0257007614051525	0.465311952768266	0.342640437433621	0.196913021285269
2008211	8	0.971910639584277	0.0219477907867431	0.0472339035355059	0.189050198842745	0.538547476530155	0.0184751879941945	0.685395307091771	0.849094803657754	0.476311504745109	0.485502842683372	0.13877025495253	0.0236623975801977	0.590067848153215	0.134730732307677	0.0286526302005471	0.0319281086618819	0.329197505923026	0.321859193423301	0.138779323657754
2008211	9	1.00442945471102	0.0235357478647665	0.0791811965074627	0.131562123684456	0.555917419332647	0.0202174344900099	0.549773334442251	0.756938785364317	0.448066414787337	0.360802959988114	0.138918565708777	0.0190321754441212	0.467518838870885	0.15023504818803	0.0254508655258953	0.0292363632812636	0.352132229982022	0.319401966730159	0.065412932717949
2008211	10	0.990556191337928	0.02595820086179	0.0797196065094652	0.101579192180431	0.776376940179253	0.0215173748343465	0.462082375772497	0.750696111804467	0.401804223705956	0.313120851498143	0.146438241126576	0.0163098979980749	0.415244418197873	0.156326741135752	0.0171385418784574	0.0285595542703028	0.529736681505929	0.308688020529666	0.0345878078431535
2008211	11	0.961728523043201	0.027768644856311	0.0751244080776212	0.0812692118494816	1.14271936808652	0.0207125561807448	0.37908796853383	0.732979947515757	0.343293086159852	0.260943298367973	0.150468847865674	0.0158705006063616	0.416049910035003	0.155904121710976	0.0104530866061589	0.0276108749479787	0.573188624906493	0.301090801691897	0.0833118733541924
2008211	12	0.988352065476491	0.0297723854654132	0.0701874859846535	0.0628926438686369	1.37178417120485	0.0203063137267484	0.328332410165855	0.808565134090088	0.29194031619957	0.239482731571989	0.149944831983759	0.0172223901650393	0.432337305678712	0.152975424046711	0.00789985644037502	0.0267196204113946	0.359531682231728	0.299477011757321	0.108855289334056
2008211	13	1.05653176430815	0.0329720023581694	0.0663724079710677	0.0522785355674849	1.37795652752794	0.0201125963417405	0.289191655336895	0.991590649904728	0.258041453212463	0.218537963843339	0.150613425749504	0.0182909784563897	0.448095672045188	0.146965263994893	0.0075804495180934	0.0253614675870806	0.205783346609906	0.30367733658163	0.101981089508511
2008211	14	1.17811606482517	0.0358680561226212	0.0644344892315166	0.0450823848498454	1.3007713127835	0.0199889864868491	0.267995627362298	1.23375695361103	0.239737831182894	0.216459140827357	0.147082638889832	0.0176846908472207	0.482273726381757	0.135366900054373	0.00792814430874857	0.0241886428142213	0.152915136053577	0.316584113687268	0.0944112948746327
2008211	15	1.30060777446977	0.0391630075933286	0.0625132396785029	0.0400154687458307	1.23332355003996	0.0199652964725516	0.27489483088054	1.35157718612506	0.230621184550542	0.227195886200429	0.148319652895928	0.0167860901868127	0.545071702700924	0.124274912595702	0.00898621794919698	0.0227000107402785	0.147938853828365	0.330106939850663	0.0806586150054903
2008211	16	1.50752963460302	0.0419541730953988	0.0594407798465878	0.0368223944963447	1.21419186927972	0.0202048047390333	0.304739543200375	1.28961049765793	0.224737093450885	0.240778837407409	0.14084223661062	0.0171151162729388	0.624737077109257	0.116367721793736	0.0097570352692279	0.0211076295895196	0.155007061646103	0.334829553676079	0.0745884718596853
2008211	17	1.7624396427207	0.0427436967809218	0.0553047898864694	0.0396879044767046	1.14275261519282	0.0198654828194246	0.387007647143221	1.18598360653259	0.220908131440411	0.293123190248743	0.121112908180988	0.0183932692521038	0.635864450843362	0.110472283313474	0.0100794101246125	0.0188495929300678	0.171222869588051	0.3045937803635	0.0898536907373873
2008211	18	1.94386404306714	0.0411673462151803	0.0501120684303445	0.0650184776103165	1.15672559821446	0.0187098942387733	0.464770433585417	1.11977064836719	0.210648969489766	0.411419952733421	0.102953253172372	0.0217315405065649	0.634190683466534	0.103993889002063	0.0103038788862263	0.0164230457327339	0.193155136939471	0.246539177520179	0.268606864220014
2008211	19	2.06050541740093	0.0391313697137972	0.0425711918318598	0.0891891992785733	1.18171614135137	0.0179090531014814	0.392289858449678	1.03282748454225	0.208249970207337	0.502091517605901	0.0950720647957356	0.027374572839072	0.615721007488296	0.0930589677786604	0.0105247405774165	0.0151645905766174	0.213277470512305	0.205665006582271	0.631348097299105
2008211	20	2.09739759548942	0.0369197807567877	0.0382020834432883	0.0871707818494423	1.25505952714657	0.0170930439980361	0.390077984495241	0.976540760578976	0.240981590145605	0.439459745503141	0.093896627726303	0.0344181602919702	0.480138130923056	0.088137367716892	0.0109212310701402	0.0143001197913549	0.234160887519161	0.191894679898493	0.840047484452489
2008211	21	1.87640858014753	0.0354918119684889	0.0350658459304637	0.0816994899028072	1.26048459259442	0.0162159305106048	0.448359221386952	0.974586186672292	0.340386896591259	0.393503895600435	0.0954540197560447	0.0397967604453485	0.470338979905206	0.08618365229134	0.0116986621174088	0.0136311075863959	0.275437539553588	0.202967583984713	0.924389958578361
2008211	22	1.77791435964581	0.038809032850609	0.0325736185581104	0.0833910848116598	1.25989261060614	0.0156920752024407	0.459150697589527	1.02439191867553	0.406229774218316	0.374668476645441	0.0982271561076881	0.0421820628519928	0.397905459329428	0.0840772742057329	0.0124698120611128	0.0131077653508212	0.311412913306742	0.301648791507127	0.935108380107946
2008211	23	1.71482054264847	0.0429747061017145	0.030585776176178	0.0882301059262491	1.20649790250816	0.0153404686870981	0.453946878659653	1.08301850273971	0.381851342841711	0.339302678218438	0.104167758592251	0.0432869605837075	0.424570035076416	0.082943130899722	0.0129219015703994	0.0126818835131573	0.310174782633891	0.432500407346967	0.879886499717995
2008212	0	1.67187296165256	0.0409901966332494	0.0287954484050833	0.0886948717468069	1.09114977024749	0.0149269715955778	0.434987646736409	1.13345920303548	0.348791255264617	0.332634312744554	0.114791490335572	0.0430489655620487	0.481586972705935	0.0824669321457283	0.0131198835441423	0.0122802125679977	0.26219164911671	0.517234746402586	0.816249240341161
2008212	1	1.64878383217294	0.0366954477701524	0.0272197161092513	0.0818694257923913	0.89264252584962	0.0146163992166153	0.427705712036452	1.14380890838497	0.326662027643819	0.329746018030283	0.12673656045844	0.0416723524627213	0.57645079052837	0.0837607390383965	0.013237540228099	0.0118682053882151	0.196204738318056	0.526328857511344	0.761331109675467
2008212	2	1.52253520142304	0.0308991301262598	0.029729232971646	0.064511417636342	0.679018864378879	0.0145052360357954	0.417695420053608	1.09764032336436	0.302859830059699	0.346634998598799	0.13818365315239	0.0389188962021396	0.668245592638671	0.0846915695699905	0.013395522267848	0.0114605791737705	0.134647322177854	0.473334809764541	0.708230542876764
2008212	3	1.40238941346993	0.026836475563038	0.0276628768301837	0.044003981512011	0.520265254468902	0.0141892544925481	0.427451163779718	0.981514001002826	0.29126401925048	0.373871755010794	0.149064168328581	0.0332875729988853	0.732857727202311	0.0860454035723682	0.0136282496538618	0.0110697785771803	0.0982860199825685	0.450773872499792	0.665549323425522
2008212	4	1.24841261813235	0.0251895342304438	0.0258325390766076	0.0302160675249718	0.414659927974104	0.0137933158852953	0.445015609049679	0.868791045490263	0.275502211700301	0.39382914670194	0.160507021663062	0.0384395137439821	0.726649919779374	0.0870672343386709	0.013802739858656	0.0107047484523338	0.0754181044469592	0.425857860657437	0.641638799975637
2008212	5	1.16699265546058	0.024161528698792	0.0243890071277076	0.0226869481956053	0.343729388742628	0.0133951130214263	0.45314129982921	0.690211610115432	0.266312041176559	0.431272400393538	0.175861463495406	0.0636706934327991	0.686325650444555	0.0869604809614927	0.0137525092786457	0.0103496322046276	0.0562810382484265	0.399292007530279	0.630955488946493
2008212	6	0.924615300906564	0.0231889421310052	0.0233484053180613	0.0191115950527711	0.285320426034237	0.0129486837193716	0.460102691746575	0.521842119366204	0.271060294288345	0.427150937065793	0.193332660418375	0.0683036277509997	0.681205368076067	0.0855661989128451	0.013754599570375	0.00995630579336211	0.0442061395055935	0.385375951118606	0.618212896484468
2008212	7	0.713881207325313	0.0220474297347511	0.023366830181925	0.0166643688426173	0.254039598554108	0.0126843020127678	0.449617952458411	0.431242011973437	0.277220140219697	0.397918378080459	0.206338453539803	0.0517973592562668	0.590727147180513	0.0852783892611968	0.0137561156869181	0.0105844042298767	0.0362641467775409	0.374986396088149	0.804039712028879
2008212	8	0.568817310015751	0.020676022566912	0.0355711730543268	0.0152810411695563	0.251053723384507	0.0127541638424179	0.427874730635862	0.392035915949995	0.282353696235117	0.3821246540793	0.210792762370213	0.0327271003994311	0.55111807325925	0.0991081224431613	0.0135062043454128	0.0170483016710381	0.031323189836389	0.339715959227909	0.710577270524855
2008212	9	0.482956735580034	0.0192216047992918	0.0437920716792606	0.0154361340300555	0.233851356685616	0.0149320757724021	0.358241092988748	0.338375972478767	0.272316388199363	0.338580338192425	0.208464225082244	0.0221972414190642	0.555598052201747	0.107034031762702	0.0128790166065823	0.0178892607062525	0.0381393101112926	0.297296183512954	0.522023352943652
2008212	10	0.440000441125049	0.0176485869734494	0.0441935200266915	0.0178041438731048	0.214148007005687	0.0167311736282246	0.297988925423585	0.319727214585925	0.248063623944095	0.305549584815816	0.20920512292199	0.0164425804454341	0.588779004385071	0.0978525917315444	0.0124765098505237	0.0189859087848943	0.0422274234988918	0.252059130320063	0.356631555073458
2008212	11	0.427767305066022	0.0167160552552323	0.0432046190976882	0.0206736989837624	0.211287867589121	0.0177128651174972	0.27611226898269	0.330046020126666	0.218451338221747	0.289731449406447	0.208892333046738	0.0136835958580069	0.564638812414842	0.0882409785073321	0.0121442665602781	0.0182031035481614	0.0428465479992508	0.211739356030866	0.305795050513537
2008212	12	0.428232914396491	0.016681279007949	0.0411566196188515	0.0221888227304928	0.208852265511909	0.0178352266653142	0.275758532070648	0.331644754440535	0.180283606282673	0.28114230717057	0.207293652470047	0.0122908134609507	0.539560520581142	0.0799345359011482	0.0109353353759662	0.0170247277381071	0.0444354819210487	0.18758599694206	0.291444566634665
2008212	13	0.432686887796378	0.0166932911982052	0.0384054424682306	0.0232077880023629	0.212184013174292	0.0172769374681593	0.292731540256973	0.328095530289907	0.15383590962194	0.293276455543525	0.20370759883674	0.0117477750430882	0.450797029851293	0.0743846875347806	0.0104215027909516	0.016126767660511	0.0496522169299141	0.185838127845141	0.281770925272363
2008212	14	0.453738865185838	0.0185135882403417	0.0342291551295704	0.0233493052624634	0.225598290615158	0.0167271676213091	0.321723737628003	0.318629414350742	0.131014064561438	0.319386922241178	0.193064804113382	0.0120654542707825	0.385466559360456	0.0710908109675372	0.0100708672091018	0.0153984925792394	0.0674646680685753	0.219901445483857	0.314335014199932
2008212	15	0.481515133186242	0.0200550517083497	0.0300635316552155	0.0229302338278835	0.261295471512214	0.016012542350779	0.343613550222165	0.318331773162139	0.113205662675954	0.352700568774963	0.169753360597871	0.0134650531587438	0.362553907854933	0.0699469133458279	0.00985184851322074	0.0145637942125955	0.0905694261693828	0.330414580370868	0.296696793756208
2008212	16	0.508644021055708	0.018989977401715	0.0260092927290388	0.0226269806813313	0.315352381964488	0.0153169143711516	0.348282690837348	0.321997803449774	0.101770960331459	0.375424314054176	0.144038021073165	0.0153158850540838	0.362565970084814	0.0717318607889945	0.00970795632473845	0.0134570528835366	0.111970012143011	0.39911280489116	0.248293732387601
2008212	17	0.546615536950285	0.0170792634353608	0.0224342673417216	0.0223749632877287	0.487474087264399	0.0148025152612964	0.338552532580652	0.333358737298698	0.100353771589439	0.383956849085177	0.130149245743369	0.0169910318695442	0.385707799517666	0.0758913029683927	0.00959472066541987	0.0117313672277203	0.127099062742614	0.438131255425542	0.210174508266302
2008212	18	0.590340467748098	0.0153590308816717	0.0195761304742228	0.0220036366757562	0.834985076981855	0.0144807465597293	0.31715056174626	0.363022696294209	0.109030059382938	0.38286238007143	0.128788021389011	0.0193317730267642	0.460539458487303	0.0817371265248231	0.00947260699016516	0.0103839338640113	0.125762885150998	0.471466540739813	0.189656647346886
2008212	19	0.635590304738826	0.0147177279309831	0.017298097738299	0.0207088700485509	1.07828996769581	0.0141817639567646	0.299431609344525	0.445177294657683	0.131523990517214	0.374123413730132	0.124088633837215	0.0221296609888887	0.546130906468914	0.0898924732783695	0.00923538227498078	0.00991906265461808	0.107530447352695	0.469117717529342	0.185746237776531
2008212	20	0.682810385319039	0.0170496725589648	0.0155630231025829	0.0188092902476831	1.24719550459049	0.0144612393489409	0.294452534329565	0.560956528667361	0.168306286980445	0.351159875919864	0.118236974728884	0.0242605688940473	0.616278821863362	0.0996092309263449	0.00908579333690091	0.00964239058647558	0.0969445030238375	0.358368862070906	0.195919511528125
2008212	21	0.737995959026966	0.0201348057769667	0.0140793865625384	0.0159139332489485	1.34706716426984	0.0151371582398267	0.299744679202838	0.782913982806638	0.213261784458672	0.324084183367222	0.118534786478518	0.0262052665783215	0.70758075389936	0.120032980454218	0.00901076824431494	0.00950555076323862	0.0985131669072292	0.219006351235454	0.177986455073826
2008212	22	0.801721882665154	0.0204593590256557	0.0130647974359723	0.0131921301392034	1.32005243980362	0.0157383121686218	0.306035274165262	1.05555155453292	0.268559214054851	0.311324652606087	0.119504642446094	0.0271934212334148	0.819869966502811	0.164072382014158	0.00904785678257921	0.00951417550583201	0.104488799359044	0.202358830692475	0.153056989019955
2008212	23	0.863263859251045	0.0203661091260724	0.0121556059811212	0.0123342221631246	1.09486527611699	0.0158648356767165	0.32154778053471	1.19393811249106	0.336927644912543	0.309393802436134	0.124013331227194	0.0275751369741983	0.952252142876795	0.230195470699547	0.00922558541018505	0.00977533664941346	0.112179337505048	0.27795669954646	0.140681216421594
2008213	0	0.925292128449985	0.0201726024013985	0.0113294065412627	0.0123405148527749	0.817358078387446	0.0158178974544519	0.350924916894724	1.20408461398788	0.387643451066649	0.313980837116338	0.136327875336276	0.0292496440914658	1.04112766876091	0.308687647573684	0.00930636792171643	0.0103660798146096	0.123808358968769	0.386161546945713	0.119435555616761
2008213	1	0.984207410772439	0.0196952756151132	0.0107876168971694	0.0118875394602099	0.562724735011555	0.0157515177881169	0.391608773623937	1.08173822302078	0.410079317494623	0.32963018148005	0.149670474087784	0.0302187394799043	1.17219031745075	0.407413175576352	0.0092332216398755	0.0112916393805964	0.136160425306328	0.494494595490225	0.102222737670552
2008213	2	1.05658277876092	0.0184848334765507	0.0106518184587498	0.0111996779949049	0.462241592349298	0.0156122760873171	0.442375751061578	0.835947203714178	0.424287309335964	0.365623144299562	0.165049574401987	0.0304745543241092	1.27948694419514	0.487948053321286	0.00890407250169714	0.0123008132883876	0.146558059551774	0.575907145526337	0.0928848541286968
2008213	3	1.09971777003226	0.0168477026091662	0.0105154358380056	0.0113775952992731	0.35468724821589	0.0151992126257702	0.502537709561802	0.548829365349809	0.434697550333315	0.430150296125418	0.174854793345048	0.029651276078194	1.36521213128538	0.514344737732897	0.00805342181586733	0.0131458192216056	0.154435589506905	0.640027249789598	0.0888987732330997
2008213	4	1.06843132796566	0.0152074112729335	0.0103014536273833	0.0142034186124545	0.283166408286066	0.0140761562252733	0.562402943722165	0.426026765966712	0.434506094518785	0.520835835882728	0.173774931877303	0.0291296103573205	1.43144613789188	0.520951623927967	0.00700780267397671	0.013651653293709	0.161769801365535	0.682148553844806	0.0855048693797638
2008213	5	0.987175408539397	0.0140775230542976	0.0102662580978792	0.0188185396698299	0.286620883534067	0.0127118849085922	0.620708544164502	0.375944117012992	0.444743701074969	0.621884733245827	0.159897356207469	0.0224224210255641	1.46180798015886	0.580722921984635	0.00624742915994636	0.0136544544980371	0.169210654514701	0.688282676262237	0.0784674035293359
2008213	6	0.806572095095982	0.0134952818398062	0.0109240676375529	0.0190181248789906	0.299078782771666	0.0115088806139931	0.678801041952568	0.36053924553989	0.448706393553552	0.694815465635186	0.14418954092601	0.0162971184076111	1.44420678443188	0.746519186930859	0.00588579583597237	0.0141480203981862	0.176360356849292	0.66236037300011	0.0665798423029423
2008213	7	0.669449992522009	0.0131927714283591	0.0123100358853126	0.0162772914995345	0.289566043601526	0.0114312348412314	0.692731371697741	0.339277004214888	0.463376799632161	0.696486963266475	0.130944509660706	0.0107509298625233	1.51811749564295	0.716793570752628	0.00601042200869503	0.0141228151617104	0.182566541882722	0.605964398847313	0.0553843175702979
2008213	8	0.636856454195351	0.0129342220156835	0.0152816652239037	0.0134639686529931	0.286821249045688	0.011176335860377	0.569235047973849	0.372920911744148	0.438091935259003	0.662428224043534	0.125082384957211	0.00815649816800221	0.865726586797405	0.444940047323763	0.00913672222878988	0.0136494621768906	0.167984199087039	0.501572357804599	0.05134380539668
2008213	9	0.572647326284405	0.012721854068682	0.0273065385582238	0.0127163181955928	0.275950072770306	0.0120852290972885	0.411392615964953	0.371389510180984	0.40906436331105	0.444216166752968	0.122238796108265	0.0081217383840966	0.536365803273037	0.360822351323782	0.00954495827857547	0.0132857443484775	0.141392322760165	0.425761402440182	0.0472359308388051
2008213	10	0.481716275880066	0.0140094923461217	0.0387779456579787	0.0129657646446468	0.241682448462073	0.0132182839178375	0.316321568521995	0.351047979067205	0.361266997106264	0.298737374278536	0.115926187335772	0.00889202586912024	0.403379970186564	0.310240967097003	0.00912272080022026	0.0132777050318998	0.133147655545669	0.339589868493428	0.044145641651027
2008213	11	0.442282519756863	0.0151024360545413	0.0380380144969778	0.0144472479068985	0.237221394455156	0.0135357784720465	0.279536617560977	0.395440303951969	0.281507177168725	0.230036340140129	0.102989130260651	0.00966000835908463	0.332190271278998	0.271981243514036	0.00865439630876807	0.0135004356785252	0.13259962937343	0.285383252891143	0.0418641572894581
2008213	12	0.402557052195086	0.0151072743466279	0.0397481002587659	0.0159136605336235	0.2294665066986	0.0137764867692048	0.252659469962205	0.407597747248184	0.219646019392679	0.214989976354408	0.0890142335420079	0.00949344228592322	0.304573403214117	0.229915237754807	0.00811377984950322	0.0137550083745066	0.136072579474605	0.257632386409724	0.0404769060788514
2008213	13	0.408991066868484	0.0145712993817766	0.0393023379719825	0.0164040989786377	0.229765124440418	0.0139278389450611	0.238765623728618	0.39318256694739	0.200438573840823	0.202157792543206	0.0790565537585949	0.00925553073299042	0.28271063671747	0.191743714835052	0.00755017460838882	0.0138954809746615	0.141893438459678	0.275180119606525	0.0387722036446104
2008213	14	0.461844157163103	0.0141839975825375	0.0381837639538449	0.0153547846963004	0.260218352962278	0.0137600596615269	0.224013293328968	0.400637733962078	0.196343466284826	0.209992910779471	0.0735089237203009	0.00944396722373591	0.268029484496111	0.159072874158886	0.00695162019795203	0.0133697861455368	0.14327083978636	0.326224065917241	0.0370938057944453
2008213	15	0.513620124289428	0.0137977453544825	0.0368902156660469	0.0139532711944143	0.33342493689101	0.0137078171491489	0.214707283509371	0.441338488939977	0.196138338514123	0.22193794563311	0.0707533714581974	0.00853786904385556	0.262727911745951	0.134180858482155	0.00645597501260746	0.0127329075815678	0.134488049837228	0.483870209221533	0.0346108631706038
2008213	16	0.649163581037995	0.0134784462301061	0.0350556460260562	0.0122031372749212	0.489321966403794	0.0135489946980704	0.208816072901172	0.464767503320688	0.20074580979657	0.224345970897548	0.0700837388293076	0.00683858141393565	0.291332550772333	0.116217790497048	0.00605994236907332	0.012071331002943	0.130444985613677	0.715708119880096	0.0317244028713011
2008213	17	0.950309091420636	0.0132044161193511	0.0325158905689203	0.0101324050712031	0.765128017027968	0.0130518495490281	0.206108328499505	0.496849313562814	0.210188864409206	0.22332397895485	0.0717330285201332	0.0059901908060263	0.359757915668123	0.103078495498584	0.00580078579666554	0.0113937938670614	0.141038970061263	0.779946316860755	0.0280742022895614
2008213	18	0.941622826506484	0.0129886836233073	0.0302704434268849	0.0082683493976186	1.03965629501409	0.0123127443972329	0.21456270482602	0.567956381611362	0.227218124153923	0.234183102663349	0.0739727819194813	0.00575782703079073	0.489322664158905	0.0955816312685721	0.00565059949441157	0.0108111075198536	0.158946528900266	0.651132252273709	0.0242196362885146
2008213	19	0.9967938193095	0.0127717031647948	0.027405429089102	0.00730023736471296	1.22519782130806	0.0115504957733125	0.236991118347111	0.741562644505412	0.25707867314483	0.256984413934879	0.0775985747942554	0.00569943867823416	0.616971728500597	0.091872167804773	0.00547675326198831	0.00999012999378485	0.180898945845198	0.700471159066616	0.0213631936054671
2008213	20	1.0407002545132	0.0125956837661514	0.0251335490695873	0.00711780114765156	1.33621130962216	0.010897447915406	0.269825689706342	0.994629201105761	0.275984196774577	0.280565537069639	0.083340376406189	0.00576248117451158	0.712169193810271	0.0898195879006478	0.00554576244219592	0.0090947504054538	0.18913280502691	0.764033204443444	0.0194550001473754
2008213	21	1.13409095288937	0.0119249462096115	0.0231065556438489	0.00673538903893184	1.38320831869872	0.0103312760227426	0.326369063947463	1.07092069258872	0.283869562308057	0.314326202878507	0.0919385941362163	0.0106707372773489	0.784811926991553	0.0921794337760113	0.00586935056078524	0.00838196454366492	0.204853952348587	0.784607822360396	0.0183660498471917
2008213	22	1.12880844527121	0.01054335901218	0.0213857187717113	0.00659950212767045	1.22918256214197	0.00992358056418249	0.408464717568707	1.10178830566987	0.298881746557778	0.379747068390057	0.103054882782107	0.0271932960021161	0.878398599740961	0.102765588442473	0.00623620899799965	0.00788851982434185	0.205883111427491	0.753068332010116	0.0177352788485136
2008213	23	1.12580230336043	0.00915179597451057	0.0200568102520503	0.00677783272123271	1.05122007941877	0.00984167412232267	0.468688089180123	1.11785085378191	0.322466338960027	0.488000491529057	0.119167656256532	0.0691107544472477	0.968211346220592	0.119187402509664	0.00620039676742771	0.00755029128085334	0.168472281693447	0.842408067488734	0.0174760688666645
2008214	0	1.15967089031842	0.00836652431382995	0.0224480579186554	0.00715146631109243	0.649468816467582	0.00981814277436568	0.468983771120799	1.10717884696908	0.351232880195176	0.584537629490347	0.143042066398302	0.14084494915753	1.02628628653863	0.143115378279296	0.00618694889772636	0.00728178627902288	0.109516332201756	0.782043383091239	0.017428526163037
2008214	1	1.17226118841544	0.0082141924498211	0.0215563180412552	0.00712116750592521	0.359209013436446	0.009902568319244	0.452725018160004	1.01620637295353	0.376495060401875	0.642666744304231	0.172754244879151	0.16993505378364	1.07415117347662	0.174042813336362	0.00716382537723964	0.00702813891593387	0.0639429568381293	0.662621785037508	0.0173420060513199
2008214	2	1.22670015560025	0.00815224980437905	0.0209253834887376	0.00692937030432546	0.199107387625967	0.010061610320425	0.477303821866705	0.745445952332936	0.399662623930997	0.649565694842559	0.202057979459844	0.165934249425228	1.11771836281458	0.204609621646673	0.00897540020645685	0.00681068951922364	0.0433402746848487	0.56383260832399	0.0170702836146623
2008214	3	1.17857395097394	0.00796144902623279	0.0202570996585138	0.00675238615213072	0.167721503368677	0.0101454194307474	0.513729881311602	0.500918977672568	0.422572974524343	0.627430938836739	0.244306628948804	0.159995072918089	1.17837864069472	0.231705385727723	0.00971856496177274	0.00661215573839032	0.0298275054798305	0.505628018991681	0.016449171013041
2008214	4	1.27485342194788	0.00778800460703273	0.0194824224430316	0.00669218595224394	0.158591752963742	0.0102387162502406	0.5709196673851	0.384824287902479	0.442560127700004	0.629711732140088	0.315149386090958	0.151811058976182	1.26972970491233	0.255127171555132	0.00982205095860319	0.00642687807004941	0.0223677639498807	0.46664995701491	0.0155086854429006
2008214	5	1.25578611764499	0.00768162177638662	0.0194742122557003	0.00668611746081536	0.146947571062121	0.0102871078052536	0.669605873799703	0.350387056760157	0.477426357877634	0.652441327670712	0.358945842999567	0.144097748755227	1.36438018662768	0.310700849203288	0.00986278668246756	0.00628126555765186	0.0205656884075903	0.424349743289013	0.0145906592196024
2008214	6	1.18503457609932	0.00761210978217013	0.0182779240576019	0.00669830597647061	0.144801057951665	0.0102907034098826	0.776185983385069	0.324946520609293	0.540874553375303	0.734202695383082	0.384858090434837	0.143148979055238	1.41153036869838	0.380198779450974	0.00976091905908265	0.00673348757136143	0.0187616034166408	0.374551887724772	0.0181337729755063
2008214	7	0.679123388975591	0.00807214572501294	0.0168967707478891	0.00674820652454104	0.145810530442088	0.0102135458401989	0.757194580601222	0.308958008284857	0.555423937468275	0.727398253922306	0.410690679395901	0.135553737014541	1.35582980765737	0.421426947747487	0.00940685887771654	0.00737386365907724	0.0148792280090582	0.349025746742958	0.0267422062928322
2008214	8	0.562788400996894	0.00861879775930316	0.0160909975629204	0.00713338627542265	0.127741333816611	0.00971036290630091	0.778656508705453	0.293680773048271	0.490137425461441	0.545228304703492	0.436259876939528	0.145539695400643	0.847086903131785	0.421691723305966	0.00805546063079902	0.00803915707847437	0.0102992656580009	0.25934655811814	0.030723846699487
2008214	9	0.537541471684691	0.00944065310371144	0.0174934889908287	0.00793188366061176	0.106966502416316	0.0093960200456098	0.701167285715748	0.276308275209296	0.477967741843918	0.396657070438011	0.434118268845472	0.185758484578246	0.467141903809662	0.384387202522344	0.00673317451211497	0.00876615683310919	0.00939766075331823	0.196048650836855	0.0927877583024723
2008214	10	0.432275764506161	0.0102180361330587	0.022780029808054	0.00902788927976387	0.0934569490977381	0.00951578988587081	0.548049353771403	0.240049206615732	0.427560261432134	0.322401738088187	0.413516992323453	0.253375259168182	0.33249176255489	0.33739360599351	0.00653622602896324	0.0093837864668252	0.00844044626320294	0.172743110705492	0.173061336898621
2008214	11	0.343850372524006	0.0135537296091378	0.0271712406413992	0.0105015925234816	0.0848973312261089	0.00975261387164179	0.379806660081057	0.205729584164046	0.321959569435573	0.255951365549665	0.388230924881004	0.323246195694278	0.336223977863863	0.205811892430805	0.0063494642155964	0.00974440400134691	0.00809296092609549	0.144681015569521	0.20756698706801
2008214	12	0.321469631961161	0.0143378702431566	0.0299880181917053	0.0150977741038491	0.094145392707221	0.0114163387070593	0.294209397333035	0.19683252147508	0.257486061322467	0.198016156820367	0.352142772360517	0.182832488524157	0.33810274966618	0.158991525436712	0.00608078334576558	0.00922570097095545	0.0079308397699188	0.13624031934299	0.34452599691357
2008214	13	0.287285976525265	0.0123997954297734	0.0248233509166923	0.0186992696193575	0.0909064498560023	0.0117792071506674	0.287714397185514	0.191260354561953	0.20074881390889	0.194757488148338	0.333634191211454	0.0314489499638474	0.327305912489064	0.144420455310754	0.00576715034155639	0.0101365356475912	0.00808833177651466	0.152246568577627	0.552151814210559
2008214	14	0.311167121319946	0.0115936396230409	0.0246397651245462	0.0191582839741561	0.0929834130341221	0.0119217600983518	0.256636625386165	0.187167394690611	0.15728504712782	0.22006121739438	0.310939265448613	0.00192602885784477	0.313873801393761	0.140719597964085	0.00556091149657111	0.0105761066925928	0.00869359892086733	0.186634748629876	0.828085398068503
2008214	15	0.415810649472994	0.0116973195709028	0.0270199744217978	0.0183881201899956	0.114685373860648	0.0121422819911921	0.226411734730959	0.205010156239137	0.135491803446556	0.2266831775843	0.279884523247781	0.00139158237333212	0.304258276622852	0.137543876878145	0.00538267801913674	0.0100237288051573	0.00939566893729407	0.244600582939235	1.19180710719394
2008214	16	0.554141675721567	0.0134003679881438	0.0375780943392392	0.0168792648366771	0.15113931180556	0.0120446939842438	0.208896988170839	0.225570501225824	0.131165371613993	0.215791417341902	0.267642263585074	0.00520345645259722	0.333786847237405	0.134289573228279	0.00518466485680797	0.00894421424384699	0.0106136737360454	0.306484451520611	1.40198236884705
2008214	17	0.711613749770862	0.0153477671686806	0.0536107811987474	0.0157463482215695	0.191292474181063	0.0118656405417927	0.220897335661176	0.243931796178885	0.128779862455961	0.202910428068227	0.258188267188019	0.0273094349229757	0.40471719961692	0.131933796877674	0.00493656051901739	0.00823618493383784	0.0147765553100358	0.349191277241042	1.28812261377588
2008214	18	0.685286574507378	0.0176126756245705	0.0619353181805656	0.0147530836855869	0.219271604059434	0.0115449993347546	0.260247152327697	0.27825487471806	0.13958728252187	0.220864890379418	0.260639855919586	0.0580018719779125	0.539173094683634	0.131038570861953	0.00468363935630014	0.00775825673933377	0.0217286762053693	0.373685650214858	1.08961691130737
2008214	19	0.593598642911379	0.0213490989487695	0.0637861764841586	0.0138206088578189	0.2239980478769	0.0106307356153121	0.325826134998857	0.326964094631197	0.184052050868647	0.266765264567018	0.275776409450189	0.05725949522432	0.724506407564551	0.129445135214031	0.00451139438890751	0.00734447050955643	0.0289612323710416	0.350475159184258	0.928461385963238
2008214	20	0.787515048651702	0.02409739475287	0.0611534918184005	0.0130323502886325	0.181058222385614	0.0101344429665014	0.398534246141937	0.397636745739908	0.262154328311296	0.297223708627224	0.28859933498553	0.0411073867661484	0.820274634909597	0.124814159075816	0.00443012635556276	0.00704577107632608	0.0316113932025913	0.26242737242489	0.794847290077378
2008214	21	0.887897707099529	0.0250671108203555	0.056516817989792	0.0123824640141595	0.121909356649625	0.00971617220802146	0.472800851808589	0.530044408282723	0.427830509168285	0.298434958923407	0.305195299062876	0.0247379840739769	0.861714852508411	0.119060985225022	0.0045518749908484	0.00683115743536807	0.0360009542181397	0.234882073557108	0.820088593871467
2008214	22	0.851593179251573	0.0465103583763323	0.0549986474376913	0.0117455373323407	0.0692740982698803	0.00969839282842612	0.476456280731936	0.711156641568916	0.780224467445203	0.295079730494555	0.318660975464402	0.0127215286796402	0.854936988168152	0.113167344979428	0.00497262484352061	0.0066925338439443	0.0338711494973561	0.210279334618212	0.824540288643822
2008214	23	0.915447300567595	0.133471524249737	0.0560470546910164	0.0110759883165869	0.0358052118376332	0.0104823832894581	0.363893589967385	0.940070212369605	0.891122159543908	0.354501115632107	0.325515241918622	0.00729584095909451	0.77700074951942	0.107822473628318	0.00548843105669457	0.00663581728262917	0.0269799813501509	0.202154463290269	0.705334231877241
2008215	0	1.10606616538356	0.14730000292569	0.0557584999341338	0.0104254123210416	0.0487277487813144	0.0159329875795418	0.270367788159329	1.12022240671101	0.639230056645179	0.532766065656927	0.332617856279122	0.00635395976554478	0.627655500741579	0.103452996523819	0.0057363024842155	0.00661216047613277	0.0199177496567036	0.210537196056717	0.541087459945133
2008215	1	1.32334445425289	0.113798211804605	0.0549594002736442	0.0103927051470156	0.119095675354056	0.0216263183841459	0.249409122514014	1.09301372213731	0.523641373002611	0.727785490102678	0.332795353749106	0.00669913066425025	0.661470865204406	0.101015122133932	0.00564364010629463	0.00665154739001091	0.015031837695609	0.261565335282283	0.567355303865477
2008215	2	1.31560582894772	0.157659363238761	0.0538285837160899	0.0120546521715625	0.304047967897824	0.0235986374023218	0.233972750027992	0.831005573428045	0.573361367087309	0.718400744263165	0.321913285309847	0.0074179367337465	0.806537061347491	0.0997079379396756	0.00514838415734896	0.00662531099419589	0.0122840465719683	0.329592907756151	0.679404618185862
2008215	3	1.25201155464758	0.411408104558036	0.0523749184311355	0.0388362936687318	0.59112372058517	0.0281248766396701	0.230328481456366	0.879932988434765	0.513854556184438	0.553381758669709	0.301092903004112	0.0079064548121705	0.798860137170833	0.105545823500332	0.00452541279803626	0.00648306018119583	0.0114591271772684	0.448153721884426	0.787922361540836
2008215	4	1.0295322714291	0.647690327738897	0.0510865290489324	0.0886674008503237	0.673938486758869	0.0570011998553035	0.364953510936561	1.09650226774537	0.382594691452937	0.537917626931864	0.274815456104287	0.00811305592086632	0.671090932361086	0.116842630138551	0.00408301107046125	0.00639800659580384	0.0123201371342721	0.546359895862497	0.690761249883285
2008215	5	0.997400550462863	0.67540937172161	0.0501343886754528	0.0799698587465259	0.423771625681578	0.0745933954506615	0.454460767320766	1.22209490383538	0.338324162376314	0.901192089210512	0.232428806201664	0.00792453092661941	0.482549220022455	0.10346888476257	0.00380273760251895	0.00649026729254532	0.0134205540226643	0.456453326973193	0.553414423250915
2008215	6	1.09123539271318	0.739091420875511	0.0487498663876148	0.0778275781095263	0.104753599193377	0.0695245567231417	0.388185776651354	1.29046812943253	0.234727708018187	0.997841942665693	0.214421319226668	0.00741567156354161	0.465417563222253	0.0863491074685772	0.00380362746886062	0.00652984436941113	0.0142784579807398	0.231795380626887	0.911463892627031
2008215	7	1.13948848425554	0.882996712655194	0.0643220706713017	0.208721167527031	0.131631633263481	0.120357222945722	0.417867923847991	1.25361894591177	0.238965998536556	0.91408834615942	0.19917879031249	0.00790795601071248	0.495306034769954	0.0746788376368135	0.00442540072089218	0.00663991053109088	0.0117265500650235	0.0874683840577423	0.885756079761949
2008215	8	1.0223037684773	0.974807120487403	0.156459744542337	0.423803128878037	0.942375186386057	0.28613569469193	0.647086404479473	1.18168220996847	0.255436536227279	0.671637664223304	0.19352503507024	0.00803808883161805	0.631004534992943	0.0689018167844719	0.00593045641673514	0.0100161384845108	0.0102278182023496	0.174085776006702	0.910240717824203
2008215	9	0.862646758472248	0.927602059072154	0.192751102825664	0.453782819294937	1.3718083673663	0.509276031227911	0.60297062596963	1.09876861011131	0.348999710662613	0.545246893943483	0.193597209887871	0.00931610906930657	0.65461421835362	0.0661011352753256	0.00667533381167396	0.0142972185032509	0.0095602339445308	0.214725979126333	0.869359036991467
2008215	10	1.03676195112507	0.890811917983815	0.18577275626725	0.565311565884818	1.36209873880747	0.550537074224636	0.447520643237388	1.04238960962859	0.422888579723275	0.551652403269236	0.168088740629167	0.00913500587760616	0.581327949008019	0.0668105710027283	0.00608606948349979	0.0144868062148594	0.0087518402675101	0.243517013311094	0.790318232543177
2008215	11	2.62457900338631	0.813328471647427	0.159752104874269	0.666803970279445	1.14598558131235	0.475425670832884	0.374408105394634	1.12262045806326	0.413449102888507	0.568716743470003	0.157034149008305	0.00865763985764612	0.484086118887388	0.0649582120153695	0.00580300590351434	0.00835148608116817	0.00809788054018753	0.284963576629048	0.736800227469
2008215	12	3.60761297232943	0.860036796861826	0.143483265940571	0.684694973104431	0.984648739395719	0.423290099439505	0.380591648007216	1.13458710087634	0.43987759515197	0.530896141040404	0.162591809109878	0.00801476576656075	0.387237280530166	0.0462567769268056	0.00582658667596899	0.00216520361104808	0.0128587849750153	0.381826099417907	0.73421663103058
2008215	13	3.6780904537776	0.944584363343558	0.138480967555584	0.684151663962389	0.953666368359361	0.363086081505268	0.361026075874385	1.08326719613006	0.559430635040769	0.498776506762813	0.179363515528425	0.00941567529969704	0.429730240112838	0.0315794930780752	0.00620472544753262	0.00160872236699532	0.0960532275715335	0.454553043126948	0.58828594892673
2008215	14	2.98374644899723	0.912205759144666	0.134637337494247	0.6361811318022	0.977141163038001	0.308942801251407	0.299697921530694	1.28016593252885	0.559422567188886	0.464171632371924	0.18475166503755	0.0092198681187418	0.417330005206438	0.0353335536063302	0.00704522762797692	0.00362125985073118	0.237009868127687	0.541287049141005	0.392170279723263
2008215	15	2.45210510086116	0.697377078083214	0.135347108774657	0.57150808699852	0.980139416830116	0.3325663847324	0.244892921136485	1.93065701247038	0.506022432590633	0.679234366915354	0.174983272622716	0.00900084085791264	0.40169021195269	0.0416431379130962	0.00799062410618027	0.0323168696381867	0.307267515255576	0.759354832959001	0.334930658244605
2008215	16	2.0007903641052	0.505456730268869	0.140308720443618	0.507960714307065	0.914935528247394	0.380730101049895	0.34385574215394	1.92761103561509	0.428913620086487	1.94568439608875	0.173462297765048	0.00881861892973899	0.377562566358554	0.0412533665043044	0.00856322659489828	0.09323726482059	0.432776220232605	0.806438793785541	0.400912601069852
2008215	17	1.63826820785776	0.419772987469975	0.147406036192221	0.454482348822408	1.06197360795016	0.38458054782244	1.07059809346096	1.80280440057841	0.36870713117408	2.44212550506127	0.181010814657488	0.00822170227231831	0.362268450689717	0.0163069808622008	0.00901534444486144	0.132285250125394	0.239276157249544	0.73805170982752	0.347159361453489
2008215	18	1.92372136649774	0.351642283493652	0.14579430132025	0.408984745664236	1.38285177880232	0.35959967201128	1.58857125129136	1.59887311245969	0.332239335625644	2.38354641998109	0.194773754280774	0.00741404489004239	0.38182851533819	0.0024700640854843	0.00905656918823177	0.145012100534966	0.595557108632065	0.557887082878842	0.295591113832462
2008215	19	2.18805255901563	0.311385575858159	0.140738434295148	0.338666711853288	1.40019704705325	0.269325192538933	1.70196156828334	1.312504674016	0.346048147173082	1.99321589983985	0.216388337431712	0.00699627128297169	0.434085075774361	0.000277223583129182	0.00864367716406784	0.143348181324516	0.743562352898238	0.459913550479258	0.274876097439755
2008215	20	1.82534293833691	0.27884092692955	0.138147239041973	0.297174257808535	1.12168262695462	0.221485338217477	1.53180072129729	1.50379319144876	0.435746479609464	1.83089185127442	0.239160439645059	0.00710913253554713	0.481939850714445	7.95527586196088e-05	0.00816157403604189	0.141613920779088	0.76444952460283	0.437281632425226	0.252598620247512
2008215	21	1.77974530628638	0.253436929375505	0.136663206392784	0.23258450337144	0.958059587779362	0.213844448180865	1.33726663406866	1.9213355592164	1.13840334923932	1.83944579764064	0.224908912821341	0.00730573092842819	0.530654402722894	6.41017495357286e-05	0.0078052074549875	0.139374638028953	0.811239617744105	0.439205590409088	0.225298402773473
2008215	22	3.55024698371629	0.237194720667601	0.135241644825069	0.217506801732019	0.999363072003623	0.204404586024462	1.44728675979229	2.05781716740853	1.51507097375034	1.84672371340193	0.209274748855672	0.00803741463950928	0.538675129852141	7.04037253681878e-05	0.0074340491207917	0.138275767587216	0.915889410996212	0.488565726375541	0.1438791833026
2008215	23	3.58225033410652	0.221485370446009	0.13281564802347	0.207300363663279	1.25221745965537	0.193207040139683	1.48376980166028	2.02852327933772	1.64185773456211	1.77022346588435	0.200571756741075	0.010276141223675	0.549097745716459	7.7517214739838e-05	0.00729348986245751	0.138177463252135	0.933081897400079	0.726375446042467	0.182894721686701
2008216	0	3.46897146879237	0.192588734102279	0.130139449348791	0.20973261443764	1.18818240273833	0.194530734973794	1.39369073044846	1.88016118640104	1.73097514199254	1.61908091356783	0.320818999316888	0.014958797218316	0.80206877540462	0.000132548269686794	0.0065056429540558	0.138529583399622	1.20817612033708	1.58025754034902	0.184152599137393
2008216	1	3.20249601002659	0.173918943290593	0.127317135035376	0.216794046066336	1.07817666811834	0.192665073782289	1.3451291254967	1.25029156193884	1.57489976261432	1.42701039586325	0.402519411438984	0.0207727721711844	1.12102545411474	0.000243613914715976	0.00637889085903322	0.138863229409374	1.68871200536702	1.89518054615468	0.181230618661203
2008216	2	2.23452153538359	0.1604588495044	0.124565766140656	0.2305148709175	0.892651752972664	0.181354443972944	1.20581515889387	0.66694840539698	1.52390563618246	1.09580534468562	0.48762963793283	0.0297524144906257	1.21825067942571	0.000823003894579481	0.0072264658771436	0.138135323474501	1.76053278878347	1.90551824167118	0.329955905561909
2008216	3	2.14810271935609	0.143090618930004	0.133689418824388	0.229095450499056	0.586706079635154	0.162118279440866	0.993807881218328	0.50428311359817	1.49200736274664	0.93097514552034	0.523654517823768	0.0398536479070429	1.07557708819762	0.00311188613189095	0.0174138034227536	0.136601215343133	1.61341838876435	1.77677582860816	0.560497524951461
2008216	4	2.30840003832443	0.125430310381358	0.1324016206383	0.215727155258346	0.437016704290236	0.141815265855121	0.753203181438685	0.496853689871311	1.43577345230798	0.988456812583203	0.548949295640779	0.0387469425843235	1.00859756126871	0.00813960619821372	0.03182200476234	0.135829023596284	1.3746190151681	1.67855266054644	0.533484917651468
2008216	5	1.98590059985927	0.11366813490192	0.13144219541523	0.209144584669984	0.375705026542041	0.139729695549513	0.636374092318939	0.406496722832794	1.35115298157075	1.39583912988968	0.603489096941621	0.0335262364925184	1.12080650927827	0.0153731075291403	0.0894050306083919	0.143815838451637	1.25611940630896	1.6010503801761	0.343582138948022
2008216	6	1.47292110488796	0.111708441960748	0.143434298163394	0.223556936139643	0.304694453861368	0.143062741455848	0.756162105510769	0.37157305240382	1.1539851531829	1.97913247759052	0.589040004096571	0.0271178409869574	0.959423859351427	0.021836764636977	0.261383319737351	0.150306318443202	1.22464116941183	1.53413629799272	0.398061037766203
2008216	7	1.23795130047163	0.12995249457435	0.184012524491828	0.21083325611805	0.251980881328472	0.12802361637815	1.18951657971509	0.51312009963687	1.26815337741505	2.21781836619601	0.613819146576215	0.0227938652333821	0.743038761264002	0.0285611832048427	0.457167601610633	0.14938592695316	1.2475092320386	1.27034366442305	0.530162147195245
2008216	8	1.23672914768854	0.181722882132263	0.245518871266905	0.201624375084131	0.233870486135762	0.164636631084742	1.38753903464591	0.858921525862631	1.21801748790696	2.01087500155913	0.716566027471885	0.0189445378121734	0.494347818209048	0.0330279583203437	0.483030641376814	0.152192684986931	1.26027811033512	0.731561076320159	0.578826744938143
2008216	9	1.27779420482623	0.262087196558912	0.282663114943751	0.193010677175405	0.21574194379609	0.201216844660617	1.43896715224419	1.25922101501538	0.891725849341648	1.76760670524354	0.786762336958191	0.017755681817032	0.458154152219576	0.0440004889032602	0.499918100655699	0.159579701915023	1.16580111733222	0.59363190380167	0.283997460240339
2008216	10	0.761791161060206	0.273332241040032	0.466621476111735	0.152449094235371	0.176544961760026	0.243096884252443	1.30502683280904	1.22591165058791	1.16846941797794	1.52508279627786	0.763200297734378	0.0168255412724682	0.604106641474693	0.0642623881808323	0.461358813737012	0.151275921325455	0.786414782157524	0.851962985292397	0.134117418798613
2008216	11	1.18768077413017	0.265954129894431	0.424580389842043	0.18787155865315	0.205069000055934	0.279400735121121	1.07585337180757	1.14647236448694	1.46981501124661	1.23118958091571	0.736110520508861	0.0151464288297745	0.526772262633242	0.0949237376540616	0.380615345425123	0.154334330447146	0.437443404666411	1.69715520780662	0.114870911713331
2008216	12	2.254711346595	0.213449441356935	0.268916273897391	0.25339697632352	0.347726670021889	0.241372928329307	0.923124905693991	1.06969461749561	1.40429923237274	0.971562312383938	0.6788785289861	0.014269157297847	0.486804630740814	0.108639739497836	0.317066721866907	0.150332845675705	0.31537179973495	2.00465946804038	0.106120806121927
2008216	13	2.97967238924972	0.182530626406063	0.214673754249299	0.245450898987769	0.674067516397237	0.224857529497058	0.717291690203613	0.868565145040349	1.11516724519067	0.890713091182903	0.609418380272036	0.0137128284754894	0.660944822954973	0.120282312691053	0.27991567916609	0.249779446838139	0.246160515240234	1.81552620184103	0.0814057895012148
2008216	14	3.51130820404989	0.158416099270433	0.195952600346907	0.191776291480176	0.715409906400606	0.217879879876181	0.454392908336471	0.480002516366072	0.969176915391841	1.32256166741979	0.562492745236157	0.0132442016986547	0.565018490497035	0.136279719483043	0.252725661630146	0.286466218847807	0.23629538418847	1.51859179079175	0.0644106994097379
2008216	15	3.74980684445269	0.132594727894014	0.188996546422175	0.148070872362562	0.643416754330417	0.2058085565576	0.36099429951249	0.636842489895524	0.858649888835152	1.57743745017981	0.519290165965084	0.012647835286659	0.53354361439821	0.133179505044949	0.225429468474176	0.204751806542967	0.243118294619096	1.33337184331522	0.0659259409011995
2008216	16	2.49322027883216	0.109683050122656	0.186001212292002	0.130377041354892	0.519870861719054	0.189746528223087	0.706588127132852	1.66704804785706	0.764541538490913	1.59712574523322	0.484077518934784	0.0119057592488252	0.601507455326461	0.137747207877533	0.200600992358459	0.179216914882007	0.313413918461024	1.22609706404683	0.0854960594710828
2008216	17	1.92935770828851	0.101428204583482	0.181024578500286	0.131832504487405	0.329145216586289	0.171560960573012	1.07177049041308	1.91361833047743	0.59652035762519	1.65041182352814	0.451179669100942	0.0109252516049625	0.686052410378705	0.142558137830989	0.177317735745841	0.172221187463776	0.424375683904344	1.07880302424275	0.116621128530035
2008216	18	1.7813940889149	0.0993303240410436	0.167088055986096	0.123819130192293	0.185876714330886	0.147463548097848	1.15310720138906	1.66225000152052	0.409050038259401	1.55799893797968	0.488453838673437	0.010024711252386	0.722767855428959	0.125157312642816	0.171056291450066	0.168781723116761	0.400987980030059	0.764640848071757	0.157462253550935
2008216	19	1.63650884723003	0.087777595064066	0.156939089009695	0.11310458152956	0.140432979836705	0.122029872858702	1.14212692494359	1.30901781446368	0.410705664251424	1.3767904735073	0.542556158496531	0.00974185005926588	0.67106522689738	0.131013455230051	0.125221112963781	0.155874848105614	0.400750374708929	0.542372164798448	0.227622627549081
2008216	20	1.5917698048683	0.0727930244388353	0.152555539899802	0.102967318998227	0.137647509014305	0.092763519877251	1.09132057166069	1.03503715888453	0.61066167850567	1.30292919341211	0.593921503359403	0.00985582447607481	0.592650894460731	0.121464129771264	0.118098800032653	0.147308643828892	0.527335297289533	0.536252702340069	0.272422788436518
2008216	21	1.56434035430825	0.0674140457462487	0.150429238678274	0.0966032649929486	0.141086496917177	0.0693077999428751	1.06823533665847	0.664954720040588	1.00172088672854	1.29859498497102	0.671277641234461	0.0103518767975056	0.86894515462409	0.138127010525404	0.112998323201276	0.144702999822166	0.680429044921782	0.900880465814495	0.302122882957614
2008216	22	1.47406712889499	0.0187771712761309	0.161397466236638	0.0966155353014529	0.119338909828361	0.0746519365242272	1.0104202531183	0.504517814247015	1.04589194997602	1.36633974866993	0.772840958695423	0.0105575455699665	1.41584854873065	0.178557593300971	0.114369589453407	0.143192386375263	0.71765359185808	1.17068843267909	0.433028406729354
2008216	23	1.36309062733276	0.000871800368135871	0.166095401636112	0.115794476345351	0.107560572042756	0.0637096145545508	0.940317342868954	0.3509948146527	0.990428118282125	1.34937074766182	0.847153299422843	0.00953177958624353	1.84530023970181	0.236757565584507	0.11709773146534	0.141596268412232	0.627575946481286	1.27308837233096	0.573558486681009
2008217	0	1.31696175658149	0.000171714494459772	0.168482939300865	0.124486117351224	0.101525588339595	0.0550406709201383	0.933708859326722	0.245699241320233	0.973819435597782	1.1318605350081	0.966121763080972	0.00956904044714961	2.04655399791653	0.290590750510296	0.11580635330232	0.141971545316659	0.491340446325347	1.33266511183737	0.59458678508263
2008217	1	1.26064311763767	0.000250629827270874	0.167463026308245	0.00672122482527556	0.094101083901637	0.0555422115736936	0.946547237022093	0.231367573472926	0.964809477376719	0.910947979170936	1.03776272867622	0.0107345553798066	2.2437626837199	0.353192138178959	0.120169661959495	0.146098193827663	0.330042160719911	1.24735396681212	0.58637001542592
2008217	2	1.19121966891599	0.000668404874341512	0.166511449410236	0.000495319637847921	0.0574075982347441	0.0619096227325771	1.00670647046089	0.26254950680103	0.928911988527976	0.95173562564986	1.04446884522867	0.0112878030861676	1.93459557572728	0.40471545067518	0.125369173053781	0.147099391050019	0.181665028649218	1.16023387232094	0.598958984529809
2008217	3	1.10613047478181	0.00721518241990428	0.168200181164689	0.0033575325294989	0.0365221042974994	0.0687513963459709	1.20438549624556	0.303004976851631	0.956615378201417	0.978785450561346	1.01852154586924	0.0109076810663466	1.79728147955868	0.449009063792033	0.124465988476646	0.146855845866101	0.120955791308522	1.05247363221526	0.632637210424531
2008217	4	0.996473492923119	0.0570889690290233	0.165714309728713	0.00101795660142663	0.0400090319399341	0.0968925270004272	1.41035463429971	0.329959941318312	1.00833807593249	0.904702852643429	0.967923234059534	0.0109453844463537	1.63351060986716	0.482181765383701	0.123305987956922	0.145421857525278	0.111419365191812	0.969923308608303	0.738814222272282
2008217	5	0.871123366574506	0.130426208748322	0.174433116039413	0.000133334720155046	0.0382724521151198	0.125293981521362	1.41389811613666	0.405013766200994	1.02309267017688	0.863212072509492	0.902825037874416	0.0109952336697752	1.43355053132978	0.508916829292163	0.124215103429818	0.144167033881693	0.111990292654722	0.938379459776256	0.219070601922528
2008217	6	0.656355310394829	0.180912863921844	0.194484520032447	0.000535961124072648	0.0574694645983314	0.0955881888703213	1.221292751527	0.490842037400278	1.0197487522551	0.772772710798568	0.886027105984061	0.0113448300116046	2.07506952378967	0.54099028272966	0.154382053522878	0.153127236337241	0.042642600279393	0.921234971959956	0.00817307482871217
2008217	7	0.336268236351897	0.203570154006146	0.190234476127065	0.0203345093789585	0.112877503457621	0.00575866358135631	0.827436011177509	0.506843316364192	1.01678244235339	0.739497679696166	0.921091056718658	0.0109428967230983	1.25746947265401	0.581834754722713	0.15690734586993	0.156947773295561	0.0114923383275437	0.792679001239444	0.101228811311045
2008217	8	0.410212094204553	0.198706102958356	0.273964676986624	0.0760226925537552	0.220491150841688	0.00688124162379902	0.672772323062624	0.379319992472928	0.990676314895632	0.736887894755679	0.907484045557365	0.010961432380509	0.861357353530651	0.631497626261164	0.14592804404286	0.149489948704735	0.00721263307545151	0.686532843690619	0.771067523336887
2008217	9	2.57524566611447	0.222011597992104	0.302978100075006	0.108443299662691	0.370657727145189	0.0264167033828075	0.623293667989175	0.114651466142354	0.973651372074308	0.742749809557033	0.896387869124646	0.0108055913112831	0.683316368463586	0.657609983959218	0.127351804146552	0.171217888463296	0.0106455381328308	0.620829125256298	1.42376402497916
2008217	10	3.55833808078302	0.229210122816304	0.271805980282459	0.1284000474479	0.352637272214477	0.0295061128742275	0.575463261940904	0.318868594243143	0.962558197595057	0.657983693428333	0.920464656312819	0.0099906054678758	0.590860903365739	0.65390957464976	0.111242190296288	0.18638972065426	0.109351321770494	0.58415370595352	1.46816531199472
2008217	11	3.76532719098082	0.156408254583771	0.244307809386451	0.113908941214228	0.154872313137638	0.0276107105940775	0.56104256931127	0.870942225285705	0.952174091531359	0.43383248595592	1.02231336046548	0.00927884552207742	0.572086134462569	0.574726008887694	0.103619376936303	0.181988942091401	0.136568619747123	0.564983325621705	1.45214563777294
2008217	12	3.78124462570674	0.0618918374775012	0.243823550713255	0.133751846793519	0.484373787338982	0.0276619330768267	0.533645015507295	1.83561489881542	0.93170362577012	0.239743666533865	1.20232750261699	0.00937917015115521	0.568677839308216	0.477361055512319	0.0994336880278348	0.16822790208181	0.282268866290278	0.597383163145003	1.23242984591558
2008217	13	3.88373937107595	0.0436046703065898	0.213769501666987	0.141076038374596	1.26332103404385	0.0240856820037629	0.448973363984194	2.83223826046863	0.901063391744243	0.196568860727481	1.37324072996913	0.00968969620639046	0.51077255000534	0.316507183560572	0.0952641800085608	0.149074981958693	0.46900985565558	0.622831437439129	0.992563167709004
2008217	14	2.75378721810877	0.0800114807680347	0.200071169454411	0.100604868675043	1.97499036266231	0.023362101941271	0.270969977952416	2.90622648786381	0.838457444836821	0.309696303937254	1.52687282611298	0.0102600954083226	0.409861344395334	0.195458626612446	0.103875006295884	0.118058048583357	0.593127957657512	0.6568464218731	1.07751892908805
2008217	15	2.67607443880376	0.073673474826684	0.209781631202982	0.0929297508755518	2.55315397290243	0.0535631056734013	0.135155989995269	2.93143686931518	0.735013451040929	0.544361486255163	1.49270308534231	0.0110136550758883	0.30635261751727	0.0374594285068262	0.117045685167757	0.0964220425395085	0.779700320619833	0.690151618816303	1.20370846378323
2008217	16	3.3756780974828	0.255066809511714	0.19189991377337	0.126732928453647	2.56687816248077	0.0862753006526265	0.106129532987732	2.93834850477877	0.597297945832601	0.9354987263126	0.996883739635706	0.0124347430628846	0.215343913171519	0.0160728066144814	0.111721202244866	0.0820355500096641	0.668571659504475	0.743444597370591	1.24107852534553
2008217	17	3.1072675099627	0.522040413428108	0.17445129294721	0.111437082916838	2.46555107080535	0.0609180952221318	0.119502698871981	2.40096806466954	0.477050816090155	1.20105695366168	0.702620052601518	0.0141056525378748	0.154553493135798	0.0206142515446089	0.112359841881428	0.0510329055875215	0.629166518042546	0.7802248021512	1.01947958167393
2008217	18	2.49741164800366	0.617956178257776	0.149914800339898	0.0666129250334983	2.5194783422358	0.135500058003862	0.26267056691376	1.79412244445809	0.400614049090396	1.3515967067202	0.78850229848394	0.0150801209395242	0.120215516678497	0.0406982112713928	0.102219585043315	0.036912080319336	1.01680966122552	0.793033508135068	0.721294195252105
2008217	19	2.37993534721271	0.680542638091782	0.129067020044556	0.0866320814698383	2.26016529538893	0.244642385759512	0.438295930249234	2.14763195471318	0.353959577168184	1.47911469520742	0.928122960728062	0.0158405538550837	0.119840271022512	0.0818671154850199	0.0848392481380451	0.0110071923182783	1.57734468649896	0.77368677288169	0.566144545915227
2008217	20	1.60742204535962	0.603661494149342	0.0877035015403682	0.291508514238155	1.53655076161794	0.260575264905184	0.59819429158337	2.42539848811252	0.31338052417234	1.51161859396822	1.03199053536149	0.0166965711654775	0.149545053690058	0.0698497542723464	0.0670409425680535	0.0260577341085586	1.84098786206808	0.736328697928912	0.555713239457681
2008217	21	1.41320008690561	0.57698707757856	0.0799467995764082	0.578036884532709	1.49070010200574	0.241020473000087	0.632650189817066	2.01821998958703	0.2804207231469	1.47293922491222	1.10123537234393	0.0198063290556114	0.194146255831153	0.0623627500035994	0.0493378080161226	0.0895733555829124	1.90175473933541	0.71494346983552	0.606435548172135
2008217	22	1.59300009789852	0.644307017304859	0.0767827785559312	0.676577929726697	1.33279116063488	0.232518409315383	0.824912601210345	1.83921046217508	0.260512820751493	1.32554997698191	1.21391643931781	0.025028453592212	0.150900577500929	0.0804945105110683	0.036276943906367	0.1025456118342	2.29193434706686	0.712397176365138	0.625955247435166
2008217	23	2.18470390249127	0.731554209778116	0.0750283771026955	0.604060255427844	1.14824243660534	0.2128045404741	0.833968480559934	1.66933950478393	0.26017111412164	1.03788213832737	1.66983175447248	0.0293473506919691	0.111374669719253	0.120729873501674	0.0280541204358538	0.107720705417587	2.2968145651464	0.728220295760873	0.637745194741316
2008218	0	3.04008701306415	0.878962622939747	0.0731197595755749	0.57483562619051	1.40966563200681	0.204128357955904	0.745394393411291	1.07029593860516	0.264388218210978	0.721932526825508	1.85826620522511	0.0329299544614865	0.0955855494741226	0.115520935722442	0.01870005228631	0.112791613977047	1.94201998304883	0.73713843918142	0.602005836013895
2008218	1	3.39722648908195	1.10597558736618	0.0794590872888597	0.664194142626296	1.2414109271154	0.200425470689873	0.626775261649473	0.717485618357486	0.2678531968467	0.60483479100221	1.66670316169056	0.0347688563702594	0.0740625648371632	0.113482505556074	0.0171960616193916	0.116165459324245	1.76928034464894	0.7150525323751	0.521688354395658
2008218	2	3.46608517859287	1.29334864048809	0.0803721453872098	0.740490307514655	1.14031881489201	0.200706331332839	0.467392059823364	0.717626627132462	0.292577823279254	0.699301607877195	1.27394729445922	0.0340516483969554	0.0323411156384458	0.119610197077167	0.0261858485260229	0.129432568603049	1.60769112315921	0.675787154910372	0.486818413298788
2008218	3	3.38709353853624	1.37330350796522	0.0780139180245248	0.96343578645094	0.984541174722828	0.218432077783136	0.359584296636126	0.772171632776617	0.332473140402485	0.698045676067916	1.10692244477375	0.0353474999016297	0.00743063566473855	0.125256884356326	0.0251880999588314	0.150231391487478	1.26575240645346	0.513049061575739	0.484827133935811
2008218	4	3.35101724087599	1.21416925941842	0.0738368851917391	1.17365253816299	0.890516376117036	0.351824709288106	0.308072086666892	0.769407699558617	0.466977791961393	0.646559081309734	1.06326483389479	0.0365809118191276	0.00367056246579981	0.124360811418629	0.0565284255176118	0.166913408811455	0.810337877667222	0.263628420670381	0.473093411529893
2008218	5	3.18971560538036	1.19870992600452	0.0677659080281335	1.46908358826032	0.874377993294138	0.506066684641708	0.561275598185276	0.699386793323374	0.534587155970966	0.665817387777559	1.05019056751235	0.0354190668805316	0.00391773764050904	0.120332719071905	0.104614632421707	0.146588719821705	0.612479847664348	0.17524652116954	0.435126365012236
2008218	6	3.08797770891234	1.29261535429149	0.103057452259661	1.61990687367323	0.900141360335862	0.682664394531307	1.05531093259954	0.67101440437219	0.496537596162451	0.807813991904195	1.12502357047347	0.0352763063179386	0.00830041879012829	0.109148767686918	0.162869345989724	0.129152897338759	0.663566462495514	0.168340299483985	0.407101302275514
2008218	7	2.24901541722211	1.33233440764406	0.276980494573938	1.57323597399758	0.92535328499075	0.614986974630132	1.13811472616108	0.674903780892256	0.358973529229988	0.910733937351552	1.28707047975997	0.0388718170881113	0.0186437535636913	0.0862192960426698	0.197206637479398	0.133323162381248	1.1131151369495	0.160665134181592	0.384653573682526
2008218	8	1.34837001645712	1.27850254650773	0.191219548797403	1.43775334441357	0.874901030874365	0.607215550345403	1.04677450094381	0.602358974064615	0.296578360749454	0.874041509152396	1.96433352425466	0.0363441868907175	0.0316949488921132	0.0657605000480995	0.281267784000427	0.188799835027788	1.18329392660713	0.122117310568746	0.36644031736132
2008218	9	1.07564693368331	1.25010945276298	0.147051579006266	1.26586611744629	0.81393288990176	0.635320688602336	0.960871094788991	0.606783032556744	0.485587470511745	0.821825470494566	2.05410459303329	0.0319711482063394	0.046898741977163	0.0563154175695658	0.360874725264116	0.28119436057159	1.14173048026606	0.106626820489403	0.367548987814932
2008218	10	1.00733398640093	1.10976908758443	0.119407749695583	1.1036879223032	0.759924829018942	0.657468200503998	0.927983635406343	0.64044006952685	0.444747023692703	0.776840376718712	2.09562309637516	0.029629372099289	0.0614125364413831	0.0517565790082335	0.312253324886432	0.361500426153294	1.18198852982857	0.130705543005278	0.400388376423927
2008218	11	0.942185331344144	0.970006194406584	0.106702071035253	1.00162751800118	0.756424812447275	0.602745435898167	0.815959452782528	0.638119090219087	0.248893095654153	0.72793981027119	1.9627772787432	0.0294564139323174	0.0706186249079725	0.0478200186071275	0.304544664401235	0.400147686199748	1.24933254074124	0.211696951756601	0.495889431102714
2008218	12	0.879491226027185	0.857139008547059	0.0960481572793023	0.94908641655969	0.872161559907411	0.51806611860886	0.59053532306344	0.632267675603374	0.235556779571629	0.68415160733112	1.54803073685297	0.0279954111796816	0.072377354786148	0.0441825135093141	0.314039283208932	0.403314813185973	1.15809984130897	0.2497496059366	0.571794671817763
2008218	13	0.81986733787485	0.711950344402288	0.0865185364139396	0.97268828519566	0.957440273364346	0.461210701799202	0.477008222478036	0.583414794758792	0.29043955549305	0.719578104692628	1.024216368519	0.0257850027958697	0.0729404421210391	0.0426757284356984	0.379753908452477	0.391114367344426	0.941341240069015	0.251387548799024	0.541098313347798
2008218	14	0.747037603305341	0.515936462797551	0.0800795510984289	0.97909255976267	0.940100074329482	0.442339273874995	0.419924742280364	0.563100652011601	0.353310792005086	0.790241520716288	0.613789894352958	0.0235011902973469	0.0778357331490393	0.0406651502429447	0.453941826654172	0.387609147836128	0.784052737589896	0.260289861516156	0.477468629695951
2008218	15	0.682257000222503	0.466390498875705	0.0762921864385873	0.930699177955971	0.860277739401686	0.402941962534268	0.392739347564236	0.558501481440555	0.363883861107439	0.805925624836925	0.40323692174774	0.02184169631699	0.0805845113413999	0.0412835619821118	0.398065736188273	0.318231612701728	0.774819835845363	0.255250440792647	0.436477849653544
2008218	16	0.620707980892983	0.497828284710223	0.073452539807536	0.859176365318723	0.826181877936865	0.307982036125376	0.403534772864092	0.54344774544691	0.371783792796187	0.773037908368059	0.299716793612563	0.0206812587662555	0.0800510141210973	0.0409563572276073	0.327563809115349	0.204703767494908	0.830022493583076	0.23317594170191	0.409608009477546
2008218	17	0.581364817745676	0.554636051642381	0.0698334812135336	0.781640753316754	0.70886612401151	0.235879028519638	0.40283078775974	0.512489821030815	0.366250498950071	0.671660347114568	0.268671717970387	0.0207759370636002	0.0796225779890724	0.0364461340625311	0.267214562556847	0.158788589452411	1.00333664767214	0.213157177625486	0.424031309074802
2008218	18	0.552587144286278	0.57860291468131	0.0637975242112584	0.766996342977012	0.581719667618051	0.231776149162149	0.349954018901592	0.482816423548214	0.32900469691463	0.614243337414609	0.244733297913937	0.0207446442307861	0.0845644322890865	0.0327773487802557	0.19943828483997	0.125566449182877	1.32841050503767	0.206044290448954	0.427790512874476
2008218	19	0.531667884509503	0.574114614913905	0.0521419262066069	0.726246087976476	0.506454153959365	0.270053833563328	0.319286435784868	0.476801965790216	0.278191988535836	0.407634414185574	0.222395023428255	0.0209050915875258	0.112668549909513	0.0298522143043955	0.182462082572031	0.113540051932273	1.65295886911797	0.208464266538819	0.418762585331821
2008218	20	0.525435439704651	0.552950582434864	0.0446347712004777	0.732672737627524	0.445447972844761	0.260884868125311	0.294371415366054	0.510978548926301	0.243751055900426	0.324446633003425	0.2000731501908	0.0208002525445796	0.187559946870205	0.0288945736117152	0.174609988872442	0.112448242729797	2.11302749439803	0.222822312709697	0.398268649164808
2008218	21	0.525918262283948	0.510002353454116	0.0416730684702094	0.774253825242544	0.425801161838337	0.271359213583397	0.275070042092111	0.585308161392486	0.229199612369595	0.304549696008303	0.144259944611209	0.0210512104650485	0.305802986516116	0.0290249224164144	0.178069092739784	0.113375924798599	2.45840080623128	0.251082298339609	0.0370866903422706
2008218	22	0.531277767228638	0.469124286304536	0.0400245925826396	0.741476919248692	0.430918076804642	0.319347559759165	0.271876827499899	0.680175142529985	0.2242778509101	0.294109835457895	0.115664031091598	0.0211860682199994	0.402581493056739	0.0313721271297369	0.200082201054404	0.124805043625132	2.67562447293985	0.281375564435953	0.018165651960369
2008218	23	0.551854980769037	0.43894716264438	0.0386853202182686	0.660937789679602	0.447995379452102	0.383529899057709	0.272417222480192	0.764492866971259	0.220471534834492	0.288099305859655	0.107842493346738	0.0212670441710591	0.433409314970012	0.0385141076867298	0.235323943647693	0.155138581745263	2.53401263449566	0.31481535892146	0.010496619367816
2008219	0	0.591727055017578	0.41622390818299	0.0376491338596132	0.588523336024269	0.468820195274728	0.41677974156848	0.269055558824952	0.826703402782231	0.219080305941192	0.258174304476926	0.12146926231122	0.0221120559060647	0.427801501201007	0.0478258535486114	0.235787291014534	0.174699563787613	2.34570463692764	0.349245107682877	0.0288927377798703
2008219	1	0.670084284851831	0.38976411873652	0.0370448097479284	0.590048015712631	0.49270285098771	0.416682765149532	0.254401103635882	0.869905949299004	0.224125835498557	0.24732616546966	0.144446746815423	0.0234241980039204	0.413460158182579	0.0556722289430714	0.221354973246151	0.181463739793899	2.27949732063676	0.378732044253693	0.121400285149036
2008219	2	0.89200539075341	0.362432044936853	0.0409847944848016	0.635191381744401	0.517867286066108	0.439417627516841	0.241190289452485	0.883062033342171	0.226744117039913	0.256708937142822	0.173558297602131	0.0238932829705203	0.402841429158912	0.0605682462180751	0.1862367039607	0.175676488049833	2.20203362800944	0.403366827037262	0.179630559985333
2008219	3	1.32455562323254	0.335014756666861	0.0435211729436534	0.693137793317605	0.53805396422976	0.469355650158005	0.226514483934501	0.875281597295694	0.226938733459861	0.235039947097074	0.189286879641414	0.0241926158191007	0.408864476160316	0.0636064688157835	0.191647058069345	0.167355725734724	2.09075064483412	0.433898727473621	0.171725032183135
2008219	4	1.62334815650355	0.323298636496413	0.0426104765918308	0.754575428030039	0.554550266125218	0.430182099584142	0.217184907323996	0.854968731770556	0.21850956457949	0.229785250051905	0.1822625010713	0.0246178988153352	0.420938823488019	0.0657729994067233	0.286296066338777	0.157703203168137	1.95207032645105	0.466467511387222	0.156092344952772
2008219	5	1.68876593250513	0.300818977895525	0.0450520849661113	0.825328578370777	0.568464521257995	0.398444292327383	0.274172684479945	0.837433338368478	0.21385491913444	0.250449354606335	0.170232259288214	0.0245261577002859	0.385096884800071	0.0683951483839535	0.423310670693185	0.151639416406569	1.75266834250426	0.491448445144525	0.305284821094492
2008219	6	1.71118434907795	0.288636552003666	0.0502829325285949	1.08023045905171	0.57843271565693	0.377866102139937	0.342281482502779	0.792055118982665	0.210628537474034	0.229030444975356	0.164726746115922	0.0244950994127027	0.374920665420249	0.0738593930656603	0.532323938353527	0.341387119617562	1.57916173539922	0.513744291370849	0.798436212334563
2008219	7	1.63890809581534	0.271683659266567	0.0533758484993183	1.02292553737772	0.583767475171409	0.278978798972797	0.408504465300322	0.78692089757155	0.214757622987799	0.2740406998572	0.153558499891506	0.0250409538692531	0.443965980288396	0.0779027544918481	0.592306139798033	0.326769307399177	1.37514205794006	0.515286149431156	1.543084601626
2008219	8	1.45567031047796	0.267814564229183	0.0540831007881789	0.886379186255187	0.583963150990602	0.250161214017175	0.443151436082869	0.803332119778231	0.230102766564766	0.313719703089561	0.152408260217995	0.0241822879993344	0.695263449607324	0.0831617457429013	0.548055624061469	0.277844033996154	1.13152366493563	0.501096421491715	1.25783051764538
2008219	9	1.26747736262513	0.268017413069802	0.0565924714071124	0.857368758086763	0.585326882403407	0.246789597449678	0.368416368366873	0.859841631070537	0.255652559793564	0.425596656806645	0.155746991027846	0.0217393127661301	0.785416162266332	0.0919310989782282	0.53371743579105	0.252878648424932	0.905924852017087	0.481600631513125	0.498137944758731
2008219	10	1.07536989558423	0.252567410420182	0.0503615334152934	0.86656594975652	0.585336888251402	0.240941274047149	0.333502516174721	0.95694678619836	0.275845365919683	0.62333054058412	0.162097823214429	0.0193413563385179	0.778286266579697	0.0970619966020306	0.518953301357263	0.233962082334768	0.770108788984968	0.492669178265577	0.324440320156308
2008219	11	0.932613200068028	0.246773428305547	0.0421540775241862	0.864613617883965	0.585935116081698	0.232076375426709	0.32629377002498	1.01451162083568	0.300637846090996	0.887574692181703	0.165547183480958	0.0172064001716898	0.726914183513175	0.0958472693892761	0.500901124182175	0.213309140208983	0.671477559225702	0.424188512508976	0.239307190853697
2008219	12	0.828955086980742	0.230973184299328	0.0368217002984881	0.87257265576388	0.586636785016177	0.222916192507351	0.336408778945492	1.05900583759964	0.330251751958252	1.27163345698893	0.175153829688972	0.0159421345502475	0.625532234221749	0.089179388937567	0.495794568731502	0.195186813920883	0.612623135900136	0.378311202337998	0.193427200365092
2008219	13	0.725461346896406	0.214169338108056	0.0413614826721493	0.889463161567466	0.584832498948819	0.214888336926135	0.41445777884659	1.08434145706265	0.353452755418459	1.55712867682814	0.181946799797181	0.0150401405184644	0.542250606427929	0.107336492576284	0.499652475534969	0.178925131415648	0.60676812042669	0.355472688185664	0.160053207744375
2008219	14	0.604909097119642	0.196908573969276	0.0346298641231224	0.787496291593589	0.580706839917374	0.206069996493509	0.556362306656777	1.06986579469365	0.382632543648771	1.54127565848772	0.183761414285366	0.0147721515391856	0.513808760686658	0.182451171488538	0.488471386239832	0.163257263713075	0.600816981043314	0.355762918052704	0.131063984863364
2008219	15	0.556773891168799	0.184818986409547	0.0301039904762979	0.665541489231474	0.576182941466825	0.200397160790518	0.733341681207795	1.00864694197197	0.411570242774743	1.32815986245898	0.183394324242558	0.0147426629486813	0.509001351337399	0.232068274611017	0.454969037477208	0.150861591295435	0.62236081269923	0.37441316281735	0.108317988860537
2008219	16	0.543023167020526	0.172903000692929	0.0265398037864283	0.559020259165405	0.571299576498339	0.198300119756573	0.87864700695978	0.926797177881817	0.437513761235492	0.990053483195783	0.179987900226969	0.0149363403195474	0.497994292213157	0.192662558400177	0.425420943894546	0.142841067018751	0.649576033347672	0.408489202019234	0.0903045632215239
2008219	17	0.54490712842711	0.159362664128068	0.0237292004244615	0.482452822183213	0.567381323440115	0.198194973802693	0.905311613172952	0.856142944611485	0.451567857705865	0.704354951601185	0.175254013848519	0.0155963561344883	0.628721210319998	0.180794589335225	0.427648420248604	0.137711287870414	0.641675168788494	0.442314514641889	0.0706826027019608
2008219	18	0.634048852231853	0.143276653674665	0.0211098751037936	0.429252152465405	0.564558984047588	0.197711081111734	0.897702635347154	0.779167080161277	0.450346329541545	0.53025976651202	0.19119422075221	0.0166168931840845	0.776929391315826	0.259900096184715	0.408431968528765	0.134952733163148	0.582434322776785	0.468308285540362	0.0521294347482152
2008219	19	0.791181192091255	0.129562203285347	0.018471208962946	0.384179588422971	0.564048771663178	0.197518651404997	0.887698405509451	0.655440556215308	0.444079138817129	0.40273660398948	0.221676722933246	0.0175183047101546	0.905779688971421	0.286902841596892	0.339773654572821	0.132259429025951	0.473710914961434	0.503764546885811	0.0394552906332591
2008219	20	0.961136689878257	0.117658198011039	0.0175248405177851	0.342244503749541	0.558623728584164	0.192293347732587	0.881270999171073	0.499801568233089	0.463093000887462	0.296558704597961	0.248696925923435	0.0182574375903361	1.00385213044303	0.284722620528212	0.297228781994387	0.132227026850022	0.315552946152037	0.538718770373539	0.0336410412318551
2008219	21	1.07699082912289	0.108884821333317	0.0176624167307033	0.344433711352343	0.54766589609852	0.184751024228646	0.876001329900552	0.365774738436453	0.742153975680702	0.202451590874598	0.2684630939221	0.0189620855147411	0.849221703394632	0.259002377762272	0.277890993316387	0.132602658242401	0.209149218774653	0.590120865830066	0.0326302696746098
2008219	22	1.21552918521463	0.101822527432496	0.0178949807503695	0.389303928400595	0.538862300085837	0.175660990939651	0.864460237485872	0.308975339433591	1.25697999369043	0.167045014722856	0.278891775038057	0.019302742356063	0.408144403118896	0.27103719724886	0.253457049459095	0.134793600489695	0.175515015225419	0.688571421523848	0.0320618817219533
2008219	23	1.38192574713274	0.0970487376144068	0.0181824016834459	0.402814344256902	0.52620862547103	0.162285573481673	0.82797138692139	0.30766056373059	1.57531961139137	0.258016300005676	0.272598973962381	0.019028270633266	0.429059213596211	0.313185707697624	0.22810607760167	0.137936944890708	0.167562707441152	1.09282779530187	0.035199659289874
2008220	0	1.4078471652567	0.0938612391274608	0.0190765195434092	0.382432682825358	0.492466272007171	0.147559562267075	0.65248465587764	0.339895232216237	1.60753974408334	0.565480630651921	0.25622848422183	0.0182752974937841	0.676702380624922	0.352909549117342	0.19878506899096	0.141831075854125	0.153670968413806	1.75821829120765	0.0355082347807473
2008220	1	1.24057338288658	0.0914359754412092	0.0195809428238714	0.366575600454216	0.440732610933389	0.132348105433634	0.392904946409433	0.401998357569867	1.48895370305694	1.01578189964552	0.238824661085316	0.0173240827833681	0.27696595530575	0.41413037924225	0.173131340426849	0.144952054523522	0.134389854306274	2.04433797863384	0.0356914381565994
2008220	2	0.970473923675802	0.0904945684610451	0.020236317915128	0.348968926563368	0.412663074259546	0.118504705367988	0.308232859354781	0.443203354744216	1.4309477394011	1.0846716443961	0.231580052072995	0.0165616420556829	0.0701014394716901	0.496817517748761	0.155444655535723	0.146551212948468	0.121222028395924	2.17748659278911	0.03690910620725
2008220	3	1.01857196722558	0.0908830594097552	0.0201113937836352	0.324547281112062	0.390498723115954	0.10675915765978	0.420857354104037	0.452662903746325	1.37450007107323	0.82915917829428	0.222947405229837	0.0159500555317809	0.155935296129683	0.552676366003579	0.141663208425486	0.140971297047948	0.118410142772429	1.93356565978806	0.0367205400312999
2008220	4	0.98497016701419	0.093600058202278	0.0195072528087535	0.293094106528496	0.348318856420001	0.0954749692559999	0.705758585183921	0.460868630696908	1.24169221930087	0.583969306850247	0.205616339960088	0.0156037480718191	1.08896260238212	0.551562490184744	0.132121652447885	0.135175020525184	0.122054799761172	1.81482833654285	0.034111787184842
2008220	5	0.956316752852998	0.0954903594950731	0.023067766761364	0.253891690477717	0.30704309928759	0.0912571232432044	0.76570855505234	0.396061975009635	1.15434383595525	0.581198600581845	0.185716113471574	0.0158603256222398	1.07018308422203	0.525484893414673	0.143460362664121	0.139875666284916	0.123531572115991	1.9233069598647	0.0303567448119288
2008220	6	0.945421366402505	0.129868454233238	0.0342977602086165	0.213914652304174	0.270815014927711	0.0828782606342834	0.87812001133376	0.349250203031445	1.43162385248572	0.616228157836305	0.187873808237816	0.0179666190294083	0.478246041918958	0.354745704987208	0.191243327741968	0.130550783030251	0.115779926492284	1.61017812126027	0.0270486438525159
2008220	7	0.94464942021618	0.151619901098284	0.0427584601855945	0.173844954469342	0.24016993826675	0.0766010502511935	0.815859977722587	0.347112509169411	1.3124803986404	0.702444361986376	0.207692061741244	0.0287114593655767	0.407854458942538	0.182116251660277	0.22295068855024	0.116145136972212	0.110255630601077	1.29636561567996	0.0225032120315795
2008220	8	0.923087973887764	0.146487850397382	0.0411763885574358	0.168357337752598	0.23859318783358	0.0729425935452489	0.591028403904013	0.406730173752602	1.22143492246582	0.625134760136215	0.213537444653743	0.0415385633160172	0.525581431404465	0.0608517917934058	0.287327527900592	0.0999458656986035	0.142833803947935	1.08900451879192	0.0175839417336495
2008220	9	0.896845368915461	0.13800995725613	0.0349011482993538	0.180442137894342	0.298701849834053	0.0917407684714671	0.348900960924092	0.416581620630277	1.29790403263594	0.44483863951947	0.202259956282816	0.0535592375473904	0.699119558792438	0.0145916997750032	0.270744153783241	0.0911543799226777	0.194619504800188	1.1785400747949	0.0199205812864477
2008220	10	0.878216514706749	0.104362327726431	0.034295935665096	0.135165738037179	0.300909685442061	0.0856438566455779	0.204039399641133	0.370792434665003	1.23061365917519	0.33315169373559	0.194902067529634	0.0693042668359062	0.566604288490629	0.000934470956472591	0.253347045948385	0.0832210624768456	0.225074229052696	1.56828235091612	0.0380545670962972
2008220	11	0.792634281602545	0.078317079789429	0.09230201416401	0.10441977969715	0.227667333352456	0.0716141473796746	0.13200438345634	0.319903389433043	0.994861869229218	0.339793816071084	0.211247962904541	0.0896445741243411	0.389844844210682	0.000731105197488792	0.23956872947713	0.0715367016201106	0.235191921874256	1.7399284068614	0.0351141626618525
2008220	12	0.75384927785514	0.0634905559612526	0.118862948090492	0.0844634303877373	0.153445972335457	0.0576537589887564	0.115269103302053	0.283482962290312	0.628498452926339	0.343534072143578	0.246054207978577	0.108283046841361	0.3310852320257	0.000815687448454468	0.229658514127742	0.0627796691589449	0.221208013157419	1.71617311454229	0.0235021792756114
2008220	13	0.847375099096146	0.0492490391524051	0.118716387871667	0.0680201707762702	0.116799036530172	0.0506998743199165	0.102971214396951	0.275710221940362	0.435012212130602	0.350149635816933	0.290616120337933	0.115190028487264	0.312237922383447	0.000926185345200262	0.220964316573372	0.0551204910079304	0.182184208840279	1.13106495517641	0.0204576391993301
2008220	14	0.873136484869494	0.0425285947747063	0.10876829014873	0.0552060986170139	0.096970872770031	0.0443366799322189	0.116157514308327	0.273779496585007	0.390276433943791	0.258944461786953	0.317041853604045	0.121617439554386	0.287142608096543	0.000926145455284403	0.211112128991276	0.0512406036707776	0.143324151985599	0.644698420210787	0.0216797365971209
2008220	15	0.848560296798993	0.039004124260143	0.109652768358006	0.0467283440130468	0.0806699923279743	0.0381609505124838	0.144957979969753	0.253731170193794	0.36919094938977	0.231233807614295	0.257230275763702	0.149008064424983	0.26188500242265	0.000656148040132453	0.199992170724139	0.0484574660285913	0.118947428237494	0.505726667245662	0.0241955049120817
2008220	16	0.536373074500815	0.037212633007336	0.101205298116092	0.0411022682049781	0.0678522673320023	0.0355894892232206	0.147633648733291	0.231390348392269	0.348569113631886	0.205377557096738	0.28466900952685	0.191517655372753	0.214311613420068	0.000424119432315231	0.189081780418488	0.0468423057271507	0.10248111118422	0.481323932747091	0.0346564826132217
2008220	17	0.232454748854796	0.0325281337989978	0.0901883503460233	0.0370733228453888	0.0611005097274159	0.0337771092530311	0.12131900953158	0.223757222951495	0.314586576147229	0.172955050770569	0.420030834089352	0.218602776024599	0.194022009335391	0.000300392770849796	0.180337521762433	0.0457007331987093	0.0896014069764719	0.425600385654257	0.0577526880624083
2008220	18	0.211207517201458	0.019586368311038	0.0609961908398334	0.0353141715627446	0.0566939527616409	0.0317145009476068	0.0903787650054853	0.23332779491307	0.273847473019741	0.158511884330754	0.645411565801	0.210736973036903	0.188971927103869	0.000240664507104231	0.159607355242095	0.0475213067383818	0.0808947199007221	0.392474480543227	0.0827762363570939
2008220	19	0.377754722185832	0.0154452539062081	0.0336548131965485	0.0318300041206552	0.0536161000496442	0.0292508664488777	0.0522014069822545	0.0970995197175989	0.244148025966171	0.152471881571193	0.878923826532754	0.199453839428855	0.20400005154319	0.000255662427634987	0.136553542387795	0.0493018603810012	0.0832672095716276	0.331031063552058	0.100219354874223
2008220	20	0.305332004868378	0.0150686865048448	0.0201903792586243	0.030760173396118	0.0531018251264727	0.0247915261936973	0.0177730982080511	0.116535707383291	0.184049917144127	0.133088245311623	1.27691329583558	0.186732786730474	0.203915482977676	0.000377465465473495	0.112300379779252	0.051493872468141	0.0916686453274188	0.233249669424921	0.152427914927966
2008220	21	0.372458099932887	0.0162274854962975	0.00701369829948856	0.0317496153522661	0.048567106644888	0.0193639607656606	0.00314734814667654	0.163211790392901	0.171723607497899	0.122986325849237	2.11314404324029	0.15416726399995	0.197205359890179	0.000581912281070644	0.0923840363406853	0.0527497329258111	0.0915373965641468	0.157866243918891	0.293038263262986
2008220	22	0.267598944696828	0.0186427116478957	0.00717044898094273	0.0294790790815247	0.0410561244684711	0.0169633320072262	0.000853693481120661	0.157244415407875	0.213643438799724	0.120389408320463	2.21823595224459	0.117950511732835	0.210499370985989	0.000918339300120641	0.0835730361515196	0.0534871246759294	0.0872970241669842	0.15965824966149	0.494717723747076
2008220	23	0.435883055914979	0.0205924586178675	0.0209900340471249	0.0218914448012593	0.0348176070964302	0.0213054421861843	0.000294265496699601	0.129461983287687	0.572734816325074	0.110638762734892	2.19841951636995	0.0993076287074527	0.200542684357604	0.00146579696700261	0.0760369371986537	0.0576076389553492	0.0845808757954821	0.182920804033478	0.710627692040954
2008221	0	0.652106759264354	0.0144856462542479	0.0813809431177013	0.0169453336839986	0.0396707642069573	0.0361041933864812	0.00150732593100136	0.150170574636122	0.363246652520374	0.0827723782114569	2.00011817610016	0.102910613918827	0.0577479002345581	0.00191276376837921	0.0716321015376089	0.0597123608143618	0.0775710726643455	0.241457623183328	0.833632305326049
2008221	1	0.511133341949361	0.00958710773700881	0.12747799738181	0.0199823239004018	0.0535309094315852	0.0304833069280575	0.0241969063099561	0.143041955715014	0.885661170084753	0.017542969679277	1.72737523971109	0.0932219414265383	0.0165726800207695	0.00210439562507676	0.0703923113189972	0.0596857296429334	0.0680434204540075	0.0967941313359695	0.919955809829751
2008221	2	0.436828951313214	0.032352137831827	0.16968274993855	0.017174957128381	0.0766129991998293	0.0156900020522495	0.0422742958408993	0.164738415528857	1.37338123616378	0.00175080806549796	1.73440302062676	0.0910293610493622	0.0130145110574769	0.00209748301912267	0.0700858127671382	0.0592821104829516	0.066460511129141	0.0368440037683235	1.02682618163665
2008221	3	0.79763588686328	0.0793786985474326	0.327950143576722	0.0171029662176887	0.0842098917331368	0.0104750972957854	0.0412755290974331	0.217474019409682	0.86040418334309	0.00143219488463678	1.59339379272778	0.0844319652120179	0.00951940571787578	0.00210575432779413	0.0677584808693308	0.0586806604406484	0.104404769965369	0.831568707856236	1.13393049862253
2008221	4	2.0052715050137	0.128507234390801	0.662297349691014	0.0136813019181728	0.0845473740436273	0.00852575339170498	0.0461339630149949	0.514534737320239	0.537049790571056	0.00244311885390031	1.15640324322369	0.150161232827625	0.00505932348669748	0.00208729461377737	0.0607838532380365	0.0583623128025656	0.11555760496359	0.770780155946884	1.07746478937972
2008221	5	3.4821164868193	0.197868855404307	0.792115060903	0.0138980360212949	0.101431942074881	0.0113151580038655	0.0577281661199023	0.896137527543547	0.286695984442626	0.00556634199747318	0.876194359644718	0.265587566491019	0.00620274114028118	0.00194773038915085	0.048289721536512	0.0578565334073226	0.0679693636121691	0.541647616890267	0.950990309970276
2008221	6	3.62667239568029	0.360300661331677	0.729006914250655	0.0374585069358423	0.185693619358651	0.0297244895774764	0.0837451696782494	0.968348383376792	0.178513841021079	0.00539349105128586	0.943601167158266	0.406523796689628	0.013394605150391	0.00173427311596128	0.0458287808578617	0.0569496568009582	0.0574997051622716	0.454006993153941	0.708634672323836
2008221	7	3.29783821816251	0.503865475772671	0.632008879963682	0.0831000341745112	0.48865948809477	0.0691371700860309	0.128860993586923	0.887408048414088	0.188438155791421	0.0218193148734386	1.46118010594844	0.553827162891479	0.0200742928656439	0.00209826788326379	0.0613371646987131	0.0512966120165349	0.0542735873342335	0.441860093693213	0.57100947602216
2008221	8	2.63050768085843	0.514671946499279	0.493062102756488	0.136281303301768	0.630551862024166	0.0826757324156009	0.00186321940004257	1.18797131507504	0.260559384899964	0.170609317863863	2.31870222541592	0.65332399393697	0.0249502008633086	0.0051629449657349	0.0763628418226997	0.0442256131944629	0.047986588187859	0.402037219009018	0.661450550927205
2008221	9	2.22750798383087	0.446154688617018	0.34702272509198	0.198183305172767	0.597066105306607	0.0570308643939173	0.00202970342724452	1.3751712995741	0.323326061942023	0.503964519416894	3.2244291055335	0.635084752536447	0.0216846948337218	0.0094192741900366	0.0898140901681138	0.0391647529127432	0.0466277889410052	0.388535612040448	0.85357910941665
2008221	10	2.02421120663915	0.355903032680808	0.306550706101149	0.243766352978066	0.718474170553029	0.0543438518225841	0.0308392515762725	1.30397303544163	0.291322814015536	1.07093580407023	3.46680477718093	0.551691618610221	0.0161416868040859	0.0121399665280331	0.0849059816841281	0.0325709616681617	0.047659850991291	0.317671282370547	0.707521119057597
2008221	11	1.87854785851988	0.240480443812432	0.316097761742382	0.305866506196915	0.89282784363049	0.302873159215709	0.14189315898048	1.07583148678618	0.576230648459568	1.51848939563119	4.29267607888039	0.42047130627001	0.0145658366868453	0.0184193218020671	0.0779457588452504	0.0167345646404275	0.0342598279494879	0.248901808202301	1.84108986649054
2008221	12	2.72466029750809	0.152566812234684	0.285012634079307	0.329697478894537	0.906560517283169	0.463638671822485	0.491509095561509	0.425216698965483	1.42200880673046	1.63385669113094	4.78318627830177	0.310433796975925	0.0144368360688206	0.0262881661474577	0.0723724103189716	0.00870344437756833	0.031445108498562	0.44571968588073	7.00611159103868
2008221	13	2.95905508645101	0.130270354601572	0.211821705539837	0.289618282553062	1.01072718514894	0.350164213968277	0.810297324486696	0.298250605009155	1.0759053426659	1.59106339907367	4.17916859962584	0.19992605138352	0.0151749713129017	0.0295364117997569	0.074337302236116	0.00975950885802352	0.0583017302920432	0.481883802609689	9.55661929355491
2008221	14	2.13510113869716	0.190423246566784	0.0778970247855423	0.218586693115247	0.865095081527283	0.194335702538225	0.968702308439721	0.272889029946694	1.32347450223936	1.13063159358598	3.9062891801771	0.157596411783488	0.0171996582214637	0.0287336338048616	0.0792302130682535	0.0271848896784416	0.084983753910246	0.463130950075329	8.65392236930504
2008221	15	3.22316752141779	0.285375750024913	0.0267360231334576	0.153521171622027	0.505695708826114	0.0518396804715978	1.31578180522476	0.3834542199728	1.66937064785703	0.673148094379268	2.55851852934921	0.148151522528605	0.018033569113751	0.0273952389729207	0.076075380564327	0.135586112460901	0.110906811115314	0.373004781056298	8.52406874415491
2008221	16	5.94530279170347	0.287792522167118	0.0201811819276755	0.112616216515709	0.658888456213515	0.0271864274455718	1.35581298338888	0.56910553036388	1.47981767305893	0.457506702734753	1.14230741483752	0.116154499665382	0.0179452540761106	0.0258200834876326	0.0697955089630879	0.23101271250039	0.108543849606352	0.329876561841795	7.58182182402306
2008221	17	8.21082878419257	0.516277885788596	0.039792068301198	0.121953115904973	0.654690766008656	0.0607016607556324	1.26537131591562	0.673136238183742	1.40256300801705	0.600388883802128	1.08404639578079	0.0899184595457485	0.018006940472641	0.0289303393765311	0.0630981089111676	0.209580824310557	0.134780125268724	0.204713320028263	6.52226957448855
2008221	18	10.1776455396147	0.721571308415689	0.0790660236841585	0.145654249530464	0.690098373218427	0.073415578688062	0.853914751902207	0.671183234665383	1.27715677909656	2.61069323706425	0.984296640964318	0.0694304424445911	0.0185066306519065	0.0510902455587437	0.0617281326419814	0.183581787980215	0.21063762624346	0.220806442370071	5.41792926002532
2008221	19	11.2549036315177	0.463719696757253	0.119882021735991	0.117438270994495	0.737316076073815	0.062913814378018	0.450070439478155	0.739941531835826	1.25206025627889	4.94271847281269	0.817773770742525	0.032700467843512	0.0245066265943152	0.0815830258035362	0.0607467922786952	0.196029219081836	0.323134954848298	0.249679697335404	5.11200459370415
2008221	20	12.2504756516408	0.857332542383021	0.135787486101413	0.136758205788268	0.750985676095584	0.104553099171963	0.447634350049867	0.804843268973653	1.41601430804849	5.55218945582287	0.804392359611734	0.0301103286355551	0.0400316086435819	0.114760925150219	0.0559805881813062	0.191415822725087	0.563496329623436	0.279342363334181	4.99038108438261
2008221	21	12.4450176021476	2.57968041076554	0.137789074725918	0.242016537260677	0.915685823604015	0.365874959891264	1.24196943972142	0.546636794947863	1.44177548724444	5.4808069422565	0.850600969396307	0.0732365891587624	0.0600806721302998	0.154064707715339	0.0300599869668096	0.118264282404011	1.01151903255556	0.290517360864771	4.77007929105231
2008221	22	12.0839196171043	4.62460972699181	0.127428892381266	0.378266335058275	1.06692343794668	0.543722362433865	1.79595279296808	0.521336354718562	1.35052883173744	5.47354756378344	0.812374188956497	0.147078016692684	0.0733222586989069	0.17604939956537	0.0203811542003782	0.0558755648489029	1.47582443126695	0.294914321205387	4.37294806708556
2008221	23	12.2746065977197	5.23470998280138	0.117638504845125	0.358725281071627	0.989438192194628	0.387012112915791	1.94525891791439	2.2108802855735	1.40807392319664	6.26699428510836	0.795567183547129	0.235275703636779	0.088847546376403	0.177492135011321	0.00780634209372529	0.0343350835581074	1.62163928897677	0.228733279588926	3.93231311819416
2008222	0	12.7365525370014	5.52208175409152	0.116700225682776	0.325895742305823	0.670574042778261	0.668526472355386	2.02661131278674	3.7171812967831	1.06199235882244	8.30915892339809	0.504302718768681	0.362097735771243	0.107364668452587	0.169520335472922	0.00572992001960137	0.0322624424963721	1.70975324197023	0.216437423650948	3.72356967075853
2008222	1	12.1998347489488	5.81576687632599	0.121971388171192	0.343156257018191	0.540922856649355	1.66564400553711	1.98450461296908	4.35418727697013	0.742656691496064	8.26854341582798	0.443979274935522	0.410384873859832	0.123026231057248	0.158741044395543	0.0284779462596462	0.0314568223816114	1.44003266939375	0.223348273915866	3.7035301364377
2008222	2	11.9921994718403	5.76455231822337	0.158949683029586	0.354958899967872	0.939578180405557	2.25197839367969	2.85619227414651	4.86410164316779	0.754425572115454	9.46328118209643	1.15623134051267	0.459765115541323	0.146132575354296	0.153057066761422	0.119766141349269	0.122828756475622	1.22103708551282	0.236288907531361	3.31523720888524
2008222	3	11.4878320756861	5.55445985348334	0.149831186703222	0.981866990427604	1.80344381292853	2.93172401870291	3.60896406198603	5.2893049602744	0.770940565220328	9.49143987602131	1.45079244973591	0.496144870468175	0.177416016025068	0.146549751448202	0.188218228583556	0.287461792812693	1.21396889572055	0.257990202395447	2.64416409946674
2008222	4	10.8073307158127	5.21457199039931	0.122241537901079	2.21242083200309	2.66185890556071	3.15156047440837	4.60985454034736	5.26608508462764	0.730159652198683	8.81407606527162	1.29501870198486	0.458062404973607	0.224401462389031	0.145758593787164	0.176732497409593	0.187603745928584	1.15521912039948	0.270683490454344	2.01437633173493
2008222	5	9.77292592047226	4.62572513281464	0.103938493009895	2.91806195658833	3.15801303324166	3.09241671111366	5.47473934818011	5.80437769725638	0.665906776605312	7.82495627599193	1.34912831056711	0.436078367750276	0.270488420994818	0.145824869817101	0.146456655209831	0.120516581873932	1.00833216170147	0.289462674700672	1.63133962690784
2008222	6	8.70119436739181	3.75093767529779	0.234209960025461	3.05393430011628	3.10992995809072	3.19234711820405	5.65100399683186	6.19307614176149	0.598172905912038	6.6807428875345	1.27166474946672	0.400866330660388	0.290858078112078	0.150030059933996	0.078684404909106	0.0919432552202999	0.91657733377061	0.297185975361733	1.37452729953826
2008222	7	8.00461706712041	2.81643219061601	0.351856645398347	2.9241122419716	3.18704380236929	2.95734499770951	5.24632071448515	5.91113972343833	0.557573006357782	6.25839684935314	1.27932520416787	0.554770017716641	0.276337040146855	0.140656844784764	0.0365832933284461	0.217012608865187	0.786212689245986	0.307454240808396	1.01358247892724
2008222	8	7.68938236145715	2.53734110978566	0.313307899989368	3.01805470742801	3.88036035228239	2.73356973194343	4.95893559488051	5.07260414967269	0.668801869620035	5.85771079320427	1.46110049183386	0.75285228190828	0.315399954858689	0.117513049515186	0.0380032409353748	0.510667950119694	0.657659800922384	0.319293060857139	0.573296537032032
2008222	9	6.85493444760677	2.51109657692258	0.25964643427371	3.11821397274205	4.56629967545404	2.51893170388422	4.4353290095949	4.32615801426403	1.49051668241227	5.28868028301305	1.8031931887001	0.849102633440241	0.285636921423869	0.10011616031068	0.064588999081119	0.9260943141212	0.527251515129342	0.341738487606663	0.347953768884332
2008222	10	6.11954445898585	2.21140888997099	0.222399287053312	3.14969061884048	4.18650308698334	2.14342704674939	3.93139531095264	3.87220922029497	3.14814397553396	5.04570690874118	2.06893456249366	0.887551219503974	0.330860472078266	0.0927445812914636	0.0935384582436233	1.1538616821413	0.367475714351077	0.334213941780228	0.306956123630997
2008222	11	5.56221959745175	1.97996432759825	0.210214501429477	3.19722668087977	3.5842891743688	2.02225473359611	3.75138646975886	3.80326152216214	4.32040429969142	4.8426271212882	2.04392092073451	0.766710714308085	0.403969758605539	0.086484861047345	0.124223002900452	1.20762232723466	0.298672258045379	1.1045187905799	0.351589756544664
2008222	12	5.30331367222039	1.58877316629281	0.198300041584906	3.31979944204738	3.20378318073359	1.47117689015437	3.387317347784	4.13082779206752	4.21623794126381	4.53100252207536	1.65784778076514	0.51624790371237	0.358287037459059	0.0784172016514996	0.203079420509652	1.16073656906329	0.296154347721241	3.4917811001969	0.499603421683882
2008222	13	4.91473025543541	1.17660374203662	0.183035984110208	3.09132317916373	3.21841077248786	0.796102352794928	3.0779524290404	4.11251247444596	4.2673063401547	3.83566532609293	1.39661657133091	0.187882046318441	0.253100044840172	0.0719180942964655	0.287291665676764	1.08133000620181	0.336610408677667	3.8169456356267	0.505586635191063
2008222	14	3.89465068245933	0.951615566121176	0.178960122357586	2.49874370357385	3.99952225609215	0.582835044871226	2.91351787922577	3.98879280487985	4.29859951329886	2.30357447428172	1.23167376997824	0.00655896422136317	0.174825116603767	0.0663274999707153	0.324151732266151	1.02368592971386	0.618777199246066	3.89052410103271	0.457280097846549
2008222	15	2.90865993086044	0.789160416608944	0.165068183904857	2.07181832615997	4.15243587013279	0.477981103240229	2.06301977604965	3.779096566598	3.98210507620053	2.08941693132107	1.03740516748058	0.000230518516758202	0.122115261101415	0.0613936959697793	0.302594776590074	1.10803832317522	1.71971514384024	3.84850185739437	0.389478823615341
2008222	16	2.5096936484639	0.605875945712771	0.147651442785496	1.68210277544009	3.91755355862074	0.398669017449661	1.44721054329341	3.54117901335553	3.76203628947701	2.68526846840577	0.866698837897875	0.000322342663460478	0.0887295209537748	0.0576754758622372	0.259278970602008	1.07075456082923	2.69061685000109	3.76765607062002	0.283895496335474
2008222	17	2.61199861254786	0.456569571192113	0.125436827034228	1.39037177377406	3.6519011746497	0.330665508849624	1.37013273874423	3.457928327373	3.23477072232344	2.67109434897279	0.726787766880106	0.0144647770285745	0.075349581908316	0.0545558586680128	0.221988252205402	0.861033470256447	2.74904252841994	4.23261094069687	0.220301143219075
2008222	18	3.08093541095554	0.403682851844997	0.116867918359601	1.07024029553323	3.37737721575752	0.287375729918982	1.84085304127299	3.30062739598497	2.64300599608761	1.86449975566519	0.427843166809273	0.074004786327474	0.0722371732309193	0.051628827571228	0.19206951215895	0.623782335703202	2.46282946368562	4.5013973711699	0.17436916162845
2008222	19	1.32314292702879	0.369228352974395	0.129653031515113	0.824280876245885	3.18620694373016	0.25837848330975	1.4709528953788	2.57648952308675	1.79811961717725	1.61907540509429	0.281160386515761	0.101425941309115	0.0860106529245426	0.0490601077559802	0.162849558481606	0.434531088362175	1.93681197681438	4.47431713384704	0.137488237100292
2008222	20	0.814156698282861	0.32912939617367	0.147934540173724	0.633284814216367	3.11534134647756	0.268396108197429	1.22707112555914	1.89955910799615	1.56236371421356	1.68854078020644	0.241078091399658	0.130171676889868	0.138035636926683	0.0473666255926357	0.144884790518103	0.29955198629232	1.71273771922947	3.77026165183258	0.116701353127011
2008222	21	2.38192816679307	0.257535967307191	0.155053345287763	0.498898674554796	2.82403077399869	0.287017394681025	1.37758555601968	1.76615241971131	2.07273910405867	2.42754952205999	0.196778803022775	0.13897797243972	0.288736402039257	0.0467335339746857	0.142889267137556	0.227930373731439	1.677192960598	2.42519277722697	0.108010515955899
2008222	22	5.76357272998157	0.181270596671555	0.15011173550481	0.410256043877267	2.30714880968998	0.299598065718343	1.79038355283965	1.3704250302892	2.20908168529541	2.27419939178796	0.166711037651243	0.127587956134019	0.585671287584127	0.0465822830297553	0.173475250352016	0.215940479332633	1.61143527166001	2.18740797177015	0.104241350914903
2008222	23	4.74091411579271	0.130911877216011	0.135383682586388	0.321055058178459	1.69081825055792	0.295518053284713	1.47892043860277	0.548770379893347	1.74366048142387	1.73822396119451	0.163582934372056	0.108316029447002	0.587933007488596	0.0454186085171338	0.223997264949889	0.208835884555665	1.60902340002073	2.8029112625578	0.114315570781421
2008223	0	2.9225956779421	0.11219933302263	0.115957300170946	0.270764808204491	1.02352853229339	0.285062317039653	0.825369424808702	0.355107525942303	1.58866009153689	0.791177325701077	0.18354003758103	0.0875347014024072	0.519326856201537	0.0428106896998438	0.262001057182865	0.203747361210501	1.55388504970688	2.49702915423647	0.140799299908694
2008223	1	3.38344765291181	0.103393689769958	0.0972141292786451	0.265460062067921	0.548680316947701	0.25204401455009	1.53671769459121	0.356361694696756	2.050893960076	0.561843597129407	0.194435432572826	0.0731411451963889	0.442232887473761	0.0403172619874648	0.273036835080712	0.200156545311448	1.49254609944409	1.67237514096282	0.14779802561657
2008223	2	5.28339512416477	0.125877225486287	0.0820418623527905	0.245147494470243	0.306240982090797	0.229058411332235	1.58479105091549	0.511578211647805	1.9675008498061	0.459071527594206	0.194587336379612	0.0598802804950818	0.252520789567768	0.039796107734708	0.282894137297575	0.197892725251287	1.52510751591658	1.7527221046952	0.148461370597542
2008223	3	9.78742818004009	0.195841840582994	0.0738701858220163	0.184025769370437	0.233569681181805	0.235406841348813	0.451475588384194	0.536190008231813	1.0449239020918	0.405204478334903	0.166638170154765	0.0345945634984653	0.118168251062336	0.0357279873177828	0.291187335337211	0.196915489452871	1.76125635042268	1.93550713673547	0.144514888444873
2008223	4	8.99907399643838	0.224934318872688	0.0694626622228827	0.14823243994097	0.183852431712278	0.2507591855776	0.137746636059213	0.531377546715956	1.01653359598955	0.0826101304048335	0.144730244058422	0.0372667952398401	0.0309686404852185	0.0308590550687149	0.29149088262287	0.203820947479081	2.02020526205742	0.844608258510868	0.140198358618347
2008223	5	8.08440240098543	0.215154034374815	0.0689563583908843	0.138829213039967	0.146846255919081	0.240154512100004	0.110022585422752	0.630304667826165	0.927444212114546	0.506358956718288	0.12337181180637	0.0667808487231033	0.00318342915032467	0.0273630509770607	0.238158867419875	0.208779335073935	1.77335073907948	0.643234604456798	0.133814936906785
2008223	6	6.03411456139794	0.193062765995354	0.0684471617642181	0.152353104068888	0.143529699862983	0.230058372634989	0.374183187822919	0.686570028225662	0.747730129172368	5.22201754349052	0.107251815648383	0.091612799639834	0.00283527247054674	0.0255629630733803	0.199131056781669	0.244996360032893	1.19008171698775	0.589008037720794	0.134541722290191
2008223	7	1.3788093900892	0.180514041758559	0.0607816734216546	0.182878072146602	0.175064713602767	0.255536794421445	2.00538233740498	0.674344280797524	0.636902057591136	7.33313703635141	0.0885964305388094	0.13314071430988	0.00560314787540453	0.0311969684848409	0.222169102748322	0.273877206549469	0.56921662181719	1.0111839205126	0.150060300548589
2008223	8	5.5618957541579	0.167437791640344	0.0567477878419091	0.210905678811257	0.240744451740551	0.25714646080426	3.31813546654754	0.850964651121801	1.87243591321279	9.98611216435202	0.0737080899104352	0.154352778150304	0.00535521212498975	0.0567183742918344	0.338703706585651	0.252815692593541	0.322180782675915	1.09465921225516	0.584471617476269
2008223	9	8.53740630609205	0.159170796305991	0.0679234217334282	0.21927207196212	0.27860061913512	0.223750247776636	4.5177629575873	0.863231496495583	3.44574538918881	8.43461713750883	0.066412958451072	0.151681461628162	0.00310900131920679	0.114073907070144	0.754154189072697	0.229119060890662	0.248898724581396	2.00876630461419	1.2296388992484
2008223	10	6.04366224587719	0.152164170744865	0.0785397242977995	0.220929378890282	0.284042837093261	0.186136075580096	4.60668468997504	0.710462751021961	4.44937101739963	5.79664733501757	0.0660186477302987	0.160341163611434	0.00684539691139877	0.152158868451905	0.947312178510561	0.202661152463852	0.234444386328558	3.63721560433942	0.784316554462146
2008223	11	5.27260493385395	0.149912477843937	0.0768589819107496	0.221020975929265	0.279602247144349	0.149615420133631	3.36315098283696	0.641434139940785	4.55667521475003	4.51333488952212	0.120000646818182	0.169597551041001	0.0144705291111492	0.167486353668734	0.939181390340859	0.175283705146715	0.214791666200078	3.31309948763507	0.266029582037424
2008223	12	5.1362404097753	0.147294983006098	0.0706183410360547	0.211787382299493	0.266751812828481	0.116895569327033	2.22418332115113	0.655792274738269	3.92347295844541	1.47964402315727	0.290408923781665	0.158261079832942	0.0140031843037528	0.0636189577335425	0.865940511527451	0.151623709730735	0.174379780204344	5.57168719095673	0.081869151216865
2008223	13	3.72970026983705	0.138141874678939	0.0642448903093618	0.18908606415437	0.275654154938361	0.0964290566069607	0.346251198699503	0.582512657003273	4.18347017592211	0.821973716047397	0.444190410077101	0.152662155397006	0.0105983067713702	0.0346885886116209	0.799771284903628	0.131534096384171	0.144302085494227	5.51575981787166	0.185924426088129
2008223	14	3.64906191318521	0.123852661440079	0.060432439154945	0.170586618833229	0.247011976842921	0.0847107759807463	0.0262980765289076	0.567550410592041	3.8294617890224	2.32828907489367	0.475189778268604	0.217650554672614	0.0265611204367742	0.0110109103505501	0.735147335532581	0.115807480622226	0.125943896846846	4.56794416054751	0.289714086300553
2008223	15	3.50828228899967	0.109781663302365	0.0585936397699913	0.15174970284403	0.221109259406558	0.0792006678168714	0.120648693619805	0.788995369355219	2.97544393240057	4.37552283585747	0.358859152420242	0.240585010270545	0.0878499497256247	0.00239589987605009	0.679615306867041	0.106084184459463	0.124666864821001	2.90719377917638	0.730431545701774
2008223	16	2.39579400389882	0.100454787579311	0.0594672826747475	0.130980165566202	0.242454292198456	0.0771351107322556	2.11025159531356	1.11635260756655	1.04886441954005	4.90613861208874	0.346005227914909	0.217294947697835	0.153535520811615	0.00139177604327056	0.63773233307608	0.0999199140949343	0.130103589662878	1.02536372031251	0.998614340024095
2008223	17	2.99682832936079	0.0911391403259579	0.0604052331131567	0.118195091844131	0.404754144759327	0.0781591607996949	2.9089811784309	1.57184316191838	0.901965007730307	4.70459395541199	0.481883509465879	0.0867821014515024	0.357992304897945	0.00165736991507944	0.624580122449408	0.0962482388687861	0.137327462645041	0.685753983370662	0.863145314883062
2008223	18	4.28375715240344	0.0855991627842815	0.0614445695766246	0.111832719546137	0.274801516375704	0.0793608512894912	2.93909839741027	1.362359306019	1.97416742969168	4.13821428984477	0.710732535670237	0.087343436726669	0.404683950801058	0.00282471084312394	0.570881914068152	0.0905876246468513	0.139962060357196	1.4526933389764	0.765859810285294
2008223	19	3.76042438870604	0.0812639817230559	0.0599345861315738	0.110013734398659	0.154347657552998	0.0803697943864642	2.43148396290826	1.35962724104668	2.52214338566696	3.69286413487584	0.928165129133714	0.290669201147681	0.64402707743145	0.00358413242924116	0.48555951637035	0.0875451924379606	0.133645382853779	3.18928829909482	1.11416848179105
2008223	20	3.8509573953533	0.0827787291128015	0.0593282282617452	0.100348316295444	0.237864534274635	0.079372972022796	2.0636549451109	1.3011163459531	2.45428040883232	3.73744408607453	0.913977488886378	0.650980189256186	1.07608320043081	0.00333668059187859	0.461634507961058	0.0857598838980545	0.12835584989399	3.42566746737997	2.08244078989167
2008223	21	4.80851686506764	0.103445343573721	0.0590672806800997	0.087653722794085	0.518668490371973	0.0783083267962957	2.48706936521563	1.24275098502113	1.78606068128495	4.07795328696715	0.787722371251497	0.844975624433552	1.37540430512515	0.00298487233916192	0.453755591335786	0.0852619097572504	0.123548116207962	3.31578708555366	3.03522256939362
2008223	22	5.22634776241557	0.388036532934724	0.0585117280343872	0.0875108305921829	0.642967279918312	0.0772627799318204	2.78787124975972	1.34032043059819	1.55243233251741	3.28239207435903	0.632811224005348	0.870949813586281	1.36276196603587	0.00256547485171511	0.43314424216547	0.0848522435825776	0.116026216890991	3.01930589460492	3.1583427987121
2008223	23	6.41293139432788	0.522934134089274	0.0580732786698857	0.0842983187617613	0.595312763540042	0.0818629573201601	2.60100604714289	1.27920184957159	2.09650882898737	3.54908917370061	0.825826360769585	0.864909356694995	1.32893766737902	0.00216672258915562	0.447522393002699	0.0845780758980269	0.109246636589461	2.77750528392238	2.88347677825235
2008224	0	6.87465194956595	0.493288113295457	0.0577990083328703	0.0732635439336811	0.556204242796748	0.0910091369964743	3.1993520958531	0.95045329111013	2.3284898680886	4.37677169902929	1.83299213546337	0.872301462415102	1.11478581129184	0.00292060043159962	0.423786237815855	0.0834281721189629	0.0983527934928608	2.77498944947248	2.54510631535557
2008224	1	6.35834801798114	0.353805117226302	0.0579171982990671	0.0797818046164137	0.506898764008126	0.0960598683211207	3.0610797244709	0.97219285701485	2.21982427596106	4.296373396923	1.68770303985998	0.859407606733851	1.04534515099721	0.00432696671184888	0.423818787963442	0.0818615468398243	0.090688795988855	3.08184457639661	2.34289371917322
2008224	2	5.46398038468744	0.273608301534772	0.0579883980005804	0.176242658692103	0.47146479955143	0.0972380197099597	2.97090639933929	1.01683758458097	2.46306049691227	4.93605235622242	0.369541098561504	0.737874367095352	0.409118214414087	0.00507231007647422	0.392695118362324	0.0802163340121867	0.08750152123132	2.91404788010601	1.85864471546645
2008224	3	6.12042367449954	0.228411736660341	0.0571199206542395	0.316858077184228	0.434463429416503	0.0967808211928963	3.16371271111166	1.05949337313092	3.02552410972056	5.26703815385615	0.653022095723255	0.623612159270492	0.332195809083471	0.0078764697800164	0.36367338441232	0.0800855996994448	0.0867476581124969	2.82317323884381	1.53765819287674
2008224	4	6.13894526837723	0.226945422339305	0.0558478747621522	0.303586665465204	0.407423593330211	0.0938381490199439	3.41940670908316	1.32698566413176	3.1744999063625	5.04901098286399	1.07116047234117	0.593268616098523	1.05994604808891	0.0278076445337801	0.342246695267902	0.0794108446031489	0.0915837443917269	3.33553172026415	1.69673037644867
2008224	5	6.3642118677285	0.400678343892871	0.0543384442910157	0.243855852468673	0.364195139089966	0.0798059916419396	3.78693568625225	1.8882182504063	3.68298012867873	6.00777264766504	0.699983688534457	0.582855437116248	1.07903568670775	0.154758488254719	0.340761565604601	0.0803589440405872	0.0802191098129051	3.5698693616656	1.26677011051423
2008224	6	5.55971450343465	0.550468001983685	0.0523742964168181	0.220129651475249	0.408888859988317	0.0659474537402389	4.09379297294615	2.2302045677956	3.77538444977493	6.3284874726092	1.24041459057393	0.529800135419299	1.98103606237775	0.313836227764368	0.332778427667129	0.0820516038212512	0.0452741753560854	3.99720650080188	0.911406470408121
2008224	7	4.40873894119248	0.880457159076484	0.0581291700645698	0.234531340902717	0.634998499584142	0.0600165979854866	4.46263253563512	2.36636379442955	3.88367052846079	5.84336943990065	1.5885345890322	0.498799848323036	3.04862750002362	0.434942020389894	0.29574311478746	0.0876713387265478	0.0683349468795321	4.34985989838087	1.10783367315235
2008224	8	4.63315997163504	1.35277762697806	0.0599120814212007	0.325969644536215	1.1054071024423	0.0659840753401636	4.53354424088992	2.26787527665097	4.00417599531655	4.45298059279584	1.52239852583009	0.49297165107447	2.57559290523151	0.426354355228147	0.286227280808436	0.0718643816357547	0.211014640208683	4.49847389031962	0.977750226172955
2008224	9	5.07358678785689	1.4942157847196	0.0597097094240563	0.378140275353973	1.48047413813111	0.108711571227601	3.82620431981256	2.3435495217698	4.0517280031726	4.23189036576313	1.40945273349017	0.483055029310867	1.34275724305704	0.346595248443751	0.264111769051976	0.0713845684794017	0.272121875987053	4.80303406926931	1.0524929692178
2008224	10	4.79058073166028	1.35155170736595	0.0643773467067916	0.395646045707009	1.51739947295103	0.123478551145664	2.89305664761779	3.23433678328553	4.05514872743608	4.1368845346831	1.31204521036763	0.374915055100325	1.85409646046268	0.278305811233899	0.238728924122453	0.0688966934237011	0.25786502479507	4.74152985875015	1.15239694589946
2008224	11	4.51044043442097	1.12215152622013	0.139061156027756	0.483076584791746	1.41488502844116	0.143520659900628	2.86838331787671	3.08641707531284	3.81584969664024	3.48322149869805	1.05158581848517	0.438923395678885	2.07128710551245	0.25782117688104	0.215837866780694	0.0573731303253779	0.251640333463955	4.33539671601506	1.06507518392532
2008224	12	3.75723146275779	0.824781011671117	0.143258749814385	0.750822081966092	1.23113694227145	0.135942971359518	2.65643750254772	2.71178271602274	2.99852414236978	2.91479298985988	1.00643200118937	0.516736947843051	1.75404567798037	0.350606123701156	0.195759225275382	0.0509000627445691	0.255035719686062	3.96239487076264	0.835127551793804
2008224	13	3.53824269912095	0.586198414040473	0.126149700300749	0.824522355923698	1.13120459656636	0.126816255631866	1.86763115101003	2.10541440828472	2.46366677039093	3.17780162949161	1.11749406234442	0.528355581503142	1.24063839651594	0.271601875090888	0.176246310988709	0.047574106539887	0.242286926039177	3.55537309918587	0.812280317358924
2008224	14	4.22028253906958	0.482869088733242	0.110878162364315	0.76291884523992	1.04386690684586	0.121397787242351	1.51543279175822	1.48390512937522	2.55608267958232	3.51222299064566	1.33739370667879	0.490553534149434	0.85050636180131	0.188457271385571	0.154996254735662	0.0457642727322296	0.318165712407252	2.94791204941743	1.00358343279571
2008224	15	4.09995671201947	0.397070662837391	0.105839616564319	0.671562086158628	0.915289238740048	0.123592299864191	1.51588184479998	1.03518523083144	2.59095338737362	3.84772827308695	1.56858046971714	0.391756264258697	0.571220289120093	0.13374423187837	0.142697064106254	0.0452892510174154	0.416980662831679	2.36219465798842	1.08488245770892
2008224	16	3.67821275419951	0.346860266362232	0.102252902909571	0.585130251222632	0.78505442312543	0.125793770490309	1.89669085422583	0.748828517052981	1.97778639675761	3.79882436805134	1.5453519312608	0.28222572128696	0.424230737906196	0.106032631764135	0.138852079016411	0.0450177026297073	0.46734325267478	1.84067119084079	1.01004806728418
2008224	17	3.43879597766251	0.325213788571866	0.0994159855969658	0.506458363980961	0.752446168019581	0.128104909331136	1.97734030455882	0.638025838105956	1.65935123472191	3.71344809049201	1.33364703454576	0.330989932347774	0.522744864708938	0.101842501010132	0.131944599492967	0.0445521891906283	0.450286379248624	1.8900984015867	0.972961813282132
2008224	18	3.28421573997428	0.297385946737434	0.0977282045465145	0.437312173761048	0.600237594663569	0.110649710289937	1.94385305588218	0.555266416451289	1.64992457132095	3.52744494705124	1.24541893561658	0.463841615816061	0.905502166438197	0.0772432357451081	0.124412002738654	0.0426761165699703	0.391004470470738	2.03717169274188	0.99154994624738
2008224	19	3.13498054207855	0.263089695921519	0.0936297442180682	0.316135371642087	0.467971203841019	0.0983645430637228	2.12762449231222	0.446332598304345	1.7771008768833	3.43588393564233	1.21595338836852	0.546525005006185	1.43116378418196	0.0635487752581454	0.120006585005556	0.0399315937422029	0.275065929316175	2.15297265544456	0.789595817933769
2008224	20	3.03502065269242	0.251926924639253	0.0879859292823159	0.269124802433673	0.379101070039237	0.0968791694721286	2.32535057228294	0.381097177662994	1.77745240652886	3.3867610912666	1.30066063635885	0.594038948625531	1.84585498070343	0.0515133198113621	0.117801988084487	0.0377910740185412	0.155468460148305	2.40595823680529	0.872889754152209
2008224	21	3.02593526835177	0.256844957808817	0.0830048539517662	0.26127459300037	0.344664844373681	0.0964828669149276	2.41951983805768	0.360298976153329	1.88276232562558	3.1978343935314	1.43343130768646	0.603134295318034	2.06339373063428	0.0421969715303505	0.116306198808229	0.0371869960993462	0.11374014173844	2.53402870333564	0.764792772308627
2008224	22	3.00703800330605	0.269325236092562	0.0781452124680534	0.256733335052981	0.317309537720521	0.100266249034425	2.31593077733098	0.352358871752702	2.16605855535071	2.96849474392677	1.63253311257261	0.625195446341259	2.03826336428503	0.0457698121136067	0.119783050208917	0.0380757832298957	0.0999156212157966	2.58857695695448	0.701934672112289
2008224	23	2.91865788784247	0.256510650854151	0.0764731535767616	0.260170848244799	0.300970224785189	0.105007203620531	2.17680005534828	0.349478855232579	2.23367602215972	2.70478057994708	1.63437706222743	0.686207297379677	1.83211872924006	0.0605731782773606	0.11662870364147	0.0385140667952294	0.0959404074941202	2.74428952327739	0.675633004301876
2008225	0	2.83784514003181	0.22623410630596	0.0690188024706925	0.267607234050687	0.301402370073726	0.101880556172742	2.02066726250654	0.366775168640136	2.12268758671811	2.29931606771766	1.35729103699887	0.691932446280088	1.73085511570561	0.0616443046675709	0.11341013119868	0.0387972848847927	0.101737375735945	2.67157142178257	0.660922716814747
2008225	1	2.68839131686948	0.183951091475895	0.0580630301337029	0.287547209061781	0.309210481438779	0.0815291832690831	1.67777410116611	0.397366685094113	1.89087761440801	1.97908285260079	1.40655484155579	0.728668717817924	1.78255422558911	0.0596234298114435	0.109250271701697	0.0395772442751514	0.102288257315181	2.5587067151657	0.669966742040895
2008225	2	2.39399460098928	0.140138242471455	0.0460921325521834	0.23453666834607	0.358612277945041	0.0595461107739158	1.34889962219129	0.411744399124381	1.60523240766767	1.76347012874199	1.26128378283886	0.805046203297119	1.23811654915946	0.0647417349221945	0.103341457791476	0.0443074727253027	0.102315006021605	2.42637801627947	0.548408284464065
2008225	3	1.41546027260603	0.111165146375131	0.0364563255704201	0.134122434920044	0.461055913968748	0.041783679216666	1.14282950913125	0.430749347615584	1.31472061807604	1.61804466021665	1.17299596383305	0.879895409558076	1.09986076792201	0.0745230793493266	0.0974171139724961	0.0622381512857991	0.10437193154033	2.28394421170485	0.32361294386923
2008225	4	0.731868276726991	0.0991142277978319	0.0320760841584594	0.0894006502593172	0.434850102481178	0.0417277536460938	1.07510724983121	0.44471132057862	1.05194906081662	1.53572613168614	1.07637976694207	0.912426330121119	1.29963451160683	0.0906711340288376	0.0913884422321824	0.0979969768220008	0.0981827920201837	2.06820269051958	0.27275412982399
2008225	5	0.625168123959055	0.0936579471438602	0.0313508123144154	0.0842117124124737	0.402126348481285	0.0563488123886696	1.01228963819972	0.456946211856514	0.664158312221137	1.56141986666091	1.08172114908852	0.790511767069348	1.42471880759918	0.131497813823658	0.0767733024358253	0.108784556251837	0.0972686406263588	1.73414506783713	0.152757528169486
2008225	6	0.588720520004023	0.0911895338601786	0.0318470771228807	0.0719954754706668	0.361298042724936	0.058433659177929	0.686338074417969	0.425236835603516	0.520685330662604	1.40136180367382	1.22001286915451	0.753675501241815	1.39803601420034	0.233998729504984	0.0604989268801845	0.09438258396194	0.0794024512358572	1.2443178817664	0.0444790637743127
2008225	7	0.583866391522697	0.0817290721680537	0.0800537563091871	0.0444044815201047	0.265713324708726	0.053413512912355	0.377508481836104	0.413590822055681	0.563532155322881	0.930489818285681	1.34910939925711	0.799375617374684	1.91382728637895	0.244508880637233	0.052185643127317	0.0707052151854006	0.0292180996202051	0.495239549591988	0.0212109557803815
2008225	8	0.712011311193408	0.0692103096345066	0.0786672769090065	0.039018069533233	0.161127818615853	0.0464306054032377	0.362011722841871	0.379556431632996	0.623970331742958	0.4455300674007	1.45998804960957	0.835103583600178	2.35687980394262	0.514564534430939	0.0617321644736933	0.0625074771896914	0.00731506194023841	0.410670290865318	0.0127853878401822
2008225	9	0.763915755383177	0.0606285189110285	0.0612773320049297	0.0512849424865935	0.115956506849201	0.038830175514042	0.372379688643312	0.28352682690676	0.856840077946033	0.278520704704881	1.46789635643247	0.809304972723945	1.73958137406699	0.597504536099712	0.0706603143155053	0.0605938972590423	0.00981630226478976	0.573268321081735	0.000680871558543902
2008225	10	0.603798402446044	0.0517150902560507	0.0809571137166526	0.0538239764998452	0.0906433122854363	0.0339283809586183	0.382409765773249	0.217449133916828	0.873579786451965	0.11988172827105	1.36468533139029	0.739985364831291	1.285568249501	0.6786861350508	0.0745381088412416	0.0566498972302211	0.0181298189818541	0.709111379079917	0.0654011061362532
2008225	11	0.550330005626362	0.0474103606695649	0.127164639291685	0.0473566829988216	0.0651257650777797	0.0372881678968878	0.341147280896529	0.213473662171213	0.699159718604137	0.0647927126668677	1.20526588310029	0.681986262469403	1.0471063225639	0.560569145032846	0.073792511239004	0.0482758269822089	0.044294975966079	0.788596084669485	0.979282957675823
2008225	12	0.474670989914045	0.0362313580013226	0.0728404756948669	0.0556982336973267	0.0601412966926107	0.0350430740490027	0.191926921169095	0.253568576257375	0.600285656282271	0.0206753445673854	0.996488661010867	0.645570206599547	1.1512790996973	0.529625484977819	0.0711170891977383	0.0424244219948319	0.0756762040267916	0.642345494697682	1.77001148426684
2008225	13	0.324190203780789	0.0382154646065944	0.0362845793976113	0.0475945205405325	0.0676382442708141	0.0594993348204587	0.0870028895007992	0.358238777209061	0.5697582236607	0.00309807076892311	0.807945236983996	0.619818027131542	0.776406596194674	0.449058271183904	0.0687615990186142	0.0437793748756826	0.0826741392103885	0.497965501709493	3.47157153372803
2008225	14	0.548410736934872	0.0193657844660023	0.00583641678734759	0.0326788270988192	0.0657691500382737	0.0898679322936108	0.112860152363922	0.216029305786411	0.673472170106634	0.04375058896088	0.66751475862985	0.609500182758336	0.24522511811719	0.425211324353909	0.0666320723983955	0.04344599174242	0.0926867372335993	0.461804715327318	3.9031321513793
2008225	15	0.605701638786346	0.00982979278792448	0.00294419878568926	0.0475195255445673	0.0584084885102195	0.0899979156304322	0.205621865644933	0.145563224625428	0.469419038803634	0.102121991060716	0.647515531271622	0.608984641116171	0.290397310459554	0.452027840536054	0.0641481628430637	0.0398280435367352	0.0986569508326707	0.43045441091607	4.2263595378881
2008225	16	1.88312362054293	0.0137751187034033	0.00782044815049784	0.0592533549328818	0.0529524984844722	0.080555542942766	0.215697663014635	0.264445925106598	0.517621239883922	0.0837820007128028	0.645167369419272	0.614260685487681	0.678953840186514	0.456653153112594	0.0608112497476155	0.0388459606341581	0.0966900203520872	0.144957961486923	2.41205206101232
2008225	17	7.02755630531198	0.136389776264394	0.0422108821359495	0.0443997776601016	0.0552939597851482	0.0720378655096045	0.0416026829830849	0.549213319765265	0.295870060826225	0.0170575080308152	0.617915489953725	0.592779520155295	0.889233253588924	0.420599426722049	0.0557894861975863	0.0407595666611069	0.093241500377749	0.128632675799427	1.3363792456114
2008225	18	11.2302812648993	0.493768171457346	0.11094042233653	0.0635389015609389	0.131981934665335	0.0678555128247387	0.00742307330175128	1.09808403553685	0.529593625700125	0.917197110538305	0.527652197870006	0.511272075984148	0.470381971100001	0.363266917741279	0.0511757089619953	0.0416065518851533	0.0891266892600163	0.214140836014805	1.09225013816308
2008225	19	11.7887165062611	0.512712779923209	0.344301353649919	0.0664090077640253	0.404714459849522	0.0514227679400515	2.00465896925389	1.06891474835922	0.874657177634003	6.60546459395936	0.446118281081025	0.44974914110862	0.218289381789299	0.366557413780905	0.0467877003478279	0.0425620190673629	0.087712036961512	0.201277570677692	0.954276451056334
2008225	20	11.3564978171533	0.325252544627167	0.47833624464715	0.0495906829449105	0.756303076646809	0.0164178422520402	5.95033137407429	1.89462323238036	1.92527692064986	8.0888214765826	0.429810630553842	0.371994683741655	0.239816273893739	0.332458895196835	0.0426509392158675	0.0434408489680881	0.0833250274521795	0.54590326991809	0.798080748383028
2008225	21	11.7381110466208	0.214383203024277	0.391593165049666	0.138073060942887	0.73120099883242	0.0158205861633957	6.67410784677452	2.10584538250101	3.99358556914297	9.68063439814208	0.406230273710509	0.307979251799343	0.447096652357023	0.264479790507036	0.0394726034559864	0.0429568705413502	0.0532626960222552	2.74601133085482	0.771351639602712
2008225	22	12.4292517996365	0.160898051173886	0.362047642547572	0.360480356556111	0.703975593136207	0.0628601710418782	6.8255949202006	2.03227608960324	6.2705076187062	9.3432275228134	0.407164385188403	0.267651175298457	0.547025736151604	0.190527089975965	0.0369808979467865	0.0420428197642672	0.0591534705627612	5.65380752655759	1.16387085420887
2008225	23	13.1160616044756	0.139433236584723	0.524905640333018	0.345742178686643	0.737053783957533	0.187481511572275	6.39645514384918	1.67064090496833	6.60466363663233	8.11629011121717	0.428491717592306	0.224305634502672	0.249590544680949	0.183314801552628	0.0335739812797492	0.0422835668098853	0.0816894018831948	6.88803386062941	1.49188078357315
2008226	0	14.054783855095	0.145651954517575	0.708260543739056	0.255720089401668	0.740530596734813	0.327439470638045	6.53586004826662	1.34647484544904	5.82239665957747	8.30900405514326	0.498065555551178	0.239168710390067	0.392025736348216	0.18303317982896	0.0309647707012551	0.0357186493583089	0.1113875700723	6.82711539912006	1.84318421784584
2008226	1	14.1735668945251	0.182261333093566	0.867461250477422	0.167133973283837	0.576861148291434	0.32726873966287	7.21873712431978	0.834121319932773	5.76892092060545	7.77829571532611	0.682190906038529	0.259246588635572	3.88217048908958	0.119570978745015	0.0288402734187399	0.0242225545204669	0.0372896116267372	6.16824126866026	2.00601624280765
2008226	2	13.9457346064374	0.286860599964345	0.877092757680416	0.139779435180342	0.211054859234018	0.309875689143407	7.95018499414586	0.757391582281634	5.74136273679238	7.20502627984265	1.04230514811092	0.243500236731014	7.81109630496213	0.0483372103001731	0.0269705422448945	0.014694218553626	0.0214654556327195	5.80832775261842	2.94141999662812
2008226	3	13.5022870770968	0.40758176326578	0.842713306799338	0.1438260255525	0.132673248560213	0.374976969527662	8.79528792641522	0.772006879287128	6.6498649420253	9.85787891448679	1.23462435792652	0.225056785705243	8.09850176542768	0.00694242197646976	0.0275578252768066	0.0043003246377257	0.0497682718862731	6.33995314310655	2.97103812632027
2008226	4	11.6475588281457	0.41864792205945	0.938872910831028	0.184819890505089	0.154962422984577	0.477920974404728	9.40396365696315	0.793962337765993	6.13310318091827	12.0238904501855	0.933350474710106	0.163579181422738	7.1361281973589	0.4077986557193	0.0296024205905516	0.00129915788240416	0.144047955289957	7.47153124202395	2.33566587277441
2008226	5	10.4662071349645	0.363480056365155	0.989324132447581	0.264608017457432	0.24134603545238	0.558390820322249	10.0548139650944	0.787597480850116	5.67771209122067	9.76874608274641	1.24556939328015	0.160178262685071	3.86427994948929	5.07735649733538	0.0278431049738123	0.00103677318188239	0.215354899510773	7.84599059163179	2.10509291771672
2008226	6	11.6672246343138	0.551645284638429	1.15108133415697	0.357724668908115	0.336606990716905	0.679730439537838	8.70343780154745	1.09620009171446	4.92927079642787	6.08810936816786	1.07387231055066	0.151303943177105	1.19529306484285	4.96202885357321	0.0257362190914209	0.00259799938771787	0.244792442343351	7.88032150420474	1.92819237955649
2008226	7	12.3926231915846	1.2169935747547	1.32307301827215	0.397511483562461	0.422530468089092	0.684496830700236	6.808403249675	1.35569158133839	4.08327735464626	6.73412113609637	0.986682835838308	0.189066846455758	0.392590658008808	4.39457062937109	0.022998387417822	0.0297965865507567	0.257602862574435	7.48441803027762	1.71229837426051
2008226	8	12.5177587283054	1.77952444835234	1.36154326881251	0.426514997814222	0.665749590067613	0.625885409428027	7.00742267663391	1.57500042195224	4.97387822537329	8.6795352461221	0.966080656944719	0.222515584461377	0.293779583314368	1.89105091991415	0.0233736945188061	0.11106515137884	0.298926427266837	7.49004868400725	1.54384463900098
2008226	9	13.2419959978321	1.58004129711753	1.3336399506216	0.427281072977814	0.764401474606477	0.537963858225772	7.80208303635371	1.95575823888167	4.62365987737346	10.6388290529314	0.98833783932845	0.226517342006459	0.616426589839687	1.16662689875212	0.0380443451716056	0.155695136994235	0.360722907064649	6.85601918537218	1.65800525089876
2008226	10	12.4879633431781	1.27424777494459	1.30144452982736	0.516213897633451	0.879264764246117	0.601072427734534	7.94149014453861	1.82034474374688	4.51008228470179	9.67648232739367	1.27056942048335	0.168619273028205	0.35721729323948	3.38594172873982	0.058511449218035	0.161159134925495	0.502919474104405	5.73156512435926	1.74233888424308
2008226	11	10.4630981380151	1.14885516798022	1.2101623312423	1.1398060391729	1.16084603159657	1.09184896927289	7.20307697733033	1.62661076501273	5.27873501174631	6.87126391295576	1.45515280528749	0.176948358375595	0.852532716727938	3.42621460096034	0.0991900234547346	0.216026934052198	0.625576804152082	5.89041610733006	1.59549087497848
2008226	12	9.47726854679578	1.17236853522886	1.21304241773439	1.59613800505513	1.33354988473759	1.35382103392017	5.91394179266196	1.52025195682016	5.29380229059979	5.31569796143913	1.61010842836693	0.302466259312013	1.64616496423768	1.13989083021259	0.133806554608824	0.346871183376801	0.553136954218506	6.82752875869751	2.01063819630873
2008226	13	8.26099034469592	1.2194183105412	1.34179195957656	1.54830737598582	1.24363946190604	1.45376759797262	5.84285887161664	1.48461941569373	5.07793424072606	4.83838822966265	1.68872091160125	0.278698372995516	2.10524247303672	0.443064092190098	0.111443481519497	0.419052090089276	0.459595940621931	6.57845006506796	6.29139630691145
2008226	14	7.78425402989632	1.13157578112259	1.45958758647372	1.25976689177916	1.11426814064203	1.29788666166284	5.59694727481929	1.37549523642704	4.69378339667553	5.66884162579106	1.72044684804137	0.195001330740807	2.47996393993711	0.160817853467147	0.0702806581694242	0.415357484701156	0.418098500326496	5.86180430677041	4.18149248526235
2008226	15	8.47176232069118	1.05344580247284	1.36562360228559	1.06261204416882	1.0681730266636	1.28611496991907	5.30146187705421	1.24894880659582	3.84645802521619	5.80571624023433	1.60706897903127	0.126364318093964	2.76161592369467	0.324994930105676	0.0416180201183908	0.358903765939426	0.40270622178679	5.76973939657269	2.57744073523309
2008226	16	6.940455369745	1.16136792600279	1.11907525569056	0.99881480767697	1.06722064059655	1.26010875666068	4.61326750904619	1.05212546539751	4.13643982435904	5.2055458968851	1.2700887977303	0.102274778734156	2.15947489302555	0.512907323172618	0.0367967208633658	0.328214979026418	0.400002216635522	5.72410152472839	6.42412251762385
2008226	17	7.46152652452636	1.07260329964566	0.850505849164612	0.997805553047134	1.07336956671915	1.0806451193778	4.54873651264371	0.888482475675007	4.4587805325786	6.38017091865842	1.29254503500799	0.113136350897744	3.98029382735648	0.77581325459589	0.0394247165044778	0.311102369733848	0.660442570428676	5.80184508636262	7.91858721108955
2008226	18	9.76169935314714	0.986803939756035	0.707455078410884	0.993102112278089	0.99455775298554	0.969283008347604	4.16495881622134	1.18113910499382	4.62741471333536	6.59190475745875	1.38127663667721	0.0384519098885779	5.66616885185167	1.17941805130595	0.068237128567261	0.297181003205122	1.19036916170999	5.33922634568771	7.26868698694379
2008226	19	9.26957872802543	1.14276291117546	0.413873388714465	0.853363738556986	0.953310214828298	0.937917156356274	3.76493631616272	2.59352385677576	5.03637277388908	4.78984860691458	1.24061802537564	0.00964817046316415	4.63742703034081	1.45636872275884	0.0969024167323755	0.295699697130683	1.28685391191498	5.17273848047442	7.48615072081419
2008226	20	6.50876097626242	1.36841585775639	0.395833726634317	0.798745850193233	1.43275542597089	0.798680709145851	3.62636163135504	2.86806551660582	3.90581036580314	4.14088810882402	0.846181928586176	0.073416572724611	3.90287603566485	1.55898137848311	0.103978595180662	0.29471769271247	1.1790206635595	5.25085349385816	7.23411444734164
2008226	21	9.24697418473025	1.33519302392582	0.421510956058017	0.88400354383707	1.91526885854466	0.588075454944597	3.65152651520339	3.68546571159823	4.56710345565483	3.80326679620456	0.675080816709784	0.312132658525049	2.60875707545607	1.49615016187136	0.103886696647839	0.294532206733806	0.810096761367152	4.07734562018517	7.27128044679037
2008226	22	13.8606550580978	1.29637203838794	0.446509595597905	0.954466795659382	1.87200804968081	0.520620230633797	3.48818323863115	6.75477491639969	5.9215408894309	3.09868254365803	1.14087198904939	0.527836857707859	1.76646954627917	1.59870992797705	0.0927048507633807	0.283857265014072	0.629046744923683	4.21045490595146	6.29610266394125
2008226	23	14.7817350776112	1.22672654329597	0.491608429908344	1.23988408029543	1.45664079089702	0.554365740490077	3.16300514169154	6.42671599539241	5.19445368671556	2.31197481132559	1.71624360331953	0.67076908573314	0.354615261392939	1.9443397366055	0.0743151215698082	0.261530393436952	0.556031784835901	4.54387250846847	4.42525587342832
2008227	0	12.379818317585	1.30221178503754	0.705098449406613	1.39232831159648	1.50775098218464	0.574997234120658	2.96690627340454	5.9812547794624	4.67636528802027	2.30293560619637	1.84617586972146	0.763808119974896	1.29373054826973	1.78229755235984	0.0704406325160092	0.261362050645774	0.569095969725043	4.46648754916888	5.12902051574473
2008227	1	9.88760998884369	1.45154714059301	0.76577826748025	1.25347969381621	1.90604796834083	0.711113820415162	3.43617568920833	4.56205281867302	5.79063454487141	2.51281137743657	1.62355501830615	0.838139830774102	0.715286686742572	1.43744766000014	0.0876714429274111	0.258823066180908	0.598569434490746	4.65681050173473	7.75029959417258
2008227	2	7.53968271817717	1.25811549853018	0.806689145459125	1.13041856226783	1.98602220735742	1.22550358154092	4.20862210163311	3.99910774980138	7.45722451835898	2.29066955021806	1.7358007677301	0.863496951606628	0.689986733484806	1.09474811229661	0.14819589815026	0.252703726022347	0.671275300875263	4.26474418576837	7.99229534936738
2008227	3	3.56066217263491	1.49154618262456	0.746660626100666	1.04719459864418	2.09016239137349	1.36602577630436	3.73809032925851	3.55884783671181	8.08852349039156	1.91637200373698	1.88588932642938	0.910015270925062	0.469261771131325	0.869006344174936	0.196360485058117	0.248430231207564	0.832013036562904	4.17515761510696	7.78454406376321
2008227	4	1.6387247012804	1.99973594825506	0.691183579986454	0.992362673454571	1.63596314085894	1.26728293990469	2.67648398811596	2.70228553188191	7.59085990989111	3.20050161638077	1.82860017959892	1.15287893288525	0.295260970521719	0.577908773525253	0.213607379440972	0.24551517313374	0.830119788470166	4.12842235678749	7.06284368497727
2008227	5	2.10702258003337	2.55730942413062	0.642872748490204	0.919353862803293	2.35935341071678	1.15489551722855	1.71953577924727	2.13217654433157	6.89722351556974	5.58409784805654	1.8832088349306	1.83133581190599	0.183021770916109	0.426620203953789	0.224100957375291	0.242321187920476	0.708309421114275	4.29075332272506	6.18804432586751
2008227	6	2.26887329027905	2.94345236886284	0.654772970542442	1.05683963939459	2.15335597425686	1.05866683609243	2.19611370453192	2.50655136214994	5.72347442370897	6.30365946967274	3.04748187882252	2.50495493792589	0.221167005395709	0.341655091333161	0.224491866036245	0.244863658003058	0.602128652014881	4.10072796674163	5.51842692350219
2008227	7	2.27691854524814	2.88154081573789	1.09122127675494	1.34515609360866	1.56927354600824	1.01541372144864	4.50354742693083	2.77189290316749	3.47052628766896	7.21410993762382	3.29661839541725	2.20294143437861	0.376829325151868	0.48534820615551	0.365777719009343	0.514120941916958	0.841230955826469	3.85802659492524	4.83137623527734
2008227	8	2.4950507670981	2.30315600309975	1.51079855584479	1.58458053189357	1.36639373739952	1.00265605461428	5.38623763414709	3.23712460247369	2.40445916124028	8.00636154593801	2.91628760815281	1.58557305182324	0.223005004432735	0.435257303289934	0.36809099346059	0.597100066659473	1.13140032525297	4.81171196506248	4.53153098984062
2008227	9	2.63594861035112	2.694047415667	1.19019965495349	1.86953426522366	1.37926718286893	0.984557690184455	6.11044147221628	2.75690508084691	4.46664129162172	8.24773482677849	2.69466251118845	1.32449297631071	0.166089684949856	0.432064364980098	0.366919855513457	0.670275980408653	1.55610375512839	5.32709929446239	4.08011757603934
2008227	10	2.63055742513552	3.07064097489793	1.02815769059378	2.36658557860547	1.36870753137054	0.953701966535151	6.53197330766326	2.59155604970771	6.28724312339143	8.10701813135056	2.99756429784913	1.23397018328175	0.232562468538506	0.289180732505982	0.368935673008429	0.718718108237244	2.03154307552714	5.29379062257315	3.73604510621556
2008227	11	2.483760853015	2.67766334202207	0.860674055649394	2.42457424795891	1.57535402281314	0.838064379830039	6.5191655573337	2.77836735226002	6.86569766282139	7.89713483562822	4.56395249037848	1.15577213175192	0.460644045987578	0.226149298861247	0.353721039413427	0.683080311078427	2.28470308061656	5.47624805500122	3.39894120136177
2008227	12	2.27785035597135	2.09295892442402	0.747461540164264	2.25524236359037	1.94587096175147	0.711816760717954	6.33575975581116	3.06334829018872	7.21135506888577	7.61730377443681	4.86873506147274	0.980702822591349	0.502390898595205	0.18398999057337	0.332419505890637	0.617223639202515	2.18185866054331	5.88648007938915	3.41624513345211
2008227	13	2.0532334290723	1.72296031913376	0.666357572634549	2.00307279315768	2.20692698399677	0.599793658271843	6.24466159982376	3.3685709042371	7.26140416938429	7.24402695792942	4.30865510253653	0.836755738012205	0.569942717916428	0.150338858738265	0.316458845177807	0.563543502065599	2.06948895298581	6.74935469967694	3.28431389042491
2008227	14	1.89968164553435	1.87641229637592	0.617122896084645	1.71437535816927	2.28888159303072	0.520707472466255	5.67739960513674	3.74449052551899	6.97156021389866	6.26203090976924	4.08928976255546	0.752289894146909	0.707114578532658	0.117105578620565	0.30397596818556	0.522453065582011	2.09370462706653	7.26800343543747	2.76244976319735
2008227	15	1.64334076886232	1.74405422527897	0.581471640567583	1.38787701173845	2.37924715717083	0.46898757780753	4.94646565771849	4.17732923049858	6.37595655565839	6.1125438701078	3.78610171245706	0.704175973595036	0.737689562866677	0.106726566848234	0.291148075932849	0.501985845967192	2.23165651287844	7.29772387975699	1.46913938579258
2008227	16	1.32086791738662	1.3961590224078	0.54645299359289	1.13699567359952	2.44300422016586	0.433814938807363	4.36172129326245	4.60311344362552	5.8194507909257	6.18749234945804	2.96918672880027	0.851690906744697	0.732350098106209	0.130214886438815	0.281462884374614	0.49120100556882	2.22259011052058	6.98124192572165	0.974823641550753
2008227	17	1.12189765647407	1.04919477812453	0.525522482201885	1.08314320998041	2.33536327404259	0.423349370534847	4.34143627941508	4.78195198427511	5.33445507226243	5.94432406741463	2.68272319655728	1.18014739371929	0.78886590518549	0.107236273719915	0.279553423082321	0.491709486198675	1.99921347282574	6.42821784404953	0.848885883311115
2008227	18	1.20548513793139	0.753186612732666	0.365090488347844	1.01154103951425	2.06192411227865	0.436278740797782	4.21760324753027	4.82066416269341	4.83095376932816	5.72990213352222	2.54123270573244	1.38700132392398	0.753865474991493	0.0970633437171517	0.258590101273256	0.416220320122429	1.76271326275331	6.04455052960747	0.831421476822066
2008227	19	1.25258043097714	0.558638644059096	0.337327030037026	0.916801439847407	1.71172357551529	0.450829425048439	3.80756687057808	4.62719407914012	4.39503777619355	5.17969573692852	2.02938816322691	1.35403471333327	0.631988771027303	0.0706804052843316	0.241885135193161	0.394387642991176	1.60193334946629	5.86805108673536	0.650901178623193
2008227	20	1.34242003311136	0.360889279087073	0.342246573688627	0.7736450847211	1.26607953521871	0.438310877099536	3.190519688778	4.30897121983228	4.04220680780017	4.43425471805061	1.9667950736641	1.36960274433406	0.554962312516807	0.050868471081357	0.230294910029289	0.389624779046265	1.46221481171087	6.01153183834397	0.448110613881628
2008227	21	1.38764667082243	0.315715056084574	0.362115015803841	0.535255764740752	1.02149768854399	0.408909008314377	2.76298364422543	3.95716520420571	4.11594344137628	4.11998152949075	1.61964374180105	1.62496212027109	0.516708840702379	0.0496503068648253	0.223327467793623	0.384380517611708	1.3149669371771	5.97697241661983	0.394715776949445
2008227	22	1.41917277491467	0.298256219520211	0.383856082821598	0.412012325293371	0.89904964336561	0.400837704526459	2.38988866826986	3.63344496037422	4.78651923602564	3.95079627543115	1.21265754054476	1.88729710146079	0.478830483102732	0.107691510444208	0.216187530532785	0.378364555908042	1.15778566471637	5.87389635539284	0.335935413811589
2008227	23	1.22688418523497	0.285403029581847	0.400957103455083	0.369503302963778	0.802197850028714	0.398702170271347	2.04031400926903	3.32056975357466	4.81977454050818	4.1020889412199	0.993106439812399	1.91442711307593	0.489256984934274	0.0663791698669116	0.242799911914479	0.383708497733454	1.0405625949124	5.77939743340373	0.282361322956864
2008228	0	1.08945571569643	0.280361958577851	0.416656881394553	0.343181747183371	0.900977092459897	0.387667343216766	1.93899443556632	3.01099197416696	4.5822745013382	4.15245184074153	0.972739550899994	1.79938841147736	0.619493063253562	0.0168580183193501	0.265019922634769	0.39052761157334	0.953994611474008	5.49842485671221	0.250555213771057
2008228	1	1.07793966547348	0.274642440943409	0.425670807976227	0.336693608207701	0.875136378916648	0.376864198510695	2.01441954161695	2.69860894256946	4.3348122677294	3.99718475179413	1.21762895183612	1.7472540958164	0.81641507350493	0.0154001258059343	0.285305364900489	0.380530308975043	0.945072004921953	5.16874513621798	0.230560182159642
2008228	2	1.13162647316338	0.265357577356494	0.42604035064825	0.34237915039435	0.791272544961107	0.36717746209018	2.11723004713556	2.37348416596321	4.14734297068456	3.6856951395522	1.5873784538154	2.13393603669496	0.761975413038837	0.0137201431190331	0.310307518099131	0.342774425472213	0.950355436156326	4.91073491234417	0.21763085213622
2008228	3	1.07268967558911	0.257434119439073	0.420650224636139	0.350523640229305	0.771513899567324	0.354030368052842	2.09597718959078	2.05758474013443	3.917023196093	3.38412438865225	1.82717602844012	2.51256440156643	0.710069806974021	0.0142422557297531	0.302909113382021	0.326867377317143	0.906284115143135	4.64303071143275	0.211794330033771
2008228	4	0.794045610580107	0.250744686797495	0.417534003861208	0.356255271923981	0.774752042033046	0.342896584604858	2.09283241541361	1.71659294152053	4.13115993810299	3.2225897374169	1.9114502678343	2.62169835260423	0.614307996362178	0.0128758452187982	0.313984404825056	0.333836105588607	0.766011813785524	4.29843137696989	0.215523996667603
2008228	5	0.552769126838917	0.243066565298229	0.464871046062937	0.357055950512601	0.838602544093062	0.377384816821132	2.15474132770233	1.48642030602249	4.29253263982909	3.05984412870285	1.97669983289569	2.15569648299042	0.480140725362379	0.0172785841223365	0.307881977939465	0.343076867604929	0.648012360686307	3.82864839900778	0.226711615502909
2008228	6	0.4751804899553	0.24215012476207	0.585030738056389	0.362488902248859	0.953083389504333	0.43932694158214	2.15534868594348	1.26214144695362	4.19774669338206	2.8895710570198	2.0191733601867	1.79021579215105	0.367397891983165	0.0352023801719845	0.292917584102923	0.349164519033657	0.605115898689797	3.33895944089057	0.235307645436257
2008228	7	0.460365477410545	0.258165370116511	0.500778041248868	0.361622471954463	1.04942973661814	0.420535465205499	2.78214281106803	1.23634392032336	3.63488994915604	2.86715501501656	2.05239994517952	1.79000624119553	0.333377129938421	0.0784049556287291	0.285607715314659	0.357200419396068	0.627026759579905	2.87203593828	0.564781485198651
2008228	8	0.479522090766721	0.360027395241599	0.346452922630247	0.505374489202789	1.10567946729281	0.492435610899667	3.05794578968766	1.21352169795661	3.21866277274788	2.67644129813484	1.9397605119655	2.03646390541568	0.310637983623811	0.132442096759747	0.281026888401874	0.358165319588095	0.643431607435194	2.57760061003419	0.931310851211791
2008228	9	0.550111177867168	0.447813295604609	0.274330756160801	0.618051324504134	1.1217443909164	0.564360737506948	2.22297841127333	1.11519998749837	2.9461749030577	2.31634339504262	1.80695654566494	2.17492750919895	0.322304397460941	0.148065923669034	0.253082380897595	0.34850074996815	0.676062386689848	2.39764580606222	0.989452384392799
2008228	10	0.635953597198483	0.57005404911981	0.259344641984457	0.693533324253612	1.10372439423835	0.568183254765811	1.69321675306914	1.035970441117	2.76573528309602	2.06700486805921	1.84286729831804	2.24557585612349	0.281287215843904	0.139563692322863	0.211193566204717	0.320589086751684	0.696351311986285	2.22947098241874	0.742239874334927
2008228	11	0.726018497725246	0.60507295822028	0.286138379153769	0.656154056897488	1.08430713150128	0.541091276322009	1.32087713007861	0.948874214728218	2.6681401959434	1.89984347414012	1.89487125797388	2.38944879215001	0.222866629212551	0.129910827008244	0.163023183961125	0.312339670124051	0.694462686316758	2.0892362992142	0.590277209641139
2008228	12	0.974680028952265	0.580846457880061	0.305571107699289	0.591108325783877	1.08957496645507	0.487746877989532	1.13054127560335	0.866952237938954	2.59284788214507	1.81895211399039	1.99169825665635	2.48355537096521	0.171575035513408	0.121655552865338	0.117702849855525	0.322392433191533	0.682852726022218	1.99787715913607	0.45517752937612
2008228	13	1.57867775778038	0.545397287174842	0.269613906840308	0.53796377198299	1.07632337683743	0.423963844393106	0.965143105739229	0.812206136689958	2.46952630704553	1.78824144982973	1.99746545211419	2.4595194028799	0.148013911148531	0.115487767732207	0.0661445727996973	0.296659646078416	0.657341566659564	2.00675189709331	0.367810612700486
2008228	14	2.28155634462963	0.50434126671501	0.237734988059011	0.49650780219307	1.05430245047155	0.307590061091347	0.861522169100066	0.799725082789408	2.34716030567862	1.83344559981558	1.84125128629352	2.27328284417953	0.142039830071841	0.109276913441446	0.044575924152878	0.258898902753928	0.630626117926687	2.02924918572913	0.307587029351537
2008228	15	2.86159583076501	0.472228350864674	0.212926495691447	0.460904503722114	1.01302506206857	0.159823840586066	0.796893338021629	0.819805648298077	2.24974362105579	1.95858270290277	1.51979002577462	2.15046397493403	0.179358815710187	0.104409307085606	0.0427861081775802	0.207265641466121	0.609078929083816	1.96984608635093	0.277867509090608
2008228	16	3.16067410836033	0.436984185573303	0.193488930761575	0.43575129809277	0.964492036793684	0.0538601465983585	0.744993586346748	0.840629979011105	2.14723265182791	2.12778569291689	1.40589571847235	1.93374273287838	0.220741455417583	0.102635103566445	0.042020605437006	0.170880215778252	0.606254013013681	1.85120289231781	0.263869469625906
2008228	17	3.21882732828688	0.409874634723846	0.182247448705746	0.414105030708071	0.923765416252026	0.0532813224884516	0.727551184350843	0.800631019645905	2.05687543270699	2.22755923584329	1.34324122177417	1.71297024245619	0.231582237086904	0.10141579351349	0.0395079572588653	0.158924435953553	0.622553233609935	1.78740759124199	0.261857477264069
2008228	18	3.16819169719079	0.371410159265694	0.171460946237487	0.378790124428304	0.865619246670537	0.056573506364481	0.725180791149835	0.710452103399975	1.92997137095644	2.10224477716928	1.32885133917976	1.5119103581776	0.212758126785379	0.100191661921559	0.0333404018679994	0.165451137721502	0.63206084751529	1.75937393243987	0.256195409404828
2008228	19	3.09762128893813	0.232579834228539	0.157652721661848	0.340833345749236	0.818004025597229	0.069583457134177	0.812673908347269	0.613603068579447	1.72428598517261	1.93436172555933	1.41867377849192	1.32684144813719	0.1693639296511	0.0988788344176374	0.023962005678937	0.13372750184726	0.677429085109415	1.72483996481034	0.178366876242106
2008228	20	3.03444803888561	0.220604799174576	0.150159439975176	0.3263258494125	0.816968699013948	0.100991352262233	1.04194959224055	0.605011613300875	1.49748426210655	1.76031119830535	1.40818983418897	1.28673568851247	0.127895093138789	0.0978143735389494	0.0177648357601894	0.0799945524130751	0.713050445520739	1.71315591179364	0.182486007288759
2008228	21	2.92574859279902	0.213383009278406	0.140536176782195	0.319155118377754	0.845138224764155	0.130344889325335	1.16069272072427	0.686017349060233	1.31290015580963	1.59909089622881	1.37081925290974	1.12885426082101	0.116028060220605	0.0969904549100485	0.0153757651748017	0.0595376664961728	0.656004249915198	1.66151646496455	0.189183117056677
2008228	22	2.77960518157619	0.214223228083298	0.127617019755509	0.319392359567021	0.892317386913834	0.153827297253113	1.15133351711264	0.679092721347664	1.21640340850196	1.44458328280572	1.30436653832554	1.07742699650224	0.102996655946756	0.0964546800946131	0.0141065224386075	0.0515355136183063	0.569792069719372	1.62152375528865	0.199680437508997
2008228	23	2.71892753667996	0.199542017817008	0.125121416499284	0.330411404515595	0.933218258588216	0.153896503554385	1.10110744979463	0.692995421342502	1.16117013614417	1.32034816841034	1.18611465320568	1.02543748839746	0.0912440531274853	0.0961099304087709	0.0137935994651	0.0396566942685147	0.527876444026561	1.61238479637592	0.206485471850511
2008229	0	2.6671850984849	0.184766844764493	0.136200668696495	0.331080210785483	0.939173292414208	0.152502090407574	1.02407189512307	0.735468413253824	1.12210780573424	1.18168461426867	1.23809771586782	0.956272855391526	0.085500681045983	0.0952308982714893	0.0143420146270133	0.0254648099512442	0.22429647473216	1.6326419262446	0.205903367340762
2008229	1	2.50486402463538	0.175564099114819	0.14967263444285	0.319185092018064	0.89223655389107	0.158689094278374	0.981494312215265	0.788399248405969	1.09527007949811	1.08165159985401	1.21996300815956	1.06549369325371	0.0877664603796168	0.0917170368734793	0.0152335480224644	0.0159550974520743	0.114060299715368	1.66373400722368	0.200165180066147
2008229	2	2.28867490688303	0.170578237615074	0.151030319042522	0.310206045045069	0.828161307422346	0.168507036928282	0.915959432487321	0.829253939545825	1.08472640376873	1.02406162905417	1.21181695521328	1.04644457724839	0.0903244129795311	0.0832004488349846	0.0161148190265738	0.0132431877988115	0.10238870161259	1.6967764473911	0.192805994952755
2008229	3	2.08120597825659	0.168401617309502	0.145164250309949	0.305655381769576	0.810726980060914	0.181148303230143	0.83086108311187	0.838672913174672	1.07871531318755	0.979735523986284	1.18032201699702	0.958106462884901	0.0927272800891095	0.0675087310058014	0.0177590799266965	0.0129012354315538	0.189027462121819	1.74314146732326	0.184826516301965
2008229	4	1.95727290922506	0.16918302475427	0.137894334294811	0.306283795050155	0.82910038325081	0.189746197100322	0.78125777121552	0.812724154609341	1.0835390703706	0.948761212385347	1.08720803387854	0.731798090063012	0.0943854813782265	0.0535613542696882	0.0223492358893704	0.0192579839878986	0.187530443925709	1.80104352305987	0.177134906549624
2008229	5	1.80103179439264	0.174819927922783	0.130289003553398	0.351896580133606	0.850254359635611	0.190647129306102	0.758479048807421	0.769097431679634	1.12246945204009	0.925916872486809	0.967732772268673	0.49119739306855	0.0973967263974282	0.0482002883875078	0.0310893073155685	0.0412547791547844	0.3434996210445	1.84561750354665	0.169950471810261
2008229	6	1.7723292523576	0.245293869063611	0.120427915234009	0.530301960338262	0.856193020806079	0.27721056445234	0.740895485536256	0.719512697005377	1.18793222611742	0.897858493100683	0.871703664948979	0.258866150908358	0.101772378140096	0.0462552924095707	0.0433397492957264	0.0594497518250124	0.906908568835633	1.87620359318101	0.162282215929205
2008229	7	1.82922942673916	0.318694543021278	0.155722043986886	0.739038825294567	0.807397842829011	0.327177427408326	1.4323033418952	0.686903388494517	1.26177583221398	1.29157979358062	0.930086244092807	0.211004823529216	0.116665768779879	0.0429755772037825	0.0574391945860748	0.0608652443903079	1.28253350474646	1.88267580704817	0.237955209625527
2008229	8	2.00321107663347	0.379165384424583	0.199905611139844	0.696702783535031	0.707127389145664	0.439459759495323	1.22809398589964	0.661753527518532	1.33390965329979	1.66208337054325	0.907000486172431	0.218084904487512	0.115025128005212	0.0344754180009828	0.0735193645581679	0.0572095397683172	1.37073339623827	1.87762821445058	0.233934919293708
2008229	9	2.1371980466983	0.357935467101718	0.202847720169587	0.707983834781846	0.622438546816652	0.458281208249134	0.881824959168378	0.635990092497786	1.37143159751824	1.79458723532237	0.917795462338044	0.212505827263852	0.111255268384444	0.0233274630997552	0.0739355406700954	0.0497952994275194	1.4465657484269	1.8724271928579	0.291755207594495
2008229	10	2.11327274985426	0.349896622825253	0.199176354515167	0.703221432334127	0.575269992566237	0.475969511823994	0.859233896486228	0.635187875433021	1.3619470870176	1.79286784226129	0.927619693551763	0.198494493361186	0.104758542711431	0.0171864035424531	0.0617188129715928	0.0358936127843117	1.5050191104502	1.87352858757895	0.40549463027492
2008229	11	2.06248310299252	0.361275186686152	0.17209986553588	0.670270348851475	0.56177045901037	0.472685381517694	0.758197151678948	0.634328417412331	1.35841756218334	1.58744721855148	0.916142705384034	0.1775027776766	0.0914066649557111	0.0136084662530682	0.0456420307164284	0.0318307371027674	1.52564770585015	1.88937260708969	0.410161462357565
2008229	12	2.04765681810084	0.361386032288631	0.145747667084692	0.608210636928234	0.597621290267131	0.450018170562567	0.662050845649446	0.644673554928644	1.35899985075002	1.37470315881106	0.890146844884661	0.146640420849547	0.0842186084599248	0.0109815150777696	0.0295819153020464	0.0305162928370522	1.52362707794357	1.90926438473071	0.365420931934635
2008229	13	2.05655411967805	0.341217814474249	0.127843169152647	0.535259601923721	0.582617016634554	0.427166387409011	0.576451212134764	0.688896057329189	1.31817989025103	1.10652699641916	0.815473087025758	0.119695746645137	0.0751091582251356	0.00979275874668065	0.0229942075927339	0.0237092232066576	1.56782651294672	1.94935227286873	0.328893031761739
2008229	14	2.02481033273617	0.310378691961445	0.1162329703299	0.486878253628149	0.55765724587566	0.397982993048885	0.52601480446135	0.73647304580598	1.27663128003143	0.889909760651966	0.735512796931549	0.0866169376757052	0.078717761476719	0.0140602449007359	0.0358176917075419	0.0219202965689235	1.6786837365433	1.9755058854135	0.297610365189
2008229	15	1.9899348259296	0.283567110041455	0.106628983767629	0.471846633732771	0.492778027652093	0.367428060317748	0.491281586535904	0.776913826974663	1.23823646890374	0.712418629606136	0.692685464981142	0.0700585820281323	0.103604364409643	0.0131457476611325	0.0348388385768126	0.0175646145185088	1.82988734854791	1.85835878790608	0.259230967682214
2008229	16	1.9498375777311	0.291475205274567	0.100778252608267	0.484788690667136	0.384220114387205	0.3275289471735	0.474412994472964	0.774546321354555	1.2368506364499	0.583744487637726	0.663944989217389	0.0742718869969791	0.195790702579217	0.0253253655013018	0.029698211331931	0.0116417061299192	2.07215492970264	1.54600666641379	0.216858264083961
2008229	17	1.89634898049686	0.291753833260036	0.0994892632783292	0.505055051765326	0.317735294835688	0.291157916953396	0.469036184992394	0.699413699738467	1.18716450822669	0.482245803760278	0.611044622088519	0.0759646239058352	0.290643382181716	0.0546361858258345	0.0262399131787266	0.00651203897422524	2.17460840455786	1.08461987361344	0.18189638682919
2008229	18	1.82860928335079	0.32265854834334	0.104612999002305	0.481889956997791	0.30372013294347	0.272714163269421	0.570791416696335	0.58474636343542	0.948901217873066	0.397994341237181	0.523278049140216	0.0784996934543016	0.40194620548565	0.125583480403309	0.0250542389385669	0.0089491233246906	2.12875757552114	0.687565468493914	0.142829852764673
2008229	19	1.67336867935601	0.309251863476445	0.103472296326549	0.472329142757664	0.302723149969382	0.274054692549972	0.665353753167598	0.515134134507782	0.713193764816645	0.367233655713797	0.407494660951939	0.0898208947740243	0.494059617847624	0.0892041698910095	0.0215717239964813	0.00538736370653281	2.06563219169827	0.492266422692903	0.126546425209373
[truncated: 340 more rows]
