# Supplementary material for: A comparison of sea salt emission parameterizations in northwestern Europe using a chemistry transport model setup
Source: Copernicus journal article supplement (doi:10.5194/acp-16-9905-2016), 2016-08-08
Supplement: Supplementary file 2 [file acp-16-9905-2016-supplement.zip › conc/conc.timeseries.values.sum2008.zero.Na.DE0001R.csv]

doy	hour	pm2.5	pm10
2008183	0	1.07327061282581e-16	1.56123229849209e-16
2008183	1	1.05040399669986e-16	1.50748898854945e-16
2008183	2	1.03190735059634e-16	1.46637566312133e-16
2008183	3	1.01872987595973e-16	1.43586345006782e-16
2008183	4	1.00849680846432e-16	1.41269209478602e-16
2008183	5	1.0006454716973e-16	1.39254179470743e-16
2008183	6	9.87597779772899e-17	1.37564043982001e-16
2008183	7	9.7152525174114e-17	1.36225033302747e-16
2008183	8	9.59130725454129e-17	1.34644521431504e-16
2008183	9	9.49236227725969e-17	1.33099323886099e-16
2008183	10	9.45102675022743e-17	1.3187630190534e-16
2008183	11	9.47655495508634e-17	1.31466512349447e-16
2008183	12	9.47489841909151e-17	1.3137667721083e-16
2008183	13	9.39241081017439e-17	1.30129591241547e-16
2008183	14	9.12236893256507e-17	1.26136805477069e-16
2008183	15	8.76273511298085e-17	1.19701901829345e-16
2008183	16	8.79466679986906e-17	1.19488737580114e-16
2008183	17	8.72316580257627e-17	1.19965810652111e-16
2008183	18	8.17105350547837e-17	1.15888298311016e-16
2008183	19	7.37487469958312e-17	1.08132633613819e-16
2008183	20	7.05566383923114e-17	9.99901695428775e-17
2008183	21	7.14830745093134e-17	9.49626706085048e-17
2008183	22	7.3208167829892e-17	9.62035500932683e-17
2008183	23	7.50580450929049e-17	9.86146724822305e-17
2008184	0	7.50383643177767e-17	9.83960409205295e-17
2008184	1	7.25125085064172e-17	9.40244030379124e-17
2008184	2	6.81690446326061e-17	8.69849047217936e-17
2008184	3	6.33825416896379e-17	8.09904803613881e-17
2008184	4	5.98592606902364e-17	7.62848837450135e-17
2008184	5	5.83102740819748e-17	7.34708881727654e-17
2008184	6	5.84133734810882e-17	7.28028550082891e-17
2008184	7	5.99068682878453e-17	7.2979246890714e-17
2008184	8	6.15969888948232e-17	7.29719071072696e-17
2008184	9	6.21293685737003e-17	7.34259980029384e-17
2008184	10	6.25833065450281e-17	7.43180369574337e-17
2008184	11	6.25223986957779e-17	7.41493139469035e-17
2008184	12	6.09526852443876e-17	7.16718768338091e-17
2008184	13	5.86131934329733e-17	6.82558958695759e-17
2008184	14	5.61317416400998e-17	6.46762804936042e-17
2008184	15	5.39156987587537e-17	6.14317066192563e-17
2008184	16	5.23661064255298e-17	5.86960780107289e-17
2008184	17	5.07763109385448e-17	5.65398327933946e-17
2008184	18	4.91726827768056e-17	5.48669893522204e-17
2008184	19	4.82719371735535e-17	5.38514026119295e-17
2008184	20	4.75852140488472e-17	5.30010961296749e-17
2008184	21	4.66482708610857e-17	5.16092718744971e-17
2008184	22	4.52700159794039e-17	4.98085335453561e-17
2008184	23	4.3822524137344e-17	4.80418961025909e-17
2008185	0	4.27947010191801e-17	4.68904573851938e-17
2008185	1	4.2567397665022e-17	4.65523602803963e-17
2008185	2	4.27768131311349e-17	4.67231404233065e-17
2008185	3	4.32131127627432e-17	4.71563720551689e-17
2008185	4	4.37624068315638e-17	4.77131652123798e-17
2008185	5	4.39299752476272e-17	4.82592428292332e-17
2008185	6	4.46037831228958e-17	4.9092855244779e-17
2008185	7	4.56237888544174e-17	4.97073743457637e-17
2008185	8	4.67450356402045e-17	5.0515338890185e-17
2008185	9	4.83162655089985e-17	5.24746033782185e-17
2008185	10	4.94538873174316e-17	5.42135004315249e-17
2008185	11	5.05810746123025e-17	5.53278089547449e-17
2008185	12	5.10336075501842e-17	5.53911256383749e-17
2008185	13	5.23773543483461e-17	5.64057825376141e-17
2008185	14	5.58543285815529e-17	6.07270164137629e-17
2008185	15	6.34091332746971e-17	7.20704575870388e-17
2008185	16	7.34523800733492e-17	8.82084114771389e-17
2008185	17	7.91388423168125e-17	9.73578217384889e-17
2008185	18	8.07198987838403e-17	9.95800758931656e-17
2008185	19	7.95050098023504e-17	9.83092467504704e-17
2008185	20	7.42041256580871e-17	9.01461317079316e-17
2008185	21	7.12538483616563e-17	8.47880264790412e-17
2008185	22	7.19092597281666e-17	8.50938729865448e-17
2008185	23	1.15085030322961e-16	1.62667357135282e-16
2008186	0	1.15992946106529e-16	1.63745321457908e-16
2008186	1	9.97678000170081e-17	1.29667685252619e-16
2008186	2	9.0812345451332e-17	1.0993182716132e-16
2008186	3	8.62680493968262e-17	1.00498292213543e-16
2008186	4	8.4208986097729e-17	9.7526079511363e-17
2008186	5	8.40952830458492e-17	9.77316093342248e-17
2008186	6	8.48763750612308e-17	9.85392206417742e-17
2008186	7	8.49859126324617e-17	9.8745370614657e-17
2008186	8	8.45590884223165e-17	9.82578967831833e-17
2008186	9	8.3791498367988e-17	9.77899253799503e-17
2008186	10	8.41478842945304e-17	9.96945341086544e-17
2008186	11	8.84118070155991e-17	1.08771087814295e-16
2008186	12	8.85755363471494e-17	1.10234341064778e-16
2008186	13	9.01329578786345e-17	1.13054879597583e-16
2008186	14	9.1975513092018e-17	1.15427386501808e-16
2008186	15	9.33295946069002e-17	1.16269460884733e-16
2008186	16	9.41262015266969e-17	1.15585997201637e-16
2008186	17	9.48748121316988e-17	1.13969389323542e-16
2008186	18	9.60537947840406e-17	1.1327173027059e-16
2008186	19	9.80377855280433e-17	1.15056197045785e-16
2008186	20	1.01136942494443e-16	1.20706838374805e-16
2008186	21	1.0747647299609e-16	1.35296056889021e-16
2008186	22	1.20374638915223e-16	1.69757583714573e-16
2008186	23	1.20234678334515e-16	1.70012579096836e-16
2008187	0	1.20706604021171e-16	1.71561084052899e-16
2008187	1	1.21702706964926e-16	1.73926606944567e-16
2008187	2	1.23529212479088e-16	1.77990364155952e-16
2008187	3	1.16762720175413e-16	1.6289853978815e-16
2008187	4	1.11567655572296e-16	1.52196138565416e-16
2008187	5	1.08316645468448e-16	1.46784901267318e-16
2008187	6	1.24786269866325e-16	1.80205358614641e-16
2008187	7	1.14811962532359e-16	1.59736874249586e-16
2008187	8	1.0835117955476e-16	1.477886060273e-16
2008187	9	1.03729315627594e-16	1.41989441557915e-16
2008187	10	1.00759700618097e-16	1.39282258924565e-16
2008187	11	1.00271810827087e-16	1.39295954096083e-16
2008187	12	1.06555410113574e-16	1.48839527076657e-16
2008187	13	1.08140337979509e-16	1.5090322621913e-16
2008187	14	1.06628681017621e-16	1.48659039379804e-16
2008187	15	1.05825737349961e-16	1.47094770433213e-16
2008187	16	1.0311284514821e-16	1.42165049277737e-16
2008187	17	1.01034837514724e-16	1.38100451072664e-16
2008187	18	1.00892665052871e-16	1.37650104412941e-16
2008187	19	9.99458644638013e-17	1.3504573978483e-16
2008187	20	9.88220078269197e-17	1.31919193932396e-16
2008187	21	9.6428752038262e-17	1.27713647443364e-16
2008187	22	9.26480742019993e-17	1.2232689694643e-16
2008187	23	8.83894727814631e-17	1.16966707742549e-16
2008188	0	8.52813195589203e-17	1.13294128505933e-16
2008188	1	8.5440139519523e-17	1.14660854660745e-16
2008188	2	8.77488960524776e-17	1.20062805734918e-16
2008188	3	8.51098295403063e-17	1.19897129040406e-16
2008188	4	8.54115620342605e-17	1.36501205065402e-16
2008188	5	9.90436175287457e-17	1.75488177030903e-16
2008188	6	8.9027405794604e-17	1.60468019921047e-16
2008188	7	1.00859483180158e-16	1.68618272256426e-16
2008188	8	1.17204380374418e-16	1.74940558530237e-16
2008188	9	1.19849714167e-16	1.73236802514043e-16
2008188	10	1.20556761532797e-16	1.72268213177813e-16
2008188	11	1.21832922126893e-16	1.72552682131701e-16
2008188	12	1.23335331382828e-16	1.74252431512496e-16
2008188	13	1.24510271959685e-16	1.76242863588215e-16
2008188	14	1.23681611001385e-16	1.76660928525879e-16
2008188	15	1.20531047141108e-16	1.74267887464687e-16
2008188	16	1.17588230974201e-16	1.73360681767579e-16
2008188	17	1.19977997454253e-16	1.78940583598371e-16
2008188	18	1.17855485257706e-16	1.7664731887396e-16
2008188	19	1.14255221077138e-16	1.72339207885934e-16
2008188	20	1.12979854387198e-16	1.71399006220764e-16
2008188	21	1.10153687798227e-16	1.64167773382943e-16
2008188	22	1.14547111960207e-16	1.66353610194222e-16
2008188	23	1.17255823003436e-16	1.69899414409461e-16
2008189	0	1.17073482919123e-16	1.70464182151704e-16
2008189	1	1.14693635159497e-16	1.70192491043588e-16
2008189	2	1.14608356789068e-16	1.70698182767495e-16
2008189	3	9.39233591479886e-17	1.409885476347e-16
2008189	4	8.78096952022035e-17	1.3128223942937e-16
2008189	5	1.09976246392644e-16	1.56576786063598e-16
2008189	6	1.19974598754988e-16	1.68196036162253e-16
2008189	7	1.23945035762006e-16	1.73624434665663e-16
2008189	8	1.21551844970913e-16	1.68507066685863e-16
2008189	9	1.17513907460751e-16	1.55900744888402e-16
2008189	10	1.11744458591002e-16	1.4370185551263e-16
2008189	11	1.15075612427653e-16	1.54718344201649e-16
2008189	12	1.19293106368578e-16	1.62060326906699e-16
2008189	13	1.20299134454879e-16	1.68387672577011e-16
2008189	14	1.13937567414151e-16	1.64003837103788e-16
2008189	15	1.16997263326654e-16	1.68812539858954e-16
2008189	16	1.1668074845614e-16	1.68109178934823e-16
2008189	17	1.13844827968687e-16	1.68120556308314e-16
2008189	18	1.05972263874636e-16	1.54938116327558e-16
2008189	19	8.77790543243905e-17	1.27259335361627e-16
2008189	20	8.93356544222174e-17	1.35106932189569e-16
2008189	21	9.68553291272446e-17	1.49079143906493e-16
2008189	22	8.58820517426592e-17	1.33285802495255e-16
2008189	23	1.11618529241315e-16	1.68023532952426e-16
2008190	0	1.13624993678089e-16	1.67675485382634e-16
2008190	1	1.06104728008836e-16	1.55617783853756e-16
2008190	2	7.29578539213986e-17	1.11138872038259e-16
2008190	3	8.25543125155255e-17	1.25984198178312e-16
2008190	4	9.30079863963721e-17	1.38953748958075e-16
2008190	5	8.81229101118696e-17	1.30399608443358e-16
2008190	6	1.10982759443409e-16	1.60732159252289e-16
2008190	7	1.20247648737457e-16	1.6964897277113e-16
2008190	8	1.22669285827004e-16	1.73100587721509e-16
2008190	9	1.14721852527479e-16	1.56829077380547e-16
2008190	10	1.06677620985447e-16	1.4643564972682e-16
2008190	11	1.05141073765106e-16	1.45279885190415e-16
2008190	12	1.05480585608973e-16	1.47951674242277e-16
2008190	13	1.05542122788249e-16	1.49340515609449e-16
2008190	14	1.07213348882788e-16	1.54557173835685e-16
2008190	15	1.10985907575187e-16	1.59566544951452e-16
2008190	16	1.13054421764667e-16	1.59157468757614e-16
2008190	17	1.16200232340371e-16	1.5652232276964e-16
2008190	18	1.09451256459997e-16	1.44192020012668e-16
2008190	19	1.07541517636911e-16	1.41740537378843e-16
2008190	20	1.0773303897884e-16	1.44193668088246e-16
2008190	21	1.10260904787981e-16	1.50711638946878e-16
2008190	22	1.20700825627975e-16	1.69727355208397e-16
2008190	23	1.215515767936e-16	1.70790611321149e-16
2008191	0	1.20692982881387e-16	1.64560407900679e-16
2008191	1	1.14242432835277e-16	1.55503823605741e-16
2008191	2	1.12304906371258e-16	1.55146987222022e-16
2008191	3	1.15507862409604e-16	1.64187268905768e-16
2008191	4	1.09865218552873e-16	1.56498206994002e-16
2008191	5	1.05870088752911e-16	1.5035162481968e-16
2008191	6	1.13268530827679e-16	1.60997636340488e-16
2008191	7	1.20415011469344e-16	1.7143075711588e-16
2008191	8	1.21158025618728e-16	1.7316059628384e-16
2008191	9	1.1774876217798e-16	1.66640729686833e-16
2008191	10	1.14703454631771e-16	1.60795873649451e-16
2008191	11	1.11971837934587e-16	1.56796225643539e-16
2008191	12	1.08972828476156e-16	1.52121556984032e-16
2008191	13	1.05991715380323e-16	1.47085901516323e-16
2008191	14	1.0616159452193e-16	1.48397637907627e-16
2008191	15	1.0966997825633e-16	1.54525663037109e-16
2008191	16	1.10608198429701e-16	1.5557350863017e-16
2008191	17	1.13016837558803e-16	1.61137266597677e-16
2008191	18	1.19457640192157e-16	1.75165980725098e-16
2008191	19	1.19134145352432e-16	1.75193184491862e-16
2008191	20	1.1945245258451e-16	1.75085442458127e-16
2008191	21	1.19148523162456e-16	1.74685942934084e-16
2008191	22	1.1795552613055e-16	1.73554505489746e-16
2008191	23	1.16056712454079e-16	1.73605292850669e-16
2008192	0	1.16452950962967e-16	1.73662907513112e-16
2008192	1	1.1698697294003e-16	1.73684099947762e-16
2008192	2	1.19085515583864e-16	1.74391987847769e-16
2008192	3	1.0142334146944e-16	1.41789617475989e-16
2008192	4	6.96688888504405e-17	9.18526031474612e-17
2008192	5	3.84813911113761e-17	4.03757443773185e-17
2008192	6	3.31668906641879e-17	3.44696102200061e-17
2008192	7	3.38964129781172e-17	3.60952070136734e-17
2008192	8	3.97513158434847e-17	4.42335111695786e-17
2008192	9	4.28932487073427e-17	4.98726794306057e-17
2008192	10	4.81526534296898e-17	6.08019117497871e-17
2008192	11	5.66663720490543e-17	7.4656826612087e-17
2008192	12	6.0037147159781e-17	7.94647766809906e-17
2008192	13	6.21547173620488e-17	8.44417260051628e-17
2008192	14	6.98810417110338e-17	9.52319712934533e-17
2008192	15	1.21545957857269e-16	1.70094771585472e-16
2008192	16	1.22094496384899e-16	1.69923174241368e-16
2008192	17	1.2362834927721e-16	1.69913016178101e-16
2008192	18	1.23544596348911e-16	1.69553330361391e-16
2008192	19	1.23332041101529e-16	1.69399180415901e-16
2008192	20	1.23504433878577e-16	1.69664590578182e-16
2008192	21	1.24024821372313e-16	1.69781851437282e-16
2008192	22	1.23764966154272e-16	1.697995084417e-16
2008192	23	1.23646651149885e-16	1.69889511911771e-16
2008193	0	1.23345753017016e-16	1.69959565690357e-16
2008193	1	1.23076057431506e-16	1.69635992785139e-16
2008193	2	1.22742111258415e-16	1.69643238388826e-16
2008193	3	1.15664343931157e-16	1.60802151998903e-16
2008193	4	1.08262026071671e-16	1.49667176041701e-16
2008193	5	1.150422499232e-16	1.5817860597684e-16
2008193	6	1.13455560033443e-16	1.55205900408364e-16
2008193	7	1.01359165443695e-16	1.37812672044615e-16
2008193	8	9.28385333513947e-17	1.25938550387908e-16
2008193	9	1.04495235483414e-16	1.41995821579607e-16
2008193	10	1.05714576497989e-16	1.45047977199089e-16
2008193	11	1.11833552676706e-16	1.5551048238418e-16
2008193	12	1.12324872901399e-16	1.56816101597786e-16
2008193	13	1.22804985151861e-16	1.69241501414037e-16
2008193	14	1.2398222654941e-16	1.69315093129998e-16
2008193	15	1.2718015468898e-16	1.72886357064521e-16
2008193	16	1.27294616906797e-16	1.73032427242711e-16
2008193	17	1.26000137756946e-16	1.7169215748473e-16
2008193	18	1.23044693631985e-16	1.67527085905484e-16
2008193	19	1.20457530028875e-16	1.63096305860523e-16
2008193	20	1.20005373075215e-16	1.62374096653768e-16
2008193	21	1.21380210774651e-16	1.65870428066842e-16
2008193	22	1.22375702502486e-16	1.65507268202374e-16
2008193	23	1.20787462978364e-16	1.60369464092173e-16
2008194	0	1.19587020804612e-16	1.60201036818536e-16
2008194	1	1.22224372315786e-16	1.65042718131767e-16
2008194	2	1.22165463632269e-16	1.65637074518967e-16
2008194	3	1.23020171221634e-16	1.70602641719388e-16
2008194	4	1.20158871547233e-16	1.6878610528166e-16
2008194	5	1.20285731551014e-16	1.70565966717528e-16
2008194	6	1.13405335603451e-16	1.55493789137016e-16
2008194	7	1.0820341944511e-16	1.53928617666078e-16
2008194	8	8.53006136559444e-17	1.24506452332972e-16
2008194	9	1.08434018370092e-16	1.57278743773632e-16
2008194	10	1.02857774608138e-16	1.57357883097764e-16
2008194	11	9.90442768466028e-17	1.44504055756542e-16
2008194	12	1.18675264401823e-16	1.70750520562436e-16
2008194	13	1.23232296220213e-16	1.71588165313244e-16
2008194	14	1.25468326941309e-16	1.71728017512152e-16
2008194	15	1.25973391410664e-16	1.71768126605527e-16
2008194	16	1.31147261680132e-16	1.76435756596727e-16
2008194	17	1.2803392834176e-16	1.7142799558614e-16
2008194	18	1.26232319679512e-16	1.68500216380182e-16
2008194	19	1.20804153430134e-16	1.62385050467492e-16
2008194	20	9.83863895787355e-17	1.38505319945462e-16
2008194	21	8.26100711624055e-17	1.12408584080737e-16
2008194	22	7.38761514380799e-17	9.61283141078699e-17
2008194	23	7.08059562788291e-17	9.26271156730254e-17
2008195	0	7.8679132243533e-17	1.06732054469948e-16
2008195	1	1.08801210477501e-16	1.52495846796786e-16
2008195	2	1.15725747848097e-16	1.59323595951046e-16
2008195	3	8.38899029612261e-17	1.12041773596556e-16
2008195	4	6.87565578311676e-17	9.0775720092982e-17
2008195	5	6.88564153201575e-17	9.2248258897019e-17
2008195	6	7.62634812327599e-17	1.03031212203563e-16
2008195	7	8.91319125602056e-17	1.22540118723678e-16
2008195	8	8.89381702167371e-17	1.22851922091936e-16
2008195	9	9.59429806998117e-17	1.31315046307573e-16
2008195	10	9.63685424165064e-17	1.29757035760073e-16
2008195	11	8.18926107732806e-17	1.07003016771833e-16
2008195	12	7.25189529815739e-17	9.23773637029048e-17
2008195	13	6.55016155138656e-17	8.47464010568684e-17
2008195	14	9.00135847004589e-17	1.25885496223185e-16
2008195	15	9.12986280003756e-17	1.32152447390042e-16
2008195	16	8.47449817300214e-17	1.22635873102572e-16
2008195	17	9.01213182367333e-17	1.29382602076612e-16
2008195	18	1.12990559852957e-16	1.61858210978389e-16
2008195	19	1.2208481848252e-16	1.72396151196594e-16
2008195	20	1.22229523341292e-16	1.72781311112473e-16
2008195	21	1.2204452837125e-16	1.72541431616509e-16
2008195	22	1.21501142621865e-16	1.72386589127105e-16
2008195	23	1.20416141937137e-16	1.72247460009851e-16
2008196	0	1.19886345207448e-16	1.72115656081492e-16
2008196	1	1.19823481516539e-16	1.71924136709844e-16
2008196	2	1.20402773387367e-16	1.7191717591225e-16
2008196	3	1.20560464755695e-16	1.71820273845341e-16
2008196	4	1.20581451823454e-16	1.72112170491466e-16
2008196	5	1.21108776395669e-16	1.72567848437882e-16
2008196	6	1.21010273539732e-16	1.72682151515595e-16
2008196	7	1.2219890773439e-16	1.75967291317493e-16
2008196	8	1.24811453131598e-16	1.78689092000517e-16
2008196	9	1.2382435491609e-16	1.78264825236963e-16
2008196	10	1.21332822991216e-16	1.73368712692011e-16
2008196	11	1.20771447170311e-16	1.72999811835654e-16
2008196	12	1.20347950410808e-16	1.73134786122333e-16
2008196	13	1.04121525609844e-16	1.4035553141878e-16
2008196	14	8.93574823664717e-17	1.14508585987062e-16
2008196	15	6.92659053914795e-17	9.00390800787354e-17
2008196	16	5.1599176872391e-17	6.68495286450836e-17
2008196	17	3.83346701087849e-17	4.73706389145075e-17
2008196	18	3.13538349763483e-17	3.90383848347875e-17
2008196	19	4.89274913386288e-17	6.32041531141635e-17
2008196	20	1.25407188176025e-16	1.72302085144451e-16
2008196	21	1.25442216630607e-16	1.71704363762708e-16
2008196	22	1.25761634560411e-16	1.71403272080082e-16
2008196	23	1.00103061045743e-16	1.34278957453177e-16
2008197	0	6.14835579144019e-17	8.07535439322404e-17
2008197	1	3.33539633864025e-17	4.30231105284202e-17
2008197	2	1.70272592482287e-17	2.16535581643021e-17
2008197	3	8.28337303265803e-18	1.03685162948942e-17
2008197	4	3.87485743278786e-18	4.76620265930025e-18
2008197	5	1.84824921058609e-18	2.21558357031692e-18
2008197	6	1.12344269671274e-18	1.29763036956594e-18
2008197	7	1.25957695891515e-18	1.41158331282681e-18
2008197	8	2.09670567930203e-18	2.35112317900055e-18
2008197	9	3.42888420357839e-18	4.04195034797966e-18
2008197	10	5.55106820012356e-18	6.62815519004434e-18
2008197	11	9.09155708366401e-18	1.11687829551704e-17
2008197	12	1.35152553000648e-17	1.70827488398085e-17
2008197	13	1.81451056051581e-17	2.35277187969228e-17
2008197	14	2.18617570390514e-17	3.00120124538213e-17
2008197	15	3.2091888078644e-17	4.44707905898393e-17
2008197	16	1.25723853546722e-16	1.81519011582823e-16
2008197	17	1.26933210773012e-16	1.82030623517191e-16
2008197	18	1.26488048578203e-16	1.79463636172566e-16
2008197	19	1.23913254292324e-16	1.72742539569908e-16
2008197	20	1.23194354061368e-16	1.70921926231778e-16
2008197	21	1.23264790618615e-16	1.70977776613758e-16
2008197	22	1.18462552724437e-16	1.63623511227781e-16
2008197	23	1.08457470679913e-16	1.52203956190353e-16
2008198	0	1.12679606734817e-16	1.57765662150328e-16
2008198	1	1.22216043609004e-16	1.70406576665699e-16
2008198	2	1.0540640000625e-16	1.4430857214916e-16
2008198	3	1.2267895550034e-16	1.69763822878497e-16
2008198	4	1.25265143172352e-16	1.70324408754166e-16
2008198	5	1.13498276676692e-16	1.51748976898569e-16
2008198	6	7.48825759771906e-17	9.63311381004436e-17
2008198	7	4.89069846480344e-17	5.99626038541526e-17
2008198	8	3.50361496092335e-17	4.08717552092648e-17
2008198	9	2.67469576218827e-17	2.99671904361529e-17
2008198	10	2.22691608580782e-17	2.43672521555807e-17
2008198	11	2.09258146827795e-17	2.30163496487738e-17
2008198	12	2.27105850165852e-17	2.59125765642023e-17
2008198	13	3.25328664296275e-17	3.98133079455947e-17
2008198	14	4.98632847956588e-17	6.41978308604438e-17
2008198	15	7.38005724532625e-17	9.75074993125144e-17
2008198	16	1.08176692141178e-16	1.45262238500675e-16
2008198	17	1.12568706119121e-16	1.52910687938007e-16
2008198	18	1.154511870618e-16	1.56596578614473e-16
2008198	19	1.26836234117832e-16	1.7214257747656e-16
2008198	20	1.15537707874974e-16	1.52982569087253e-16
2008198	21	1.05111287509883e-16	1.36571706633263e-16
2008198	22	9.75478359670616e-17	1.25374784076733e-16
2008198	23	9.12590227860485e-17	1.16771743761732e-16
2008199	0	8.49001932400573e-17	1.0777161156241e-16
2008199	1	7.83565197069826e-17	9.76586630802247e-17
2008199	2	7.04499314222601e-17	8.67049728280835e-17
2008199	3	6.21140652572952e-17	7.54575848549227e-17
2008199	4	5.54439517140255e-17	6.68218207667199e-17
2008199	5	5.16155223291585e-17	6.20272792413644e-17
2008199	6	5.00349258427759e-17	6.0312817349589e-17
2008199	7	5.13019182140571e-17	6.24888156379539e-17
2008199	8	5.83959169065004e-17	7.26532048925275e-17
2008199	9	6.90139489838969e-17	8.71806893336809e-17
2008199	10	7.89559045136561e-17	1.01048462666899e-16
2008199	11	8.41255724693479e-17	1.08454022636467e-16
2008199	12	8.61574777539285e-17	1.12489285568884e-16
2008199	13	9.31797125732256e-17	1.255312807672e-16
2008199	14	1.03462858676089e-16	1.44933298160138e-16
2008199	15	1.08773907719267e-16	1.55201993765636e-16
2008199	16	1.10784579933362e-16	1.61772453911888e-16
2008199	17	1.11236310902991e-16	1.63251396627989e-16
2008199	18	1.13624800002399e-16	1.65242754765495e-16
2008199	19	1.16738479127093e-16	1.60717096968277e-16
2008199	20	1.12810643028574e-16	1.58175573411671e-16
2008199	21	6.68445080871102e-17	9.58620683269131e-17
2008199	22	9.09103541518455e-17	1.3284981271688e-16
2008199	23	4.9353460303735e-17	6.63851431555305e-17
2008200	0	4.10155066375085e-17	5.30249457842211e-17
2008200	1	4.04266768805335e-17	4.90889574801496e-17
2008200	2	7.98259435629957e-17	1.14835811763018e-16
2008200	3	1.20350376281166e-16	1.70774685113159e-16
2008200	4	1.17949359393245e-16	1.70592119143532e-16
2008200	5	1.03849290287229e-16	1.50530650310737e-16
2008200	6	8.80027411610213e-17	1.31760923965638e-16
2008200	7	9.15828586613666e-17	1.37666776358953e-16
2008200	8	1.00716300335739e-16	1.51296559767416e-16
2008200	9	1.06232102188814e-16	1.58894650304521e-16
2008200	10	1.10191458274805e-16	1.61462792042867e-16
2008200	11	1.140129900175e-16	1.64706568951687e-16
2008200	12	1.20889144248026e-16	1.73924928523801e-16
2008200	13	1.22728600202477e-16	1.73680615323715e-16
2008200	14	1.2420815803714e-16	1.73730578988632e-16
2008200	15	1.23822801822083e-16	1.74239682878992e-16
2008200	16	1.23023145402687e-16	1.74319240587899e-16
2008200	17	1.23077426459963e-16	1.7431836333082e-16
2008200	18	1.23114284370265e-16	1.74461229344378e-16
2008200	19	1.23067233177009e-16	1.74555645250621e-16
2008200	20	1.23987967589124e-16	1.75879146702332e-16
2008200	21	1.24869788825854e-16	1.7710905473355e-16
2008200	22	1.25400335224864e-16	1.77972624617511e-16
2008200	23	1.25628198388589e-16	1.78554907897238e-16
2008201	0	1.24924659857493e-16	1.7785423582678e-16
2008201	1	1.23526055142021e-16	1.77401646771197e-16
2008201	2	1.19319690856689e-16	1.77380802889827e-16
2008201	3	1.13857990904468e-16	1.78268334589371e-16
2008201	4	9.69863220162327e-17	1.58232228233045e-16
2008201	5	9.50356617202556e-17	1.42822297816068e-16
2008201	6	4.38495222510423e-17	6.36365123359955e-17
2008201	7	5.91055536925189e-17	8.53776791274318e-17
2008201	8	9.45432203134527e-17	1.34104299393919e-16
2008201	9	1.14315851220827e-16	1.60396732839881e-16
2008201	10	1.21577579080195e-16	1.69625951072019e-16
2008201	11	1.2098501127339e-16	1.691193171e-16
2008201	12	1.04208070519577e-16	1.48669445377664e-16
2008201	13	1.01719592234292e-16	1.43417555681735e-16
2008201	14	1.04150933848386e-16	1.45422422515914e-16
2008201	15	9.9754693769557e-17	1.40131742079862e-16
2008201	16	1.09603742747951e-16	1.51419111174265e-16
2008201	17	1.08241589591241e-16	1.49921309824116e-16
2008201	18	1.09568529620155e-16	1.52975892884604e-16
2008201	19	1.20237405880238e-16	1.69567257942428e-16
2008201	20	1.18405276593939e-16	1.69298189281606e-16
2008201	21	1.19266220733043e-16	1.69099821888651e-16
2008201	22	1.23165245187069e-16	1.75004389849168e-16
2008201	23	1.20197576860787e-16	1.70614993757593e-16
2008202	0	1.19058218407212e-16	1.6660990566212e-16
2008202	1	1.21047985587804e-16	1.70206009565983e-16
2008202	2	1.10330793418276e-16	1.55816685159703e-16
2008202	3	7.94908824557979e-17	1.12550981097686e-16
2008202	4	9.68195124549005e-17	1.38170507270721e-16
2008202	5	1.22402230473934e-16	1.71290280349094e-16
2008202	6	5.13695078693248e-17	6.68685088189733e-17
2008202	7	1.19620771420116e-16	1.70097242768494e-16
2008202	8	1.17284666458025e-16	1.69883721615063e-16
2008202	9	1.14628748405548e-16	1.69859127455266e-16
2008202	10	1.1242931340269e-16	1.69941290917721e-16
2008202	11	1.1639399943307e-16	1.6999703464838e-16
2008202	12	1.13600024771905e-16	1.61720279270518e-16
2008202	13	8.86642353286121e-17	1.28330789917268e-16
2008202	14	3.99561064499641e-17	5.78889757910082e-17
2008202	15	7.28511394439069e-17	1.04673698457577e-16
2008202	16	1.18780559216709e-16	1.71117122138772e-16
2008202	17	1.18340786819058e-16	1.71033552255671e-16
2008202	18	1.18847061508396e-16	1.71374672086605e-16
2008202	19	1.13734497925457e-16	1.65292257771289e-16
2008202	20	1.16318276179156e-16	1.71500530804238e-16
2008202	21	1.13844219026109e-16	1.71181256747928e-16
2008202	22	1.12569977338494e-16	1.71123822943752e-16
2008202	23	1.1406601416358e-16	1.70390713079567e-16
2008203	0	9.55326319076662e-17	1.36397420748057e-16
2008203	1	7.52649613579035e-17	1.08734776561982e-16
2008203	2	1.0152362755034e-16	1.48920064157639e-16
2008203	3	1.14903369432951e-16	1.69281662461044e-16
2008203	4	1.08782270691143e-16	1.61741460200437e-16
2008203	5	1.1536104889762e-16	1.68965249211092e-16
2008203	6	1.164906152206e-16	1.68424702586516e-16
2008203	7	1.1870556219866e-16	1.68234223869171e-16
2008203	8	1.17268517933191e-16	1.68050555778065e-16
2008203	9	1.18708767629672e-16	1.68241128829983e-16
2008203	10	1.19109277901388e-16	1.67981897808759e-16
2008203	11	1.19825023042691e-16	1.67837561221436e-16
2008203	12	1.20577838304011e-16	1.67734683231585e-16
2008203	13	1.20332836149999e-16	1.6766721815747e-16
2008203	14	1.22138181987876e-16	1.70041715378698e-16
2008203	15	1.2003551947939e-16	1.68425783592059e-16
2008203	16	1.18426894681453e-16	1.67441686094844e-16
2008203	17	1.19737228306436e-16	1.69443131005952e-16
2008203	18	1.17849513065721e-16	1.67561593337932e-16
2008203	19	1.18156975390427e-16	1.67733296359673e-16
2008203	20	1.17692113700075e-16	1.68831909220594e-16
2008203	21	1.19542893154183e-16	1.73845948845302e-16
2008203	22	1.20221635018022e-16	1.78249099325669e-16
2008203	23	1.23757627552194e-16	1.78840449361447e-16
2008204	0	1.2475576927113e-16	1.788378561687e-16
2008204	1	1.25493636868351e-16	1.79344232415144e-16
2008204	2	1.25816442999541e-16	1.79960599670964e-16
2008204	3	8.09668684995225e-17	1.11124271801714e-16
2008204	4	6.93492048591076e-17	9.01987392665478e-17
2008204	5	6.99736853644415e-17	8.84735112896341e-17
2008204	6	7.39182667050866e-17	9.24900285741304e-17
2008204	7	8.13232529700151e-17	9.97506518177252e-17
2008204	8	8.90491988977767e-17	1.10691729644108e-16
2008204	9	9.04212898882523e-17	1.13121713042563e-16
2008204	10	9.83464600221106e-17	1.24738297487715e-16
2008204	11	1.25613303802787e-16	1.69730164696754e-16
2008204	12	1.25455961082146e-16	1.70488587153509e-16
2008204	13	1.25496789067353e-16	1.70784258662499e-16
2008204	14	1.26004806533774e-16	1.71319299608217e-16
2008204	15	1.26335328929349e-16	1.71453791899688e-16
2008204	16	1.26467707348051e-16	1.71175921258516e-16
2008204	17	8.16630801156477e-17	1.06333235125328e-16
2008204	18	4.54615367196464e-17	5.5852029603735e-17
2008204	19	2.80690579036678e-17	3.28081814351935e-17
2008204	20	1.96413681986413e-17	2.22461634256713e-17
2008204	21	1.51402114836972e-17	1.6819844412977e-17
2008204	22	1.23500269920472e-17	1.36594926855868e-17
2008204	23	1.05896534770716e-17	1.1574778617583e-17
2008205	0	9.24611682898215e-18	1.00878499080094e-17
2008205	1	8.1856632194114e-18	8.9467447212099e-18
2008205	2	7.23682480240742e-18	7.94144398235283e-18
2008205	3	6.34426726926716e-18	6.93750675596669e-18
2008205	4	5.41065729710011e-18	5.8820243589412e-18
2008205	5	4.40263502767197e-18	4.78658452905844e-18
2008205	6	3.56553188109684e-18	3.85813547238313e-18
2008205	7	2.9114156758381e-18	3.14670917577889e-18
2008205	8	2.39651364584165e-18	2.59670961021911e-18
2008205	9	1.99924778377773e-18	2.17612000871276e-18
2008205	10	1.71439842265041e-18	1.87820978306081e-18
2008205	11	1.48890839112031e-18	1.64156287647764e-18
2008205	12	1.32105523184486e-18	1.46263293398463e-18
2008205	13	1.17568772880303e-18	1.30166779609344e-18
2008205	14	1.06224573326196e-18	1.17221491196135e-18
2008205	15	9.68046588077838e-19	1.06595791769922e-18
2008205	16	8.90838914255885e-19	9.80210488536818e-19
2008205	17	8.3362851841557e-19	9.16898498583959e-19
2008205	18	7.99184203279769e-19	8.79942283725115e-19
2008205	19	7.81531909167073e-19	8.61972658413101e-19
2008205	20	7.72517240054707e-19	8.50898187838406e-19
2008205	21	7.6388853942874e-19	8.40753645237842e-19
2008205	22	7.57498092299989e-19	8.32194486479987e-19
2008205	23	7.53344153922489e-19	8.25916520415442e-19
2008206	0	7.52377136074353e-19	8.25016665422836e-19
2008206	1	7.64941954901332e-19	8.38678356084201e-19
2008206	2	8.61223370192862e-19	9.67160461108557e-19
2008206	3	1.00162306759742e-18	1.16536422481738e-18
2008206	4	1.19683434656133e-18	1.44563915586264e-18
2008206	5	1.38772604642103e-18	1.72399503092953e-18
2008206	6	1.4347180829613e-18	1.79998735979502e-18
2008206	7	1.47834481817969e-18	1.85836734640119e-18
2008206	8	2.0084210659004e-18	2.59398973039575e-18
2008206	9	3.62511647298853e-18	4.9053284702538e-18
2008206	10	8.13294008080668e-18	1.13694474862944e-17
2008206	11	1.74423689042155e-17	2.45810306154306e-17
2008206	12	3.04124358366303e-17	4.28060945973481e-17
2008206	13	4.5565810381177e-17	6.3764472885553e-17
2008206	14	6.35144684496754e-17	8.68426119677262e-17
2008206	15	7.98135524349243e-17	1.05467105273212e-16
2008206	16	9.26080077656523e-17	1.19038525325176e-16
2008206	17	9.83923184657892e-17	1.23310860418923e-16
2008206	18	9.81631671049143e-17	1.19338421223609e-16
2008206	19	9.52264996123855e-17	1.11489319631899e-16
2008206	20	8.99168569498668e-17	1.03323235340669e-16
2008206	21	8.3263250999798e-17	9.4009592257181e-17
2008206	22	7.12734024610643e-17	7.90479955419305e-17
2008206	23	5.8297040362334e-17	6.43066228482076e-17
2008207	0	4.90124983894031e-17	5.40346860776877e-17
2008207	1	4.32523663304372e-17	4.75364065019522e-17
2008207	2	4.08164258880227e-17	4.47838443582161e-17
2008207	3	3.99472977904087e-17	4.37049522624735e-17
2008207	4	3.91778244345261e-17	4.23757549630801e-17
2008207	5	3.81185041367531e-17	4.08051100402718e-17
2008207	6	3.68926660990452e-17	3.91789124761669e-17
2008207	7	3.59574925022379e-17	3.79389589844911e-17
2008207	8	3.7050693324905e-17	3.90741423662164e-17
2008207	9	4.11969565670397e-17	4.36219843359128e-17
2008207	10	4.88311549246135e-17	5.19650534434729e-17
2008207	11	5.64356458749798e-17	6.02409418998118e-17
2008207	12	6.40479562675618e-17	6.86172112809934e-17
2008207	13	6.87597328836534e-17	7.38596293460273e-17
2008207	14	6.99457345818833e-17	7.53238127031472e-17
2008207	15	6.96163521703863e-17	7.46413250171096e-17
2008207	16	6.82142291648222e-17	7.2640007326844e-17
2008207	17	6.73146123334908e-17	7.13810939351341e-17
2008207	18	6.75181606648848e-17	7.15137433124905e-17
2008207	19	6.85427339224971e-17	7.2775095197638e-17
2008207	20	7.0259426958765e-17	7.47939708377186e-17
2008207	21	7.19001032882153e-17	7.68535653978975e-17
2008207	22	7.37903958627468e-17	7.90015964903237e-17
2008207	23	7.52591125623301e-17	8.08971502094522e-17
2008208	0	7.62574206443175e-17	8.21458859697783e-17
2008208	1	7.64851204835309e-17	8.22469674628855e-17
2008208	2	7.63223399327045e-17	8.17805258070386e-17
2008208	3	7.59128474984587e-17	8.09184203599612e-17
2008208	4	7.60059544508215e-17	8.05811455862934e-17
2008208	5	7.71104157951183e-17	8.18426687788561e-17
2008208	6	7.99129446467968e-17	8.51354538947812e-17
2008208	7	8.27523114694901e-17	8.86219302341254e-17
2008208	8	8.30252736618308e-17	8.94685798804555e-17
2008208	9	8.13558900361313e-17	8.80976731550704e-17
2008208	10	7.98608499368745e-17	8.68361146971043e-17
2008208	11	8.02580255343066e-17	8.76577034014137e-17
2008208	12	8.2798358747321e-17	9.13617501739848e-17
2008208	13	8.19277971213081e-17	8.98534769367014e-17
2008208	14	7.83570193416345e-17	8.4642858063886e-17
2008208	15	7.5632235231993e-17	8.0968126593836e-17
2008208	16	7.50780102057012e-17	7.97822220863544e-17
2008208	17	7.59114482640255e-17	8.06438146803077e-17
2008208	18	7.8405822875871e-17	8.39288955752947e-17
2008208	19	8.14346788797505e-17	8.81247881878892e-17
2008208	20	8.42331505729412e-17	9.21682464976515e-17
2008208	21	8.59923307988144e-17	9.48926859610062e-17
2008208	22	8.61415081955e-17	9.55098557525393e-17
2008208	23	8.55695947238662e-17	9.42348464467631e-17
2008209	0	8.43614410228278e-17	9.21737250114237e-17
2008209	1	8.25477347147518e-17	9.01835325430864e-17
2008209	2	8.02020172981827e-17	8.75504806547874e-17
2008209	3	7.70810125643002e-17	8.36973894290191e-17
2008209	4	7.2925166663982e-17	7.89403782085697e-17
2008209	5	6.93333024136786e-17	7.38199224651407e-17
2008209	6	6.60297258508133e-17	6.87930183999381e-17
2008209	7	6.24887821795739e-17	6.44637702116334e-17
2008209	8	6.24390836455459e-17	6.54603767429657e-17
2008209	9	6.21239839250893e-17	6.51520943632927e-17
2008209	10	6.00416956888722e-17	6.23724387720187e-17
2008209	11	5.7935761000192e-17	6.00202366183146e-17
2008209	12	5.5899393152955e-17	5.80295250831768e-17
2008209	13	5.42649557548728e-17	5.65034122535981e-17
2008209	14	5.28850736698576e-17	5.52215533178002e-17
2008209	15	5.19843797800305e-17	5.42523667065092e-17
2008209	16	5.14461854737395e-17	5.35536133896887e-17
2008209	17	5.23232467672662e-17	5.4516939961486e-17
2008209	18	5.41943648143937e-17	5.67136882582662e-17
2008209	19	5.6952627091749e-17	5.99887539512699e-17
2008209	20	6.0089994442903e-17	6.360604907591e-17
2008209	21	6.29857829049129e-17	6.67839721504341e-17
2008209	22	6.52754021544545e-17	6.92607404648849e-17
2008209	23	6.78055614037389e-17	7.18853588949537e-17
2008210	0	6.94871427558021e-17	7.33764389949374e-17
2008210	1	6.98510319054947e-17	7.34803522337902e-17
2008210	2	6.95642567346836e-17	7.29168097077144e-17
2008210	3	6.91109372740634e-17	7.23025597878996e-17
2008210	4	6.91286794599285e-17	7.21442794402251e-17
2008210	5	6.92299294262121e-17	7.18966279229077e-17
2008210	6	6.93305038705483e-17	7.17071412762371e-17
2008210	7	6.97599907078617e-17	7.19333565402156e-17
2008210	8	7.02332060926351e-17	7.23878249647931e-17
2008210	9	7.03032816330637e-17	7.29167628840045e-17
2008210	10	7.07109016103317e-17	7.41035841271155e-17
2008210	11	7.17443276837029e-17	7.62806553588143e-17
2008210	12	7.29991856799941e-17	7.90721325684341e-17
2008210	13	7.5121929242189e-17	8.20705837466024e-17
2008210	14	7.7485490712979e-17	8.52417416934548e-17
2008210	15	7.95918717525418e-17	8.80984731925329e-17
2008210	16	8.14883427368025e-17	9.08667503551259e-17
2008210	17	8.30076408740706e-17	9.30215361853025e-17
2008210	18	8.40355909519862e-17	9.49514667798536e-17
2008210	19	8.56564789631822e-17	9.73281384683164e-17
2008210	20	8.82145204101547e-17	9.94741875921522e-17
2008210	21	9.00762838228598e-17	1.00008226761684e-16
2008210	22	9.08378940487402e-17	9.90181443263311e-17
2008210	23	9.02896041879361e-17	9.76861125144297e-17
2008211	0	9.03687224262629e-17	9.68797492570173e-17
2008211	1	9.02325617590084e-17	9.62095076721543e-17
2008211	2	8.96986136139241e-17	9.51263322069868e-17
2008211	3	8.85900466321647e-17	9.37019405980838e-17
2008211	4	8.70719529162687e-17	9.20609723712576e-17
2008211	5	8.54674290753721e-17	9.02719892174168e-17
2008211	6	8.3723372141688e-17	8.82383868492572e-17
2008211	7	8.09907440649072e-17	8.54631386874056e-17
2008211	8	7.83453633749083e-17	8.30296348395648e-17
2008211	9	7.59385717586248e-17	8.11990323690635e-17
2008211	10	7.21808347363446e-17	7.76414379027902e-17
2008211	11	6.79661209290399e-17	7.43054189514755e-17
2008211	12	6.30638697220872e-17	7.00044589795081e-17
2008211	13	5.85895258510939e-17	6.50626288195294e-17
2008211	14	5.39248555967098e-17	5.93286567673627e-17
2008211	15	4.93587501102038e-17	5.34125822687517e-17
2008211	16	4.478538610501e-17	4.77774410577211e-17
2008211	17	4.00520417489186e-17	4.24074883028509e-17
2008211	18	3.49917172475193e-17	3.73852699201864e-17
2008211	19	3.07994699964593e-17	3.29986136905956e-17
2008211	20	2.76456892035462e-17	2.97084983954871e-17
2008211	21	2.51476264495011e-17	2.72186959460112e-17
2008211	22	2.27177595983544e-17	2.46599347343103e-17
2008211	23	2.12508790558066e-17	2.30254222957877e-17
2008212	0	2.02473294223833e-17	2.18497539309822e-17
2008212	1	1.89969202377671e-17	2.04072530209942e-17
2008212	2	1.84504980992305e-17	1.99744095975841e-17
2008212	3	1.9287756828436e-17	2.12113241333664e-17
2008212	4	2.47176049392123e-17	2.85784991418918e-17
2008212	5	4.78571003106786e-17	6.0022452803859e-17
2008212	6	5.24346317354799e-17	6.61068262042362e-17
2008212	7	1.20421808810357e-16	1.61067850076763e-16
2008212	8	6.19330652058607e-17	7.82141938726366e-17
2008212	9	7.22886692501126e-17	9.21524386083625e-17
2008212	10	6.86002076687999e-17	8.62960619963038e-17
2008212	11	5.1874815766057e-17	6.22116976984363e-17
2008212	12	4.10304721561579e-17	4.67859151931113e-17
2008212	13	3.57151397656959e-17	3.92119234537228e-17
2008212	14	3.34089909248457e-17	3.58888849098711e-17
2008212	15	3.28093116508764e-17	3.49137171274061e-17
2008212	16	3.29431957446405e-17	3.49026943043378e-17
2008212	17	3.317732592934e-17	3.50126535121006e-17
2008212	18	3.32660445540901e-17	3.50422394924887e-17
2008212	19	3.35988816642821e-17	3.54594146501502e-17
2008212	20	3.4373376492394e-17	3.63685751120725e-17
2008212	21	3.54372081135664e-17	3.75501535162907e-17
2008212	22	3.64801677705549e-17	3.87390579912116e-17
2008212	23	3.75755757601443e-17	4.00642454954828e-17
2008213	0	3.88134421213708e-17	4.13774337008364e-17
2008213	1	3.96839370948383e-17	4.22892751188434e-17
2008213	2	4.03578649215227e-17	4.27601626274349e-17
2008213	3	4.09390376167446e-17	4.31765068933314e-17
2008213	4	4.17271924539696e-17	4.38859174481233e-17
2008213	5	4.27634056380089e-17	4.48520840610352e-17
2008213	6	4.43163418964251e-17	4.64334605261107e-17
2008213	7	4.56519626164973e-17	4.77851544564657e-17
2008213	8	4.65799832723214e-17	4.86074984911166e-17
2008213	9	4.77796611738047e-17	4.98764730073571e-17
2008213	10	4.91348621554932e-17	5.13699396949737e-17
2008213	11	4.96912001711388e-17	5.20215010125987e-17
2008213	12	5.03412397105076e-17	5.29107267931355e-17
2008213	13	5.02541713572266e-17	5.28291974069667e-17
2008213	14	4.98254775847126e-17	5.24568502203502e-17
2008213	15	4.91333930009519e-17	5.18352325445623e-17
2008213	16	4.85386984552359e-17	5.12443132828969e-17
2008213	17	4.81620870938898e-17	5.09446204574165e-17
2008213	18	4.88928064028492e-17	5.18231099590032e-17
2008213	19	5.00856769374141e-17	5.31865081611478e-17
2008213	20	5.05827560822536e-17	5.3899091671572e-17
2008213	21	5.04184462132404e-17	5.37683061713097e-17
2008213	22	5.04296964140272e-17	5.38596080460538e-17
2008213	23	5.04745676460543e-17	5.39051652339488e-17
2008214	0	4.95538544005176e-17	5.28007108699861e-17
2008214	1	4.78928622806207e-17	5.08331262946304e-17
2008214	2	4.673827071723e-17	4.9775404800013e-17
2008214	3	4.85760515482901e-17	5.19577694799512e-17
2008214	4	5.23725608785425e-17	5.62781154374563e-17
2008214	5	6.03899100217542e-17	6.67814253398334e-17
2008214	6	6.73679003767687e-17	7.44506050396225e-17
2008214	7	6.74986141180227e-17	7.3242230891618e-17
2008214	8	6.6316737278112e-17	7.08637636524574e-17
2008214	9	6.58188039366308e-17	6.97354700110137e-17
2008214	10	6.64226540185291e-17	7.06008464779941e-17
2008214	11	6.67191788476884e-17	7.11044410452102e-17
2008214	12	6.65696177939333e-17	7.09140767710111e-17
2008214	13	6.56768435407772e-17	7.02798108907294e-17
2008214	14	6.45050482971228e-17	6.92374254612564e-17
2008214	15	6.22845130221958e-17	6.74532166908502e-17
2008214	16	6.05553919761423e-17	6.69037495987211e-17
2008214	17	6.05651263652992e-17	6.97197723741961e-17
2008214	18	1.17652863111943e-16	1.78627613206702e-16
2008214	19	1.05377333903103e-16	1.75230912697065e-16
2008214	20	1.10561928112656e-16	1.75149515443727e-16
2008214	21	1.00788744279688e-16	1.52324399934328e-16
2008214	22	1.17624637951369e-16	1.68802416404956e-16
2008214	23	1.06404499161e-16	1.45971931293852e-16
2008215	0	1.14575037367985e-16	1.55521547932058e-16
2008215	1	1.2373173989018e-16	1.71323595185025e-16
2008215	2	1.23514603861858e-16	1.71365155809055e-16
2008215	3	1.22478275554996e-16	1.71116964427535e-16
2008215	4	1.19715547470967e-16	1.71033067500808e-16
2008215	5	1.19497598026218e-16	1.70818541818012e-16
2008215	6	1.19636796556835e-16	1.70473014145907e-16
2008215	7	1.19459318728135e-16	1.70233747433738e-16
2008215	8	1.19273158592151e-16	1.7036959454138e-16
2008215	9	1.19710462327376e-16	1.70499200052758e-16
2008215	10	1.2286020474792e-16	1.70007436318352e-16
2008215	11	1.2035229656456e-16	1.65224789846998e-16
2008215	12	1.23870237386662e-16	1.69430851336206e-16
2008215	13	1.24070906487431e-16	1.69704191136407e-16
2008215	14	1.24226373630549e-16	1.69837010265833e-16
2008215	15	1.26106301236373e-16	1.71777424919371e-16
2008215	16	1.24093900311009e-16	1.69753797361072e-16
2008215	17	1.23774907251829e-16	1.69761204222378e-16
2008215	18	1.12020001697119e-16	1.52450373634908e-16
2008215	19	1.25212007307963e-16	1.69445410187115e-16
2008215	20	1.24636922790249e-16	1.69966148373117e-16
2008215	21	1.26233924230312e-16	1.71539243337947e-16
2008215	22	1.24648985533991e-16	1.69934980821248e-16
2008215	23	9.98086572016867e-17	1.36436243464676e-16
2008216	0	1.09166453373638e-16	1.49593900022354e-16
2008216	1	1.09068670939229e-16	1.50461843460738e-16
2008216	2	8.75370156902383e-17	1.22295045803807e-16
2008216	3	9.7193748493809e-17	1.35335241809392e-16
2008216	4	1.21435556804193e-16	1.69338079210714e-16
2008216	5	1.23488790138312e-16	1.72381586136945e-16
2008216	6	1.21694813663779e-16	1.66530018091579e-16
2008216	7	1.18174267400984e-16	1.60934583110309e-16
2008216	8	1.11925175921752e-16	1.51885503832143e-16
2008216	9	9.9427147388459e-17	1.34212016856663e-16
2008216	10	1.03054910817788e-16	1.41170978891817e-16
2008216	11	9.33539008032383e-17	1.2944038615207e-16
2008216	12	1.14487922769257e-16	1.58787251846897e-16
2008216	13	1.22344629478853e-16	1.69676674589147e-16
2008216	14	1.25935325290425e-16	1.73775081671423e-16
2008216	15	1.22065027338248e-16	1.65726689305683e-16
2008216	16	1.2046030425726e-16	1.63393369929672e-16
2008216	17	1.19629306251165e-16	1.64520323832475e-16
2008216	18	1.21270226849266e-16	1.71070054819058e-16
2008216	19	1.17195613483402e-16	1.65373866151546e-16
2008216	20	1.21896078905115e-16	1.71106681230745e-16
2008216	21	1.23442740670946e-16	1.72033013158042e-16
2008216	22	1.27476674778417e-16	1.75828618900516e-16
2008216	23	1.2502683463723e-16	1.71123615619845e-16
2008217	0	1.24295686602713e-16	1.75702666621165e-16
2008217	1	1.20263260422468e-16	1.7012047215924e-16
2008217	2	1.19914396993037e-16	1.6837244834382e-16
2008217	3	1.22835826091443e-16	1.73291962931897e-16
2008217	4	1.23875978498571e-16	1.73625530253606e-16
2008217	5	1.24385463902485e-16	1.72477122562827e-16
2008217	6	1.22719511169729e-16	1.69662225839516e-16
2008217	7	1.03050951030959e-16	1.4315297070636e-16
2008217	8	8.34414138878555e-17	1.15596829918986e-16
2008217	9	1.07205732376468e-16	1.4820795049241e-16
2008217	10	1.263639698499e-16	1.73042171610632e-16
2008217	11	1.21397517666178e-16	1.62878864578703e-16
2008217	12	1.17032995312101e-16	1.55697407213863e-16
2008217	13	1.14755883336188e-16	1.50965450902491e-16
2008217	14	1.12552185079519e-16	1.46463344722728e-16
2008217	15	1.12966926092057e-16	1.50022125639139e-16
2008217	16	1.16565740662391e-16	1.64632914495653e-16
2008217	17	1.10542574470388e-16	1.56330218150088e-16
2008217	18	1.18436736041774e-16	1.66823783326123e-16
2008217	19	1.21737618948323e-16	1.72052463419835e-16
2008217	20	1.10118856978166e-16	1.54674402733183e-16
2008217	21	1.00092431599678e-16	1.41256429565823e-16
2008217	22	9.80978640118364e-17	1.37880774925663e-16
2008217	23	1.04692220882918e-16	1.45548353866139e-16
2008218	0	1.14441645369072e-16	1.58659950158605e-16
2008218	1	1.23668048556458e-16	1.71520768263739e-16
2008218	2	1.23695335129237e-16	1.71643400935261e-16
2008218	3	1.2421753370284e-16	1.71960187362362e-16
2008218	4	1.24429815689486e-16	1.7207238580948e-16
2008218	5	1.24266375461622e-16	1.71801787877246e-16
2008218	6	1.24146087350532e-16	1.72108366222837e-16
2008218	7	1.24045215939208e-16	1.73419435782665e-16
2008218	8	1.22158177845368e-16	1.70357699983392e-16
2008218	9	1.22094243683837e-16	1.70610187849308e-16
2008218	10	1.23747162944298e-16	1.74400364527315e-16
2008218	11	1.18971811912629e-16	1.68257213580384e-16
2008218	12	1.19897479139358e-16	1.70033156758104e-16
2008218	13	1.22850345609543e-16	1.74801948226918e-16
2008218	14	1.22872391891295e-16	1.75469199088959e-16
2008218	15	1.23021935573162e-16	1.7619159005074e-16
2008218	16	1.23177024805496e-16	1.76479751943758e-16
2008218	17	1.23375541094904e-16	1.76625255556283e-16
2008218	18	1.23629594038554e-16	1.76770294984299e-16
2008218	19	1.23721700262515e-16	1.76970574805894e-16
2008218	20	1.22910450667161e-16	1.76661008631495e-16
2008218	21	1.22413179022844e-16	1.77017855721499e-16
2008218	22	1.221062318391e-16	1.77735844239867e-16
2008218	23	1.20397633818858e-16	1.75846262354795e-16
2008219	0	1.1558547971561e-16	1.69427447362337e-16
2008219	1	1.12279378181368e-16	1.66426286730451e-16
2008219	2	1.18111295251615e-16	1.78168396308089e-16
2008219	3	1.18598559202357e-16	1.77849921301715e-16
2008219	4	1.18117580145223e-16	1.77670819897133e-16
2008219	5	1.10713094882873e-16	1.66712717997928e-16
2008219	6	1.0312023240342e-16	1.54939355480508e-16
2008219	7	9.71615190047049e-17	1.44349229221971e-16
2008219	8	8.99814042591656e-17	1.36158855585704e-16
2008219	9	8.49850660067964e-17	1.26137400816794e-16
2008219	10	7.88077970756716e-17	1.14590796315184e-16
2008219	11	7.29699193408272e-17	1.04895019516306e-16
2008219	12	6.99127303673426e-17	9.79179137493874e-17
2008219	13	6.82413375005252e-17	9.32974195956463e-17
2008219	14	6.59780801532033e-17	8.8455941088905e-17
2008219	15	6.05444454203278e-17	7.9860390333222e-17
2008219	16	5.65139392384194e-17	7.35084992327344e-17
2008219	17	5.53211946791729e-17	7.05152308827822e-17
2008219	18	5.5513108529986e-17	6.99290028572316e-17
2008219	19	5.46149677854128e-17	7.07367272159173e-17
2008219	20	5.39308934042851e-17	7.28858444270213e-17
2008219	21	5.623268021241e-17	7.67252455989996e-17
2008219	22	5.87997143029698e-17	8.31999913184136e-17
2008219	23	6.56839129221277e-17	9.88722068786624e-17
2008220	0	6.99405855170957e-17	1.07889955186222e-16
2008220	1	1.17149680122243e-16	1.85799909598142e-16
2008220	2	1.13266142794285e-16	1.85733467574787e-16
2008220	3	8.89598946553578e-17	1.35807355634304e-16
2008220	4	7.81966623805516e-17	1.1375884483253e-16
2008220	5	7.43088992166208e-17	1.02679512041111e-16
2008220	6	7.06920515799491e-17	9.44239832937993e-17
2008220	7	6.82009823870715e-17	8.81567272627857e-17
2008220	8	6.70209808057899e-17	8.33517194358583e-17
2008220	9	6.75591943360532e-17	7.99183192963031e-17
2008220	10	6.68649692838548e-17	7.77425293039251e-17
2008220	11	6.54061442076471e-17	7.6037916116022e-17
2008220	12	6.46401975995758e-17	7.45628900051426e-17
2008220	13	6.43396779787735e-17	7.34339737590107e-17
2008220	14	6.30925653534781e-17	7.23646806128034e-17
2008220	15	6.08779054186122e-17	7.32889970916766e-17
2008220	16	5.93643460866968e-17	8.00432330634424e-17
2008220	17	1.13258213311389e-16	1.84485138791538e-16
2008220	18	1.10607696372632e-16	1.84396786681464e-16
2008220	19	1.06471001090693e-16	1.73065838896739e-16
2008220	20	8.18125665977365e-17	1.3193787204899e-16
2008220	21	8.82399548658249e-17	1.41354227484306e-16
2008220	22	1.04051210373603e-16	1.62843351827507e-16
2008220	23	1.13302050137916e-16	1.72881780295521e-16
2008221	0	1.16750589396216e-16	1.78193964616137e-16
2008221	1	1.22344503550733e-16	1.85432507044355e-16
2008221	2	1.21978370445297e-16	1.84203348682076e-16
2008221	3	1.23219600044628e-16	1.81248701123044e-16
2008221	4	1.24458607432421e-16	1.77281096171021e-16
2008221	5	7.35433464912114e-17	9.20990350138388e-17
2008221	6	7.72737384648244e-17	9.60080252271093e-17
2008221	7	1.25514727160584e-16	1.75599534956798e-16
2008221	8	1.25077539290114e-16	1.75309061869938e-16
2008221	9	1.23833581797771e-16	1.74986115113377e-16
2008221	10	1.24423479401435e-16	1.7512117282735e-16
2008221	11	1.03716092458116e-16	1.48863286023292e-16
2008221	12	1.07087295716379e-16	1.54751867825174e-16
2008221	13	1.20105542288583e-16	1.71744416305687e-16
2008221	14	1.24712837094901e-16	1.77175706416426e-16
2008221	15	1.24482108685876e-16	1.75578867594689e-16
2008221	16	1.09536771968437e-16	1.46610555674068e-16
2008221	17	1.04863047026979e-16	1.38381869931569e-16
2008221	18	1.03412043605871e-16	1.38232839803166e-16
2008221	19	1.06071062611719e-16	1.41567133311993e-16
2008221	20	1.07258814621343e-16	1.44246871001098e-16
2008221	21	1.0503934073779e-16	1.39582949296376e-16
2008221	22	1.11237482468997e-16	1.47404467231501e-16
2008221	23	1.19256412918244e-16	1.58934618953445e-16
2008222	0	1.23813199825232e-16	1.67181311604531e-16
2008222	1	1.22804026271488e-16	1.65445866772361e-16
2008222	2	1.27071535092809e-16	1.73206626520185e-16
2008222	3	1.29103181413068e-16	1.75523614384818e-16
2008222	4	1.21583076111096e-16	1.62630126445242e-16
2008222	5	1.08210178795364e-16	1.42536190963811e-16
2008222	6	9.80446634005889e-17	1.27750102201988e-16
2008222	7	8.74499929131691e-17	1.12307608461901e-16
2008222	8	7.79861210855128e-17	9.9440155992714e-17
2008222	9	7.01733613938662e-17	8.94801622315405e-17
2008222	10	6.39497170272387e-17	8.16927504247419e-17
2008222	11	5.7166176555385e-17	7.28579377068768e-17
2008222	12	5.24910587189284e-17	6.65181991998237e-17
2008222	13	4.85469386039062e-17	6.11685553951421e-17
2008222	14	4.48326994735604e-17	5.55315409514551e-17
2008222	15	3.7598410781496e-17	4.61423507860354e-17
2008222	16	2.85856942953884e-17	3.59200183821059e-17
2008222	17	2.3026317589261e-17	2.97997486458529e-17
2008222	18	2.46901837034739e-17	3.22241941636569e-17
2008222	19	3.2448329032346e-17	4.35556132013859e-17
2008222	20	4.45261264038563e-17	5.91968832911598e-17
2008222	21	5.69141720908434e-17	7.07901264877644e-17
2008222	22	5.76935534971725e-17	6.93564922916818e-17
2008222	23	5.40878691410451e-17	6.43590025619238e-17
2008223	0	3.77509980964655e-17	4.23805090583566e-17
2008223	1	2.94775712466694e-17	3.15185638256535e-17
2008223	2	2.96038486181405e-17	3.17391196163282e-17
2008223	3	3.68690565226863e-17	4.10499334456173e-17
2008223	4	4.22727246581729e-17	4.78429052770047e-17
2008223	5	4.74662808262991e-17	5.39658972719181e-17
2008223	6	4.06245216554874e-17	4.672739938338e-17
2008223	7	2.852147143555e-17	3.0228652187084e-17
2008223	8	3.55828917734494e-17	4.02403686891778e-17
2008223	9	4.08950878475533e-17	4.88879921592594e-17
2008223	10	3.75837370300594e-17	4.18150657928281e-17
2008223	11	4.10905028860958e-17	4.90474697568109e-17
2008223	12	6.14218851856271e-17	8.04541852509637e-17
2008223	13	1.2113314962023e-16	1.69018591839385e-16
2008223	14	1.1901546755171e-16	1.64922676154611e-16
2008223	15	1.21449694150838e-16	1.69461791425238e-16
2008223	16	1.24018819761632e-16	1.69579152392148e-16
2008223	17	1.2417538800864e-16	1.68896908913833e-16
2008223	18	1.23112198238368e-16	1.68864377160738e-16
2008223	19	1.24011318999166e-16	1.69148663169704e-16
2008223	20	1.25303116546443e-16	1.70408535088936e-16
2008223	21	1.18683397636157e-16	1.59013002142049e-16
2008223	22	1.14949737398829e-16	1.60273785663566e-16
2008223	23	1.02906932298833e-16	1.43140045462783e-16
2008224	0	9.88054057077386e-17	1.37362067740286e-16
2008224	1	1.03046099478303e-16	1.43263092467916e-16
2008224	2	9.34099989625379e-17	1.27875957017053e-16
2008224	3	1.1457212672868e-16	1.58133040388394e-16
2008224	4	1.22993494842732e-16	1.69900164735541e-16
2008224	5	1.25901276517431e-16	1.68328403279431e-16
2008224	6	1.22451993508182e-16	1.59556114800745e-16
2008224	7	1.18087868587197e-16	1.51818921577914e-16
2008224	8	1.11049478745312e-16	1.4155211037968e-16
2008224	9	1.06976055387192e-16	1.36309480981521e-16
2008224	10	1.08799271781597e-16	1.4006017450644e-16
2008224	11	1.1579999381173e-16	1.53400244188466e-16
2008224	12	1.12105825538108e-16	1.53100858021162e-16
2008224	13	1.07790232725455e-16	1.48664290339093e-16
2008224	14	1.16542674846793e-16	1.61893355401812e-16
2008224	15	1.22442457512268e-16	1.69755983849551e-16
2008224	16	1.22458919209588e-16	1.6999185241984e-16
2008224	17	1.22282975953072e-16	1.69447577884101e-16
2008224	18	1.22051807304588e-16	1.69626528194127e-16
2008224	19	1.23716224119637e-16	1.7158661960001e-16
2008224	20	1.24175567323444e-16	1.72352027926201e-16
2008224	21	1.19367479259825e-16	1.63661660077218e-16
2008224	22	1.14511066987701e-16	1.56315527410321e-16
2008224	23	1.10460818945155e-16	1.5082713703292e-16
2008225	0	1.08296181237719e-16	1.49043324557106e-16
2008225	1	1.16552485454299e-16	1.72357367840865e-16
2008225	2	1.10031238419584e-16	1.72349875413168e-16
2008225	3	1.00823071783346e-16	1.6986869189385e-16
2008225	4	1.03588861903748e-16	1.79329141975285e-16
2008225	5	1.09703737888153e-16	1.81849571660373e-16
2008225	6	1.13440854496331e-16	1.8328248063418e-16
2008225	7	1.18281101464722e-16	1.84632159591611e-16
2008225	8	8.74949646324156e-17	1.27156943802082e-16
2008225	9	8.66817324367932e-17	1.25956756716836e-16
2008225	10	1.21801793995554e-16	1.82552867892735e-16
2008225	11	1.24119824866532e-16	1.83232693281711e-16
2008225	12	1.25547285845875e-16	1.84023179404285e-16
2008225	13	1.1638954853409e-16	1.72001620918063e-16
2008225	14	1.57334926685049e-17	2.38539501816712e-17
2008225	15	1.22050656280406e-19	1.7124455277419e-19
2008225	16	8.55761832530416e-17	1.22367575694722e-16
2008225	17	1.16776109607168e-16	1.6953717849061e-16
2008225	18	1.14248518294912e-16	1.69540505316864e-16
2008225	19	1.22728651826689e-16	1.69231606131203e-16
2008225	20	1.24416853057615e-16	1.69292644035999e-16
2008225	21	1.24419369717869e-16	1.69679349419123e-16
2008225	22	1.2510150707722e-16	1.69683866574581e-16
2008225	23	1.20692171324603e-16	1.63634784354867e-16
2008226	0	1.24822379532556e-16	1.69593463613176e-16
2008226	1	1.24250213153645e-16	1.69779517157222e-16
2008226	2	1.23310715582049e-16	1.69568925579621e-16
2008226	3	1.23284483537492e-16	1.69232712438824e-16
2008226	4	1.24737294546845e-16	1.69255471002579e-16
2008226	5	1.24842134002411e-16	1.69330565480624e-16
2008226	6	1.24326718042857e-16	1.69251303262175e-16
2008226	7	1.24146502736702e-16	1.69360469629824e-16
2008226	8	1.23381639774162e-16	1.6969232346726e-16
2008226	9	1.22726619566474e-16	1.69593368513594e-16
2008226	10	1.22475728630754e-16	1.69379603721714e-16
2008226	11	1.14610901572182e-16	1.59293752200606e-16
2008226	12	1.17437010818189e-16	1.62705896405048e-16
2008226	13	1.20064012317963e-16	1.69195526152396e-16
2008226	14	1.19766926245883e-16	1.68961009490968e-16
2008226	15	1.25397296382354e-16	1.74463356436478e-16
2008226	16	1.11613613214113e-16	1.55805634085042e-16
2008226	17	9.61092858743e-17	1.3184379484989e-16
2008226	18	1.13644903141243e-16	1.55325762890497e-16
2008226	19	1.26668778746532e-16	1.71758041232825e-16
2008226	20	1.20890947608335e-16	1.68603462719786e-16
2008226	21	1.04183797718608e-16	1.47471381440211e-16
2008226	22	8.46754725245856e-17	1.19061909884138e-16
2008226	23	1.22274807909384e-16	1.69730595981724e-16
2008227	0	1.2076729488929e-16	1.69719422459693e-16
2008227	1	1.19241830318298e-16	1.69315832694925e-16
2008227	2	1.17614273236578e-16	1.69422469939677e-16
2008227	3	1.07718890765839e-16	1.59369131601025e-16
2008227	4	9.61558742700076e-17	1.38045955950227e-16
2008227	5	8.47030036803472e-17	1.2034712385056e-16
2008227	6	9.79741035282866e-17	1.3730769639246e-16
2008227	7	1.16649560375225e-16	1.63326802793538e-16
2008227	8	1.22960190133206e-16	1.71861070816164e-16
2008227	9	1.22862852869189e-16	1.71930116551106e-16
2008227	10	1.22557475377801e-16	1.72315689397645e-16
2008227	11	1.22428671353544e-16	1.72578454807416e-16
2008227	12	1.2196320670806e-16	1.72448613219392e-16
2008227	13	1.12805524328585e-16	1.60260383715477e-16
2008227	14	1.01319068794131e-16	1.44947817677226e-16
2008227	15	9.03946148300037e-17	1.30447848082069e-16
2008227	16	7.82039434241874e-17	1.14273771838196e-16
2008227	17	7.38141306878476e-17	1.09967047338997e-16
2008227	18	6.93835690316056e-17	1.06314092990754e-16
2008227	19	7.39928893093545e-17	1.14784421436918e-16
2008227	20	8.59401359642435e-17	1.33114155667204e-16
2008227	21	9.75110772773252e-17	1.50274621406585e-16
2008227	22	9.44704453789437e-17	1.45736921833476e-16
2008227	23	8.95613461238923e-17	1.38767448967867e-16
2008228	0	8.77322553076681e-17	1.35895458954709e-16
2008228	1	8.78429714445577e-17	1.34347901843867e-16
2008228	2	8.96442336921623e-17	1.36502254938435e-16
2008228	3	9.33980499645631e-17	1.42738860650365e-16
2008228	4	9.11915832075403e-17	1.40658385149042e-16
2008228	5	8.4134829482571e-17	1.32414496733765e-16
2008228	6	8.7976740446133e-17	1.39825998802164e-16
2008228	7	9.56563150062435e-17	1.4996930640993e-16
2008228	8	9.67388715921693e-17	1.49189441035364e-16
2008228	9	1.01765844987257e-16	1.54534181444995e-16
2008228	10	1.08151819296259e-16	1.61572400409854e-16
2008228	11	1.11438685102401e-16	1.65842100064248e-16
2008228	12	1.1902919753991e-16	1.74413665269633e-16
2008228	13	1.20741712008393e-16	1.74376659408472e-16
2008228	14	1.21948740979391e-16	1.74576523476095e-16
2008228	15	1.21985525051061e-16	1.73120928044306e-16
2008228	16	1.11371689952469e-16	1.55274712005675e-16
2008228	17	1.02277908743066e-16	1.40119067925527e-16
2008228	18	9.37650746487073e-17	1.26488642836009e-16
2008228	19	8.61955430676733e-17	1.13982216538818e-16
2008228	20	7.93615363227376e-17	1.02843150598042e-16
2008228	21	7.35380323005704e-17	9.35093315139193e-17
2008228	22	6.82078619629766e-17	8.48796927473692e-17
2008228	23	6.7583921196631e-17	8.34945031981516e-17
2008229	0	1.27945459036638e-16	1.79225066717529e-16
2008229	1	1.27603320091363e-16	1.79906325766922e-16
2008229	2	1.27182783494858e-16	1.81054438353665e-16
2008229	3	1.25876678712665e-16	1.81529331494591e-16
2008229	4	1.06767638797026e-16	1.52499385965765e-16
2008229	5	8.90631600752019e-17	1.24143174778412e-16
2008229	6	8.00923287079844e-17	1.11336128223138e-16
2008229	7	7.72342771510372e-17	1.07845548999687e-16
2008229	8	1.21440589637279e-16	1.81487311753247e-16
2008229	9	1.21952298960333e-16	1.81156585142727e-16
2008229	10	1.23851851823742e-16	1.83915833582793e-16
2008229	11	1.2157706287312e-16	1.81238365374916e-16
2008229	12	1.18567668359491e-16	1.78392430751408e-16
2008229	13	1.1520205947343e-16	1.7492019096639e-16
2008229	14	1.10939369586839e-16	1.69326497293096e-16
2008229	15	1.06197586233485e-16	1.62564542654232e-16
2008229	16	1.00850947772976e-16	1.55326301361237e-16
2008229	17	9.43145383160061e-17	1.48024312813749e-16
2008229	18	8.91860938750839e-17	1.42549091747332e-16
2008229	19	8.59175178054358e-17	1.38629584124622e-16
2008229	20	8.34118259840704e-17	1.35091941679708e-16
2008229	21	8.11405375461387e-17	1.31088061495453e-16
2008229	22	7.95631525467241e-17	1.2836048994472e-16
2008229	23	8.00169844012957e-17	1.28011640024162e-16
2008230	0	8.02996646621133e-17	1.29016329954189e-16
2008230	1	1.05921917969225e-16	1.81133601610867e-16
2008230	2	1.06897548637106e-16	1.80937759257157e-16
2008230	3	1.10686627162005e-16	1.80786206609333e-16
2008230	4	1.13938281868314e-16	1.81283773209701e-16
2008230	5	1.14924942330621e-16	1.82103531821641e-16
2008230	6	1.14872171379585e-16	1.82574314249689e-16
2008230	7	1.15052096179963e-16	1.82637454551186e-16
2008230	8	1.18383479537101e-16	1.83198662770787e-16
2008230	9	1.22936037238323e-16	1.83585379851452e-16
2008230	10	1.28408910324435e-16	1.87233719919681e-16
2008230	11	1.25262536985009e-16	1.79687211337078e-16
2008230	12	1.21686855067175e-16	1.73219008102548e-16
2008230	13	1.18561705008002e-16	1.68997369207166e-16
2008230	14	1.15959706916818e-16	1.66411862349902e-16
2008230	15	1.14111994751236e-16	1.64065889705961e-16
2008230	16	1.12840251707617e-16	1.61016734963427e-16
2008230	17	1.11692543671474e-16	1.56044965266231e-16
2008230	18	1.08415630428671e-16	1.49361016769374e-16
2008230	19	1.02825105974005e-16	1.405939076734e-16
2008230	20	9.72212553567068e-17	1.29800431161942e-16
2008230	21	9.27226388728004e-17	1.20227777746042e-16
2008230	22	8.85640168434096e-17	1.11773380932824e-16
2008230	23	8.58225323644169e-17	1.0691613068228e-16
2008231	0	8.43400818890735e-17	1.05723839916235e-16
2008231	1	8.52758968031256e-17	1.088669626318e-16
2008231	2	8.98623212142702e-17	1.17839280073832e-16
2008231	3	9.03663638242723e-17	1.23401195753615e-16
2008231	4	8.95995071122977e-17	1.25815817347178e-16
2008231	5	8.57405522234081e-17	1.24655718515868e-16
2008231	6	8.63329636833518e-17	1.37669294933099e-16
2008231	7	1.04824473524474e-16	1.70792158096193e-16
2008231	8	9.17475647828913e-17	1.35935775949433e-16
2008231	9	1.04326855757858e-16	1.52099387977901e-16
2008231	10	1.19786646887623e-16	1.74244127736107e-16
2008231	11	1.23704150441018e-16	1.73960609849087e-16
2008231	12	1.22606385682486e-16	1.74094907857066e-16
2008231	13	1.18950448012047e-16	1.71363440123968e-16
2008231	14	1.18440905747262e-16	1.70664519718052e-16
2008231	15	1.19765288688188e-16	1.69574171495579e-16
2008231	16	1.2023223982085e-16	1.65643729883115e-16
2008231	17	9.26833815450041e-17	1.2551750150195e-16
2008231	18	7.39557862401078e-17	1.00337324570397e-16
2008231	19	6.28713783389789e-17	8.46506156160476e-17
2008231	20	5.46379005894336e-17	7.19443622058456e-17
2008231	21	4.77279716609633e-17	6.17640490914791e-17
2008231	22	4.69887479839742e-17	6.15947007947332e-17
2008231	23	1.09493880124293e-16	1.71593310236111e-16
2008232	0	1.09244597130579e-16	1.7244195714441e-16
2008232	1	1.11986167115956e-16	1.64482571949739e-16
2008232	2	1.17277551632299e-16	1.63201129608992e-16
2008232	3	1.21798726542823e-16	1.69826902464683e-16
2008232	4	1.21988857534234e-16	1.70412988055369e-16
2008232	5	1.16063024370772e-16	1.6211606446081e-16
2008232	6	1.1103551210325e-16	1.55067826580932e-16
2008232	7	1.13029010060449e-16	1.58389641617609e-16
2008232	8	1.20608797319072e-16	1.69104233693024e-16
2008232	9	1.19947314186915e-16	1.68634561820746e-16
2008232	10	1.2055452863879e-16	1.68163454555751e-16
2008232	11	9.67117587463482e-17	1.31309619221378e-16
2008232	12	1.12655748506544e-16	1.57073676982801e-16
2008232	13	1.17594784498296e-16	1.63621491035888e-16
2008232	14	1.20315604807127e-16	1.67799355280086e-16
2008232	15	1.20436537717398e-16	1.67977665475632e-16
2008232	16	1.20252639421761e-16	1.68115834217316e-16
2008232	17	1.213212054437e-16	1.70486508197401e-16
2008232	18	1.19725828406196e-16	1.62342415666203e-16
2008232	19	1.06168722048471e-16	1.40462323886916e-16
2008232	20	1.16912309157218e-16	1.68822604370644e-16
2008232	21	1.10806660876698e-16	1.61176459806259e-16
2008232	22	1.09697801946497e-16	1.54278304615029e-16
2008232	23	9.28916609899316e-17	1.37367159518864e-16
2008233	0	7.93302259026268e-17	1.15677592208255e-16
2008233	1	8.6132031099484e-17	1.22128296027297e-16
2008233	2	1.05238226794682e-16	1.47933010156668e-16
2008233	3	1.1690030159659e-16	1.60421742239735e-16
2008233	4	9.57713883298514e-17	1.31301592135199e-16
2008233	5	1.23745382138519e-16	1.704357707331e-16
2008233	6	1.09200378601581e-16	1.5118800077274e-16
2008233	7	1.02686349982106e-16	1.42254130716879e-16
2008233	8	1.15430244013191e-16	1.59303482634598e-16
2008233	9	1.18022537852439e-16	1.63088500608256e-16
2008233	10	1.23568913219411e-16	1.72004290965104e-16
2008233	11	1.22434712287111e-16	1.72673744825102e-16
2008233	12	1.22033621632505e-16	1.7282386374178e-16
2008233	13	1.21376001972032e-16	1.72959334097021e-16
2008233	14	1.15637443748784e-16	1.65096183418054e-16
2008233	15	1.14714896976686e-16	1.62120399640348e-16
2008233	16	1.1573976548561e-16	1.63167095286961e-16
2008233	17	1.1420269953477e-16	1.63179586889642e-16
2008233	18	1.10685115692608e-16	1.5907739327273e-16
2008233	19	1.06964921178653e-16	1.54201894078421e-16
2008233	20	1.11843205904434e-16	1.63142503045108e-16
2008233	21	1.17984525027711e-16	1.7617162035745e-16
2008233	22	1.17869360348015e-16	1.79133575564673e-16
2008233	23	1.16518380181642e-16	1.807369561739e-16
2008234	0	1.13008920839343e-16	1.8098788595331e-16
2008234	1	1.06829229213664e-16	1.7035598010526e-16
2008234	2	8.50272988753668e-17	1.29024765902416e-16
2008234	3	1.04508493640507e-16	1.56661123695154e-16
2008234	4	1.13346149085768e-16	1.6901032525863e-16
2008234	5	1.14547914386558e-16	1.69339573145699e-16
2008234	6	1.15949960509985e-16	1.69646780433921e-16
2008234	7	1.17281265679017e-16	1.6991507198212e-16
2008234	8	1.1786711036704e-16	1.696971452075e-16
2008234	9	1.18523458402382e-16	1.69868005434615e-16
2008234	10	1.1260547465924e-16	1.60927650096011e-16
2008234	11	1.08410204493805e-16	1.55677666221117e-16
2008234	12	1.11390138469188e-16	1.60345551812976e-16
2008234	13	1.10483490980063e-16	1.57128789284863e-16
2008234	14	1.17988426614851e-16	1.71340074099033e-16
2008234	15	1.17267654707218e-16	1.71300369142936e-16
2008234	16	1.16600464904212e-16	1.71947902421886e-16
2008234	17	1.10896518853803e-16	1.63786989182963e-16
2008234	18	9.55033317948978e-17	1.40885027543885e-16
2008234	19	1.00257932191776e-16	1.48161313488668e-16
2008234	20	9.94730059506616e-17	1.49797579697454e-16
2008234	21	8.83224419245316e-17	1.33117377956902e-16
2008234	22	9.76493680233103e-17	1.43377523753422e-16
2008234	23	1.1190791306232e-16	1.62415818627292e-16
2008235	0	1.15915609419421e-16	1.6777241832748e-16
2008235	1	1.21967894510393e-16	1.71525771890367e-16
2008235	2	1.23761412160898e-16	1.70881803156592e-16
2008235	3	1.18253699252766e-16	1.66181268013537e-16
2008235	4	1.19280450843122e-16	1.69746595922541e-16
2008235	5	1.17233951018058e-16	1.6679937942745e-16
2008235	6	1.14098175011576e-16	1.61274835917044e-16
2008235	7	1.14093579339554e-16	1.61568471138339e-16
2008235	8	1.02857034610992e-16	1.53399388955802e-16
2008235	9	7.81122493230925e-17	1.16568756846073e-16
2008235	10	5.38514783036765e-17	7.98009193437486e-17
2008235	11	2.81800712613661e-17	4.25931332511811e-17
2008235	12	5.10962668722295e-17	7.91311884773444e-17
2008235	13	9.48534444749583e-17	1.48035853233975e-16
2008235	14	9.96673803906446e-17	1.47891644735768e-16
2008235	15	1.01872272105636e-16	1.45478842719001e-16
2008235	16	1.02571489366324e-16	1.42483719840426e-16
2008235	17	1.01887334194105e-16	1.39969622438097e-16
2008235	18	9.94971701479832e-17	1.37036511052059e-16
2008235	19	9.86184114210053e-17	1.34569161990465e-16
2008235	20	1.0098515839063e-16	1.34336118408059e-16
2008235	21	1.02171184857386e-16	1.35022376017538e-16
2008235	22	1.02360222968646e-16	1.35324392780857e-16
2008235	23	1.0338180001779e-16	1.37245026326458e-16
2008236	0	1.10845230620125e-16	1.52782184488081e-16
2008236	1	1.2047729654629e-16	1.74461848871483e-16
2008236	2	1.19128689465511e-16	1.74438329616631e-16
2008236	3	1.19548092679723e-16	1.73307023562989e-16
2008236	4	1.13139225475668e-16	1.62650222294289e-16
2008236	5	1.1005138218866e-16	1.59185642432713e-16
2008236	6	1.07911346833776e-16	1.57106072121165e-16
2008236	7	1.0664136862735e-16	1.55860107866252e-16
2008236	8	1.04652460929708e-16	1.54168050248708e-16
2008236	9	1.02406198623436e-16	1.52579627874099e-16
2008236	10	1.00347809173655e-16	1.50861902712119e-16
2008236	11	9.93923479739883e-17	1.49706462706066e-16
2008236	12	9.8698441594932e-17	1.48867487589141e-16
2008236	13	9.77059189935947e-17	1.4709949319753e-16
2008236	14	9.67791597904801e-17	1.45311758256925e-16
2008236	15	9.5713881662198e-17	1.43780221743443e-16
2008236	16	9.41620677252345e-17	1.41347994747434e-16
2008236	17	9.25849112333602e-17	1.387779107035e-16
2008236	18	9.14023376263201e-17	1.36732481185842e-16
2008236	19	9.00809430701905e-17	1.34080652272519e-16
2008236	20	8.89368125870721e-17	1.3165874391054e-16
2008236	21	8.7814793364407e-17	1.29590911880683e-16
2008236	22	8.68488582008878e-17	1.27913780387429e-16
2008236	23	8.76217405202407e-17	1.28764981932924e-16
2008237	0	9.07516550410589e-17	1.34034494411988e-16
2008237	1	9.51255348918847e-17	1.42651754675184e-16
2008237	2	9.90113512308422e-17	1.51806902202654e-16
2008237	3	1.00736829830993e-16	1.56278225065402e-16
2008237	4	1.13261400227286e-16	1.76640673098414e-16
2008237	5	1.13438342516347e-16	1.75254980078968e-16
2008237	6	1.13039775135638e-16	1.75196837114457e-16
2008237	7	1.11258729472251e-16	1.74973973444999e-16
2008237	8	1.09237406235408e-16	1.75058865910331e-16
2008237	9	1.07676210064932e-16	1.75183615400917e-16
2008237	10	1.08938203625494e-16	1.75649970052387e-16
2008237	11	1.14505933994591e-16	1.77388600126533e-16
2008237	12	1.18223274021186e-16	1.8018950374193e-16
2008237	13	1.26342005392778e-16	1.84045760224232e-16
2008237	14	1.05985651799897e-16	1.53781088477136e-16
2008237	15	1.00884855840499e-16	1.39492515355351e-16
2008237	16	9.62974704741953e-17	1.31885802001704e-16
2008237	17	8.70598155106789e-17	1.1837668778371e-16
2008237	18	7.62205350364282e-17	1.05382704286081e-16
2008237	19	6.95107890526579e-17	9.16141222944037e-17
2008237	20	6.52821767980036e-17	8.48310106168799e-17
2008237	21	6.37141676677748e-17	8.2293192620964e-17
2008237	22	6.30432814263759e-17	8.13580370027521e-17
2008237	23	5.96520553847054e-17	7.75140199755989e-17
2008238	0	5.37061460184067e-17	7.18446104014267e-17
2008238	1	4.68002287540414e-17	6.38049110802206e-17
2008238	2	4.29421474463474e-17	5.80778484573982e-17
2008238	3	3.90573341340341e-17	5.49050009719947e-17
2008238	4	3.85497876337428e-17	5.32387351123681e-17
2008238	5	3.81395685362312e-17	5.14926053096535e-17
2008238	6	3.77772720532773e-17	4.94595607058493e-17
2008238	7	3.73576626365519e-17	4.76098984207323e-17
2008238	8	3.5981861099875e-17	4.60321117875944e-17
2008238	9	3.77639433783151e-17	4.78648300922945e-17
2008238	10	4.39420268021926e-17	5.92149713192107e-17
2008238	11	7.14425350956522e-17	1.03965226634612e-16
2008238	12	1.16518088978011e-16	1.74214074888118e-16
2008238	13	1.08990257334987e-16	1.60428921491108e-16
2008238	14	1.17707813106632e-16	1.72499476172168e-16
2008238	15	1.18941095817706e-16	1.73952707930515e-16
2008238	16	1.22221106640831e-16	1.75488386301141e-16
2008238	17	1.14519539719074e-16	1.49372931811177e-16
2008238	18	9.71680639207425e-17	1.22033888286841e-16
2008238	19	8.23222188744195e-17	1.02141534576355e-16
2008238	20	7.31582176119801e-17	9.03564008388747e-17
2008238	21	7.26187923832674e-17	9.04178692361485e-17
2008238	22	9.43195247194243e-17	1.22699715315153e-16
2008238	23	1.2325945105471e-16	1.69479782353883e-16
2008239	0	1.23613399722489e-16	1.69108432129528e-16
2008239	1	1.23138985579226e-16	1.6931314382765e-16
2008239	2	1.23576715416334e-16	1.69562894607765e-16
2008239	3	8.89675983818058e-17	1.18425239527885e-16
2008239	4	5.83477809995954e-17	7.84808653258837e-17
2008239	5	1.0365179918479e-16	1.42779307289093e-16
2008239	6	1.03968398699548e-16	1.43193390525163e-16
2008239	7	1.12755469561829e-16	1.55953070873162e-16
2008239	8	1.22808265651579e-16	1.7041172625645e-16
2008239	9	1.22864932939704e-16	1.70381626953418e-16
2008239	10	1.24048434678893e-16	1.70436927322161e-16
2008239	11	1.24778639370854e-16	1.70532404268024e-16
2008239	12	1.24415296513536e-16	1.70956675797243e-16
2008239	13	1.24106668542788e-16	1.71163368518105e-16
2008239	14	1.23801961063492e-16	1.71484158695548e-16
2008239	15	1.23276885665148e-16	1.71435715234669e-16
2008239	16	1.2342191215361e-16	1.71640531314238e-16
2008239	17	1.23682749951717e-16	1.71927401655499e-16
2008239	18	1.23589507359103e-16	1.72064262832667e-16
2008239	19	1.23276398379786e-16	1.72638310420864e-16
2008239	20	1.2307961812751e-16	1.73098180535734e-16
2008239	21	1.22882192091858e-16	1.73091981664362e-16
2008239	22	1.22920130510302e-16	1.72239876759945e-16
2008239	23	1.06402042202424e-16	1.44592698672443e-16
2008240	0	6.77412921385707e-17	8.95274045883493e-17
2008240	1	5.96543277135859e-17	7.50688809394708e-17
2008240	2	5.48449193651338e-17	6.63559500210278e-17
2008240	3	5.62073426096583e-17	6.92579113044082e-17
2008240	4	6.00144111120032e-17	7.65716645711571e-17
2008240	5	5.41476451521492e-17	6.42793770925286e-17
2008240	6	4.78205413413601e-17	5.4305119635433e-17
2008240	7	4.51516790806232e-17	5.10035784175313e-17
2008240	8	4.36958912760771e-17	5.06135970826362e-17
2008240	9	4.49600231195162e-17	5.16184866675109e-17
2008240	10	4.69866340676074e-17	5.3496265651136e-17
2008240	11	4.8797573456627e-17	5.47214150959355e-17
2008240	12	4.86654050331684e-17	5.46242002178916e-17
2008240	13	4.81660000843748e-17	5.38213561485199e-17
2008240	14	4.6760105021084e-17	5.26626190523282e-17
2008240	15	4.52232966802379e-17	5.08788399427209e-17
2008240	16	4.20179480388072e-17	4.72161688451989e-17
2008240	17	3.79569648488847e-17	4.25408219911686e-17
2008240	18	3.34199236458158e-17	3.72543633646259e-17
2008240	19	2.83238167360567e-17	3.15369416420418e-17
2008240	20	2.43236690903521e-17	2.75176342227617e-17
2008240	21	1.18325585343114e-16	1.63176610459482e-16
2008240	22	1.24341955645789e-16	1.71656628003448e-16
2008240	23	1.24421434670162e-16	1.71511831307396e-16
2008241	0	1.24652991245387e-16	1.71343463276107e-16
2008241	1	1.24509183201446e-16	1.70967178291353e-16
2008241	2	1.23766400355236e-16	1.7115275481758e-16
2008241	3	1.2355218472186e-16	1.71343271834947e-16
2008241	4	1.13755476602114e-16	1.59136054994624e-16
2008241	5	1.12231636657371e-16	1.57310243128295e-16
2008241	6	1.22505825391634e-16	1.71797533692255e-16
2008241	7	1.22539503890539e-16	1.71582317787079e-16
2008241	8	1.22667837768679e-16	1.72294626562093e-16
2008241	9	1.21265661833666e-16	1.72530907312629e-16
2008241	10	1.19520138409641e-16	1.72748205056946e-16
2008241	11	1.81161440631829e-17	2.49899225229488e-17
2008241	12	5.95414094551216e-18	7.98600808335608e-18
2008241	13	2.43524638984001e-18	3.09048319039603e-18
2008241	14	1.65775984266604e-18	2.05539731329025e-18
2008241	15	1.65828538953594e-18	2.01251723399905e-18
2008241	16	2.44262045987201e-18	2.89074318973612e-18
2008241	17	4.41927520485945e-18	5.24111546965898e-18
2008241	18	7.74075350990537e-18	9.04332619488381e-18
2008241	19	1.35699358976561e-17	1.59104207397732e-17
2008241	20	2.16672517906385e-17	2.52920254122405e-17
2008241	21	2.99412003460564e-17	3.44588012382091e-17
2008241	22	3.64176607514425e-17	4.19252976258078e-17
2008241	23	4.26194184116505e-17	5.00326617745454e-17
2008242	0	4.70797668678338e-17	5.56878663185293e-17
2008242	1	4.97254915459797e-17	5.86523238735318e-17
2008242	2	5.1682880822665e-17	6.08276282030008e-17
2008242	3	5.33215245969008e-17	6.26403072320067e-17
2008242	4	5.46502358023223e-17	6.42922446369157e-17
2008242	5	5.53994916584265e-17	6.532972160359e-17
2008242	6	5.53259798429129e-17	6.52580983254969e-17
2008242	7	5.45170300003314e-17	6.43589248304696e-17
2008242	8	5.34742400947097e-17	6.31363104385856e-17
2008242	9	5.27209929540663e-17	6.23230262947708e-17
2008242	10	5.23044882352972e-17	6.20107046249057e-17
2008242	11	5.21750439935082e-17	6.21423305537093e-17
2008242	12	5.25378386870133e-17	6.29098623165594e-17
2008242	13	5.30784866988814e-17	6.37840240994168e-17
2008242	14	5.32527778980633e-17	6.40236304282745e-17
2008242	15	5.2929595036413e-17	6.37295258958775e-17
2008242	16	5.2252489111175e-17	6.31132635678396e-17
2008242	17	5.11990553979958e-17	6.18354422070249e-17
2008242	18	4.97403035679218e-17	5.98041706259637e-17
2008242	19	4.78671814737561e-17	5.71254371846363e-17
2008242	20	4.56903964255167e-17	5.43161867946912e-17
2008242	21	4.33528999546858e-17	5.14425211432771e-17
2008242	22	4.10866133732236e-17	4.86098377552937e-17
2008242	23	3.96154700448798e-17	4.6859458742295e-17
2008243	0	3.92731297204473e-17	4.64162523993111e-17
2008243	1	3.99991117067046e-17	4.71387110748201e-17
2008243	2	4.10665470479125e-17	4.83299104603117e-17
2008243	3	4.21815338612252e-17	4.95473776859244e-17
2008243	4	4.24718279484855e-17	4.98944394913819e-17
2008243	5	4.17856194546159e-17	4.90032570349057e-17
2008243	6	4.11874559497524e-17	4.83063219108328e-17
2008243	7	4.12532259551695e-17	4.85622276959663e-17
2008243	8	4.20240673778573e-17	4.97539042621452e-17
2008243	9	4.31414926665387e-17	5.14614286669448e-17
2008243	10	4.41256888193808e-17	5.30543700233076e-17
2008243	11	4.47592467583751e-17	5.41452535175515e-17
2008243	12	4.46044609426548e-17	5.42072793486509e-17
2008243	13	4.51414922901588e-17	5.51006019330503e-17
2008243	14	4.58506160004591e-17	5.61364269952961e-17
2008243	15	4.58003636184355e-17	5.63344748007015e-17
2008243	16	4.49070460470607e-17	5.55059224441423e-17
2008243	17	4.33593800807244e-17	5.3736327166691e-17
2008243	18	4.15426579555276e-17	5.18311124413328e-17
2008243	19	4.02461581038187e-17	5.06949501181174e-17
2008243	20	3.89353697046025e-17	5.00902586259272e-17
2008243	21	3.89292966930945e-17	5.08163564146661e-17
2008243	22	4.28691125862303e-17	5.60967567276744e-17
2008243	23	4.87630902626094e-17	6.39757590848218e-17
