# Supplementary material for: A comparison of sea salt emission parameterizations in northwestern Europe using a chemistry transport model setup
Source: Copernicus journal article supplement (doi:10.5194/acp-16-9905-2016), 2016-08-08
Supplement: Supplementary file 2 [file acp-16-9905-2016-supplement.zip › conc/conc.timeseries.values.sum2008.zero.Na.DE0002R.csv]

doy	hour	pm2.5	pm10
2008183	0	8.54862202561458e-17	9.7296667978587e-17
2008183	1	8.49772184809966e-17	9.62119931115954e-17
2008183	2	8.42190528985639e-17	9.51876470988129e-17
2008183	3	8.39287098103692e-17	9.47067674432225e-17
2008183	4	8.35616530130013e-17	9.43702601765635e-17
2008183	5	8.00022630155944e-17	9.32372605807087e-17
2008183	6	8.62404589296635e-17	1.02693931420706e-16
2008183	7	9.00699900224303e-17	1.06680335239995e-16
2008183	8	8.7958608024409e-17	1.04714814486328e-16
2008183	9	8.54118172702628e-17	1.00464629363181e-16
2008183	10	8.16576846495741e-17	9.7465747869834e-17
2008183	11	7.76278385505808e-17	9.26183161861348e-17
2008183	12	7.17961433766675e-17	8.62439246179906e-17
2008183	13	6.71781173300254e-17	8.04246835267672e-17
2008183	14	6.29349687271391e-17	7.52858205041149e-17
2008183	15	5.89858609583135e-17	7.07540288936443e-17
2008183	16	1.28162377176126e-16	1.84417990900236e-16
2008183	17	8.86710268194379e-17	1.20126334831577e-16
2008183	18	7.10146689714698e-17	9.33282985759706e-17
2008183	19	6.80970572191936e-17	8.65974466937158e-17
2008183	20	6.81494876448149e-17	8.32118554525577e-17
2008183	21	6.75884802547334e-17	8.09921095222291e-17
2008183	22	6.748831676959e-17	8.13978908644556e-17
2008183	23	6.77280567065247e-17	8.22858413288748e-17
2008184	0	6.649187927641e-17	8.19969347099416e-17
2008184	1	6.437859832641e-17	8.14956872480455e-17
2008184	2	6.38653222916403e-17	8.20185337389161e-17
2008184	3	6.36445357632792e-17	8.32579315251479e-17
2008184	4	6.47997873800504e-17	8.46971074837903e-17
2008184	5	6.82776700624058e-17	8.61631537604817e-17
2008184	6	7.03484722720655e-17	8.48787876454655e-17
2008184	7	7.04165969667523e-17	8.23338338695248e-17
2008184	8	6.88379454556272e-17	7.91606427694311e-17
2008184	9	6.68230190107532e-17	7.74384820027986e-17
2008184	10	6.18930816924335e-17	7.17182521584427e-17
2008184	11	5.65278182778376e-17	6.49454804353451e-17
2008184	12	5.25941852238829e-17	5.98567165127424e-17
2008184	13	4.94343201267723e-17	5.59987640494082e-17
2008184	14	4.74450318714955e-17	5.33433841825557e-17
2008184	15	4.60911106864141e-17	5.16607695608232e-17
2008184	16	4.51402704720119e-17	5.05047111661742e-17
2008184	17	4.4234102491681e-17	4.95221034293491e-17
2008184	18	4.33440168295176e-17	4.83375374265473e-17
2008184	19	4.18388637345322e-17	4.66243023195164e-17
2008184	20	4.0458043315976e-17	4.47339933621392e-17
2008184	21	3.97928016109414e-17	4.32546271369214e-17
2008184	22	3.89798061459558e-17	4.27583168899272e-17
2008184	23	3.97454295830033e-17	4.31249785374223e-17
2008185	0	4.08882709540615e-17	4.41073287318767e-17
2008185	1	4.19207148011903e-17	4.54835504101082e-17
2008185	2	4.32295490911219e-17	4.70952639240346e-17
2008185	3	4.46657498112697e-17	4.89606846990151e-17
2008185	4	4.64962139410267e-17	5.11247813926709e-17
2008185	5	4.80871254024555e-17	5.30247458309632e-17
2008185	6	4.93083419953064e-17	5.44969306399615e-17
2008185	7	5.1611000469384e-17	5.72771183652149e-17
2008185	8	5.43177079387775e-17	6.05171390124421e-17
2008185	9	5.65736697743254e-17	6.3235540629977e-17
2008185	10	6.21568349585503e-17	7.06678167330227e-17
2008185	11	6.56677248794136e-17	7.57410761377143e-17
2008185	12	8.82032599335565e-17	1.11225637189639e-16
2008185	13	1.30210940079223e-16	1.80779775562698e-16
2008185	14	1.30439186388176e-16	1.84458389924178e-16
2008185	15	1.2553166556266e-16	1.77358503094256e-16
2008185	16	1.19344186864956e-16	1.66050026731155e-16
2008185	17	1.05364041731894e-16	1.42036680803677e-16
2008185	18	1.01451407708084e-16	1.32206891062967e-16
2008185	19	9.99173111436251e-17	1.29532625945242e-16
2008185	20	1.10695552801654e-16	1.56708224653016e-16
2008185	21	1.12306241267124e-16	1.45295753750062e-16
2008185	22	1.06184635306205e-16	1.3240693985177e-16
2008185	23	9.89231073025423e-17	1.26192748766249e-16
2008186	0	9.21042891271915e-17	1.19247178497161e-16
2008186	1	7.80751950281082e-17	9.92764681491954e-17
2008186	2	7.29744609793267e-17	9.09023305144776e-17
2008186	3	6.67863062227763e-17	8.07197371827812e-17
2008186	4	6.33170546465753e-17	7.49472532665375e-17
2008186	5	5.93806206762399e-17	6.87681074886724e-17
2008186	6	5.31022227214442e-17	5.92468970503002e-17
2008186	7	4.74181726692927e-17	5.16040106998542e-17
2008186	8	4.28572557407492e-17	4.60532799726138e-17
2008186	9	3.87998282114789e-17	4.18783145036325e-17
2008186	10	3.55981657655256e-17	3.86361692943177e-17
2008186	11	3.36997996350509e-17	3.64714664296717e-17
2008186	12	3.29965254789198e-17	3.62957032924517e-17
2008186	13	3.23996000117392e-17	3.61606986853486e-17
2008186	14	3.1762771138432e-17	3.59148735726882e-17
2008186	15	3.22488413159849e-17	3.63630993404971e-17
2008186	16	3.28983379030095e-17	3.68097857742112e-17
2008186	17	3.47059049458813e-17	3.91804512449867e-17
2008186	18	3.6894532755685e-17	4.2756656438982e-17
2008186	19	4.11540485281653e-17	4.89462049857414e-17
2008186	20	4.72294010973178e-17	5.65626848113322e-17
2008186	21	5.67456226274349e-17	6.82962015965529e-17
2008186	22	7.50407482732771e-17	9.24535364390165e-17
2008186	23	1.20393938248969e-16	1.70915835652679e-16
2008187	0	1.22960678952691e-16	1.7845572424081e-16
2008187	1	1.14850740538476e-16	1.5024097941977e-16
2008187	2	1.13839060570581e-16	1.48725620785461e-16
2008187	3	1.13310342666163e-16	1.47636708968008e-16
2008187	4	1.12902788620483e-16	1.47209324916531e-16
2008187	5	1.13108192423285e-16	1.50805199509477e-16
2008187	6	1.13830124670015e-16	1.50795052348153e-16
2008187	7	1.25369223743577e-16	1.81132331161217e-16
2008187	8	1.26416255368785e-16	1.78017879082196e-16
2008187	9	1.2523198712902e-16	1.71884130583036e-16
2008187	10	1.2459097874897e-16	1.69562506933638e-16
2008187	11	1.21209374682276e-16	1.63066869699257e-16
2008187	12	1.17478081076942e-16	1.56870313901926e-16
2008187	13	1.14385656412184e-16	1.52561759032683e-16
2008187	14	1.11963041400207e-16	1.49880330430599e-16
2008187	15	1.1086006097766e-16	1.51234410754852e-16
2008187	16	1.0748050154879e-16	1.49217408267865e-16
2008187	17	1.0315184588558e-16	1.44746674886924e-16
2008187	18	9.70986117754482e-17	1.37318951340067e-16
2008187	19	9.07918308610171e-17	1.29071173400316e-16
2008187	20	8.49393585283528e-17	1.20184405495492e-16
2008187	21	7.99810979088307e-17	1.12285406522411e-16
2008187	22	7.60546087689501e-17	1.08802268257651e-16
2008187	23	7.43562337221848e-17	1.08674940071866e-16
2008188	0	7.58077023846742e-17	1.11786172244186e-16
2008188	1	7.78131172626582e-17	1.15728678745272e-16
2008188	2	8.10174607802264e-17	1.20096488832687e-16
2008188	3	8.35519934006556e-17	1.21578659629944e-16
2008188	4	8.34105648674967e-17	1.18745459056493e-16
2008188	5	8.30775664174648e-17	1.2632673246605e-16
2008188	6	7.76723708493979e-17	1.17305557260285e-16
2008188	7	7.31866818299572e-17	1.07654033447838e-16
2008188	8	7.21240071738317e-17	1.02457609257557e-16
2008188	9	7.91605338998262e-17	1.11845963271073e-16
2008188	10	9.73545090306231e-17	1.50041357799272e-16
2008188	11	8.69976663420759e-17	1.33334376887547e-16
2008188	12	1.13666948426068e-16	1.68596397470198e-16
2008188	13	1.18040532351078e-16	1.72241410343041e-16
2008188	14	1.15030813709988e-16	1.59950568785185e-16
2008188	15	1.12237631441027e-16	1.54327423634553e-16
2008188	16	1.12148403509707e-16	1.57113032148209e-16
2008188	17	1.10766441678985e-16	1.57045665405814e-16
2008188	18	1.11041380656005e-16	1.60211965869972e-16
2008188	19	1.17490131610203e-16	1.80072642432208e-16
2008188	20	1.14119287169037e-16	1.56160352710928e-16
2008188	21	1.13549508684014e-16	1.46510728346675e-16
2008188	22	1.12656555919798e-16	1.39673624254799e-16
2008188	23	1.10570910530027e-16	1.31169604529876e-16
2008189	0	1.07637668497367e-16	1.22689728257819e-16
2008189	1	1.03789905087176e-16	1.15766814897918e-16
2008189	2	1.00098332336729e-16	1.10622389352423e-16
2008189	3	9.643890287816e-17	1.06357733056921e-16
2008189	4	9.24818746001091e-17	1.02715298295195e-16
2008189	5	9.05330909182861e-17	9.93752909502853e-17
2008189	6	9.13290171942079e-17	9.87492230892058e-17
2008189	7	9.9534686638975e-17	1.13516182499707e-16
2008189	8	1.30557122497004e-16	1.75959043867693e-16
2008189	9	1.24172214810803e-16	1.66538044323059e-16
2008189	10	1.24573033900063e-16	1.54786632935758e-16
2008189	11	1.17669566797291e-16	1.38662433388299e-16
2008189	12	1.12857400540232e-16	1.29563438489994e-16
2008189	13	1.09905226515748e-16	1.24546166941977e-16
2008189	14	1.08608560567343e-16	1.22140672961959e-16
2008189	15	1.07686537557121e-16	1.19582543595329e-16
2008189	16	1.06918005755189e-16	1.17133851173219e-16
2008189	17	1.07055250068478e-16	1.17367704431746e-16
2008189	18	1.11674308289956e-16	1.27787905985725e-16
2008189	19	1.17346313543662e-16	1.37848371706027e-16
2008189	20	1.19173259520597e-16	1.40300221824103e-16
2008189	21	1.20895092629252e-16	1.46473125345278e-16
2008189	22	1.20047107859822e-16	1.54355808533125e-16
2008189	23	1.14566296849437e-16	1.71222676088711e-16
2008190	0	1.11142154161249e-16	1.68433928965597e-16
2008190	1	1.10645816977438e-16	1.67854415092353e-16
2008190	2	1.10963651698979e-16	1.67888908397956e-16
2008190	3	1.11568070171019e-16	1.67737002576642e-16
2008190	4	1.11589080170788e-16	1.67464639140934e-16
2008190	5	1.11334069327118e-16	1.59752005182901e-16
2008190	6	1.14767661401599e-16	1.58386166812665e-16
2008190	7	1.17303388606833e-16	1.59464335909883e-16
2008190	8	1.19204531919554e-16	1.59705484275372e-16
2008190	9	1.14048386256997e-16	1.48917686941326e-16
2008190	10	9.86290125327957e-17	1.25272684344371e-16
2008190	11	9.79161484470588e-17	1.25670665529261e-16
2008190	12	1.08656769301755e-16	1.42059028456264e-16
2008190	13	1.11381521213801e-16	1.46316297827524e-16
2008190	14	1.02926427175337e-16	1.30629051462864e-16
2008190	15	9.9326593373988e-17	1.21274925936967e-16
2008190	16	1.00944907793636e-16	1.24600328033659e-16
2008190	17	1.00779505311625e-16	1.24875343254821e-16
2008190	18	9.91457278380024e-17	1.2102881312682e-16
2008190	19	9.36044326297525e-17	1.10962419503392e-16
2008190	20	9.19278400340835e-17	1.05839873980896e-16
2008190	21	9.46362169163975e-17	1.100139290147e-16
2008190	22	1.0038269479091e-16	1.17792381015577e-16
2008190	23	1.05258280657835e-16	1.2576707515713e-16
2008191	0	1.07709640440695e-16	1.3011182157079e-16
2008191	1	1.06914465271305e-16	1.2727806380145e-16
2008191	2	1.09519483076163e-16	1.28950794711365e-16
2008191	3	1.11866618426708e-16	1.37369243528586e-16
2008191	4	1.23039497776037e-16	1.73928295937657e-16
2008191	5	1.25680672595802e-16	1.74958588377025e-16
2008191	6	1.213113833967e-16	1.65920866034809e-16
2008191	7	1.21692473161096e-16	1.69715918305418e-16
2008191	8	1.01356712758169e-16	1.28980156917311e-16
2008191	9	1.0159345353742e-16	1.23049968800633e-16
2008191	10	1.00345813224519e-16	1.18110353836432e-16
2008191	11	9.47483074602698e-17	1.11178997113304e-16
2008191	12	9.02077506251007e-17	1.06951490554275e-16
2008191	13	8.59624567414138e-17	1.0378070337643e-16
2008191	14	8.25188656370944e-17	9.99788010557646e-17
2008191	15	8.06043038886784e-17	9.63248871431919e-17
2008191	16	8.19411407039436e-17	9.87168522908699e-17
2008191	17	8.88870710672679e-17	1.09657293591328e-16
2008191	18	9.05153504934223e-17	1.09953315560422e-16
2008191	19	9.72856741974522e-17	1.22311598304971e-16
2008191	20	1.20003586565072e-16	1.74011249533057e-16
2008191	21	1.12998311406592e-16	1.50713106562975e-16
2008191	22	9.64875718554311e-17	1.22246783790582e-16
2008191	23	6.72017282325689e-17	8.666587001623e-17
2008192	0	4.41107245247209e-17	6.01337249144175e-17
2008192	1	3.40827424053585e-17	4.67209334599278e-17
2008192	2	3.13437396410935e-17	4.16500478130974e-17
2008192	3	3.06465070021445e-17	3.97007867739263e-17
2008192	4	2.72636333723062e-17	3.7711914668522e-17
2008192	5	2.63960577810363e-17	3.59705628884179e-17
2008192	6	2.67313183691277e-17	3.30302609233946e-17
2008192	7	2.62992350523471e-17	3.24363040681747e-17
2008192	8	3.89524325556132e-17	4.2551428806812e-17
2008192	9	5.50759598788523e-17	5.71946359595345e-17
2008192	10	1.29827485306724e-16	1.7392831866709e-16
2008192	11	1.30330031052507e-16	1.74942275346807e-16
2008192	12	1.27141152822757e-16	1.64044034680368e-16
2008192	13	1.30114976170486e-16	1.75003340148696e-16
2008192	14	1.2695293647369e-16	1.73987982083065e-16
2008192	15	1.26007992432037e-16	1.73615489209279e-16
2008192	16	8.41306646832785e-17	1.07506270517791e-16
2008192	17	5.58675938861683e-17	6.83433303794713e-17
2008192	18	3.74116591739922e-17	4.13202805016923e-17
2008192	19	4.06072613720139e-17	4.58047483293218e-17
2008192	20	4.67434870657525e-17	5.67887055123633e-17
2008192	21	1.02529876486108e-16	1.61589360912775e-16
2008192	22	5.83738565577689e-17	8.17471022091496e-17
2008192	23	3.84082724996739e-17	5.11296610311558e-17
2008193	0	3.72579979342067e-17	4.97745671995388e-17
2008193	1	4.02684039573115e-17	5.43731360069357e-17
2008193	2	4.54905436015144e-17	6.00803689021949e-17
2008193	3	3.34815655077156e-17	4.02175031862971e-17
2008193	4	2.83311860788974e-17	3.63748625381067e-17
2008193	5	4.87263728353325e-17	6.92048881304331e-17
2008193	6	6.8039707672835e-17	1.0415746485255e-16
2008193	7	1.07344538693125e-16	1.77008834817685e-16
2008193	8	1.15578998232777e-16	1.69655007290541e-16
2008193	9	8.22185770922815e-17	1.10755780542702e-16
2008193	10	9.97498606027461e-17	1.32266924420611e-16
2008193	11	1.10902342139186e-16	1.44608520515264e-16
2008193	12	1.15759147674985e-16	1.49227866186492e-16
2008193	13	1.18941127180506e-16	1.57140037526112e-16
2008193	14	1.07799764555452e-16	1.49253692557496e-16
2008193	15	1.06529027115721e-16	1.47731212550074e-16
2008193	16	1.1296305863444e-16	1.57173490170658e-16
2008193	17	1.12891746288592e-16	1.58560548731783e-16
2008193	18	1.14406722566767e-16	1.63529517385252e-16
2008193	19	1.15531026643298e-16	1.69851360839384e-16
2008193	20	1.13907016039198e-16	1.69248956159031e-16
2008193	21	1.13854116472086e-16	1.68327141615333e-16
2008193	22	1.12987154231808e-16	1.67754365876825e-16
2008193	23	1.1447690510006e-16	1.69041624999473e-16
2008194	0	1.15677301013663e-16	1.70032369600366e-16
2008194	1	1.14057459747322e-16	1.70502235914889e-16
2008194	2	1.10496996137263e-16	1.70760770646623e-16
2008194	3	1.09774676819861e-16	1.73529084978855e-16
2008194	4	1.12317002461594e-16	1.59881573832591e-16
2008194	5	1.12024010911055e-16	1.48289335822084e-16
2008194	6	1.21160617829147e-16	1.70107725656367e-16
2008194	7	1.22943050746212e-16	1.69051622418179e-16
2008194	8	1.23359480224589e-16	1.61277851879558e-16
2008194	9	1.1796677285982e-16	1.59509741402477e-16
2008194	10	1.05758170734726e-16	1.44825642103118e-16
2008194	11	1.16255254924774e-16	1.51527099447687e-16
2008194	12	1.15416726232334e-16	1.48878233722773e-16
2008194	13	1.10880319103302e-16	1.42835399195588e-16
2008194	14	1.12126548596179e-16	1.46839932025007e-16
2008194	15	1.14424876291136e-16	1.61953547739042e-16
2008194	16	9.67546736892724e-17	1.42322325927508e-16
2008194	17	9.33443810623074e-17	1.40128345074574e-16
2008194	18	1.08195093125032e-16	1.61153798746647e-16
2008194	19	1.12758749723836e-16	1.68281473731071e-16
2008194	20	1.11029023474291e-16	1.68598296779208e-16
2008194	21	1.09536270376454e-16	1.69367109419933e-16
2008194	22	9.01131870524428e-17	1.33431952581655e-16
2008194	23	9.02522836476644e-17	1.288262745566e-16
2008195	0	8.97652790896168e-17	1.25573499631213e-16
2008195	1	8.92579696060318e-17	1.24627202551285e-16
2008195	2	9.01937156254496e-17	1.29295883019288e-16
2008195	3	8.78592006132227e-17	1.25087832371177e-16
2008195	4	8.63094869989236e-17	1.24672375183449e-16
2008195	5	9.00189469571143e-17	1.32409713263835e-16
2008195	6	1.0907255249352e-16	1.777976287046e-16
2008195	7	1.12328355104873e-16	1.79693522519205e-16
2008195	8	1.09070469572568e-16	1.65928021396939e-16
2008195	9	1.19309464439887e-16	1.82279421823071e-16
2008195	10	1.09497809090023e-16	1.57402494501968e-16
2008195	11	1.12922091066221e-16	1.56514751785052e-16
2008195	12	1.07711772747296e-16	1.41888040816846e-16
2008195	13	1.05197425436074e-16	1.35462590109861e-16
2008195	14	1.03327917990101e-16	1.29275316466142e-16
2008195	15	9.64164546784074e-17	1.17884675316373e-16
2008195	16	8.80686355413653e-17	1.07631791891876e-16
2008195	17	8.11788477978936e-17	9.93725425869172e-17
2008195	18	7.59769274308132e-17	9.34179386611556e-17
2008195	19	7.20221963102926e-17	8.77666562019797e-17
2008195	20	6.91590216456216e-17	8.46145507866058e-17
2008195	21	6.78173880089328e-17	8.34372125726403e-17
2008195	22	6.61611633362149e-17	8.18582413303752e-17
2008195	23	6.51074769100285e-17	8.07687840999135e-17
2008196	0	6.3585313467933e-17	8.07980849892958e-17
2008196	1	6.26960103271519e-17	8.0633731253961e-17
2008196	2	6.08865834896437e-17	7.87603208226046e-17
2008196	3	6.01844198107556e-17	7.73908136024258e-17
2008196	4	6.05744200812789e-17	7.65443451221574e-17
2008196	5	6.43131279590875e-17	7.82706304965936e-17
2008196	6	7.161744404017e-17	8.75993909262608e-17
2008196	7	7.69752282990082e-17	9.36192627324345e-17
2008196	8	1.29811220308618e-16	1.85254471272152e-16
2008196	9	1.30534575084213e-16	1.85463223525909e-16
2008196	10	1.24888014323934e-16	1.72546012271244e-16
2008196	11	1.20385747326512e-16	1.59105292067956e-16
2008196	12	1.15950346154623e-16	1.47391374599477e-16
2008196	13	1.10957041200586e-16	1.37107629616573e-16
2008196	14	1.06311740432189e-16	1.30314758240769e-16
2008196	15	9.85285468901665e-17	1.20345947936579e-16
2008196	16	8.88105546532739e-17	1.10162711508086e-16
2008196	17	7.90012738680024e-17	1.01147301462758e-16
2008196	18	7.29653480627791e-17	9.3209300415663e-17
2008196	19	7.01561946938027e-17	8.71468273167583e-17
2008196	20	6.6904557277587e-17	8.19425452693449e-17
2008196	21	6.41025363085472e-17	7.89984391012002e-17
2008196	22	6.6414765052825e-17	7.98787201000962e-17
2008196	23	6.44183633138768e-17	7.67472164992542e-17
2008197	0	5.52899755728251e-17	6.77197890116827e-17
2008197	1	4.47339934164554e-17	5.44167510761043e-17
2008197	2	4.45705833194443e-17	5.1421510925962e-17
2008197	3	5.54581074182615e-17	6.64438620733996e-17
2008197	4	1.23143331798241e-16	1.67811173137304e-16
2008197	5	1.23661321836932e-16	1.66925697876067e-16
2008197	6	1.24488916755959e-16	1.66960280513958e-16
2008197	7	6.31524144024984e-17	7.85331532124073e-17
2008197	8	3.85488249372538e-17	4.65046395049192e-17
2008197	9	2.39609315553976e-17	2.76844709127136e-17
2008197	10	1.50383419214407e-17	1.70579328436971e-17
2008197	11	1.0477145280556e-17	1.17477334339155e-17
2008197	12	8.64196509236577e-18	9.62073537249549e-18
2008197	13	7.80278938997518e-18	8.67645511958088e-18
2008197	14	7.18697903567963e-18	8.07406236914601e-18
2008197	15	6.56858266180787e-18	7.55226213240473e-18
2008197	16	6.161221980628e-18	7.19341432871067e-18
2008197	17	7.47906764519663e-18	8.5571466771259e-18
2008197	18	1.19852501545024e-17	1.34802022138733e-17
2008197	19	3.8262993242946e-17	4.94181476786743e-17
2008197	20	7.17298033719875e-17	9.98449605264449e-17
2008197	21	6.94852414033054e-17	9.55151703291276e-17
2008197	22	6.43347009262009e-17	8.63824729343163e-17
2008197	23	7.01267372595692e-17	9.68469979859494e-17
2008198	0	1.02958177447748e-16	1.6530077470473e-16
2008198	1	9.86381572641598e-17	1.49825772336987e-16
2008198	2	1.08037986459042e-16	1.63156492908026e-16
2008198	3	9.64851872079953e-17	1.42303836933289e-16
2008198	4	9.37376652078717e-17	1.34438207541433e-16
2008198	5	9.19656047667007e-17	1.33008270983684e-16
2008198	6	1.12962848818039e-16	1.77114911750472e-16
2008198	7	1.16790848836082e-16	1.71110543496497e-16
2008198	8	1.19605848091677e-16	1.69316290820424e-16
2008198	9	1.1397737315046e-16	1.60660348556616e-16
2008198	10	1.05306083838874e-16	1.50755903406717e-16
2008198	11	1.17161465805323e-16	1.66905462793773e-16
2008198	12	6.12547708551568e-17	7.13817654101947e-17
2008198	13	7.08654683801303e-17	8.31267452539313e-17
2008198	14	1.14113995635694e-16	1.52450847860273e-16
2008198	15	8.41793156825979e-17	1.04120115600407e-16
2008198	16	6.33303267196725e-17	7.4748007020694e-17
2008198	17	5.10042840830716e-17	5.91151285167872e-17
2008198	18	4.3295134625949e-17	4.98421043653102e-17
2008198	19	3.8923701699155e-17	4.43451007988032e-17
2008198	20	5.73921288270218e-17	7.39004426471482e-17
2008198	21	9.21624110903764e-17	1.25898041770847e-16
2008198	22	1.19445002647742e-16	1.72063502382665e-16
2008198	23	1.20590848631057e-16	1.70783543638098e-16
2008199	0	1.22081435183248e-16	1.69503485536483e-16
2008199	1	1.23393359363373e-16	1.69740806036624e-16
2008199	2	1.2244070425711e-16	1.70824890919816e-16
2008199	3	1.22127569184781e-16	1.73892379637593e-16
2008199	4	9.72292392489666e-17	1.20223428901852e-16
2008199	5	8.17480646229775e-17	9.41495679008178e-17
2008199	6	7.50435744645198e-17	8.43506459704882e-17
2008199	7	1.24072138811217e-16	1.75286602270244e-16
2008199	8	1.25236809300726e-16	1.72756859456233e-16
2008199	9	1.21935417043912e-16	1.66654949249986e-16
2008199	10	1.12237118093832e-16	1.60089519351888e-16
2008199	11	1.06095542597341e-16	1.51285297318117e-16
2008199	12	9.81917506873721e-17	1.41179110941713e-16
2008199	13	1.11274462126006e-16	1.60194423113611e-16
2008199	14	1.06221957300132e-16	1.53018252682871e-16
2008199	15	1.16645740703353e-16	1.62380626797079e-16
2008199	16	1.14869112344358e-16	1.62962537762381e-16
2008199	17	1.11161434435059e-16	1.62601867475729e-16
2008199	18	9.37329931286969e-17	1.39786259733448e-16
2008199	19	6.47319106997053e-17	9.13978150974264e-17
2008199	20	4.06246732046288e-17	5.63680038808172e-17
2008199	21	2.71649746567238e-17	3.76047442571794e-17
2008199	22	1.97247407983161e-17	2.72942530294169e-17
2008199	23	1.60587942456789e-17	2.167660973957e-17
2008200	0	1.40655205637079e-17	1.86356323478088e-17
2008200	1	1.31597912165088e-17	1.7230423182072e-17
2008200	2	1.33293577263169e-17	1.71115815488607e-17
2008200	3	1.38814340422869e-17	1.80097166304359e-17
2008200	4	1.51254653232083e-17	1.95966867795065e-17
2008200	5	1.71092711259196e-17	2.11071795663674e-17
2008200	6	1.8512431878284e-17	2.22231932508263e-17
2008200	7	1.99516951130189e-17	2.29021152479342e-17
2008200	8	2.12899888745077e-17	2.42844499305128e-17
2008200	9	2.1016742059457e-17	2.4336414337233e-17
2008200	10	1.96121336111182e-17	2.27813536014207e-17
2008200	11	1.89619649391629e-17	2.20042379957034e-17
2008200	12	1.92620805516778e-17	2.22829378474845e-17
2008200	13	2.08243325944566e-17	2.39535760947354e-17
2008200	14	2.71425228480909e-17	3.18531063826176e-17
2008200	15	5.39424380255553e-17	6.90553494622412e-17
2008200	16	7.89039382180351e-17	1.02990477710013e-16
2008200	17	8.16256105335505e-17	1.06925047699155e-16
2008200	18	9.44169957315008e-17	1.27928384365527e-16
2008200	19	1.17461940682923e-16	1.75430194385012e-16
2008200	20	1.14654616661226e-16	1.75706570110199e-16
2008200	21	1.10648366950429e-16	1.75299008658497e-16
2008200	22	1.04680689366911e-16	1.74512998424355e-16
2008200	23	9.91898779586248e-17	1.73423360114728e-16
2008201	0	9.63178098918062e-17	1.71824537718793e-16
2008201	1	9.55542447683704e-17	1.73469604862614e-16
2008201	2	9.19178242354962e-17	1.65449172083668e-16
2008201	3	8.42118561233834e-17	1.48513594663103e-16
2008201	4	8.53356899167556e-17	1.46817344971614e-16
2008201	5	9.18531675181254e-17	1.39988861884064e-16
2008201	6	9.03052213854968e-17	1.23864175960027e-16
2008201	7	8.88221028322618e-17	1.15184987603833e-16
2008201	8	9.47719858230545e-17	1.19281201684781e-16
2008201	9	1.07216615826509e-16	1.52378139529972e-16
2008201	10	1.01043561779569e-16	1.4100599028266e-16
2008201	11	1.17481623754128e-16	1.61836615319815e-16
2008201	12	1.01804755093313e-16	1.41342429376996e-16
2008201	13	7.55492500841066e-17	1.04698988568501e-16
2008201	14	1.0791249906437e-16	1.50424904414526e-16
2008201	15	1.1948490215117e-16	1.65927059391949e-16
2008201	16	1.19982449096369e-16	1.65964555781963e-16
2008201	17	1.19878499366326e-16	1.66389511547649e-16
2008201	18	1.19582608503851e-16	1.66686412749453e-16
2008201	19	1.17764771439981e-16	1.672548231983e-16
2008201	20	1.16730769976177e-16	1.66904567337307e-16
2008201	21	1.17725010300504e-16	1.66944143735939e-16
2008201	22	1.15806561266251e-16	1.67620202211782e-16
2008201	23	1.14637455724925e-16	1.67121499146248e-16
2008202	0	1.17238800269068e-16	1.6708389783681e-16
2008202	1	1.17618191593495e-16	1.66549462662446e-16
2008202	2	1.16775025543769e-16	1.66474231930522e-16
2008202	3	1.183602165377e-16	1.67648735850636e-16
2008202	4	9.41970860407411e-17	1.23264233782991e-16
2008202	5	7.03054915828408e-17	9.9800631793786e-17
2008202	6	1.08502152886359e-16	1.53940288694653e-16
2008202	7	1.18060452132044e-16	1.6702903558973e-16
2008202	8	1.17445864093047e-16	1.66918071520615e-16
2008202	9	1.18796303988796e-16	1.66718022316391e-16
2008202	10	1.20298331250212e-16	1.64238135428979e-16
2008202	11	1.18535486896904e-16	1.56702677922757e-16
2008202	12	1.13051791561546e-16	1.46604090488459e-16
2008202	13	1.08721117872318e-16	1.46704956435972e-16
2008202	14	1.14237297065811e-16	1.59016120928656e-16
2008202	15	1.03178958391258e-16	1.30141168606159e-16
2008202	16	9.54698002611786e-17	1.18702660450703e-16
2008202	17	9.30740981321101e-17	1.1303435390369e-16
2008202	18	1.05840430565655e-16	1.34147453859101e-16
2008202	19	1.14177721008568e-16	1.4797448226531e-16
2008202	20	1.05717424759933e-16	1.3287865328087e-16
2008202	21	9.11578769182058e-17	1.10731113500027e-16
2008202	22	7.68635194338704e-17	9.00809919217048e-17
2008202	23	6.46443405383002e-17	7.38202270995598e-17
2008203	0	5.74067096952417e-17	6.47337079352697e-17
2008203	1	5.49926168000411e-17	6.03431460482684e-17
2008203	2	5.28934731513421e-17	5.90746607549037e-17
2008203	3	5.20567735025243e-17	5.81372199492912e-17
2008203	4	5.21109523910518e-17	5.71579061211952e-17
2008203	5	5.0507203637907e-17	5.52756405101532e-17
2008203	6	4.47754196189096e-17	4.94093024156023e-17
2008203	7	3.34138344257637e-17	3.66741587403786e-17
2008203	8	2.27643967722609e-17	2.4857315437567e-17
2008203	9	2.14154549409585e-17	2.59600509636785e-17
2008203	10	3.02469062109449e-17	3.88024297940639e-17
2008203	11	4.44115434491451e-17	5.77634042449552e-17
2008203	12	7.32313633308263e-17	1.00491738615505e-16
2008203	13	8.05888836903553e-17	1.20428616596237e-16
2008203	14	1.01465577264359e-16	1.67354040091991e-16
2008203	15	1.11575743586346e-16	1.67331095704465e-16
2008203	16	1.14675149921923e-16	1.67307148466798e-16
2008203	17	1.14357467653815e-16	1.66965069418292e-16
2008203	18	9.09103798705345e-17	1.24068176522192e-16
2008203	19	1.06767177915874e-16	1.61699291039531e-16
2008203	20	9.12970193199844e-17	1.43934778249295e-16
2008203	21	8.49956804189003e-17	1.42937448001536e-16
2008203	22	9.65192588104428e-17	1.67593624152903e-16
2008203	23	9.5637455241874e-17	1.67683504357056e-16
2008204	0	9.79840605748008e-17	1.68000015934258e-16
2008204	1	9.88340130392557e-17	1.68190591096138e-16
2008204	2	9.94884816429368e-17	1.68832145804413e-16
2008204	3	9.77945728980256e-17	1.68894235223528e-16
2008204	4	1.00869830142534e-16	1.68612364443404e-16
2008204	5	1.06222860743129e-16	1.68235424337392e-16
2008204	6	1.10048442620842e-16	1.68931466528051e-16
2008204	7	1.12674675600059e-16	1.71478618518408e-16
2008204	8	1.13504114212891e-16	1.75663528107824e-16
2008204	9	1.14686031707871e-16	1.77928299607328e-16
2008204	10	1.1706984713796e-16	1.76168614913566e-16
2008204	11	1.18837294549678e-16	1.64010982594256e-16
2008204	12	1.08047230105342e-16	1.38006943115559e-16
2008204	13	9.5882231784056e-17	1.19371019177e-16
2008204	14	9.28832695929728e-17	1.14902338629038e-16
2008204	15	7.64647032121391e-17	9.01194677952918e-17
2008204	16	6.81613133101067e-17	7.84392741337642e-17
2008204	17	6.67945548089616e-17	7.41528724979404e-17
2008204	18	6.76268315945619e-17	7.40164471311404e-17
2008204	19	9.13368138590028e-17	1.06495773187503e-16
2008204	20	1.00129258565803e-16	1.13740462976504e-16
2008204	21	1.05619936879488e-16	1.18185704037247e-16
2008204	22	1.0734748555351e-16	1.20363779810203e-16
2008204	23	1.08393870762287e-16	1.22698212675573e-16
2008205	0	1.07282180197652e-16	1.22321836083487e-16
2008205	1	1.0509918177119e-16	1.20557449438457e-16
2008205	2	1.00471667299436e-16	1.17249322896695e-16
2008205	3	9.4458344604808e-17	1.11446079193609e-16
2008205	4	8.67167374848197e-17	1.01794941548886e-16
2008205	5	7.87549608395943e-17	9.10314429029856e-17
2008205	6	6.92950769184737e-17	7.8236727871848e-17
2008205	7	1.27645513708098e-16	1.82962525276937e-16
2008205	8	1.28737542513861e-16	1.82952345915849e-16
2008205	9	1.29384214682521e-16	1.82992014398189e-16
2008205	10	1.31062221835716e-16	1.84118207381528e-16
2008205	11	1.29894405604184e-16	1.76495565971713e-16
2008205	12	1.26197561478569e-16	1.68416944553273e-16
2008205	13	1.21310177500614e-16	1.59914887393286e-16
2008205	14	1.17086738190193e-16	1.53163572319091e-16
2008205	15	1.12907612711523e-16	1.47227172263608e-16
2008205	16	1.07467699424075e-16	1.4089936329243e-16
2008205	17	9.97834593988654e-17	1.33628299816936e-16
2008205	18	9.15475597841466e-17	1.26182638014514e-16
2008205	19	8.62299964171327e-17	1.23856864560417e-16
2008205	20	8.85920826299855e-17	1.35508136831762e-16
2008205	21	8.89420137298237e-17	1.36266854311473e-16
2008205	22	8.19512264485921e-17	1.23698180885222e-16
2008205	23	7.66825276846344e-17	1.14613836170235e-16
2008206	0	7.16184429338238e-17	1.11678753214593e-16
2008206	1	6.89213145024637e-17	1.10014825345306e-16
2008206	2	6.77931905588626e-17	1.08166129622365e-16
2008206	3	6.67588784904552e-17	1.07110572297709e-16
2008206	4	6.65593258752796e-17	1.06491313399089e-16
2008206	5	7.04187181089042e-17	1.08887568027022e-16
2008206	6	8.66824740605152e-17	1.27344198429971e-16
2008206	7	1.20501396673169e-16	1.83879283381295e-16
2008206	8	1.25799836819746e-16	1.84085410395397e-16
2008206	9	1.22279117554136e-16	1.69541742622734e-16
2008206	10	1.09479131225936e-16	1.44211686718424e-16
2008206	11	1.00362012666403e-16	1.27619232182073e-16
2008206	12	9.53116624484791e-17	1.16779011708462e-16
2008206	13	9.17899327596966e-17	1.09940207396475e-16
2008206	14	8.85082058753242e-17	1.03475186986399e-16
2008206	15	8.6009939393692e-17	9.7908456226343e-17
2008206	16	8.53022824852565e-17	9.42370449028122e-17
2008206	17	8.40505366951155e-17	9.12125688325566e-17
2008206	18	8.247713936373e-17	8.80797202797193e-17
2008206	19	8.08203774448946e-17	8.5785672297554e-17
2008206	20	7.96559615556551e-17	8.36904990770415e-17
2008206	21	7.71517956810806e-17	8.05702805349883e-17
2008206	22	7.32114399602141e-17	7.62139178870677e-17
2008206	23	6.90503138053309e-17	7.15897565084831e-17
2008207	0	6.55592942459533e-17	6.77799951657984e-17
2008207	1	6.29626641331682e-17	6.48650066714976e-17
2008207	2	6.04782258276099e-17	6.22500951915468e-17
2008207	3	5.82129891738823e-17	5.99994520273356e-17
2008207	4	5.68142569239436e-17	5.85689607213311e-17
2008207	5	5.62951501139089e-17	5.81171418130808e-17
2008207	6	5.87419470462487e-17	6.14123860750735e-17
2008207	7	6.83609243362737e-17	7.44102673057158e-17
2008207	8	8.31592667732874e-17	9.40093144654186e-17
2008207	9	9.09462147233347e-17	1.02568403938195e-16
2008207	10	8.85256500122544e-17	9.8061104678986e-17
2008207	11	7.68137072819922e-17	8.19659886300033e-17
2008207	12	6.87570813975718e-17	7.16745246925788e-17
2008207	13	6.67431796226592e-17	6.9527891444502e-17
2008207	14	6.76555182642348e-17	7.14279552608252e-17
2008207	15	6.74962117231045e-17	7.10799607887744e-17
2008207	16	6.6452840756293e-17	6.98180187086427e-17
2008207	17	6.52791782972791e-17	6.83201813716292e-17
2008207	18	6.54722804549927e-17	6.77752732490723e-17
2008207	19	6.63321429324362e-17	6.83161662277858e-17
2008207	20	6.68205152707437e-17	6.91558055942168e-17
2008207	21	6.76930691694304e-17	6.988202053951e-17
2008207	22	6.81077190877046e-17	7.0451027007489e-17
2008207	23	6.79553005009531e-17	7.08664614978956e-17
2008208	0	6.73865515968225e-17	7.10920991649947e-17
2008208	1	6.70969132220764e-17	7.1274340359102e-17
2008208	2	6.71789649632529e-17	7.1499128213487e-17
2008208	3	6.75579092212014e-17	7.1798266854078e-17
2008208	4	6.84712113574811e-17	7.21341909172419e-17
2008208	5	6.91526677180693e-17	7.22775961432109e-17
2008208	6	6.93205443904495e-17	7.18797916984032e-17
2008208	7	7.00753881283613e-17	7.26233174471904e-17
2008208	8	7.19832711298875e-17	7.47400266286433e-17
2008208	9	7.32875283982187e-17	7.66299955404801e-17
2008208	10	7.89585090978364e-17	8.40542489539205e-17
2008208	11	8.33694680188937e-17	9.00295383368968e-17
2008208	12	8.71209026535446e-17	9.50920302188274e-17
2008208	13	8.79914408176266e-17	9.64677021628588e-17
2008208	14	8.84210647230194e-17	9.70834583690921e-17
2008208	15	8.69936432021667e-17	9.47368788089704e-17
2008208	16	8.48098230146352e-17	9.16488107195011e-17
2008208	17	8.18870507498628e-17	8.75072020192406e-17
2008208	18	7.9131805306247e-17	8.34182157055328e-17
2008208	19	7.74875457319202e-17	8.04910671431124e-17
2008208	20	7.6519335324038e-17	7.88084659373632e-17
2008208	21	7.58871124326053e-17	7.79796975084268e-17
2008208	22	7.55912040829424e-17	7.72531312799749e-17
2008208	23	7.48069260960363e-17	7.61263577847537e-17
2008209	0	7.35195414941062e-17	7.47496175424749e-17
2008209	1	7.21444022572196e-17	7.34245391674536e-17
2008209	2	7.10945219815697e-17	7.24110932124499e-17
2008209	3	7.0289457682665e-17	7.15757606539029e-17
2008209	4	6.95691688140086e-17	7.08237434245451e-17
2008209	5	6.86358143412642e-17	6.98525138652409e-17
2008209	6	6.70777063269747e-17	6.82283361770553e-17
2008209	7	6.53249935393855e-17	6.64257403737771e-17
2008209	8	6.39199789808883e-17	6.49751890703464e-17
2008209	9	6.45707989234998e-17	6.57909470159124e-17
2008209	10	6.63707624563412e-17	6.81450178772207e-17
2008209	11	6.59286844289379e-17	6.80865096942114e-17
2008209	12	6.53397195319312e-17	6.79933096943534e-17
2008209	13	6.31114626872116e-17	6.56410425222721e-17
2008209	14	6.08917505296408e-17	6.34259112796497e-17
2008209	15	5.84349778904141e-17	6.05888680038466e-17
2008209	16	5.60237155461413e-17	5.78507301544783e-17
2008209	17	5.35006637079506e-17	5.50223908087866e-17
2008209	18	5.13015527904414e-17	5.26604930826947e-17
2008209	19	5.00450209904134e-17	5.12119660250692e-17
2008209	20	5.03971088625433e-17	5.14675203130258e-17
2008209	21	5.18991522755583e-17	5.28805079911671e-17
2008209	22	5.3765531685109e-17	5.47850146262712e-17
2008209	23	5.57744824714778e-17	5.67610002452073e-17
2008210	0	5.72457407081219e-17	5.83602563551629e-17
2008210	1	5.83555034140442e-17	5.94778771003618e-17
2008210	2	5.93955857850688e-17	6.05437673454295e-17
2008210	3	6.09049045131957e-17	6.20895109491094e-17
2008210	4	6.3087463907448e-17	6.43378389128916e-17
2008210	5	6.5367102847876e-17	6.6920374011833e-17
2008210	6	6.72266956929013e-17	6.87285242639821e-17
2008210	7	6.77189229694481e-17	6.92451473427458e-17
2008210	8	6.70504627296963e-17	6.87839502219528e-17
2008210	9	6.58721863810542e-17	6.81677686270597e-17
2008210	10	6.575464543659e-17	6.91754192219431e-17
2008210	11	6.62669375460362e-17	7.10555836553785e-17
2008210	12	6.63223985296784e-17	7.15702896476409e-17
2008210	13	6.60189065621599e-17	7.17165973837258e-17
2008210	14	6.58095776780163e-17	7.11832293418992e-17
2008210	15	6.60133212588796e-17	7.11280852303936e-17
2008210	16	6.67897307405112e-17	7.16278673459167e-17
2008210	17	6.79287269024678e-17	7.21648058139212e-17
2008210	18	6.96380395602374e-17	7.34414275980299e-17
2008210	19	7.10599698606836e-17	7.4831330744631e-17
2008210	20	7.35941538132128e-17	7.67741980346489e-17
2008210	21	7.54464437100391e-17	7.87522715904087e-17
2008210	22	7.72633674291358e-17	8.00383249634332e-17
2008210	23	7.82222884678977e-17	8.06165143467622e-17
2008211	0	7.85601739404408e-17	8.08484954037111e-17
2008211	1	7.86473050858578e-17	8.1001089727145e-17
2008211	2	7.88060509068759e-17	8.11665089541755e-17
2008211	3	7.91623946715564e-17	8.13963740619618e-17
2008211	4	7.94152631138299e-17	8.17831452167758e-17
2008211	5	7.9778138249884e-17	8.21916358998356e-17
2008211	6	7.99344780536983e-17	8.22338085194116e-17
2008211	7	7.97217630346582e-17	8.1989229811624e-17
2008211	8	7.91074943133902e-17	8.15086737587969e-17
2008211	9	7.85908077101736e-17	8.13022257097151e-17
2008211	10	7.8593921698387e-17	8.19488584618061e-17
2008211	11	7.89137771714468e-17	8.30196028511142e-17
2008211	12	7.85760140450406e-17	8.31885127776489e-17
2008211	13	7.84074991635027e-17	8.3649503150562e-17
2008211	14	7.77807213659413e-17	8.30447505166949e-17
2008211	15	7.69421646832144e-17	8.20268105318985e-17
2008211	16	7.60058995381645e-17	8.07842006294133e-17
2008211	17	7.49778010038569e-17	7.93769295525926e-17
2008211	18	7.32365376725048e-17	7.69573639486558e-17
2008211	19	7.01202069921332e-17	7.33043171896851e-17
2008211	20	6.3539513249429e-17	6.5914002421346e-17
2008211	21	5.50811717753618e-17	5.67873315548804e-17
2008211	22	4.81385454685697e-17	4.95178372762097e-17
2008211	23	4.45982885850213e-17	4.58285373213234e-17
2008212	0	4.42587897351679e-17	4.54776897350602e-17
2008212	1	4.54965641221619e-17	4.67806497288657e-17
2008212	2	4.74791612484162e-17	4.8952185034765e-17
2008212	3	4.95303121728152e-17	5.11682365602771e-17
2008212	4	5.15718744597715e-17	5.3306243153308e-17
2008212	5	5.34904219431444e-17	5.51757786842502e-17
2008212	6	5.47781214490044e-17	5.6407308140933e-17
2008212	7	5.52773242721375e-17	5.69150570542741e-17
2008212	8	5.65049414484123e-17	5.82749442453999e-17
2008212	9	5.74743010931985e-17	5.94258097595884e-17
2008212	10	5.93695300899298e-17	6.17277976918781e-17
2008212	11	6.26166356646075e-17	6.56384017756116e-17
2008212	12	6.33464754501835e-17	6.78124610478411e-17
2008212	13	6.14219201599191e-17	6.85538944121577e-17
2008212	14	6.31932683071481e-17	7.3629194591139e-17
2008212	15	6.45810987714445e-17	7.70956746293577e-17
2008212	16	6.29312118112845e-17	7.49421292357727e-17
2008212	17	6.12010020040814e-17	7.21790064735384e-17
2008212	18	6.11845531974616e-17	7.01586379469661e-17
2008212	19	6.22857293873194e-17	6.71806367108957e-17
2008212	20	6.04749452753501e-17	6.35469506933945e-17
2008212	21	5.78570863495339e-17	6.06857325065478e-17
2008212	22	5.61463471806387e-17	5.89093561415728e-17
2008212	23	5.51766006294258e-17	5.79827519559764e-17
2008213	0	5.50371246712246e-17	5.80204575431132e-17
2008213	1	5.57649591488748e-17	5.8804166715429e-17
2008213	2	5.68702617298658e-17	5.97136467978867e-17
2008213	3	5.75747179037607e-17	6.04452260258665e-17
2008213	4	5.78697444838167e-17	6.07448507540493e-17
2008213	5	5.81372902999722e-17	6.05519694588463e-17
2008213	6	5.79853615390578e-17	6.02360182926681e-17
2008213	7	5.7710608161741e-17	6.00071359963932e-17
2008213	8	5.82384221577729e-17	6.07213153884915e-17
2008213	9	5.9007957439726e-17	6.20336524307267e-17
2008213	10	6.20289964147367e-17	6.6027530281772e-17
2008213	11	6.31008631928554e-17	6.75464954478724e-17
2008213	12	6.32959061636208e-17	6.80708451242812e-17
2008213	13	6.33530601697883e-17	6.85565898495118e-17
2008213	14	6.2890028810871e-17	6.8084996611487e-17
2008213	15	6.2276356163947e-17	6.72457882128096e-17
2008213	16	6.17643337536596e-17	6.64268518389774e-17
2008213	17	6.1178589929951e-17	6.53512439284131e-17
2008213	18	6.1019666045472e-17	6.47083647323285e-17
2008213	19	6.1011146645541e-17	6.39092826441927e-17
2008213	20	6.01976413324865e-17	6.28147710858628e-17
2008213	21	5.89590687015984e-17	6.17216212919013e-17
2008213	22	5.89478468668424e-17	6.17960700251645e-17
2008213	23	6.00914871815953e-17	6.25613696634415e-17
2008214	0	6.15319844294042e-17	6.40250554477424e-17
2008214	1	6.31918822113508e-17	6.58399174269748e-17
2008214	2	6.40907992500318e-17	6.69697821560791e-17
2008214	3	6.45279667795495e-17	6.75637548229036e-17
2008214	4	6.48797498531329e-17	6.78962641524454e-17
2008214	5	6.47787475754767e-17	6.77412101457712e-17
2008214	6	6.36192987325278e-17	6.67466206126008e-17
2008214	7	6.24602329542592e-17	6.6117849532486e-17
2008214	8	6.01746925471303e-17	6.50910743583637e-17
2008214	9	5.93824039186559e-17	6.70315997853877e-17
2008214	10	5.98239793399166e-17	7.16172742581575e-17
2008214	11	6.5229572386313e-17	8.22837207777716e-17
2008214	12	9.06724134976454e-17	1.27753376518841e-16
2008214	13	1.14862561763002e-16	1.71489852538457e-16
2008214	14	1.19269110667903e-16	1.74460277552885e-16
2008214	15	1.17923023088334e-16	1.70132387945362e-16
2008214	16	1.20369677454902e-16	1.78892335943201e-16
2008214	17	1.17586169919757e-16	1.769103526107e-16
2008214	18	1.19455830863059e-16	1.81271124625006e-16
2008214	19	1.17370591155419e-16	1.81263750401775e-16
2008214	20	1.17146352494138e-16	1.81286899441532e-16
2008214	21	1.14881389932295e-16	1.74016009172087e-16
2008214	22	1.15930044628648e-16	1.71759524932864e-16
2008214	23	1.04167950617762e-16	1.48967052320898e-16
2008215	0	1.15273838132558e-16	1.66177934536678e-16
2008215	1	1.15162514772548e-16	1.61673456547557e-16
2008215	2	1.18956017615049e-16	1.66389828711542e-16
2008215	3	1.11812948530373e-16	1.36881645257235e-16
2008215	4	1.07488132754876e-16	1.28441829766316e-16
2008215	5	1.04429907125644e-16	1.23486721355743e-16
2008215	6	1.03306184873123e-16	1.23152136114232e-16
2008215	7	1.06727679168115e-16	1.33137400394612e-16
2008215	8	1.18094214197569e-16	1.55494655083209e-16
2008215	9	1.22011901109312e-16	1.59739298602909e-16
2008215	10	1.23504255766014e-16	1.58974553335095e-16
2008215	11	1.21299647418155e-16	1.53992202762921e-16
2008215	12	1.16517711966301e-16	1.46364441799771e-16
2008215	13	1.12524317996489e-16	1.38214882043608e-16
2008215	14	1.09745608237471e-16	1.33293053873731e-16
2008215	15	1.06402088837618e-16	1.27959080704388e-16
2008215	16	1.04363223698038e-16	1.24317677990806e-16
2008215	17	1.03449104210512e-16	1.22316732213857e-16
2008215	18	1.02447685376355e-16	1.19630155648366e-16
2008215	19	1.01807879959027e-16	1.17757099879734e-16
2008215	20	1.01124511386545e-16	1.1622604233318e-16
2008215	21	9.98984639965242e-17	1.14550513351337e-16
2008215	22	9.70438905717011e-17	1.13185633093712e-16
2008215	23	9.39218085908557e-17	1.11373737162285e-16
2008216	0	9.02268237059891e-17	1.07367998587853e-16
2008216	1	8.75065801423786e-17	1.03672258438278e-16
2008216	2	8.38286982491559e-17	9.94567139910388e-17
2008216	3	7.94944769512195e-17	9.54274436920641e-17
2008216	4	7.58953801281004e-17	9.18680654752461e-17
2008216	5	7.36614480517567e-17	8.87687619078908e-17
2008216	6	7.30737817561478e-17	8.46176094206373e-17
2008216	7	6.86478444750411e-17	7.85664931075271e-17
2008216	8	6.31825423058222e-17	7.25537965622248e-17
2008216	9	8.91967700125447e-17	1.20432397191243e-16
2008216	10	9.20963629995967e-17	1.33299713244076e-16
2008216	11	1.21700076884601e-16	1.70702903659383e-16
2008216	12	1.16102511488799e-16	1.55491504244546e-16
2008216	13	1.09087097678101e-16	1.43197931956825e-16
2008216	14	9.83174878961546e-17	1.27139993637513e-16
2008216	15	8.6751327825273e-17	1.0864760081305e-16
2008216	16	7.70098861142344e-17	9.19821674265698e-17
2008216	17	6.89604621242784e-17	7.91090448460887e-17
2008216	18	5.90655004427324e-17	6.79769572078805e-17
2008216	19	5.19797067128257e-17	5.98163198797632e-17
2008216	20	4.94500081040399e-17	5.68260883510305e-17
2008216	21	5.73502068087964e-17	7.03788182300125e-17
2008216	22	5.6382575164256e-17	6.72651624234559e-17
2008216	23	5.36122402992128e-17	6.02309634710838e-17
2008217	0	5.94242106105603e-17	7.16609736171635e-17
2008217	1	5.68922808197318e-17	6.72436232039896e-17
2008217	2	4.89546148640513e-17	6.07469051389174e-17
2008217	3	1.0863659057709e-16	1.6987762493745e-16
2008217	4	1.09850556543863e-16	1.70947354057139e-16
2008217	5	1.14078967265579e-16	1.7250197223897e-16
2008217	6	1.1843954381748e-16	1.7126085107091e-16
2008217	7	1.15891726848133e-16	1.61154792928374e-16
2008217	8	1.07265115386852e-16	1.47628467987343e-16
2008217	9	1.21220139136291e-16	1.6726996562404e-16
2008217	10	1.20554648789661e-16	1.67122852923403e-16
2008217	11	8.67816561756851e-17	1.2198216725681e-16
2008217	12	8.93247741706757e-17	1.27403903708406e-16
2008217	13	1.15045664521179e-16	1.59575695601942e-16
2008217	14	1.19841861684755e-16	1.65304682330608e-16
2008217	15	1.16089674112269e-16	1.66710782252383e-16
2008217	16	1.1612142451755e-16	1.66322276370115e-16
2008217	17	1.14864186316802e-16	1.66529773643012e-16
2008217	18	1.13909277798251e-16	1.66523036528348e-16
2008217	19	1.13984231688571e-16	1.66396953666552e-16
2008217	20	1.14011097042622e-16	1.66699964624259e-16
2008217	21	9.9388166382703e-17	1.33159482650186e-16
2008217	22	9.23121408785153e-17	1.22818267577571e-16
2008217	23	1.15235069135119e-16	1.68206162151118e-16
2008218	0	1.16623313703696e-16	1.68203902422127e-16
2008218	1	1.16652750583223e-16	1.68396010654461e-16
2008218	2	1.15367567799206e-16	1.68492186364892e-16
2008218	3	1.14068619953617e-16	1.68438190059769e-16
2008218	4	7.54225766560916e-17	1.04867295311951e-16
2008218	5	7.2699887052779e-17	9.81196346742715e-17
2008218	6	7.68250194664234e-17	1.00745116250736e-16
2008218	7	8.28233142644142e-17	1.0672355269942e-16
2008218	8	1.19332289363658e-16	1.68130639517588e-16
2008218	9	1.19934699974071e-16	1.67850374527483e-16
2008218	10	1.18959971198866e-16	1.58273859812768e-16
2008218	11	1.10353556126256e-16	1.42023931316781e-16
2008218	12	1.04554930966755e-16	1.32385178970715e-16
2008218	13	1.00453556702348e-16	1.24759051349402e-16
2008218	14	9.65865392263582e-17	1.17856894333435e-16
2008218	15	9.33243818097635e-17	1.12505438673387e-16
2008218	16	9.23527614821279e-17	1.14407843437452e-16
2008218	17	8.96017670901318e-17	1.16658336442242e-16
2008218	18	8.76961749006632e-17	1.20558973088584e-16
2008218	19	8.49867422105464e-17	1.18777792120884e-16
2008218	20	8.35649065701865e-17	1.17793259613232e-16
2008218	21	9.20651952500777e-17	1.376283707197e-16
2008218	22	1.07949404317137e-16	1.79172786795059e-16
2008218	23	1.02646464073202e-16	1.62493618014492e-16
2008219	0	9.72554563424977e-17	1.4874142135592e-16
2008219	1	9.26229712986574e-17	1.38581732312002e-16
2008219	2	8.94956532472348e-17	1.32031562183685e-16
2008219	3	8.54753881126013e-17	1.2827238457248e-16
2008219	4	8.70178255428994e-17	1.32348252144057e-16
2008219	5	8.71981774092351e-17	1.32097695711144e-16
2008219	6	9.03704958920722e-17	1.35695555798033e-16
2008219	7	9.25010967953554e-17	1.35782259900669e-16
2008219	8	9.1429643995626e-17	1.30992149426199e-16
2008219	9	9.01753972345514e-17	1.25516811196779e-16
2008219	10	8.87981733216419e-17	1.1929381088252e-16
2008219	11	8.70332377994693e-17	1.14417233359235e-16
2008219	12	8.23595975160801e-17	1.08183660242989e-16
2008219	13	7.80343088689393e-17	1.03136049512075e-16
2008219	14	7.72513781958034e-17	9.93856972648206e-17
2008219	15	7.68502146270431e-17	9.64901438485215e-17
2008219	16	7.68989972804338e-17	9.40848651101483e-17
2008219	17	7.69380430326184e-17	9.19248794722897e-17
2008219	18	7.60790621036383e-17	8.96302273193853e-17
2008219	19	7.46220286470128e-17	8.76054312289858e-17
2008219	20	7.30880794753632e-17	8.59112776109241e-17
2008219	21	7.15169961007315e-17	8.43067772665708e-17
2008219	22	7.01297151873107e-17	8.28565817867138e-17
2008219	23	6.90936451254557e-17	8.18472038230859e-17
2008220	0	6.78815824177822e-17	8.13254420972576e-17
2008220	1	6.71095759944798e-17	8.12860778904011e-17
2008220	2	6.72436136990642e-17	8.20982864509261e-17
2008220	3	6.73947245762576e-17	8.26895445230302e-17
2008220	4	6.82273371366208e-17	8.33766096055759e-17
2008220	5	7.12495018125302e-17	8.40701807857494e-17
2008220	6	7.70304127147688e-17	9.05403743725725e-17
2008220	7	8.08919613420048e-17	9.4987418751047e-17
2008220	8	8.27783039711657e-17	9.61742127517715e-17
2008220	9	8.53979365989726e-17	9.98274680142844e-17
2008220	10	9.03017260938651e-17	1.07402310431036e-16
2008220	11	9.22055036053448e-17	1.10231318395551e-16
2008220	12	9.02411362676981e-17	1.07512351218658e-16
2008220	13	8.59462397738113e-17	1.01377401113324e-16
2008220	14	8.0277342187074e-17	9.27813797422225e-17
2008220	15	7.43940605781882e-17	8.3456427292438e-17
2008220	16	6.88440192372588e-17	7.67514090298344e-17
2008220	17	1.15549836354497e-16	1.59193145704088e-16
2008220	18	1.0222518943705e-16	1.42286102067963e-16
2008220	19	1.0696706554e-16	1.36121829512896e-16
2008220	20	1.23720406231899e-16	1.81440693644718e-16
2008220	21	1.20668653856006e-16	1.81157784625352e-16
2008220	22	1.15753139384899e-16	1.80811084749203e-16
2008220	23	1.1657618748106e-16	1.81501630606104e-16
2008221	0	9.10499107576216e-17	1.42970120435999e-16
2008221	1	1.03684989074566e-16	1.57365024849679e-16
2008221	2	1.10050076285367e-16	1.73993220328297e-16
2008221	3	1.17454793432498e-16	1.72723063604095e-16
2008221	4	1.19924975562798e-16	1.71878044275278e-16
2008221	5	1.21206730936509e-16	1.69271628208518e-16
2008221	6	1.21183734154944e-16	1.67785236133565e-16
2008221	7	1.22470316762875e-16	1.642750123319e-16
2008221	8	1.20722814137877e-16	1.59893081068245e-16
2008221	9	1.16734265736334e-16	1.51820183604507e-16
2008221	10	1.13175636223653e-16	1.52031903257784e-16
2008221	11	1.04317503395004e-16	1.45811201570439e-16
2008221	12	9.10911624539621e-17	1.27719597112557e-16
2008221	13	1.08228816696749e-16	1.51796031137972e-16
2008221	14	1.12241611599028e-16	1.57725999883969e-16
2008221	15	1.18381376971761e-16	1.64869033450636e-16
2008221	16	1.20826150067598e-16	1.59490853206008e-16
2008221	17	1.23617136261309e-16	1.68314622356371e-16
2008221	18	1.22276427108837e-16	1.67384174338037e-16
2008221	19	1.00252165290001e-16	1.39262682744087e-16
2008221	20	1.07502482317074e-16	1.50293387569906e-16
2008221	21	1.04236839178826e-16	1.36178923884013e-16
2008221	22	1.06500964730165e-16	1.41816457459726e-16
2008221	23	1.18969518343733e-16	1.67458012194507e-16
2008222	0	1.18736951180278e-16	1.67259130704612e-16
2008222	1	1.1968344030283e-16	1.67019801632253e-16
2008222	2	1.20004675248184e-16	1.67029296532604e-16
2008222	3	1.20662046023028e-16	1.67541559957516e-16
2008222	4	1.20410444805649e-16	1.674116263239e-16
2008222	5	1.20338817730779e-16	1.67370275627501e-16
2008222	6	1.20830660957053e-16	1.67188519127444e-16
2008222	7	1.13852779677985e-16	1.46509919476075e-16
2008222	8	1.13951854054959e-16	1.42707663876763e-16
2008222	9	1.0697723876854e-16	1.29750172966859e-16
2008222	10	1.00633440843202e-16	1.2002639446689e-16
2008222	11	9.44599893455321e-17	1.11997326796505e-16
2008222	12	8.70611540976869e-17	1.03827372528291e-16
2008222	13	7.6426468926406e-17	9.06938145652837e-17
2008222	14	6.40918055866982e-17	7.58308853292355e-17
2008222	15	5.34236947088919e-17	6.29853437436883e-17
2008222	16	4.42110072199581e-17	5.24041722586345e-17
2008222	17	3.65988529699353e-17	4.39886922475072e-17
2008222	18	3.22592767350603e-17	3.95836545615912e-17
2008222	19	3.15381888465113e-17	3.90472937782972e-17
2008222	20	3.41740471410844e-17	4.26925055170239e-17
2008222	21	3.98703473199794e-17	4.79792975079174e-17
2008222	22	4.38448203210579e-17	5.28559353364716e-17
2008222	23	4.8284067326484e-17	5.71130512978194e-17
2008223	0	5.18037089831487e-17	6.06021450250301e-17
2008223	1	5.4292977208924e-17	6.33675658971881e-17
2008223	2	5.64238596183373e-17	6.62306174412927e-17
2008223	3	5.86757394892867e-17	6.82764443926386e-17
2008223	4	6.01166827756227e-17	6.90145530340357e-17
2008223	5	6.04069986539928e-17	6.90888118462653e-17
2008223	6	6.04822468712453e-17	6.94378986820714e-17
2008223	7	6.06982519331284e-17	6.96718774362409e-17
2008223	8	6.07221308003989e-17	6.92460361925041e-17
2008223	9	6.06766481032649e-17	6.85795065559806e-17
2008223	10	6.14159771882466e-17	6.89044939592778e-17
2008223	11	6.42944454359839e-17	7.18632929825241e-17
2008223	12	6.50340969847035e-17	7.22052767626931e-17
2008223	13	6.40618879584282e-17	7.0529592780128e-17
2008223	14	6.00425168893371e-17	6.58577035711146e-17
2008223	15	5.79181888911772e-17	6.33986136902356e-17
2008223	16	5.54586043696835e-17	6.23895189450885e-17
2008223	17	5.24339283972244e-17	5.91130227828932e-17
2008223	18	4.92964242860156e-17	5.52563198562479e-17
2008223	19	4.57844656185913e-17	5.22921886789965e-17
2008223	20	4.78953240063747e-17	5.66580045687663e-17
2008223	21	6.12771126379223e-17	8.11948464316783e-17
2008223	22	1.09255740292149e-16	1.71763092039875e-16
2008223	23	1.06450936612158e-16	1.70619639420642e-16
2008224	0	1.04749378310034e-16	1.70184372009107e-16
2008224	1	1.13060806138314e-16	1.68822516508819e-16
2008224	2	1.15647517719822e-16	1.68692396277993e-16
2008224	3	1.16447243560448e-16	1.68887519402381e-16
2008224	4	1.15341439119921e-16	1.68096385724293e-16
2008224	5	1.18342416852492e-16	1.6806524018025e-16
2008224	6	1.21586224500859e-16	1.6846056856659e-16
2008224	7	1.22719210578998e-16	1.68081969244564e-16
2008224	8	1.23025215459175e-16	1.64592312855726e-16
2008224	9	1.20975755266378e-16	1.58993730927909e-16
2008224	10	1.20517792013422e-16	1.58655793042275e-16
2008224	11	1.19588946907757e-16	1.56888417639863e-16
2008224	12	1.16353635288272e-16	1.48774713278789e-16
2008224	13	1.13421587473821e-16	1.39959945354322e-16
2008224	14	1.11232852843751e-16	1.34724819698254e-16
2008224	15	1.08312613730617e-16	1.2845743496991e-16
2008224	16	1.05224951002296e-16	1.22937027613093e-16
2008224	17	1.02608336879592e-16	1.1806130755358e-16
2008224	18	9.97067919550442e-17	1.12810330192864e-16
2008224	19	9.72560822399025e-17	1.08860140651691e-16
2008224	20	9.57510135456704e-17	1.07039184573128e-16
2008224	21	9.38307116254167e-17	1.06292465742543e-16
2008224	22	9.26334136933451e-17	1.07344151771656e-16
2008224	23	9.14565078967774e-17	1.07420616889752e-16
2008225	0	9.3328077358683e-17	1.10936758183381e-16
2008225	1	9.42898606168229e-17	1.1276224809867e-16
2008225	2	9.49263932383567e-17	1.14799688892692e-16
2008225	3	9.28530629657699e-17	1.1719986021218e-16
2008225	4	9.14890452191423e-17	1.21879089276312e-16
2008225	5	9.5126516572318e-17	1.29323764209543e-16
2008225	6	9.25040114690552e-17	1.35079441746066e-16
2008225	7	9.4583393355647e-17	1.34048847242559e-16
2008225	8	9.47277484681572e-17	1.26109228247197e-16
2008225	9	1.2747186713444e-16	1.84926270259755e-16
2008225	10	1.30009590140016e-16	1.86018892182753e-16
2008225	11	1.21396424115677e-16	1.76540374546298e-16
2008225	12	1.23198493777076e-16	1.79462879271432e-16
2008225	13	1.0317303778952e-16	1.46808746545607e-16
2008225	14	1.22174743804669e-16	1.67843497150422e-16
2008225	15	1.21604255789197e-16	1.67678343880784e-16
2008225	16	1.24158280584468e-16	1.69974668273586e-16
2008225	17	1.26270961292419e-16	1.71461052074806e-16
2008225	18	1.11876509290976e-16	1.44234419211479e-16
2008225	19	1.16334610894846e-16	1.66773359625438e-16
2008225	20	1.04213473679628e-16	1.30653061078717e-16
2008225	21	1.06870818977179e-16	1.29610427028883e-16
2008225	22	1.10583278569435e-16	1.28299807890029e-16
2008225	23	1.13847132530949e-16	1.28293059051528e-16
2008226	0	1.17373840669479e-16	1.29440240714032e-16
2008226	1	1.21097005951274e-16	1.32343415200129e-16
2008226	2	1.23066717120253e-16	1.35290330276642e-16
2008226	3	1.24119886272956e-16	1.4034983139524e-16
2008226	4	1.24991662705006e-16	1.45847573987356e-16
2008226	5	1.26702745015974e-16	1.70068491216827e-16
2008226	6	1.23752457622705e-16	1.67347210055236e-16
2008226	7	1.23222340085234e-16	1.66698779456748e-16
2008226	8	1.25993171236474e-16	1.65346176322002e-16
2008226	9	1.21963862833921e-16	1.50976985584711e-16
2008226	10	1.12242104995137e-16	1.31999225730195e-16
2008226	11	1.0639646510413e-16	1.23213711938344e-16
2008226	12	1.05092373626976e-16	1.21822767989465e-16
2008226	13	1.01585640295465e-16	1.20319868649543e-16
2008226	14	9.95038930126738e-17	1.18060861841961e-16
2008226	15	1.0000879989808e-16	1.17845052658422e-16
2008226	16	1.0494095615184e-16	1.26087897140598e-16
2008226	17	1.0131165765084e-16	1.20962921536109e-16
2008226	18	9.70513000239282e-17	1.20393905282002e-16
2008226	19	9.62956212516429e-17	1.26110940822317e-16
2008226	20	9.33030666624176e-17	1.20588287492514e-16
2008226	21	1.14389707079528e-16	1.67397560632952e-16
2008226	22	1.07092239535599e-16	1.48620786813924e-16
2008226	23	1.04380981671195e-16	1.41632998638569e-16
2008227	0	1.16175571684872e-16	1.55508621809694e-16
2008227	1	1.20684625304062e-16	1.58361954204294e-16
2008227	2	1.16082394547045e-16	1.446764046328e-16
2008227	3	1.07118686545321e-16	1.27721126650686e-16
2008227	4	1.22871888845934e-16	1.69211247246435e-16
2008227	5	1.22073822271733e-16	1.68919409957116e-16
2008227	6	1.23794019034727e-16	1.69325651705114e-16
2008227	7	1.16804644416386e-16	1.47480226053114e-16
2008227	8	1.23253667394824e-16	1.67443227536793e-16
2008227	9	1.21240872071005e-16	1.67603207609008e-16
2008227	10	1.21249039910798e-16	1.67321931373125e-16
2008227	11	1.21092291387899e-16	1.67168654289612e-16
2008227	12	1.20747085975411e-16	1.66927931096456e-16
2008227	13	9.76267914102435e-17	1.23114676511727e-16
2008227	14	8.94617497718802e-17	1.06963069979749e-16
2008227	15	8.95619598195538e-17	1.05460027460321e-16
2008227	16	9.04252286691904e-17	1.06251159560014e-16
2008227	17	9.05283513390641e-17	1.06739718963889e-16
2008227	18	9.02982315455937e-17	1.05634784944432e-16
2008227	19	9.15111878766164e-17	1.04132709405397e-16
2008227	20	9.03774721276691e-17	9.95259799326426e-17
2008227	21	8.99236357170503e-17	9.89027290864302e-17
2008227	22	8.90796553816443e-17	9.85092160541022e-17
2008227	23	8.81472774809489e-17	9.84159723551965e-17
2008228	0	8.83909420692427e-17	9.86144316975699e-17
2008228	1	8.89414461580832e-17	9.84153237624323e-17
2008228	2	8.85640481294177e-17	9.69124389440909e-17
2008228	3	8.76421419052019e-17	9.51181875055369e-17
2008228	4	8.59787279916525e-17	9.34143252130638e-17
2008228	5	8.42678767416903e-17	9.10840436514511e-17
2008228	6	8.28458774074912e-17	9.07340832246263e-17
2008228	7	8.25346080032822e-17	9.46078206024267e-17
2008228	8	9.04310963239006e-17	1.07239944912358e-16
2008228	9	9.82111978963651e-17	1.22003117358858e-16
2008228	10	1.02384562759997e-16	1.31629228153035e-16
2008228	11	1.03634937582886e-16	1.35983200149932e-16
2008228	12	1.04672718989401e-16	1.39214618218645e-16
2008228	13	1.06126160673911e-16	1.4267253599892e-16
2008228	14	1.04994084601665e-16	1.41322196556275e-16
2008228	15	1.02025873197576e-16	1.38164174109485e-16
2008228	16	1.24068197468403e-16	1.88211369879581e-16
2008228	17	1.25374210663499e-16	1.91933784485212e-16
2008228	18	1.20346979020233e-16	1.80772501688045e-16
2008228	19	1.14375509608717e-16	1.6295621185411e-16
2008228	20	1.1082036745897e-16	1.50431722836288e-16
2008228	21	1.0702831013731e-16	1.40979082575191e-16
2008228	22	1.04619611894728e-16	1.35145664377221e-16
2008228	23	1.00841018903966e-16	1.26954341340903e-16
2008229	0	9.6692303655575e-17	1.2017627738718e-16
2008229	1	9.31337622036286e-17	1.15086651552994e-16
2008229	2	8.99663604150262e-17	1.11459935274743e-16
2008229	3	8.71934652110894e-17	1.09117070857867e-16
2008229	4	8.62271765360819e-17	1.07759085435614e-16
2008229	5	8.18273778773652e-17	1.06937530787194e-16
2008229	6	8.59760425894199e-17	1.14683585672132e-16
2008229	7	9.20792755094262e-17	1.22146075488327e-16
2008229	8	1.17084965539275e-16	1.8280055443426e-16
2008229	9	1.22603643242777e-16	1.80826874675951e-16
2008229	10	1.22473152960955e-16	1.75355602535061e-16
2008229	11	1.20566736175135e-16	1.70296575929909e-16
2008229	12	1.18330909322376e-16	1.64965527432373e-16
2008229	13	1.14757590940048e-16	1.58189174701644e-16
2008229	14	1.07322149398795e-16	1.46950066430578e-16
2008229	15	9.90527481691798e-17	1.33332581716767e-16
2008229	16	9.10085961780847e-17	1.2144755469248e-16
2008229	17	8.26177176253283e-17	1.09446640468315e-16
2008229	18	7.54821395152394e-17	9.85451729714967e-17
2008229	19	7.20394699835685e-17	9.14878790028426e-17
2008229	20	7.14220853278438e-17	8.8750660562196e-17
2008229	21	7.38866697863569e-17	9.00507530091499e-17
2008229	22	7.67907841064246e-17	9.2519461233756e-17
2008229	23	7.92143269109283e-17	9.48708761020678e-17
2008230	0	8.09867677600066e-17	9.76545252350667e-17
2008230	1	8.2359889960331e-17	1.00489214338664e-16
2008230	2	8.19631565987649e-17	1.02758882116226e-16
2008230	3	8.13704373921411e-17	1.05214106608957e-16
2008230	4	8.01374544730338e-17	1.08182398497951e-16
2008230	5	8.23676025980701e-17	1.14020866392293e-16
2008230	6	9.08093270458388e-17	1.23382876728217e-16
2008230	7	9.78811385404042e-17	1.29442165325948e-16
2008230	8	1.15323159475845e-16	1.81908390751668e-16
2008230	9	1.18375023143004e-16	1.81984837556105e-16
2008230	10	1.17388762643916e-16	1.74338177626604e-16
2008230	11	1.15731441255384e-16	1.67383956924761e-16
2008230	12	1.13490473850024e-16	1.59429127210851e-16
2008230	13	1.10397330522892e-16	1.51780954795678e-16
2008230	14	1.06735535913127e-16	1.43516657322441e-16
2008230	15	1.02500198082072e-16	1.35706773661488e-16
2008230	16	9.76954041323675e-17	1.28443234844723e-16
2008230	17	9.40541127094969e-17	1.23588507160283e-16
2008230	18	9.18674748540816e-17	1.19624025593531e-16
2008230	19	8.96937761560356e-17	1.13848313974307e-16
2008230	20	8.70103327822719e-17	1.07705089695149e-16
2008230	21	8.42532213773716e-17	1.03197150416694e-16
2008230	22	8.21904062336873e-17	1.00091064726373e-16
2008230	23	8.08514024829981e-17	9.79303361058946e-17
2008231	0	7.92024020533088e-17	9.61868906280198e-17
2008231	1	7.417412705916e-17	9.46107914532646e-17
2008231	2	7.67823828829696e-17	1.00584167979231e-16
2008231	3	7.17237319842565e-17	9.64805406171397e-17
2008231	4	7.12233469696927e-17	9.35011220660719e-17
2008231	5	7.25829899630536e-17	9.013144396219e-17
2008231	6	8.08195770351968e-17	9.97146757002548e-17
2008231	7	9.53764777012729e-17	1.21732831880343e-16
2008231	8	1.0592342433359e-16	1.4133936726727e-16
2008231	9	1.20442898720892e-16	1.72505126709986e-16
2008231	10	1.20600507414813e-16	1.62181025992242e-16
2008231	11	1.13620358367851e-16	1.50026512858692e-16
2008231	12	1.17177687749739e-16	1.68951499345851e-16
2008231	13	1.17510022707559e-16	1.70733520720786e-16
2008231	14	1.01071826346467e-16	1.34444204979249e-16
2008231	15	9.5183520946366e-17	1.21799306355804e-16
2008231	16	9.10720811626828e-17	1.14688199765435e-16
2008231	17	8.79905240228185e-17	1.08588480831417e-16
2008231	18	8.57507654947918e-17	1.01409824083323e-16
2008231	19	8.41732305822091e-17	9.52493985054554e-17
2008231	20	8.20827850934302e-17	9.00285255253864e-17
2008231	21	7.79293870852278e-17	8.43144952676496e-17
2008231	22	7.37285856460016e-17	7.95706460423204e-17
2008231	23	7.10972822109055e-17	7.63708146432159e-17
2008232	0	6.9279941452105e-17	7.40452949643166e-17
2008232	1	6.76800612030718e-17	7.20776462947906e-17
2008232	2	6.64852825662859e-17	7.05607270049637e-17
2008232	3	6.59243845918078e-17	6.98311852207266e-17
2008232	4	6.59014417083888e-17	6.9909906216428e-17
2008232	5	6.69527620667789e-17	7.09761060064033e-17
2008232	6	6.95331617211272e-17	7.42334657538063e-17
2008232	7	7.30812689655696e-17	7.84870472384591e-17
2008232	8	7.93108233203679e-17	8.93423397324873e-17
2008232	9	9.54557514317112e-17	1.14218850072258e-16
2008232	10	1.10005848246553e-16	1.38107276028555e-16
2008232	11	1.11020122481733e-16	1.37060673011393e-16
2008232	12	1.06792437309378e-16	1.27433586799406e-16
2008232	13	1.0083516500067e-16	1.17082633603397e-16
2008232	14	9.37433842607194e-17	1.08255472622744e-16
2008232	15	9.23098365763788e-17	1.06127700487426e-16
2008232	16	9.56246257798039e-17	1.09266588058637e-16
2008232	17	1.01422771297262e-16	1.15909331175134e-16
2008232	18	1.047054378536e-16	1.21996194271258e-16
2008232	19	1.138866025699e-16	1.43461379897697e-16
2008232	20	1.13190421677092e-16	1.45831817660377e-16
2008232	21	1.08656770172867e-16	1.37602904762204e-16
2008232	22	1.07082256998492e-16	1.34501589921672e-16
2008232	23	1.08004976293122e-16	1.38866270697927e-16
2008233	0	1.20351744417818e-16	1.68349599946191e-16
2008233	1	1.21476320186988e-16	1.68103461960891e-16
2008233	2	1.1720183982261e-16	1.47450026699993e-16
2008233	3	1.13075317130601e-16	1.33654443493151e-16
2008233	4	1.10488507844191e-16	1.24009606474041e-16
2008233	5	1.0784697510671e-16	1.18740237581481e-16
2008233	6	1.0518607855665e-16	1.18854903780134e-16
2008233	7	9.89413399364717e-17	1.24663560726887e-16
2008233	8	1.16787658030258e-16	1.70173454174566e-16
2008233	9	1.14021571135963e-16	1.69316764562994e-16
2008233	10	1.14212861355948e-16	1.68073535610459e-16
2008233	11	8.61108050177426e-17	1.21379209534672e-16
2008233	12	8.30916091992567e-17	1.11530555653611e-16
2008233	13	9.67055600790239e-17	1.27646397573319e-16
2008233	14	1.03894070377753e-16	1.34278908603745e-16
2008233	15	1.01137644980876e-16	1.28197867850815e-16
2008233	16	9.64702714024091e-17	1.2099771583315e-16
2008233	17	9.159450186556e-17	1.15183098303624e-16
2008233	18	9.05014367025603e-17	1.13519031839138e-16
2008233	19	9.63940265208977e-17	1.24151940846831e-16
2008233	20	1.14280152558674e-16	1.68075079715018e-16
2008233	21	1.13418961733767e-16	1.68813622714259e-16
2008233	22	9.80175519402981e-17	1.38671458817824e-16
2008233	23	9.25432982203572e-17	1.31329612758422e-16
2008234	0	9.22268695923301e-17	1.3162037582477e-16
2008234	1	9.32118020129316e-17	1.35029829005294e-16
2008234	2	1.11811411159342e-16	1.69830254894732e-16
2008234	3	1.14069026173605e-16	1.69763190615485e-16
2008234	4	1.03226757736552e-16	1.41840593036512e-16
2008234	5	1.17325741201758e-16	1.62162573999782e-16
2008234	6	1.12284455296744e-16	1.4013914096575e-16
2008234	7	1.08568941410401e-16	1.26632609488873e-16
2008234	8	1.02719913819486e-16	1.137080080098e-16
2008234	9	9.58322972784398e-17	1.04677206192043e-16
2008234	10	9.10167367108399e-17	1.00550504929951e-16
2008234	11	8.77722466433258e-17	9.84147330725613e-17
2008234	12	8.9253912982605e-17	1.02324786849904e-16
2008234	13	9.28235984999914e-17	1.09531081812086e-16
2008234	14	9.55504314101805e-17	1.14029930747193e-16
2008234	15	9.65225138425085e-17	1.1556257972796e-16
2008234	16	9.87561313554527e-17	1.18343271469017e-16
2008234	17	1.02110420277351e-16	1.21423178950704e-16
2008234	18	1.06819341669307e-16	1.28971721390378e-16
2008234	19	1.23718055958096e-16	1.74903693880417e-16
2008234	20	1.22013304118577e-16	1.76927088992366e-16
2008234	21	1.19216778547241e-16	1.75818322416492e-16
2008234	22	1.17124984223667e-16	1.73239640833347e-16
2008234	23	1.14363306055382e-16	1.71497364080359e-16
2008235	0	1.13096505349268e-16	1.69728453161473e-16
2008235	1	1.12559113461495e-16	1.69955257692848e-16
2008235	2	1.10889721764722e-16	1.71342052418896e-16
2008235	3	1.11272180753828e-16	1.72506320922747e-16
2008235	4	1.06699172481479e-16	1.53491752714215e-16
2008235	5	1.05300782862491e-16	1.47162647834267e-16
2008235	6	1.04827219262639e-16	1.4770793623404e-16
2008235	7	1.03455999113965e-16	1.43845447536095e-16
2008235	8	1.01480867028518e-16	1.32771911930255e-16
2008235	9	9.89507162680616e-17	1.17945979973876e-16
2008235	10	9.84432356475313e-17	1.16070459060896e-16
2008235	11	1.16044688259306e-16	1.62432317530693e-16
2008235	12	1.14317335946471e-16	1.58956395138095e-16
2008235	13	1.20658617504544e-16	1.70365936932056e-16
2008235	14	1.19175749285405e-16	1.69167854750516e-16
2008235	15	1.1713818843439e-16	1.69111209295961e-16
2008235	16	1.15038169387656e-16	1.69520156942768e-16
2008235	17	1.11333481360895e-16	1.70058321618767e-16
2008235	18	1.07703443077477e-16	1.70560997401953e-16
2008235	19	1.04682057021623e-16	1.70877124487585e-16
2008235	20	1.05098182914921e-16	1.72792296627183e-16
2008235	21	9.98837754479954e-17	1.63285682108222e-16
2008235	22	7.90379883150065e-17	1.28115983965624e-16
2008235	23	6.89098971877122e-17	1.12319198416612e-16
2008236	0	8.69612127266146e-17	1.40100770711338e-16
2008236	1	1.12281268571361e-16	1.71602590388969e-16
2008236	2	1.11572633763218e-16	1.70858605807447e-16
2008236	3	1.10265171323344e-16	1.70187263124187e-16
2008236	4	1.0651705819669e-16	1.74629631820881e-16
2008236	5	1.06486416684002e-16	1.78587406535717e-16
2008236	6	1.11998651282466e-16	1.77678752638817e-16
2008236	7	1.17128502796774e-16	1.73723750029999e-16
2008236	8	1.17040528211318e-16	1.67209283887236e-16
2008236	9	9.69087835134157e-17	1.38098658121637e-16
2008236	10	8.55707392351353e-17	1.23374396963322e-16
2008236	11	1.08449930097764e-16	1.58438039439245e-16
2008236	12	1.05685816369876e-16	1.56372899834837e-16
2008236	13	1.13163362233806e-16	1.67565794456529e-16
2008236	14	1.12747314904212e-16	1.67191839079244e-16
2008236	15	1.1562692825124e-16	1.67313314619368e-16
2008236	16	1.16800740927395e-16	1.67500449264948e-16
2008236	17	1.16929720025755e-16	1.67546924262475e-16
2008236	18	6.55195340928226e-17	8.57719132392565e-17
2008236	19	3.68594752766121e-17	4.53796637542262e-17
2008236	20	3.06864122592397e-17	3.67351541142556e-17
2008236	21	4.57867651445438e-17	5.93968157843344e-17
2008236	22	7.22928167436422e-17	1.0225021454274e-16
2008236	23	1.08844760631285e-16	1.69572645933226e-16
2008237	0	1.07783776431416e-16	1.69867123529118e-16
2008237	1	1.05434365258284e-16	1.70320249978729e-16
2008237	2	1.02853328454787e-16	1.71044585843338e-16
2008237	3	1.0020973054298e-16	1.72334391225672e-16
2008237	4	1.01232574170932e-16	1.73549486236125e-16
2008237	5	6.35168800520116e-17	1.00250416748789e-16
2008237	6	8.20701369103803e-17	1.19371989497701e-16
2008237	7	7.96483135837342e-17	1.08424171946895e-16
2008237	8	7.29360309663671e-17	9.51982053144943e-17
2008237	9	6.91551005947252e-17	9.04280806922928e-17
2008237	10	1.1593623699722e-16	1.70485769869241e-16
2008237	11	1.19438164428462e-16	1.70642275618284e-16
2008237	12	8.10731857928312e-17	1.08218541578344e-16
2008237	13	7.30588308899881e-17	9.39280317527522e-17
2008237	14	6.84586822149209e-17	8.6394677211037e-17
2008237	15	6.42576011461833e-17	8.11399631015521e-17
2008237	16	5.95623969508251e-17	7.54506003708065e-17
2008237	17	5.53081305397992e-17	7.0756499648539e-17
2008237	18	5.41112171473145e-17	6.82943830059369e-17
2008237	19	5.31516431787156e-17	6.55515140475027e-17
2008237	20	5.25039986849122e-17	6.33333506554914e-17
2008237	21	5.05004275630294e-17	6.13884093161759e-17
2008237	22	5.01398117644421e-17	6.1336641513789e-17
2008237	23	5.1858653794753e-17	6.19931041140649e-17
2008238	0	5.4404290337781e-17	6.26913224334681e-17
2008238	1	5.4517499457204e-17	6.29979136445026e-17
2008238	2	5.30110852666984e-17	6.31346841947192e-17
2008238	3	5.10482103426784e-17	6.29982189443724e-17
2008238	4	4.99805737384184e-17	6.29327935096456e-17
2008238	5	4.97688025026083e-17	6.31720192553874e-17
2008238	6	4.97660493612672e-17	6.32502284567305e-17
2008238	7	4.84272119835085e-17	6.33671007026176e-17
2008238	8	4.79749483200004e-17	6.33739687821263e-17
2008238	9	4.78364315493046e-17	6.29277102763917e-17
2008238	10	4.79923801053425e-17	6.15635026676972e-17
2008238	11	4.78974546779826e-17	5.93021448979977e-17
2008238	12	4.65642132019757e-17	5.66240924587543e-17
2008238	13	4.5117644329035e-17	5.42222935716379e-17
2008238	14	4.44758677032347e-17	5.39973062981216e-17
2008238	15	4.86051665223842e-17	5.99139300963148e-17
2008238	16	6.55547148535008e-17	8.60688134508201e-17
2008238	17	1.10528364165396e-16	1.71375938894359e-16
2008238	18	1.09026690555003e-16	1.70672802908908e-16
2008238	19	1.0800447131352e-16	1.70400865046215e-16
2008238	20	1.07637415606949e-16	1.71366922095823e-16
2008238	21	1.08451291449768e-16	1.72551021192403e-16
2008238	22	1.1187551920945e-16	1.74746093821475e-16
2008238	23	9.71141344134498e-17	1.35781602614692e-16
2008239	0	8.31566241676841e-17	1.08817306837175e-16
2008239	1	7.31745373473642e-17	9.207834312593e-17
2008239	2	6.74863030068686e-17	8.31481284467745e-17
2008239	3	6.46641991791313e-17	7.89848975448905e-17
2008239	4	6.30677478168519e-17	7.75932459453232e-17
2008239	5	6.33119071203249e-17	7.70169641337277e-17
2008239	6	6.37727536633992e-17	7.77184761511417e-17
2008239	7	6.64468198832279e-17	7.95662710912543e-17
2008239	8	6.89205869243914e-17	8.18131247348657e-17
2008239	9	7.15093937679007e-17	8.44555265541444e-17
2008239	10	9.17822009859377e-17	1.18442488990941e-16
2008239	11	1.29108309656338e-16	1.84629525137683e-16
2008239	12	1.25502841383046e-16	1.77849560982306e-16
2008239	13	1.22297457017736e-16	1.70639158384643e-16
2008239	14	1.17026036532923e-16	1.58232523715831e-16
2008239	15	1.05388553827902e-16	1.3873924011005e-16
2008239	16	9.71410306183398e-17	1.25319882677347e-16
2008239	17	9.15955645970361e-17	1.16071617913925e-16
2008239	18	8.68431529522804e-17	1.07958867065608e-16
2008239	19	8.29251136482506e-17	1.02936157251032e-16
2008239	20	7.87348040207974e-17	9.83896610449588e-17
2008239	21	7.54061390158645e-17	9.36776316641443e-17
2008239	22	7.2155709525238e-17	8.92143043321519e-17
2008239	23	6.8996569827557e-17	8.50547296207197e-17
2008240	0	6.61671640868226e-17	8.18314011411127e-17
2008240	1	6.37867906412499e-17	7.98126982141343e-17
2008240	2	6.21016497470925e-17	7.88248380014843e-17
2008240	3	6.11920450530429e-17	7.85071641561491e-17
2008240	4	6.01849576253481e-17	7.8704622706293e-17
2008240	5	6.09487433845894e-17	7.93279039218338e-17
2008240	6	6.25785762970717e-17	7.96419050838802e-17
2008240	7	6.56128091352124e-17	8.16021121944702e-17
2008240	8	7.24442709980668e-17	8.85566653969858e-17
2008240	9	7.50439344584441e-17	9.23437586511737e-17
2008240	10	7.20286914156411e-17	8.88772128343763e-17
2008240	11	6.86284140192758e-17	8.34574610130498e-17
2008240	12	6.46558716251318e-17	7.75364416743376e-17
2008240	13	6.12035782746214e-17	7.16944262327583e-17
2008240	14	5.59172299564634e-17	6.69018902163892e-17
2008240	15	5.3605473565407e-17	6.47109694117439e-17
2008240	16	5.22077261782179e-17	6.52039317854871e-17
2008240	17	5.40953780406934e-17	6.67512513871625e-17
2008240	18	5.59244978897834e-17	6.92278586137693e-17
2008240	19	5.88745724656164e-17	7.10946208695067e-17
2008240	20	5.97918892845365e-17	7.06955987761971e-17
2008240	21	5.85616666840026e-17	6.88150173398699e-17
2008240	22	5.67539432684868e-17	6.64745222929653e-17
2008240	23	5.42790604738823e-17	6.43450029447406e-17
2008241	0	5.27277104851929e-17	6.24854839677579e-17
2008241	1	5.11075778522412e-17	6.09859664812937e-17
2008241	2	4.97868410567959e-17	5.95165080991638e-17
2008241	3	4.83183117955058e-17	5.81184252818265e-17
2008241	4	4.66276573806847e-17	5.68736335487837e-17
2008241	5	4.50170722648778e-17	5.53573681395426e-17
2008241	6	4.36165679150504e-17	5.36536257442687e-17
2008241	7	4.24686006928563e-17	5.21443898036327e-17
2008241	8	4.23604828787005e-17	5.11446666342373e-17
2008241	9	4.3187124087968e-17	5.15172158710357e-17
2008241	10	4.41342642687891e-17	5.21352392416805e-17
2008241	11	4.60602324937408e-17	5.42983433114541e-17
2008241	12	4.84245196658402e-17	5.7344929574556e-17
2008241	13	4.98536280928771e-17	5.87870600824313e-17
2008241	14	5.17597406624101e-17	6.04000620689595e-17
2008241	15	5.1970967367895e-17	6.06411640010653e-17
2008241	16	5.25296354474071e-17	6.09160670587339e-17
2008241	17	5.11842416403948e-17	5.90078357577303e-17
2008241	18	4.68564531093939e-17	5.41327279106389e-17
2008241	19	4.0550094547905e-17	4.73792453679299e-17
2008241	20	3.46294847117522e-17	4.05274261749762e-17
2008241	21	2.76604975287064e-17	3.24364837407833e-17
2008241	22	2.16437007894657e-17	2.57956978864821e-17
2008241	23	1.6784488420665e-17	2.04281582696284e-17
2008242	0	1.26498634393784e-17	1.56651635462726e-17
2008242	1	8.95867329884333e-18	1.13865368512236e-17
2008242	2	9.25586012412138e-18	1.25045859647213e-17
2008242	3	2.29617970165763e-17	3.27859705262624e-17
2008242	4	5.0258259128142e-17	7.01985591250177e-17
2008242	5	1.18551045641718e-16	1.68864094813633e-16
2008242	6	1.21911433808747e-16	1.68949053433299e-16
2008242	7	1.23185694228615e-16	1.6788915148833e-16
2008242	8	1.23582988017341e-16	1.67615965866159e-16
2008242	9	1.23983642569614e-16	1.67437934573478e-16
2008242	10	1.02922803974429e-16	1.28463600147871e-16
2008242	11	8.51072702569649e-17	1.02479894023177e-16
2008242	12	7.06516075904488e-17	8.28627877126997e-17
2008242	13	5.86741881994042e-17	6.76350148191158e-17
2008242	14	5.03970381965933e-17	5.75872164628582e-17
2008242	15	4.73204969554952e-17	5.36550397087881e-17
2008242	16	4.80361620067209e-17	5.44545633589074e-17
2008242	17	5.11120250329861e-17	5.7833743592842e-17
2008242	18	5.48858515188054e-17	6.11194403133224e-17
2008242	19	5.84771890126596e-17	6.40452276015148e-17
2008242	20	6.03493034683827e-17	6.46492911264311e-17
2008242	21	6.04529534877567e-17	6.37070743577641e-17
2008242	22	5.9948803102473e-17	6.27908527816292e-17
2008242	23	5.93289949339894e-17	6.19353878226164e-17
2008243	0	5.86993250317717e-17	6.14300690697656e-17
2008243	1	5.86161748023401e-17	6.13759632519269e-17
2008243	2	5.84763348063639e-17	6.13538618735032e-17
2008243	3	5.7889341189245e-17	6.09978622238611e-17
2008243	4	5.7670591348197e-17	6.11665694558972e-17
2008243	5	5.78963449181557e-17	6.1800303285597e-17
2008243	6	5.68483895597947e-17	6.21044946999574e-17
2008243	7	6.88899059913774e-17	7.74578124031115e-17
2008243	8	8.40334379878581e-17	9.85318587789484e-17
2008243	9	9.72666950502653e-17	1.20055274397167e-16
2008243	10	1.04070444901482e-16	1.30870458258003e-16
2008243	11	1.06785249488392e-16	1.3581744163442e-16
2008243	12	1.05793216903058e-16	1.33691336117151e-16
2008243	13	1.05109873283406e-16	1.3259429807651e-16
2008243	14	1.03677923017786e-16	1.30503215298782e-16
2008243	15	1.0178415546986e-16	1.27770375848463e-16
2008243	16	1.00199632389241e-16	1.25253968724066e-16
2008243	17	9.84527975705367e-17	1.22799226000724e-16
2008243	18	9.72985062946943e-17	1.20960682273431e-16
2008243	19	9.64386512071663e-17	1.1698758681484e-16
2008243	20	9.6533773181094e-17	1.14860631243063e-16
2008243	21	9.77819319319357e-17	1.15915111938259e-16
2008243	22	1.00170389828117e-16	1.18965048565062e-16
2008243	23	1.02417310959532e-16	1.22173568871275e-16
