# Supplementary material for: A comparison of sea salt emission parameterizations in northwestern Europe using a chemistry transport model setup
Source: Copernicus journal article supplement (doi:10.5194/acp-16-9905-2016), 2016-08-08
Supplement: Supplementary file 2 [file acp-16-9905-2016-supplement.zip › conc/conc.timeseries.values.sum2008.zero.Na.DE0044R.csv]

doy	hour	pm2.5	pm10
2008183	0	8.81279532603293e-17	1.01179613005754e-16
2008183	1	8.79327130386765e-17	1.00775390966824e-16
2008183	2	8.68190316218726e-17	9.89977684698279e-17
2008183	3	8.51204487814096e-17	9.70969049620464e-17
2008183	4	8.13488875205834e-17	9.51741766541178e-17
2008183	5	7.98642616822891e-17	9.54397873934983e-17
2008183	6	8.06989509946471e-17	9.73407109492818e-17
2008183	7	8.05338465325009e-17	9.70638934531332e-17
2008183	8	8.2575554276425e-17	1.04293066811738e-16
2008183	9	8.36786685766702e-17	1.07471461873306e-16
2008183	10	7.77126491493368e-17	9.95907815134392e-17
2008183	11	7.34527468815619e-17	9.30218489122986e-17
2008183	12	6.87552947721949e-17	8.59005503062408e-17
2008183	13	6.39339282844827e-17	7.87453325340795e-17
2008183	14	5.9495670285557e-17	7.2478511365357e-17
2008183	15	5.59780526740905e-17	6.76585362789271e-17
2008183	16	5.29411273090072e-17	6.38136701066855e-17
2008183	17	5.12763624986885e-17	6.09116867747216e-17
2008183	18	5.07821494404596e-17	5.88802773402265e-17
2008183	19	5.1439489491934e-17	5.86803065925928e-17
2008183	20	5.37541029353728e-17	6.19868335172206e-17
2008183	21	5.80425704946415e-17	6.81600454782382e-17
2008183	22	6.35134361572218e-17	7.55639517184343e-17
2008183	23	6.87685927840805e-17	8.28572966231543e-17
2008184	0	7.21708267988697e-17	8.7498856080051e-17
2008184	1	7.31833038450824e-17	8.74556484721214e-17
2008184	2	7.16593893850218e-17	8.3666408074697e-17
2008184	3	6.90561303092673e-17	7.90524785322225e-17
2008184	4	6.61883131633973e-17	7.50510425887341e-17
2008184	5	6.35395227124865e-17	7.23444752020365e-17
2008184	6	6.27747811997218e-17	7.17440350145083e-17
2008184	7	6.22450179111143e-17	7.14125233665015e-17
2008184	8	6.25629710933916e-17	7.23985732577678e-17
2008184	9	6.76701706345518e-17	7.9244822766608e-17
2008184	10	6.7647513565245e-17	7.8753914237359e-17
2008184	11	6.43855208726011e-17	7.40650536641209e-17
2008184	12	6.03326845286567e-17	6.87609968606908e-17
2008184	13	5.73867156474351e-17	6.47942371086342e-17
2008184	14	5.42337131776484e-17	6.10112017838295e-17
2008184	15	5.11746992831521e-17	5.75704309508859e-17
2008184	16	4.90179275404135e-17	5.4960781299914e-17
2008184	17	4.67904813992887e-17	5.25584322799291e-17
2008184	18	4.41887171495009e-17	5.00160235024972e-17
2008184	19	4.29738493733623e-17	4.74484594044084e-17
2008184	20	4.20515501094302e-17	4.63974923132374e-17
2008184	21	4.26037881136957e-17	4.67778230450484e-17
2008184	22	4.44427971799388e-17	4.86379717297184e-17
2008184	23	4.60534002422732e-17	5.06120590232482e-17
2008185	0	4.72058401445989e-17	5.24424545447804e-17
2008185	1	4.85440111977329e-17	5.48654236012228e-17
2008185	2	4.96872021621337e-17	5.66759453418715e-17
2008185	3	5.09695454452241e-17	5.83907924879639e-17
2008185	4	5.30493153607385e-17	6.14121662800873e-17
2008185	5	5.83882714053685e-17	6.7599990184405e-17
2008185	6	6.39340384974557e-17	7.39347894679511e-17
2008185	7	6.67397491206478e-17	7.66315820037331e-17
2008185	8	6.92077884379115e-17	7.918243917e-17
2008185	9	7.31616916966465e-17	8.42242302730902e-17
2008185	10	7.8309045345436e-17	9.20387911689384e-17
2008185	11	7.5967817238603e-17	8.87564050554987e-17
2008185	12	7.34537948058582e-17	8.5321210906613e-17
2008185	13	7.15075950095515e-17	8.25349145722436e-17
2008185	14	6.97432661088946e-17	8.01179477146268e-17
2008185	15	6.78415052285854e-17	7.77582726555379e-17
2008185	16	6.62071444389979e-17	7.6495660924505e-17
2008185	17	6.54140433719517e-17	7.72663669589352e-17
2008185	18	6.52360199112207e-17	7.83651492327324e-17
2008185	19	6.61505653962198e-17	7.88534285552528e-17
2008185	20	7.10097862291052e-17	8.31494678694541e-17
2008185	21	7.41447233342341e-17	8.54122883000466e-17
2008185	22	7.41263308034943e-17	8.4929374720489e-17
2008185	23	7.34662825066823e-17	8.50714428271749e-17
2008186	0	7.24454154188667e-17	8.46270372798838e-17
2008186	1	7.01508191414542e-17	8.21907233476612e-17
2008186	2	6.65802004309329e-17	7.88767007428008e-17
2008186	3	6.43271961780266e-17	7.53471291969456e-17
2008186	4	6.39140851104771e-17	7.54749375960686e-17
2008186	5	6.04509504868902e-17	7.05822025239231e-17
2008186	6	5.03712694369483e-17	5.48864438154314e-17
2008186	7	4.15671241241774e-17	4.38131453618962e-17
2008186	8	3.76736040669269e-17	4.04104889410224e-17
2008186	9	3.51731357666167e-17	3.74615478978769e-17
2008186	10	3.29095818155687e-17	3.48915818554621e-17
2008186	11	3.18109344534386e-17	3.39134290036958e-17
2008186	12	3.10681144503696e-17	3.29147920587054e-17
2008186	13	2.99664163559003e-17	3.15320535932989e-17
2008186	14	2.8800912957634e-17	3.0060257111047e-17
2008186	15	2.83671299809633e-17	2.98039118824052e-17
2008186	16	2.90250501579465e-17	3.0351576363645e-17
2008186	17	2.97129557402583e-17	3.08131948676946e-17
2008186	18	3.06984131546151e-17	3.15597990654857e-17
2008186	19	3.13666032023554e-17	3.22351173332397e-17
2008186	20	3.15111458571028e-17	3.24740022842381e-17
2008186	21	3.14962630972797e-17	3.26978805058826e-17
2008186	22	3.17105551612304e-17	3.28920542402018e-17
2008186	23	3.27297995301367e-17	3.39375466870219e-17
2008187	0	3.46474075619002e-17	3.66216974456485e-17
2008187	1	3.95528632270784e-17	4.39386469374083e-17
2008187	2	4.60153517003041e-17	5.2777916258891e-17
2008187	3	5.44737328792069e-17	6.62139740361588e-17
2008187	4	6.60014812760692e-17	8.12686627162351e-17
2008187	5	7.14265076085629e-17	9.10003885368693e-17
2008187	6	1.19764651943098e-16	1.74269943266168e-16
2008187	7	1.20863479862478e-16	1.72828041853892e-16
2008187	8	1.21696726766182e-16	1.70799042335625e-16
2008187	9	1.24743940477235e-16	1.67999415834719e-16
2008187	10	1.19261267768144e-16	1.52647678016477e-16
2008187	11	1.14446888802972e-16	1.41734979703871e-16
2008187	12	1.09548386554662e-16	1.3191739687372e-16
2008187	13	1.05565261404911e-16	1.24912687330777e-16
2008187	14	1.03092146408801e-16	1.19942055913562e-16
2008187	15	1.01157055086041e-16	1.15854312427157e-16
2008187	16	9.89143789697406e-17	1.1303926002894e-16
2008187	17	9.75723692058163e-17	1.13670890082452e-16
2008187	18	9.82572447745679e-17	1.16105790511153e-16
2008187	19	9.87107811915736e-17	1.15268318490072e-16
2008187	20	9.64762648203959e-17	1.09278881593493e-16
2008187	21	9.35030464242759e-17	1.04451285930929e-16
2008187	22	8.94125679282809e-17	9.92027613106198e-17
2008187	23	8.48640261417379e-17	9.41632276531621e-17
2008188	0	8.23156437698945e-17	9.24739227016104e-17
2008188	1	8.34065502798644e-17	9.50468111721948e-17
2008188	2	8.22181254040999e-17	9.38686698747125e-17
2008188	3	8.18865155245955e-17	9.32186651795518e-17
2008188	4	7.95516985524266e-17	9.3939114116204e-17
2008188	5	8.30358514334988e-17	1.01178021628843e-16
2008188	6	8.49117094425973e-17	1.04688733649342e-16
2008188	7	8.2978421977582e-17	1.0326720514985e-16
2008188	8	7.75504656216481e-17	9.68360661103749e-17
2008188	9	7.16094275314169e-17	9.0275933893363e-17
2008188	10	6.82957870384214e-17	8.59582172826196e-17
2008188	11	6.63484817368389e-17	8.25795254155071e-17
2008188	12	6.50275367674838e-17	8.06512999390036e-17
2008188	13	7.06980374925388e-17	9.40479879986686e-17
2008188	14	7.81949965179913e-17	1.09275493875135e-16
2008188	15	8.45554838047721e-17	1.19448834596513e-16
2008188	16	9.87141852394335e-17	1.38683808656005e-16
2008188	17	1.12271910355073e-16	1.59056211201994e-16
2008188	18	1.1812888082101e-16	1.75743147342029e-16
2008188	19	1.20563697417253e-16	1.78639985089195e-16
2008188	20	1.20354341695385e-16	1.78357888562948e-16
2008188	21	1.19908575143335e-16	1.78918820681599e-16
2008188	22	1.14383428645466e-16	1.58856168951897e-16
2008188	23	1.09263345047179e-16	1.44666472743507e-16
2008189	0	1.06061297022489e-16	1.37981936672828e-16
2008189	1	1.02983235744237e-16	1.33234750860513e-16
2008189	2	9.90665599623457e-17	1.28650416308215e-16
2008189	3	9.6486247338892e-17	1.24907143328818e-16
2008189	4	8.9532868986431e-17	1.21471399238886e-16
2008189	5	1.16136461276786e-16	1.81036527139592e-16
2008189	6	1.19678731448663e-16	1.79077764627353e-16
2008189	7	1.20937105444253e-16	1.76281099531213e-16
2008189	8	1.24210940813767e-16	1.73579537683048e-16
2008189	9	1.23181913161887e-16	1.62732171997616e-16
2008189	10	1.22639024873005e-16	1.58099191028012e-16
2008189	11	1.16177723493493e-16	1.60953865873373e-16
2008189	12	1.17315477701784e-16	1.61992489862979e-16
2008189	13	1.2198547339711e-16	1.56956936408814e-16
2008189	14	1.20514290296027e-16	1.49186548552616e-16
2008189	15	1.1806035498302e-16	1.40343984915028e-16
2008189	16	1.15933483370084e-16	1.34398610428325e-16
2008189	17	1.1725014192515e-16	1.3780754041361e-16
2008189	18	1.18557797693113e-16	1.40329937566484e-16
2008189	19	1.17403824070922e-16	1.36432445681509e-16
2008189	20	1.14415285225145e-16	1.31224119961613e-16
2008189	21	1.14481023035326e-16	1.33370383965394e-16
2008189	22	1.16417675128232e-16	1.39356458702495e-16
2008189	23	1.22717229923149e-16	1.5038299312473e-16
2008190	0	1.2078518674285e-16	1.49984593301624e-16
2008190	1	1.27537443035098e-16	1.73585997557591e-16
2008190	2	1.20637877280098e-16	1.69662137210068e-16
2008190	3	1.18033331532717e-16	1.69378447943977e-16
2008190	4	1.17543322040486e-16	1.69724188198181e-16
2008190	5	1.14712664433027e-16	1.67680441334557e-16
2008190	6	1.13797416777801e-16	1.67824654908919e-16
2008190	7	1.00467314327119e-16	1.46696244677278e-16
2008190	8	9.39754161753276e-17	1.36938186661913e-16
2008190	9	1.04426170901661e-16	1.50285301604803e-16
2008190	10	1.15511883072232e-16	1.55511226359013e-16
2008190	11	1.08075484975756e-16	1.40299831896195e-16
2008190	12	9.93405796187481e-17	1.26662477411637e-16
2008190	13	9.23118562412289e-17	1.15606223881681e-16
2008190	14	9.39719876250376e-17	1.19722753900561e-16
2008190	15	1.01384349076779e-16	1.42449823478601e-16
2008190	16	1.12543792894024e-16	1.56134262180383e-16
2008190	17	8.99751334399054e-17	1.25699756113807e-16
2008190	18	1.01193584541547e-16	1.45767460756336e-16
2008190	19	9.9576951755378e-17	1.44303697087233e-16
2008190	20	1.10573261347651e-16	1.58516614310854e-16
2008190	21	1.15836793560156e-16	1.60416585308212e-16
2008190	22	1.20879082755887e-16	1.56663673988915e-16
2008190	23	1.15118307679679e-16	1.45357689302338e-16
2008191	0	1.18790432909065e-16	1.72375718411621e-16
2008191	1	1.19595951388031e-16	1.69554879150398e-16
2008191	2	1.19651650747475e-16	1.54034845306869e-16
2008191	3	1.20520427583246e-16	1.50727196217113e-16
2008191	4	1.21967219265975e-16	1.51003834397255e-16
2008191	5	1.21924037720494e-16	1.5161818886071e-16
2008191	6	1.16735134895702e-16	1.43845537594263e-16
2008191	7	1.14493352172068e-16	1.39412362313101e-16
2008191	8	1.16414927635259e-16	1.40310729045639e-16
2008191	9	1.18397404640037e-16	1.45422816586947e-16
2008191	10	1.19510117268351e-16	1.46931446236666e-16
2008191	11	1.18661588695347e-16	1.44125041085416e-16
2008191	12	1.16140741454202e-16	1.37686961895868e-16
2008191	13	1.11555024315575e-16	1.3016070245011e-16
2008191	14	1.05683755192069e-16	1.21155970039108e-16
2008191	15	1.01019877853453e-16	1.14175489540562e-16
2008191	16	9.6403500031344e-17	1.08606347620076e-16
2008191	17	9.25147750959702e-17	1.04644854407698e-16
2008191	18	9.0119613015992e-17	1.0080983799496e-16
2008191	19	8.67870981650137e-17	9.48755777886522e-17
2008191	20	7.80535020005292e-17	8.42868117635108e-17
2008191	21	8.78954528196483e-17	1.03467646953555e-16
2008191	22	1.07657571801005e-16	1.3385128468731e-16
2008191	23	9.44432026198621e-17	1.15637124197194e-16
2008192	0	9.21534036923894e-17	1.20139497387752e-16
2008192	1	5.58544140242846e-17	6.51990983433095e-17
2008192	2	4.5867189428393e-17	5.20155892037037e-17
2008192	3	4.2659813194717e-17	4.82965129337109e-17
2008192	4	4.641489805608e-17	5.3433185913088e-17
2008192	5	5.44590588480539e-17	6.50128334545185e-17
2008192	6	6.08786139408144e-17	7.06859127971006e-17
2008192	7	6.05663959549149e-17	7.10019570200838e-17
2008192	8	5.78826103810839e-17	6.68202535822459e-17
2008192	9	5.80903170117719e-17	6.5621860279358e-17
2008192	10	6.23573858252452e-17	6.80435123395604e-17
2008192	11	6.90722021478318e-17	7.60453063866379e-17
2008192	12	1.29197710098756e-16	1.81994465364658e-16
2008192	13	1.26830397833972e-16	1.81474744433791e-16
2008192	14	1.21122729197671e-16	1.66076370103213e-16
2008192	15	1.11817338032466e-16	1.43736354199483e-16
2008192	16	1.05156490448292e-16	1.31005956623737e-16
2008192	17	9.92617890655576e-17	1.23810206441334e-16
2008192	18	9.53735712727745e-17	1.19512070566026e-16
2008192	19	9.2953929982055e-17	1.15413874807125e-16
2008192	20	9.04880400508227e-17	1.10102790086043e-16
2008192	21	8.89117579373717e-17	1.05836959542092e-16
2008192	22	8.81450718363957e-17	1.03297407528399e-16
2008192	23	8.74194056918854e-17	1.01742774552941e-16
2008193	0	8.60015389732213e-17	9.89066401955438e-17
2008193	1	8.38754538978371e-17	9.48119925808804e-17
2008193	2	8.44625248130427e-17	9.3928813008039e-17
2008193	3	8.60114305280014e-17	9.252833263086e-17
2008193	4	8.61174652486799e-17	9.09592607824132e-17
2008193	5	8.29838432767224e-17	8.79631037016568e-17
2008193	6	8.08989338998731e-17	8.55404259599486e-17
2008193	7	7.7347484854023e-17	8.15781888307537e-17
2008193	8	7.47282382513351e-17	7.86480999991953e-17
2008193	9	7.49784324297096e-17	7.94425770172362e-17
2008193	10	7.89875624746076e-17	8.6557920411198e-17
2008193	11	8.78367252148318e-17	1.02728390833869e-16
2008193	12	1.22526283368376e-16	1.66189672982784e-16
2008193	13	1.16476699345266e-16	1.58710766045184e-16
2008193	14	1.30469333237196e-16	1.79043465052135e-16
2008193	15	1.29649006848972e-16	1.72823930771129e-16
2008193	16	1.26866498648853e-16	1.68770038971296e-16
2008193	17	1.2169783744964e-16	1.63846664569004e-16
2008193	18	1.15501120165805e-16	1.57388696188829e-16
2008193	19	1.07280674661616e-16	1.46021358877546e-16
2008193	20	1.04067707193213e-16	1.640153795268e-16
2008193	21	4.71731691930455e-17	7.56884408200172e-17
2008193	22	1.19854751954028e-19	1.86930335970917e-19
2008193	23	6.18394019427638e-17	9.58038382766128e-17
2008194	0	1.10260846260779e-16	1.67519315884307e-16
2008194	1	1.2087944513063e-16	1.79890825764147e-16
2008194	2	1.21599495858031e-16	1.80460068113746e-16
2008194	3	1.08280334032415e-16	1.49247521972777e-16
2008194	4	9.95083071814026e-17	1.26593834057126e-16
2008194	5	9.0996470817136e-17	1.12460814552641e-16
2008194	6	8.6260897424654e-17	1.08363112479976e-16
2008194	7	8.58503022927204e-17	1.11700148960041e-16
2008194	8	1.16470116019486e-16	1.72432912043062e-16
2008194	9	1.17591705353023e-16	1.72433150484892e-16
2008194	10	1.21547062370205e-16	1.7219560424368e-16
2008194	11	1.20744592006446e-16	1.5415205058293e-16
2008194	12	1.16808079384063e-16	1.39501338633562e-16
2008194	13	1.13269253660269e-16	1.31874104026651e-16
2008194	14	1.09313589512027e-16	1.25067749229539e-16
2008194	15	1.06162657481169e-16	1.19649485657926e-16
2008194	16	1.03041981170284e-16	1.14310561394652e-16
2008194	17	1.00856024015752e-16	1.10348064228281e-16
2008194	18	9.66992617980756e-17	1.05833203872116e-16
2008194	19	9.27996653590629e-17	1.01569572702548e-16
2008194	20	9.02254238940269e-17	9.83395684117289e-17
2008194	21	8.89548071974382e-17	9.6876198144778e-17
2008194	22	8.91975563379404e-17	9.73347981861623e-17
2008194	23	8.91837064737563e-17	1.00349598980943e-16
2008195	0	9.02820300519162e-17	1.0664914046774e-16
2008195	1	9.06639109543727e-17	1.10841474072923e-16
2008195	2	9.02624191894242e-17	1.13286018098222e-16
2008195	3	9.13313964883378e-17	1.12850525688577e-16
2008195	4	8.93839084229833e-17	1.10804374148458e-16
2008195	5	8.7627570553457e-17	1.13685026657183e-16
2008195	6	9.14367344574024e-17	1.22411329312689e-16
2008195	7	1.14832733663775e-16	1.80542944219108e-16
2008195	8	1.16231945526764e-16	1.81385848962181e-16
2008195	9	1.17232304801227e-16	1.8155771559562e-16
2008195	10	1.07051859680099e-16	1.64962913559607e-16
2008195	11	9.02304977689827e-17	1.3947168868909e-16
2008195	12	9.91306685401466e-17	1.53515563738745e-16
2008195	13	1.06593590988246e-16	1.66518835680316e-16
2008195	14	1.06565215393188e-16	1.6805649371464e-16
2008195	15	1.00621617683372e-16	1.64203833804901e-16
2008195	16	9.47002396483678e-17	1.5608685294019e-16
2008195	17	9.67670271193445e-17	1.62776967364696e-16
2008195	18	1.01880087304019e-16	1.71483672730592e-16
2008195	19	9.9965109605779e-17	1.67034914325087e-16
2008195	20	1.08132479886052e-16	1.77724824609782e-16
2008195	21	1.15534473230481e-16	1.83410268778956e-16
2008195	22	1.21318444966537e-16	1.83879702738268e-16
2008195	23	9.52630480299911e-17	1.28858100683585e-16
2008196	0	8.43467571152842e-17	1.09652994768711e-16
2008196	1	7.89932388338742e-17	1.00350838551083e-16
2008196	2	7.51048929718721e-17	9.51232009461602e-17
2008196	3	7.21720112174548e-17	9.15089175471291e-17
2008196	4	6.88017994237286e-17	8.86247946778837e-17
2008196	5	6.77966061810396e-17	8.8464253907131e-17
2008196	6	6.86708767716023e-17	8.64850505395597e-17
2008196	7	6.78781072273768e-17	8.24564533147995e-17
2008196	8	8.28226363346079e-17	1.05557745908517e-16
2008196	9	9.32047224004017e-17	1.20546659098687e-16
2008196	10	9.47061650284157e-17	1.21042750167495e-16
2008196	11	9.35731282096148e-17	1.18045244757325e-16
2008196	12	9.25271769468766e-17	1.15209443656876e-16
2008196	13	9.2530655404425e-17	1.13258497793461e-16
2008196	14	9.43772152134319e-17	1.1332138438641e-16
2008196	15	9.68093758064944e-17	1.14259782945173e-16
2008196	16	9.79124084801549e-17	1.14344649935303e-16
2008196	17	9.71696210187792e-17	1.12577879462253e-16
2008196	18	9.47705752103365e-17	1.07449511107661e-16
2008196	19	9.23471150221175e-17	1.01848277261355e-16
2008196	20	8.91191869817558e-17	9.71958944933439e-17
2008196	21	8.48618698063022e-17	9.32028340260707e-17
2008196	22	8.12787325253244e-17	9.01613046311639e-17
2008196	23	7.72390764164041e-17	8.6903025713427e-17
2008197	0	7.2687015487766e-17	8.370728729628e-17
2008197	1	6.79407035571597e-17	8.12191410476248e-17
2008197	2	6.37783567514406e-17	7.77563310225036e-17
2008197	3	5.78372815426501e-17	7.27645764910454e-17
2008197	4	5.54803456794662e-17	6.90014141443172e-17
2008197	5	5.32374846691079e-17	6.46363115836972e-17
2008197	6	4.85993428130993e-17	5.69013120746852e-17
2008197	7	4.59400930769059e-17	5.1197192161894e-17
2008197	8	4.48866608228178e-17	5.27369177495113e-17
2008197	9	4.61147673386327e-17	5.45387212673217e-17
2008197	10	4.89793428484533e-17	5.74857624455302e-17
2008197	11	4.81783005074592e-17	5.60744520015286e-17
2008197	12	4.20497412486062e-17	4.84796831848394e-17
2008197	13	3.43015596764451e-17	3.8939578859404e-17
2008197	14	2.635729741059e-17	2.96217577532297e-17
2008197	15	2.02323367921674e-17	2.28422525997279e-17
2008197	16	1.66989203548397e-17	1.91455998779627e-17
2008197	17	1.54225373526132e-17	1.7963376103524e-17
2008197	18	1.58356332255953e-17	1.82432125859083e-17
2008197	19	1.6899922434415e-17	1.90411910875579e-17
2008197	20	1.81366453661328e-17	2.03726294875311e-17
2008197	21	2.0049525685748e-17	2.27071944417905e-17
2008197	22	2.30270903151886e-17	2.63461040601772e-17
2008197	23	2.71633134439044e-17	3.16113235411136e-17
2008198	0	3.3311121540189e-17	3.95475303288812e-17
2008198	1	3.9677550884378e-17	4.72509153426631e-17
2008198	2	4.56377111834064e-17	5.38738563336548e-17
2008198	3	5.18590179243442e-17	6.17576783482593e-17
2008198	4	6.32696134053324e-17	8.04009131879674e-17
2008198	5	8.38856630794512e-17	1.20836473500452e-16
2008198	6	1.06646658857859e-16	1.64339125451952e-16
2008198	7	1.06253056655725e-16	1.6905388571602e-16
2008198	8	1.03993719659158e-16	1.40723857783713e-16
2008198	9	1.07927166992197e-16	1.40557680338674e-16
2008198	10	1.14394708645124e-16	1.62761995921136e-16
2008198	11	1.0063535646937e-16	1.42442455792878e-16
2008198	12	1.27170961620504e-16	1.72711353668851e-16
2008198	13	1.21898250954481e-16	1.68086285592271e-16
2008198	14	9.27857108055501e-17	1.30135021362159e-16
2008198	15	6.68043564722682e-17	9.48787575751876e-17
2008198	16	9.3551804193533e-17	1.34034730762678e-16
2008198	17	1.1767238267555e-16	1.70204347132332e-16
2008198	18	1.16774408613156e-16	1.70090602052272e-16
2008198	19	1.16110031341446e-16	1.70280941314656e-16
2008198	20	1.14890735384498e-16	1.70564593894539e-16
2008198	21	1.13659981199298e-16	1.71708324105691e-16
2008198	22	1.13528430375514e-16	1.73047441351053e-16
2008198	23	1.12086641472171e-16	1.73304227555194e-16
2008199	0	1.0970233809187e-16	1.72712023995923e-16
2008199	1	1.08049728791494e-16	1.71383684821255e-16
2008199	2	1.06675801826632e-16	1.71423801827187e-16
2008199	3	1.06024436416827e-16	1.71643829361525e-16
2008199	4	1.06720949487601e-16	1.72921619303742e-16
2008199	5	1.09751653049539e-16	1.71962286294753e-16
2008199	6	1.15177016055901e-16	1.70300033679121e-16
2008199	7	1.1448349056784e-16	1.56689236231342e-16
2008199	8	1.17408605947853e-16	1.53013290261317e-16
2008199	9	1.16993637609757e-16	1.47621606006069e-16
2008199	10	1.14103937422623e-16	1.41725383921868e-16
2008199	11	1.09537537150034e-16	1.34591505174533e-16
2008199	12	1.02697128423069e-16	1.24513899986582e-16
2008199	13	9.48602266791539e-17	1.140713553661e-16
2008199	14	8.56439521299939e-17	1.01352748497746e-16
2008199	15	7.54850552500611e-17	8.83208583883358e-17
2008199	16	6.64996480162627e-17	7.6993242138156e-17
2008199	17	5.92870281389181e-17	6.80931848881963e-17
2008199	18	5.35268793788139e-17	6.08422680859098e-17
2008199	19	4.89919559451091e-17	5.50267700341388e-17
2008199	20	4.49524326220872e-17	5.09838389505285e-17
2008199	21	4.17375866725658e-17	4.76802090497266e-17
2008199	22	4.21536105334127e-17	4.92593286183031e-17
2008199	23	4.22669133560395e-17	5.18721494225339e-17
2008200	0	3.97600631629499e-17	5.11100281238321e-17
2008200	1	3.66771608904447e-17	4.8040907863507e-17
2008200	2	3.31438785716346e-17	4.4109028137387e-17
2008200	3	3.00347990566784e-17	4.03446513650111e-17
2008200	4	2.76130064693114e-17	3.71843615207527e-17
2008200	5	2.51395858741692e-17	3.41705953560267e-17
2008200	6	2.45537230545049e-17	3.35655186491638e-17
2008200	7	1.15372452619897e-16	1.84933795293058e-16
2008200	8	1.21057818452278e-16	1.8474527984262e-16
2008200	9	8.29762438756367e-17	1.21942338681256e-16
2008200	10	6.18508890962314e-17	8.72421280061209e-17
2008200	11	4.83537923300438e-17	6.43489361702598e-17
2008200	12	3.67509187418562e-17	4.68188423285053e-17
2008200	13	2.93491439211439e-17	3.60357343132387e-17
2008200	14	2.50541451833435e-17	3.03524544020108e-17
2008200	15	2.23290729656123e-17	2.7412381946765e-17
2008200	16	2.11325701148647e-17	2.61553035422719e-17
2008200	17	2.06068862431984e-17	2.54846854584875e-17
2008200	18	2.01901762606474e-17	2.5047279516219e-17
2008200	19	2.05673599940687e-17	2.50650872302338e-17
2008200	20	2.11092874057817e-17	2.55877696314327e-17
2008200	21	2.17332559674766e-17	2.62924503209154e-17
2008200	22	2.26317844053589e-17	2.71574514436013e-17
2008200	23	1.18961034592138e-16	1.79274751935987e-16
2008201	0	1.20269743751605e-16	1.80102343739168e-16
2008201	1	1.20349908882103e-16	1.81691791298993e-16
2008201	2	7.99701865987821e-17	1.16346195253473e-16
2008201	3	7.94139517285054e-17	1.12190063855009e-16
2008201	4	7.91362780313689e-17	1.09600098116229e-16
2008201	5	8.09529732117297e-17	1.1333576229062e-16
2008201	6	9.30947659415311e-17	1.28914849202929e-16
2008201	7	1.03789534657181e-16	1.44026832623995e-16
2008201	8	1.07443704984683e-16	1.50409448619305e-16
2008201	9	1.24699859037699e-16	1.83201623413866e-16
2008201	10	1.23737197925544e-16	1.77088425644621e-16
2008201	11	1.2241928137306e-16	1.70330307984024e-16
2008201	12	1.21312033552761e-16	1.55454052442207e-16
2008201	13	1.17092610062473e-16	1.44279483230039e-16
2008201	14	1.16136885092998e-16	1.40756152646686e-16
2008201	15	1.17356070428915e-16	1.43445369401734e-16
2008201	16	1.20417237640562e-16	1.46226846659446e-16
2008201	17	1.19016456424484e-16	1.39539899737056e-16
2008201	18	1.16243255603268e-16	1.34716589974034e-16
2008201	19	1.13633746778616e-16	1.32059209080032e-16
2008201	20	1.17304404476642e-16	1.62446205816836e-16
2008201	21	1.20474916518939e-16	1.6885173201828e-16
2008201	22	1.20595756107799e-16	1.68156809705886e-16
2008201	23	1.2024898901255e-16	1.68065655164637e-16
2008202	0	1.20512874462734e-16	1.67998849810373e-16
2008202	1	1.21668028534144e-16	1.6750438032394e-16
2008202	2	1.2428642061966e-16	1.70673358378925e-16
2008202	3	1.21816075610178e-16	1.69437871205499e-16
2008202	4	1.1166382047197e-16	1.57228232229375e-16
2008202	5	1.20204548205805e-16	1.68495399190826e-16
2008202	6	1.15417747002424e-16	1.50530756346399e-16
2008202	7	1.06258183156487e-16	1.3651978398282e-16
2008202	8	1.03578875533226e-16	1.32029958301353e-16
2008202	9	1.07396114340808e-16	1.3495283346943e-16
2008202	10	1.0884410857904e-16	1.35210938023207e-16
2008202	11	1.05704822623579e-16	1.29551361375474e-16
2008202	12	1.01221364779858e-16	1.22465877577339e-16
2008202	13	9.775482271066e-17	1.16029415141857e-16
2008202	14	9.6798658390569e-17	1.12688072685667e-16
2008202	15	9.76392356600042e-17	1.12766831103087e-16
2008202	16	9.65127112691281e-17	1.11481306080324e-16
2008202	17	9.70141126811865e-17	1.1750466290833e-16
2008202	18	9.78520990977661e-17	1.18722743081992e-16
2008202	19	9.44421861321906e-17	1.07222291592907e-16
2008202	20	9.30117611915373e-17	1.01549227108468e-16
2008202	21	9.86991698449163e-17	1.13281946144584e-16
2008202	22	1.01154148567761e-16	1.18110810657354e-16
2008202	23	9.67166789947097e-17	1.11836033756708e-16
2008203	0	9.50532394904169e-17	1.073747652662e-16
2008203	1	9.3919318870357e-17	1.0531985264274e-16
2008203	2	9.21965339769447e-17	1.03731663608719e-16
2008203	3	9.09751410016983e-17	1.02140258965274e-16
2008203	4	9.05491990418166e-17	9.99328947619632e-17
2008203	5	8.96649781292929e-17	9.69962393784063e-17
2008203	6	8.69159652411162e-17	9.30157451030456e-17
2008203	7	8.08107946054745e-17	8.6937649655087e-17
2008203	8	7.33763348912285e-17	7.90389664486047e-17
2008203	9	6.5692586680386e-17	7.3226778902738e-17
2008203	10	6.22273304928968e-17	6.97158502096327e-17
2008203	11	5.81968676675531e-17	6.55210148320016e-17
2008203	12	4.71697172343556e-17	5.23917358128519e-17
2008203	13	3.29741076749439e-17	3.58014965022435e-17
2008203	14	3.04456615168096e-17	3.37679745043196e-17
2008203	15	3.34419510078981e-17	3.9262716183641e-17
2008203	16	3.22917502776681e-17	3.80994707478139e-17
2008203	17	2.01264729635832e-17	2.16928287381611e-17
2008203	18	1.72613922414889e-17	1.92935456199052e-17
2008203	19	2.83570026474195e-17	3.55278022375036e-17
2008203	20	1.16608078489549e-16	1.67589679652998e-16
2008203	21	8.91472794785448e-17	1.17118255600301e-16
2008203	22	7.47052714532128e-17	9.34419183833644e-17
2008203	23	5.64765222801754e-17	6.67344878197419e-17
2008204	0	4.16972045657144e-17	4.40375407460033e-17
2008204	1	4.54711883271317e-17	5.89996587880566e-17
2008204	2	6.08897980254494e-17	9.58723422156967e-17
2008204	3	9.24288555942752e-17	1.69343693892397e-16
2008204	4	9.13795529697349e-17	1.69512022109243e-16
2008204	5	9.14217907447327e-17	1.69543432914945e-16
2008204	6	9.37139207114673e-17	1.70068587265166e-16
2008204	7	9.07662455778943e-17	1.6290593901795e-16
2008204	8	9.96723828360972e-17	1.65054301649931e-16
2008204	9	1.05311791264328e-16	1.63320957987836e-16
2008204	10	1.04482039480528e-16	1.5922931986884e-16
2008204	11	1.03516477837911e-16	1.56986695460693e-16
2008204	12	1.06868688006088e-16	1.60238296014559e-16
2008204	13	1.15144110211518e-16	1.68862148467542e-16
2008204	14	1.16394912399928e-16	1.68590420072519e-16
2008204	15	1.15102720967436e-16	1.60143363805987e-16
2008204	16	1.04907417766799e-16	1.37767243274129e-16
2008204	17	9.90384837705754e-17	1.25712874584238e-16
2008204	18	1.10662601270395e-16	1.49370089565177e-16
2008204	19	1.03889152169519e-16	1.25188096953344e-16
2008204	20	9.87840022978494e-17	1.15012734725699e-16
2008204	21	9.67014405128189e-17	1.13912887655868e-16
2008204	22	8.95335400169883e-17	1.07031094578252e-16
2008204	23	8.28713899344654e-17	9.76404788555957e-17
2008205	0	7.91735357877214e-17	9.20058939045683e-17
2008205	1	7.69874406483334e-17	8.90365326399409e-17
2008205	2	7.66659246825059e-17	8.80264374368467e-17
2008205	3	7.78603884931237e-17	8.87217855282278e-17
2008205	4	7.93085362464591e-17	9.04166896436478e-17
2008205	5	8.18074734083739e-17	9.28658810177357e-17
2008205	6	8.35780166962361e-17	9.53638366298981e-17
2008205	7	8.59120076905102e-17	9.7597879165487e-17
2008205	8	8.53541525501783e-17	9.93766420119496e-17
2008205	9	1.23828251101447e-16	1.82215280347078e-16
2008205	10	1.23528542078576e-16	1.83493561133202e-16
2008205	11	1.19707123998596e-16	1.73061184666802e-16
2008205	12	1.12837922454514e-16	1.58577274398563e-16
2008205	13	1.06271025038563e-16	1.44454770604043e-16
2008205	14	1.00596792145442e-16	1.32333069893206e-16
2008205	15	9.61241251264539e-17	1.22288207194024e-16
2008205	16	9.31382350133928e-17	1.17932128471087e-16
2008205	17	9.31324299053822e-17	1.19848019687824e-16
2008205	18	9.3302294641827e-17	1.18048107034334e-16
2008205	19	9.24592773744564e-17	1.13207732143767e-16
2008205	20	9.33244483194612e-17	1.11293448445301e-16
2008205	21	9.43503646946489e-17	1.09915773698867e-16
2008205	22	9.53907779349874e-17	1.06737716817412e-16
2008205	23	9.28842789158396e-17	1.00731547498346e-16
2008206	0	8.90496314622786e-17	9.68897392967915e-17
2008206	1	8.60426914405158e-17	9.49124855736286e-17
2008206	2	8.29002914294913e-17	9.46599563422271e-17
2008206	3	8.03018479325342e-17	9.64819997359597e-17
2008206	4	8.14340088515701e-17	9.99215192362269e-17
2008206	5	8.73620488078955e-17	1.06102794489511e-16
2008206	6	9.31365226429914e-17	1.08820601897654e-16
2008206	7	9.38845763941553e-17	1.07165676230953e-16
2008206	8	9.05657703222346e-17	1.01744225145289e-16
2008206	9	8.77728397436594e-17	9.89401349939757e-17
2008206	10	8.65047137494835e-17	9.73600032104749e-17
2008206	11	8.5586197461842e-17	9.60160910103067e-17
2008206	12	8.40439109455135e-17	9.35504863267645e-17
2008206	13	8.2447180454672e-17	9.10099129356558e-17
2008206	14	8.0793311073226e-17	8.8362815520962e-17
2008206	15	7.94406809172408e-17	8.56710296200202e-17
2008206	16	7.77822552587929e-17	8.30538725843269e-17
2008206	17	7.62637692339561e-17	8.01596964171734e-17
2008206	18	7.52415019105497e-17	7.81553380560991e-17
2008206	19	7.41224183407884e-17	7.70391236997936e-17
2008206	20	7.38443333312232e-17	7.67356754856238e-17
2008206	21	7.39247854458956e-17	7.66270186800423e-17
2008206	22	7.44259078180837e-17	7.72681257857458e-17
2008206	23	7.67370316126911e-17	8.07117527348538e-17
2008207	0	8.15873984262187e-17	8.79554787704694e-17
2008207	1	8.83017756957143e-17	9.86999651626983e-17
2008207	2	1.01248639527519e-16	1.21455327382169e-16
2008207	3	1.13453244991083e-16	1.56899588614244e-16
2008207	4	1.0863563240248e-16	1.38998519123848e-16
2008207	5	1.13606250794874e-16	1.45998509549563e-16
2008207	6	1.19460169825056e-16	1.66154682496482e-16
2008207	7	1.1996309516626e-16	1.62754528132716e-16
2008207	8	1.04719867789733e-16	1.19402573032717e-16
2008207	9	8.98673401800716e-17	9.56048273354201e-17
2008207	10	7.77942525467015e-17	8.114248479423e-17
2008207	11	6.96520445131705e-17	7.27184808354585e-17
2008207	12	6.80871337033168e-17	7.16951404879838e-17
2008207	13	7.03157126695362e-17	7.48628265507804e-17
2008207	14	7.44325690064045e-17	8.00755238415484e-17
2008207	15	7.79711161917976e-17	8.46284130625277e-17
2008207	16	7.95185371940846e-17	8.66333165779861e-17
2008207	17	7.85615841184368e-17	8.49756213598865e-17
2008207	18	7.60999070274292e-17	8.10931993303659e-17
2008207	19	7.4968233676257e-17	7.93526886688214e-17
2008207	20	7.52698402647432e-17	7.93752894818441e-17
2008207	21	7.48333728336138e-17	7.83993898199676e-17
2008207	22	7.39516086981406e-17	7.75911133563818e-17
2008207	23	7.58148929907841e-17	8.00789529946789e-17
2008208	0	7.91869357952169e-17	8.39559244212825e-17
2008208	1	8.15488365040233e-17	8.67138841421237e-17
2008208	2	8.27613962286945e-17	8.84085337634899e-17
2008208	3	8.32947083871039e-17	8.94329497127745e-17
2008208	4	8.41750460425286e-17	9.04684950922491e-17
2008208	5	8.6217180195996e-17	9.21909122440223e-17
2008208	6	8.71356391953049e-17	9.25468936511556e-17
2008208	7	8.91580759520034e-17	9.40700383943285e-17
2008208	8	9.1963830181076e-17	9.67929366758235e-17
2008208	9	9.26213703886175e-17	9.73187240507531e-17
2008208	10	9.77967823500454e-17	1.05920003271846e-16
2008208	11	1.00707927116854e-16	1.1128584097211e-16
2008208	12	1.02027241030921e-16	1.13571748253082e-16
2008208	13	1.05164576765509e-16	1.1855244681846e-16
2008208	14	1.08780333289593e-16	1.23552371909412e-16
2008208	15	1.12502837516359e-16	1.28602727839542e-16
2008208	16	1.16112851728075e-16	1.33568305424506e-16
2008208	17	1.18932847966721e-16	1.35884748418106e-16
2008208	18	1.19531554935276e-16	1.33159055270789e-16
2008208	19	1.19734212966014e-16	1.32039888751012e-16
2008208	20	1.15989417612826e-16	1.27314639498891e-16
2008208	21	1.03750872530938e-16	1.11942302790699e-16
2008208	22	8.99868785735238e-17	9.43458219988002e-17
2008208	23	8.13151662924784e-17	8.34493332725824e-17
2008209	0	7.620538557466e-17	7.76790668650871e-17
2008209	1	7.29349025888236e-17	7.41700330316782e-17
2008209	2	7.06073293877857e-17	7.18449333405915e-17
2008209	3	6.91161829192325e-17	7.03965031014291e-17
2008209	4	6.81921510347233e-17	6.9391722263088e-17
2008209	5	6.70904127470967e-17	6.82900170924958e-17
2008209	6	6.57152570507465e-17	6.68360757071815e-17
2008209	7	6.5198610263475e-17	6.62666728461395e-17
2008209	8	6.52358377184077e-17	6.63804480991655e-17
2008209	9	6.68346002088618e-17	6.8334561460694e-17
2008209	10	6.89145733200588e-17	7.10940483590617e-17
2008209	11	6.79863785596e-17	7.05442260822008e-17
2008209	12	6.61061996267457e-17	6.85860690274338e-17
2008209	13	6.41330487858099e-17	6.66588996372374e-17
2008209	14	6.21034161984935e-17	6.44583131244818e-17
2008209	15	6.02656184143116e-17	6.24676537192499e-17
2008209	16	5.8753975206045e-17	6.08660338261543e-17
2008209	17	5.74413438831199e-17	5.93126784782126e-17
2008209	18	5.67543189475422e-17	5.83534308711599e-17
2008209	19	5.68687754726697e-17	5.8320847437048e-17
2008209	20	5.77827657320672e-17	5.91749635464449e-17
2008209	21	5.86084779677449e-17	5.99452922780088e-17
2008209	22	5.90090638790055e-17	6.02103069776701e-17
2008209	23	5.89557470376555e-17	6.00627361207742e-17
2008210	0	5.85708802318983e-17	5.97238245691258e-17
2008210	1	5.84316581848465e-17	5.97135682755155e-17
2008210	2	5.88158347197572e-17	6.0072877073572e-17
2008210	3	5.97243431337822e-17	6.08763838914364e-17
2008210	4	6.06129750841253e-17	6.1833683789752e-17
2008210	5	6.12547629160102e-17	6.24683023449131e-17
2008210	6	6.13121140496686e-17	6.2386649346999e-17
2008210	7	6.09151630660365e-17	6.20329995563859e-17
2008210	8	6.04284732713775e-17	6.1749222399322e-17
2008210	9	6.03519673919541e-17	6.21127635950999e-17
2008210	10	6.12829001320183e-17	6.4327900520417e-17
2008210	11	6.22673715494194e-17	6.64495732955081e-17
2008210	12	6.23582321251322e-17	6.67922764937384e-17
2008210	13	6.20978429957992e-17	6.65050426010205e-17
2008210	14	6.19022935901436e-17	6.62440653555832e-17
2008210	15	6.23092082093256e-17	6.63938472986066e-17
2008210	16	6.3381208705519e-17	6.72611565895841e-17
2008210	17	6.4910696384083e-17	6.85137886019615e-17
2008210	18	6.65746991153455e-17	6.97555331717781e-17
2008210	19	6.78802043750801e-17	7.06193713857886e-17
2008210	20	6.92450909043727e-17	7.18056761330327e-17
2008210	21	7.05030092998211e-17	7.295500278973e-17
2008210	22	7.18311109581446e-17	7.42560397830591e-17
2008210	23	7.27531515337782e-17	7.51350302000632e-17
2008211	0	7.3452089896413e-17	7.57547337741394e-17
2008211	1	7.44107266779319e-17	7.65512831142318e-17
2008211	2	7.50947901767898e-17	7.74651605303434e-17
2008211	3	7.58951756509775e-17	7.81375033579599e-17
2008211	4	7.63926636321056e-17	7.87573710886007e-17
2008211	5	7.69424969519176e-17	7.91665210200731e-17
2008211	6	7.75616313161212e-17	7.95758173827065e-17
2008211	7	7.69787276772253e-17	7.89914872660066e-17
2008211	8	7.64987179684154e-17	7.8945719944124e-17
2008211	9	7.61891967648421e-17	7.94810523914643e-17
2008211	10	7.73394248771602e-17	8.16398555722078e-17
2008211	11	7.82127073093929e-17	8.34358983333883e-17
2008211	12	7.8325937358889e-17	8.41324730301155e-17
2008211	13	7.78838881883075e-17	8.3905334058253e-17
2008211	14	7.73340889935561e-17	8.34302855205732e-17
2008211	15	7.68304282331803e-17	8.29247318704935e-17
2008211	16	7.63037674875921e-17	8.23835576885341e-17
2008211	17	7.56265843465432e-17	8.12369065920027e-17
2008211	18	7.50839041632027e-17	7.94316159979968e-17
2008211	19	7.51349782792402e-17	7.84230454281453e-17
2008211	20	7.51002458008157e-17	7.7947463053595e-17
2008211	21	7.52868868145343e-17	7.81872122955467e-17
2008211	22	7.47242645351981e-17	7.76348980864116e-17
2008211	23	7.39882692572526e-17	7.68774391520347e-17
2008212	0	7.32408562151453e-17	7.61490215726094e-17
2008212	1	7.23629148193195e-17	7.52845418873633e-17
2008212	2	7.13688415332302e-17	7.43945938514508e-17
2008212	3	7.06440339443573e-17	7.36654653586355e-17
2008212	4	6.98747284424308e-17	7.27509645506633e-17
2008212	5	6.86768223809805e-17	7.15016093718782e-17
2008212	6	6.68762954322402e-17	6.95337132020081e-17
2008212	7	6.64045696135629e-17	6.92588167259978e-17
2008212	8	6.5506538992912e-17	6.89867027482455e-17
2008212	9	6.73702326859896e-17	7.16996551958686e-17
2008212	10	6.93740641278841e-17	7.46598213383449e-17
2008212	11	6.96836293499848e-17	7.55241200691493e-17
2008212	12	6.78733423751203e-17	7.39982069194817e-17
2008212	13	6.61706429816734e-17	7.2541671292217e-17
2008212	14	6.47821357135585e-17	7.14138636435304e-17
2008212	15	6.34950944431546e-17	7.01897771651338e-17
2008212	16	6.24082512148442e-17	6.90231175001823e-17
2008212	17	6.13887549972665e-17	6.74981596567405e-17
2008212	18	6.045731924966e-17	6.57052963411136e-17
2008212	19	5.96047035834499e-17	6.38439862441014e-17
2008212	20	5.96935426509222e-17	6.31330421576739e-17
2008212	21	5.96210024173008e-17	6.26625502623033e-17
2008212	22	5.95960306625781e-17	6.26179167367122e-17
2008212	23	5.96145088161458e-17	6.26875504063798e-17
2008213	0	5.98863853193383e-17	6.33128101818674e-17
2008213	1	6.04102021284484e-17	6.40646043592023e-17
2008213	2	6.11344282920445e-17	6.50045747614772e-17
2008213	3	6.24054418429225e-17	6.62647076114829e-17
2008213	4	6.40014495932097e-17	6.77584459220521e-17
2008213	5	6.57822735473037e-17	6.90014762765698e-17
2008213	6	6.6330687147654e-17	6.94063638882385e-17
2008213	7	6.8102579278576e-17	7.1607250163714e-17
2008213	8	6.86320479151437e-17	7.27739378097229e-17
2008213	9	7.14159865899224e-17	7.7464265203964e-17
2008213	10	7.18864261227071e-17	7.87378452148972e-17
2008213	11	6.8960747743404e-17	7.54238340765214e-17
2008213	12	6.55911564871442e-17	7.20848777860551e-17
2008213	13	6.40862153564751e-17	7.10758647922046e-17
2008213	14	6.28403817026972e-17	6.99859131839516e-17
2008213	15	6.1655307774582e-17	6.87647254292154e-17
2008213	16	6.08108336451484e-17	6.77388661922205e-17
2008213	17	6.07266909019145e-17	6.66354988675973e-17
2008213	18	6.1568751964818e-17	6.61654795443339e-17
2008213	19	6.2543345535928e-17	6.63529040598318e-17
2008213	20	6.35013576180967e-17	6.67265345195486e-17
2008213	21	6.38199972732952e-17	6.67917631621044e-17
2008213	22	6.33958438497801e-17	6.65498293827207e-17
2008213	23	6.30066431236225e-17	6.64967362214198e-17
2008214	0	6.2173186325927e-17	6.60174473761627e-17
2008214	1	6.14405288016832e-17	6.57678564845396e-17
2008214	2	6.07186727487795e-17	6.56377411008966e-17
2008214	3	5.9790514537835e-17	6.53762362357286e-17
2008214	4	5.92021477838888e-17	6.56283747474156e-17
2008214	5	5.90887478839207e-17	6.6391231832687e-17
2008214	6	5.92804334503728e-17	6.84542538178381e-17
2008214	7	6.1902468137827e-17	7.28013105123528e-17
2008214	8	6.38269504053432e-17	7.5584045371093e-17
2008214	9	6.70758656612621e-17	8.11362055880147e-17
2008214	10	7.03247076913442e-17	8.70419221421615e-17
2008214	11	6.98961044620817e-17	8.71578485448911e-17
2008214	12	7.0171720117309e-17	8.81505104904697e-17
2008214	13	6.9149689516177e-17	8.75701361922076e-17
2008214	14	6.7584701682708e-17	8.7253970698205e-17
2008214	15	6.54588712885256e-17	8.64156304402398e-17
2008214	16	6.32491236630515e-17	8.44838223512897e-17
2008214	17	6.11778085421101e-17	8.25921611034791e-17
2008214	18	6.05155433926538e-17	8.10035954705053e-17
2008214	19	5.94668965762419e-17	7.81166906506636e-17
2008214	20	6.32947808298338e-17	8.3677881458782e-17
2008214	21	6.73145181364097e-17	9.06955227818706e-17
2008214	22	7.36784090147507e-17	1.01453757220813e-16
2008214	23	8.42470888261422e-17	1.18775270614717e-16
2008215	0	9.5798571180786e-17	1.42116697370922e-16
2008215	1	1.06639197602047e-16	1.60613725775168e-16
2008215	2	1.09518110557432e-16	1.64782335954543e-16
2008215	3	1.09549820140297e-16	1.59353240099255e-16
2008215	4	1.10049498116253e-16	1.61406975963217e-16
2008215	5	1.06153804472311e-16	1.4820213742059e-16
2008215	6	1.04913684446579e-16	1.34758126675248e-16
2008215	7	1.1101533887747e-16	1.3840101440923e-16
2008215	8	1.10521553883345e-16	1.30326275860197e-16
2008215	9	1.07820343782844e-16	1.24792962228135e-16
2008215	10	1.05906802920495e-16	1.23577135934391e-16
2008215	11	1.04671760043805e-16	1.24588152763501e-16
2008215	12	1.04583297102757e-16	1.24860118293855e-16
2008215	13	1.05681775656016e-16	1.24732991876806e-16
2008215	14	1.08207432307405e-16	1.26653683845731e-16
2008215	15	1.08989426778744e-16	1.24642923686031e-16
2008215	16	1.07108760355156e-16	1.21068313353519e-16
2008215	17	1.04483463033976e-16	1.16203448033426e-16
2008215	18	1.02123120162131e-16	1.11262757177086e-16
2008215	19	9.82169667348049e-17	1.04529431728123e-16
2008215	20	9.51471993166836e-17	1.00464920547124e-16
2008215	21	9.22352844736073e-17	9.71810628307423e-17
2008215	22	8.83087948662791e-17	9.30789418646475e-17
2008215	23	8.44230613589075e-17	8.91185627288729e-17
2008216	0	8.48851927425812e-17	9.0293567686793e-17
2008216	1	8.48310885686557e-17	9.07125222853691e-17
2008216	2	8.45528694673057e-17	9.03524938454364e-17
2008216	3	8.41414529915111e-17	8.97881369949951e-17
2008216	4	8.02082413313707e-17	8.77691051314903e-17
2008216	5	7.62100222847471e-17	8.30189608782154e-17
2008216	6	7.30516747990548e-17	7.8131987984925e-17
2008216	7	7.2604849792436e-17	7.61634382870952e-17
2008216	8	7.06746742568641e-17	7.46722324234262e-17
2008216	9	6.69445033297053e-17	7.16535085641349e-17
2008216	10	8.46897655349206e-17	1.02270339802624e-16
2008216	11	1.09081896060235e-16	1.39492223759834e-16
2008216	12	1.08059227562509e-16	1.33904751756605e-16
2008216	13	1.07706248814101e-16	1.31355170689195e-16
2008216	14	1.03448470867284e-16	1.2854937190843e-16
2008216	15	9.73655793526009e-17	1.24000102806831e-16
2008216	16	8.66823054910008e-17	1.03254328155573e-16
2008216	17	7.82090529935802e-17	8.9025362932328e-17
2008216	18	7.1669893681133e-17	7.888984257364e-17
2008216	19	6.72459643966235e-17	7.23773358543767e-17
2008216	20	6.43281999491076e-17	6.87387738537257e-17
2008216	21	6.38610313436078e-17	6.79647334583547e-17
2008216	22	6.5620006749425e-17	6.96674434197348e-17
2008216	23	6.83383297118622e-17	7.21236687115669e-17
2008217	0	7.04593379806831e-17	7.5023127144048e-17
2008217	1	7.3199676433511e-17	7.86433069616696e-17
2008217	2	7.72599406241439e-17	8.32752113887582e-17
2008217	3	8.24502523750379e-17	8.91061664590486e-17
2008217	4	9.12793648678077e-17	1.01804393150594e-16
2008217	5	1.05519904230863e-16	1.2930178233299e-16
2008217	6	9.05086208565376e-17	1.28166424268185e-16
2008217	7	9.40556821397266e-17	1.36535459783446e-16
2008217	8	1.15344799217536e-16	1.62462978649142e-16
2008217	9	1.1975541514956e-16	1.66881965762004e-16
2008217	10	1.16259589561678e-16	1.55328400136206e-16
2008217	11	1.16637867782353e-16	1.57881293573697e-16
2008217	12	1.07250043876324e-16	1.47514025669796e-16
2008217	13	1.07082054987421e-16	1.45766743893326e-16
2008217	14	1.00128044831645e-16	1.37196136528434e-16
2008217	15	1.24833667991777e-16	1.64334729606868e-16
2008217	16	1.19878751464843e-16	1.51072998588683e-16
2008217	17	1.20401342830445e-16	1.68118709131762e-16
2008217	18	1.22517125451028e-16	1.68698303035262e-16
2008217	19	1.22185291687759e-16	1.68738528399729e-16
2008217	20	1.20934800295101e-16	1.68729377996561e-16
2008217	21	1.07774785213826e-16	1.4311472380274e-16
2008217	22	1.04326578160795e-16	1.36060404781967e-16
2008217	23	9.41900956041392e-17	1.23206729419758e-16
2008218	0	8.97909403107226e-17	1.1737373868477e-16
2008218	1	9.17795344667488e-17	1.20151494512645e-16
2008218	2	8.98501871388032e-17	1.1731047496017e-16
2008218	3	8.79308454325048e-17	1.15852255798274e-16
2008218	4	1.1779204520672e-16	1.70344190593265e-16
2008218	5	1.17655839409487e-16	1.69601996335273e-16
2008218	6	1.18467613614026e-16	1.69396707892172e-16
2008218	7	1.20282560197148e-16	1.69600359511736e-16
2008218	8	1.17440079954376e-16	1.57724227824251e-16
2008218	9	1.12979937073321e-16	1.48283365244819e-16
2008218	10	1.0725408023903e-16	1.38386036844062e-16
2008218	11	1.08144059339195e-16	1.38978012402356e-16
2008218	12	1.08093189668173e-16	1.37575310283996e-16
2008218	13	1.05520639455308e-16	1.32794008401718e-16
2008218	14	1.00623752366189e-16	1.25057291927561e-16
2008218	15	9.4434445453931e-17	1.16027490266993e-16
2008218	16	8.87096207618747e-17	1.08101806486909e-16
2008218	17	8.68256643888925e-17	1.08519372562518e-16
2008218	18	1.17987112859653e-16	1.74753186747462e-16
2008218	19	1.14109747787155e-16	1.623297575996e-16
2008218	20	1.0893100799561e-16	1.49242580541445e-16
2008218	21	1.034665027609e-16	1.37585970054523e-16
2008218	22	1.00187618602372e-16	1.31953712872976e-16
2008218	23	9.76701255253119e-17	1.27364468603531e-16
2008219	0	9.53589816629667e-17	1.23954072110807e-16
2008219	1	9.35951357954229e-17	1.20716368932671e-16
2008219	2	9.32086728676898e-17	1.23950099451744e-16
2008219	3	9.35466502630515e-17	1.33797392776345e-16
2008219	4	9.19476733435364e-17	1.34353909980706e-16
2008219	5	9.00085404898501e-17	1.31073506263089e-16
2008219	6	9.2035567360411e-17	1.27881502805269e-16
2008219	7	9.39472530039005e-17	1.28449772645549e-16
2008219	8	9.28894708205736e-17	1.26518419853738e-16
2008219	9	9.04022632987338e-17	1.22370689016944e-16
2008219	10	8.71708287733022e-17	1.17952474703557e-16
2008219	11	8.39811303235376e-17	1.13037126216876e-16
2008219	12	8.04993202473268e-17	1.07505812925296e-16
2008219	13	7.71879383855902e-17	1.01951265413668e-16
2008219	14	7.39920650170675e-17	9.71606012928681e-17
2008219	15	7.17827390423515e-17	9.34865680984899e-17
2008219	16	6.99374471083623e-17	9.06534127934639e-17
2008219	17	6.82077399893096e-17	8.8378551534979e-17
2008219	18	6.60738993789008e-17	8.56109806616248e-17
2008219	19	6.40378048404281e-17	8.29090383649559e-17
2008219	20	6.23486247076158e-17	7.98704136329502e-17
2008219	21	6.07988382933125e-17	7.7147548835727e-17
2008219	22	5.99781813571878e-17	7.48624358825778e-17
2008219	23	5.90717165608081e-17	7.22486454276452e-17
2008220	0	5.87184747269405e-17	7.00370878555087e-17
2008220	1	5.83785831872567e-17	6.81990189339728e-17
2008220	2	5.78562655164297e-17	6.67377485602044e-17
2008220	3	5.74705770055731e-17	6.58548979525367e-17
2008220	4	5.58353970194462e-17	6.52047128168187e-17
2008220	5	5.68553338252077e-17	6.77731875294855e-17
2008220	6	5.90205785826352e-17	7.08021916336133e-17
2008220	7	6.27901362188763e-17	7.4940456790246e-17
2008220	8	6.83265219123202e-17	8.1224971572734e-17
2008220	9	7.54076496549159e-17	9.12959401914097e-17
2008220	10	7.83421124566213e-17	9.52438809997859e-17
2008220	11	7.89168103791373e-17	9.65699718977547e-17
2008220	12	7.36573674924663e-17	8.76445308332452e-17
2008220	13	6.95956922692275e-17	8.04321161704035e-17
2008220	14	6.56268096006166e-17	7.39298789876957e-17
2008220	15	6.19345279601682e-17	6.78511777185977e-17
2008220	16	5.94181365310672e-17	6.42119912364975e-17
2008220	17	5.76628837806876e-17	6.18213043454332e-17
2008220	18	5.66057136885342e-17	6.0364644208424e-17
2008220	19	5.5818075905404e-17	5.93011044076133e-17
2008220	20	5.55968997962971e-17	5.9027852140316e-17
2008220	21	5.81392585054297e-17	6.28217941593901e-17
2008220	22	6.76635541171585e-17	7.71463920235584e-17
2008220	23	8.14952718133362e-17	9.74404417738423e-17
2008221	0	1.10191424448141e-16	1.46450889796747e-16
2008221	1	1.15027497573447e-16	1.63284487710513e-16
2008221	2	1.18010073018414e-16	1.72384527959224e-16
2008221	3	1.21380784367839e-16	1.76392778985546e-16
2008221	4	1.18208407709747e-16	1.71646985494014e-16
2008221	5	1.16353262716122e-16	1.66891567665301e-16
2008221	6	1.09868824795584e-16	1.5651507771213e-16
2008221	7	1.16056489161509e-16	1.65860081291427e-16
2008221	8	1.21128411131893e-16	1.71310272575573e-16
2008221	9	9.8580263248664e-17	1.39631240191883e-16
2008221	10	8.05847029055964e-17	1.12511225118164e-16
2008221	11	1.18266409505192e-16	1.61479422644728e-16
2008221	12	1.1570110952257e-16	1.40972320871535e-16
2008221	13	1.0902742925399e-16	1.3058932878552e-16
2008221	14	1.16876754619491e-16	1.5134676861876e-16
2008221	15	1.04457035774877e-16	1.42404503825524e-16
2008221	16	1.09465199998459e-16	1.48624637841461e-16
2008221	17	1.13672191427841e-16	1.56032232017307e-16
2008221	18	1.21532481943326e-16	1.69242397439875e-16
2008221	19	1.19423041681595e-16	1.70685662062162e-16
2008221	20	1.14083713079937e-16	1.62435971401791e-16
2008221	21	1.16400839375958e-16	1.61697405513513e-16
2008221	22	1.20820005412075e-16	1.67404923740996e-16
2008221	23	1.2064467952627e-16	1.67331746922679e-16
2008222	0	1.1997231975493e-16	1.66804914055738e-16
2008222	1	9.10121631061407e-17	1.1493615862163e-16
2008222	2	8.75134214959428e-17	1.06869175418021e-16
2008222	3	9.1841917312398e-17	1.13337751597475e-16
2008222	4	9.46570427432966e-17	1.17784651925546e-16
2008222	5	9.13181353690014e-17	1.12985819032077e-16
2008222	6	8.67625939066689e-17	1.07165215817457e-16
2008222	7	8.29622282168268e-17	1.01705581171742e-16
2008222	8	8.0413040071154e-17	9.84226732231849e-17
2008222	9	8.08127356096063e-17	9.79922681070817e-17
2008222	10	8.30140593781969e-17	9.92252676729316e-17
2008222	11	8.45818704763623e-17	1.01112039935957e-16
2008222	12	8.47757674884116e-17	1.01042208865502e-16
2008222	13	8.33580315827732e-17	9.88131490357954e-17
2008222	14	8.14420382097298e-17	9.50606583829769e-17
2008222	15	7.93988935487804e-17	9.1156240202931e-17
2008222	16	7.92545043254532e-17	9.14131937989089e-17
2008222	17	7.4729935898033e-17	8.55403476667519e-17
2008222	18	6.96507437560002e-17	7.87884938963502e-17
2008222	19	6.48210244380647e-17	7.4041821121975e-17
2008222	20	5.96365076010332e-17	7.18264505628769e-17
2008222	21	5.96490181940047e-17	7.10753157880237e-17
2008222	22	6.07752321202081e-17	7.22669768543444e-17
2008222	23	6.16673813518071e-17	7.31607421842402e-17
2008223	0	6.29322564898663e-17	7.375610952179e-17
2008223	1	6.36516334129938e-17	7.36321473192841e-17
2008223	2	6.28367895102573e-17	7.30583414253968e-17
2008223	3	6.28213006070399e-17	7.25757138467852e-17
2008223	4	6.27034281718742e-17	7.23417250592619e-17
2008223	5	6.13908361694664e-17	7.21028811439552e-17
2008223	6	6.26675800564679e-17	7.3127743445577e-17
2008223	7	6.44476481952033e-17	7.52370729184284e-17
2008223	8	6.3676421434254e-17	7.49217126034943e-17
2008223	9	6.18840897764474e-17	7.36350458506377e-17
2008223	10	6.0383470236201e-17	7.19133874454322e-17
2008223	11	5.96593552411044e-17	6.97768109596236e-17
2008223	12	5.90644749813978e-17	6.81931598347403e-17
2008223	13	5.82921918804878e-17	6.6036585781144e-17
2008223	14	5.7628155044871e-17	6.43688722142589e-17
2008223	15	5.70423360689946e-17	6.33242844607383e-17
2008223	16	5.67089841101305e-17	6.24766247904006e-17
2008223	17	5.67407979076869e-17	6.18996349580763e-17
2008223	18	5.65884931788758e-17	6.16973147569255e-17
2008223	19	5.65156552634149e-17	6.21026192566705e-17
2008223	20	5.62356018367711e-17	6.19157941210436e-17
2008223	21	5.67103257088474e-17	6.2498035807181e-17
2008223	22	5.70964290726658e-17	6.28928783779245e-17
2008223	23	5.6815505985459e-17	6.24176904484385e-17
2008224	0	5.57680362963142e-17	6.11583002333986e-17
2008224	1	5.44411363342516e-17	5.98613119956433e-17
2008224	2	5.33979835856517e-17	5.88472563564849e-17
2008224	3	5.22660047443473e-17	5.77272193986131e-17
2008224	4	5.13472443289657e-17	5.67602854058017e-17
2008224	5	5.17228388852885e-17	5.75864711335208e-17
2008224	6	5.29535361205822e-17	5.89784260631779e-17
2008224	7	5.53594020937982e-17	6.24771781741623e-17
2008224	8	6.81604994621837e-17	8.37155265588104e-17
2008224	9	1.2814701633465e-16	1.83228698128577e-16
2008224	10	1.17892264524978e-16	1.69937979376921e-16
2008224	11	1.04588109429466e-16	1.52559810485659e-16
2008224	12	1.16960630696231e-16	1.63801883362739e-16
2008224	13	1.25795916717123e-16	1.83209488566776e-16
2008224	14	1.30229735354132e-16	1.86320330016063e-16
2008224	15	1.25962352906214e-16	1.70643283270052e-16
2008224	16	1.19057854440659e-16	1.55469067164041e-16
2008224	17	1.12238187637168e-16	1.44042506533619e-16
2008224	18	1.06568743783222e-16	1.35529721466504e-16
2008224	19	1.00514051723222e-16	1.24621076506816e-16
2008224	20	1.02015562784739e-16	1.29343814785002e-16
2008224	21	1.06371844764747e-16	1.39518149595527e-16
2008224	22	1.22128842190509e-16	1.8230923749807e-16
2008224	23	1.22424425853291e-16	1.83247286167238e-16
2008225	0	1.2090117130149e-16	1.83558868836667e-16
2008225	1	1.18892796169345e-16	1.84125576696458e-16
2008225	2	1.00984129554841e-16	1.57053371849197e-16
2008225	3	1.01216547977227e-16	1.57429171198554e-16
2008225	4	9.85051570808859e-17	1.49745742293797e-16
2008225	5	9.07863517303193e-17	1.25565142161155e-16
2008225	6	8.05229081256346e-17	1.02670069370876e-16
2008225	7	7.26257085926427e-17	8.90051073010835e-17
2008225	8	6.84597769619907e-17	8.26375043019207e-17
2008225	9	6.85064019019791e-17	8.2867740261542e-17
2008225	10	7.01724863070924e-17	8.52831971659277e-17
2008225	11	7.24617281104801e-17	9.00449521086633e-17
2008225	12	8.78986712608498e-17	1.19179949765566e-16
2008225	13	1.11131747631285e-16	1.59931685418311e-16
2008225	14	1.11879327425319e-16	1.4605522728425e-16
2008225	15	1.08934558409612e-16	1.3585282798767e-16
2008225	16	1.05639745834468e-16	1.28614172599107e-16
2008225	17	1.04009951269695e-16	1.28162791403157e-16
2008225	18	1.07215256217183e-16	1.37255841206723e-16
2008225	19	1.07874959504896e-16	1.44185151746994e-16
2008225	20	1.16842491236333e-16	1.66738704574979e-16
2008225	21	1.19526879294103e-16	1.66079897836661e-16
2008225	22	1.21399207015203e-16	1.6730116571603e-16
2008225	23	1.05629033453254e-16	1.42247361308199e-16
2008226	0	1.21839969719419e-16	1.69149064957853e-16
2008226	1	1.22509636672704e-16	1.70026925984135e-16
2008226	2	1.26704598303486e-16	1.72450970241291e-16
2008226	3	1.29187922700586e-16	1.73322888044564e-16
2008226	4	1.2873591969156e-16	1.7220023096697e-16
2008226	5	1.27667385800205e-16	1.70350936447981e-16
2008226	6	1.25777239819761e-16	1.67693721733979e-16
2008226	7	1.28448885269641e-16	1.6603413252894e-16
2008226	8	1.26354262611671e-16	1.56562011070536e-16
2008226	9	1.24503014083278e-16	1.51769669464607e-16
2008226	10	1.23145896836098e-16	1.47516637464063e-16
2008226	11	1.22354883438835e-16	1.43882736611407e-16
2008226	12	1.20689654708479e-16	1.39462250842917e-16
2008226	13	1.17792650009762e-16	1.34779547072e-16
2008226	14	1.13172340815329e-16	1.27665295290443e-16
2008226	15	1.09876847204932e-16	1.22737303798097e-16
2008226	16	1.07396122213076e-16	1.18694735104062e-16
2008226	17	1.04320085281717e-16	1.13466384963372e-16
2008226	18	1.02857141156916e-16	1.12320847160016e-16
2008226	19	1.26388537242145e-16	1.57305922316052e-16
2008226	20	1.30606331819261e-16	1.63919439107407e-16
2008226	21	1.2725749538282e-16	1.58692245865283e-16
2008226	22	1.21495276923837e-16	1.49985751001055e-16
2008226	23	1.19421431302237e-16	1.46278710049961e-16
2008227	0	1.1972483658162e-16	1.47152117130911e-16
2008227	1	1.20800668324324e-16	1.48147779291222e-16
2008227	2	1.22305049732208e-16	1.52079266580131e-16
2008227	3	1.22590667202113e-16	1.52318157339102e-16
2008227	4	1.23263775354098e-16	1.49337755389515e-16
2008227	5	1.22017645580477e-16	1.43413491133416e-16
2008227	6	1.182346720163e-16	1.36495302445815e-16
2008227	7	1.13874132800178e-16	1.30960620391329e-16
2008227	8	1.09680814978759e-16	1.25763160303082e-16
2008227	9	1.05319016780621e-16	1.19394697257039e-16
2008227	10	1.00418746656592e-16	1.13305035546481e-16
2008227	11	9.55288397604366e-17	1.06860876977487e-16
2008227	12	9.16376353612193e-17	1.01752623633668e-16
2008227	13	8.86861442307366e-17	9.83258805196028e-17
2008227	14	8.67652993593011e-17	9.59416522365183e-17
2008227	15	8.52364560404845e-17	9.36344304527268e-17
2008227	16	8.41288156463394e-17	9.23098223960079e-17
2008227	17	1.23790845134022e-16	1.70450254062516e-16
2008227	18	9.82386036607875e-17	1.18351408764188e-16
2008227	19	9.06190521344597e-17	1.01790330886887e-16
2008227	20	8.82614854489068e-17	9.58554632295758e-17
2008227	21	8.6479029425534e-17	9.29354611003191e-17
2008227	22	8.43445653254755e-17	9.02209278986786e-17
2008227	23	8.28008381840362e-17	8.83833154008692e-17
2008228	0	8.01810221913111e-17	8.55457369999008e-17
2008228	1	7.80913716974611e-17	8.33904374641377e-17
2008228	2	7.5760325444261e-17	8.13605975280891e-17
2008228	3	7.33510390812182e-17	7.893555481643e-17
2008228	4	7.14063702886613e-17	7.77182758175784e-17
2008228	5	7.69651442481978e-17	8.45502490075723e-17
2008228	6	8.53316686805657e-17	9.46451495595148e-17
2008228	7	8.86902588972828e-17	1.00369451511168e-16
2008228	8	9.30624875628889e-17	1.08427076447836e-16
2008228	9	9.46891581761555e-17	1.11537631816481e-16
2008228	10	9.67361980803055e-17	1.14717681736866e-16
2008228	11	9.72718762052527e-17	1.1625147740551e-16
2008228	12	9.29618395737987e-17	1.14524316516171e-16
2008228	13	8.64775751964166e-17	1.09545338305206e-16
2008228	14	7.80416099684863e-17	9.7278569415963e-17
2008228	15	1.3691649917782e-17	2.10239524064395e-17
2008228	16	1.09675144697137e-19	1.71702639766663e-19
2008228	17	9.82383533654126e-18	1.23901900719306e-17
2008228	18	1.66186008945611e-17	2.1048330572363e-17
2008228	19	2.49935697112212e-17	3.35119268435063e-17
2008228	20	4.05312198994932e-17	5.8364954559466e-17
2008228	21	5.42902313266208e-17	7.92155297210883e-17
2008228	22	6.27302370428641e-17	9.16459787053266e-17
2008228	23	6.75745448355348e-17	9.73570679722111e-17
2008229	0	7.01959002879024e-17	1.01206105620514e-16
2008229	1	7.31606030996801e-17	1.04776715490708e-16
2008229	2	7.46454096487e-17	1.07962550354194e-16
2008229	3	7.65083782072644e-17	1.10432836766647e-16
2008229	4	7.80369927463666e-17	1.12455082048913e-16
2008229	5	8.3034943783725e-17	1.1415897807009e-16
2008229	6	9.03646620493824e-17	1.19343038297104e-16
2008229	7	9.31288945891575e-17	1.19636864844797e-16
2008229	8	9.80584778689153e-17	1.27028009568535e-16
2008229	9	9.94120481101821e-17	1.28141163916226e-16
2008229	10	9.91687286793951e-17	1.26995560889108e-16
2008229	11	9.73074938494545e-17	1.23080585674917e-16
2008229	12	9.46990803384303e-17	1.18657306618675e-16
2008229	13	9.22836278706504e-17	1.15141155573203e-16
2008229	14	8.94348886005899e-17	1.11247658657207e-16
2008229	15	8.63107540117554e-17	1.0632477648198e-16
2008229	16	8.30642480758824e-17	1.01609843947945e-16
2008229	17	7.99235861697748e-17	9.61285405162944e-17
2008229	18	7.61046296885071e-17	9.01920272593128e-17
2008229	19	7.26160495889068e-17	8.52932909666489e-17
2008229	20	7.16588937767438e-17	8.39620972197724e-17
2008229	21	7.13119835991223e-17	8.31163115908458e-17
2008229	22	7.11351282121066e-17	8.3253360106435e-17
2008229	23	7.1847358827446e-17	8.51037534726477e-17
2008230	0	7.26711398298917e-17	8.67116249466824e-17
2008230	1	7.24197935315274e-17	8.73103257691281e-17
2008230	2	7.19267876193224e-17	8.72061900879532e-17
2008230	3	7.20372431301103e-17	8.7267683921188e-17
2008230	4	7.26864614104766e-17	8.74508193453044e-17
2008230	5	7.3636858317527e-17	8.76087262465478e-17
2008230	6	7.51360397140254e-17	8.83505000536744e-17
2008230	7	7.72834146081211e-17	9.00307664346672e-17
2008230	8	8.03435329322476e-17	9.19327882992823e-17
2008230	9	8.42565579414444e-17	9.9584606923067e-17
2008230	10	9.00204515497535e-17	1.12978026285185e-16
2008230	11	9.35288402950452e-17	1.22189765970687e-16
2008230	12	9.42544570626026e-17	1.250760772594e-16
2008230	13	9.28209560884437e-17	1.23239604553689e-16
2008230	14	9.05474349841686e-17	1.19213326588255e-16
2008230	15	8.77072722430249e-17	1.15209265557641e-16
2008230	16	8.40496148808261e-17	1.11139516904412e-16
2008230	17	8.16401968019054e-17	1.0645844551757e-16
2008230	18	8.04099761326062e-17	1.02385027068789e-16
2008230	19	7.86769009084942e-17	9.57512209244956e-17
2008230	20	7.7211857381106e-17	9.22002007490686e-17
2008230	21	7.55888225705949e-17	8.92949794757601e-17
2008230	22	7.17533325597597e-17	8.62729162319116e-17
2008230	23	7.2142767899197e-17	8.77605652330801e-17
2008231	0	6.98726178683876e-17	8.45154274931892e-17
2008231	1	6.93043330467295e-17	8.2267230330999e-17
2008231	2	6.77265945686492e-17	7.95845663343433e-17
2008231	3	6.53808356746456e-17	7.79486383040794e-17
2008231	4	6.50038460385539e-17	7.84621816433887e-17
2008231	5	6.67331891905307e-17	8.08125033926934e-17
2008231	6	6.98445777512041e-17	8.53598882096578e-17
2008231	7	7.66882227039089e-17	9.26725891519648e-17
2008231	8	7.83523697711452e-17	9.21766286605518e-17
2008231	9	7.94863253367895e-17	9.3277398073704e-17
2008231	10	8.34604409711046e-17	9.98774251787085e-17
2008231	11	9.32778164995987e-17	1.15776819143957e-16
2008231	12	1.02666321625296e-16	1.31581507445189e-16
2008231	13	1.06549983180682e-16	1.35212325987045e-16
2008231	14	1.0896317328853e-16	1.42855422360377e-16
2008231	15	1.20447364959583e-16	1.71384228018661e-16
2008231	16	1.15262408501067e-16	1.53745749101907e-16
2008231	17	1.07338758563263e-16	1.36392260954461e-16
2008231	18	1.02123220419703e-16	1.23806170299208e-16
2008231	19	9.88260977240809e-17	1.1655315873804e-16
2008231	20	9.69848400543001e-17	1.13153806446589e-16
2008231	21	9.6754792031502e-17	1.09858110646136e-16
2008231	22	9.71212388119148e-17	1.06938695220145e-16
2008231	23	9.54531065322585e-17	1.04229498046099e-16
2008232	0	9.39701680579372e-17	1.02090828520561e-16
2008232	1	9.30844892175722e-17	1.00490835677391e-16
2008232	2	9.21589710635354e-17	9.93709254148212e-17
2008232	3	9.16565350077756e-17	9.90801014030981e-17
2008232	4	8.98121430997672e-17	9.87533202533362e-17
2008232	5	8.80515316661334e-17	9.86137590041578e-17
2008232	6	8.68419135777095e-17	9.83148153423917e-17
2008232	7	8.69861141213657e-17	9.81282309663826e-17
2008232	8	8.42417738361974e-17	9.26758900713525e-17
2008232	9	8.07459394205815e-17	8.92042154626894e-17
2008232	10	8.27505299332244e-17	9.61772623905944e-17
2008232	11	8.65920821191466e-17	1.03380793386248e-16
2008232	12	9.13020086889844e-17	1.0954576858361e-16
2008232	13	9.27247320399672e-17	1.10377891588896e-16
2008232	14	9.03709057889701e-17	1.05577898412374e-16
2008232	15	8.44927819761336e-17	9.74266504931524e-17
2008232	16	7.92720915222534e-17	9.00748382988808e-17
2008232	17	7.76410108960647e-17	8.65232891604843e-17
2008232	18	7.7104640797608e-17	8.42139112523539e-17
2008232	19	7.92818351380054e-17	8.58454393258641e-17
2008232	20	7.96984216900153e-17	8.65398766236627e-17
2008232	21	8.01457791282248e-17	8.78669348331514e-17
2008232	22	8.09331686352342e-17	8.86791950781957e-17
2008232	23	8.33686452637964e-17	9.00622350586448e-17
2008233	0	8.62485647904412e-17	9.54908732904793e-17
2008233	1	9.14305808335605e-17	1.04479003173733e-16
2008233	2	9.64356445796145e-17	1.13324985715702e-16
2008233	3	1.04381858916425e-16	1.22489529475625e-16
2008233	4	1.09217972977404e-16	1.25671300652452e-16
2008233	5	1.09787836672167e-16	1.21470303763572e-16
2008233	6	1.06291985195897e-16	1.15009651010433e-16
2008233	7	1.04007948197379e-16	1.10784035538695e-16
2008233	8	1.05469326225349e-16	1.1462583088048e-16
2008233	9	1.07745265887622e-16	1.2192828923218e-16
2008233	10	1.10183012445457e-16	1.28391229948115e-16
2008233	11	1.10170949148299e-16	1.31318886000384e-16
2008233	12	1.07109913790447e-16	1.28399619640095e-16
2008233	13	1.04291220020752e-16	1.25037950699471e-16
2008233	14	1.04091334050617e-16	1.25368844073217e-16
2008233	15	1.05868108449058e-16	1.26303361955809e-16
2008233	16	1.07155082039617e-16	1.2765174119565e-16
2008233	17	1.09196550282134e-16	1.30041140862769e-16
2008233	18	1.10041725102707e-16	1.32170384287177e-16
2008233	19	1.08162726787124e-16	1.34376388461265e-16
2008233	20	1.12052576363239e-16	1.45992204626159e-16
2008233	21	1.11817312908821e-16	1.48975112944334e-16
2008233	22	1.16673620114848e-16	1.68536276539563e-16
2008233	23	1.171004494249e-16	1.69428276731692e-16
2008234	0	1.16628435385938e-16	1.69320114592911e-16
2008234	1	1.16695768887853e-16	1.70075735252637e-16
2008234	2	1.03477163519728e-16	1.42329253124294e-16
2008234	3	1.05416764589507e-16	1.43519317177293e-16
2008234	4	1.09365302904408e-16	1.49872424412146e-16
2008234	5	1.10341633668183e-16	1.51175737645384e-16
2008234	6	1.07284194764379e-16	1.4322013399519e-16
2008234	7	1.02196572910381e-16	1.31949758208767e-16
2008234	8	9.61015430855498e-17	1.21468480256848e-16
2008234	9	9.26763701366703e-17	1.15024913564716e-16
2008234	10	9.1241124745202e-17	1.10814387714625e-16
2008234	11	9.06256989299851e-17	1.08452484540973e-16
2008234	12	9.13069998968172e-17	1.08964167194324e-16
2008234	13	9.14849212038003e-17	1.08893698244132e-16
2008234	14	9.07194665106268e-17	1.07094533527162e-16
2008234	15	8.91903227509768e-17	1.04466491822073e-16
2008234	16	8.82360118328926e-17	1.02883960494345e-16
2008234	17	8.66609050832005e-17	9.88172241240512e-17
2008234	18	8.52176536279452e-17	9.42186920976501e-17
2008234	19	8.34869056303675e-17	9.06686033244885e-17
2008234	20	8.21713185729839e-17	8.91840569542348e-17
2008234	21	8.17915379079209e-17	8.85912543778681e-17
2008234	22	8.12963085436488e-17	8.74557104108303e-17
2008234	23	8.00168103920159e-17	8.59027548495074e-17
2008235	0	7.80253469291052e-17	8.43641424757027e-17
2008235	1	7.60207534177206e-17	8.30462038230146e-17
2008235	2	7.51180580254819e-17	8.23308850190711e-17
2008235	3	7.44078883293435e-17	8.17131045354741e-17
2008235	4	7.40917954918009e-17	8.18245117110706e-17
2008235	5	7.42924781027853e-17	8.14296601135494e-17
2008235	6	7.35946612445232e-17	8.02457889001666e-17
2008235	7	7.34445936741823e-17	8.14733492196745e-17
2008235	8	8.27693937989456e-17	9.32717528416671e-17
2008235	9	8.46617896535442e-17	9.6551792452767e-17
2008235	10	8.72972937976439e-17	1.03575965087034e-16
2008235	11	8.71312222728573e-17	1.04611341719567e-16
2008235	12	8.58543839372105e-17	1.02533737891962e-16
2008235	13	8.44507878217913e-17	1.00237998048976e-16
2008235	14	8.22121798098735e-17	9.65059404373442e-17
2008235	15	8.00068237671571e-17	9.30591394100723e-17
2008235	16	8.05249036061182e-17	9.23279125448869e-17
2008235	17	8.15842409490473e-17	9.20388941372857e-17
2008235	18	8.43565426641815e-17	9.61908035307121e-17
2008235	19	8.70698068036384e-17	1.02673645604949e-16
2008235	20	8.78577632246299e-17	1.10228228338918e-16
2008235	21	8.45147616254048e-17	1.12431181072111e-16
2008235	22	7.0930828424065e-17	9.44426975888116e-17
2008235	23	6.48508328584085e-17	8.59331788353881e-17
2008236	0	1.15180381702282e-16	1.81017254665178e-16
2008236	1	1.14518421843269e-16	1.80585352931598e-16
2008236	2	1.16844270891779e-16	1.80884459738453e-16
2008236	3	1.14872470090378e-16	1.75127137908325e-16
2008236	4	1.13565309680218e-16	1.71835071487071e-16
2008236	5	1.13242833550144e-16	1.71580649775285e-16
2008236	6	1.14062609258616e-16	1.71200365093956e-16
2008236	7	1.12971274480362e-16	1.57917747109771e-16
2008236	8	1.09919000680559e-16	1.47592962189656e-16
2008236	9	1.08000373299913e-16	1.44093580496913e-16
2008236	10	1.07332685462776e-16	1.41272904204156e-16
2008236	11	1.06755979625119e-16	1.39408368603231e-16
2008236	12	1.0600519946348e-16	1.38987122197637e-16
2008236	13	1.03277240897795e-16	1.34986466266469e-16
2008236	14	1.04214490103513e-16	1.37028489004297e-16
2008236	15	1.09984923367018e-16	1.48147747219379e-16
2008236	16	1.13285968336234e-16	1.59241184651559e-16
2008236	17	1.13974768459407e-16	1.60282385991088e-16
2008236	18	1.19860992943164e-16	1.67997444844824e-16
2008236	19	1.18637381990321e-16	1.67927271231851e-16
2008236	20	1.17350044731798e-16	1.68358492952138e-16
2008236	21	8.18506367216478e-17	1.07271925823478e-16
2008236	22	6.3427953622646e-17	7.86972705386466e-17
2008236	23	5.10556462972146e-17	6.16313703736766e-17
2008237	0	4.11206372479445e-17	4.69081164136421e-17
2008237	1	4.08376106304657e-17	4.71720235383205e-17
2008237	2	4.84042515489037e-17	5.73447830980395e-17
2008237	3	4.9134801496423e-17	5.84302700954952e-17
2008237	4	4.1209540494457e-17	4.98737080625341e-17
2008237	5	3.44275913569914e-17	4.17644483526323e-17
2008237	6	3.42526019806748e-17	4.2778569618607e-17
2008237	7	9.19876729313543e-17	1.32442680954244e-16
2008237	8	5.63003737923975e-17	7.61691296146227e-17
2008237	9	5.7082892148039e-17	7.56739589182773e-17
2008237	10	5.71633457946428e-17	7.33242248238854e-17
2008237	11	5.57195491676168e-17	6.96655363462694e-17
2008237	12	5.73628723301614e-17	7.08829844331659e-17
2008237	13	6.16155348213479e-17	7.66138904122215e-17
2008237	14	7.72884954852124e-17	1.00282259722315e-16
2008237	15	7.85404119705252e-17	1.00705221584416e-16
2008237	16	6.9318110421925e-17	8.85209156063385e-17
2008237	17	6.17482329953736e-17	7.78873853234582e-17
2008237	18	5.9523236103798e-17	7.32044258278463e-17
2008237	19	5.80639463200471e-17	6.99553642056848e-17
2008237	20	5.67924880966445e-17	6.75208012997732e-17
2008237	21	5.54839168827085e-17	6.55058960296885e-17
2008237	22	5.47661292395152e-17	6.40803947505213e-17
2008237	23	5.4214588723626e-17	6.34541142088269e-17
2008238	0	5.38247784817676e-17	6.29964089067743e-17
2008238	1	5.33782623554814e-17	6.22676784837316e-17
2008238	2	5.26088182790201e-17	6.13490812675345e-17
2008238	3	5.15931175230744e-17	6.03186438297861e-17
2008238	4	5.02988929315947e-17	5.93548751149328e-17
2008238	5	4.89677782325929e-17	5.86830357424189e-17
2008238	6	4.93301445564121e-17	5.91198845205615e-17
2008238	7	5.12563223592001e-17	6.04434291208269e-17
2008238	8	5.20479564989938e-17	6.1199383962436e-17
2008238	9	5.20107849183143e-17	6.11954989875512e-17
2008238	10	5.24494657281602e-17	6.16814322868735e-17
2008238	11	5.35215093057931e-17	6.31645779579002e-17
2008238	12	5.37249955077229e-17	6.38564232070065e-17
2008238	13	5.25806392388178e-17	6.34340844261492e-17
2008238	14	5.11247322832744e-17	6.24103996238854e-17
2008238	15	4.87085642733112e-17	5.97695874732738e-17
2008238	16	4.59750293478558e-17	5.7033536882154e-17
2008238	17	4.4428370935985e-17	5.47723671412931e-17
2008238	18	4.35093398693285e-17	5.31607288859053e-17
2008238	19	4.24449400179388e-17	5.17367369522717e-17
2008238	20	4.14125997683988e-17	5.12393405114872e-17
2008238	21	4.44944554512313e-17	5.49645470526701e-17
2008238	22	5.03714469010983e-17	6.50016392014163e-17
2008238	23	6.0347211987973e-17	8.12259782549423e-17
2008239	0	7.16843219205631e-17	9.96420963558888e-17
2008239	1	8.23375983657575e-17	1.17227017115004e-16
2008239	2	1.13228804333538e-16	1.79786037313128e-16
2008239	3	1.12097485943192e-16	1.79800795507865e-16
2008239	4	1.09538762499992e-16	1.81071845368602e-16
2008239	5	1.03284743849499e-16	1.61348694982596e-16
2008239	6	9.78969328165692e-17	1.38515101130029e-16
2008239	7	8.99158892496805e-17	1.18672678801872e-16
2008239	8	8.21579947355672e-17	1.0462925629879e-16
2008239	9	7.58292216595494e-17	9.55868043036138e-17
2008239	10	7.10111296437313e-17	8.85317858441644e-17
2008239	11	6.79412089344026e-17	8.30337335219541e-17
2008239	12	6.7639671323631e-17	7.89000500209309e-17
2008239	13	6.85695310498725e-17	8.10074620885618e-17
2008239	14	6.792204135035e-17	8.21963360224876e-17
2008239	15	6.64507865740695e-17	8.13366125094243e-17
2008239	16	6.45904533154769e-17	8.08144157849005e-17
2008239	17	6.55604968013767e-17	8.37362794538509e-17
2008239	18	7.02745992057049e-17	9.12557098157623e-17
2008239	19	7.35258685309821e-17	9.70921304983576e-17
2008239	20	7.56812981780336e-17	9.97901308360363e-17
2008239	21	7.6810945933882e-17	1.00171914472809e-16
2008239	22	7.60488631745684e-17	9.9995099656381e-17
2008239	23	7.69147436713718e-17	1.03072495230573e-16
2008240	0	7.82360825145541e-17	1.06049476906925e-16
2008240	1	7.93724092228246e-17	1.08032497878846e-16
2008240	2	7.95118789405995e-17	1.08110185864425e-16
2008240	3	7.68069818742829e-17	1.03994740471159e-16
2008240	4	7.39475667960034e-17	9.90495221459275e-17
2008240	5	7.13595484802328e-17	9.52576440220321e-17
2008240	6	6.8654651222917e-17	9.30572114696718e-17
2008240	7	6.95801460873597e-17	9.5855192799653e-17
2008240	8	6.9931712323877e-17	9.58631840306112e-17
2008240	9	7.21916401214054e-17	9.56955808886995e-17
2008240	10	6.82213583886479e-17	9.18355943502382e-17
2008240	11	6.72596789974486e-17	8.917248737708e-17
2008240	12	6.62293737701097e-17	8.64505440134219e-17
2008240	13	6.2385346640019e-17	8.18773592705104e-17
2008240	14	5.93206687119633e-17	7.79228343935635e-17
2008240	15	5.66769935303471e-17	7.36018213164379e-17
2008240	16	5.42137021765356e-17	6.93177711764082e-17
2008240	17	5.25158615091175e-17	6.53567499083454e-17
2008240	18	5.25407372318181e-17	6.17412241859321e-17
2008240	19	5.22593031271447e-17	5.98317153281854e-17
2008240	20	5.13142022912199e-17	5.94612526744603e-17
2008240	21	5.03428995802521e-17	5.994993434054e-17
2008240	22	4.9735746545392e-17	6.06583992014622e-17
2008240	23	4.94935865048156e-17	6.15928491168838e-17
2008241	0	4.94044301558646e-17	6.20878056768292e-17
2008241	1	4.94231765309852e-17	6.22475687065787e-17
2008241	2	4.97001497448152e-17	6.21175963589278e-17
2008241	3	4.98470049191021e-17	6.17308485211431e-17
2008241	4	4.94819366768102e-17	6.13783243825971e-17
2008241	5	4.92336051332449e-17	6.08812402186727e-17
2008241	6	4.9579234997127e-17	6.09268139965833e-17
2008241	7	4.9604389654735e-17	6.05224197786737e-17
2008241	8	4.94674076989492e-17	6.00452114098927e-17
2008241	9	4.89090390196572e-17	5.947390374727e-17
2008241	10	4.8656216251068e-17	5.87293775091814e-17
2008241	11	4.77496441037606e-17	5.73350025395541e-17
2008241	12	4.62883397334748e-17	5.54074092852025e-17
2008241	13	4.43753661875274e-17	5.32943123740197e-17
2008241	14	4.2627820291129e-17	5.10084693263894e-17
2008241	15	4.0059880165466e-17	4.80465928548255e-17
2008241	16	3.79143040674685e-17	4.52816921251918e-17
2008241	17	3.63799113734687e-17	4.28246881005414e-17
2008241	18	3.49955177741e-17	4.16299750368212e-17
2008241	19	3.59668862418346e-17	4.26010441532165e-17
2008241	20	3.74393558645575e-17	4.49857676482759e-17
2008241	21	3.88342648407519e-17	4.67509750399406e-17
2008241	22	3.90294000361912e-17	4.70955922667919e-17
2008241	23	3.94020382437062e-17	4.65536435236815e-17
2008242	0	3.7902412254553e-17	4.47047553789312e-17
2008242	1	3.5081335002446e-17	4.15226406342143e-17
2008242	2	3.16033305277098e-17	3.76376535939645e-17
2008242	3	2.59009732563923e-17	3.13585595520803e-17
2008242	4	2.09648341475385e-17	2.60111355355746e-17
2008242	5	2.01624254179193e-17	2.59323782285045e-17
2008242	6	1.95994396630975e-17	2.56347591165986e-17
2008242	7	2.11939149555005e-17	2.76874261931784e-17
2008242	8	3.90357955457916e-17	5.30699797825821e-17
2008242	9	1.1970904119255e-16	1.67374564269836e-16
2008242	10	1.21604151702038e-16	1.66766799876739e-16
2008242	11	1.25285447275997e-16	1.66386995584753e-16
2008242	12	1.19732608284242e-16	1.49715514262261e-16
2008242	13	1.09546093325252e-16	1.32606546150779e-16
2008242	14	9.82680261244141e-17	1.16690590593229e-16
2008242	15	8.88007696115808e-17	1.08050519589856e-16
2008242	16	1.20781790020339e-16	1.68921988367112e-16
2008242	17	1.07762789458319e-16	1.46456985065024e-16
2008242	18	1.22887745552488e-16	1.67134510658759e-16
2008242	19	1.10896005222066e-16	1.40309154629163e-16
2008242	20	9.31305734683147e-17	1.11014218893387e-16
2008242	21	8.51427933886174e-17	9.62821531501711e-17
2008242	22	8.54227177638585e-17	9.35796816496315e-17
2008242	23	8.69391615782875e-17	9.40541272004458e-17
2008243	0	8.72784404279417e-17	9.37998873182188e-17
2008243	1	8.67039045053885e-17	9.24957215647695e-17
2008243	2	8.60264256746915e-17	9.1892037265312e-17
2008243	3	8.57535723754766e-17	9.18836094797044e-17
2008243	4	8.48075350432292e-17	9.09846318918501e-17
2008243	5	8.32726803494313e-17	8.98993015278759e-17
2008243	6	8.50426219607846e-17	9.31423915883503e-17
2008243	7	9.14116038627666e-17	1.03749632490502e-16
2008243	8	9.97353875211807e-17	1.17892711892054e-16
2008243	9	1.03947824669004e-16	1.27264089142614e-16
2008243	10	1.04925531748471e-16	1.29678213188322e-16
2008243	11	1.0614896925977e-16	1.32794613821485e-16
2008243	12	1.05873260029108e-16	1.32381767206072e-16
2008243	13	1.04963297334345e-16	1.30599060514629e-16
2008243	14	1.03674422703309e-16	1.28418235814734e-16
2008243	15	1.02083941419397e-16	1.25793251920125e-16
2008243	16	1.00586914982234e-16	1.2361540751784e-16
2008243	17	9.96431378479396e-17	1.22324920800531e-16
2008243	18	9.97521683992693e-17	1.20822456845368e-16
2008243	19	9.88869955735338e-17	1.15944706097155e-16
2008243	20	9.78971130630915e-17	1.12017893543879e-16
2008243	21	9.6927003029238e-17	1.09445423020568e-16
2008243	22	9.6182685676655e-17	1.07491519467987e-16
2008243	23	9.5139886534223e-17	1.05824582910192e-16
