# Supplementary material for: A comparison of sea salt emission parameterizations in northwestern Europe using a chemistry transport model setup
Source: Copernicus journal article supplement (doi:10.5194/acp-16-9905-2016), 2016-08-08
Supplement: Supplementary file 2 [file acp-16-9905-2016-supplement.zip › conc/conc.timeseries.values.sum2008.zero.Na.moreStations.csv]

doy	hour	DE0001R	DE0002R	DE0003R	DE0007R	DE0009R	DE0044R	DK0003R	DK0005R	DK0008R	DK0031R	FI0009R	FI0017R	NO0001R	NO0056R	PL0002R	PL0003R	PL0004R	SE0014R	NL0011R
2008183	0	1.01061894124927e-16	5.30993110753478e-17	5.22660269490892e-17	5.47212379385966e-17	1.08662490416243e-16	5.52740361943667e-17	8.08246698221847e-17	1.10007416739094e-16	1.04444830608976e-16	7.82304831839638e-17	9.95321024754729e-17	7.52190934284927e-17	6.26306323599851e-17	6.26048972122871e-17	6.07978805045221e-17	5.20095795985945e-17	1.09198088971142e-16	7.81552704557857e-17	5.40640394436716e-17
2008183	1	9.80383314845121e-17	5.24237137343736e-17	5.18880412844115e-17	5.40580717667647e-17	1.09152338830699e-16	5.47530204316588e-17	7.70802202477998e-17	1.11036077915493e-16	9.96336910319622e-17	7.00769128754962e-17	8.03180679371742e-17	7.31370594914495e-17	6.24524629511777e-17	6.15934585430672e-17	6.14751425246027e-17	5.15776046416723e-17	1.1048812323279e-16	6.85944649912695e-17	5.45699173502064e-17
2008183	2	9.61774217836375e-17	5.18803278535306e-17	5.11893462560827e-17	5.35450023273499e-17	1.09760616221505e-16	5.34581229466959e-17	7.14987471608496e-17	1.11882189494246e-16	9.32222929241846e-17	6.28883482045308e-17	9.13114784382604e-17	7.0476026957627e-17	6.37645522611423e-17	5.4229538293804e-17	6.20722037820119e-17	5.11393825227153e-17	1.09617794779667e-16	6.20692874860616e-17	5.50874724538171e-17
2008183	3	9.52621034942484e-17	5.16509767346933e-17	5.05426865660487e-17	5.30731526519061e-17	1.10255743085146e-16	5.2241918963127e-17	6.52881814966746e-17	1.12244663532812e-16	8.47342185334184e-17	5.81815886054714e-17	9.82090748885672e-17	6.92244285821716e-17	6.48964515547435e-17	4.84418524686452e-17	6.24409928882579e-17	5.11138018026065e-17	9.35461442062014e-17	5.83175606075174e-17	5.58696712472791e-17
2008183	4	9.48330052933216e-17	5.14409432979809e-17	5.01877603268283e-17	5.25681206617385e-17	1.11239262276133e-16	5.1163572618627e-17	6.12188768707442e-17	1.12715252758219e-16	7.66258670675514e-17	5.46392031786561e-17	1.12831728127463e-16	6.84768776499832e-17	6.70935372855756e-17	4.50534999929839e-17	6.42669690888759e-17	5.16314118736652e-17	8.79241816287146e-17	5.62145564257801e-17	5.66866165314039e-17
2008183	5	9.44121165442162e-17	5.08767105344667e-17	5.20633534240421e-17	5.16493601523975e-17	1.12793705536747e-16	5.20565967712076e-17	5.8317810102859e-17	8.55831794314194e-17	6.92944277100473e-17	5.33416960986574e-17	1.19152001342953e-16	7.79920490185289e-17	6.99435227324141e-17	4.27650861425931e-17	6.99613547784585e-17	5.19386105561083e-17	1.07997897873598e-16	5.44108657101121e-17	6.03931098534112e-17
2008183	6	9.38421383745076e-17	5.75374543827343e-17	5.50191233616671e-17	5.81854162557749e-17	1.13550834693838e-16	5.44275469259212e-17	5.59605168084887e-17	8.03620123215108e-17	6.30426673905958e-17	5.38852251505144e-17	1.19948410865705e-16	1.1749575500392e-16	7.08508797951478e-17	3.97922700437676e-17	7.55617857451648e-17	6.1560200649875e-17	1.08353218793362e-16	5.34974125521802e-17	6.72387996748419e-17
2008183	7	9.27674240981812e-17	6.02847622012765e-17	6.64160315435462e-17	6.40697142028355e-17	1.13797272225066e-16	5.49966615687662e-17	5.25916686785617e-17	7.91441208563907e-17	5.73950016669769e-17	5.37454071800979e-17	1.20263933803422e-16	1.19248546327972e-16	6.42926783186134e-17	3.53056323965954e-17	8.57880021083672e-17	7.25613678389608e-17	1.08625605692815e-16	5.2697496274948e-17	7.11769745088132e-17
2008183	8	9.09092867064938e-17	5.92138596195529e-17	1.23293665711263e-16	6.52042973079652e-17	1.031742776084e-16	6.20424941597445e-17	4.8910294196064e-17	8.05462255613887e-17	5.31794752102111e-17	5.25119592205175e-17	1.17884747809693e-16	1.21093865998648e-16	5.54366344999256e-17	1.21257776038088e-16	8.47218957863566e-17	6.83347863566089e-17	1.09248779899991e-16	5.14052238441949e-17	6.93026441995399e-17
2008183	9	8.91761202870806e-17	5.67430626341223e-17	1.17005714053767e-16	6.71750522753385e-17	9.69486920871296e-17	6.50139843885933e-17	4.58195314160518e-17	8.18337706287832e-17	5.00119758698401e-17	5.10412600488531e-17	1.16681289211371e-16	1.1686337626971e-16	4.74720539999169e-17	8.45502524641405e-17	8.2210205467128e-17	6.39154985130908e-17	1.09940192823036e-16	4.96147224941955e-17	6.21638922762213e-17
2008183	10	8.78339371416159e-17	5.57226611402313e-17	1.09959355281507e-16	7.33773176029798e-17	9.30876882783743e-17	5.98297739248935e-17	4.32675757507435e-17	8.12237203614142e-17	4.76826720629166e-17	5.04968707348351e-17	1.16754426381818e-16	1.17633063897808e-16	4.11736803705502e-17	8.13139654505294e-17	8.05157218624034e-17	5.92323257815164e-17	1.09952177135763e-16	4.76552561436177e-17	5.64860910051142e-17
2008183	11	8.7183858073983e-17	5.31610898816819e-17	1.03543228664275e-16	7.58773240721145e-17	9.03475347197987e-17	5.49873498668472e-17	4.12179352343063e-17	8.01438192685191e-17	4.5920778109927e-17	4.97246661554851e-17	1.16987529794145e-16	1.21504387839286e-16	3.66774340909645e-17	7.49457584957481e-17	7.90635415415314e-17	5.46347065076017e-17	1.10541364963341e-16	4.56997179412008e-17	5.19803258277148e-17
2008183	12	8.68797401610202e-17	4.94480182552287e-17	9.37833472564575e-17	7.51793096971613e-17	8.72311882011011e-17	4.97415526555233e-17	4.02171349304975e-17	7.89250263039818e-17	4.45159514411247e-17	4.90084161842524e-17	1.15962670808624e-16	1.22144715370215e-16	3.33426463037178e-17	6.51839153887326e-17	7.66719905123353e-17	4.99326591543013e-17	8.8852972818152e-17	4.3910099235436e-17	4.75052695637978e-17
2008183	13	8.59612862846834e-17	4.56735568334177e-17	8.38877963413769e-17	7.29626932153462e-17	8.48231671130876e-17	4.4518446888136e-17	3.91369718174359e-17	7.73624808484263e-17	4.33664905524528e-17	4.83936605079292e-17	1.13925424282079e-16	1.22110420232506e-16	3.090742146845e-17	5.4960565116709e-17	7.46267314153781e-17	4.5659029035138e-17	7.74886348516633e-17	4.23812988662442e-17	4.33779301008553e-17
2008183	14	8.34019412780568e-17	4.22839689886874e-17	7.54849311928317e-17	7.05847958651409e-17	8.11394238439147e-17	3.99123495612164e-17	3.81538643029495e-17	7.53479317147848e-17	4.25031163267927e-17	4.78541205084186e-17	1.04964864005329e-16	1.09037204652891e-16	2.92611823895489e-17	4.68238305744905e-17	7.17215181008059e-17	4.2150880727692e-17	6.87518369166888e-17	4.09496615083987e-17	3.91731837811225e-17
2008183	15	7.89740852956167e-17	3.92700060783288e-17	6.88437409205349e-17	6.82274657966515e-17	7.5988072852024e-17	3.63921163660769e-17	3.72731901004437e-17	7.4329378407648e-17	4.18186209022669e-17	4.71528617304062e-17	1.0180249563229e-16	9.90988475214188e-17	2.83454068607636e-17	4.08639359349406e-17	1.06360033754743e-16	3.92495564189566e-17	6.09693676039411e-17	3.97487435230147e-17	3.59297623496878e-17
2008183	16	7.80971701784173e-17	1.22756951658723e-16	6.36560743595264e-17	6.38824036181978e-17	7.10936588826649e-17	3.35652041875269e-17	3.64930422713684e-17	7.43875844916356e-17	4.12581082820569e-17	4.60096012189549e-17	9.86229593769105e-17	9.7928049422152e-17	2.78599168231055e-17	3.66003663067403e-17	1.13457020543686e-16	3.71626564139369e-17	5.47773779398883e-17	3.88902926621273e-17	3.2830763282175e-17
2008183	17	7.73396242717145e-17	7.46520393697615e-17	5.82094163735937e-17	5.82361236062333e-17	6.82069815047475e-17	3.14147535005448e-17	3.58111078881044e-17	7.4238752191907e-17	4.08550756166864e-17	4.44644893417574e-17	9.52341200957673e-17	1.02104623299444e-16	2.77645127187176e-17	3.35044931058005e-17	1.16014861964589e-16	3.58252513154419e-17	5.04066155768918e-17	3.80720322698826e-17	2.98190802167105e-17
2008183	18	7.39847263788299e-17	5.48664040212089e-17	5.35426205060862e-17	5.18426487410046e-17	6.52775682403002e-17	2.9729976526609e-17	3.60979731027823e-17	7.2714799630422e-17	4.02654606121309e-17	4.39382230949963e-17	9.19675317369675e-17	1.0144818340481e-16	2.81086107912614e-17	3.13471128582049e-17	1.09343943761052e-16	3.37117741712608e-17	4.77827031693871e-17	3.72819393727734e-17	2.71141051586899e-17
2008183	19	6.80922326030746e-17	4.86821900364495e-17	4.79224233310719e-17	4.51931974387835e-17	6.35449933579662e-17	2.90300365958771e-17	3.52406774434682e-17	7.20478518658355e-17	3.94683110043394e-17	4.09871269887071e-17	8.79571500732679e-17	9.83113320355215e-17	2.90662312149815e-17	3.03216761330952e-17	8.33529603754645e-17	3.21828092828766e-17	4.60239377481766e-17	3.63247751357763e-17	2.53921597633481e-17
2008183	20	6.08449053137556e-17	4.46191431456811e-17	4.52736912301484e-17	4.20288330038933e-17	6.16154920270406e-17	3.07712502573022e-17	3.4327032078498e-17	7.11952684123034e-17	3.80805129348549e-17	3.78324858625257e-17	8.19067906915896e-17	9.45146899505468e-17	2.97795743877055e-17	3.00323669323156e-17	7.72178413853567e-17	3.17229515561595e-17	4.44290666612681e-17	3.54853992522832e-17	2.42552997949657e-17
2008183	21	5.51450621099472e-17	4.1970743363376e-17	4.36838267588399e-17	4.08378158937784e-17	5.95256049985271e-17	3.45466353138797e-17	3.49671659037062e-17	6.82754593022958e-17	3.65525289909976e-17	3.6239761234577e-17	7.58557981328095e-17	9.20179923432356e-17	3.01010500725585e-17	2.96978389264965e-17	7.42618653583024e-17	3.1775316713955e-17	4.3072388338991e-17	3.422247048258e-17	2.3699347771955e-17
2008183	22	5.49418742570866e-17	4.19333842322763e-17	4.24423150665397e-17	4.26122473131669e-17	5.85027399068509e-17	3.91482810366972e-17	3.6154895280039e-17	6.5384726049568e-17	3.58131925401099e-17	3.57733250158324e-17	7.08912712108786e-17	9.08775053085644e-17	3.01930666713301e-17	2.8992774411881e-17	7.23642323130371e-17	3.22546659087693e-17	4.19113579126495e-17	3.26729400899114e-17	2.37359670323296e-17
2008183	23	5.63043478175663e-17	4.25185273115894e-17	4.16503103627144e-17	4.44868187050152e-17	5.77432526717338e-17	4.37790912047499e-17	3.69743207676122e-17	6.41028228487712e-17	3.57573031690505e-17	3.56071564427111e-17	6.60794785082962e-17	8.97782160001588e-17	3.02729678845573e-17	2.84657510026054e-17	7.09247428461751e-17	3.35503472768498e-17	4.11758113785523e-17	3.13864885400545e-17	2.38380448573031e-17
2008184	0	5.60818515797446e-17	4.27652128738338e-17	4.71944308267928e-17	4.62556198448346e-17	5.64476004275226e-17	4.68038897830182e-17	3.74667776535567e-17	6.04216335388914e-17	3.55484334760191e-17	3.69964767532039e-17	7.06346688036129e-17	8.86360695458344e-17	3.0396672471498e-17	2.81533564721594e-17	6.8943727890581e-17	3.45290101226321e-17	4.07239246002721e-17	3.12986748713949e-17	2.41497647051628e-17
2008184	1	5.27586475074313e-17	4.32713181215551e-17	4.82700554813059e-17	4.760506836305e-17	5.51180347429137e-17	4.68325430731815e-17	3.77854813727609e-17	5.67795016168469e-17	3.5363365126153e-17	3.93884399715834e-17	7.69590841563292e-17	8.74812307667269e-17	3.04936514911106e-17	2.79765420235641e-17	6.67732215141335e-17	3.58100050403783e-17	4.03198062660284e-17	3.07266110676334e-17	2.46313876583e-17
2008184	2	4.75812806256325e-17	4.44754771280204e-17	4.95345659911677e-17	4.83970393030077e-17	5.25656810457586e-17	4.44447711912999e-17	3.80792185796298e-17	5.39451099654839e-17	3.4079839195734e-17	4.13368338999418e-17	8.12261774225406e-17	8.64964454006424e-17	3.06858531583895e-17	2.78581713552669e-17	6.50220252888938e-17	3.72113327652935e-17	3.9868084137911e-17	3.01777192380197e-17	2.52079364804817e-17
2008184	3	4.3406772375671e-17	4.58418614092791e-17	5.15560809837075e-17	4.87091454685787e-17	5.3125228629491e-17	4.16878319506605e-17	3.78169869720031e-17	5.23552834731322e-17	3.30103896426081e-17	4.1505138893776e-17	8.00616811827017e-17	8.60456658256567e-17	3.06946845573535e-17	2.77620492763085e-17	6.34475319508528e-17	3.85684122851381e-17	3.87541598609391e-17	3.00920124270746e-17	2.57762225476258e-17
2008184	4	4.03501259396468e-17	4.72188504089177e-17	5.53156135137181e-17	4.88909813252665e-17	5.16281564094727e-17	3.95466360018745e-17	3.74408404578723e-17	5.16834633509497e-17	3.2251479548744e-17	4.05615343644669e-17	7.82913135303125e-17	8.55312196993688e-17	3.10384983927283e-17	2.75916508519203e-17	6.20639647426565e-17	3.96207261845102e-17	3.67226448947176e-17	3.16837871897333e-17	2.63264360762412e-17
2008184	5	3.88029655116597e-17	4.85801917305922e-17	5.88175132290681e-17	4.95970355367344e-17	5.29032229482049e-17	3.8622929345113e-17	3.754047861625e-17	5.12297339506045e-17	3.18256875309045e-17	4.29723190501595e-17	7.49265233845464e-17	1.19855957683243e-16	3.10964658612805e-17	2.88110850908165e-17	5.97949844527559e-17	4.5456846284279e-17	3.65330185133334e-17	3.23068241923476e-17	2.69060255296056e-17
2008184	6	3.87166992841983e-17	4.7658608938645e-17	6.43168453079678e-17	5.06409693899215e-17	5.22272150833957e-17	3.92674582430334e-17	3.81123173173535e-17	5.04858618983909e-17	3.23458576121675e-17	4.20747448125184e-17	7.14269371395422e-17	9.2370919644104e-17	3.28110292369191e-17	3.4415222037004e-17	7.36360595089858e-17	4.99846246161397e-17	3.72949826741019e-17	3.2866327768982e-17	2.93911802548712e-17
2008184	7	3.9239254090222e-17	4.57153898135014e-17	6.48877020184935e-17	4.99745232862679e-17	5.18708183676548e-17	3.9738610673446e-17	4.06169754179852e-17	4.9507275862525e-17	3.23471696395226e-17	4.09606779603947e-17	6.84697797897448e-17	8.25294234723369e-17	3.51458055919423e-17	3.92144760414182e-17	8.04545820521258e-17	4.90090754146034e-17	3.85768996939097e-17	3.33681428286279e-17	3.22811178496186e-17
2008184	8	3.94910172726199e-17	4.35549882502908e-17	6.22929919168342e-17	5.05732194214248e-17	5.10325144407461e-17	4.09354722772468e-17	4.09776892483592e-17	4.86934876187639e-17	3.23830500510668e-17	3.86874585147994e-17	6.61975502827693e-17	1.20583344200133e-16	3.60099306283768e-17	3.82488065990335e-17	8.84003391810108e-17	4.63865612000111e-17	3.87673263424628e-17	3.44537207210322e-17	3.35353515454069e-17
2008184	9	3.99920264847546e-17	4.27301657925431e-17	5.45529248283867e-17	5.45914272341081e-17	4.99132102293214e-17	4.58296461527176e-17	4.14894882486083e-17	4.84431929031401e-17	3.24159542000999e-17	3.70925587859218e-17	6.75247507506367e-17	1.16107716937408e-16	3.50224999316665e-17	3.62284601060316e-17	7.92896958274238e-17	4.39865862454126e-17	3.92431874391744e-17	3.47248520816629e-17	3.53806778838969e-17
2008184	10	4.06015089102792e-17	3.93069757839805e-17	5.18417770709042e-17	4.88470804474722e-17	4.89667757298639e-17	4.51130948889299e-17	4.12059555106402e-17	4.85903448834517e-17	3.21900048958446e-17	3.77434057652726e-17	6.81392457894486e-17	1.07451204426044e-16	3.5610755293756e-17	3.42192797481636e-17	7.18952660089139e-17	4.09665697910554e-17	4.00515805327039e-17	3.47183601049786e-17	3.65166531931234e-17
2008184	11	4.0299815155783e-17	3.51525030881605e-17	6.04161608273243e-17	4.2913019011306e-17	4.78450598371328e-17	4.1737718966775e-17	4.10918760968894e-17	4.81583970903904e-17	3.19634917087587e-17	3.84188144019767e-17	7.06241295606015e-17	1.00203342401655e-16	3.55648083984254e-17	3.24485728583802e-17	6.49002526425132e-17	3.8816892114448e-17	4.10477860740276e-17	3.43164768235355e-17	3.75800139530615e-17
2008184	12	3.85009479820432e-17	3.20684014737208e-17	1.18303909563145e-16	3.8041177367341e-17	4.61191914336569e-17	3.82076034727861e-17	4.12606309816662e-17	4.68335441487862e-17	3.14045205006447e-17	3.86452237345077e-17	6.95030328628024e-17	9.62006189772839e-17	3.57740856959997e-17	3.0990037327968e-17	6.05094848943832e-17	3.70088117339281e-17	4.2122313838356e-17	3.33869211673607e-17	3.91646134172905e-17
2008184	13	3.61971994896423e-17	2.98524767200183e-17	1.16850021627499e-16	3.38135986596492e-17	4.42145621069229e-17	3.5584836725969e-17	4.04602361578325e-17	4.41981750588495e-17	3.03065338510413e-17	3.68321552246764e-17	6.75622915917216e-17	9.49302834592228e-17	3.59378705712608e-17	2.98272180217291e-17	5.77169606376789e-17	3.59373559866703e-17	4.40867743136986e-17	3.19087901596101e-17	5.48197552444424e-17
2008184	14	3.3906317646939e-17	2.84333460144206e-17	1.09357532942574e-16	2.98462563081957e-17	4.23585879334427e-17	3.330593284839e-17	3.87091382121695e-17	4.16813652833686e-17	2.9342259726377e-17	3.44099805056395e-17	6.93369678307847e-17	1.21965979077696e-16	3.59684782819567e-17	2.8892472977327e-17	5.58407329364775e-17	3.51489624520314e-17	4.72854361721522e-17	3.04869428290081e-17	1.19862844704948e-16
2008184	15	3.20243010559e-17	2.75864292852434e-17	9.92463741060729e-17	2.62793103587036e-17	4.06812039167014e-17	3.12686657787092e-17	3.71312017862872e-17	3.9340703477186e-17	2.96594496102714e-17	3.26160320933245e-17	7.0774653414341e-17	1.19590350455726e-16	3.53444776257396e-17	2.79607709035727e-17	5.47248610943954e-17	3.43449226528102e-17	5.11321187271098e-17	2.89677455390193e-17	9.34522447820483e-17
2008184	16	3.05901436661783e-17	2.70958699405232e-17	8.87958282622783e-17	2.33612836273075e-17	3.92955170474581e-17	2.97345174176066e-17	3.57174794285804e-17	3.7676607840251e-17	2.96886684052323e-17	3.15867784770536e-17	6.98637902676611e-17	1.1468645566539e-16	3.47547649388938e-17	2.69975923146828e-17	5.81303588725448e-17	3.34313139695792e-17	5.43416411630799e-17	2.78975590499089e-17	7.62620724881784e-17
2008184	17	2.95070869654719e-17	2.66176774221221e-17	7.77899838324709e-17	2.18776594736035e-17	3.7802341024808e-17	2.82435748859259e-17	3.39799748226664e-17	3.63124781573349e-17	2.96011057347664e-17	3.11220750954096e-17	7.19376477219841e-17	1.10422532209017e-16	3.43467315066624e-17	2.59824073324399e-17	7.08914923668714e-17	3.2715689446772e-17	5.56419825628135e-17	2.73142159464936e-17	5.78289827101877e-17
2008184	18	2.87896107345687e-17	2.58192689252698e-17	6.77434126237365e-17	2.15442893813826e-17	3.6602617857958e-17	2.63865130098833e-17	3.22987800742835e-17	3.5217553740715e-17	2.87165070856346e-17	3.07956217347808e-17	1.18243423913897e-16	1.06911591014044e-16	3.4006107721312e-17	2.47960926914545e-17	8.20325043030766e-17	3.15536917040159e-17	5.57152298329098e-17	2.70076553052036e-17	4.66332904822658e-17
2008184	19	2.85203018767344e-17	2.43628993942905e-17	5.82922138680227e-17	2.18787284203253e-17	3.63950346189239e-17	2.43504412901908e-17	3.08154403667836e-17	3.44848822901621e-17	2.77755527829208e-17	3.07726383802232e-17	1.19872876923697e-16	1.02830931300065e-16	3.45086795576436e-17	2.28744883867275e-17	7.9004616467126e-17	3.06916317575991e-17	5.6654954776748e-17	2.65867370414832e-17	4.59071697501774e-17
2008184	20	2.83743060552479e-17	2.25802290362551e-17	5.21724064857098e-17	2.32902243400378e-17	3.67979172255884e-17	2.33853585241961e-17	3.01920232794003e-17	3.36887475796536e-17	2.8047819131833e-17	3.04435334401809e-17	1.20608076517323e-16	9.9089763111901e-17	3.46228212382938e-17	2.13998588319098e-17	6.92011826973708e-17	3.05504860774636e-17	5.82786016125416e-17	2.75009839037789e-17	4.88521400962254e-17
2008184	21	2.77775042487435e-17	2.10995627144441e-17	4.86722360902941e-17	2.496380015992e-17	3.73339614458857e-17	2.35397697566593e-17	3.03725733079823e-17	3.30026773572606e-17	2.94163904932365e-17	3.02688180489662e-17	1.20609331191747e-16	9.56135765895351e-17	3.43976592521102e-17	2.04734439620829e-17	6.0907308738767e-17	3.06698140487655e-17	5.97906457978958e-17	2.62946548806321e-17	5.28287142120905e-17
2008184	22	2.6857997850759e-17	2.04899098807783e-17	4.9529999832989e-17	2.64604031407011e-17	3.7529636850429e-17	2.48683696329804e-17	3.10678612806073e-17	3.28989065156048e-17	3.18349291865852e-17	3.05479816232105e-17	1.20201238770831e-16	9.49128086858226e-17	3.41174808924367e-17	1.99074165930454e-17	5.79411279899512e-17	3.16292727255826e-17	6.10283078138809e-17	2.55068544708652e-17	5.93835925722717e-17
2008184	23	2.59310023968265e-17	2.06223965726723e-17	4.84221959218969e-17	2.77677320652258e-17	3.71204498883973e-17	2.63385742647657e-17	3.20645963856267e-17	3.31181227197757e-17	3.52304969906712e-17	3.09799467709256e-17	1.20228940956137e-16	1.12133883803654e-16	3.3417437137418e-17	1.94979983339004e-17	5.73976897503175e-17	3.15525917514575e-17	6.21219323092513e-17	2.62675350676327e-17	1.04721802267414e-16
2008185	0	2.53328952883444e-17	2.13312003744636e-17	5.01038163065437e-17	2.89572241242759e-17	3.62302437704861e-17	2.7797779740166e-17	3.32569283047911e-17	3.33379363149439e-17	3.9446699537779e-17	3.12605383570974e-17	1.18883432729583e-16	1.12041824562285e-16	3.2751596279771e-17	1.91521639982588e-17	5.69561452037303e-17	3.17783027763678e-17	6.24699053638125e-17	2.78436914712403e-17	1.11118522612994e-16
2008185	1	2.5324124001776e-17	2.24214773031155e-17	5.06595857768241e-17	2.98555121924112e-17	3.54106699082382e-17	2.96617749939701e-17	3.48025777051428e-17	3.32759652495047e-17	4.41742747828678e-17	3.18710494292485e-17	1.16666207436163e-16	8.62908118197755e-17	3.22540021702321e-17	1.88368549247064e-17	5.64695181472024e-17	3.22894329641627e-17	6.23938732717645e-17	3.01208472076449e-17	6.82252967044307e-17
2008185	2	2.57499132563648e-17	2.37323912982961e-17	5.1258820674078e-17	3.06742837282461e-17	3.50083743284359e-17	3.10347136754341e-17	3.66492914822995e-17	3.28561712079884e-17	4.91014163875311e-17	3.29215384410753e-17	1.18511055942806e-16	4.15815948401917e-17	3.18489966229987e-17	1.85200511591466e-17	5.56049628997497e-17	3.27505803154068e-17	6.16591279075812e-17	3.22764731509322e-17	1.08732870508449e-16
2008185	3	2.63799443105764e-17	2.5227472192527e-17	6.36629017748082e-17	3.14668790816911e-17	3.52525075067136e-17	3.2221588175804e-17	3.8537641711651e-17	3.2482294059856e-17	5.35101709955871e-17	3.4263096153365e-17	1.20064113523232e-16	7.57269545506123e-17	3.14039238422069e-17	1.81380944366777e-17	5.46723207230486e-17	3.31851984416397e-17	6.10195502023507e-17	3.50059957353609e-17	1.03021659004636e-16
2008185	4	2.69560183027987e-17	2.69409257637741e-17	7.10062527071022e-17	3.22434164370464e-17	3.63753260147927e-17	3.41287013000646e-17	4.03925009446348e-17	3.24193839513858e-17	5.75218522876367e-17	3.5786322742089e-17	1.20537867877001e-16	1.11466026770417e-16	3.08038985952353e-17	1.76403430918473e-17	5.37108239143708e-17	3.37995359534745e-17	6.0385772272404e-17	3.81036829142928e-17	9.758766800526e-17
2008185	5	2.74311604673196e-17	2.85008140752332e-17	7.76853821843706e-17	3.29743683740033e-17	3.81154025616843e-17	3.79011270868087e-17	4.1734476504942e-17	3.27663756563833e-17	6.08754691215698e-17	3.69135217653337e-17	1.21223918502293e-16	1.20359107667338e-16	3.01259864893877e-17	2.21496815553661e-17	5.330913865207e-17	3.47064787629815e-17	6.03687453472973e-17	4.25140340804554e-17	7.79510503913078e-17
2008185	6	2.77338815293019e-17	2.97778441175199e-17	1.08051154847205e-16	3.32282949716277e-17	4.04840985499203e-17	4.17334889922936e-17	4.24849230835852e-17	3.37869924375586e-17	6.29591960682728e-17	3.72719126350381e-17	1.20903393851815e-16	1.20851706728032e-16	2.98140945891821e-17	1.22423531636139e-16	5.47459947786871e-17	4.20221883115748e-17	5.92635438122951e-17	4.74205143734354e-17	6.23426493688147e-17
2008185	7	2.80400620046205e-17	3.18485279809749e-17	1.05255097783374e-16	3.38564519206624e-17	4.28539231762353e-17	4.32865357423016e-17	4.31313069276123e-17	3.53623740635336e-17	6.30393641306289e-17	3.75533298698981e-17	1.21063380030815e-16	9.47759484185299e-17	3.03489744779844e-17	1.22908958983398e-16	5.5973917172164e-17	5.06320075609205e-17	6.01192826481697e-17	4.9592296114144e-17	3.4252518413715e-17
2008185	8	2.8593101041692e-17	3.42008467286319e-17	1.08622109952932e-16	3.52482421375107e-17	4.50681340263665e-17	4.4899561996444e-17	4.37186373938391e-17	3.71722069193782e-17	6.09414345884144e-17	3.7435097415965e-17	1.2104164058204e-16	6.57767823980368e-17	3.71977635542094e-17	1.17482824339917e-16	7.88502006104763e-17	5.3975595547744e-17	6.11655393791884e-17	5.06639765912725e-17	1.66353721630643e-17
2008185	9	2.9824501243109e-17	3.61537832977367e-17	1.09725157372977e-16	3.64904355074015e-17	4.71074833967724e-17	4.83979886611946e-17	4.44379803110786e-17	3.9031704953979e-17	5.63578157593723e-17	3.71956647909048e-17	1.20182108184587e-16	8.30092936799116e-17	1.20188525837511e-16	1.04734681836611e-16	7.5355617698544e-17	5.41610534047492e-17	6.30609725076643e-17	4.9053654605707e-17	2.31485333373603e-17
2008185	10	3.08382040610208e-17	4.12426417335598e-17	8.76660688777395e-17	3.69943002419651e-17	4.94665496524572e-17	5.40708479005915e-17	4.47265646655909e-17	4.05036126939382e-17	5.2244025057485e-17	3.72187124961431e-17	9.84858722988205e-17	1.08395908133e-16	5.64431533906234e-17	9.51515681638498e-17	7.12768264728569e-17	5.07517727756054e-17	6.52411750360793e-17	4.68263124039748e-17	3.48625604935006e-17
2008185	11	3.13996763851544e-17	4.47958379283398e-17	6.25365942259085e-17	3.54926009023747e-17	5.17048466881827e-17	5.20009802428771e-17	4.45978235988147e-17	4.19145574289914e-17	4.89377109663646e-17	3.73247888571754e-17	1.17795616029141e-16	1.08080754326568e-16	8.51426173612185e-17	8.51003646834832e-17	6.81593284814445e-17	4.70999311056803e-17	6.82172714992069e-17	4.49676243994906e-17	4.66515066474874e-17
2008185	12	3.1367973093469e-17	6.99339936685055e-17	9.68996780052819e-17	3.32777301138365e-17	5.31725527105464e-17	4.98289839447967e-17	4.41609744259886e-17	4.33729010650995e-17	4.64589335237364e-17	3.71979432298558e-17	1.088718133749e-16	1.0715764719355e-16	4.99086937847076e-17	7.5115553897487e-17	6.54228398465595e-17	4.46280977886847e-17	7.10731292539634e-17	4.31777598255488e-17	5.71202173336442e-17
2008185	13	3.19377579258702e-17	1.20582002993508e-16	6.21502973535679e-17	3.11070858417119e-17	5.37852830793495e-17	4.79731319606084e-17	4.39150916984217e-17	4.51653208017718e-17	4.46956719761411e-17	3.73549638117086e-17	1.08159972819217e-16	6.32901600269521e-17	4.2887549449315e-17	6.90754261775455e-17	6.27713638601505e-17	4.32085142623868e-17	7.41029060495458e-17	4.16833929793456e-17	6.47936888606555e-17
2008185	14	3.46329592481557e-17	1.22715007588693e-16	5.54355637110979e-17	2.95311209715185e-17	5.41150538600525e-17	4.64227543363371e-17	4.39058825569142e-17	4.68220597190578e-17	4.37011686655765e-17	3.78482688889075e-17	1.06945840094136e-16	3.54654764263532e-17	4.36658801127035e-17	6.61336305473358e-17	6.04544437102518e-17	4.18597908216449e-17	7.71407679516167e-17	4.12418700204431e-17	6.88196805396617e-17
2008185	15	4.19507769353836e-17	1.1818403353578e-16	3.82821301871708e-17	2.79856003394564e-17	5.49608406380393e-17	4.4940625352341e-17	4.40496820579023e-17	4.83503532961798e-17	4.3530922683226e-17	3.8426913265265e-17	1.06595678409339e-16	2.91436716772255e-17	4.55800002385851e-17	6.25723891264742e-17	1.25779621313822e-16	4.0228902846116e-17	7.99784179375826e-17	4.21775282897113e-17	7.30846725350162e-17
2008185	16	5.26307581290912e-17	1.08323682819194e-16	3.73866038760776e-17	2.63776709020323e-17	5.6007382094065e-17	4.42661947915843e-17	4.46282689869257e-17	5.00723754114742e-17	4.42062598191556e-17	3.91801815676183e-17	1.06462751726616e-16	3.25711517600777e-17	4.79572721853726e-17	5.83239474008043e-17	1.31272751319746e-16	3.88897144676835e-17	8.25759421261077e-17	4.36463378514271e-17	7.43274028526807e-17
2008185	17	5.88300812702661e-17	8.7339137301147e-17	4.07427551780096e-17	2.4917109890981e-17	5.76970213598821e-17	4.51307902486126e-17	4.57740412459353e-17	5.19930268978452e-17	4.54764490321763e-17	4.03495762305193e-17	1.06732606036333e-16	1.11162073843129e-16	5.01227998390643e-17	5.57259349644214e-17	1.32246029247885e-16	3.80408462918854e-17	8.5467477215489e-17	4.5403854995208e-17	7.35852318592343e-17
2008185	18	6.02184252617771e-17	7.90302964016846e-17	4.93865793901704e-17	2.54733926887915e-17	6.00125862911601e-17	4.62818044420815e-17	4.67902924286945e-17	5.39573873571812e-17	4.68082034221593e-17	4.20275065913211e-17	1.07378975871279e-16	1.11745878678753e-16	5.16128548181652e-17	5.42088782038156e-17	1.28948509183407e-16	3.63793479201165e-17	9.00142593071437e-17	4.71093427149617e-17	7.07816927827172e-17
2008185	19	5.9005659284205e-17	7.62938319884254e-17	3.95606158411506e-17	2.86512344465302e-17	6.26162878267298e-17	4.61624052946733e-17	4.85945584285417e-17	5.60293496605751e-17	4.80157313632441e-17	4.43233690237291e-17	1.07619810172395e-16	1.11702654939959e-16	5.1686508688534e-17	5.25192783383782e-17	1.16206983713601e-16	3.48312283084748e-17	9.38844762847092e-17	4.89719279572001e-17	6.71048091613365e-17
2008185	20	5.13643608346115e-17	9.99087449440909e-17	2.56810418920973e-17	3.19936641560272e-17	6.52903632979629e-17	4.77307576029959e-17	5.04147944534332e-17	5.80109756061919e-17	4.91794105347874e-17	4.66834736426861e-17	1.0797502857402e-16	1.11924721245229e-16	5.08367249975159e-17	5.11833239597165e-17	1.02202123555342e-16	3.47931884782703e-17	9.53115770408342e-17	5.05303057793456e-17	6.49822459783246e-17
2008185	21	4.56686464874028e-17	8.70877285364975e-17	2.36969887709652e-17	3.47438303365374e-17	6.75069155047968e-17	4.77098379679537e-17	5.27687694692188e-17	6.02413456559633e-17	5.03787944092548e-17	4.90245659656519e-17	1.07867992797673e-16	1.1200619600525e-16	5.30941505116755e-17	5.2238496893939e-17	8.86497183347448e-17	3.54690265788187e-17	9.70496546482963e-17	5.17662380418124e-17	1.09296755295497e-16
2008185	22	4.42870532368254e-17	7.60551964438318e-17	3.13208501720985e-17	3.73513884456656e-17	6.95116479263469e-17	4.64736701978633e-17	5.5581806607357e-17	6.22119551711682e-17	1.11886180220954e-16	5.18250954556873e-17	1.07644161072921e-16	1.11443461697858e-16	5.32927967522902e-17	5.54485279283165e-17	7.71043080586281e-17	3.64634166841089e-17	9.84238480788043e-17	5.33360428548715e-17	1.07936082690651e-16
2008185	23	1.0428386047137e-16	7.21472748449845e-17	3.88408016965489e-17	3.99036775806675e-17	7.1605177305258e-17	4.66787890154629e-17	5.85902823289435e-17	6.40618824294642e-17	1.1112867883275e-16	5.47131748870944e-17	1.07866815545113e-16	1.1265595184547e-16	6.32814672935056e-17	5.77455360720199e-17	6.80329233194345e-17	3.79322230457204e-17	1.02454481919809e-16	5.52397628467879e-17	1.07407204352226e-16
2008186	0	1.04398328250589e-16	6.70199738769612e-17	4.58985851473052e-17	4.26734311051806e-17	7.32301177046785e-17	4.66241538075567e-17	6.18414177163017e-17	6.57138444215056e-17	1.10224465214463e-16	5.76546978199861e-17	1.08686109725036e-16	1.19477379662411e-16	1.14577211681875e-16	5.88562544784843e-17	6.02538055152468e-17	3.84950286696175e-17	1.21078107869341e-16	5.49491430372745e-17	1.07302275132761e-16
2008186	1	8.01049982964951e-17	5.22957466133045e-17	1.08583827852326e-16	4.56621955842554e-17	7.50370652936456e-17	4.43363630199629e-17	6.97928027177585e-17	6.70642256359253e-17	7.46752814483453e-17	6.00791028098367e-17	7.24537760712988e-17	1.22288036333425e-16	9.11759660385687e-17	5.90196320363308e-17	5.43243756390624e-17	3.83548862006775e-17	1.21160704840252e-16	5.36226906796601e-17	9.05965346115441e-17
2008186	2	6.63754648870122e-17	4.50358464587352e-17	1.12137703607444e-16	4.85133233614728e-17	8.09750752879725e-17	4.12527426502799e-17	8.29157044478832e-17	6.86583257836783e-17	6.95033022206152e-17	6.33604078622622e-17	6.30951010198035e-17	7.04621229716621e-17	8.74827257421094e-17	6.0091473431611e-17	5.0004161224735e-17	3.81130896336504e-17	1.21037732509843e-16	5.53275098214386e-17	8.07226084360128e-17
2008186	3	5.94443715278666e-17	3.6397357639403e-17	1.16019512327219e-16	5.07996636223454e-17	9.31399948748848e-17	3.81576607832138e-17	8.43737808121305e-17	7.16663617616235e-17	6.94584409569589e-17	6.88416771298373e-17	5.92909207919141e-17	3.93629605778009e-17	8.40570099653364e-17	6.0082378569322e-17	4.69663429722733e-17	3.75670740006275e-17	1.20978142963325e-16	6.11861674792836e-17	7.71270922842901e-17
2008186	4	5.69869469472655e-17	3.17509368643729e-17	1.16768539844357e-16	5.22951233288565e-17	9.93557501681467e-17	3.78553283711382e-17	7.61679592836508e-17	7.64773219825634e-17	7.05514911159687e-17	7.19542237725888e-17	1.09800290886574e-16	2.57158832696704e-17	1.11973386668923e-16	6.34110027763732e-17	4.51953227329389e-17	3.97687515045288e-17	1.20690183584542e-16	6.92310878167375e-17	7.32230812715638e-17
2008186	5	5.66081641799767e-17	2.68590172783792e-17	1.1695175798691e-16	5.28354875516944e-17	1.16468336350569e-16	3.29329291961997e-17	8.37603212205455e-17	8.01952525575385e-17	8.80556338453231e-17	7.02794695794155e-17	1.09868765909075e-16	1.92613793845363e-17	1.11557922223978e-16	6.52887214711598e-17	4.50496932696039e-17	4.71011869235659e-17	1.20575024440124e-16	8.69857289532633e-17	8.06514823558545e-17
2008186	6	5.66311366228829e-17	1.96761700662039e-17	1.15501511056182e-16	5.25776880563269e-17	1.15503111687722e-16	1.7778538077388e-17	1.07757002637239e-16	8.0859595997016e-17	1.09035573844051e-16	1.06447940808538e-16	1.09706985899203e-16	1.54795563354379e-17	1.11512857423936e-16	6.50605994225108e-17	4.47650328504617e-17	4.8827515991788e-17	1.19944483928617e-16	9.40770516385252e-17	1.14936601319024e-16
2008186	7	5.64913068855e-17	1.48931820639178e-17	1.11951609393366e-16	5.19110562973943e-17	1.14051908718721e-16	8.04942370082391e-18	1.08602490917463e-16	1.09340403647448e-16	1.0686630184281e-16	1.06451138671637e-16	1.09620281487167e-16	1.50367105090406e-17	8.17829455858453e-17	6.59243410439069e-17	4.67779240294208e-17	4.58452144505018e-17	1.1918776744094e-16	1.0827391726514e-16	1.0920036364888e-16
2008186	8	5.61481735830876e-17	1.21530570228422e-17	1.04459122182893e-16	5.34049520700307e-17	1.11848281672624e-16	6.16781543524419e-18	1.03664104431742e-16	1.08629971115422e-16	8.59570944500835e-17	1.00785727851821e-16	1.09556613690036e-16	1.50403869929227e-17	6.75655879756871e-17	6.32752144694685e-17	5.86893521757054e-17	4.31005281167943e-17	1.19132037027718e-16	1.08808978217775e-16	1.06735735714121e-16
2008186	9	5.60252968564975e-17	1.03924800966215e-17	9.39744303214483e-17	5.41968924341387e-17	1.09333462610283e-16	5.36528694987275e-18	9.42055512753583e-17	1.07910935854877e-16	1.07925353015151e-16	9.24069906709445e-17	1.08981136135247e-16	1.62097818765092e-17	6.45356932765708e-17	6.11975202618604e-17	1.25638239797998e-16	4.09653088873445e-17	1.19220943194691e-16	1.10616332119074e-16	9.67280169951803e-17
2008186	10	5.76329140792155e-17	9.08030400492881e-18	8.60506605313573e-17	5.47954144998377e-17	1.08792759402935e-16	4.85562165045e-18	8.98204175387563e-17	1.0717239533829e-16	1.08545881258873e-16	8.75496633893195e-17	1.08330088139164e-16	1.82228662363677e-17	6.57143078038867e-17	5.85844272731975e-17	1.27998472360953e-16	1.83949664639261e-17	1.19420108603123e-16	9.72142974318007e-17	7.91128123955722e-17
2008186	11	6.44091546067388e-17	8.28341633208143e-18	7.94656675450734e-17	5.55590925783515e-17	1.0373750398204e-16	5.23302053677634e-18	8.82367461780775e-17	1.07216436382169e-16	1.08933651356182e-16	8.29961499087142e-17	1.08577132577573e-16	1.94565506708589e-17	6.87234153175096e-17	5.55325784230658e-17	1.32289936907377e-16	7.1136425490397e-18	1.19026422036018e-16	8.63336012739474e-17	7.03962361542322e-17
2008186	12	6.58132926353811e-17	8.48171390079608e-18	7.44200194340258e-17	5.71087984805213e-17	1.09930790896481e-16	5.48276795595768e-18	8.55237246572944e-17	9.60288899601556e-17	1.11805301185143e-16	7.91730126582773e-17	1.05310616042462e-16	1.99964038643318e-17	7.89628210326836e-17	5.34315712163887e-17	1.3817099949328e-16	2.14627609357161e-18	1.18684494868567e-16	7.96609951527463e-17	6.94898443341954e-17
2008186	13	6.79370110705941e-17	8.50440353680231e-18	6.92753504050981e-17	5.8570526084101e-17	1.10538137605901e-16	5.05168164602092e-18	8.58414904660322e-17	9.18923842471555e-17	1.13197962847018e-16	7.61042153306542e-17	8.16403773963024e-17	2.04310014991357e-17	8.32591899677247e-17	5.087504752666e-17	1.37145332739639e-16	1.5398192455232e-18	1.17500818102207e-16	7.44865952305258e-17	6.81310855648726e-17
2008186	14	6.94690276355411e-17	8.62145790241453e-18	6.77671800591352e-17	6.0202641177829e-17	1.11654166921084e-16	4.02071331353561e-18	8.67622605804293e-17	1.07684262666481e-16	9.92720405535126e-17	7.33265735788472e-17	7.08601040555965e-17	2.11183960632912e-17	7.53973717533172e-17	4.88377250713174e-17	1.35105935923666e-16	1.70410632192812e-18	1.1738789002034e-16	7.07346217529913e-17	7.43853756990325e-17
2008186	15	6.98444555477754e-17	8.81887554832425e-18	7.25838785178959e-17	6.22446212024229e-17	1.14228873187781e-16	3.35893309736456e-18	8.83577160371894e-17	1.07040338372049e-16	8.02874275867835e-17	7.22318762586577e-17	6.9042110451386e-17	2.205294337447e-17	6.40451887152447e-17	4.65377494241024e-17	1.34196332685454e-16	2.06740658670246e-18	1.18717202421315e-16	6.79872815979878e-17	7.09757846134441e-17
2008186	16	6.91906785552527e-17	8.59712641341879e-18	7.05443893140847e-17	6.38284919503082e-17	1.16205194983802e-16	3.27642914497088e-18	9.17319364219734e-17	1.0694047170249e-16	1.04100978631511e-16	7.40181508779211e-17	7.04102955674644e-17	2.30133863447401e-17	5.66241671796442e-17	4.46223545441696e-17	1.28897240585967e-16	1.95655630908853e-18	1.20215679030275e-16	6.55186069594155e-17	6.68510085261404e-17
2008186	17	6.77526218661315e-17	9.73011467710072e-18	6.64862284610594e-17	6.45919796483777e-17	1.15946297747789e-16	2.80872739640179e-18	9.08549595630408e-17	1.07092236371816e-16	8.21456161210305e-17	7.77028175969226e-17	6.94202262564748e-17	2.45430194248898e-17	5.20553006803949e-17	4.3114366024071e-17	1.1544665882975e-16	1.46564359945169e-18	1.21862970064661e-16	6.35625506868946e-17	6.41424538307077e-17
2008186	18	6.70099676476609e-17	1.16972611590119e-17	6.36862071705018e-17	6.60276291171635e-17	1.15324356834797e-16	2.53715576669313e-18	8.68580153230399e-17	1.07041814103126e-16	7.22988053010284e-17	7.98048298772653e-17	1.09246594574122e-16	3.25441104905868e-17	5.04474845489608e-17	4.2205215999529e-17	9.83815274208759e-17	2.18695200108036e-18	1.22671716036612e-16	6.21747513236675e-17	6.25437572010377e-17
2008186	19	6.79238071082642e-17	1.60096240574002e-17	5.86314400310797e-17	1.07000551004297e-16	1.13309546562873e-16	2.32608332950745e-18	8.76268441975035e-17	1.06895022074358e-16	6.87391752673014e-17	7.84912166624033e-17	1.09389746197797e-16	1.14073200426613e-16	4.72226537830023e-17	4.20868449233427e-17	7.93122131270628e-17	5.57868495095213e-18	1.20875025649552e-16	6.13733437793748e-17	5.95736954451383e-17
2008186	20	7.13699776769348e-17	2.13195009380922e-17	5.5613378761299e-17	1.08097782865916e-16	1.11777978448635e-16	2.22508640093999e-18	1.08311925512704e-16	1.07263853165009e-16	6.71540547592519e-17	1.09137661878136e-16	1.10005754236035e-16	1.10842039841147e-16	4.5300029520744e-17	4.31931647265875e-17	6.88804774971977e-17	8.4618285080245e-18	1.17991112094391e-16	5.93140785493829e-17	5.32163269709919e-17
2008186	21	8.1561553056132e-17	2.98450203653355e-17	5.38704047511973e-17	1.0994129385956e-16	1.10120429305388e-16	2.08050008845055e-18	9.07439588761419e-17	1.07631104772572e-16	6.41273265826468e-17	9.14452913542664e-17	1.10405223822907e-16	1.11135911783637e-16	4.35744635049387e-17	4.58543586236118e-17	6.40487057488415e-17	9.71865970371884e-18	1.15588916246905e-16	5.71555022337077e-17	5.04040425202261e-17
2008186	22	1.07642263273264e-16	4.74853400555518e-17	5.32379659943186e-17	1.13204682149341e-16	1.09873588882686e-16	1.92180329594404e-18	8.11942612837305e-17	1.08196541509664e-16	6.50626270016529e-17	7.8499775574912e-17	1.11046211503967e-16	1.10939933381475e-16	4.27208012835286e-17	4.93754584660713e-17	6.2783532469259e-17	8.89344412405989e-18	1.14606217148857e-16	5.64314019064816e-17	4.94063765568619e-17
2008186	23	1.08252248306466e-16	1.08970879569435e-16	5.29284312315754e-17	1.1995282647152e-16	1.09916359540247e-16	2.1851330983658e-18	7.41097191725212e-17	1.09293074782676e-16	6.71850833988398e-17	7.32310315677182e-17	1.11264557665506e-16	1.09751917062692e-16	4.26976263799585e-17	5.33381118874403e-17	6.3925661262524e-17	8.32583745805811e-18	1.14328644452788e-16	5.6866661430347e-17	4.88958426059174e-17
2008187	0	1.09892888637548e-16	1.16564162718786e-16	5.26720836018118e-17	1.07863965375209e-16	1.09058661974287e-16	3.26651586932197e-18	6.99414436943947e-17	1.07948958619657e-16	6.68271173634038e-17	6.87846914745832e-17	1.1111334445915e-16	1.09565814132995e-16	4.24988540814389e-17	5.65637668698681e-17	6.55355394811735e-17	8.04074636274606e-18	1.13489303462428e-16	5.73587053522287e-17	4.82688080535807e-17
2008187	1	1.1224387879663e-16	9.12253790558513e-17	5.24739313635346e-17	1.04839268379888e-16	1.0918912927749e-16	8.17517590787313e-18	6.5801378474897e-17	9.65131440362765e-17	6.47781874407015e-17	6.49921497091015e-17	1.10975589685694e-16	1.08785167336367e-16	4.32126222027317e-17	5.73023061854034e-17	6.60659637234219e-17	8.01426775535809e-18	1.13338946194083e-16	5.797920209455e-17	4.74732091123922e-17
2008187	2	1.16066723276731e-16	8.98834384399393e-17	5.22383651311199e-17	9.9798753925603e-17	1.0987858016754e-16	1.40441438366522e-17	6.53718455218048e-17	1.15165942078783e-16	6.29396677584318e-17	6.30642950820624e-17	1.09446225156068e-16	6.1902924988207e-17	4.58706640266029e-17	5.6145868292243e-17	6.65146922685797e-17	7.61914159637164e-18	1.12892691164214e-16	6.024235436707e-17	4.8215708538213e-17
2008187	3	1.04953119623139e-16	8.92603787954122e-17	5.20097526190696e-17	9.38054950392938e-17	1.03444304904954e-16	2.42500363029043e-17	6.26428865503954e-17	1.1610202071588e-16	6.2838138356656e-17	6.22484601978174e-17	1.08542564913178e-16	6.07187964421702e-17	6.63233340272445e-17	5.52338524695458e-17	6.43909960922718e-17	5.42500059776706e-18	1.11833768150395e-16	1.02247779578739e-16	4.69394076862047e-17
2008187	4	9.75104408122904e-17	8.93839704855331e-17	5.18680162233691e-17	1.10215210957725e-16	7.98170864967671e-17	3.61704673906004e-17	6.01567450532716e-17	1.1636338075673e-16	1.17769247598355e-16	5.91452346879436e-17	1.07484722882585e-16	6.03397686274816e-17	1.18591724990925e-16	5.41025185942826e-17	6.2149705534858e-17	4.26318828465086e-18	1.1103920830166e-16	7.18364500825467e-17	4.61929505222542e-17
2008187	5	9.43631537668662e-17	9.32914822640603e-17	5.15205987444779e-17	1.09045427559341e-16	7.01893279314185e-17	4.96804206635142e-17	5.79714002763409e-17	1.16350675914455e-16	1.14811088782784e-16	5.68162317301e-17	1.08752469556547e-16	6.48830907398159e-17	1.18645646605197e-16	5.93533828058441e-17	6.3173303645859e-17	5.97625362316723e-18	1.10722035748135e-16	6.30069999698363e-17	4.82450728957005e-17
2008187	6	1.18545012751764e-16	9.41112389262145e-17	5.06083683618779e-17	1.09481193973616e-16	6.9111568207726e-17	1.12323758683237e-16	5.59735220112487e-17	1.17916390083217e-16	1.01524442348337e-16	5.94800100224331e-17	9.15750789576599e-17	1.0702951730994e-16	8.37335594148771e-17	6.70144803425581e-17	6.58191440851353e-17	8.93449197641981e-18	1.09899797771925e-16	1.09963624792853e-16	5.09602646901153e-17
2008187	7	1.05440675711181e-16	1.1933939393715e-16	5.73836023159383e-17	1.09689017424982e-16	8.05076041658498e-17	1.11005924588607e-16	5.86921093094363e-17	1.05354582784565e-16	8.45446902482194e-17	6.28628185625988e-17	7.79074044404307e-17	1.06920650954075e-16	6.72635590676267e-17	6.95875110312605e-17	7.00191604215629e-17	1.49112438964576e-17	1.10148867190573e-16	1.10791796980523e-16	5.09110424315153e-17
2008187	8	9.85268273525884e-17	1.1566928309362e-16	6.20855522995714e-17	1.10035554105937e-16	1.09588291176818e-16	1.09075653318367e-16	6.21199306094676e-17	9.40454160106107e-17	8.19985582833372e-17	6.93262140027742e-17	6.58728526900168e-17	9.83480749434834e-17	6.20959916719417e-17	6.96943614457237e-17	7.19091204421988e-17	2.32688270927366e-17	1.1064637939729e-16	9.27217973445454e-17	5.30368428888141e-17
2008187	9	9.63061637389297e-17	1.10439194730021e-16	6.26596638767664e-17	1.11517804125236e-16	1.09491200480992e-16	1.04906865820027e-16	1.21745581359874e-16	8.75891334972992e-17	8.24803267928385e-17	1.18524510272386e-16	5.65521300423911e-17	1.05960358056824e-16	6.06603845538055e-17	7.07653818384658e-17	7.69179181988839e-17	3.408615885507e-17	1.1125656014933e-16	7.5569474406007e-17	5.61276582336398e-17
2008187	10	9.55720053898659e-17	1.09328177069675e-16	6.02431677213551e-17	1.10259491997263e-16	1.09572589534603e-16	9.28293660872884e-17	1.20952996066641e-16	8.44208411317439e-17	8.21515378536985e-17	1.17358623072198e-16	4.98282348318689e-17	9.48275833750126e-17	5.9587834905916e-17	7.08374536695514e-17	8.5347532936724e-17	1.10455084325409e-16	1.11985895128992e-16	6.73657484341591e-17	5.73333280250876e-17
2008187	11	9.63430863870018e-17	1.05957971375903e-16	5.73162167039306e-17	1.05681493581154e-16	1.10613545008609e-16	8.51464368258543e-17	1.20791733864268e-16	8.1950419130964e-17	7.92537572737345e-17	1.14939196378022e-16	4.56305497093128e-17	7.3639613408038e-17	6.0144513400862e-17	7.18073568796113e-17	9.76385857837379e-17	1.10779905558334e-16	1.12687712060005e-16	6.32669208209814e-17	5.48489694425821e-17
2008187	12	1.02972844609215e-16	1.03059933033611e-16	5.41092801568409e-17	9.81147024172596e-17	1.04893163555579e-16	7.85115102947084e-17	1.17176810127256e-16	7.88391837157829e-17	7.52182480235216e-17	1.14869783429414e-16	4.26447319955959e-17	6.00896363294608e-17	1.21661338541491e-16	1.25316610090864e-16	9.27843341829264e-17	1.10847053515619e-16	1.12489166194266e-16	6.03086002094524e-17	5.24591516385087e-17
2008187	13	1.04535710288443e-16	1.01659997068199e-16	5.13005515794619e-17	9.11905222388377e-17	9.45983778577542e-17	7.40856250546941e-17	1.0467071445353e-16	7.5304824753464e-17	7.56365192035665e-17	1.06542741804331e-16	4.00764778602867e-17	4.82857926763675e-17	1.1659754381057e-16	1.17932169023432e-16	1.04792346089934e-16	1.10252387556534e-16	1.11767142175569e-16	5.9211280175763e-17	4.61364343722115e-17
2008187	14	1.03224494241618e-16	1.01219394012106e-16	4.8115259647976e-17	1.10367313739182e-16	8.97902215782551e-17	7.0827521557361e-17	9.19085848268656e-17	7.14123656790006e-17	1.09429736647119e-16	9.91265955980324e-17	3.73100905362589e-17	3.80244854634754e-17	9.47485139313923e-17	1.0045477655569e-16	9.17940510035172e-17	9.1667566644701e-17	1.11554598132047e-16	5.57659333768242e-17	4.13067891128535e-17
2008187	15	1.03744239615114e-16	1.04209812354172e-16	4.53198707586425e-17	1.02981429553798e-16	8.73835737068444e-17	6.80512953419508e-17	8.49566711123097e-17	6.95789760124128e-17	1.10145338162358e-16	9.1842319834743e-17	3.3803642882785e-17	2.97071932485883e-17	1.23897412717823e-16	8.69116303825909e-17	1.08004156281936e-16	7.75806250722166e-17	1.12264420230413e-16	5.30286461233656e-17	4.99802827047468e-17
2008187	16	1.01357510618561e-16	1.04144209941359e-16	4.34232125176205e-17	8.18108858399717e-17	8.56369161738488e-17	6.64412619682975e-17	7.92051298058701e-17	6.81214568003166e-17	1.05587008827543e-16	1.10822140529787e-16	2.96844294498536e-17	2.31876619720596e-17	1.18517373068982e-16	1.17433899613153e-16	1.09991912817142e-16	9.583654847854e-17	1.07920963920864e-16	5.15824360719946e-17	1.01296797520466e-16
2008187	17	9.90561276955305e-17	1.01776681528992e-16	4.18340716330778e-17	1.10748014087107e-16	8.37942696947086e-17	6.74122671120006e-17	7.37521543335181e-17	6.72014776081723e-17	8.40374645418093e-17	8.66349610151792e-17	2.54773695935396e-17	1.83881490587525e-17	1.22751676982657e-16	1.05443287080055e-16	1.1074014294472e-16	1.08926650084922e-16	1.03919860990133e-16	5.06618105465232e-17	9.95553862696848e-17
2008187	18	9.94564474235332e-17	9.67029809373702e-17	3.99610382844214e-17	1.08908180628469e-16	8.03554977147675e-17	6.88761143605183e-17	7.19916830983808e-17	7.07924748147915e-17	6.67140913568827e-17	7.53670451930793e-17	2.14866846356115e-17	1.48610905018625e-17	1.2251518104204e-16	9.77282184410033e-17	1.05162653395228e-16	1.09286405485046e-16	1.05413582106275e-16	5.03189422209476e-17	1.1009929648749e-16
2008187	19	9.81144131512137e-17	9.08515119404338e-17	3.76626211894988e-17	8.94628978522236e-17	7.53199788478884e-17	6.76691605529965e-17	6.73039272965799e-17	7.17416537192549e-17	5.67524194487417e-17	6.962118712764e-17	1.77085606894434e-17	1.21601784071239e-17	1.22339332953583e-16	1.24027509965942e-16	1.09779490770046e-16	1.09795159509685e-16	1.12253653551952e-16	5.03516671270771e-17	1.12670436791948e-16
2008187	20	9.61510044716202e-17	8.45616433795606e-17	3.59040292905756e-17	8.0076050607326e-17	7.0109519142252e-17	6.27568169893679e-17	6.24771168692697e-17	7.04089563158755e-17	5.21440999331236e-17	6.78630789489819e-17	1.44911950645084e-17	1.00113998948909e-17	1.22114681270255e-16	1.17945001903336e-16	1.09580537122631e-16	1.10158494168167e-16	1.1148047625387e-16	5.05843974654003e-17	9.71830854648039e-17
2008187	21	9.31865844567325e-17	7.87911323170937e-17	3.44597383325887e-17	7.45538077913969e-17	6.73443155418166e-17	6.01816999324393e-17	5.95171269414132e-17	6.65118661063382e-17	5.04058080264054e-17	7.35388442027576e-17	1.19592671789509e-17	8.42323132435273e-18	1.21677605258871e-16	1.08191774276844e-16	1.09389932169346e-16	1.11748404392987e-16	1.10964093784189e-16	5.09972115021088e-17	9.04577942777641e-17
2008187	22	8.94644470628928e-17	7.58036468003374e-17	3.27712148266084e-17	7.14441876221561e-17	6.52529037631041e-17	5.79844310174234e-17	5.72450201016598e-17	6.43202723031366e-17	4.96966636380991e-17	1.17877132177264e-16	1.01016673220854e-17	7.58292863297826e-18	1.21448501015296e-16	9.93013479224981e-17	1.10757287284696e-16	1.14906395193217e-16	9.18502172578101e-17	5.13228606034591e-17	8.54664882846393e-17
2008187	23	8.59896174096308e-17	7.4687396695178e-17	3.12338249212624e-17	6.88584973220197e-17	6.35159144344497e-17	5.59503509185071e-17	5.58051357129211e-17	6.31690603459552e-17	4.92467236023108e-17	8.92134462320021e-17	8.54943695640154e-18	7.87656855072355e-18	1.21325745700367e-16	1.05090381764172e-16	1.11687115947338e-16	1.1604256826337e-16	7.77922447207416e-17	5.18453637966498e-17	8.32276901915461e-17
2008188	0	8.38135351545887e-17	7.55499777599693e-17	2.99449219386381e-17	6.98434053269678e-17	6.35654669082983e-17	5.54014894476615e-17	5.48051445736125e-17	6.36266269279848e-17	4.89572329717912e-17	7.59284691506113e-17	7.24234588367909e-18	8.86342044047861e-18	1.21116501194095e-16	1.14538357716428e-16	9.53712966497878e-17	1.1818704255535e-16	6.897946876835e-17	5.27541845860083e-17	8.68882946042029e-17
2008188	1	8.50150098797769e-17	7.68322580035042e-17	2.89853761574592e-17	7.30608156144206e-17	6.30891867133694e-17	5.66693046715184e-17	5.89407498414374e-17	6.41178885953608e-17	4.86688418643508e-17	7.02704294127707e-17	6.09663764034299e-18	9.98493151886552e-18	1.22188947434026e-16	1.1574129513308e-16	8.65995146806577e-17	1.09283128090719e-16	6.28449886275816e-17	5.36742627248645e-17	8.43321097119197e-17
2008188	2	8.90755857482183e-17	7.8477056672317e-17	2.8675970070078e-17	7.59881600500575e-17	6.41990464811134e-17	5.60466567789623e-17	6.05093175540267e-17	6.44426544994002e-17	4.82370967037678e-17	7.08975304930446e-17	5.10123450002733e-18	9.83824936883603e-18	1.2141817989201e-16	1.21053502776363e-16	7.83271439371883e-17	9.62800590717736e-17	5.84262018677883e-17	5.39324921913938e-17	7.81057163432368e-17
2008188	3	8.89794555073249e-17	7.81230900190826e-17	3.09794414238522e-17	7.61452466162447e-17	6.49978679592615e-17	5.55038970695318e-17	6.59087459842178e-17	6.92201068786965e-17	4.86916008088683e-17	6.93624231574585e-17	4.3723523774268e-18	2.62081999080522e-17	1.10615574416128e-16	1.04698202865273e-16	7.15403878263676e-17	8.64266995903474e-17	5.55729656343603e-17	5.34784491599463e-17	1.18986847925734e-16
2008188	4	9.62909603997737e-17	7.46249300860952e-17	1.19064403283934e-16	7.54415946879446e-17	6.70379282681471e-17	5.55296548981495e-17	6.84634106342365e-17	7.23400726810408e-17	5.25980466056246e-17	1.16429918832951e-16	4.09408269078005e-18	2.18156713656613e-17	1.02760688731467e-16	5.87284571056406e-17	6.76148498265161e-17	7.86593816341822e-17	5.37230364621227e-17	5.22942176103846e-17	1.16106642428024e-16
2008188	5	1.16078547938716e-16	7.92120433863968e-17	1.19354762783611e-16	7.98380871314969e-17	6.99903823351391e-17	5.91282606026656e-17	1.18772828856276e-16	7.77072762159091e-17	5.75651951634682e-17	1.17131273500542e-16	4.38695962819124e-18	1.25452175270778e-17	1.20939967012757e-16	3.5298258403362e-17	6.48605423360242e-17	8.08027556592346e-17	5.3220641483682e-17	5.12553783114154e-17	1.07862747169138e-16
2008188	6	1.0620892755996e-16	7.18988260401779e-17	1.11620936534947e-16	8.4156207606178e-17	7.40931270129479e-17	6.08956192786115e-17	1.18813315346474e-16	7.99638788385217e-17	6.20115186055908e-17	1.16809622751032e-16	5.62953278878281e-18	1.0595547020933e-19	1.21879967084974e-16	1.78863632570081e-17	6.32826272576826e-17	1.19027639953273e-16	5.45519629717778e-17	5.21148075089358e-17	1.05537370589652e-16
2008188	7	1.1054972944652e-16	6.48518496485378e-17	1.09210671512478e-16	9.0969616228776e-17	8.05257753373166e-17	5.97183011822581e-17	1.17650734896073e-16	7.986183940102e-17	8.18371719120335e-17	1.16388230946522e-16	8.61076335312702e-18	7.82070617200472e-17	1.23052037198643e-16	7.12881888031623e-18	6.11090535610293e-17	1.20586823333387e-16	5.72603600737898e-17	6.27928716281742e-17	1.05043245028294e-16
2008188	8	1.13062994873131e-16	6.09485740356973e-17	1.19947242244037e-16	8.91371361504808e-17	8.59485815497061e-17	5.558917816798e-17	1.15929979370717e-16	7.78894601638985e-17	1.18716466548122e-16	1.16554012347105e-16	1.42340378455561e-17	9.50139492001913e-17	1.23084806281759e-16	2.71887715623931e-18	6.01012543476525e-17	1.21494601198674e-16	6.02162551472656e-17	1.18674212398592e-16	1.04844726010249e-16
2008188	9	1.11369870010346e-16	6.85978265544265e-17	1.20782958845299e-16	8.31660470323948e-17	8.63271364089152e-17	5.13291132098881e-17	1.1613355228445e-16	7.58220955069714e-17	1.19566658797175e-16	1.14509826951182e-16	2.15050081042356e-17	9.58712798068771e-17	1.2083272206364e-16	1.75142790681195e-18	6.02672781484816e-17	1.11032642071465e-16	6.5231817083644e-17	1.19734431249433e-16	9.9902649446592e-17
2008188	10	1.10442515172526e-16	9.98521914727656e-17	1.21550961774005e-16	7.53288798753348e-17	8.41805242081978e-17	4.84709276773798e-17	1.05934031431817e-16	8.73661187173726e-17	1.19543047899594e-16	1.04488893063831e-16	2.94699743304598e-17	7.34233470197255e-17	1.1513096741524e-16	1.71964998631896e-18	6.07991900886943e-17	9.34540030911202e-17	7.93018453848027e-17	1.19591246844906e-16	9.144966881854e-17
2008188	11	1.10792185528717e-16	8.87528607310209e-17	1.21966660075118e-16	6.59275710556798e-17	8.05078186266804e-17	4.62751105460624e-17	9.81886162018172e-17	1.22886698523096e-16	1.14098784341357e-16	1.01301779837138e-16	3.80363588131314e-17	8.5610596842303e-17	1.15233980774865e-16	1.79349972913883e-18	6.05194743206923e-17	8.00663252079964e-17	9.45367462108605e-17	1.18508177015133e-16	8.51175923291845e-17
2008188	12	1.12176251287454e-16	1.10879865939464e-16	1.219168857108e-16	5.76791547546499e-17	7.61210006679415e-17	4.53840106110221e-17	9.88871587971865e-17	1.16989139781616e-16	1.1788899809961e-16	8.5669962208193e-17	4.55958987284555e-17	8.75155252292202e-17	1.05669163321451e-16	2.23688923645164e-18	5.98477181427076e-17	6.99800444849169e-17	1.14956459208846e-16	1.14979018564004e-16	7.90969697555046e-17
2008188	13	1.13716247791047e-16	1.10573706883559e-16	1.2212771119146e-16	5.20037297935438e-17	8.08509133645762e-17	5.54600070797357e-17	9.31632591903409e-17	1.17442138313872e-16	1.17289001960191e-16	1.04896055121334e-16	5.13837950464664e-17	7.61679568832946e-17	8.63527395632756e-17	2.90352327499705e-18	6.01538740152456e-17	6.09351761184681e-17	1.09059496385828e-16	1.12142830288057e-16	7.51490479651529e-17
2008188	14	1.14976662855277e-16	9.82586362493499e-17	1.19656525765168e-16	5.18152535380375e-17	9.28020152399804e-17	6.67332558890992e-17	1.00405701109096e-16	1.1404715526908e-16	1.16818142918998e-16	1.0363015203045e-16	5.60581879284065e-17	6.16563887059168e-17	4.64808281421021e-17	3.79465137516833e-18	1.08332012511437e-16	7.36129806008136e-17	1.03596282430737e-16	1.0805394407011e-16	7.67114018275896e-17
2008188	15	1.13879470975493e-16	9.35816213867595e-17	1.09332687543419e-16	1.23329587357037e-16	9.72311025570701e-17	7.43880004546893e-17	1.01690655590637e-16	1.1525459385466e-16	1.16534926930181e-16	1.00973493910404e-16	5.90009337056047e-17	5.58047503684187e-17	7.73971470013388e-17	4.43617374260455e-18	1.12095649276627e-16	8.08546794773567e-17	9.84301941700417e-17	1.11136815159955e-16	9.17362391219068e-17
2008188	16	1.13056686733645e-16	9.59076031691389e-17	6.81251074781224e-17	1.04711284963934e-16	1.07918419310084e-16	8.84688849208571e-17	8.93655582957204e-17	1.11306265768607e-16	1.17437378491851e-16	9.28475368297254e-17	5.96699448111089e-17	8.01679875722929e-17	9.84303684352703e-17	4.96372470584007e-18	1.11719135965794e-16	7.42284267265907e-17	9.3795558885671e-17	1.05314363172581e-16	9.88331392459345e-17
2008188	17	1.16613315372396e-16	9.63586380047858e-17	4.14430533633445e-17	1.06109977186979e-16	1.15864211728936e-16	1.02949104823906e-16	8.2510024943558e-17	1.1036651700676e-16	1.18269349956611e-16	8.61034607645829e-17	5.92213565251381e-17	1.1201023251906e-16	2.03761109545607e-17	5.43317080882395e-18	1.12064972603867e-16	6.3255307521194e-17	8.9463276414371e-17	1.11228138893072e-16	1.00490772289652e-16
2008188	18	1.14168898653272e-16	9.94149333215587e-17	2.1193791242608e-17	1.16396455252741e-16	1.10701242281816e-16	1.15603759246084e-16	7.63042771870201e-17	1.10267764664606e-16	1.18042202520846e-16	8.94182334546201e-17	5.79573097448469e-17	1.07527870886265e-16	1.01850346216024e-16	6.0201753924104e-18	1.0478524389762e-16	5.50486046184128e-17	8.59542271823547e-17	1.11904048390519e-16	7.89562961797694e-17
2008188	19	1.10637571537755e-16	1.18473124813471e-16	2.10905807292372e-17	1.01949546375467e-16	1.10479735284153e-16	1.16957165563317e-16	7.26041737024761e-17	1.10085805442679e-16	1.07588348200559e-16	9.197184481144e-17	5.66674478871402e-17	1.12449130343808e-16	1.02416626919567e-16	7.49479651591214e-18	8.26356770368246e-17	4.93257890869979e-17	8.31149145313906e-17	1.0518757356405e-16	7.33854179836882e-17
2008188	20	1.09667862905422e-16	9.43286678137214e-17	1.124199676873e-16	8.97989528928407e-17	1.09056387611325e-16	1.16642055639904e-16	7.12303306068325e-17	8.59184970304197e-17	1.06572915388775e-16	1.17662430710429e-16	5.55634641352362e-17	1.14530906825036e-16	2.53956282708583e-17	1.07957334941037e-17	8.0388647903273e-17	4.63393358743221e-17	8.11061274684683e-17	1.01066505372756e-16	1.06602551858268e-16
2008188	21	1.04734809560429e-16	8.53653292170476e-17	1.13704495784692e-16	8.24508210667439e-17	1.08178888507019e-16	1.17186783637231e-16	8.03022937720405e-17	7.58824509672921e-17	1.09535888171817e-16	1.17707143217412e-16	5.45474915804887e-17	1.03489589565471e-16	1.0140939364322e-16	1.58563410142159e-17	7.96657137144291e-17	4.49669946769879e-17	7.82880803632989e-17	8.67720535508503e-17	1.05445438282352e-16
2008188	22	1.05853063828238e-16	7.9395629662039e-17	1.14899988086329e-16	7.75045723893392e-17	1.08544346382882e-16	9.86099568551961e-17	9.13522025259023e-17	7.23972246927764e-17	1.08535631036402e-16	1.14999562618748e-16	5.33111193286991e-17	5.47630804560996e-17	3.62746642830484e-17	1.94898525845608e-17	8.01729451873995e-17	4.31494168396132e-17	7.64870290710778e-17	9.39362963051568e-17	9.07957139463555e-17
2008188	23	1.08184916776871e-16	7.24783022027453e-17	1.15191860839915e-16	7.42818798953211e-17	9.67302533574562e-17	8.64566602703367e-17	9.47198632591723e-17	1.11601916488478e-16	1.08525483647848e-16	1.12361290644835e-16	5.15264558667692e-17	3.33285138956981e-17	1.83760157015565e-17	1.39019543279198e-17	7.69798156827687e-17	4.3043120008375e-17	7.45223023913044e-17	1.05077740406355e-16	1.05780608524821e-16
2008189	0	1.08539472102457e-16	6.6310897801495e-17	1.16102937746384e-16	7.41365627504338e-17	8.24282014265103e-17	8.1127113205729e-17	9.25553493040694e-17	1.17211961649186e-16	1.08442765282871e-16	1.10983668026382e-16	4.92128674815221e-17	2.24122930198666e-17	1.2454698425386e-17	1.02949398370133e-17	7.65469607261444e-17	4.35437025696103e-17	7.08413219829972e-17	1.11869951320829e-16	8.1454370356507e-17
2008189	1	1.08494189865347e-16	6.19994228361476e-17	1.17391917372351e-16	7.56960564851829e-17	9.1934844685361e-17	7.75509335205104e-17	8.69977974899501e-17	1.1920115103633e-16	1.00616543309823e-16	1.1010955715522e-16	4.71060215587857e-17	1.70001680420985e-17	9.52026891507184e-18	7.63042778086271e-18	7.62489793005239e-17	4.4617625770631e-17	7.14080536739555e-17	1.11244501888502e-16	7.33075309708593e-17
2008189	2	1.08955838436217e-16	5.9327724577265e-17	1.18138348865884e-16	7.57106561538582e-17	1.1809990746078e-16	7.42874153971554e-17	8.23580690004457e-17	1.20558713162224e-16	9.86821861208094e-17	1.11377635911746e-16	4.5286201785097e-17	1.49872932557797e-17	7.86674277438221e-18	6.86943823446851e-18	7.49432708854348e-17	4.3879001212963e-17	7.47593487515358e-17	1.10500152892054e-16	6.6669772570829e-17
2008189	3	8.97912908009695e-17	5.72859902526253e-17	1.17874615669818e-16	7.42969616392595e-17	9.99385061129088e-17	7.17672615336686e-17	7.82017214302112e-17	1.14701368938787e-16	1.00825569165384e-16	1.15673342879796e-16	4.36356048704608e-17	1.48236178184356e-17	7.25221747856478e-18	6.78501387527544e-18	7.281450041574e-17	4.38390275643482e-17	8.54974043137016e-17	1.11192356643626e-16	6.20633901371238e-17
2008189	4	8.33956813316338e-17	5.55947949382043e-17	1.17980078277996e-16	7.52670781678843e-17	8.35212610499572e-17	6.95393630498196e-17	7.51701290558684e-17	1.1631927186469e-16	1.02547712105623e-16	9.42606523607312e-17	4.27275202260212e-17	1.37817515251311e-17	8.24358827179681e-18	5.86054663926971e-18	6.9797760479275e-17	2.72757653451649e-17	1.17570025132571e-16	1.12898414834435e-16	5.93271573328368e-17
2008189	5	9.91313855271607e-17	5.42062587308089e-17	1.18313199211045e-16	7.93683133833088e-17	7.60224636946968e-17	1.18819706869597e-16	7.22362147153821e-17	1.17700971852463e-16	1.06388676054568e-16	8.12415472119132e-17	4.39400003328633e-17	1.28243662897341e-17	1.57195292937038e-17	7.6212663773043e-18	6.78516106770795e-17	9.19613121164595e-18	1.14250664430175e-16	1.14475413081654e-16	5.76642445594164e-17
2008189	6	1.06444039780656e-16	5.47025445212433e-17	1.16176716135045e-16	7.77798692736443e-17	7.37431444895305e-17	1.17057861740594e-16	1.16164469621535e-16	1.19267028070073e-16	1.08379356300129e-16	1.0856427513226e-16	4.53560400708901e-17	1.14103121234435e-17	3.1657145014223e-17	9.88647017558453e-18	6.52127068217995e-17	4.56916445083503e-18	1.12704172227417e-16	1.157679206089e-16	5.69603721580891e-17
2008189	7	1.09608960045281e-16	6.67346874086258e-17	5.79201712326109e-17	7.61602489760545e-17	7.15912864836319e-17	1.14521247525159e-16	1.11814733412444e-16	1.19752651529064e-16	1.05373032505478e-16	1.08500955334272e-16	4.68591426041013e-17	1.05759445264225e-17	4.56163242879517e-17	9.40069170079949e-18	7.01625225730568e-17	2.41349158221872e-18	1.10389679440358e-16	1.17480991730923e-16	5.57486590038403e-17
2008189	8	1.05630424558169e-16	1.13496266199417e-16	1.89011431642675e-17	7.30620559690263e-17	7.18195411404922e-17	1.1025407018972e-16	9.81746499199629e-17	1.17618882604547e-16	1.0336986032778e-16	9.34367878910326e-17	4.77672500057859e-17	9.79769768458115e-18	4.69670373824294e-17	7.82622839768065e-18	7.23656877879149e-17	3.43609224205222e-18	1.09555034993673e-16	1.17177632167474e-16	5.40761625624018e-17
2008189	9	9.6483801782801e-17	1.06119032419058e-16	2.8124936596512e-17	6.86810218869265e-17	8.83788818761708e-17	9.99778126150712e-17	7.41138751390942e-17	1.11072244625619e-16	1.13891494499219e-16	1.06479417662248e-16	4.80410127303692e-17	9.33558999034212e-18	5.20620826491024e-17	8.22175426745155e-18	7.12032277786181e-17	5.22112827976038e-18	1.03299372189502e-16	1.15785210641038e-16	5.20033194675887e-17
2008189	10	8.78465094569775e-17	9.37663645874758e-17	5.33696612597932e-17	6.82820650297279e-17	9.69143107628782e-17	9.57697316303492e-17	1.01730395039517e-16	1.00346526103549e-16	1.15060517075565e-16	1.06106645223516e-16	4.80367174399696e-17	9.7271785639026e-18	5.49296873510719e-17	1.17638948766114e-17	6.90616386671457e-17	9.05724378878177e-18	1.01380568784367e-16	1.15594316766775e-16	6.72742123525434e-17
2008189	11	9.73725565078941e-17	8.13817522154727e-17	1.05532689941702e-16	7.31798344379712e-17	9.60467517741624e-17	1.02614023541322e-16	1.00664166351455e-16	9.52213232573121e-17	1.08783851952634e-16	9.39840579713752e-17	4.75355724803064e-17	1.04593285179626e-17	9.63363785399735e-17	1.27510266128956e-17	6.6656126737758e-17	1.42185189731627e-17	9.79565537960065e-17	1.14769233177876e-16	9.5094098409753e-17
2008189	12	1.02194420671368e-16	7.50674157661481e-17	1.05183362361216e-16	1.15772870595252e-16	9.98367665510461e-17	1.03071964006436e-16	9.22068808103635e-17	9.22830544095088e-17	1.08192116254948e-16	8.65608717554917e-17	4.66763591086863e-17	1.12644222282051e-17	9.60331399369819e-17	1.27307066968967e-17	6.38120459573875e-17	2.56679603940157e-17	9.67747831771097e-17	1.10737486307259e-16	7.56633665011388e-17
2008189	13	1.06324595776448e-16	7.17773551800204e-17	1.05243730474514e-16	1.14697807667939e-16	1.04834635030386e-16	9.55569759295953e-17	8.48993973007192e-17	9.14405048564603e-17	1.13012018761776e-16	8.03450911130495e-17	4.61216976567744e-17	1.16628868438969e-17	7.27803585627145e-17	1.25066172934245e-17	6.37402599375641e-17	1.16240626455757e-16	9.61617562667521e-17	1.10142543112854e-16	7.54301270010414e-17
2008189	14	1.0403604183976e-16	6.98906826919262e-17	8.62437879054353e-17	9.44818433081747e-17	1.06697329110181e-16	8.87658832005058e-17	7.80546702418088e-17	1.03240404504944e-16	1.12592971035525e-16	7.54910280569823e-17	4.57041524725249e-17	1.26034526639993e-17	5.72665288178732e-17	1.30143108727157e-17	8.55178318599102e-17	1.12486823143356e-16	9.49872705182143e-17	1.0952802288458e-16	8.59804922481748e-17
2008189	15	1.07120624874537e-16	6.74942556433976e-17	7.96033407179304e-17	8.45768303946698e-17	9.85528771571787e-17	8.11663954778609e-17	7.35105164812382e-17	9.77532631131112e-17	1.12112019097739e-16	8.42740265494128e-17	4.42817641862713e-17	1.36547830331467e-17	4.80555323488153e-17	1.31424488846543e-17	1.16513136912798e-16	1.10273701621604e-16	9.15976962278257e-17	1.10506712739742e-16	1.0179897341938e-16
2008189	16	1.06411273239955e-16	6.50589196320818e-17	7.6847864895481e-17	7.90094290321361e-17	8.77873870968818e-17	7.65564885829639e-17	6.96880364302892e-17	1.07153871964196e-16	1.12069205132296e-16	9.51538257732899e-17	4.11029121440833e-17	1.44622962684352e-17	4.21704537873164e-17	1.32867285338595e-17	9.31709209660915e-17	1.11034911670623e-16	8.89235343901179e-17	1.07290036143136e-16	8.97963635141155e-17
2008189	17	1.06414422719528e-16	6.4771108675866e-17	7.89570692282452e-17	8.18774402048796e-17	7.92740266917315e-17	7.93798431192711e-17	7.9428315568021e-17	1.0858773424856e-16	1.12273631036027e-16	1.09269658957413e-16	3.67924074788995e-17	1.51578084347143e-17	3.79624938635722e-17	1.43538695716877e-17	6.73160222062507e-17	1.11878726361766e-16	8.72182357235359e-17	1.08405612444231e-16	8.41617177609449e-17
2008189	18	9.80967916920324e-17	7.24297567214477e-17	8.15428953197069e-17	8.7371458257092e-17	7.38181245392406e-17	8.11515762762059e-17	8.06831455209899e-17	1.09215807151133e-16	1.11708097122375e-16	1.09267853488766e-16	3.27728229628174e-17	1.59940798021403e-17	3.4352452510331e-17	1.56357068682177e-17	5.97521194986103e-17	1.15495334592886e-16	8.26793944719141e-17	1.06984949793963e-16	8.92101309330155e-17
2008189	19	8.05839624310415e-17	7.95439932034464e-17	1.04418938436563e-16	8.16656259463278e-17	7.03906395958871e-17	7.80183680028186e-17	7.85368939412417e-17	1.08676289472681e-16	1.11865750751443e-16	1.09336826078612e-16	2.87177648090523e-17	1.71688563960996e-17	3.2209569370146e-17	1.70971129341683e-17	5.56041542177876e-17	1.15819596776648e-16	7.75825165950892e-17	1.07204621670519e-16	9.97621397107791e-17
2008189	20	8.55872241605941e-17	8.10282699936974e-17	1.05355904557398e-16	7.33131572086902e-17	6.8145646746612e-17	7.43997035350144e-17	1.08372870372634e-16	1.06408258014691e-16	1.12032348068139e-16	1.09459554243996e-16	2.51126122940434e-17	1.77328040641247e-17	2.90721681574886e-17	1.84295497110279e-17	5.40461143804325e-17	1.12447863119922e-16	7.40265785850401e-17	1.12364645629268e-16	1.02451800765715e-16
2008189	21	9.4427773757381e-17	8.5855256926158e-17	1.04867758426434e-16	7.09226763105903e-17	6.88827752259064e-17	7.64219153193494e-17	1.08079096549365e-16	1.06127106499323e-16	1.11851302153622e-16	1.09805245845209e-16	2.14976226810463e-17	1.73222292576941e-17	2.56134976916502e-17	1.94003749293043e-17	5.32053697852961e-17	1.11718898942315e-16	7.24584139711514e-17	1.05711138092162e-16	1.06221790125721e-16
2008189	22	8.4392283728743e-17	9.24737859836511e-17	1.04293010085787e-16	7.13329706740682e-17	7.12908914648783e-17	8.13096580545711e-17	1.08406833520081e-16	1.06138733219272e-16	1.12587360694484e-16	9.27498659796634e-17	1.88036424348895e-17	1.66091234225582e-17	2.20958429943584e-17	2.00705145591024e-17	5.25397169909605e-17	1.12339788218049e-16	7.29160131227678e-17	1.07711147509203e-16	1.06137234661588e-16
2008189	23	1.06320789617742e-16	1.07287396774904e-16	1.04964734661993e-16	7.25724844039113e-17	7.12029776036265e-17	8.96808970497601e-17	1.08668963577052e-16	9.95673426459258e-17	1.14171071061392e-16	8.94737284557498e-17	1.66676250187343e-17	1.61266097980467e-17	1.97977658130633e-17	2.04588083175791e-17	5.27130832244332e-17	1.11887535926847e-16	7.55023026728782e-17	1.07090701054694e-16	1.06047496811608e-16
2008190	0	1.05989558990793e-16	1.05602182708926e-16	1.06376796797698e-16	7.51261992626173e-17	7.08275681904231e-17	8.95333513419751e-17	9.70855907460995e-17	1.05964296838786e-16	1.08970541535705e-16	1.06145484890929e-16	1.49924410752895e-17	1.58613834215541e-17	1.93074777669078e-17	2.05987841753642e-17	5.29536717909329e-17	1.11395305030068e-16	1.14730620057408e-16	1.03822733940482e-16	1.05936587449124e-16
2008190	1	9.86099594507976e-17	1.06051433758046e-16	9.38506002022198e-17	7.92608496735075e-17	8.21704489792237e-17	1.08941704814516e-16	9.71458285216531e-17	1.06034748826841e-16	8.58270077294785e-17	1.05742565608338e-16	1.36822452896318e-17	1.57863836166879e-17	1.9113586705307e-17	2.05302838029141e-17	4.62609144729218e-17	1.10544116933991e-16	1.17830025421038e-16	9.92615082288828e-17	1.05459392267197e-16
2008190	2	7.0794902758691e-17	1.06106659138032e-16	1.06028187168447e-16	8.69158988358282e-17	8.89682838981075e-17	1.06856402959262e-16	1.06461735842874e-16	1.05271257872736e-16	5.91963498876631e-17	1.06074083923296e-16	1.25555769662503e-17	1.53885046734366e-17	1.91864729139433e-17	2.02662119685401e-17	1.07986068941111e-17	1.10114167684884e-16	1.02852341748693e-16	1.00434888661229e-16	9.86473830515646e-17
2008190	3	8.04037952819098e-17	1.06005913302475e-16	1.04741275791254e-16	1.07232730222647e-16	1.00654843406974e-16	1.06631516030057e-16	1.06820118763414e-16	1.05660641701165e-16	5.84017191207208e-17	1.05999520645028e-16	1.16648057321984e-17	1.45148622734255e-17	1.95253881889353e-17	1.97933334345581e-17	1.41603062567604e-17	1.09754650722671e-16	9.24416374550756e-17	9.9607616256187e-17	8.50474249155973e-17
2008190	4	8.8612246459265e-17	1.05786362049552e-16	1.04927258392076e-16	1.06796461534835e-16	9.75257443571169e-17	1.06481774463262e-16	1.06185942232346e-16	1.05874705111185e-16	6.42004128067814e-17	1.06447295092188e-16	1.15425506263051e-17	1.3614478682065e-17	1.92487974010535e-17	1.8740396125828e-17	2.85806427731634e-17	1.09029614266136e-16	8.21971682621795e-17	9.66846277440199e-17	1.05954586119792e-16
2008190	5	8.31565357644918e-17	9.7863962367826e-17	9.38525540064339e-17	9.55203731837025e-17	1.00186569376312e-16	1.05700156577324e-16	1.06319843716882e-16	1.0530779103669e-16	5.80454356468826e-17	1.0622899497317e-16	1.16242777744995e-17	1.28578476215634e-17	1.88994819377562e-17	1.64647538197811e-17	5.06306314359959e-17	1.08501394451988e-16	8.04592973789576e-17	9.63468011779822e-17	9.53558789041595e-17
2008190	6	1.0247890549135e-16	9.63809958059575e-17	1.0503777913953e-16	9.08871639245689e-17	1.05237949747684e-16	1.05883582610605e-16	1.06292890159066e-16	1.05549817024233e-16	7.80402088998272e-17	1.0513781888452e-16	1.13069412125339e-17	1.22062549175069e-17	1.90685795123512e-17	1.36217525549609e-17	1.08978993928498e-16	1.07400356398286e-16	8.64200498849326e-17	6.26431715770859e-17	1.06794890923373e-16
2008190	7	1.0794240609041e-16	9.73166324501608e-17	1.05432231161621e-16	1.07553370691039e-16	9.97299747186576e-17	9.26203190834708e-17	1.05751707206101e-16	8.83859892814151e-17	9.99147993334951e-17	9.09032230092487e-17	1.09984803053628e-17	1.25756793492693e-17	2.00010941807505e-17	1.27165328158121e-17	1.09297948207077e-16	1.06538606992036e-16	9.25170369026142e-17	6.36882594800269e-17	1.06502366074009e-16
2008190	8	1.10298350574628e-16	9.74412529241324e-17	1.05483370320263e-16	1.076344711758e-16	8.76742800828658e-17	8.65580454445809e-17	1.04560946960763e-16	5.97982816101121e-17	1.07275755481889e-16	8.0559705680079e-17	1.03740687219549e-17	1.30232070731155e-17	2.16731015271525e-17	1.29986634517586e-17	1.00897225929071e-16	9.74541314822622e-17	1.00719779655505e-16	5.59225670450408e-17	9.3921312315522e-17
2008190	9	1.03446280711924e-16	8.88079734327406e-17	1.05501710605315e-16	8.75357955829992e-17	1.0577833500191e-16	9.50804007498124e-17	8.75806842281357e-17	5.20403185708285e-17	1.07245936138449e-16	5.19813985036548e-17	9.74132249022208e-18	1.35818600163128e-17	2.26788356078321e-17	1.33195021351884e-17	9.42317317092997e-17	8.47476921716482e-17	1.07624135476021e-16	7.48827380483466e-17	9.19096280350621e-17
2008190	10	9.73609846290059e-17	7.2287126566621e-17	9.21292525591494e-17	8.1464552691079e-17	1.00713575495472e-16	9.30859632533463e-17	4.79964872475415e-17	9.63161409645364e-17	1.08771591764499e-16	6.10038382038836e-17	9.2468170038612e-18	1.36070092061071e-17	2.31681327412058e-17	1.35738642101632e-17	9.57735874956226e-17	7.76037072376272e-17	1.07076103481478e-16	9.88463475263948e-17	8.9951242492941e-17
2008190	11	9.55771583989808e-17	7.33681772394137e-17	9.81902488290267e-17	8.17022506302588e-17	6.84941060308849e-17	8.11950524730696e-17	6.17723622768207e-17	1.07084448099081e-16	1.01940075740103e-16	8.65953032834549e-17	8.84237243693679e-18	1.28723983276388e-17	2.54102649359734e-17	1.39032259118873e-17	9.13005193369824e-17	4.78103631021007e-17	1.03299114177198e-16	1.0824205836314e-16	8.3467705680305e-17
2008190	12	9.53019180245886e-17	8.51548374624875e-17	7.21801639968394e-17	7.60991595297449e-17	5.57244413019804e-17	7.18937660065143e-17	1.05721636169298e-16	9.93394748731622e-17	1.0184072803369e-16	1.01635896426763e-16	8.58565964553119e-18	1.22460332003987e-17	2.62789017272557e-17	1.39531697444853e-17	8.46695597059085e-17	7.69438947976794e-17	1.0682063723513e-16	1.08311587005608e-16	8.09490914743101e-17
2008190	13	9.47679720301252e-17	8.77037149769533e-17	9.60520404592092e-17	7.11711642651613e-17	1.00522818415465e-16	6.44943338729545e-17	1.05615708280683e-16	9.30067492873629e-17	1.03176489794532e-16	1.07367003852254e-16	8.51567315056334e-18	1.28504260938396e-17	2.57368861981147e-17	1.37444951422217e-17	1.11954756335523e-16	1.03010502337989e-16	1.07150441504639e-16	1.08663820164889e-16	8.18944871839508e-17
2008190	14	9.770934739969e-17	7.6874582588263e-17	8.55622054091463e-17	6.87127250985254e-17	9.09523914145184e-17	6.83537863132437e-17	1.05501163601434e-16	9.50486384680228e-17	9.50369529223638e-17	1.07069890084124e-16	8.67988273513455e-18	1.7077053525768e-17	2.43790296188259e-17	1.39152454581091e-17	1.02588277515173e-16	1.08881690167171e-16	9.51887138630986e-17	1.07919118853596e-16	7.73136204365594e-17
2008190	15	1.01959381173874e-16	6.96915514317306e-17	9.539253067384e-17	6.84398148407861e-17	8.64799518302557e-17	8.97577521156855e-17	9.97049167965366e-17	1.05890544943256e-16	7.91900121185093e-17	1.07097575649295e-16	9.1622479017114e-18	2.06466453000805e-17	1.77859102824358e-17	1.38962253821304e-17	9.58637780631078e-17	1.094171810526e-16	7.84732449012501e-17	1.06517052473127e-16	7.0393636972651e-17
2008190	16	1.01404204780412e-16	7.15901452194434e-17	1.04948997854778e-16	7.80864081871055e-17	8.65301396969803e-17	9.81949107646694e-17	8.97023140988009e-17	1.0387024799055e-16	8.92643955334976e-17	1.08024148428333e-16	9.91103083007305e-18	2.18097718254439e-17	7.86597163277974e-18	1.4463314285494e-17	8.55356977354262e-17	1.09365605756799e-16	7.33169430320017e-17	1.10810078835762e-16	6.67955098448217e-17
2008190	17	9.85570303040544e-17	7.18455003570505e-17	1.04713755314688e-16	9.53532692030809e-17	8.36838437985401e-17	7.90162862775835e-17	8.42999764991176e-17	9.26824527981637e-17	1.05968467834479e-16	1.07527045575344e-16	1.08767610203325e-17	2.12042501315238e-17	1.2550482766245e-17	1.5820409633575e-17	8.73579684942589e-17	7.31124467280903e-17	7.76338389033773e-17	1.00503551088787e-16	6.49632806009618e-17
2008190	18	9.03795895884656e-17	6.95744113573189e-17	1.0495897630911e-16	8.63110064112554e-17	8.53447974926621e-17	9.2182821881218e-17	8.5830323379369e-17	9.96306934941659e-17	1.06090290439921e-16	1.06291760991152e-16	1.20341305920569e-17	1.71572732923894e-17	1.60293663661248e-17	1.20175113867068e-16	8.57607780964077e-17	1.09546551778485e-16	8.31944758729087e-17	8.86783998532514e-17	7.22601206784725e-17
2008190	19	8.89831786519826e-17	6.19208184757963e-17	1.06350996358026e-16	1.08919054985886e-16	7.58381350185971e-17	9.12718261836176e-17	1.07120467404429e-16	9.51503297197703e-17	1.04744256952936e-16	1.06631263388637e-16	1.30855039446676e-17	2.68307271759125e-17	1.87704629920052e-17	1.16179370121859e-16	8.62639940838094e-17	1.06750842465512e-16	9.36780027010207e-17	6.49051437403706e-17	7.78178780632337e-17
2008190	20	9.11132201491361e-17	5.72596333375006e-17	7.24329873562806e-17	1.08546763884983e-16	8.5672770592041e-17	1.0042453749672e-16	1.06528730055543e-16	9.35672053379006e-17	9.70188817126702e-17	1.06847883164042e-16	1.40462347409435e-17	5.03951547716358e-17	2.28876288332792e-17	1.01260498134842e-16	8.86133038018835e-17	1.07649765004099e-16	1.08535114430381e-16	6.71560318599718e-17	6.91324776415652e-17
2008190	21	9.58182476375963e-17	6.01183588985309e-17	6.20255160464435e-17	9.54801007484159e-17	9.86714585307461e-17	1.02103690677074e-16	1.0732487910016e-16	9.22207802080491e-17	9.34829098545974e-17	8.62342010643755e-17	1.49761845127412e-17	1.17707388946964e-16	2.79675949104313e-17	8.76241337735318e-17	8.61132664518683e-17	1.10013938047508e-16	1.07793071411405e-16	9.16899683950687e-17	1.07281496409824e-16
2008190	22	1.08040438736891e-16	6.48361201018246e-17	5.81710090941403e-17	8.86066520764847e-17	1.01943119308987e-16	9.50485542075996e-17	1.07570021783292e-16	9.2552967989435e-17	9.37307881426449e-17	8.16868919142297e-17	1.91563272996122e-17	1.18852218933929e-16	3.17327217798385e-17	7.93073862954494e-17	8.25428227837035e-17	1.10533784642829e-16	1.0993030482409e-16	9.32343749834626e-17	1.07393433216209e-16
2008190	23	1.09080896049091e-16	6.90902020816631e-17	5.67082772282241e-17	9.14691755234817e-17	9.33832544291353e-17	8.4976787356024e-17	1.0785892983833e-16	9.44552248836733e-17	9.57798459621705e-17	7.85075025661015e-17	3.63529670085439e-17	1.1894020601608e-16	3.22410143693524e-17	7.36035342833577e-17	7.95646064170427e-17	1.10770150204353e-16	1.12185465473544e-16	1.07162972211645e-16	1.07392827932172e-16
2008191	0	1.05147681176243e-16	7.19848156898717e-17	5.61168386039321e-17	8.02530031063775e-17	8.66246072248309e-17	1.0919166469601e-16	1.08984472267848e-16	1.0173792044144e-16	1.01266855915357e-16	7.05517890771024e-17	5.65105508409143e-17	1.19570611452186e-16	3.04855860776833e-17	6.86671226949033e-17	7.78547898870848e-17	1.10899176686808e-16	1.13790588426954e-16	1.07526340403922e-16	1.0716356660829e-16
2008191	1	9.92971051175744e-17	7.03420566146521e-17	5.69121891506738e-17	6.61924508434992e-17	8.43287039217551e-17	1.07462732636918e-16	1.14125935192502e-16	8.89183232068922e-17	1.08001370460295e-16	6.78255871615561e-17	7.7582147135993e-17	1.18952423893475e-16	2.97545310378452e-17	6.38558042796542e-17	8.59950981365934e-17	9.41179225505781e-17	1.11159635385987e-16	1.07866750182069e-16	1.0757278969029e-16
2008191	2	9.87735261528413e-17	7.1716161186444e-17	5.85424321817909e-17	6.36479118305173e-17	8.8398031794042e-17	9.16850984794184e-17	8.40972413860555e-17	8.89742579849367e-17	1.08108063044895e-16	6.73260587505302e-17	9.00231930516927e-17	1.17938010837178e-16	3.38417223399937e-17	5.94371579256977e-17	8.95721039933575e-17	9.74546137668288e-17	1.02919173528539e-16	1.07723647189448e-16	1.07072602162875e-16
2008191	3	1.0457684355825e-16	7.81455265975045e-17	5.95517172475935e-17	6.80785725022892e-17	9.97238310526354e-17	8.80124103527307e-17	7.61825167464946e-17	9.71824117112873e-17	1.0921951934025e-16	6.61577229165101e-17	8.3243580521953e-17	1.18604859847539e-16	3.9777664714629e-17	5.46087193790952e-17	8.05611381243705e-17	6.13508643116348e-17	1.03335256138916e-16	1.08091216529549e-16	1.07471584750384e-16
2008191	4	9.97403255664116e-17	1.09947843252302e-16	5.96944124209892e-17	6.85147695391437e-17	1.06633788738579e-16	8.82747054827979e-17	7.43516348572638e-17	9.70346350965035e-17	1.09446417335169e-16	6.51715262798504e-17	6.46775760676915e-17	1.1891199366252e-16	4.38648712432881e-17	4.97374484090821e-17	7.53798318481009e-17	1.07705530256557e-16	1.07649701069226e-16	1.09358639675586e-16	1.07219684895418e-16
2008191	5	9.59229139073788e-17	1.10544613495159e-16	6.04791293980567e-17	6.91668832336515e-17	1.00042043835586e-16	8.93518659826787e-17	7.37407076176415e-17	9.7704033536298e-17	1.08417992566393e-16	6.5287655423952e-17	4.64631630400388e-17	1.17225782525873e-16	4.85245724566127e-17	4.94174725154448e-17	7.24825021823604e-17	9.59464813307966e-17	1.07326955485765e-16	1.11053362034195e-16	1.06026152993401e-16
2008191	6	1.02906998983678e-16	1.02934514835852e-16	6.60473221020643e-17	1.08489300103556e-16	8.93728133245729e-17	8.44956957435329e-17	1.18439241828469e-16	9.58677766908771e-17	1.07498939600854e-16	6.98369225611712e-17	5.10217556368736e-17	1.1299614624473e-16	5.63985721388066e-17	4.74973175401893e-17	7.05020341643953e-17	1.01437514969932e-16	1.0716893640461e-16	1.12140864191069e-16	1.06294164534997e-16
2008191	7	1.09675052589474e-16	1.07681812221466e-16	1.19551698725214e-16	1.07214667572116e-16	7.95852264264587e-17	8.1463179222072e-17	1.15786111614236e-16	9.77493815955524e-17	1.07052058639691e-16	7.22165453134431e-17	7.44195002534608e-17	1.10197343717054e-16	6.26407643130784e-17	5.17178293577683e-17	7.27048116196348e-17	9.55349920109542e-17	1.00955902387211e-16	9.98439859113821e-17	1.06476865130236e-16
2008191	8	1.11106064693367e-16	7.56716996507242e-17	1.11655934424676e-16	8.52605468827262e-17	7.24272878608712e-17	8.16013481918705e-17	1.09271927088531e-16	1.014478872537e-16	1.08179004997631e-16	1.15651818439182e-16	8.73399100212618e-17	1.09431236473817e-16	6.61392267029351e-17	1.23140163808271e-16	5.30019535412014e-17	8.46878765846668e-17	8.32242653015146e-17	9.2516854123214e-17	1.02670279172482e-16
2008191	9	1.06525372464006e-16	6.9230720453551e-17	1.00775840135106e-16	9.32731905633653e-17	8.7473117249182e-17	8.54849691293198e-17	1.01693149692074e-16	1.06329811472906e-16	1.08245208181508e-16	1.04322659502757e-16	9.36856216334996e-17	1.07952558913807e-16	6.54240844367992e-17	1.20793473723988e-16	2.34585209913883e-17	8.34540716313784e-17	7.85972167035159e-17	8.85023108882806e-17	9.46033581020537e-17
2008191	10	1.02442640426298e-16	6.56809844065842e-17	8.216752014834e-17	8.81171473554591e-17	1.07067630809207e-16	8.6106416477085e-17	9.66923462358237e-17	1.07284367053637e-16	1.06871016459925e-16	9.80337679496485e-17	9.66460736935237e-17	1.08715418104836e-16	6.38766256434547e-17	1.15489150951693e-16	2.70568588686882e-17	9.97048473203752e-17	8.34005495773805e-17	8.62041118514535e-17	9.03103082429147e-17
2008191	11	9.98371340072702e-17	6.09169371351434e-17	7.07031643144471e-17	6.6457885273699e-17	1.02952375674566e-16	8.30837006608099e-17	9.3533909215942e-17	1.03579084919584e-16	1.04869872682466e-16	9.21917793957713e-17	1.13005927171159e-16	8.1998191432876e-17	6.27871028210265e-17	1.10282332620212e-16	8.72742907474544e-17	9.85251618443457e-17	8.85505642305604e-17	8.50244536392689e-17	8.59782199477461e-17
2008191	12	9.6729011094252e-17	5.79654543143381e-17	6.31106175515054e-17	4.04230593796178e-17	9.98195705086769e-17	7.75280882387411e-17	9.07183446269403e-17	1.00219570669251e-16	1.01818687028549e-16	8.75943633394774e-17	1.11197950856034e-16	6.35418128693508e-17	1.09115569147968e-16	1.06395539593165e-16	7.87521831399e-17	7.98415520998044e-17	9.12524785437784e-17	8.4319434690253e-17	6.56571054544894e-17
2008191	13	9.33150962436458e-17	5.66558125767441e-17	5.79251713388867e-17	1.64057992554629e-17	9.71819339213527e-17	7.19524848559221e-17	8.69709173793707e-17	1.07152308982789e-16	9.89697446071267e-17	8.57772659194777e-17	1.12049966203363e-16	5.6072836214657e-17	8.76888065397735e-17	9.98112220901698e-17	7.52928234079602e-17	7.3567079480722e-17	9.22584351805098e-17	8.33427155856432e-17	3.85997818829437e-17
2008191	14	9.43737341755404e-17	5.46433272947949e-17	5.41875036784196e-17	9.20301353509222e-18	9.28532999648118e-17	6.57910139264618e-17	8.28556066004652e-17	1.08505105477148e-16	9.57036008686248e-17	8.3077715367252e-17	1.11710572372947e-16	5.36206906959322e-17	7.62951602336617e-17	9.24655058752394e-17	7.35775158875628e-17	6.8997897807802e-17	9.54419858378988e-17	8.23419755197053e-17	1.90390180843736e-17
2008191	15	9.86518791270392e-17	5.20648013188945e-17	5.13462942936284e-17	1.95260841884146e-17	1.0109516691136e-16	6.1071983831651e-17	7.84020919863213e-17	1.03659198075188e-16	9.2879815400446e-17	8.00976905008202e-17	1.12571128503854e-16	5.54930796751527e-17	7.31807747216865e-17	8.39317361335014e-17	7.22102955022311e-17	6.45620663250157e-17	9.82356966935266e-17	8.15641885355191e-17	5.41210652428312e-18
2008191	16	9.93269440225503e-17	5.39561946226736e-17	4.88792254905439e-17	4.92154395402613e-17	1.0347882761746e-16	5.74154717697413e-17	7.3503569130498e-17	9.74455658068331e-17	9.0016067958084e-17	7.60020920190392e-17	1.10055812235001e-16	5.2526152001877e-17	1.18414776426025e-16	7.53538011010936e-17	1.088203919399e-16	6.07411932775541e-17	9.56753706826585e-17	8.04539093024726e-17	8.61172482936462e-19
2008191	17	1.02976740358432e-16	6.16064884410679e-17	4.73177963639454e-17	8.0613821345208e-17	9.54828640400435e-17	5.53279195616041e-17	6.84226600138414e-17	9.17502319645847e-17	8.78423775916397e-17	7.26129386855553e-17	1.14536154188515e-16	5.12054330256468e-17	1.050867232827e-16	6.8489856791472e-17	1.10667698701911e-16	5.65427715798805e-17	9.27230629624406e-17	7.86822637356773e-17	3.5296398388251e-19
2008191	18	1.12658401470951e-16	6.08679187243901e-17	4.4021565579079e-17	1.05412838070403e-16	9.41780381138713e-17	5.30841928009696e-17	6.24882218082779e-17	8.33353565838918e-17	8.49553404692164e-17	7.04016212347918e-17	1.16025254859957e-16	5.12206597407993e-17	1.23113935226109e-16	6.33392970992105e-17	9.48108137457309e-17	5.35871131124464e-17	8.98027804159136e-17	7.65895515045141e-17	2.92917363229801e-18
2008191	19	1.12599735396406e-16	6.93814267072772e-17	4.12247565062833e-17	1.05924379090026e-16	9.76639022748504e-17	4.87233677988665e-17	5.84476116920735e-17	7.58401426957961e-17	8.21388272703163e-17	6.80296084633732e-17	1.18900067920671e-16	6.95616193664693e-17	1.23249669611105e-16	5.77106606314305e-17	8.64600574158083e-17	5.07952660957775e-17	8.66677219230833e-17	7.44688203391668e-17	4.41569296180632e-18
2008191	20	1.12589353845546e-16	1.10470003366888e-16	4.07065068587805e-17	1.05684142412296e-16	1.09909273764266e-16	4.14272664196269e-17	5.9025905492172e-17	7.0861071652279e-17	7.90308322802723e-17	6.63137968010251e-17	1.14995610664116e-16	1.05622179956608e-16	1.22150701509021e-16	5.37550942710922e-17	8.67892599112631e-17	4.79753435163427e-17	9.36550914529164e-17	7.2724550920318e-17	3.47147950703374e-18
2008191	21	1.12532727494236e-16	8.88335757261117e-17	4.05979293396515e-17	1.06498544976075e-16	1.10540401585477e-16	5.56410653995128e-17	6.35048026160181e-17	6.79375622258532e-17	7.52004648697398e-17	6.39659192791751e-17	1.15947053505258e-16	1.07421648933389e-16	1.03168374837991e-16	5.256542407723e-17	8.68819305096975e-17	4.50967068190687e-17	1.10082906887613e-16	7.05320742200063e-17	2.60857969756485e-18
2008191	22	1.11571797208029e-16	6.63635417309055e-17	4.03960114693054e-17	1.08591862096338e-16	1.11970405688672e-16	7.70810301809492e-17	6.24597428252946e-17	6.79422547547446e-17	6.99775056478202e-17	6.12985730785683e-17	1.22823956445951e-16	1.09645205172904e-16	9.81086597192858e-17	5.38309353026904e-17	8.62164439687199e-17	3.99203568389905e-17	1.10524143822501e-16	6.83655659122626e-17	1.67540035177033e-17
2008191	23	1.1171158432686e-16	4.13321741514411e-17	4.00558929971369e-17	9.4895925172416e-17	1.15590124508438e-16	6.380768675087e-17	6.10422233771582e-17	8.79795713528896e-17	6.50100524245795e-17	6.03527856192953e-17	1.22256617513003e-16	1.13892794816083e-16	9.47603126031414e-17	5.47890555035157e-17	8.10998986321457e-17	4.81318602770029e-17	1.11292015611445e-16	6.71616533331624e-17	4.81145073293969e-17
2008192	0	1.11415426298773e-16	2.24346077338604e-17	3.98293771762786e-17	8.174580494944e-17	1.11903017498005e-16	6.87997780383782e-17	5.85511836090907e-17	1.12177434719681e-16	6.35484972279432e-17	6.09538604453354e-17	1.22136840846781e-16	1.16991654653302e-16	9.15557922289047e-17	5.5367313341716e-17	6.95660495690817e-17	7.18829852659167e-17	1.12540038186346e-16	6.73827074809053e-17	5.26072094655982e-17
2008192	1	1.11555230224632e-16	1.24991516840821e-17	3.96202163779667e-17	7.78092034337071e-17	1.10539666730223e-16	2.75373656729498e-17	5.86098199025092e-17	1.12506186456336e-16	6.63855487823482e-17	6.1818665612532e-17	1.22276067351709e-16	5.1782029121454e-17	8.97285541475334e-17	5.58142034603808e-17	5.06108521122506e-17	6.89782618279893e-17	1.12913591478871e-16	6.95365158497952e-17	5.21287820595034e-17
2008192	2	1.1272881123165e-16	8.59217755091781e-18	3.94215184997948e-17	7.28594674202589e-17	1.09808341406657e-16	1.72324729987336e-17	5.94811658086333e-17	1.13550982826933e-16	7.05661763213654e-17	6.34953707123865e-17	1.2315470296406e-16	3.41915960383314e-17	8.83486189961902e-17	5.6279134115621e-17	3.73844382288696e-17	6.18410955844421e-17	1.13127964537324e-16	7.2785515278229e-17	5.10813537460616e-17
2008192	3	8.88642960132585e-17	7.41638313375692e-18	3.90670795528916e-17	6.70147827588914e-17	1.10977503390919e-16	1.36806922267882e-17	6.13170862488605e-17	1.1412859151607e-16	8.10568421800029e-17	6.65284031446796e-17	1.24503095515514e-16	3.01927056433724e-17	8.62347356564715e-17	5.70504727487955e-17	1.0922253549082e-16	5.40176481083014e-17	1.13839502981015e-16	7.94869847113682e-17	5.05000950771434e-17
2008192	4	4.78062690880723e-17	6.32961111007333e-18	3.89600405675427e-17	5.84053880750801e-17	1.12652919927577e-16	1.80668484266305e-17	6.7376309830536e-17	1.13622848652386e-16	1.13202981097769e-16	6.82416466745627e-17	1.22844844934849e-16	3.08737058604366e-17	8.34638864953641e-17	5.75241692327037e-17	1.11716978838687e-16	4.6727568925512e-17	1.14298041529558e-16	1.17571140877729e-16	5.06725597073868e-17
2008192	5	3.36919395824202e-18	5.5962503166291e-18	4.11150017684682e-17	4.88248067950883e-17	1.15194862054596e-16	2.96823282693899e-17	7.1159047920783e-17	1.17338940048065e-16	1.13114597546346e-16	7.31433572203752e-17	1.22771346957229e-16	3.26765375674785e-17	7.9695572504707e-17	6.24130689676906e-17	1.02528170600576e-16	3.95426395532191e-17	1.13196332423502e-16	1.17065857695252e-16	6.36844671092443e-17
2008192	6	2.46667427833543e-18	3.42872567188577e-18	4.32788614294815e-17	4.21946513797963e-17	1.16817149814289e-16	3.65719940052078e-17	7.9113386347954e-17	7.2035286933222e-17	1.1434687658223e-16	7.96993589668799e-17	1.2271025147434e-16	3.61173228387457e-17	7.94549488001634e-17	1.22651143670632e-16	9.75994730383314e-17	3.24862119279791e-17	1.11382757591994e-16	1.16200056923136e-16	5.6789079691785e-17
2008192	7	6.25047308064445e-18	2.36733222276995e-18	4.5704365134197e-17	4.05665229987501e-17	1.18329298225145e-16	3.77954551527756e-17	8.37108620251084e-17	4.60631795528262e-17	1.15129391950389e-16	7.52553659290056e-17	1.22853079727661e-16	4.74111475677785e-17	7.75500542457129e-17	1.23125966671519e-16	7.88549972681841e-17	1.69254949822675e-17	1.09633927502175e-16	1.14923867873331e-16	3.65165684462382e-17
2008192	8	1.61512771141087e-17	1.166862292206e-17	1.22315045531731e-16	3.08222363133195e-17	1.16397966769075e-16	3.4362226698822e-17	8.33826035771125e-17	1.11463621983012e-17	1.1570406190866e-16	6.01863755361399e-17	1.22771989890469e-16	7.16401038647644e-17	1.22105055123616e-16	1.2327130762556e-16	8.430979780954e-17	5.64208584106129e-18	1.08498881464481e-16	1.13605046730458e-16	9.08080700642696e-18
2008192	9	2.46673445245207e-17	2.65162188890311e-17	9.42287845648735e-17	2.11432961568805e-17	8.5156010928521e-17	3.39600901881381e-17	7.12217319315476e-17	1.61714050775582e-18	1.16150714678579e-16	5.02678099076425e-17	1.22761549840941e-16	8.51814058844604e-17	1.07636147619422e-16	1.2325171363661e-16	9.25376690721416e-17	3.15489892778016e-18	1.05712336117828e-16	1.13635231221234e-16	2.33414053880481e-18
2008192	10	3.5103645953873e-17	1.1216549566153e-16	5.80696188520151e-17	1.34441171455041e-17	3.97255735442601e-17	3.69674023846129e-17	5.24482157167291e-17	2.81958335232115e-18	1.15690791050853e-16	3.86793469918053e-17	1.21669957928239e-16	9.30539198001741e-17	9.69348947334109e-17	1.24183686005137e-16	1.02369202694612e-16	4.57515911546841e-18	1.01184139332567e-16	1.14550489937555e-16	6.08934927182975e-18
2008192	11	4.50337290332662e-17	1.12433908891955e-16	4.17603321364487e-17	8.45753230657758e-18	9.80299578954117e-18	4.33243014934511e-17	3.44750659279514e-17	5.70335801948637e-18	1.12698714427483e-16	2.65244635236277e-17	1.19087261370937e-16	9.22968849969058e-17	8.92890989725652e-17	1.22358312312007e-16	9.56514194869174e-17	8.27806750296996e-18	9.92915547657984e-17	1.15515553655737e-16	1.21513036832459e-17
2008192	12	4.77498733362824e-17	1.02431679834222e-16	3.45829423106845e-17	8.22828175914148e-18	1.78713501394881e-18	1.20122526926298e-16	2.24461255223459e-17	8.67366847072572e-18	9.48650768667018e-17	1.98027616758408e-17	1.17066186087735e-16	1.02152661610992e-16	8.2695014104437e-17	1.12039959873474e-16	8.7207527775116e-17	1.32552991923853e-17	9.41861050178397e-17	1.16219732146505e-16	1.86255558645637e-17
2008192	13	5.08935850175475e-17	1.13073031384137e-16	3.24781478660018e-17	1.40144506454992e-17	8.09250296958891e-19	1.19852259994665e-16	1.67084848337795e-17	1.58746519358838e-17	6.88897141727027e-17	1.83878566740834e-17	1.1683791619966e-16	9.63418838511513e-17	7.68340673813189e-17	8.63369859215709e-17	7.93503857050265e-17	1.80495777832956e-17	9.05120890242873e-17	1.13372184890236e-16	2.57613606067646e-17
2008192	14	5.92174260719119e-17	1.12329944169375e-16	3.2286156858099e-17	4.76632134138158e-17	1.8296388822126e-18	1.0652206253095e-16	1.42605117816143e-17	1.63687201865859e-17	4.56471848083941e-17	3.49323121648003e-17	1.19196919282159e-16	9.92937209330018e-17	7.29627192241187e-17	6.90160844597181e-17	1.05409249389905e-16	2.29350762514955e-17	8.77188301037018e-17	9.41402082710822e-17	3.86694949833726e-17
2008192	15	1.08164179463727e-16	1.11927538096724e-16	3.24570018510894e-17	1.14756540084365e-16	1.18674919648175e-17	8.81344723397823e-17	1.66964275798197e-17	2.43817483434655e-17	2.78483404727467e-17	1.01487781676904e-16	1.20808834346226e-16	1.11289221659069e-16	6.81587038427905e-17	6.18522571027249e-17	1.05500322019176e-16	3.811408525736e-17	8.51617699893324e-17	7.39998063788273e-17	1.05452143117211e-16
2008192	16	1.07967661880919e-16	6.3096339590074e-17	3.2103612497284e-17	1.14712362413208e-16	2.82498061810847e-17	7.81261224503515e-17	4.80621360546102e-17	3.32551181235785e-17	1.02167235527521e-16	9.58333248213992e-17	1.18021584739178e-16	1.107076226896e-16	6.46206922291812e-17	5.74975007130681e-17	8.90482819907676e-17	1.2045294975922e-16	8.12717287030812e-17	5.77183226534061e-17	1.05427998732099e-16
2008192	17	1.07983554448294e-16	3.37724199151334e-17	3.12415005094806e-17	1.15291043318193e-16	2.37483701437091e-17	7.34665205597743e-17	7.62647526096401e-17	3.64077681052842e-17	1.03365147373249e-16	9.77095202252022e-17	1.13289182497828e-16	1.09955510499209e-16	6.22049501708304e-17	5.46343970163796e-17	7.84673625765239e-17	1.20164534552417e-16	7.69950905124787e-17	6.55584262963512e-17	1.05446849056743e-16
2008192	18	1.07826415252747e-16	1.22535754243515e-17	2.96324237602234e-17	9.47872337422358e-17	1.95047465747694e-17	7.11195518761015e-17	9.95724380862498e-17	3.37662328415643e-17	1.05093836280663e-16	1.07546378142991e-16	1.12516879598405e-16	1.08861847050068e-16	6.54141599747773e-17	5.21971538314167e-17	6.76199858260501e-17	1.20072779985727e-16	7.22086834188847e-17	8.33106302850032e-17	1.05981901181339e-16
2008192	19	1.07711261248311e-16	1.80491104051137e-17	2.8104651671289e-17	8.09648804529725e-17	2.88433861914358e-17	6.86450688028001e-17	1.0249666419352e-16	1.06886918610494e-16	1.03673701874961e-16	9.68416180958081e-17	1.13285966521587e-16	1.0751503925614e-16	6.93983595052148e-17	1.12115435659444e-16	6.05131903303093e-17	1.06135356020012e-16	7.01897905627571e-17	9.59303891799109e-17	1.0672611597673e-16
2008192	20	1.07942104128363e-16	2.76135124900671e-17	2.6864884239885e-17	5.67857093218004e-17	5.00518997959224e-17	6.50114362618266e-17	1.0645206407305e-16	1.06993312761253e-16	7.61786412932572e-17	9.80418743743741e-17	1.14141993112935e-16	1.06678622381418e-16	7.71128660010986e-17	1.11551753190272e-16	5.83522464229179e-17	9.71863357837562e-17	6.88117710438192e-17	9.8485844262576e-17	1.07374846492935e-16
2008192	21	1.08026695695907e-16	1.03977397539429e-16	2.64221966713112e-17	3.79413120469274e-17	5.08974368580216e-17	6.17108267437895e-17	1.0673397294286e-16	1.07121694054078e-16	8.67189801853103e-17	1.07651288090683e-16	1.22614280277601e-16	1.0800088942879e-16	8.38455836225149e-17	1.19609024529244e-16	5.7422775368599e-17	9.14089865327546e-17	7.21279030678649e-17	9.93682637279739e-17	1.09485689716799e-16
2008192	22	1.0807026759281e-16	3.52117093300725e-17	2.60514697609673e-17	3.9651648923285e-17	1.07859551314128e-16	5.96103694323475e-17	1.0679354278314e-16	1.07149719095483e-16	1.00574199364271e-16	1.07869997122026e-16	1.22855933827506e-16	1.09499509719666e-16	1.09957137695446e-16	1.19688855533942e-16	5.60938049186828e-17	8.77782751453261e-17	7.2856331422924e-17	7.17263266013151e-17	1.11554874948071e-16
2008192	23	1.08167308359362e-16	1.49214840724282e-17	2.5823285454816e-17	4.12571235717423e-17	1.07591643140117e-16	5.84170145013271e-17	1.07530251991277e-16	1.07318028503688e-16	1.07068170261431e-16	1.0761357964988e-16	1.22751926079288e-16	1.10618779020243e-16	1.17099349629855e-16	1.21289139828927e-16	5.81267599622782e-17	8.31471748308908e-17	5.63971119375997e-17	9.23626959536841e-17	1.13459534807899e-16
2008193	0	1.08243530420673e-16	1.7847045425162e-17	2.49157714970193e-17	4.07891522387522e-17	1.08457705031973e-16	5.65382883714556e-17	1.077273116166e-16	1.07356736200395e-16	1.06759984703354e-16	1.07101460506325e-16	1.22710792427849e-16	1.13533548312484e-16	1.17071480028656e-16	8.84930086251478e-17	5.69307118943013e-17	7.43427832061554e-17	3.53714512062339e-17	9.47302057455059e-17	1.15631044228455e-16
2008193	1	1.07941136417711e-16	2.36013060066328e-17	2.40140470231798e-17	3.36549163561623e-17	1.02656270448768e-16	5.40295152705066e-17	1.07962417530923e-16	1.07353307960535e-16	1.08373375658823e-16	1.06904058848057e-16	1.22336537002689e-16	1.18702564149166e-16	1.17049899913031e-16	8.21935859954581e-17	5.52430524043746e-17	6.3068733834116e-17	5.26352276379302e-17	9.8245366633696e-17	1.19502112776062e-16
2008193	2	1.07878091256968e-16	2.85948926589548e-17	2.30541882130416e-17	3.0772927017424e-17	4.8084840746371e-17	5.37329412972651e-17	1.09037206636655e-16	1.07632878418232e-16	1.07346245733634e-16	1.06879704754955e-16	1.21630624541869e-16	7.24885374022392e-17	1.16775209065407e-16	7.76756988315507e-17	5.38022502266292e-17	5.39612033162452e-17	7.24460200348103e-17	1.07822203695229e-16	9.35275413830366e-17
2008193	3	1.02446468254396e-16	7.44459127955285e-18	2.22484278951471e-17	3.32510980731427e-17	2.27779581786479e-17	5.26379955388865e-17	1.09925183567404e-16	1.08122864494235e-16	1.05004616483247e-16	1.07014960399586e-16	1.22231567259168e-16	6.15608420744747e-17	1.16099322653888e-16	7.39024152492682e-17	5.28711371625467e-17	4.76330116837338e-17	6.6392958158112e-17	1.07866045746718e-16	8.42536035225441e-17
2008193	4	9.52906835444561e-17	2.22187723841298e-18	2.1633696106869e-17	3.66328015909868e-17	1.07752952304491e-16	5.11060979221446e-17	1.00625237405913e-16	1.08990703056566e-16	1.07684191810592e-16	1.06849446244378e-16	1.22378576596058e-16	5.77274523838675e-17	1.18378047495829e-16	7.06824402865116e-17	5.50259937019378e-17	4.34609834948161e-17	5.94324027168051e-17	1.07990459475373e-16	7.82152462936823e-17
2008193	5	1.00617009664684e-16	3.03264200186044e-17	2.11792141663202e-17	4.12294107128623e-17	1.01591012610978e-16	4.90952112546141e-17	8.27288360128753e-17	1.09427584915179e-16	1.08002766334774e-16	1.06883735966916e-16	1.21262056442001e-16	5.2741106542264e-17	1.0869674085209e-16	6.6257226717978e-17	5.52395011793518e-17	4.04325718251493e-17	5.56342958232357e-17	1.07955264173603e-16	8.27831763418215e-17
2008193	6	9.86764241980004e-17	5.97262708977589e-17	2.08118560602156e-17	5.0057309528168e-17	9.70292447410609e-17	4.75523084248203e-17	8.21460981874788e-17	1.08991464431764e-16	1.08130283866988e-16	1.06761678025988e-16	1.171795891466e-16	4.7542013121095e-17	8.8362451481783e-17	2.94904809764944e-17	5.38828223042396e-17	1.22980212650056e-16	5.20258320481283e-17	1.08059073662824e-16	1.0347273923144e-16
2008193	7	8.74932284749577e-17	1.15131725416122e-16	2.13225659364269e-17	5.49167273322092e-17	7.4784731771965e-17	4.5334710223145e-17	1.05585819102035e-16	9.71112715577548e-17	1.08074805916349e-16	9.64454296798071e-17	1.13987500154338e-16	4.46602624329188e-17	9.36675935587331e-17	3.27916228910475e-18	5.15311890105734e-17	6.27851107679747e-17	4.32582521963763e-17	1.08401717723651e-16	1.06623508211954e-16
2008193	8	7.99771806673806e-17	1.07732726706045e-16	2.19688792483008e-17	5.39774256035811e-17	9.93239554579151e-17	4.38484202439153e-17	1.0539549670137e-16	1.01871454592111e-16	1.08527854526394e-16	7.65526100853359e-17	1.11566897627193e-16	4.75827399387483e-17	8.60029295165564e-17	1.07860649211914e-16	5.55617190646136e-17	4.64423882429272e-17	4.0020003422744e-17	1.08172726169844e-16	1.06051752176495e-16
2008193	9	9.02313272701684e-17	6.82940406027298e-17	2.37317176395041e-17	1.22280782830628e-16	1.0784565902497e-16	4.49298151953703e-17	9.36963528989089e-17	1.0615576273464e-16	1.09658675757696e-16	7.21964985282199e-17	1.10875548669382e-16	5.72435138589689e-17	9.39853076330477e-17	1.04073305255492e-16	6.03174649365178e-17	4.45804761776634e-17	1.12523556801113e-16	1.07932208861847e-16	1.05427755563545e-16
2008193	10	9.24088905332981e-17	8.08889959680458e-17	3.02391625382284e-17	1.09187460911331e-16	1.0768760345804e-16	5.04016297978933e-17	9.20164448579743e-17	1.06582887876741e-16	1.09710515961077e-16	7.19911193374063e-17	4.19085967292188e-17	7.57801934419036e-17	1.0946201522317e-16	1.10176055545132e-16	6.20664419504775e-17	4.35865394307426e-17	1.13306610780765e-16	1.07870211960086e-16	1.05512662722706e-16
2008193	11	9.91065483807551e-17	8.77454404454765e-17	5.94421547605942e-17	1.06989029210547e-16	1.06705820627724e-16	6.25514191281772e-17	6.61314446806628e-17	9.78654019205526e-17	1.05260968122201e-16	9.51145276684321e-17	4.74153692344202e-17	8.96549315993212e-17	1.10326121757393e-16	1.10215200396613e-16	5.96557622122719e-17	4.26654781638972e-17	1.14721593155269e-16	1.08406283366721e-16	1.05399476341857e-16
2008193	12	9.97290429979592e-17	9.03037623019386e-17	1.19922012501068e-16	1.21517464507335e-16	1.0637524793866e-16	1.10615410313307e-16	7.85787876274631e-17	9.07220821268241e-17	1.09479297199681e-16	1.06874827980979e-16	6.69121396899579e-17	1.21791315755776e-16	1.17684853857517e-16	1.10400118792101e-16	5.69249236440087e-17	4.25624243238787e-17	1.16141984048992e-16	1.09379955674992e-16	1.05525243581561e-16
2008193	13	1.07431918007323e-16	9.69676607144396e-17	9.84655595768103e-17	8.89509758384766e-17	1.08256835523695e-16	1.05552129529963e-16	1.03374446152728e-16	8.68696275337765e-17	1.07627717784861e-16	1.04786678258081e-16	1.08302990742329e-16	1.21737789943851e-16	9.93431873298546e-17	1.10191647902015e-16	1.02950472203591e-16	4.0982760310314e-17	1.224195221594e-16	1.10671315027986e-16	1.0536569863002e-16
2008193	14	1.07579971066189e-16	9.51573205759088e-17	1.01191077270503e-16	7.43088097472135e-17	9.1935417078722e-17	1.187777320443e-16	1.03218009741772e-16	8.50176073600712e-17	1.03235780222959e-16	9.72145228762028e-17	1.0962500944385e-16	1.2161985868931e-16	7.69411580258826e-17	1.09297956854367e-16	7.62997060512179e-17	3.91044586153507e-17	9.70978499905187e-17	1.08266665854712e-16	1.05181258825074e-16
2008193	15	1.0978152515323e-16	9.41080523694136e-17	1.00799767357255e-16	7.14881257809296e-17	8.22211388562523e-17	1.11781157815071e-16	9.51892271151422e-17	9.09068080642017e-17	1.06525111150878e-16	1.02734936786186e-16	1.09592568661901e-16	1.05780891152264e-16	7.04530716025763e-17	1.09267943395066e-16	7.28103857437194e-17	3.63073805243133e-17	1.05445540880428e-16	1.06978731215539e-16	1.05031172962138e-16
2008193	16	1.10005416880496e-16	1.00205566614155e-16	1.04083332539891e-16	7.487810291586e-17	7.58240723631807e-17	1.08111230384773e-16	9.85621364487835e-17	1.07966179503835e-16	1.06375489560796e-16	1.06362847555635e-16	1.10607499168543e-16	8.97533041906759e-17	8.57313151413822e-17	1.09841922306347e-16	7.14117466641877e-17	3.49753215703375e-17	1.16612608339099e-16	1.03754929379674e-16	1.04883207263673e-16
2008193	17	1.09157874128867e-16	1.01022294887549e-16	1.06716768635493e-16	1.10164834704019e-16	7.16470895935556e-17	1.0446091404386e-16	1.05541309603592e-16	1.07525954237866e-16	1.06855883200463e-16	1.07086356776861e-16	1.11723531040947e-16	8.30074144501794e-17	1.01984153069663e-16	1.06515879088446e-16	6.71337018834782e-17	3.36015733868865e-17	1.06959281727706e-16	9.68111159078349e-17	9.71756867457391e-17
2008193	18	1.06508167785665e-16	1.04013290253861e-16	1.07061039809598e-16	1.19828610802089e-16	7.99748638756318e-17	1.00046512292264e-16	1.05392607179098e-16	1.08612160604282e-16	1.0758780042532e-16	1.06222924450973e-16	1.1097466292735e-16	7.95455934217308e-17	1.07746054223739e-16	1.04502044277651e-16	6.34338025318666e-17	3.0570372180554e-17	1.0712595057647e-16	1.06716327908014e-16	1.05485407924973e-16
2008193	19	1.03475584497341e-16	1.07836260636958e-16	1.09798509414901e-16	1.20347087814869e-16	1.09622424000245e-16	9.21733487231179e-17	1.05626684515841e-16	1.04727682648463e-16	1.08078867107971e-16	1.06429382490593e-16	1.11557540424489e-16	7.47863655630876e-17	1.0790629388588e-16	1.02160983614239e-16	5.90852836619154e-17	2.9040395665613e-17	1.04713209294602e-16	1.08587954035908e-16	1.04752861024036e-16
2008193	20	1.03439089621895e-16	1.07204204069989e-16	9.89234504049883e-17	1.20110192267425e-16	1.08611170663885e-16	1.08514847943075e-16	1.05998545489284e-16	1.08723320280284e-16	1.04291594298883e-16	1.06595555578467e-16	1.12096040315713e-16	6.78133226911198e-17	1.09192603450575e-16	9.9389413140348e-17	5.58225346306298e-17	2.83600573433327e-17	1.02215613481435e-16	1.07079997531082e-16	1.05381049502981e-16
2008193	21	1.07789073412358e-16	1.06263503429087e-16	6.95472251783655e-17	1.18736027490852e-16	1.08101159057674e-16	5.01800138623035e-17	1.06249232825228e-16	1.0085645010457e-16	1.07868026552148e-16	1.0699735143837e-16	1.11433001171679e-16	6.22972143083208e-17	1.04637905161191e-16	9.83388185150111e-17	5.30871129438154e-17	2.91626973997224e-17	1.01502146771807e-16	1.07154978101797e-16	7.88589201515232e-17
2008193	22	1.07969095262885e-16	1.0567274856434e-16	1.81793422944283e-17	1.18155363372548e-16	1.08209516501073e-16	1.2392170767232e-19	1.06619407536351e-16	9.1013581780523e-17	1.07693375434682e-16	1.06888583267871e-16	1.11158016950604e-16	7.62294964419984e-17	7.99654660525564e-17	9.24413902566066e-17	5.1773195222555e-17	2.88766009202629e-17	1.01618052133448e-16	1.0723598857797e-16	6.94629643773886e-17
2008193	23	1.02602298226543e-16	1.06829843900022e-16	1.02105232791314e-16	1.17136873313961e-16	1.08202898237677e-16	6.33811735211994e-17	9.68185350708298e-17	9.98533706457644e-17	1.07568847257284e-16	1.06834731197487e-16	1.10979865413472e-16	7.51853623297299e-17	6.56957018165737e-17	9.57557937009379e-17	4.92604385691227e-17	2.91642708978315e-17	9.92323417140016e-17	1.09752438516682e-16	6.49328664493727e-17
2008194	0	1.01112853502874e-16	1.07863202165349e-16	2.38489596064814e-17	1.14962173712564e-16	1.09049852291995e-16	1.1028703149336e-16	9.49469526080439e-17	1.06691490315964e-16	1.08468178527814e-16	1.06944015427779e-16	1.10516075775795e-16	7.38005285874243e-17	6.57301975092861e-17	9.77504528831461e-17	4.72966276342319e-17	2.86714200387579e-17	9.48735594945248e-17	1.05668364574412e-16	6.43858745301436e-17
2008194	1	1.0388591063237e-16	1.08375491044865e-16	1.74994525734632e-17	1.12706179488914e-16	1.1000983826984e-16	1.17840169582983e-16	1.06637941867578e-16	1.06484046771947e-16	1.09280395728958e-16	1.07188224781735e-16	1.10514416975839e-16	1.96565185309516e-17	7.51694536217468e-17	1.07132153623277e-16	4.73468099982651e-17	2.79646849722394e-17	9.28942673639359e-17	1.05029823281442e-16	7.05499092981516e-17
2008194	2	1.04121812415948e-16	1.08556102646384e-16	2.09257669283772e-17	1.10285290303338e-16	1.02171797439834e-16	1.18362760190576e-16	1.07704662487484e-16	1.02696108796652e-16	1.08578855653066e-16	1.07462133042525e-16	1.01394106089707e-16	5.81270013885749e-18	7.72433667461886e-17	1.06515027689825e-16	4.71637529711822e-17	2.74382415042455e-17	1.03405410762538e-16	1.09822588518791e-16	1.06884929201035e-16
2008194	3	1.08210948586167e-16	1.11316423134843e-16	2.74024536040758e-17	1.0819328256255e-16	1.02127900815442e-16	9.44600973000142e-17	1.07877222980009e-16	1.03685034203945e-16	1.05867883100175e-16	9.77696831201762e-17	9.9527082243985e-17	8.24728129559893e-19	8.25323195870189e-17	1.08851122827908e-16	4.8645986624748e-17	2.73067442341391e-17	7.99160123050286e-17	1.08415873959578e-16	1.06500517481361e-16
2008194	4	1.07056837852515e-16	9.73190048092614e-17	3.55187046954988e-17	1.08925213465991e-16	9.59480396426252e-17	7.70345706709593e-17	8.57846929392723e-17	1.04538681307001e-16	1.07497246565442e-16	1.07940111909345e-16	9.96598393152754e-17	9.36488996051384e-17	7.57663112514224e-17	1.09014626274111e-16	5.04162157038009e-17	2.7260626485951e-17	1.07004579070757e-16	1.07667784822302e-16	1.06655833376157e-16
2008194	5	1.08816666444675e-16	8.85112977895149e-17	4.39103759070779e-17	1.09147438051974e-16	9.87511707477009e-17	6.71822604958225e-17	7.79191381928716e-17	1.0254380247519e-16	1.09583039266375e-16	1.08078750954479e-16	9.86784339866405e-17	7.49012438720937e-17	6.34181509907515e-17	1.0754152691956e-16	5.14778409167056e-17	2.70139545255525e-17	9.19396317357907e-17	1.07534378086209e-16	1.06521527114791e-16
2008194	6	9.79982951893837e-17	1.07890585676568e-16	4.81135435106474e-17	1.09091769619747e-16	1.03707335946827e-16	6.41990213138604e-17	7.91340011691786e-17	1.02176711989421e-16	1.04632414079915e-16	1.08262451977517e-16	1.0715440068788e-16	5.83916734779519e-17	6.73881036905702e-17	1.08655728538186e-16	5.2454582663605e-17	2.70669172546625e-17	1.19139653277028e-16	1.08222164960862e-16	1.06622431110811e-16
2008194	7	9.75824148769781e-17	1.07224365229357e-16	5.08088452799765e-17	1.08993102063558e-16	1.06913198066067e-16	6.5861858238136e-17	1.07624898747709e-16	1.06258890179255e-16	1.01773969901293e-16	1.0817047204619e-16	1.07882890788396e-16	5.84935340008818e-17	7.33038048701708e-17	1.09699378833017e-16	4.98735273401068e-17	2.82864615854994e-17	1.18104093813124e-16	1.07573837152473e-16	9.64093635150321e-17
2008194	8	7.87719894951091e-17	9.99175954782866e-17	5.10245823666381e-17	9.9313564123811e-17	1.06846871664171e-16	1.10712500325322e-16	1.07764371375517e-16	1.0685004394553e-16	1.00340520163234e-16	1.0817082820916e-16	1.12177499883707e-16	1.15954079708911e-16	6.46594211875038e-17	1.10750835713525e-16	4.58818617836618e-17	5.52124269227975e-17	1.17700827850709e-16	1.03748937534478e-16	1.01271497225877e-16
2008194	9	9.95979639299951e-17	1.01290840436917e-16	5.21270063783659e-17	9.26188828344133e-17	9.97426417785941e-17	1.10729020795266e-16	9.5408085132571e-17	1.07395981121347e-16	9.90834001799383e-17	1.0316359916032e-16	1.12798907493563e-16	1.05283033384061e-16	6.74029690614178e-17	1.12366232311735e-16	4.06117199965314e-17	1.19203873792596e-16	1.16560729021123e-16	1.01047409201904e-16	1.06760189549418e-16
2008194	10	9.97759000068633e-17	9.1569514283341e-17	5.73673505765642e-17	8.92314451201152e-17	9.47013018472647e-17	1.10527452734923e-16	9.33755258490806e-17	1.00062248959557e-16	9.57711256861813e-17	7.32859536284677e-17	1.13589034690262e-16	1.14671157191829e-16	7.61063862901783e-17	1.13076350911222e-16	3.8212905095947e-17	1.04784838000399e-16	1.14568500130181e-16	9.86432913982074e-17	1.06475834494559e-16
2008194	11	9.21466198348948e-17	9.11243536505155e-17	6.1334687404809e-17	8.21218352681005e-17	9.08760979976275e-17	9.32951180185321e-17	8.08935756232741e-17	9.96174806339663e-17	9.11651040171799e-17	5.94350293046302e-17	1.14849383926239e-16	1.15389149303209e-16	8.73914053137617e-17	1.04888275809529e-16	3.86275602593106e-17	8.5335188609799e-17	1.10680188820899e-16	9.5690083706287e-17	1.06030725692473e-16
2008194	12	1.08887440786263e-16	8.83911718475948e-17	6.19117265236544e-17	7.79449184934855e-17	8.64016417364671e-17	8.09728509461534e-17	5.79240434322189e-17	1.05659855017607e-16	8.58760692143949e-17	6.57105529012364e-17	1.15249298726499e-16	1.11191710848568e-16	1.05384202754726e-16	8.48123929158306e-17	3.85714818343603e-17	7.01269911210475e-17	1.0799083854247e-16	9.12404972958286e-17	1.05771344761996e-16
2008194	13	1.09739245299413e-16	8.34026783392121e-17	6.09719217608005e-17	8.06490484045064e-17	8.62238017844131e-17	7.49855190079177e-17	4.75074213214715e-17	1.05963170109021e-16	8.68632938529266e-17	6.0625395168344e-17	1.14496745050288e-16	1.1037192899515e-16	1.11339259812527e-16	6.70245876116369e-17	3.79242413125549e-17	6.49093431778313e-17	1.07646499620327e-16	8.70439866718171e-17	1.05475669574467e-16
2008194	14	1.09960382485709e-16	8.6922326583284e-17	5.932619249575e-17	9.62980847077015e-17	9.56770987757352e-17	6.98874445906785e-17	5.37041418968298e-17	9.73091796538981e-17	9.92566695489132e-17	9.35928584865895e-17	1.14018024752833e-16	1.06983031692898e-16	1.11010714805203e-16	7.25761092651165e-17	3.69092332070317e-17	6.38176344108269e-17	1.08109542912305e-16	8.47395151959049e-17	1.02049761889784e-16
2008194	15	1.09957087625633e-16	1.02048601745834e-16	5.62247504955139e-17	9.45993601558991e-17	9.52302842902071e-17	6.58595313305e-17	1.01694877792372e-16	1.07025014943572e-16	8.94293581852343e-17	1.07554010738287e-16	1.13493527137216e-16	1.10080866705203e-16	1.10881376828307e-16	7.65987777398484e-17	4.41788818269123e-17	6.01411120671045e-17	1.09607832420677e-16	9.08679558026078e-17	9.23745126487435e-17
2008194	16	1.14008411415153e-16	8.9671931869037e-17	5.27093121536837e-17	7.95387471707109e-17	8.90355399392407e-17	6.19247446455635e-17	1.07059557654184e-16	1.06981139538902e-16	9.12830053016105e-17	1.07632299704456e-16	1.13337464506847e-16	1.12611913251439e-16	1.11399831408092e-16	8.71929731776367e-17	5.77904940172604e-17	5.55300142122639e-17	1.01184357047057e-16	1.04486786900219e-16	8.97825451232705e-17
2008194	17	1.1487977241907e-16	8.84667845791889e-17	5.00102874434093e-17	7.06427266094962e-17	9.47957205226758e-17	5.89286377375655e-17	1.07215760474829e-16	1.0917200500387e-16	1.04204046332627e-16	6.76514068254236e-17	1.13394765561168e-16	1.10732156690986e-16	1.098828093745e-16	9.07538404622882e-17	4.89185702502656e-17	5.17210158181365e-17	9.52495368275884e-17	9.64004188781808e-17	1.04740496784761e-16
2008194	18	1.15857048298713e-16	1.018381781455e-16	4.77544763166949e-17	6.81924191325437e-17	1.05978474384714e-16	5.58694738680636e-17	1.07145911400546e-16	1.07440549876593e-16	1.07017320194872e-16	5.35395135461475e-17	1.13330271005307e-16	1.10766659420465e-16	1.0703628371091e-16	9.12219426486278e-17	3.91369932415099e-17	4.84530220407955e-17	9.2657911500296e-17	9.51948377145964e-17	1.05160303549245e-16
2008194	19	1.15107042542887e-16	1.06531728781122e-16	4.5816964757764e-17	7.54285971273785e-17	1.06371098984252e-16	5.32298827114559e-17	1.06891756362494e-16	1.03728969274082e-16	1.09185242640801e-16	1.07341957739907e-16	1.10663169555404e-16	1.10547096263123e-16	1.08697416549418e-16	1.06172346317681e-16	3.44221091970554e-17	4.68513732538202e-17	9.01860504462208e-17	1.07017582569696e-16	1.05300476831868e-16
2008194	20	1.03241966621112e-16	1.06815237665534e-16	4.46804866778106e-17	8.16008292557589e-17	1.06465069484892e-16	5.12786564636453e-17	1.06650004138211e-16	1.04433607130318e-16	1.06956053794989e-16	5.90744413652695e-17	1.09433073854997e-16	1.10357419681801e-16	1.02913302787749e-16	1.1073819039734e-16	3.35092808659335e-17	4.75416332110073e-17	1.11250184655113e-16	1.07178115880836e-16	1.05355846240592e-16
2008194	21	8.55385302586132e-17	1.07532095336272e-16	4.60399130648145e-17	8.99442610241758e-17	1.06339208366722e-16	5.043433145709e-17	1.06485881018437e-16	1.04660953806308e-16	1.06355232529825e-16	5.07644250544521e-17	1.10081057799061e-16	1.10032737878512e-16	7.95168726525116e-17	1.15288385425924e-16	3.34161410458632e-17	5.29306732262972e-17	9.48959325413137e-17	1.07937439908609e-16	7.68013818363325e-17
2008194	22	6.89580096052573e-17	8.19996557109943e-17	4.93082020420636e-17	8.85379151551273e-17	1.03743210711521e-16	5.07382999465164e-17	1.06339808224833e-16	1.0897417893266e-16	1.06084254743309e-16	3.92172234299797e-17	1.14247648899851e-16	1.09542151015659e-16	7.42311312394798e-17	1.14512481965827e-16	3.3868011458099e-17	6.17923327219722e-17	8.12533387119758e-17	1.07958345312295e-16	6.25433118866645e-17
2008194	23	6.16247867659867e-17	7.73037140619319e-17	5.18736305702439e-17	8.39960916636574e-17	1.00128668164439e-16	5.27690910776539e-17	7.49203715873533e-17	1.08431667068621e-16	1.0702308907462e-16	2.99212071925627e-17	1.14525761588761e-16	1.10033481582353e-16	7.35901106640665e-17	1.15564307912594e-16	3.53223608174403e-17	6.82977331563491e-17	7.45037750285494e-17	1.07969326982567e-16	4.73948419614029e-17
2008195	0	6.81658827069432e-17	7.36841968601555e-17	5.58424602594108e-17	7.45702398535587e-17	9.74148236058575e-17	5.73844742905636e-17	5.72843124271566e-17	1.03970276656554e-16	1.07021951887105e-16	2.5757246054877e-17	1.1443182226639e-16	1.11046160911875e-16	9.08268280820338e-17	1.19191963164888e-16	3.78218360633341e-17	6.72959444233602e-17	6.9402582783183e-17	1.0847989576184e-16	3.5487313085145e-17
2008195	1	9.73478623960839e-17	7.26040289997927e-17	6.12107829230666e-17	7.0472010257082e-17	9.57332052014337e-17	6.04408390095437e-17	4.71514433879836e-17	9.97440087852084e-17	1.00339688715875e-16	2.7404640597793e-17	1.1569951652265e-16	1.1238171304847e-16	1.01117298619467e-16	1.02465494627078e-16	4.13072817847239e-17	3.29729725504283e-17	1.20739905945033e-16	1.06467933492268e-16	2.70383243762801e-17
2008195	2	1.01651464865128e-16	7.6283306524672e-17	6.52975043359773e-17	6.76752137264918e-17	9.43792776855149e-17	6.22473351825662e-17	4.42593252731814e-17	1.06835758287074e-16	8.79048555323287e-17	3.18137647430438e-17	1.1719821083524e-16	1.13355158976086e-16	1.05386781457384e-16	9.20312007573626e-17	4.6672120784372e-17	1.68066672118009e-17	9.17659084163663e-17	9.45683942080324e-17	2.12543460977805e-17
2008195	3	7.06074772670647e-17	7.26241717743374e-17	6.58470301201783e-17	6.54030616984528e-17	9.22065500283067e-17	6.19089922550772e-17	4.4439003829433e-17	1.0733472617185e-16	7.50659607584417e-17	3.96353886435164e-17	1.17668585204647e-16	1.13885944969183e-16	1.0576090931129e-16	8.63726277331549e-17	4.86398945546055e-17	2.18560609799888e-17	1.11670341741009e-16	7.46634810512451e-17	2.21265538360706e-17
2008195	4	5.67827855343773e-17	7.23855541683844e-17	6.46426911212491e-17	6.45491749653545e-17	8.84346465138019e-17	6.0422596752951e-17	5.1010539764831e-17	1.07552879244788e-16	6.52634547174714e-17	5.57188608109316e-17	1.17311112186555e-16	1.1409381314327e-16	1.05995956680468e-16	8.31690153760124e-17	4.93112320802189e-17	2.81318631503104e-17	1.08476352893856e-16	5.99801694786288e-17	3.0655149524401e-17
2008195	5	5.76759197675911e-17	7.86080485342296e-17	5.97227587503507e-17	6.94016780726653e-17	8.41091993676192e-17	6.25901815147215e-17	8.32000076158727e-17	1.07513439216136e-16	6.07418692501137e-17	6.73085467392954e-17	1.16436376890763e-16	1.12275559623524e-16	1.05768280760907e-16	7.11333911672063e-17	4.70826246442212e-17	3.44941703405212e-17	1.09311136639116e-16	5.21529447195685e-17	4.16540491026985e-17
2008195	6	6.44531266508752e-17	1.1588055958797e-16	1.20469498131826e-16	7.54720352758202e-17	8.11570317263379e-17	6.93616392043079e-17	1.06805356627604e-16	1.07339226387494e-16	7.90407734936972e-17	7.43396220494813e-17	1.13119558935955e-16	1.10885094126374e-16	1.0229051424525e-16	5.48181392691627e-17	4.37760043795143e-17	3.88640082478567e-17	1.09516735301592e-16	5.11800870239694e-17	4.90870072333242e-17
2008195	7	7.69895871237035e-17	1.17865247008351e-16	1.16943945279535e-16	7.8296629116162e-17	8.42269542593317e-17	1.18744277489295e-16	1.05644664992346e-16	1.07367391835641e-16	9.76708629864429e-17	1.06698154608123e-16	1.07884872340643e-16	1.11006064013098e-16	1.00852471404017e-16	4.43090197887028e-17	3.97216156802322e-17	1.11282225925762e-16	9.44201006590881e-17	6.93558976950702e-17	1.16456536888747e-16
2008195	8	7.71294563504234e-17	1.07332486397628e-16	1.13827758784466e-16	7.71460106367669e-17	8.6284158089227e-17	1.19642236965106e-16	1.05581438181379e-16	1.07393371316286e-16	1.02402744615207e-16	1.06368858879764e-16	1.10319400865113e-16	1.11220518636855e-16	1.0162901416219e-16	4.49117443876553e-17	3.72927151093747e-17	6.28185681372847e-17	8.2418728782749e-17	9.19378727235887e-17	1.08661758237301e-16
2008195	9	8.2399178386287e-17	1.20221270657723e-16	1.15989331759195e-16	7.75880102392623e-17	8.72088643668031e-17	1.19846736744964e-16	8.83635247576666e-17	1.00641274663505e-16	9.78051757861198e-17	6.32974185853249e-17	1.10867321112779e-16	1.09847586119852e-16	1.03154829760291e-16	4.94671113336267e-17	3.58689420221158e-17	1.70928441221805e-17	7.63549220577691e-17	1.00406152536342e-16	9.69299367892737e-17
2008195	10	8.09927401115608e-17	1.00364933998856e-16	1.22225456084278e-16	7.74867826188625e-17	9.01644621707476e-17	1.09093447935703e-16	6.02573540107761e-17	9.04571084674475e-17	9.5151192662698e-17	5.44892844136011e-17	1.11562975450524e-16	1.08976973974061e-16	1.05474761223223e-16	5.00554261351503e-17	3.4980973005907e-17	1.31631827508349e-18	7.55237933946701e-17	9.83077040359763e-17	7.94749320305427e-17
2008195	11	6.55328293225816e-17	9.6822021419871e-17	9.75564912922036e-17	7.55551266903158e-17	8.86757385082779e-17	9.23327112933646e-17	4.97202980254545e-17	8.05004946005836e-17	8.95725304523612e-17	5.56590000862175e-17	1.06865956283841e-16	1.09027093291178e-16	1.05507335392706e-16	1.09456930501258e-16	3.45087442440542e-17	1.48410521593609e-18	1.10675228249336e-16	9.51304890247646e-17	6.23800895100048e-17
2008195	12	5.49465972236589e-17	8.44998471032646e-17	9.37392313899328e-17	7.28172608523362e-17	8.26251960091059e-17	1.01639791047029e-16	4.80128353997068e-17	7.17325649681581e-17	8.20465970840524e-17	5.94297317462952e-17	1.10320003188343e-16	1.09181060276234e-16	1.09290326634223e-16	1.09950780388932e-16	3.33618518239007e-17	3.43978900077969e-18	9.86810004089019e-17	1.0374501882699e-16	5.14618528885874e-17
2008195	13	4.98905033660017e-17	7.96133345693612e-17	9.0362097029401e-17	7.28704427832776e-17	7.63214432842539e-17	1.10159042438018e-16	4.90005332472966e-17	6.41562719046156e-17	7.34175035891556e-17	6.79732533247861e-17	1.08299275415926e-16	1.09260399397384e-16	1.09938701146249e-16	1.10478837866651e-16	3.23319950698307e-17	8.399717935972e-18	8.84702964029915e-17	9.35409751736477e-17	4.52906529394095e-17
2008195	14	7.86798127715941e-17	7.52277180737229e-17	1.00919595549874e-16	7.89523963521597e-17	7.1296575435752e-17	1.10967493912333e-16	5.17805951526657e-17	5.77892487382658e-17	6.64453193687046e-17	1.05802826266482e-16	1.08601858961987e-16	1.09386375535731e-16	1.11218659238739e-16	1.10843132100965e-16	3.29784725011496e-17	1.62721926556457e-17	8.1322395810241e-17	7.50895370573252e-17	3.87726646824979e-17
2008195	15	8.53989103524284e-17	6.74872797635434e-17	1.05502854894308e-16	1.19811754336515e-16	6.69265584430662e-17	1.08728815922139e-16	5.75884689103258e-17	5.36026923105273e-17	6.12875909147823e-17	9.65858147874488e-17	1.09973945278298e-16	1.09464518172228e-16	1.12101043274321e-16	1.11427780173129e-16	3.65426495898589e-17	2.47081287375802e-17	7.92243777298443e-17	6.21919742625396e-17	3.41537561624638e-17
2008195	16	7.90394849754537e-17	6.08866070475018e-17	1.07124518616797e-16	1.00733261783852e-16	6.35954430161471e-17	1.03317503155533e-16	5.97523570588148e-17	5.11633210405132e-17	5.73450700798785e-17	9.50274126944344e-17	9.02722030811372e-17	1.09892619385542e-16	1.16281732050393e-16	1.10954302376292e-16	4.20178926551918e-17	3.30878935208879e-17	7.68083996213381e-17	5.53476783506334e-17	3.08744926911272e-17
2008195	17	8.31610622832871e-17	5.52705026082654e-17	1.10365561578008e-16	8.70913364178386e-17	6.02618333444481e-17	1.07601040413174e-16	5.97972712029909e-17	4.94750221280496e-17	5.39726996284133e-17	9.52770327658686e-17	7.87360048301543e-17	1.10202551949284e-16	1.20838673673971e-16	1.11291529126056e-16	4.62610622820555e-17	4.03154470642831e-17	7.39155688828756e-17	5.22414104717725e-17	2.74275616345317e-17
2008195	18	1.03959886291312e-16	5.12850385043399e-17	1.11202133612652e-16	8.75094367845357e-17	5.61094949674754e-17	1.13256719598536e-16	6.19908335283649e-17	4.65978769988348e-17	5.20953665617611e-17	1.04740271232361e-16	7.25923456748406e-17	1.11338890107845e-16	1.21069015780697e-16	1.10917145629683e-16	5.09136196946571e-17	7.87003285167366e-17	7.09813461700213e-17	5.07069318934815e-17	2.44648114191904e-17
2008195	19	1.10581589759499e-16	4.71681663301491e-17	1.10373097993112e-16	8.71748793252862e-17	5.20906343109991e-17	1.10418099042344e-16	6.50861894005895e-17	4.86043127234474e-17	5.15147290457398e-17	1.09329872485982e-16	6.79064639773866e-17	1.12335083292861e-16	1.17863507414705e-16	1.10306215893325e-16	5.60082019209622e-17	1.55384656652138e-17	6.88904981011212e-17	5.04486660298377e-17	2.21199818753127e-17
2008195	20	1.10982850217977e-16	4.50377432642864e-17	1.12364673435458e-16	7.32049202777402e-17	4.88538531618124e-17	1.17663695996539e-16	1.08769347984787e-16	5.5706870800512e-17	5.10170601822313e-17	1.09497782034553e-16	6.4007605896936e-17	1.12111245255957e-16	1.05966024244049e-16	1.14991644515193e-16	6.00490973900189e-17	1.19667937377328e-19	6.77245174758247e-17	5.13888415277421e-17	2.15584789574963e-17
2008195	21	1.10749247960752e-16	4.43862196788228e-17	6.18258329085378e-17	6.36679746774351e-17	4.61669461810871e-17	1.21500030514461e-16	1.09838588545128e-16	5.1043300105832e-17	5.07633898557351e-17	1.07870785666431e-16	6.0911563317914e-17	1.12208543965083e-16	1.00300368912762e-16	1.18608323058709e-16	6.02987876968131e-17	2.33922242535801e-17	6.67946994918912e-17	5.32613557645878e-17	2.32991217782929e-17
2008195	22	1.10608134584625e-16	4.34652786598971e-17	5.84180451476921e-17	5.92101209299796e-17	4.41724702173793e-17	1.21939602711322e-16	1.09803287772086e-16	9.58846433355236e-17	7.30857389177907e-17	6.92795710147979e-17	5.90633246484364e-17	1.13348129754037e-16	9.50738555597912e-17	1.18742348394661e-16	5.82017312007997e-17	9.46427982132744e-17	6.53469414692591e-17	6.09804203663823e-17	2.35816653879932e-17
2008195	23	1.10520128080028e-16	4.28633353121418e-17	6.32958342596324e-17	5.64688890643077e-17	4.50412000608655e-17	7.71954683608842e-17	1.1000937732259e-16	9.37686986293854e-17	1.07735301721042e-16	6.32893522410681e-17	1.11342483775571e-16	1.13253748915649e-16	9.01161698752578e-17	1.18567718775547e-16	5.59443146603987e-17	1.65249167649028e-17	1.17001163447712e-16	1.07438074000655e-16	2.21642139019625e-17
2008196	0	1.10390104525437e-16	4.29716088072424e-17	6.49372026658839e-17	5.32473269985751e-17	1.14087950113133e-16	6.16390480459218e-17	6.07935559658793e-17	1.04742148779577e-16	1.04115864535884e-16	6.10501007781388e-17	1.12498893236864e-16	1.1437834713487e-16	8.52495371031854e-17	1.18317566651361e-16	5.54988538299306e-17	1.04880905008644e-16	9.80886944544333e-17	1.08172403531466e-16	2.03656160474783e-17
2008196	1	1.1020644655891e-16	4.2949982497288e-17	6.15557928536147e-17	5.01988172664738e-17	8.18858687577833e-17	5.49724536338593e-17	5.54512312576802e-17	1.09130829683274e-16	1.02201480617439e-16	6.0721729636565e-17	1.13707953229112e-16	1.14755740878452e-16	7.79564900536619e-17	1.18038647955991e-16	5.60839035697335e-17	1.06161410767406e-16	8.46557830513217e-17	1.09302323006578e-16	1.8929608294101e-17
2008196	2	1.10211993998968e-16	4.18735848294621e-17	5.58548899948702e-17	4.79307701248576e-17	7.60657051236391e-17	5.15063535717825e-17	5.38150741971541e-17	1.09495056321141e-16	1.09267263352817e-16	6.1945847934913e-17	1.14985822453615e-16	1.14635550301579e-16	7.08927982463685e-17	1.19346410536917e-16	5.53751497382385e-17	3.28116413557663e-17	7.44143700363772e-17	1.06501005833955e-16	1.83298026204591e-17
2008196	3	1.10138175170732e-16	4.1166323026604e-17	4.87653339302758e-17	4.62269649580821e-17	9.9349142564489e-17	4.91824889375356e-17	5.43469124508977e-17	1.10606023757523e-16	1.09476669616498e-16	6.37836810100371e-17	1.15828306359117e-16	1.16354028175374e-16	6.84346468853333e-17	9.0129478812237e-17	5.32457888841832e-17	1.70781305043838e-17	6.7338399827762e-17	1.09052199398227e-16	1.89316567983515e-17
2008196	4	1.10425245327913e-16	4.08129877443859e-17	3.89436381388229e-17	4.4759079308962e-17	1.08652411117159e-16	4.73993300654223e-17	5.55411370738392e-17	1.1184916929184e-16	1.10054719615091e-16	6.71875753280246e-17	1.15628355922989e-16	5.33075686530173e-17	6.63087680129603e-17	8.1797635798361e-17	5.29149070513747e-17	1.74786057906168e-17	6.17907894636085e-17	1.08088527667237e-16	2.01183565249868e-17
2008196	5	1.10846254834562e-16	4.24986960232767e-17	3.39409591707465e-17	4.3198455664457e-17	1.08901386572766e-16	4.77274837498959e-17	6.36078753228926e-17	1.11735945878276e-16	7.22889763847953e-17	7.51026196531281e-17	1.10382759421102e-16	3.7181607955414e-17	6.93889507214191e-17	1.22451192309991e-16	6.19955608092839e-17	2.30887951223069e-17	5.78974685365508e-17	9.0420195567238e-17	2.82389621494743e-17
2008196	6	1.10915948455796e-16	5.03598386517145e-17	4.02626393867964e-17	4.48008453475105e-17	1.09310076645596e-16	4.68945002607489e-17	6.41607564057336e-17	1.12680224932138e-16	6.35734144674732e-17	8.82489726493861e-17	1.05966767022797e-16	3.55672837364146e-17	7.27199490460495e-17	1.22430957618375e-16	6.28728087808401e-17	2.96489125680468e-17	5.50948180024452e-17	7.23051225123351e-17	3.29772521393183e-17
2008196	7	1.14176773381507e-16	5.52883588381479e-17	4.25233744324225e-17	1.23206012144382e-16	1.09498601342567e-16	4.49202496835914e-17	6.73517888338869e-17	1.14787754674816e-16	6.3722736863711e-17	1.11799282063433e-16	1.00283769417477e-16	3.68472470261629e-17	6.88582169016659e-17	1.22619283274238e-16	5.49836679631612e-17	3.39274821339432e-17	6.2944364726251e-17	7.35119833642935e-17	5.12914053585895e-17
2008196	8	1.16937704691209e-16	1.23451905341897e-16	4.46860721093396e-17	1.22165229216779e-16	1.08701868911568e-16	6.20329383149209e-17	1.06868745154307e-16	1.13679268157942e-16	6.6923815975941e-17	1.10827821939091e-16	9.39861396339884e-17	3.84057674669638e-17	5.98005670500369e-17	1.22573079897055e-16	5.24853945099899e-17	3.98026444783274e-17	7.89384275957617e-17	7.71989968363069e-17	1.21383609024362e-16
2008196	9	1.16507550071518e-16	1.23354499305234e-16	4.72655714767978e-17	1.18289591384788e-16	1.02229995391271e-16	7.15112820255932e-17	9.67034515891343e-17	1.09230515595979e-16	7.37536058485075e-17	9.9789277729858e-17	8.68760538663184e-17	3.72938005446923e-17	4.8217909484335e-17	1.23121704926868e-16	6.26446733525691e-17	4.15781903473832e-17	9.19939050596761e-17	8.58508531293793e-17	1.08235965554786e-16
2008196	10	1.11642634208749e-16	1.10283755435569e-16	4.57896109937371e-17	1.0229739632836e-16	9.9847389408434e-17	7.14194209971198e-17	8.91157301381612e-17	1.08132794080949e-16	8.19632447285565e-17	9.40405105039461e-17	7.98387014610563e-17	1.11439182529624e-16	3.71717158684182e-17	1.23521411048593e-16	7.53738814454036e-17	4.79213431540622e-17	9.9005928733807e-17	1.04076660706208e-16	9.78455096035505e-17
2008196	11	1.11251213499221e-16	9.75652498327126e-17	7.83573868734268e-17	9.27761455010692e-17	9.90544740735236e-17	6.90422242342444e-17	8.28282456554863e-17	1.01168562695018e-16	8.70756973897335e-17	8.32058264436582e-17	7.34798627903585e-17	9.44049829279631e-17	2.98324889853825e-17	1.22820495732689e-16	6.86753106402569e-17	6.06477728991682e-17	1.02132909261151e-16	9.28919805232472e-17	8.99332965934293e-17
2008196	12	1.11420805180093e-16	8.73988945950641e-17	5.5951486865982e-17	8.63499335404544e-17	9.69536372418043e-17	6.66342398010833e-17	7.67742242667373e-17	9.32708130361722e-17	8.68943849140824e-17	7.05776648791117e-17	1.16801569578964e-16	8.20430693774284e-17	2.43394540267334e-17	8.94170323013418e-17	6.34207178799867e-17	6.75380822018909e-17	1.01310885954094e-16	8.76015225444284e-17	8.3731761124422e-17
2008196	13	8.86166444211941e-17	7.90238633735872e-17	4.71848419042369e-17	7.99208782715365e-17	9.53510216510824e-17	6.48014822964496e-17	6.91656459485225e-17	8.81646057584454e-17	8.42383769586388e-17	5.94079464791611e-17	1.17135336453092e-16	7.54231302903266e-17	1.98290397174513e-17	7.72438909792453e-17	5.91896443353076e-17	7.23883811559144e-17	9.97566398281086e-17	8.11775236019089e-17	7.4098225260991e-17
2008196	14	7.22580248645415e-17	7.38053344483637e-17	4.11949342479409e-17	7.41549888577023e-17	9.13771981507443e-17	6.41220521173209e-17	6.07637363303287e-17	8.49590612169594e-17	7.85180246090035e-17	4.90053286485024e-17	1.17781264962085e-16	7.37424011658724e-17	1.80609620306523e-17	1.21251767136347e-16	5.57693591059599e-17	1.11322968593961e-16	1.02279435330127e-16	7.31955992015848e-17	6.36446745358102e-17
2008196	15	5.80808368969517e-17	6.641981527956e-17	3.87586650578609e-17	6.84281640356971e-17	8.56664501775687e-17	6.38746113654138e-17	5.20001521783309e-17	8.4131626370024e-17	7.12576059968775e-17	3.96749789208573e-17	1.18014217097335e-16	7.15685240664822e-17	1.91087494221862e-17	1.21390579747196e-16	5.43745739194964e-17	6.66163641439338e-17	1.08957472169159e-16	6.50415403131556e-17	5.44976974280453e-17
2008196	16	4.48363678300165e-17	5.91024306319866e-17	3.83823363281154e-17	6.30568577206756e-17	8.12243105267871e-17	6.32344287289963e-17	4.30485322635141e-17	8.12349808736921e-17	6.30287726955719e-17	3.33469180648934e-17	1.17938009483962e-16	6.70699138456596e-17	1.13353156019136e-16	1.21627634164859e-16	5.40901291160471e-17	4.54638175345085e-17	1.09050504427327e-16	5.72459882934532e-17	4.67299109969434e-17
2008196	17	3.28282391114668e-17	5.28203772349029e-17	3.6689044145056e-17	6.06695489908117e-17	7.81062641321165e-17	6.14256692127726e-17	3.60638184181601e-17	7.32136209225471e-17	5.54527124357574e-17	3.0946867660224e-17	1.1797312200918e-16	6.35842546739963e-17	1.1095869747551e-16	1.21601566862396e-16	8.43591549085688e-17	1.18426923639551e-16	1.08429462018554e-16	5.05057634976355e-17	4.11411870085855e-17
2008196	18	2.74498830787547e-17	4.72469567085578e-17	3.43433767456342e-17	5.81714919770994e-17	7.55397968081805e-17	5.71713831611934e-17	3.21292925387732e-17	6.35721004954074e-17	4.86676241863736e-17	3.5598680704945e-17	1.18107808226625e-16	6.07011571066015e-17	1.10246963985807e-16	1.20749524000771e-16	7.65179742975399e-17	8.49157745195823e-17	9.10009789358942e-17	4.41971121350476e-17	3.47993565617232e-17
2008196	19	4.23394995404224e-17	4.25831825099474e-17	3.29221670371831e-17	5.50791092161609e-17	7.22015866538774e-17	5.26938776486145e-17	3.19646520627013e-17	5.40487119531696e-17	4.25912841559901e-17	5.22348438577897e-17	1.18279743281718e-16	5.56519340670929e-17	1.10296856531356e-16	1.20907997254872e-16	1.00955555812838e-16	6.43758697041109e-17	8.0203033388487e-17	4.1039193261799e-17	2.96998602230741e-17
2008196	20	1.10581683983869e-16	3.90461730691631e-17	3.27201991299547e-17	5.11120647323185e-17	6.66879198703148e-17	4.92716367353494e-17	4.14053492142361e-17	4.51203945530593e-17	3.84573004399059e-17	1.07006897774776e-16	1.16937988754693e-16	5.49374882267954e-17	1.10369254374257e-16	1.1153532954057e-16	5.98420741842699e-17	5.85291267993578e-17	1.08307980601096e-16	6.13907252702537e-17	2.55878857010071e-17
2008196	21	1.09987049243126e-16	3.7642460739956e-17	3.30732917588543e-17	4.79283541370346e-17	5.9523613260243e-17	4.66102297615493e-17	1.06660009014204e-16	3.75240966641741e-17	4.41792091082222e-17	1.07161615777623e-16	1.15329350387009e-16	5.98268069250497e-17	6.20242809926494e-17	8.85687440982568e-17	4.38074847837553e-17	1.12384916611147e-16	1.09235002070516e-16	1.07098385967172e-16	2.30468303777386e-17
2008196	22	1.09684125190007e-16	3.9596719418571e-17	3.32732023491864e-17	4.63840546841063e-17	5.24596862562465e-17	4.48099577145624e-17	1.06362307423526e-16	3.8542524499311e-17	1.07014755076373e-16	1.07008204167061e-16	1.14477099973262e-16	6.01311290021621e-17	5.04424177631645e-17	8.04373193779513e-17	4.35542955375155e-17	1.11727324476108e-16	1.08679275008262e-16	1.07041697944361e-16	2.1938117942895e-17
2008196	23	8.57354422036577e-17	3.97601756956167e-17	3.29053012414628e-17	4.53220057452189e-17	4.58634306595255e-17	4.29000582710513e-17	1.06434207413553e-16	1.06417621161466e-16	1.071303958679e-16	7.8694675465447e-17	1.16807265158222e-16	6.16061801394005e-17	4.61054354056084e-17	7.03324613275157e-17	4.71058685020248e-17	1.11883805860134e-16	1.08322813003826e-16	1.06663309728418e-16	2.13916213075352e-17
2008197	0	5.28794672161505e-17	3.74356803252762e-17	3.21662570217973e-17	4.48560101684763e-17	4.49080243245086e-17	4.10197610356833e-17	7.81704294180123e-17	1.06514712442789e-16	1.07210214757128e-16	5.97443826726585e-17	1.18033533064542e-16	4.98335327952292e-17	3.93752987353954e-17	5.75370454622897e-17	5.13469839247894e-17	1.12371779489217e-16	1.08792332802136e-16	1.0646169688041e-16	2.12275682198011e-17
2008197	1	2.92154336559707e-17	3.24269453190559e-17	3.1628948590763e-17	4.49411182701748e-17	7.68804237378582e-17	3.94551691244338e-17	6.64008112190979e-17	1.0709601847389e-16	1.02482046158415e-16	3.68341120714686e-17	1.19337487826539e-16	6.26050522855043e-17	3.14027581410131e-17	5.22971670542515e-17	5.58693375469518e-17	1.14065099002218e-16	1.09159867989223e-16	9.23369817878605e-17	2.16358375946296e-17
2008197	2	1.50278432444625e-17	3.18113490276602e-17	3.12781937351152e-17	4.31627083143081e-17	1.06659916530455e-16	3.73108082339065e-17	4.62860823223922e-17	1.07009627477093e-16	8.16295373413295e-17	2.05251739694998e-17	1.16758495845597e-16	6.86673391597548e-17	2.36373762636659e-17	4.85481590262833e-17	5.87181284025243e-17	7.91832259063516e-17	1.10000433689701e-16	6.89385175187695e-17	2.27517339410957e-17
2008197	3	7.23560116598474e-18	4.08199905194984e-17	3.13082941307252e-17	4.29079045117852e-17	1.06369094571801e-16	3.46967340306059e-17	2.91206821848264e-17	1.06916761470337e-16	6.02719992502198e-17	1.07302538403414e-17	1.12758298505693e-16	6.96895614804428e-17	1.70021715784428e-17	4.5557702279921e-17	5.83412504118106e-17	5.59307662976919e-17	1.10710251860044e-16	4.90449928445899e-17	2.46310105281127e-17
2008197	4	3.36601594185584e-18	1.05978930275762e-16	3.2014009814263e-17	5.76313739192189e-17	1.06822478910057e-16	3.35735673378943e-17	1.77536564160259e-17	7.68618208194858e-17	4.17286422478912e-17	5.18860556533815e-18	1.12329738194471e-16	6.8137339213352e-17	1.15806310428316e-17	4.30127581881041e-17	6.15917923810933e-17	5.08618458897176e-17	7.77741100474329e-17	3.3781608720068e-17	2.70722287934974e-17
2008197	5	1.6267452233314e-18	1.05139981740225e-16	3.30139126081627e-17	1.05679732135629e-16	1.07756458151779e-16	3.32991055514294e-17	1.01069398767501e-17	5.13644296995376e-17	2.85068974623215e-17	2.34983577549234e-18	1.12539015177206e-16	6.57980111991038e-17	7.37721324187474e-18	4.0971176349535e-17	6.33147685807284e-17	4.89926923838758e-17	8.22290619831789e-17	2.26311878868018e-17	2.98440493383371e-17
2008197	6	9.87164263903933e-19	1.0522638691262e-16	3.3876730242128e-17	1.05224607057928e-16	1.07805506077025e-16	3.15713525922367e-17	5.32482388207332e-18	3.31932027305634e-17	1.93308500769101e-17	1.04621305696298e-18	1.14538852741448e-16	6.98591948656688e-17	5.06205835384861e-18	3.92816414687935e-17	6.99495790430626e-17	1.21409747421504e-16	1.1054101532236e-16	1.45835480327517e-17	3.34476909633229e-17
2008197	7	1.03285317999207e-18	4.81214524086973e-17	3.737684773192e-17	1.05375102422452e-16	8.25699895963102e-17	3.00670012527148e-17	2.58033961985453e-18	1.94444782261605e-17	1.26248218050408e-17	5.73450616848753e-19	1.13457909699949e-16	1.21760013359136e-16	8.03507942493407e-18	3.84959911765815e-17	7.35615710527853e-17	1.19958556884191e-16	1.11022266651181e-16	9.05241635116962e-18	1.1576306227985e-16
2008197	8	1.58714920995127e-18	2.92095664619565e-17	3.83733713895233e-17	8.81037394933629e-17	5.6495055337008e-17	3.22095512456388e-17	1.29560099922638e-18	1.05919913051474e-17	7.89651065356821e-18	6.19741030498148e-19	1.12490407494505e-16	1.21242028809828e-16	1.39970075482077e-17	4.03621038155698e-17	7.39231426492007e-17	6.21999669010766e-17	1.09177253400129e-16	5.60424715053393e-18	1.10138776290594e-16
2008197	9	2.56895372441565e-18	1.78844701389296e-17	4.10967179687207e-17	7.42979776909238e-17	3.68289832854175e-17	3.34933431424448e-17	1.13746263405473e-18	5.52584121991454e-18	4.85006927748361e-18	7.80145571777998e-19	1.12100529275206e-16	1.16526108720956e-16	2.77998695742942e-17	4.00996240972326e-17	7.34585568981167e-17	3.80335182046141e-17	1.07943848104318e-16	3.74599450816456e-18	1.07250426324095e-16
2008197	10	4.05208887868124e-18	1.1240980624972e-17	4.49723061953029e-17	5.67579461784212e-17	2.28642993713603e-17	3.53682922303096e-17	1.2136255443458e-18	2.73884476590038e-18	3.05837995129168e-18	1.13798663072956e-18	1.12228370074539e-16	1.16043717298174e-16	5.21932931672934e-17	4.26379900469668e-17	7.28032958077934e-17	3.25236656194671e-17	1.06269931833606e-16	2.93754671113886e-18	1.06723669000376e-16
2008197	11	6.73793320502168e-18	7.8268782386618e-18	4.67636880788761e-17	4.0593177555894e-17	1.33584416482333e-17	3.46207258911528e-17	1.59771789973277e-18	1.55783102252805e-18	2.51395297985278e-18	2.05100482995454e-18	1.10898115635815e-16	1.10615766968844e-16	7.63095776955704e-17	3.65147813754889e-17	7.31311060119446e-17	2.95574958162107e-17	1.07511712481182e-16	3.28187740038661e-18	8.07887212194589e-17
2008197	12	1.02967415632439e-17	6.38697653750805e-18	4.49677790061072e-17	2.61952861286443e-17	7.33934353845691e-18	3.02373804150216e-17	2.12960836974326e-18	1.57417748508951e-18	3.61184060421236e-18	3.05480226837452e-18	1.0989493877075e-16	9.63707189723858e-17	1.06151650726291e-16	2.71674574004827e-17	7.21344879121717e-17	1.12834391070615e-16	1.04083409430924e-16	5.98933785775497e-18	6.03802180058308e-17
2008197	13	1.4301817150308e-17	5.67454845159911e-18	4.21444901707656e-17	1.57756442744794e-17	3.89028795258917e-18	2.4485595205219e-17	3.36959680040172e-18	2.52618123916375e-18	6.2322580012004e-18	1.15537836520069e-16	1.09260561984559e-16	8.51868359598152e-17	1.05467684331365e-16	2.16777812456179e-17	7.01243002197041e-17	1.10069392803796e-16	8.04496432372147e-17	1.08252359956174e-17	1.1606459387852e-16
2008197	14	1.84243140243218e-17	5.17607987072055e-18	3.95742676194255e-17	9.37273124893948e-18	2.36199894679768e-18	1.884313908958e-17	1.08154858348478e-16	4.39879216256571e-18	8.83636622637912e-18	1.14379602613118e-16	1.09403451170305e-16	8.31587772478366e-17	1.06039693237417e-16	1.03704092763994e-16	1.07620403383261e-16	1.08479500952742e-16	6.12790725828079e-17	5.58475512309421e-17	1.12715225722217e-16
2008197	15	2.78501158618447e-17	4.72917621949623e-18	3.71090717072833e-17	5.98624116289988e-18	2.15431257951853e-18	1.46521478496582e-17	1.08814513928173e-16	7.04281622440537e-18	1.09617172377861e-16	1.10759925419727e-16	1.09325330873925e-16	8.39852460510015e-17	1.05783477349319e-16	1.03712162080787e-16	1.09188583404027e-16	1.07387352593918e-16	4.60648510202298e-17	1.08329289377972e-16	1.13152647966895e-16
2008197	16	1.19954751231075e-16	4.37174142725782e-18	3.49615665455623e-17	4.10864213815187e-18	3.08368437873733e-18	1.22503356530638e-17	1.08248271511118e-16	1.0130507619114e-17	1.0831476458872e-16	1.0772914405928e-16	1.10432040916367e-16	1.09488845558115e-16	1.61607816548026e-17	9.50266426844534e-17	1.10815005419646e-16	1.0702144272627e-16	3.32704574020699e-17	1.08007018487377e-16	5.99151953905421e-17
2008197	17	1.20021965902395e-16	4.95658981271249e-18	3.2790124071115e-17	3.03679329023297e-18	4.94210789182968e-18	1.13172053630985e-17	1.06613496185617e-16	1.35855363892104e-17	1.0818928350156e-16	1.06454323852699e-16	9.39989053220422e-17	1.08898761447665e-16	1.12395874664166e-17	1.039737117057e-16	1.11300749312539e-16	6.25055078893105e-17	2.29931048043749e-17	1.08572085894511e-16	1.18203170033645e-16
2008197	18	1.17503614043929e-16	7.51266269242796e-18	3.11698559878034e-17	2.52015327329754e-18	7.19065360498879e-18	1.11704342798175e-17	1.05743528731978e-16	2.98736396111091e-17	1.08326414227599e-16	1.06351779485224e-16	7.13826796918879e-17	1.078459103916e-16	1.05455481869499e-16	1.04475478247512e-16	1.05587920598829e-16	4.38047106224243e-17	1.53347789029362e-17	1.08469346607132e-16	1.19836947322493e-16
2008197	19	1.10812673735032e-16	2.95002425971505e-17	2.89477221256694e-17	2.40880736590542e-18	9.67745522571231e-18	1.12817847156749e-17	1.05653333000318e-16	1.21189527288264e-16	1.07368600613419e-16	6.53117240764976e-17	5.49091115433903e-17	1.07631648377925e-16	1.05336983460415e-16	1.0436660702652e-16	9.46380417556719e-17	3.55700525232218e-17	1.01174926880253e-17	1.06013247190546e-16	1.19002446038489e-16
2008197	20	1.08929189295613e-16	6.07910564870439e-17	2.7758375278099e-17	2.81802202332686e-18	1.27593028658714e-17	1.18831738294293e-17	1.058535117655e-16	1.18271421934665e-16	1.06047289299082e-16	8.69291371043271e-17	4.62310948614178e-17	1.0755864082902e-16	6.40055967481883e-17	1.06563384771308e-16	8.5876724107486e-17	3.13215875174795e-17	6.87553481792897e-18	1.0361558345958e-16	1.02222069787302e-16
2008197	21	1.090059218959e-16	5.59284131785627e-17	2.67622307153451e-17	4.06911909746982e-18	1.90644829801021e-17	1.30712926078522e-17	1.05959311365245e-16	1.16575763555511e-16	1.06131256453728e-16	1.01101294573965e-16	4.84900270501976e-17	1.07649218351059e-16	5.48935294131756e-17	1.08372694279821e-16	7.73311112333309e-17	2.92528307605909e-17	4.8330025423337e-18	9.65477805015513e-17	7.67901112650171e-17
2008197	22	1.04287617663306e-16	4.88854026788705e-17	2.59207420649917e-17	7.2746156760068e-18	6.01420302173419e-17	1.49767131807536e-17	1.0642698793822e-16	1.13545337473622e-16	1.06211964443789e-16	1.07482784596477e-16	6.0225721901654e-17	1.07061714483619e-16	5.69548703657973e-17	1.09340195363243e-16	7.00219848834416e-17	2.81063628991879e-17	6.10885240804408e-18	9.9000179461731e-17	1.08903547478185e-16
2008197	23	9.70088257860388e-17	5.59435520440135e-17	2.52741256395283e-17	3.15331349626276e-17	1.19967273193609e-16	1.77358240895751e-17	1.06699716993821e-16	1.11417198307542e-16	1.03348018318358e-16	1.07379268586371e-16	7.70442338649915e-17	1.0732666240062e-16	5.66354891253435e-17	5.97420097704547e-17	6.68794083695193e-17	2.71927077999893e-17	4.94187956925455e-17	1.07419081639727e-16	1.07565393941929e-16
2008198	0	1.00479110007993e-16	1.07541699898823e-16	2.47653465752187e-17	6.56496222379014e-17	1.1762777455081e-16	2.1779563070116e-17	1.06665399847851e-16	1.09678120176839e-16	9.72115972449602e-17	1.07332097376174e-16	1.09510559180693e-16	1.07853193060615e-16	5.21755461006709e-17	4.56540568943401e-17	6.46829041064061e-17	2.63449672598382e-17	7.88943486323705e-17	1.07130324039734e-16	1.0801537697349e-16
2008198	1	1.08523496499425e-16	9.27283424396082e-17	2.43878504084881e-17	8.69687630637822e-17	1.15347256457264e-16	2.54822045496672e-17	1.06410417975202e-16	1.09411137945006e-16	1.07126626504245e-16	1.0781592605744e-16	1.08824250235671e-16	1.09405006300047e-16	4.51606288261864e-17	4.27405146869536e-17	6.09844878227349e-17	2.56314005706933e-17	7.93862040865176e-17	1.08247842236446e-16	1.08533105836815e-16
2008198	2	9.18425837272697e-17	1.01869790759289e-16	2.41077694070489e-17	7.93963789446867e-17	1.14696220555118e-16	2.86928052603527e-17	1.06496931652573e-16	1.08000694834546e-16	1.07105646103872e-16	1.09031528041298e-16	1.08214473154367e-16	1.1068418923944e-16	3.47422100833486e-17	4.07253604599539e-17	5.8318809139813e-17	2.48302765340349e-17	7.15262691394769e-17	1.0048495477455e-16	1.08712449742973e-16
2008198	3	1.08073322907396e-16	8.41056799500203e-17	2.39339995582128e-17	1.13613790057359e-16	1.13748471812131e-16	3.26826111679223e-17	1.06425565943151e-16	9.47525113254048e-17	1.10730874857918e-16	9.60692310953226e-17	1.07223438149867e-16	1.09834541704438e-16	2.75783414923849e-17	3.86175827484855e-17	5.57865066600348e-17	2.34237633312258e-17	1.17982289547928e-16	9.22633705971323e-17	1.10244158457251e-16
2008198	4	1.08641408598068e-16	7.80957203963018e-17	2.38935102044614e-17	1.15869625625503e-16	1.13231421110058e-16	4.47493324428818e-17	1.06326502008105e-16	9.02558983652443e-17	1.11246962204491e-16	6.25349982307046e-17	1.06369513377979e-16	1.09337919951074e-16	3.01351319692753e-17	3.63372720322949e-17	5.29446927304129e-17	2.28185814155413e-17	1.19404174645246e-16	7.99350492860478e-17	1.08433570145041e-16
2008198	5	9.89076960163689e-17	7.81757499419721e-17	2.38624479281495e-17	1.15088438920937e-16	1.0424744942575e-16	7.51600594193848e-17	8.51607357854175e-17	9.0841276580872e-17	1.13360394250684e-16	4.19374054050716e-17	1.0697388060814e-16	8.49486223850721e-17	3.45240117399883e-17	3.29367555954868e-17	5.00690016161567e-17	2.22730377868812e-17	1.19936457486954e-16	6.51947388793183e-17	2.17482815418262e-17
2008198	6	6.59043292729793e-17	1.15172019789472e-16	2.35978711361091e-17	1.12821311252979e-16	6.04764489141013e-17	1.08600021975199e-16	5.76512662626899e-17	8.1058318024094e-17	1.11085949288376e-16	2.84735277410745e-17	1.0571280630964e-16	6.78972141543764e-17	1.04739963939413e-16	2.42851175517302e-17	4.67605593090785e-17	2.15362622588997e-17	1.20015730060576e-16	5.36563813355984e-17	2.67746463946681e-17
2008198	7	4.2615765313898e-17	1.09113228830995e-16	2.57111891251027e-17	1.11805661429574e-16	5.62011581081019e-17	1.12383887878206e-16	3.8319689406554e-17	9.45583023482334e-17	1.01389674375194e-16	2.05016494232996e-17	1.05875666772027e-16	6.02150520451309e-17	1.04453555997704e-16	1.80984284701487e-17	4.22825166299273e-17	2.09950517042937e-17	1.16139349498863e-16	6.90280648196781e-17	4.19136031082174e-17
2008198	8	2.96352554508841e-17	1.07429744632768e-16	2.7682937333652e-17	9.77105465977652e-17	7.42469899254896e-17	8.71377890406099e-17	2.43383791546639e-17	9.39515455304291e-17	8.71769075742973e-17	5.76629704853298e-17	9.81837868092641e-17	5.49033138062781e-17	1.04333553354654e-16	1.04905335381791e-16	3.90746617883959e-17	2.04799497716059e-17	1.14413591473143e-16	9.38678433765462e-17	5.07654849117483e-17
2008198	9	2.18194369675903e-17	1.01263641737181e-16	1.16654160407659e-16	1.02628563216819e-16	7.38742841500997e-17	8.75483237320305e-17	2.14574367930884e-17	8.0165311818601e-17	6.81126278473004e-17	8.05286033198776e-17	8.87447400348124e-17	5.06945434263457e-17	1.04580213694927e-16	9.6498513248435e-17	3.64624022618492e-17	1.23100974434685e-16	1.1381344191335e-16	1.04320281784913e-16	5.23905510245206e-17
2008198	10	1.77075925723596e-17	9.48835128667605e-17	8.87302211398829e-17	1.04743876395634e-16	7.8194862231515e-17	1.07493406355932e-16	3.66579552334462e-17	6.21961590686641e-17	4.76479478619223e-17	8.25137240156094e-17	8.16868147384687e-17	4.89059794302147e-17	9.10301513560495e-17	8.61411608011732e-17	3.39862911095201e-17	1.17955480977534e-16	1.13431572252144e-16	8.03408881419481e-17	5.09959160817312e-17
2008198	11	1.659757129687e-17	1.05002540377633e-16	6.7236932249688e-17	9.08776853767632e-17	7.90602304071474e-17	9.30462293025581e-17	4.50386593402393e-17	4.61939490588751e-17	3.50095852001574e-17	9.4298026209748e-17	7.55658752663872e-17	5.16832040479963e-17	8.71034118776265e-17	7.96845974733538e-17	3.38769617542547e-17	1.22949930034292e-16	1.0831177740705e-16	6.96384171413016e-17	4.60015107176073e-17
2008198	12	1.8172240351528e-17	2.80948609766821e-17	5.6556190717338e-17	9.80621846781735e-17	7.395157610835e-17	1.09177426368638e-16	5.78172336359414e-17	3.43459143698794e-17	3.29298784969461e-17	9.69500321200377e-17	6.98603390488959e-17	6.26629448181346e-17	6.63266010293562e-17	7.11826867648229e-17	4.03543458688298e-17	1.00656040435835e-16	9.88215777703942e-17	7.15437752927227e-17	3.88595600705668e-17
2008198	13	2.65210601175829e-17	4.08980412622388e-17	5.13670037916939e-17	1.0434046979473e-16	6.33761115810507e-17	1.07380324265007e-16	9.48626042558931e-17	2.57197628443163e-17	4.08360219032594e-17	1.07137433077435e-16	6.47124355232941e-17	6.98975018373341e-17	5.60338934530812e-17	6.14709788931386e-17	5.95511189872627e-17	1.12695153724555e-16	9.40668110553709e-17	9.81755297098897e-17	3.39587364923975e-17
2008198	14	4.14418436578795e-17	9.39287929120591e-17	4.93084706142629e-17	9.05696518719102e-17	5.26846734189191e-17	8.3300392445361e-17	9.73960002132902e-17	2.02604128297022e-17	5.9972202559979e-17	1.08203604833495e-16	5.9929977893278e-17	1.08006074376802e-16	5.20563360665853e-17	5.26169867430771e-17	6.78593518682708e-17	1.22895230939803e-16	8.88753461414754e-17	9.83935182481525e-17	3.27650991876637e-17
2008198	15	6.22887629192655e-17	6.24466088316254e-17	4.93077585247521e-17	6.62187388575752e-17	4.35636954176478e-17	6.07326735922219e-17	1.00281327739514e-16	1.77853026599425e-17	9.75256085285009e-17	1.01431369497511e-16	5.56637871770828e-17	1.06686121399157e-16	6.97289303097166e-17	4.49905893813761e-17	8.34363992422642e-17	1.22863815423357e-16	1.08530701491603e-16	1.04448870637303e-16	3.41905108823932e-17
2008198	16	9.25650283936825e-17	4.515118811611e-17	5.03026701418026e-17	9.18420833104408e-17	3.43473287046389e-17	8.56280032007439e-17	1.00066177963689e-16	1.86800922605121e-17	8.91223457241393e-17	8.68596682829143e-17	5.19465779992491e-17	1.06196930469818e-16	7.48358404994033e-17	4.35531470050089e-17	9.42329979444344e-17	1.22580065837516e-16	1.08600266143273e-16	1.04348155736122e-16	3.7261673995113e-17
2008198	17	9.74663518567687e-17	3.64502952281855e-17	4.97535884684505e-17	6.56194341296254e-17	2.66320516143066e-17	1.08462745191794e-16	9.1376363779728e-17	2.37980261440432e-17	9.90616952512311e-17	7.18802725727353e-17	4.85790613056638e-17	1.06430037719663e-16	8.20688011578681e-17	7.03847356587574e-17	1.04138123602436e-16	1.2155344560401e-16	8.62101387458629e-17	9.43058718520198e-17	4.15759391419151e-17
2008198	18	9.98157682733707e-17	3.1237605278155e-17	4.69667817445011e-17	4.94371608914831e-17	2.20334622146554e-17	1.08351693376636e-16	7.71740011763594e-17	3.29931212964546e-17	9.63889604457984e-17	5.99312805723656e-17	4.54763667009782e-17	1.07194893500379e-16	1.07817234555977e-16	7.81740536380537e-17	9.8013430882761e-17	1.20520250958659e-16	6.31750028585207e-17	7.69635978176155e-17	4.46038455979313e-17
2008198	19	1.10451819425108e-16	2.80210934342598e-17	4.3771220012879e-17	6.54979022371814e-17	2.1164499420602e-17	1.08507293780069e-16	6.34308710319933e-17	4.4794556174125e-17	8.63273647073636e-17	5.18606469898498e-17	4.37170743967112e-17	1.08227507290099e-16	1.08260892564031e-16	1.10675082976439e-16	8.61152697158947e-17	1.12347346894494e-16	5.08922375556551e-17	6.17987853389376e-17	4.53456716977269e-17
2008198	20	1.04917576101561e-16	4.60088910927796e-17	4.15538430353083e-17	9.48380131924676e-17	2.34239597088671e-17	1.08689116611902e-16	5.45726871354011e-17	5.85364119933723e-17	7.15278512398407e-17	4.84666628931825e-17	6.23730254283596e-17	1.1048184302185e-16	7.98900727310798e-17	9.49042914707196e-17	7.9998935916001e-17	1.08611899962112e-16	4.29443706623745e-17	5.45750472685738e-17	4.25272597736706e-17
2008198	21	9.63338545411419e-17	7.7611691406858e-17	4.03711829679897e-17	6.65110968465545e-17	2.85348212842456e-17	1.09768403128372e-16	4.9415359360845e-17	1.07284400186247e-16	6.01401630153466e-17	4.87549601261676e-17	1.08583107359238e-16	1.15885570315308e-16	5.3351977971504e-17	6.87137511213778e-17	7.84514866280677e-17	1.14938946141886e-16	3.75238757724369e-17	8.87773370221243e-17	3.75711780269904e-17
2008198	22	8.85412440881554e-17	1.0911292497223e-16	3.98044552489938e-17	4.47218612053377e-17	1.07246776661512e-16	1.10978694038205e-16	4.75095871855736e-17	1.02114238516726e-16	5.59122250944613e-17	5.13752002349365e-17	1.08472610653775e-16	1.07154357878455e-16	5.29683442035284e-17	6.52067634263361e-17	7.92531366189471e-17	1.07133358857341e-16	4.21834262586078e-17	8.89691107419277e-17	3.35206118572594e-17
2008198	23	8.16939708562627e-17	1.08571572667334e-16	3.99026737017323e-17	3.51600084933599e-17	1.02323375149619e-16	1.11209171821289e-16	4.79235770844015e-17	1.07562071219081e-16	7.4771937468346e-17	1.07268916362021e-16	1.08721295745302e-16	9.74517898747968e-17	5.13001372421697e-17	6.75856303414393e-17	7.76004923055938e-17	1.00620431930093e-16	4.33264451532333e-17	9.80011695522127e-17	3.09863544647821e-17
2008199	0	7.4847312722728e-17	1.07743948276795e-16	4.08834686913728e-17	3.43569818983286e-17	1.01519810884916e-16	1.10610168710101e-16	5.52455403306165e-17	1.08171990381135e-16	1.07402789317724e-16	1.07199776280818e-16	1.08638521661511e-16	9.25561992240978e-17	5.2187468189765e-17	7.3525873417667e-17	7.63009624236887e-17	1.18242110916795e-16	6.40217988266528e-17	1.01625740900563e-16	3.50677097141994e-17
2008199	1	6.79201468067776e-17	1.07876763256833e-16	4.62500042439206e-17	3.99076519858849e-17	1.02221392855946e-16	1.09316198999639e-16	7.14299479991577e-17	1.10688239727343e-16	1.0069171913074e-16	1.08698650471464e-16	1.08755954593479e-16	1.14089851161563e-16	5.3833592602583e-17	7.97920974769135e-17	8.26451707103769e-17	1.09560234229532e-16	1.07762178394474e-16	1.07423288352202e-16	4.19030947068336e-17
2008199	2	6.05107411174112e-17	1.0882780263672e-16	5.0275293524876e-17	4.93454593402983e-17	1.07827613444688e-16	1.09421691650923e-16	8.76558477575785e-17	1.0269398666224e-16	1.02364517077013e-16	1.08156394489167e-16	1.09525680219509e-16	1.13136085960991e-16	5.43533512996314e-17	7.69802661391841e-17	1.10841172498942e-16	1.06941212043102e-16	1.02482422694797e-16	1.07293979287943e-16	4.54084311494688e-17
2008199	3	5.28413120312389e-17	1.11869233279861e-16	5.71136865352575e-17	1.10197887652869e-16	1.08452517035549e-16	1.09733581860454e-16	9.79374157904667e-17	8.92915323357747e-17	9.18512602364658e-17	1.0878565885624e-16	1.09533765328588e-16	1.13049624008531e-16	5.43694965681693e-17	7.37676792358763e-17	1.08284529465764e-16	1.06219417826211e-16	9.60979110538961e-17	1.07405036588045e-16	4.06871244311408e-17
2008199	4	4.68791210172139e-17	6.97922021068825e-17	6.40608995823882e-17	1.10825989902094e-16	1.07747622377638e-16	1.11013017984125e-16	9.15308009333484e-17	7.85846301799838e-17	9.21985890603291e-17	1.08753276465647e-16	1.04749756845003e-16	1.13619924302006e-16	5.3925691289786e-17	6.83407010944244e-17	1.08119669095967e-16	1.03004515974342e-16	8.8915003107447e-17	1.07928360804537e-16	3.29628689811951e-17
2008199	5	4.34061663866683e-17	5.25903633019551e-17	7.13408810780126e-17	1.08383880416061e-16	1.0430234107834e-16	1.10061753778425e-16	1.08578711057382e-16	7.20025889382975e-17	9.77637858859415e-17	1.0858684395206e-16	1.03183364414481e-16	1.14129617953337e-16	5.23076160649514e-17	1.22081174688863e-16	1.075778936373e-16	9.56561615885095e-17	1.00532699461936e-16	1.10357734126822e-16	2.66405391382023e-17
2008199	6	4.19652386974343e-17	4.72594860305891e-17	7.41518370904336e-17	1.02154472113921e-16	1.00309277658075e-16	1.08506704866945e-16	1.07978247445349e-16	6.80849968268401e-17	1.02238922875907e-16	1.08245803565975e-16	1.0567789903003e-16	1.13486033549752e-16	5.05193435461447e-17	1.22542172896688e-16	1.06775994441935e-16	1.10986195898306e-16	9.33640581718087e-17	1.10876686324816e-16	2.08792422521139e-17
2008199	7	4.30140620194854e-17	1.13472543725581e-16	7.56243774370806e-17	9.81578473664111e-17	9.54357200928621e-17	9.68707245823175e-17	1.06792228661452e-16	6.73493493962362e-17	1.07509647333055e-16	1.01907146890864e-16	9.63472372969627e-17	1.1181804900049e-16	5.10396743447726e-17	1.22460728306722e-16	1.0093311697573e-16	7.71327386907212e-17	1.02005865717469e-16	1.18128714822094e-16	1.62057729134485e-17
2008199	8	4.91157142555332e-17	1.11457969593715e-16	1.09412959111132e-16	9.45336604264015e-17	9.05408689371683e-17	9.24393160765335e-17	1.001828801762e-16	7.12364122038772e-17	1.07397662397607e-16	1.01176217658858e-16	9.32022528599316e-17	8.94920472949372e-17	1.10384341024985e-16	1.15191243696918e-16	9.82916478463704e-17	1.12794818339017e-16	1.03092761324301e-16	1.17527377794229e-16	1.26853494648696e-17
2008199	9	5.7955112919685e-17	1.0676602277392e-16	1.10410100460437e-16	9.14654401988139e-17	8.62057332488931e-17	8.77762788460657e-17	1.06017145682247e-16	7.25192963849068e-17	1.07255927292773e-16	9.94430044823771e-17	1.09126045203883e-16	7.751120562746e-17	9.40947077928259e-17	1.14137446762483e-16	8.3091879525706e-17	1.13475290738429e-16	9.20654324549227e-17	1.17021623463992e-16	9.84256443063021e-18
2008199	10	6.64293166109891e-17	1.06417411573648e-16	1.21414012944888e-16	8.98248067103735e-17	8.30373923993848e-17	8.36402914156012e-17	1.04365634494151e-16	6.93880334986227e-17	1.08961763729558e-16	1.00941541182476e-16	1.06028009157306e-16	7.31201625953428e-17	8.42277418790924e-17	1.0864790331015e-16	7.58885198919559e-17	1.1425318125601e-16	8.9656455334408e-17	1.18464518399227e-16	8.15878804203928e-18
2008199	11	7.09962404754116e-17	1.00704593304762e-16	1.19788539210864e-16	8.55326439978272e-17	8.16463721413549e-17	7.90444138039848e-17	9.53048081967499e-17	6.39294514617036e-17	1.09979556985581e-16	7.99105194513458e-17	8.58319071565616e-17	6.98945006206904e-17	8.50377243943066e-17	1.00519449288682e-16	8.13164635259391e-17	1.14431532273594e-16	8.99600306152492e-17	1.16763450009838e-16	8.16789978809857e-18
2008199	12	7.38905210324463e-17	9.39693681362001e-17	1.13604818136702e-16	8.09892189601767e-17	8.05077547309435e-17	7.27197021173532e-17	8.49605570818124e-17	5.92277412746812e-17	1.0430716482916e-16	7.11383094750972e-17	7.73884168860273e-17	6.81133468000183e-17	8.60103371102816e-17	9.54403303410948e-17	7.86706742005629e-17	1.14523533660681e-16	9.0081618026085e-17	1.10869737064973e-16	9.15760289711746e-18
2008199	13	8.26066487600196e-17	1.06422919234015e-16	7.91342722536483e-17	8.17542906289391e-17	7.81657518258013e-17	6.66575393179194e-17	7.45844376071739e-17	5.64950671018942e-17	9.94779229875957e-17	7.73244028459741e-17	7.3622143749524e-17	6.82027562989893e-17	8.80623826001652e-17	9.15999204129811e-17	7.49326486826532e-17	1.14725332106918e-16	8.81352306040799e-17	1.062651349665e-16	1.05002488899466e-17
2008199	14	9.52493688819798e-17	1.00452976375909e-16	5.77097217643029e-17	8.33856341140921e-17	7.54838792567881e-17	5.95426316701332e-17	7.07301798675201e-17	5.59685518600299e-17	1.07876709751119e-16	8.97961199030919e-17	7.30131436885915e-17	6.96546954642714e-17	8.98196704658402e-17	8.50441950832332e-17	7.20449023198321e-17	8.57455789810416e-17	8.63849455491876e-17	1.02009374902873e-16	1.2351257791323e-17
2008199	15	1.01512776393213e-16	1.04953126153382e-16	4.44295866266601e-17	8.44200872250934e-17	7.24296026590042e-17	5.25474322632719e-17	7.41816782624921e-17	5.68637438651769e-17	1.07463042225758e-16	9.81782241357382e-17	7.47225531225655e-17	7.0431931098142e-17	8.75304351499524e-17	7.64418563709893e-17	6.9644330910808e-17	6.96934918500327e-17	8.45677913367001e-17	9.79533446649463e-17	1.50480246851346e-17
2008199	16	1.04961065753623e-16	1.05702131207796e-16	3.56456259753554e-17	8.45737414556795e-17	6.89266297035315e-17	4.63868501338964e-17	1.05062632536602e-16	5.79860903908631e-17	1.07402343630643e-16	9.6759720772239e-17	7.85883850149801e-17	7.02658131034662e-17	8.77479817778935e-17	6.8249711420277e-17	6.77161034511493e-17	6.08935333852737e-17	8.21608981859844e-17	9.55578042668257e-17	1.81496932878361e-17
2008199	17	1.05060609640172e-16	1.05568191820436e-16	2.99545014654288e-17	8.70185589670165e-17	6.59034295180098e-17	4.13653488980388e-17	9.89438371817725e-17	6.05121771260583e-17	1.08200469840262e-16	9.83529460478666e-17	8.60028807056632e-17	7.11896299873101e-17	8.6809508321778e-17	6.17878480783813e-17	6.78074439735834e-17	5.91920935206621e-17	7.97075494976067e-17	9.36952031740512e-17	1.89321632372387e-17
2008199	18	1.06389705187898e-16	9.07683725788842e-17	2.6084923362323e-17	8.92239855828681e-17	6.33592251089477e-17	3.68714325466454e-17	1.04462622505394e-16	7.92380964492119e-17	1.04561672908389e-16	1.09154617156931e-16	1.07791725909168e-16	1.14940762601313e-16	8.7457952555425e-17	1.21425192894517e-16	8.33679032159884e-17	5.81702580247523e-17	7.69812935476867e-17	9.1802673787218e-17	1.67054766698874e-17
2008199	19	1.03064912282529e-16	5.44949062795544e-17	2.43949964667474e-17	8.61513965101046e-17	6.11788087536601e-17	3.27172485619551e-17	1.14164196217261e-16	9.92280223356124e-17	9.83243654879189e-17	1.12239413458683e-16	1.09804227882169e-16	1.12524469060187e-16	1.13776959243281e-16	1.20335225085994e-16	7.77070149441144e-17	5.62999229904937e-17	7.34255989747376e-17	8.99846132982643e-17	1.5839586821623e-17
2008199	20	1.01694446248493e-16	3.12686758877854e-17	2.3950709198095e-17	8.69370643763433e-17	6.29971563922453e-17	2.97587527443923e-17	1.01907354793928e-16	9.66984183335475e-17	9.65548116247948e-17	1.14528489825658e-16	9.34618939464479e-17	1.04334601621387e-16	1.15178840806889e-16	1.2004423130796e-16	7.28814439439566e-17	5.60133804169224e-17	6.96683557302131e-17	8.90095090840659e-17	2.10247877120987e-17
2008199	21	6.18217875026803e-17	1.96763553111439e-17	2.53809408620433e-17	1.16027076230966e-16	7.09102698177656e-17	2.72544093631827e-17	9.36276627502336e-17	9.04905846673599e-17	9.90567653600924e-17	1.09877917666581e-16	9.1441977522375e-17	1.07324331224903e-16	1.1991156956988e-16	1.19410462689121e-16	6.83547897325593e-17	5.58790855699431e-17	6.86426976732888e-17	8.99214328827644e-17	2.52724710748336e-17
2008199	22	8.56380730277783e-17	1.38707441370982e-17	2.78099181014073e-17	8.86073956001291e-17	1.06439467515321e-16	2.76483126330563e-17	8.74846411864745e-17	9.01455645435373e-17	9.32144350385173e-17	1.15312616328322e-16	9.03508516573188e-17	1.07852851691441e-16	7.46800438890652e-17	1.18697864968508e-16	6.54309204587262e-17	5.57153876043083e-17	7.06709733838605e-17	1.00193089307532e-16	2.53730141747361e-17
2008199	23	3.934521811187e-17	1.08857286263903e-17	2.97340667726432e-17	7.43584720721632e-17	1.00721175438667e-16	2.87382824354285e-17	1.1594956390616e-16	9.30370507911233e-17	8.5767706404155e-17	8.88577621270579e-17	8.91335536421572e-17	1.07782760063459e-16	6.65870932728146e-17	1.18642610799726e-16	6.37129937486395e-17	5.50132599906709e-17	1.16425260156131e-16	7.41719043781171e-17	2.46239662971915e-17
2008200	0	2.92784924337714e-17	9.34913993666075e-18	3.077996430658e-17	6.15654210961764e-17	8.03383662894053e-17	2.81121607757515e-17	1.17492701627046e-16	1.0003623528867e-16	7.80972351000404e-17	6.28432685848886e-17	9.08179236463739e-17	1.07800472584043e-16	6.60696527043035e-17	1.20335077578015e-16	6.25222290261313e-17	5.44005519028625e-17	1.17732129018547e-16	5.88764295974229e-17	2.23281631940396e-17
2008200	1	2.4834424944394e-17	8.68353084454452e-18	3.08857932822151e-17	5.08839053839795e-17	7.01434178769835e-17	2.63596697257022e-17	7.13969094810491e-17	1.0318671249786e-16	8.50172311068586e-17	4.66463839970692e-17	8.89000057443037e-17	1.09809705721855e-16	6.52129485245632e-17	1.05966302271674e-16	6.11127192417498e-17	5.36282528773988e-17	1.16744005045471e-16	5.72065395007374e-17	2.01728653649707e-17
2008200	2	7.37588716201821e-17	8.62242060893194e-18	3.29717779596952e-17	4.2567381568304e-17	9.17600198302151e-17	2.4206822626486e-17	6.57026369092363e-17	1.00691194141538e-16	9.16360052797038e-17	3.94252305144694e-17	8.73392620851359e-17	1.10769482646421e-16	6.5933949184967e-17	1.05304940317292e-16	5.98190955256811e-17	1.18092009525439e-16	1.16495221272101e-16	3.63368935637597e-17	1.77924293676085e-17
2008200	3	1.08762763768694e-16	8.89980738239596e-18	9.92103943566537e-17	3.71617354856721e-17	9.74895286161224e-17	2.22081246483101e-17	5.75808459796917e-17	9.99279428065341e-17	8.41264001012119e-17	4.89243448759007e-17	8.81466941757515e-17	1.11764707769026e-16	6.59486493813471e-17	8.15979736148484e-17	6.35926119057109e-17	1.18217793779945e-16	1.20951901809351e-16	3.4169165226125e-17	1.64647169356484e-17
2008200	4	1.08583731357192e-16	9.21044984754518e-18	6.76098615282249e-17	4.30375678074136e-17	1.00045052444168e-16	2.05835011643219e-17	4.95682517330434e-17	1.03016130114193e-16	7.91991932669262e-17	6.0441895692661e-17	9.01646857440655e-17	1.12530568999432e-16	6.44678724615652e-17	6.86872912964215e-17	6.19982614949782e-17	1.19508760629005e-16	8.8322278758972e-17	4.42159030694902e-17	1.56740217520925e-17
2008200	5	9.59855871147798e-17	9.13200840704101e-18	5.36589258654013e-17	1.19745611540457e-16	1.03493317412188e-16	1.90120276196496e-17	4.73668916629929e-17	1.05563680555964e-16	8.34480140614887e-17	1.09689416765895e-16	8.88608749060061e-17	1.10646820755889e-16	6.37110066520545e-17	1.2321677354114e-16	6.33277262450464e-17	1.21779560491698e-16	7.70424825091856e-17	7.07344352713217e-17	1.52007388809266e-17
2008200	6	8.38538830037876e-17	8.76831947785026e-18	4.42442395032875e-17	6.71735106098836e-17	1.0895157086143e-16	1.90091351724924e-17	5.53702208566403e-17	1.10081576463903e-16	1.03301906750822e-16	1.109281102731e-16	9.29516623159047e-17	1.03398493651187e-16	6.55156262764394e-17	1.23518080690464e-16	6.51047043245652e-17	1.22879668790009e-16	7.26340325184811e-17	8.53294509190269e-17	1.50584871927909e-17
2008200	7	8.77201807143968e-17	8.43247464654982e-18	3.88990585402417e-17	4.11823851066218e-17	1.0901826930926e-16	1.2288082966926e-16	8.78808160223282e-17	1.10164451528755e-16	1.15025774749049e-16	1.1274070981782e-16	1.06667529799093e-16	9.87158075306966e-17	7.0858375946027e-17	1.23305922465295e-16	6.58422066516341e-17	1.23254216844199e-16	6.88406923607564e-17	9.57458335312061e-17	1.50986311294445e-17
2008200	8	9.64718045832843e-17	8.97374536444816e-18	3.33051126883158e-17	2.67146140624092e-17	1.09058443092016e-16	1.22795721623675e-16	9.67054492933302e-17	1.10034823634372e-16	8.25927250001262e-17	1.06126706026939e-16	1.13480665894276e-16	9.57153708857841e-17	7.73313847468095e-17	1.22946987610376e-16	6.69911357096435e-17	1.23247578551293e-16	7.67693934437703e-17	1.0215397430822e-16	1.50710937545332e-17
2008200	9	1.0182265608884e-16	9.06848749754123e-18	1.22651685751933e-16	1.81879693930681e-17	1.09604267763422e-16	7.92062095213312e-17	9.99929790063077e-17	4.71502636615236e-17	7.12389191731402e-17	1.02882037992204e-16	1.1067467961561e-16	9.66906821164249e-17	8.87064871812504e-17	1.22140519282145e-16	7.16475776869511e-17	1.23267245548379e-16	8.11700410620558e-17	1.11107004798483e-16	1.46161456374328e-17
2008200	10	1.0385557474492e-16	8.31090516429664e-18	1.22875043623119e-16	1.38409361867859e-17	1.11163579146935e-16	5.41252141678495e-17	1.00077833793893e-16	2.89691988719752e-17	7.64667907355993e-17	9.78920166233767e-17	1.00829552864618e-16	9.67178519561024e-17	8.67179044876372e-17	1.21525872389185e-16	7.42528984208465e-17	9.18362593540751e-17	9.59974006658628e-17	1.1933578450669e-16	1.37050904798939e-17
2008200	11	1.06053826176572e-16	8.1748059230063e-18	1.22810001834308e-16	1.20476905009464e-17	1.13205465759597e-16	3.79101944967732e-17	9.84233420596282e-17	2.82358049825477e-17	1.08144129242384e-16	9.87771184729354e-17	9.22465007432641e-17	9.4509614889127e-17	7.8255847732773e-17	1.06360524149915e-16	7.4972335816339e-17	1.1608964145702e-16	1.15988692627575e-16	1.1668356047484e-16	1.42243173354851e-17
2008200	12	1.12100629979192e-16	8.65802957503901e-18	6.71062252672226e-17	1.12283106149538e-17	1.04697137993719e-16	2.56658077029254e-17	1.00937321139997e-16	4.47177735118191e-17	9.63473687353733e-17	1.08511134288567e-16	8.65990476924491e-17	9.25138976805192e-17	7.13335773609158e-17	1.24678431477841e-16	7.44580712799474e-17	1.23221496249072e-16	1.13467327170652e-16	1.14706351546668e-16	1.05711425224906e-16
2008200	13	1.11881673531941e-16	9.93566183978402e-18	3.26640409136247e-17	1.04177901368162e-17	8.94200798704516e-17	1.8077914870336e-17	1.0656747440533e-16	1.10034102229292e-16	8.66682863662743e-17	1.08089976545222e-16	8.49879267538828e-17	9.33410883853619e-17	6.56043227854725e-17	1.00519591341969e-16	7.33328339999492e-17	1.23032202072953e-16	1.14276028298341e-16	1.13072719768399e-16	1.02406747740433e-16
2008200	14	1.11960730319248e-16	1.51242681631351e-17	2.22617161413187e-17	9.81060925601453e-18	6.66020785630747e-17	1.39399538583599e-17	1.07730200579069e-16	8.12153795095095e-17	8.85334607329691e-17	1.07939896623552e-16	8.58413035118269e-17	9.14666801745191e-17	6.11205608394749e-17	8.52402413798619e-17	7.23138973409386e-17	1.23097117024353e-16	1.21218157013592e-16	1.11824710562837e-16	1.02032241806612e-16
2008200	15	1.12464605538255e-16	3.96350584135736e-17	1.10971381583424e-16	9.32346139694719e-18	4.52827156027736e-17	1.16311506717579e-17	1.08875296056106e-16	1.0172540324428e-16	9.41246253003632e-17	1.07875017681377e-16	8.7296434260962e-17	8.74295457016361e-17	5.74885160085182e-17	7.65859618968934e-17	7.20463827611119e-17	1.23163161888307e-16	1.22294939656211e-16	1.05239171558048e-16	1.06098002425113e-16
2008200	16	1.12538116803142e-16	6.18989156861426e-17	1.10601714413006e-16	8.61736969663709e-18	2.98646495991903e-17	1.06608293079335e-17	1.10607602578278e-16	9.87735269877514e-17	9.61840311673443e-17	1.07716054029473e-16	8.89237828784367e-17	8.26898156822525e-17	5.40229245530238e-17	6.82932296607804e-17	7.16627889240412e-17	1.22815094432559e-16	1.20938577205801e-16	1.04810148155379e-16	1.08142141769313e-16
2008200	17	1.12553379890259e-16	6.49363277166628e-17	1.12282595980367e-16	8.74623794825851e-18	4.48635810779485e-17	1.02474250177724e-17	1.13772201871651e-16	9.68494086672987e-17	9.80538820196746e-17	9.86623300773085e-17	9.0877454588065e-17	7.88000932477369e-17	5.08533637474145e-17	6.06156961013071e-17	7.08139232202738e-17	1.21950428264254e-16	1.17936455185744e-16	1.07351454810378e-16	1.08524604920682e-16
2008200	18	1.12718679728063e-16	7.82169659469833e-17	9.90363000172711e-17	9.77248685828526e-18	5.89983947753726e-17	1.00443150328376e-17	1.15535019434254e-16	1.02187829104025e-16	1.027309014283e-16	8.341221613024e-17	9.14174927897325e-17	7.46416439793524e-17	4.96464854069429e-17	5.43738317678308e-17	7.1211500742517e-17	1.21010165596059e-16	1.14891588412784e-16	1.11012711040085e-16	1.09224655404643e-16
2008200	19	1.12857149950242e-16	1.13675930391836e-16	6.90644264006319e-17	1.15178860340356e-17	4.71923812416781e-17	1.02575217928477e-17	1.16019254246809e-16	1.07273511564607e-16	1.07380910408764e-16	6.7855687461676e-17	9.16120312126716e-17	7.29005003418952e-17	1.14166054542345e-16	4.96564954031533e-17	7.13951286132707e-17	1.06991686878472e-16	1.12382242445395e-16	1.11538890778753e-16	1.09500963641767e-16
2008200	20	1.13809975755251e-16	1.13818394307644e-16	6.26759789922355e-17	1.43666211098047e-17	3.91637495154557e-17	1.09886339257569e-17	1.01071258941321e-16	1.07921641260737e-16	1.09734782334321e-16	5.9042043423914e-17	8.63733456200436e-17	7.08542561694633e-17	1.20153752240952e-16	4.6066211729533e-17	7.26421301428363e-17	9.50684731192645e-17	1.08344414331183e-16	1.11009222635869e-16	4.34549553865706e-17
2008200	21	1.14601560118133e-16	1.13322821501717e-16	6.0676667980017e-17	1.91167918655336e-17	1.11113140510777e-16	1.19985153752648e-17	9.02033334259576e-17	1.05382427629414e-16	1.09319341270193e-16	5.46937373092149e-17	8.24629529704761e-17	6.94179809731512e-17	9.07295838344862e-17	4.39108296294543e-17	7.6685493020278e-17	8.65592634135218e-17	1.05707154056028e-16	1.02081757881232e-16	3.87607681099516e-17
2008200	22	1.15174882516014e-16	1.12436699615799e-16	5.93039401928181e-17	2.58513226703026e-17	1.11825104433157e-16	1.31284624127171e-17	8.23114648438514e-17	1.0145923650309e-16	1.09936006420179e-16	5.33640278408036e-17	9.63429308679383e-17	6.83150482382432e-17	8.22946481294007e-17	4.30041336529426e-17	8.36787842696677e-17	8.9046199649951e-17	1.07545261100595e-16	9.46550928739499e-17	5.07435322105608e-17
2008200	23	1.15733200454337e-16	1.1134148435595e-16	6.0789262646947e-17	3.49925773793198e-17	7.43346537452052e-17	1.17175506769043e-16	7.46361039199209e-17	1.11477463784288e-16	1.10614916196749e-16	5.35962783752304e-17	1.083533971151e-16	6.70151673024575e-17	8.12651756218531e-17	4.26235463254377e-17	1.18786926781993e-16	1.23238596083184e-16	1.13475828630781e-16	9.14726603562167e-17	1.06277153787402e-16
2008201	0	1.15554036510986e-16	1.09848975693035e-16	6.03794705782262e-17	4.95663282533081e-17	7.17856556247859e-17	1.18033323592352e-16	7.01944204844796e-17	1.12639235456308e-16	1.11338416345711e-16	5.49039935354174e-17	8.32576640836503e-17	6.578084002807e-17	8.17095271349313e-17	4.25211740889066e-17	1.20040510204341e-16	1.23067666278003e-16	1.14619614946423e-16	8.55889393472766e-17	1.06484661764835e-16
2008201	1	1.1569380302798e-16	1.10421789710853e-16	5.89515392696588e-17	7.36883986486308e-17	7.64003092438469e-17	1.19602146490308e-16	6.78789149990471e-17	1.13526738710005e-16	1.11583313688071e-16	5.8765727077975e-17	9.96669002485961e-17	6.53749483253969e-17	8.04841591566437e-17	4.25490977969276e-17	1.14976970799656e-16	1.22742672606367e-16	1.20236482380531e-16	8.26023193487363e-17	1.06439019591611e-16
2008201	2	1.15659035980129e-16	1.03213804025857e-16	5.78094572030222e-17	1.18743570347822e-16	1.09998611623518e-16	7.20649414889677e-17	6.70588896718154e-17	1.14835452074168e-16	1.12951498921607e-16	7.00613458606792e-17	1.06042010442169e-16	6.50886108913672e-17	7.83147828761313e-17	4.23799837507672e-17	1.15575744725453e-16	1.15781900379722e-16	1.20514578794234e-16	8.21003964984295e-17	1.06303789086142e-16
2008201	3	1.1650406999634e-16	8.83178169062338e-17	5.76453664897316e-17	1.18203603138942e-16	1.10225191623843e-16	6.40000831567219e-17	6.73690411332093e-17	1.11383210109585e-16	1.13588052544414e-16	7.02156487373871e-17	1.08449977431701e-16	6.38827292322598e-17	7.56000083325275e-17	4.20097815641151e-17	1.21423584256111e-16	1.1161762309981e-16	1.20410621129457e-16	8.29224177985012e-17	1.06313770894811e-16
2008201	4	1.03151232530424e-16	8.67269961947686e-17	5.7514396939426e-17	1.17064499200724e-16	1.01807227474558e-16	5.97804487644839e-17	6.81461087110454e-17	1.08976938103661e-16	1.14184145275893e-16	7.26089925583888e-17	9.50314274997587e-17	6.36348956278016e-17	7.33548190409698e-17	4.34619440312386e-17	1.21726937036769e-16	1.1595530837161e-16	1.20409417785806e-16	8.35874436463417e-17	1.06383995258731e-16
2008201	5	9.20142879032941e-17	8.21762020919305e-17	5.76638373214599e-17	1.12727175868505e-16	9.94966802165425e-17	6.20378820514342e-17	7.82148781979292e-17	1.07236786561203e-16	1.146444556043e-16	8.94397290360856e-17	9.59706901256479e-17	6.4366696047643e-17	7.19806352571463e-17	4.60878689846273e-17	1.21304678784467e-16	1.11853687816333e-16	1.20607419396805e-16	8.32760663659399e-17	1.06267274724249e-16
2008201	6	4.07497647294548e-17	7.0943218802248e-17	6.9169925064168e-17	1.1076862972141e-16	9.19617616689265e-17	7.5725661982792e-17	1.18238494176541e-16	1.08694538675099e-16	1.15125034445798e-16	9.20605449198791e-17	9.67696757184469e-17	6.69839389834867e-17	7.14515785594861e-17	4.66048581292834e-17	1.19285238296979e-16	1.11899317150584e-16	1.20862227728818e-16	1.14455656605132e-16	1.06198297570599e-16
2008201	7	5.44386772446022e-17	6.5591271834895e-17	1.20195524637006e-16	1.10302541565886e-16	9.66805198104321e-17	8.95063504982362e-17	1.12964556850296e-16	1.13690377035678e-16	1.14526631562948e-16	8.9179160395838e-17	1.0373853547566e-16	6.89467453668058e-17	7.13285462182672e-17	1.2339460709751e-16	1.03852492041798e-16	1.12426160394502e-16	1.20220402933633e-16	1.04216943831711e-16	1.01078513621291e-16
2008201	8	8.52560911607108e-17	6.80787711201223e-17	1.16085629116628e-16	1.10370239072664e-16	1.0230021788566e-16	9.52309833346482e-17	9.47889616031684e-17	1.10745878176279e-16	1.15477386433816e-16	8.07041723467004e-17	1.1081142507154e-16	6.90196320196425e-17	7.42567196297529e-17	1.22357429518648e-16	8.57705397659934e-17	1.12743438058299e-16	1.1915742248557e-16	1.03976123573359e-16	8.84448471412805e-17
2008201	9	1.0199198166012e-16	9.68898853510117e-17	1.1244877610647e-16	1.00382088206604e-16	1.09884225333456e-16	1.2134258279562e-16	8.30802204282452e-17	1.05502573165559e-16	1.16756673660881e-16	4.68172542840364e-17	1.17070929940562e-16	6.75493127335887e-17	8.38695576128529e-17	1.16635780986943e-16	7.34381081824286e-17	1.12619235419018e-16	1.13567731574926e-16	1.05033639345423e-16	7.95809192653268e-17
2008201	10	1.0775973820057e-16	8.95402207737611e-17	9.56632173987439e-17	9.52193251515803e-17	1.08815998327664e-16	1.15253805937558e-16	8.71390752236532e-17	8.75762848824126e-17	1.13370999013428e-16	2.83332371117625e-17	1.18054368612603e-16	6.75120612264881e-17	7.74270130695163e-17	8.88444094576693e-17	6.611853594508e-17	1.12828094653698e-16	1.05820519389271e-16	1.08355831115664e-16	8.36209916226057e-17
2008201	11	1.0727813285951e-16	1.02494690814874e-16	8.68978433500768e-17	9.75425938609239e-17	1.01431029715852e-16	1.08681487405177e-16	7.68143364346151e-17	7.43415124193512e-17	1.06064622949831e-16	6.21148917233665e-17	1.19347174267613e-16	6.79701304629313e-17	7.2122801257769e-17	7.86078337625741e-17	6.32010041018849e-17	1.12248596125796e-16	1.0081095141825e-16	1.12667755630012e-16	9.8192400002062e-17
2008201	12	9.42642779086104e-17	8.88507468193416e-17	7.96277242966338e-17	9.71684745051346e-17	1.0710245073133e-16	9.36713512886793e-17	8.85133226941038e-17	8.72145926429277e-17	9.82943785182193e-17	9.43869132410446e-17	1.20552365310196e-16	7.14216005363573e-17	7.29238069879871e-17	7.12024364017632e-17	6.21863149516334e-17	9.32267754081189e-17	9.66113738517125e-17	1.11476449128449e-16	1.01313232176701e-16
2008201	13	9.09215810381957e-17	6.5835997996207e-17	7.537061465032e-17	1.00401716770947e-16	9.85352467763032e-17	8.45460483491105e-17	9.23119392297721e-17	8.48819757540296e-17	9.1234260707589e-17	8.6558208085689e-17	1.20249432003241e-16	7.12449664203352e-17	7.29912258142388e-17	6.65080444943805e-17	6.70428318149815e-17	8.98089053248066e-17	9.17186962915867e-17	1.00016378358165e-16	9.04154598775308e-17
2008201	14	9.22891888226984e-17	9.47647773520483e-17	7.22196815885592e-17	9.33391196758641e-17	1.05127662029353e-16	8.18111670533986e-17	8.47414371867208e-17	7.5263848248627e-17	9.16596369815105e-17	7.84430378546109e-17	1.19833986227185e-16	6.85183845959375e-17	7.21942465640381e-17	6.25332651348091e-17	7.84280392393623e-17	1.09565623720871e-16	9.14561852199245e-17	8.944248275352e-17	8.42168731807142e-17
2008201	15	8.90550288207447e-17	1.04304327158741e-16	7.02211778139375e-17	8.76193139393012e-17	9.8695210135877e-17	8.37468222535544e-17	6.43433830183485e-17	9.07155280558564e-17	1.01352309587037e-16	9.24959990789147e-17	1.20652160987122e-16	6.41493396335329e-17	7.03898907379038e-17	5.85504897996433e-17	8.35752206398738e-17	8.1613650616984e-17	9.41980536187889e-17	8.23093301477204e-17	8.81092224626393e-17
2008201	16	9.62512307651426e-17	1.04300521580348e-16	6.97955985270303e-17	9.85290527541069e-17	9.53031101583773e-17	8.61800557894715e-17	8.46232944956226e-17	8.22068436488951e-17	1.02346236474736e-16	9.40323995399128e-17	1.08131940041194e-16	5.96930977754612e-17	6.52580372447038e-17	6.02609611237873e-17	8.61812030556087e-17	7.25956350950883e-17	1.01810150649996e-16	9.98667302942375e-17	1.06447667711284e-16
2008201	17	9.52711437609404e-17	1.04680658551389e-16	6.8989987782194e-17	1.03410213700612e-16	8.64025511514816e-17	8.06807888022851e-17	9.73706858105046e-17	7.53189740500666e-17	1.04619524594731e-16	9.4778179624136e-17	9.59020386624998e-17	5.59187489830175e-17	6.16403603451649e-17	1.16341499712339e-16	8.75175979277657e-17	6.48743650029254e-17	1.03723533299082e-16	1.00189041296443e-16	1.06471754410575e-16
2008201	18	9.73115433040391e-17	1.04955067967954e-16	6.6744176476398e-17	9.01958252925612e-17	8.28027100798567e-17	7.69958042186036e-17	1.05323398377539e-16	8.6644295398336e-17	1.00231607085788e-16	9.44919732525759e-17	8.94352953557676e-17	5.36691791856764e-17	5.80444200307174e-17	1.17130377898774e-16	9.80410025303088e-17	1.17608902498122e-16	9.97439866353923e-17	1.08788318557129e-16	1.06468233868669e-16
2008201	19	1.07754051764892e-16	1.05507074862171e-16	6.74452283154487e-17	1.07905388801127e-16	1.05488155243105e-16	7.48572920308784e-17	1.03063952485625e-16	8.94533692645107e-17	9.57636249857692e-17	1.00681288673278e-16	8.51602267928759e-17	5.26987770854238e-17	4.78181520162536e-17	1.21547894442281e-16	1.02917720027471e-16	9.20128505257402e-17	9.21410854504265e-17	1.05922468004415e-16	1.02982440610433e-16
2008201	20	1.07539375361107e-16	1.051291430484e-16	6.77273227380098e-17	1.02259777639679e-16	1.05495221178891e-16	1.03465489240226e-16	1.07522006059776e-16	1.01746680076476e-16	9.00747978120293e-17	1.08056376994495e-16	8.18602998768976e-17	5.31692037172654e-17	5.23045569155793e-17	1.21055766799729e-16	9.66693448275737e-17	6.78880326573253e-17	8.16033587598545e-17	1.00714956169357e-16	1.06722515971381e-16
2008201	21	1.07425644253405e-16	1.05169807588739e-16	6.58826972378378e-17	9.56503634098057e-17	1.05537209688533e-16	1.07100246247418e-16	1.06681890340041e-16	1.06939252743936e-16	9.46135685333078e-17	9.81600708793833e-17	7.71040623333389e-17	5.45858572410923e-17	5.78465315353761e-17	1.05944502011136e-16	9.43116453476653e-17	6.31743284152317e-17	7.43512531975558e-17	9.07243666424304e-17	1.067022599265e-16
2008201	22	1.11229730956417e-16	1.05645876915356e-16	6.33904514685547e-17	1.08169255544304e-16	1.05545898959949e-16	1.06409641928443e-16	1.03358353888e-16	9.97370082899146e-17	8.64032471050827e-17	1.00503946653486e-16	7.15299906656045e-17	5.67143764043634e-17	4.95331543771041e-17	9.75365533100074e-17	9.47270896354168e-17	6.1039613229012e-17	8.61001646233333e-17	9.5042958526694e-17	1.06620330666328e-16
2008201	23	1.08805895426709e-16	1.05175949141984e-16	6.17823366755411e-17	1.07246216939752e-16	1.05525332105004e-16	1.06315377092521e-16	1.06620910558841e-16	9.36163074123094e-17	8.58998598893048e-17	1.07329725393794e-16	6.62351520637021e-17	5.68494107553032e-17	1.02545615045082e-16	1.21152611447281e-16	9.13964944590576e-17	6.32155067195193e-17	4.64731555315752e-17	8.36762486262122e-17	1.06435786987623e-16
2008202	0	1.05617601954236e-16	1.05151342212448e-16	6.14025166607062e-17	1.07394373728158e-16	1.05563289142517e-16	1.06238114703273e-16	1.06974761743843e-16	9.94910037559349e-17	9.0406485741857e-17	1.07963708779957e-16	6.19936654334787e-17	5.62429430417611e-17	6.8247249317477e-17	1.02178112845949e-16	8.38622751193583e-17	6.79749137561242e-17	4.21033503910368e-17	6.19209398046802e-17	1.06221798122033e-16
2008202	1	1.08101466125978e-16	1.04822418540478e-16	6.15887022565968e-17	1.0720857183754e-16	1.05699380927688e-16	1.05749245836959e-16	1.0724925477525e-16	1.06064639840682e-16	9.52525805845434e-17	1.08942677238652e-16	5.91142706328583e-17	5.63654129623969e-17	7.77523582751599e-17	9.26824072648521e-17	7.60322514611899e-17	1.11541357998351e-16	1.04038441785489e-16	6.10134564431231e-17	1.06428329383507e-16
2008202	2	9.9355541668447e-17	1.0477776925845e-16	6.14815884365969e-17	1.07564942486572e-16	1.01428948126699e-16	1.07391105754691e-16	1.07162540640995e-16	1.06593966387275e-16	9.43178356113448e-17	1.11055333003096e-16	5.74860582089023e-17	5.73406284937244e-17	9.08048346522441e-17	8.74968650703736e-17	7.11259129773897e-17	1.1003340317872e-16	1.06634318424805e-16	7.69313083350081e-17	1.07356703010124e-16
2008202	3	7.24248958632227e-17	1.05681047296524e-16	6.09231666483964e-17	1.0596824752977e-16	1.05784546419987e-16	1.06866323470041e-16	1.06765415253065e-16	1.07319583759302e-16	1.07256529563679e-16	1.11730248335106e-16	5.58677860618068e-17	5.8840039109802e-17	5.1627530245431e-17	1.13129930913591e-16	6.56263542159549e-17	1.08535977151274e-16	1.06550755616011e-16	8.13858947889161e-17	1.0702971996817e-16
2008202	4	8.88308192996149e-17	7.26096973065648e-17	6.03390108955311e-17	9.03642862262284e-17	1.05786969438669e-16	9.95060564971498e-17	1.06724318547222e-16	8.60482254418496e-17	1.08273558541929e-16	1.10830413969065e-16	5.45642147884317e-17	5.87646254952408e-17	8.29935540356428e-17	1.1426885831509e-16	6.23027770970791e-17	1.08275702873915e-16	1.06469644347135e-16	8.06275098322535e-17	1.06761745897603e-16
2008202	5	1.09498907091955e-16	6.29285940776449e-17	6.00522954053585e-17	9.33171547097311e-17	1.01830569924154e-16	1.06780546619868e-16	1.06417580540246e-16	4.27891617831703e-17	1.1031283389084e-16	1.091266567135e-16	5.36872571364781e-17	5.63980795488024e-17	6.29782500416892e-17	1.18356326437342e-16	6.07252357046535e-17	1.0845440301933e-16	1.03010066819121e-16	8.99183636987183e-17	1.06564344074213e-16
2008202	6	5.10546843395738e-17	9.70085077342348e-17	1.19933242844304e-16	1.05622535513552e-16	8.67804889846902e-17	9.06221097769725e-17	1.05993429837566e-16	1.09228199101444e-19	1.09767323741635e-16	1.08183889018103e-16	5.37517588307692e-17	4.23499886926094e-17	6.97528682600135e-17	1.16137147700621e-16	6.01841693021204e-17	1.08268977661721e-16	9.73535559975142e-17	1.07574686147345e-16	1.06643546514769e-16
2008202	7	1.08286952221618e-16	1.05182124634492e-16	1.20727668943525e-16	1.05786915378582e-19	7.05116074002444e-17	8.07437376996531e-17	1.05377211861431e-16	9.22631019723842e-17	1.08139959496696e-16	1.04016257904398e-16	5.62843752411122e-17	2.60186934753447e-17	6.91047285721028e-17	1.17557796484134e-16	6.73767840892949e-17	1.08615053983769e-16	1.05553599808676e-16	1.09765762940569e-16	1.06517602241576e-16
2008202	8	1.08067665553143e-16	1.05093739536923e-16	1.20572306925063e-16	8.11073507394881e-17	6.52960396543986e-17	7.70440821965043e-17	9.09871141765429e-17	1.07642032050829e-16	1.07761877582355e-16	8.49658276285924e-17	5.96873099333621e-17	1.35929246024467e-17	5.69957201273506e-17	1.23593380186097e-16	8.04933882630075e-17	1.08644553094657e-16	1.06027404572255e-16	1.08232158782344e-16	1.06125292441882e-16
2008202	9	1.08031271959693e-16	1.0492885625141e-16	1.19904167472138e-16	9.69369744185147e-17	1.07074149393947e-16	7.84911929073752e-17	5.64226977818355e-17	1.07823569716561e-16	1.07971328864569e-16	6.70295120338927e-17	6.27215640063633e-17	1.76743434739486e-17	6.86773338275436e-17	1.23356248191762e-16	9.88675417542278e-17	1.07875760535534e-16	1.06418504864966e-16	1.04060236570921e-16	1.0614875192614e-16
2008202	10	1.08095643362742e-16	1.01206375668005e-16	1.15468135532994e-16	9.42104802212019e-17	1.06993610264612e-16	7.76350487401023e-17	7.51823536487842e-17	1.07831423615557e-16	1.00089228388254e-16	4.93407129135145e-17	6.51824749039585e-17	1.80169194707921e-17	8.96950614005764e-17	1.23339760718719e-16	9.69132230333211e-17	1.00921908654771e-16	1.0609631174148e-16	1.02606161978619e-16	1.06219161615778e-16
2008202	11	1.08098752714413e-16	9.42932093456219e-17	1.04270280566247e-16	9.32890421374371e-17	1.0485632784671e-16	7.2814766427306e-17	1.00766512010378e-16	1.07745233383743e-16	8.0747052193087e-17	7.58803064038417e-17	6.73319603260302e-17	1.78591142345702e-17	1.03468985762987e-16	1.23284642843133e-16	9.13954502754225e-17	7.61474298689796e-17	8.97243922651818e-17	9.82207715477832e-17	1.00870958469728e-16
2008202	12	1.03245011414518e-16	8.59512380910771e-17	9.06169174514441e-17	8.58418771887177e-17	9.73785539465497e-17	6.7773892237046e-17	1.06698701235558e-16	1.07623388702413e-16	6.74532555701416e-17	7.7424064328719e-17	6.904044632726e-17	3.37770533721548e-17	1.07827437889113e-16	1.23920004045223e-16	8.4297644749266e-17	7.22147129645648e-17	8.6796873892698e-17	9.8970950458703e-17	1.06355909183345e-16
2008202	13	8.20566800051257e-17	8.91319505168758e-17	8.17546560984103e-17	7.95671673167003e-17	9.29673412359619e-17	6.36109671017105e-17	1.06489679859551e-16	1.07582471431142e-16	8.80368094951015e-17	8.40254279283999e-17	6.99047456341494e-17	6.5244748283138e-17	1.07764929720121e-16	1.24449991168472e-16	1.06286954482387e-16	8.41661482389948e-17	1.01341581709956e-16	9.94212008432257e-17	1.06260481559966e-16
2008202	14	3.71551900070264e-17	1.0029920376793e-16	7.70314148632813e-17	7.40618062852576e-17	9.40069759721172e-17	6.15940751129222e-17	1.0655999010234e-16	8.54410675374998e-17	1.08043261757638e-16	8.81785226339121e-17	7.0355364173343e-17	4.97864699604184e-17	1.08324759857176e-16	1.13763519911007e-16	1.06072576400178e-16	1.10548008935901e-16	9.61462954845292e-17	9.25123424077382e-17	9.23909599419662e-17
2008202	15	6.7047382288454e-17	7.52228792686348e-17	7.32751177988475e-17	1.06925250883926e-16	8.93480239490249e-17	6.15652805163455e-17	6.52594672989991e-17	5.84935616477372e-17	1.07712850668725e-16	8.82238942026492e-17	7.12213583299465e-17	1.80825164443728e-17	1.09024083338367e-16	1.17415453290762e-16	8.65221906283188e-17	9.80794083227905e-17	8.63834614748792e-17	8.99686243320649e-17	8.42412863665706e-17
2008202	16	1.09443141601253e-16	6.64801001257546e-17	7.10667288464267e-17	8.1080380862561e-17	8.15605502353436e-17	6.04554301561924e-17	5.86837530000958e-17	4.76521962605417e-17	1.07720791103918e-16	8.98063569409155e-17	7.46147184493626e-17	4.00597931149567e-17	1.09427004869019e-16	1.10299689831154e-16	1.06528557625122e-16	8.91296081102371e-17	8.01350074388808e-17	1.08021041571443e-16	7.07077145257724e-17
2008202	17	1.0935779628127e-16	6.28520287968984e-17	6.90422747641063e-17	6.9747141712021e-17	7.36748635873511e-17	6.66463448280158e-17	1.05961843042238e-16	4.99865399645798e-17	1.07690539858791e-16	9.71126434206302e-17	7.44775680486049e-17	6.10704466693707e-17	1.06813377933667e-16	1.16460112031485e-16	1.00309640417066e-16	7.55365595875852e-17	7.81673824241223e-17	1.07892722093568e-16	4.40422054229723e-17
2008202	18	1.09656923675553e-16	7.79474737833054e-17	6.58118332831153e-17	6.30819667867488e-17	6.92671323042755e-17	6.81276977703304e-17	1.06724384559862e-16	2.7233906045588e-17	1.07632703729019e-16	1.00807132382608e-16	7.22063946009468e-17	8.14223357348088e-17	1.02597356639803e-16	1.17956265371949e-16	9.30652267693218e-17	6.97299206510684e-17	7.91487852100125e-17	1.0785785757388e-16	3.39128281741977e-17
2008202	19	1.05750644547774e-16	8.82194782464508e-17	5.98490436776674e-17	1.06205065542739e-16	5.94490881689843e-17	5.79642202343625e-17	1.085485084317e-16	3.26151701570951e-17	1.07574981462095e-16	1.04769795985721e-16	6.74684708451756e-17	6.2752733732789e-18	1.02192099379148e-16	1.13721649613177e-16	1.07373424895475e-16	1.19122909068992e-16	8.04402754246928e-17	1.07680072337357e-16	3.4790601162046e-17
2008202	20	1.0973973546584e-16	7.88073900126921e-17	5.65561008070376e-17	1.06959118637455e-16	4.86290630311349e-17	5.34940478869466e-17	1.11031650297315e-16	3.69394462167045e-17	1.07367713530462e-16	1.0773104430715e-16	6.31816410657646e-17	6.25678493153861e-17	1.03848970296006e-16	1.08845064122782e-16	1.08455145251248e-16	9.41671584129143e-17	7.75534859777454e-17	1.07332266184246e-16	3.85203822696516e-17
2008202	21	1.09442027509803e-16	6.58685477703864e-17	5.63852421875576e-17	1.06242946193077e-16	3.68230129703396e-17	6.22831962255435e-17	7.84679767289789e-17	8.37305419257232e-17	7.4424475890969e-17	1.07405412537304e-16	6.96640996948427e-17	1.07553395337857e-19	1.12235512101288e-16	1.09273182977093e-16	1.09755514362941e-16	7.14239993714247e-17	7.51741171445312e-17	1.0648709037716e-16	4.51308388174788e-17
2008202	22	1.09398070435951e-16	5.36644946374109e-17	5.67811492210426e-17	8.05506243579192e-17	2.54954498334169e-17	6.52058660810183e-17	8.32078064481263e-17	7.476023816701e-17	1.07407251095433e-16	1.07640814489258e-16	8.4821740810975e-17	9.13056961443805e-17	1.11227814993823e-16	1.13570799824529e-16	9.89832150979126e-17	6.44104475033017e-17	7.6714866939024e-17	1.05842554061065e-16	4.89074561739717e-17
2008202	23	1.08637066317711e-16	4.35077736776916e-17	5.64164802178237e-17	6.95775317031141e-17	2.71671557613794e-17	5.99365171682973e-17	8.86531891194171e-17	4.77928683368274e-17	1.0426387037942e-16	1.07766418324286e-16	1.20173939697986e-16	1.23846650578924e-17	1.05985473051941e-16	1.21586985620319e-16	9.29285003131421e-17	6.09035907441947e-17	7.94654456724202e-17	1.05826545122072e-16	4.98670477932503e-17
2008203	0	8.68729243584105e-17	3.75062636431057e-17	1.17646697040834e-16	6.10808399204114e-17	2.62847225956954e-17	5.64673807374898e-17	9.05220280763293e-17	1.07710794639256e-16	1.03756116201231e-16	1.07396004482074e-16	1.18778150315233e-16	7.58151295186781e-18	9.92627540189313e-17	1.21147932164062e-16	8.62455494034357e-17	5.96180533133891e-17	9.05086183939216e-17	1.06744432122876e-16	4.73557384083084e-17
2008203	1	6.92592840068636e-17	3.42652404486193e-17	1.17447117292372e-16	5.35456291646121e-17	2.64771292185526e-17	5.52119016780481e-17	8.53640107198625e-17	5.71350092774493e-17	1.02400888989781e-16	1.07161362083436e-16	1.15439364709177e-16	1.00549742801768e-17	1.01437602223323e-16	1.21191810827512e-16	8.17099401410445e-17	5.97142812954854e-17	9.37893463761461e-17	1.07575950907015e-16	6.2845081570224e-17
2008203	2	9.47414820463121e-17	3.31760153225763e-17	1.19469486840036e-16	4.6676275970797e-17	2.91282088645201e-17	5.46495229127269e-17	8.15642238138303e-17	5.40017651626533e-17	9.83030217222542e-17	1.06737887799887e-16	1.129822692417e-16	7.80638538997604e-18	1.06272674800306e-16	1.21715688592396e-16	7.7248761413827e-17	6.03697326657327e-17	9.48283322865736e-17	1.08485626334711e-16	6.52830107342711e-17
2008203	3	1.07557904718451e-16	3.22302303748157e-17	9.17421152565328e-17	4.11430045228227e-17	2.90569969021071e-17	5.42759308198055e-17	8.16811146441747e-17	1.0738021091296e-16	9.12434761486058e-17	1.06633672176574e-16	1.13086362226258e-16	8.55662021627928e-18	1.05034837811845e-16	1.11987569013503e-16	7.76436606670094e-17	6.00121663483431e-17	9.50115576112425e-17	4.36577220071683e-17	6.09602509552591e-17
2008203	4	1.02695662793235e-16	3.13127542737832e-17	7.5665784175735e-17	3.72295538201136e-17	2.67626797404191e-17	5.35526177276568e-17	1.06986295301832e-16	9.14800494374809e-17	8.66669943722279e-17	1.06477303033113e-16	1.1667654080254e-16	1.04672983134274e-17	3.38533997865426e-17	8.49172427636997e-17	6.85771700967511e-17	6.01252146208693e-17	9.52771558586293e-17	3.24186361220355e-17	4.54587009666746e-17
2008203	5	1.07255768223652e-16	3.03142801643256e-17	6.81578295457444e-17	3.52729550294626e-17	2.12862888364457e-17	5.24174446094062e-17	1.0660826086724e-16	1.07520227546416e-16	8.95397387765566e-17	1.06164382635072e-16	1.19316771880305e-16	1.51462890025128e-17	9.61682882328283e-17	1.21978194186575e-16	4.93341210076647e-17	6.30259709524041e-17	9.3763146821823e-17	2.85352778422732e-17	3.14985758496532e-17
2008203	6	1.06716148878511e-16	2.53843295153805e-17	6.82841009658876e-17	3.36970155816528e-17	1.60002020020489e-17	5.05320528196597e-17	1.06332592778048e-16	1.01342498811918e-16	9.82774898236892e-17	1.06118905435704e-16	1.18247392832482e-16	2.08472698351228e-17	9.77017110887667e-17	1.22946122808335e-16	4.71749992831762e-17	1.20673185745848e-16	9.58153441031057e-17	2.66645319214786e-17	2.37540438979251e-17
2008203	7	1.06527395942048e-16	1.51344472916245e-17	1.13682564733087e-16	3.18483873756745e-17	1.44370172349927e-17	4.73745881428012e-17	1.03113686005799e-16	1.04857377480219e-16	1.00527365057049e-16	1.05974412617347e-16	1.16302139922422e-16	4.17934424595962e-17	1.03915651203061e-16	1.23091239767842e-16	5.14220050062439e-17	1.18193148654711e-16	8.77834710708025e-17	2.79202576972872e-17	1.72210258727805e-17
2008203	8	1.06319695667596e-16	6.91116627623878e-18	8.63091437532797e-17	2.88740327723673e-17	1.66980608373163e-17	4.28300669839766e-17	1.03222439856586e-16	1.03280180092277e-16	1.06992695777744e-16	1.05801813089369e-16	1.15471496751161e-16	5.49901849180362e-17	1.13635170886902e-16	1.18755954481856e-16	5.67855728768815e-17	1.12867991213241e-16	7.0186867531526e-17	1.05911825894784e-16	1.50342295798121e-17
2008203	9	1.06503969981696e-16	8.82078680186032e-18	7.22676865654741e-17	2.23792877045754e-17	2.02036515208318e-17	3.93624036039954e-17	1.02638062231314e-16	1.02938968889752e-16	1.06791159002296e-16	1.05506174314329e-16	1.15604187572026e-16	7.19815971244167e-17	1.14138425794986e-16	1.11110523907646e-16	5.66495244557068e-17	1.03341368621154e-16	5.70532876663814e-17	1.05861291836302e-16	1.83255751977292e-17
2008203	10	1.06247336075075e-16	1.94310471630949e-17	6.67787419440424e-17	1.4892102490945e-17	2.06195187628874e-17	3.69363331390713e-17	1.0573675393388e-16	1.05309181641536e-16	1.06906303312286e-16	1.05517159306095e-16	1.16253690449182e-16	1.07290747523257e-16	1.15399133186112e-16	1.08246151517405e-16	5.53183252422845e-17	8.10694254337097e-17	4.91437395185292e-17	1.06035932128427e-16	2.44658147026568e-17
2008203	11	1.0611318031547e-16	3.21945547978807e-17	6.39727087671411e-17	9.51725589753805e-18	2.04120417977052e-17	3.42078667966779e-17	1.05452733026465e-16	1.08903239471408e-16	1.0723212419866e-16	9.89349770473984e-17	1.1068381220877e-16	1.01685153800323e-16	1.1693432525214e-16	1.12329490400558e-16	5.62243684967359e-17	6.27564030073868e-17	4.40736435640299e-17	1.06165045823836e-16	2.84500264055718e-17
2008203	12	1.06036578380666e-16	5.90015236677307e-17	6.11734437406604e-17	8.40588297295912e-18	2.18873436479596e-17	2.40297322456169e-17	1.05335958524005e-16	1.09271573346262e-16	1.07534126323215e-16	8.58235318482532e-17	1.10262695946296e-16	9.43391480247449e-17	1.192760710029e-16	1.17665421655606e-16	5.45774033092562e-17	5.33855107040909e-17	4.01276996717921e-17	1.06379748007874e-16	2.65452456848946e-17
2008203	13	1.05982708788079e-16	7.00958356329347e-17	5.81931020907302e-17	1.03030237575279e-17	2.63372753367268e-17	1.07956081688465e-17	1.05383911941311e-16	1.09827765291045e-16	1.07872915786004e-16	7.73819877366068e-17	1.1111033612708e-16	9.02670806736191e-17	1.01722059283985e-16	1.16614974968743e-16	5.12594820274413e-17	4.69060298042218e-17	3.719610640621e-17	1.07977907444444e-16	1.08424447262026e-17
2008203	14	1.07220494573332e-16	1.0535382787155e-16	5.63990889534336e-17	1.8153649348006e-17	3.10220318375107e-17	1.16132690462876e-17	1.0525623555394e-16	1.10398578253419e-16	1.08201163568705e-16	7.19092287652381e-17	1.15038092342645e-16	8.95696553531718e-17	8.50064124241239e-17	1.20637530640851e-16	4.98171629460088e-17	4.14230507308108e-17	3.50909996760766e-17	1.05415418588173e-16	7.42859747207371e-18
2008203	15	1.06492275594429e-16	1.05318895256979e-16	5.54450246745111e-17	2.87769537985885e-17	3.41203677765564e-17	1.73892792173436e-17	1.05058103206526e-16	1.10985103868752e-16	1.08601129564422e-16	6.91760840981709e-17	1.1149080471098e-16	9.1720135534738e-17	7.74626036489492e-17	1.15615332850404e-16	5.25082215948483e-17	3.80139731472976e-17	3.33164964091136e-17	1.00788451658212e-16	1.63300806122031e-17
2008203	16	1.05811105299212e-16	1.05365117239596e-16	5.45251271404957e-17	3.50177863274694e-17	3.64859677700969e-17	1.58337693725682e-17	1.05061871113429e-16	1.10427023716156e-16	1.09155720263483e-16	6.86296801993041e-17	1.10832021741167e-16	1.08062224275196e-16	8.1096791932031e-17	1.17660656323583e-16	1.18753752543124e-16	3.53884122229155e-17	5.41975660650018e-17	9.6320808882297e-17	2.92693405142751e-17
2008203	17	1.06961209725299e-16	1.05131952282315e-16	5.33841424750373e-17	4.38285515795163e-17	3.89825766318852e-17	4.24786213032175e-18	1.05141907391383e-16	1.09531544800677e-16	1.09758039284267e-16	6.9276472122995e-17	1.15200213958018e-16	1.08036968113984e-16	1.14530398921862e-16	1.23011121185829e-16	1.12721196625432e-16	3.24422950350543e-17	6.39299574914742e-17	8.90951347945408e-17	3.29856108731773e-17
2008203	18	1.05908004311277e-16	7.44649448899372e-17	5.05755678053455e-17	5.27913135516047e-17	4.16648365523942e-17	4.38088732798454e-18	1.09351835960716e-16	1.08663191055338e-16	1.10238671117823e-16	1.06484389021252e-16	1.10528781863846e-16	1.0803054242137e-16	9.77637657789687e-17	1.2273135745385e-16	1.16904043219435e-16	2.89108074848635e-17	7.1006007756938e-17	1.14421142382839e-16	3.23907517977347e-17
2008203	19	1.06058525408397e-16	1.01870201197096e-16	4.70694517659468e-17	5.99924801727379e-17	4.22582332148432e-17	1.79628796028429e-17	1.00550986001331e-16	1.05045390292485e-16	1.10431788397815e-16	1.11108380723185e-16	1.03952231058132e-16	1.08228303533807e-16	8.70154463592618e-17	1.1944105789183e-16	1.1390962290698e-16	2.49951470961152e-17	6.40441348828555e-17	1.15386664698128e-16	3.23405392433373e-17
2008203	20	1.07120184010049e-16	9.07907494512071e-17	4.37164310579836e-17	6.63662945003611e-17	4.19187510233337e-17	1.05540159783604e-16	8.0256303784146e-17	1.07406771946341e-16	1.09925177014009e-16	1.03929891707627e-16	9.86241317827475e-17	1.08290339188431e-16	8.25788703174798e-17	1.16242928903376e-16	1.02343988908517e-16	2.03560746178111e-17	5.07963037491099e-17	1.18505833867726e-16	3.2615340108013e-17
2008203	21	1.12089157743697e-16	9.01590295210233e-17	4.07571735720509e-17	6.98276966385542e-17	4.03817921288031e-17	6.76688792291419e-17	7.27279165116477e-17	1.06944555956532e-16	1.09669057815622e-16	9.08599150857523e-17	9.46648457211618e-17	1.07934150505849e-16	8.08781598339354e-17	7.33395039524131e-17	9.84740787647013e-17	1.49771413312752e-17	4.05210437194738e-17	1.19323693806323e-16	3.26667225656073e-17
2008203	22	1.16454207706894e-16	1.05641339118099e-16	3.88511998396047e-17	6.64799803199813e-17	4.42311174323628e-17	5.13652618749253e-17	6.86350402049938e-17	1.07200271326335e-16	1.11123048895412e-16	8.59545724897377e-17	1.02150066537763e-16	1.07792154603438e-16	7.78708705720306e-17	7.03706149185626e-17	9.23700233551061e-17	1.04185541982018e-17	3.3317132724241e-17	1.19157791498395e-16	3.24483094392051e-17
2008203	23	1.16975824822599e-16	1.05715029517977e-16	3.7330177868838e-17	6.33950254577015e-17	5.32375352651775e-17	2.62275928583933e-17	6.65590220638114e-17	1.07346713643437e-16	1.12732843135418e-16	1.04263490040382e-16	1.14237465758499e-16	1.07724957490981e-16	7.59082777897391e-17	7.49980524810885e-17	8.6684025264097e-17	7.181110155523e-18	2.85053555576166e-17	1.19152814199373e-16	3.17599875004905e-17
2008204	0	1.16951904830423e-16	1.06048114978176e-16	3.62608744966653e-17	6.10650887632194e-17	1.11781594186763e-16	2.90266669477198e-18	6.66670184379441e-17	1.07508358357049e-16	1.14728458641186e-16	1.10902902185689e-16	1.2079546690299e-16	1.08089621874573e-16	7.68691679468574e-17	8.1126603767693e-17	8.20980748557452e-17	5.19557727703662e-18	2.53819923619052e-17	1.19361405352546e-16	3.12099734174945e-17
2008204	1	1.17407147247764e-16	1.06245255749311e-16	3.53730588318451e-17	6.02359330967556e-17	1.11904909062789e-16	1.46842772528895e-17	6.68123120220188e-17	1.07737597753792e-16	1.16730947875532e-16	7.68220060732349e-17	1.20542368181992e-16	1.0859420874861e-16	8.18107829440903e-17	7.94025341113961e-17	7.70594217149877e-17	4.54430338417474e-18	2.33896107437778e-17	1.1946419837093e-16	3.04665635651674e-17
2008204	2	1.18082427607612e-16	1.06884380192906e-16	3.40394076050654e-17	5.88713179061214e-17	1.12126654389549e-16	4.70600362932905e-17	6.87561761229946e-17	9.48763277443374e-17	1.18287438024868e-16	5.93767834559178e-17	1.21174349808504e-16	1.0960274458436e-16	8.04742527171511e-17	7.56686166414462e-17	7.19876214125467e-17	4.9561859045042e-18	2.20580076045265e-17	1.19533902234847e-16	3.03711010648313e-17
2008204	3	7.15600521206041e-17	1.06952324593071e-16	3.29103096957778e-17	5.61151043784837e-17	1.12278164058615e-16	1.0740299106613e-16	7.06112584722401e-17	9.28970311011066e-17	1.19258136625844e-16	5.66246048613427e-17	1.2237592580866e-16	1.1081138058255e-16	7.89548863237555e-17	7.2484439941569e-17	6.78402934858261e-17	5.87210621536523e-18	2.10040851319929e-17	1.19064270698127e-16	3.01785705466632e-17
2008204	4	5.75426664485018e-17	1.06654242066959e-16	3.21410260946303e-17	5.30384169124212e-17	1.12388186251567e-16	1.07598440900045e-16	6.98936231667475e-17	9.12735269167534e-17	1.19753581039905e-16	5.77403511794362e-17	1.17345362304763e-16	1.11118523074095e-16	7.98803778303219e-17	6.87295529323588e-17	6.36890522714628e-17	6.44417481503023e-18	2.0109520354307e-17	1.15004580430064e-16	2.76389229277602e-17
2008204	5	5.69755396758667e-17	1.06285614611839e-16	3.13052605271348e-17	5.22384365567263e-17	1.12669145287991e-16	1.07712451788132e-16	6.35680159643961e-17	9.04107376506397e-17	1.20053421515076e-16	6.11701153127452e-17	1.13970414180508e-16	1.11885354988224e-16	7.81034530641981e-17	7.14147003930222e-17	6.51651870379299e-17	6.43921784487805e-18	1.93870331595183e-17	1.18508279846059e-16	2.39322138917311e-17
2008204	6	5.988041905981e-17	1.06988897196616e-16	3.00377134414778e-17	5.16357421384244e-17	1.12868676617121e-16	1.08187036676419e-16	5.38718414172143e-17	8.89368392718126e-17	1.20406949327436e-16	6.55801006732647e-17	1.11656674419033e-16	1.12396936772401e-16	8.07699749415298e-17	6.78499968205962e-17	6.14535930452808e-17	5.6429363289762e-18	1.90091407219907e-17	1.18129961348437e-16	2.11154296579794e-17
2008204	7	6.40245526814127e-17	1.09573967799551e-16	2.93151604615394e-17	1.14730572719488e-16	1.12798314674313e-16	1.04454794264849e-16	5.21630201105187e-17	8.4487888103545e-17	1.20629069519179e-16	7.3147726719287e-17	1.02409639823199e-16	1.12007489573033e-16	1.18976563719285e-16	6.65900846163598e-17	6.67435818055622e-17	4.73603879103422e-18	2.53933855051771e-17	1.12955908761152e-16	4.4920938269084e-17
2008204	8	7.08949239680274e-17	1.13854272081806e-16	2.86748302513494e-17	1.11773309652786e-16	1.13036769837835e-16	1.05924534884718e-16	5.45611809175633e-17	8.04570421025104e-17	1.20973153046512e-16	8.12896582804952e-17	8.25149047960578e-17	1.10717743844149e-16	1.20641314447194e-16	6.87937552525288e-17	6.8941470788223e-17	4.28299989620376e-18	3.59092013995842e-17	1.17819582267448e-16	1.06627423477835e-16
2008204	9	7.22216009614417e-17	1.1616930676376e-16	2.84120402125274e-17	1.04568765069507e-16	1.13546036155222e-16	1.03972668515456e-16	5.66742076859563e-17	7.32208795131099e-17	1.20914102442804e-16	1.06439681724501e-16	8.83806657378052e-17	1.10366531710185e-16	1.22266752951004e-16	1.23422277014995e-16	6.70783881487472e-17	4.66434704265668e-18	4.158420638905e-17	1.18151770600286e-16	7.03426095189274e-17
2008204	10	7.94588483173355e-17	1.14420679411406e-16	2.89173966565021e-17	9.22756059701026e-17	9.76527431240054e-17	1.00876053897911e-16	6.11629515334169e-17	6.53255817150672e-17	1.20678469165629e-16	1.07761967762376e-16	1.01128490325226e-16	9.96857800897231e-17	1.23025341458648e-16	1.15839095376586e-16	6.58661180811679e-17	6.09658687008887e-18	4.4892432355813e-17	1.18834403875253e-16	5.15449328135175e-17
2008204	11	1.08074293947166e-16	1.02058290985578e-16	3.37522981399652e-17	8.66323733700431e-17	8.75243071415055e-17	9.94726898541052e-17	1.05936490440932e-16	5.86547136176357e-17	1.17803322843227e-16	8.2204994610088e-17	1.1246539146184e-16	9.14537603833793e-17	1.23143154815273e-16	1.0735835261149e-16	6.4512167729212e-17	6.00880820834464e-18	4.64404259650792e-17	1.18859952890623e-16	5.48984197272612e-17
2008204	12	1.08832432515534e-16	8.12408861456663e-17	3.37163657135031e-17	8.24714890810979e-17	8.06152670000569e-17	1.01581809035367e-16	1.06004040587274e-16	5.50913395886987e-17	1.14602101937567e-16	6.96146523162028e-17	1.10454172572756e-16	8.61615713602534e-17	1.23770364929574e-16	1.00913088964739e-16	6.37625890316999e-17	6.07663483847435e-18	4.78507172371388e-17	1.18593109374425e-16	6.48094516571559e-17
2008204	13	1.09107024021445e-16	6.83397444904333e-17	3.59275834783194e-17	7.9786858204257e-17	7.48991893575348e-17	1.07043284243427e-16	8.72836483125356e-17	5.4430583144929e-17	1.13294531188849e-16	5.91596274186886e-17	1.0913213935076e-16	9.46625071980566e-17	9.97202921879321e-17	8.86615004514107e-17	6.35888528918127e-17	8.93755406333141e-18	4.976374702968e-17	1.17371745555255e-16	7.43661370775426e-17
2008204	14	1.09623090899749e-16	6.63926453470236e-17	3.7574377273722e-17	7.54243937435069e-17	6.9478977398428e-17	1.06866980399393e-16	6.15840448511799e-17	5.5322010776271e-17	1.11721581088073e-16	5.81820995338552e-17	1.08205062959272e-16	1.00927722010209e-16	6.66796885921754e-17	7.33553701161775e-17	6.4221525399648e-17	1.09159216797494e-16	5.18855481211283e-17	1.15382311247092e-16	6.08042978488696e-17
2008204	15	1.09787169522672e-16	5.10801035055873e-17	3.74497873108583e-17	7.12246062714005e-17	6.35980911071794e-17	9.7817441110349e-17	4.73431832946253e-17	5.6686724790963e-17	1.10579252540231e-16	6.86241352185595e-17	1.1032447578279e-16	9.94299681126719e-17	1.21608056598932e-16	5.93751137161441e-17	1.21813261765674e-16	1.08773949884491e-16	5.40291193507203e-17	1.15003639403134e-16	4.15913787157394e-17
2008204	16	1.09517268402742e-16	4.48315454431955e-17	3.57547024491409e-17	6.80384787578136e-17	5.7658665849866e-17	7.85696040253854e-17	3.8435045532113e-17	5.75981241173604e-17	1.10144417617393e-16	6.09515511016725e-17	1.11387892598243e-16	8.56176389277777e-17	8.95217089703284e-17	4.93000975504146e-17	1.308162449394e-16	1.08535063570483e-16	5.57676318397996e-17	1.14178816484442e-16	3.06524706389494e-17
2008204	17	6.79268373408879e-17	4.3341242669739e-17	3.33975920543336e-17	6.65469511356141e-17	7.67214271636694e-17	6.90797426524171e-17	3.52667407901729e-17	5.88810336574132e-17	1.10275481711947e-16	5.29966121212286e-17	1.13846347053395e-16	8.99796718460193e-17	3.64662208569524e-17	1.20120085353934e-16	1.31988038866874e-16	1.11081009741255e-16	5.70532226983741e-17	1.12732938604223e-16	2.60993030744413e-17
2008204	18	3.59918252384634e-17	4.42309223456601e-17	3.15591195554349e-17	6.13198421436159e-17	8.46006956341594e-17	8.95746263566641e-17	6.07547601602717e-17	6.04079515511201e-17	1.10053839842754e-16	1.81153194463218e-17	1.13291539271809e-16	1.07433840878796e-16	1.90152322647894e-17	1.06366189895138e-16	1.27395293924557e-16	1.19757312828652e-16	5.84153539090156e-17	1.12348548653455e-16	2.39594623784822e-17
2008204	19	2.15828281671775e-17	6.37281718984985e-17	3.03286027004011e-17	5.76302351688378e-17	1.10207611227223e-16	6.97406388812528e-17	1.05788270322766e-16	6.15400095451706e-17	1.10104971876695e-16	1.17731703904932e-17	1.1237858105485e-16	1.08390518378824e-16	1.3009800043836e-17	9.47719009256324e-17	1.18463975905873e-16	8.30126405065867e-17	5.92836646451024e-17	1.11614337379797e-16	2.26744104772866e-17
2008204	20	1.50422777585573e-17	6.60621471413737e-17	2.91100218892109e-17	5.44463477387095e-17	1.10456543692078e-16	6.21720786857373e-17	4.17797140325207e-17	1.07989201205425e-16	1.07780113294907e-16	1.00159100998776e-17	1.10388460211808e-16	1.09351988257382e-16	1.06705237991703e-17	8.58873649511029e-17	1.11105969658072e-16	7.49387129545338e-17	6.03174111076598e-17	1.10861248874216e-16	2.17512751311575e-17
2008204	21	1.17737606078146e-17	6.62301239504371e-17	2.84158743997334e-17	5.03003288739085e-17	1.11151463729709e-16	6.19354932418608e-17	1.7371684802002e-17	1.0692840668297e-16	1.08398449904605e-16	9.04314020007488e-18	1.10224478775226e-16	1.08802180063152e-16	9.60936085459831e-18	8.21274027251982e-17	1.04494104732361e-16	1.20217006285143e-16	6.1393565608684e-17	1.09852390513521e-16	2.12087484189159e-17
2008204	22	9.96407272059333e-18	6.59167952458544e-17	2.79376252764186e-17	4.70746220313077e-17	1.14156187131684e-16	5.83060889545494e-17	1.10568736604106e-17	1.07402702180989e-16	1.09221726878859e-16	8.21384177768956e-18	1.10323776779423e-16	1.08600475128819e-16	9.04871981213967e-18	7.86845832967269e-17	9.76606312618551e-17	9.28009142159272e-17	6.22584640702713e-17	1.08790803740447e-16	2.06330622188286e-17
2008204	23	8.84714190365201e-18	6.68477045761406e-17	2.74088379775825e-17	4.61201362865822e-17	1.02306716230758e-16	5.32547286099355e-17	9.05567319705055e-18	1.07976361793582e-16	1.07944735760629e-16	7.3566199910292e-18	1.10822617649154e-16	1.06708224882211e-16	8.71566296018895e-18	7.45630226279045e-17	9.15722678016958e-17	1.18974062237728e-16	6.19900002429909e-17	1.08583750284067e-16	1.9999069372322e-17
2008205	0	8.08707004976219e-18	6.60939112785819e-17	2.70559687164163e-17	4.57397106035209e-17	1.12162939947176e-16	5.0275805195456e-17	8.06276827426443e-18	1.08452493531306e-16	1.08170500277487e-16	6.47033244547839e-18	1.16215501395764e-16	1.071217707462e-16	8.54480170862559e-18	6.93791118245683e-17	8.70161153249485e-17	1.2015218139484e-16	6.11426352933576e-17	1.08676002647536e-16	1.9329599273644e-17
2008205	1	7.44553841842904e-18	6.48844851357714e-17	2.68140475286688e-17	4.57687679563559e-17	1.12803062454815e-16	4.8729948717771e-17	7.22884204086018e-18	1.09486462002772e-16	1.08556772808065e-16	5.53184209400531e-18	9.10552855113381e-17	1.08406284852123e-16	8.3697011540801e-18	6.32775360111478e-17	8.20125474060945e-17	1.21439672598714e-16	6.02192260722967e-17	8.13906293939759e-17	1.8626130404376e-17
2008205	2	6.83955314803792e-18	6.34691901955355e-17	2.66410986147455e-17	4.66325309714793e-17	1.13103193614744e-16	4.82940783225668e-17	6.37372413225185e-18	1.10994863633762e-16	5.04238244705536e-17	4.63254383786388e-18	6.47405300287222e-17	1.09360360625188e-16	8.11472963924193e-18	5.63841689753322e-17	7.51253349027483e-17	1.21883888559405e-16	5.96523535788913e-17	3.77501294561234e-17	1.78946624972102e-17
2008205	3	6.11632153194984e-18	6.11961220063418e-17	2.64862054236473e-17	4.84433986437442e-17	1.12723109440659e-16	4.88457235570928e-17	5.4839178792339e-18	1.14280356640692e-16	2.12241648941045e-17	3.84792121567964e-18	5.38544667112557e-17	1.0937756851362e-16	7.88724916144375e-18	4.89451652951633e-17	6.86078809166792e-17	1.21414591878755e-16	6.02959454417702e-17	1.97299821676007e-17	1.71456960146104e-17
2008205	4	5.27453337555389e-18	5.67728426703991e-17	2.62969381530818e-17	4.98155782201574e-17	1.12889304479047e-16	4.99743574451619e-17	4.66569573498612e-18	1.1611766555146e-16	1.18136690094083e-17	3.19153281279931e-18	1.14395398048676e-16	1.09837829940429e-16	7.65626278368796e-18	4.1381588385408e-17	6.29031629283582e-17	1.20869448433253e-16	6.12666872201007e-17	1.20393837974608e-17	1.63700361280988e-17
2008205	5	4.36587750613943e-18	5.11041392677251e-17	2.60559541323947e-17	5.24077847337262e-17	1.12518106813872e-16	5.15487787363155e-17	3.93656465452377e-18	9.34778291824463e-17	8.12793375274858e-18	2.63853553403681e-18	1.15367996139805e-16	7.63931777857245e-17	7.39062086157266e-18	3.31555602022569e-17	5.81812601580867e-17	1.20117795460443e-16	6.22910183018102e-17	8.47345194412533e-18	1.55153430937805e-17
2008205	6	3.57754224801297e-18	4.46916244806125e-17	3.04659458710231e-17	6.88245128465727e-17	1.12115670597105e-16	5.31177786352203e-17	3.32504372185557e-18	6.2226077486403e-17	6.24109892826006e-18	2.23422041777069e-18	1.16030280448786e-16	5.97840321501658e-17	7.15493483673251e-18	2.16625143023934e-17	5.53811045842596e-17	1.15946417410319e-16	6.4645969712582e-17	6.70741209269552e-18	1.45345395615601e-17
2008205	7	2.95811173710587e-18	1.21035142550766e-16	4.56582762755332e-17	1.18813042329938e-16	1.1189141212311e-16	5.45338462941052e-17	2.80917090985546e-18	4.38951512386333e-17	5.14142378861277e-18	1.9394301590934e-18	1.14985436701798e-16	1.09164130316864e-16	6.95679223276802e-18	1.87125602090356e-17	5.58421219406137e-17	1.12348954075705e-16	6.84862608350555e-17	5.69955502660808e-18	1.31612960671989e-17
2008205	8	2.46676520579314e-18	1.21132214275718e-16	1.21951534158092e-16	1.19929763807105e-16	1.12012467659513e-16	5.59369130571068e-17	2.41282537619209e-18	3.19171172793383e-17	4.43521581444368e-18	1.73357341898763e-18	1.13366840824888e-16	1.12435556360804e-16	8.20076144420608e-18	1.21264607122601e-16	5.56170980725623e-17	1.12337660473708e-16	7.60480500471481e-17	5.06654409191923e-18	1.13144695900995e-17
2008205	9	2.08234496061995e-18	1.21281024801507e-16	8.72461240686683e-17	1.12065706867119e-16	1.12175085179624e-16	1.20492471952848e-16	2.1294526869178e-18	2.43331922594852e-17	3.93593571951541e-18	1.58935609277294e-18	1.11114071905252e-16	1.13672256855366e-16	1.3512549020257e-17	1.21457553704277e-16	5.4101730904468e-17	9.23391722330136e-17	8.58981629389862e-17	4.62405306661259e-18	1.18405568793143e-16
2008205	10	1.80536835305742e-18	1.22345440891873e-16	6.14794747516083e-17	1.05212961598593e-16	1.12484056647684e-16	1.21014084974981e-16	1.92005261444864e-18	1.88160157024842e-17	3.58096908469173e-18	1.46561947292478e-18	7.91518028019263e-17	1.13849766407262e-16	1.76840015689584e-17	1.24223149850039e-16	5.22598746195751e-17	6.9514764936422e-17	9.74687254677803e-17	4.28409350880367e-18	1.17895234567741e-16
2008205	11	1.58408440341411e-18	1.15693921194801e-16	5.37399468118806e-17	1.00242234874457e-16	1.13656568359325e-16	1.11673433093344e-16	1.75145858225129e-18	1.471674664125e-17	3.30158817000536e-18	1.39517848399474e-18	5.63884026993212e-17	9.29325833137257e-17	3.69483007237768e-17	1.13098559494691e-16	5.0263773909548e-17	5.6794603200795e-17	1.00708154335198e-16	3.98090766418285e-18	1.16957777720732e-16
2008205	12	1.41438617260317e-18	1.09781448960437e-16	5.13121907971103e-17	9.63131872645507e-17	1.15335799922119e-16	1.00347447412025e-16	1.61259477156569e-18	1.16774810982541e-17	3.07269692062183e-18	1.34584562786558e-18	4.01690781997962e-17	8.53819844608774e-17	5.4775545181892e-17	9.94252028516058e-17	4.74199286150257e-17	4.94930425205071e-17	9.8047154760381e-17	3.7244521311728e-18	1.15440247337849e-16
2008205	13	1.26085014313765e-18	1.04213721934481e-16	5.16215686010032e-17	9.18500034824896e-17	1.11593726149992e-16	8.87839997500612e-17	1.52095625647082e-18	9.31293647521741e-18	2.88188822072185e-18	1.32024235383329e-18	2.9440618653097e-17	8.05988370199808e-17	6.24400786158191e-17	8.94419671925585e-17	4.46948587225239e-17	4.41124682885822e-17	9.30612914440308e-17	3.50357149098648e-18	1.13353690444731e-16
2008205	14	1.1363367201665e-18	9.99162412183502e-17	5.09250141961518e-17	8.64948130233162e-17	1.03422455254467e-16	7.89093908357434e-17	1.4357518178658e-18	7.49386603995388e-18	2.71515314543682e-18	1.32118511249139e-18	3.32193525728718e-17	1.08561521815858e-16	6.63789610698883e-17	8.1941090072557e-17	4.25494246002709e-17	4.20836964284942e-17	1.20101451504243e-16	3.27955330467812e-18	8.83252733814446e-17
2008205	15	1.03191335151464e-18	9.59330591050969e-17	5.04264304444321e-17	7.92795618842878e-17	9.84862189850616e-17	7.10024808223579e-17	1.38316088970833e-18	6.28465661674404e-18	2.56444582797548e-18	1.34904410626416e-18	3.4437040915299e-17	1.10091672715873e-16	6.67620620930204e-17	7.62791239276142e-17	4.08601588663365e-17	4.09429908926029e-17	1.19425598302138e-16	3.07532431946414e-18	7.38985303354311e-17
2008205	16	9.44767842618904e-19	9.13081559108237e-17	5.00930288190453e-17	7.19583760843585e-17	9.34360493176435e-17	6.77405125114661e-17	1.36365553129749e-18	5.45212308301366e-18	2.43465404889585e-18	1.40270055023668e-18	3.89164176080103e-17	1.12849386583823e-16	1.22898360555047e-16	7.17393324088851e-17	3.99540374900129e-17	3.95832934612145e-17	1.19366962883278e-16	2.89626626738104e-18	6.27073952270487e-17
2008205	17	8.77913364644952e-19	8.59800845099006e-17	4.87591516877157e-17	6.65391689493287e-17	8.66365357877653e-17	6.93481420158749e-17	1.36819364905672e-18	4.81869209150569e-18	2.33654350024038e-18	1.4656379521223e-18	7.01423388981176e-17	1.17149959206152e-16	1.19813160927634e-16	6.73749771591773e-17	3.92008109000026e-17	3.66860025720369e-17	1.19233776913906e-16	2.73802612113597e-18	5.30770552959033e-17
2008205	18	8.35579581932464e-19	8.04927625081864e-17	4.75218256526734e-17	6.17858882263002e-17	7.46659044206045e-17	6.74617640569633e-17	1.38066652023108e-18	4.30597869635614e-18	2.25477577340597e-18	1.53006318678438e-18	4.41121773777451e-17	1.1934751931764e-16	1.00282949605989e-16	6.2397272734256e-17	3.92133223638266e-17	3.47393919464854e-17	1.19611914703421e-16	2.61584586258903e-18	4.6799806112711e-17
2008205	19	8.12076245113749e-19	7.82287655364471e-17	4.66552810330353e-17	5.98282008121146e-17	6.57555486722349e-17	6.33134641076012e-17	1.35590761620856e-18	3.80111070929691e-18	2.18362083987521e-18	1.48068844676575e-18	2.45274779635845e-17	9.81010193053791e-17	8.84409886752811e-17	5.66692501190116e-17	4.01072853387214e-17	3.39982059094017e-17	1.20489221878722e-16	2.56231762004154e-18	4.08936155588456e-17
2008205	20	7.97574880808038e-19	8.61368663208149e-17	4.79633106957134e-17	5.85096680657314e-17	1.16314165201687e-16	6.19251800188237e-17	1.31458996642751e-18	3.30766109186598e-18	2.11444006560961e-18	1.4194162237078e-18	1.49059047227803e-17	8.52966746317784e-17	8.05649187109719e-17	5.25144834890647e-17	4.17912027286232e-17	3.58776567954488e-17	1.2079460430228e-16	2.58020257909429e-18	3.59989992823047e-17
2008205	21	7.85355805678836e-19	8.58064703477908e-17	5.41204893532137e-17	5.75704513287291e-17	1.12406888279756e-16	6.07459549458716e-17	1.28672295610638e-18	2.87172089138326e-18	2.05764962343459e-18	1.3723284679076e-18	1.05427936998977e-17	7.81478284884827e-17	7.4408807050226e-17	4.91717429095294e-17	4.28715147553161e-17	3.77120042298364e-17	1.21333657901806e-16	2.69566797041676e-18	3.15631302616508e-17
2008205	22	7.75182833184775e-19	7.56578488464623e-17	6.28776799616274e-17	5.88477085789825e-17	1.11714251840448e-16	5.78047983715289e-17	1.27436711499171e-18	2.59938461769527e-18	2.01786699280162e-18	1.33107426129131e-18	8.13588873202353e-18	7.30939673620548e-17	6.96545648904356e-17	4.66745508574392e-17	4.28490593378092e-17	3.7005511650443e-17	1.21598328396536e-16	2.94464588689744e-18	2.92019548324041e-17
2008205	23	7.6756663984958e-19	6.76408804696202e-17	7.12525994968266e-17	6.11568746911546e-17	1.12604679643531e-16	5.31516101375586e-17	1.27789189090046e-18	2.5587638755072e-18	2.09539706138935e-18	1.29416406363847e-18	6.39949479260725e-18	7.05917082776125e-17	6.65662299738892e-17	4.5399071272687e-17	4.40726609009437e-17	3.61471196822823e-17	1.22156896762343e-16	3.39547189238337e-18	3.11734353810345e-17
2008206	0	7.65865989754998e-19	6.47495417253078e-17	7.60155820392749e-17	6.62970255066553e-17	1.13221659499046e-16	5.03549123783327e-17	1.27859308661253e-18	3.09423969602742e-18	3.00582700732655e-18	1.26767652303346e-18	5.23072636468437e-18	7.18647737500903e-17	6.41762741909277e-17	4.52643385810515e-17	4.4445862262532e-17	3.60348903469707e-17	1.22865105268514e-16	4.72961911870231e-18	3.21436049513235e-17
2008206	1	7.7928813950922e-19	6.33211789888583e-17	7.88501160142357e-17	7.05940059672441e-17	1.14643945850344e-16	4.8805338011742e-17	1.28984560956069e-18	4.19909179676334e-18	6.33266019888734e-18	1.2458792017721e-18	4.40438224729558e-18	7.28601525334809e-17	6.1592617552627e-17	4.58907490084336e-17	4.35830694300774e-17	3.6786148560021e-17	1.22844628419682e-16	8.62777319031194e-18	3.54036958208278e-17
2008206	2	8.9575168374807e-19	6.19377710742321e-17	8.14975508714491e-17	6.96793805698864e-17	1.17523592719656e-16	4.82993613702683e-17	1.31439730921803e-18	5.14233651977088e-18	1.09524077059192e-17	1.23030673091802e-18	3.66965569716468e-18	1.18948391082752e-16	5.92214279184511e-17	4.70499906110393e-17	4.23252553682681e-17	3.82081457275758e-17	1.08684461648573e-16	1.50737579067515e-17	4.14553547589247e-17
2008206	3	1.07083785068526e-18	6.13224896374184e-17	8.01600063956082e-17	6.91570772248487e-17	1.1872314079801e-16	4.91479756280404e-17	1.34935796523859e-18	5.70379142389012e-18	1.69064261451553e-17	1.2222461450527e-18	3.16564424174568e-18	1.18859366675926e-16	5.77875953733536e-17	4.83892537166767e-17	4.37132561154935e-17	4.00881469357593e-17	9.60758066888089e-17	2.47611446735489e-17	1.17223142368054e-16
2008206	4	1.31661981614343e-18	6.10757058439133e-17	7.85032211888151e-17	6.87075365992122e-17	1.19515756325776e-16	5.13402798173784e-17	1.3813448653211e-18	6.83975046818264e-18	2.87323935102778e-17	1.22016062673372e-18	2.89417769202661e-18	1.18698001648964e-16	5.74851860696584e-17	4.93594001473668e-17	4.73937827342152e-17	4.21148233180451e-17	8.30983373551767e-17	3.74272502259407e-17	1.1677606422435e-16
2008206	5	1.56063684058309e-18	6.31325652497027e-17	7.82445425035531e-17	8.23989745422788e-17	1.19084381720921e-16	5.58652847865322e-17	1.40818728889307e-18	8.30132145866865e-18	3.96336599399357e-17	1.22637735012588e-18	2.85353949112109e-18	1.19528017396695e-16	6.14917539387888e-17	4.90587887973881e-17	5.18221472716216e-17	4.3273868618645e-17	7.36733548995799e-17	5.03845180874105e-17	8.67992200590978e-17
2008206	6	1.63110897752425e-18	7.81267299569328e-17	7.89595192279462e-17	7.91481066985032e-17	1.18908257463024e-16	5.82551741872489e-17	1.76987746762515e-18	1.40451866952921e-17	4.98513643963804e-17	1.39737988106829e-18	6.31795664488404e-18	1.20581267353727e-16	6.54371588417538e-17	5.61189720813483e-17	5.11010098084185e-17	4.37073911868745e-17	6.7741564790361e-17	5.90800414073707e-17	7.2772310626776e-17
2008206	7	1.68330185865402e-18	1.22241954819344e-16	7.2110151831825e-17	7.20660130093401e-17	1.1867523015645e-16	5.74558574958591e-17	6.25130906857822e-18	2.38525491101173e-17	5.94064142866174e-17	1.45267808200171e-18	3.80877044609562e-17	1.21258661890033e-16	7.17975892424555e-17	1.20878942015499e-16	1.0968609598153e-16	4.36088885353409e-17	6.92911877186593e-17	6.37691231375797e-17	1.22090806630176e-16
2008206	8	2.23551908078261e-18	1.22429438169103e-16	5.77962543451891e-17	7.20661397798024e-17	1.18852135367205e-16	5.39312007163259e-17	2.93985966188046e-17	3.81001892626602e-17	6.50364066677079e-17	2.35530152264687e-18	3.74512693161024e-17	1.00258854856362e-16	7.26303678363281e-17	1.21560681077863e-16	7.35960879326939e-17	4.41639922105843e-17	6.95362678968634e-17	7.85310515018375e-17	1.21772088522037e-16
2008206	9	3.89343049637376e-18	1.09478562518537e-16	4.91948583756752e-17	6.99296209309646e-17	1.19854102241992e-16	5.34302722827789e-17	1.14660874677405e-16	6.89034006740866e-17	7.62160947050804e-17	5.98140339519355e-18	2.71263988377499e-17	7.77532777257817e-17	7.76432255814033e-17	1.23702899536888e-16	6.26505140098564e-17	4.40707364453333e-17	6.88123365493229e-17	9.33623815300413e-17	1.21607117888445e-16
2008206	10	8.29162918039735e-18	8.94243418927769e-17	4.32298454744547e-17	6.66063397674164e-17	1.08970322005388e-16	5.32472205632203e-17	1.02160730659769e-16	1.21798978464429e-16	8.57332717872894e-17	1.72790150725581e-17	1.99502986986732e-17	5.96891015060282e-17	1.18182805103556e-16	1.1645443164186e-16	7.56771581912504e-17	4.38955620917354e-17	6.83468318152793e-17	1.00783346287519e-16	1.13022929185703e-16
2008206	11	1.69686843159105e-17	7.58677797703518e-17	3.81078586437347e-17	6.35053610169499e-17	1.03441807589545e-16	5.26063313220691e-17	9.45171980655995e-17	1.12571041720592e-16	8.9876191047028e-17	4.27084079523198e-17	1.68837400833189e-17	4.7508176673922e-17	1.10918345808319e-16	1.08684914731153e-16	4.45888358266474e-17	4.38890852476063e-17	6.6613285584508e-17	1.02744353264342e-16	1.02370428318832e-16
2008206	12	2.87345668583687e-17	6.70850009062627e-17	3.30960130971087e-17	6.24585474181403e-17	9.87435607427764e-17	5.09272745353751e-17	9.01422474058538e-17	1.00481007078072e-16	9.04006915653219e-17	6.1207234039536e-17	1.58364163485263e-17	4.04068165645928e-17	1.13712316821208e-16	1.01299350607772e-16	2.94806028016677e-17	4.27124637343697e-17	6.45124480516084e-17	1.01393844199773e-16	9.11320720213016e-17
2008206	13	4.18435820593609e-17	6.21606682281606e-17	2.9283741587149e-17	6.09465762745105e-17	9.25637787013398e-17	4.90939267426875e-17	8.86803123242255e-17	9.24739986046106e-17	8.95224078225391e-17	6.6894956824591e-17	1.58261819377346e-17	3.60453841434273e-17	8.853372105281e-17	9.37172420713909e-17	2.4589789407552e-17	4.18482559285763e-17	6.01948288083121e-17	9.75346641597329e-17	8.45785729607666e-17
2008206	14	5.55359011324733e-17	5.77885227753673e-17	2.90307137670303e-17	5.80313375820306e-17	8.41676764485164e-17	4.73112759121553e-17	8.67683376253743e-17	8.65506749229223e-17	8.79767852536319e-17	6.98288318262758e-17	1.6202940990556e-17	3.23582138322854e-17	8.49974490426382e-17	8.78919691798328e-17	2.46390841266678e-17	4.09828938987206e-17	5.36548021230977e-17	9.24062832379906e-17	7.7253235423075e-17
2008206	15	6.55150114601339e-17	5.41819970292435e-17	3.09829332382807e-17	5.4788754129875e-17	7.49288578137113e-17	4.56920704620248e-17	8.18253111567576e-17	7.97345419168986e-17	8.53219426237262e-17	6.98542158530179e-17	1.6452512250919e-17	2.96506801205033e-17	8.69290057266247e-17	8.22365487166992e-17	9.78693759849308e-17	4.09930811517355e-17	4.59339264500833e-17	8.63547828641527e-17	6.81103669930918e-17
2008206	16	7.19410404395749e-17	5.21702376863034e-17	3.2859159056296e-17	5.15726670943438e-17	6.72698596405507e-17	4.44056146753306e-17	7.53527119218371e-17	7.40634905275818e-17	8.07611896192575e-17	6.87672324626223e-17	1.7278600581718e-17	5.73638701210843e-17	1.23094981250096e-16	7.71056029788155e-17	7.6645941051635e-17	4.3367279692963e-17	3.835842807592e-17	7.93836767962253e-17	6.02962873607756e-17
2008206	17	7.28493400182845e-17	5.1083311790578e-17	3.32828724270936e-17	4.89843650995665e-17	5.69820715428356e-17	4.31879745518796e-17	6.95859991554118e-17	6.89306538072665e-17	7.48646341802035e-17	6.55415627069427e-17	1.8973411081794e-17	1.21784593398446e-16	1.22574196935654e-16	7.37235246730135e-17	6.70962034599151e-17	4.91299544574615e-17	3.23703770988626e-17	7.19715677678333e-17	5.4630592398719e-17
2008206	18	6.99602202840717e-17	5.01426829066406e-17	3.33045509751314e-17	4.68861011054096e-17	4.64358960166599e-17	4.26221159995654e-17	6.61831355410571e-17	6.23682883307301e-17	6.61214724190304e-17	6.16753598965435e-17	2.58970958655298e-17	1.20460457626356e-16	1.22441011183745e-16	7.09039207311072e-17	6.23404025886419e-17	5.90643132010584e-17	2.91500669808123e-17	6.4569452820436e-17	5.02640532937517e-17
2008206	19	6.62499761480825e-17	4.9112918948525e-17	3.43233434764735e-17	4.42120979686456e-17	3.80326734490725e-17	4.22549331983762e-17	6.43680183647678e-17	5.25027993674928e-17	5.880830808853e-17	6.24286259203356e-17	3.93190217341047e-17	1.19790225607369e-16	1.06674281627424e-16	6.55727952852739e-17	6.01139058158785e-17	6.5156332399685e-17	2.91562505628801e-17	5.85756141606553e-17	4.73969234982483e-17
2008206	20	6.27827685520421e-17	4.7639040190911e-17	4.47012906610521e-17	4.1660643120017e-17	3.33935242727568e-17	4.18104350809384e-17	6.47949051452279e-17	4.2444291706719e-17	5.34452398675371e-17	6.25891355203637e-17	5.41204036842958e-17	1.1934947934974e-16	9.86436941398444e-17	6.25621423677715e-17	5.7899366546278e-17	6.51916047311495e-17	2.99373183265835e-17	5.3553964338564e-17	4.50660934905991e-17
2008206	21	5.79080197604397e-17	4.57080692427894e-17	5.32221062730196e-17	3.9416600401179e-17	3.06934798039154e-17	4.1479360041962e-17	6.42068769107218e-17	3.53778049452141e-17	4.93602290598482e-17	5.9438817888988e-17	1.17479237129902e-16	1.19389429784732e-16	9.50726492211226e-17	6.02491932004518e-17	5.65140757720202e-17	5.32412321050048e-17	3.06248447906476e-17	5.05597943088615e-17	4.3328401745553e-17
2008206	22	4.93202644463566e-17	4.33328397637868e-17	5.54346304905973e-17	3.74232276874331e-17	2.90221120619878e-17	4.17951450150246e-17	6.18326818772989e-17	3.11736841255702e-17	4.56171579949977e-17	5.88819126248656e-17	1.16423021999378e-16	1.20392136780259e-16	9.27785665441052e-17	5.86204736841956e-17	5.74729145018062e-17	5.90549938630314e-17	3.15503201955488e-17	4.84889618355504e-17	4.20999756081922e-17
2008206	23	4.07982488364263e-17	4.08928898208069e-17	5.6338577312477e-17	3.58456939290754e-17	2.80758931430528e-17	4.39460976406893e-17	5.76268098154586e-17	2.92424944702059e-17	7.10124140410033e-17	5.90142397978323e-17	1.17195341858045e-16	1.21447561363534e-16	9.02527378993717e-17	5.77615561869878e-17	5.87697248217767e-17	6.61194830405346e-17	3.26803301815324e-17	4.61909630871698e-17	4.12685749682535e-17
2008207	0	3.49077305731962e-17	3.88461166494555e-17	5.77140531813318e-17	3.45177409227917e-17	2.70567576937494e-17	4.85502372022477e-17	6.11114693323826e-17	2.85250749513421e-17	1.19165839749275e-16	5.82591384905767e-17	1.16762585125409e-16	1.21407991509078e-16	8.72731614259712e-17	5.75669602518543e-17	5.88297690427933e-17	7.01489176831411e-17	3.38917263039459e-17	4.34618721057389e-17	4.08275577770194e-17
2008207	1	3.11784596046779e-17	3.72811826030945e-17	5.68100966149799e-17	3.34252223910691e-17	2.6122308117912e-17	5.57279299936809e-17	7.503328341327e-17	2.79327832485646e-17	1.1975292275944e-16	5.87771357218648e-17	1.16145435484613e-16	1.20719568877788e-16	8.38695548525353e-17	5.80159466301128e-17	5.83359835606135e-17	7.10310437451717e-17	3.59794151913656e-17	4.07045679676173e-17	4.06469407377515e-17
2008207	2	2.95940568774146e-17	3.597578630953e-17	5.56854472171098e-17	3.26228695988839e-17	2.53882383272807e-17	7.20895287988172e-17	8.61969090929991e-17	2.72422791958343e-17	1.05979583717443e-16	6.39063876335109e-17	1.16118155145596e-16	1.20450003414936e-16	8.04990460499372e-17	5.87543683232444e-17	5.59497044508132e-17	9.72762040992644e-17	3.9166684774945e-17	3.86371069361972e-17	4.06387181686128e-17
2008207	3	2.8900652950126e-17	3.49439146994492e-17	5.45437956425214e-17	3.22307513992913e-17	2.5223196689908e-17	1.02105035457336e-16	8.69462538301076e-17	2.59847268117323e-17	4.23103996919781e-17	7.15340719487282e-17	1.16642092793458e-16	1.20437383561452e-16	7.7887030636887e-17	5.91588184941846e-17	5.21081940027774e-17	1.08662869721419e-16	4.23836524458078e-17	3.83529831979295e-17	4.07149524864216e-17
2008207	4	2.79957874928331e-17	3.4412521139861e-17	5.35518675134205e-17	3.25440021916646e-17	3.49357588038922e-17	8.42703449080662e-17	6.98859767048638e-17	2.4826860292177e-17	3.46951963892391e-17	7.57482267404605e-17	1.16557134433698e-16	1.20970069250439e-16	7.55766889380732e-17	5.89007394445245e-17	4.77878795703317e-17	5.87744601836916e-17	4.44780096248709e-17	3.95946675200092e-17	4.07708965062677e-17
2008207	5	2.69821173893852e-17	3.44691540737559e-17	5.27409621665019e-17	3.32879408748101e-17	4.32132769858538e-17	8.90339689430878e-17	5.56999072536023e-17	2.79601730699329e-17	3.32144987457342e-17	6.74686987750839e-17	1.16086887929821e-16	1.21968264510638e-16	7.80286539833078e-17	5.82911281879648e-17	4.38963985216553e-17	4.8633638672856e-17	4.54063837747147e-17	4.05491066663992e-17	4.07533574434681e-17
2008207	6	2.59752068550161e-17	3.67254158774202e-17	5.80376736564725e-17	3.41695085827257e-17	6.49732413904186e-17	1.08071407170195e-16	4.25318983013956e-17	3.68367447254263e-17	3.41946417354541e-17	5.52515072649255e-17	1.16908596743297e-16	1.21787035210956e-16	1.23189229944099e-16	5.69542842778537e-17	4.08900387185944e-17	4.44684415903117e-17	4.56471189977187e-17	4.21099470483989e-17	4.05031656049566e-17
2008207	7	2.52098011897594e-17	4.4487299665794e-17	6.40079924016239e-17	3.50802677303939e-17	7.0455427343425e-17	1.06384228095361e-16	3.18067956142918e-17	4.55238709604457e-17	3.9623622904489e-17	4.30385797854419e-17	1.19005145043973e-16	1.17416339085939e-16	1.23243310368758e-16	7.10046527488646e-17	3.91035434881677e-17	4.24554498043907e-17	4.58022376582454e-17	4.76174712122129e-17	4.029074620483e-17
2008207	8	2.57672458974752e-17	5.59890371302682e-17	1.21463057796762e-16	3.6109724080389e-17	6.16166143225996e-17	6.93015487207694e-17	2.77352172880876e-17	5.65079493869016e-17	4.47718656581469e-17	3.30474660510179e-17	9.65007492943211e-17	1.11299530903613e-16	1.22979083735385e-16	7.47226429963899e-17	4.19985585661897e-17	4.19371887906469e-17	4.60658934612039e-17	5.60251329030376e-17	3.9934893890655e-17
2008207	9	2.81768186052709e-17	6.02693777155558e-17	1.21814049813416e-16	4.08483797317683e-17	4.67187344218182e-17	5.32609993498611e-17	2.8464894390562e-17	6.33834225103765e-17	4.75859835360519e-17	2.92302877176209e-17	8.82254844764181e-17	1.1232757829018e-16	1.22112312313031e-16	7.4242650962441e-17	4.45952512226257e-17	4.37666384496789e-17	4.65567204761783e-17	6.15342505655855e-17	4.01182145250576e-17
2008207	10	3.25934171196948e-17	5.72506263363015e-17	1.1497199689351e-16	4.183263341505e-17	4.40461540955986e-17	4.54509067622359e-17	3.13953057811258e-17	5.81531210519557e-17	5.16005910290461e-17	2.95795420676665e-17	8.17668841208232e-17	1.12635371611112e-16	1.2162285043027e-16	7.62911614086697e-17	4.80484795396976e-17	4.90187763495583e-17	4.78213170558263e-17	6.41023205603818e-17	4.20655853563923e-17
2008207	11	3.69260765352976e-17	4.7568291000172e-17	1.02372886643929e-16	4.25463905512334e-17	4.5146512874378e-17	4.13458797221373e-17	3.46663742768248e-17	4.8831798629754e-17	5.4892853484338e-17	3.04201700829258e-17	1.2022222228397e-16	1.11289394289418e-16	1.04309669282007e-16	7.89299535680384e-17	4.908282818601e-17	5.16702212609943e-17	4.88453781937275e-17	6.24727238510453e-17	4.43814275106114e-17
2008207	12	4.13051716303511e-17	4.2057086815858e-17	9.64302783273821e-17	4.35106260948633e-17	4.58562293391187e-17	4.06919541168796e-17	3.7835338976595e-17	4.48807613671555e-17	5.60765862041833e-17	3.24932778623802e-17	1.20002604731901e-16	1.10616555665782e-16	9.88428946544489e-17	8.03701118823018e-17	4.71045144076106e-17	5.13994793203007e-17	4.97903139661752e-17	6.09173760024971e-17	4.42571694753947e-17
2008207	13	4.39734523996889e-17	4.098285521402e-17	9.13428764798315e-17	4.41843581255969e-17	4.66757130023892e-17	4.21147777225079e-17	4.04881258185832e-17	4.45986921276531e-17	5.56254619057138e-17	3.59650526769714e-17	1.19866879777777e-16	1.10163939434621e-16	1.01569042264834e-16	8.06242011091089e-17	4.46417460834248e-17	5.12859526974113e-17	5.05389545557581e-17	5.88038729795073e-17	4.41230094635726e-17
2008207	14	4.47530683657718e-17	4.16931723517026e-17	9.11042727632689e-17	4.30478330411087e-17	4.74771882003532e-17	4.47225066724101e-17	4.22327414843591e-17	4.49677574096589e-17	5.44043801266041e-17	3.7598456190672e-17	9.88106195904671e-17	1.09905902100722e-16	9.00554845074335e-17	7.84432050097942e-17	4.23892069308433e-17	5.18206904816183e-17	5.03879376768728e-17	5.67593873559476e-17	4.30862653174262e-17
2008207	15	4.44581484209604e-17	4.09598885328563e-17	9.11981698934174e-17	4.18905909350121e-17	4.84226732643938e-17	4.70667817684505e-17	4.34975213873147e-17	4.54532154774068e-17	5.3113887543455e-17	3.83435258076249e-17	8.16480003037415e-17	9.17255889728905e-17	7.61132550172166e-17	7.51560017250012e-17	4.06580766979873e-17	5.18752857980695e-17	5.01204644032947e-17	5.50185497176732e-17	4.17164657737972e-17
2008207	16	4.35041241580751e-17	3.98888374953203e-17	8.68568725303559e-17	4.11659821830824e-17	4.93030847247843e-17	4.79377167588009e-17	4.44467148878575e-17	4.64637576379023e-17	5.22133756313258e-17	3.9417397282722e-17	7.32447394015351e-17	8.8375090999113e-17	6.77143776863812e-17	7.2236879071712e-17	4.05187323479353e-17	5.02299758668399e-17	5.02527275041463e-17	5.36543872026994e-17	4.04858791044997e-17
2008207	17	4.29513418342517e-17	3.8826097724403e-17	7.92535720700884e-17	4.08150208112949e-17	5.04720869399475e-17	4.66526650763061e-17	4.50138179676022e-17	4.78881103306469e-17	5.16815998417858e-17	4.05742772045947e-17	6.57619207222952e-17	8.16443926124355e-17	6.35163559390605e-17	7.03707013486952e-17	4.38765110701947e-17	4.7506683367615e-17	5.01746202455059e-17	5.26695181285574e-17	3.98493946042977e-17
2008207	18	4.31756639331282e-17	3.83374133310849e-17	7.3985074239374e-17	4.10015096432061e-17	5.18170398544312e-17	4.39327859518381e-17	4.54488034052891e-17	4.94943992213958e-17	5.16668926634826e-17	4.17290037861892e-17	1.171959579611e-16	7.28466655662132e-17	1.22544871297425e-16	6.82551437957502e-17	5.82426620493381e-17	4.41806239899003e-17	4.98670354632046e-17	5.20416428365396e-17	3.94925815086567e-17
2008207	19	4.41059167934177e-17	3.85409349987398e-17	6.85961519572971e-17	4.14072683275591e-17	5.28744962144404e-17	4.27864334908479e-17	4.56091497061437e-17	5.10177105909641e-17	5.21591976580186e-17	4.28396539170874e-17	1.13793136910306e-16	6.69150156705321e-17	1.07000679465635e-16	6.54531339623048e-17	8.08632360347084e-17	4.21793915499785e-17	4.96387810576031e-17	5.18825685754357e-17	3.98111847462713e-17
2008207	20	4.54307653340792e-17	3.90547939267852e-17	6.56702494675821e-17	4.17290721093711e-17	5.36222475914836e-17	4.26271417876841e-17	4.55582236959595e-17	5.25053993526073e-17	5.37419635189451e-17	4.37481855885197e-17	1.08976892001296e-16	6.3402475099354e-17	6.78873980622576e-17	6.16037734808671e-17	8.78627601952539e-17	4.30780461198223e-17	4.92188934157728e-17	5.25705161018086e-17	4.14549403582081e-17
2008207	21	4.67969599300923e-17	3.96313525122515e-17	6.28540399925013e-17	4.17735315519549e-17	5.37493318505893e-17	4.21015121039011e-17	4.64124559558438e-17	5.37454466232477e-17	5.73147302341246e-17	4.44093433634234e-17	1.08286556323606e-16	6.07849129839549e-17	5.84188691519599e-17	5.90766330143593e-17	8.3959655833671e-17	4.94232269186945e-17	4.87021214401888e-17	5.48222726750799e-17	4.56551863759931e-17
2008207	22	4.82342712859891e-17	4.02023177990037e-17	5.99508288420699e-17	4.17621465191311e-17	5.32598962359694e-17	4.18125405565719e-17	4.82005960277864e-17	5.43993746762079e-17	6.56352072613489e-17	4.51739742938418e-17	8.06291067461537e-17	5.88979571563593e-17	5.4463385525215e-17	5.7478902936784e-17	7.92032976600161e-17	5.68641741723466e-17	4.84969723871941e-17	6.02842091578158e-17	5.13113202082419e-17
2008207	23	4.94954764060907e-17	4.06373524669625e-17	5.69963345732846e-17	4.18677348159622e-17	5.18717735461449e-17	4.32039689555614e-17	6.21160602560716e-17	5.43585602483201e-17	7.26197373390678e-17	4.66815061975469e-17	6.9251829467019e-17	5.74705578437173e-17	5.25658703094204e-17	5.67582376482525e-17	7.65848946825358e-17	5.87777571821048e-17	4.85659232349431e-17	6.44765494919402e-17	5.66766723929458e-17
2008208	0	5.02720077095859e-17	4.08022417957806e-17	5.39526895120237e-17	4.20868363551556e-17	5.00830039819904e-17	4.51762130266215e-17	7.97172903704299e-17	5.35143003828727e-17	7.27270810818716e-17	5.12479529751358e-17	6.6404758910116e-17	5.62016963865171e-17	5.18671538956656e-17	5.69262760476222e-17	7.51741169963928e-17	5.77670703424748e-17	4.88502925168934e-17	6.31743974004229e-17	6.070220411749e-17
2008208	1	5.02999079383305e-17	4.08467739604382e-17	5.11292881016794e-17	4.24608081567034e-17	4.86135458396775e-17	4.64656656457233e-17	8.15535157250791e-17	5.20915671926739e-17	6.74117453163311e-17	6.09279967920111e-17	6.6640647425586e-17	5.50739358248466e-17	5.17563876943788e-17	5.76154264437717e-17	7.25448814904827e-17	5.58199981085278e-17	4.93609602158187e-17	6.02960172691206e-17	6.37997127689645e-17
2008208	2	4.99480642815934e-17	4.09220461575562e-17	4.80474582132143e-17	4.28304887638708e-17	4.86272346002899e-17	4.7290739802197e-17	7.26290621050705e-17	5.11493206753466e-17	6.15575215647212e-17	6.85373925557611e-17	6.73491830254231e-17	5.54478739986523e-17	5.53670710261721e-17	5.82745737608156e-17	6.87516769010104e-17	5.5566620441437e-17	5.00223681481492e-17	5.7728917801828e-17	6.61431615308068e-17
2008208	3	4.93778477116288e-17	4.10632212574988e-17	4.51111718903789e-17	4.32086073079257e-17	4.95676266779502e-17	4.78133845938612e-17	6.49294008927994e-17	5.55507075688758e-17	5.87231072484598e-17	6.85399402869742e-17	6.8136494605805e-17	5.58038914439742e-17	6.88098812477204e-17	5.85758718425377e-17	6.42793670256665e-17	5.53472106645169e-17	5.08435309857398e-17	5.81284054450481e-17	7.16130713398012e-17
2008208	4	4.90545763778126e-17	4.12460186846471e-17	4.29183779374266e-17	4.36147792910493e-17	5.08751298538927e-17	4.83608310872536e-17	6.09240111467377e-17	6.07364740972947e-17	5.85163204781107e-17	6.39095536473369e-17	6.81086624529963e-17	5.71766534911548e-17	1.20279699966407e-16	5.84631859584987e-17	5.94981079685539e-17	5.51394277973377e-17	5.1689239543247e-17	6.2951392998613e-17	7.69661985670842e-17
2008208	5	4.95533792238995e-17	4.13780153874312e-17	4.13135494515867e-17	4.38415407244983e-17	1.07689540633304e-16	4.92614694081259e-17	5.97673227032759e-17	6.8823514496636e-17	6.01070246831988e-17	6.17040762433762e-17	6.76969869103745e-17	5.75357272761251e-17	1.19713308196966e-16	5.73833573317185e-17	5.47297565146501e-17	5.51119250087327e-17	5.24121016727566e-17	7.0505123995507e-17	8.47004071992165e-17
2008208	6	5.10142764571537e-17	4.13282236208506e-17	4.34841361815698e-17	4.40943139555311e-17	5.25653510073171e-17	4.94427484548652e-17	1.06964945798065e-16	6.89199458453118e-17	6.13442323475195e-17	6.04484376247077e-17	6.77566996275938e-17	5.57648872272626e-17	1.1531971737262e-16	7.25453486135958e-17	5.10585350223123e-17	5.57344761540376e-17	5.3046237984696e-17	7.24614350855786e-17	8.46763914140453e-17
2008208	7	5.23240437567002e-17	4.17146710328905e-17	5.17114196301396e-17	4.41391892695861e-17	5.05849627923481e-17	5.01700094968711e-17	1.077465412855e-16	6.9876337775131e-17	6.02195280718412e-17	1.08053385533627e-16	6.7011312851222e-17	5.41784659224361e-17	1.1306333094284e-16	1.22273987989687e-16	4.89796166379766e-17	5.65292924435245e-17	5.48479919276297e-17	6.80770220010805e-17	1.20634366691744e-16
2008208	8	5.22820788804764e-17	4.274606843865e-17	5.9874892480385e-17	4.5374095341811e-17	5.01705384237339e-17	5.1610869790624e-17	9.12583383177063e-17	7.70332572876374e-17	5.79351163139865e-17	9.08040201065092e-17	6.61392837406738e-17	1.23469361188394e-16	1.14141370297187e-16	1.22490179076629e-16	5.48211524596087e-17	5.97923869963206e-17	5.6993911734482e-17	6.32567171210351e-17	1.20695136164745e-16
2008208	9	5.12305878824542e-17	4.38036906212376e-17	1.22655086398967e-16	4.87407565170733e-17	5.05451661183973e-17	5.21183648396606e-17	7.23717955511113e-17	6.23891174681416e-17	5.78038458992315e-17	8.80825751781543e-17	6.56801629398949e-17	1.23349039203819e-16	1.15257340731819e-16	1.22617238779441e-16	5.94052827115744e-17	6.68498335243877e-17	6.01702866407023e-17	5.95427253291316e-17	1.19961366817911e-16
2008208	10	5.04216374299273e-17	4.814501837702e-17	1.07871388343471e-16	5.24522398948519e-17	5.17187777391162e-17	5.84166455618585e-17	5.61218959502779e-17	5.40958157713419e-17	6.0146644098075e-17	7.6475254437665e-17	6.45695235004659e-17	1.23096580085456e-16	9.85038801034997e-17	1.20352402034397e-16	5.89156915399963e-17	7.01442035866132e-17	6.3322549618188e-17	5.79174316249721e-17	1.1958277884267e-16
2008208	11	5.10079456109374e-17	5.18471894542503e-17	1.05862161991537e-16	5.484826737862e-17	5.37810100177607e-17	6.25937809436644e-17	5.38826727356362e-17	5.16716742477632e-17	6.25128653881565e-17	5.9701875362715e-17	6.31252809498694e-17	1.22856845226095e-16	9.23434918554418e-17	1.12741515244645e-16	5.68759652447562e-17	7.50777748881503e-17	6.35434983369898e-17	5.76814497744182e-17	1.08935855043607e-16
2008208	12	5.35989601927281e-17	5.51233708287261e-17	1.0937152782805e-16	5.60803811475531e-17	5.53846321084068e-17	6.44406183686595e-17	5.33662258325349e-17	5.17096389395544e-17	6.35133154489219e-17	5.3023936526034e-17	6.19840909556532e-17	1.23755354894219e-16	7.7325716571205e-17	1.05516877822993e-16	5.4713747566377e-17	7.79843556198281e-17	6.23140371487316e-17	5.73130995913737e-17	1.01223874891473e-16
2008208	13	5.31161535256451e-17	5.57979135511702e-17	1.12106322913924e-16	5.59380136226147e-17	5.67803634817464e-17	6.80971114467958e-17	5.26751995959061e-17	5.27076867720813e-17	6.2846428961252e-17	5.01861640728114e-17	6.30038268128827e-17	1.02616964600955e-16	6.97595632085051e-17	9.91660612624533e-17	5.29848965218969e-17	8.22391756508349e-17	6.05042490201036e-17	5.59448865457789e-17	1.01818904529966e-16
2008208	14	5.04839513149549e-17	5.59742711040163e-17	1.11981842081968e-16	5.374902123436e-17	5.81852858346853e-17	7.1388456100428e-17	5.27911419178262e-17	5.45024677005808e-17	6.07023621674824e-17	4.89222333019942e-17	6.50159581568919e-17	7.95319904364744e-17	6.49928324043279e-17	9.34574546657801e-17	5.08182599813761e-17	7.82001788235038e-17	5.87650074898879e-17	5.42594756237932e-17	1.09840577106977e-16
2008208	15	4.86737076704908e-17	5.42118718428931e-17	1.11548462847662e-16	5.10271834192626e-17	5.94919225168702e-17	7.46160922090355e-17	5.3516736648371e-17	5.67896574934629e-17	5.78524087747404e-17	4.79458030195144e-17	6.84600422889901e-17	6.92849938608621e-17	6.13736655578474e-17	8.78513161012815e-17	4.86047121881521e-17	7.36676497533422e-17	5.8686081000035e-17	5.23979716879816e-17	1.18279040960599e-16
2008208	16	4.81598921635918e-17	5.21341358748103e-17	1.08198971269509e-16	4.86155971732604e-17	6.03663436515327e-17	7.78507726458416e-17	5.47758744923807e-17	5.87623237479987e-17	5.50015807353582e-17	4.7930060415175e-17	6.89745850390988e-17	1.2130324081397e-16	5.8966735461652e-17	8.32008513562656e-17	4.73477120500838e-17	7.66686797676398e-17	6.02509935878546e-17	5.08002530066086e-17	1.17636272747377e-16
2008208	17	4.88941582355183e-17	4.95723918383776e-17	1.11842651823413e-16	4.69081038166179e-17	6.04964009698542e-17	7.88898053331501e-17	5.55066807678365e-17	5.99232642341714e-17	5.24392635591344e-17	4.89125129906169e-17	6.9135204141666e-17	1.18877074309365e-16	5.72219439408067e-17	7.92948305572148e-17	5.0728949500009e-17	7.84669892381418e-17	5.96648812297317e-17	4.94516156991246e-17	1.16802544350564e-16
2008208	18	5.10374219754709e-17	4.73071276080621e-17	1.15525520148297e-16	4.61170823105765e-17	6.01672495126413e-17	7.52119681776093e-17	5.46080552523658e-17	6.06605640179032e-17	5.02641020108128e-17	4.99870706262492e-17	6.97158026968455e-17	1.01744144843388e-16	6.35138876178942e-17	7.45819093489239e-17	5.54743452962798e-17	7.00979294199629e-17	5.46944580013207e-17	4.82680828178791e-17	1.14430048744615e-16
2008208	19	5.36381663922771e-17	4.59794171562391e-17	1.15474438999018e-16	4.59396477647257e-17	5.97455556511283e-17	7.32815047165048e-17	5.26959238378902e-17	6.08996470178135e-17	4.85567075418128e-17	5.08334305329263e-17	7.12938803217219e-17	8.57567607308867e-17	7.10959040782277e-17	6.93643338467357e-17	5.86526410402938e-17	5.83235543945905e-17	4.87760154850798e-17	4.71376556964472e-17	1.06516283515626e-16
2008208	20	5.59421708779245e-17	4.54603159823363e-17	1.04654292846112e-16	4.57688872212087e-17	5.93049800267394e-17	7.00297821881437e-17	5.06110354855137e-17	6.06302544197655e-17	4.74223207606998e-17	5.04303314021155e-17	1.21715526234879e-16	1.19605889072182e-16	6.74199150184633e-17	6.451935710946e-17	5.80228142984542e-17	4.9947229742375e-17	4.39757442922003e-17	4.63723332911352e-17	9.70528232214339e-17
2008208	21	5.73482791300986e-17	4.53887713814957e-17	9.43001732324322e-17	4.52517989952347e-17	5.77713700034851e-17	6.12221245846971e-17	4.94188387338833e-17	6.01294803440717e-17	4.75950849205899e-17	4.95341795562876e-17	1.21685088946741e-16	1.20837336689264e-16	6.4166001200671e-17	6.13150442552331e-17	5.5626364913349e-17	4.52745125734259e-17	4.08064456798094e-17	4.62738916271548e-17	1.15472538287051e-16
2008208	22	5.74859017644124e-17	4.53047323183976e-17	9.42015629715693e-17	4.45506354822816e-17	5.4626285601084e-17	5.17465182920974e-17	4.87205453745503e-17	5.91541460244749e-17	1.02409291284147e-16	4.88643890445386e-17	1.21245275194045e-16	1.17946779886816e-16	6.21868134978339e-17	5.89109064702941e-17	5.28521795172154e-17	4.30628314467784e-17	3.8908695200018e-17	4.67231432865413e-17	1.15666918827536e-16
2008208	23	5.65081339045142e-17	4.49285493931497e-17	9.48570543905528e-17	4.38579530665315e-17	5.05028218773822e-17	4.64115197321144e-17	5.12796399495016e-17	5.69459090362104e-17	6.48336346277442e-17	4.86549575069166e-17	1.17316665384145e-16	1.11899622104404e-16	6.13042345745644e-17	5.71356256552259e-17	5.25870162748813e-17	4.15565912498976e-17	3.79809755726728e-17	4.74841083456889e-17	1.06292620272369e-16
2008209	0	5.51545422903923e-17	4.43342184473334e-17	1.15344310705474e-16	4.31783679633835e-17	4.65434377155634e-17	4.3880766012331e-17	5.87672352782286e-17	5.35277851543035e-17	5.51440451261916e-17	4.9644048431405e-17	9.81106101361246e-17	1.10996408026644e-16	6.09609435951109e-17	5.59299777022339e-17	5.4981809335125e-17	4.07711777053923e-17	3.76292782137714e-17	4.81468770069827e-17	1.0066929441398e-16
2008209	1	5.39918947417988e-17	4.36844537654718e-17	1.058153574978e-16	4.24340495643007e-17	4.33328194596332e-17	4.24416449886243e-17	6.41212362812293e-17	4.97387037739754e-17	5.0433541425812e-17	5.19812460675827e-17	8.61734284597154e-17	1.10074828846253e-16	6.03968784802676e-17	5.52928462541481e-17	5.81533088627902e-17	4.03035886181142e-17	3.76768356161681e-17	4.79492531280709e-17	1.10570260829301e-16
2008209	2	5.25532252484546e-17	4.3098494684861e-17	1.14753898895245e-16	4.16385912337738e-17	4.08794764296108e-17	4.14425260103252e-17	6.4829283537189e-17	4.62372928515576e-17	4.65904023718208e-17	5.49313630786969e-17	7.99322951156909e-17	1.08581060861481e-16	6.26200188312986e-17	5.49247300888413e-17	6.05398882626147e-17	3.99389237176259e-17	3.79480523055484e-17	4.66280141799021e-17	9.0239872349708e-17
2008209	3	5.04900746895274e-17	4.25421934403342e-17	1.03836767116127e-16	4.08608347724894e-17	3.90666730289899e-17	4.06625738795788e-17	5.98949337899295e-17	4.3215363788592e-17	4.32720556951278e-17	5.65527854524314e-17	1.21035236144877e-16	1.08022391426578e-16	6.98766419095382e-17	5.45197463310594e-17	6.1185646012413e-17	3.96596028090177e-17	3.85895950194494e-17	4.4548841080658e-17	7.50930167744831e-17
2008209	4	4.80761596745582e-17	4.19892232625786e-17	9.77542825089199e-17	4.01207808897971e-17	3.77414776182192e-17	3.99741394268056e-17	5.33597991099603e-17	4.07628063951779e-17	4.06656405327798e-17	5.62139296797387e-17	1.01881840391892e-16	1.08437072852352e-16	7.38543064557097e-17	5.39493066099832e-17	5.97250823438657e-17	3.95014856039246e-17	4.03400040193614e-17	4.26576358978864e-17	5.41281056095503e-17
2008209	5	4.5606360794441e-17	4.13062066368763e-17	9.26685582330793e-17	3.93396533653944e-17	3.68117910886702e-17	3.92209682894957e-17	4.74748316634696e-17	3.88669432458512e-17	3.88745769320165e-17	5.41215201214111e-17	9.03186650596655e-17	1.09169420800418e-16	7.71492514660937e-17	5.25369765963604e-17	5.65733308368007e-17	3.91595821232759e-17	4.31256488703343e-17	4.11224462916563e-17	7.94738052804923e-17
2008209	6	4.32439178853624e-17	4.03403694016193e-17	8.84443463869982e-17	3.84485218332413e-17	3.60465174595884e-17	3.83389901130604e-17	4.25839160437814e-17	3.74062019087072e-17	3.83828783237945e-17	4.9662425452052e-17	1.21527826056035e-16	1.08495597965115e-16	1.22704536495613e-16	5.79571366233511e-17	5.26550247389868e-17	4.16058047511466e-17	4.76209723658526e-17	4.02214352547367e-17	1.01984257193754e-16
2008209	7	4.12051560404487e-17	3.93363427774462e-17	8.77795361758496e-17	3.77988545045775e-17	3.59958653243169e-17	3.78412231226284e-17	3.90834416414153e-17	3.63673662204323e-17	3.97534326698764e-17	4.49061217058247e-17	1.20780166918134e-16	1.07795806665705e-16	1.22990317537376e-16	1.2120186481284e-16	4.94057338055893e-17	4.3039593429929e-17	5.20538398468914e-17	4.02279159225893e-17	1.14595228760748e-16
2008209	8	4.1846272372939e-17	3.85372077763283e-17	9.01571107501801e-17	3.76036310323592e-17	3.64926116684854e-17	3.77263652712383e-17	3.70446740862941e-17	3.59233019751397e-17	4.21770335486361e-17	4.14788985554593e-17	1.19738244158058e-16	9.46281116351859e-17	1.22780376681748e-16	1.21872101104359e-16	5.04726796865874e-17	4.63092916500229e-17	5.50552314989868e-17	4.13774748904019e-17	8.31582795236058e-17
2008209	9	4.13983220688487e-17	3.87720082496839e-17	8.93484900290788e-17	3.82469837505153e-17	3.70381942513478e-17	3.85555898177712e-17	3.69543636906823e-17	3.57989671708624e-17	4.51301130380505e-17	4.0354525910286e-17	1.18857452904203e-16	8.46682980381459e-17	1.22321508828464e-16	1.21500556454741e-16	5.13412755356836e-17	4.47324202059328e-17	6.0286309332388e-17	4.4335394427183e-17	7.65471369850217e-17
2008209	10	3.96677708472739e-17	4.00261716897353e-17	8.49193561773982e-17	3.85206364530338e-17	3.88608033091667e-17	4.00993352977271e-17	3.78008055343769e-17	3.59293757220083e-17	4.84218362992369e-17	3.91774925174721e-17	1.18983666063908e-16	7.93551277660548e-17	1.13157003848829e-16	1.1299471701522e-16	4.919072344498e-17	4.32613361123361e-17	6.23634012990544e-17	4.787353700492e-17	1.21337642381909e-16
2008209	11	3.84127908543331e-17	4.0180563381407e-17	8.08931089719862e-17	3.82389477457885e-17	4.03401432655317e-17	4.00765589274162e-17	3.82801740717254e-17	3.65876543408883e-17	5.14611514910246e-17	3.87137185076672e-17	1.19627951972557e-16	7.35670079099443e-17	8.43160343619027e-17	1.02606639275155e-16	4.64077202365192e-17	4.18901221541073e-17	6.39890837459568e-17	4.95512979076286e-17	1.20734742021653e-16
2008209	12	3.75166342195297e-17	4.03815052650627e-17	7.70329330341041e-17	3.7657978922005e-17	4.1966401068135e-17	3.91064078398273e-17	3.84846863345312e-17	3.76639362512148e-17	5.38283218854912e-17	3.71951211195039e-17	1.20376742159822e-16	7.2981847120659e-17	6.5255623081499e-17	9.13994821624298e-17	4.47395229365896e-17	4.06626168657232e-17	6.54227884894319e-17	5.02110286553501e-17	1.18447721448763e-16
2008209	13	3.68998597646996e-17	3.92127522775445e-17	4.31654543738506e-17	3.70089585007383e-17	4.43418374937992e-17	3.82256746188459e-17	3.96604323496374e-17	3.88881597407722e-17	5.48698590768698e-17	3.62240718399564e-17	1.21044695257889e-16	7.61451790747535e-17	5.48121415121487e-17	8.04699246113109e-17	4.38175157937795e-17	3.96745680260303e-17	7.33626433335965e-17	4.97713906308275e-17	1.14446760052634e-16
2008209	14	3.64240489951247e-17	3.81450872464698e-17	2.93514177511822e-17	3.68656413901103e-17	4.70904409972673e-17	3.71589406845098e-17	4.23582923467199e-17	4.07508189267733e-17	5.47095824600126e-17	3.5946632471093e-17	1.21104391678619e-16	8.54583500443692e-17	4.88293701793267e-17	7.12101620660325e-17	4.25998170691424e-17	3.89852408646795e-17	8.01439411805378e-17	4.93204701475817e-17	1.11526008338763e-16
2008209	15	3.61090238114159e-17	3.66651092484343e-17	7.24218266567125e-18	3.71180940246707e-17	5.01142512416215e-17	3.62965042428773e-17	4.56528417392644e-17	4.29485508010069e-17	5.40397255992355e-17	3.70123041071969e-17	1.19313064636397e-16	8.57836939349255e-17	4.55218056557041e-17	6.29050589155584e-17	4.18097591437411e-17	3.86180405644819e-17	8.49851619208939e-17	4.90772729436508e-17	1.09678394588094e-16
2008209	16	3.59184642563894e-17	3.53500221960378e-17	4.79633276435405e-18	3.75820840350683e-17	5.37133342716794e-17	3.5746291052088e-17	4.92012422404516e-17	4.53073985882517e-17	5.33222115880362e-17	3.93401639475724e-17	1.15766344721859e-16	6.47388889394478e-17	4.31035287305892e-17	5.59245023716959e-17	4.15829329175101e-17	3.85522540494553e-17	9.09128046727186e-17	4.82057267807101e-17	1.08479554035916e-16
2008209	17	3.65552043382681e-17	3.42010641969609e-17	3.21887852573195e-18	3.80220781985252e-17	5.7638477631349e-17	3.52974399099121e-17	5.27094583330931e-17	4.8077080020571e-17	5.28730452892277e-17	4.22094752252281e-17	1.13093043057281e-16	5.06286475504119e-17	4.10658629059403e-17	5.01403654689867e-17	4.15924445705257e-17	3.83701907145082e-17	9.74355633783159e-17	4.73847290006545e-17	1.08265161054487e-16
2008209	18	3.77209332459535e-17	3.35228788597021e-17	5.7408819084417e-18	3.85892401796181e-17	6.11050349594961e-17	3.5166353244846e-17	5.52147825027095e-17	5.10757295608344e-17	5.28434481475401e-17	4.5526843891874e-17	1.1325288997046e-16	4.14855484802238e-17	4.00691344296442e-17	4.49483175937842e-17	4.22777026718213e-17	3.81931178840613e-17	1.01559881090913e-16	4.59904160752346e-17	1.11241130737887e-16
2008209	19	3.9363582650066e-17	3.34054850890742e-17	1.11900234382893e-17	3.89759299540679e-17	6.28191119598513e-17	3.55431126103913e-17	5.67670255689967e-17	5.39789294146787e-17	5.30123295856595e-17	4.86450770664748e-17	1.13036071297897e-16	3.42946987653987e-17	3.88645165581672e-17	4.11765744761721e-17	4.3583197315945e-17	3.78139227140616e-17	1.03266761725355e-16	4.50470928511083e-17	1.15967431375424e-16
2008209	20	4.10704082963256e-17	3.39267176136843e-17	1.35211268792163e-17	3.93925570757005e-17	6.26984139306047e-17	3.63209012233066e-17	5.78852360381528e-17	5.59222634472353e-17	5.38470576398137e-17	5.11550699982612e-17	8.37383596611835e-17	3.15717522721229e-17	3.7678727013443e-17	3.89021001113754e-17	4.56834171979959e-17	3.74527382385722e-17	1.02092870210266e-16	4.36101724277095e-17	1.16287297133392e-16
2008209	21	4.24442748732432e-17	3.46912500208066e-17	1.75718698111111e-17	3.98671257492762e-17	6.1032835662315e-17	3.6895993302415e-17	5.93459615895585e-17	5.65940069909331e-17	5.55020437568508e-17	5.33075640297114e-17	4.46195737682657e-17	3.39760787890896e-17	3.71894710643728e-17	3.73458157768804e-17	4.79402668502232e-17	3.6555778262461e-17	9.94542656442357e-17	4.20456438345466e-17	9.11420446123874e-17
2008209	22	4.341122821995e-17	3.54306890420442e-17	2.07467609704578e-17	4.05586967385215e-17	5.95116503251368e-17	3.7040166056827e-17	6.0664941591793e-17	5.57943850111189e-17	5.59965782424304e-17	5.5361099433528e-17	3.46326455464425e-17	4.20444725030112e-17	3.72443450324702e-17	3.61536426432918e-17	4.96283386303058e-17	3.56642758574797e-17	9.8290684835958e-17	4.05656380397659e-17	6.97434183387041e-17
2008209	23	4.44211644486973e-17	3.60286811780453e-17	2.31017561427362e-17	4.16282938646785e-17	5.87161704952478e-17	3.68600778318873e-17	6.13887826559992e-17	5.38337373332406e-17	5.78240537571723e-17	5.69900811564865e-17	3.30043681293402e-17	5.0337803635845e-17	3.75747793325638e-17	3.52453901765802e-17	5.08446462523905e-17	3.4889737999402e-17	1.17711676874147e-16	3.97837630795883e-17	5.80822084184607e-17
2008210	0	4.48860216440793e-17	3.64367929164944e-17	2.46325342283209e-17	4.32131469498717e-17	5.85791954890968e-17	3.65470138818334e-17	6.15462248696782e-17	5.18853462340982e-17	5.9370088221433e-17	5.78440090574372e-17	3.24515615816412e-17	5.2000954747679e-17	3.80436905291476e-17	3.45218913382507e-17	5.18049298222136e-17	3.43561036580869e-17	1.15448936827723e-16	3.95258660850217e-17	5.14947776600435e-17
2008210	1	4.46717054804782e-17	3.66997803991582e-17	2.47206458591952e-17	4.53245320950024e-17	5.91359295226696e-17	3.63911432004388e-17	6.10771698612195e-17	5.06376678981837e-17	6.04226003171683e-17	5.7816924662801e-17	3.1777962822432e-17	4.73292528103771e-17	3.84660505208604e-17	3.39254569404078e-17	5.28021956508961e-17	3.41578425495904e-17	1.1369313575614e-16	4.01048311476254e-17	4.79480290561783e-17
2008210	2	4.41086627562143e-17	3.70082134456119e-17	2.30321011682311e-17	4.78442001699533e-17	6.01926637585419e-17	3.64098714580113e-17	6.07354799383038e-17	5.0151583460519e-17	6.09580907538195e-17	5.71713245692855e-17	3.04960060680563e-17	3.85879640036701e-17	3.8520083105409e-17	3.33967809541825e-17	5.35846287038593e-17	3.40924038069955e-17	1.12993561197741e-16	4.3151432854291e-17	4.64299685420674e-17
2008210	3	4.35393479832948e-17	3.76156530723801e-17	2.0398644994514e-17	5.03824829032374e-17	6.13891665068378e-17	3.66878579696621e-17	6.02885080496229e-17	5.04378654777285e-17	6.10621947856108e-17	5.59382528839092e-17	2.84490696777848e-17	2.96859787613367e-17	3.84210599454953e-17	3.29427080809589e-17	5.41277558281509e-17	3.39547783980859e-17	1.13500637029051e-16	4.41175365129269e-17	4.52711900519187e-17
2008210	4	4.32528870342692e-17	3.86204355839053e-17	1.76083284043113e-17	5.26996770266265e-17	6.40014510649217e-17	3.71028652579221e-17	5.97265263575459e-17	5.14176634324606e-17	6.05561409079992e-17	5.47710271279407e-17	2.58845510810904e-17	2.34023753073666e-17	3.80932345049719e-17	3.24877915136012e-17	5.4382066736652e-17	3.38192496687644e-17	1.13859763307897e-16	4.66848495056262e-17	4.44400267740564e-17
2008210	5	4.29913818400667e-17	3.98215468290765e-17	1.61879888361603e-17	5.44350759542684e-17	7.22480943217683e-17	3.73951104704081e-17	5.89348456652623e-17	5.27782515935242e-17	6.00109932287931e-17	5.38197987799896e-17	2.37868939715716e-17	1.83617603865436e-17	3.73552342264014e-17	3.18707751442383e-17	5.43812754789722e-17	3.43445645347362e-17	1.13494617450522e-16	4.751367883093e-17	1.07344320845107e-16
2008210	6	4.27756872141299e-17	4.06713283480567e-17	1.19249192809969e-16	5.49669381442992e-17	7.90031581655759e-17	3.73485235360857e-17	5.79092718748124e-17	5.438436186981e-17	6.00717478609714e-17	5.30461057924545e-17	2.18975515964723e-17	1.39420510798365e-17	3.96017897004325e-17	3.00868823514243e-17	5.40638775489468e-17	3.44641004840259e-17	1.12003634085668e-16	5.02268807513135e-17	1.09529164011341e-16
2008210	7	4.27883430878884e-17	4.08748809870079e-17	1.2079395764503e-16	5.460868432652e-17	8.84357359053962e-17	3.71949505632379e-17	5.63079188119464e-17	5.70436489168898e-17	6.11315935372545e-17	5.18833854981836e-17	2.02365151309677e-17	1.04210459094533e-17	4.01907584803938e-17	3.86949728815997e-17	5.57381142525012e-17	3.54024417390084e-17	1.10046392184798e-16	5.07769387694706e-17	9.38923235231369e-17
2008210	8	4.29899098147532e-17	4.06288160466381e-17	1.20872040334227e-16	5.35890530971751e-17	1.10203660298294e-16	3.70823321507178e-17	5.5579709264713e-17	6.00191061494689e-17	6.13348459474447e-17	5.08272006184795e-17	1.91604841752224e-17	7.74749565620275e-18	4.37503454320025e-17	4.63347492698306e-17	6.54927194196703e-17	3.75997274181933e-17	1.0539801246218e-16	5.13957838096314e-17	7.9174289590846e-17
2008210	9	4.33319028670006e-17	4.04321084416108e-17	1.20779561250425e-16	5.50508891809103e-17	1.0734009696753e-16	3.73395925995715e-17	5.81764546819301e-17	6.32338256436132e-17	6.12770438476104e-17	5.14497243945271e-17	1.8060188920308e-17	5.63727427065399e-18	4.6686986122293e-17	5.06455711273672e-17	6.70690034913758e-17	3.97266273906092e-17	9.31807045659627e-17	5.2812727691086e-17	6.82401400407366e-17
2008210	10	4.40476274162901e-17	4.12881523051446e-17	1.20588321338655e-16	5.7698720112481e-17	9.47785118129301e-17	3.87297168620245e-17	6.01383284326065e-17	6.83853428125791e-17	6.14305320466133e-17	5.22108215279071e-17	1.74433966203165e-17	3.92826830412824e-18	5.16155682645497e-17	5.21330405631672e-17	6.50311935381284e-17	4.10656278000674e-17	8.53083874522321e-17	5.39013453778739e-17	6.90932885493405e-17
2008210	11	4.53223230926591e-17	4.25224500256874e-17	1.20399094435616e-16	5.84235839211053e-17	8.46507528911933e-17	4.00878400010369e-17	6.19105230307601e-17	7.35018145789854e-17	6.12610859933931e-17	5.31528634761021e-17	1.58556604395388e-17	2.60970049415222e-18	5.32313590310589e-17	5.27168287606503e-17	6.25420737168594e-17	4.03205272037703e-17	8.24785994473441e-17	5.35413255324508e-17	6.35498386650677e-17
2008210	12	4.68886002277775e-17	4.27710452993778e-17	1.20250296252296e-16	5.71943607360963e-17	8.19663406670675e-17	4.0129274768611e-17	6.12875002685743e-17	7.50470943912813e-17	5.97920191138867e-17	5.4113952194326e-17	1.34365385824656e-17	1.7597219484778e-18	5.47068200914086e-17	5.21201892912455e-17	5.99340012830394e-17	3.97735587139475e-17	8.34431771343671e-17	5.11531322497147e-17	6.0460248573444e-17
2008210	13	4.84602565659709e-17	4.26540670652003e-17	1.20062521798668e-16	5.56332191516483e-17	8.20702944591667e-17	3.96651336053347e-17	5.98708055051705e-17	7.34611102272349e-17	5.71598266337625e-17	5.36773158837514e-17	1.07554566490946e-17	1.2698763272106e-18	5.50867341891177e-17	4.99760892790655e-17	5.76901416645362e-17	3.92675812835202e-17	8.87904208023416e-17	4.81298322256317e-17	1.17859441790653e-16
2008210	14	5.00447738949219e-17	4.1941124645309e-17	1.19735450558916e-16	5.41542917999822e-17	8.12253603311737e-17	3.91842985922869e-17	5.88290491558538e-17	7.20652094801517e-17	5.50022971849894e-17	5.3442248323103e-17	8.42975994984584e-18	9.89221551271471e-19	5.44192412956744e-17	4.80656634764877e-17	1.08005476569376e-16	3.90974682792628e-17	9.89755663185022e-17	4.56086588277867e-17	1.18538101014299e-16
2008210	15	5.11324336193252e-17	4.14654790538231e-17	1.1935302329587e-16	5.24961309285223e-17	7.88943267000978e-17	3.89167385077786e-17	5.79793920957806e-17	7.16819076815467e-17	5.35911338935891e-17	5.23153345502538e-17	6.71353892858832e-18	9.71885141326083e-19	5.37397128666245e-17	4.52832288096291e-17	1.1360580784419e-16	3.9279277982626e-17	1.04034155411451e-16	4.4404513502655e-17	1.19336297389697e-16
2008210	16	5.19615002701245e-17	4.13969675281765e-17	1.19037627652884e-16	5.17433249354994e-17	7.5861011368795e-17	3.91246190985848e-17	5.78638712929639e-17	7.14749700228171e-17	5.2615799658135e-17	5.13632810522869e-17	5.51161943728572e-18	1.52629902319786e-18	5.27900633323856e-17	4.24329022864494e-17	1.13573926397094e-16	3.97554728762659e-17	1.0219571589196e-16	4.98010275491522e-17	1.20802917186015e-16
2008210	17	5.2366337098027e-17	4.13256016356025e-17	1.18125537087346e-16	5.11478912278362e-17	7.29916606263868e-17	3.95723803055601e-17	5.67631791479553e-17	7.02655868828807e-17	5.19441319061854e-17	5.12674371258083e-17	4.66201749176198e-18	4.06242179283273e-18	5.07992083586069e-17	3.98514263684554e-17	1.13464883755707e-16	3.97206791327741e-17	9.0126349054183e-17	5.04450415389808e-17	1.12821386037458e-16
2008210	18	5.28254795152054e-17	4.16658829674424e-17	1.1223283600895e-16	5.08328461906289e-17	7.15706037371546e-17	3.99635189716237e-17	5.59959919539911e-17	6.88931815609871e-17	5.38104750249714e-17	5.14086173273026e-17	4.08898699900359e-18	6.19157119955479e-17	4.84551034516516e-17	3.79690988325642e-17	1.03563169709436e-16	3.90739925240261e-17	7.49071220593989e-17	5.20634248637004e-17	9.9964012606906e-17
2008210	19	5.3804338013035e-17	4.20616092722572e-17	1.01201219846497e-16	5.06865257304146e-17	7.24119986318381e-17	4.01740013807916e-17	5.57499135927748e-17	6.76665635328686e-17	5.18785185435837e-17	5.24710258143073e-17	3.68531764811665e-18	1.09613761539711e-16	4.57829777909691e-17	3.62332068685922e-17	9.48566836335543e-17	3.8494845830842e-17	6.10446931421974e-17	5.08996873768495e-17	8.51254587780343e-17
2008210	20	5.46821178258829e-17	4.27963410754984e-17	9.05531564016523e-17	5.06763437138666e-17	7.36486865215715e-17	4.06889344022949e-17	6.18637131637162e-17	6.6647067202451e-17	4.92407474025287e-17	5.58276693732498e-17	3.33340945052859e-18	1.08837731757365e-16	4.37125409194081e-17	3.59147803218323e-17	8.70815584061091e-17	3.8246988975406e-17	5.25623886205639e-17	4.74802470833709e-17	7.26157988546587e-17
2008210	21	5.48350591022777e-17	4.36952134456151e-17	8.36360573121282e-17	5.04909768904457e-17	7.28164095853782e-17	4.1268620291096e-17	5.73277193113322e-17	6.67370507050272e-17	4.8407382600404e-17	6.01096603292488e-17	2.99355451539469e-18	1.08626992295914e-16	4.21232197973356e-17	4.05382995648078e-17	7.85565384463219e-17	3.81760007799878e-17	4.7939341371037e-17	4.44220347950651e-17	6.32069410032509e-17
2008210	22	5.43693147298897e-17	4.44182635552464e-17	7.93820678489258e-17	5.05154982881407e-17	6.92512672333913e-17	4.20045925719115e-17	5.78624412545367e-17	6.66006936817256e-17	5.23240563769428e-17	5.82469245167681e-17	2.70176927611657e-18	1.0862206405315e-16	4.10267764227894e-17	5.14243674695952e-17	7.32076176502696e-17	3.83067148910994e-17	4.43375844243166e-17	4.13970417754976e-17	5.79473624090327e-17
2008210	23	5.38504304046762e-17	4.49268496986671e-17	7.71695014112598e-17	5.09999535735753e-17	6.43714147813731e-17	4.25744100981477e-17	5.94645398817735e-17	6.49359898992356e-17	5.66544932981691e-17	5.79830780784842e-17	2.4864741139003e-18	1.09306868671357e-16	4.03660208139486e-17	5.63435311478258e-17	6.96638219557022e-17	3.8604690708732e-17	4.18910043390635e-17	4.05797122596024e-17	5.43351891439354e-17
2008211	0	5.37239296895296e-17	4.5344851874786e-17	7.64619332447317e-17	5.17888041560943e-17	5.91020617066445e-17	4.30681783538014e-17	6.01487005078143e-17	6.23636542674612e-17	5.69068402751621e-17	5.86005823587186e-17	2.52913610663001e-18	5.8888400047513e-17	3.98919688804129e-17	5.14237078884665e-17	6.68463308816239e-17	3.89736957228079e-17	3.98777913047154e-17	4.55894031573653e-17	4.98533972163351e-17
2008211	1	5.36569457259405e-17	4.57396644957164e-17	7.6409507899916e-17	5.2614088592212e-17	5.370994191238e-17	4.37204997475702e-17	5.94900340628643e-17	5.93315352421501e-17	5.21552255583984e-17	5.86898022176082e-17	2.25525404344947e-18	3.90894389208235e-17	4.09387502843928e-17	4.47212116296195e-17	6.5494038550193e-17	3.93625340070716e-17	3.82620576946781e-17	1.15378458901915e-16	4.54182572894529e-17
2008211	2	5.32487665193405e-17	4.60828385961392e-17	7.62156505625971e-17	5.33762913587594e-17	4.88711693366713e-17	4.44463908572401e-17	5.66245378445711e-17	5.608583845416e-17	4.64142763757579e-17	5.78327402557942e-17	1.96065111088414e-18	2.74951509744732e-17	4.17814530906312e-17	3.94545042425021e-17	6.55391953348735e-17	3.97483152140767e-17	3.67074169493472e-17	7.38507060445997e-17	4.18110238330033e-17
2008211	3	5.26216442937697e-17	4.63783764726597e-17	7.53699946440212e-17	5.41163681937641e-17	4.547641615248e-17	4.49956652120479e-17	5.24357574153578e-17	5.29092564674885e-17	4.15213793111164e-17	5.56686632713101e-17	1.89931450707753e-18	2.14100636883983e-17	4.21675473589368e-17	3.56989348746108e-17	6.47587621102883e-17	4.01290212611944e-17	3.48579565895192e-17	5.02005776656485e-17	4.29446042606831e-17
2008211	4	5.193559887113e-17	4.66849768468049e-17	7.38374254897238e-17	5.47734641782496e-17	4.27169021808673e-17	4.54579520482012e-17	4.797163484806e-17	4.96769462022935e-17	3.73474355670267e-17	5.25438848567851e-17	2.138362446206e-18	1.74997911986855e-17	4.27359635143502e-17	3.27760221285944e-17	6.37563263973858e-17	4.05275706745049e-17	3.27336314773204e-17	4.27213800960736e-17	4.71294116042639e-17
2008211	5	5.12679875463912e-17	4.69421963489271e-17	7.20831568692572e-17	5.52245571297144e-17	4.06150956875694e-17	4.57871799637096e-17	4.36882341488014e-17	4.70218182292467e-17	3.44505986398503e-17	4.93248121710252e-17	2.79640017055681e-18	1.51426620243772e-17	4.78091584253077e-17	3.04931644245676e-17	6.53120385973231e-17	4.07572746772243e-17	3.01977730297357e-17	3.84306075597219e-17	5.57546424892995e-17
2008211	6	5.06032511957659e-17	4.70073071446415e-17	7.02227058782656e-17	5.51555253825537e-17	3.92844038192839e-17	4.6141167916605e-17	4.03193857376781e-17	4.411068803188e-17	3.26057099276299e-17	4.6721141991958e-17	3.78216045763866e-18	1.30690900904364e-17	6.5495393021317e-17	2.91660614639193e-17	7.09727925444997e-17	4.2871019376674e-17	2.6928499093604e-17	3.51424743128609e-17	1.13254026474423e-16
2008211	7	4.96028626898192e-17	4.68933543086531e-17	9.7924595697938e-17	5.53288204200079e-17	3.81547654490388e-17	4.59572241156375e-17	3.88515822424827e-17	4.20731992367672e-17	3.05953824834581e-17	4.37683281408195e-17	4.80322201107262e-18	1.08846016172617e-17	1.23471552460094e-16	2.82010066596801e-17	7.54586429531546e-17	4.92402805256966e-17	2.33158217921309e-17	3.2621383165035e-17	9.44657622659168e-17
2008211	8	4.89419531016895e-17	4.66664911957018e-17	1.21483790034517e-16	5.62115044451896e-17	3.67752450955045e-17	4.60765875880582e-17	3.63384107334942e-17	4.04436115408871e-17	2.89461287109869e-17	4.17193473149259e-17	5.62665427759971e-18	8.66040161510269e-18	1.23454154854426e-16	2.93806060940993e-17	7.34253460271747e-17	5.6933496620297e-17	2.00210346755373e-17	3.05553133388144e-17	8.03679482526213e-17
2008211	9	4.8679893872599e-17	4.65588961649893e-17	1.20880599764788e-16	5.74147801752874e-17	3.55242871191235e-17	4.64557377991247e-17	3.79119249871761e-17	3.9351870565215e-17	2.80668682921317e-17	4.35167136364994e-17	5.7396004584531e-18	6.25322965429052e-18	1.23337099876416e-16	3.04751340086219e-17	6.55970411835485e-17	5.78146377759789e-17	1.71333403411564e-17	2.90688180154913e-17	6.5874447745915e-17
2008211	10	4.73630175348073e-17	4.70353210583976e-17	1.18151617604806e-16	5.54185766083124e-17	3.41725198076454e-17	4.76065261378638e-17	3.79218431824512e-17	3.7026647610342e-17	2.75534151967469e-17	4.43632392032149e-17	5.39081426430687e-18	4.0118822825919e-18	1.23290286817777e-16	3.05992979675234e-17	6.01196597313519e-17	5.80118902370219e-17	1.39365179285403e-17	2.8512798576764e-17	1.19281011290073e-16
2008211	11	4.63167958523461e-17	4.78480627310224e-17	1.12937056559266e-16	5.15630291503441e-17	3.19189173712152e-17	4.88016246251634e-17	3.86112490085984e-17	3.5901622637292e-17	2.70671255231845e-17	4.61169735135519e-17	4.8996109652685e-18	2.58749579846622e-18	1.23172744640545e-16	3.40924477353029e-17	5.61955167097846e-17	5.63179584334824e-17	1.12634032429776e-17	2.85714179898865e-17	1.1882632897801e-16
2008211	12	4.4578599575001e-17	4.80409692446283e-17	1.06866047023343e-16	4.84954987777454e-17	2.90309595338382e-17	4.93014699598866e-17	3.77788285799515e-17	3.4905163261444e-17	2.65985000495599e-17	4.41473156009411e-17	4.50541674667381e-18	1.5611768682754e-18	1.22844670372667e-16	4.30525770351908e-17	5.3165841031852e-17	5.5568372629631e-17	9.34526821607006e-18	2.8800911288275e-17	1.17466831529144e-16
2008211	13	4.22353391775587e-17	4.85075264010926e-17	9.88871372157486e-17	4.52625722920333e-17	2.58228842954715e-17	4.91211429611868e-17	3.63574750678265e-17	3.28129846501801e-17	2.62747784757399e-17	4.29201404365502e-17	4.05942718306023e-18	9.00499783221318e-19	1.22088161677058e-16	5.71824768958217e-17	5.11100061499185e-17	5.37122589946317e-17	8.4431467623003e-18	2.8618746210057e-17	1.05669870934828e-16
2008211	14	3.91803327885064e-17	4.82063381194921e-17	9.11830522939243e-17	4.23958948184601e-17	2.32376277213179e-17	4.87528656794507e-17	3.44867005790298e-17	2.99433908778045e-17	2.59640025019966e-17	3.94582318553767e-17	3.49828522095369e-18	5.38258617070174e-19	1.18672271075315e-16	8.69739382850057e-17	4.91426974433052e-17	5.20887336756151e-17	8.31207055672499e-18	2.78921685969514e-17	1.10792969415934e-16
2008211	15	3.59056280978609e-17	4.76295702612949e-17	8.48917030555531e-17	3.96083914629475e-17	2.11614588581807e-17	4.8351279206494e-17	3.17452063991712e-17	2.63179524502255e-17	2.56231465803118e-17	3.55131600440815e-17	2.91237633674054e-18	3.40553177879928e-19	1.10494043187564e-16	6.68390912681757e-17	4.71634079632448e-17	5.02484595842307e-17	8.53270547081453e-18	2.68653255728189e-17	1.03930797354944e-16
2008211	16	3.28375024552373e-17	4.69283641942831e-17	7.99158800034498e-17	3.69066567723817e-17	1.84501030182997e-17	4.79386153584324e-17	2.94548105415143e-17	2.35190175560948e-17	2.5165325451829e-17	3.26944079837057e-17	2.43186679571286e-18	2.48154036505506e-19	1.10360943835924e-16	5.77630484318903e-17	4.54406924103904e-17	4.89437992873456e-17	8.86772028511658e-18	2.58499403275374e-17	1.16555989687e-16
2008211	17	2.98696067603492e-17	4.62267193514358e-17	7.5055080817452e-17	3.34467234708795e-17	1.49847142508673e-17	4.70983050089816e-17	2.67801631172063e-17	2.14607015841435e-17	2.4499716100115e-17	2.98672811841735e-17	2.10546426308941e-18	1.95927313500724e-19	1.11283888805377e-16	1.17492122512772e-16	4.66034176211466e-17	4.74209648336632e-17	9.23580314346165e-18	2.52321131608893e-17	1.11759328944024e-16
2008211	18	2.68854205216134e-17	4.50511829936242e-17	6.91006864712583e-17	2.87855463119776e-17	1.11148009115889e-17	4.58427702354338e-17	2.44872354698931e-17	1.94946031595745e-17	2.35716677606722e-17	2.7336059643525e-17	1.88085882146683e-18	1.55961980220303e-19	1.20185452520226e-16	8.63025581948103e-17	5.72294588373256e-17	4.54767469672824e-17	9.80481889710853e-18	2.50807564572673e-17	1.11103001195068e-16
2008211	19	2.40507079014313e-17	4.33703669895515e-17	6.00048830080924e-17	2.45098672746116e-17	9.23126070439325e-18	4.52723145930229e-17	2.22115836633055e-17	1.67286238895411e-17	2.20250384006652e-17	2.47346181817764e-17	1.71809863593199e-18	1.26866744168096e-19	1.22020560540177e-16	6.00264879868597e-17	7.29623632017641e-17	4.4411524173631e-17	1.08726078761429e-17	2.52653788975968e-17	7.39338280029091e-17
2008211	20	2.17661039787141e-17	4.0012464798482e-17	5.66778747969585e-17	2.15525093946128e-17	8.33247729217372e-18	4.52269495781258e-17	1.99519192206209e-17	1.41338631343674e-17	1.95550714089912e-17	2.24243736609193e-17	1.60429428574656e-18	1.08750860642884e-19	1.22256151546965e-16	4.56639433761971e-17	8.03052118757723e-17	4.39751070425228e-17	1.25177795444257e-17	2.55868677981237e-17	6.60820008330658e-17
2008211	21	1.98767486933424e-17	3.57219151771261e-17	5.48810093735232e-17	2.00731995820036e-17	7.85211114641813e-18	4.56656769884421e-17	1.75906448092983e-17	1.19915321192675e-17	1.65142918650176e-17	2.06921895320668e-17	1.54077548545239e-18	1.32955026114114e-19	1.04903979138176e-16	3.67444132569694e-17	7.7902840409362e-17	4.39558159633646e-17	1.44266141656375e-17	2.53303372557373e-17	6.32829709236773e-17
2008211	22	1.79221484219983e-17	3.21302839797629e-17	5.3837633133951e-17	1.99643687781269e-17	7.84796178809966e-18	4.56665476329241e-17	1.51617323776896e-17	1.05625641563735e-17	1.37194272793437e-17	1.84084952527361e-17	1.57591877201746e-18	3.11636967608215e-18	1.10580881946555e-16	3.12043582451951e-17	7.15019705488441e-17	4.41390718118419e-17	1.70971017734818e-17	2.30614991795179e-17	6.1916811525847e-17
2008211	23	1.65572989807504e-17	3.02580400297688e-17	5.3398901999239e-17	2.06686696465863e-17	7.96672320870086e-18	4.55582146567577e-17	1.34385911584515e-17	9.7501196692651e-18	1.19092730311648e-17	1.65910074332446e-17	1.77289194320971e-18	1.18965982082327e-16	1.03332216222488e-16	2.81682275087754e-17	6.61447673523669e-17	4.44182879315264e-17	2.02528954836556e-17	1.91043597794143e-17	6.0010512937966e-17
2008212	0	1.55684878873629e-17	3.01266394564618e-17	5.32368680023085e-17	2.20395988119883e-17	8.43206586573237e-18	4.54886544221038e-17	1.25938301957622e-17	9.33359868657676e-18	1.09508161725754e-17	1.56500770160607e-17	2.1384957321876e-18	1.20180359997166e-16	1.04034987931252e-16	2.63865646867446e-17	6.12590969758452e-17	4.47130179427257e-17	2.36755525651166e-17	1.57858549253935e-17	5.91774205470141e-17
2008212	1	1.45198240451875e-17	3.09170918754043e-17	5.35038057401122e-17	2.41449808633243e-17	9.32853829652343e-18	4.53626751561734e-17	1.22926069714046e-17	9.28846454940527e-18	1.06738254362545e-17	1.52428779672113e-17	2.58376676919808e-18	1.19551531126585e-16	1.07281500911005e-16	2.54109372480509e-17	5.57847587936884e-17	4.50365860052772e-17	2.64141275358051e-17	1.37024269937285e-17	5.87116539495165e-17
2008212	2	1.41830323216551e-17	3.2171168308307e-17	6.33400578655619e-17	2.63721842529937e-17	1.06723353801347e-17	4.52073693636227e-17	1.20907509986594e-17	9.58227579101204e-18	1.08524943100805e-17	1.42438761135148e-17	3.25684207197989e-18	1.16476065987464e-16	1.0859478016294e-16	2.4080779433054e-17	5.13571520418463e-17	4.54524383570335e-17	2.80039889333724e-17	1.23933195483164e-17	5.80974336746397e-17
2008212	3	1.49313388134895e-17	3.34112735012508e-17	6.3895741692852e-17	2.89447719164387e-17	1.23703880918146e-17	4.50678987065927e-17	1.1545206529082e-17	1.01717312636163e-17	1.07507012345933e-17	1.31374505188707e-17	7.17372421744572e-18	1.09416912440975e-16	1.22451203326014e-16	2.27284713225476e-17	4.77809156174622e-17	4.58933813667548e-17	2.75275569693736e-17	1.15844088193264e-17	5.78686084350603e-17
2008212	4	1.95156075878901e-17	3.45561894839888e-17	6.37389788893445e-17	3.20729290900699e-17	1.45404036463081e-17	4.47615058150277e-17	1.0982445235768e-17	1.11339173051162e-17	1.08358809398539e-17	1.24602547987177e-17	2.05966532748333e-17	1.06229262668894e-16	1.2231866210855e-16	2.17047088104362e-17	4.54490664684101e-17	4.63090418251683e-17	2.63472673365229e-17	1.10997673666797e-17	5.82705539664331e-17
2008212	5	3.91262610027336e-17	3.55283086620022e-17	6.43159924462316e-17	3.52077847124442e-17	1.71584401580423e-17	4.42247964975944e-17	1.02334290808037e-17	1.25372460803863e-17	1.10615458541785e-17	1.13657379044624e-17	4.36800378529555e-17	1.06699642341843e-16	1.22103347952481e-16	2.1209443418995e-17	4.53209775915063e-17	4.64215725185966e-17	2.58663880893631e-17	1.08190533581175e-17	5.88596265973908e-17
2008212	6	4.30863014801705e-17	3.6173766030138e-17	6.93263152201296e-17	3.73663218558993e-17	1.99902323191785e-17	4.33174304623631e-17	1.00959921913085e-17	1.4267370439535e-17	1.09200329686488e-17	1.1479807004113e-17	6.7097487313264e-17	1.07142603525781e-16	1.22666618820539e-16	2.11112545494999e-17	5.09497594751585e-17	4.96950455660122e-17	2.66553226788226e-17	1.05998350714837e-17	5.88018327409831e-17
2008212	7	1.03197832260201e-16	3.64829142983332e-17	7.64382015778888e-17	3.90257890496824e-17	2.26524174244401e-17	4.3124186879657e-17	1.03740191089278e-17	1.6236531911076e-17	1.11187515639887e-17	1.18866477171779e-17	8.3494631979195e-17	1.07212126239298e-16	1.22748441169252e-16	2.17112591183172e-17	5.99263382853321e-17	5.56501303225053e-17	3.07382189293606e-17	1.04001991853512e-17	7.06096998715761e-17
2008212	8	5.09073597026763e-17	3.71914905307169e-17	1.22400213638861e-16	4.05124717035028e-17	2.47115414036764e-17	4.29609516529748e-17	1.10842522289353e-17	1.82587287823854e-17	1.15894785642566e-17	1.17294385134869e-17	9.25290539048798e-17	1.07550109806478e-16	1.22564961038451e-16	2.85041406630604e-17	6.24163499386453e-17	5.65484249129826e-17	4.05876878952173e-17	1.06530575304388e-17	7.72752880112883e-17
2008212	9	5.97281033480771e-17	3.77738270702015e-17	1.22249196281953e-16	4.2297962607682e-17	2.625672077803e-17	4.4278893247379e-17	1.31203489169097e-17	2.02558422496464e-17	1.24112294291426e-17	1.29852010856155e-17	9.63195596049767e-17	7.52823430721378e-17	1.22349726960752e-16	3.76245122085037e-17	5.69378003057991e-17	5.39550665130734e-17	4.50926721276266e-17	1.14870454383033e-17	7.56159284054606e-17
2008212	10	5.59119809517703e-17	3.88741447848202e-17	1.1257373041207e-16	4.29880519423942e-17	2.74516429001606e-17	4.56571380687393e-17	1.57230183384277e-17	2.23136557252638e-17	1.37367765613745e-17	1.46194132265422e-17	9.61813397286074e-17	4.06809081051691e-17	1.21837221991004e-16	4.25577372255792e-17	5.29328947652036e-17	5.52881156963871e-17	4.49473265529721e-17	1.27281413989152e-17	7.31579699593957e-17
2008212	11	4.06407612713255e-17	4.0679936267156e-17	1.06998662411132e-16	4.25382474308883e-17	2.87113272910652e-17	4.5756121259355e-17	1.59719529830068e-17	2.3938686902837e-17	1.51125330944258e-17	1.57919968279818e-17	9.49315921667098e-17	2.2459958689072e-17	9.5079683131717e-17	4.37573099508591e-17	4.96000616635895e-17	5.4570878856198e-17	4.36573543452758e-17	1.45781079732336e-17	7.04111592051044e-17
2008212	12	3.10120944585365e-17	4.14904121406653e-17	1.01765557448171e-16	4.24337741301866e-17	3.01911875022681e-17	4.47720927598839e-17	1.56037593911103e-17	2.51151589810844e-17	1.68395304485198e-17	1.6088099424444e-17	9.40388155511173e-17	1.35397845857618e-17	6.44861598427045e-17	4.46997246729014e-17	4.61053096403485e-17	5.43508949952332e-17	4.30848345770893e-17	2.44583510693987e-17	7.05423180577519e-17
2008212	13	2.63469702302423e-17	4.17823129592188e-17	9.55718689127536e-17	4.33993425722436e-17	3.14848820836911e-17	4.39842614313357e-17	1.55563396012064e-17	2.60201434411288e-17	1.80767033311201e-17	1.56842912995855e-17	9.34184851601525e-17	8.06975104712016e-18	4.78292034098788e-17	4.48582845208188e-17	4.37573583558438e-17	5.29812096653309e-17	4.26546828534017e-17	4.41226486251327e-17	7.12719778773551e-17
2008212	14	2.43507292234896e-17	4.5241385096623e-17	8.71644339398669e-17	4.31670523199883e-17	3.23856199963655e-17	4.34080507212923e-17	1.59258106165807e-17	2.67436687599247e-17	1.8897362591333e-17	1.49215912876528e-17	9.18596789635973e-17	4.46887272571208e-18	3.84370162700176e-17	4.20387041282023e-17	4.18945203258799e-17	5.12722265093835e-17	4.18248250827909e-17	5.52259215675503e-17	7.21524579655879e-17
2008212	15	2.3810326181319e-17	4.76287508254553e-17	7.98376023785645e-17	4.16249423459053e-17	3.31683089073714e-17	4.27504418142203e-17	1.67106043493489e-17	2.74358258571499e-17	1.91578551794399e-17	1.46256684594787e-17	8.73898987007176e-17	2.77733252548241e-18	3.16979835363026e-17	3.89436921531674e-17	4.06658863421665e-17	4.94309564752666e-17	4.11307627569212e-17	6.11278490874657e-17	7.01570110129303e-17
2008212	16	2.38744434524783e-17	4.62643428082725e-17	7.27636365414615e-17	4.0008782419843e-17	3.40555631234846e-17	4.21008026177683e-17	1.79322957415749e-17	2.82014177938386e-17	1.90156768183901e-17	1.48293566631618e-17	8.17081501405247e-17	2.299397231155e-18	2.69537501717373e-17	3.68760819008597e-17	1.18225578158201e-16	4.74583570899246e-17	3.99702566999842e-17	6.80239311172422e-17	6.63949016891067e-17
2008212	17	2.40284363297486e-17	4.45283012043173e-17	6.65281133963202e-17	3.82837637297151e-17	3.45806058449553e-17	4.12438115801707e-17	1.92614638754016e-17	2.90390802596714e-17	1.87771218996312e-17	1.55315171928801e-17	7.71359176117438e-17	2.37005431820615e-18	2.31094653090728e-17	3.56582725545962e-17	1.22654285087924e-16	4.49659490890884e-17	3.84207416457337e-17	7.22852490438e-17	6.25234028418742e-17
2008212	18	2.41376710680983e-17	4.32191261954416e-17	6.10052489169351e-17	3.66014603192211e-17	3.47039506685025e-17	4.01404914639512e-17	2.04054095611573e-17	3.02497932880462e-17	1.90438557000386e-17	1.65778819229602e-17	7.38057813333979e-17	2.64081454520006e-18	1.99514925641424e-17	3.47487548646768e-17	1.11409505297694e-16	4.23659965457946e-17	3.65537463379013e-17	7.36453182762615e-17	5.65791475899054e-17
2008212	19	2.44809733060561e-17	4.12456856766012e-17	5.5940702873803e-17	3.54036695371694e-17	3.43746295340013e-17	3.90932353593572e-17	2.13676249937281e-17	3.1375784917795e-17	2.05011011762379e-17	1.79277125723982e-17	7.08837878411224e-17	2.91575373034453e-18	1.79570520537955e-17	3.38469230573128e-17	9.33428704637176e-17	4.06207868839892e-17	3.46530546557111e-17	7.06222365752388e-17	5.0554230556729e-17
2008212	20	2.51209624137727e-17	3.9311244718239e-17	5.26966764941708e-17	3.52788436139778e-17	3.43921353446439e-17	3.88506981911666e-17	2.20433625605538e-17	3.23234297929608e-17	2.19691840513948e-17	1.92495976913008e-17	6.82566371435911e-17	3.13250302903103e-18	1.69472803427987e-17	3.26040047105974e-17	8.72931687796315e-17	3.92115993156578e-17	3.29963962094718e-17	6.24116388732076e-17	4.69049534469065e-17
2008212	21	2.59325594074337e-17	3.80728330227827e-17	5.09504222850963e-17	3.5944197019847e-17	3.42808160032762e-17	3.87919588617307e-17	2.2701810581e-17	3.29262301513221e-17	2.21879578377465e-17	2.05370399153258e-17	6.5200587398634e-17	3.28048285970163e-18	1.63538223022028e-17	3.19079967745592e-17	8.3398056465543e-17	3.86540797064531e-17	3.14531709183625e-17	5.2050902382913e-17	4.44889902714136e-17
2008212	22	2.6765205894468e-17	3.73718901351927e-17	5.16626231397913e-17	3.7637338871375e-17	3.40827909832931e-17	3.89884892156338e-17	2.35679324855524e-17	3.26165427437435e-17	2.30942651958398e-17	2.20759299077962e-17	6.23155103596348e-17	3.40244279399009e-18	1.58958496473266e-17	3.19437703806232e-17	8.11036306773691e-17	3.86000463448689e-17	3.01464569750361e-17	4.10387165510787e-17	4.42047490858506e-17
2008212	23	2.77265039748702e-17	3.70094687716875e-17	5.19704723020866e-17	3.94094779018739e-17	3.37241610834516e-17	3.92006091019479e-17	2.48946620944734e-17	3.25450363932517e-17	2.50440945188833e-17	2.38947248929839e-17	5.92815277711285e-17	3.52169245941086e-18	1.56665572002273e-17	3.24754764749057e-17	8.19628478755187e-17	3.88779812293004e-17	1.15585433234133e-16	3.25071883637595e-17	4.56038915015305e-17
2008213	0	2.87267839489143e-17	3.70931487788708e-17	5.17154314328577e-17	3.97190251194407e-17	3.33715790428897e-17	3.96486754751144e-17	2.65867193215811e-17	3.23745182250147e-17	2.65753786927923e-17	2.52933874263689e-17	5.60290086121048e-17	3.66102133251926e-18	1.57695729984406e-17	3.36648512114857e-17	7.99886911032958e-17	3.94038081122622e-17	1.14974783101575e-16	2.76739782694632e-17	4.77214018758397e-17
2008213	1	2.94635501087326e-17	3.7498405022545e-17	5.17345844739331e-17	3.95342666489699e-17	3.32891619881435e-17	4.00894909676263e-17	2.81441150242408e-17	3.22031227304733e-17	2.7509319782928e-17	2.66350147638264e-17	5.3555762307764e-17	3.74313588472045e-18	1.6029657109234e-17	3.78876464254762e-17	7.52860185402275e-17	4.01123729168014e-17	1.14889079215085e-16	2.56413705414949e-17	5.04203885747717e-17
2008213	2	2.9874648142381e-17	3.79170477734995e-17	5.27231409001614e-17	3.95631145342188e-17	3.32894260677036e-17	4.0618910309251e-17	2.98551514159431e-17	3.21897789399758e-17	2.7650491606668e-17	2.8095702774623e-17	5.16269061194957e-17	3.75278737720856e-18	1.64550158496758e-17	4.61197249456959e-17	7.01510610814049e-17	4.09025067632597e-17	1.15862244229505e-16	2.50476199878398e-17	5.28643705309814e-17
2008213	3	3.02294079844923e-17	3.82416328797445e-17	5.30865501680996e-17	3.98739377948258e-17	3.31995789009882e-17	4.13174632215294e-17	3.19306448486477e-17	3.24535445030366e-17	2.71559435049923e-17	2.96968028952567e-17	5.0207312629019e-17	3.68495570492376e-18	1.71038075860223e-17	5.36504994296295e-17	6.61984620031733e-17	4.16317953306719e-17	7.88346685067199e-17	2.48112524593918e-17	5.47794445670035e-17
2008213	4	3.06834531934614e-17	3.83828382089956e-17	5.26856122159074e-17	4.0610234236438e-17	3.30760963223748e-17	4.21411500074208e-17	3.44783106257229e-17	3.29289252049983e-17	2.65773079169912e-17	3.1441834658724e-17	4.90871519896092e-17	3.59666143442878e-18	1.80055847892505e-17	5.93723716666981e-17	6.30064167256536e-17	4.21451173120202e-17	4.55712736485621e-17	2.45586351723503e-17	5.69207256301348e-17
2008213	5	3.11347211170572e-17	3.83241115382444e-17	5.30220066638886e-17	4.15356716867215e-17	3.2642752669495e-17	4.28249746756663e-17	3.69931149959429e-17	3.33313747936905e-17	2.65458996718186e-17	3.35425782534156e-17	4.80202571430166e-17	4.88273798091199e-18	1.89271896009693e-17	6.72678365126741e-17	6.16369899674388e-17	4.22866573940362e-17	3.32984511362529e-17	2.42232991685131e-17	6.32076236520274e-17
2008213	6	3.18041947606661e-17	3.82268317715691e-17	5.73723238546716e-17	4.24289770322729e-17	3.23494416819819e-17	4.31190080305179e-17	3.88172659429023e-17	3.34836924469876e-17	2.73970808639808e-17	3.57895935885392e-17	4.69218458967882e-17	6.53959630886632e-18	1.96711893122869e-17	6.8899007692726e-17	6.49226787566631e-17	4.54682126101759e-17	2.85340154061491e-17	2.37052591854944e-17	6.55895492080031e-17
2008213	7	3.23318149517931e-17	3.81399104481563e-17	6.19158198509664e-17	4.36745345839444e-17	3.28593364603607e-17	4.46754299711576e-17	4.03615806950249e-17	3.35210986922511e-17	2.8346211629277e-17	3.70025773056475e-17	4.5893338045069e-17	8.00991535566954e-18	2.09067878975571e-17	7.49834754217167e-17	7.04468328926567e-17	4.68116999235782e-17	2.72105560194367e-17	2.31253712252159e-17	6.65173152906537e-17
2008213	8	3.26015057555037e-17	3.85604564359497e-17	6.38614365423856e-17	4.6294982339133e-17	3.31291579763103e-17	4.5666075848063e-17	4.04253904663106e-17	3.36247018293625e-17	2.98326513509208e-17	3.74901808563787e-17	4.50271807131566e-17	9.35326188498209e-18	1.17239276463592e-16	1.23179970549636e-16	9.5347955715069e-17	5.09676522623107e-17	2.92047322361619e-17	2.32265994382369e-17	7.04508482658074e-17
2008213	9	3.32004466460726e-17	3.92071337900937e-17	1.23307534844907e-16	4.62995111853879e-17	3.30812396312977e-17	4.8844395631628e-17	3.96392681982048e-17	3.38013706355924e-17	3.17712893622103e-17	3.74028853626091e-17	4.42432572569492e-17	1.17233146077569e-17	8.73737837791919e-17	1.23056216850265e-16	8.73100509041767e-17	4.92427852803199e-17	2.9563092862336e-17	2.3865304120365e-17	7.27717365427954e-17
2008213	10	3.40265385283415e-17	4.14656736655304e-17	1.18291420690893e-16	4.46065439499492e-17	3.39978197957205e-17	4.96898943339502e-17	3.86397499080644e-17	3.46398713824709e-17	3.49260898146309e-17	3.68113771755859e-17	4.34871787550618e-17	1.5633044896865e-17	7.9313279616383e-17	1.20807683231555e-16	7.74151319126619e-17	4.71174156233981e-17	2.82801571289114e-17	2.52842921046692e-17	7.6329540708891e-17
2008213	11	3.4438315067595e-17	4.22524441437379e-17	1.12685323187156e-16	4.36405076369823e-17	3.67932039441733e-17	4.72764547879116e-17	3.83145944994684e-17	3.50033564132745e-17	3.86917875641771e-17	3.59375425654613e-17	4.3000711222006e-17	2.06333405959699e-17	7.82883976751424e-17	1.14452416845364e-16	7.01111053310891e-17	4.69763701201225e-17	2.6877016585893e-17	2.66714686571438e-17	7.42997451791836e-17
2008213	12	3.50176689321532e-17	4.2419422050316e-17	1.03549890596261e-16	4.29147133835564e-17	4.26099898318809e-17	4.475988969002e-17	3.90851872253566e-17	3.60937712517433e-17	4.13843994354178e-17	3.50736503460312e-17	4.30463382067219e-17	2.25450391527256e-17	6.47345642571643e-17	1.15478903233499e-16	6.39711514332818e-17	4.72439602735451e-17	2.61004537796544e-17	2.76507453321757e-17	7.01005019681028e-17
2008213	13	3.50094550121296e-17	4.25606000603076e-17	9.5817244643728e-17	4.20703502276513e-17	4.93900444344857e-17	4.38190850080686e-17	4.01735456176712e-17	3.86021427233988e-17	4.27785641542321e-17	3.47795277802038e-17	4.37815766598117e-17	2.23763127441995e-17	5.09018463297487e-17	1.13685784738794e-16	7.4264349629892e-17	4.75301710584658e-17	2.59278993536602e-17	2.78617375111829e-17	6.59176110049786e-17
2008213	14	3.48058159562427e-17	4.20736759887875e-17	8.76245280274171e-17	4.05167951794611e-17	5.34663287602312e-17	4.29459524104259e-17	4.09822490047547e-17	4.19710052717427e-17	4.2360530129443e-17	3.4745696428052e-17	4.52024592965667e-17	2.12785314584244e-17	4.21363471358505e-17	1.18301965282982e-16	1.17870349782215e-16	4.65550135442197e-17	2.64893035236611e-17	2.75593344115633e-17	6.39251753104811e-17
2008213	15	3.44241978073691e-17	4.13742877608842e-17	7.98614064482217e-17	3.91379230146374e-17	5.27125348319906e-17	4.20749096852787e-17	4.07839518764156e-17	4.51771964161194e-17	4.03845247006348e-17	3.46231914458289e-17	4.69525931423098e-17	2.15586473230287e-17	3.6744983592562e-17	1.22391246464876e-16	1.18999306386934e-16	4.59015356186492e-17	2.74981376758643e-17	2.66511278419061e-17	6.31883483250542e-17
2008213	16	3.40414074448617e-17	4.07024579278182e-17	7.49765435325506e-17	3.80896509786336e-17	5.05632895921184e-17	4.13225199307294e-17	3.94354183658923e-17	4.68080611721573e-17	3.82627853842854e-17	3.44749800222325e-17	4.84784686503967e-17	2.49327126544782e-17	3.29713500333306e-17	1.1775380027743e-16	1.1819432744325e-16	4.60795172652618e-17	2.84360848648593e-17	2.55160243630806e-17	6.77043919617633e-17
2008213	17	3.3837866325395e-17	3.98657754588092e-17	6.93516379737731e-17	3.71047789782677e-17	5.49771010317964e-17	4.02920471745666e-17	3.70415778273438e-17	4.5989097320456e-17	3.62488512268078e-17	3.4028884852385e-17	4.95612813001185e-17	4.05323118650656e-17	3.00700923667977e-17	1.20500336306682e-16	1.19045275286674e-16	4.64311173068212e-17	2.8937938739502e-17	2.60690108318465e-17	7.60063431710884e-17
2008213	18	3.43199934429334e-17	3.92649472699325e-17	6.4719756685869e-17	3.64242154169474e-17	5.0930704045005e-17	3.96001248925749e-17	3.39808962423831e-17	4.33969914515387e-17	3.44922110285776e-17	3.30493505904637e-17	5.01350989640851e-17	5.14149500929553e-17	2.73420164989627e-17	1.02664653188755e-16	1.11995181066524e-16	4.57537368772992e-17	2.89178559143723e-17	2.79973155735793e-17	8.18978284961833e-17
2008213	19	3.51283485571458e-17	3.85679556279646e-17	5.87312512349258e-17	3.60755931790783e-17	3.83409091306077e-17	3.9461197072021e-17	3.11320035608913e-17	4.14838293853013e-17	3.286187326335e-17	3.21432747393986e-17	5.02948249532292e-17	5.524506167296e-17	2.55557700926588e-17	8.60392586069896e-17	9.04416116506111e-17	4.49581201952429e-17	2.87264538931631e-17	2.98585376236549e-17	8.21456508620004e-17
2008213	20	3.55916909684791e-17	3.78366700721552e-17	5.511630825917e-17	3.62482869561845e-17	2.99465914354418e-17	3.95915459511955e-17	2.87971462866834e-17	3.96682277123319e-17	3.06241481682186e-17	3.1254716363576e-17	5.01296575386424e-17	5.64662333589243e-17	2.44333639203653e-17	7.28614299034741e-17	8.47856632939752e-17	4.43255779538605e-17	2.87089173730964e-17	3.09592223661759e-17	7.80079947152457e-17
2008213	21	3.54989194135346e-17	3.72221556720267e-17	5.26565163294283e-17	3.68176299925707e-17	2.71754450801297e-17	3.96356602333057e-17	2.70360541285754e-17	3.61404300101868e-17	2.85086336993319e-17	3.03770727843516e-17	4.96145139673643e-17	5.75491694563583e-17	2.38825632269376e-17	6.20311398641276e-17	8.24142973673534e-17	4.39815899052055e-17	2.87365205388418e-17	3.141212135794e-17	7.50191832492566e-17
2008213	22	3.53707097552347e-17	3.72198605207091e-17	5.0811286422068e-17	3.83840137056983e-17	3.09684077946356e-17	3.95679199297335e-17	2.57075393320556e-17	3.14108453365164e-17	2.7039310006551e-17	2.93030177819249e-17	4.88532198532392e-17	5.67033398321409e-17	2.37731786323141e-17	5.41829456969945e-17	8.63801403622449e-17	4.44783080939766e-17	2.91550635365117e-17	3.10295735754168e-17	7.30189884922837e-17
2008213	23	3.5074137564065e-17	3.74966297319982e-17	4.91228754311497e-17	4.05332932594428e-17	3.37943715842477e-17	3.96766287173337e-17	2.47707213528332e-17	2.96953819546839e-17	2.65735708982084e-17	2.79580288905154e-17	4.78966249472482e-17	4.87525851394125e-17	2.36701047948571e-17	4.85354137151572e-17	8.7018461787814e-17	4.49260498214691e-17	3.06465837840715e-17	2.80346226780196e-17	7.17213144830187e-17
2008214	0	3.41150856699214e-17	3.80898031511358e-17	5.77340145434369e-17	4.28556365633429e-17	3.48819911978988e-17	3.95251856510494e-17	2.39901957099311e-17	3.73299744514778e-17	2.70159440922546e-17	2.65827132603665e-17	4.66580091623562e-17	3.7339278074826e-17	2.37400467720433e-17	4.44473911361773e-17	8.26744749858093e-17	4.49850312008718e-17	1.13766636633946e-16	2.64527238419144e-17	7.0553654004322e-17
2008214	1	3.27643105529307e-17	3.88361470981959e-17	5.65121459442475e-17	4.49862070581039e-17	3.96296209677324e-17	3.95262987069265e-17	2.33909893174283e-17	4.53211073427833e-17	2.78175583745556e-17	2.53697668476604e-17	4.53774507453245e-17	2.76358179409947e-17	2.37680757153103e-17	4.14505660438329e-17	7.79067792342971e-17	4.48044153881786e-17	7.98593494590394e-17	2.59499601806718e-17	6.95880823408467e-17
2008214	2	3.19893648879571e-17	3.92846136751289e-17	5.53287413535323e-17	4.66759698968063e-17	4.53042484930186e-17	3.95522808479608e-17	2.35415068098994e-17	4.51695273024025e-17	2.87832484863893e-17	2.44338973318743e-17	4.42391452965224e-17	2.2754887152123e-17	2.38090044136087e-17	3.91407722717858e-17	7.37581175691585e-17	4.45264136978824e-17	5.18026453238947e-17	2.59882660605663e-17	6.93458821734935e-17
2008214	3	3.29923345442787e-17	3.95174335569698e-17	5.3979895147921e-17	4.78131273983627e-17	4.94839632396378e-17	3.9414782419615e-17	2.61207015949391e-17	4.19725528169683e-17	3.09462174523342e-17	2.43533554528468e-17	4.47774908820806e-17	2.09960149886544e-17	2.38522173669616e-17	3.72952940199694e-17	7.04461705671547e-17	4.36444760027443e-17	5.57653651988937e-17	2.66086747687408e-17	6.89099529680701e-17
2008214	4	3.5118310632633e-17	3.96923736072299e-17	5.30463903509478e-17	4.84416554746677e-17	5.23829446668161e-17	3.95462298737252e-17	3.10244717389526e-17	4.11110860552988e-17	3.59152353584643e-17	2.66306345241757e-17	4.40395594536292e-17	2.14118961536294e-17	2.39377550195492e-17	3.57353718712405e-17	6.83513515842012e-17	4.26068770353102e-17	6.3466262241511e-17	2.7710552875474e-17	6.77062712957549e-17
2008214	5	4.0693551933648e-17	3.96876967464139e-17	5.6498007630242e-17	4.85303473854111e-17	5.40911053751031e-17	3.99608211766493e-17	3.80955574140414e-17	4.21071388944648e-17	4.10856804948691e-17	3.14647100504057e-17	4.50218218845312e-17	2.36145051911844e-17	2.40096568170762e-17	3.64773418343273e-17	6.66442097411338e-17	4.20891169927338e-17	6.54789362218047e-17	2.92604663035861e-17	6.68430860874538e-17
2008214	6	4.43726513709539e-17	3.92926004898786e-17	6.05566812077323e-17	4.82450572956875e-17	5.46026663597252e-17	4.12126536648229e-17	4.45805737930718e-17	4.42285599525051e-17	4.59115149382022e-17	3.96287312109478e-17	4.62434405805454e-17	2.71693479784362e-17	2.47602129763332e-17	3.77620144674953e-17	6.48176789944484e-17	4.50255161998649e-17	6.72783461400285e-17	3.12838017086911e-17	9.11525246349205e-17
2008214	7	4.33484812834521e-17	3.93225858516868e-17	6.02529096598866e-17	4.76858243491415e-17	5.45081243086312e-17	4.40115501558783e-17	4.94053200036603e-17	4.61449116365236e-17	4.86213215968864e-17	4.5818664187878e-17	4.87167928100304e-17	3.12279988792619e-17	2.59380586698455e-17	3.98586558116903e-17	6.29414575779232e-17	4.68801866208893e-17	7.20720670559839e-17	3.31774004517579e-17	9.68467071635207e-17
2008214	8	4.19550726200644e-17	3.89402110934675e-17	5.34165490033825e-17	4.77039589851978e-17	5.38000999920276e-17	4.57904471604553e-17	5.06785672002199e-17	4.73345914037501e-17	5.34448678778464e-17	4.91466377658192e-17	4.95927652883615e-17	3.56142790506479e-17	1.21910764499979e-16	4.47688844214457e-17	6.30455091490745e-17	4.77307157963924e-17	7.84604347743087e-17	3.77980783817428e-17	8.5096881490603e-17
2008214	9	4.1221527760723e-17	4.0472520203765e-17	5.4574989169648e-17	4.8669785364881e-17	5.28350566345542e-17	4.95247402625676e-17	5.32460335861046e-17	4.79202338542173e-17	5.19072427892632e-17	5.01915167481739e-17	5.0994586767354e-17	4.08465896962171e-17	1.03465788630808e-16	5.00465275834431e-17	7.95037700080429e-17	5.66097147949334e-17	8.72209387272672e-17	4.28060643435267e-17	8.45972616276581e-17
2008214	10	4.17160189136443e-17	4.36242790446798e-17	1.22720935434638e-16	4.93312862573367e-17	5.1965088376889e-17	5.38129950331069e-17	5.44055202177534e-17	4.8244547316492e-17	5.41604181495046e-17	5.00749658356968e-17	5.31019602620346e-17	4.64706735194296e-17	8.95241770097348e-17	5.38956677618675e-17	7.94572422851853e-17	6.29262256138091e-17	8.9163879596937e-17	4.64357320499347e-17	8.01607481306266e-17
2008214	11	4.19885632565951e-17	5.05399257942024e-17	1.18681714449613e-16	4.77078901814163e-17	5.15101438950059e-17	5.41191690174052e-17	5.49700942940944e-17	4.84921058460715e-17	6.15465499626372e-17	4.92503622809672e-17	5.8228775331641e-17	5.17343540155943e-17	5.5773015305461e-17	1.2284578984578e-16	7.5184645156607e-17	6.49591969865653e-17	8.37612297259143e-17	4.82657103372875e-17	7.85720736319811e-17
2008214	12	4.17724516468454e-17	8.21766799954759e-17	9.07136532510115e-17	4.8844304001924e-17	5.04387748649999e-17	5.48391142959811e-17	5.4261492967825e-17	4.81017018808563e-17	6.74342471662712e-17	4.77894986281314e-17	6.54463202920302e-17	2.87294912982491e-17	4.1457468134114e-17	1.17232954115879e-16	7.0874225868539e-17	6.47444229866844e-17	7.68905314748485e-17	4.77326800358123e-17	7.36613262775102e-17
2008214	13	4.13361058372439e-17	1.14270655261348e-16	1.01160511096197e-16	4.89954126851822e-17	4.93570842789239e-17	5.44352908258231e-17	5.21250237429038e-17	4.73846213831198e-17	6.96886320477994e-17	4.60599874426925e-17	7.25456722485112e-17	8.25912924084754e-18	3.83723547423579e-17	1.05660706059658e-16	6.68788375550987e-17	6.86372873882942e-17	7.09028975406245e-17	4.82237620048208e-17	9.62223658115819e-17
2008214	14	4.06613018444582e-17	1.14981964438343e-16	1.20782842853243e-16	4.88429244198201e-17	4.84266271051116e-17	5.42883735041534e-17	5.00029380507836e-17	4.64293238988597e-17	6.75294046602282e-17	4.44654108825626e-17	1.11777720469706e-16	7.99237906328967e-17	3.84777089244236e-17	9.37033198185533e-17	6.36022169334449e-17	7.08062271427788e-17	6.65646316450162e-17	4.90787901087913e-17	8.45074356307102e-17
2008214	15	3.96068016611213e-17	1.11390316986424e-16	1.21388013606383e-16	4.8326855787896e-17	4.83472315652153e-17	5.3878150582759e-17	4.8192978584152e-17	4.557263868603e-17	6.28305171721381e-17	4.34765598434165e-17	1.12269401049163e-16	1.02497603317845e-17	3.9709781117321e-17	8.32363373593154e-17	6.21412199726059e-17	7.05131823518565e-17	6.30992043865635e-17	4.94160996418184e-17	8.18649460690174e-17
2008214	16	3.94335694268145e-17	1.1922589332137e-16	1.21472672800298e-16	4.79363309860148e-17	5.02091358368082e-17	5.2732017882851e-17	4.71720858444479e-17	4.52405623486074e-17	5.79493654397776e-17	4.30187037017675e-17	1.17968171064052e-16	1.2822957817661e-17	3.93707814088497e-17	7.47774010088008e-17	5.96039788352475e-17	6.87466164197959e-17	6.03910871529792e-17	4.9172131569963e-17	8.06050542983366e-17
2008214	17	4.16864392959201e-17	1.17855014318864e-16	1.16492722065311e-16	5.05216751738772e-17	5.21739937332815e-17	5.16049354809688e-17	4.66245675140247e-17	4.66068566484023e-17	5.47127098238241e-17	4.26585545937448e-17	1.19924122398926e-16	1.22838425425368e-16	3.75301164603962e-17	6.99573084214222e-17	5.60253972231636e-17	6.77593542567495e-17	5.77626146125873e-17	4.87619580956148e-17	7.78298981701823e-17
2008214	18	1.18932181175871e-16	1.20758866322891e-16	1.15736693317466e-16	5.18071317438347e-17	5.28228931071361e-17	5.05570897910187e-17	4.65420593439256e-17	5.05166772795631e-17	5.31604612452099e-17	4.24771836869955e-17	1.20036344811559e-16	1.22859374552609e-16	3.63249735996385e-17	7.11900750525538e-17	5.30137126124477e-17	6.47689150872908e-17	5.47596507261553e-17	4.77384623053192e-17	7.39425195755804e-17
2008214	19	1.16640660053241e-16	1.20795936404219e-16	1.02725445209133e-16	5.15147134128531e-17	5.29682434818124e-17	4.81507971630991e-17	4.65352420923916e-17	5.70014382447182e-17	5.26697333381051e-17	4.24206573099756e-17	1.20075363938495e-16	1.22629030597392e-16	3.6491986724453e-17	7.93615557372996e-17	5.0596752943135e-17	6.07003664201369e-17	5.27191308570383e-17	4.78515387396545e-17	8.1287197999376e-17
2008214	20	1.16110001353176e-16	1.20802093971282e-16	8.93769211202146e-17	5.09473776096075e-17	5.33394215614269e-17	5.15023604496405e-17	4.70117780994574e-17	6.27622202222543e-17	5.42353481006232e-17	1.13164754997607e-16	1.17065918198353e-16	1.22576810671533e-16	3.69631530484194e-17	8.48264052827667e-17	5.11792635788376e-17	5.75938089435519e-17	5.19684346101547e-17	4.88986015845573e-17	7.87469207136668e-17
2008214	21	9.9827410082758e-17	1.15938585715013e-16	7.89843906847855e-17	5.06185077992962e-17	5.310331390291e-17	5.59020002216011e-17	6.94779191806924e-17	6.67660322885774e-17	5.67864115838956e-17	1.09470590900652e-16	1.2212119370946e-16	1.22322383901254e-16	3.71537799886694e-17	8.74399902106752e-17	5.58635361990584e-17	5.55049497443336e-17	5.11650846585635e-17	5.00577215466142e-17	7.62427984498282e-17
2008214	22	1.08609758014057e-16	1.13258833224654e-16	7.29586187359983e-17	5.04627952660856e-17	5.24665756654359e-17	6.31173370676495e-17	1.10290359037605e-16	6.96590855336701e-17	5.96469136615261e-17	1.08902951601638e-16	1.22594069144476e-16	7.41374681245283e-17	3.66889995838632e-17	8.84855229062696e-17	5.92790009541797e-17	5.44906447591938e-17	5.16060221507475e-17	5.22312406963823e-17	7.2746852973003e-17
2008214	23	9.27512774571178e-17	9.27745581306165e-17	6.7308697012112e-17	5.16240961714991e-17	5.29265116915082e-17	7.50537428386677e-17	8.60999851368666e-17	7.32786054674954e-17	6.0185818185915e-17	1.13872005591423e-16	1.23412089902417e-16	4.79555408063817e-17	3.55979079569007e-17	8.82715258719732e-17	6.13396446622194e-17	5.37944464767522e-17	5.28174349497613e-17	5.50761028858244e-17	7.1449237790216e-17
2008215	0	9.90415818562525e-17	1.06071295900586e-16	6.21250306950641e-17	6.21233958654282e-17	6.45005953154895e-17	9.13482143122918e-17	8.28315061291733e-17	9.19496436424944e-17	5.74669327553237e-17	1.17137272393017e-16	1.23926846900677e-16	3.68550184298981e-17	3.42802616148866e-17	8.5922422443634e-17	6.09631194903268e-17	5.34691960010416e-17	5.455144787538e-17	5.8111532110343e-17	7.03441519225697e-17
2008215	1	1.09718927577098e-16	1.03294141248095e-16	5.90239413469279e-17	1.18188694727309e-16	8.31727580283776e-17	1.04602051635117e-16	1.04704105275267e-16	1.1929223426991e-16	5.5405639605321e-17	1.17627970436722e-16	1.22672103837157e-16	3.020635767042e-17	3.52249054702959e-17	8.33559305053838e-17	5.89061726309665e-17	5.39999242942111e-17	5.62135049880467e-17	5.98160205132838e-17	6.95072859596316e-17
2008215	2	1.09672508609433e-16	1.06376525288386e-16	5.67978463622246e-17	1.10306056954162e-16	1.17957604961764e-16	1.07445104525809e-16	1.08792363490116e-16	1.02822781061501e-16	7.23255078512891e-17	9.73676407056473e-17	1.22414391807036e-16	2.46751341624683e-17	4.14693303161084e-17	8.01437487318311e-17	5.65228251634358e-17	5.46608271567536e-17	5.72419454448209e-17	5.9233751431663e-17	7.04992520746531e-17
2008215	3	1.09388797959997e-16	7.91922558195283e-17	5.46545869819291e-17	1.18581436935563e-16	1.07911790598531e-16	1.03539224994832e-16	1.15848906254524e-16	1.0147295398273e-16	8.68510040498949e-17	1.12202064428078e-16	1.16545538432386e-16	2.07398350173137e-17	1.02593932799506e-16	8.19085989602902e-17	5.42665734794509e-17	5.41955437598533e-17	5.71039287708557e-17	6.06904712585516e-17	7.36566818930163e-17
2008215	4	1.09232515150716e-16	7.27088634041363e-17	5.2794273462103e-17	1.10027632637525e-16	1.19203144957609e-16	1.05034016570635e-16	1.01952484264268e-16	1.05374399104295e-16	6.72570953738644e-17	1.09784003927156e-16	1.15966537453711e-16	1.89223752341017e-17	8.93673966916464e-17	1.22171352668424e-16	5.2187707038941e-17	5.36881818233157e-17	5.56898409827862e-17	1.14947661772033e-16	7.21788778963179e-17
2008215	5	1.08961392000053e-16	6.92921038990063e-17	5.14121257860211e-17	1.01038511943925e-16	1.16578875426925e-16	9.1472076264308e-17	8.64716892045544e-17	9.0613212074128e-17	9.96404167481632e-17	1.09539756500895e-16	1.04181892096308e-16	1.74227803857949e-17	7.16581948478767e-17	1.23413204386387e-16	5.0118235144246e-17	5.38407745421569e-17	5.30239524785432e-17	1.09072085772237e-16	7.16340373793555e-17
2008215	6	1.08628491004227e-16	7.03328385622615e-17	4.96515702836673e-17	9.38099950723438e-17	4.44126628408027e-17	7.87432555130182e-17	1.09842156805686e-16	8.78688376069169e-17	7.98830783802874e-17	1.08465856428045e-16	1.07059541032651e-16	1.61690962820059e-17	1.09316644636752e-16	1.23529496431236e-16	4.92239821650265e-17	5.48852403839813e-17	4.95918784873724e-17	1.085692020737e-16	8.5774389994882e-17
2008215	7	1.08375939888804e-16	7.97074280955799e-17	5.84837250339266e-17	8.30505935143349e-17	2.55306189350008e-17	8.11406148847011e-17	1.0662652198502e-16	8.33663535537243e-17	8.45837848840896e-17	1.07626926026857e-16	1.10529764524887e-16	1.71946426815657e-17	1.01468137376101e-16	1.23359266201053e-16	5.01551752350507e-17	5.53897580242562e-17	4.601252537496e-17	2.52066657949665e-17	1.09675268215621e-16
2008215	8	1.08507592875773e-16	9.65039754445758e-17	1.18798631107285e-16	7.47798516652687e-17	5.01301516637009e-17	7.43840052693025e-17	1.05775290274821e-16	9.3836713971527e-17	8.90712015996868e-17	1.04189128400672e-16	1.15194775302715e-16	1.84938039365729e-17	9.93164770040766e-17	1.23104533669559e-16	5.49401193160654e-17	6.05803301445119e-17	4.34012990189631e-17	5.24623938920817e-17	1.0918617274041e-16
2008215	9	1.08665253695642e-16	9.9543991428951e-17	1.1083684802329e-16	6.86786283235969e-17	7.66149825903321e-17	7.05971465574063e-17	9.19602087825963e-17	1.0714434861085e-16	8.89302542870266e-17	9.94946344268153e-17	1.16498740408449e-16	2.27968723515122e-17	9.39768886135131e-17	1.22580640607813e-16	5.78476081729004e-17	7.05944464835336e-17	4.24915765488245e-17	8.67539317436094e-17	1.08216131165364e-16
2008215	10	1.08210992350052e-16	9.91262274290912e-17	9.82793240385833e-17	6.66381292040281e-17	8.4269145544222e-17	7.01421490948484e-17	8.67712025017135e-17	1.03040920588166e-16	9.16758514770731e-17	9.64437417802424e-17	1.20673741539498e-16	2.37112659768089e-17	8.65227139180694e-17	1.2208988263101e-16	5.71699497059283e-17	1.09054132207351e-16	4.30993877600908e-17	9.01215756476787e-17	1.08122374572126e-16
2008215	11	1.04895931269901e-16	9.54242304282527e-17	8.51617727045938e-17	6.98804874038383e-17	8.77317330859221e-17	7.11071168424491e-17	8.50602095558238e-17	9.37029971840114e-17	1.19084124327831e-16	9.59636064081134e-17	1.19730869210689e-16	2.37232749479347e-17	6.38886811630027e-17	1.22073419070839e-16	5.55749448131417e-17	7.8921398011152e-17	4.41172827959869e-17	8.72468742638817e-17	1.07268458876634e-16
2008215	12	1.076190690849e-16	8.92892512032703e-17	7.31755229294794e-17	7.18082194978142e-17	8.89017738771153e-17	7.13923232621233e-17	8.2831306653716e-17	8.91331311506769e-17	1.09416674869515e-16	9.53158959218655e-17	1.19213389864346e-16	2.37440944070159e-17	4.26237534498542e-17	1.21990054123278e-16	5.42023276409197e-17	9.91351533991076e-17	4.56994351743655e-17	8.89815881354309e-17	1.02028442268628e-16
2008215	13	1.07950998286413e-16	8.26410995306622e-17	6.27338497819512e-17	7.05419432957639e-17	8.85008705479281e-17	7.13182064337923e-17	8.15525266540044e-17	9.04844652728526e-17	1.06809606045031e-16	9.60320381011621e-17	1.15250651490614e-16	2.47634957277424e-17	3.18978211045e-17	1.21440634084722e-16	5.31518908463382e-17	1.08882096638978e-16	6.53016427451649e-17	1.18002165835369e-16	8.64069917473309e-17
2008215	14	1.0814639157777e-16	7.86546804086431e-17	5.49128706130377e-17	7.06944072136989e-17	8.77044798991183e-17	7.29157451811873e-17	9.16328911854227e-17	9.23514543138124e-17	9.56450844885118e-17	9.56318742785429e-17	1.13863282187785e-16	2.4446868786046e-17	1.16673002462887e-16	1.21462466028525e-16	5.40062531401764e-17	5.4275132745907e-17	9.58810774730232e-17	1.11499304852217e-16	9.72532071998782e-17
2008215	15	1.09545456886806e-16	7.41980032885607e-17	4.96287262671299e-17	7.05979588242718e-17	8.60687124907826e-17	7.13604362941235e-17	9.26835777107068e-17	8.984339453181e-17	8.62515497757165e-17	9.05712682013897e-17	1.20406898212692e-16	2.4762835484497e-17	1.15929823485038e-16	8.28834867377563e-17	5.83555128093183e-17	4.29575715391215e-17	1.15654593825396e-16	1.07537239790744e-16	1.05683126969278e-16
2008215	16	1.08095469686541e-16	7.1253701080195e-17	4.5812196783245e-17	6.88966916811156e-17	8.47057619853858e-17	6.87597280872384e-17	1.01158432188766e-16	8.82743095037527e-17	7.95805422661434e-17	9.87597928164218e-17	1.20797120762944e-16	2.52730076014974e-17	1.00274823818994e-16	7.39122322622258e-17	6.30347166752037e-17	4.16988971528621e-17	1.11674583244737e-16	1.0259276839458e-16	1.0646361580894e-16
2008215	17	1.08024807241634e-16	6.97130778008922e-17	4.28514643244878e-17	6.46669677651232e-17	8.24267159454315e-17	6.56863777966975e-17	8.90284445624286e-17	8.72553822426718e-17	7.6325669112835e-17	9.81568764812383e-17	1.20862333028713e-16	2.49517537703214e-17	1.1996421516084e-16	2.78432565901692e-17	6.42686658847397e-17	4.57061085698502e-17	1.06328226276009e-16	8.85810239084473e-17	8.48538385115825e-17
2008215	18	9.6832308184512e-17	6.77630163130876e-17	3.99445792277178e-17	6.1086624966778e-17	8.15608111098578e-17	6.25744163390329e-17	8.37088268833073e-17	8.80862195764935e-17	7.87116790661816e-17	9.82409838494983e-17	1.20592105959769e-16	2.35174884532241e-17	1.18965447766651e-16	7.08386455789199e-18	6.35852078087821e-17	4.62794982603206e-17	7.23368476247875e-17	8.1683813405927e-17	6.70361896527565e-17
2008215	19	1.07746543251031e-16	6.63603520534231e-17	3.80239680113011e-17	5.954926725881e-17	8.1231177414696e-17	5.77793439792141e-17	8.4328791467473e-17	9.17474276718467e-17	8.10951816723795e-17	1.0777011743313e-16	1.19684880565958e-16	2.16922502226573e-17	1.18582181913381e-16	4.04998933039042e-18	6.01194425995175e-17	4.45602899017656e-17	1.08256510855329e-16	7.84476322799734e-17	5.6442704897256e-17
2008215	20	1.08303799806715e-16	6.50556001236613e-17	3.71584608231504e-17	5.97267524982151e-17	8.11863577362666e-17	5.55423249991495e-17	8.94304333661531e-17	1.01943109398116e-16	8.14196351212532e-17	1.09177990186194e-16	1.15298092988237e-16	1.999282716273e-17	1.18390723872835e-16	3.17042492915567e-18	5.66468108584543e-17	4.37354014227378e-17	1.0779195903821e-16	7.73494060407552e-17	4.95469397057339e-17
2008215	21	1.09447206471757e-16	6.36871212476918e-17	3.66526397802709e-17	5.72517517687052e-17	8.27562176317674e-17	5.40359101415238e-17	9.85119982773247e-17	1.08321914113482e-16	8.17009916921599e-17	1.08775203246079e-16	1.184889542033e-16	1.8303148157048e-17	1.1861402677473e-16	2.03895494907749e-18	5.88407000219093e-17	4.31532546107115e-17	1.08119487935002e-16	1.06170019101718e-16	4.05576636433528e-17
2008215	22	1.08279295889513e-16	6.28274154274e-17	3.61545866058198e-17	5.59235107593746e-17	8.84524201364134e-17	5.23182348225618e-17	8.91909860522827e-17	1.08434694388828e-16	8.30030378030459e-17	1.09401183788288e-16	1.17568548749751e-16	1.68829483763148e-17	1.18440294139642e-16	1.19955610741338e-18	6.69033615204024e-17	4.30355016913974e-17	1.08278322096629e-16	1.07962021141716e-16	2.57809575152976e-17
2008215	23	8.71322480061293e-17	6.24476136975345e-17	3.54645355035233e-17	5.45387088020741e-17	1.09775823491701e-16	5.06926505859535e-17	8.6494858977477e-17	1.08957201574293e-16	8.75597932620154e-17	1.02993214634361e-16	1.17451820518776e-16	1.58274719951429e-17	1.17555541449415e-16	1.06023263161565e-18	7.94686996079994e-17	4.3164751157266e-17	1.0830739688568e-16	1.08772262365447e-16	2.37413029151406e-17
2008216	0	9.54851742691628e-17	5.99644230741863e-17	3.48354901683283e-17	5.52659121432521e-17	1.09718696425903e-16	5.12441587583368e-17	8.33986608838743e-17	1.08438563615127e-16	9.42072348445563e-17	9.09126914288946e-17	1.16415850843697e-16	1.51056693656865e-17	1.16508267112608e-16	2.76594303437776e-18	8.76612218813767e-17	4.3438557180342e-17	1.07565220897884e-16	1.08489594944232e-16	2.3604080113518e-17
2008216	1	9.57876116942539e-17	5.76914599285959e-17	3.43051461617985e-17	5.87171239137562e-17	1.12752237331092e-16	5.14094123816485e-17	8.18047517800005e-17	1.07591644745799e-16	1.01195353215326e-16	1.0768165273657e-16	1.16467569902187e-16	1.46926654005359e-17	1.15738458292836e-16	5.80199171535797e-18	9.49755839588523e-17	4.37477320511744e-17	1.07498226589461e-16	1.08639711004905e-16	2.78978755471279e-17
2008216	2	7.77868513209148e-17	5.52651158011375e-17	3.39295384759903e-17	6.18973409989881e-17	1.14818866471958e-16	5.11369693576535e-17	8.95454757920166e-17	1.07617262896517e-16	1.03832659377742e-16	1.07649503409149e-16	1.18439730847398e-16	1.36694441855769e-17	1.17760658300103e-16	1.41373201740644e-17	1.01705663725404e-16	4.37201438693697e-17	1.07438639067931e-16	1.09269827605835e-16	4.80375604444114e-17
2008216	3	8.59657155360314e-17	5.34910070683655e-17	3.62272592083784e-17	6.19453598448978e-17	1.15784916118416e-16	5.07051534111508e-17	7.41084553618738e-17	1.08476574242279e-16	1.08124635175272e-16	1.07464984068123e-16	1.20678054495141e-16	1.27551917895544e-17	8.94416218494126e-17	3.35029919703224e-17	1.19937554788718e-16	4.33325525758353e-17	1.07511247875242e-16	1.09442435131243e-16	1.1236287714001e-16
2008216	4	1.07644959590986e-16	5.20953772286582e-17	3.61351373154399e-17	6.09419905450921e-17	1.17261139444791e-16	4.95121730009046e-17	7.22202553663349e-17	1.09177580977817e-16	1.08264910754627e-16	1.07261699208132e-16	1.21873281614891e-16	1.2668829416438e-17	8.14025399252882e-17	5.16218092045495e-17	1.14472076432578e-16	4.30842227079029e-17	1.07649197293209e-16	1.09752649432475e-16	1.14040411896512e-16
2008216	5	1.10213087413146e-16	5.07722968855048e-17	3.58915343085452e-17	5.9598468202988e-17	1.17983082472413e-16	4.71515595725863e-17	1.06570479171474e-16	9.58414316725831e-17	1.01559698405127e-16	1.07100201621433e-16	1.22238844833861e-16	1.26764786007258e-17	1.16407751676077e-16	6.93142833530584e-17	9.40286132506847e-17	4.56677346085299e-17	1.08075040140131e-16	1.09973627655221e-16	1.13697610157833e-16
2008216	6	1.10903986594432e-16	4.91287103186909e-17	3.68773430594694e-17	5.84679766757719e-17	1.17894564056972e-16	4.52573982566079e-17	1.06399195872618e-16	8.77471067310563e-17	6.97028083201185e-17	1.06902005317227e-16	1.22259456197618e-16	1.31991561173682e-17	1.19678230577439e-16	1.13583653980625e-16	8.42345788264073e-17	4.82593680261881e-17	1.08358734983122e-16	1.08898122749668e-16	7.11524266173818e-17
2008216	7	1.1028040036704e-16	4.61990633996297e-17	3.80313041014006e-17	5.70525332924082e-17	1.1777689856598e-16	4.51697066700638e-17	1.06036568076012e-16	8.92685245708087e-17	6.1162492967858e-17	1.13845052056746e-16	5.61951947185114e-17	1.35699949018042e-17	1.14113239091624e-16	1.15283459775396e-16	8.24768518309163e-17	4.91382204279677e-17	1.08934566824534e-16	9.83343268820434e-17	5.26268631472421e-17
2008216	8	1.04504069566986e-16	4.2800406902854e-17	3.85421727616877e-17	5.55467617032967e-17	1.17927959818903e-16	4.5595384187102e-17	1.06085336381871e-16	9.58587152656498e-17	9.38697109381434e-17	1.07793862152207e-16	2.84524287017592e-17	1.49582555983668e-17	1.07687115302082e-16	1.14093155356826e-16	8.10002829242883e-17	4.87859287185992e-17	1.08832703122506e-16	6.72795295916199e-17	3.9744145283376e-17
2008216	9	8.98400986235924e-17	7.4454693833098e-17	3.9707221150026e-17	5.35155805062192e-17	8.37444702556456e-17	4.45615732634379e-17	1.03661426557826e-16	1.00135381692023e-16	9.62693731006173e-17	1.0632124164442e-16	1.9737109866406e-17	1.42540125914273e-17	1.01803048317888e-16	1.1485938633244e-16	7.83684032156486e-17	4.83912768947531e-17	1.03081218597699e-16	7.36685997578777e-17	2.76153955889476e-17
2008216	10	9.02615123055016e-17	8.60604765678959e-17	6.03129462113278e-17	4.95316266312577e-17	7.31609616051359e-17	6.42564465824001e-17	1.0156617025397e-16	1.06438754108771e-16	1.05186317281484e-16	1.03110636300146e-16	1.66808010367886e-17	1.38024978120244e-17	1.06797083447309e-16	1.15592471545391e-16	7.53946783857497e-17	5.08702857670755e-17	9.8735848665352e-17	9.18223381663768e-17	2.13843841965989e-17
2008216	11	8.23266599571504e-17	1.07754865203992e-16	8.0183952529703e-17	5.57901932848049e-17	9.43115424147161e-17	8.54377037270267e-17	9.76457187363698e-17	1.08021724784676e-16	1.05002896986627e-16	9.93458870397755e-17	1.48941078023839e-17	1.31566835583178e-17	9.60722658828901e-17	1.17645781140841e-16	7.15225587083024e-17	5.76693552916527e-17	1.02283930345084e-16	1.08891211656939e-16	1.80841799019218e-17
2008216	12	1.01025978767082e-16	9.41908198145906e-17	7.01250422602683e-17	1.12827301497206e-16	9.63812868820783e-17	7.9471527093429e-17	9.17007747514618e-17	9.87213350529369e-17	9.9011525083099e-17	9.59462842972496e-17	1.346200476228e-17	1.22775849715375e-17	8.66464566505262e-17	1.16271790822386e-16	6.72102865335603e-17	6.21434494955496e-17	1.03058900504615e-16	1.12144964052438e-16	1.56378939569863e-17
2008216	13	1.07974131815078e-16	8.41724971460045e-17	6.06856748360165e-17	9.09748216330792e-17	1.032129037841e-16	7.64300283604586e-17	9.2495970615932e-17	9.92307136597479e-17	9.59211139451226e-17	9.71834163581966e-17	1.23900537893969e-17	1.11812160195403e-17	8.31970192481376e-17	1.16053471163869e-16	6.68772471542569e-17	6.58329312571616e-17	1.02251336620135e-16	9.70808458923365e-17	1.4728530154373e-17
2008216	14	1.11107490846854e-16	7.23264832084419e-17	5.60659042436785e-17	8.38083525098511e-17	1.07216525667387e-16	7.54793602829755e-17	1.00522238382859e-16	9.34750094954923e-17	9.28132582722729e-17	9.19136044524464e-17	1.16064854320077e-17	1.00350144790674e-17	8.08825523856493e-17	1.20928084698744e-16	1.17445198969374e-16	6.82889314400259e-17	9.41440485300434e-17	9.28750545713891e-17	1.65949616889591e-17
2008216	15	1.07646095668954e-16	6.00381944878759e-17	5.30174621701469e-17	7.89278497019708e-17	1.03526428527205e-16	7.4115499305667e-17	9.31599274799098e-17	1.02981960487765e-16	8.89013308366613e-17	9.7336537027379e-17	1.09197859540442e-17	9.27876727174826e-18	8.1092056681752e-17	1.17264456655262e-16	1.18403556020711e-16	7.4766041425264e-17	8.89988692648608e-17	9.19115157842422e-17	1.05685842742041e-16
2008216	16	1.05410870731917e-16	4.95931516345649e-17	5.09771155516107e-17	1.1297774909942e-16	9.31881719880987e-17	5.87884987957707e-17	9.94909934105509e-17	1.08072341561872e-16	9.22797449500843e-17	9.78782811820394e-17	1.02038424977739e-17	8.97953308262354e-18	8.78859165892491e-17	1.05918995350465e-16	1.16650664775859e-16	8.30023002912171e-17	8.95344149253248e-17	9.15018390586942e-17	1.0602685922379e-16
2008216	17	1.05069685122538e-16	4.14410660452697e-17	4.96247010530866e-17	1.12349405598006e-16	9.26445705051047e-17	4.93787874522618e-17	8.878352053721e-17	9.73563867281566e-17	9.97540767154303e-17	9.87008672671138e-17	9.30723953240512e-18	9.33319860708695e-18	8.8385979234762e-17	9.95257321212146e-17	1.12227416545828e-16	7.27642119496204e-17	9.65860701020378e-17	9.85820127673612e-17	1.07244372781451e-16
2008216	18	1.09382174682322e-16	3.4675494114638e-17	4.75561654478993e-17	1.13458803059547e-16	9.35155559442985e-17	4.32490944848281e-17	1.06625557425104e-16	9.5464664544576e-17	9.74435763738449e-17	9.90208937290571e-17	8.34364309167051e-18	1.03861712264688e-17	1.09462802922263e-16	9.81487312461299e-17	1.10294672663865e-16	6.53895629299716e-17	1.22001475465062e-16	9.59438649396529e-17	1.08797685727483e-16
2008216	19	1.05733412406016e-16	3.03531713332549e-17	4.62177064956876e-17	8.60143586366751e-17	1.06937284010345e-16	3.95515791851773e-17	1.06848946315193e-16	9.30050144276044e-17	1.01011214249063e-16	1.08675872144546e-16	7.53756316532186e-18	1.16030950174879e-17	1.10016633580624e-16	1.18671366053764e-16	8.58450512100956e-17	6.0349264376112e-17	1.21167548529861e-16	8.99559366497341e-17	1.10898467605552e-16
2008216	20	1.09399730847115e-16	2.94116509071111e-17	4.60550872199526e-17	6.48261909684751e-17	1.07233160847916e-16	3.76735921855473e-17	1.07158386454558e-16	8.22729792223361e-17	1.03556946464971e-16	1.08120947514855e-16	6.96457755334577e-18	1.32421808544498e-17	1.11633318139309e-16	1.04862415571382e-16	7.88914323828155e-17	5.74393415068684e-17	1.0392704335333e-16	8.86238018587925e-17	1.11324463434718e-16
2008216	21	1.10245398944981e-16	3.87561158483775e-17	4.59567995387962e-17	5.43886902929064e-17	1.04877099137458e-16	3.75448238095177e-17	1.08868617265144e-16	9.2916691713056e-17	9.96572200059058e-17	1.08585785466644e-16	6.60317554704905e-18	1.50103018926768e-17	1.1693283782442e-16	9.62817278904555e-17	7.53630883697549e-17	5.61672958370437e-17	1.07342887458301e-16	1.03028908716797e-16	1.10882089614302e-16
2008216	22	1.12587108620525e-16	2.47440380937627e-17	4.78727707339302e-17	4.90973384340053e-17	1.03468155600323e-16	3.8796525796178e-17	1.0988566491948e-16	8.39021014551184e-17	8.83098236643719e-17	1.08984871691992e-16	6.47299251295092e-18	1.97756778051125e-17	1.16905111182991e-16	1.02125103652033e-16	7.83406756764099e-17	5.55758202438076e-17	1.07747457805284e-16	9.99824241604537e-17	1.09297265309759e-16
2008216	23	1.09770909496822e-16	1.20002004425122e-17	4.80306549726207e-17	4.43151213473702e-17	1.07906310953151e-16	4.03104345066024e-17	1.11912497810874e-16	8.26539255568453e-17	8.72750681875936e-17	1.08873662141395e-16	6.44284079531078e-18	2.68341288242157e-17	1.16678639860926e-16	1.18193558467685e-16	8.04889545658028e-17	5.49725705193438e-17	1.07271450864342e-16	9.74070170685891e-17	1.08213368531675e-16
2008217	0	1.14018693599475e-16	2.06406102293585e-17	4.78693982682654e-17	3.97930336436311e-17	1.15111829375502e-16	4.21867159525534e-17	1.12106475079476e-16	7.32038104138689e-17	8.94764460615964e-17	1.09178185515586e-16	8.06242860956005e-18	3.5023703453963e-17	1.16302566745398e-16	1.1990063877911e-16	7.68638301531993e-17	5.50263731321222e-17	1.11668754888085e-16	9.4312576105105e-17	1.0777090373309e-16
2008217	1	1.10493334203167e-16	1.93503091858495e-17	4.75945427554289e-17	9.20546199145452e-18	1.11411557980836e-16	4.4769349621952e-17	1.13590089544822e-16	7.38495143842163e-17	1.0178566092273e-16	1.09232047281644e-16	8.49131805531179e-18	4.18473086264646e-17	1.17648999818373e-16	1.20284740800859e-16	7.39333797872518e-17	5.61630176244658e-17	1.14455465632654e-16	9.54674920168588e-17	1.0769191776769e-16
2008217	2	1.08773928235793e-16	2.19591762144579e-17	4.75698515160802e-17	1.84251932783352e-17	1.18619699834564e-16	4.81740733794304e-17	1.1623685196713e-16	7.79214607610364e-17	9.41790126233153e-17	1.09273394226348e-16	8.34278790983905e-18	4.60365127191731e-17	9.85095062151164e-17	1.19695749092642e-16	7.17914467712768e-17	5.58324220129219e-17	1.17226697139868e-16	1.01649472395322e-16	1.07761290772538e-16
2008217	3	1.11557078656052e-16	1.07814369850075e-16	4.8139751299607e-17	2.79546286675386e-17	3.43219729480627e-17	5.20291014201733e-17	1.04821888528956e-16	9.02562250301055e-17	1.00046495356685e-16	1.0966138365585e-16	9.13121905242139e-18	4.79677873028129e-17	9.02320318056307e-17	1.1899861859007e-16	7.05310037254228e-17	5.48682492844758e-17	9.81831648800858e-17	1.05484260169246e-16	1.08333495304457e-16
2008217	4	1.11677714469713e-16	1.08954320375268e-16	4.83354654279165e-17	2.56333467136323e-17	3.35745946391541e-17	6.01164842807038e-17	9.59758304746471e-17	9.38381700097447e-17	9.93660201334643e-17	1.05323162104961e-16	9.76056280175087e-18	4.8427885990186e-17	8.48922738185235e-17	1.18282030157339e-16	7.03748664370599e-17	5.35986079309034e-17	8.92605734025646e-17	1.07645511595906e-16	1.08196976831366e-16
2008217	5	1.10652373409151e-16	1.10526395404318e-16	4.99343028957917e-17	1.07069516526288e-16	1.15384032469522e-16	7.82106505891208e-17	9.05570951165415e-17	9.89342877346542e-17	9.62526720203844e-17	9.19675092946775e-17	1.04311331457255e-17	4.87251020326686e-17	7.84518799650419e-17	1.18615693145818e-16	7.17526663239263e-17	5.32401886471487e-17	8.75300859826862e-17	1.10778742683021e-16	1.07760857543286e-16
2008217	6	1.08011762558912e-16	1.09389295795146e-16	5.47618121404121e-17	1.06605274347235e-16	1.06703217187575e-16	8.08462371291957e-17	1.16278549647186e-16	8.93907664134643e-17	9.4294945968067e-17	1.11146120684844e-16	1.14651151895767e-17	4.97155657341329e-17	1.18607728381067e-16	1.19234188028979e-16	8.57231363940914e-17	1.19735412345512e-16	3.46816071498118e-17	1.11159063754064e-16	1.07268694476722e-16
2008217	7	9.1013412001211e-17	1.02012664339709e-16	6.7073462841834e-17	1.07599456220334e-16	1.02424771859685e-16	8.61793786331499e-17	1.11699741589727e-16	9.72553834458699e-17	9.1361898247498e-17	1.02650654951804e-16	1.2108961409069e-17	5.18995341138088e-17	1.20277921891528e-16	1.19602052510679e-16	9.01096503536521e-17	1.21304737141878e-16	7.14971804515191e-18	8.85834872076199e-17	1.06553241762948e-16
2008217	8	7.35867399183801e-17	9.32951697162424e-17	1.17183335049966e-16	1.0874349542427e-16	1.02536545438002e-16	1.02405280161474e-16	1.06238675097045e-16	8.48631563684561e-17	9.22255785499503e-17	1.04291667034631e-16	1.34060764020475e-17	1.10427732154357e-16	1.20807241139284e-16	1.20461270510619e-16	8.15026430631993e-17	8.70805393181699e-17	4.11159823610894e-18	8.69139370329237e-17	1.03332071174355e-16
2008217	9	9.41496878355543e-17	1.05603053321677e-16	9.46669840066983e-17	1.08760331220493e-16	1.08782304177096e-16	1.05284282006324e-16	1.07429384364434e-16	1.86597320292977e-17	1.00477007552857e-16	1.00739457817846e-16	1.51630722968394e-17	9.14339898467557e-17	1.21062139703549e-16	1.21038324648094e-16	7.35847169615333e-17	1.1081290390603e-16	7.33454845522629e-18	8.8279624652999e-17	1.06362122004117e-16
2008217	10	1.10594786191692e-16	1.05474710389461e-16	6.93187609916267e-17	9.38882966593758e-17	1.04565219968138e-16	9.36086563102192e-17	1.01506141652874e-16	8.15451093269655e-18	1.06582752014803e-16	9.4595693137024e-17	1.68063562520802e-17	7.22193677950822e-17	1.14481796605457e-16	1.21616825038118e-16	6.67064617510498e-17	8.64941024086599e-17	3.51487686939256e-17	8.91848885640621e-17	1.06084884821663e-16
2008217	11	1.08546019920245e-16	7.6972210170274e-17	6.19107359666373e-17	8.12730434836587e-17	5.56437424272521e-17	9.62380498553351e-17	1.06557727395641e-16	9.09171216283486e-17	1.09318643927103e-16	8.79875800554367e-17	1.80758796118445e-17	6.4075488018801e-17	1.01735583997612e-16	1.10107581410158e-16	6.24766963040796e-17	9.86201682500932e-17	1.0201169253104e-16	9.02508856538357e-17	1.0605086771037e-16
2008217	12	1.05854547390248e-16	8.04088047006248e-17	5.89771780700353e-17	9.74994638115398e-17	2.84250365052328e-17	9.28970106232357e-17	1.0084662092193e-16	9.83050893724264e-17	1.09270975513166e-16	7.98417202148593e-17	1.96554660020714e-17	6.02346133610497e-17	9.27573300011228e-17	9.47824901106254e-17	6.47906018541984e-17	9.49489462802877e-17	9.6906756482224e-17	1.01593080181862e-16	1.06189754963131e-16
2008217	13	1.01645256442219e-16	1.00540529388698e-16	5.62731876020783e-17	1.01183448928163e-16	6.02738099179857e-17	9.17540773793061e-17	9.49036702348365e-17	1.06313014591982e-16	1.09093669157311e-16	7.52042527295697e-17	2.18189134531943e-17	5.90613799563739e-17	9.03129234467135e-17	8.32141839273513e-17	1.16790150216749e-16	9.50086624621483e-17	7.75766533150015e-17	1.02064423041168e-16	8.94400656188487e-17
2008217	14	9.66355267102792e-17	1.02508199153568e-16	5.55092112242898e-17	9.43498846540901e-17	9.0781751993289e-17	8.64030161565792e-17	7.62828107220465e-17	1.06748927267661e-16	1.07326031861717e-16	8.31467297589584e-17	2.38617632714434e-17	5.95799290533675e-17	1.12329294098107e-16	9.81716356322289e-17	1.08113032263102e-16	1.03183801738884e-16	8.5843860327854e-17	1.07300681692007e-16	7.19463738867125e-17
2008217	15	9.69311592041304e-17	1.05057870788575e-16	5.7876821699595e-17	1.00412102448594e-16	1.05808003489877e-16	1.01474282818399e-16	7.62972886221412e-17	1.04550126314534e-16	1.08179301031125e-16	9.09227526486638e-17	2.3509998137751e-17	6.17223927769401e-17	1.09920758024622e-16	4.69246353741058e-17	1.12554012053432e-16	9.29637338481025e-17	9.58218001458286e-17	1.0898922571935e-16	6.69649883011858e-17
2008217	16	1.05302221503516e-16	1.04640117655551e-16	6.59365237999423e-17	9.59294241155016e-17	1.09955446345594e-16	9.06008639258016e-17	8.13761884784222e-17	1.00465731085372e-16	1.0921289457981e-16	1.06831110505819e-16	1.54713192938593e-17	6.48012569131543e-17	1.10856240622845e-16	1.90299374614122e-17	1.02179412883779e-16	1.0999353719846e-16	1.05777371986489e-16	1.10160877892398e-16	6.84250190005459e-17
2008217	17	1.00175910135511e-16	1.04846843334509e-16	6.1075001525981e-17	9.51394033154219e-17	1.07107483581832e-16	1.06119680282262e-16	9.40328831979538e-17	9.56614876937549e-17	1.05397713302593e-16	1.0723419394862e-16	8.88527642910187e-18	6.73795858624672e-17	1.19327928079311e-16	1.16032235623021e-17	1.00531761750859e-16	1.10058802256969e-16	1.00776609790614e-16	1.05453514197376e-16	8.02086254972601e-17
2008217	18	1.07115190319125e-16	1.04848842595597e-16	1.08588838506869e-16	1.01467274475167e-16	1.01645258437677e-16	1.06734296859662e-16	1.0606533819226e-16	9.11516068768637e-17	1.0178358149119e-16	1.0941869351989e-16	9.27379119238945e-18	6.8402899544897e-17	1.14572259376843e-16	9.51215886871679e-18	1.1255081057151e-16	9.88081947361189e-17	9.14769512564152e-17	1.03642874844313e-16	1.05232424976485e-16
2008217	19	1.10352065550929e-16	1.0471506158307e-16	9.3939996457881e-17	1.00109961458522e-16	9.93622018053365e-17	1.06759961097523e-16	1.07190726876802e-16	9.94006547567649e-17	9.87696768577528e-17	1.09065290609465e-16	1.05388956263501e-17	6.84575949032119e-17	1.13255982419597e-16	8.4760667511142e-18	1.10831477261868e-16	9.56187198323895e-17	9.53856865446612e-17	1.03787892244496e-16	1.05934188947316e-16
2008217	20	9.8981042350208e-17	1.05015319585016e-16	7.58137600530873e-17	7.98994303015625e-17	1.05949861538357e-16	1.06774250492074e-16	1.09822658085801e-16	9.10408113552495e-17	9.55506634578297e-17	9.21745672338551e-17	1.08163337864498e-17	6.76523314749179e-17	1.13720590874885e-16	5.76080831763255e-18	1.08530888600505e-16	1.06517551596392e-16	1.06976375743519e-16	1.04401110276378e-16	1.06318200702665e-16
2008217	21	9.02894010746124e-17	7.68960169241443e-17	6.91903191803998e-17	1.01504713597612e-16	9.79862548277597e-17	8.65095642610759e-17	1.17175656490399e-16	8.71356784331636e-17	9.24313157558384e-17	8.82877676298166e-17	1.127514725938e-17	6.60743892988937e-17	1.16956780881064e-16	5.91464762750826e-18	1.04034441420266e-16	1.07656509143887e-16	9.41476149934002e-17	1.07283456062706e-16	8.77330835033014e-17
2008217	22	8.80456877941669e-17	7.0537651139819e-17	6.57420073023518e-17	9.18980138492447e-17	6.89128858192472e-17	8.1073742438339e-17	9.43434415482599e-17	9.14221966594263e-17	9.20974759092925e-17	8.88082305361054e-17	1.36131316551583e-17	6.27513870718198e-17	1.13213681453528e-16	8.41498141185805e-18	9.41471622257486e-17	9.36401820489657e-17	1.03601632146949e-16	1.07691901865593e-16	7.21722218768198e-17
2008217	23	9.29780894275118e-17	1.06188787675997e-16	6.36983700401953e-17	7.5299539247362e-17	5.67275575283407e-17	7.33022948437586e-17	8.98653281708654e-17	9.73627051690622e-17	9.27366886069012e-17	8.87163784867595e-17	2.02042385966386e-17	5.91244565701527e-17	1.11649204722547e-16	1.45832630717718e-17	9.72955831561572e-17	8.82697825292633e-17	9.68879818054229e-17	1.13087080545123e-16	6.65430824670005e-17
2008218	0	1.01463415321462e-16	1.06169851694909e-16	6.24657685016983e-17	1.05617810867815e-16	6.96489565463354e-17	6.97901830801986e-17	8.46326511989188e-17	1.03019819051829e-16	9.11876892847026e-17	8.95248512539934e-17	2.3252195289479e-17	5.61460073689542e-17	1.12405367735416e-16	1.72469759613969e-17	1.01099634580294e-16	8.85290681720755e-17	6.73063829527328e-17	1.15895209500886e-16	6.88789696495417e-17
2008218	1	1.09844929447308e-16	1.06381758604657e-16	6.95946455393391e-17	1.05356103564249e-16	7.46283154773285e-17	7.1428079098994e-17	8.05629690895213e-17	1.08460199892306e-16	9.23949181571211e-17	9.28214952838031e-17	2.02750180709296e-17	5.40248838937626e-17	1.13498113078507e-16	1.93247882556152e-17	1.00807814462223e-16	1.1291517131142e-16	7.13998515893325e-17	1.19089690044319e-16	7.24165663008032e-17
2008218	2	1.09986780266069e-16	1.06478726274438e-16	7.24661247668012e-17	1.05755338601671e-16	8.23903697201001e-17	6.94563088826038e-17	8.07371443747469e-17	1.09103136749688e-16	9.90057960344275e-17	9.99312602399511e-17	1.49019161335306e-17	5.37847819560098e-17	4.57432877050015e-17	2.1410525281976e-17	1.05822832854797e-16	9.40660653089294e-17	9.05448538343912e-17	1.1759219352609e-16	7.65606441664494e-17
2008218	3	1.10308816047198e-16	1.06445664592375e-16	7.27325774889896e-17	1.05567916770741e-16	9.81340355968961e-17	6.86233202037715e-17	8.18592627386492e-17	1.09374333866273e-16	9.7551290506553e-17	1.09255087668323e-16	1.12374698093469e-17	5.47183610072206e-17	2.17475321676165e-17	2.38282888398252e-17	8.55907580434438e-17	8.61215907474195e-17	1.00788533776772e-16	1.12813546771881e-16	1.07886459560825e-16
2008218	4	1.10422868998136e-16	6.28931619993097e-17	7.04853686299973e-17	9.75811029046353e-17	1.07596242400373e-16	1.08419406494586e-16	8.33540671220324e-17	1.09886174112531e-16	1.01662784895587e-16	1.08104433741549e-16	8.75672610708538e-18	5.53545626435828e-17	1.16498589238945e-17	2.65993919160833e-17	1.04984877509111e-16	7.4067370038878e-17	8.34809961981277e-17	1.11974595587634e-16	1.10257601075943e-16
2008218	5	1.10142142506518e-16	5.82010978123261e-17	6.5744399619888e-17	1.05816264440254e-16	1.10835331676623e-16	1.07625978660794e-16	1.07681163642062e-16	1.10403073033838e-16	1.14265231564551e-16	1.07085385455765e-16	9.05295353823194e-18	5.52312752400873e-17	7.3965440454783e-18	2.92118412606948e-17	1.05153352062092e-16	6.0446693605972e-17	7.31351696026037e-17	1.12126437319969e-16	1.13804352985035e-16
2008218	6	1.10451387916217e-16	5.91569848790508e-17	1.16182511257154e-16	1.05860581373193e-16	1.10259554072405e-16	1.07444166545304e-16	1.06955899121347e-16	1.11100537805588e-16	1.10569155377139e-16	1.06633817811477e-16	1.16820705914635e-17	5.62107189153585e-17	6.67636025836204e-18	3.13977335100976e-17	9.47211825207139e-17	5.72452336758451e-17	6.15496428715008e-17	1.08820543370391e-16	1.16453175805592e-16
2008218	7	1.11750222983026e-16	6.24727278063651e-17	1.18367833802404e-16	1.05841186723557e-16	1.07216431455647e-16	1.06817557375635e-16	1.0683701617452e-16	1.12156691583545e-16	1.11507242450929e-16	1.06573513187675e-16	1.45961872155521e-17	5.88874707523709e-17	7.55645665845034e-18	3.28214743919487e-17	7.31826810361179e-17	6.735305674203e-17	9.87463445582882e-17	1.05350940839639e-16	1.1731538556966e-16
2008218	8	1.09881551056151e-16	1.06273347073846e-16	1.19205015097316e-16	1.05400349207194e-16	1.11898269360485e-16	9.58855681675941e-17	1.06497352778709e-16	1.09433649449132e-16	1.09026983363189e-16	1.06576467627016e-16	2.17860003119518e-17	5.75348868974439e-17	9.35228132648255e-18	3.36847267118037e-17	6.32003794892888e-17	8.00728527536519e-17	1.10020766627938e-16	6.96963516580609e-17	1.17716664826724e-16
2008218	9	1.10138034492875e-16	1.06143166141688e-16	1.16555652073083e-16	1.05412700692909e-16	1.11201263931228e-16	8.85664870173709e-17	1.06356550164281e-16	1.08746419807463e-16	1.07385701933327e-16	1.06501402773522e-16	2.34786730377379e-17	5.5646169067116e-17	1.17454082086888e-17	3.41782338965202e-17	5.70736950944155e-17	7.99109501224644e-17	1.06913144904292e-16	3.18925615270739e-17	1.18092796462688e-16
2008218	10	1.12681966611941e-16	9.63120307615644e-17	9.77534311141237e-17	1.00404412877124e-16	1.1048417701303e-16	8.15828605747915e-17	1.06004220176687e-16	1.0176691506209e-16	1.07057927368061e-16	1.06332072307842e-16	2.53653906935336e-17	5.55297078418391e-17	1.40843469376539e-17	3.37672180601435e-17	6.17758112854889e-17	7.41057851129254e-17	1.00302209590829e-16	2.44283326088238e-17	1.17700613479967e-16
2008218	11	1.08677413810284e-16	8.33662044455191e-17	8.74977309006951e-17	9.46958409550686e-17	1.01364594880495e-16	8.16082484200712e-17	1.05649339898522e-16	9.72149518049798e-17	8.31056705636348e-17	1.07435227955144e-16	2.8751287320812e-17	5.57049758135921e-17	1.59657988636445e-17	3.34644785952944e-17	6.30901148738693e-17	6.92335895289164e-17	1.18325130889617e-16	2.44213120469189e-17	1.16407739050693e-16
2008218	12	1.09811480912052e-16	7.60433782278218e-17	8.07182080397607e-17	1.05135326612781e-16	9.5970175837053e-17	8.04620590554602e-17	9.7231509319818e-17	9.51380946444671e-17	4.52978927945951e-17	9.69908119704421e-17	3.15188397042171e-17	5.46062196049369e-17	1.70626824851868e-17	3.29201213099521e-17	1.06340138345298e-16	6.42309633316533e-17	1.14449316978488e-16	2.59373416360572e-17	1.06221282451705e-16
2008218	13	1.13052401450711e-16	6.97077729462553e-17	7.49339594504814e-17	1.05211896003126e-16	9.30918605571596e-17	7.73403023930404e-17	1.00406245567311e-16	9.42606826513389e-17	3.16740130817635e-17	9.30411867423479e-17	3.40484091450517e-17	5.29142995144733e-17	1.77330841585301e-17	3.20932741536946e-17	7.17789485241631e-17	6.01031471664831e-17	1.03871377917684e-16	2.73492849367599e-17	9.35297395610586e-17
2008218	14	1.13752987033306e-16	6.37229255407789e-17	7.00112482872914e-17	9.12596826382828e-17	9.16021185730376e-17	7.23676453236261e-17	1.04804024637647e-16	9.17902171039612e-17	2.73425884631587e-17	8.90946614205444e-17	3.73650230495772e-17	5.0847579499318e-17	1.81382603093168e-17	3.12597140708154e-17	6.5726814043648e-17	5.87635265752112e-17	1.00544071130095e-16	2.83668660304983e-17	8.37981714045348e-17
2008218	15	1.14491468909027e-16	5.95461697623326e-17	6.58544089820717e-17	8.06720321937704e-17	9.16038876994976e-17	6.63421307512745e-17	1.04737942325686e-16	8.92794800547285e-17	2.69226175422362e-17	8.52699525193966e-17	4.05211473150588e-17	4.86142698647991e-17	1.81528919553081e-17	3.05439990625948e-17	1.07714349071001e-16	5.64009882755894e-17	1.0675134100253e-16	2.91094172727575e-17	7.59206573866202e-17
2008218	16	1.14793344577429e-16	6.1938695493473e-17	6.26713059461408e-17	7.50046939976505e-17	8.92148661173956e-17	6.08695916512066e-17	1.04753066836795e-16	8.68750096472214e-17	2.73455988965909e-17	8.95597896613264e-17	4.27849522514528e-17	4.6248799059125e-17	1.84930225130562e-17	2.98286713753534e-17	1.08594546320632e-16	5.29517428555655e-17	1.08764753255845e-16	2.96118446325508e-17	6.73253402078981e-17
2008218	17	1.14939180930938e-16	6.49180920745648e-17	6.0560684274624e-17	7.11984365606087e-17	8.77770185131729e-17	6.13959497905234e-17	1.04951510489497e-16	8.48766124943736e-17	2.75749628616625e-17	8.95153858867397e-17	4.37917844922153e-17	4.39296150978146e-17	2.16476304432132e-17	2.93255738319805e-17	1.08921399727761e-16	5.12861262012578e-17	1.08225356762591e-16	2.99050324183702e-17	6.32825079261769e-17
2008218	18	1.15101483386558e-16	6.96613733327127e-17	5.79560545440905e-17	1.05524893787114e-16	8.83569736435662e-17	1.10894151907072e-16	1.05488408438993e-16	8.31760374591589e-17	2.78815219589765e-17	1.14803458836262e-16	4.40288958124856e-17	5.99692067856379e-17	3.14198660069407e-17	2.90610850518504e-17	1.08952028101677e-16	5.02682250010075e-17	1.08048512145372e-16	3.01012371203848e-17	6.11449007955895e-17
2008218	19	1.15224673688551e-16	6.87571015284094e-17	5.58910806494161e-17	1.05584556235141e-16	9.23413679391781e-17	9.92001301422475e-17	1.08560973594568e-16	8.19005596747854e-17	2.81351983060017e-17	8.985731826222e-17	4.40466781161986e-17	7.64305196572829e-17	3.33186168692557e-17	2.91046578847475e-17	1.09416698854403e-16	5.45197738130444e-17	7.95135017283377e-17	3.02319444529854e-17	5.97596289507177e-17
2008218	20	1.14943467656497e-16	6.76924935551132e-17	5.58305751421877e-17	1.06593269269523e-16	1.06525833641471e-16	8.83373070869288e-17	1.15235243625276e-16	8.23845841959916e-17	2.83351426345499e-17	7.87480176615126e-17	4.43812895499799e-17	9.89927691174544e-17	3.30561916118505e-17	2.99726693899957e-17	1.0874618593888e-16	5.74749036070779e-17	3.50367494751587e-17	3.03254599944567e-17	5.5326043056425e-17
2008218	21	1.15236448741738e-16	8.20601436838799e-17	5.63421969367282e-17	1.06632017549899e-16	1.07046873514878e-16	7.91104286408187e-17	9.42961381003485e-17	8.34918986617204e-17	2.83816714209653e-17	7.60290282994506e-17	4.45263970499013e-17	8.05153632441283e-17	3.47745446864025e-17	3.1716198294197e-17	1.07281253324299e-16	5.84024429857563e-17	4.69294378402378e-17	3.04176856339636e-17	7.06767139113323e-18
2008218	22	1.15918751377804e-16	1.16578708076436e-16	5.69826205563374e-17	1.07195187719051e-16	1.07329169886886e-16	7.49940435473795e-17	8.08344501184291e-17	9.31703753483465e-17	2.83300900038281e-17	7.89033237865746e-17	4.43861315741509e-17	6.11556937240002e-17	3.86216891983883e-17	3.37521886252017e-17	1.06076128066709e-16	6.67439321359777e-17	9.19995667778972e-17	3.05843303429175e-17	5.95536024096032e-18
2008218	23	1.14827758118339e-16	1.0080301364177e-16	5.74286354045681e-17	1.08663324576479e-16	1.0778974635392e-16	7.12589890292123e-17	7.17482851973225e-17	1.10080971082053e-16	2.84378025340762e-17	8.38334612171322e-17	4.39270105199308e-17	4.95804784214978e-17	4.24504573264026e-17	3.56918982000371e-17	1.06735655637687e-16	6.94841203880902e-17	7.41722578111086e-17	3.07832467260129e-17	6.44646811396989e-18
2008219	0	1.10678590141052e-16	8.89350347162226e-17	5.78610877011279e-17	9.81493044953645e-17	1.08385802627716e-16	6.870517479707e-17	6.32294522297048e-17	1.09751593114542e-16	2.86286210635085e-17	8.33930282942403e-17	4.33192522111496e-17	5.40191514899391e-17	4.47061157907526e-17	3.72604799651632e-17	1.05734910868683e-16	6.66863812711914e-17	7.14697187787856e-17	3.09873820530474e-17	1.28329611372806e-17
2008219	1	1.08666479602741e-16	8.04157106735787e-17	5.86610726401398e-17	9.34924962439184e-17	1.08840343332872e-16	6.63634005794812e-17	5.54871390448755e-17	1.09431985501422e-16	2.86263478170006e-17	8.48212258900047e-17	4.8812714890582e-17	5.92807417066596e-17	4.67357806933983e-17	3.83545791630082e-17	1.05624004602342e-16	6.3725553191465e-17	9.57811680601095e-17	3.11472272924981e-17	2.11062233274099e-17
2008219	2	1.16344038147872e-16	7.50481824845272e-17	6.36048703119822e-17	8.91856858690963e-17	1.09381715924963e-16	6.92389799521575e-17	5.02297335515798e-17	1.09884411887313e-16	2.8793133698872e-17	8.61593305963795e-17	6.05249589875438e-17	6.0430058008717e-17	4.90068296744175e-17	3.90559297636634e-17	8.16076155814071e-17	6.15217476983854e-17	1.08317770466535e-16	3.12008027950794e-17	3.70662631168996e-17
2008219	3	1.16054955515799e-16	7.21799679144811e-17	6.74916114138233e-17	8.34928210023232e-17	1.10066259238078e-16	7.81096690872956e-17	4.65959428777438e-17	1.10637408973591e-16	2.91480500411736e-17	8.42941692284649e-17	8.16107401274835e-17	5.46094739972477e-17	5.39176999985111e-17	3.92658196701688e-17	6.79171083006002e-17	5.98785513736243e-17	1.08740208700474e-16	3.11338254545198e-17	5.98469457272347e-17
2008219	4	1.15903825521162e-16	7.60407681283189e-17	6.84181886020405e-17	8.22287136146064e-17	1.10754853717966e-16	7.91094907656764e-17	4.45716603160583e-17	1.11712545103579e-16	2.9871474978766e-17	8.26381093923259e-17	9.93137261133836e-17	4.77881266956896e-17	6.53848979336057e-17	3.89888073258594e-17	6.56584892182637e-17	5.8195700076804e-17	1.08983388396036e-16	3.09685451319776e-17	6.18940141350527e-17
2008219	5	1.0844274080564e-16	7.60978855944911e-17	7.19548744855533e-17	8.09402965512452e-17	1.11165257147627e-16	7.66485309171041e-17	4.81051234622046e-17	1.1277033143137e-16	3.02436692522065e-17	8.23300547325883e-17	1.04707458108459e-16	4.25647891988088e-17	9.91555599734715e-17	3.84273336670447e-17	1.05696732209843e-16	5.77041313964897e-17	1.09198694652226e-16	3.07083790350965e-17	5.46672574781084e-17
2008219	6	9.9723844500637e-17	7.99094327673596e-17	7.63572031468551e-17	1.18910042145469e-16	1.11968616754171e-16	7.42280249433944e-17	5.79790922045782e-17	1.13347859864342e-16	3.05209271206076e-17	7.95015243352038e-17	1.07302721873499e-16	3.79900937056134e-17	1.01547393702257e-16	3.77472246426648e-17	1.06688784636628e-16	7.22397332876846e-17	1.09375533568353e-16	3.0388783747832e-17	4.9950685535037e-17
2008219	7	9.12768739184677e-17	8.08849812924061e-17	7.75942881028619e-17	1.20004387846861e-16	1.12084830907333e-16	7.55913641605837e-17	6.87395208287649e-17	1.14108432382212e-16	3.08831367871327e-17	8.07466164103932e-17	1.10356633976691e-16	3.66738174182117e-17	1.07805666786838e-16	3.72355752981759e-17	1.05684166383293e-16	1.18779199902081e-16	1.09712190403712e-16	3.00905500450564e-17	4.89482034562572e-17
2008219	8	8.46003801235572e-17	7.79485511887211e-17	7.2579621269245e-17	1.07393171841731e-16	1.13051213541383e-16	7.48858413159957e-17	8.40208527929903e-17	1.15591916355587e-16	3.13019057023828e-17	7.88615106302451e-17	1.11878050851456e-16	3.41470230440502e-17	1.1125586275944e-16	3.67254814438369e-17	1.05774947271891e-16	9.0653941707618e-17	1.10199424825817e-16	3.00739318330654e-17	1.20140402960064e-16
2008219	9	7.6350745517424e-17	7.38795774765245e-17	6.66390146659355e-17	9.48275687651898e-17	1.13946743985235e-16	7.21623229582774e-17	1.11711475739336e-16	1.09340583103237e-16	3.11998166452334e-17	7.61551549365671e-17	1.07531805430027e-16	3.16871342746729e-17	1.19390351787716e-16	3.61686085888184e-17	8.5542675111925e-17	7.74699340310108e-17	1.10661859906361e-16	3.05197909447253e-17	1.16962456494335e-16
2008219	10	6.70914377867625e-17	6.87028169733854e-17	6.30625209377897e-17	8.5970006708487e-17	1.12029979706713e-16	6.94139821122494e-17	9.73316280817585e-17	1.0045963810535e-16	3.14267449705497e-17	7.66166833119287e-17	1.00481691588288e-16	2.95631052492411e-17	1.1645618216432e-16	3.56588775056992e-17	7.68994749825857e-17	7.05043350216293e-17	1.11886170647546e-16	3.0226400695153e-17	1.10391161735752e-16
2008219	11	5.95004629978241e-17	6.51454260317564e-17	5.98392327687792e-17	7.98404071076338e-17	1.09983321196719e-16	6.64742265500436e-17	8.72712531460523e-17	9.25554740696516e-17	3.18772197617179e-17	7.47227997815479e-17	9.44402683321012e-17	2.74580745023404e-17	8.39662861241829e-17	3.53910137315787e-17	1.05321101501225e-16	6.53099468966839e-17	1.12732726663325e-16	3.16016526499563e-17	9.90651516439882e-17
2008219	12	5.4120924702123e-17	6.06076956580192e-17	5.87398168494691e-17	7.68487257215288e-17	1.0712779970828e-16	6.30321384859974e-17	7.71633187596704e-17	8.59165950700433e-17	3.31298163300582e-17	7.41441018331039e-17	8.94499832861462e-17	2.56459859865393e-17	7.14567151301991e-17	3.52919277015065e-17	1.05424645007853e-16	6.14436111178456e-17	1.08822885965945e-16	3.1536119144871e-17	8.03189284771636e-17
2008219	13	5.05960725417568e-17	5.69813066736832e-17	5.9115432057627e-17	7.28168481475115e-17	1.03289104273352e-16	5.94235947324593e-17	6.92197382189044e-17	8.03287027561494e-17	3.57319517865534e-17	7.10178121102904e-17	8.55812835569518e-17	2.42033413955576e-17	6.70233755527092e-17	4.13431368101125e-17	8.8395628414157e-17	5.85091997037001e-17	1.02702076259806e-16	3.12248745765776e-17	6.56146117777878e-17
2008219	14	4.67579939773196e-17	5.43197853711322e-17	5.58367037654598e-17	6.53560019147477e-17	9.86218057977052e-17	5.63509306326736e-17	6.32795304508027e-17	7.4865563266482e-17	3.86276162653439e-17	6.76842315242099e-17	8.24778938794551e-17	2.29803586481826e-17	6.4829319803664e-17	5.82348935087133e-17	7.71452569753473e-17	5.62206032663467e-17	1.1135852336538e-16	3.12901329628907e-17	5.69012937278797e-17
2008219	15	3.98711086134912e-17	5.24565476436532e-17	5.22401657692943e-17	5.84508311522932e-17	9.34037512755782e-17	5.40408992892002e-17	6.00877739343767e-17	6.95019210370788e-17	4.14202671792942e-17	6.35437019957051e-17	7.96519610187204e-17	2.19902518329953e-17	6.32900341631011e-17	7.91407835812348e-17	7.40703594467189e-17	5.39759751914459e-17	9.37269707800805e-17	3.24090099933589e-17	5.21940049508446e-17
2008219	16	3.43469655681378e-17	5.10273137182324e-17	4.88482370860355e-17	5.289875344945e-17	8.68809965861823e-17	5.24165510027647e-17	5.84487486289515e-17	6.37860441076311e-17	4.41721155402593e-17	5.96631825063726e-17	7.65038377683558e-17	2.1227715926759e-17	6.02261078815196e-17	9.75524836753873e-17	6.96204241248293e-17	5.20960163667616e-17	9.29773865895404e-17	3.38762016384633e-17	4.96185604120573e-17
2008219	17	3.1630304169877e-17	4.98933437427902e-17	4.53434072108844e-17	4.98875533863148e-17	8.07336222615573e-17	5.12448139192499e-17	5.76818625586374e-17	5.84132661177444e-17	4.68055258276656e-17	5.50573085262277e-17	7.39797485212872e-17	2.04851777472009e-17	5.81654184466661e-17	1.03863150230102e-16	6.72425633376936e-17	5.05311523454185e-17	9.26732061025208e-17	3.55814154854263e-17	4.74653061692721e-17
2008219	18	3.09888116148526e-17	4.87512411985038e-17	4.21790475469316e-17	4.68366092508524e-17	7.51695865400684e-17	4.97846344290733e-17	5.59774584558645e-17	5.36207189651717e-17	4.96401208602119e-17	5.08680059066744e-17	7.08943200353069e-17	1.96600225445402e-17	5.74779971315854e-17	1.10726760103052e-16	6.64678289968993e-17	4.91983500718079e-17	9.3260487377395e-17	3.73487604951128e-17	4.47506527917424e-17
2008219	19	3.17173397265242e-17	4.78420935069385e-17	3.95454224336326e-17	4.62603360061447e-17	6.85326956807142e-17	4.83726912702286e-17	5.45430051487647e-17	5.01993242167083e-17	5.16571878294964e-17	4.65669894726837e-17	6.77834966974404e-17	1.93339500668368e-17	5.88254959743893e-17	1.19814006440577e-16	6.11071676528757e-17	4.74811709055052e-17	9.10928494056674e-17	3.97627648667524e-17	4.18226011485273e-17
2008219	20	3.34765751384184e-17	4.71396814857744e-17	3.83362931918996e-17	4.73305463120014e-17	6.13313574189768e-17	4.66289787565901e-17	5.38330145353126e-17	4.69770414272379e-17	5.275535410671e-17	4.24558554664028e-17	6.50132336025225e-17	1.89756882917421e-17	6.00995750532775e-17	1.21473689255963e-16	5.67260132427752e-17	4.62232481697407e-17	8.75376792506996e-17	4.42499086440677e-17	4.02616726963788e-17
2008219	21	3.65985186299368e-17	4.64971164465702e-17	3.77183059616109e-17	4.8968425934135e-17	5.57478065975684e-17	4.50704694056221e-17	5.28389269541618e-17	4.51058845168943e-17	5.16214116000839e-17	3.23572868288241e-17	6.26950410466247e-17	1.85285468445849e-17	4.84087998921233e-17	1.20853439206889e-16	5.28530774714032e-17	4.57455898199151e-17	8.57086323022809e-17	4.94049812059993e-17	3.99767083236138e-17
2008219	22	4.23316910718285e-17	4.5972781959909e-17	3.70668660514239e-17	5.01692385506059e-17	5.26431949372091e-17	4.3850599714047e-17	5.04410950709209e-17	4.46828410999859e-17	5.13842437534444e-17	2.5629789784231e-17	6.08005408717426e-17	1.81956312863381e-17	2.3409463598436e-17	1.20370718861638e-16	4.80573371339328e-17	4.59413737870358e-17	8.48092861646364e-17	4.92158267054146e-17	3.92595857603199e-17
2008219	23	5.56705188439291e-17	4.57713929018268e-17	3.6646731121359e-17	5.07952304682793e-17	5.09534185589814e-17	4.24105996233768e-17	4.56211614914251e-17	4.54793856256632e-17	5.46297464013256e-17	3.01546492076944e-17	5.9244597037167e-17	1.7849366044484e-17	2.3999365340204e-17	1.19522074562025e-16	4.31702083686486e-17	4.64235699731472e-17	8.35508144278431e-17	4.79417668589924e-17	3.99329108233957e-17
2008220	0	6.47120718245399e-17	4.58860657755794e-17	3.70755803235117e-17	5.07364085270797e-17	5.00697342952364e-17	4.12757072182902e-17	1.10130256522196e-16	4.63889021956773e-17	5.98798247192252e-17	3.27244685231031e-17	5.7531319196987e-17	1.77329604856881e-17	4.25599330965214e-17	8.17105116156856e-17	3.88252522215414e-17	4.72643081242831e-17	1.03085569621235e-16	4.90681922900549e-17	3.97339443379255e-17
2008220	1	1.23660662611722e-16	4.62984593402232e-17	3.79091458259719e-17	5.01268590053699e-17	4.93741047405311e-17	4.04137254732862e-17	5.4499445046743e-17	4.76088059409661e-17	6.44631243070879e-17	5.27473169355354e-17	5.55169795578364e-17	1.76214757703556e-17	8.87008915446661e-17	7.32811821778098e-17	3.60127908439133e-17	4.79756507456233e-17	9.08947171931024e-17	5.39776841610332e-17	3.93188903825273e-17
2008220	2	1.23586228081633e-16	4.72815618883255e-17	4.0628643001241e-17	4.93179606312604e-17	4.83725880850498e-17	3.9773741512024e-17	4.11695552503222e-17	4.87518321813094e-17	9.59942378143099e-17	1.21394326827644e-16	5.3567142735284e-17	1.78393599594192e-17	8.46917043483034e-18	7.21601639376548e-17	3.42943256750531e-17	4.84825996107129e-17	8.38433287282849e-17	5.7103241568122e-17	3.89260254030522e-17
2008220	3	8.70558304335299e-17	4.80843706858585e-17	4.24930142086277e-17	4.85590413971828e-17	4.74116682892732e-17	3.94713361624746e-17	5.09675607338476e-17	5.03145172457838e-17	1.10197746047663e-16	1.18590955167968e-16	5.22399158905391e-17	1.80199054182264e-17	7.87787292973147e-18	7.07378877318131e-17	3.31965400949296e-17	4.77705797880731e-17	7.98987132185052e-17	8.42554476704582e-17	3.8233552513699e-17
2008220	4	7.02485149478347e-17	4.89390027758312e-17	4.30323295319156e-17	4.8062542439163e-17	4.66095913333438e-17	3.9284537983181e-17	7.62584155549613e-17	5.16108267532158e-17	9.36045996678852e-17	1.19220827159443e-16	5.12718656243061e-17	1.79889993549331e-17	4.05772402256243e-17	6.77680403658838e-17	3.27029561502316e-17	4.72682641731024e-17	7.77731882387196e-17	9.98281429097905e-17	3.72577485288894e-17
2008220	5	6.22558078015999e-17	4.98380321524385e-17	4.99048011634654e-17	4.75697314390856e-17	4.57687793693208e-17	4.13667757998998e-17	8.25924890172725e-17	5.23719347741228e-17	6.18663052770695e-17	1.21665595275128e-16	5.0968692443064e-17	1.80848661069578e-17	8.75740792129421e-17	6.37928159672509e-17	3.37879751026879e-17	4.9007064430072e-17	7.7187684149404e-17	9.21924479497657e-17	3.63245255267326e-17
2008220	6	5.67104116947363e-17	5.50406106353489e-17	5.95242224545598e-17	4.69421136463771e-17	4.48160924336516e-17	4.375419193696e-17	7.89807853325619e-17	5.46885253549056e-17	5.24182002462089e-17	1.22639245471493e-16	5.20327802480178e-17	1.826395341231e-17	9.08227851647084e-17	4.30924619991166e-17	3.71146573952171e-17	4.97995003694488e-17	7.61847318922396e-17	1.09675813329292e-16	3.5800502782842e-17
2008220	7	5.28740586563191e-17	5.87919214660107e-17	6.46603625883147e-17	4.65318536697381e-17	4.40672835171334e-17	4.67791358139777e-17	6.90914512695744e-17	5.60370742155999e-17	6.04767881645871e-17	1.23118079245341e-16	5.44529819142261e-17	1.97038156776334e-17	9.96273751487913e-17	2.48282200282218e-17	4.12675596023356e-17	4.80003882159895e-17	7.41238353586614e-17	1.18430582538406e-16	1.15666132856691e-16
2008220	8	5.02734454173438e-17	5.98841355166974e-17	6.2173046302581e-17	4.9316751789719e-17	4.44317851022152e-17	5.11264726532463e-17	1.23014176603725e-16	5.68046964895853e-17	6.05799191776819e-17	1.217572786799e-16	5.76267223240961e-17	2.34213565061049e-17	1.021355375906e-16	1.19272731530974e-17	5.81612907652932e-17	4.66493895117641e-17	7.42525267113663e-17	1.23114200603025e-16	1.03693860243873e-16
2008220	9	4.86921990879393e-17	6.27676689818824e-17	5.4217257548301e-17	5.58920632238758e-17	4.86892297898355e-17	5.84667751248987e-17	1.22452664489839e-16	5.73566970832835e-17	5.93554155705064e-17	1.20908078254018e-16	6.00469145795387e-17	2.61168570500428e-17	1.08541812544886e-16	5.21374051375249e-18	6.41980269291369e-17	4.76011181896362e-17	7.16123758397358e-17	1.23192119652938e-16	9.68778154900838e-17
2008220	10	4.79674530562614e-17	6.87054845042701e-17	3.74196079396651e-17	6.13102354059497e-17	5.47052935672299e-17	6.17367869233211e-17	1.20943323981543e-16	5.78316911898507e-17	5.90937444686231e-17	1.10991650725378e-16	6.14506967027185e-17	2.85565774040736e-17	1.08280204305501e-16	9.98481358974421e-19	6.28569408264266e-17	4.95405956240078e-17	6.68304980539088e-17	1.19499627122394e-16	1.11106675173439e-16
2008220	11	4.7408839312161e-17	7.12432204037111e-17	3.09750508171319e-17	6.3413241555883e-17	6.07405652164548e-17	6.28655197291655e-17	1.15863394889088e-16	5.84818866205646e-17	6.06330434872255e-17	1.19947933047911e-16	6.16616365296315e-17	3.06534055889163e-17	1.07303029076683e-16	1.94483309378038e-18	6.12696839586358e-17	4.64442936826131e-17	6.24965152548523e-17	1.23268950039748e-16	1.19843329877093e-16
2008220	12	4.67831253695589e-17	6.93244193483155e-17	3.09883328018028e-17	5.97189201951313e-17	6.20940304247244e-17	5.59017081272343e-17	1.20871282146939e-16	5.88228855117061e-17	8.95303496205971e-17	1.0221738470536e-16	6.10119321524553e-17	3.31140618337884e-17	1.06762426828059e-16	2.45145059370044e-18	6.00173350970614e-17	4.48684020777072e-17	5.82889632395289e-17	1.19413657317974e-16	8.69705964961493e-17
2008220	13	4.62802549109044e-17	6.44043135342155e-17	3.24551614240259e-17	5.67114696391857e-17	6.13927194481566e-17	5.02712185940767e-17	1.05201352631427e-16	5.88026773676535e-17	1.2256074790272e-16	1.14430764788345e-16	5.982857690024e-17	3.56678907669065e-17	1.06963508993758e-16	2.81583418936099e-18	5.90356579574168e-17	4.37346046242213e-17	5.44699078891061e-17	1.23025469504979e-16	7.46536162676766e-17
2008220	14	4.57705871911774e-17	5.74579867595046e-17	3.21354274365036e-17	5.53425940243725e-17	5.93875476084613e-17	4.53148176286179e-17	1.13275665076937e-16	5.86067756352501e-17	1.22881806202941e-16	1.2136585298874e-16	5.92077299282814e-17	3.81281339372649e-17	1.07870593972228e-16	2.78436666442496e-18	5.79862808023333e-17	4.09290966037746e-17	5.08279114993809e-17	1.22742799086453e-16	8.29293628146675e-17
2008220	15	4.65517109432587e-17	5.02369765645907e-17	4.11418997053798e-17	5.27933776708068e-17	5.6268830317974e-17	4.06455352292636e-17	1.17604029144402e-16	5.81867271409387e-17	1.22423855422367e-16	1.21992182837716e-16	6.11727904793461e-17	3.98005386568895e-17	1.0955803371069e-16	2.59604656320211e-18	5.67166167039133e-17	3.87222494959888e-17	4.72941914806809e-17	1.22771872667553e-16	1.01745236602227e-16
2008220	16	5.08618319443542e-17	4.56585584298474e-17	7.1028338356023e-17	4.94466284928151e-17	5.166860272702e-17	3.79342143702209e-17	1.22009559797456e-16	5.72190247167466e-17	1.21536412627948e-16	1.22057633995351e-16	6.33432981734057e-17	4.17541008172654e-17	1.10920163623711e-16	2.24604104323218e-18	5.5211540802622e-17	3.69939168014799e-17	4.434222370273e-17	1.19877706666644e-16	1.09088616560511e-16
2008220	17	1.2259196126749e-16	1.02713068267755e-16	7.86714745539734e-17	4.55158334218974e-17	4.71366956383975e-17	3.62444939293669e-17	1.21921003792347e-16	5.53963042447597e-17	1.20538160693452e-16	1.17243034132546e-16	6.18058976820391e-17	4.34756137653442e-17	1.18380026947659e-16	1.94798603244496e-18	5.39946734049222e-17	3.51252363302551e-17	4.21369654398577e-17	1.22705311794957e-16	1.11774248514518e-16
2008220	18	1.2251012787726e-16	9.30219891668125e-17	8.08421680804765e-17	4.25555782868118e-17	4.48779827547212e-17	3.52564728301369e-17	1.2113063852009e-16	1.1734868503125e-16	1.19759147283014e-16	1.17700496694358e-16	5.85784469877238e-17	4.46002739271556e-17	1.19158305813961e-16	1.53457817587045e-18	5.12541443464811e-17	3.42971736298219e-17	4.06301342710764e-17	1.22720440383243e-16	1.17504127634474e-16
2008220	19	1.14865859749406e-16	8.27780880221831e-17	1.02271461946617e-16	4.00613526113311e-17	4.44312605443344e-17	3.45532409579115e-17	1.19632784183424e-16	1.80958288949062e-17	1.17543943034442e-16	1.21292161597644e-16	9.35274339765918e-17	4.50116486615639e-17	1.0702582356545e-16	1.35812283923155e-18	4.81325208605959e-17	3.40674811561642e-17	4.03784777652422e-17	1.22926224455114e-16	1.15930508245596e-16
2008220	20	8.75102134496884e-17	1.1966463495853e-16	1.00867934057339e-16	3.76924286037746e-17	4.43433948083707e-17	3.44487504284572e-17	9.14081979194003e-17	1.95970230148226e-17	1.20022637861815e-16	1.20776994250416e-16	8.82943735950733e-17	4.57284359752843e-17	9.75607708359717e-17	1.35781991474165e-18	4.61314172382001e-17	3.39532518049124e-17	4.05486780950079e-17	1.16584214109983e-16	1.16531689351213e-16
2008220	21	9.34446419636905e-17	1.19224227786494e-16	9.82482970917058e-17	3.57324809064812e-17	4.31613494918808e-17	3.6951249205731e-17	2.75064381470846e-17	2.56811721733422e-17	1.16351012686128e-16	1.20653874303173e-16	6.56873040358791e-17	4.63862836597709e-17	9.73731880659377e-17	1.41541485804358e-18	4.42683744412266e-17	3.38527469731187e-17	4.0547499630109e-17	1.15450236897934e-16	1.15088465757741e-16
2008220	22	1.07552238883116e-16	1.18770641120302e-16	8.42588152493251e-17	1.09789589966225e-16	1.02189558904767e-16	4.59527803705861e-17	4.30767092185611e-19	9.86517230847285e-17	7.90924631039704e-17	1.20732228117361e-16	6.4948944615926e-17	4.66650341792325e-17	1.21317235320937e-16	1.55665877443049e-18	4.34031674832901e-17	3.3914149895523e-17	4.03901412953723e-17	1.17183307413545e-16	1.08459865849389e-16
2008220	23	1.14718400238265e-16	1.19330965788005e-16	1.01907624038973e-16	1.17790145352596e-16	9.00285651950773e-17	5.8495686593223e-17	5.14569519345295e-17	1.18453729211481e-16	4.67917721502926e-17	1.19745221057745e-16	8.87196498868727e-17	4.65826963135608e-17	1.23717084881748e-16	1.89533503761661e-18	4.22211190309782e-17	3.40539910753331e-17	4.0375978332983e-17	1.21558343262569e-16	1.06671215223069e-16
2008221	0	1.18464798152349e-16	9.25336113291249e-17	1.06862801267858e-16	9.68235489069295e-17	9.38530126682803e-17	9.36311429190562e-17	1.15157034919825e-16	1.17254281843615e-16	1.51929322092644e-17	8.58625202583805e-17	1.10990392723698e-16	4.55653731599848e-17	5.83480328736996e-17	2.4611870620051e-18	4.12562761807403e-17	3.40752364693294e-17	4.00312315046515e-17	4.221210036766e-17	1.06428433716748e-16
2008221	1	1.23325220264779e-16	9.98570925779128e-17	1.06524794355384e-16	1.21222626403951e-16	1.1705711927519e-16	1.08647454052453e-16	1.17623888082385e-16	1.17280585097011e-16	7.4834741223614e-17	1.01022463947679e-16	1.09357312011154e-16	3.81405028367878e-17	4.33781530279774e-17	3.32230455159597e-18	4.02145976534264e-17	3.40570191097387e-17	3.90849114713675e-17	1.22922793715775e-17	1.06333204695844e-16
2008221	2	1.22093327418414e-16	1.12088374960706e-16	1.05354430216884e-16	1.20812344311949e-16	1.18314656809611e-16	1.14074131296803e-16	7.97499188629159e-17	1.17790065537417e-16	1.15985066138535e-16	7.49039930071545e-18	9.64055602006865e-17	3.56409824717652e-17	3.83921113413743e-17	4.33174745993925e-18	3.89606814104064e-17	3.40865655838436e-17	3.79318015615344e-17	3.30341298036197e-18	1.06627982530014e-16
2008221	3	1.19155872502746e-16	1.10798425706184e-16	8.6103599466057e-17	1.20331546771187e-16	1.17514473708728e-16	1.14633405331345e-16	7.47384809879213e-17	1.17599364290029e-16	1.18778971057775e-16	4.58330171728292e-18	9.36050069336702e-17	3.54429969998597e-17	3.19888809356628e-17	5.64405426034916e-18	3.74809423665342e-17	3.43861904963018e-17	3.70984461105646e-17	4.57503056359784e-17	1.06937324108416e-16
2008221	4	1.15255616762784e-16	1.1003750147073e-16	7.86467512381869e-17	1.02219379824163e-16	1.1538515250894e-16	1.09870171723959e-16	7.44688270722788e-17	1.16605218509631e-16	1.20232754294706e-16	1.53651463114422e-18	9.85952377881167e-17	4.22568575146595e-17	2.50482843340637e-17	7.73023734565497e-18	3.70294964203789e-17	3.47070147803067e-17	3.65511496897685e-17	6.01535008224338e-17	1.0692381938599e-16
2008221	5	4.90118519542152e-17	1.07614028382909e-16	7.44351250170979e-17	1.1655417650921e-16	1.13494483863459e-16	1.07621859797447e-16	1.13944691572254e-16	1.13428137254092e-16	1.20264063880567e-16	1.64790904100569e-17	1.13110745189388e-16	4.61300091451192e-17	2.0131420449203e-17	1.01265469524284e-17	3.68335184701911e-17	3.46947236952535e-17	3.82384622607102e-17	1.090523355482e-16	1.06664748324914e-16
2008221	6	5.05596580741044e-17	1.06171854042012e-16	7.59944337104401e-17	1.06941200953838e-16	1.11971817189791e-16	1.014835661158e-16	1.14051617760393e-16	1.15347282061589e-16	1.20478713094658e-16	2.69486532156787e-17	1.12959727448651e-16	4.98828644947439e-17	1.98485190370466e-17	1.18760339053074e-17	3.67643304982151e-17	3.45369300914032e-17	1.09280678901157e-16	6.13229418791226e-17	1.06689113753726e-16
2008221	7	1.13828974743626e-16	1.01829882079999e-16	1.05598763384499e-16	1.10886368430495e-16	1.08880219191894e-16	1.07439764412019e-16	9.13992380526675e-17	1.14954547412336e-16	1.21076942478574e-16	7.44126281832058e-18	1.13639933434811e-16	4.95762734614846e-17	2.19417853016098e-17	1.5147987478906e-17	3.74596656244315e-17	3.68329045658788e-17	8.88673917791659e-17	3.55053720800996e-17	9.93890825609226e-17
2008221	8	1.13587211724817e-16	9.74904840006714e-17	1.00952336202498e-16	1.09931383432529e-16	1.0736838645069e-16	1.09688419942056e-16	9.94278738943164e-17	1.10466354512752e-16	1.21211880892862e-16	5.32626219240533e-18	1.14056273147322e-16	4.93973051409159e-17	2.4736248977593e-17	1.14184405479503e-16	3.85356707328614e-17	4.77991166339118e-17	9.25255698912753e-17	3.47547923573639e-17	9.00058225193213e-17
2008221	9	1.13306321727233e-16	9.00607753260853e-17	8.97078867037759e-17	8.97157474421722e-17	1.06944288745332e-16	8.85486194038556e-17	2.94721719740588e-18	1.08259780740943e-16	1.1498261553848e-16	7.53754513334735e-18	8.31477898442256e-17	5.07184034916007e-17	3.89501989218931e-17	1.14805405817563e-16	4.05642280066499e-17	5.76645048996311e-17	8.02099921925002e-17	3.30584820821509e-17	4.18732978678287e-17
2008221	10	1.13406108301088e-16	9.22539381828091e-17	9.89239863254058e-17	8.40898123928503e-17	1.06291498456634e-16	7.12440113640197e-17	1.01462662486732e-16	1.07267912630605e-16	8.65391233231172e-17	1.53851380593956e-17	3.97940946195748e-17	4.55412343848795e-17	6.30883763120163e-17	1.15112156360217e-16	4.39893202945457e-17	6.65675852544625e-17	8.09589785391908e-17	2.35092448808588e-17	1.41001848647471e-17
2008221	11	9.69582108875155e-17	9.19767923071485e-17	8.8108096318729e-17	8.18268009522186e-17	1.07374629423254e-16	1.02012936001842e-16	7.83683901028195e-17	1.0688741191142e-16	7.80489821423747e-17	2.2226038582498e-17	3.43834198862647e-17	3.85525779745512e-17	6.80536075245058e-17	1.1621156382434e-16	4.750893025054e-17	7.63184160416601e-17	1.13652990555391e-16	1.34760029166071e-17	2.35475912330829e-17
2008221	12	1.01279468423664e-16	8.06592015035374e-17	8.2372414487972e-17	7.92044966248218e-17	1.04565891876796e-16	8.31508287117621e-17	8.34348698775271e-17	8.96877469123666e-17	9.77914050623306e-17	1.09856677604477e-16	5.79540345827811e-17	3.7613743355493e-17	6.80243052017228e-17	1.15379497314483e-16	4.69039407206121e-17	1.05744418490081e-16	1.11935159947425e-16	7.67873505404018e-18	4.35260948435608e-17
2008221	13	1.12287521422507e-16	9.65531125970164e-17	8.88724889711951e-17	8.47332772439806e-17	1.01913701721539e-16	7.53797880669936e-17	5.14400236397695e-17	1.00543861702936e-16	1.82559023481689e-17	1.07998100082257e-16	1.003553837883e-16	3.91917633237967e-17	6.67692189906923e-17	1.12090191777233e-16	4.43126492103985e-17	9.46445363419787e-17	1.04027104917701e-16	7.09504624625302e-18	6.21424360399554e-17
2008221	14	1.15392110102597e-16	1.00608496468449e-16	7.58120896175519e-17	9.4018068068691e-17	7.92098319397321e-17	9.20196761015727e-17	1.05509201710971e-16	1.06342545932937e-16	2.37366135406426e-17	5.8830989242384e-17	9.73060323211254e-17	3.86621813985298e-17	6.63636105941633e-17	1.10949010138522e-16	4.17539698136541e-17	9.96057973791225e-17	1.07371204398792e-16	1.48135198821518e-17	7.95165657277507e-17
2008221	15	1.13954267252696e-16	1.04539436182214e-16	7.58810135553507e-17	9.62878992434976e-17	6.76747793631058e-17	8.98442648411076e-17	1.05386370937608e-16	7.25150784294813e-17	6.92649526572845e-17	4.62848561476321e-17	9.76884119402292e-17	3.77983095649501e-17	6.44842954381795e-17	1.09100000349577e-16	3.99116578281224e-17	1.08214446236974e-16	1.1019337317813e-16	2.58775501772637e-17	9.62904958109923e-17
2008221	16	9.41698237841199e-17	9.75865787469178e-17	6.57889629128236e-17	1.04484438448724e-16	1.00556776778982e-16	9.34265807971353e-17	1.05256484778487e-16	6.60033244296228e-17	9.7952689987703e-17	4.84906345729962e-17	1.11507316371007e-16	3.76435626553567e-17	6.1473297227705e-17	1.09441160721623e-16	3.8545402547466e-17	7.72608633637045e-17	1.08968915533254e-16	1.06329195834726e-16	1.06964704412111e-16
2008221	17	8.81102981018558e-17	1.05826892795422e-16	8.60813663551239e-17	1.00849324188902e-16	1.06740245582627e-16	9.85903297410949e-17	1.06006371890181e-16	1.05911335676875e-16	1.0775487237815e-16	5.36986396403569e-17	1.04863265379355e-16	3.72993309385996e-17	5.89937002165198e-17	1.09904844798008e-16	3.7438067963515e-17	6.8246533603879e-17	1.07253343256372e-16	1.06267713619474e-16	1.13035640310361e-16
2008221	18	8.82206563763339e-17	1.05436581204732e-16	1.01781676457456e-16	1.02737272705879e-16	7.37382242396001e-17	1.07287482116139e-16	1.07388130821022e-16	1.056088474894e-16	1.07494450100528e-16	1.06315234270561e-16	1.15083497592273e-16	3.50492369411194e-17	5.64922866771086e-17	1.1039005725505e-16	3.81053027711612e-17	7.42696140952024e-17	8.53837524040272e-17	1.06500521997515e-16	1.23764987577585e-16
2008221	19	9.06182988668534e-17	8.78075612968832e-17	1.059159125154e-16	9.79420349394874e-17	8.46031614039519e-17	1.09076010581378e-16	1.06332119520661e-16	1.06718044107608e-16	1.07416149590029e-16	1.06652837702467e-16	1.14382829193387e-16	2.25256006751717e-17	5.63824600334327e-17	1.10995085003691e-16	4.10082836472253e-17	9.09306888802162e-17	8.40052408246395e-17	1.06641212814819e-16	1.12477656882222e-16
2008221	20	9.32074916455727e-17	9.47964622392776e-17	1.06105960877613e-16	1.02229749102297e-16	1.06110505034361e-16	1.03336055370678e-16	9.19898652552559e-17	9.809247895942e-17	1.08428248954512e-16	1.01397824337428e-16	1.13533256497296e-16	1.03979134298797e-16	6.02948216653455e-17	8.62050425147829e-17	5.6178471891726e-17	1.11293197465396e-16	9.49403399409936e-17	1.06938902899451e-16	1.0656547653153e-16
2008221	21	9.14867543962337e-17	8.19898422444569e-17	1.06674680333501e-16	1.0595585881134e-16	1.07998575849154e-16	1.01728243372277e-16	7.88669880140749e-17	9.08350079229276e-17	1.04589366887621e-16	8.45647028341382e-17	1.12664117085146e-16	1.0598729165324e-16	6.72884087895307e-17	5.78360502853799e-17	7.69124638959335e-17	1.10392721040654e-16	1.08274970079383e-16	1.07161160249105e-16	1.06614998499267e-16
2008221	22	9.63827560568136e-17	8.63333886793924e-17	1.07165829883293e-16	8.84432131384065e-17	1.00171586784199e-16	1.05457828221136e-16	7.08550773506107e-17	9.02737616180603e-17	1.06974621670639e-16	8.61000575279995e-17	1.12980798844141e-16	1.04081881629192e-16	7.42081826016289e-17	4.38356639665357e-17	9.17580466835414e-17	9.33843006338314e-17	1.08091502354766e-16	1.07386349572496e-16	1.06655753202745e-16
2008221	23	1.02422454773034e-16	1.05751144767538e-16	1.07426595881316e-16	9.15455158017375e-17	9.21321879600896e-17	1.05393728520962e-16	6.79732917079471e-17	9.66149263066589e-17	1.0832230888146e-16	8.99980155197797e-17	1.13393246688618e-16	1.02113655652816e-16	7.87341309159313e-17	3.80070080643912e-17	7.15011767650706e-17	9.79006740144288e-17	1.07577861178956e-16	1.07573789584718e-16	1.06571587846728e-16
2008222	0	1.06316183565942e-16	1.0556566648669e-16	1.11514169685873e-16	9.48855181554193e-17	9.07479920392902e-17	1.05061421020756e-16	6.91858689215545e-17	1.00600304738553e-16	1.0804623534508e-16	1.07467069674194e-16	1.09362934970632e-16	1.03737820412543e-16	8.01601001869753e-17	3.54546040269504e-17	1.07707167177148e-16	1.08703859719825e-16	1.09400185121958e-16	1.07943476351184e-16	1.06818889562126e-16
2008222	1	1.05106180005431e-16	1.05322722805457e-16	1.16471544289072e-16	9.07705522872162e-17	9.34652428588028e-17	6.75675376688635e-17	7.16968421883854e-17	1.06774845326687e-16	1.02757757840287e-16	1.07259748114759e-16	1.03669234912711e-16	9.07775743782431e-17	7.97914728414385e-17	3.432004959989e-17	1.07540261212337e-16	1.10059922309383e-16	1.08355192567164e-16	1.08380632461386e-16	1.06787755323537e-16
2008222	2	1.10214173116984e-16	1.0533812555259e-16	1.17023455152766e-16	1.0602741676377e-16	9.8429368942393e-17	6.1845859623369e-17	8.43529082766256e-17	1.0672393699004e-16	9.78672949800725e-17	1.0715528676499e-16	5.16359888333097e-17	1.09054780796123e-16	7.94006314394013e-17	3.34201352292311e-17	1.0852765024901e-16	1.086502545774e-16	1.06646427921997e-16	1.08149904592703e-16	1.06865446429569e-16
2008222	3	1.11841528990579e-16	1.05622818885494e-16	1.07869349592898e-16	1.05487721123676e-16	1.07201676582135e-16	6.85772389743753e-17	1.06964244952392e-16	1.04471739280674e-16	9.95569585099701e-17	1.07220036736764e-16	2.26380066923939e-17	1.1414426164386e-16	7.72569957577525e-17	3.27242767552547e-17	1.09742370462224e-16	1.06365254396759e-16	1.0678481004242e-16	1.0941861927163e-16	6.33321437654054e-17
2008222	4	1.0818202181217e-16	1.05523166927511e-16	9.60809705849282e-17	1.05437710462828e-16	1.07125473627073e-16	7.18521770572125e-17	1.06672535906816e-16	1.07888103577427e-16	1.00201141872297e-16	1.07047839706573e-16	1.78025116659353e-17	1.04521315773683e-16	7.4698212014682e-17	3.20697356190518e-17	9.88836560728331e-17	1.05090643406211e-16	1.0712445513856e-16	1.1134581401424e-16	4.62193145920468e-17
2008222	5	9.89260519589161e-17	1.05492491907202e-16	8.85369670838744e-17	9.26477558881488e-17	1.06866020010603e-16	6.91657009405495e-17	1.06614186883061e-16	1.07577045550817e-16	1.00408579528189e-16	1.06953635842209e-16	1.60563697909939e-17	1.06272987867127e-16	7.28697394566077e-17	3.14435898068597e-17	8.74665827694704e-17	8.82406714938618e-17	1.07751887026812e-16	1.0846050330717e-16	4.01614150276093e-17
2008222	6	9.03956941255725e-17	1.05318410716787e-16	1.17798112229633e-16	9.54666901670132e-17	1.0683775906298e-16	6.77690787455524e-17	1.06709103539859e-16	1.07419183972392e-16	1.07223360614154e-16	9.88497803434707e-17	1.95427799540084e-17	9.29375785541328e-17	7.24869381314797e-17	2.92716813889053e-17	8.42944738670898e-17	8.76908347633553e-17	1.08789575461164e-16	1.05254794427324e-16	3.96297053511828e-17
2008222	7	7.94557527767771e-17	8.82555271077746e-17	1.19588753990855e-16	9.20019441242384e-17	1.067073684846e-16	6.55988724648548e-17	1.06906015774425e-16	1.02410260573039e-16	9.93599968605946e-17	7.33203656742085e-17	3.56875487010738e-17	1.0702819404563e-16	7.48218811560383e-17	2.61084348359573e-17	8.69401623173438e-17	2.69201451404384e-17	1.07774426265656e-16	1.04430908033578e-16	4.18484878946506e-17
2008222	8	7.00070442643677e-17	8.49035787120899e-17	1.20752765121591e-16	8.51067091278815e-17	1.04745185354126e-16	6.38349490481643e-17	9.61013620045085e-17	9.4884836371063e-17	9.72135510639024e-17	6.32883698346781e-17	1.09759199595949e-16	1.09309516692671e-16	1.22571533463752e-16	2.33645738473166e-17	1.07783886818463e-16	3.05061982439007e-17	1.07564936713321e-16	1.03352329529835e-16	4.83506961032039e-17
2008222	9	6.27719144663529e-17	7.61371979193379e-17	1.21333905719584e-16	7.90238467095124e-17	9.62986597900496e-17	6.30237064536277e-17	7.60879184024816e-17	8.55008012388763e-17	1.00958353727189e-16	5.32191632828418e-17	1.10926706180398e-16	1.07843621776602e-16	1.20904398114716e-16	2.17965610437995e-17	1.07263423224881e-16	3.82543807803658e-17	1.08774895644059e-16	1.00719434425666e-16	4.88918901673922e-17
2008222	10	5.71313956763875e-17	7.0356523439258e-17	1.20237738324847e-16	7.60059870873383e-17	8.86124091314336e-17	6.28226852611209e-17	6.28971563878969e-17	7.63480519639413e-17	1.0736531454603e-16	4.35377145782564e-17	1.11964251697955e-16	1.07332598406659e-16	1.01180133168337e-16	2.08870239245478e-17	1.06248802178652e-16	4.28304109804071e-17	1.07802804886296e-16	9.68825087264967e-17	5.14621017577453e-17
2008222	11	5.18885452853624e-17	6.6494419504982e-17	1.06157236000612e-16	7.33067829929615e-17	8.14164568638443e-17	6.43559364885779e-17	5.1872502910044e-17	6.90141629010253e-17	1.04588403681865e-16	3.55619122542647e-17	1.12590753008417e-16	1.06435626923276e-16	8.20927316358179e-17	1.9492040610314e-17	8.1323200134847e-17	4.386396651949e-17	1.03222094094418e-16	8.76198202548618e-17	5.12605160889337e-17
2008222	12	4.87020105714215e-17	6.26468876342825e-17	9.22260063357969e-17	7.30746536732936e-17	7.49604342147778e-17	6.33712681567969e-17	4.22815926301379e-17	6.28806726374973e-17	8.49259219715728e-17	3.13890577437983e-17	1.13025382349886e-16	9.82276119344836e-17	6.72444344726492e-17	1.76414038376264e-17	6.33439663445336e-17	4.32111979099962e-17	9.77649039039472e-17	1.01236244943323e-16	5.52343593091574e-17
2008222	13	4.54981203588229e-17	5.51898161880223e-17	8.22967463415077e-17	7.11829823789894e-17	7.0949332814314e-17	6.00624267158688e-17	3.50857778950656e-17	5.66935451594573e-17	6.86289350493761e-17	3.10215009013719e-17	1.1801221661209e-16	7.49374626065282e-17	5.88065983481091e-17	1.61183970302903e-17	6.24708722658418e-17	4.26512158755382e-17	9.49293244794432e-17	9.41626202449367e-17	5.90683601670758e-17
2008222	14	4.1009169905069e-17	4.68131861407452e-17	7.57986759375728e-17	6.59244513122225e-17	6.62876654987001e-17	5.60386607331184e-17	3.10416716619255e-17	5.14558653856945e-17	5.37423855928403e-17	3.49969097000546e-17	1.19969387007086e-16	3.9047686550199e-17	5.56288454472537e-17	1.49340976191624e-17	6.23816910867596e-17	4.38256126512045e-17	9.33807331616422e-17	7.18816172105274e-17	6.15654494097975e-17
2008222	15	3.34454052903283e-17	3.95638835725676e-17	6.90874765938575e-17	6.10984171235806e-17	5.98536944462981e-17	5.24669852056686e-17	3.20471195925602e-17	4.77967276616988e-17	4.26292757729415e-17	3.7539617752968e-17	1.18494803057345e-16	1.90647779288963e-17	5.41850214276104e-17	1.40286272160644e-17	6.55929612355539e-17	4.68285636950056e-17	9.45008042127115e-17	5.66801383488854e-17	5.8291233298893e-17
2008222	16	2.54766500586796e-17	3.35603096644807e-17	6.38544000309281e-17	5.87117444620167e-17	5.37774780893042e-17	5.23625585656667e-17	3.38436736411537e-17	4.42112317942299e-17	3.59046633964008e-17	3.60274339654819e-17	1.13323506840406e-16	1.14280441220122e-17	5.27621486075423e-17	1.34388783739028e-17	7.39008609612473e-17	4.59276866558072e-17	9.89803189715892e-17	4.8746168898928e-17	5.30038164251071e-17
2008222	17	2.0436669656336e-17	2.87979143587524e-17	6.04633295584626e-17	1.05140268937943e-16	4.93231842575834e-17	4.87014187147861e-17	3.3051590823938e-17	3.97893224723193e-17	3.4123676953517e-17	3.47119485570979e-17	1.01802124738109e-16	1.1607230933993e-17	5.08675611860331e-17	1.27907565287687e-17	8.06481378618947e-17	4.41197344229116e-17	1.07236095035859e-16	4.40596767638463e-17	4.90790930232153e-17
2008222	18	2.14196965399368e-17	2.62737622786202e-17	5.69346864770064e-17	1.05816216966987e-16	4.61315173780611e-17	4.49867207433532e-17	3.21686353084124e-17	3.42920152343193e-17	3.62562715177038e-17	3.20400024584855e-17	8.70356048994251e-17	1.49614240195224e-17	4.91406211002911e-17	1.20959010087661e-17	8.76302946254468e-17	4.32500967043198e-17	7.72720638556471e-17	4.22265951648897e-17	4.60619453197064e-17
2008222	19	2.85511354539116e-17	2.57221790136807e-17	5.48024894873693e-17	1.06639815220568e-16	4.21586736988803e-17	4.27576745537816e-17	3.07282599864603e-17	2.89373089033946e-17	3.72267260314504e-17	2.74343216315847e-17	7.5619284844804e-17	1.93958047558861e-17	4.72207226701055e-17	1.14430085586461e-17	9.16970740141249e-17	4.3151616841546e-17	6.42978186483419e-17	4.25239932420279e-17	4.39177067646259e-17
2008222	20	3.85367732575401e-17	2.74221942334819e-17	5.28987346710161e-17	6.50383265562322e-17	3.65300782024573e-17	4.21981598255857e-17	2.74948927182948e-17	2.45538047145276e-17	3.70334604878422e-17	2.323942310999e-17	1.1334181144893e-16	2.63880737812613e-17	4.49638192623291e-17	1.07798545752535e-17	8.82285734322729e-17	4.2545877647901e-17	5.81903125733111e-17	6.52513046509587e-17	4.26143529074744e-17
2008222	21	4.61796344160856e-17	2.99758905305959e-17	5.18093366737535e-17	4.63336214048964e-17	3.15243561702711e-17	4.23481433922332e-17	2.35847213695204e-17	2.12993834794142e-17	3.30670781630952e-17	2.35084790854898e-17	1.00335876482187e-16	3.55563001178796e-17	4.30794310989848e-17	1.01849718963316e-17	8.27371934836176e-17	4.11352985432748e-17	5.30815874019605e-17	8.8581396332985e-17	4.16816879672994e-17
2008222	22	4.37873382721774e-17	3.23636852338302e-17	5.09895177125072e-17	3.71610185310488e-17	2.75008507411147e-17	4.38605697273604e-17	2.179591690809e-17	2.07152851343022e-17	3.00391229129748e-17	2.96334753428623e-17	9.88153706027995e-17	1.11281112051617e-16	4.08380270497456e-17	9.68533985160042e-18	7.79873648707087e-17	4.04894414781058e-17	4.82236064422687e-17	8.28265730140568e-17	4.05813226117138e-17
2008222	23	3.91745152597571e-17	3.45664804761484e-17	4.99876486483719e-17	3.12496780597945e-17	2.3643943314837e-17	4.44955183387686e-17	2.29785115923055e-17	2.35020588953201e-17	2.79820699225918e-17	3.35311362906249e-17	1.03510469990672e-16	4.77104059391747e-17	3.53052579450384e-17	9.46661158154383e-18	7.37900923448442e-17	3.97372082577908e-17	4.47293443008562e-17	4.55533776508053e-17	3.93329815727823e-17
2008223	0	1.81727481075898e-17	3.62974075014811e-17	4.94769779116526e-17	2.77933373687079e-17	2.20873531188306e-17	4.44195675934283e-17	2.60756434227164e-17	2.83283921595869e-17	2.63512043946841e-17	1.19197092942317e-17	1.04795431980645e-16	4.76848855292256e-17	2.94667937169124e-17	9.87873580070342e-18	7.1985003444945e-17	3.92308492109521e-17	4.2571303610008e-17	3.13340025506384e-17	3.86559227662121e-17
2008223	1	9.3001011788223e-18	3.74661075230434e-17	4.92749245357599e-17	2.74176874143923e-17	2.21332126406904e-17	4.37370051998261e-17	2.79854557162001e-17	3.42722055864792e-17	2.50513048534007e-17	2.77443201516196e-18	1.04091283353684e-16	5.00762854129139e-17	2.45346184578396e-17	1.12236283580809e-17	6.97332752605533e-17	3.89740242939143e-17	4.12919772043599e-17	2.70602131960009e-17	3.89776400265209e-17
2008223	2	1.12360031842847e-17	3.88480694174004e-17	4.98523765486877e-17	2.92299141355058e-17	2.30348150327542e-17	4.28447362020935e-17	1.78813431647707e-17	3.79690128595876e-17	2.5367121695729e-17	1.23312429403498e-18	1.1308687219164e-16	5.26419712479962e-17	1.40911069349778e-17	1.2579983125584e-17	6.84065990270471e-17	3.89093059186508e-17	3.96925534092708e-17	2.57833354612176e-17	3.9169444720173e-17
2008223	3	2.01296997351088e-17	3.98906528407187e-17	5.32696737897078e-17	3.22726471559484e-17	2.58370034407613e-17	4.19751921424376e-17	1.51723022956288e-17	3.66632706773005e-17	1.395995156405e-17	6.40321340485628e-19	8.97520613028998e-17	5.55481075360312e-17	5.3460012520419e-18	1.27325067334728e-17	6.75063295880574e-17	3.90519397498401e-17	3.67475202686167e-17	2.37256626168119e-17	4.15714858728726e-17
2008223	4	2.19831044887002e-17	4.04706449957745e-17	5.30362445179033e-17	3.52735246640598e-17	2.93829280137506e-17	4.12224133648628e-17	3.86797036330326e-18	3.3128242153325e-17	7.25024700824744e-18	2.93408675711867e-19	8.67231449809697e-17	6.01536817298439e-17	7.14557133739088e-19	1.279924404992e-17	6.87673174360086e-17	4.09442995279484e-17	3.37755801969792e-17	9.75485125281467e-18	7.79122713052624e-17
2008223	5	2.48824497972558e-17	4.09172007029564e-17	5.57727913936394e-17	3.74871677497017e-17	3.30261701241343e-17	4.06577465087972e-17	1.62045746708922e-18	3.32615567666534e-17	3.71126316007751e-18	1.48787297740323e-18	8.21604592581782e-17	6.80908503349902e-17	1.81426237981419e-19	1.32679790588128e-17	6.97162599020684e-17	4.26951368760832e-17	3.51297288992903e-17	2.84357985290527e-18	1.00779800984739e-16
2008223	6	1.7693965060898e-17	4.16218634212759e-17	5.91696333613005e-17	3.90852963691175e-17	3.51077022193757e-17	4.14305464507146e-17	2.84006138222637e-18	3.24783937028947e-17	1.44639410464085e-18	9.28472957163982e-18	8.88824412063838e-17	7.46583782883921e-17	1.64995843674301e-19	1.48574305719813e-17	7.02123583340025e-17	4.33627576061055e-17	3.97851058445536e-17	7.39804131137035e-19	9.87500631454879e-17
2008223	7	4.49327408277173e-18	4.19068346085888e-17	5.91388921194515e-17	3.97557296401417e-17	3.63903698090266e-17	4.38368036467507e-17	8.46775820152729e-18	3.53912882022641e-17	5.55777355547911e-19	1.7384824043699e-17	9.2638148434289e-17	8.12911756232301e-17	1.53925161504037e-19	2.0384542295883e-17	6.99265994746651e-17	4.43574326022232e-17	4.30547420340383e-17	5.25027622755057e-19	5.55221912807542e-17
2008223	8	1.72079878329635e-17	4.13618190791429e-17	5.46594204085856e-17	3.99344666061343e-17	3.70742965527433e-17	4.46077450731232e-17	1.52877319320282e-17	5.1143703816476e-17	2.35753771960336e-18	3.06953364718253e-17	9.75085604166061e-17	9.11491670716433e-17	6.67050811795471e-19	2.90368815022656e-17	7.26924448559064e-17	4.14147120461484e-17	4.24654330411725e-17	5.8240161697698e-19	4.39827716765359e-17
2008223	9	2.57509292667389e-17	4.03944124579008e-17	5.25299815808665e-17	4.12791074380141e-17	3.77725813884814e-17	4.48067844109479e-17	2.0449135696675e-17	1.00955771879133e-16	7.67058797585586e-18	6.0793181361208e-17	1.03892053295476e-16	9.75009155809363e-17	6.49478535174783e-18	3.57234622911155e-17	9.64741375375121e-17	3.80939152859628e-17	3.91009350361433e-17	2.26704074178769e-18	3.99117582498323e-17
2008223	10	1.42809834398363e-17	3.99953563860271e-17	5.09554492850295e-17	4.26774991282692e-17	3.92912820235874e-17	4.450830553389e-17	2.97426761133893e-17	1.00463813594945e-16	1.49387833431632e-17	1.00351649556821e-16	1.16935860299537e-16	8.92005264841387e-17	1.00969929752083e-17	3.73359652982331e-17	1.06554812459587e-16	3.4633457513587e-17	3.53722646588935e-17	6.85637429619115e-18	2.89206541587412e-17
[truncated: 493 more rows]
