# Supplementary material for: A comparison of sea salt emission parameterizations in northwestern Europe using a chemistry transport model setup
Source: Copernicus journal article supplement (doi:10.5194/acp-16-9905-2016), 2016-08-08
Supplement: Supplementary file 2 [file acp-16-9905-2016-supplement.zip › conc/conc.timeseries.values.win2008.base.Na.DE0001R.csv]

doy	hour	pm2.5	pm10
2008001	0	0.346861224843804	1.88221611578272
2008001	1	0.344007895628311	1.58650486853041
2008001	2	0.335151113536753	1.32348017900936
2008001	3	0.337113004829021	1.36891047762069
2008001	4	0.361344922239318	1.53551221409762
2008001	5	0.365752095276547	1.50280857619469
2008001	6	0.364483841429394	1.57938143291172
2008001	7	0.368972203426415	1.84022394825166
2008001	8	0.355557360092271	2.06578900891768
2008001	9	0.336669247918061	2.28330564910077
2008001	10	0.328743871755852	2.4324490815697
2008001	11	0.296449172120279	2.00240722956548
2008001	12	0.254923629027972	1.53372619109184
2008001	13	0.229390554044712	1.23799804299177
2008001	14	0.215036358740428	1.0537836868799
2008001	15	0.202522201816649	0.923730356826457
2008001	16	0.192943512376474	0.852844475749897
2008001	17	0.183798468261428	0.838835024468174
2008001	18	0.179948754814749	0.850995478696524
2008001	19	0.177268188348335	0.873522462432456
2008001	20	0.176487831817425	0.893416174955625
2008001	21	0.175971779961307	0.904800498958137
2008001	22	0.174250118323204	0.907240738666353
2008001	23	0.168964572978891	0.896392344809294
2008002	0	0.163922250943325	0.864962458407432
2008002	1	0.15923541510242	0.81984835822401
2008002	2	0.157869930826704	0.804911137187663
2008002	3	0.159950406136508	0.850975163265031
2008002	4	0.168462473990434	0.900214210945115
2008002	5	0.175803810270166	0.927201350761998
2008002	6	0.179097191420866	0.937765433350058
2008002	7	0.168022957947237	0.925088605831957
2008002	8	0.140314752449179	0.874736839406315
2008002	9	0.0981357060500261	0.811858555470902
2008002	10	0.0721730027736007	0.673820346301343
2008002	11	0.0821224513996789	0.604038492016304
2008002	12	0.127869853605086	0.742870267326874
2008002	13	0.135221077699836	0.719468185811289
2008002	14	0.133518953774073	0.741710547106661
2008002	15	0.13587733389129	0.764453699071209
2008002	16	0.141096766672481	0.754366129514606
2008002	17	0.163452256580642	0.763134130569588
2008002	18	0.19391891930201	0.824345953307116
2008002	19	0.19670957191652	0.912248703326327
2008002	20	0.141613859677276	0.971320717053168
2008002	21	0.0756934978172967	0.870767269444798
2008002	22	0.0649685214662184	0.769189605648361
2008002	23	0.0559834081921518	0.734846386124951
2008003	0	0.0495387218819824	0.733265728492907
2008003	1	0.0473271542435394	0.776456423858264
2008003	2	0.0476114860227934	0.849879035523208
2008003	3	0.0429835949764171	0.869169790009624
2008003	4	0.0401968423512247	0.868622607973007
2008003	5	0.0369047628436168	0.839211399273931
2008003	6	0.03894019992418	0.868555170833492
2008003	7	0.0442067900848244	0.947885873149338
2008003	8	0.0469903932913052	0.96063659845815
2008003	9	0.0494773040042526	0.938159796612407
2008003	10	0.0520191304094413	0.9669934399002
2008003	11	0.0526669441539791	1.00316497551514
2008003	12	0.0513529527356599	1.00335587904855
2008003	13	0.0514153528811758	1.00535348099175
2008003	14	0.0529812910704393	0.990044089633023
2008003	15	0.0538372391918143	0.997979271883934
2008003	16	0.0599233058769153	1.08446203338544
2008003	17	0.0677207076890191	1.18189233765243
2008003	18	0.0748969796149377	1.21181255500026
2008003	19	0.0749682066179949	1.13359385399833
2008003	20	0.0755792193128338	1.0884953156247
2008003	21	0.0710639151641605	0.977467225915824
2008003	22	0.0619680741627474	0.89309588823166
2008003	23	0.0621505904816395	0.910988250244919
2008004	0	0.0622617250268525	0.866025046825421
2008004	1	0.0633147852871955	0.818028116846265
2008004	2	0.0608055507991754	0.765547394310706
2008004	3	0.0612497883061771	0.761053616849961
2008004	4	0.0622911409871931	0.760080324986034
2008004	5	0.0645209314118513	0.763837995093118
2008004	6	0.0622310932438881	0.744739864615748
2008004	7	0.0597378032816125	0.740382443186222
2008004	8	0.0611263981580771	0.757469790851343
2008004	9	0.0617749260314192	0.760814534570547
2008004	10	0.0638464142777523	0.779763006522277
2008004	11	0.0657424780486683	0.803848754280707
2008004	12	0.0684017401844656	0.850539276674076
2008004	13	0.0715088379973652	0.895353518750232
2008004	14	0.0717153373322852	0.914859839864748
2008004	15	0.0723457381514051	0.934549300691981
2008004	16	0.0742134722077002	0.952665821484966
2008004	17	0.0776336239710922	1.00975990611185
2008004	18	0.0753912710673532	1.01946813211329
2008004	19	0.0684303329120785	1.02450856354814
2008004	20	0.0711872502783805	1.11494071756222
2008004	21	0.0747564551574868	1.19788955871043
2008004	22	0.0800074263334765	1.27691757215406
2008004	23	0.0801235492915852	1.29228401528804
2008005	0	0.0859505757883505	1.37695495158676
2008005	1	0.0940068958382734	1.557514572628
2008005	2	0.100848921413744	1.81847044325071
2008005	3	0.111225694232972	2.07374960665519
2008005	4	0.134017739499594	2.49890360730542
2008005	5	0.135875151991942	2.73882683526645
2008005	6	0.130298280765968	2.70887086818751
2008005	7	0.117266726278344	2.48494269114289
2008005	8	0.106772572734404	2.45318565956158
2008005	9	0.107236872611496	2.47541044520599
2008005	10	0.105889688010645	2.64555275077794
2008005	11	0.0928184031343562	2.49144721521106
2008005	12	0.0703517818823902	2.25685016177093
2008005	13	0.0579767125416734	2.12917996757675
2008005	14	0.0954949386180263	3.20217132260199
2008005	15	0.113425115098264	3.6582237323131
2008005	16	0.110950194533517	3.48020335210538
2008005	17	0.123658773670429	3.16717702196075
2008005	18	0.157521057424269	3.29417783183741
2008005	19	0.198339860430284	3.7279158359633
2008005	20	0.203817442525137	4.1317992045716
2008005	21	0.151982082012669	3.91721176633923
2008005	22	0.170676750742962	3.73893822948125
2008005	23	0.245602052954196	4.45170763226745
2008006	0	0.28804748573888	4.72600061007346
2008006	1	0.305241329308103	4.52533564127032
2008006	2	0.295178661432645	4.29775982433013
2008006	3	0.245364892902777	3.77924906229589
2008006	4	0.152777751930308	2.33383111964354
2008006	5	0.13508564922859	2.36260489796811
2008006	6	0.128189598252655	2.33922708402516
2008006	7	0.100846635415759	2.18826597003051
2008006	8	0.094049061351421	2.14704088889271
2008006	9	0.100305323505321	2.18245882459074
2008006	10	0.12994067145219	2.48835179768823
2008006	11	0.196755572539409	3.16437327663235
2008006	12	0.285074937346852	3.94086423625721
2008006	13	0.357925778994934	4.43869684899084
2008006	14	0.397499724667915	4.51072644262278
2008006	15	0.401782429902267	4.41189453974261
2008006	16	0.39242260882741	4.2743020484983
2008006	17	0.376510071869164	4.0205559598184
2008006	18	0.348620379754147	3.53890260614553
2008006	19	0.318501610924321	3.11164089958661
2008006	20	0.301461894542294	2.8502632721171
2008006	21	0.311759958828847	2.86777695016372
2008006	22	0.330736584608407	3.04887784932437
2008006	23	0.343700743650066	3.23989313281246
2008007	0	0.344284940944014	3.34403480692893
2008007	1	0.328189193299621	3.36653793282191
2008007	2	0.307221646553393	3.4779125117558
2008007	3	0.273002301921458	3.21215725212472
2008007	4	0.221771633570304	2.76504956553099
2008007	5	0.184930697362972	2.63388796880619
2008007	6	0.157124294817567	2.46160862629328
2008007	7	0.128666758050381	2.28597909023127
2008007	8	0.112908035713228	2.22346382983621
2008007	9	0.10041122253799	1.94768019438726
2008007	10	0.0930511511625688	1.46730964279431
2008007	11	0.0829239522580096	1.00646236644712
2008007	12	0.0717490035701259	0.669550404697216
2008007	13	0.0626768772605443	0.468408006296413
2008007	14	0.0592811187570373	0.420196139176702
2008007	15	0.0638030583810716	0.460801076130343
2008007	16	0.0718095805787693	0.507586047132582
2008007	17	0.0770033798952243	0.493521802182043
2008007	18	0.0807143378659253	0.476760654932957
2008007	19	0.0749690397455649	0.73600959662713
2008007	20	0.0460427456156891	0.648777083803672
2008007	21	0.108987651628308	1.86988078222109
2008007	22	0.252721570906514	4.40524324336165
2008007	23	0.249281469685292	4.34792363744318
2008008	0	0.196763649542595	3.74488753016103
2008008	1	0.136388586086044	2.91663402369185
2008008	2	0.124176736233122	3.17456205131252
2008008	3	0.17267897709846	4.3740513533487
2008008	4	0.309776656168375	6.50223391692146
2008008	5	0.428140037927111	7.50287880307659
2008008	6	0.375911355062054	6.22712101032721
2008008	7	0.264249301002462	4.54815051088818
2008008	8	0.183713386571371	3.74051982111303
2008008	9	0.0981406570081396	2.22537368368652
2008008	10	0.14490711205668	2.96371636968056
2008008	11	0.221819084160611	4.13547199007475
2008008	12	0.22003022794621	4.10725252403945
2008008	13	0.207466869990434	3.72398131580213
2008008	14	0.133601162836681	2.66834876176558
2008008	15	0.0903091921710695	2.29327286024732
2008008	16	0.109061503662646	2.66575934852433
2008008	17	0.181119061125484	3.69287656335711
2008008	18	0.17679957642976	3.83257713516683
2008008	19	0.176029912791443	4.05067326679804
2008008	20	0.250378958941157	5.20986149601751
2008008	21	0.342581771585918	6.34352472333679
2008008	22	0.384960744682007	6.8182713726178
2008008	23	0.346709093270852	6.2196965304205
2008009	0	0.247515263532939	4.23828548407129
2008009	1	0.181851557698004	3.27323874883623
2008009	2	0.198673988596345	3.69887621466969
2008009	3	0.20343383856231	3.91512866990431
2008009	4	0.190899548580092	3.83236626508402
2008009	5	0.186517506898807	3.85442127541726
2008009	6	0.187119908761693	4.26291838765463
2008009	7	0.228763212089329	5.39138385095723
2008009	8	0.151835365044832	4.17442736993974
2008009	9	0.193860772916096	4.24432666895673
2008009	10	0.25653281570013	5.01746668405922
2008009	11	0.289037583944735	5.76896696486239
2008009	12	0.359535607866384	6.98048805724967
2008009	13	0.378701817152908	7.03694053718747
2008009	14	0.369025604661936	6.81461205298258
2008009	15	0.362034382728324	6.55021919374614
2008009	16	0.341440713813407	6.1707212264344
2008009	17	0.308045052668424	5.71461072288541
2008009	18	0.281093212715942	5.14323541273548
2008009	19	0.276102414733289	4.95472784576827
2008009	20	0.255321181979515	4.56980223753937
2008009	21	0.22751853773527	4.09201304197959
2008009	22	0.205175116453906	3.54709242960093
2008009	23	0.162682531031078	2.997853487733
2008010	0	0.153025526172552	2.90205493907216
2008010	1	0.160140876613851	2.88407977852766
2008010	2	0.196181932051107	3.63756798765744
2008010	3	0.277275855572972	4.77364607572069
2008010	4	0.35826196657318	6.71483921568925
2008010	5	0.387535246368213	8.27057272702428
2008010	6	0.428074266676439	9.6816118455555
2008010	7	0.459314885752605	10.1640119491125
2008010	8	0.478153664591333	10.1915173709071
2008010	9	0.466727785749603	9.70197857971625
2008010	10	0.442326927849486	8.94933075772176
2008010	11	0.422181486850562	8.27919537777155
2008010	12	0.411187383806631	7.65358557242975
2008010	13	0.341260259169491	6.32746827388794
2008010	14	0.265423325962314	4.8042774387447
2008010	15	0.217786599599471	4.2709920215329
2008010	16	0.201981878562465	4.27706869046165
2008010	17	0.19371150095931	4.33696934875026
2008010	18	0.166131111416944	3.48297322606468
2008010	19	0.176524671607294	4.42545423490037
2008010	20	0.188832489344169	5.1310602496011
2008010	21	0.249448173137161	6.2166291753553
2008010	22	0.361730073490808	8.42487752406623
2008010	23	0.379008948139995	8.91339480163336
2008011	0	0.43985272136917	10.1352325942019
2008011	1	0.514603598044291	10.8723240139208
2008011	2	0.554443806789883	11.2765741967461
2008011	3	0.537450598185807	11.2254012533302
2008011	4	0.526921403970679	10.1768857865733
2008011	5	0.495210091398693	8.74399772105197
2008011	6	0.417133555078266	7.66669306646684
2008011	7	0.180874433396947	3.31916395715996
2008011	8	0.0855773343800205	1.84860790669167
2008011	9	0.0619635322126381	1.29257383218441
2008011	10	0.141068814357156	2.0101695244689
2008011	11	0.183382995219843	1.94948637226527
2008011	12	0.183200157037884	1.73062095819204
2008011	13	0.198776671200761	1.83046753645599
2008011	14	0.220290809612204	2.03831643314684
2008011	15	0.217064521404852	2.211610447329
2008011	16	0.0818207766738314	1.05437935619764
2008011	17	0.0526697059691655	1.1051408762137
2008011	18	0.175630132188624	3.62266651525505
2008011	19	0.255850570384922	5.32546538184098
2008011	20	0.26686337923495	5.46330115119396
2008011	21	0.285140996253158	5.36995772747592
2008011	22	0.306856663984214	4.73678250162829
2008011	23	0.195710229876471	3.27996310640921
2008012	0	0.193988617365764	2.88283496906336
2008012	1	0.188259561262256	2.57057003336016
2008012	2	0.187256551045847	2.48327951110966
2008012	3	0.165759705230197	2.54754977569783
2008012	4	0.113035805822261	2.49647978723626
2008012	5	0.117606761285962	2.66350401520975
2008012	6	0.138085131049604	3.30993839491225
2008012	7	0.128428362066749	3.27477620126285
2008012	8	0.119345264146273	3.26292233217932
2008012	9	0.135166701446439	4.06343114236164
2008012	10	0.139481954160169	4.08188683807742
2008012	11	0.108536476108652	2.79701171061238
2008012	12	0.0843717610254485	2.09483108407176
2008012	13	0.108193326871569	2.76473340494529
2008012	14	0.133774583515236	3.3072768224173
2008012	15	0.171049632822427	3.68021142932453
2008012	16	0.208222001974158	3.38432781131949
2008012	17	0.161286716956965	2.26741735046545
2008012	18	0.125856889874757	1.86346919053253
2008012	19	0.126368007171881	2.11099907234127
2008012	20	0.161101257778894	2.81020067654641
2008012	21	0.208910920795508	3.45404184560833
2008012	22	0.206368740083059	3.42205398809143
2008012	23	0.16799480902351	2.87233971071161
2008013	0	0.15373635892032	2.52922365360898
2008013	1	0.132741805912942	1.96002310224686
2008013	2	0.12549546635596	1.78537307119392
2008013	3	0.11732810139795	1.81389292803253
2008013	4	0.125327933200368	2.18567159290313
2008013	5	0.158136711928364	2.75741805616162
2008013	6	0.122791380077431	2.13809349878475
2008013	7	0.118714192693224	1.98059316351843
2008013	8	0.127954258282644	1.86904252164496
2008013	9	0.132676188875595	1.84552084456341
2008013	10	0.130491203738377	2.07782694550192
2008013	11	0.130503176098781	2.35212610186819
2008013	12	0.140757603230304	2.48801404235894
2008013	13	0.152215928255223	2.48805810980331
2008013	14	0.16239368422325	2.58662099864048
2008013	15	0.172139209321368	2.75916208695507
2008013	16	0.173346495590406	2.79643990211784
2008013	17	0.169092245983006	2.78591730202895
2008013	18	0.163264066132284	2.77423211725318
2008013	19	0.145658708771743	2.6209703989173
2008013	20	0.124469969612698	2.48557290270848
2008013	21	0.115520577090534	2.35060692875416
2008013	22	0.11345228574311	2.18323122679533
2008013	23	0.11048223321505	1.89821255845071
2008014	0	0.111708173872197	1.67776510414043
2008014	1	0.119566335419663	1.68638252392306
2008014	2	0.120249735959959	1.76411995366627
2008014	3	0.113244329411761	1.9344353198535
2008014	4	0.102855580079468	2.06064436562277
2008014	5	0.0967177712420769	2.07146409586917
2008014	6	0.100722326603327	2.16101766421688
2008014	7	0.107082073589723	2.21083676743049
2008014	8	0.117380781310453	2.37150986489974
2008014	9	0.133948584662077	2.54943475024349
2008014	10	0.136385616143662	2.54365250083629
2008014	11	0.132785689040576	2.51117426019489
2008014	12	0.127732281305666	2.64689303755739
2008014	13	0.128023680210869	2.89382900357824
2008014	14	0.142585775699229	3.24115684773945
2008014	15	0.129489166901372	3.06875835261143
2008014	16	0.13604356250766	3.17540093485387
2008014	17	0.156293617680895	3.65452601366853
2008014	18	0.15578013638303	4.0215083609435
2008014	19	0.146539268201823	3.98286125158804
2008014	20	0.146305561617657	4.00393503201179
2008014	21	0.143641260525239	3.84089269805847
2008014	22	0.152743666800978	3.99912355274618
2008014	23	0.200253879733797	5.10562146149449
2008015	0	0.241707520149043	6.05977352478606
2008015	1	0.235222361565407	6.23210683468515
2008015	2	0.198213658777588	5.43337728931468
2008015	3	0.123729537345679	3.88870280797976
2008015	4	0.0955316918697923	2.97787143995575
2008015	5	0.132238430140478	3.45172405694701
2008015	6	0.166793145084656	4.09571184967152
2008015	7	0.180360577700451	4.297405127376
2008015	8	0.245548617774235	5.09826713178408
2008015	9	0.269327489909351	5.0169489633794
2008015	10	0.169883988390465	3.11371549543247
2008015	11	0.200332159539328	3.5164044332526
2008015	12	0.179165683895669	3.2573975534978
2008015	13	0.122489077718059	2.85498264190156
2008015	14	0.0969468732671934	3.05527593068719
2008015	15	0.110823330689482	3.53610253179361
2008015	16	0.115260455176669	3.77573154580785
2008015	17	0.116574024936451	3.71274288598998
2008015	18	0.119381984368713	3.97016037360964
2008015	19	0.126562352818668	4.28521875417809
2008015	20	0.125072516029767	4.14731022005833
2008015	21	0.11681142586643	3.91893039072641
2008015	22	0.0994257583794259	3.29118069257702
2008015	23	0.082225841329879	2.76711521621175
2008016	0	0.072172282144557	2.58487704054725
2008016	1	0.0857221753941569	2.98086266343617
2008016	2	0.144777405601343	4.56477489248808
2008016	3	0.15341601057917	4.5743264929919
2008016	4	0.149880965483496	4.11452781093276
2008016	5	0.178705398732719	4.51437992068629
2008016	6	0.216989814353517	5.5773031084002
2008016	7	0.217387513248842	5.19508542250812
2008016	8	0.251784517650339	5.57791020371983
2008016	9	0.269785612993592	6.05821416876685
2008016	10	0.26995404139601	6.10448283449151
2008016	11	0.271182941846965	5.7608273279026
2008016	12	0.264792775781738	5.25282662205673
2008016	13	0.253719788343856	5.09073458233395
2008016	14	0.252179897641935	5.12971581356742
2008016	15	0.236292665530704	4.74519823759547
2008016	16	0.249035688815828	4.8719779508694
2008016	17	0.260511576004005	5.04663124869623
2008016	18	0.252680316009913	4.83167203737827
2008016	19	0.294291890866627	5.187045979123
2008016	20	0.428255682856021	6.81287945817178
2008016	21	0.542229692568428	8.25494136235813
2008016	22	0.547279373009796	8.33656575436555
2008016	23	0.481128605031529	7.64767912079175
2008017	0	0.394503191616821	6.25874945306756
2008017	1	0.3630569581359	5.60704551868994
2008017	2	0.349276129807373	5.18161416261108
2008017	3	0.35209857465022	4.98352072459033
2008017	4	0.342412790552122	4.70170151944349
2008017	5	0.323263976222976	4.31978682151816
2008017	6	0.302318594150522	3.90383612646178
2008017	7	0.303746545437188	3.77510228163977
2008017	8	0.304034398161705	3.65419684394126
2008017	9	0.293129580464632	3.46448593275871
2008017	10	0.296502124398195	3.35602559184436
2008017	11	0.317867827705951	3.24099282217671
2008017	12	0.325137882680001	3.21211940574344
2008017	13	0.211272878260152	2.26486868231978
2008017	14	0.0980913837837054	1.3910491654755
2008017	15	0.0731870646609511	1.29030328128859
2008017	16	0.0770932460497512	1.50460434529035
2008017	17	0.0865681987857683	1.74106520779341
2008017	18	0.0899414935927541	1.79061576261754
2008017	19	0.0903146145421386	1.86423092145413
2008017	20	0.0740722150601495	1.67701577229212
2008017	21	0.0530949513219989	1.46332529038947
2008017	22	0.0479660460687164	1.52960829087201
2008017	23	0.0411629534557782	1.14700983148827
2008018	0	0.0971484472584399	2.22125202959168
2008018	1	0.138578696844461	2.8954436593779
2008018	2	0.130575582769507	2.92152639926132
2008018	3	0.123742797465795	2.78948993514633
2008018	4	0.0934409602736392	2.45049670427799
2008018	5	0.0814429500457108	2.04684333488648
2008018	6	0.0832374070118619	2.00771853697434
2008018	7	0.116668000510767	2.67378078578721
2008018	8	0.172546097500591	3.97609416128014
2008018	9	0.200319631792116	4.24220607498846
2008018	10	0.241867240788386	4.80114000702478
2008018	11	0.256887556878955	4.86785328546648
2008018	12	0.265536893351126	5.45604163814146
2008018	13	0.402790456386977	7.10920908378776
2008018	14	0.474598032142598	7.49029338687231
2008018	15	0.517815691888854	7.55823265530706
2008018	16	0.451191259256783	6.38771352957131
2008018	17	0.35829892907886	5.01754909626057
2008018	18	0.265955918553989	4.05753814128546
2008018	19	0.167629434635492	3.34471860647346
2008018	20	0.162143051327507	4.60406021370372
2008018	21	0.152372155533602	4.98056232184387
2008018	22	0.143312504826319	4.59222234018192
2008018	23	0.122103375856878	3.35110974813823
2008019	0	0.2521193629754	5.38255044473732
2008019	1	0.371190255033443	7.82615465264323
2008019	2	1.19636888326696	19.4368839815563
2008019	3	1.56740216370704	20.1204997787561
2008019	4	0.879886532584624	13.7611555445964
2008019	5	0.87375611027234	15.7246834128756
2008019	6	0.487071229309577	10.1678159193871
2008019	7	0.526227715095757	10.8934989205107
2008019	8	0.444198278420524	9.44342014631557
2008019	9	0.326236390139107	7.15420200360947
2008019	10	0.28530656386707	6.11855893708291
2008019	11	0.277156328342564	5.75225378107745
2008019	12	0.302402539118625	5.87379538458124
2008019	13	0.341178313755573	6.08952233286911
2008019	14	0.349937536640011	5.99538516726759
2008019	15	0.35062657822005	5.87536483727581
2008019	16	0.447147762381195	7.04923034786047
2008019	17	0.524023483174637	8.02436259464459
2008019	18	0.50148669408272	7.61427518244593
2008019	19	0.368057755843926	5.67886030425627
2008019	20	0.285461434322275	4.72035058007086
2008019	21	0.286503316539534	4.69441326060728
2008019	22	0.307238337206856	4.90738012391704
2008019	23	0.310323676627402	4.79604048712674
2008020	0	0.303121345282317	4.38596003737799
2008020	1	0.294672912600205	4.01125385645301
2008020	2	0.289936952057374	3.66068430057357
2008020	3	0.291088792277026	3.36331001475252
2008020	4	0.287396249691049	3.03978108163569
2008020	5	0.279847859211961	2.77475016533127
2008020	6	0.274304683381626	2.70192831101262
2008020	7	0.271570153491992	2.68079287653331
2008020	8	0.251460582129837	2.53015536615185
2008020	9	0.23238903931036	2.34442199073537
2008020	10	0.229786510706101	2.30005612809215
2008020	11	0.230553191064386	2.25285200530245
2008020	12	0.225901896482732	2.14266877878572
2008020	13	0.195870369455143	1.88802745240912
2008020	14	0.144766415591387	1.49515496094116
2008020	15	0.118582061596734	1.20593780307323
2008020	16	0.101060925713773	1.02064506486559
2008020	17	0.0994794622436816	0.998983819484395
2008020	18	0.106228875911499	1.06439625653519
2008020	19	0.108075625558423	1.14239466358201
2008020	20	0.102466384418878	1.19752556437278
2008020	21	0.0879079460058629	1.26517451770629
2008020	22	0.0966688087133558	1.61743763433057
2008020	23	0.128895024119316	2.09622604113038
2008021	0	0.154393925933239	2.50785197651261
2008021	1	0.165968614836103	2.78384234325899
2008021	2	0.181510570923347	3.15412972131413
2008021	3	0.204818225051439	3.55778094363883
2008021	4	0.22262687019966	3.85590050997283
2008021	5	0.221185725763346	3.89581567737655
2008021	6	0.225466813989045	3.89842265350827
2008021	7	0.226669492555606	3.85805941105147
2008021	8	0.233942388588853	3.87543542884473
2008021	9	0.246513746848117	3.86228725047352
2008021	10	0.24776854965616	3.69969323068161
2008021	11	0.250843296357493	3.55943315420217
2008021	12	0.252599739926728	3.42023836825362
2008021	13	0.256793078351099	3.26211257412637
2008021	14	0.251738445627528	3.03551112057128
2008021	15	0.236541248504206	2.86802323334597
2008021	16	0.219176525169226	2.67674813971818
2008021	17	0.173371395683911	2.19277876532742
2008021	18	0.150677174942215	1.90848337185281
2008021	19	0.22191953464165	2.49673412282679
2008021	20	0.316445615055867	3.13178833646383
2008021	21	0.40815369940043	3.60076075182492
2008021	22	0.497667782887931	4.36284630099972
2008021	23	0.521481740595107	4.72799314339773
2008022	0	0.49164818884988	4.86220478867467
2008022	1	0.504308048543605	4.88040781949519
2008022	2	0.508883187216815	4.53257480026506
2008022	3	0.413319513152444	3.63210648280482
2008022	4	0.156125754374186	1.60111202798251
2008022	5	0.102284106683044	1.25444273346293
2008022	6	0.210318913333425	1.93221783268213
2008022	7	0.393675591296865	2.9752420583634
2008022	8	0.469541779652418	3.12760367314164
2008022	9	0.462046050238104	2.73675278504435
2008022	10	0.325587527294018	1.87705216959608
2008022	11	0.263322152090453	1.65463780721242
2008022	12	0.253526106290511	1.5838183478448
2008022	13	0.263441811813346	1.55774730564197
2008022	14	0.275657814838345	1.52512306006164
2008022	15	0.271347335231171	1.4459052662825
2008022	16	0.24439761872495	1.40858586737912
2008022	17	0.192992727486524	1.39231459532782
2008022	18	0.202676225990734	1.92175440593425
2008022	19	0.226007409852341	2.22155954461041
2008022	20	0.252353380800281	2.26154280480038
2008022	21	0.266638331616798	2.23456249725559
2008022	22	0.264186302520611	2.12805676620115
2008022	23	0.253150435349841	1.98871064795891
2008023	0	0.244661080303448	1.87834691931622
2008023	1	0.239320384500306	1.84247607034347
2008023	2	0.24208630010423	1.93166181070027
2008023	3	0.242744720136285	2.10040520351777
2008023	4	0.23927891634063	2.29783800134753
2008023	5	0.211242581547958	2.36043448254252
2008023	6	0.223854065762534	2.54865622048713
2008023	7	0.275718664981939	2.82697196997157
2008023	8	0.2870944148377	2.96641158602036
2008023	9	0.226686320260264	2.59005421344992
2008023	10	0.187639482908062	2.84147635655625
2008023	11	0.144736440186744	2.63436771143176
2008023	12	0.115809394270542	1.9031410646319
2008023	13	0.113636482438942	1.64822452398733
2008023	14	0.121690795588675	1.63880339674035
2008023	15	0.132207982285056	1.58865320464395
2008023	16	0.142146554470359	1.45606352188211
2008023	17	0.17752937876135	1.68444612538183
2008023	18	0.294014127037076	2.30087915791795
2008023	19	0.387538243210802	2.83882777132951
2008023	20	0.431269064116061	3.29619277361408
2008023	21	0.499845949668914	4.08051764594252
2008023	22	0.588337317667422	4.99393180483512
2008023	23	0.620998584213817	5.3730006650669
2008024	0	0.625045684810976	5.88142755322417
2008024	1	0.635479378305697	6.47472446002949
2008024	2	0.778874943086855	8.29035825199963
2008024	3	0.916298743729872	9.02204196111843
2008024	4	0.949613196328335	8.65393805897732
2008024	5	0.931471533785518	8.27218045256797
2008024	6	0.920232688253699	8.34251303225735
2008024	7	1.06741996999404	9.42712940659339
2008024	8	0.804020488625734	9.24576971931191
2008024	9	0.321534911079604	6.92491475980786
2008024	10	0.36191568480943	7.31461962426131
2008024	11	0.398085600283171	7.72972095101234
2008024	12	0.388485946896563	7.19321976072739
2008024	13	0.329028987864626	6.27640999749668
2008024	14	0.344132762909869	6.86136120565523
2008024	15	0.378582030121586	7.76298883017252
2008024	16	0.385784509271822	7.95317583561799
2008024	17	0.379132967272134	7.43915511785659
2008024	18	0.329534598903705	7.11231933482687
2008024	19	0.324803723305187	7.20188189965439
2008024	20	0.368354189393317	7.44558166712999
2008024	21	0.375524134751395	7.60133906830577
2008024	22	0.35974097881088	7.39027848469178
2008024	23	0.382129815669577	7.64178204186329
2008025	0	0.40717570919809	7.76556459599401
2008025	1	0.369642718374238	7.07807419124413
2008025	2	0.341579695832976	6.76918554096156
2008025	3	0.30719486829665	6.24113772410207
2008025	4	0.296975877813677	6.09550230632086
2008025	5	0.369317408780423	7.72961027564722
2008025	6	0.430311816750005	9.25721083034413
2008025	7	0.508264092376537	10.902763012251
2008025	8	0.572671553833167	12.6130279009424
2008025	9	0.655367256623872	14.4349622971725
2008025	10	0.671564358084858	15.2591678142612
2008025	11	0.605068992434709	14.3577833262017
2008025	12	0.436513594880695	10.3957730534215
2008025	13	0.560179431496822	12.8699490620177
2008025	14	0.624884281276968	13.7708695483157
2008025	15	0.612590300258847	13.5650258337191
2008025	16	0.639188541184249	14.0832786215088
2008025	17	0.623655960276219	13.1280005064781
2008025	18	0.623075409116718	13.034017043254
2008025	19	0.623343648804214	12.8258409156103
2008025	20	0.59223586942438	12.0815145295679
2008025	21	0.55973739464218	11.4822953358957
2008025	22	0.542542795991745	11.2589594163573
2008025	23	0.544838199255794	11.4740147411863
2008026	0	0.531464448408632	10.9582379261745
2008026	1	0.483541995043939	10.4036051860673
2008026	2	0.467351209150773	10.4715782705097
2008026	3	0.471102129360707	10.7294053960344
2008026	4	0.44580729742178	10.5143358572268
2008026	5	0.45447620348907	11.3335680862692
2008026	6	0.498456945817943	12.223286097478
2008026	7	0.502580358444076	12.0845101057445
2008026	8	0.45487178725092	11.5776905457632
2008026	9	0.389081508170733	10.9691445481176
2008026	10	0.32878391167923	7.61509242685112
2008026	11	0.250490617001004	4.90439798622911
2008026	12	0.302693018609515	6.07602358319102
2008026	13	0.336855438075877	6.77439779200304
2008026	14	0.336657397259143	6.75178024902832
2008026	15	0.294169026404879	6.57173642458774
2008026	16	0.217740916175688	5.1918210181477
2008026	17	0.380837211557834	8.25007931215756
2008026	18	0.544598514562121	10.8507215643973
2008026	19	0.60722357307671	11.5071966051463
2008026	20	0.626647879468684	11.6814474848179
2008026	21	0.604175440801759	11.1647148196412
2008026	22	0.546478756713237	10.032428289224
2008026	23	0.483184663014593	8.64886259786784
2008027	0	0.411925404247932	7.28893740629808
2008027	1	0.328550137087167	5.77696758884875
2008027	2	0.260683875522909	4.60880234251201
2008027	3	0.191653736708628	3.46452339486985
2008027	4	0.0869701634049739	1.58296373265887
2008027	5	0.050878710207614	0.880853185006945
2008027	6	0.0324568220348043	0.561882402301261
2008027	7	0.0239106943127659	0.431775145314086
2008027	8	0.0325823877114397	0.690150418235715
2008027	9	0.0390719177103546	0.949264738267074
2008027	10	0.0416006383821135	1.1046614707273
2008027	11	0.0443190006672679	1.1463050660416
2008027	12	0.0559821317538249	1.22504557279781
2008027	13	0.103731687324321	1.46355584996123
2008027	14	0.23469301159299	2.1562489329129
2008027	15	0.522269687867028	3.88352609176919
2008027	16	0.77997803900956	5.13320929553363
2008027	17	0.926477699508564	5.18973982728434
2008027	18	0.966041656252242	5.48311313191065
2008027	19	0.952083592362534	5.58259987573488
2008027	20	0.943002271606324	5.76161851898184
2008027	21	0.929932021599612	6.03016128660816
2008027	22	0.915147651113626	6.61066337499317
2008027	23	0.847007609473279	7.43658936834548
2008028	0	0.793612557751908	7.44223040488956
2008028	1	0.777425672225429	7.11903812625911
2008028	2	0.704306931802926	6.15877336065924
2008028	3	0.619702635300405	5.02905379131003
2008028	4	0.536759303802255	4.31282839691706
2008028	5	0.473356839341884	4.11360209489611
2008028	6	0.422749624578973	3.9976656645413
2008028	7	0.417249099927037	3.82476087017622
2008028	8	0.367687591841083	3.25485541548836
2008028	9	0.335886385753163	2.67920211890394
2008028	10	0.316514192886378	2.24610729601209
2008028	11	0.278881586562903	1.73349571805308
2008028	12	0.210910884676819	1.27319052014452
2008028	13	0.193208634463704	1.17781822572189
2008028	14	0.188664992834212	1.18380235955966
2008028	15	0.187500445118018	1.43569396980169
2008028	16	0.190279168414829	2.04422010049408
2008028	17	0.168396792657859	2.19284537954728
2008028	18	0.158884175174941	2.07633669340639
2008028	19	0.156842950114937	2.00532870440161
2008028	20	0.15935838595444	1.90576981260596
2008028	21	0.146357878583939	1.70952378706763
2008028	22	0.13958874345557	1.61382531457057
2008028	23	0.142361423094782	1.6707043034893
2008029	0	0.149469469632688	1.82099135487677
2008029	1	0.164621377874985	2.08371591031605
2008029	2	0.187443338956934	2.34896492404048
2008029	3	0.198577149064287	2.46723238011217
2008029	4	0.201650185112254	2.52000317417745
2008029	5	0.193219783964908	2.47915980235524
2008029	6	0.179910585221995	2.31572439713997
2008029	7	0.160791369074873	2.12757009150351
2008029	8	0.150903274867424	1.99787315249617
2008029	9	0.147129842954913	2.0486047681132
2008029	10	0.151269736616835	2.25151156977741
2008029	11	0.162429954406911	2.4659377898294
2008029	12	0.168964258760983	2.70410983089495
2008029	13	0.167983883849027	2.95395237924402
2008029	14	0.164725018558686	3.11030996909459
2008029	15	0.183705843187328	3.39737401334168
2008029	16	0.182805539639496	3.71840504314232
2008029	17	0.180246464192635	3.83958747719347
2008029	18	0.165694186038609	3.918117056897
2008029	19	0.163624799401718	4.02848091277411
2008029	20	0.171318969351911	4.08408637430659
2008029	21	0.18111294322841	4.14649324776988
2008029	22	0.194533869381894	4.28093745915815
2008029	23	0.213250471671192	4.54523089066504
2008030	0	0.193510987106126	4.11586815513879
2008030	1	0.141578196390267	2.93853343454343
2008030	2	0.0570463107240952	0.998885043887503
2008030	3	0.0424589097324021	0.616366741244421
2008030	4	0.116219941858028	1.50382004270335
2008030	5	0.143987228899146	1.73831857025432
2008030	6	0.151007522738129	1.92148375329865
2008030	7	0.264496011496177	3.48140062069718
2008030	8	0.281751098419683	3.56661751882171
2008030	9	0.231242210801427	2.83023343054977
2008030	10	0.229712279344636	2.77340683193494
2008030	11	0.252750938215507	3.21160906464332
2008030	12	0.258300107208119	3.27727339643323
2008030	13	0.188609617446495	2.55517890995598
2008030	14	0.133996865647758	2.37122724902438
2008030	15	0.0896608920333983	1.82936393267981
2008030	16	0.129661787938806	2.31850763655638
2008030	17	0.290331939136152	4.81534608976037
2008030	18	0.30926637349581	5.05171741352429
2008030	19	0.31565940832779	4.9200451502303
2008030	20	0.291865173952736	4.35408531627983
2008030	21	0.232444395031031	3.32882063956736
2008030	22	0.178447866753488	2.52946044865622
2008030	23	0.169742741702461	2.43449797545816
2008031	0	0.179886954037901	2.56100756950543
2008031	1	0.207735171170021	2.98723934916837
2008031	2	0.21520810720732	3.21061714011502
2008031	3	0.216222519544224	3.34884550235816
2008031	4	0.224846288218427	3.72852298752183
2008031	5	0.239451485756735	4.24790104202082
2008031	6	0.255538006767909	4.7626110886183
2008031	7	0.260331143637413	5.015078285722
2008031	8	0.240768651180126	4.70747453600263
2008031	9	0.225481275713592	4.49446675903025
2008031	10	0.195019746461342	4.56624635600169
2008031	11	0.182404112686676	4.51075087253361
2008031	12	0.192766690297906	4.76839151013797
2008031	13	0.220752760847756	5.44637885359828
2008031	14	0.247933838784487	5.80956389907818
2008031	15	0.243616420262799	6.03058074312152
2008031	16	0.193255405513996	5.72257909454906
2008031	17	0.164537408798212	5.15643622830152
2008031	18	0.189100610948978	4.98996065858243
2008031	19	0.302070068534194	6.9667888027783
2008031	20	0.362748949938863	7.98081920584884
2008031	21	0.391099347852084	9.12855498440278
2008031	22	0.470852321066584	9.94668623245336
2008031	23	0.557129800443172	11.1840492231821
2008032	0	0.576086075083811	11.6787787730591
2008032	1	0.586150538761186	12.0855761245242
2008032	2	0.551032630418175	11.4859362626464
2008032	3	0.477904259393602	10.9214378327356
2008032	4	0.512669056265057	10.4825116632703
2008032	5	0.521002001061345	11.2450505094837
2008032	6	0.298177262251116	7.21706585852655
2008032	7	0.227129454225218	6.37058946636848
2008032	8	0.283042962402982	6.86470953646165
2008032	9	0.608049741681706	11.47731515243
2008032	10	0.702960903229702	13.3387557154677
2008032	11	0.723699810582502	13.7529200941334
2008032	12	0.72953882725849	13.8054191833372
2008032	13	0.735492421830009	13.4679290095448
2008032	14	0.780507619725366	13.7430139532859
2008032	15	0.766215601446678	13.445537513896
2008032	16	0.591405183635874	10.7635458833741
2008032	17	0.449586821678905	7.70707887807861
2008032	18	0.569936766445461	8.21852706686947
2008032	19	0.415056035489387	7.84350626132967
2008032	20	0.200311635297114	3.77069646193041
2008032	21	0.484263714699735	9.79507703141965
2008032	22	0.206877189731902	4.96814256686541
2008032	23	0.54915556515277	10.3331296794119
2008033	0	0.991415535060302	16.4658437421923
2008033	1	0.870137744592126	15.1171573690721
2008033	2	0.800466730616776	13.8091032957831
2008033	3	0.751400665891913	12.8284596208592
2008033	4	0.379260449747289	7.89347351892631
2008033	5	0.160121267842421	3.88334730726728
2008033	6	0.360326758622448	7.70006636023993
2008033	7	0.637597912691857	13.2087051259962
2008033	8	0.609831756995065	10.5795932066784
2008033	9	0.561159655920955	9.90392628957052
2008033	10	0.451929502299771	9.25241594783475
2008033	11	0.564380481665298	10.4821986851577
2008033	12	0.491040912505617	9.38672447321618
2008033	13	0.422189145640226	7.75194616387874
2008033	14	0.33659994547483	5.98576072221522
2008033	15	0.348762471895005	5.9359976974504
2008033	16	0.428584635004816	6.78662245917266
2008033	17	0.362406659088811	5.58904249310645
2008033	18	0.274397977311083	3.97963559971347
2008033	19	0.277551701913137	3.92019648859616
2008033	20	0.351879905948468	5.11521089038915
2008033	21	0.316972179841357	4.70731892864027
2008033	22	0.258099894206759	3.76739802642931
2008033	23	0.259583623735655	3.51349239143241
2008034	0	0.279275809376635	3.52456002625316
2008034	1	0.277613811442357	3.60370516820146
2008034	2	0.268208032357729	3.63174582602312
2008034	3	0.243302613352697	3.26779759691449
2008034	4	0.245140791502747	3.33980742622992
2008034	5	0.282880782209748	3.88532398417469
2008034	6	0.353385309494642	4.17066903029821
2008034	7	0.416516347567623	3.93512366714925
2008034	8	0.416018900083429	3.71398284015851
2008034	9	0.388585879536701	3.78667803580843
2008034	10	0.376119151115968	3.87441904885144
2008034	11	0.344503496650278	3.45325263720528
2008034	12	0.302603114905454	2.90216755774662
2008034	13	0.292486726128167	2.62701360216903
2008034	14	0.308653016202066	2.81932101042933
2008034	15	0.272641024999342	2.82309765252083
2008034	16	0.239594193128115	2.49134431449707
2008034	17	0.186124366704732	1.71655760315051
2008034	18	0.163883727839154	1.46905965235064
2008034	19	0.184035735323734	1.67507108147408
2008034	20	0.192819735231222	1.7602148050011
2008034	21	0.187292991731738	1.71411135415126
2008034	22	0.193889361369174	2.0708921881638
2008034	23	0.201136983966825	2.2906424172219
2008035	0	0.215227554794525	2.46189255543916
2008035	1	0.22281572356463	2.49701104703435
2008035	2	0.220215431895273	2.4674088197402
2008035	3	0.212230274081444	2.51112791253833
2008035	4	0.18937749075167	2.44433446225342
2008035	5	0.168940407170042	2.35162948143414
2008035	6	0.158816150886419	2.35828368808078
2008035	7	0.149306245362024	2.32665653701814
2008035	8	0.14578530437475	2.27747272696932
2008035	9	0.143260605131802	2.19329629168366
2008035	10	0.138744282832781	2.02573208148443
2008035	11	0.126717512152525	1.74752790106399
2008035	12	0.110721101272816	1.46799430097303
2008035	13	0.114410967518843	1.45041843946819
2008035	14	0.119291378521135	1.54068203544183
2008035	15	0.107536001069494	1.56289937406699
2008035	16	0.0954567333645495	1.69202017547226
2008035	17	0.0937497915455763	1.90196365319908
2008035	18	0.0934553496966616	1.72657763273688
2008035	19	0.134985146599793	2.13494496233533
2008035	20	0.178788459685903	2.74988134683164
2008035	21	0.198892512603045	2.91027214579427
2008035	22	0.196997282211109	2.85177547493671
2008035	23	0.181772927366666	2.80541143568977
2008036	0	0.156281812493242	2.77466405262175
2008036	1	0.107935443314337	2.56437556124148
2008036	2	0.0782961043070242	2.31212297292158
2008036	3	0.108851693612088	2.74498774791239
2008036	4	0.165057790786283	3.31761728992582
2008036	5	0.145577737207493	3.28560869098596
2008036	6	0.130591989189159	3.02408053674708
2008036	7	0.118504756079994	2.74441812512703
2008036	8	0.120557707228417	2.68357888183502
2008036	9	0.118085897408432	2.82708102760134
2008036	10	0.147320449435758	3.65533668489092
2008036	11	0.10959274885065	3.28627499353972
2008036	12	0.0618741614469173	1.99634988966068
2008036	13	0.0610811588840757	1.97792503166781
2008036	14	0.110358718381257	3.77221608379541
2008036	15	0.144640212469967	4.88264575801206
2008036	16	0.124347232792429	4.38719896404639
2008036	17	0.148092052958445	5.08619463208348
2008036	18	0.165008826958419	5.1310323720913
2008036	19	0.178497945420312	5.01303489583836
2008036	20	0.167030359608908	4.81724903691341
2008036	21	0.162169427566707	4.9655850912424
2008036	22	0.152738341245308	4.37821900175405
2008036	23	0.144608948247737	4.12585885244504
2008037	0	0.145494805168611	4.15314291273382
2008037	1	0.154864541853396	4.25664223366953
2008037	2	0.150596607114634	3.78005847578614
2008037	3	0.197666530581077	3.8054812102973
2008037	4	0.22081587818669	3.60366622664069
2008037	5	0.208293523182609	4.13179582905439
2008037	6	0.213391499714315	4.39376825189948
2008037	7	0.32629909266946	7.33493799665826
2008037	8	0.374836704620368	8.78834650860385
2008037	9	0.425117532757648	8.79116568126189
2008037	10	0.537530032008503	10.2722788815495
2008037	11	0.568206664650718	10.4831684816502
2008037	12	0.59694121352853	10.7427186556407
2008037	13	0.627584006232153	10.9376018474564
2008037	14	0.619106153916358	11.1708997062779
2008037	15	0.627035966911293	12.0326751431014
2008037	16	0.711134980281848	12.6907061633996
2008037	17	0.647471765875477	11.7572003053077
2008037	18	0.505147789538882	9.38187116123478
2008037	19	0.486546308367154	8.41711555237362
2008037	20	0.472139388439512	8.61432374856252
2008037	21	0.37493474100025	8.01401080327435
2008037	22	0.311647377567737	6.82582765825368
2008037	23	0.29236976316636	6.27989349434068
2008038	0	0.291059924596106	6.03072097781917
2008038	1	0.317814661339199	6.34203091996334
2008038	2	0.353594903354972	6.68987406018739
2008038	3	0.369711128182964	6.68904107720952
2008038	4	0.333449506128815	6.03250824404405
2008038	5	0.297248542677215	5.56959803798076
2008038	6	0.285878298621662	5.37678441452421
2008038	7	0.261925647974432	5.24849488517376
2008038	8	0.265404330957275	5.07366141008169
2008038	9	0.301471897468719	4.74010869810362
2008038	10	0.323194866262801	4.11779134046731
2008038	11	0.289853703942305	3.0915470685033
2008038	12	0.25980141422078	2.54025894161523
2008038	13	0.22943482284667	2.21783241882368
2008038	14	0.198770646402516	1.94259042975809
2008038	15	0.188026166404229	1.87282874667974
2008038	16	0.200060017591622	2.11906028511277
2008038	17	0.234242673006485	2.52328344891515
2008038	18	0.259695906923658	2.64596643293877
2008038	19	0.274520312089248	2.63177021963604
2008038	20	0.279601041610352	2.54654752061292
2008038	21	0.279488138505144	2.48054200050113
2008038	22	0.287386521923286	2.71927273706739
2008038	23	0.306279488747175	3.2204640963774
2008039	0	0.332573083377898	3.76792003248971
2008039	1	0.350709011580655	4.2589687116588
2008039	2	0.317591030783082	4.11477713801853
2008039	3	0.280004018737586	3.81994197596526
2008039	4	0.251636508735009	3.43006713217354
2008039	5	0.223153223023061	2.94953612117833
2008039	6	0.195474147363218	2.57661947427566
2008039	7	0.188622387562571	2.31722395800329
2008039	8	0.198544702571318	2.26764398913901
2008039	9	0.211862769657911	2.41178925628991
2008039	10	0.238573261114707	2.68504548017303
2008039	11	0.266693487411479	2.75287619916562
2008039	12	0.278852895668755	2.83274868875985
2008039	13	0.273851141254377	2.80840291040476
2008039	14	0.256545191607222	2.76514622639378
2008039	15	0.25544016035428	2.71951834713951
2008039	16	0.247270208202668	2.521646977239
2008039	17	0.203014050632493	2.1146614578827
2008039	18	0.182882984067037	1.98714691420544
2008039	19	0.176423061751704	2.01429369277413
2008039	20	0.169928793843385	1.93386488280466
2008039	21	0.159564229154603	1.74796790500531
2008039	22	0.143250160513845	1.58503869056208
2008039	23	0.132686425891614	1.56061599590859
2008040	0	0.131087081141921	1.63136665588319
2008040	1	0.135394362797909	1.73319890058864
2008040	2	0.1306852663585	1.78982849929492
2008040	3	0.117387190820889	1.73804289551243
2008040	4	0.107183716493271	1.64411553282012
2008040	5	0.102531647479271	1.57756822427184
2008040	6	0.104874303313186	1.57423429339613
2008040	7	0.114907567961574	1.6564204101213
2008040	8	0.128520738973496	1.74105208248062
2008040	9	0.137297341021315	1.78544156533439
2008040	10	0.143043660850744	1.81985642539931
2008040	11	0.147975197771745	1.83318895964145
2008040	12	0.146462525885347	1.8099430618206
2008040	13	0.145788041582041	1.7998296860365
2008040	14	0.143718518324353	1.76572732622745
2008040	15	0.139943229443752	1.68564199527724
2008040	16	0.13713467230048	1.60788921742365
2008040	17	0.136482499249286	1.54503687215411
2008040	18	0.145457669876774	1.55583186973226
2008040	19	0.161704905524792	1.64303228509292
2008040	20	0.173633512480935	1.65596484705359
2008040	21	0.177287667777862	1.61289360038297
2008040	22	0.179622648333574	1.59036591432168
2008040	23	0.186300298500119	1.60981971155652
2008041	0	0.193308334920771	1.65302529531741
2008041	1	0.198190616226023	1.70007055411595
2008041	2	0.201652431058955	1.75365255716888
2008041	3	0.202874943148831	1.79696617365725
2008041	4	0.199897553351008	1.80909480708372
2008041	5	0.198188206588166	1.78784998915432
2008041	6	0.194624029937884	1.74550965260474
2008041	7	0.18970470452394	1.694692089473
2008041	8	0.184930766323151	1.63929848394089
2008041	9	0.183301772222117	1.5967593187182
2008041	10	0.18531732971663	1.59794237719122
2008041	11	0.187334713076072	1.61927410865548
2008041	12	0.186223133138906	1.62633541024907
2008041	13	0.184751402164877	1.63509465475994
2008041	14	0.189171166862086	1.62926186259488
2008041	15	0.200779435158091	1.66461064092319
2008041	16	0.205148485063501	1.66894878023725
2008041	17	0.20152311068979	1.62462583729733
2008041	18	0.19547811870901	1.56679835081561
2008041	19	0.188272327337864	1.50893472049287
2008041	20	0.182203515181501	1.47483909713942
2008041	21	0.175877181322463	1.45150315248076
2008041	22	0.167527045436991	1.43900546969139
2008041	23	0.16352692870881	1.42633905485392
2008042	0	0.156754542541127	1.41675948227116
2008042	1	0.153722665370761	1.41748824293864
2008042	2	0.149081994740062	1.42182972594331
2008042	3	0.143453366308517	1.41508538636528
2008042	4	0.13796312477144	1.40642158875856
2008042	5	0.136870193967391	1.41197651728224
2008042	6	0.134790740652652	1.43836416274343
2008042	7	0.134125875200957	1.42998629240421
2008042	8	0.130710902704209	1.37387477356837
2008042	9	0.125376671010147	1.28707217383119
2008042	10	0.120583681062444	1.20089814339252
2008042	11	0.118031976779285	1.13217382272682
2008042	12	0.115270456094885	1.07753121682146
2008042	13	0.103239411950692	1.04904292198069
2008042	14	0.0951258479023213	1.214520254005
2008042	15	0.109174558384128	1.89181766162359
2008042	16	0.136923851628821	2.83565706382548
2008042	17	0.149571498702157	3.33670331410206
2008042	18	0.151053639953032	3.37475529581651
2008042	19	0.158748485979808	3.34806171342883
2008042	20	0.166121218906466	3.21206561661601
2008042	21	0.160629088811467	2.81807365730542
2008042	22	0.166362012523139	2.73556611044477
2008042	23	0.187282599587629	2.75328740757044
2008043	0	0.195479622644829	2.73509022333504
2008043	1	0.202912572469667	2.69081948309744
2008043	2	0.216040902113952	2.62969126079642
2008043	3	0.231555438328359	2.52641033444613
2008043	4	0.228095322546213	2.35494706470735
2008043	5	0.209738528882155	2.09146824554076
2008043	6	0.183429092416083	1.84162617314003
2008043	7	0.161452828957108	1.69818521362477
2008043	8	0.146548778791859	1.57747265234383
2008043	9	0.132623252434484	1.47489693881315
2008043	10	0.125017754162773	1.45586124522858
2008043	11	0.122127480864648	1.49356605735163
2008043	12	0.122754504877625	1.56545713957619
2008043	13	0.124243559824538	1.67859559875671
2008043	14	0.129326137195383	1.83479208294697
2008043	15	0.134896060613263	1.98486527501864
2008043	16	0.138799419073054	2.14160128094823
2008043	17	0.147145444910185	2.35409677489525
2008043	18	0.155435067951375	2.55028721282588
2008043	19	0.159915584900869	2.64806456355691
2008043	20	0.158242920571256	2.55746703968953
2008043	21	0.153482020191043	2.32597241005065
2008043	22	0.143374873696459	1.97233942065315
2008043	23	0.135906989156177	1.66076221706437
2008044	0	0.125998799827127	1.4786740395809
2008044	1	0.123195747146631	1.40032960812721
2008044	2	0.123694057347228	1.41714313846437
2008044	3	0.125596203962172	1.49238128112351
2008044	4	0.136442342522577	1.66932645209311
2008044	5	0.145798353158552	1.89796418261126
2008044	6	0.150574440783743	2.02415296178699
2008044	7	0.12724440723375	1.90361082038946
2008044	8	0.0912668107706274	1.50785556748077
2008044	9	0.0698324602451467	1.18975081461362
2008044	10	0.0646972036280877	1.10558512117237
2008044	11	0.0696146628779628	1.1539400747429
2008044	12	0.0823818519159427	1.2996088457714
2008044	13	0.0945134662556677	1.42850721745667
2008044	14	0.0991678404247344	1.45291432100396
2008044	15	0.107604711796567	1.47900045458182
2008044	16	0.133752470933184	1.58348673769574
2008044	17	0.188600161500736	1.93118205672238
2008044	18	0.252665939536244	2.30554096816318
2008044	19	0.274910051648472	2.41932514545568
2008044	20	0.266281794210781	2.39491525695635
2008044	21	0.25762396617161	2.40902421963564
2008044	22	0.255416771416794	2.42913258477172
2008044	23	0.259429868729795	2.62615176478625
2008045	0	0.290945050531162	2.93512629192964
2008045	1	0.283856668098058	3.11126878848433
2008045	2	0.24972422475645	2.99032539410887
2008045	3	0.219413687827	2.95198092427824
2008045	4	0.200307782764563	3.00190112511337
2008045	5	0.170117142289211	3.06820347140002
2008045	6	0.143628645589794	2.95970521751143
2008045	7	0.15367245476851	2.67914173168665
2008045	8	0.148778045297035	1.81706061631676
2008045	9	0.12568682068006	1.05624672125539
2008045	10	0.113908797936123	0.792578552884781
2008045	11	0.104687802838001	0.717975421326064
2008045	12	0.104994507452021	0.711120066854018
2008045	13	0.107532378104869	0.683902129814735
2008045	14	0.107347942555447	0.641591133621832
2008045	15	0.108063532636751	0.629546797732087
2008045	16	0.115124650455817	0.652769300440309
2008045	17	0.123030523565277	0.682737110148284
2008045	18	0.128948595459646	0.711677279920121
2008045	19	0.13260797510964	0.734649949592852
2008045	20	0.137239110729263	0.764194915562563
2008045	21	0.142143997921189	0.766621530787134
2008045	22	0.146299843471649	0.744346083432332
2008045	23	0.142872744857708	0.690520742544101
2008046	0	0.148015839677677	0.703152664284921
2008046	1	0.159220596680683	0.742480964598032
2008046	2	0.174670610709862	0.787215375939751
2008046	3	0.187312903832562	0.811532694718334
2008046	4	0.20327623901416	0.8393077000128
2008046	5	0.224166721604514	0.918708002369301
2008046	6	0.250107132495612	1.09937569602896
2008046	7	0.267300462291105	1.24891323132559
2008046	8	0.27487330994823	1.28944760025288
2008046	9	0.274418895900045	1.2457122519338
2008046	10	0.269230478772991	1.17674191964033
2008046	11	0.259990613702965	1.0965728618848
2008046	12	0.250433089405757	1.03150583360902
2008046	13	0.239434049019265	0.991915834819536
2008046	14	0.225064600266216	0.959023779012413
2008046	15	0.208898314012657	0.988992791034545
2008046	16	0.19868972361107	0.968604927449795
2008046	17	0.18977592271755	0.916204427374896
2008046	18	0.180311586851529	0.837848558696885
2008046	19	0.171998392321465	0.797039517801002
2008046	20	0.166144513010232	0.789149159315815
2008046	21	0.164294925281945	0.818011982205838
2008046	22	0.171220029527342	0.912924768406623
2008046	23	0.181709814487894	1.0470846880321
2008047	0	0.190283489422123	1.18888742173007
2008047	1	0.198337979224008	1.3157766261321
2008047	2	0.203250600369946	1.41501752795781
2008047	3	0.207236162860893	1.49775793545416
2008047	4	0.21045912072272	1.56753264752974
2008047	5	0.212695630655737	1.62326687176318
2008047	6	0.21583935115358	1.68757392018625
2008047	7	0.219721843274926	1.75504338735237
2008047	8	0.223072595083294	1.81287959532927
2008047	9	0.224359545855054	1.85852111382822
2008047	10	0.229419505992377	1.90854826595203
2008047	11	0.22477744145489	1.88102396817084
2008047	12	0.213388936559033	1.78746146880178
2008047	13	0.210324120319069	1.66518233661746
2008047	14	0.200467927937629	1.43805434715815
2008047	15	0.181505996776959	1.13724401562866
2008047	16	0.167413279690297	0.940209314688307
2008047	17	0.158592454399835	0.848109085630103
2008047	18	0.152058319239784	0.806571436126746
2008047	19	0.147731839040245	0.786826314682693
2008047	20	0.145441053886705	0.791597363529951
2008047	21	0.135122626892362	0.787744207075927
2008047	22	0.120728358906527	0.796580840562269
2008047	23	0.119389812534793	0.923882382627946
2008048	0	0.131413413426472	1.14998370164659
2008048	1	0.146315702169401	1.41216355691818
2008048	2	0.156300531323681	1.6523229472438
2008048	3	0.162264818813941	1.85757314010289
2008048	4	0.16467481046319	2.05506147681801
2008048	5	0.171931822475122	2.30220141863384
2008048	6	0.176268160652166	2.51500546308653
2008048	7	0.172289695576374	2.63849709021488
2008048	8	0.173891129945605	2.79474699421474
2008048	9	0.179164261362612	2.98486869464699
2008048	10	0.186541337377078	3.16156048103613
2008048	11	0.18476788546303	3.26129898600315
2008048	12	0.187379419588731	3.33088153575958
2008048	13	0.179009623754099	3.26360848574375
2008048	14	0.197685089990172	3.36705668452919
2008048	15	0.216590235523693	3.28758618912963
2008048	16	0.22494797887545	3.24620583717764
2008048	17	0.220383358184572	3.20487953206335
2008048	18	0.209268649305996	3.22030436111567
2008048	19	0.189990638653687	3.26782469440145
2008048	20	0.17657563383972	3.29138480396577
2008048	21	0.180708195310923	3.34662032605558
2008048	22	0.188113693870062	3.47127779001251
2008048	23	0.198584128335907	3.6706509727588
2008049	0	0.207330730450716	3.97639402334775
2008049	1	0.221779746460564	4.31235585925071
2008049	2	0.221576853888257	4.49883663721052
2008049	3	0.212368083202723	4.33705752197763
2008049	4	0.214903720807406	4.33772405824332
2008049	5	0.233481373337425	4.62962932674338
2008049	6	0.249446144612646	5.03572152488937
2008049	7	0.266966386692147	5.37968079104783
2008049	8	0.279292675880947	5.56505962736784
2008049	9	0.29169142955029	5.76124007694937
2008049	10	0.322477516316262	6.06233247912601
2008049	11	0.353698631468181	6.33263508010185
2008049	12	0.393936543332528	6.55593095877512
2008049	13	0.424407781331709	6.66074783326993
2008049	14	0.432043334776837	6.5941891610423
2008049	15	0.436780192148675	6.43249711619908
2008049	16	0.462081274277703	6.33679911474684
2008049	17	0.483246750344863	6.32047982740275
2008049	18	0.533317238383397	6.2734039323777
2008049	19	0.560190817996085	6.34114762000889
2008049	20	0.576533696765257	6.23719224455777
2008049	21	0.610108677079785	6.0881305568817
2008049	22	0.607974455885645	6.1220185898405
2008049	23	0.507032666267144	5.92295205026547
2008050	0	0.380223685086893	5.2704899687528
2008050	1	0.330530602056368	4.75670826004543
2008050	2	0.301119968155504	4.37380134716577
2008050	3	0.27554369045848	3.97853056368117
2008050	4	0.245633623513632	3.46663230988839
2008050	5	0.208140220713703	2.88413246198682
2008050	6	0.160879193325266	2.26339196850102
2008050	7	0.124777523767026	1.80163573944008
2008050	8	0.111708433066261	1.50951619916672
2008050	9	0.109132474056133	1.39211901441814
2008050	10	0.128903680770094	1.33856168340336
2008050	11	0.139091285270844	1.28090254376879
2008050	12	0.145713178200967	1.18236596997322
2008050	13	0.144724833299799	1.04731546775954
2008050	14	0.140425163391872	0.886391783579153
2008050	15	0.100534349481622	0.658797627680475
2008050	16	0.0577482179119752	0.48892640872037
2008050	17	0.0452050678543524	0.431112194875786
2008050	18	0.044350838717511	0.413431750664906
2008050	19	0.0432313019571662	0.39399355784652
2008050	20	0.0402474763575234	0.375994089550188
2008050	21	0.0439580299133308	0.40657446983151
2008050	22	0.0590211741135726	0.528372398872585
2008050	23	0.0740850195566222	0.696621686863129
2008051	0	0.0814816957902928	0.848651193744103
2008051	1	0.0938400765145467	1.12711905901891
2008051	2	0.118300734992173	1.57072192347252
2008051	3	0.127980942895362	1.76348254527297
2008051	4	0.129150147936931	1.71518949027295
2008051	5	0.127015592902385	1.57934935328467
2008051	6	0.115574924325532	1.3891056155235
2008051	7	0.105365965003638	1.28209571346181
2008051	8	0.101551944685254	1.24837674547923
2008051	9	0.100819578179222	1.24952229672368
2008051	10	0.101588091418824	1.24112836481296
2008051	11	0.104529287372318	1.22962838191988
2008051	12	0.108052841951976	1.24703160032282
2008051	13	0.115502908124589	1.32275656116928
2008051	14	0.121176493732237	1.43695153969152
2008051	15	0.120996765032055	1.46712891487576
2008051	16	0.111808501532705	1.36946885881671
2008051	17	0.111244216211521	1.37711733446975
2008051	18	0.109227070991431	1.37550436297351
2008051	19	0.111878696503105	1.41230963142868
2008051	20	0.114234620887765	1.48075367850027
2008051	21	0.120369762765682	1.61285398003957
2008051	22	0.127517249427107	1.83393250837669
2008051	23	0.124942570772579	1.96426290585192
2008052	0	0.11635266925329	1.89150111264581
2008052	1	0.109201103490929	1.74906142286308
2008052	2	0.10952561876416	1.82234242430398
2008052	3	0.130449620727312	2.09808885848472
2008052	4	0.163229772326968	2.3914782372629
2008052	5	0.172103120259884	2.43993233212683
2008052	6	0.195202404967474	2.9620669498981
2008052	7	0.185356793123527	3.47400970253654
2008052	8	0.120765643950029	2.73969791075048
2008052	9	0.140014383110753	2.66767031832318
2008052	10	0.151917400423576	2.9625539321009
2008052	11	0.160222665550212	3.42809147235739
2008052	12	0.179124063047965	4.05826158277336
2008052	13	0.210905747949244	5.0869785896867
2008052	14	0.24708656233184	6.48869266239273
2008052	15	0.264582126768767	7.7099364474453
2008052	16	0.239219235620477	7.46032449908309
2008052	17	0.344299893992235	9.68544792050332
2008052	18	0.533701053911022	11.9464322314825
2008052	19	0.739611673559729	14.2469958625583
2008052	20	0.837348205040169	15.1357188540832
2008052	21	0.903894143233493	15.7970741679008
2008052	22	0.957232188204132	16.894661546801
2008052	23	0.954452451222657	16.3958173898611
2008053	0	0.924692239602042	15.2212338553134
2008053	1	0.953550434538132	15.4964139270934
2008053	2	0.972368438137347	15.5383481211945
2008053	3	0.90460633284906	14.7177340592116
2008053	4	0.930100352237683	14.5877020892831
2008053	5	0.80335405791328	11.5877627566697
2008053	6	0.709314470178987	10.3529682766126
2008053	7	0.505945033573078	8.74357186529875
2008053	8	0.692078745837968	9.49267870077894
2008053	9	0.99473817965203	11.44674118044
2008053	10	0.625955528149689	9.3554874287846
2008053	11	0.381316561419062	6.20690538269956
2008053	12	0.366209760133657	5.6861331668927
2008053	13	0.891880036693505	13.9036327398684
2008053	14	0.82650131501026	10.2247612805134
2008053	15	0.183615596841699	3.20553168394429
2008053	16	1.23381924397233	15.6065676385275
2008053	17	0.799121766712734	11.6634814795116
2008053	18	0.473007552268534	9.35424651121241
2008053	19	0.535600360650603	10.5107202116164
2008053	20	0.509393731116579	10.5108732508958
2008053	21	0.583650752628557	11.7917109578483
2008053	22	0.581291960251415	11.4115128111589
2008053	23	0.507956884935934	10.0021274183378
2008054	0	0.469351303618072	9.23845450457651
2008054	1	0.467990381355463	9.43594059196279
2008054	2	0.492567643647479	9.98556943797888
2008054	3	0.493842039612435	10.1865239913091
2008054	4	0.502954978749555	10.0709572484647
2008054	5	0.527377078310652	9.94959583417964
2008054	6	0.536862034225088	9.45623796226529
2008054	7	0.532533948413429	8.72718293125895
2008054	8	0.516507046759602	8.01514558133365
2008054	9	0.499336452158438	7.51509336076635
2008054	10	0.470871814940211	7.02607107151797
2008054	11	0.408240368865539	6.02719031262885
2008054	12	0.319820973535143	4.6844228138569
2008054	13	0.232679699004286	3.4593878760113
2008054	14	0.247360579737595	3.57325864599479
2008054	15	0.293844517997496	4.13420807495752
2008054	16	0.230383849668744	3.94988412569656
2008054	17	0.176821082032076	3.85475830243856
2008054	18	0.145616591469273	3.57024080213288
2008054	19	0.215752736339004	5.68796190184884
2008054	20	0.341296954053992	7.9373662208498
2008054	21	0.568506370870485	9.63683662959798
2008054	22	0.721668261903967	9.58065920900628
2008054	23	0.730008445679117	7.52029799786216
2008055	0	0.735440447100031	6.84929609051848
2008055	1	0.764220350494781	7.54506135894805
2008055	2	0.896684897188108	10.7079465443955
2008055	3	0.813576030372842	10.8425096093412
2008055	4	0.672201385113215	9.57522346269948
2008055	5	0.625901055431987	8.87112114410373
2008055	6	0.65025424266513	8.30963656298655
2008055	7	0.545115739805452	6.81479257697795
2008055	8	0.497634028879564	7.1815912756584
2008055	9	0.446727796863161	6.89861665877687
2008055	10	0.41413270425506	6.67130879299702
2008055	11	0.432776240467024	6.50027818450994
2008055	12	0.449656416343568	6.02376027953671
2008055	13	0.414283066094778	5.40743780717403
2008055	14	0.380930257094667	5.51619384633771
2008055	15	0.403265939833909	5.87455124351725
2008055	16	0.426161409087027	5.93965586857262
2008055	17	0.428631850684158	6.13027440861207
2008055	18	0.409895930936248	6.16843806287715
2008055	19	0.346843111153219	5.94433116605696
2008055	20	0.293457635689917	5.61277432155409
2008055	21	0.254683397508223	3.32824303297229
2008055	22	0.062883705568219	0.999523177755444
2008055	23	0.148829707729859	1.80504636432018
2008056	0	0.16675527945049	1.71744524328429
2008056	1	0.192605267080369	2.22564664737852
2008056	2	0.242244459892982	3.39389234568742
2008056	3	0.196798363981739	3.22373497653484
2008056	4	0.183124915080026	3.20193410331164
2008056	5	0.168924678413494	2.98919308140934
2008056	6	0.164696589485857	2.75601763945766
2008056	7	0.1658269264566	2.58712915896679
2008056	8	0.189653981754491	2.69963338478343
2008056	9	0.214611178571719	2.84420001660567
2008056	10	0.215363008826672	2.66280485492545
2008056	11	0.188823370521393	2.19358355187492
2008056	12	0.182396887636083	2.03041160820582
2008056	13	0.178000375442141	1.89168559106053
2008056	14	0.171366585166839	1.75462722983926
2008056	15	0.169485601391382	1.6904795924765
2008056	16	0.170182342767716	1.67296431483872
2008056	17	0.169731404434962	1.63129862806648
2008056	18	0.163340744748625	1.46111604089516
2008056	19	0.155679876881379	1.34286048671508
2008056	20	0.140989321098686	1.23154890653176
2008056	21	0.130153519692278	1.23933337670004
2008056	22	0.125293940310376	1.45458129324678
2008056	23	0.10523980163135	1.69026856161081
2008057	0	0.0882038845308921	1.85005944769007
2008057	1	0.090407495166313	2.40699207356461
2008057	2	0.0994638940768219	3.38168944733178
2008057	3	0.129665688916378	4.34480028969422
2008057	4	0.31305628993697	7.44901703602248
2008057	5	0.397019155456583	8.23253264807578
2008057	6	0.423585254872441	8.53546269136861
2008057	7	0.395075106655101	8.10850668236251
2008057	8	0.364669785398427	8.02489186261736
2008057	9	0.416840431879207	8.60648657881866
2008057	10	0.587725905470903	8.57839578649807
2008057	11	0.64627154668367	6.82347784795784
2008057	12	0.259099172419508	4.41965811763697
2008057	13	0.19949781967155	4.32881752548718
2008057	14	0.23028250262083	4.55546988500254
2008057	15	0.349175718364061	6.3016943159556
2008057	16	0.434270311327138	7.79578701256914
2008057	17	0.541011139753889	10.3685434173663
2008057	18	0.576786190563542	11.1800392075401
2008057	19	0.515386359326385	9.96597931430932
2008057	20	0.454166232225556	9.69163345618744
2008057	21	0.43734568805136	9.3160724431272
2008057	22	0.5793560710437	12.5760766668359
2008057	23	0.671541450301007	14.6404110889106
2008058	0	0.620444250496089	12.8677694544131
2008058	1	0.703871998423523	14.080776303579
2008058	2	0.705053688247947	14.2964286822438
2008058	3	0.613639487795104	13.2445760529808
2008058	4	0.514724659204464	11.5723178905148
2008058	5	0.438409418433574	9.83839282618525
2008058	6	0.477751796134096	10.3019649155894
2008058	7	0.536230588083493	10.9527135118681
2008058	8	0.584454989936559	11.2921010346212
2008058	9	0.609978752722426	11.5357982014541
2008058	10	0.621412792773049	11.0894358049665
2008058	11	0.549672213923845	9.68348087274931
2008058	12	0.451601197886684	7.76998773867586
2008058	13	0.333221386172912	5.62629247417366
2008058	14	0.14064408088774	3.08040072702018
2008058	15	0.0975381427861959	2.5205531505011
2008058	16	0.100999631140635	2.5383102563389
2008058	17	0.133752519715781	3.15822774185582
2008058	18	0.391748631932953	8.64594443075861
2008058	19	0.578412851615997	11.3224327984722
2008058	20	0.621717392884804	11.2598334499928
2008058	21	0.617468770344893	10.8757264678344
2008058	22	0.561720779555968	10.043543559308
2008058	23	0.518641846844964	9.08695281160103
2008059	0	0.509181372217829	8.56006965588489
2008059	1	0.507531209755955	8.30740752213486
2008059	2	0.483949037008532	7.98919669987932
2008059	3	0.477330509941106	7.7808206117926
2008059	4	0.472035609865619	7.55240634959319
2008059	5	0.405028020895434	6.25693579178624
2008059	6	0.339000973016734	4.83889493645884
2008059	7	0.315210733602468	4.19647122256127
2008059	8	0.302456917506315	3.75837730752031
2008059	9	0.296619742476185	3.45488442648779
2008059	10	0.308879592219123	3.31890623415355
2008059	11	0.311513466067646	3.30323187516847
2008059	12	0.305006194300981	3.25606708492936
2008059	13	0.293725096940346	3.13601369946115
2008059	14	0.285209511435149	2.95461846768593
2008059	15	0.283459798863127	2.8310851252422
2008059	16	0.274295660021328	2.78851626556117
2008059	17	0.237661581634458	2.81759231140409
2008059	18	0.207970777205075	2.75951920331514
2008059	19	0.19177335892558	2.67003237148929
2008059	20	0.176156240176706	2.67402947535941
2008059	21	0.1785625614623	3.05630329621474
2008059	22	0.194472562089337	3.54678204715924
2008059	23	0.192132940899611	3.73695594734455
2008060	0	0.176065754881803	3.60643024702979
2008060	1	0.178019088516117	3.74513116360544
2008060	2	0.181152819840737	3.81503404758575
2008060	3	0.166508098530904	3.53621781520471
2008060	4	0.176694005552858	3.69728797943796
2008060	5	0.157647483779686	3.23268787500808
2008060	6	0.153742301118091	2.95332793587786
2008060	7	0.138028757222419	2.51171120160665
2008060	8	0.115864984554708	1.95383288616616
2008060	9	0.128138541599584	2.13155903658398
2008060	10	0.139514714672033	2.36722475278554
2008060	11	0.173830251594258	2.98972048001247
2008060	12	0.165879916321316	3.0935004064707
2008060	13	0.165903334229482	3.29728418884266
2008060	14	0.158463617610422	3.19141717583852
2008060	15	0.150452720918398	2.94489974189089
2008060	16	0.178036689794903	3.2810987402484
2008060	17	0.196261732964236	3.57607946373614
2008060	18	0.205368853810069	3.84383989134088
2008060	19	0.213016234872594	4.49052536318873
2008060	20	0.138840955957691	3.59752193828395
2008060	21	0.115872470730353	3.8086644237466
2008060	22	0.0903777474184134	3.75471297997809
2008060	23	0.115646324706729	4.18367908009136
