# Supplementary material for: A comparison of sea salt emission parameterizations in northwestern Europe using a chemistry transport model setup
Source: Copernicus journal article supplement (doi:10.5194/acp-16-9905-2016), 2016-08-08
Supplement: Supplementary file 2 [file acp-16-9905-2016-supplement.zip › conc/conc.timeseries.values.win2008.base.Na.DE0002R.csv]

doy	hour	pm2.5	pm10
2008001	0	0.16984699526095	0.670793383889195
2008001	1	0.171332650422639	0.794483273583106
2008001	2	0.158627906170694	0.779612288313861
2008001	3	0.155272799456709	0.753895260149645
2008001	4	0.149697980302028	0.731441908650153
2008001	5	0.150630241440409	0.727294483620081
2008001	6	0.162401646523984	0.79610074447073
2008001	7	0.186028348200395	0.870925440869994
2008001	8	0.215658787725729	0.90385464248674
2008001	9	0.24804560982164	0.904850857084217
2008001	10	0.295326144394917	0.9189485594787
2008001	11	0.323540279864164	1.11923523325447
2008001	12	0.344220980604678	1.29812942811332
2008001	13	0.336427674560057	1.22606941305605
2008001	14	0.320262695065037	1.18077316342261
2008001	15	0.290806893960375	1.14499021947734
2008001	16	0.269797571538615	1.11552259169508
2008001	17	0.250439870646419	1.04329306782244
2008001	18	0.236573739136429	0.992754383679802
2008001	19	0.227642572251104	0.936100640895841
2008001	20	0.227411900546048	0.848110677734353
2008001	21	0.218343984915574	0.730445734529173
2008001	22	0.206856078716204	0.623525957970602
2008001	23	0.196741535691859	0.550854057160267
2008002	0	0.194492332498812	0.500705914688604
2008002	1	0.185241382043023	0.458235953199354
2008002	2	0.187965748478782	0.429227675910142
2008002	3	0.190051759241341	0.406573938593902
2008002	4	0.186263575801567	0.381960585839746
2008002	5	0.17321867816672	0.354027610081231
2008002	6	0.157159578386511	0.34283097318323
2008002	7	0.163522607641982	0.41223774246616
2008002	8	0.163601433266799	0.406551172868947
2008002	9	0.155147578143884	0.344082455191991
2008002	10	0.146409629891838	0.269861012792094
2008002	11	0.129878652249651	0.232223075630428
2008002	12	0.106763923470887	0.210296593825905
2008002	13	0.102834887527089	0.235168655840279
2008002	14	0.108015689441722	0.240530244711905
2008002	15	0.124199093139329	0.233043935100084
2008002	16	0.134930162008833	0.231088736186671
2008002	17	0.12587764143319	0.208326663134614
2008002	18	0.0513669162622296	0.126390120822174
2008002	19	0.0343610865722178	0.0860587611011877
2008002	20	0.0177828992281177	0.0325110994549691
2008002	21	0.0112180236035505	0.0169283616636834
2008002	22	0.00953892728048064	0.0139613152701931
2008002	23	0.00731428520837254	0.010640617408331
2008003	0	0.00484692104938822	0.00739820909529303
2008003	1	0.00404253772474525	0.00616207976645522
2008003	2	0.00404807652007257	0.0065350601999937
2008003	3	0.00433790002423488	0.00749442091832886
2008003	4	0.00440480295773244	0.00740195591990239
2008003	5	0.00369448078195957	0.00580242675059028
2008003	6	0.00305433273879548	0.00488490960429985
2008003	7	0.00313169443300238	0.00554948811321825
2008003	8	0.00342983648887198	0.00751907020045903
2008003	9	0.00729325396304082	0.0210548999999254
2008003	10	0.010876161466592	0.0298303183782261
2008003	11	0.0108003231049806	0.0274561737492449
2008003	12	0.0146782854531817	0.0352013986458354
2008003	13	0.0185093111326887	0.0397982182277639
2008003	14	0.0154760464860888	0.0289101646602007
2008003	15	0.0127060808425069	0.0220561357098503
2008003	16	0.0121477418446139	0.0202472050578125
2008003	17	0.0146427467726348	0.0230381737995353
2008003	18	0.0197715411637485	0.0288778332145964
2008003	19	0.0235400772303642	0.0344003080753474
2008003	20	0.0300215401300637	0.0550307715540116
2008003	21	0.0333510837756743	0.0671566670865977
2008003	22	0.033438822274686	0.0686927577633175
2008003	23	0.0343094658786414	0.0691280747696184
2008004	0	0.0328162833173071	0.0646508008058851
2008004	1	0.0296927363489763	0.0588838400342831
2008004	2	0.0263531302311975	0.0500280182149572
2008004	3	0.0279066675710117	0.0486876572338443
2008004	4	0.0301639227730552	0.0518669507607095
2008004	5	0.0321378049093684	0.0558626243794041
2008004	6	0.0333751771131236	0.0576481390279943
2008004	7	0.0345355275779924	0.0596057942823781
2008004	8	0.03472395668517	0.0598436290919969
2008004	9	0.0352450960280607	0.0631863538796635
2008004	10	0.0373566566921983	0.0667279086758716
2008004	11	0.0386196651143536	0.0652541597204603
2008004	12	0.0385950852422641	0.0603420919567046
2008004	13	0.0378917685169424	0.0551724911276316
2008004	14	0.036742648014401	0.0506582259466922
2008004	15	0.0355398963405569	0.046682222335488
2008004	16	0.0335018913675204	0.0418001133747485
2008004	17	0.0309374246748064	0.038105177247263
2008004	18	0.0279882713447934	0.0357211010477196
2008004	19	0.0260697991166046	0.0353112827612207
2008004	20	0.0263460233230508	0.0367606016692973
2008004	21	0.0256793419746206	0.0335447934789738
2008004	22	0.0253331697377136	0.0328949259413059
2008004	23	0.0288148501221092	0.0419297527538528
2008005	0	0.0364323832404843	0.0604590533129311
2008005	1	0.0440200150489296	0.0840107736306489
2008005	2	0.0561631156437524	0.114283242999169
2008005	3	0.0625786322195588	0.125278488323943
2008005	4	0.0663339082322075	0.15234716131739
2008005	5	0.0775606084364201	0.228622786308119
2008005	6	0.0851115006094731	0.309894267283362
2008005	7	0.0888096138536531	0.335052540287704
2008005	8	0.0922401722424921	0.321681560950032
2008005	9	0.0926111574064688	0.279449292710132
2008005	10	0.0759745369276416	0.247759708740566
2008005	11	0.0482052301726575	0.176026297015829
2008005	12	0.0505582608146835	0.170014543422598
2008005	13	0.0435165472257105	0.0982173873830546
2008005	14	0.0457625878234179	0.0894965049254006
2008005	15	0.0375301019779224	0.0621471565516941
2008005	16	0.021994708446276	0.0391297604901636
2008005	17	0.0147900354625341	0.0323670374517334
2008005	18	0.0139135566684163	0.0482441361063574
2008005	19	0.0163862233553093	0.0858312432285036
2008005	20	0.0209419704571921	0.125736168190582
2008005	21	0.0240076864541654	0.137752229551332
2008005	22	0.024243116862423	0.140527911783492
2008005	23	0.0268625462632652	0.143822252607942
2008006	0	0.0302040108939465	0.151875673844256
2008006	1	0.0344309795203091	0.16802169841978
2008006	2	0.038393033340094	0.170990505700725
2008006	3	0.0405175097722448	0.158016714130165
2008006	4	0.0409113082903055	0.143448490731783
2008006	5	0.0404707488431013	0.133664353968498
2008006	6	0.0396872713548362	0.123916742201506
2008006	7	0.0378581278118572	0.109276329491964
2008006	8	0.0359759299446192	0.0965826265522784
2008006	9	0.0347165730399754	0.08772610134843
2008006	10	0.0318741010568903	0.0808327355377511
2008006	11	0.026730763736082	0.0882028196851555
2008006	12	0.0328004160123967	0.220873879260765
2008006	13	0.0534580566440595	0.44717673959963
2008006	14	0.0609500264466495	0.408430670498997
2008006	15	0.0612077769481199	0.367820189291098
2008006	16	0.0613235524372556	0.3626444277124
2008006	17	0.0612093183988412	0.357700060472382
2008006	18	0.0617590484170694	0.352200673321475
2008006	19	0.0635306979436139	0.349505466165443
2008006	20	0.0651577220970293	0.349195925160168
2008006	21	0.0676600274120431	0.357318118241725
2008006	22	0.0690060212485828	0.370302260321271
2008006	23	0.061566331379968	0.330785261439585
2008007	0	0.0657476413376789	0.373340548542699
2008007	1	0.0716783476769077	0.41074802579207
2008007	2	0.0775311377227044	0.425185506225521
2008007	3	0.0777287908705487	0.358248705842134
2008007	4	0.0731010698150747	0.294239381202776
2008007	5	0.0667919628218991	0.238872330400942
2008007	6	0.0637267606556748	0.234069350153138
2008007	7	0.061321332608774	0.292348503392422
2008007	8	0.0579253880367071	0.348899996166961
2008007	9	0.0458155355137141	0.284267859659131
2008007	10	0.0329776798786556	0.163892884928014
2008007	11	0.010260044284965	0.0432975529031866
2008007	12	0.0145492074517293	0.198207301079962
2008007	13	0.0185187784364498	0.181448234086264
2008007	14	0.047273066083045	0.409213335575867
2008007	15	0.0463588158321951	0.253334066463262
2008007	16	0.0638932801565511	0.599529195476094
2008007	17	0.0228617640797762	0.289165734617266
2008007	18	0.0118291695965806	0.248351903543215
2008007	19	0.0109163332248851	0.159436535167659
2008007	20	0.0170598982470639	0.185133439969502
2008007	21	0.0456688969657685	0.497958933318634
2008007	22	0.110383720830331	1.09418945140901
2008007	23	0.107557517769955	0.879874667655598
2008008	0	0.0565897146610776	0.399479438964096
2008008	1	0.0245754872011188	0.144077630065363
2008008	2	0.0449339613153504	0.489473635069913
2008008	3	0.0635947697218785	0.837381295683629
2008008	4	0.0771720087313894	1.31955898537078
2008008	5	0.108975685679086	1.49548318157539
2008008	6	0.154902249081662	1.70618536663828
2008008	7	0.181031953762193	1.67966091447388
2008008	8	0.181015030655617	1.00899170400533
2008008	9	0.133995515310488	0.384163432125337
2008008	10	0.123640832315371	0.295209299336273
2008008	11	0.126740466432669	0.497384122855451
2008008	12	0.136208335055008	0.862509747582036
2008008	13	0.140353090906013	0.937643026950432
2008008	14	0.115498423889298	0.591761773156166
2008008	15	0.083708089844728	0.315526284256418
2008008	16	0.0828818142465573	0.256575291446207
2008008	17	0.0705032122439688	0.142256831663727
2008008	18	0.0665836451061248	0.129361725518515
2008008	19	0.0669319240894253	0.125794565709906
2008008	20	0.0684990232869114	0.133040133557288
2008008	21	0.0752150523061413	0.180979209241178
2008008	22	0.0722461717565193	0.220701266774072
2008008	23	0.0663188195732916	0.282420420059559
2008009	0	0.0678246543898814	0.449630432864896
2008009	1	0.0739246837859986	0.562780117849161
2008009	2	0.0796580870081104	0.512343064965055
2008009	3	0.0857258231801356	0.404745222026414
2008009	4	0.085057545386107	0.35730667932871
2008009	5	0.0812976903982094	0.358427785265662
2008009	6	0.0738771745068098	0.27519472834448
2008009	7	0.0722104913989659	0.219452774688864
2008009	8	0.0723432964674418	0.172125839529518
2008009	9	0.0689956073916831	0.134322400338304
2008009	10	0.0605345414966205	0.126661858542786
2008009	11	0.0553677866573683	0.147138498002038
2008009	12	0.0436517153334825	0.117776586447923
2008009	13	0.0241230155743988	0.0591914452029957
2008009	14	0.0139072847647421	0.038649528549835
2008009	15	0.0128579096341444	0.0483616615296027
2008009	16	0.0163679996560499	0.0721084835275526
2008009	17	0.0195753380705571	0.0729237889320261
2008009	18	0.0326370873209479	0.162238619234308
2008009	19	0.0389420719175962	0.195473258000166
2008009	20	0.0414854014225587	0.19712073822464
2008009	21	0.0457756346410495	0.191737673692052
2008009	22	0.0461928398928761	0.181679678437082
2008009	23	0.044797049542201	0.195509707509104
2008010	0	0.0462150070730176	0.244557082724357
2008010	1	0.0445363295994924	0.225942663186835
2008010	2	0.0411681848860198	0.168458853013622
2008010	3	0.0428777473317604	0.145378489845798
2008010	4	0.0470554549792891	0.154346153579889
2008010	5	0.0492825271036924	0.183258472167448
2008010	6	0.0462452658333967	0.188679387230087
2008010	7	0.0419486446197862	0.223814749892913
2008010	8	0.04848489267468	0.420389456747589
2008010	9	0.0451412744432172	0.515102652576979
2008010	10	0.0415144244934633	0.385387080099562
2008010	11	0.0245345158722253	0.102735122382521
2008010	12	0.0201899114970533	0.0814276248299694
2008010	13	0.0205631860672347	0.101964576153108
2008010	14	0.0169969448436149	0.0714446904984585
2008010	15	0.0155719646317318	0.0659720136778008
2008010	16	0.0152658584164652	0.0653658546663582
2008010	17	0.0127713796183415	0.0447063471724201
2008010	18	0.00780766540511547	0.0203788405131303
2008010	19	0.00733502071761921	0.0211320793432464
2008010	20	0.00849838630941941	0.0225382188711715
2008010	21	0.00994694276303611	0.0237040960041422
2008010	22	0.0117996049456292	0.0278099262028947
2008010	23	0.0143896147170036	0.0330267634778816
2008011	0	0.0167134081658251	0.0384216398904506
2008011	1	0.0155623598203047	0.0345996719627489
2008011	2	0.0103060141207411	0.0247786774778587
2008011	3	0.00912704377044235	0.021569985600253
2008011	4	0.00769100019022969	0.0154566213510084
2008011	5	0.00540116756225356	0.00969921351968711
2008011	6	0.00290940372350064	0.00503177205701921
2008011	7	0.00213060853171664	0.00422935819781791
2008011	8	0.00199558001035034	0.00553078143408259
2008011	9	0.00267623241410726	0.00991194962790509
2008011	10	0.00557292858043237	0.0252974698587091
2008011	11	0.00561442642529669	0.0218899776520571
2008011	12	0.0047549471426148	0.0167423404818588
2008011	13	0.00451608319754131	0.0153670675291893
2008011	14	0.00411409028116751	0.012319925235256
2008011	15	0.00444533620970596	0.0102813125658099
2008011	16	0.00434552549901522	0.00782046080368005
2008011	17	0.00371496324301889	0.00589202850676298
2008011	18	0.00316995898956065	0.00566600561887398
2008011	19	0.00313791918035137	0.00620864063536459
2008011	20	0.00310998843573677	0.00679060598079771
2008011	21	0.00346918038083262	0.00745116813528051
2008011	22	0.00606563591753374	0.0159822784223976
2008011	23	0.011516377227672	0.034466508067406
2008012	0	0.0120761286147404	0.0340760567418139
2008012	1	0.0107149923926471	0.0284771801217166
2008012	2	0.00828089605723629	0.021681701537449
2008012	3	0.00505832910427122	0.0148747360187012
2008012	4	0.00456571918423946	0.0168513822044559
2008012	5	0.0288941134534196	0.0870148372831267
2008012	6	0.0608486522640171	0.185970603914721
2008012	7	0.0499259586977035	0.177419602591233
2008012	8	0.0265987660719566	0.145248516891448
2008012	9	0.0313045567653201	0.210547220297349
2008012	10	0.0665753023224357	0.39911218902548
2008012	11	0.0896967221288804	0.473411893385439
2008012	12	0.0853499372185773	0.428559804533641
2008012	13	0.0674770346903888	0.309057680561598
2008012	14	0.0593589930946439	0.25428658968697
2008012	15	0.0473791472731135	0.213820417024209
2008012	16	0.038269886625992	0.243697850889845
2008012	17	0.037597712343284	0.310865661474097
2008012	18	0.0367889941019102	0.310088819993005
2008012	19	0.0372314261177081	0.274009920948941
2008012	20	0.0405209796432119	0.264019923198107
2008012	21	0.0434851659094255	0.247717975079087
2008012	22	0.0453377256445158	0.193056105987354
2008012	23	0.0459190018430061	0.150600524481613
2008013	0	0.0445508991490696	0.139006675823237
2008013	1	0.0473388304560151	0.14985860888846
2008013	2	0.0506557472636654	0.16222994667166
2008013	3	0.0554974492397641	0.155311042515283
2008013	4	0.0600839043620267	0.138228036053131
2008013	5	0.071346516005361	0.139650740585059
2008013	6	0.0880149964552202	0.168963827441123
2008013	7	0.0966599191220212	0.183800433886194
2008013	8	0.0953225643976323	0.201952286161874
2008013	9	0.100769554726019	0.328246077004431
2008013	10	0.108789761918859	0.558246297107211
2008013	11	0.112904429752311	0.641103288669914
2008013	12	0.104850795326503	0.506139778852907
2008013	13	0.102615948652733	0.384601480148871
2008013	14	0.107506406201873	0.285938900136055
2008013	15	0.093186942448439	0.223271735183726
2008013	16	0.0902122475304454	0.227148013912984
2008013	17	0.0826133448580213	0.232004202681238
2008013	18	0.0707688972538118	0.239738532316879
2008013	19	0.0635575364579963	0.248095365132895
2008013	20	0.0594331721739614	0.243650961388523
2008013	21	0.056092505471634	0.21379186225176
2008013	22	0.0549591218327852	0.178918888573252
2008013	23	0.049860894795479	0.145203773075551
2008014	0	0.0478797311738377	0.124834829860584
2008014	1	0.0441032396617445	0.109984731583524
2008014	2	0.04197933829673	0.0998018602661678
2008014	3	0.0409273498617686	0.0929318656935628
2008014	4	0.0395246085056153	0.0858674558195273
2008014	5	0.0365335702427328	0.0807930593800943
2008014	6	0.0398321443692616	0.0974834752680775
2008014	7	0.0389949934710589	0.0806382242109859
2008014	8	0.0377594607193399	0.0704250984090383
2008014	9	0.0358049510899475	0.0605932519666769
2008014	10	0.0398700496836913	0.0652712901694019
2008014	11	0.0398648716791768	0.0598700955736324
2008014	12	0.0360046394623712	0.0566193559331746
2008014	13	0.0340826752053267	0.0506526030383283
2008014	14	0.0381545679208899	0.0531260368635979
2008014	15	0.0382480495813387	0.0557459291402865
2008014	16	0.035371801817218	0.0506029347129292
2008014	17	0.0335068764100182	0.0471742583825789
2008014	18	0.0329580252668726	0.0480127944649326
2008014	19	0.0357503951704448	0.0560464324373155
2008014	20	0.0427720196984281	0.0711217316090219
2008014	21	0.0482458810319354	0.0790272262854549
2008014	22	0.0479780552649488	0.07308899063106
2008014	23	0.0458401401986184	0.0686747935899651
2008015	0	0.0423352451963848	0.0605466382054752
2008015	1	0.0381170674145199	0.0532608615778436
2008015	2	0.032755776697468	0.0474799071430869
2008015	3	0.028655643280074	0.0529859671462124
2008015	4	0.0256082194389819	0.0615261523522365
2008015	5	0.0208115287512479	0.058300552866024
2008015	6	0.0173147940472637	0.0545191299249168
2008015	7	0.0180338601681993	0.0771984085043979
2008015	8	0.0275335370048248	0.14545376729952
2008015	9	0.0433426226834819	0.294013268114221
2008015	10	0.0507424403617318	0.313229291211593
2008015	11	0.0545875848022695	0.301628503144768
2008015	12	0.0492342501295097	0.262474770826144
2008015	13	0.0375214752253574	0.20509143067248
2008015	14	0.0426804855394016	0.226748074186412
2008015	15	0.0306460686801274	0.121292296415565
2008015	16	0.0254686948686772	0.103081155462462
2008015	17	0.0256369719093981	0.106845361631782
2008015	18	0.0274828162001938	0.105539958574466
2008015	19	0.0270372003280968	0.0754701966167019
2008015	20	0.0270353558926713	0.0639576354182446
2008015	21	0.0270265794792958	0.0590149043703071
2008015	22	0.0251001045478756	0.0541945002002857
2008015	23	0.0197892761492249	0.0434777469897048
2008016	0	0.0120354038047249	0.0253436632584532
2008016	1	0.00523217454647949	0.0116833073086285
2008016	2	0.00420739501042728	0.0120868867538715
2008016	3	0.00407816632915719	0.0112732510865804
2008016	4	0.00331916674891144	0.00998747138289242
2008016	5	0.00285071081678007	0.0105519444799864
2008016	6	0.00408284332086154	0.0264478675030875
2008016	7	0.00649768569855976	0.0514163452344289
2008016	8	0.00747093537223186	0.0628082820439365
2008016	9	0.0110026880167684	0.110459562020578
2008016	10	0.0297807066408422	0.264667237873126
2008016	11	0.0396612447314272	0.293966175245163
2008016	12	0.0387973692824919	0.263464090251309
2008016	13	0.0337783318558775	0.194113047018006
2008016	14	0.0367609036063082	0.155765501632085
2008016	15	0.0403519401253163	0.13791800292375
2008016	16	0.0395522275865524	0.120085454821532
2008016	17	0.0376373961161707	0.105777195759161
2008016	18	0.035800077552248	0.0866628754670771
2008016	19	0.0368627184140933	0.0714381789209651
2008016	20	0.0443310973866411	0.0839110724858987
2008016	21	0.0496125136578181	0.105673628350113
2008016	22	0.0531927402174448	0.125908759526526
2008016	23	0.0599344312935998	0.16174975129008
2008017	0	0.065690423553622	0.153183389409173
2008017	1	0.060377152031038	0.115050407381137
2008017	2	0.0552647455504126	0.0974823259132225
2008017	3	0.0462387256556909	0.0783693429554506
2008017	4	0.0312910495268287	0.052402405020819
2008017	5	0.0182415928277885	0.0369402294893516
2008017	6	0.0214067321448635	0.0504007054359794
2008017	7	0.0275044773321094	0.0631121940069801
2008017	8	0.0298183653650565	0.0688948208130234
2008017	9	0.0320406320441961	0.0927304084477276
2008017	10	0.035881226171581	0.1199324671056
2008017	11	0.0317695792860114	0.0962173075732989
2008017	12	0.0308469758564294	0.0920089729779465
2008017	13	0.0302720909030295	0.0881284098562006
2008017	14	0.0504282207539583	0.16583240952738
2008017	15	0.0491295504507329	0.139437495982765
2008017	16	0.0346207476138771	0.0865474460748533
2008017	17	0.0363136148581248	0.107059136985279
2008017	18	0.0385298780073411	0.132095227284719
2008017	19	0.0326824093024651	0.120138864792293
2008017	20	0.0286014187639493	0.105311615113567
2008017	21	0.0192957929164012	0.0666969815036804
2008017	22	0.0272501709264674	0.076916517862951
2008017	23	0.035878646287047	0.0783098832454263
2008018	0	0.0263309017273996	0.123601817134327
2008018	1	0.0398415326387989	0.436857804591405
2008018	2	0.0197593520795064	0.253634964702706
2008018	3	0.00192298669575154	0.0272027857903859
2008018	4	0.019037617678578	0.369926196230872
2008018	5	0.0856701769716543	1.0138409330612
2008018	6	0.0468928709216189	0.385589438345816
2008018	7	0.0208323394836726	0.159187205288741
2008018	8	0.0474139972914391	0.787410184520633
2008018	9	0.0627664804141988	1.07189107154795
2008018	10	0.0558352804050834	0.868914660737233
2008018	11	0.0564507298971152	0.700985981744609
2008018	12	0.0723574250323827	0.71242321268196
2008018	13	0.0759610834628312	0.695777796976413
2008018	14	0.0889100296033954	0.790950235464748
2008018	15	0.103242902735737	0.826331629573315
2008018	16	0.0941226798740563	0.550135609790413
2008018	17	0.10609265138069	0.503209980887625
2008018	18	0.110487892476623	0.564117827107409
2008018	19	0.0927668641675201	0.441746152801643
2008018	20	0.0881309941819019	0.291567845957681
2008018	21	0.14364991908122	0.378783434602291
2008018	22	0.0620173694651507	0.139493501763854
2008018	23	0.0685071902163379	0.270785049790872
2008019	0	0.124451432816512	0.62305542536673
2008019	1	0.147431515059779	0.998340227927279
2008019	2	0.165999911715438	1.48703290873723
2008019	3	0.0874162775154786	0.763920160596475
2008019	4	0.121477736490444	0.967539910521932
2008019	5	0.131690286476696	0.782257630661436
2008019	6	0.0706229683076224	0.40776311585343
2008019	7	0.0157913977292543	0.125332107069999
2008019	8	0.00701963790618131	0.0593628109497119
2008019	9	0.00404599375834308	0.0491783456987408
2008019	10	0.0122417182953481	0.182763231731459
2008019	11	0.0568126178626511	0.600428258105648
2008019	12	0.111203325346898	1.0873518201371
2008019	13	0.141586419838628	1.31558835001322
2008019	14	0.167660980064006	1.39216235225672
2008019	15	0.229487091293493	1.81413153643421
2008019	16	0.235416552803644	2.02118807684297
2008019	17	0.219009470391493	1.91981846912883
2008019	18	0.189339666012354	1.73559627465258
2008019	19	0.175520960177777	1.6257839376247
2008019	20	0.174274068764157	1.54875458373486
2008019	21	0.177992149618578	1.32371773339781
2008019	22	0.184717099552823	0.978596172137285
2008019	23	0.17268149983467	0.660319747025492
2008020	0	0.159813783539443	0.554945338678818
2008020	1	0.152837942610695	0.553553034931607
2008020	2	0.146211493756958	0.597997731902138
2008020	3	0.150756330369909	0.702632447551958
2008020	4	0.146259962568614	0.734071382845775
2008020	5	0.123858811173407	0.729144985305131
2008020	6	0.128229502363675	1.16147148228928
2008020	7	0.0691466935114789	0.605664432636187
2008020	8	0.0246297545533151	0.190915336710863
2008020	9	0.00731818211268174	0.0524505657647148
2008020	10	0.00136469431241218	0.00673145136502303
2008020	11	0.000197427597651972	0.000771316964321071
2008020	12	0.0001236177972209	0.000389009972535443
2008020	13	0.00012875224207822	0.000319669308087635
2008020	14	0.000133494415892766	0.000328593236508737
2008020	15	0.000706872211472031	0.0043155179014928
2008020	16	0.0124544812656223	0.066116669699231
2008020	17	0.0328858085495621	0.170140498267567
2008020	18	0.0363391484381378	0.203225865427165
2008020	19	0.032776718997292	0.232399079152592
2008020	20	0.0232108909025701	0.230110110863194
2008020	21	0.0165370972957445	0.195415596479465
2008020	22	0.0138271642624857	0.181002399993296
2008020	23	0.0137927569430243	0.156063189134429
2008021	0	0.0122511374743541	0.103603946889183
2008021	1	0.000512800884082404	0.00348911681122441
2008021	2	2.14835101710632e-05	0.000103614602009513
2008021	3	2.14528626987908e-05	8.42578627823476e-05
2008021	4	2.92244412617077e-05	0.000102963145115418
2008021	5	2.20628779390135e-05	7.70365526132983e-05
2008021	6	5.91115087693128e-05	0.000567112936152483
2008021	7	0.000421988777953635	0.00859712744752966
2008021	8	0.00252993590658441	0.0585089939444484
2008021	9	0.00401843027576931	0.100922408682665
2008021	10	0.00109021453202867	0.0238487228106452
2008021	11	0.000356942340768377	0.00437978195437471
2008021	12	0.000122754853434032	0.000979171702928753
2008021	13	3.29386569012721e-05	0.000211346210240038
2008021	14	7.52190252454714e-06	4.7952171675872e-05
2008021	15	0.000120670163053091	0.000840733335633655
2008021	16	0.000578697835467782	0.0048716511487916
2008021	17	0.00647347675303506	0.0318771668612156
2008021	18	0.0153419290990875	0.0789152496419674
2008021	19	0.0125276129633617	0.0709179495704795
2008021	20	0.0134121760481005	0.0984738754687472
2008021	21	0.00639864316511313	0.0488710520847968
2008021	22	0.00210004676456772	0.0211557133746624
2008021	23	0.0011883183993792	0.0162728590098828
2008022	0	0.0012625850509191	0.0203182103542991
2008022	1	0.00263649428390666	0.0246807272121496
2008022	2	0.0186324530254934	0.144678713658336
2008022	3	0.0724765163248865	0.871278024794812
2008022	4	0.170734844737156	1.72154281809866
2008022	5	0.299113713501158	1.7317224521599
2008022	6	0.355331953770182	1.6575527916311
2008022	7	0.363617019445975	1.51308739373925
2008022	8	0.36558162380255	1.46268948226944
2008022	9	0.409664232701029	1.95442961284055
2008022	10	0.441948975712416	2.03547962260784
2008022	11	0.431629273465106	1.78984188582193
2008022	12	0.380458696474689	1.54564399000523
2008022	13	0.345706708402262	1.41373044449905
2008022	14	0.314425102655378	1.38823487211919
2008022	15	0.275621352360427	1.27504550621633
2008022	16	0.248469496165437	1.19373745764136
2008022	17	0.207653343831398	1.02374986598661
2008022	18	0.153511103273012	0.822968782582203
2008022	19	0.119096036342917	0.666855467766474
2008022	20	0.0978555657904326	0.58567139971583
2008022	21	0.0906283877774023	0.568835575323394
2008022	22	0.0871052542325733	0.556144568372505
2008022	23	0.0845278444501982	0.542684812831326
2008023	0	0.0823357302103659	0.541805998119608
2008023	1	0.0906540714473655	0.611329531219665
2008023	2	0.108194560458273	0.769814668987106
2008023	3	0.150575905846346	1.11839719168302
2008023	4	0.157000244552978	0.991952207876863
2008023	5	0.153335489642791	0.8522395463973
2008023	6	0.169949030207527	0.699917117226334
2008023	7	0.162378784776243	0.466010685894038
2008023	8	0.158034800403626	0.360658000665053
2008023	9	0.217429680369688	0.407824757407779
2008023	10	0.254980094069985	0.460177734780528
2008023	11	0.224445022641552	0.420473947533377
2008023	12	0.170955981927891	0.386673522252054
2008023	13	0.124045342081091	0.294086464663937
2008023	14	0.0923405982397301	0.193436903642519
2008023	15	0.0780667125281068	0.13770492462866
2008023	16	0.0736306187289072	0.127079421748962
2008023	17	0.0621080423971189	0.100742987954631
2008023	18	0.0292506212654839	0.0420655873403909
2008023	19	0.00870009180997968	0.0158603286337229
2008023	20	0.016878760213393	0.108975714521014
2008023	21	0.0581157064543935	0.264928013760786
2008023	22	0.0680277969541646	0.215823509230988
2008023	23	0.0674891520168216	0.177757507151653
2008024	0	0.0650191989997726	0.162099432940778
2008024	1	0.0595618316173052	0.156446613570751
2008024	2	0.054198671020856	0.164639282662208
2008024	3	0.0525363152480525	0.189530192799801
2008024	4	0.0516060593460213	0.226400083601245
2008024	5	0.0476277169980553	0.213684745788901
2008024	6	0.0401491698288423	0.160211098991781
2008024	7	0.0386811139216038	0.146508740940321
2008024	8	0.0484529838708288	0.183899957917727
2008024	9	0.057647306449274	0.233807626323496
2008024	10	0.0645215241723569	0.310626745951863
2008024	11	0.0608847528216167	0.327334718999163
2008024	12	0.0434661310083926	0.205887010927346
2008024	13	0.0342468336624969	0.298562738257306
2008024	14	0.0800822968836421	0.975054163525484
2008024	15	0.157574652546782	1.79064647640232
2008024	16	0.224958385828656	2.19538448531867
2008024	17	0.226685995453611	1.95328058586076
2008024	18	0.18623841514715	1.68877126806409
2008024	19	0.139983904129037	1.73220557753138
2008024	20	0.12144759438709	2.02924968046989
2008024	21	0.125396162823915	2.2765515828579
2008024	22	0.113949915231977	2.0891919721529
2008024	23	0.114636025786013	1.98473428737341
2008025	0	0.123105485674445	1.74125466489699
2008025	1	0.147325288508341	1.47120533441943
2008025	2	0.148779996613634	1.13276102189816
2008025	3	0.164377095807694	0.960964261279217
2008025	4	0.155835707405443	0.715805844151352
2008025	5	0.14427962350993	0.666289825251303
2008025	6	0.113950532970722	0.595437501912485
2008025	7	0.0962587489131416	0.656171821934103
2008025	8	0.093667452767575	0.743979996358228
2008025	9	0.107203177190168	0.816864496671055
2008025	10	0.124949389214942	0.954348310946139
2008025	11	0.148288680740818	1.13266557299332
2008025	12	0.161307220410039	1.14273020412995
2008025	13	0.170526197947689	1.17178858728172
2008025	14	0.170842511775947	1.17879474422017
2008025	15	0.168249857182994	1.21254741739816
2008025	16	0.16509742881526	1.28890377188033
2008025	17	0.156692292865273	1.25826178776281
2008025	18	0.140615287403123	1.13453418457035
2008025	19	0.128367576279955	1.08790008301808
2008025	20	0.129381024173665	1.16434498012538
2008025	21	0.138479240598125	1.35520487560942
2008025	22	0.146323251623567	1.45209864053347
2008025	23	0.149525021261265	1.4809583432021
2008026	0	0.149418966182159	1.44355833513886
2008026	1	0.148771083188803	1.3488996860192
2008026	2	0.154306119607411	1.39729881068064
2008026	3	0.168111755237556	1.54334500158856
2008026	4	0.173603827551258	1.61484199690967
2008026	5	0.17154713010998	1.58241303868856
2008026	6	0.168071907247326	1.51539785344098
2008026	7	0.16664419139778	1.50700318935297
2008026	8	0.163471397256532	1.57907829704912
2008026	9	0.159117118695059	1.73961887989681
2008026	10	0.157418447900327	1.79007860311591
2008026	11	0.172264553574069	1.93607187428741
2008026	12	0.20016419485636	2.27766651481923
2008026	13	0.231521660006726	2.63945672661561
2008026	14	0.251422095639725	3.02019535601338
2008026	15	0.225583574709543	2.99233148867027
2008026	16	0.155689350887645	2.45464708815794
2008026	17	0.13610255712752	2.34293119429207
2008026	18	0.175054495260504	2.97045247068413
2008026	19	0.213178955431763	3.39444403917796
2008026	20	0.205660926173084	3.29701640151759
2008026	21	0.241028538838164	4.0887175145404
2008026	22	0.250268277716248	3.97467376419589
2008026	23	0.240820788911189	3.59902848231772
2008027	0	0.235683521342662	3.30097052959886
2008027	1	0.213732820967021	2.89986795729297
2008027	2	0.189677322899775	2.42756037742898
2008027	3	0.16956388404879	1.82000365166696
2008027	4	0.0816008692923106	0.700740665708978
2008027	5	0.0320574740664113	0.238280568142898
2008027	6	0.01058937207623	0.0665275648129072
2008027	7	0.00687664633229733	0.0367906882750073
2008027	8	0.00685209179620123	0.0314651569818792
2008027	9	0.00647026880641304	0.0255535201860199
2008027	10	0.00525078608349163	0.0178162262234891
2008027	11	0.00372777751778848	0.0140999453184624
2008027	12	0.011123674584618	0.0513677397941977
2008027	13	0.0630840188138248	0.290505583167247
2008027	14	0.131099291760161	0.445551175512296
2008027	15	0.148278502559812	0.409099443033618
2008027	16	0.214198118832059	0.608085765285523
2008027	17	0.309433961375241	0.842502874053306
2008027	18	0.397623654674308	0.972376480320839
2008027	19	0.452284206066962	0.957318440923518
2008027	20	0.46982620250948	0.856209320063858
2008027	21	0.495597369601955	0.873740344379854
2008027	22	0.526686092702768	0.934919355378722
2008027	23	0.554944662287707	0.988051024906467
2008028	0	0.573436690365948	1.02831173734088
2008028	1	0.590437509434634	1.13005854472829
2008028	2	0.580415914413821	1.18509107746456
2008028	3	0.567748994244164	1.20641945638101
2008028	4	0.521647380780611	1.09845641038463
2008028	5	0.423428265099482	0.886213873434171
2008028	6	0.406224464437495	0.928644049599536
2008028	7	0.428340078063878	1.08600940059556
2008028	8	0.421348927873005	1.11211222841651
2008028	9	0.36104347796568	1.29931378512747
2008028	10	0.307765938492432	1.36547940377812
2008028	11	0.316913083996535	1.65631298046841
2008028	12	0.321573911006561	1.67284286171088
2008028	13	0.299070300801347	1.31225179582619
2008028	14	0.279043052436495	1.01441779654702
2008028	15	0.243828584832529	0.757445463780808
2008028	16	0.165138134692857	0.409269368882383
2008028	17	0.134401789016709	0.297339642259746
2008028	18	0.127587155554198	0.260111290288003
2008028	19	0.117384085084918	0.209337430856951
2008028	20	0.0965029240445951	0.151543257615409
2008028	21	0.0921700473101741	0.1355399326986
2008028	22	0.0937766375370688	0.135554419057633
2008028	23	0.0925184371365373	0.155391408514754
2008029	0	0.0983558810544428	0.334955977603077
2008029	1	0.099114878683555	0.464706025937699
2008029	2	0.0962273746732145	0.544415905980931
2008029	3	0.0907200489812119	0.599187807380544
2008029	4	0.0888814650826705	0.674113735788486
2008029	5	0.0925271020176448	0.773036524864205
2008029	6	0.0863199882399852	0.716795612739648
2008029	7	0.0830562598000737	0.692180162526713
2008029	8	0.0952460191328414	0.693497361337401
2008029	9	0.10504153898199	0.711282181074965
2008029	10	0.122668825433544	0.741690018736032
2008029	11	0.136358210894153	0.724774990928142
2008029	12	0.138782746082755	0.680050703763027
2008029	13	0.12926746352585	0.641084358383171
2008029	14	0.117798785225596	0.639563858651347
2008029	15	0.103495632008972	0.611329482162774
2008029	16	0.0959199454007838	0.590607838466135
2008029	17	0.0940967391894821	0.567529193490611
2008029	18	0.0930595878607378	0.551783561189382
2008029	19	0.0981066988063769	0.543096494924085
2008029	20	0.0987814298373851	0.536491532480811
2008029	21	0.0955772312878421	0.54143019944261
2008029	22	0.122349462267261	0.669456670870651
2008029	23	0.133529198441235	0.716173582691097
2008030	0	0.150782752471477	0.773552484806129
2008030	1	0.158910536931547	0.795383443227489
2008030	2	0.16479319041637	0.790900062057157
2008030	3	0.157065573415808	0.738502610874136
2008030	4	0.145605078819227	0.648931907715794
2008030	5	0.129666774680804	0.527639069598792
2008030	6	0.101589246965123	0.369033271798837
2008030	7	0.0787695442764049	0.250342320964415
2008030	8	0.0609948898070752	0.178231429589386
2008030	9	0.0532815707572854	0.166640484420313
2008030	10	0.0487117457952329	0.183531846595078
2008030	11	0.0423262706465931	0.214774423287564
2008030	12	0.0335739330529715	0.19382475841336
2008030	13	0.0305795692640494	0.137143467498188
2008030	14	0.0516644052948394	0.133351815287671
2008030	15	0.0596723203573157	0.115137339157755
2008030	16	0.0692225565553257	0.156441736751454
2008030	17	0.0736748511224235	0.158877973758504
2008030	18	0.118498535524795	0.366971379144434
2008030	19	0.153374014069043	0.610984779566589
2008030	20	0.144554388866692	0.541004991780819
2008030	21	0.118020579818931	0.484309113656353
2008030	22	0.0961465520820112	0.528761828372156
2008030	23	0.100888861762559	0.657677087626145
2008031	0	0.128645024901964	0.664322473462113
2008031	1	0.119389523125349	0.382907135128328
2008031	2	0.125944410437528	0.330686793178267
2008031	3	0.134023508326722	0.338940813212586
2008031	4	0.138758149767315	0.390264377462826
2008031	5	0.139531820973536	0.426186280270226
2008031	6	0.137685616477543	0.518499147461377
2008031	7	0.144438706079428	0.814050573515889
2008031	8	0.180341341821916	0.97599515040054
2008031	9	0.160392462432663	0.660558049143955
2008031	10	0.10649705794732	0.369619329360535
2008031	11	0.0797206680084435	0.248353880581783
2008031	12	0.0595789943245466	0.177097228568282
2008031	13	0.0434851769145078	0.128326496198187
2008031	14	0.0343657431770494	0.0954729235769154
2008031	15	0.0301137156971371	0.0801429601174533
2008031	16	0.0282085090733229	0.0754157196496969
2008031	17	0.0257171437344953	0.076159179633781
2008031	18	0.0263105143998761	0.118178468158608
2008031	19	0.0354442427157279	0.215501769958581
2008031	20	0.0405605411662032	0.218403334245746
2008031	21	0.0402491016347884	0.176464600842463
2008031	22	0.0358468047837098	0.159521142034924
2008031	23	0.0309344924673089	0.192083260449342
2008032	0	0.0311516181101062	0.33585562874206
2008032	1	0.0353070971443253	0.395248716231833
2008032	2	0.0534409865696313	0.450368930530718
2008032	3	0.0904218277912722	0.633289995616671
2008032	4	0.131201155696677	0.856629181736272
2008032	5	0.158099516298364	0.940628954978258
2008032	6	0.188806778795761	1.10097018984816
2008032	7	0.189609813266118	1.00839899019486
2008032	8	0.195374468393865	0.947199583871229
2008032	9	0.200055600450842	1.07229312868462
2008032	10	0.205290031940406	1.29245690935143
2008032	11	0.195551749699824	1.31603173190809
2008032	12	0.179246990703175	1.28456767746511
2008032	13	0.175952002090532	1.2913292223385
2008032	14	0.180992007078085	1.34658014453842
2008032	15	0.17549452873284	1.20767051011032
2008032	16	0.169103342599361	0.988706629722618
2008032	17	0.165028559536774	0.788269294535158
2008032	18	0.176798247731759	0.834850996125364
2008032	19	0.203136585377355	0.928015937716855
2008032	20	0.235429956509148	0.991959959348741
2008032	21	0.241889065822162	1.04543317304722
2008032	22	0.226431058346235	1.40937715989307
2008032	23	0.233555113297685	1.73642516380116
2008033	0	0.288818180754126	1.69228170917408
2008033	1	0.196220860644781	1.42814405901087
2008033	2	0.202901350589067	4.56691797977584
2008033	3	0.277036627882306	3.58581110709044
2008033	4	0.256941840607703	2.24485635182285
2008033	5	0.207764078457292	2.17575150941556
2008033	6	0.190275048864294	2.5668604961133
2008033	7	0.381663545797763	5.09977018180225
2008033	8	0.559583118542322	6.98248173543313
2008033	9	0.547748887540499	6.46506376952038
2008033	10	0.468104774286166	5.34746245257986
2008033	11	0.35894949745826	4.05966543319868
2008033	12	0.339080696836269	3.67616405514766
2008033	13	0.355777994692033	3.71193554889846
2008033	14	0.352374433031356	3.44939409495524
2008033	15	0.347844505101078	3.10940869652774
2008033	16	0.288983457114229	2.14528242152234
2008033	17	0.226841288957166	1.57054667048479
2008033	18	0.195746607689934	1.30420587554095
2008033	19	0.247587897844576	1.43366818079499
2008033	20	0.307804078762019	1.24685466867606
2008033	21	0.259925904794866	0.693480357310309
2008033	22	0.235612162242913	0.503965144448142
2008033	23	0.264031589575465	0.503874020990374
2008034	0	0.289213077061536	0.531472117664473
2008034	1	0.292305965654307	0.507788274274755
2008034	2	0.289342988517696	0.504568824985344
2008034	3	0.28894133687577	0.513654831538087
2008034	4	0.29012378696916	0.486577655393295
2008034	5	0.28501694056631	0.468072758274479
2008034	6	0.282335159389767	0.523090995341655
2008034	7	0.282350199852558	0.579575187460498
2008034	8	0.26328697177916	0.597075702376556
2008034	9	0.263233926822817	0.726105750578666
2008034	10	0.276814582239594	0.877852812398387
2008034	11	0.235157507574888	0.654936361156681
2008034	12	0.21063260110251	0.530408093334692
2008034	13	0.173604265933398	0.325573108826597
2008034	14	0.159861292343213	0.28793168745404
2008034	15	0.164778315737458	0.340527417737169
2008034	16	0.15951074130211	0.27333321367063
2008034	17	0.132747134455566	0.176643727749547
2008034	18	0.130848805561673	0.19279341721617
2008034	19	0.129042286059634	0.180636226865181
2008034	20	0.125030722159466	0.169678248523499
2008034	21	0.120252393709074	0.15881605962762
2008034	22	0.115294777160322	0.150898810868191
2008034	23	0.114893454435541	0.146893209273703
2008035	0	0.116382414543024	0.146838327164502
2008035	1	0.118772659965152	0.147113723949923
2008035	2	0.121184809578387	0.149185358474385
2008035	3	0.124161263796231	0.151922643095667
2008035	4	0.128098308157387	0.156610767099105
2008035	5	0.132168322178033	0.166714719461548
2008035	6	0.13828835873196	0.186435980900738
2008035	7	0.138559160855677	0.196159122687786
2008035	8	0.144792003740696	0.214563827585498
2008035	9	0.146127964743395	0.212830365303381
2008035	10	0.140879787515669	0.202223379068377
2008035	11	0.134963038339973	0.18590051581019
2008035	12	0.128119329471379	0.17497457228627
2008035	13	0.119722989736268	0.166588394901991
2008035	14	0.110554265519906	0.157611335191214
2008035	15	0.1012878611785	0.139884150902003
2008035	16	0.075658039402106	0.106662846030045
2008035	17	0.0305834291020255	0.0518158755586419
2008035	18	0.0233684277810842	0.0538803517473119
2008035	19	0.0214774911503278	0.0647358384506726
2008035	20	0.0240447172101367	0.087470730355801
2008035	21	0.0243237935207978	0.075362356078181
2008035	22	0.0243250615743482	0.0721635656634635
2008035	23	0.0239628352562383	0.074003023262557
2008036	0	0.0245263175223162	0.0851282481670498
2008036	1	0.0285827412384667	0.11531791066635
2008036	2	0.0340320881267094	0.111712970799529
2008036	3	0.0385391052304829	0.144381799137413
2008036	4	0.042968293081228	0.203265311406271
2008036	5	0.0466021758064511	0.188755249586225
2008036	6	0.0434636020907538	0.135290523188319
2008036	7	0.0411778639915576	0.122388741820595
2008036	8	0.0439364001776572	0.151972554546543
2008036	9	0.0461458858090378	0.181941770827347
2008036	10	0.0425595039617928	0.17641147878537
2008036	11	0.0365513464125925	0.170811449136854
2008036	12	0.0390213600859901	0.263952620323306
2008036	13	0.0497885605912893	0.395143839123014
2008036	14	0.0624595436205063	0.463912507556708
2008036	15	0.0500537291051133	0.276747505325709
2008036	16	0.0514296996063386	0.176293804617281
2008036	17	0.0403636115762622	0.0998237328027253
2008036	18	0.0212711803091277	0.0504631003647763
2008036	19	0.00922704460632516	0.0268083045430703
2008036	20	0.00958398639391937	0.0329397925277061
2008036	21	0.0283454804006422	0.104335645440653
2008036	22	0.0533877879798958	0.152449558229332
2008036	23	0.0555066888889945	0.13710083890682
2008037	0	0.00491010227665522	0.00968238680351925
2008037	1	0.00428550269017183	0.0239040407014399
2008037	2	0.0214592022796001	0.189277799561007
2008037	3	0.0818089513730323	1.09191975315399
2008037	4	0.0973450800514181	1.222322839532
2008037	5	0.0814132036504023	0.823267784492879
2008037	6	0.0252934561951544	0.19136598439543
2008037	7	0.0112875781599605	0.136436216325824
2008037	8	0.0448409884159789	0.445740828918113
2008037	9	0.0314577239635323	0.391306911175615
2008037	10	0.00591665419627659	0.0582640150598823
2008037	11	0.096473316860148	1.51351658399026
2008037	12	0.373072294911956	4.88732442297366
2008037	13	0.355863765394111	4.77905632007094
2008037	14	0.350188690968642	4.86575226240295
2008037	15	0.403872170580358	5.49900535156391
2008037	16	0.406933857284711	5.38978712580496
2008037	17	0.383181231024393	5.40511934421567
2008037	18	0.357183952238491	5.20158422242296
2008037	19	0.344248110228514	5.16213649985174
2008037	20	0.30862040945645	4.30261275668275
2008037	21	0.292024433726182	4.08240484830719
2008037	22	0.316411977177819	4.81265063960666
2008037	23	0.280093960783773	4.63046783484931
2008038	0	0.250868327994498	4.45996242277775
2008038	1	0.223482486860242	3.8610347310451
2008038	2	0.196007335457746	3.47732699699572
2008038	3	0.172156597480371	3.47054466301168
2008038	4	0.164285376761762	3.35988384106497
2008038	5	0.153997121583569	3.32083581246068
2008038	6	0.149731885005411	3.48403005602375
2008038	7	0.158481874506812	3.566186761502
2008038	8	0.172661094134729	3.03988475071338
2008038	9	0.187844510075009	2.71235009471707
2008038	10	0.222763366123447	2.48405123184844
2008038	11	0.246502154650122	2.05358358550926
2008038	12	0.22397930779757	1.29062592576703
2008038	13	0.21030119092936	0.954148944467039
2008038	14	0.198595635240124	0.758052896863503
2008038	15	0.191720277281608	0.650703413900554
2008038	16	0.185729434505653	0.568852687828367
2008038	17	0.177214571858201	0.470358762850939
2008038	18	0.184328321761753	0.458805233323443
2008038	19	0.195623041853466	0.614536303354387
2008038	20	0.227803230651014	0.851281615921851
2008038	21	0.244050477392238	0.90338776572811
2008038	22	0.269134935596417	1.05990710200341
2008038	23	0.285274278717379	1.16165327995281
2008039	0	0.297066316769385	1.14413014746826
2008039	1	0.296240672352108	1.10992972326967
2008039	2	0.283787757413216	1.07228902594352
2008039	3	0.273423916739537	1.07878761166527
2008039	4	0.262516880407568	1.1270975653048
2008039	5	0.259537287651089	1.16716621604307
2008039	6	0.267209380008352	1.16947962481826
2008039	7	0.264400174791594	1.13389617277751
2008039	8	0.253403011087507	1.06894161647765
2008039	9	0.245070427998147	1.00161272828038
2008039	10	0.23186160249186	0.930403119274834
2008039	11	0.197048934358385	0.869636670770062
2008039	12	0.16680937256217	0.797198713193213
2008039	13	0.152872783621615	0.705325682952946
2008039	14	0.140580454451358	0.638852918088352
2008039	15	0.135895503272784	0.607093966799055
2008039	16	0.135207340568627	0.57562395230111
2008039	17	0.135198795070038	0.538537682562783
2008039	18	0.138111691915221	0.518962962750459
2008039	19	0.141530225650897	0.50769342673971
2008039	20	0.141245919315109	0.488762096806712
2008039	21	0.139189103575079	0.473885278728113
2008039	22	0.137739430778589	0.467843164791006
2008039	23	0.134465674384993	0.474356800523936
2008040	0	0.136201494114914	0.491240629060225
2008040	1	0.134529146904987	0.485708757506744
2008040	2	0.131690827076492	0.480197411117251
2008040	3	0.117600087205775	0.474358531612407
2008040	4	0.114928518162127	0.511905045946747
2008040	5	0.114879679371679	0.529828962266274
2008040	6	0.123450848895446	0.597227483768586
2008040	7	0.13552671329567	0.633674550967424
2008040	8	0.143935823475227	0.651733673224436
2008040	9	0.146848643609804	0.664519608472557
2008040	10	0.132487508859488	0.681179778911887
2008040	11	0.123492904540723	0.773243696319411
2008040	12	0.112418529483163	0.759259377920547
2008040	13	0.102303785061945	0.702428592625738
2008040	14	0.0993582628049011	0.695164913316731
2008040	15	0.102993632422544	0.72027289678663
2008040	16	0.105285825811044	0.725454146531504
2008040	17	0.105230132513409	0.712720135650162
2008040	18	0.103058394418041	0.695523414599359
2008040	19	0.0970265955985033	0.67899249290875
2008040	20	0.0964777873407434	0.681421514534867
2008040	21	0.0982099546937468	0.688696513380946
2008040	22	0.100698250912864	0.68332106734929
2008040	23	0.100627581591172	0.67027431662179
2008041	0	0.100757171368107	0.641976012553612
2008041	1	0.098518561522511	0.611769592550413
2008041	2	0.098656026326535	0.578121487787871
2008041	3	0.0996789843258924	0.538807561676889
2008041	4	0.0972164120679008	0.487262291065517
2008041	5	0.0948678389237367	0.449290086403345
2008041	6	0.0935197013931215	0.419381585781331
2008041	7	0.0913270817498767	0.389693688958788
2008041	8	0.0775891612497366	0.360267431715716
2008041	9	0.0811463333371953	0.414202888512448
2008041	10	0.0703168164775435	0.38993233851811
2008041	11	0.0758707891994344	0.457207020165121
2008041	12	0.0748434383188867	0.4579637189323
2008041	13	0.0696980499306091	0.416622983193161
2008041	14	0.0656691078069845	0.392687536160475
2008041	15	0.0620771403308199	0.363585450954383
2008041	16	0.0595550651565412	0.341176755266639
2008041	17	0.0583320450624688	0.318721616646953
2008041	18	0.0571943951231301	0.296643219983213
2008041	19	0.0563825705813975	0.276866289375644
2008041	20	0.0546756742795329	0.259960848406607
2008041	21	0.0531491356743044	0.239533663822316
2008041	22	0.051350586803371	0.21925836330507
2008041	23	0.049023584104546	0.202593679987806
2008042	0	0.047713974248849	0.189060254543611
2008042	1	0.0465929836990961	0.178347356595898
2008042	2	0.0463366683986637	0.169400648627851
2008042	3	0.0460026605966446	0.161410083536078
2008042	4	0.0454096394246772	0.15421135103532
2008042	5	0.0450316529037101	0.148365648915742
2008042	6	0.0443292133035554	0.143295881872173
2008042	7	0.0434250334172821	0.138059211441897
2008042	8	0.0425434170432073	0.13225711529249
2008042	9	0.0359710811341052	0.124250446827781
2008042	10	0.0388713226697641	0.206547441450706
2008042	11	0.0472041665052628	0.333359579860745
2008042	12	0.0521936211184598	0.388224775047208
2008042	13	0.0506909531251072	0.380031643378534
2008042	14	0.0503105485733497	0.383603797510495
2008042	15	0.0517329270478124	0.364452878880779
2008042	16	0.0487055839577471	0.31976031801223
2008042	17	0.0464839053610748	0.289335486340681
2008042	18	0.0444675606817187	0.26685090787668
2008042	19	0.0431992662808552	0.249471153331255
2008042	20	0.0428214855343046	0.235628246898175
2008042	21	0.0418258319429784	0.223192264829985
2008042	22	0.0402940979923228	0.209843929798047
2008042	23	0.0397010374275913	0.197797963909324
2008043	0	0.0397969936319176	0.189036654392854
2008043	1	0.0391190989919318	0.183432965188116
2008043	2	0.0373741036829167	0.183101344132134
2008043	3	0.036706454749217	0.194122826504959
2008043	4	0.0341082080561325	0.225728603160652
2008043	5	0.0346781630711497	0.290433331733313
2008043	6	0.0408809402590075	0.391989154087213
2008043	7	0.0500272117146477	0.510271536237924
2008043	8	0.0632415106864964	0.636499505764119
2008043	9	0.0763778932234909	0.721086719184451
2008043	10	0.0800314025561602	0.794346525914509
2008043	11	0.0956311912247834	1.18456835204744
2008043	12	0.190966945111302	1.82843770786725
2008043	13	0.179293690345418	1.32663657594363
2008043	14	0.162690202193676	1.12516092617932
2008043	15	0.137430190088113	1.01688129429574
2008043	16	0.124185045397231	0.937608843366509
2008043	17	0.10573818867234	0.867706369519894
2008043	18	0.0932823349249949	0.778936990057049
2008043	19	0.0902831304963152	0.707501956599337
2008043	20	0.0862425336013643	0.644640700985933
2008043	21	0.0818732639333759	0.596569121474598
2008043	22	0.0780668627089441	0.558998217577339
2008043	23	0.0754506314841485	0.535335375118468
2008044	0	0.073436372788841	0.514270875315531
2008044	1	0.072553724095524	0.492674087104388
2008044	2	0.0719917966600664	0.465514071261451
2008044	3	0.0707250788152819	0.434985525962648
2008044	4	0.07012976892489	0.411068432982998
2008044	5	0.0770033597211853	0.387955308052809
2008044	6	0.076394145376433	0.361699591134214
2008044	7	0.0721015195252494	0.333621579262163
2008044	8	0.0696873908900441	0.378562127251785
2008044	9	0.0958502612964177	0.592143593619715
2008044	10	0.104404988084505	0.703416771275975
2008044	11	0.0961592647795139	0.612635708519156
2008044	12	0.0933617537722801	0.552337992046212
2008044	13	0.0890274676570738	0.494083692686333
2008044	14	0.0777002907311154	0.442541684268573
2008044	15	0.0614422965314648	0.407513014700417
2008044	16	0.0490323072850573	0.388161206742989
2008044	17	0.0449432813818129	0.390552104147839
2008044	18	0.0422132445615646	0.378539196039928
2008044	19	0.0430501792486221	0.374951089760734
2008044	20	0.0436489327713254	0.374618327760286
2008044	21	0.0436525915270932	0.371775262628537
2008044	22	0.0437076040318389	0.374200934590965
2008044	23	0.0414924634637471	0.395487304822365
2008045	0	0.0444040762332613	0.441040364660103
2008045	1	0.0481676360172415	0.498993625293924
2008045	2	0.047931231136526	0.551048645171681
2008045	3	0.0517073646909739	0.572224280656546
2008045	4	0.0559714711402374	0.584945582166141
2008045	5	0.0612021192797498	0.588087047871677
2008045	6	0.0650362613948822	0.577260854632137
2008045	7	0.0673588920525962	0.591099769672574
2008045	8	0.0637623380921912	0.660140152682583
2008045	9	0.0804542852065265	1.09883498473401
2008045	10	0.0891556609283681	1.10554303672363
2008045	11	0.097605147964608	0.779169052661365
2008045	12	0.0923648672851553	0.541837833348415
2008045	13	0.0939088931906861	0.441825318113904
2008045	14	0.0896604298833763	0.405260539848289
2008045	15	0.0826975267263543	0.36451612270738
2008045	16	0.0833891270034421	0.326735034253714
2008045	17	0.0868468977075604	0.276372254630798
2008045	18	0.0849727357343372	0.195674122914815
2008045	19	0.0668187832495642	0.114853171379004
2008045	20	0.0696105569766087	0.0975845904544602
2008045	21	0.0844351975381851	0.110106863058184
2008045	22	0.0988080503339551	0.124648467994747
2008045	23	0.102972955202394	0.137227752449742
2008046	0	0.104747637807171	0.155992997687016
2008046	1	0.107680280621153	0.157269964392052
2008046	2	0.107779174311444	0.148722407544347
2008046	3	0.103250392956649	0.148097467107421
2008046	4	0.10099388144147	0.17484035167855
2008046	5	0.103414772867906	0.195134075163823
2008046	6	0.117684294115242	0.214696067061575
2008046	7	0.153297799777979	0.263015769876845
2008046	8	0.187675580483539	0.331497609771889
2008046	9	0.199562630832686	0.450909428475861
2008046	10	0.203394352171917	0.527135813978157
2008046	11	0.192472906688808	0.512998579912367
2008046	12	0.17618944780431	0.466537836892789
2008046	13	0.156571601914854	0.413282821448581
2008046	14	0.139919278081684	0.339620159219582
2008046	15	0.127735702524933	0.289343441419622
2008046	16	0.116760195618495	0.249913171588092
2008046	17	0.110015693952497	0.221701476800001
2008046	18	0.105202062826357	0.199047036991926
2008046	19	0.102682571924494	0.192640167847972
2008046	20	0.104633021378868	0.204804783563556
2008046	21	0.110853760081035	0.232006628636873
2008046	22	0.118977395315207	0.254690529918154
2008046	23	0.128978716777379	0.263249560257317
2008047	0	0.13258600048634	0.263982274688262
2008047	1	0.133629493202056	0.275910654697463
2008047	2	0.136239743447197	0.300842003824817
2008047	3	0.140997534178954	0.341195122513411
2008047	4	0.141835827720777	0.37258806436411
2008047	5	0.14625063057812	0.412498332201585
2008047	6	0.152202255010391	0.434249253791034
2008047	7	0.152178154253826	0.426928917891764
2008047	8	0.138196963387032	0.403238800970284
2008047	9	0.13445554675447	0.441352048936417
2008047	10	0.13477639999786	0.476221789838651
2008047	11	0.13151775547532	0.453339076904582
2008047	12	0.136152235259222	0.446010207684276
2008047	13	0.124913339656336	0.400374409779034
2008047	14	0.126719321769581	0.449522117417858
2008047	15	0.127439230440676	0.44418850462592
2008047	16	0.124209798959504	0.411532888102638
2008047	17	0.121595971726929	0.379111480307923
2008047	18	0.114618488370467	0.331028005047082
2008047	19	0.108977157234109	0.302215794758133
2008047	20	0.109889582767275	0.296993405268749
2008047	21	0.10619521701145	0.263278473820912
2008047	22	0.0999694525241519	0.228145011841216
2008047	23	0.0940961550401665	0.196876652418377
2008048	0	0.0840174165075202	0.161339322600549
2008048	1	0.0790734238463401	0.14318101106534
2008048	2	0.0758834774875046	0.129180831773622
2008048	3	0.0734805341711563	0.118920264838519
2008048	4	0.0689936140878997	0.109167343501379
2008048	5	0.0712140458767076	0.123984651142732
2008048	6	0.0717023828064006	0.122623298077734
2008048	7	0.0706842843126495	0.113820074797229
2008048	8	0.068143913145372	0.0999983922984723
2008048	9	0.0651368047886444	0.0876605710675024
2008048	10	0.0654797940991542	0.0854657098367297
2008048	11	0.0685026341038018	0.0885159837623111
2008048	12	0.0662462053518221	0.0831507275565383
2008048	13	0.0631883158676016	0.0785703994984928
2008048	14	0.0580745925625323	0.0745393419542659
2008048	15	0.0567204530776926	0.0818307068625852
2008048	16	0.0534060547621848	0.0767468971207799
2008048	17	0.04983370609487	0.0695753817625573
2008048	18	0.0472017482274143	0.0673988534493603
2008048	19	0.0456670533198665	0.0666065059162004
2008048	20	0.0430519944113651	0.0656776079883544
2008048	21	0.0487557670427687	0.108870163684089
2008048	22	0.0669939866358696	0.195807659349368
2008048	23	0.0649559405418732	0.202864805350963
2008049	0	0.0741139281697271	0.291663245911755
2008049	1	0.0880612940627177	0.415050743261424
2008049	2	0.0943184395953688	0.480908228035881
2008049	3	0.0963430406335769	0.544010053938128
2008049	4	0.0972476515033363	0.60363833521217
2008049	5	0.106711496343693	0.731459722023697
2008049	6	0.106832424202253	0.730497009553795
2008049	7	0.101409862930443	0.703427574939979
2008049	8	0.0965148160094971	0.716685618254958
2008049	9	0.0944664338446721	0.718973251286142
2008049	10	0.0920424918091737	0.695988390989538
2008049	11	0.0913326842632857	0.697034127393923
2008049	12	0.0921912967703385	0.706044470594787
2008049	13	0.0876123016138368	0.665251345468278
2008049	14	0.085425191194757	0.640973692978484
2008049	15	0.0821782176256021	0.619401622758873
2008049	16	0.0853358596797348	0.678719644543171
2008049	17	0.0965163154272796	0.770972890978688
2008049	18	0.0969737931024045	0.635002513914736
2008049	19	0.0891068588969072	0.466879558979164
2008049	20	0.0794228333961303	0.363567548831792
2008049	21	0.0693022482563802	0.319191769170141
2008049	22	0.0646495764499753	0.33432850436971
2008049	23	0.0606404756093963	0.347136656521828
2008050	0	0.0571914425869481	0.350463439838292
2008050	1	0.0554726767728837	0.3511519232001
2008050	2	0.0570617215074973	0.369581306754268
2008050	3	0.0623802044536472	0.412230324759836
2008050	4	0.0697537550352621	0.470820300055983
2008050	5	0.0776835865397597	0.531954786351708
2008050	6	0.0815934100161352	0.580679247535443
2008050	7	0.0810463804158276	0.627281893721895
2008050	8	0.0757429302415751	0.692022893613625
2008050	9	0.159619799127427	1.70206991304916
2008050	10	0.195006830608651	1.88056152172676
2008050	11	0.204840374154479	1.82976636859131
2008050	12	0.198657797050118	1.7305731869914
2008050	13	0.174448047789476	1.59929053401217
2008050	14	0.146687645041229	1.42185148096991
2008050	15	0.105498794328696	1.01019888784622
2008050	16	0.0767307476701117	0.738533413947925
2008050	17	0.0628404398059421	0.580703228027118
2008050	18	0.0577023084786822	0.492561046391779
2008050	19	0.0564584606080368	0.434044121237581
2008050	20	0.0617085003512118	0.388932508084343
2008050	21	0.061454812115562	0.355329915159658
2008050	22	0.0658851010064696	0.332080411609389
2008050	23	0.0658216231351902	0.310772747506343
2008051	0	0.0662870430358363	0.294397401873483
2008051	1	0.0661271064890568	0.287483168008284
2008051	2	0.0681772701527601	0.308397211471805
2008051	3	0.0738368917036863	0.355848104585265
2008051	4	0.0798630847480459	0.413611076291716
2008051	5	0.0897513545370801	0.474992318707662
2008051	6	0.0956221226969229	0.531657418889176
2008051	7	0.0963627544693129	0.584284534874844
2008051	8	0.0831710384007774	0.614883840794955
2008051	9	0.0903961020432913	0.747831928379845
2008051	10	0.0659429564290051	0.466991835389538
2008051	11	0.0442382285646717	0.261451830888626
2008051	12	0.031424463713637	0.15512692865353
2008051	13	0.0234341593733225	0.101086989969562
2008051	14	0.0178396240112688	0.0748218914227418
2008051	15	0.0147429428285742	0.0647652760982063
2008051	16	0.0134478214161677	0.0611743450486063
2008051	17	0.0124995692801682	0.0590772174575782
2008051	18	0.0118614015116123	0.0570582925701103
2008051	19	0.0113285088261054	0.0543970867350141
2008051	20	0.0112878117432117	0.0532547735079367
2008051	21	0.0122285014175735	0.0541170145391387
2008051	22	0.0144621071483948	0.0581406728303013
2008051	23	0.016140694547363	0.0632759772232377
2008052	0	0.0165645330526578	0.0659744640538276
2008052	1	0.0167705982150499	0.0660261517700953
2008052	2	0.016516127487534	0.0647399574597319
2008052	3	0.0166220682875698	0.0611111060200408
2008052	4	0.0171169250732731	0.0560117081850152
2008052	5	0.0223182601685493	0.0777961075013648
2008052	6	0.0284565358194876	0.150544487367985
2008052	7	0.0328197060103974	0.253579380036328
2008052	8	0.0414395088118261	0.380826682888813
2008052	9	0.0508721826568753	0.431742580326269
2008052	10	0.0688339216842182	0.408211411200859
2008052	11	0.0617015149167214	0.30075183942721
2008052	12	0.0514083918334186	0.228117316392057
2008052	13	0.0479356013689637	0.210778322526078
2008052	14	0.0484054435412326	0.251463232005782
2008052	15	0.0474629832063037	0.284628659124238
2008052	16	0.0432780492244824	0.272495103518126
2008052	17	0.0358931986913319	0.218578171752463
2008052	18	0.0281734834140149	0.16935090596852
2008052	19	0.0258168916952426	0.205336333581225
2008052	20	0.0312435440084476	0.251557702519591
2008052	21	0.0366512677666156	0.271173287235249
2008052	22	0.0413672029775	0.296183194951642
2008052	23	0.046602293043721	0.348011671041059
2008053	0	0.0585016445348659	0.425763816391814
2008053	1	0.0741620205798302	0.559159893606603
2008053	2	0.0916099784142737	0.741911794384927
2008053	3	0.109065067595154	0.877339123787411
2008053	4	0.111654753135009	0.814908006851548
2008053	5	0.116483870694126	0.835461462934671
2008053	6	0.122649976962025	0.874158911559307
2008053	7	0.126049678273564	0.889983309091232
2008053	8	0.131378192617732	1.06895657750298
2008053	9	0.127254811016139	1.05842346482054
2008053	10	0.121716581369349	0.953052945242506
2008053	11	0.117999334029268	0.831998185443208
2008053	12	0.119560485939275	0.762530693216098
2008053	13	0.12439670297853	0.729513108184744
2008053	14	0.122740211044272	0.672207473965539
2008053	15	0.118626112142285	0.699558046479554
2008053	16	0.108668822893481	0.701459691414842
2008053	17	0.0861764710256391	0.687760512321554
2008053	18	0.0539525810928211	0.341979288483602
2008053	19	0.0279581759151422	0.158673491963495
2008053	20	0.0147227547378388	0.0940720856234273
2008053	21	0.00293856175825214	0.0232324711912512
2008053	22	0.00566525599450102	0.0586650267757191
2008053	23	0.179707689922752	2.197343470333
2008054	0	0.257768697296777	3.62093602113256
2008054	1	0.325739981607625	4.47459337846072
2008054	2	0.325358598769894	4.50761458630926
2008054	3	0.288071489606315	4.06509571203485
2008054	4	0.246956154883797	3.37633606964413
2008054	5	0.22525339393812	2.97113449850564
2008054	6	0.239513519479636	2.31900056102903
2008054	7	0.201544829392516	1.30661882285333
2008054	8	0.250646648163662	3.22700513420898
2008054	9	0.263767299648893	2.95135317930104
2008054	10	0.283284662558947	2.87706347889866
2008054	11	0.282034460397229	2.77803290546502
2008054	12	0.241845099234479	2.2335922362904
2008054	13	0.201598743973604	1.66552248917902
2008054	14	0.184383448545124	1.20568664365027
2008054	15	0.179146825957995	0.914976150081846
2008054	16	0.180233292966257	0.716930389644583
2008054	17	0.170185688132504	0.549868146402681
2008054	18	0.150688185613048	0.448483924507427
2008054	19	0.0969560537292187	0.24853777598297
2008054	20	0.0586136518346913	0.145578321313529
2008054	21	0.0507046156810425	0.132510956117245
2008054	22	0.0477961781846444	0.15062260511567
2008054	23	0.0534314342266229	0.224015510643467
2008055	0	0.070070106824866	0.231354559577217
2008055	1	0.0726573323935609	0.173563886329627
2008055	2	0.0756445922065586	0.184723247710442
2008055	3	0.0765675588421786	0.195313584205674
2008055	4	0.0728049209879951	0.203117407086296
2008055	5	0.0691569777467493	0.236165451917371
2008055	6	0.0573075847234465	0.208157105737853
2008055	7	0.0448532824400394	0.16064753191271
2008055	8	0.0380252150929937	0.144058733989243
2008055	9	0.0338958373620275	0.132179630491854
2008055	10	0.0342871129452434	0.119216711668175
2008055	11	0.0326025817435725	0.0981070893366289
2008055	12	0.0309930875881533	0.0978658554183852
2008055	13	0.0276837025601018	0.0898863984386486
2008055	14	0.0254179033976746	0.0753353193239413
2008055	15	0.0223900812684864	0.0595419898451481
2008055	16	0.0206270411476317	0.0465157162532044
2008055	17	0.0199894004856566	0.0405981331084022
2008055	18	0.0269626981663068	0.0466880080806703
2008055	19	0.0361771263284542	0.0523167016959248
2008055	20	0.0347246194639221	0.0483681155302186
2008055	21	0.0300778935293946	0.0436675150213749
2008055	22	0.0196648637409616	0.033272756590337
2008055	23	0.0173865939990607	0.0364472651844997
2008056	0	0.0142601395470062	0.0351360785074879
2008056	1	0.0123178304801661	0.0396615814235552
2008056	2	0.0133703013301545	0.0589244871046924
2008056	3	0.0122385178094723	0.0664857653713512
2008056	4	0.0123740941851662	0.0784179561086357
2008056	5	0.00930513776950236	0.0473056759071387
2008056	6	0.0125675441681174	0.0666582500916619
2008056	7	0.0371185383222912	0.180607984701303
2008056	8	0.0799697194172725	0.291612016984585
2008056	9	0.133651593538427	0.507579203921265
2008056	10	0.179760019686426	0.85023349477652
2008056	11	0.19422790872398	1.02370330999795
2008056	12	0.174331491235689	0.84290925508479
2008056	13	0.160943638393917	0.656171248643245
2008056	14	0.148562699202763	0.518941498249631
2008056	15	0.143266219842591	0.421158375560837
2008056	16	0.139233744365026	0.293733676923123
2008056	17	0.11787153204045	0.212647357883934
2008056	18	0.107863558504579	0.187928959185141
2008056	19	0.0979374135356626	0.169953516221163
2008056	20	0.0736930307790638	0.131887622678077
2008056	21	0.0296408864937526	0.0575258644696649
2008056	22	0.0129772738982509	0.0329063371713109
2008056	23	0.0117283658340879	0.0407358100110506
2008057	0	0.0207699637664641	0.0929676298123574
2008057	1	0.02693259810212	0.118200578812126
2008057	2	0.0264815174882332	0.112433173302971
2008057	3	0.0278054530819179	0.0990006120393718
2008057	4	0.0232393583941106	0.0590935391311578
2008057	5	0.0149253505389508	0.0406047475834956
2008057	6	0.013104960648129	0.0436895634020131
2008057	7	0.0143465435283314	0.0525526658477219
2008057	8	0.0142473307772593	0.0517846396928332
2008057	9	0.0123719645503419	0.0465737408488009
2008057	10	0.00930221358556284	0.0333246174514005
2008057	11	0.0046384315349751	0.0168551322198084
2008057	12	0.00229457309079847	0.00872742949187866
2008057	13	0.00164226093189074	0.00872687911059199
2008057	14	0.00132487234572919	0.0123626733174915
2008057	15	0.00092543945387279	0.0106228677715393
2008057	16	0.000372673413511474	0.0033801344822294
2008057	17	0.00894982942946243	0.0688883664768198
2008057	18	0.0398610134760293	0.398803229841595
2008057	19	0.0715558915221405	0.658778554748818
2008057	20	0.0822710759196743	0.625719557165122
2008057	21	0.0955572661169965	0.657620985864598
2008057	22	0.106359669095779	0.808413118638466
2008057	23	0.123439551029998	1.07255646890442
2008058	0	0.177926181800133	1.47074574986826
2008058	1	0.169997832203055	1.07815950305187
2008058	2	0.166873171311456	1.13802779497461
2008058	3	0.193883079411172	1.67425255697421
2008058	4	0.239530021484522	2.17115623195076
2008058	5	0.180837614113982	1.54651899308792
2008058	6	0.131939133855682	1.22189717846028
2008058	7	0.157443225030275	1.65202981984023
2008058	8	0.192111766604802	2.04519704171752
2008058	9	0.221268864325972	2.33687309032985
2008058	10	0.255689192933467	2.69146753145785
2008058	11	0.265811585016792	2.72728682549842
2008058	12	0.266897779506661	3.43367168683541
2008058	13	0.219275101886821	2.56931176788009
2008058	14	0.210588334821297	2.27320971066664
2008058	15	0.22905925108364	2.16367618971988
2008058	16	0.223678911103605	1.73845691097478
2008058	17	0.191654674941132	1.25240728447611
2008058	18	0.137890740154648	1.04331190073131
2008058	19	0.0757162181419329	0.747764895863586
2008058	20	0.154186940917785	2.1306248046876
2008058	21	0.292411094237917	3.52883590354739
2008058	22	0.339753400557353	3.94631854070817
2008058	23	0.335527645352591	3.82653242164236
2008059	0	0.330127593750866	3.76529168827944
2008059	1	0.350006466137409	4.14879587794151
2008059	2	0.370552137529355	4.15567691117404
2008059	3	0.348485211862564	3.27199091454163
2008059	4	0.315822507257665	2.32500192720734
2008059	5	0.262133046368972	1.45859201990025
2008059	6	0.225130651658587	1.10552836609631
2008059	7	0.227124415931451	1.08625335130272
2008059	8	0.233361989656198	1.26657372506967
2008059	9	0.236042411078315	1.36434956314088
2008059	10	0.223290477566353	1.45961708037827
2008059	11	0.227295735346578	1.71204353865247
2008059	12	0.221813109783513	1.61998772083207
2008059	13	0.204526439145222	1.44840770246341
2008059	14	0.183702239680141	1.1930973354017
2008059	15	0.166842762078999	0.926000808155873
2008059	16	0.152561230046399	0.656466410954392
2008059	17	0.139443243739427	0.441229307264375
2008059	18	0.120700341462576	0.266869040903356
2008059	19	0.100328765069303	0.166997720657771
2008059	20	0.0858644534881912	0.138722259182374
2008059	21	0.0716381864280074	0.132663782740759
2008059	22	0.0637492428279796	0.165920809918729
2008059	23	0.0648309408724963	0.213266516951663
2008060	0	0.0755368016816025	0.273481927867201
2008060	1	0.0885866434676136	0.32557262326928
2008060	2	0.0878385333394919	0.294455746459294
2008060	3	0.0739657254458532	0.194163149277263
2008060	4	0.0625297510487801	0.150802843420799
2008060	5	0.0568144865881799	0.134419079173351
2008060	6	0.0543267156819198	0.132812292926824
2008060	7	0.0516295261386636	0.1705912786298
2008060	8	0.0760017704882243	0.382570886439013
2008060	9	0.0843253664919583	0.413049543352248
2008060	10	0.076909858115475	0.366971506195423
2008060	11	0.0751206783871929	0.397534908345629
2008060	12	0.0821777814895699	0.488393612640611
2008060	13	0.0834696023509815	0.460322538734488
2008060	14	0.0706686969332426	0.316356452821065
2008060	15	0.0530080836000377	0.184838250362902
2008060	16	0.0455496479539166	0.132475617568628
2008060	17	0.0412466555475112	0.0973066797807186
2008060	18	0.0430080688416107	0.0887155323598113
2008060	19	0.0417714261608031	0.0806337132462165
2008060	20	0.0385389254103472	0.0602965893626372
2008060	21	0.0272002413197301	0.0399485267612931
2008060	22	0.00755632064619166	0.014009520495812
2008060	23	0.00346482074902166	0.0329874715555827
