# Supplementary material for: A comparison of sea salt emission parameterizations in northwestern Europe using a chemistry transport model setup
Source: Copernicus journal article supplement (doi:10.5194/acp-16-9905-2016), 2016-08-08
Supplement: Supplementary file 2 [file acp-16-9905-2016-supplement.zip › conc/conc.timeseries.values.win2008.base.Na.DE0044R.csv]

doy	hour	pm2.5	pm10
2008001	0	0.249021975345451	0.61126952096308
2008001	1	0.247155731202932	0.655788768902476
2008001	2	0.235884693434462	0.593983624455547
2008001	3	0.218641936434434	0.544424143462074
2008001	4	0.202215310831525	0.540891370693379
2008001	5	0.184769705815195	0.510271377401117
2008001	6	0.170925431873005	0.500891513178489
2008001	7	0.167489536774411	0.499660521277013
2008001	8	0.163173791219868	0.491349400162745
2008001	9	0.171037584016801	0.547878616967392
2008001	10	0.197843239968089	0.666204748027176
2008001	11	0.214013227764017	0.612688939568334
2008001	12	0.240926536635695	0.581117854079056
2008001	13	0.26072518626526	0.642190410179443
2008001	14	0.2900857232921	0.839851985286863
2008001	15	0.298672743090177	0.830880501765503
2008001	16	0.289264604600892	0.684987095007912
2008001	17	0.279205883159297	0.589729881772745
2008001	18	0.275942182636916	0.546262198573712
2008001	19	0.265439438728559	0.477980895356737
2008001	20	0.255451733444993	0.456079308679753
2008001	21	0.244497291326379	0.427546486385139
2008001	22	0.230440450784626	0.398450446081055
2008001	23	0.21146361597611	0.368400445291118
2008002	0	0.197328007849284	0.342935441339941
2008002	1	0.183140907257545	0.316752539043957
2008002	2	0.173683836807478	0.290519370609788
2008002	3	0.169469729992475	0.263640818820774
2008002	4	0.162206034520714	0.233454641539717
2008002	5	0.152841851280604	0.211145807990445
2008002	6	0.145169978293731	0.201728075988742
2008002	7	0.145094409639445	0.199063361524478
2008002	8	0.147156513168528	0.199879529738797
2008002	9	0.157304271004468	0.208881983204434
2008002	10	0.181588146784854	0.230922171361469
2008002	11	0.189953289154274	0.248405175703278
2008002	12	0.172880108254991	0.266064047126835
2008002	13	0.108283053058565	0.255555774287021
2008002	14	0.0620476836571188	0.225410135995205
2008002	15	0.0483129444775651	0.132236794734581
2008002	16	0.0219768367007917	0.0371883578684644
2008002	17	0.0153099377004563	0.0225805585827684
2008002	18	0.0157682808120591	0.027794252247365
2008002	19	0.0166780578585956	0.0325439111585238
2008002	20	0.0138459166232214	0.0246788537269566
2008002	21	0.0102241442812647	0.0178375837996666
2008002	22	0.00827997963205141	0.0147558140556458
2008002	23	0.00712151771388859	0.0136636784233519
2008003	0	0.00684480510293078	0.0134793303727275
2008003	1	0.00722126181108301	0.0133161975404002
2008003	2	0.00589935286485558	0.00986998401209717
2008003	3	0.00441847154021899	0.00776485607822384
2008003	4	0.00517077572402142	0.0104002743760727
2008003	5	0.0090663327452713	0.0234577483672243
2008003	6	0.0116250773723859	0.0304836482762064
2008003	7	0.0116315330090834	0.0321754839840719
2008003	8	0.0141587161140314	0.0441051968445095
2008003	9	0.0212628915738038	0.0678509909341034
2008003	10	0.0316416021531342	0.0861683523953262
2008003	11	0.0372628453284136	0.087006082972204
2008003	12	0.0425498265685685	0.0841537106158631
2008003	13	0.0435910450629998	0.0757705229704084
2008003	14	0.0434829565767611	0.0733255695080011
2008003	15	0.0435928392146161	0.0750629296005284
2008003	16	0.0377736406210633	0.0753938048760974
2008003	17	0.0308769536257536	0.079066254777164
2008003	18	0.0304990670786793	0.0867071613832871
2008003	19	0.0330219260647492	0.0958010308323288
2008003	20	0.0339910791838433	0.0959077374808463
2008003	21	0.0336045698019751	0.0925203316109323
2008003	22	0.0332927515495292	0.0905942191655282
2008003	23	0.0336175104117136	0.0887237816729292
2008004	0	0.03450995103135	0.0876784453349001
2008004	1	0.0351435465218675	0.0870925892451673
2008004	2	0.0363548509155528	0.0899033383332766
2008004	3	0.0381278808247514	0.0939187509572605
2008004	4	0.0396484300608297	0.0957389992777826
2008004	5	0.0401736365833783	0.0915712719611244
2008004	6	0.0388333848556152	0.0785566056450719
2008004	7	0.037209535110401	0.0701494597851344
2008004	8	0.0355366942458966	0.067744667734112
2008004	9	0.0433873032317208	0.0944126579554317
2008004	10	0.0451855843038458	0.0943281876896649
2008004	11	0.0455674843706261	0.0915904946845028
2008004	12	0.0451549026773498	0.0880718768010338
2008004	13	0.0427621606028136	0.0801340642417284
2008004	14	0.0415612731826167	0.0784071821482766
2008004	15	0.0404076412121639	0.0736508410938417
2008004	16	0.0374253756430568	0.0609974611460036
2008004	17	0.0340754597143124	0.050254636488227
2008004	18	0.0333182969924128	0.0484306806503857
2008004	19	0.032801424088745	0.0469944441401318
2008004	20	0.0311593351235186	0.0427925753066605
2008004	21	0.0291087611006695	0.0386281830870883
2008004	22	0.0285484377306332	0.0378696459537271
2008004	23	0.0300322732806655	0.0404401009230037
2008005	0	0.0321316170977846	0.0440678202683674
2008005	1	0.0328202818593275	0.0499251073811871
2008005	2	0.0476723916473106	0.1028440405817
2008005	3	0.0623069695999622	0.140842122900552
2008005	4	0.0707080575299735	0.146872431917411
2008005	5	0.0718796407092012	0.134469858825187
2008005	6	0.0720974236931449	0.12429001199242
2008005	7	0.0699666492784832	0.115318517442808
2008005	8	0.0706651837201711	0.119249887285386
2008005	9	0.074956269693752	0.129263052311288
2008005	10	0.0768066585351021	0.142378766146725
2008005	11	0.0800331567214002	0.163250626720398
2008005	12	0.0806771100141887	0.175337292973314
2008005	13	0.0755653433040961	0.171215391197601
2008005	14	0.0706300273572995	0.172591599892419
2008005	15	0.0596943035584826	0.161645770561168
2008005	16	0.0566610649233622	0.154537830756839
2008005	17	0.0435703574370664	0.111891132938625
2008005	18	0.0302443891538102	0.0623447909451858
2008005	19	0.0235244200221454	0.039293637490997
2008005	20	0.02016304244406	0.0325909281164112
2008005	21	0.0175991344446213	0.031607151322819
2008005	22	0.0165297169682374	0.0329432109022232
2008005	23	0.0157211924015304	0.0327159679165359
2008006	0	0.0151979791502466	0.0324465111155519
2008006	1	0.0155587177531866	0.0351209365193312
2008006	2	0.0176260130646841	0.0397197426367316
2008006	3	0.020834706188332	0.0459553423351664
2008006	4	0.0245638515491682	0.0597884172599275
2008006	5	0.029518766939388	0.0823986190381771
2008006	6	0.0331494083573165	0.102499559611695
2008006	7	0.0321974539635123	0.113942852343223
2008006	8	0.0334718147613221	0.120120813508914
2008006	9	0.0327531952396467	0.117992777187735
2008006	10	0.0293214515132116	0.108009655915816
2008006	11	0.0250922139672562	0.0894036398550952
2008006	12	0.0199693158507304	0.0659707941315393
2008006	13	0.0149971250091372	0.0468005858100672
2008006	14	0.0141917433294178	0.0446713134436989
2008006	15	0.0142289765118039	0.0480587391294192
2008006	16	0.0113109498379106	0.0435152962978832
2008006	17	0.00788350520488733	0.0369784477787143
2008006	18	0.00759013263930359	0.0463437510401713
2008006	19	0.0141976727315125	0.105281109619497
2008006	20	0.023443613608016	0.189376806359916
2008006	21	0.028236983080572	0.236806460170357
2008006	22	0.0292843896812615	0.248264501457586
2008006	23	0.0272492424777823	0.233263995799569
2008007	0	0.0266421740511329	0.221376163445796
2008007	1	0.0280513267032587	0.224848341638284
2008007	2	0.0309980839320063	0.234429719676993
2008007	3	0.0375871252607125	0.238673310250088
2008007	4	0.0435577303051774	0.232482447206135
2008007	5	0.0454889028609888	0.249280854988554
2008007	6	0.0515396685691338	0.338687047434704
2008007	7	0.0717737649865225	0.513851767105315
2008007	8	0.0684761506758969	0.506026612483514
2008007	9	0.080226997740789	0.611938507377529
2008007	10	0.0731575721481082	0.505274867902274
2008007	11	0.0503516484443396	0.281487414533962
2008007	12	0.0103631623971866	0.0493521580557402
2008007	13	0.0123641713979814	0.192512817897086
2008007	14	0.0867044212611603	1.07602164965373
2008007	15	0.095985838208825	0.914250557024028
2008007	16	0.0658342883187047	0.519032843582984
2008007	17	0.0753911898954297	0.539046600749748
2008007	18	0.111435284642637	0.868149170511539
2008007	19	0.114103521422061	0.911262790688084
2008007	20	0.109347280892252	0.815496987899473
2008007	21	0.113344229827156	0.832106049854766
2008007	22	0.107638661112417	0.732639809117652
2008007	23	0.103412373919807	0.619344993511867
2008008	0	0.0953050508567834	0.470923186258465
2008008	1	0.0712610649950095	0.348890765714447
2008008	2	0.0425148493677744	0.55108158015921
2008008	3	0.047554967466299	0.66129448927502
2008008	4	0.0317176988123834	0.334807894980478
2008008	5	0.0358078121511698	0.33427205535201
2008008	6	0.0730545915463364	0.620034082519855
2008008	7	0.0903373226751409	0.675385586120992
2008008	8	0.0898773788019555	0.558184757688553
2008008	9	0.0907887051867555	0.45731502523388
2008008	10	0.102116331824973	0.40451953166858
2008008	11	0.104831361380555	0.28341778190232
2008008	12	0.0951535009613257	0.207573644245952
2008008	13	0.0925802680932494	0.301055427952444
2008008	14	0.0897137108121197	0.316922990550012
2008008	15	0.0760762855972373	0.235526365710883
2008008	16	0.0709604029497389	0.194082945808713
2008008	17	0.077664516990868	0.222157763045513
2008008	18	0.0755488221078749	0.2096451086765
2008008	19	0.0588864412779103	0.116001230049109
2008008	20	0.048817328201717	0.0803920629451051
2008008	21	0.0443653162800325	0.0701967306916569
2008008	22	0.0437173996205949	0.0721999542741062
2008008	23	0.0487436851132084	0.0961719136130084
2008009	0	0.055948424407675	0.126733579804274
2008009	1	0.0580599879339813	0.139848377574592
2008009	2	0.0544788165581853	0.135526735257276
2008009	3	0.0491615463866256	0.127889340488506
2008009	4	0.0420617986707891	0.114933837563353
2008009	5	0.0457534457572234	0.180601745584803
2008009	6	0.0667414465065659	0.288071032385953
2008009	7	0.0754351249484847	0.290153430796689
2008009	8	0.0524399058594693	0.159561462884755
2008009	9	0.0468482073784355	0.121583793654882
2008009	10	0.048605857121516	0.121552700376765
2008009	11	0.0578642033888636	0.17064360511614
2008009	12	0.0520309474567501	0.163696831193187
2008009	13	0.0387296099206658	0.119112744950624
2008009	14	0.0377581452773873	0.103781305166834
2008009	15	0.0382559354811896	0.0882065592945907
2008009	16	0.0349753358635575	0.0862575343197643
2008009	17	0.0310080116802378	0.0769393345914152
2008009	18	0.0266941037652109	0.0688468199080705
2008009	19	0.0221356832065229	0.0576119718698392
2008009	20	0.0179266493585203	0.0459078026758982
2008009	21	0.0146107190809104	0.0380275465431414
2008009	22	0.0122893309294295	0.032800523800585
2008009	23	0.0112167691123673	0.0296452243172221
2008010	0	0.0105327435538552	0.0274205016294661
2008010	1	0.0104076480377633	0.0263124880591034
2008010	2	0.0103214755261941	0.0259236501896478
2008010	3	0.00986701000975499	0.0250783079481559
2008010	4	0.00930090854318792	0.022379171069736
2008010	5	0.0075890303934408	0.0181566525418401
2008010	6	0.00647900696515462	0.0187624214311374
2008010	7	0.00722846978576735	0.0340199339722644
2008010	8	0.0114257053860418	0.0777339696147198
2008010	9	0.0117070958646817	0.0832616542196844
2008010	10	0.0196382854447366	0.0937125976031073
2008010	11	0.00963536866896076	0.0256666041512038
2008010	12	0.00889564337294963	0.0200330736852785
2008010	13	0.00979431573769591	0.0220025524909017
2008010	14	0.0117769605126354	0.0347769193044597
2008010	15	0.0135846787122511	0.0508678979264655
2008010	16	0.0183933469250094	0.0668849737066126
2008010	17	0.0195050402735846	0.0664321652507297
2008010	18	0.020622362907977	0.0693062272034741
2008010	19	0.0210288140204955	0.0705722221040109
2008010	20	0.0200791366383739	0.0609266598064438
2008010	21	0.0169686275737418	0.0484717487803501
2008010	22	0.0147550627348794	0.0420142913798564
2008010	23	0.0127699777590947	0.0420209777444648
2008011	0	0.0163381789411955	0.0644933202985708
2008011	1	0.0167040366994686	0.070271579249109
2008011	2	0.0162815043782681	0.0645367788237675
2008011	3	0.0164234335357341	0.0562197285450472
2008011	4	0.0163206094575427	0.0556305261559589
2008011	5	0.0169434623972201	0.0597630126343989
2008011	6	0.0154468787442665	0.0547444516060411
2008011	7	0.01368641483259	0.0469179761854255
2008011	8	0.0117887436088107	0.0381234096103393
2008011	9	0.0118019905856588	0.0334061808042741
2008011	10	0.0114634983977389	0.0268338290177118
2008011	11	0.0115694545781229	0.0270548403346535
2008011	12	0.0117007705077614	0.0279898379586748
2008011	13	0.0113403381539402	0.02695032851638
2008011	14	0.0111127436049182	0.0269940293927519
2008011	15	0.0105384883562873	0.0264051499955578
2008011	16	0.0103069335391265	0.0269992075963035
2008011	17	0.0122458044164582	0.0360590657391127
2008011	18	0.0134884291019722	0.0456707377492172
2008011	19	0.0152979786710659	0.0567462450596603
2008011	20	0.0207112493277762	0.0767059980073156
2008011	21	0.0235746044895162	0.0814979158749435
2008011	22	0.0210537160433246	0.0669175185593903
2008011	23	0.0176265141673155	0.0557017273186741
2008012	0	0.0157341389889856	0.04936472716626
2008012	1	0.0155957710629828	0.046501615884762
2008012	2	0.0166306908692684	0.0500200731431254
2008012	3	0.0173350997091866	0.0540064964207823
2008012	4	0.0170375633723351	0.0545638188549059
2008012	5	0.0162402707019041	0.0529215465953986
2008012	6	0.0154401243721665	0.0507160421475825
2008012	7	0.0132854613139072	0.0425301027859253
2008012	8	0.0107572524603863	0.0346130897958301
2008012	9	0.00885988000549986	0.0337897674420202
2008012	10	0.0233285922861449	0.076579761156184
2008012	11	0.0468971100329214	0.130557428353404
2008012	12	0.0639589677932018	0.200378897975802
2008012	13	0.0840714148841844	0.262461631760155
2008012	14	0.0852573419969316	0.234165174232391
2008012	15	0.073602363076424	0.179629073575494
2008012	16	0.0656966980752657	0.149910656831818
2008012	17	0.0606452167601644	0.135732662428731
2008012	18	0.0574588729951351	0.132988213216638
2008012	19	0.0555693941247087	0.133749923879273
2008012	20	0.0549073182687545	0.12485992873585
2008012	21	0.0559539273971689	0.119590841178178
2008012	22	0.0566635853984581	0.113075540295977
2008012	23	0.0525072906124446	0.0910997451821428
2008013	0	0.0528567293324252	0.0898117383214217
2008013	1	0.0523475250567186	0.0921378335876044
2008013	2	0.052521654690849	0.0962830911538824
2008013	3	0.0514699876115731	0.0999068036517211
2008013	4	0.0527739196795158	0.114511474119931
2008013	5	0.0521082771593251	0.117837766634395
2008013	6	0.0533609509051913	0.123477144299593
2008013	7	0.0523471608697026	0.118606841280109
2008013	8	0.0516453236542934	0.113996769524212
2008013	9	0.050734846396274	0.108244638540796
2008013	10	0.0496679040590313	0.105436647263272
2008013	11	0.0459635509962969	0.0966872022162153
2008013	12	0.0536897419981762	0.137152292307226
2008013	13	0.0508890927126778	0.120665663168133
2008013	14	0.0512052169551515	0.119639322658036
2008013	15	0.0541612988529968	0.130985539844934
2008013	16	0.0570448550915679	0.137531955976234
2008013	17	0.056967841733521	0.129508708598948
2008013	18	0.0536434159203081	0.113313379985191
2008013	19	0.050809314606691	0.103390954773795
2008013	20	0.0502601123195891	0.100137436194408
2008013	21	0.0490691882702043	0.0981615795235764
2008013	22	0.0443598371142763	0.0871008787760331
2008013	23	0.0348062942933169	0.0725601871598008
2008014	0	0.0282023010371364	0.0607152556865886
2008014	1	0.0240554296530144	0.0544973642312038
2008014	2	0.0219321978103094	0.0543548069057136
2008014	3	0.0216354887782664	0.0598854152783503
2008014	4	0.021617032188024	0.0659378885271524
2008014	5	0.0227180536869478	0.0733705633773509
2008014	6	0.0240038081584001	0.086108746017177
2008014	7	0.0264658400633439	0.0943717066619498
2008014	8	0.0278367812087902	0.090144455034477
2008014	9	0.0267727574337631	0.0781345961854698
2008014	10	0.0455816042118192	0.110075499723975
2008014	11	0.0472860780568663	0.100469217184881
2008014	12	0.0426274192039676	0.091786435041585
2008014	13	0.0376264474285978	0.0816525542256175
2008014	14	0.0370581139474412	0.0770048450154237
2008014	15	0.0365634953747756	0.0753341960494401
2008014	16	0.0364128684890229	0.0719911268876019
2008014	17	0.0348674636030813	0.0676755311989682
2008014	18	0.0350877004509591	0.0761305061538634
2008014	19	0.0376346670483722	0.0890297079641363
2008014	20	0.0385519893440095	0.0941908598395161
2008014	21	0.0368340347436056	0.09431961551746
2008014	22	0.0292500357178186	0.0717119058247189
2008014	23	0.0277702433741484	0.0771082143455026
2008015	0	0.0283675468060475	0.0937820822432724
2008015	1	0.0271039607052604	0.0903983205354133
2008015	2	0.0265587816574602	0.0823887750669506
2008015	3	0.0275049101896136	0.083262263419616
2008015	4	0.0299197302346175	0.0876642606596946
2008015	5	0.0270226836695806	0.0637300176537419
2008015	6	0.024263674554834	0.0435723385009166
2008015	7	0.023534641977339	0.0382337949455988
2008015	8	0.023000037658911	0.0384022175070249
2008015	9	0.0215334600320737	0.0408444266690015
2008015	10	0.0215364950228639	0.0493302396579163
2008015	11	0.0213813457424305	0.0542670422109599
2008015	12	0.0227254623223692	0.070697015098505
2008015	13	0.0240209184238559	0.0908715274333958
2008015	14	0.0268946633794129	0.11706828547393
2008015	15	0.0290377179425641	0.124036629841409
2008015	16	0.0244036594990723	0.0891362205642892
2008015	17	0.0195904005795667	0.066142035586914
2008015	18	0.0198873887669156	0.0752842601871886
2008015	19	0.0225831775377559	0.103757579120772
2008015	20	0.0204507613905326	0.0982610735336617
2008015	21	0.0184480532683208	0.0880495836074724
2008015	22	0.0189118597736399	0.0875334136627282
2008015	23	0.0241785166622342	0.105838181216258
2008016	0	0.0261737241840915	0.102013693022124
2008016	1	0.0296199216638738	0.10504697130572
2008016	2	0.0283723238389308	0.0933666876989658
2008016	3	0.0264584017587843	0.0836141166143448
2008016	4	0.0220798644979219	0.0648056606034566
2008016	5	0.0151882803849056	0.0396325244252185
2008016	6	0.00668116838150781	0.0149682317476909
2008016	7	0.00310537808539046	0.00778330360483691
2008016	8	0.00271225080844623	0.00697465637172105
2008016	9	0.00267088118236472	0.00679940743029549
2008016	10	0.00240394022681665	0.00595257274892292
2008016	11	0.00248930679808206	0.00989648824841098
2008016	12	0.00318321001219221	0.0223159644632322
2008016	13	0.00960451528043289	0.0832497322013694
2008016	14	0.0192468822617952	0.137294602350045
2008016	15	0.0273514556499466	0.156458134362526
2008016	16	0.0310818277658778	0.133727710834515
2008016	17	0.0306618394721811	0.102788514152554
2008016	18	0.0273390532812943	0.0731504707082841
2008016	19	0.0202224504737521	0.0454412061677293
2008016	20	0.013127682781815	0.030201913542877
2008016	21	0.0114850518368896	0.0263971054038964
2008016	22	0.0113807244095177	0.0259379193540049
2008016	23	0.0107194182036774	0.0239769871929195
2008017	0	0.0100599915369521	0.0225738921739842
2008017	1	0.00984063026197653	0.0240934725142901
2008017	2	0.0102807089030371	0.0325527616936625
2008017	3	0.0108100856034824	0.0426544657211852
2008017	4	0.0105677410779946	0.0461337762578045
2008017	5	0.0100786276024166	0.0457132550089225
2008017	6	0.00935613859250421	0.0450340509786385
2008017	7	0.00925977848364142	0.0463819803663829
2008017	8	0.00968527507268463	0.0525387512330048
2008017	9	0.013195302247676	0.0695899646158424
2008017	10	0.0166700491133939	0.0661737906503152
2008017	11	0.0155002582942588	0.0466025900925998
2008017	12	0.0101170249478493	0.0259821999734791
2008017	13	0.00702193032444694	0.0169766080269806
2008017	14	0.0112206023744563	0.0292048902069412
2008017	15	0.0275363615606567	0.0720194297600885
2008017	16	0.0363837402644469	0.098333550982202
2008017	17	0.0358930608597466	0.0825534130097897
2008017	18	0.0340369669077385	0.0613041315524698
2008017	19	0.029815712974407	0.0424644591580887
2008017	20	0.0209957763738844	0.0301210770320887
2008017	21	0.019293956756426	0.0536721799422779
2008017	22	0.0392328274293392	0.105853562328048
2008017	23	0.0425222099201799	0.146800496514558
2008018	0	0.0585863735008499	0.133527022830828
2008018	1	0.060078239825055	0.0987819327410907
2008018	2	0.0379808617606373	0.0606340217633195
2008018	3	0.020071803471412	0.0311688666710172
2008018	4	0.00872621564868743	0.0151610626310571
2008018	5	0.00688523296606678	0.0527756307432809
2008018	6	0.0233579810171903	0.22966693118107
2008018	7	0.0398970019085881	0.284563013286858
2008018	8	0.0457773922326041	0.239783037008121
2008018	9	0.0389797509409051	0.132659997278093
2008018	10	0.0265939667790849	0.0978449514961675
2008018	11	0.0551537902372335	0.402137241238907
2008018	12	0.0648337657791736	0.418469636211913
2008018	13	0.0447937743095479	0.20472001967612
2008018	14	0.0267534850302504	0.127585264638951
2008018	15	0.0327649068706711	0.201498850385708
2008018	16	0.0505149297390704	0.254535308849342
2008018	17	0.0593566764191558	0.232415896453966
2008018	18	0.0607217790366871	0.184106233510829
2008018	19	0.0651210511188753	0.179830888756316
2008018	20	0.0652766686418705	0.14448915298548
2008018	21	0.0684120711090324	0.128345069983611
2008018	22	0.16662168325316	0.422521888335836
2008018	23	0.230956246229889	0.613484594057694
2008019	0	0.180237685019278	0.342303752598049
2008019	1	0.124250489667686	0.318067332627216
2008019	2	0.14430530966785	0.559035001498891
2008019	3	0.172747977657389	0.921838340273997
2008019	4	0.187246266522049	1.27700633406077
2008019	5	0.165024511188367	1.20443059065067
2008019	6	0.136004992364101	0.903902160094629
2008019	7	0.110892153875269	0.755302485051459
2008019	8	0.0899749141087797	0.60307569867254
2008019	9	0.055666072793436	0.350536972050677
2008019	10	0.0299471024151955	0.173410447764888
2008019	11	0.0190050745330221	0.107530004460046
2008019	12	0.0138827804874325	0.0733158854148514
2008019	13	0.0083052448429673	0.0413429393841247
2008019	14	0.00393270098010623	0.0201747516902046
2008019	15	0.000828373520811352	0.00464146840687725
2008019	16	0.00109147412636189	0.00966110040025641
2008019	17	0.013545433633591	0.0875182440438336
2008019	18	0.0512944131967678	0.296195475512163
2008019	19	0.0991890659214287	0.492251955888556
2008019	20	0.143470582610712	0.617904131550786
2008019	21	0.166857328187546	0.664188689223054
2008019	22	0.166194952236567	0.644419335655233
2008019	23	0.164087015899725	0.616315895797673
2008020	0	0.160926241103316	0.582483351489088
2008020	1	0.162517939732129	0.490123262530122
2008020	2	0.14810308837554	0.379155152965279
2008020	3	0.140706639203681	0.347022074043932
2008020	4	0.135574557727506	0.32447137850602
2008020	5	0.126084669382991	0.292409801661531
2008020	6	0.0691165542491954	0.160691708448025
2008020	7	0.0478020058899846	0.123817158692752
2008020	8	0.0499513829060711	0.108978947923194
2008020	9	0.00683027770493786	0.0139745483267374
2008020	10	0.00179936512164996	0.00389454490519907
2008020	11	0.0102484159749291	0.0319478136901451
2008020	12	0.0264514922283855	0.0654989009304039
2008020	13	0.0291587737928644	0.09449934279088
2008020	14	0.0305517827707409	0.0987826947543032
2008020	15	0.0190486553628015	0.074241202734671
2008020	16	0.0141612746610668	0.0742853124332504
2008020	17	0.0181204171021758	0.107847860088078
2008020	18	0.0194340338612888	0.11459540770788
2008020	19	0.0152139365934094	0.0819862474396734
2008020	20	0.00992426915498221	0.0489583652161649
2008020	21	0.00636384699338953	0.0257032109586508
2008020	22	0.00358874475762099	0.01020830544627
2008020	23	0.00223326148518267	0.00469233596628145
2008021	0	0.00134897698044613	0.00307781544589405
2008021	1	0.00302578359322852	0.0109257261067806
2008021	2	0.0185977647041567	0.0792638718717937
2008021	3	0.0107303234690766	0.0453775564268457
2008021	4	0.00882939116520445	0.0409944655391008
2008021	5	0.00591298857660279	0.0254448868382121
2008021	6	0.00211449205417135	0.0102195031042934
2008021	7	0.0026890477061845	0.0203408970641629
2008021	8	0.00501016183011571	0.0328440714536376
2008021	9	0.0287600578702425	0.183952660326973
2008021	10	0.034922175418088	0.213358732700011
2008021	11	0.0412133853027089	0.317497011986256
2008021	12	0.0369011065520295	0.270507282485497
2008021	13	0.0222029759679633	0.126358519376051
2008021	14	0.0185953465769483	0.0904933554871551
2008021	15	0.0145509529742007	0.0752814316119089
2008021	16	0.0133862230089824	0.0573816899415979
2008021	17	0.00879266931082017	0.0394841467351087
2008021	18	0.00496768858233436	0.0230800827825499
2008021	19	0.01079272977282	0.0650723948743342
2008021	20	0.0123924872151856	0.0579890452291233
2008021	21	0.0120825871570374	0.0387981898808464
2008021	22	0.010439242878842	0.028326245340401
2008021	23	0.00480474707468287	0.0129853912506457
2008022	0	0.00156908842589134	0.00412963239981971
2008022	1	0.00106284105450128	0.00312753116539849
2008022	2	0.000846402849785081	0.00410983987043832
2008022	3	0.00108831164211619	0.00834277924582764
2008022	4	0.000687648383801458	0.0046677554936385
2008022	5	0.000395175790597402	0.00234387215252556
2008022	6	0.00969606758324539	0.0617244194496547
2008022	7	0.146754689565696	1.08167732373538
2008022	8	0.231453231614839	1.16967398877882
2008022	9	0.26505398208318	1.25643148889682
2008022	10	0.235460354826883	1.20567544559129
2008022	11	0.213486500986992	0.991827084562467
2008022	12	0.194860258413113	0.706107918301176
2008022	13	0.187578840350409	0.592607127483728
2008022	14	0.185290318380616	0.588361144090206
2008022	15	0.191278306190676	0.529849168765999
2008022	16	0.196627436593218	0.4240092422373
2008022	17	0.202379355064835	0.376698144859703
2008022	18	0.205149768969074	0.352860204333199
2008022	19	0.194768368531068	0.359893490073639
2008022	20	0.199540459080886	0.432808185309459
2008022	21	0.191578695839033	0.448770329873618
2008022	22	0.179929607065981	0.48918120020887
2008022	23	0.160814508268355	0.541212092926089
2008023	0	0.126852355491623	0.589252506773822
2008023	1	0.089223020894977	0.573323504088978
2008023	2	0.0773983971324551	0.502777696095993
2008023	3	0.0731923679772262	0.401583882123631
2008023	4	0.0726052910683192	0.341638627795692
2008023	5	0.0849919193499046	0.345803568955896
2008023	6	0.10193369087828	0.368765269831048
2008023	7	0.133982032224911	0.582434496611323
2008023	8	0.140935836374274	0.568768735885106
2008023	9	0.146561070049107	0.488417324249634
2008023	10	0.153416306453604	0.41641501751891
2008023	11	0.144152188339815	0.337570018094206
2008023	12	0.190498444554217	0.555029411606511
2008023	13	0.222941302740857	0.550541665385139
2008023	14	0.232391170768813	0.520967377423106
2008023	15	0.220198716806802	0.424402187353002
2008023	16	0.172626286554029	0.258469813914889
2008023	17	0.134635812933245	0.198467520847966
2008023	18	0.11039043083323	0.17837857514587
2008023	19	0.0951140730982625	0.177996259576318
2008023	20	0.0863911773300193	0.169007818023617
2008023	21	0.0434096893375114	0.0790980819866629
2008023	22	0.014290579924823	0.0202062233154173
2008023	23	0.0224577901799372	0.0330075279728069
2008024	0	0.0336705095707842	0.0703079294769857
2008024	1	0.0449549245986857	0.116781283481986
2008024	2	0.0509182068226124	0.143357986479
2008024	3	0.0519447046024095	0.14154878710361
2008024	4	0.0485155770714193	0.15400112805141
2008024	5	0.0468000855104809	0.191812782893174
2008024	6	0.0443534751357508	0.219637967115646
2008024	7	0.0452398355084964	0.249434972591937
2008024	8	0.041274677526015	0.217909898905622
2008024	9	0.0411639112067087	0.215047647467728
2008024	10	0.040501981395796	0.193045939068182
2008024	11	0.0442528393488912	0.194597225377895
2008024	12	0.0469588416560027	0.176064401574274
2008024	13	0.0469876431115618	0.155765543822712
2008024	14	0.0452658358481129	0.14795944405408
2008024	15	0.0449102022822391	0.137023290899007
2008024	16	0.0410941515398134	0.129330999451659
2008024	17	0.0177421970188947	0.0605488978989424
2008024	18	0.0202001752901534	0.161753608347695
2008024	19	0.0848406077677073	0.57374409832942
2008024	20	0.144029093246453	0.803380004794732
2008024	21	0.176843461735451	0.818068959329986
2008024	22	0.159194305913546	0.686158781233095
2008024	23	0.107038249858838	0.656982313972829
2008025	0	0.0919987388476281	0.884242188950635
2008025	1	0.0899051737555615	0.905136436442477
2008025	2	0.0849342917414383	0.824651653428581
2008025	3	0.0881817797178397	0.73810611196117
2008025	4	0.0784123569918953	0.44310820495088
2008025	5	0.0715235259632821	0.308614263242102
2008025	6	0.0677278094968014	0.303279318862674
2008025	7	0.0889019100502148	0.447097383281215
2008025	8	0.104034637470443	0.44299470535213
2008025	9	0.129134056138138	0.4874384246744
2008025	10	0.128535997535304	0.449007970731582
2008025	11	0.110441755906949	0.377185222379317
2008025	12	0.092082440079019	0.371809202486589
2008025	13	0.0812512526921666	0.347546021713679
2008025	14	0.0783515627258753	0.357783496806432
2008025	15	0.0892492142989977	0.408808260508904
2008025	16	0.0941799124003011	0.378440020872514
2008025	17	0.0978510117488986	0.333481935950248
2008025	18	0.101009075346502	0.30800168358715
2008025	19	0.102326729574802	0.28442564143532
2008025	20	0.103282446917681	0.27058112582529
2008025	21	0.100904750553003	0.274758421737637
2008025	22	0.101373680034934	0.349168064033476
2008025	23	0.109878040917837	0.512601697662519
2008026	0	0.123343778834463	0.708241717856772
2008026	1	0.129991456237204	0.747510557294963
2008026	2	0.129064590141746	0.682654050589813
2008026	3	0.12346746735919	0.624214072085003
2008026	4	0.13033301877027	0.710301790166317
2008026	5	0.137114004393396	0.779800406712583
2008026	6	0.135836875498343	0.774377071695474
2008026	7	0.137159819549038	0.824497449541269
2008026	8	0.140260433371749	0.90340817423054
2008026	9	0.145099439849432	0.965994489912413
2008026	10	0.147289415887596	1.0606576114555
2008026	11	0.146121273941672	1.06731653825826
2008026	12	0.143244408290882	1.02124631266504
2008026	13	0.147246047783844	0.959954618938819
2008026	14	0.151945174139406	0.969197037128713
2008026	15	0.171742348350583	1.29065314726376
2008026	16	0.196031967605138	1.65729406366825
2008026	17	0.202155898343472	1.89076338051113
2008026	18	0.181890611084609	1.78799242556434
2008026	19	0.14204272496249	1.47662936826974
2008026	20	0.10615836579312	1.14420703497771
2008026	21	0.101519236786511	1.09657665105662
2008026	22	0.122855907865539	1.53881184593765
2008026	23	0.169955529312785	2.28510268228383
2008027	0	0.200464581041514	2.56134373824545
2008027	1	0.202501793337468	2.38729230688516
2008027	2	0.205159281358916	2.27085826431406
2008027	3	0.194573306765705	2.03718727657824
2008027	4	0.166281690945421	1.55280332183319
2008027	5	0.111452761469694	0.831049940491599
2008027	6	0.0496230119874948	0.302367459267468
2008027	7	0.0141100040414023	0.0702153590918176
2008027	8	0.00296896236328487	0.0124738268615951
2008027	9	0.000840905802752895	0.00355457483806462
2008027	10	0.000447235046925816	0.00268888931504106
2008027	11	0.000808538621601052	0.00921484590678635
2008027	12	0.00203181614961635	0.0242155597968661
2008027	13	0.00320070278108827	0.0324124316491032
2008027	14	0.00385279201152519	0.0351807412061012
2008027	15	0.00551410458378102	0.0554944939224481
2008027	16	0.0101530739439064	0.126505728459612
2008027	17	0.0205360469876454	0.248539405460025
2008027	18	0.038515377263326	0.379942908898451
2008027	19	0.0606829571956034	0.517777299361907
2008027	20	0.076201743653988	0.550398959120275
2008027	21	0.0844876779192537	0.567396445473791
2008027	22	0.0798479850181981	0.535828520570969
2008027	23	0.0751161269349959	0.535902417171635
2008028	0	0.0769936969037215	0.608991481821054
2008028	1	0.0740270175442457	0.597082231919277
2008028	2	0.0619662402229925	0.54479745716969
2008028	3	0.056356873130975	0.479991469150674
2008028	4	0.0500995389029846	0.393668454000088
2008028	5	0.0446003022473189	0.316206609978625
2008028	6	0.0427176577349235	0.245444128501955
2008028	7	0.0427333710924345	0.182594682919706
2008028	8	0.0461709863162479	0.147734625587442
2008028	9	0.0573192737426649	0.134499685711285
2008028	10	0.0799547707793532	0.145861450390438
2008028	11	0.121515486236806	0.199207289468215
2008028	12	0.191839351980517	0.313667142427733
2008028	13	0.266883967772561	0.46551507449647
2008028	14	0.287790506340884	0.519812754832186
2008028	15	0.27377470345392	0.528087797902217
2008028	16	0.243555815421535	0.483458732358563
2008028	17	0.216899729610388	0.452487739783715
2008028	18	0.194967057530506	0.456842531832216
2008028	19	0.196191217793682	0.427406300857437
2008028	20	0.208049650465412	0.464555305654926
2008028	21	0.207940134951673	0.40451262149843
2008028	22	0.210598747490379	0.351293435816924
2008028	23	0.202651033569498	0.305407681145113
2008029	0	0.185670208754955	0.30578754884544
2008029	1	0.167789732269557	0.277781883239463
2008029	2	0.15264810673666	0.24071588853232
2008029	3	0.146500165249902	0.238288464870044
2008029	4	0.147406108027577	0.250200164695745
2008029	5	0.144299624720871	0.259336215580091
2008029	6	0.144350230526496	0.263454018006619
2008029	7	0.144446564820131	0.265174007968474
2008029	8	0.143512367390833	0.267935956021737
2008029	9	0.161140170326439	0.317087171823194
2008029	10	0.167307127641801	0.412352116287623
2008029	11	0.170573433036606	0.63906775041909
2008029	12	0.182172384792185	0.7294948479336
2008029	13	0.190895102549294	0.805314152482502
2008029	14	0.190713439070258	0.898221865594169
2008029	15	0.18951833553499	0.966996246975787
2008029	16	0.182523589777899	0.974850823632325
2008029	17	0.176090768991061	0.934004841281225
2008029	18	0.170532549150709	0.876064897493924
2008029	19	0.15568028438755	0.824299476483467
2008029	20	0.148679704310394	0.7922026158967
2008029	21	0.14543906909694	0.750308874862903
2008029	22	0.136229166786201	0.65415391919763
2008029	23	0.120084612879423	0.529150326349534
2008030	0	0.103994273366588	0.467474759951775
2008030	1	0.101668834307451	0.478851985658171
2008030	2	0.106912839567973	0.56456370449854
2008030	3	0.120904884384885	0.697435149937138
2008030	4	0.137042577265472	0.800677432096718
2008030	5	0.146432332829618	0.851122594051177
2008030	6	0.146626411728303	0.862556347470054
2008030	7	0.142777906237127	0.842267131254803
2008030	8	0.13920683294724	0.820647614795408
2008030	9	0.163390429547316	1.06090500208522
2008030	10	0.176561205347357	1.00489206590762
2008030	11	0.192353870247427	0.959079265257615
2008030	12	0.161007905089774	0.670055724796833
2008030	13	0.130079593149321	0.480154822541189
2008030	14	0.101072295832626	0.329632824289087
2008030	15	0.0818106943334989	0.232176763309586
2008030	16	0.0605994079585201	0.166973741437944
2008030	17	0.0264277680779142	0.0853197640350534
2008030	18	0.017896812452737	0.064512659430124
2008030	19	0.0505874330100299	0.187094975590474
2008030	20	0.0640987938138133	0.216751171956005
2008030	21	0.0700824557343481	0.151211683626579
2008030	22	0.0694180272387965	0.115465511822521
2008030	23	0.0898606095810515	0.162906291829259
2008031	0	0.120502048246561	0.301721592525491
2008031	1	0.119302974913883	0.362198934613131
2008031	2	0.109495418527245	0.345682169162451
2008031	3	0.0897373489219404	0.229291578857789
2008031	4	0.0784567411257401	0.16984242672342
2008031	5	0.0769205854222585	0.165908969477764
2008031	6	0.0776793121869369	0.17593989704472
2008031	7	0.0785302059791778	0.204217838707769
2008031	8	0.0777473380955511	0.231678736840252
2008031	9	0.0985711698515497	0.463767180557847
2008031	10	0.124972985663356	0.744400529622197
2008031	11	0.12317887044358	0.673701795066134
2008031	12	0.13221745114785	0.718736703825049
2008031	13	0.0912692189292319	0.400473932229916
2008031	14	0.0732250823150488	0.280049705036365
2008031	15	0.0664866877723384	0.237878550122991
2008031	16	0.0584274510347837	0.203716357386121
2008031	17	0.0554612919391203	0.174713715896637
2008031	18	0.057880168052639	0.156335686811604
2008031	19	0.0583814932165753	0.136452937750722
2008031	20	0.046273582055412	0.104370639759934
2008031	21	0.0445891309331086	0.152683314989992
2008031	22	0.0525146863817839	0.221247460728743
2008031	23	0.0392508958605689	0.128535750657914
2008032	0	0.0344628789708421	0.103957205456962
2008032	1	0.0359919136217821	0.112352262377559
2008032	2	0.036541694690801	0.111427252419345
2008032	3	0.0336691616911432	0.0963961870222976
2008032	4	0.0298513589216217	0.0819825710850405
2008032	5	0.0282085334422952	0.0773066393624342
2008032	6	0.0278009764528404	0.0745172452139347
2008032	7	0.0260322749262412	0.074138181485461
2008032	8	0.0293890237048023	0.121139322846873
2008032	9	0.0401649410942036	0.186340956527773
2008032	10	0.0505265435460818	0.248629321689339
2008032	11	0.0663779728007914	0.326733549905795
2008032	12	0.0881945631316842	0.450769182256664
2008032	13	0.0996476544223121	0.475934548266418
2008032	14	0.11212131715804	0.521671224936859
2008032	15	0.12127583102293	0.591591436513716
2008032	16	0.125488586301621	0.579345603340465
2008032	17	0.131202041829272	0.51733181922098
2008032	18	0.128881292724663	0.473633012644461
2008032	19	0.123994055020226	0.458063480539373
2008032	20	0.119368533163367	0.400725160862473
2008032	21	0.114764227702841	0.358768456699309
2008032	22	0.109660730754023	0.338150935691011
2008032	23	0.109730936878067	0.35781113096784
2008033	0	0.117142427701446	0.379692964707048
2008033	1	0.127532509631814	0.433429977596762
2008033	2	0.173684836602841	0.770585285772753
2008033	3	0.235426473882131	0.987927837461893
2008033	4	0.39177680467525	1.57239668535389
2008033	5	0.432125963489258	2.29646175451997
2008033	6	0.348121788509463	2.23188615539279
2008033	7	0.293990258804129	2.33402254424443
2008033	8	0.436599632948267	3.86480159246929
2008033	9	0.488878173476732	4.18047930242314
2008033	10	0.48721327833058	3.88121931470694
2008033	11	0.500634870252936	3.70942916320884
2008033	12	0.466024355113094	3.27813171778006
2008033	13	0.304007455288384	1.93204985599268
2008033	14	0.279918053794485	2.08873752987583
2008033	15	0.28296303281329	2.09567735424406
2008033	16	0.20064690118996	1.27354672397805
2008033	17	0.145481972931975	0.805335605396905
2008033	18	0.186900726306469	0.911541471149691
2008033	19	0.252059179337964	1.09888510994661
2008033	20	0.260285920087103	1.00142626153859
2008033	21	0.253600978892275	0.845259919808791
2008033	22	0.228552067754912	0.605932820020801
2008033	23	0.203306617904722	0.443811126358852
2008034	0	0.199457114175198	0.383864832053272
2008034	1	0.203204743460185	0.362797473960853
2008034	2	0.212072734823699	0.329763310547437
2008034	3	0.209790075291159	0.285737832299717
2008034	4	0.207563465452435	0.278727518486073
2008034	5	0.205363672453371	0.284452509398174
2008034	6	0.203829600109628	0.296425094507105
2008034	7	0.202300225329082	0.311380240158397
2008034	8	0.19826923354927	0.320690258653335
2008034	9	0.205697668251229	0.373155360247517
2008034	10	0.208656659881631	0.370423087168791
2008034	11	0.175251200179559	0.263243175619131
2008034	12	0.150110303996569	0.216074810647562
2008034	13	0.144807722127618	0.256538780132114
2008034	14	0.148383466834088	0.320441288340333
2008034	15	0.147375648058822	0.308221151630246
2008034	16	0.140549503270948	0.255497077565986
2008034	17	0.139221939451716	0.24354256355614
2008034	18	0.141036877283216	0.252188411772064
2008034	19	0.143572461029778	0.218316669254452
2008034	20	0.154032753420165	0.218273966614118
2008034	21	0.166370711380909	0.217883343282758
2008034	22	0.174786581371119	0.212203252237464
2008034	23	0.179713014095483	0.21168004978768
2008035	0	0.181637084246059	0.210711201655048
2008035	1	0.178388074799603	0.205458626270855
2008035	2	0.170040145361009	0.196342287985799
2008035	3	0.161016006955284	0.18863910868226
2008035	4	0.155298071367981	0.18311796169658
2008035	5	0.151064152903806	0.178335561446479
2008035	6	0.149592729820017	0.17621652772215
2008035	7	0.147695357175306	0.176223571880842
2008035	8	0.147360713118731	0.176611299091812
2008035	9	0.154962563636181	0.198390003116929
2008035	10	0.155440785168598	0.205140230214263
2008035	11	0.147730482235404	0.196996725959533
2008035	12	0.133342465308313	0.174050197090929
2008035	13	0.115812777912415	0.147587662402553
2008035	14	0.106444624345098	0.137141298328124
2008035	15	0.110397115831809	0.143834456009075
2008035	16	0.118735701901198	0.151214090160663
2008035	17	0.107913421274036	0.141576894670625
2008035	18	0.0492610122233438	0.105639179849639
2008035	19	0.0307273867385653	0.156686958565956
2008035	20	0.0285672534491536	0.117060773709169
2008035	21	0.0279192525632247	0.0877923873865145
2008035	22	0.0267359478929064	0.0716375327066578
2008035	23	0.0237672047671874	0.0579507965265975
2008036	0	0.0232518598074615	0.0559455207121186
2008036	1	0.0246232705725304	0.062293946225641
2008036	2	0.027612166698938	0.0702324983092326
2008036	3	0.0349480981185375	0.115965741379098
2008036	4	0.0435669324284464	0.166276529864104
2008036	5	0.0434166003899064	0.151580109765168
2008036	6	0.0466475299547061	0.164021352268555
2008036	7	0.0463683188376704	0.151924754549336
2008036	8	0.0459588784362224	0.149581007308779
2008036	9	0.0436244254308796	0.131720050366903
2008036	10	0.0442076443226177	0.152937779063938
2008036	11	0.0493312377832928	0.205834489761861
2008036	12	0.0430943322418357	0.164543066630928
2008036	13	0.0371594287157356	0.136940585960065
2008036	14	0.0349803108518029	0.1262340084192
2008036	15	0.0353168641913253	0.123611414125067
2008036	16	0.0362354398768669	0.135526213119879
2008036	17	0.0395963494521659	0.161391697398944
2008036	18	0.0362099327951236	0.120116358012987
2008036	19	0.024186824921221	0.0667976223304347
2008036	20	0.0136879447962036	0.0421931345134384
2008036	21	0.0154785833935428	0.0597111503662158
2008036	22	0.0379294186735211	0.158693027661174
2008036	23	0.0382272210918446	0.134034390057933
2008037	0	0.00276471562788953	0.00841929130221227
2008037	1	0.00714093500914739	0.0356842077635601
2008037	2	0.023526747519996	0.204241062539433
2008037	3	0.0520274162005628	0.574238492061599
2008037	4	0.055941668769006	0.603822865648288
2008037	5	0.0409798122132698	0.363853617980588
2008037	6	0.0323017242974754	0.243175403625151
2008037	7	0.0239931427419524	0.173999882297484
2008037	8	0.0261015265890913	0.331465572884471
2008037	9	0.0409019670726383	0.586692458159377
2008037	10	0.0251110065987124	0.401913848982174
2008037	11	0.0142388543969012	0.219541970446129
2008037	12	0.0181059173315936	0.185792762098886
2008037	13	0.00478910978932096	0.0408124746380246
2008037	14	0.196878717940153	2.05067704800042
2008037	15	0.244868901920168	2.2138573682776
2008037	16	0.207779781935598	1.97560685837876
2008037	17	0.274915576920864	2.57688426523183
2008037	18	0.357090676967758	3.02992711208729
2008037	19	0.366463551130722	3.03939767855616
2008037	20	0.289713204339229	2.74924465946181
2008037	21	0.232967136066366	2.61769277409431
2008037	22	0.193741829560753	2.34379371448018
2008037	23	0.170312887999723	1.96303527262865
2008038	0	0.146788119180063	1.68301569357998
2008038	1	0.181918093620958	2.29160080829808
2008038	2	0.211053507272381	3.00104915480734
2008038	3	0.217972028751293	2.86393914538272
2008038	4	0.191982880154321	2.20796897642106
2008038	5	0.164533811544332	2.30067570277348
2008038	6	0.147672762837676	2.16226104492594
2008038	7	0.150867536543741	2.13195464740608
2008038	8	0.169499330849335	2.15548889985202
2008038	9	0.194032231252298	2.04681086995832
2008038	10	0.216419488962692	1.9939167923826
2008038	11	0.214982858930598	1.75179112671286
2008038	12	0.211117343464391	1.5860721817559
2008038	13	0.202328944197977	1.37852180484526
2008038	14	0.189564497216936	1.07774335412181
2008038	15	0.172512650387737	0.763213789218736
2008038	16	0.163969539891568	0.596666407867789
2008038	17	0.163495047320212	0.490156094135015
2008038	18	0.159362840954546	0.408353391741264
2008038	19	0.157256904842352	0.367358964916958
2008038	20	0.15893275198473	0.344256701706351
2008038	21	0.161246351082993	0.318935015908202
2008038	22	0.165941240067069	0.289057124515207
2008038	23	0.165601771646875	0.262825790793036
2008039	0	0.168970881896468	0.284864210932635
2008039	1	0.186590547213158	0.362468292994853
2008039	2	0.206705043319241	0.448429216344899
2008039	3	0.220037196493067	0.514504185215837
2008039	4	0.22781247426447	0.564071442807871
2008039	5	0.228834781527094	0.597224650945734
2008039	6	0.228255707900378	0.634677339934651
2008039	7	0.214747319407663	0.681028466933971
2008039	8	0.241410781030151	0.919938175514573
2008039	9	0.236282766656768	1.02907743148329
2008039	10	0.255144860616168	1.229106490482
2008039	11	0.244219109761113	1.259906126876
2008039	12	0.243428239519144	1.37821361068872
2008039	13	0.245972793964135	1.44195935345316
2008039	14	0.23637862698942	1.41211301541894
2008039	15	0.237447649091795	1.40451516166695
2008039	16	0.230744475728508	1.337917737278
2008039	17	0.226297847865785	1.26939196927973
2008039	18	0.218892280037334	1.18400029859915
2008039	19	0.212980831348768	1.122569508092
2008039	20	0.20621484210329	1.0664606952105
2008039	21	0.198377898593704	1.01877200504533
2008039	22	0.187657708279875	0.988261263681705
2008039	23	0.185781263020965	0.99050831775345
2008040	0	0.180503203303405	0.951314311481475
2008040	1	0.175677259922125	0.899896073777918
2008040	2	0.171473566418052	0.833264679545565
2008040	3	0.167882729822698	0.763396278045986
2008040	4	0.165021392938291	0.703793691744047
2008040	5	0.165258725324694	0.660340510643787
2008040	6	0.166755222297804	0.629915678495414
2008040	7	0.174750516908225	0.614492673937776
2008040	8	0.180310909518606	0.579776157415917
2008040	9	0.173957999173366	0.532452110569744
2008040	10	0.150055037209032	0.486694346576449
2008040	11	0.143796286153591	0.552038060797794
2008040	12	0.129065098731983	0.588575761625543
2008040	13	0.120510521937704	0.583795934763675
2008040	14	0.109420247424089	0.535187126089563
2008040	15	0.0973146622915762	0.473565574947677
2008040	16	0.0865899898739909	0.421428545825749
2008040	17	0.0791520957466365	0.372635630378071
2008040	18	0.0744987660018402	0.328976526556122
2008040	19	0.0714009353580624	0.286751134164321
2008040	20	0.0687199317449172	0.252923488776133
2008040	21	0.0669608963765611	0.226038868606561
2008040	22	0.0641929960401939	0.204698217213334
2008040	23	0.0617096224246089	0.189530010712437
2008041	0	0.0626177216430443	0.184599974284158
2008041	1	0.0623553472453883	0.171685487949434
2008041	2	0.0598117762436456	0.15314514218717
2008041	3	0.0574087716313867	0.139185517473834
2008041	4	0.0557321287637332	0.128465039025267
2008041	5	0.0541402652185165	0.12047532474711
2008041	6	0.0527350602302613	0.113174991924139
2008041	7	0.0515950847253293	0.106950293201144
2008041	8	0.0509090471131029	0.10443466416848
2008041	9	0.0549007628679237	0.130248206185428
2008041	10	0.0606719587081283	0.167060169667201
2008041	11	0.0675927395397338	0.229147225307125
2008041	12	0.0623860853074647	0.229182342090649
2008041	13	0.0614347994842982	0.279077893899446
2008041	14	0.0574139693603042	0.293575457321786
2008041	15	0.0510415411319757	0.276303738202807
2008041	16	0.0458414243475252	0.261362992120604
2008041	17	0.0419568697880768	0.241556774259813
2008041	18	0.0390824404234504	0.215208535962048
2008041	19	0.0376691604273326	0.193359906615984
2008041	20	0.036280455554999	0.175267094444352
2008041	21	0.035778861966994	0.161056100168601
2008041	22	0.0346274446340699	0.150731300034399
2008041	23	0.0340500801844715	0.142906921027167
2008042	0	0.0346316871623921	0.140712890245691
2008042	1	0.0332765074710046	0.13009894940196
2008042	2	0.0318400054663657	0.120531222450433
2008042	3	0.0305784915022665	0.113108206006796
2008042	4	0.0293481719452449	0.107845694613304
2008042	5	0.0284938766832774	0.10398017016615
2008042	6	0.0280815179483239	0.101338189897898
2008042	7	0.027283902248153	0.0956282043102541
2008042	8	0.0261265652966577	0.0894698508448254
2008042	9	0.0269049309997896	0.097565790857702
2008042	10	0.029242147389544	0.117185952592831
2008042	11	0.0303371089560928	0.135060753736754
2008042	12	0.0338781325566627	0.168529571563811
2008042	13	0.0353649007299057	0.186039655402463
2008042	14	0.0352591558341656	0.188968980198698
2008042	15	0.0345446018151484	0.182176698844949
2008042	16	0.0336218031789205	0.170060382591006
2008042	17	0.0325864507245819	0.156304684534438
2008042	18	0.0313478979079896	0.142225455463435
2008042	19	0.0298979509977182	0.127865598990403
2008042	20	0.0282332251351594	0.114048577674224
2008042	21	0.0267312923683024	0.101765234464335
2008042	22	0.0254314466142655	0.0914187530725367
2008042	23	0.0244722319638497	0.0838659141608963
2008043	0	0.0240831346140102	0.0803925767414953
2008043	1	0.0242302518250292	0.0811931810590429
2008043	2	0.0246218829505854	0.0843354680148313
2008043	3	0.0250805640837253	0.0878011524979679
2008043	4	0.0251739515973302	0.0899426996703445
2008043	5	0.0247351852608877	0.0900990408738044
2008043	6	0.0240361015059264	0.0887336662959086
2008043	7	0.0230867262568238	0.0860961279386283
2008043	8	0.0214091221053569	0.0823040769678341
2008043	9	0.0194531609479065	0.0886889151751872
2008043	10	0.0249145963298215	0.145631867226003
2008043	11	0.032073645693394	0.200134418924508
2008043	12	0.0332500328541841	0.209334018071736
2008043	13	0.0376599876431638	0.22740109272858
2008043	14	0.0359757694251103	0.214779920908736
2008043	15	0.0338543408716344	0.205675913166997
2008043	16	0.0324558423137797	0.197198732593772
2008043	17	0.0316438405179025	0.179047739133375
2008043	18	0.0305540845993448	0.160923405542523
2008043	19	0.0303699303668775	0.145461009317004
2008043	20	0.0300894032964519	0.132698772196005
2008043	21	0.0303955710230587	0.121983364519233
2008043	22	0.029762557152995	0.112961406347995
2008043	23	0.0291966544924828	0.105567163030277
2008044	0	0.0292463549907621	0.0995435796521441
2008044	1	0.0287242583378365	0.0948967825279113
2008044	2	0.0281350390470647	0.0905752022403346
2008044	3	0.0273382502861934	0.0859943295888622
2008044	4	0.0264996920050094	0.0819392430042416
2008044	5	0.0252476319578506	0.0782794123255263
2008044	6	0.0246213287599392	0.0748817336922006
2008044	7	0.0236026192870156	0.0716857395357903
2008044	8	0.0217603956500521	0.0683672831961479
2008044	9	0.0248524147849348	0.0932488725673856
2008044	10	0.0286714756128462	0.108918188963554
2008044	11	0.0292270143071628	0.115764104973005
2008044	12	0.0283856552625396	0.111360494418771
2008044	13	0.030366707484387	0.11419789568375
2008044	14	0.0336060816498631	0.134367333112202
2008044	15	0.0360745604504641	0.166472597176268
2008044	16	0.0355024106229332	0.209903551789041
2008044	17	0.0360661597739468	0.26243101168225
2008044	18	0.0352221486731305	0.291820116810966
2008044	19	0.0335597351475392	0.301982189436196
2008044	20	0.0334153422668405	0.30539051040138
2008044	21	0.0314822240994388	0.277546294479135
2008044	22	0.0288115108696023	0.254402214739982
2008044	23	0.029195108092017	0.247126271150469
2008045	0	0.0292392492845539	0.242000945424356
2008045	1	0.0286099915448701	0.235641443245967
2008045	2	0.0300115169601615	0.232060544358822
2008045	3	0.0291714327043643	0.228572029796697
2008045	4	0.0281605821113202	0.222666022376424
2008045	5	0.0251345110951438	0.217258823429027
2008045	6	0.0229698121071392	0.214424696474242
2008045	7	0.0266448879018724	0.282648378626963
2008045	8	0.0278123664835216	0.269775549632136
2008045	9	0.0285569801102174	0.245479901690818
2008045	10	0.0271072521453126	0.214708587529399
2008045	11	0.0246319181534315	0.209489286052875
2008045	12	0.0347857743426858	0.341229779220165
2008045	13	0.0449007428541134	0.378605035293491
2008045	14	0.0521636254661468	0.413539901272665
2008045	15	0.0559542129401306	0.462230482974215
2008045	16	0.0619724913036588	0.400944942988443
2008045	17	0.0653687593195714	0.277925759443594
2008045	18	0.0639955737730302	0.169223187918711
2008045	19	0.0520997761206954	0.103338398928283
2008045	20	0.0588404844225579	0.0893867632416333
2008045	21	0.0749246019650508	0.098766451736252
2008045	22	0.0908727900298146	0.113565937084743
2008045	23	0.0993937126346908	0.122861872407888
2008046	0	0.101475302704994	0.131380912809794
2008046	1	0.0935057618344368	0.122936507545824
2008046	2	0.0783598314275592	0.10746347186028
2008046	3	0.0742525328630731	0.109786038918612
2008046	4	0.076204363193783	0.132569318066795
2008046	5	0.0970543567511363	0.193362832787854
2008046	6	0.116276334954896	0.21312741324879
2008046	7	0.121114317677677	0.187054210097574
2008046	8	0.121925028005963	0.190930289379202
2008046	9	0.161032574684413	0.328921808120307
2008046	10	0.188974455715708	0.521865524121295
2008046	11	0.189085589150324	0.535465288433155
2008046	12	0.174821669165431	0.456739043713268
2008046	13	0.152040614610723	0.372180411235053
2008046	14	0.130984968536176	0.306162259914994
2008046	15	0.11876819267713	0.262146928212878
2008046	16	0.112507297325166	0.219839535276989
2008046	17	0.10675514741476	0.177636592294236
2008046	18	0.0980465518367195	0.142342795728081
2008046	19	0.0919618562257343	0.127546894888239
2008046	20	0.0910043793417113	0.122875008211514
2008046	21	0.106400784570843	0.158594060307819
2008046	22	0.118056196158505	0.209956695763333
2008046	23	0.128457199556493	0.256784712992247
2008047	0	0.139673583823879	0.272291088190066
2008047	1	0.137957847035833	0.257293794833189
2008047	2	0.144724247164203	0.310590909836068
2008047	3	0.159949511059237	0.391087231821623
2008047	4	0.167482840856101	0.417360775081099
2008047	5	0.168619525142223	0.417842016120658
2008047	6	0.167024238388185	0.401097126442381
2008047	7	0.151008724275688	0.35955436683231
2008047	8	0.128308671893284	0.315536826760322
2008047	9	0.109987755479422	0.302817449037513
2008047	10	0.0946219074234401	0.322302485546151
2008047	11	0.090156416535029	0.376985452801348
2008047	12	0.087462367339159	0.377153611533255
2008047	13	0.0851736495504536	0.350671381045856
2008047	14	0.0827024182637182	0.314239394359929
2008047	15	0.0791490861175184	0.269936766166847
2008047	16	0.0758967029279115	0.228099926605788
2008047	17	0.071546102452777	0.187602844292479
2008047	18	0.0671634670003438	0.161965339977442
2008047	19	0.062572188151315	0.144265292216575
2008047	20	0.0593556601604108	0.127152205424078
2008047	21	0.0577123518769978	0.103406723262127
2008047	22	0.0529999924125438	0.0847177663175705
2008047	23	0.0504167565060356	0.0791045215967815
2008048	0	0.0496224079152984	0.0785166384982866
2008048	1	0.0494902780451	0.0774988906020121
2008048	2	0.0489748435148002	0.0741295724387084
2008048	3	0.0481082051327612	0.0705079475043837
2008048	4	0.0476620175567792	0.0682910591210872
2008048	5	0.0471833891873776	0.0663165547843232
2008048	6	0.0480669292915921	0.0674051911710372
2008048	7	0.0486025681738159	0.068811362046085
2008048	8	0.0488185406069805	0.0706860301718977
2008048	9	0.0525544277811797	0.0805882767900207
2008048	10	0.0553771087194734	0.0852925640718313
2008048	11	0.0612899969605236	0.0941785718128858
2008048	12	0.0597337947758844	0.0860851696704809
2008048	13	0.0564706719488059	0.0789155922456979
2008048	14	0.0534637601750118	0.0743251042898741
2008048	15	0.0500338868685662	0.0695085863465246
2008048	16	0.0474514430698685	0.0654934405076533
2008048	17	0.0446661927351244	0.0611634801317073
2008048	18	0.0402456448786257	0.0541777550140553
2008048	19	0.0361948975571445	0.0478899585087421
2008048	20	0.03317654519688	0.0430918166064786
2008048	21	0.0306001234444375	0.0395766743461443
2008048	22	0.0286050947497808	0.0377885199567501
2008048	23	0.0281774704688893	0.0381885251609535
2008049	0	0.0283848977026332	0.0373342370765064
2008049	1	0.0287339591349507	0.0373874240664026
2008049	2	0.0296025863428587	0.0421972372461704
2008049	3	0.0328959958270494	0.0607558798371509
2008049	4	0.0396359119541791	0.0935628989338909
2008049	5	0.0520788240471098	0.141088284821747
2008049	6	0.06404560225119	0.192852957776507
2008049	7	0.0638779076610711	0.233963111979464
2008049	8	0.0882970107695389	0.393264094709111
2008049	9	0.0877386811784071	0.385313507882254
2008049	10	0.0869371509920421	0.402636616970725
2008049	11	0.0855266868618588	0.408498222386334
2008049	12	0.0887553367156574	0.453041024901663
2008049	13	0.090703560653756	0.471974266431902
2008049	14	0.0871659981096126	0.43231925361134
2008049	15	0.0808687676269056	0.390325697033441
2008049	16	0.0756687902239511	0.36521083871335
2008049	17	0.073736536580264	0.360882928869697
2008049	18	0.0722388829455287	0.387567675521092
2008049	19	0.0827155021902029	0.530394370561887
2008049	20	0.0977014397334572	0.758669163684132
2008049	21	0.104301533970062	0.85663899874947
2008049	22	0.100538765424763	0.710421653983779
2008049	23	0.0978794119663998	0.539112225649949
2008050	0	0.0902033556606314	0.420126220965338
2008050	1	0.0861843098933081	0.411650890115573
2008050	2	0.0858926634939868	0.454024691329428
2008050	3	0.0833189601206645	0.437137753362207
2008050	4	0.0791459257758772	0.382654156886653
2008050	5	0.0778564728200732	0.347801926859659
2008050	6	0.0861017006821331	0.379251475711598
2008050	7	0.100101181683444	0.428313840763723
2008050	8	0.103834368622401	0.427040541757984
2008050	9	0.109671826361671	0.521196006337321
2008050	10	0.171523485291575	1.21561750227228
2008050	11	0.181976592657342	1.1723163675445
2008050	12	0.197247024742942	1.06066091528064
2008050	13	0.198586253747793	0.921246719819572
2008050	14	0.194379240753287	0.776166247945468
2008050	15	0.17865038698191	0.680701775208861
2008050	16	0.176326615333075	0.517168121488211
2008050	17	0.14810634181415	0.384123678219791
2008050	18	0.142037510220662	0.422727205951875
2008050	19	0.141767682363254	0.491868888110882
2008050	20	0.14109027762019	0.525783298449916
2008050	21	0.13779075610612	0.516342099678062
2008050	22	0.131474916774627	0.486252836847874
2008050	23	0.119855215566206	0.446048501492083
2008051	0	0.100587053856073	0.389308948283808
2008051	1	0.0787470610506493	0.331648267555529
2008051	2	0.0672433464505736	0.305977466607225
2008051	3	0.0694149318232465	0.317857785745543
2008051	4	0.0737871625806043	0.368818678196063
2008051	5	0.0860519037193865	0.488436618690597
2008051	6	0.10445991380751	0.619316184416693
2008051	7	0.104124666224365	0.677991133870237
2008051	8	0.119198881721534	0.869878272208095
2008051	9	0.102604756024513	0.731336903348257
2008051	10	0.095792354003579	0.646825772049477
2008051	11	0.0946738418608083	0.577242134116124
2008051	12	0.0975363614577599	0.515500458640968
2008051	13	0.0949668398379188	0.450104824274232
2008051	14	0.0894973589624439	0.389078514025745
2008051	15	0.0744395814041649	0.314117182299057
2008051	16	0.0614841933041403	0.255342568747165
2008051	17	0.0485105089062952	0.190835967900453
2008051	18	0.0303575038553207	0.11932726311296
2008051	19	0.0177127215366558	0.0696011910047862
2008051	20	0.013191818862306	0.0535227909339044
2008051	21	0.0120553846583905	0.0508675698117013
2008051	22	0.0150188727653534	0.0622551621520876
2008051	23	0.0187476045521856	0.0799474199692634
2008052	0	0.0176200545115937	0.0790731327689117
2008052	1	0.0164176764439018	0.0763960440736782
2008052	2	0.0164474651380162	0.0765928933918059
2008052	3	0.0166761148162372	0.0736478253745419
2008052	4	0.0166638178533109	0.0636956906699804
2008052	5	0.0146310485103948	0.0490374910946769
2008052	6	0.0120891058839866	0.0364421771564157
2008052	7	0.0106458342859933	0.0321597704489989
2008052	8	0.0168039725357562	0.0772916247536614
2008052	9	0.0295006654367049	0.130647684908734
2008052	10	0.0315497528524691	0.121411711619099
2008052	11	0.0272916535873083	0.0975085946723767
2008052	12	0.0279746689285859	0.0922523641710404
2008052	13	0.0337314918219776	0.108233278692285
2008052	14	0.0320438045851318	0.0901539937925248
2008052	15	0.0267257694845906	0.0632358345711905
2008052	16	0.0253200653984079	0.0563489905071887
2008052	17	0.028651213001693	0.0657695046517143
2008052	18	0.0274521208424576	0.0706176758650206
2008052	19	0.0360844588927578	0.140312207100053
2008052	20	0.0415538725826449	0.16331349884903
2008052	21	0.0379948818244331	0.142326999922571
2008052	22	0.0325893093263172	0.124583906369943
2008052	23	0.0292260993543834	0.143952999766459
2008053	0	0.0324225693596523	0.209605718221239
2008053	1	0.035378875214743	0.238390482144451
2008053	2	0.0357473960273767	0.22557060470435
2008053	3	0.0382692120043785	0.188816355680757
2008053	4	0.0547849968311816	0.221199656560407
2008053	5	0.0717965812147495	0.273907654552985
2008053	6	0.080901791319737	0.306115135426137
2008053	7	0.0836399613061387	0.321742907029961
2008053	8	0.0885564819102244	0.365911365728831
2008053	9	0.0960221533170606	0.470695820312477
2008053	10	0.108684525657014	0.619395449662685
2008053	11	0.11988425726042	0.686998512632153
2008053	12	0.127132622892176	0.65345779370997
2008053	13	0.12699663628376	0.605643497164982
2008053	14	0.125895568353178	0.551556047044444
2008053	15	0.121798080965225	0.542806617976509
2008053	16	0.116846475789362	0.562622347463193
2008053	17	0.109319846499477	0.538093052363695
2008053	18	0.099312792359965	0.487287675266451
2008053	19	0.0797723261917274	0.325790746678215
2008053	20	0.0768978239843053	0.279737978077874
2008053	21	0.0641015501684446	0.201806146470777
2008053	22	0.0444066540415165	0.118921216064773
2008053	23	0.0246765772442403	0.0804834204956929
2008054	0	0.00945752973349695	0.0427807053908329
2008054	1	0.00162781724569488	0.00774611958350309
2008054	2	0.0296407177104063	0.281675525093906
2008054	3	0.18837200494924	1.72485400839122
2008054	4	0.271934790744626	2.25218194730929
2008054	5	0.292805579427846	2.1755963225955
2008054	6	0.283382515693746	1.71321168640138
2008054	7	0.266456267208987	1.43031313700094
2008054	8	0.242101854545405	1.34227043072475
2008054	9	0.247847021573624	1.74221695643956
2008054	10	0.274466082838238	2.3287036469294
2008054	11	0.276791694703469	2.34602480071765
2008054	12	0.267580089059172	2.13391602407658
2008054	13	0.252722512482142	1.81947106297908
2008054	14	0.227533328657037	1.26646253876411
2008054	15	0.197451989191884	0.803963250306816
2008054	16	0.18297010807545	0.574449544023629
2008054	17	0.167447213973569	0.402289429116529
2008054	18	0.152473604709983	0.294029361492299
2008054	19	0.137148203831541	0.218747503447056
2008054	20	0.12411157171958	0.187045072010482
2008054	21	0.0996680727685491	0.144294938829954
2008054	22	0.0598757620396971	0.0847351352949789
2008054	23	0.0389280554214932	0.0600634119286636
2008055	0	0.0354762799547511	0.0559556136663705
2008055	1	0.0353155314196162	0.0571139888512228
2008055	2	0.0423978262245303	0.0731535994121393
2008055	3	0.0470917444560447	0.0809300792420491
2008055	4	0.0484907615053077	0.0845648349259943
2008055	5	0.048902248741929	0.0965545032402985
2008055	6	0.0477874257862462	0.119011155848116
2008055	7	0.0550475082222713	0.282938643164813
2008055	8	0.0597396442266832	0.473371995800926
2008055	9	0.0620381690190357	0.410328426208728
2008055	10	0.0555764691045989	0.278539722315691
2008055	11	0.0477130983708385	0.188761628767762
2008055	12	0.0409138172934689	0.137103899549412
2008055	13	0.0373245894527999	0.106225522142775
2008055	14	0.034832627537518	0.0868444781850914
2008055	15	0.0376775111212774	0.0866974523621589
2008055	16	0.0461154661061905	0.0983800794653305
2008055	17	0.0493053028010359	0.091167272306167
2008055	18	0.0468009994054893	0.075977177373614
2008055	19	0.0428741579431894	0.0673774685648424
2008055	20	0.0354689799465659	0.0667359134842499
2008055	21	0.0378346564643309	0.1199057926042
2008055	22	0.0259498709915996	0.0691063865916968
2008055	23	0.0174746317235913	0.0404842252576053
2008056	0	0.0163866584369728	0.0382446675762788
2008056	1	0.015025637479738	0.0355186648490005
2008056	2	0.0137328810951211	0.0317317374063399
2008056	3	0.0126448744484574	0.029467912694536
2008056	4	0.0109907607411559	0.0275578902523414
2008056	5	0.0102491793797889	0.0277874128382733
2008056	6	0.0105871246259149	0.0319161198795358
2008056	7	0.0120947437462348	0.0399081961155407
2008056	8	0.0150585140552637	0.0566644762617775
2008056	9	0.0116046025552771	0.0450011817608007
2008056	10	0.00626495003722749	0.0197757651189053
2008056	11	0.00529632655597108	0.0137973806077927
2008056	12	0.0066018496513395	0.0201056677280315
2008056	13	0.0122594356378082	0.0445063124407027
2008056	14	0.018469286415706	0.0625241621930032
2008056	15	0.0203964697182536	0.0564613166579755
2008056	16	0.0193944483726146	0.0437485678734823
2008056	17	0.0147129878776051	0.0285366029178902
2008056	18	0.010321425045733	0.0197385796163619
2008056	19	0.00655461288436516	0.0131361239911969
2008056	20	0.00497500508451763	0.0103270051107553
2008056	21	0.00455596327894022	0.00956261402571317
2008056	22	0.00475669552398679	0.0104679577503913
2008056	23	0.00652989113529236	0.016680557666132
2008057	0	0.0142830010909019	0.0581511641655334
2008057	1	0.0259332792416334	0.108902780469589
2008057	2	0.0232321532875467	0.0925352960068506
2008057	3	0.0261866114694422	0.106165846483808
2008057	4	0.0264898871616852	0.0962266235185093
2008057	5	0.0214631205832366	0.0802484582136673
2008057	6	0.0212633785230261	0.0881235432971154
2008057	7	0.0235865801314716	0.0902665925004675
2008057	8	0.0254137661572702	0.0804821195195337
2008057	9	0.0235801618546883	0.0666407941359389
2008057	10	0.0233382422079567	0.0673126660065867
2008057	11	0.0238666433490958	0.0656112845951596
2008057	12	0.0207036984085905	0.0593862604055464
2008057	13	0.0194195342998903	0.0613473617890972
2008057	14	0.0147435467462047	0.0465696786458227
2008057	15	0.00619553993542248	0.0180150289069887
2008057	16	0.00484652450692287	0.0139390369337571
2008057	17	0.0047681282993018	0.0135119748190979
2008057	18	0.00405421686960139	0.00999798467889775
2008057	19	0.00274116977217942	0.00688919438501907
2008057	20	0.00108155003144888	0.00293662270002427
2008057	21	0.00102331689378535	0.00401885971982883
2008057	22	0.0242183091422893	0.119667271015164
2008057	23	0.0377435290995341	0.184271926512115
2008058	0	0.0479330378675356	0.23783991602465
2008058	1	0.0633249478057801	0.280844888022893
2008058	2	0.0697393098963296	0.281290403339056
2008058	3	0.0766080877863778	0.327657776637294
2008058	4	0.0919456876259068	0.445266210211442
2008058	5	0.10976792847127	0.525503412761906
2008058	6	0.13090475489876	0.611248240908656
2008058	7	0.12460260034716	0.671007283014803
2008058	8	0.105560967021389	0.665532726355315
2008058	9	0.112203086588808	0.703267166748443
2008058	10	0.121909489423554	0.850740033607513
2008058	11	0.151942612764414	1.10865696896675
2008058	12	0.165528236983256	1.39902576179909
2008058	13	0.177996183687124	1.54549260355609
2008058	14	0.143929376693528	1.11012521496062
2008058	15	0.182418041749421	1.24366700745597
2008058	16	0.130510755163085	0.756200659032754
2008058	17	0.11716312461414	0.58622596951906
2008058	18	0.10694595744155	0.472716154288485
2008058	19	0.0863896794159195	0.350454799289163
2008058	20	0.0583703126419464	0.233871927159254
2008058	21	0.0549916203635762	0.230414117101266
2008058	22	0.056511644993038	0.241830190190055
2008058	23	0.0481048198259601	0.256279604529339
2008059	0	0.0862618748685919	0.774792734371794
2008059	1	0.161133903843461	1.32562911202058
2008059	2	0.221146638329554	1.7011932746226
2008059	3	0.242412329784782	1.88727871778939
2008059	4	0.260338019738413	1.97928843943103
2008059	5	0.284648584010858	1.83972447321443
2008059	6	0.277666011380929	1.2350583098297
2008059	7	0.23603882959966	0.716983012813486
2008059	8	0.219670663331729	0.625870680294176
2008059	9	0.201361438394509	0.601411497798855
2008059	10	0.204750310638682	0.882436479002532
2008059	11	0.280634974271525	2.29483004169803
2008059	12	0.274749894748101	2.02170493264206
2008059	13	0.253001543745047	1.51584606102483
2008059	14	0.235306286886766	1.13879801425926
2008059	15	0.22205251154266	0.865509813589728
2008059	16	0.200766296605067	0.587446930346906
2008059	17	0.190088461063219	0.391778222962568
2008059	18	0.158764188684846	0.26702992890831
2008059	19	0.150574229615559	0.259615823094845
2008059	20	0.161352743769731	0.299126261605004
2008059	21	0.158532001410441	0.312582679769322
2008059	22	0.160949127812721	0.322089808021286
2008059	23	0.133453055583242	0.244469342277066
2008060	0	0.102737492082498	0.183056299042589
2008060	1	0.0855419798993899	0.160825169684611
2008060	2	0.0819062784965889	0.156611561773548
2008060	3	0.0792438721694525	0.143223070305476
2008060	4	0.0746389204766256	0.133076592738992
2008060	5	0.0734940781089393	0.128633168853987
2008060	6	0.0711778356807176	0.125146392886224
2008060	7	0.0666202066275532	0.124961713600343
2008060	8	0.0671755386055695	0.139660985364492
2008060	9	0.0594742040848893	0.163339981055422
2008060	10	0.0756235506568871	0.357915794179731
2008060	11	0.0790850295041922	0.369022625553511
2008060	12	0.0676118303143473	0.262413549040758
2008060	13	0.0585422463478728	0.182831330280131
2008060	14	0.0514693838980501	0.133054007518337
2008060	15	0.0431172392046013	0.0996460657190475
2008060	16	0.0399930717381772	0.0815196001917274
2008060	17	0.0410744212403753	0.0721705735975545
2008060	18	0.0392541812617731	0.0659247724659216
2008060	19	0.0536975516568644	0.0791480048220704
2008060	20	0.0597769162000314	0.0807979077350376
2008060	21	0.0566454745600291	0.079843132651797
2008060	22	0.0248588201323091	0.0370430283421192
2008060	23	0.016353253924524	0.0311821807660213
