# Supplementary material for: A comparison of sea salt emission parameterizations in northwestern Europe using a chemistry transport model setup
Source: Copernicus journal article supplement (doi:10.5194/acp-16-9905-2016), 2016-08-08
Supplement: Supplementary file 2 [file acp-16-9905-2016-supplement.zip › conc/conc.timeseries.values.win2008.base.Na.moreStations.csv]

doy	hour	DE0001R	DE0002R	DE0003R	DE0007R	DE0009R	DE0044R	DK0003R	DK0005R	DK0008R	DK0031R	FI0009R	FI0017R	NO0001R	NO0056R	PL0002R	PL0003R	PL0004R	SE0014R	NL0011R
2008001	0	1.88221611578272	0.670793383889195	0.545901436148574	0.894842553692023	0.748367260209241	0.61126952096308	0.974068908264724	1.28297985153332	0.899592010741844	1.33621032594798	0.523503121066834	0.258221359542234	0.608256090790152	0.512034495781003	0.465690937851368	0.456570915146418	0.336599604039459	0.461030206104052	0.939495355972904
2008001	1	1.58650486853041	0.794483273583106	0.524964586815074	0.819617328199472	0.803300240935768	0.655788768902476	1.21591562921929	1.30812475461636	0.852953776469712	1.33760116806779	0.475502197102943	0.273528499136181	0.567639019438903	0.447058457170939	0.532785933620084	0.439630771318101	0.343275191151097	0.577452001502535	0.945341962322333
2008001	2	1.32348017900936	0.779612288313861	0.482366887183992	0.725504497811638	0.668936605021913	0.593983624455547	1.32247021206706	1.59244599169241	0.869001242076973	1.42464411409574	0.397856574466469	0.308256845205769	0.513635015942209	0.391626695852131	0.577070414671672	0.396999546034058	0.352965013950624	0.811813163949115	0.949868783203237
2008001	3	1.36891047762069	0.753895260149645	0.447128555278987	0.627521913388918	0.478637244359714	0.544424143462074	1.16859689108372	2.21074116504113	0.97095784016089	1.43547546222535	0.361853518737159	0.361468632921051	0.412080132222601	0.370041071217459	0.573207620225474	0.330727915408933	0.380757722575047	0.851748256599035	0.987677507837609
2008001	4	1.53551221409762	0.731441908650153	0.421624594053198	0.556366157164485	0.431760971342429	0.540891370693379	0.9695074520153	2.62340769940886	0.937470959791662	1.38392792266166	0.366383180161385	0.425640861653445	0.369011657118804	0.349264686969581	0.577258696192113	0.312391154559927	0.365785801878698	0.732789933093739	0.989267474839153
2008001	5	1.50280857619469	0.727294483620081	0.399830567789885	0.521241197250374	0.417335909507367	0.510271377401117	0.802545016633724	2.32985406373338	0.853359345270741	1.26254600163495	0.410527530355178	0.491349769928503	0.382489283430438	0.325571894930889	0.5863468986416	0.300441150063721	0.320460233969898	0.571507484721896	0.998460706448518
2008001	6	1.57938143291172	0.79610074447073	0.38983395406998	0.479928222497208	0.399023808536059	0.500891513178489	0.805967504015093	1.47204581545089	0.801082058660593	1.12991209575349	0.572620293255498	0.488186432493528	0.394063880971938	0.297056169002546	0.590669863768866	0.294065047182062	0.275138386123191	0.491494239133591	1.01758480556917
2008001	7	1.84022394825166	0.870925440869994	0.44459145245936	0.479169623889134	0.376488716792236	0.499660521277013	0.889458469462311	1.2905695413248	0.741137548400528	1.01237444651114	0.663090538920328	0.470078546781364	0.400838177304128	0.265337193158283	0.692940067549966	0.289833897843354	0.268843108574714	0.425621216937317	1.03561551067137
2008001	8	2.06578900891768	0.90385464248674	0.527188559711378	0.418497601941815	0.354329350055715	0.491349400162745	0.89670039518348	1.36256447337638	0.739549877730346	0.991101080377663	0.694478646494319	0.445616025307068	0.36463962514322	0.226312414013783	0.75109744965084	0.291044711620833	0.282299139710018	0.388973145792329	1.04150292434906
2008001	9	2.28330564910077	0.904850857084218	0.607134556777746	0.364311181928119	0.336506642213143	0.547878616967392	0.901395764491993	1.38244433166932	0.726524147858914	1.04924815556689	0.736187325754556	0.47401351890337	0.322458334403235	0.17959727022791	0.67871240572908	0.344694434933825	0.28582554403144	0.339228200761563	1.01232504818123
2008001	10	2.4324490815697	0.9189485594787	0.510687790990729	0.327967813453477	0.321765108017939	0.666204748027176	0.883686158669966	1.28097224157559	0.678273133289374	1.0351161709652	0.835233133458407	0.48670672008503	0.291482326438138	0.150752233856947	0.590911815201169	0.337820810404287	0.283151672971831	0.304810812571672	0.993696108819519
2008001	11	2.00240722956548	1.11923523325447	0.474063256256593	0.304793884741025	0.306529611010689	0.612688939568334	0.81938373499603	1.15922973511055	0.614092062216766	1.00615770509181	0.826747639844218	0.510383604466484	0.253311323815714	0.141090995601754	0.493833906378634	0.330939723003972	0.294849015160036	0.296801974422757	0.983922539300357
2008001	12	1.53372619109184	1.29812942811332	0.383147095616832	0.288813472962761	0.290990097091935	0.581117854079056	0.7373658932178	1.06341206713854	0.540799475162315	0.937643697444275	0.664538095958366	0.535520706363671	0.240659955045075	0.135389957182766	0.353057884821178	0.360353789733546	0.299419640699898	0.286343783087619	0.951165436882212
2008001	13	1.23799804299177	1.22606941305605	0.252015868853868	0.263947153113537	0.272675732514959	0.642190410179443	0.678186067083941	0.934587626270971	0.447498261495193	0.864730723113157	0.529064119622681	0.578263536769654	0.204694800451214	0.120769636932115	0.264605528777301	0.366426810689512	0.303491975124615	0.278889187198698	0.904803816836685
2008001	14	1.0537836868799	1.18077316342261	0.202087394179508	0.252662392558959	0.248891910532523	0.839851985286863	0.63347319101563	0.801122222033718	0.41571983972419	0.830302159654115	0.452185790029067	0.564919950095447	0.174227899448762	0.112632547491245	0.174339345780942	0.353025326576645	0.302957204361627	0.290383917109313	0.862039629759603
2008001	15	0.923730356826457	1.14499021947734	0.165314797554148	0.237869018064408	0.231309851926149	0.830880501765503	0.582006808443017	0.673613757516447	0.416372997914719	0.832943478173149	0.411130237213243	0.524563990355538	0.145240430457823	0.112133708886366	0.130685776617846	0.33866420994706	0.301929952133767	0.304848060051356	0.822903333915477
2008001	16	0.852844475749897	1.11552259169508	0.156848674957183	0.229620017016884	0.288115579318661	0.684987095007912	0.545277841817765	0.567876835333908	0.441897958503949	0.836178706040935	0.369966426877716	0.529024841007833	0.138590501461803	0.113484788571637	0.130110214340867	0.34686162649717	0.296704382995959	0.314441632199308	0.880575289114692
2008001	17	0.838835024468173	1.04329306782244	0.152842931272729	0.225131362005442	0.449340251906073	0.589729881772745	0.514398931400986	0.504725343993309	0.472150068100624	0.815634400162885	0.352188767427634	0.513290316564383	0.15205483624725	0.116924340720998	0.138029880178218	0.365745514765689	0.286029777196212	0.32527613511311	0.892267469693318
2008001	18	0.850995478696524	0.992754383679802	0.14160773525587	0.219832004449846	0.577714973692181	0.546262198573712	0.51329554319403	0.495718461955421	0.51993424023868	0.809805969068955	0.382059118174083	0.471350676421126	0.162408403290961	0.121604984056424	0.129583985936383	0.384409179275796	0.252206956206265	0.316971203091762	0.845764565549167
2008001	19	0.873522462432456	0.936100640895841	0.136146341659702	0.212898881458324	0.576265502974803	0.477980895356737	0.531574836755441	0.539049340058831	0.501759277031966	0.814849171401715	0.448350666052844	0.42513828881929	0.168658067208592	0.124446586781163	0.089262902998897	0.400224804013257	0.244534168117165	0.300099092257997	0.755771854394155
2008001	20	0.893416174955625	0.848110677734353	0.135170034763615	0.204012959873555	0.554389499337625	0.456079308679753	0.508223862228136	0.652632405993343	0.434900990674788	0.865727426489339	0.512406454742761	0.381440880568345	0.175201440347613	0.124071587218257	0.0463099209415903	0.390952073950981	0.257289932672409	0.2875344135534	0.656895941042752
2008001	21	0.904800498958137	0.730445734529173	0.13601885507529	0.200045629793203	0.539045924241743	0.427546486385139	0.626333848718681	0.765047295797458	0.464995439713727	1.20338251798999	0.550305609055912	0.340628532219685	0.181752231368916	0.122558932661428	0.0391794727508206	0.381019316218915	0.267217888729351	0.320516236101287	0.543395475000228
2008001	22	0.907240738666352	0.623525957970602	0.138715645940313	0.200416603851129	0.518024872835915	0.398450446081055	0.678830498961785	0.812560687345528	0.539451352509042	1.22926586465638	0.563239133545691	0.288469063496981	0.198538349358664	0.12022682758449	0.0421099084582129	0.36889168854532	0.280639657725117	0.382656967033521	0.510663287803796
2008001	23	0.896392344809293	0.550854057160267	0.144025602422169	0.203695242848537	0.486330886131832	0.368400445291118	0.589104136764088	0.786587253632832	0.590465333446871	1.17097624144714	0.543185563812838	0.236869495990243	0.224635060218596	0.121939181148518	0.0397602453044918	0.357975538020173	0.309380108469698	0.474344221403364	0.660674159299797
2008002	0	0.864962458407432	0.500705914688604	0.153813901662141	0.208465294702572	0.56496594652448	0.342935441339941	0.542638265955508	0.707993057622952	0.481842114701083	1.07224930521493	0.517651353099542	0.198075444327511	0.21894767645761	0.121867222840228	0.0341040148409391	0.350053405739325	0.398680548536101	0.373314244206659	0.759232171904636
2008002	1	0.81984835822401	0.458235953199354	0.169543819772459	0.216999017390018	0.583729977455607	0.316752539043957	0.553841792528669	0.599630130954647	0.3851578125006	0.81037904979809	0.507007319666899	0.18196064800417	0.261238288110254	0.123381292862537	0.0211113759647005	0.340895993451963	0.566204223234607	0.347849110639386	0.780591093076609
2008002	2	0.804911137187664	0.429227675910142	0.1899372306494	0.228753530148788	0.543718105938659	0.290519370609788	0.611439021191628	0.429730807801828	0.378064519135543	0.64992765711839	0.478352367628243	0.177097966832919	0.201074169150972	0.122184487771363	0.0107974374813484	0.324074378579124	0.643178199678973	0.380779770693645	0.750908306415127
2008002	3	0.850975163265031	0.406573938593902	0.212169723151589	0.262338974920709	0.481458135012637	0.263640818820774	0.642145107474337	0.311099890437824	0.42599837186771	0.625608378933189	0.448720909444264	0.158414884097046	0.204486051122202	0.116852393780283	0.00486516925734298	0.303203465878423	0.611976942574971	0.383644350954518	0.730600790486935
2008002	4	0.900214210945115	0.381960585839746	0.233205539712786	0.331366131236629	0.444710384601111	0.233454641539717	0.642527981292492	0.298315128712588	0.338127198962609	0.671126404682163	0.445040326350737	0.150875485061014	0.420907367309676	0.111672992867303	0.00390883659355657	0.282554281238203	0.424135133148367	0.362830739938046	0.75019179040818
2008002	5	0.927201350761998	0.354027610081231	0.250423656111039	0.355177559260227	0.442877752371542	0.211145807990445	0.624505941866611	0.475957647682352	0.402452668506745	0.75023291831764	0.428886593906827	0.138492373817524	0.819540313854186	0.106438596379783	0.00378974898614555	0.272753461620357	0.248908569492164	0.364197413334745	0.714206557002782
2008002	6	0.937765433350057	0.34283097318323	0.265376513702339	0.386197288472397	0.453599812434889	0.201728075988742	0.600532142057718	0.633877639458645	0.46255102619512	0.906415288889536	0.398271435882601	0.11979250817415	0.856511873989327	0.102539266712295	0.00485233484687894	0.263743236630054	0.17955419554757	0.368487459381281	0.68618174292653
2008002	7	0.925088605831957	0.41223774246616	0.278129849832575	0.365330633448302	0.429542575198464	0.199063361524478	0.622591582023797	0.581353495645784	0.439511710027423	0.793764352547912	0.389111614086225	0.106315503359858	0.505010907997909	0.100545153340102	0.00549888268017245	0.221073255467715	0.158731531993789	0.365554758832217	0.717664219369812
2008002	8	0.874736839406315	0.406551172868947	0.292044429097923	0.286421553405732	0.403729334202178	0.199879529738797	0.696546963168769	0.529831534337523	0.707594820735453	0.854113757569068	0.361878288496297	0.101312457121339	0.175370192433823	0.0998384758172086	0.00642994661604721	0.155333703411673	0.155138647328144	0.382015393772508	0.757950845939654
2008002	9	0.811858555470902	0.344082455191991	0.415607956089483	0.248297391096332	0.440265465508264	0.208881983204434	0.693661161929881	0.544443165400203	0.712036888015586	0.876573373354309	0.356397980831011	0.0998689639916426	0.270443080235802	0.0980948501195145	0.00769143329216694	0.131109296404026	0.187782660893932	0.380924584530188	0.782916433955695
2008002	10	0.673820346301343	0.269861012792094	0.570643275005418	0.258607809990782	0.506780933339988	0.230922171361469	0.563206379852577	0.581391493143375	0.783509602899549	0.934648195924562	0.354161284807423	0.100428086980119	0.62999635675398	0.0921376550437266	0.0081036964778218	0.150675199913185	0.197517935228923	0.431731714808194	0.845022319838893
2008002	11	0.604038492016304	0.232223075630428	0.602034550687514	0.256043528990392	0.623602701790114	0.248405175703278	0.469929933595193	0.571527120983046	0.741241182611291	0.963444889176794	0.355044826026316	0.103629373444677	0.852950833710994	0.0632942536168081	0.0138661931625166	0.136954932194935	0.177647788852207	0.414199286328901	0.871633886110654
2008002	12	0.742870267326874	0.210296593825905	0.565282760945188	0.188822257877561	0.637189467186311	0.266064047126835	0.469089413495581	0.543013746925864	0.633633757404007	0.707117552408156	0.35726818373548	0.103171026439756	0.83629676477733	0.049583488876399	0.00833803102104312	0.0688962071443499	0.147326420529975	0.328859373267537	0.886330369197524
2008002	13	0.719468185811289	0.235168655840279	0.521498838639266	0.141078441268904	0.556979681331593	0.255555774287021	0.555580482411932	0.58328490433649	0.588063494598791	0.474837986600015	0.362528937811932	0.102736748433684	0.816038196324995	0.0496372423415615	0.00440881638336555	0.0466795618048284	0.120944422802467	0.267827043263724	0.834834960351656
2008002	14	0.741710547106661	0.240530244711905	0.477106646219864	0.0981884771545179	0.412386349275444	0.225410135995205	0.729013447846572	0.661554073891013	0.532698536770394	0.491717407398237	0.354900277335112	0.106539784257098	0.758076618812422	0.0520011071490634	0.00231769406285072	0.0324079899002243	0.0957285530612955	0.292725498490073	0.779870182933723
2008002	15	0.764453699071209	0.233043935100084	0.436617546431184	0.0377398319209627	0.271590637196725	0.132236794734581	0.828621601892089	0.736796317723145	0.538114809112123	0.849724729880212	0.373453159846835	0.103929987433239	0.774127660423418	0.0540930450488896	0.000986715535120233	0.0223435559639309	0.0836369092198619	0.26280090526438	0.686847538039462
2008002	16	0.754366129514606	0.231088736186671	0.403958391273023	0.0293617344237538	0.268830606545731	0.0371883578684644	0.812432076769529	0.828566217457394	0.48069466821807	1.05272369120821	0.401450332968899	0.101287439276284	0.830579714301596	0.0427981454901946	0.000386974748312245	0.0165221930231374	0.0801706766222083	0.191487532822637	0.573786381510061
2008002	17	0.763134130569588	0.208326663134614	0.356088755432514	0.0269692040676713	0.303257644996634	0.0225805585827684	0.775615943684782	0.619088800689002	0.48635719137047	0.841926110956742	0.414753914035654	0.10420514379204	0.834821254340218	0.0372553657149733	0.000120505156307062	0.013720224181524	0.0742067469074585	0.163984590326602	0.507992813624607
2008002	18	0.824345953307116	0.126390120822174	0.32583159706311	0.0237503588075205	0.378325459155022	0.027794252247365	0.717671710889662	0.488683911420236	0.507998332824292	0.725366302118059	0.427190556897919	0.102979970201584	0.836416223072835	0.0357703513291267	1.94358089994748e-05	0.0114464810848975	0.0782229568767432	0.160869292133276	0.44149923726304
2008002	19	0.912248703326327	0.0860587611011877	0.326630081944983	0.0233527907941549	0.404572522607767	0.0325439111585238	0.675333105738789	0.503986002258299	0.512115672574308	0.671779929940282	0.468901229880251	0.0738833645926906	0.940961363295162	0.0332259044973576	2.77982180405408e-06	0.00943627024914557	0.086492643459086	0.154931662426752	0.370696173189413
2008002	20	0.971320717053168	0.0325110994549691	0.308357047763151	0.0293978950243925	0.340718058264335	0.0246788537269566	0.671053987269253	0.56670192015508	0.510738816311797	0.618587776354838	0.501375225030057	0.0564967172970186	0.840035198739494	0.0321345324833425	7.90626391033326e-07	0.00823230591649557	0.0836122922834947	0.147076600339143	0.291373093598476
2008002	21	0.870767269444798	0.0169283616636834	0.301578609867233	0.0331915947231521	0.292437456010429	0.0178375837996666	0.699782095367616	0.619003605588977	0.525127068312472	0.580683850247058	0.52426059461683	0.0575182543820336	0.781529765794028	0.0314169657848288	2.84591157035891e-07	0.00809395257400625	0.0745379396876353	0.135618142373783	0.254421497284242
2008002	22	0.769189605648361	0.0139613152701931	0.310892080893363	0.0200507876201176	0.275287192929201	0.0147558140556458	0.73585409086779	0.589047153301064	0.530806462104141	0.588617057005431	0.530775911487765	0.0614915437849199	0.792851289615916	0.0293753027894998	1.08436236581288e-07	0.00781620001449702	0.0766408539256663	0.133438954699408	0.25825461742469
2008002	23	0.734846386124951	0.010640617408331	0.321470040795813	0.0066453242021401	0.252713833736951	0.0136636784233519	0.759032133384432	0.525479907018419	0.561158109239406	0.635720058828505	0.526061347053506	0.0554626962951323	0.819718599590061	0.0263585999684302	9.15405388006409e-08	0.00754769408948688	0.0809225419874004	0.138167694922297	0.25667491871564
2008003	0	0.733265728492907	0.00739820909529303	0.312668041744299	0.00659060353956871	0.244059600040275	0.0134793303727275	0.760649460344885	0.484002517339689	0.570973005472389	0.667300746575704	0.513026456363248	0.0408821188283616	0.843063951349511	0.0220485336133888	9.31188687395487e-07	0.00721700529672153	0.0812363277476201	0.133666575318889	0.219103248583822
2008003	1	0.776456423858264	0.00616207976645522	0.300256334703624	0.00944814307661195	0.231335390889636	0.0133161975404002	0.826610824671887	0.458843404797216	0.556283220023559	0.670716191669706	0.50374532189302	0.0391662878158931	0.87168491815601	0.0187741166783625	4.87944485125236e-05	0.00675410077992365	0.078991386122502	0.133617228545005	0.178797640374283
2008003	2	0.849879035523208	0.0065350601999937	0.292939574988233	0.00669653543537758	0.228156861379113	0.00986998401209717	0.779687893713715	0.456391372911559	0.578851051351751	0.668874861767805	0.505881248171238	0.0433707629390383	0.897470838579378	0.0170741606835484	0.000323477140991395	0.00608254741513435	0.0753042367718573	0.140548097031078	0.186356976011959
2008003	3	0.869169790009624	0.00749442091832885	0.291138058826341	0.00391266164369444	0.22317518161768	0.00776485607822383	0.755441499317418	0.465546451530324	0.645699990657461	0.667627089182956	0.509648855548124	0.0490595264289949	0.896508000835186	0.0167756586149893	0.000301817486816571	0.00509706988065575	0.0713524690583927	0.146678102878142	0.303865015171466
2008003	4	0.868622607973007	0.00740195591990238	0.293094737291654	0.00244937715001837	0.223986322928167	0.0104002743760727	0.731058242262612	0.444946176406331	0.728717808847239	0.652509831405336	0.513888896417125	0.0593743035993469	0.881811800639825	0.0176928671398711	0.00022458644185036	0.00429051683143459	0.0658598285409708	0.150472947179442	0.333414728439805
2008003	5	0.839211399273931	0.00580242675059028	0.303720949165505	0.00157949249426472	0.230581110096605	0.0234577483672243	0.763555918951171	0.442296426861669	0.793357663982432	0.624426140450427	0.536635986363523	0.0740941503546753	0.876418569452324	0.0188414658368908	0.000318608845653688	0.00391242567572385	0.0602652812873435	0.158419397801953	0.260963110182056
2008003	6	0.868555170833492	0.00488490960429985	0.283237355161951	0.000809948447348042	0.237183783430163	0.0304836482762064	0.811258660488767	0.446767970250485	0.845222432243194	0.636174325322724	0.556955020028437	0.0967790240733483	0.870663939625026	0.0193885175926541	0.000493401345371859	0.00446826560853851	0.0571137350929415	0.178552119583257	0.209804387299772
2008003	7	0.947885873149338	0.00554948811321825	0.258900729095828	0.000378892470889512	0.239359751185438	0.0321754839840719	0.847025757368204	0.466351486769858	0.855513601819872	0.657583546570518	0.582067392023208	0.107983000806433	0.893894089919917	0.0195561475965038	0.00148024381750204	0.00859755751484442	0.0534998945062204	0.200264697532362	0.197431390513528
2008003	8	0.960636598458149	0.00751907020045903	0.263197238670391	0.000202550206149606	0.247192467904742	0.0441051968445095	0.966515740992743	0.479344600186546	0.874323780241586	0.66896757087136	0.577230527770785	0.103440419161315	0.932030690312384	0.0214385857220777	0.00597491176569727	0.0198905418410304	0.0538714949864286	0.209357846127394	0.221846687439926
2008003	9	0.938159796612407	0.0210548999999254	0.28873685238215	0.000370945487512934	0.252780606607023	0.0678509909341034	0.99688809954168	0.480686743757776	0.914542916480536	0.723646379397008	0.582514150403738	0.107949162633448	0.991142736502015	0.0248055964279345	0.00409869845791899	0.101592239194619	0.0591452027569402	0.221564479521278	0.257400074706572
2008003	10	0.9669934399002	0.0298303183782261	0.29684341074584	0.00151836783773421	0.253520189591161	0.0861683523953262	0.972904443345545	0.479205025584374	0.982366580934666	0.763692514097697	0.573977872224892	0.102640694348018	1.08647056357984	0.0291739268271691	0.001152101518649	0.171955345675915	0.0631000622005224	0.248893532153302	0.283210178727866
2008003	11	1.00316497551514	0.0274561737492449	0.274698248188775	0.00612952136028017	0.257381506262147	0.087006082972204	0.935482617401347	0.472235856484096	1.10371551559916	0.704228396556651	0.54811754310204	0.0959407628221151	1.12992155327989	0.0367919472074298	0.000768358232003375	0.114215963332884	0.0704954552039685	0.273065586453465	0.211156515723987
2008003	12	1.00335587904855	0.0352013986458354	0.243736509821811	0.0134302152370105	0.254322995626084	0.0841537106158631	0.927550773175878	0.465430002881583	1.24285111529004	0.674095363188724	0.537049546493507	0.0915260602459692	1.16645157025431	0.0450659720240606	0.000913205611112416	0.0893136499074867	0.0744048832331083	0.278109645651998	0.15753454374199
2008003	13	1.00535348099175	0.0397982182277639	0.225720048257915	0.0205321529421551	0.25312651141839	0.0757705229704084	0.941815799877673	0.489285296707451	1.40331815056247	0.670062297348439	0.53250589602195	0.0953436075117787	1.20273269333728	0.0534051743991233	0.0052779910899852	0.0806184853056157	0.0877544136462593	0.292638181899974	0.131496185727732
2008003	14	0.990044089633022	0.0289101646602007	0.213433480058221	0.0318558701456206	0.255432291704499	0.0733255695080011	0.940324566572576	0.525686604068356	1.40182822093864	0.701854028168758	0.529639438469773	0.0964882318069643	1.21679810225223	0.0600917436044396	0.00834033619129027	0.0970444163738303	0.0814319218276903	0.308925395360321	0.107800993235095
2008003	15	0.997979271883934	0.0220561357098503	0.198762702037087	0.0352026831904112	0.269178327581924	0.0750629296005284	0.98072646193555	0.560165762014296	1.36980567287889	0.716774379506601	0.54988400584524	0.100641440768189	1.20422643972427	0.0622515459530917	0.00374837908890018	0.0963076569317234	0.0694379622836146	0.304300203302345	0.10171158804131
2008003	16	1.08446203338544	0.0202472050578125	0.182646226140973	0.0648835914429004	0.301788863355411	0.0753938048760974	1.01372741541825	0.606890442225937	1.39247048369796	0.748392575725388	0.586772377161876	0.104293677021436	1.17934263045759	0.0597233099014357	0.000244857896750005	0.0650979774668898	0.0761742104104806	0.326585619141438	0.10509155078423
2008003	17	1.18189233765243	0.0230381737995353	0.168759498743256	0.0502205913425354	0.326287784315186	0.079066254777164	1.07409129140206	0.677598761789339	1.43039113170997	0.804027512781407	0.589778593651305	0.102043272770177	1.15302158902441	0.0562119355093269	2.11297025617101e-05	0.0338963158759474	0.0816085217704268	0.331169853102166	0.114427241172278
2008003	18	1.21181255500026	0.0288778332145964	0.157348034002487	0.0325775970822197	0.350099570056302	0.0867071613832871	0.939668584921779	0.710384372506163	1.52255157929187	0.84187884241036	0.581042016763603	0.102498748140732	1.18962412785952	0.0571291270644539	2.0724838806439e-05	0.0266657336857953	0.0878424928519831	0.343913908710572	0.117686702917974
2008003	19	1.13359385399833	0.0344003080753474	0.148237943933223	0.0292945462862265	0.35571050048428	0.0958010308323288	0.890690845901813	0.695030472510552	1.63565489025622	0.774341010926729	0.572284600730295	0.0975848979025764	1.25319622939216	0.0591890522660086	7.11166697535953e-06	0.0278284491617912	0.0904520398966097	0.354520442134907	0.11937781079377
2008003	20	1.0884953156247	0.0550307715540116	0.141876752893605	0.0337435389687513	0.361805961338461	0.0959077374808463	1.06731866606222	0.673438341500241	1.84089821376389	0.705214326569173	0.56974479747038	0.100649904680733	1.35498130146036	0.0625832276467561	7.43971577050336e-06	0.0439856894174175	0.0869696026083374	0.383730227875404	0.13688775745142
2008003	21	0.977467225915824	0.0671566670865977	0.140659339592247	0.0347832178342485	0.306191422788451	0.0925203316109323	1.10845338313567	0.643467845730654	1.94321950840036	0.774705649067243	0.558819667281409	0.10993589132876	1.43523600950681	0.0668144949968112	8.18638286105288e-06	0.092239734899177	0.0806184773599884	0.437094025179851	0.186510123688348
2008003	22	0.89309588823166	0.0686927577633175	0.144046866620365	0.0340128954648584	0.271844062146826	0.0905942191655282	1.01761749268103	0.610000392327962	2.04919279530505	0.801690734113523	0.559468263240913	0.101772922779976	1.5259187947292	0.0689877904586778	9.27338795165362e-06	0.0993062752409213	0.0763599164368514	0.451610425128773	0.211363579720375
2008003	23	0.910988250244919	0.0691280747696184	0.14942418215695	0.031616843555407	0.261315664886825	0.0887237816729292	1.04049388763702	0.543252876252045	2.01356032776198	0.735618905793334	0.558211634882991	0.0980133979547023	1.52963676903807	0.0679067564568916	1.36326191473833e-05	0.106175867343525	0.074539996102622	0.486861634622308	0.218537179305536
2008004	0	0.866025046825421	0.0646508008058851	0.154612697583855	0.028450642895268	0.255558606896748	0.0876784453349001	1.01645629665879	0.529160162111539	1.98134370790727	0.707015892977036	0.549376277321332	0.101424934308179	1.55442338160036	0.0695173462284434	8.46839966325139e-06	0.104638665616254	0.0702917224055313	0.485232847246326	0.218358632289539
2008004	1	0.818028116846265	0.0588838400342831	0.156321859795292	0.0274247086377852	0.259734215869364	0.0870925892451673	0.995210600755151	0.541728184068198	2.05473784359025	0.665512360546219	0.540297300052136	0.105115487583439	1.55454324093226	0.0713072659818345	6.84575157070801e-06	0.100697992108036	0.0630811462409454	0.494880274582203	0.213137588858831
2008004	2	0.765547394310706	0.0500280182149572	0.156313085371922	0.0285648555215171	0.265964720710818	0.0899033383332766	0.994011588291138	0.5566668593245	2.15345382663527	0.624784453010032	0.544830004974824	0.107282051969108	1.61982688919992	0.0697733740333954	1.00358001697474e-05	0.0825794813798201	0.0599271577435986	0.532362332440758	0.208001624564843
2008004	3	0.761053616849961	0.0486876572338443	0.154585161158447	0.0301453517144658	0.27272030352949	0.0939187509572605	1.03335509862226	0.577604478805923	2.26281206856543	0.610666081603309	0.537540792088988	0.105793319412487	1.69246821306177	0.0676565820353149	7.52405556796008e-06	0.0772788932394483	0.0569511657868799	0.547186694508717	0.208976804590873
2008004	4	0.760080324986034	0.0518669507607095	0.151374533361328	0.0327549419569624	0.269663332346718	0.0957389992777826	1.09459112396195	0.612945539227413	2.2129066078571	0.641135443228664	0.528515172442383	0.105518087191711	1.86080552263003	0.0664239158244722	2.70416921940813e-06	0.0720285560045639	0.0557575798162253	0.520350228540486	0.241176356243856
2008004	5	0.763837995093118	0.0558626243794041	0.148234764677781	0.033503975890489	0.252180865626296	0.0915712719611244	1.1874440849192	0.617134702836644	2.07565909466445	0.681353537936411	0.563262105735235	0.104493750782175	2.00709712034414	0.0654562131080044	4.67334413852245e-06	0.0716301905361399	0.0544652662071257	0.495259306853455	0.282205437792276
2008004	6	0.744739864615748	0.0576481390279943	0.146957378636883	0.0337273479935144	0.232473449925273	0.0785566056450719	1.19801128144011	0.612179414778651	2.06672604414571	0.669944930141246	0.591689243274121	0.103096393263099	2.12425749413415	0.0645045193219286	9.33662037480254e-06	0.0722357382913303	0.0574306789314799	0.473627613082025	0.288424453515593
2008004	7	0.740382443186222	0.0596057942823781	0.146698138878126	0.0348222241706047	0.230559964716189	0.0701494597851344	1.18063080770722	0.641530663365808	2.09977658358784	0.640218154904463	0.599932285490917	0.100354404370163	2.24236668415248	0.0613614445286717	1.45901361165934e-05	0.073853902455424	0.066161763539033	0.468386928546227	0.273302855366496
2008004	8	0.757469790851343	0.0598436290919969	0.147399365776405	0.0380623126449611	0.234234344565218	0.067744667734112	1.18566001473893	0.639013325483512	2.21174732458776	0.637504287703967	0.586580190794675	0.09492882811514	2.36684862770901	0.0574782398180482	0.000136508387910915	0.0911729872042226	0.0709127575813825	0.458145230035173	0.24863729965818
2008004	9	0.760814534570547	0.0631863538796635	0.163280853600872	0.0409984841269632	0.261096909299936	0.0944126579554317	1.16295947914678	0.649295212084301	2.27464905520562	0.626046888765183	0.556938344198978	0.0901842359529376	2.48454832373094	0.0545550452110484	0.000169309190650643	0.116705512061485	0.0702173375341181	0.458912560190309	0.237656066311694
2008004	10	0.779763006522277	0.0667279086758716	0.174495372048549	0.0433277436328401	0.301819623236055	0.0943281876896649	1.15280186980711	0.633685168525372	2.29120246775555	0.593602169209922	0.536507131530739	0.085735424252797	2.54255999959548	0.0550553026354486	6.03881412508118e-05	0.130975756062669	0.0675501180759034	0.449309974960976	0.241978676985381
2008004	11	0.803848754280708	0.0652541597204603	0.19792184846927	0.0410788768828014	0.318838333106971	0.0915904946845028	1.16405386855731	0.617177855469807	2.30174641030225	0.581887779077045	0.540015373510264	0.0833809915542738	2.47898527648053	0.0544154936115703	4.72437490442828e-05	0.122853667688149	0.058374754246492	0.465706957973236	0.270794268546641
2008004	12	0.850539276674077	0.0603420919567046	0.183716361180217	0.0379666614049563	0.295196669772971	0.0880718768010338	1.14511879100424	0.595359097365539	2.26736254379753	0.575123868951373	0.551575172142621	0.083272952627137	2.53550098827651	0.0536971073125563	3.86703337075758e-05	0.118302899845811	0.0557138789051997	0.482271471991682	0.307643503777039
2008004	13	0.895353518750231	0.0551724911276316	0.163743598064814	0.0345700793840274	0.271034193480697	0.0801340642417284	1.11666502423138	0.592259113259558	2.21117348265505	0.568734666275832	0.553725403110314	0.0824945619505351	2.65064380439841	0.0550900537721705	0.000131291370787249	0.112130070423764	0.0566998835848839	0.490539154054739	0.307520930818591
2008004	14	0.914859839864748	0.0506582259466922	0.1406729080607	0.0365538092394836	0.263990139554849	0.0784071821482766	1.14565719524848	0.600455482363565	2.186299321231	0.576789306978754	0.563814504224215	0.0796093089644858	2.70900537307352	0.0538985291253643	0.000149187363252391	0.118006824045561	0.0635073611109944	0.513415868189877	0.277892406920252
2008004	15	0.934549300691981	0.046682222335488	0.119175810645421	0.0404646018438547	0.285948869221158	0.0736508410938417	1.16076475073809	0.628091745151234	2.14573726533081	0.582824082400404	0.57329119110721	0.0799958034130326	2.7484549374034	0.0552316081557643	5.87428624216493e-05	0.112421617873326	0.0752690419125271	0.521508817461541	0.278396388786083
2008004	16	0.952665821484966	0.0418001133747485	0.102832664163548	0.0421980433696885	0.30048829886677	0.0609974611460036	1.13925259378931	0.646757757992508	2.19470469616235	0.579436831644903	0.588655420059211	0.0821264490397116	2.77933024054825	0.0574828895292422	7.77603903865686e-05	0.0878241739568951	0.0866276592410039	0.548123714419409	0.30003614760907
2008004	17	1.00975990611185	0.038105177247263	0.0930477448153487	0.0417112052096532	0.298854562766602	0.050254636488227	1.13213247611514	0.635190829554338	2.14908555043092	0.557854867116858	0.627815866650538	0.0836456660686283	2.75831963446717	0.0611795150365816	0.000102418255635171	0.089997660852448	0.0823327488782273	0.563704014367905	0.28265829868157
2008004	18	1.01946813211329	0.0357211010477196	0.0869832629812373	0.0417770855978261	0.275694775389862	0.0484306806503857	1.11762904324682	0.622815544511991	2.13384574853933	0.545246494492093	0.666196184707603	0.0780383296138697	2.7754553648354	0.0665691831577692	7.56281985115168e-05	0.0952948813902473	0.0884399825070077	0.600592619004645	0.258290867881668
2008004	19	1.02450856354814	0.0353112827612206	0.0864501034650411	0.04387126337484	0.224914839311239	0.0469944441401318	1.00032462827617	0.602446519621482	2.20427831612727	0.541069092018709	0.673413639440988	0.0689278584964153	2.95480364823556	0.0755845314604665	0.000172246942541051	0.102530978803703	0.112879661256887	0.63033574626531	0.176329063747277
2008004	20	1.11494071756221	0.0367606016692973	0.0854316681931901	0.0513030606440796	0.205639452240413	0.0427925753066605	0.939968853723493	0.600591988212892	2.2579023635799	0.536937404533809	0.685076244252822	0.0714512935004426	3.13329283116951	0.0870868225898752	0.000285584096261749	0.111755680032001	0.138200952221417	0.682098925178048	0.0986218593234605
2008004	21	1.19788955871043	0.0335447934789738	0.0795970801576885	0.0580444485550414	0.196920312907548	0.0386281830870883	0.899619872331746	0.587880228995003	2.20299998186937	0.52473836983911	0.703577816384787	0.0772307008504237	3.15107488575357	0.0950745477727899	0.000411048331308781	0.0932529587031065	0.13959620147154	0.706023694237798	0.076277624941394
2008004	22	1.27691757215406	0.0328949259413059	0.0719559880546665	0.0602627057815304	0.18818137820235	0.0378696459537271	0.854615199367946	0.601038373332934	2.12936661211073	0.514650300581368	0.712872703340857	0.0748106683757645	3.1869621502979	0.0966400278174376	0.000609953954294626	0.0915412679476484	0.120013679503571	0.71943646657843	0.0540373483755494
2008004	23	1.29228401528804	0.0419297527538528	0.0674927410126168	0.0500728485028094	0.190539295453969	0.0404401009230037	0.816849756587602	0.597874985927247	2.08932454909042	0.496916343075974	0.74929997183534	0.0704809820038357	3.25559870916047	0.0958127101928061	0.000838161579823618	0.0967533871532026	0.119476950109182	0.705191094610542	0.0461940191946602
2008005	0	1.37695495158676	0.0604590533129311	0.0653936459662631	0.0466022197194415	0.193299126646338	0.0440678202683674	0.793356666668392	0.61166779678699	2.06161292803933	0.479564831271488	0.764589129312371	0.0704125390456979	3.2979586075938	0.0981540571646702	0.00167836908419405	0.108853916272114	0.126040718187325	0.720173811529912	0.0761009673677012
2008005	1	1.557514572628	0.0840107736306489	0.0641342528104893	0.0499942643551039	0.204947323906428	0.0499251073811871	0.813475271549885	0.697324680553329	2.04888398927414	0.462817676884896	0.755696363824211	0.0686840473324584	3.31098889748465	0.10464236284386	0.00299788087469567	0.12571007164863	0.14108195217818	0.698812933969053	0.0802392750340982
2008005	2	1.81847044325071	0.114283242999169	0.0623237387841658	0.0726895311145355	0.23228233338308	0.1028440405817	0.860069560828365	0.720697983308239	2.14879631184671	0.450344498004483	0.734575089704548	0.0715446730744676	3.32340435283794	0.113930530091379	0.00446542147169946	0.133444116438044	0.15064707084986	0.684504304252604	0.0498053903767118
2008005	3	2.07374960665519	0.125278488323943	0.0602259734858966	0.0849143804998473	0.243502477499833	0.140842122900552	0.853619515879004	0.726266857737637	2.20530761358656	0.463896351327179	0.735164268320279	0.0794184405430701	3.4025340460393	0.123791878689534	0.00597170605696278	0.134565804906325	0.19729889231541	0.690036592559312	0.0314952861897678
2008005	4	2.49890360730542	0.15234716131739	0.0628276512440985	0.0878934716747042	0.242922174965362	0.146872431917411	0.793644032456319	0.715786841990869	2.22149722905965	0.463674632426925	0.737879712590846	0.0854742940692251	3.47553516660389	0.129585582815977	0.00815517183320336	0.131920584691233	0.274956810283545	0.706131258247243	0.0195813624125832
2008005	5	2.73882683526645	0.228622786308119	0.0655286643419687	0.0745679810339793	0.239328209784233	0.134469858825187	0.792490377074718	0.720985643380256	2.24526415394255	0.441001293091831	0.711777807337189	0.0884798192313505	3.56992263867842	0.127634791994289	0.0121226610794242	0.13967827556539	0.318772357219698	0.739944232557422	0.00907060149046747
2008005	6	2.70887086818751	0.309894267283362	0.0670030829270054	0.0653333084183989	0.237458730414456	0.12429001199242	0.82177671439108	0.757908674377441	2.23113666842269	0.417735593291254	0.74046316798524	0.0920464897244887	3.56287589831434	0.125804126866918	0.0162164582463282	0.135056909759009	0.34805511559701	0.768000829280783	0.00491155507616366
2008005	7	2.48494269114289	0.335052540287704	0.0724854436728278	0.0685876115908099	0.247698858331149	0.115318517442808	0.8805989419073	0.812792023753264	2.39082168444214	0.394415240485277	0.781871942377843	0.106433406690726	3.60409390001411	0.125369681301915	0.0188359232635038	0.120147560027179	0.346024789153174	0.825680828657032	0.00885656099790832
2008005	8	2.45318565956158	0.321681560950032	0.074535643752199	0.0686194234376054	0.244946734843828	0.119249887285386	0.930352947668332	0.849530114141913	2.58962806859639	0.377589134438936	0.820460559788379	0.116682034826928	3.71997770519674	0.125150279054047	0.0346339605779923	0.106959079020356	0.326092548592185	0.84090105559772	0.102572325192818
2008005	9	2.47541044520599	0.279449292710132	0.071298669181125	0.0647876223919017	0.231431984625211	0.129263052311288	0.966223766596277	0.880211209425469	2.79231083942176	0.366869500212306	0.852001090378545	0.110780876356054	3.99295572511657	0.131330325502234	0.0437092852484884	0.168643641646124	0.312840836805094	0.881258083674323	0.469866427548888
2008005	10	2.64555275077794	0.247759708740566	0.112143708400898	0.0617007645054542	0.212954467585749	0.142378766146725	0.994970158853792	0.905307365297717	2.75451193732351	0.354500386180831	0.869164283942952	0.109799285351184	4.43586593374379	0.141973707568436	0.0488903601765616	0.189353538386722	0.294653664228585	0.987906190871867	0.718325560379941
2008005	11	2.49144721521106	0.176026297015829	0.15471525539473	0.0615596567494453	0.20872743715595	0.163250626720398	0.985781632564856	0.919758390774987	2.73620105402855	0.327888325338976	0.895995763009431	0.105631168295129	4.66354425440536	0.143788240526294	0.0550547355868474	0.165567841011184	0.274494450279859	0.991978753146248	1.06754066362534
2008005	12	2.25685016177093	0.170014543422598	0.119753948472675	0.0744991319845868	0.223522209126407	0.175337292973314	0.942478726852205	0.866402413363149	2.83219517062726	0.308339739946293	0.915881186175986	0.106713348982922	4.76472634712029	0.142884649698649	0.0397781378557897	0.130465416686673	0.260804179150518	0.914089462541712	1.70274565632512
2008005	13	2.12917996757675	0.0982173873830546	0.0759859851357707	0.0750048611620852	0.234838562511459	0.171215391197601	0.862326447846078	0.72482614124593	2.89271969120897	0.338830589780756	0.921059543379924	0.108652241562355	4.8822039766725	0.141225069306299	0.0368899114877967	0.106739506597131	0.240975287998274	0.893728119496293	2.35198027967134
2008005	14	3.20217132260199	0.0894965049254005	0.0533067296519485	0.075262401324107	0.248875190232605	0.172591599892419	0.732727865328644	0.512248383702283	2.9485355125806	0.420111114753747	0.931901498093078	0.112395537342219	4.77348324561498	0.135956026181509	0.0312107782037043	0.117501861716176	0.21526446403238	0.917149560320837	2.43421152236456
2008005	15	3.6582237323131	0.062147156551694	0.0318803516415175	0.0901889249656482	0.273148513093356	0.161645770561168	0.535173885694422	0.459185458101703	2.97910220997316	0.4421726477565	0.932111252385649	0.115212752460548	4.63879423339013	0.12741264842573	0.027609257102042	0.0877100857527232	0.18369252261471	0.991774261350824	1.52683590618581
2008005	16	3.48020335210538	0.0391297604901636	0.0253222077047648	0.10044074336711	0.247909685692258	0.154537830756839	0.378412448778044	0.482655534860227	3.15271337142684	0.381098241197818	0.940646200177939	0.116599351175899	4.20826191266383	0.118192524110076	0.0269286636984503	0.093604237681424	0.153360452268977	1.06811162106838	0.868333888175876
2008005	17	3.16717702196075	0.0323670374517334	0.017383216966434	0.101596984660558	0.216366518828285	0.111891132938625	0.254841103304896	0.493020664288479	3.20703450314823	0.568225311940159	0.956101033306479	0.119791323013498	3.76044352888211	0.109095154832293	0.0314122978945645	0.0871740879902045	0.135938882530008	1.18527615790937	0.65499329295837
2008005	18	3.29417783183741	0.0482441361063573	0.0111903238170545	0.0851230982357645	0.201154306190848	0.0623447909451857	0.185930614697919	0.717033079937976	3.13319011387003	0.501714806700106	0.998122812367815	0.128131430004684	3.36510060918628	0.103329184564874	0.0385559286600853	0.0835825825640524	0.125809141215316	1.33107079974506	0.662079899368223
2008005	19	3.7279158359633	0.0858312432285036	0.00895748719572668	0.0681021223623358	0.179895132040982	0.0392936374909969	0.146662278596316	1.22089941533754	2.90226345518017	0.408899174010204	1.02171273801288	0.137839904752793	3.01200721770701	0.098619320868044	0.0520329985915006	0.0803778508265427	0.116531922592078	1.49325137168308	0.900443201647781
2008005	20	4.1317992045716	0.125736168190582	0.00561212488490902	0.0442987807716928	0.156388626874915	0.0325909281164111	0.194570239745699	1.69705238885144	2.4250700416374	0.711421613169691	1.03741038061701	0.139176347954143	2.62229813925484	0.0949652856717915	0.0727375397172819	0.0750752687624084	0.114239037896003	1.53287417047969	1.16489470776972
2008005	21	3.91721176633923	0.137752229551332	0.00300885737087737	0.034164413928818	0.157721843784994	0.031607151322819	0.353517674028283	2.0633549537142	2.17177618552628	1.45422597269758	1.06600372367227	0.154040232677332	2.11624837966749	0.0944951391750355	0.0757798801300835	0.0749772643964619	0.118576939789075	1.62197714125599	1.10501481123395
2008005	22	3.73893822948125	0.140527911783492	0.0024917087294849	0.0309096398943408	0.210297994373077	0.0329432109022232	0.521500720329348	2.28138725965048	1.70031424728929	2.02698027849349	1.07155741871552	0.170929831329209	1.58633026421031	0.0967684074455566	0.0836875884802801	0.0658403922860212	0.117448012065956	1.87351531798739	0.855285273173765
2008005	23	4.45170763226745	0.143822252607942	0.00276817573554387	0.0304669873631834	0.336695313085693	0.0327159679165359	0.637179245713071	2.34379339431028	1.52328997417099	2.0910094810758	1.09055250229185	0.185131280219364	1.23649634858956	0.0965452469837725	0.0771582304893555	0.0613150935037659	0.118142035384452	2.14093876418622	0.647447919316181
2008006	0	4.72600061007346	0.151875673844256	0.00392641113387364	0.0313104970197995	0.41451981408139	0.0324465111155519	0.716849293774152	2.16999090337379	1.69273526738383	1.67191083478317	1.11312056554784	0.200157764993809	0.851051765831186	0.0959448232223624	0.0694679749111521	0.059039639762563	0.112395703244451	1.92356441103522	0.594249495234613
2008006	1	4.52533564127032	0.16802169841978	0.00868694108257312	0.0307475308566939	0.529418057793091	0.0351209365193312	0.732327195508092	1.6331056112563	2.48237618149568	1.35116452617469	1.14490162165368	0.217833072387114	0.644741344703533	0.0952857983489535	0.0553075491433355	0.0667988147943461	0.110499539300603	1.56245059038251	0.576972162118064
2008006	2	4.29775982433013	0.170990505700724	0.00615660398816341	0.0301665227796314	0.531381573242719	0.0397197426367316	0.700613626232554	1.36536224322955	2.47567880724951	1.71520453845459	1.14775327357976	0.243714481854099	0.495623697601162	0.0913533714792742	0.048068277032928	0.0657540558084063	0.107191166341445	1.57260930654541	0.566201534949836
2008006	3	3.77924906229589	0.158016714130165	0.00291531754015067	0.032501454554621	0.406065917722086	0.0459553423351664	0.669360515616477	1.44457055029471	2.77512044510388	2.39223334972788	1.15032875100464	0.261808482396452	0.360305700308574	0.0836683254921753	0.0459993041602373	0.0778468281368631	0.0974403990717094	2.07359441611468	0.565685829961327
2008006	4	2.33383111964354	0.143448490731783	0.00253685600392658	0.0363063179907963	0.324366408713008	0.0597884172599275	0.7405741700858	1.60571142833007	2.75020538713705	2.64501174958054	1.21612791504225	0.274981008929169	0.242893552835124	0.0772196717779585	0.0466347378240564	0.0992073736977434	0.0844397872010259	2.73400439214619	0.602531939263032
2008006	5	2.36260489796811	0.133664353968498	0.00332639996336372	0.0380719289962018	0.311832743329484	0.0823986190381771	0.884846106187908	1.74431612906199	2.3379782471146	2.83261208504872	1.23487847327704	0.292146924239066	0.197324013826079	0.0717099278300261	0.0449923529966552	0.0871496973518	0.0799000437953181	2.78302812804754	0.588590645944403
2008006	6	2.33922708402516	0.123916742201506	0.00243604928010994	0.0387526341945787	0.33070448162448	0.102499559611695	1.0421466038337	1.69267624299318	2.4636854986557	1.91012810643834	1.18245010979725	0.298265307466765	0.147331874480272	0.0669042860276252	0.0427748909092606	0.0847424930648808	0.0818310843015372	1.77394081528782	0.609935071565363
2008006	7	2.18826597003051	0.109276329491964	0.00173666069782627	0.0372471577363393	0.363856977979464	0.113942852343223	1.10342439535745	1.67179715329455	2.88063667942022	1.48005033785355	1.1536995040513	0.308895342144	0.0873374718567336	0.0634851444898763	0.0436774081111718	0.0836156598077664	0.089341746675503	1.35874651667086	0.761560778692219
2008006	8	2.14704088889271	0.0965826265522784	0.00155392889223963	0.0338141470950657	0.393793028008675	0.120120813508914	0.914779800090698	1.61183713947582	3.49990280031285	1.56068443437615	1.14209615472417	0.30342321690933	0.0652178285028281	0.0610924527190944	0.0464192737361159	0.114216643212686	0.103596443912704	3.07416665108335	1.1510217732151
2008006	9	2.18245882459074	0.08772610134843	0.00154596194306565	0.0294153560090949	0.435599062537085	0.117992777187735	0.740515627076401	1.57093792967861	3.63274946227477	1.75368475254628	1.12095121971349	0.289144408075756	0.0591043716798264	0.0595891314934587	0.0660926739890865	0.123535150780341	0.101466307656808	3.67560639634348	1.07644532733031
2008006	10	2.48835179768823	0.0808327355377511	0.00161629652505074	0.0255947325794474	0.514785536047192	0.108009655915816	0.637775600078961	1.55110037887261	3.48042602492282	2.05656465297773	1.07518555790532	0.274753158737961	0.0654929654657364	0.0582673386555934	0.0610304393769601	0.115467581243928	0.103411766045102	3.63685559801677	0.909859571389485
2008006	11	3.16437327663235	0.0882028196851555	0.00198577440000707	0.023226249995014	0.605789553144456	0.0894036398550951	0.585737025430458	1.51880151342142	3.16457990979202	2.25769674044126	0.999855577173979	0.282569179472896	0.0682920800972626	0.0562730121553037	0.0447846873759333	0.116191689265753	0.100420304542961	3.30006063680581	1.41335245856713
2008006	12	3.94086423625721	0.220873879260765	0.00721782371665936	0.0217200611341398	0.692780328755764	0.0659707941315393	0.585314262569496	1.46225270251056	2.77541697838508	2.52599419006987	0.923906094309338	0.283003948533094	0.0775119486745362	0.054355810049028	0.033942057403882	0.149064227272848	0.104089036503876	2.82717006700826	1.20958511762233
2008006	13	4.43869684899084	0.44717673959963	0.0119033807219112	0.0207704061907758	0.790659148113046	0.0468005858100672	0.605327320793976	1.40108713684557	2.40156034290825	2.90253230853391	0.857248962585668	0.284897492789193	0.11424619498765	0.0527784161173382	0.0269292801035949	0.133048837470651	0.111711555915258	2.45465887313926	1.14308230205655
2008006	14	4.51072644262278	0.408430670498997	0.0116927662058754	0.0203934432217407	0.894312566077868	0.0446713134436988	0.61813892131306	1.32823876788994	2.11456233501977	2.92091451518168	0.799157752263589	0.29137145738118	0.153364455091528	0.0514606368135617	0.0139283869062703	0.116070285132164	0.122811846981796	2.26920323927455	1.18269782509299
2008006	15	4.41189453974261	0.367820189291098	0.0122034931451918	0.0209530766967117	1.00219501198805	0.0480587391294192	0.620357559438396	1.25458861465122	1.9942673760827	2.58409547267667	0.721622765938678	0.316706319385607	0.25647427457595	0.0503615237315053	0.0111846251108289	0.105556834719586	0.13584404708893	2.19709027813759	1.11620147595879
2008006	16	4.2743020484983	0.3626444277124	0.0114863363196086	0.023602545429572	1.09630453960595	0.0435152962978832	0.656305926133722	1.19687806514809	1.92866397353838	2.22836519349727	0.647429264671956	0.328275588565465	0.486208568011892	0.0498990006353539	0.022052118415001	0.0961011098555154	0.149578356103069	2.14958888452221	0.491493268841628
2008006	17	4.0205559598184	0.357700060472382	0.010061022441141	0.0410082561445536	1.11632707466727	0.0369784477787142	0.735822183103198	1.20588743387686	2.04195442867344	1.95830179445455	0.58883587918651	0.326296983714802	0.827434248157738	0.0498350373656098	0.0278250111109827	0.0855546112055347	0.164452171942562	2.23345975033093	0.407874627437411
2008006	18	3.53890260614553	0.352200673321475	0.00919556467184167	0.0949620054032094	1.05220374554234	0.0463437510401712	0.867623145276108	1.38149290846978	2.20509144557417	1.79631138084872	0.531237223315967	0.320370981411263	0.978717851304586	0.0499758800057216	0.0284095771228513	0.0784785396625982	0.171243513509151	2.37872964619021	0.381688544251541
2008006	19	3.11164089958661	0.349505466165443	0.00857627290001276	0.234710336241673	0.985594801314627	0.105281109619497	0.992106760635356	1.74810282482395	2.39231331557157	1.73224425990918	0.493692075988136	0.31693833366788	0.879019325650208	0.0498932635498551	0.0297732894769505	0.0717237840430181	0.151523692216069	2.61331673743511	0.433843087932572
2008006	20	2.8502632721171	0.349195925160168	0.00789630579696023	0.411608077948347	0.927254293677469	0.189376806359916	1.03288963779821	1.97174109460449	2.70969124208669	1.72995423883833	0.464257132569884	0.305977862281249	0.660351869655784	0.05008055827838	0.0295101030286283	0.0576013565076943	0.129995766398215	2.86236862453828	0.529592136282921
2008006	21	2.86777695016372	0.357318118241725	0.00874890358739159	0.792609738550776	0.896427218647178	0.236806460170357	0.965635478969955	2.18340884898472	3.08659326825686	1.74566831838288	0.440146843823201	0.295995752686202	0.372719019247597	0.0516224725185227	0.0269950488999748	0.0410134365920194	0.164658051131954	2.97209425971379	0.580461391866995
2008006	22	3.04887784932437	0.370302260321271	0.00909499088022043	0.865378258413435	0.90009405485668	0.248264501457586	0.880230821995849	2.03771982424907	3.34792069839135	1.78911725905778	0.413980958454281	0.291423131836806	0.212373333091656	0.0758831591795788	0.0229376304783191	0.0526406973591347	0.249232196479636	3.02163104268394	0.551622301361846
2008006	23	3.23989313281246	0.330785261439585	0.00578461951531583	0.789845972915186	1.00294257198569	0.233263995799569	0.810727146699613	1.75145703356355	3.33377619176888	1.81606302444919	0.384564061501613	0.299712620688688	0.142494626460583	0.21146831994464	0.0189336755403877	0.0917909089035331	0.4864216581687	3.15660325980027	0.464926106662611
2008007	0	3.34403480692893	0.373340548542699	0.00309972826679218	0.575359725137487	1.08250907626414	0.221376163445796	0.757394782180544	1.46113445725137	3.14923108601115	1.79963972540072	0.351741579239024	0.305514835613422	0.113187472632299	0.468806379486388	0.0174614733177366	0.0915530547724311	0.571596278332902	3.18134591052512	0.385772904615266
2008007	1	3.36653793282191	0.41074802579207	0.00219748557706442	0.421417706279478	1.40996483728267	0.224848341638284	0.737197722692194	1.2519951099408	2.97476819109641	1.68533176026878	0.321911151362881	0.261325090127402	0.101864805738898	0.696903804355196	0.0197117276607496	0.126575174172979	0.547976228580926	3.06300616663567	0.354675152075706
2008007	2	3.4779125117558	0.425185506225521	0.00226357838420041	0.316736912783214	1.84445299043874	0.234429719676993	0.737289621253695	1.12086464134035	2.84071228518564	1.5343970093483	0.29862843945868	0.247866954481861	0.259743901978253	0.74833202262321	0.028491145961084	0.131850871458299	0.469602664168621	2.97609907915039	0.551020804198094
2008007	3	3.21215725212472	0.358248705842134	0.00357567851319749	0.296199266780135	2.00127427300594	0.238673310250088	0.745370708294859	0.917537159317184	2.7276070087471	1.45513135947213	0.275924644927436	0.237184411928512	0.638295896130642	0.661693722121114	0.0348493488519199	0.12706980513658	0.392305300007557	2.86351953326882	0.48110767556232
2008007	4	2.76504956553099	0.294239381202776	0.00376009064463458	0.324499693498395	1.71765238419614	0.232482447206135	0.733451823698782	0.779571413026814	2.75485865056283	1.38551576062738	0.256349208357936	0.226362565528795	0.833681545567115	0.564024529694503	0.035683857888288	0.142023023683683	0.367174899803679	2.69361281010731	0.344347112042175
2008007	5	2.63388796880619	0.238872330400942	0.00173361496631057	0.624927381238974	1.11190627448929	0.249280854988554	0.711776794273357	0.809883975444055	2.79790222378986	1.32229423455917	0.241952198124204	0.22004970280083	0.983377460098058	0.475677889049257	0.0309027668956722	0.161202135861101	0.385724553683559	2.60953890385214	0.108617102332157
2008007	6	2.46160862629328	0.234069350153138	0.0761554714181929	0.708730562652064	0.893187819069055	0.338687047434703	0.704112451183812	0.9209226946287	2.75517437614632	1.30828952033639	0.230460698625483	0.217618238583865	1.05150993464869	0.401039937419668	0.0283370481780801	0.220408783613143	0.4748027093214	2.70835532602623	0.0141061780307202
2008007	7	2.28597909023127	0.292348503392422	0.133478713360085	0.802299918960978	0.82265986197891	0.513851767105315	0.644470156589869	0.782405209623538	2.37983889706609	1.18394349620863	0.223850613002915	0.212923942378732	0.931238294461395	0.353153049674386	0.0277798858591565	0.256663824192715	0.689614878734026	2.90525210048637	0.0303913969973722
2008007	8	2.22346382983621	0.34889999616696	0.40919173158088	0.753410176488718	0.930363476786514	0.506026612483514	0.497154089173092	0.746221705637679	2.23870771874157	0.901384338424607	0.220231606051244	0.213721886639352	0.828245971167848	0.300283466149606	0.0286149366690146	0.714380403180922	0.830442052209156	3.03572170561536	1.24938239066182
2008007	9	1.94768019438726	0.284267859659131	0.435424444550951	0.488170870778593	0.859789354717155	0.611938507377529	0.421821472186895	0.734659764370724	2.22054600955584	0.941785454290499	0.216501956556918	0.214933417419019	1.4156708679498	0.40540753613188	0.0360614926081185	0.717159153662538	0.758386456695861	2.93369160329404	2.22716625549424
2008007	10	1.46730964279431	0.163892884928013	0.219856238106874	0.339678735216116	0.714404334487312	0.505274867902274	0.577115785171656	0.712293266206947	2.31260063779197	0.742757919548233	0.211623108915466	0.211323566535908	0.473305219123845	0.711452104573015	0.0539254841277343	0.646452932162786	0.660586986374586	2.45050098958825	2.9578498645986
2008007	11	1.00646236644712	0.0432975529031866	0.145345184283454	0.391932300418957	0.673141574331721	0.281487414533962	0.639514533061885	0.716165261994543	2.35514888250861	0.502536788002872	0.207227464663471	0.211044512509655	0.231547993247666	0.557237789652878	0.0684216561355423	0.638584282879041	0.60243733017594	2.30191172823263	2.4693514471537
2008007	12	0.669550404697216	0.198207301079962	0.420551164633978	0.329538083866329	0.417529346639287	0.0493521580557402	0.682468753146825	0.762087258469023	2.30987425038784	0.359645101022783	0.204618336995657	0.214867149170499	0.535144484540204	0.544955762054986	0.086963817303017	0.680406244321536	0.602577322296486	2.41144424779186	2.78137995546015
2008007	13	0.468408006296413	0.181448234086264	0.641870257862633	0.190772502881695	0.363405743178424	0.192512817897086	0.596642863580339	0.71658394923413	2.19825955523357	0.3563830111068	0.202685174987545	0.223445263303734	1.05402792496403	0.574034936921927	0.111400872077642	0.518266444506039	0.583006647042687	2.47927607331899	3.69550261823506
2008007	14	0.420196139176702	0.409213335575867	0.430096046415176	0.0810289143615315	0.39650695541217	1.07602164965373	0.516230696882207	0.645042301912583	2.14733673393732	0.412820363819207	0.199841263407268	0.234753857032774	1.15922727682529	0.692752537213694	0.13885198362512	0.245545118434735	0.62262021173542	2.29155384108588	3.63612046794218
2008007	15	0.460801076130343	0.253334066463262	0.299711360551488	0.260454984682403	0.314660653803338	0.914250557024028	0.532057567170088	0.655622521543407	2.09774820922645	0.448293041070128	0.193797581803032	0.243519565222767	1.03746219143464	0.818185018155084	0.164821488957435	0.0862175574780517	0.511694891411001	2.02093904628251	3.05846216496292
2008007	16	0.507586047132582	0.599529195476094	0.276383987880525	0.556961283216154	0.293625640340274	0.519032843582984	0.621351668026931	0.608344560138239	1.99182640997362	0.475486970762093	0.184147261219642	0.253987291747083	0.80790308452476	0.512362945811939	0.163468643327897	0.140481243765752	0.549362644713205	1.7573839721437	1.99853629376033
2008007	17	0.493521802182043	0.289165734617266	0.273831755506959	0.281091401396154	0.551983149671933	0.539046600749747	0.684976218563599	0.722477587604268	1.70877082285259	0.508669249781462	0.174777513269037	0.25637078101685	0.605775278025446	0.456142838566695	0.160570682792075	0.202303876999977	0.631454065658002	1.47037991733039	1.54070704141616
2008007	18	0.476760654932957	0.248351903543215	0.306946661278368	0.194915579974797	0.527169044585006	0.868149170511539	0.734660774276015	0.732189997653381	1.23987160158727	0.542931947795953	0.16380860646602	0.251026283390211	0.623631196850072	0.746456551376472	0.1585961249838	0.43414428774462	0.76149177884631	1.19091400099568	0.921170532276294
2008007	19	0.73600959662713	0.159436535167659	0.318787270123486	0.181206648246361	0.458431211143612	0.911262790688084	0.769565006938225	0.739694247348116	0.851174064885969	0.56686425716525	0.15930523962287	0.235150245792353	0.51571337122362	0.466385494626299	0.16358297616515	0.366361474603572	0.863201288399398	0.907705031180114	0.780577284824318
2008007	20	0.648777083803672	0.185133439969502	0.308502008672312	0.148588519350103	0.484200997005398	0.815496987899473	0.631856863522373	0.800621355158717	0.765856559584182	0.599279595393836	0.151729669096942	0.221223093663423	0.431613343174742	0.316817822588165	0.154852681347421	0.332932927204155	0.713402911413791	0.680929781468348	1.22210284568708
2008007	21	1.86988078222109	0.497958933318634	0.294796160862041	0.0810396864160824	0.630291639281638	0.832106049854766	0.548456842146156	0.856246631185542	0.733418417892335	0.700512066134577	0.148669965653505	0.221710935553248	0.369821522330528	0.248429625100865	0.145133230287003	0.406610033957108	0.404499025053227	0.625599229830009	2.6705890430595
2008007	22	4.40524324336165	1.09418945140901	0.320617618619738	0.135146036790081	0.988854603891837	0.732639809117652	0.519735177518352	0.952891780084921	0.641739564488344	0.784836753305479	0.145711708196501	0.224309428240625	0.399196834357324	0.220619442266574	0.165729692897019	0.46382864436894	0.170655678727418	0.576075910769183	2.44784385581601
2008007	23	4.34792363744318	0.879874667655598	0.307327321413277	0.324549585907032	1.08801370888559	0.619344993511867	0.448279695950599	0.944998816208326	0.51861337512875	1.02336234687335	0.142002312803124	0.228367653823105	0.480456826907495	0.249955253207647	0.384518772675409	0.453382303804276	0.131836035089609	0.492185472661635	2.23184383421416
2008008	0	3.74488753016103	0.399479438964096	0.22574744557616	0.286074694588007	1.14468534217738	0.470923186258465	0.375889031806757	1.87013399703683	0.4288231962988	1.18269362153671	0.136233765528861	0.223119823166502	0.545530085974154	0.210514333957359	0.152431374910641	0.47089707312313	0.218704632918477	0.425338157156755	2.00066965312384
2008008	1	2.91663402369185	0.144077630065363	0.197381272483023	0.689281737916041	0.938317558469894	0.348890765714447	0.515056576848745	3.67237853868783	0.374335075393719	1.61564231214679	0.130814119082698	0.220350760229511	0.580213910437416	0.164377894194821	0.167868651779974	0.47915705139908	0.284353650637777	0.395368786817553	1.68337402496199
2008008	2	3.17456205131252	0.489473635069913	0.177995806443213	0.324208382805826	1.99332179149434	0.55108158015921	0.434216148020631	3.55363684908738	0.348286069886876	2.03574465785655	0.143644507348022	0.223210640250169	0.621172155124251	0.131604645615129	0.195734933318162	0.429905231068759	0.257712133536335	0.41276869455611	1.46413418975857
2008008	3	4.3740513533487	0.837381295683629	0.168574178527384	0.183111658621378	3.15193691937551	0.66129448927502	0.476211800149651	3.0820024241452	0.373920950999277	2.17990248898347	0.158074294902867	0.223869926687779	0.635956077337015	0.108786765671837	0.155127908589998	0.303192696503532	0.333640024825013	0.484152577450437	1.21301089990702
2008008	4	6.50223391692145	1.31955898537078	0.165633560442725	0.0365301355273115	2.73224714201965	0.334807894980478	0.625210465687028	2.56152873906306	0.484658527288636	1.93577240587697	0.174880364213006	0.219766141488336	0.632029924501494	0.103161076055251	0.139480226416717	0.304595112426276	0.932235839246195	0.598857062607462	0.550729911035244
2008008	5	7.50287880307659	1.49548318157539	0.183714572381494	0.0465570171674438	2.28340182941557	0.33427205535201	0.947857055775959	2.59481959198551	0.668273770492933	1.55760505219646	0.225130314681076	0.215882681507868	0.627795010097772	0.110006880092046	0.142140988290715	0.402533410387326	1.12336792261166	0.673963182590525	0.442254911104522
2008008	6	6.22712101032721	1.70618536663828	0.246221916841793	0.24987606017832	2.14079234009188	0.620034082519855	0.885479071143388	3.40224363144072	0.842205118680192	1.58063669921831	0.300761506637319	0.215883470828842	0.627560843565425	0.11783987693945	0.0923381951433488	0.384693373826453	0.716159293007994	0.753318840977818	0.495588285824995
2008008	7	4.54815051088819	1.67966091447388	0.397501427620839	0.658239683076872	2.36584674919904	0.675385586120993	0.68633960579394	4.96411622271515	0.987479527487696	3.35191806796952	0.382048935325427	0.216154766381709	0.580763811415022	0.126841142530598	0.109031532315153	0.273697747576153	0.496476371906924	0.8783133069839	0.664247723122011
2008008	8	3.74051982111303	1.00899170400533	0.341778346203792	2.26032528094737	3.16064816647976	0.558184757688553	0.651915018117445	5.66311464998749	1.46707998741261	5.13729145330207	0.346356583393797	0.2135153078489	0.551900352110183	0.1309640840736	0.212956317995824	0.227770577948059	0.435207853169297	0.932077354464337	0.595460263442195
2008008	9	2.22537368368652	0.384163432125337	0.278233606602687	2.12265673117786	4.546436355782	0.45731502523388	1.52616717569677	4.77799940514399	1.87723572514337	4.23576169604125	0.313364074235766	0.206268195243573	0.527488494841385	0.138357189994726	0.310415190658962	0.30058754146485	0.580294656901202	1.06871553014094	0.396536264684444
2008008	10	2.96371636968056	0.295209299336273	0.409712744321306	1.73315067528449	4.71363798590102	0.40451953166858	1.87183429875142	3.93043767881376	1.77924026481969	3.07215999812806	0.332896395921385	0.198542356195736	0.535261553696098	0.175355254949075	0.322550152514768	0.346606018973714	0.981256956429721	1.29186992234012	0.31777009268251
2008008	11	4.13547199007475	0.497384122855451	0.686132384928723	1.01419291653085	3.6919030060341	0.28341778190232	1.46286014152168	2.71167205660414	1.72202637477615	2.03238835502833	0.438262610001469	0.190287044669835	0.580711583712476	0.292830657200607	0.281490621356442	0.358037951017996	1.4080573852654	1.69761917843328	0.722566856693835
2008008	12	4.10725252403945	0.862509747582036	0.887999050264135	0.326553631222016	2.55663143881693	0.207573644245952	1.02984889615442	1.12527091485334	2.94334956409511	1.05965702422329	0.511818024299792	0.178650994691761	0.625378938589365	0.346154153275581	0.140322147328077	0.417637856556893	1.6615310229715	1.79813473719434	0.884435162351658
2008008	13	3.72398131580213	0.937643026950432	0.829441015128783	0.202071046181347	1.4467599109938	0.301055427952444	0.697164535237148	1.19884803590092	4.10497796185789	0.998359570320002	0.544044646824767	0.167168240475468	0.740991003088124	0.32944973124424	0.134623558650003	0.334296263367712	1.60739389927056	1.95604481831569	1.00331286493298
2008008	14	2.66834876176558	0.591761773156166	0.798054157860226	0.281327737011096	0.92266818210078	0.316922990550012	0.478080110771402	1.28251353522396	3.97876662845754	1.7093622279921	0.540732099527236	0.159133103017947	0.95076664722192	0.261165241667422	0.128838903760827	0.192352279148841	1.08049524347074	2.75391388196255	0.624855155090166
2008008	15	2.29327286024732	0.315526284256418	0.738902825259886	0.385957926582697	0.710709450151899	0.235526365710883	0.397619487256751	1.49143069681648	2.81134528168547	2.17688118938652	0.529278653878354	0.155122640572909	1.15810627340514	0.23419820890058	0.128773643798001	0.086104144527867	1.25297145568543	3.50052923370114	0.401875962817378
2008008	16	2.66575934852433	0.256575291446207	0.658480698431212	0.359049245453365	0.536668029798668	0.194082945808713	0.480850162358702	1.55238837140581	1.86037944223865	2.10933290043156	0.511364974440357	0.155198738459459	2.05230419555925	0.236697035016438	0.103060037126612	0.0755832120512133	2.97201072083766	3.57125787208356	0.369153805610084
2008008	17	3.69287656335711	0.142256831663727	0.602083221061099	0.250051121821142	0.500193132648506	0.222157763045513	0.672733235614641	1.37764237263237	1.42909841291602	1.65820112207769	0.496368908784714	0.1582385472665	2.20882001111096	0.299285295081317	0.072965335778565	0.0754284004256921	2.2756724102743	3.48289095265076	0.348225961739138
2008008	18	3.83257713516683	0.129361725518515	0.623118520695275	0.177043788279131	0.501540287597169	0.2096451086765	0.725750540107832	0.934335500817688	1.52636383569104	1.33211478861439	0.496608759190318	0.162209937357833	2.61158635602632	0.388526633839004	0.0620373821834661	0.0781811216022284	1.67618910512975	2.59544038911279	0.34609248474911
2008008	19	4.05067326679804	0.125794565709906	0.611270807075961	0.167004817818626	0.457204909902491	0.116001230049109	0.629687768382317	0.567244921437415	2.36079286184269	0.784689389127496	0.494146618240823	0.163223664343827	2.2335788333059	0.463362565216664	0.0767790404937816	0.0797396194425008	0.959870709230642	1.64644103491589	0.371622504585093
2008008	20	5.20986149601751	0.133040133557288	0.598609308238828	0.13524001065328	0.408679084326094	0.0803920629451051	0.40641651897791	0.552641002926881	2.54146009531703	0.192006462439321	0.491796275030408	0.165570636653816	1.73954559589471	0.508728538922099	0.125920567255807	0.082946886782287	0.374286915647212	1.4679511646487	0.465525531691757
2008008	21	6.34352472333679	0.180979209241178	0.500660953565739	0.116574575434754	0.349707215005899	0.0701967306916568	0.128367946515776	0.564181774546531	2.44532895418842	0.314233777514247	0.465310391694014	0.176471822280332	1.34481422958758	0.588315006186841	0.175700602345889	0.0875169445936666	0.27803790926466	1.77625720058306	0.449352494394788
2008008	22	6.8182713726178	0.220701266774072	0.366110423654147	0.056459754856753	0.290473763733005	0.0721999542741061	0.0887226926790571	0.640337722160857	2.07551298839764	1.47970895236818	0.415502886472779	0.219645899615759	1.03409909238619	0.557875679750384	0.194114436785702	0.107641412059191	0.288322037284216	2.42168220288381	0.603212093897849
2008008	23	6.2196965304205	0.282420420059558	0.2510422582275	0.0531421591894307	0.270465811974569	0.0961719136130084	0.246376747726329	1.13552173092481	1.18206381358461	2.35589519917211	0.355238676329495	0.243084063380332	1.04101323398515	0.575885893449272	0.189640649677396	0.12514691362146	0.267762399257703	2.60638103090272	0.594218443411262
2008009	0	4.23828548407129	0.449630432864896	0.197043376867521	0.100926844154502	0.33004022174378	0.126733579804274	0.481595603380011	0.88026351355454	0.525765824850564	3.01096672164608	0.290524658829844	0.226465175205865	0.840947287000496	0.600209328455521	0.244980380764336	0.1124434036628	0.256200308494771	1.53481895553165	0.439652830445272
2008009	1	3.27323874883623	0.56278011784916	0.173969452669177	0.115600883759005	0.379223207871607	0.139848377574592	0.748743470685156	0.776045934355897	1.91209508113688	3.76105354552242	0.314442463636257	0.186027031847455	0.390501983086219	0.592584665545072	0.228012386079555	0.112749436119537	0.222124888105158	0.525849934099161	0.360779705016156
2008009	2	3.69887621466969	0.512343064965055	0.18344723718355	0.201182503555552	0.387869332361628	0.135526735257276	1.02916851613712	0.824035638597078	4.12469820821532	5.86602275935922	0.313574853031813	0.158717218377227	0.287726524337721	0.582648516345021	0.178935162258058	0.106612319391814	0.179039750235886	0.838203627140937	0.313358434421794
2008009	3	3.91512866990431	0.404745222026414	0.16068867748827	0.188059316660463	0.357902126996754	0.127889340488506	0.820241194222938	0.679319414699813	5.37681987115672	4.55360453763516	0.263439756668276	0.14183884565401	0.43881730445873	0.614363170740359	0.1792202373374	0.0975620416506471	0.165924560156373	2.912538609678	0.270341207098576
2008009	4	3.83236626508402	0.35730667932871	0.138138130168449	0.212956446871756	0.379483568395098	0.114933837563353	0.666554520802735	0.609161057949266	3.87950095308232	4.37438700648909	0.232588605698817	0.13182514700608	0.461412943876428	0.819046223217439	0.183841590804377	0.0894378217587661	0.150185041286165	4.95000186427386	0.295269744977656
2008009	5	3.85442127541726	0.358427785265662	0.10745998343279	0.194672840551703	0.530213075308275	0.180601745584803	0.826258646098721	0.732034308333917	3.18245941655142	4.36669884521106	0.249494795368321	0.126860652120959	2.00747626825161	0.874589615362772	0.189199902182447	0.0887325983925399	0.130041822757339	5.1634351831029	0.313180146344335
2008009	6	4.26291838765463	0.27519472834448	0.0844687858408284	0.157282346329879	0.800173436281324	0.288071032385953	0.950348696898739	0.856618472891975	3.01794654637364	4.99948147494121	0.264081587923119	0.123734525531732	2.85968579971631	0.735900788116073	0.17798648816243	0.0909998328810642	0.195567920989409	3.59576036398569	0.213579457976188
2008009	7	5.39138385095723	0.219452774688864	0.0792345822161827	0.146006558273349	0.726146555137438	0.290153430796689	1.28923129249372	0.770206903109375	2.85485153997281	4.72840626835839	0.26803167847164	0.118972644639507	1.29896065149337	0.54365634184516	0.155485216949577	0.0875576858979373	0.264925283767333	3.68491361820011	0.510799325526253
2008009	8	4.17442736993973	0.172125839529518	0.0974035231084557	0.152007374872522	0.549127199723189	0.159561462884755	1.78515224812222	0.649914620344964	2.64925483385814	2.4332635186217	0.271226296663571	0.113822806981271	0.37766245877814	0.323831510004328	0.0945687651276808	0.0804316484196058	0.303304159411239	3.5562434708519	0.738541044924736
2008009	9	4.24432666895673	0.134322400338304	0.0940697969115006	0.128823052606939	0.348812778503961	0.121583793654882	1.49472304828644	0.608446199291478	2.6860976964163	2.24035862351571	0.286153433707437	0.108519324257909	0.547852050130303	0.187311567488339	0.192842304551784	0.131892512658284	0.407857710056705	3.50418589487632	0.934358300953782
2008009	10	5.01746668405922	0.126661858542786	0.0909920866668638	0.104607992809361	0.266843953282216	0.121552700376765	0.972973258940894	0.644899937947314	3.0237534527132	5.09438611994293	0.289934104779884	0.106733666737996	1.26123025509065	0.641630658961465	0.281423029747888	0.176939678051295	0.615137067487917	3.71887845053023	1.81936471484153
2008009	11	5.76896696486239	0.147138498002038	0.0885152977698226	0.0933600932396184	0.258289250180325	0.17064360511614	1.60542980424021	0.755894107047453	3.28250185354436	5.6974568244849	0.282011742091595	0.10959869869335	2.59814984368416	1.48864663453417	0.283642116789741	0.140549114896473	0.611014311297468	3.70526849290164	1.43053957481966
2008009	12	6.98048805724967	0.117776586447922	0.0907621601712097	0.0979566050779136	0.259936658830922	0.163696831193187	4.18293901399195	0.906006813348451	2.24647633824271	6.89720290707452	0.350700403539712	0.116168375232507	4.93662692987255	1.47654223841676	0.269197317603299	0.113103681091635	0.361151095457704	2.45410514890767	0.997796087175406
2008009	13	7.03694053718746	0.0591914452029957	0.0940474461988881	0.174146718165094	0.300403301964761	0.119112744950624	4.55658714399689	1.98212842319953	2.71552044091276	7.30942606218142	0.566678194721851	0.124893124150835	1.99310929401709	1.13520605057442	0.300006473915539	0.104958971403986	0.285688690602847	3.0523584073612	0.795157002539938
2008009	14	6.81461205298258	0.038649528549835	0.0934440361033876	0.163274936015465	0.362333838343309	0.103781305166834	5.20585174848745	3.25499565753379	3.70511277621001	7.19947758941688	0.83823720988764	0.139777405077048	3.64114140685227	1.30992463123751	0.352414002382944	0.099921749699549	0.294350683266231	4.30249149370482	0.745728959481902
2008009	15	6.55021919374614	0.0483616615296027	0.0921978317167047	0.090735538875442	0.435542978699784	0.0882065592945907	5.33933374295989	3.37241128153417	3.56446896969173	6.7247716544485	0.966630314006094	0.162965128163299	4.23861108869697	2.27868166442256	0.299272108475666	0.0691456614844331	0.202474281873493	3.91040208816366	0.732185762430452
2008009	16	6.1707212264344	0.0721084835275525	0.0858711402989762	0.058837747361183	0.717384996773457	0.0862575343197642	5.34578739854161	3.11938506726222	3.65830802875168	5.27724438794954	0.82662179658125	0.185650505470678	4.07609285444547	2.01081076603704	0.163500054143618	0.0512629922126854	0.129992727568462	5.02324460955125	0.687193544929749
2008009	17	5.71461072288541	0.0729237889320261	0.0752152903661177	0.0425102238153689	1.04728038144923	0.0769393345914151	4.71147630105169	4.16647615774822	5.00573101632043	5.06981794894391	0.656890060332361	0.221011995009674	4.73934217686753	0.892577315370922	0.108840295947333	0.0585135139330254	0.113074779262645	6.01373799213437	0.360938650360254
2008009	18	5.14323541273548	0.162238619234308	0.0634695441701121	0.0365009386518555	1.3606343472649	0.0688468199080705	4.07182280830619	4.27277755459095	5.38071617584637	5.23002276552114	0.799027923700289	0.268593067591544	4.26550484375792	1.07904961650946	0.0965976284868541	0.0711738096417349	0.115861018745729	6.03257793855797	0.292292389043178
2008009	19	4.95472784576827	0.195473258000166	0.0498606934697225	0.0285599269170332	1.46963427646982	0.0576119718698392	4.03799571663374	3.9300305084905	4.9335612440279	5.15342306209004	0.87397735847018	0.286288527096257	4.06356835179353	1.22052631569649	0.0928644994820409	0.0779472707879842	0.1528940631865	5.15152365455887	0.234346973381046
2008009	20	4.56980223753937	0.19712073822464	0.0458397004125375	0.0300258446518268	1.90485830772722	0.0459078026758982	3.75122233328363	3.32912587218591	4.71121601690375	4.54289206805118	1.04928107284939	0.279682518186778	3.22089884139661	1.14766441647625	0.0891238419122257	0.0922901399348472	0.227035017114615	4.54757701990195	0.219018862795539
2008009	21	4.09201304197959	0.191737673692051	0.0441327479646217	0.116649430525565	2.10164223428409	0.0380275465431414	2.951734963763	2.63838382114291	4.64864700429495	4.07622622205216	1.31463723194791	0.279199065400506	2.0280163994712	1.12064447458816	0.0859950230013399	0.0987362977096608	0.298451841087537	4.5523879538706	0.209163470109921
2008009	22	3.54709242960093	0.181679678437082	0.0428221498882788	0.202844821407583	1.84368311234564	0.0328005238005849	2.72971047835983	2.02793744014613	4.04798826552778	3.60933243791608	1.26352511225017	0.368487537289122	1.73909478042244	1.2282034823878	0.0851887365519526	0.101777651389179	0.441116262385497	4.38145376222671	0.206105607636607
2008009	23	2.997853487733	0.195509707509104	0.0425999207799794	0.162079802679744	1.33092715608337	0.0296452243172221	2.44664958361129	1.48390375774575	3.94236465251654	3.29755167547229	1.21621366797412	0.413056303552123	2.66578157146739	1.30782178197501	0.0874994848571367	0.111180270349104	0.984813048554042	4.32403247801348	0.193512815750516
2008010	0	2.90205493907216	0.244557082724357	0.0446071300034718	0.133410009637413	0.889381968595676	0.0274205016294661	2.11242639826574	1.01213655584997	3.57864620055238	2.91379803636435	1.03528308401126	0.410539965251921	3.0924016239734	1.25086033492412	0.0911342695902064	0.129578901391288	1.60891244280046	4.23862179097035	0.212772386400662
2008010	1	2.88407977852766	0.225942663186835	0.0482790054393477	0.132153437428308	0.584726567002943	0.0263124880591034	1.789080361728	0.751086932028567	3.52848286869455	2.52556279995694	0.703196355364271	0.393524426942148	2.9084330502121	1.0428684820333	0.126332391114645	0.129814433284264	1.54177095162748	3.91064267839803	0.321027063330483
2008010	2	3.63756798765744	0.168458853013622	0.0500521327787737	0.11446179450511	0.398681017188656	0.0259236501896478	1.53362864933953	0.848908473517765	3.52581992876451	2.77225334135595	0.645490035835549	0.304709894889223	2.6029130668809	0.511566370697453	0.136107921217788	0.128587210776874	1.62716561101476	3.71259090650677	0.797392756067726
2008010	3	4.77364607572069	0.145378489845798	0.0495801255885061	0.0998296769109304	0.29262354679453	0.0250783079481559	1.47181225632053	0.894341802743442	3.48509945435653	2.10598673996077	1.18921129450337	0.268471013522771	2.83093670380195	0.451778951398517	0.112324920793211	0.1229645114099	2.12284852432115	3.51343506808874	0.985961494152294
2008010	4	6.71483921568925	0.154346153579889	0.0500347476520364	0.139948393856631	0.310729108198666	0.022379171069736	1.34991706572138	0.846708734843927	2.98580278700962	2.75174517154282	1.92998617309936	0.256046041414442	2.50310047515033	0.682168552921556	0.0940474933216238	0.117479191957793	2.24692310230985	3.35920103970236	0.993909912747885
2008010	5	8.27057272702428	0.183258472167448	0.0551418969635357	0.154827408106769	0.340451107849506	0.01815665254184	1.25878117380537	0.959465998411125	2.5170168370422	1.09537995849842	1.89228460256193	0.267599268270514	1.88523123322959	1.2315110284585	0.0801650178211412	0.112391364582102	1.73134651127418	2.82197500766607	0.619244552235309
2008010	6	9.6816118455555	0.188679387230087	0.0775853735782375	0.165861638955244	0.313220356148044	0.0187624214311374	1.20852340474637	1.14377430968704	2.86516381426733	0.900746565271303	1.64189175862792	0.294769731937871	1.80717176807843	0.853699779458506	0.0686565850120246	0.107988236836635	0.921013246302472	2.63737425842252	0.328229062306688
2008010	7	10.1640119491125	0.223814749892913	0.151408845274399	0.158766832826282	0.37057557461356	0.0340199339722643	0.996850466017187	1.34269534085268	3.38186596546742	2.13002184209431	1.59542730523528	0.276968150631375	1.9126760594795	0.686709592294861	0.0616481564993577	0.106461021375356	0.728684630260868	3.79261230645013	0.260060040213457
2008010	8	10.1915173709071	0.420389456747589	0.134557801681719	0.152573492122638	0.481632283752447	0.0777339696147198	0.924152693197887	1.41301583161817	5.75533040822864	3.75764757721188	1.92136588485636	0.276167496318354	0.889307815119357	1.01865872563265	0.0557372800751589	0.108469668838198	0.713628820662837	5.57987969809694	0.232057459513096
2008010	9	9.70197857971625	0.515102652576979	0.114352370091546	0.203069506775298	0.609252052928282	0.0832616542196844	1.25432220125649	1.24587081297214	6.47564998735249	3.40777330380822	2.08338003089665	0.291893228129758	0.855203630213573	1.37898449932955	0.0494340382598965	0.0953690615936588	0.361447930700535	5.90406019059091	0.21870798660455
2008010	10	8.94933075772176	0.385387080099562	0.108687014301938	0.244505013686283	0.576494111509206	0.0937125976031073	1.38187361356272	1.18784927225127	5.92696395616103	2.76147097748244	1.86134804052772	0.284869205246156	0.829930604961249	1.0880757026391	0.0439950641146642	0.124183931844968	0.237149925551418	5.27490419542216	0.235023883594987
2008010	11	8.27919537777155	0.102735122382521	0.0983244405853573	0.21326771844869	0.395945972194973	0.0256666041512038	1.44500832228637	1.26389189248868	5.25021172235594	2.88795214631222	1.80963411113378	0.326384240225453	0.700047189693944	0.750683162196229	0.0397605159908633	0.11204042192771	0.201871495413354	4.50667056283526	0.445240709875394
2008010	12	7.65358557242975	0.0814276248299693	0.105427309055707	0.163615709945046	0.518199507378828	0.0200330736852784	1.81705613329668	1.25539522442144	5.19319618643301	4.3415409226584	1.75451230343237	0.537740861097719	0.733015435376281	0.538989354777249	0.0369732397826172	0.0935008378494434	0.171553707504689	4.27586806413516	0.464570191846881
2008010	13	6.32746827388794	0.101964576153108	0.0904273667476486	0.122332004151865	0.669711832828315	0.0220025524909017	1.91468887712726	1.22969179486258	6.13078410592046	5.21625233938738	1.9180528188323	0.710612959762932	0.695047528514342	0.41116083401043	0.0355779392120704	0.0964584989523996	0.210385906599759	4.3668372012489	0.359492608867343
2008010	14	4.8042774387447	0.0714446904984585	0.0815470800346772	0.100505458922857	0.776552378329026	0.0347769193044597	1.88603196414521	1.05369741362498	6.27527444884629	4.5323481288826	2.14442401209946	0.662782502477295	0.71260044538712	0.400813684912702	0.0355152643681605	0.111971852807682	0.217287243998557	5.15615115072288	0.230012968297373
2008010	15	4.2709920215329	0.0659720136778008	0.0659509963520147	0.0285298739906168	0.814392551147434	0.0508678979264655	1.95552214950564	0.824039167729058	5.98663943560692	5.24563481723603	1.71385749999141	0.48739437246715	0.773648682002018	0.401603908138196	0.035466246028732	0.120294562865483	0.229015104291192	5.87404745167947	0.232743606202595
2008010	16	4.27706869046165	0.0653658546663582	0.0460407553648859	0.0193431602710264	0.590988973261123	0.0668849737066125	1.70827385336043	0.718669402874452	5.30369673329472	5.5515481488122	1.60821433442033	0.744619253086882	1.07124692874248	0.488379349101325	0.0355375843244122	0.11681530727311	0.29086666780883	5.1749110030294	0.104138195356866
2008010	17	4.33696934875026	0.0447063471724201	0.0388701210454381	0.0148739733496293	0.414231655416936	0.0664321652507297	1.30718533633838	0.620821012518003	4.50972253641564	5.04398657886321	2.4677057263631	0.971666387049903	1.41515966121402	0.562544920151698	0.0357837491514725	0.111423849945099	0.311767210971518	3.79730468228311	0.0790462104734962
2008010	18	3.48297322606468	0.0203788405131303	0.0362081793642191	0.0206895235219277	0.271328881106777	0.0693062272034741	1.13852986988645	0.532351478637236	3.71751119707237	4.95567131361366	2.42075093959793	1.04451016767042	1.16470893144049	0.832401530476577	0.0365462042718015	0.102322537258119	0.244761944032529	5.30095671828891	0.166735113462425
2008010	19	4.42545423490036	0.0211320793432464	0.0373592407029774	0.0318392410459931	0.223396237037194	0.0705722221040109	0.997381335667001	0.488238486239752	3.47406711963591	6.01342591155254	1.73352842080149	0.930217785907814	0.469886167884345	1.14047637113297	0.040792596619497	0.100143683477974	0.183150869699959	4.7055690235144	0.202110896067336
2008010	20	5.1310602496011	0.0225382188711715	0.0394132411217579	0.0346085963149438	0.163925886167112	0.0609266598064438	0.752460584755413	0.6239721100832	3.6110212920756	5.4313633351293	1.64762098361874	0.830156496143877	0.280549949727841	1.39498248276932	0.0536184226567035	0.0981372225853146	0.208065927450965	4.51135982316855	0.201005688380225
2008010	21	6.2166291753553	0.0237040960041422	0.0415606227987551	0.0294512290849954	0.138457042110174	0.0484717487803501	0.541714915404961	0.685670136602938	3.5704386676763	4.95898989264391	1.62760830801056	0.822018932783294	0.200606385812216	1.40448548067541	0.0664834017120721	0.0993058024755628	0.204095067414451	4.80610284457548	0.193297357076242
2008010	22	8.42487752406623	0.0278099262028947	0.0406604886723573	0.0280075060963908	0.132392620312795	0.0420142913798564	0.709551128153482	0.52599459035878	3.76272186390529	3.23708235456432	1.49771282852222	0.773327065545542	0.190847458082003	1.1045792196155	0.074878914845876	0.103008025826201	0.244718369219611	5.44157597609394	0.189458409478186
2008010	23	8.91339480163336	0.0330267634778816	0.0429310666278824	0.0286031048436075	0.166109337709684	0.0420209777444648	0.597489306759981	0.735452887376694	4.71143483974028	2.06749119310265	1.3599501889358	0.713024350331709	0.16402207215944	0.976432563089909	0.0853772399335253	0.107146883830474	0.275962926645596	5.956786935461	0.191306706895034
2008011	0	10.1352325942019	0.0384216398904506	0.0460585391066321	0.0341033108348379	0.271876543472671	0.0644933202985707	0.424806815899749	0.877491278204101	3.91993171331302	2.59013169600759	1.34202617759014	0.632910951747972	0.163505798988677	0.883130122627229	0.0962909927292411	0.109815294785822	0.132977435704411	5.60364499149086	0.17685501407149
2008011	1	10.8723240139208	0.0345996719627488	0.0414223572370262	0.0395967285007486	0.267704251606907	0.070271579249109	0.5088248934874	1.06276924506015	8.13413345735845	3.20206400300072	1.71293388002398	0.674740965165341	0.16158418657361	0.780802849639628	0.102217037118496	0.120084300449361	0.147630011978356	4.20594039025124	0.19100849544279
2008011	2	11.2765741967461	0.0247786774778586	0.0342548022894535	0.0383245388808609	0.334762748050447	0.0645367788237675	0.546795521261698	1.70242279056722	11.071681368477	4.23965836539041	2.20897334018456	0.631979514272383	0.450458167089683	0.614810933766777	0.152865607903881	0.144088717465467	0.150149801545514	7.10539753339718	0.198929294341167
2008011	3	11.2254012533302	0.0215699856002529	0.0292682309547604	0.0374732147958911	0.378306435991543	0.0562197285450472	0.609241242969599	2.02635846059288	12.128345192285	4.33163505706408	1.97386139220874	0.505629018211728	0.665174474223989	0.419705078648608	0.170371353666544	0.169147884223878	0.15220136877908	9.92222033530509	0.24029280403522
2008011	4	10.1768857865733	0.0154566213510083	0.0300641877811615	0.0392328896598304	0.36546444262509	0.0556305261559589	0.749725484508295	2.00580805302254	12.1837668435894	3.86706859375737	1.89582309808181	0.485970907280059	0.909111998629066	0.315790973005543	0.187017329316925	0.189431453444362	0.179528378094398	9.63033507542743	0.444716067904788
2008011	5	8.74399772105197	0.00969921351968707	0.0323833674772375	0.0368456863004821	0.354820532980969	0.0597630126343989	0.771769157208626	1.92916366045824	10.764475838947	3.25693615902468	1.99796093718914	0.484284402276277	0.76940076779282	0.275993845664894	0.195960550526795	0.189730662372629	0.164493852119928	8.66592357282862	0.467119976640608
2008011	6	7.66669306646684	0.00503177205701917	0.0334707339349135	0.0329215802442567	0.379204593585257	0.0547444516060411	0.885046720660845	1.8064091438387	9.50327949147679	2.76921063379538	1.88122335837258	0.51976706909135	0.26082213232659	0.266313921176101	0.186976243763544	0.170179485980032	0.157218641359326	7.77697146462263	0.314381397279138
2008011	7	3.31916395715996	0.00422935819781787	0.0355218237095596	0.025302814190151	0.375870639406843	0.0469179761854254	0.948516762149942	1.69939185180362	8.26856757088487	2.96063206449288	1.97825278632593	0.559639117393157	0.136192777080553	0.317254089854202	0.186609380429504	0.137686710024112	0.142913154903309	6.96873556167002	0.183417300466505
2008011	8	1.84860790669167	0.00553078143408255	0.0402938672742778	0.0198288279116763	0.344690481509709	0.0381234096103393	0.721180947279417	1.63725934059965	6.99918149119027	3.39009093812362	1.80265495423577	0.55785555949994	0.252186205491576	0.301151492522134	0.194241398538625	0.108160371507056	0.121574924184485	6.07352707599296	0.136897400967034
2008011	9	1.29257383218441	0.00991194962790505	0.045039899812606	0.0132857959368971	0.291879654911433	0.0334061808042741	0.634033173001223	1.59591919341129	5.63836558076759	3.22204757310403	1.92250837260623	0.559736575925718	0.191816495134669	0.334272952621454	0.201420670634826	0.0957529608074919	0.122085094091498	4.91131733196173	0.10716294348202
2008011	10	2.0101695244689	0.025297469858709	0.0500730471599685	0.00870177840119188	0.23259611291565	0.0268338290177118	0.838207797555946	1.5361095637638	4.30164063071768	2.91486421697578	2.55263543797471	0.496794130050135	0.213887784172909	0.338706748836757	0.207818935734281	0.119939501774226	0.115856180603952	3.80981711845937	0.0770660702005307
2008011	11	1.94948637226527	0.0218899776520571	0.0473891582996277	0.00760264399965984	0.233470920454009	0.0270548403346534	1.51830315666906	1.54716357937218	3.13867405506571	2.69601601137561	2.81160930705576	0.439119463398005	0.387893801281347	0.310374296930905	0.220233714065416	0.10240190274847	0.117675982473673	3.1742569103218	0.0606985194822112
2008011	12	1.73062095819204	0.0167423404818588	0.0430151869175021	0.01018589165072	0.240553485800194	0.0279898379586748	1.46321500731362	1.58829879214361	2.35998702800998	2.4908680266699	2.8833771658447	0.381167779046935	0.608007001165952	0.305677706151442	0.235319966897575	0.0868018778555439	0.111616273751741	2.61569471351429	0.070292814433576
2008011	13	1.83046753645599	0.0153670675291893	0.0408012629390815	0.00998796510353768	0.24743906252082	0.0269503285163799	1.3640622022985	1.60471972805735	1.77902156442656	2.33290483547525	2.90900485543207	0.439500550375071	0.715323343919732	0.291658276314001	0.233285111502313	0.0731008906486653	0.109339465697838	2.2875624414732	0.0398623223244097
2008011	14	2.03831643314684	0.012319925235256	0.0327095779822543	0.00824069555781931	0.260349627916282	0.0269940293927519	1.488372436288	1.56664815932647	1.37738643310681	2.35564975878624	2.81559495525095	0.541568952300688	0.770247353431359	0.271664796366772	0.220831962792626	0.065528415526286	0.09725266888845	2.15835700008889	0.0310067138192751
2008011	15	2.211610447329	0.0102813125658099	0.025929794526813	0.00529450622325745	0.278911514552664	0.0264051499955577	1.28597081586609	1.4214113716957	1.20423039945199	2.54545051232225	2.5868697613962	0.62892156627341	0.999108007183223	0.256579306174466	0.163868003110634	0.0628899474245928	0.0892141165087635	2.05702264057854	0.156825669165811
2008011	16	1.05437935619764	0.00782046080368001	0.018999871380333	0.00558869259818915	0.315699085923703	0.0269992075963035	1.26569753411716	1.32453128655542	1.10121622062604	2.79193630827613	2.20101827992964	0.78947387608862	1.20233995239738	0.245251617125406	0.0748424385887339	0.0462519058753009	0.0834139043923067	1.92683901663175	0.781038144339869
2008011	17	1.1051408762137	0.00589202850676295	0.014165266850976	0.00815129128392235	0.248315911257785	0.0360590657391127	1.58775056742911	1.30448868969743	1.35392578353371	2.84291011265949	1.80502161175677	0.7258073605193	1.22070291269607	0.233311864166277	0.0488484398014236	0.0526788062171625	0.0838763164186494	1.78769325607503	1.26584016025841
2008011	18	3.62266651525505	0.00566600561887394	0.0114687560213426	0.0113184295039636	0.161094082744959	0.0456707377492172	1.90856971369383	1.16306391772749	1.14595058151356	2.56665024229746	1.46348580093857	0.68127777428964	1.21480559087593	0.221197439910842	0.0460964731016935	0.0618286633210424	0.0866626681194681	1.68437824419477	1.31426897684684
2008011	19	5.32546538184098	0.00620864063536456	0.00974864719462647	0.00947623916363773	0.138131353891723	0.0567462450596603	2.09615500796821	1.12449807659536	0.960058070900849	2.16431350138691	1.16055491862581	0.670651190731976	1.20945324464996	0.213022504088427	0.0543304156113541	0.0749759466827747	0.0941932889928132	1.67147904393213	1.38547634325952
2008011	20	5.46330115119396	0.00679060598079768	0.00880228354028361	0.00576642758855436	0.175538872874498	0.0767059980073156	1.89433438562828	1.18719075146941	1.05002367108907	1.86037802797085	1.06052957980812	0.669502687266349	1.14687869075936	0.212101473694396	0.0616066237292145	0.0842050889275773	0.0921570105847815	1.79804643335089	1.25226078748829
2008011	21	5.36995772747592	0.00745116813528047	0.00822097777869277	0.00452789203720172	0.190244828522619	0.0814979158749435	1.57549049931748	1.20004153180436	0.945392096244998	1.54884454498911	0.9601203311431	0.635633303159021	1.13927334363089	0.222718980354207	0.0658212103787359	0.0866321970540797	0.0853280606277036	1.94033192010651	0.833981756268499
2008011	22	4.73678250162829	0.0159822784223976	0.00885638185588706	0.0306501207595206	0.165773945273283	0.0669175185593903	1.09970024038562	1.1172914350984	0.857681960492993	1.12270248098231	0.851657967404765	0.551022497543365	1.14407360917301	0.245127612637542	0.06570549783206	0.0859270903011753	0.0851607486021797	2.04034213921361	0.518027800773995
2008011	23	3.27996310640921	0.034466508067406	0.00824525835965634	0.0469020727119259	0.161648113482118	0.0557017273186741	0.569407661699833	1.04131383946516	0.852293245166889	0.703688781444978	0.764259329069408	0.510870515198565	1.12068216285335	0.277557732677407	0.100281376731111	0.0874952377019441	0.0864408578384404	2.14969755541151	0.473742237386096
2008012	0	2.88283496906336	0.0340760567418139	0.0063082159119014	0.0537886498771274	0.241172570303352	0.0493647271662599	0.214505070841837	0.980644651685507	1.09497090547288	0.617736435430892	0.640449356395015	0.406666170214556	1.14996167644123	0.316563209190056	0.0900240472993901	0.0901834632295179	0.0916055293039855	2.13422068511105	0.525791910198788
2008012	1	2.57057003336016	0.0284771801217166	0.00620218979965519	0.0500677867942574	0.225503688221265	0.0465016158847619	0.13848222454035	1.0443034353969	1.76602750049247	0.995983108045192	0.501764767360843	0.339299256602846	1.09111046724911	0.363248957076249	0.0869292391616741	0.0934934225756374	0.0967952971625411	1.53040404875066	0.546279727352111
2008012	2	2.48327951110966	0.0216817015374489	0.00466582451592363	0.0435624499569236	0.159582025411383	0.0500200731431253	0.531580001510573	1.08314147837702	2.3412518518708	1.72175462990889	0.438410959314018	0.560718354868341	1.03115114191913	0.419332381349011	0.0859413505496216	0.0971761779024181	0.098813349106565	0.846393581212569	0.682720137909158
2008012	3	2.54754977569783	0.0148747360187012	0.0211728266342482	0.0389669467417921	0.161391865717732	0.0540064964207823	1.0256395613809	0.921447725070966	2.52100867018572	2.40428440547666	0.400425017239412	0.564010023802361	0.992401079757208	0.480476384035889	0.090434834634107	0.0997247904214144	0.095846857828215	0.805603462353996	1.07044788396299
2008012	4	2.49647978723626	0.0168513822044558	0.0389994312550428	0.0363033238806748	0.161119114184176	0.0545638188549059	1.13719171125166	0.849158574158261	2.01646218271797	2.75811684826141	0.37123415221908	0.326190704792197	0.964610728147632	0.532821068294153	0.0889713474782948	0.0979329988594655	0.0880984088807568	1.13178019318847	1.39353207342932
2008012	5	2.66350401520975	0.0870148372831267	0.0496306638113511	0.0334230255661434	0.170555834661651	0.0529215465953986	1.14362475861183	1.13772649684269	1.40347012327859	2.52175612542192	0.354148375755463	0.196466915099974	0.950488065472462	0.552426202610284	0.085239274561487	0.0898245175957634	0.0830929415709216	1.61895175893014	1.30138387088918
2008012	6	3.30993839491225	0.185970603914721	0.0723422991803918	0.0316395499853099	0.177215092120582	0.0507160421475825	1.0979145747862	1.40894444345382	1.16723145127329	2.18704307136614	0.333497946687132	0.224625866852152	0.918300510024628	0.555888948654371	0.0760500095462489	0.0788655491642396	0.0831170968512815	1.7576195420318	0.910944179525323
2008012	7	3.27477620126285	0.177419602591233	0.0944959718007405	0.0304359617011391	0.202369243131727	0.0425301027859253	1.01519026644454	1.31428499882465	1.15397937705425	2.17035994157828	0.316648264428801	0.244556082146711	0.903960352628559	0.56268888167137	0.0649806095635105	0.0683476008780371	0.0886645351413641	1.68036517768603	0.732651453662693
2008012	8	3.26292233217932	0.145248516891448	0.118642939190698	0.0291075156947629	0.263427296366127	0.0346130897958301	0.797956422400841	0.835043845792328	1.29280450587654	2.19102217202134	0.324401865723874	0.194484296815241	0.860063712942018	0.571336123280571	0.0534326824286343	0.0627198139234899	0.0935300502294531	1.62945628827568	0.876235880804108
2008012	9	4.06343114236164	0.210547220297349	0.138966041855761	0.0332237318890754	0.352266642358701	0.0337897674420202	1.18373407405378	0.719999949230025	1.60632749083214	2.18635605420378	0.37395629487746	0.16889418479816	0.825245250993311	0.618572677313876	0.0477101692703461	0.0587374877563966	0.0939754057780766	1.84232527101748	1.04889138591832
2008012	10	4.08188683807742	0.39911218902548	0.141428005092106	0.0969547604906538	0.369505679338184	0.0765797611561839	1.43735311063767	0.654122375880605	2.14236199698113	1.90338866351804	0.444084726669831	0.170403525628457	0.786980649115666	0.928005983451938	0.0459335379935709	0.0494476812901975	0.0965191089590339	2.19717602763778	1.09552380792046
2008012	11	2.79701171061238	0.473411893385439	0.16442467590638	0.10590253180252	0.376720607586502	0.130557428353404	1.19583252360088	0.74978947652017	1.96618921663805	1.48522944888892	0.439202967526287	0.153147480701932	0.770969419375121	1.15420718971993	0.0429095861533638	0.0480200813412699	0.0999488720961921	2.35701248445764	1.1227905812699
2008012	12	2.09483108407176	0.428559804533641	0.14657270784482	0.108624168703263	0.403522916556217	0.200378897975802	0.944828472966667	0.893421239387803	1.78881135579895	1.27379763553001	0.315413343789303	0.156854097073531	0.732373641027194	1.12551280305522	0.038042156995286	0.0470145839629749	0.103674630924646	2.11088346957135	1.07473275595039
2008012	13	2.76473340494529	0.309057680561598	0.125156363388389	0.226854921205111	0.566843630682521	0.262461631760155	0.891148548718678	2.12660209359324	1.73009201145779	1.02918027925316	0.308444831171996	0.199828490910941	0.721625265084333	1.04540310065703	0.0348384506276274	0.0475022159139007	0.107767450352889	1.82169473628642	1.05968284880511
2008012	14	3.3072768224173	0.25428658968697	0.126850753693481	0.287474595943351	0.572922619643455	0.234165174232391	0.55250223345684	2.52461472282286	1.59402841139094	1.07325990086585	0.489498905501838	0.255767348795507	0.717243111916584	1.04316520741859	0.0331765971548823	0.0494011789425902	0.12042653305412	1.77519952281602	1.07748645221796
2008012	15	3.68021142932453	0.213820417024209	0.159862973664824	0.242931203034076	0.760976672613008	0.179629073575494	0.215110241915606	3.70953185674695	1.45224003872091	1.14581060110019	0.954533458418849	0.287574792542233	0.722905758394774	1.01188316799447	0.0338259699542894	0.0503406215662185	0.148207512601326	1.7046845465491	1.03758271045407
2008012	16	3.38432781131949	0.243697850889845	0.11932025603412	0.188835916758942	1.29751702600483	0.149910656831818	0.342467947577126	3.25363865856347	1.19327679690517	1.40035571271203	1.05935382614069	0.305700659376912	0.767416537207511	1.02449429145708	0.0364697683815301	0.0492636333754123	0.197243483416929	1.59199812632154	1.10641500146395
2008012	17	2.26741735046545	0.310865661474097	0.104911439353098	0.215012581974799	1.96303645555486	0.135732662428731	0.620906101763331	2.62049602729066	0.392828966889855	1.70316843572006	1.10452936931997	0.228758409080007	0.736091136143786	0.929351935173982	0.0249556794417002	0.044913513273585	0.282012119226604	1.64483458919263	1.05037068086976
2008012	18	1.86346919053253	0.310088819993005	0.0994246715521485	0.196832762431758	2.17910458789985	0.132988213216638	0.983784572317066	2.03397319792405	0.458461905409899	1.27328922514892	1.21262747504945	0.149957824430889	0.679524076605663	0.819501701038734	0.0203064691349814	0.0430873383051341	0.407195811399533	1.43851531163232	1.32582928980541
2008012	19	2.11099907234127	0.274009920948941	0.0950504858844471	0.27518954054601	2.08237904463121	0.133749923879273	1.06574529854968	1.9107418203875	1.22200271385738	1.22129586544048	1.47645251040962	0.1136278707907	0.694462076969664	0.748211252426871	0.0191079175981083	0.0465232744070851	0.571315998576498	1.15812310695972	0.863981529150621
2008012	20	2.81020067654641	0.264019923198107	0.0896170099122734	0.430099081011926	1.94090802905695	0.12485992873585	0.973435552934177	1.63223298889643	1.85590421673397	1.3229193430511	1.58736269878285	0.121157759339959	0.724744010363499	0.693507373906128	0.019012671646964	0.0465539646209329	0.580373307528433	2.20944537435298	0.952188094827348
2008012	21	3.45404184560833	0.247717975079087	0.0870038175290565	0.514577126567554	1.81618573221801	0.119590841178178	1.00856181981812	1.51372773763053	1.91775754512365	1.72915704675569	1.37276564448711	0.156813958159201	0.923962750668138	0.64317358920822	0.0197589505995464	0.0439228006439166	0.964843535252816	2.12894890075754	0.961866513351295
2008012	22	3.42205398809143	0.193056105987354	0.0882343154668154	0.523556996969246	1.39737001575727	0.113075540295977	1.25864221095403	1.81717182470232	1.58174741498622	1.90757098735138	0.8303726266786	0.194651676110485	1.32527908867098	0.600704961876492	0.0209747002503911	0.0438808605275764	1.39145509698604	1.78193308050832	0.865790230148528
2008012	23	2.87233971071161	0.150600524481613	0.093227825910436	0.459261437881891	1.27351599334352	0.0910997451821427	1.47901388335606	2.23181428272302	1.46066260405718	1.99526011997892	0.752282835307822	0.209668826857916	1.39945248999338	0.553343023637959	0.0213276772920304	0.0484599370431877	1.6895364355593	2.0349253280619	0.758057705205852
2008013	0	2.52922365360898	0.139006675823237	0.0994046945184056	0.330418042113717	1.51331537972035	0.0898117383214217	1.40258555654066	2.49069067627444	1.41214415037971	2.02705050281544	0.900768437082278	0.194855983484664	1.28083839352839	0.502184361277833	0.0196071599956036	0.0567364746108315	1.66591298451393	2.21774288770357	0.611819375423161
2008013	1	1.96002310224686	0.14985860888846	0.102676234543716	0.229713393632822	1.71730187681574	0.0921378335876044	1.36224969030451	2.16499500039012	1.79458338248342	1.84352479567386	0.888265773603106	0.18253313477849	1.23445106110847	0.457702017198283	0.0201768870435467	0.0577593850081709	1.41520138159236	2.72104801782973	0.430898036377325
2008013	2	1.78537307119392	0.16222994667166	0.104298950647998	0.174229774843076	1.57061410137953	0.0962830911538823	1.19285604365771	1.55656252320999	2.13098810682041	1.57508669031572	0.94905757507849	0.203228797588378	1.23323968640958	0.416998135977359	0.0255665394336813	0.0571055282904316	1.27044441185744	2.9419821217312	0.313590882991697
2008013	3	1.81389292803253	0.155311042515283	0.106538532259852	0.142004584294304	1.30440924096069	0.0999068036517211	1.06328009918988	1.27353852196414	2.01420999323516	1.54294137140618	0.960613025571202	0.257650597146049	1.12311129689131	0.381783617991641	0.0365264587609177	0.0584064777468115	1.33452912811069	2.84223322092542	0.176140256860347
2008013	4	2.18567159290313	0.138228036053131	0.108817223960218	0.0821575445794766	1.05919517033188	0.114511474119931	0.99952129183851	1.1148626225296	1.91768944331988	1.55159229603833	0.822924619330272	0.27062765275968	0.983088512229243	0.351432480093344	0.0513481745858899	0.0606792376376431	1.14408844077418	2.74948439727811	0.14329706438801
2008013	5	2.75741805616162	0.139650740585059	0.112039464873997	0.07509047050744	0.807059934471408	0.117837766634395	1.02919662250106	1.04024932380403	1.78161101620147	1.35142368054264	0.56697645188571	0.358681511024216	0.845162749153761	0.327824175785127	0.0702356599242242	0.062847523113993	1.13149703797591	2.56977773706874	0.158369099593733
2008013	6	2.13809349878475	0.168963827441123	0.113654905661566	0.0776203744593619	0.661398138885682	0.123477144299592	0.8997572759329	0.904745100703439	1.44918422070068	1.50412174534664	0.657291371026051	0.467361392722379	0.704337416667449	0.314181181986579	0.0776883765608762	0.0656255580999834	1.39399733305634	2.33930405520296	0.162191456029123
2008013	7	1.98059316351843	0.183800433886194	0.194221624901987	0.0817602184497162	0.613844609420133	0.118606841280109	0.6299311249302	0.725451623403767	1.31518840909903	2.30969718831429	0.922325024938944	0.555213681849064	0.594427199971051	0.306088725308984	0.0770533163443997	0.0660431468073678	1.55724331945762	2.14792375089991	0.166216194561452
2008013	8	1.86904252164496	0.201952286161874	0.22662922787629	0.116506468245304	0.526698868878288	0.113996769524212	0.443603277571923	0.661463541119903	1.38267249707536	2.35214818415434	1.04928551954568	0.631219809273903	0.527749734715662	0.299711655095246	0.105923381087098	0.0632117007552057	1.5177471129724	1.94322122799247	0.197172145429664
2008013	9	1.84552084456341	0.328246077004431	0.220122942206492	0.252421226457022	0.38992235137803	0.108244638540796	0.657390131594979	0.591942849588111	1.47494383162826	2.14301394767864	1.13093818172584	0.612938011267287	0.647235655522171	0.293897662417046	0.176002897814578	0.0749470790383731	1.0787903824792	1.74669995554384	0.335883471961873
2008013	10	2.07782694550192	0.558246297107211	0.159707365528919	0.445371926599287	0.328145484222165	0.105436647263272	1.0577552047261	0.560191107979674	1.86621214975122	1.99660070844677	1.17798428083097	0.485148344709512	0.764862535936388	0.289941014441754	0.212688749059172	0.112207908658277	0.684604775851878	1.6444154584936	0.4461768144417
2008013	11	2.35212610186819	0.641103288669914	0.120831869673957	0.509679554122137	0.277494861688287	0.0966872022162153	0.824936194750835	0.504411465237665	2.40967485628208	1.92149271127995	1.2951353043226	0.538413007023531	0.964652651062799	0.290776257300202	0.230828834067904	0.115406520228711	0.600893726819233	1.78701417870239	0.437279811129704
2008013	12	2.48801404235894	0.506139778852907	0.115846196699953	0.570828748610298	0.287743993472092	0.137152292307226	0.691848898924964	0.479366766898388	2.28482545948749	1.94208719217696	1.28368844018457	0.475365494471003	1.47561898097497	0.294127139515219	0.25576026024685	0.114073739695494	0.534583053646801	2.21336712353809	0.389115968948147
2008013	13	2.48805810980331	0.384601480148871	0.120023745767188	0.587974801980416	0.405440467931741	0.120665663168133	0.619073619628019	0.439003590108884	2.09067448814885	2.32599277789673	1.14637119301352	0.418513424460714	1.153289653175	0.297448440499614	0.286459542917028	0.116955396716517	0.460725350458842	2.26595393127008	0.323841923859642
2008013	14	2.58662099864048	0.285938900136055	0.12001433692141	0.489202863031563	0.453865520689909	0.119639322658036	0.710661185689007	0.380914610535838	1.92202679416899	2.52091664248102	1.09848243247309	0.396211889609353	0.493445221786977	0.293623214213537	0.306128542407767	0.125297215611924	0.366536536591448	2.1841333812954	0.233924955085956
2008013	15	2.75916208695507	0.223271735183726	0.102894999460217	0.333469296777598	0.451903690093158	0.130985539844934	0.801197448979129	0.363212307374649	1.84786036251883	2.63186763692857	0.921539713744903	0.409712314495638	0.277720228606862	0.282254182414085	0.280669909162472	0.130930140369169	0.301832542443637	2.29414380103716	0.169141241547159
2008013	16	2.79643990211784	0.227148013912984	0.0883323155946518	0.278867069072551	0.411754887628458	0.137531955976234	0.914821316378954	0.345683578157196	1.77243123213467	2.57510265617023	0.810022117367844	0.370620521197598	0.625566368721754	0.270725607882661	0.252838626384747	0.125688910814378	0.232182231892978	2.26631707259586	0.126481375728806
2008013	17	2.78591730202895	0.232004202681238	0.0793512608932048	0.29480819287186	0.360292593889535	0.129508708598948	0.858070499031124	0.351527684265455	1.72372990025144	2.54210881740575	0.84130663391427	0.316993381075882	1.59012326345616	0.260761656461458	0.235794410905044	0.113680198026175	0.172263451184767	2.1428197620227	0.0938284016197928
2008013	18	2.77423211725318	0.239738532316879	0.0741806855105229	0.219086309988816	0.320252941356047	0.113313379985191	0.72851652057282	0.385651357536157	1.9385687047871	2.34248065906744	0.911129052237252	0.31752005484407	2.46477698433736	0.245684141722807	0.231743593448557	0.0992978795157296	0.166866489488423	2.33126004588054	0.0650980606735275
2008013	19	2.6209703989173	0.248095365132895	0.0700282149207816	0.15232949452641	0.328745913263071	0.103390954773795	0.678837148143081	0.43783144507247	2.1144191005275	2.14526790670999	0.998687383466216	0.325922720283757	3.14953185485739	0.261260722204908	0.230307424183321	0.0864551262680226	0.216396847339557	2.82983766998299	0.0603747487948542
2008013	20	2.48557290270848	0.243650961388522	0.0706042124357687	0.131702698027654	0.464025705272101	0.100137436194408	0.555806660074174	0.487755668075013	2.08896421119634	2.06244323216942	1.08855342420441	0.282000083728932	3.65133899672653	0.315235165386147	0.277488343620503	0.0709075998141266	0.185943985880692	3.18290024081105	0.0611903595858684
2008013	21	2.35060692875416	0.21379186225176	0.07394831039715	0.115312229887519	0.645346615867756	0.0981615795235763	0.426628961317549	0.541356713729742	2.08511681300397	1.86312846377344	1.11724109130864	0.231566088140872	3.33407605643843	0.406393617660103	0.296954371413017	0.0633965709589362	0.219581455907518	3.25394388119068	0.0696661830660701
2008013	22	2.18323122679533	0.178918888573252	0.0795775412690475	0.0970942577256069	0.494851515078634	0.087100878776033	0.3538141029542	0.569683197031565	2.00614036222454	1.61502559467433	1.07877528035152	0.229450157361653	2.62776052255132	0.448707208701404	0.303095818762904	0.0766344033863327	0.308201929924719	3.19529263532255	0.0895128067394274
2008013	23	1.89821255845071	0.145203773075551	0.0862075508939852	0.0878861927610639	0.398767483418056	0.0725601871598008	0.258197772995518	0.597542830534255	1.83936828150971	1.29872988813668	1.09338703532381	0.315082481820742	3.08810849019583	0.430206638005362	0.296685684693813	0.102821378956619	0.428208215111381	2.95607755948668	0.1235071187483
2008014	0	1.67776510414043	0.124834829860584	0.0908063834763329	0.0897473202934971	0.303296103826342	0.0607152556865886	0.185722029183096	0.606839413468012	1.77296639806512	0.889072194455656	1.14099003458462	0.384437688934143	3.36748105729407	0.630185910500653	0.263465150574904	0.11467160997252	0.440306810281929	2.73305079326947	0.159041897075843
2008014	1	1.68638252392306	0.109984731583524	0.0867868447719745	0.091519115254981	0.253545571804352	0.0544973642312038	0.174952591137325	0.587380796140334	1.68422602702664	0.575215322691997	1.05807532779951	0.303112990431183	3.2179265674194	0.988736544375878	0.220652891078847	0.113444182384382	0.402710194552307	2.46613709890056	0.142765235298193
2008014	2	1.76411995366627	0.0998018602661678	0.0829349310576944	0.0824216803662501	0.238309985356859	0.0543548069057136	0.212382379937555	0.536097000142896	1.68913459461123	0.507679177978776	0.964117517410819	0.240639829813236	3.07064319513238	1.21303127536924	0.144735931318965	0.122103010909505	0.439373674245553	2.31223206073875	0.120406487443196
2008014	3	1.9344353198535	0.0929318656935628	0.0812230525292806	0.0706324876179691	0.184987965317485	0.0598854152783503	0.238692677559127	0.485408103528745	1.65338328064223	0.582040983921307	1.03398173792524	0.256272652732465	3.27452700201331	1.31222783955947	0.117995042470437	0.128623635610349	0.462583787678475	2.38765989502232	0.0976074217348277
2008014	4	2.06064436562277	0.0858674558195273	0.0825672115055779	0.0727643987955417	0.143226847064034	0.0659378885271524	0.228866437372239	0.468626738635698	1.56364496849658	0.61988612904822	1.00370807543862	0.332343038154366	3.15485875241002	1.40994764386901	0.106285395661223	0.0860155162377049	0.315273634635725	2.37585465895097	0.0842922277191366
2008014	5	2.07146409586917	0.0807930593800942	0.08357664449636	0.0856339549608305	0.152368336840843	0.0733705633773509	0.250269058057687	0.462088365093887	1.63082740083779	0.59430603169349	1.12227163165446	0.408362545351223	2.48734955355751	1.351745169518	0.0945855365958257	0.0778242222920585	0.194938916751998	2.23453734706808	0.0766367429680338
2008014	6	2.16101766421688	0.0974834752680775	0.0831635257473512	0.0853142860900834	0.191896689358683	0.086108746017177	0.261598599703493	0.440518939797277	1.67217487180115	0.505601324378973	1.35515296133756	0.517672397372765	1.74638725565614	1.22693241037477	0.0849541129825162	0.0857358755198748	0.191036344675467	2.12735102794459	0.0770390717575147
2008014	7	2.21083676743049	0.0806382242109859	0.0813642564978396	0.0758644977691029	0.208387638829176	0.0943717066619498	0.235185481261823	0.408572992085587	1.67364621779642	0.397163541490471	1.51069531813652	0.731623871041155	1.50671865303512	1.26165595365734	0.0771254753556051	0.155306036529166	0.204025187765332	2.06268352112552	0.0765138637577335
2008014	8	2.37150986489974	0.0704250984090383	0.0757681608658555	0.0676779794764428	0.201359192549759	0.090144455034477	0.261250598175295	0.389267807996711	1.31730994425315	0.314657989855192	1.54778756933877	0.829357395488122	1.5263240971772	1.79865504845094	0.0706283707024337	0.170713180502755	0.301107979052253	1.8942869648396	0.0585322403041761
2008014	9	2.54943475024349	0.0605932519666769	0.0907813662239504	0.0776885022541191	0.189166816295725	0.0781345961854698	0.338116844292122	0.385388512688078	1.08086252095438	0.292761774033853	1.5912019670598	0.735337998642467	1.59079257257065	1.19467603921583	0.0676526110135665	0.187703080615847	0.35927428934694	1.50887442143572	0.033291805878665
2008014	10	2.54365250083629	0.0652712901694018	0.0818443882339498	0.083253668769398	0.19033450041627	0.110075499723975	0.297660771515478	0.396415622518709	0.953657485814228	0.353128996235003	1.63991176296762	0.716765530731781	1.63259080289504	0.876287971563194	0.129523476199595	0.185422640904976	0.248122322829073	1.05138333576912	0.0386168292140955
2008014	11	2.51117426019489	0.0598700955736323	0.109482567764786	0.0779107372755913	0.166766443564858	0.100469217184881	0.238081043875184	0.401307100324615	0.980997488015268	0.6211400337925	1.59440940129596	0.769920169293622	1.70903303904698	1.01317225611471	0.15632226694339	0.178311934800819	0.19611523999496	0.862970714511084	0.0912082344611581
2008014	12	2.64689303755739	0.0566193559331746	0.176269920864588	0.0690496882892003	0.152142338811594	0.0917864350415849	0.199498688856648	0.38929937524584	1.16018362873229	1.05722929897701	1.43325888939398	0.842138145530724	1.67582611894268	1.08585072549773	0.165917920767057	0.161902349765179	0.168393264809014	1.06661185685919	0.202968321388951
2008014	13	2.89382900357824	0.0506526030383283	0.240372477282504	0.0672986168522622	0.160921065734365	0.0816525542256174	0.248145493150245	0.377176249425009	1.46358616602958	1.31124716342282	1.06099797936465	0.89812444495557	1.57175970486285	1.14387336872315	0.162841237395211	0.12239851415704	0.147408691496418	1.53312979063777	0.26061694880754
2008014	14	3.24115684773945	0.0531260368635979	0.299919433568215	0.0747309936458168	0.162700487658693	0.0770048450154236	0.348631349122074	0.369293776074306	1.59986658659252	1.31276303649021	0.872990774277522	0.915661625133861	1.54362648640857	0.973759685822993	0.13822225649647	0.0971046981582462	0.13544956156804	2.1456755513293	0.30219819245482
2008014	15	3.06875835261143	0.0557459291402865	0.284546827752313	0.0764979962243994	0.164314009608423	0.0753341960494401	0.391429157988967	0.345828255157194	1.80602611525118	1.22623864540556	0.968230898118114	0.85793750007941	1.51833586479226	0.551629445634114	0.12591562400371	0.0900240753761203	0.135606987448821	2.33859270081787	0.258499271473918
2008014	16	3.17540093485387	0.0506029347129292	0.237657298370703	0.0618515134265036	0.178160461718174	0.0719911268876019	0.44616903896569	0.361919567087446	1.95082088065972	0.830625832473132	1.1654748599467	0.767383625686124	1.4824165510497	0.262711960658055	0.118440797818783	0.0779964537588654	0.13334205729755	2.44562524058913	0.225740489582491
2008014	17	3.65452601366853	0.0471742583825789	0.183989960513045	0.0497277268596313	0.19076284482917	0.0676755311989681	0.714739471476082	0.396616045989976	1.99091966269613	0.683044375526094	1.42126083637533	0.702739198335519	1.27264127445829	0.145585292791342	0.113858601874861	0.0791461172473417	0.130563321785031	2.91125752488315	0.215539640995121
2008014	18	4.0215083609435	0.0480127944649325	0.155732904305762	0.0535649440041487	0.178336688729676	0.0761305061538634	0.982656395342362	0.399813036269883	2.12669546956801	0.707184120970119	1.69648539240127	0.608171702784597	1.08648357243979	0.243635092507786	0.10939436174888	0.0963496468906516	0.128261253245213	3.05173393462806	0.279064768029324
2008014	19	3.98286125158804	0.0560464324373154	0.14303919117898	0.0560210629001811	0.167306564297432	0.0890297079641362	0.690155255942645	0.445765657600589	2.17878772966262	0.873842564522938	2.04437681985807	0.508474986102792	1.34652724987449	0.20108805573242	0.103273737698	0.11280701891465	0.128904299883736	3.18465060878294	0.430765532229445
2008014	20	4.00393503201179	0.0711217316090219	0.124233043228595	0.0590323591642346	0.178281330629347	0.0941908598395161	0.715265004193509	0.487664910694357	2.24540698545907	1.18373568825116	2.07337802041617	0.38677214504565	1.15615907773901	0.440568253788627	0.0943964529830124	0.115112890397825	0.127630340855611	3.32531772068449	0.702162830889757
2008014	21	3.84089269805847	0.0790272262854549	0.115062730843833	0.060984377388107	0.196558618654996	0.09431961551746	0.982729085676025	0.493492321776635	2.33162131617652	1.34775783332825	1.84976213824133	0.292659191527225	0.764696798178658	1.09848381824631	0.0853341686561786	0.108485099193846	0.124823078433861	3.40842058303943	1.04634435984883
2008014	22	3.99912355274618	0.07308899063106	0.0899872163718173	0.0580458112508452	0.219486037724665	0.0717119058247188	1.43233054500769	0.480023566781813	2.40002356506617	2.87597189717653	1.50293070332884	0.279940985282268	2.28855727417514	0.956284113693404	0.0793951747168012	0.10104339647267	0.124699498661839	3.41213243948538	1.54213113803101
2008014	23	5.10562146149449	0.0686747935899651	0.0802604459535143	0.0606882890166566	0.235126382281418	0.0771082143455026	1.74812737576145	0.505517690945344	2.42260909583443	3.1146112443851	1.35641255275442	0.289824432797344	2.32443371196732	0.590875676690458	0.0758235019960725	0.0966846541082957	0.126885952187741	3.21511689084125	2.38172206582861
2008015	0	6.05977352478606	0.0605466382054752	0.074490342175237	0.0574176017908618	0.234768791341082	0.0937820822432723	1.95132600788187	0.490526799937082	2.36326823754323	4.10788200945233	1.39582210495692	0.317632108322341	2.55032796779913	0.276356486007548	0.073755934917419	0.0947651169284241	0.133110003947022	3.22688880485606	2.73329165440465
2008015	1	6.23210683468515	0.0532608615778436	0.0625843453485463	0.0528689716276103	0.231936044598093	0.0903983205354133	2.34202592332919	0.459261739119204	2.6725288053017	4.03305118994568	1.43874455345392	0.340361575863234	2.27878221776595	0.239419338492224	0.0734146517342755	0.0935090586535652	0.140427364916689	2.9671638838557	2.99692765315775
2008015	2	5.43337728931468	0.0474799071430869	0.0509305022636902	0.0491440737323147	0.226032157361715	0.0823887750669506	2.46542323395753	0.454669274987226	2.9363650349229	2.85325784806455	1.38946315759415	0.34323372996463	1.53476672785114	0.711951524604374	0.0757618153398655	0.0895560797492448	0.147233962634825	3.37964435390026	2.86238939271037
2008015	3	3.88870280797976	0.0529859671462124	0.0441512715322827	0.0476446949119348	0.20653324477673	0.0832622634196159	2.26677607562568	0.519803831193546	2.9780611011154	2.28809422726126	1.3128521455007	0.345038902765582	1.16312992608826	0.983810687665016	0.0792385471309867	0.0838623995427974	0.151032970191923	3.54612272433863	1.94159155254258
2008015	4	2.97787143995575	0.0615261523522365	0.0518994089741153	0.0444269372489956	0.19558637081655	0.0876642606596945	1.83446700035998	0.793526217063875	3.64438085384252	1.74735209572546	1.29418507169916	0.366427399799592	0.400212680051549	0.973263451297055	0.0804117047487811	0.0801659668824927	0.15157417118606	4.21096323893539	0.796986443386149
2008015	5	3.45172405694701	0.058300552866024	0.0485118564550757	0.0408430173100592	0.19772784920558	0.0637300176537418	1.2209003935924	0.97143216788945	3.86103198605077	0.970071138356189	1.45037558977405	0.366155035032285	0.359676867247745	0.940861501781508	0.0779722232975885	0.0783256316412681	0.147436426102784	4.653774285237	0.680136052206458
2008015	6	4.09571184967152	0.0545191299249167	0.0451456163127957	0.0380697107256364	0.240413104528346	0.0435723385009165	0.470903445636353	1.00191512724757	3.85913468718855	3.13191439654997	1.367977965754	0.368458070154381	0.616494341728617	1.18086482621623	0.0727925654071992	0.0754431099244916	0.139651450171002	4.73983188217264	0.901412340416043
2008015	7	4.297405127376	0.0771984085043979	0.0413956629997633	0.0386779499865588	0.315864736197828	0.0382337949455988	1.23861373063446	1.20610317449856	3.59709659997945	4.33044771262017	1.26011837984922	0.345645712813849	0.828240517485225	1.15041006913985	0.067673001770016	0.0707524176991148	0.12679344458228	4.52715204047349	1.33087509126998
2008015	8	5.09826713178408	0.14545376729952	0.0444990417977181	0.0399861642874323	0.405437857693288	0.0384022175070249	2.32387261232015	1.47627059811566	3.03273230074057	3.57556862499486	1.2403640496822	0.309368878761305	1.03532258921097	0.752741397273418	0.06511570784672	0.0789774903199898	0.121126027420942	3.58875483237845	1.209302000902
2008015	9	5.0169489633794	0.294013268114221	0.0860410894448567	0.0593010563396059	0.471593057120969	0.0408444266690015	2.41031470613577	1.55606930634743	3.03380015888315	3.20735297050108	1.188554545596	0.281455701310216	0.615980375768102	0.297958966886634	0.0715761302402426	0.110477934183995	0.11601549988554	3.1015870663569	0.546777383529956
2008015	10	3.11371549543247	0.313229291211593	0.203042287294619	0.0764897508083481	0.496091984057567	0.0493302396579163	2.63452915327489	1.06627726572774	2.77979243640871	3.08123273508204	1.18178786502605	0.249671378554874	0.274308330257916	0.248222265330545	0.142836479804161	0.119380214923458	0.114646615780147	3.68572963830195	0.183710450437515
2008015	11	3.5164044332526	0.301628503144767	0.216788737290111	0.139664197385601	0.444369454222919	0.0542670422109598	2.93896179211819	0.773753712497777	2.9971300963444	4.25572450268827	1.19094110027	0.233786968138298	0.312547601333888	0.434681863213677	0.179826829362125	0.111324372422992	0.112096830261394	3.39546541578027	0.345397006856116
2008015	12	3.2573975534978	0.262474770826143	0.174014650814525	0.104575624785653	0.430441708571506	0.070697015098505	2.21592563530893	0.838300086337674	3.87714081059757	2.95265568699763	1.21898670438613	0.236119527212732	0.94756203024569	0.586567363821621	0.168423422066417	0.0948303331132637	0.113039103115894	3.28664788965937	0.579587906799318
2008015	13	2.85498264190156	0.20509143067248	0.162858954790914	0.0885666595365145	0.383023674695313	0.0908715274333958	1.11459902963905	0.72710957670182	3.6556775213832	2.56726305968176	1.21964644095434	0.236980948552598	1.84167420589449	0.48637052282263	0.159031801794655	0.0832445978533615	0.105989866438156	3.75718755929353	0.586422073250644
2008015	14	3.05527593068719	0.226748074186412	0.156274838040615	0.0871369665622158	0.299125487001111	0.11706828547393	1.08932574665504	0.754697044267509	2.43853626833431	2.0383644098898	1.19184324075545	0.244690032038678	1.95506130499653	0.307285790353473	0.159383210083432	0.0786753992833247	0.101807293916366	3.92182408100928	0.386694782144018
2008015	15	3.53610253179361	0.121292296415565	0.119300116794773	0.0746072595324318	0.287416778795725	0.124036629841409	0.605227973644434	0.865256217498784	2.43927438630219	0.787468109381296	1.13752226399843	0.26689575839155	2.04927133083229	0.112041952980297	0.180504920373715	0.078639490293777	0.100385693280344	3.23984864877481	0.247929490884589
2008015	16	3.77573154580785	0.103081155462462	0.0968238799965657	0.100793702899333	0.246401572768019	0.0891362205642892	0.244717301555979	0.831710941415519	2.3983741886934	0.606451761615121	1.15751795019453	0.30391045893943	1.02958139075886	0.0610956811822869	0.138173448525703	0.0704664492442644	0.100401587416744	3.20921815226702	0.180523735142599
2008015	17	3.71274288598998	0.106845361631782	0.0811269650030412	0.116725923263662	0.277606882504656	0.0661420355869139	0.200701585556689	1.01733634115685	2.24153751555202	1.00623729761005	1.18326809535796	0.34890028274882	1.07748567312603	0.165167195338331	0.105441937727621	0.0666427905442054	0.126647251631286	3.08561589420391	0.0865092954038746
2008015	18	3.97016037360964	0.105539958574466	0.0682924082942628	0.0999380434734983	0.278847460048609	0.0752842601871885	0.350610595005167	0.99199394480583	1.84577164810403	1.17299012091323	1.21173970650121	0.397355028081148	1.0986805917053	0.864649618852101	0.0733878816534465	0.0671497625617759	0.146639494978609	2.56693544319379	0.0337434575634645
2008015	19	4.28521875417809	0.0754701966167019	0.0515329153775514	0.0728295286109192	0.266873075166686	0.103757579120772	0.381579438520701	0.973687296502048	2.07230340039187	3.52285832948096	1.28068260199117	0.420057768420242	1.0004003198188	1.38953272500496	0.0563797546204809	0.0669872429020072	0.143698326461179	2.0220223845787	0.0328509637076211
2008015	20	4.14731022005833	0.0639576354182445	0.0452419471136499	0.0484647496055489	0.256867199272223	0.0982610735336616	0.520535887155244	0.909780884869449	2.73088378510926	4.83928714220349	1.33061432736253	0.442139625293042	1.068389313029	1.04065226123739	0.0475536623170449	0.0577561109390088	0.101348518470415	2.47671455131767	0.0774491559295359
2008015	21	3.91893039072641	0.0590149043703071	0.045117676084588	0.0479413524494895	0.257232697283541	0.0880495836074723	0.725629826394594	0.789699535217539	2.90000872658027	4.20509739401838	1.36660879687827	0.45609183617958	0.724896940147364	0.47365325512091	0.0440842060352668	0.0548842284564975	0.103304208695899	2.77457706094903	0.075419471752059
2008015	22	3.29118069257702	0.0541945002002856	0.0391563303724759	0.0561577732942526	0.243770407127007	0.0875334136627282	0.765131920261608	0.69203718863101	3.47255237895891	3.71278243208571	1.43039282227011	0.445157725175659	0.241305174382753	0.297821523540281	0.0453498976394748	0.0550017720124934	0.12452062742873	2.86183650870342	0.190582959569413
2008015	23	2.76711521621175	0.0434777469897047	0.0388803853500452	0.0565049848708136	0.240654440484678	0.105838181216258	0.956391980174334	0.602186267726861	3.23552401166667	2.58540653113753	1.46077318870185	0.421719992210485	0.685305324685602	0.238330655810116	0.0550981364691018	0.0555273395285747	0.150117528995206	2.92684568208127	0.596702842955204
2008016	0	2.58487704054725	0.0253436632584531	0.0500960716669709	0.056138373989746	0.229005162522083	0.102013693022124	0.782909491522771	0.593789983771525	3.08315575944909	1.3702247151653	1.22127172153688	0.386326332000137	1.61839038571622	0.225971014669122	0.0719487616404506	0.0533177745142353	0.173867605490387	2.81359107419078	0.724079523858577
2008016	1	2.98086266343617	0.0116833073086285	0.0519724890470411	0.0579758882032092	0.220467413714916	0.10504697130572	0.573274923507032	0.562169945555253	2.7987108644436	1.08669573200425	1.30932355186828	0.366733860127063	1.75459688605827	0.197852687509059	0.115011172021685	0.0450233067195027	0.150888470515756	2.7934299802298	0.908854552068135
2008016	2	4.56477489248808	0.0120868867538715	0.0429192032726271	0.0458903258790704	0.212919055065582	0.0933666876989657	0.269004744878114	0.554982881858157	2.64596943199011	1.45402398793102	2.01151801497	0.369075705132729	1.20463543238938	0.143469248412656	0.0630796905212777	0.0377452116824928	0.144467852471176	2.9005412569893	1.14397798482386
2008016	3	4.5743264929919	0.0112732510865804	0.0483770364833861	0.0250214890289293	0.199940772953288	0.0836141166143447	0.351864039422766	0.614823772179471	2.61013213732492	1.21179273254212	2.48521868787359	0.366474816510209	0.904646897270997	0.098785684617771	0.0597814038214436	0.0420630750285128	0.144472764662333	2.98750593242937	0.898243910196324
2008016	4	4.11452781093276	0.0099874713828924	0.0569019323564702	0.0150256393883183	0.191068536633807	0.0648056606034566	0.855506958589035	0.669487874263694	2.65378644596025	3.66269371751133	2.83634632877101	0.348238848382334	0.477986523276774	0.0661195241778885	0.0572665471934189	0.0459726860312663	0.137365782258843	3.16277599542236	0.877842005551007
2008016	5	4.51437992068629	0.0105519444799864	0.0644086653287103	0.0106351157497169	0.183327852007455	0.0396325244252184	1.79444983745559	0.664386134482795	2.74443436305436	2.59359693825405	3.01042125566772	0.3137184701652	0.297763975315846	0.0527332469768494	0.0580099532094688	0.0423995319323517	0.13194624137088	3.1679438222997	1.22993265164217
2008016	6	5.5773031084002	0.0264478675030875	0.0797287652191901	0.00747069583846819	0.183125758054818	0.0149682317476909	1.42027750182747	0.646680952391043	3.01403665395218	2.66023684540633	3.07734556027983	0.319995173805613	0.207676238009239	0.0644939566998107	0.0607823996004247	0.0488304598342836	0.115565307720879	3.2153066894483	1.24729319532127
2008016	7	5.19508542250812	0.0514163452344289	0.0827593091426294	0.00551356720941739	0.168790471127158	0.00778330360483688	1.04434297120175	0.724332904802015	3.10977281298588	3.73761356580972	3.14249084264427	0.361845247945981	0.507219813487007	0.0767905725060444	0.0625119461734888	0.0482504156517749	0.112513356854178	3.56114173084598	1.19553671844813
2008016	8	5.57791020371984	0.0628082820439365	0.0661653837665215	0.00668449511288457	0.170274778280162	0.00697465637172102	1.72182326824921	0.797095557485342	2.93314542872932	2.46812636151999	3.22876819712419	0.38933830394299	0.961136593599061	0.0751168539277713	0.060532069477996	0.0490524804628578	0.0944293148363965	3.5133273168104	1.11760717352141
2008016	9	6.05821416876685	0.110459562020578	0.055678180057347	0.00955091078494703	0.185604389373958	0.00679940743029546	2.38452960992743	0.75976359841808	2.79502920866648	5.01508398812292	3.30590779567202	0.416331389301257	2.81245688280215	0.0641588277432948	0.0737739087670239	0.0553639513778426	0.0937709910534215	3.31145148786359	1.02315854334771
2008016	10	6.10448283449151	0.264667237873126	0.0504078058282604	0.0119838332409821	0.217618115706995	0.00595257274892289	3.13246577522001	0.693154410623967	2.77027538680168	5.88613927946462	3.33699152866515	0.419107841541931	2.2091409879646	0.0323510149184652	0.134731165524713	0.0614044759555104	0.0890771683022988	3.12547717466595	0.989616661358835
2008016	11	5.7608273279026	0.293966175245163	0.0699402243374552	0.0148250216106939	0.249557169978608	0.00989648824841095	3.54281490779127	0.573869410267988	2.9604261605327	6.05284473697126	3.20245332877515	0.43573309299699	0.815655699050615	0.0288920432624929	0.12233516091717	0.0460478442436812	0.085351070760762	3.29060833657464	0.988812464633349
2008016	12	5.25282662205673	0.263464090251309	0.11292036145865	0.0259930459199882	0.273138507882656	0.0223159644632322	3.57080355875564	0.613922025602031	3.27190915379158	5.81977830758236	2.90706911565759	0.450366351453582	1.69677367810238	0.212237485418684	0.106793980311795	0.0375415431274032	0.078523561400327	3.62753094903326	0.777282400080718
2008016	13	5.09073458233395	0.194113047018006	0.149892499285545	0.0785128037688328	0.302173478810162	0.0832497322013694	3.8658636122237	0.817696536598241	3.65813738416442	5.50187511991626	2.83436747723893	0.438598597662492	2.32329724909123	0.0696698955097173	0.0991728012757968	0.0321151860609104	0.0734331571864461	4.0901200727536	0.724473844012071
2008016	14	5.12971581356742	0.155765501632085	0.148745450064858	0.140197349078665	0.341935784752474	0.137294602350045	3.56636616048593	0.847469595885527	3.74573582874094	5.70758469324836	2.8917556991214	0.428456403885589	2.95167906069772	0.0336391981529156	0.0965786002811903	0.0325465983423738	0.0701969108802551	4.11420847665884	0.718268522699872
2008016	15	4.74519823759547	0.13791800292375	0.0996050997363425	0.151586464618701	0.331035211759799	0.156458134362526	3.16928625088017	0.801475408457346	3.72622830158897	5.97478248958109	2.81153772985374	0.430100043916456	2.80671438350793	0.01942829699688	0.0938464382578306	0.0391527705279952	0.0694044596894463	4.23439910211663	0.570261982079562
2008016	16	4.8719779508694	0.120085454821532	0.0428487575264958	0.122682378373945	0.322122292599453	0.133727710834514	3.48744886586165	0.76581834885693	3.55381043056804	7.04212421627069	2.74414139118968	0.422384163591789	3.63681876859145	0.0176981432858334	0.0811252375099739	0.0253286929167896	0.064163977844264	4.32403206348758	0.309139943250648
2008016	17	5.04663124869623	0.105777195759161	0.0248255094457364	0.0981066663085139	0.374722991970393	0.102788514152554	3.53068250733129	0.828698386167618	3.47548150806295	9.72411352744561	2.66923014014345	0.394807077898043	3.76537967326018	0.0471874528989034	0.0749796758480693	0.022670862973183	0.0613963633702748	4.1047227575076	0.174615257366452
2008016	18	4.83167203737826	0.0866628754670771	0.0262594183338072	0.0863301691894111	0.397266948592204	0.0731504707082841	3.8967317574844	0.796591690013774	3.81148829289593	8.58742517643326	2.49891074225652	0.366702123630207	2.46888895917043	0.0966242483601439	0.077160412743183	0.0208998502893206	0.0619379055574836	4.25534923002839	0.122259148037502
2008016	19	5.187045979123	0.0714381789209651	0.0318895745694031	0.0798722455540724	0.398192095145642	0.0454412061677292	5.4187750643867	0.66482440042506	4.35151621824318	2.79353779921781	2.3924063307446	0.348888100603045	1.07949181655781	0.158206335174812	0.0876019711432749	0.0198231103085776	0.0709313513821595	4.6213185996705	0.116014840241515
2008016	20	6.81287945817178	0.0839110724858987	0.0337910916146407	0.085941105903441	0.378283016511904	0.030201913542877	5.77279920081568	0.650489399502885	4.98777571883003	2.04006073308133	2.24918093334699	0.352019404342152	0.186424944641878	0.187106802221491	0.0897963622935598	0.0185687102131466	0.0835533147260246	5.24315210855993	0.115773946802427
2008016	21	8.25494136235813	0.105673628350113	0.0868865427802819	0.102133964746192	0.327672875803487	0.0263971054038964	2.80565374325344	0.765455192025808	5.87747197263112	3.69121950519769	1.95298248171433	0.326577243452576	0.173045158510452	0.181450161996534	0.0842393905000074	0.0173108290656343	0.111350822938005	7.42886807165324	0.10571615722561
2008016	22	8.33656575436555	0.125908759526526	0.0714497617490607	0.102421908546188	0.306259656564484	0.0259379193540049	2.08917521760525	0.912396808744265	7.46875473914614	6.50288423893157	1.57816960719888	0.279195790053595	0.101796003652286	0.338841185960292	0.074755592593857	0.0172417969714838	0.133229988435281	7.87122624836754	0.0941232317007296
2008016	23	7.64767912079175	0.16174975129008	0.0292365521982384	0.10559333316324	0.274305312122839	0.0239769871929195	3.85204183867604	0.977334124981818	7.61195514750345	5.59978423021846	1.40673353937426	0.280094565883313	0.170535781871278	0.451482267936318	0.0674585326834952	0.0207557672096575	0.143796133458462	6.0317513253306	0.0844701375930431
2008017	0	6.25874945306756	0.153183389409173	0.0465349597790859	0.104277219726179	0.261097675518875	0.0225738921739841	4.31445431156407	0.893832216164356	6.44559958380826	5.82422847644827	1.52127614489683	0.280944204079839	0.228394460666732	0.621272596027462	0.0570300098403408	0.0292220027780577	0.15198278924415	4.61168762691402	0.0753200883371074
2008017	1	5.60704551868994	0.115050407381137	0.0966453496554814	0.104426212604442	0.269205085734547	0.02409347251429	3.69331617699703	0.914645736914271	5.83256158884338	6.19201841171128	1.38680804167385	0.284858016567719	0.366465919624363	0.84521932154039	0.0571581404910725	0.0359286746245582	0.154833334974397	5.05932414758753	0.0673238434643775
2008017	2	5.18161416261108	0.0974823259132224	0.186194191650339	0.0957619205729602	0.289203609739733	0.0325527616936624	4.16759078159897	1.10270969639697	4.68122117497148	6.0184024988183	1.18612761384135	0.311343997818923	0.362896301902958	0.903509443769575	0.0640516232942007	0.0377146874953051	0.152220924382488	4.90230713023551	0.0778805805373409
2008017	3	4.98352072459033	0.0783693429554506	0.215061018211646	0.0796294992230702	0.314533136610267	0.0426544657211852	4.32044244660944	1.68182136214251	4.20084360616543	5.4660277630421	1.0465766255887	0.343335458955084	0.549600841223541	0.7892616115445	0.0634945066513649	0.0372729999448048	0.151796158388354	4.87020103881019	0.16198889976088
2008017	4	4.70170151944349	0.052402405020819	0.20275463422546	0.0638890894122771	0.353319076906742	0.0461337762578044	4.06826917735521	2.31539615017948	4.34925524574723	4.70743051851951	0.866369614929674	0.358703135303805	1.20035571483152	0.659324111396985	0.0603059908800971	0.0354504727169042	0.163901095793228	4.84860886521653	0.323933824123299
2008017	5	4.31978682151816	0.0369402294893516	0.202365929312414	0.0322919730798962	0.384754588164218	0.0457132550089225	3.60818402265107	2.51718390535355	4.57695472814243	3.95319682461808	0.846818304493789	0.348593369923838	1.8318913253	0.583558981006504	0.0562384321725609	0.0339831585707796	0.190134987736041	5.25346745838388	0.302648568443417
2008017	6	3.90383612646178	0.0504007054359793	0.0961888881593946	0.0253338577203328	0.37501826264324	0.0450340509786384	3.09921797902229	2.38129741980776	4.61664047640958	3.26480464038946	1.02727143310063	0.383766952590047	2.54737109361792	0.528036610332638	0.0513593671213655	0.0336816288448762	0.203588873986898	5.63217807615023	0.214169119987331
2008017	7	3.77510228163977	0.06311219400698	0.0678436720500121	0.0268894355811301	0.327676971857134	0.0463819803663829	2.58195585283604	2.26091654350068	4.16790270642435	3.18195577869745	1.22746788353434	0.428509290890219	2.87929274426976	0.474072851774443	0.0502383039750288	0.0339990407252876	0.196158842881382	5.28587178553451	0.187126258184923
2008017	8	3.65419684394126	0.0688948208130234	0.123594141134828	0.0334249673298046	0.290036937168499	0.0525387512330048	2.10676276682288	1.85437688751317	3.63504976701908	3.53760498802334	1.51830164569344	0.430831560239354	2.73579888005705	0.432058276557744	0.05347000775641	0.0345155958841429	0.185443378744279	5.01031871625725	0.18527811835152
2008017	9	3.46448593275871	0.0927304084477275	0.160914289613385	0.0420657256538679	0.271911624887079	0.0695899646158423	1.871456231376	1.46974756904314	3.00908407525478	2.89158395176628	1.8322278183854	0.426764564164821	2.38509218870855	0.433445032162875	0.059175922700058	0.0351309216826042	0.184142421562874	4.42950749496293	0.197178083366458
2008017	10	3.35602559184436	0.1199324671056	0.182823582924698	0.0473786794065653	0.235715140086508	0.0661737906503152	1.9692017453949	1.12072117591994	2.67951469569801	2.48860787875739	1.92632158917605	0.411873915800319	2.16156153753384	0.400618221027365	0.0903058722426614	0.0363808397492078	0.198780311892472	3.50310905386044	0.450753069067227
2008017	11	3.24099282217671	0.0962173075732989	0.248027530808152	0.0485273376161046	0.255584649521636	0.0466025900925998	1.88839874404763	0.936273106361359	2.52860685612437	2.41038972538897	1.82717646472741	0.384999540152742	2.05477128285989	0.350415432501908	0.095280670277639	0.0410754056236061	0.202035398333598	3.09267733063023	0.575994393638844
2008017	12	3.21211940574344	0.0920089729779465	0.333709158664458	0.0514306015501605	0.254257044375973	0.0259821999734791	1.81782238059219	0.837552368298832	2.44818548751253	2.32534049024502	1.75112395040706	0.364162959500703	1.90322150219318	0.324707883378023	0.0931826793211965	0.0434892701945685	0.191932766845401	2.78535870508644	0.415383435574071
2008017	13	2.26486868231978	0.0881284098562005	0.329733776131845	0.0559565147950715	0.212304329897827	0.0169766080269806	1.57862671557157	0.721291252830659	2.36195186930814	2.16182391444194	1.66912760447919	0.361809545897022	1.65218699696738	0.316394338968384	0.094024276364429	0.0396672132996155	0.191378914589572	2.51269906537026	0.483383807195133
2008017	14	1.3910491654755	0.16583240952738	0.321759883897523	0.0503080492608681	0.203442233457532	0.0292048902069412	1.44494451269991	0.524410730709835	2.41435244993897	1.94614265666999	1.51017482086321	0.369948885267031	1.52495486155192	0.310303326856311	0.0962312102027947	0.0430489156147585	0.216276050934207	2.34244201040392	0.488040877946138
2008017	15	1.29030328128859	0.139437495982765	0.428487177287556	0.041457659979974	0.183624092189668	0.0720194297600884	1.28251212825337	0.362968848992418	2.37281669757287	1.60215291036347	1.3217990835095	0.378126698526921	1.36971425731842	0.314162552655673	0.0994885408219105	0.0414368820194653	0.184784101080675	2.16874681612994	0.605625172340713
2008017	16	1.50460434529035	0.0865474460748533	0.544394928506898	0.0402681801200287	0.185426841030869	0.098333550982202	1.22767750607792	0.401667643091097	2.29577843473244	1.16460295385039	1.18493114782491	0.378560603688493	1.15189254606436	0.341837739590042	0.0943408584358445	0.0338302643403881	0.142349502493997	2.18339713422254	0.10202347942332
2008017	17	1.74106520779341	0.107059136985279	0.471084446408123	0.0599013881660515	0.188003199228158	0.0825534130097896	0.830249427047534	0.325764044555581	2.00278060505283	0.612542758613519	1.06427230872986	0.362259021076243	0.986154568664024	0.361137375406229	0.0870505529836118	0.0306082719594491	0.124936842082235	2.24916416597978	0.267143648320164
2008017	18	1.79061576261754	0.132095227284719	0.394060557795525	0.0924438310375244	0.175088946192317	0.0613041315524697	0.30847608813742	0.28799646534707	1.33239194894339	0.307293317275148	1.08607880555663	0.334276730807026	1.24537980240845	0.364269600985152	0.0890763703249126	0.0282277801141016	0.118183896846761	2.25531609757505	1.65148923167903
2008017	19	1.86423092145413	0.120138864792292	0.406450563542562	0.0896366603801079	0.192994808620079	0.0424644591580886	0.231969356702035	0.346455718565598	0.892577909954214	0.360773545865639	1.0291153460768	0.305731235256591	1.5749591778854	0.376256332856038	0.0990610986077387	0.0280633249697047	0.114280990975639	2.0558278242333	2.39895140106068
2008017	20	1.67701577229212	0.105311615113567	0.32707695505357	0.0990465897843575	0.17882287303893	0.0301210770320886	0.252008510140744	0.377715400860673	1.06214604428537	0.561238700319822	0.930830647064277	0.2998419149622	1.72671591378159	0.411266383489595	0.109357542406713	0.027229575403972	0.105531121646595	1.1870441639128	1.9315957896685
2008017	21	1.46332529038947	0.0666969815036804	0.148705193487829	0.10172958785852	0.167343343159645	0.0536721799422779	0.25700561946002	0.383333514330459	0.985390701200471	0.527498015616442	0.839343017740076	0.311956163179662	1.61870044418617	0.465582964195796	0.116194696666928	0.0257607108096969	0.1045712469159	0.738138219685442	1.20104911873749
2008017	22	1.52960829087201	0.076916517862951	0.0607007434717669	0.0460677930022755	0.166284615125635	0.105853562328048	0.221227860490265	0.36833905428339	0.7199305655593	0.476588532374469	0.776246768527724	0.31614685623977	1.29899181497694	0.523426471891986	0.121353460161102	0.0244400833202715	0.101502427626851	1.17142473814039	2.61544584763643
2008017	23	1.14700983148827	0.0783098832454263	0.0385304354744933	0.0468978589080179	0.16417980395126	0.146800496514558	0.209617497953454	0.333804937462619	0.808170496178452	0.399757006246073	0.723745443545061	0.300580471052219	1.04487392591173	0.459332153012615	0.125112196904555	0.0258231936300349	0.0882575728998296	1.16756163009225	2.87158088144559
2008018	0	2.22125202959168	0.123601817134326	0.0383958331454402	0.0646861356533856	0.15598364887322	0.133527022830828	0.222564955772437	0.29946765352231	0.827265525893654	0.306896257149791	0.686472861298982	0.278724850481449	0.77389825130918	0.414526784797339	0.126478133628137	0.0294735991083699	0.0820210709484337	0.903804465329138	2.66122257175503
2008018	1	2.8954436593779	0.436857804591405	0.0430566466569497	0.0657495552590041	0.148947010798663	0.0987819327410907	0.193185705064774	0.314650027009805	0.873109747141192	0.315433773367631	0.667459034186497	0.273402327758896	0.633004767000695	0.365169471126861	0.12586835798939	0.0343271036960316	0.0926993367903509	0.618857149082497	2.48316136026503
2008018	2	2.92152639926132	0.253634964702706	0.0643365873529994	0.054503247110016	0.16079063919915	0.0606340217633195	0.151546720461158	0.354519430526335	0.973223187864007	0.29484116666447	0.675542774312785	0.26772628771256	0.602228933828997	0.336592540283918	0.123484813556844	0.0386557692630313	0.120312127175562	0.505797351302103	2.25224928170198
2008018	3	2.78948993514633	0.0272027857903859	0.155770108333416	0.062082263062549	0.140649269537096	0.0311688666710171	0.128721744279259	0.707488683064017	0.916004782681892	0.200116009626598	0.762236694444394	0.207643712120938	0.599598645530636	0.321304184074802	0.120027276978091	0.039995872737995	0.122383423272773	0.959140529841185	1.69946993119607
2008018	4	2.45049670427799	0.369926196230872	0.313835873138336	0.0536532922327124	0.181698231634918	0.0151610626310571	0.115367691971737	1.58216654079755	0.787228538691248	0.220325484446793	0.835571669472514	0.167196362842217	0.58185883263502	0.307083718490783	0.116225517984244	0.0444848362542623	0.100134401408183	1.11921147312559	1.23605791156486
2008018	5	2.04684333488648	1.0138409330612	0.422417241965888	0.0271312876732448	0.511601583141538	0.0527756307432809	0.107034716959812	1.72707018022313	0.741828097858643	0.386820592208621	0.876840856477974	0.173768406634479	0.569809593172285	0.292274904052024	0.113063386601908	0.104246972680104	0.102514702940443	1.04327848514611	1.14297808875759
2008018	6	2.00771853697434	0.385589438345816	0.345430539407831	0.00683436195887834	0.735838625787741	0.22966693118107	0.14434675063011	0.675253340096456	0.644349666545518	1.34372495082364	0.877669479037683	0.193551900302548	0.592315012505276	0.284114597664604	0.11055003711703	0.0636366407107218	0.0982298281317579	0.927376048535532	1.29048205443308
2008018	7	2.67378078578721	0.159187205288741	0.439500045116453	0.125523249369934	0.423305805611705	0.284563013286858	0.402082054008564	0.496635147207662	0.618790518020094	1.64507250718104	0.843580719156634	0.181125065863586	0.66203626165918	0.299758668822629	0.105274823530709	0.0730988332677439	0.0844971315619591	0.813773953966231	1.32589401156105
2008018	8	3.97609416128014	0.787410184520633	0.413733403495764	0.240569812861402	0.251350178346887	0.239783037008121	0.9561527545591	0.858051852753673	0.675759891417376	1.74445688269628	0.857548002190212	0.216124520307122	0.719204846353741	0.305493785982759	0.0975900840056891	0.0562210322582947	0.0765816217142695	0.72887193871653	1.38630772946339
2008018	9	4.24220607498846	1.07189107154795	0.308682590127114	0.16938170929365	0.264900255085009	0.132659997278093	1.04719415354908	1.80437331755817	0.743403127579606	1.87978753187129	0.869142052548273	0.230065750541892	0.760512110926177	0.298157686962176	0.0911410107444883	0.0668639773181068	0.0776226445051245	0.688660906815591	1.69624828803092
2008018	10	4.80114000702478	0.868914660737233	0.324710542938615	0.0904179563466285	0.311863630237247	0.0978449514961674	0.854238427437144	2.02053095932839	0.867823187932707	1.80757346608271	0.84820998020443	0.214854473825533	0.792865820863303	0.330882990158966	0.0869501083182723	0.183072338064167	0.0848388300213225	0.69882678388607	1.86014478335483
2008018	11	4.86785328546648	0.700985981744609	0.4837369923139	0.346669614996535	0.348452752302991	0.402137241238907	1.28986383854087	2.36447354007455	1.33024860394812	2.2526737361887	0.782757819882739	0.232885007751656	0.851898413098784	0.345478212939027	0.0831213697411162	0.116657965474452	0.0901269532782572	0.740602376870468	1.78665392779688
2008018	12	5.45604163814146	0.71242321268196	0.901291196818202	0.639209958289884	0.646019724546549	0.418469636211913	1.26127075733611	3.18495027797589	1.86730736333353	2.26902866695558	0.725986165521946	0.233198946118838	0.922521307311135	0.335524551322442	0.0767482978426467	0.0629993652137442	0.086800220973522	0.765152652300041	1.53517198972481
2008018	13	7.10920908378776	0.695777796976413	1.01734647624734	0.80940438521794	1.23729344699274	0.20472001967612	1.61581501587828	3.4120759970579	2.03436053136262	2.05284016833073	0.65617062391933	0.220047703505231	0.96763890122258	0.299917321873923	0.0696062571920889	0.0464923914938301	0.0754490514812997	0.919104226682204	1.29007825484223
2008018	14	7.49029338687231	0.790950235464748	0.814644662934761	0.827244301889905	1.91168682388443	0.127585264638951	1.49332658034879	3.36329148779725	1.83454400843593	2.65001792897258	0.541534323393787	0.198676718286382	0.961017820479707	0.2576982934574	0.0626172866629602	0.0399157362153218	0.0668114650473465	1.41195008712237	0.972072247023734
2008018	15	7.55823265530706	0.826331629573315	0.615244723797725	0.637234095178966	2.6234193663111	0.201498850385708	1.59034898681095	3.38058517766334	1.79089955404308	4.47663710739521	0.466636776853884	0.178887682738794	0.870851550756841	0.196766634258319	0.058107100868571	0.0379860867778734	0.086462088832585	1.70040304233537	0.789177599520971
2008018	16	6.38771352957131	0.550135609790413	0.46103114086663	0.458025522552622	2.54796829789887	0.254535308849342	2.71644156713331	4.23879369328647	2.39882041801242	5.12588023837586	0.423049513635352	0.156633356455042	0.707566934125258	0.128544293173922	0.0554766653221382	0.0474027334359453	0.13080188330908	1.67807164160528	0.198370862391373
2008018	17	5.01754909626057	0.503209980887625	0.445065388280399	0.398491214313996	2.28294165952197	0.232415896453966	3.46247448905369	4.7761689045012	3.30851021331247	5.50884218727963	0.453648781816574	0.147336200359062	0.621584284379509	0.0768689707131366	0.0502070485379473	0.0576131084037078	0.172240194025261	1.90078537496681	0.163534772592188
2008018	18	4.05753814128546	0.564117827107409	0.595117315776244	0.40713563683087	2.029173571571	0.184106233510829	4.16805775089494	4.02708870128863	5.05039167896693	5.04433327503786	0.418522026666587	0.144293828488214	0.637602743379267	0.0731787129961911	0.0432804630307583	0.0643079158544434	0.221492042331158	2.23863810126668	0.907226854442363
2008018	19	3.34471860647346	0.441746152801643	0.596131680250312	0.264506791768347	1.50787059328619	0.179830888756316	3.58854000669661	3.0146682667524	6.26801704222957	3.05764544179922	0.482820056353886	0.144218902289782	0.93088275134245	0.134851661438629	0.0338802348088488	0.070202733354202	0.631593245890692	3.10767837657838	2.15789457679546
2008018	20	4.60406021370372	0.291567845957681	0.459986597054481	0.281522236443626	1.16741890129018	0.14448915298548	1.96472193837688	1.4666748495812	5.17194571685363	1.49182936762244	0.72143814181628	0.139907852969474	1.11698082587329	0.194612954228852	0.0254580218082398	0.0794727671287873	1.04108987335157	4.43421351590902	2.89384848723612
2008018	21	4.98056232184387	0.378783434602291	0.408688233011344	0.30826429095755	0.882534750725394	0.128345069983611	0.981838274988781	0.828037993304128	4.80603650071379	1.221808045568	0.569216581527721	0.136673327232341	1.28678508696023	0.169411057168552	0.026079800157165	0.0940475901329474	0.975164064142466	4.55879189574582	2.95985351682109
2008018	22	4.59222234018192	0.139493501763854	0.371888496290223	0.231798235017207	0.581544072995974	0.422521888335836	0.484788439012644	0.692635251909174	3.82991863937968	1.63964268541206	0.38844588499788	0.122417356811089	1.41988108257999	0.209258948023849	0.0325726957955659	0.111880051480388	0.979086858170633	3.71933168424545	2.56048221071074
2008018	23	3.35110974813823	0.270785049790872	0.335407346232937	0.273098307096257	0.377273466063257	0.613484594057694	0.849884364740739	0.950442173440977	2.70152347868149	1.48045091893627	0.63374066563326	0.142290193236618	0.846847884927223	0.159286455601258	0.0365529808814871	0.125247150921101	0.682310147188644	3.12007268180012	2.67579797221919
2008019	0	5.38255044473732	0.62305542536673	0.327780710133609	0.146703152000254	0.340402502314642	0.342303752598049	0.669832623657986	1.16614378696712	3.53009853338321	1.15364828570615	0.80398736058797	0.219253027171831	0.216655897584074	1.28851805949553	0.0332287869873697	0.133221538879445	0.374377519192186	2.23495771597656	3.05381388615039
2008019	1	7.82615465264323	0.998340227927279	0.292891985952875	0.190083670941898	0.434833823817375	0.318067332627216	0.295577132740411	1.64651747115857	3.80943348935612	4.05756238324972	1.15584224964801	0.281025444278389	0.383059828538442	1.52913352672803	0.0295603925204035	0.142240374702792	0.279074515469132	3.35854884007926	2.74109410762627
2008019	2	19.4368839815563	1.48703290873723	0.194900011739592	0.468305789142916	0.490080576169242	0.559035001498891	0.673667749660098	1.92114793501334	7.94173505730533	3.77743605528454	1.59214736605837	0.271281897479381	1.0599197865357	1.18498103239358	0.0303336478967206	0.151315317258607	0.282415506592838	3.771204495305	2.51395457222283
2008019	3	20.1204997787561	0.763920160596475	0.210751753547587	0.847089683609578	0.628648787697798	0.921838340273997	1.49689493415136	3.29163371270968	9.15632503396781	3.97650924739857	1.76064577965058	0.31910505577421	1.4149346793407	0.667722505935098	0.0356644271437039	0.100981578006479	0.260710199993812	5.72165318896629	2.66958748719275
2008019	4	13.7611555445964	0.967539910521932	0.443026155424571	0.786659291045251	0.815738789842962	1.27700633406077	3.06284497103852	2.74242499388843	5.78367217373923	5.41945171408411	1.66905615859576	0.320426108598358	1.69097738295397	0.356088673289298	0.0420775758050429	0.0324578916026576	0.149984581208672	7.28777845003958	2.67876240102029
2008019	5	15.7246834128756	0.782257630661436	0.243142364591092	0.484964495278199	1.32193437536074	1.20443059065067	4.06307478664759	3.95190410315028	12.4728087367309	9.01132570250355	1.78600103455706	0.290265944720504	0.756198528136759	0.189559176367595	0.047799235127797	0.0221810533594282	0.102662689363325	16.5283113474299	2.5307461535692
2008019	6	10.1678159193871	0.40776311585343	0.22807453451281	0.510010387777199	2.51795159593379	0.903902160094629	6.1392558447945	5.83862939321537	10.2451005312397	8.05699940814532	1.96063466841828	0.291540710134738	1.03614676135572	0.151861886476157	0.0469914931668977	0.0258277177785712	0.237228603259348	8.81793474807101	2.17549069169642
2008019	7	10.8934989205107	0.125332107069999	0.243686885076002	0.160044416653003	3.33347072774659	0.755302485051459	6.10017209424861	6.56293765470805	6.99985997431928	7.78260613550732	1.69056061343969	0.290464940997951	1.29667566931634	0.0995747015140239	0.0677897420917867	0.0187982659068412	0.23230688908214	7.29977816775342	1.90219728797163
2008019	8	9.44342014631557	0.0593628109497119	0.215615610106269	0.0978673341772125	5.23797394470808	0.603075698672539	6.06041213245531	6.85594229471532	7.2632188562152	7.98843338889378	1.42764163056247	0.291358579374059	0.791258621376755	0.105753432127462	0.17343183862084	0.0023462492239731	0.307795098236907	5.84734088610846	1.61863175981151
2008019	9	7.15420200360947	0.0491783456987408	0.170649994612857	0.174018457065364	5.52924327738607	0.350536972050677	6.89813347963428	7.52358110270081	7.82387106742359	7.9462667444849	1.13188208348814	0.28275266487319	1.4458228195321	0.20102829660803	0.269912448465753	0.00970250011953727	1.73997068967938	5.32931432010164	1.13135987056988
2008019	10	6.11855893708291	0.182763231731459	0.181408826782099	1.02798095316032	6.01523535135554	0.173410447764888	6.85282225412599	6.53445615283829	9.28468893932644	7.33004452400424	1.17898544525275	0.273859193213601	1.634141179584	0.419648707488825	0.193070112111082	0.0809662306603281	3.15639812270079	5.45648227494712	0.790029109292754
2008019	11	5.75225378107745	0.600428258105648	0.171241888064337	1.74026975316471	5.84876925709871	0.107530004460046	6.91647892836136	5.20385934595353	9.44410176949301	7.89673196768281	0.708126359579945	0.314004537399067	2.05609054572585	1.12092894268813	0.0883505845335149	0.141594038477065	4.9161093352838	6.02083547083335	0.466964495696227
2008019	12	5.87379538458125	1.0873518201371	0.180755851435769	1.88533416230751	4.65722650548922	0.0733158854148513	6.86346186120784	4.62698392561813	7.9189856864302	7.58235027215315	0.872540078859911	0.308146060914757	3.05288119237276	0.843187376305588	0.0512358784103288	0.0978067296673106	4.75043935627132	5.89027088368359	0.233196063910952
2008019	13	6.08952233286911	1.31558835001322	0.167177576196126	1.58617697123373	4.17215138440057	0.0413429393841247	6.86695430417491	4.37764314898427	6.44521981573041	9.38637407986742	1.57586305214001	0.367014599800976	3.15923729812436	1.17620508761872	0.0549031628436555	0.064447560180726	4.43957331328709	5.32715586081916	0.154973140379597
2008019	14	5.99538516726759	1.39216235225672	0.143822404773402	1.80683637608302	3.86030722347772	0.0201747516902046	7.78311594319456	4.72846146486668	5.8074255652219	10.5670268688338	1.35815814702435	0.351727646632882	2.10569285350225	2.27697409757175	0.0398167904932915	0.0477015016130448	4.25099009560307	5.67232689649137	0.267262320287982
2008019	15	5.87536483727581	1.81413153643421	0.139404353731983	1.91544146838127	4.24140516486231	0.00464146840687724	8.36390509438946	4.96183126860996	5.66854105618154	9.55181316138796	0.900603112677362	0.299355678491867	1.80633760882672	2.22838463475762	0.0479563896902883	0.02808249637287	4.22652176767928	5.89220891798059	0.542099589408076
2008019	16	7.04923034786047	2.02118807684297	0.257723146189474	1.77478727348126	4.50177164897855	0.00966110040025639	8.34764959978395	5.1874444705171	5.31283118270904	8.76680968519245	0.545045225546264	0.252384427470406	1.92284202633629	2.34015221940196	0.075595056545657	0.0217600899133287	5.34825273998364	5.00254776771916	0.773891900522402
2008019	17	8.02436259464459	1.91981846912883	0.353193759114464	1.62673150350809	4.56679319189089	0.0875182440438335	7.69809628857358	5.42325299087936	6.5528134065718	8.09709563262697	0.368073824538396	0.406551218686327	1.12681951839413	1.80954960294345	0.09706324888303	0.0238981611600968	5.49315609496523	4.1103332882066	0.71005466362628
2008019	18	7.61427518244593	1.73559627465258	0.321360466783019	1.57968466993562	4.9014401211449	0.296195475512163	6.70145144260089	6.02703539831367	8.93299407827161	5.62491813999907	0.542919825139332	0.692422687196511	2.34688173911	1.63033311246299	0.102632538163563	0.0208314447572567	5.32355042131647	5.28466291910856	0.660928678202602
2008019	19	5.67886030425627	1.6257839376247	0.226347101880234	1.76201201430392	5.63680627540576	0.492251955888556	4.64582779352213	6.38609845121301	7.94458468224148	5.46427268982852	0.961001479956983	1.24705049953201	3.41252109394307	1.61974281153397	0.0753875391362995	0.0149971294727385	4.70234977814857	2.70869258795607	0.577594314147671
2008019	20	4.72035058007086	1.54875458373486	0.115705760368789	1.86510687272423	5.81215997192659	0.617904131550786	4.5211324855639	6.43339456905762	6.03720605389268	5.81911037043786	1.28825537968258	1.29199412158469	1.90499210134831	1.40426514553039	0.0379328936048102	0.00767755312318983	4.56491618523371	2.62986181371584	0.558881639958693
2008019	21	4.69441326060728	1.32371773339781	0.0839449210424831	1.57247294940453	5.54247941345555	0.664188689223054	4.26007395216258	5.84676817396663	5.12874306773125	5.1170984436588	1.07445886053702	1.03351058251634	0.874187040749809	2.08570754870201	0.0545201739713392	0.0031219308297149	4.75829595546482	3.39684280235741	0.48224916238008
2008019	22	4.90738012391704	0.978596172137285	0.0646121709191764	1.15665776682825	5.40873145616986	0.644419335655233	3.96024211079673	4.54120993943092	4.75932929425636	5.36553931479114	1.13974596786429	0.798992102235418	1.54504519035577	2.36304546292699	0.679468153800367	0.00120058523044462	5.05236248456049	5.55930554064713	0.396140072711606
2008019	23	4.79604048712674	0.660319747025492	0.0483775006303025	0.824527741217035	4.86500042167678	0.616315895797673	4.5984620666835	3.92491917951648	6.75577085017458	5.473178762767	1.29216364360998	0.407767328708429	1.70392706144141	1.77768751155785	0.771195694432755	0.00125452413390883	5.53191641844434	4.44060163797809	0.241592901125949
2008020	0	4.38596003737799	0.554945338678818	0.040819253180532	0.600372632886501	3.92583422620365	0.582483351489088	4.87912196321806	3.75111054090337	5.84244575816765	4.94545643035162	1.61757985753259	0.436879373594822	0.938019867983063	1.06372557418539	0.807805510011045	0.0035611999051558	5.61837694726587	3.3188117404215	0.0383831015774178
2008020	1	4.01125385645301	0.553553034931607	0.050769002948865	0.475684576924574	3.45731726209278	0.490123262530122	4.36269446903161	3.62762358421831	4.83035961853348	4.32481877000222	1.94689786339524	0.383773421277237	0.971699447528435	0.714766597266301	0.895205541916412	0.0110141666541378	5.00528962451923	3.28636157532964	0.00267607475347805
2008020	2	3.66068430057357	0.597997731902138	0.0670631269198944	0.428505212378346	3.2541159326688	0.379155152965279	3.37362928321065	3.2464103864185	4.68322786856763	3.66598229419376	1.91136572475752	0.180854396794152	1.59052803707296	0.284602789577978	0.939863029077246	0.0233042994044927	3.99652675994233	3.04562444738406	0.226232607460424
2008020	3	3.36331001475252	0.702632447551958	0.0930018461995355	0.568537025849237	2.92498895708508	0.347022074043932	2.36812563781075	2.8457406500888	4.6883411484054	2.89714320799587	1.74453644298045	0.0513784796934076	1.60895807840551	0.243540757423968	0.830021303932392	0.0392055848684916	3.72230763904555	2.74590073025208	1.06046962740792
2008020	4	3.03978108163569	0.734071382845775	0.140951518150584	0.553809120321064	2.46704649953146	0.32447137850602	2.06969039117476	2.55023060758955	4.64208093510486	2.34965596576589	1.68553601584053	0.0388848634560824	1.62664960157734	0.239057814048725	0.679745994343574	0.0562389753178138	3.81482732151686	3.54830573793929	1.13192173095368
2008020	5	2.77475016533127	0.729144985305131	0.172744020243087	0.569425755884716	2.02544544760686	0.292409801661531	2.03148271878173	2.3095830356982	4.30868861878564	1.66026370884881	1.88287517139862	0.0448411444059485	1.44406796900209	0.241471581747846	0.54363388879782	0.0732735952731111	3.8047360882299	4.20035119844477	0.963398834374872
2008020	6	2.70192831101262	1.16147148228928	0.180002946947449	0.577285142630376	1.8114546743217	0.160691708448025	1.74308407923383	2.20688197708943	3.72559195156683	2.24275811720048	2.22409204300093	0.0476659169929238	1.21930684889022	0.265542192981726	0.456431451246921	0.0911065014478243	3.64972080416736	3.87991655846744	1.22371782397508
2008020	7	2.68079287653331	0.605664432636187	0.191586266187254	0.485150989027109	1.71271067639256	0.123817158692752	1.11443378293034	2.30215508341535	3.41612745031618	2.87774855954623	2.93489091561396	0.0456459409031533	1.21697710622471	0.290735050759623	0.403178835670765	0.0914201337950529	3.37875962328079	3.34278927071873	1.33820573109604
2008020	8	2.53015536615185	0.190915336710863	0.264035948404857	0.454256285915165	1.71355639732618	0.108978947923194	0.815716395959097	2.32481533383052	3.38949029156596	2.44214095437081	2.65499727111095	0.0389737946263169	1.30538787523586	0.316487373263212	0.406454527090031	0.0231828175520798	3.14296748584839	3.20111736374959	1.23664106822745
2008020	9	2.34442199073537	0.0524505657647148	0.332360498262631	0.52081505286106	1.78073120248008	0.0139745483267374	1.19424893661026	2.42074839340815	2.84783910759618	2.03723993437768	1.5558377706623	0.0363222155578594	1.37121209113269	0.407782288127759	0.405135812371697	0.00321352954923552	2.95780075804554	3.33661959979642	0.935212189846963
2008020	10	2.30005612809215	0.00673145136502301	0.360565171721787	0.843341823853083	1.9063775526717	0.00389454490519906	1.18008790319448	2.596317536722	2.12328907386184	1.90369721483097	1.15520184205957	0.0402438563835862	1.26940701356442	0.474058871647449	0.394322379614893	0.00162778506592219	2.7168522997091	3.0703377630999	0.904570503852489
2008020	11	2.25285200530245	0.000771316964321053	0.299633613432341	0.88106088317566	2.00360518224545	0.0319478136901451	1.23530058979311	2.80554976950156	2.30615680418831	1.81733380028567	0.902340051412161	0.0450921144732529	1.55723815087539	0.900909905484226	0.386907435790648	0.00062823056373884	2.41156575962568	2.93766775503415	0.833169548174973
2008020	12	2.14266877878572	0.000389009972535424	0.296864412041576	0.869781521114289	2.16472419598749	0.0654989009304039	1.25977180179224	2.90545368067663	2.51615545619118	1.66175803342053	1.14968168739105	0.0563113339306673	1.94427994372332	1.11666105971217	0.373313575952656	0.00767892618203857	2.04494516896708	2.89579418891472	0.693004904898172
2008020	13	1.88802745240912	0.000319669308087616	0.253958422739387	0.577292651040182	2.06629474265818	0.09449934279088	1.13257567518338	3.35189170199953	2.12775398554281	1.51473777732579	1.7798720271094	0.092823137957172	1.99308966949065	1.04539364889632	0.346663783052856	0.0767703816848535	1.6008553151375	2.84945673941385	0.598202627412374
2008020	14	1.49515496094116	0.000328593236508718	0.255416986440577	0.354088704002319	2.92969265495793	0.0987826947543032	0.865619492017435	3.40672088041668	1.8701109113301	1.31251240526441	1.14966260581266	0.207584814014	1.92598393346913	0.610265913796658	0.283052216972344	0.0334035241036593	1.16656835472999	2.75025714380897	0.544810415011485
2008020	15	1.20593780307323	0.00431551790149278	0.240480625482215	0.203395958860261	2.80132007279192	0.074241202734671	0.731722866839465	2.95494935220157	1.82684331939556	1.16359178166249	1.14952363756574	0.53807750627766	1.7921643676695	0.421520223333314	0.232616711598714	0.01133936809739	0.796929182257081	2.81347911775147	0.527397188420733
2008020	16	1.02064506486559	0.066116669699231	0.230966111000882	0.123400120117028	2.33125894477613	0.0742853124332503	0.655198051891926	2.58530911457618	1.74780161697294	1.10563763201877	1.00845301544429	0.840213237915994	1.72499068787996	0.389162545921796	0.218362378892363	0.0236644605923661	0.503932420605243	3.06367389174499	0.502255764940845
2008020	17	0.998983819484395	0.170140498267567	0.261008307616396	0.0780792752957981	1.69971993125458	0.107847860088078	0.537449452922803	2.31182049333357	1.63045143495803	1.16831298648033	0.880630886227813	0.683247886984764	1.94181159141011	0.352347257113275	0.253437572544665	0.0352092559895936	0.511818759604499	2.68089738521371	0.448686567066772
2008020	18	1.06439625653519	0.203225865427165	0.303247699500451	0.0563569957177237	1.30425635276016	0.11459540770788	0.419746345542467	2.15991806542486	1.5694313146732	1.41446759330975	0.866181357612033	0.841654793633537	1.35243994740866	0.352118923301357	0.308360923867586	0.0197055721013067	0.687427900706804	2.6017272832815	0.443591993984291
2008020	19	1.14239466358201	0.232399079152592	0.331498029108046	0.0315800723521742	1.13608747941369	0.0819862474396733	0.35978245211386	2.02362957849739	1.53115263199195	1.72349297034849	0.935546397221691	0.669458905948348	0.357098570863224	0.359261048904073	0.574535436095478	0.0138656548360273	1.01932846758244	2.40196389560208	0.528895118611285
2008020	20	1.19752556437278	0.230110110863194	0.325889537282243	0.0155208534104688	1.06101750058235	0.0489583652161649	0.40956136124535	1.88588879032278	1.555377906293	1.95904071738989	1.16440624655348	0.525902711693943	0.220942572084629	0.317676025097754	1.11366799356391	0.0128607357163446	1.5775338021172	2.189923771851	0.640180312948138
2008020	21	1.26517451770629	0.195415596479465	0.293914925356214	0.00703124343509841	0.96513334378639	0.0257032109586507	0.491917245599331	1.62412922115126	1.71588363999874	2.29831698828404	1.41746913431144	0.629010831106634	0.360532066307073	0.26407277639276	1.12962983471004	0.00822704756190413	2.13461073648424	2.39225744858863	0.748555865534678
2008020	22	1.61743763433057	0.181002399993296	0.211888688426726	0.00519771936249347	0.871562637924667	0.0102083054462699	0.550079011569562	1.22374812993545	2.04460865532306	2.98806150513685	1.36103042295263	0.715267617629632	1.45736603229684	0.231900349400632	0.754448411227	0.0100402437167128	2.76284127607425	2.95769725478163	0.271063319369823
2008020	23	2.09622604113038	0.156063189134429	0.271516540381078	0.0131752077135108	0.845293012115294	0.00469233596628141	0.598195882093591	1.08292973859256	2.48622087147951	3.70550797945669	1.2325597911928	0.68921172710673	1.88561547505718	0.21923333769762	0.346423366254122	0.0143728245792551	2.9591520572526	4.42918195731139	0.132910922628708
2008021	0	2.50785197651261	0.103603946889183	0.358466214071721	0.0540385749695951	0.912375088335542	0.003077815445894	0.710340868888499	1.01774415121403	3.26846976808253	4.15170766256601	1.17005908034206	0.80103541342992	2.14122227744392	0.217040841129717	0.159995423983851	0.0165041259029377	2.5264717019547	4.41842323128144	0.437958015186825
2008021	1	2.78384234325899	0.00348911681122439	0.358225624282421	0.0952229600358949	0.870370263490795	0.0109257261067806	0.916932381212035	1.05432810491049	3.97580303620064	4.15796514504081	1.23938316895167	0.992625601227931	2.85071426193935	0.213995476944159	0.104901750110812	0.0166043057945454	2.08716558201379	2.54228856246554	0.377957714925116
2008021	2	3.15412972131413	0.000103614602009501	0.336521385313559	0.0920978965345413	0.771740613318074	0.0792638718717937	1.13827170250964	1.27407212677162	4.2726347303911	1.51942567480596	1.45230829189143	1.11537895156022	3.26586504392629	0.210544013842978	0.0799266192539286	0.0224181736285891	1.6493050095956	2.41826822024702	0.345892933093414
2008021	3	3.55778094363883	8.42578627823349e-05	0.309524183353217	0.0941933114933186	0.685143312397074	0.0453775564268457	0.995711108030587	1.65148152373458	2.81911693083828	2.63623435758931	1.45269010944303	0.861490174997771	1.8166211997533	0.209949474433718	0.0600210294296919	0.033970535991103	1.19252733009498	4.83864855522329	0.513784208314632
2008021	4	3.85590050997283	0.000102963145115403	0.293669644328564	0.0804425493557405	0.7647441485263	0.0409944655391007	0.88607627858844	2.17332291067889	2.7891800018985	4.27079783291428	1.3325912924415	0.850318855564283	2.81371059821733	0.209797538635694	0.0290051873059793	0.0545155686724028	0.949068429183024	5.48832726367721	0.673144670189089
2008021	5	3.89581567737655	7.70365526132801e-05	0.279047022281253	0.0603066436791376	1.10073676892391	0.025444886838212	2.67279611119077	2.55605749736945	4.36839564851725	4.6339678836111	1.00014149984978	0.756251341001707	3.95918243356576	0.202663037031867	0.0279876873948336	0.0566962676063959	0.880790637474117	6.13729772481628	0.82533838693007
2008021	6	3.89842265350827	0.000567112936152463	0.295280392372433	0.0376293531994672	1.57176828717391	0.0102195031042933	3.95263653923017	2.93737792188178	4.23494993830343	4.75220457893613	0.816349276444038	0.467021191133291	2.1448036036007	0.19638139309639	0.0376657089587369	0.0427811754596286	0.856777306393281	6.65859975796083	0.858746085431115
2008021	7	3.85805941105147	0.00859712744752964	0.312576926801246	0.0262811670547568	1.99559073924551	0.0203408970641628	3.84113962283438	3.14310668651341	4.9692218692065	5.42977712601346	0.90716910912446	0.370455890131559	0.856629058968829	0.20661673719753	0.0313381427066109	0.0532426110568729	0.858018597394391	6.34935307904491	0.97715897230625
2008021	8	3.87543542884474	0.0585089939444483	0.327477057907089	0.0336023763597087	2.29430294930855	0.0328440714536375	3.99157004277681	3.10406088269483	5.73453926708923	5.84817035595186	1.21908466179741	0.500334121906195	0.711507785401229	0.246413182372674	0.0142332646490001	0.044238932217265	0.810663471290534	6.49684115444446	0.769660071965928
2008021	9	3.86228725047352	0.100922408682665	0.367748921254117	0.346036161309486	2.42208745489269	0.183952660326973	4.39911497953138	3.04308420486076	5.97409684589052	6.6965983456941	1.09451791771329	0.663440261542362	0.581440924613265	0.332409568101881	0.00987057963738218	0.0277615854043244	0.852088048974037	8.48873455083538	0.781956243116882
2008021	10	3.69969323068161	0.0238487228106451	0.383261179755116	0.40151579294434	2.38124965718732	0.213358732700011	5.21538490800193	2.93817395501527	6.06965969530751	7.86015415169911	1.14558966372082	0.747240696829473	0.459486386939586	0.465034554486746	0.0120852086832197	0.0601595678647055	1.12765516145223	8.01882440740392	1.33965586089861
2008021	11	3.55943315420217	0.00437978195437469	0.382175262050561	0.351801794294357	2.27795440306206	0.317497011986256	6.36756049913746	2.79936615552733	7.36281772937304	7.86975124153467	1.41972744821997	0.772598371684096	0.315768473295877	0.797711087715578	0.012135376598701	0.142783470846748	1.51869905903921	3.82148756575157	1.42298349019906
2008021	12	3.42023836825362	0.000979171702928737	0.333537339715197	0.272269675942492	2.14548571361812	0.270507282485497	6.24885046211144	2.67453467458985	6.98177914102447	7.36814231714545	1.90683817535343	0.727114654751593	0.193824459588697	1.18553709284513	0.0104628307823258	0.146388841859279	1.43869254212064	2.91446103056983	1.49142002881392
2008021	13	3.26211257412637	0.000211346210240024	0.263153246956121	0.290659990335014	2.19197027683854	0.126358519376051	5.72800083366011	2.59325267139574	4.73484931622772	6.89931774986449	2.15476904321092	0.659481404582425	0.182800001784097	1.41204669801042	0.00774332041653972	0.138968237267015	1.54687811576198	2.67442186979968	1.12255188461631
2008021	14	3.03551112057128	4.79521716758582e-05	0.204185587243616	0.226659484359535	2.24316964700594	0.090493355487155	5.26202731547558	2.49896150599658	3.53273014375579	6.4174615773757	2.23246943746519	0.505126215299293	0.164207522535003	1.23635684618353	0.00505483530129007	0.130930290276447	1.85900663772296	2.67404207470761	1.14822864201269
2008021	15	2.86802323334597	0.00084073333563364	0.109447292799719	0.18534622721023	2.12946136884119	0.0752814316119089	4.59717310789818	2.39140417593351	2.72268690039532	5.68061745950501	1.99111094998427	0.401225442638363	0.179992227963236	1.28216381584233	0.00274070590847191	0.0821806002071938	1.83450029509336	2.76567439790381	1.7613090395002
2008021	16	2.67674813971818	0.00487165114879159	0.0789775426073901	0.0994735661145447	1.86334939819476	0.0573816899415979	3.9069794374155	2.3179195231414	2.30379212224678	4.88845340611387	1.56396059290724	0.963634361955924	0.295084442368322	1.27760226747711	0.00110814893529456	0.0378681686727963	1.79995435562031	2.73598152655135	1.90864804042345
2008021	17	2.19277876532742	0.0318771668612156	0.0642733394615468	0.0865370944592002	1.75270196155058	0.0394841467351087	3.2607727520784	2.41060515969756	2.21828878993538	4.41481426344199	1.26347969376882	1.01885079827777	0.49713103723473	1.16397576691265	0.000516918937540393	0.027940327245468	1.74538095400865	2.53619743376161	1.08117384736015
2008021	18	1.90848337185281	0.0789152496419674	0.0579657839468863	0.0345875568799002	1.69284745600919	0.0230800827825499	3.00574086439814	2.17262913479803	2.17355546771644	4.30694714417497	1.07671328361864	1.00504218295622	0.637657592268474	1.09400866391602	0.000328127594833771	0.0180445701723134	1.89745615606145	2.10218025427544	0.569159227381065
2008021	19	2.49673412282679	0.0709179495704795	0.0623968055195053	0.00783942255056783	1.4391140862177	0.0650723948743342	3.11514114935134	1.97641194845901	2.27548766287286	4.54546075108669	1.01621875007453	0.9411330746689	0.789797546316498	1.05462910400154	0.000252970459803123	0.0185099440360998	2.29772441635932	1.59323756943937	0.180733990783559
2008021	20	3.13178833646383	0.0984738754687472	0.0619586581705942	0.00242938955481841	1.16199945862534	0.0579890452291233	3.27637335845378	2.31317996686006	2.36504771192504	4.95610955061444	1.0172555338123	0.931357534723896	0.835248906714598	1.08749251583767	0.000210464974413131	0.0212785378736914	2.41702727123312	1.37680656251145	0.106028519335279
2008021	21	3.60076075182492	0.0488710520847968	0.0498187491231717	0.00503025975129579	1.13364048252197	0.0387981898808463	3.58027258453976	2.67883069519739	2.26637560514083	5.3723381341472	1.14257866230537	0.968875915882353	0.902288990817061	1.16937983847405	0.00018851846409438	0.0259757513629478	1.73023712202573	1.28360712623475	0.179632706730976
2008021	22	4.36284630099972	0.0211557133746624	0.0437949002871094	0.0366470508487267	1.35911904482631	0.028326245340401	3.92952027816543	2.75982880864232	1.91898658970422	5.86364719252161	1.38429406146463	0.971031155038307	1.07062942471886	1.29104208309127	0.000370138855254665	0.0279007933272624	1.50155940411367	1.16340003860508	0.553600880090189
2008021	23	4.72799314339773	0.0162728590098828	0.0494739533548139	0.148593451976222	1.67432081897564	0.0129853912506457	3.96227048187619	3.20152971646131	1.53416767160876	6.87209483885991	1.45573412446522	0.836230272576447	1.22832150467785	1.25841187239821	0.00021219671198095	0.0117064778254257	1.94269384333891	1.02233707306253	0.722314056091409
2008022	0	4.86220478867467	0.0203182103542991	0.0815496421498507	0.436437987202812	1.75131642726168	0.0041296323998197	3.38284523949121	2.75432415165706	1.36502068911934	7.68269376883709	1.38602853104262	0.603399324443904	1.42323011367307	1.19882762530528	5.604689909883e-05	0.00652697313283551	2.04966623489814	1.04088665961788	1.09160461865616
2008022	1	4.88040781949519	0.0246807272121496	0.0520717926564296	0.758668104921807	2.19045642387171	0.00312753116539848	2.4819748844958	2.75105553946411	1.24762922131293	7.09122475536482	0.981130151196177	0.386539539855322	1.65848987327631	1.12908020341161	1.18402577247042e-05	0.00443010604841972	1.90234989535797	1.30063124973127	1.35825133083672
2008022	2	4.53257480026506	0.144678713658336	0.0277259783590323	1.03352729091584	2.48856717066285	0.00410983987043829	1.19012893765187	2.8345381218924	1.3044076123847	3.86261827281364	0.652369300324442	0.279553185992354	1.64016122838112	1.04075956746891	3.26493325493492e-06	0.00319696020964647	1.40895885092355	1.24016864799403	1.19297648312296
2008022	3	3.63210648280482	0.871278024794812	0.259515448508052	1.3055127096651	2.2141254703368	0.00834277924582762	0.777830951344248	2.38830964441288	1.72336312554535	1.64582389961677	0.60979772483988	0.240733032817015	1.69899007419391	0.942461391307645	3.65356809334753e-05	0.00202507849474628	1.07440231288299	1.16374008231699	2.05589606499942
2008022	4	1.60111202798251	1.72154281809866	0.738700738571475	1.34016132279217	1.86994724779348	0.00466775549363847	0.715666897583055	2.00287429154022	2.30011765322016	1.09540889436526	0.583288088097482	0.247117532941991	1.97793586012157	0.861886616705689	0.00107842799724201	0.00106831582488517	1.10953486480991	1.18672474869711	2.86455346675176
2008022	5	1.25444273346293	1.7317224521599	0.346802086143078	0.8442894862086	1.50895334955685	0.00234387215252554	0.844501414451988	1.88640717866986	2.6929002841787	1.20951801195441	0.517840625012377	0.280735235142659	1.91485543647769	0.780601098622994	0.00258497802798808	0.012420815813157	1.41903105823241	1.39657065481663	3.08277255278831
2008022	6	1.93221783268213	1.6575527916311	0.115034269405678	0.569115134157251	1.3130842837468	0.0617244194496546	1.02742888193591	1.72728376647991	2.63722663908233	1.59606945390704	0.452124653639307	0.344657683946971	2.16877430578602	0.68973155011927	0.00132685266372614	0.0099925915932334	1.8266576887431	1.64967395882189	2.8822824215098
2008022	7	2.9752420583634	1.51308739373925	0.0114089165790123	0.736467484369289	1.15505446863733	1.08167732373538	1.27378052075919	1.52437113533456	2.31802946998653	2.44477694505985	0.406382508336993	0.38185598435306	2.34029656312666	0.630627077024276	0.000203932397705878	0.00366061787435602	1.64137353362862	1.83435327530586	2.64905440205057
2008022	8	3.12760367314164	1.46268948226944	0.009834708269731	0.801951199196092	1.32343313095825	1.16967398877882	1.53569381675722	1.48345065204104	2.27189707591235	3.47554173818776	0.37501280034731	0.361192882369621	2.23938903504818	0.58634624156586	0.00023276665625377	0.000323647666633312	1.44143657305971	2.03117717989224	2.76617468705185
2008022	9	2.73675278504435	1.95442961284055	0.0367696543028187	0.691736316215737	1.97534782201376	1.25643148889682	1.88124714353283	1.68328578796492	2.29897312860397	4.35344441656069	0.435176941795456	0.317352084118361	1.89745680071784	0.571669923073743	0.0303310499693766	0.0066444565512746	1.43858267815784	2.23178394643848	3.61850841610602
2008022	10	1.87705216959608	2.03547962260784	0.0565152116860834	0.557868495494072	2.17728464414476	1.20567544559129	2.16619596303557	2.06378424171149	2.33684195378484	4.73024800376091	0.594073095618089	0.283269107324868	1.6543427944421	0.540864393940445	0.265159075565757	0.831954505182793	1.4080384221645	2.34058662169848	4.426142647321
2008022	11	1.65463780721242	1.78984188582193	0.0798476639526979	0.580018387308171	2.10704960848173	0.991827084562467	2.45529097795114	2.17647556033306	2.34178671736913	4.19612344551107	0.60668652421518	0.258570836812213	1.46750934160081	0.557077323597608	0.539482604964807	1.07308594264411	1.14708261802906	2.54887270710903	4.47231755881675
2008022	12	1.5838183478448	1.54564399000523	0.152942958066956	0.791008926299826	1.91031187247695	0.706107918301176	2.67824732789199	2.00779291778626	2.27804956705703	2.78161394452933	0.608198203776633	0.264383592230313	1.43912040515567	0.605536292034163	0.821858862848324	1.00769831806774	0.980085796571684	2.78834889992063	4.27053878962025
2008022	13	1.55774730564197	1.41373044449905	0.218231980837832	0.932392885975173	1.67051054132451	0.592607127483728	2.4338316710599	1.81078080832633	2.14565336426316	2.00753312820937	0.592375634166803	0.250299164305395	1.29897044210823	0.614116917538274	0.582675727768781	0.600254742478065	1.04084731646094	2.85465688760279	4.07771054787178
2008022	14	1.52512306006164	1.38823487211919	0.258475261874619	0.770009195876707	1.55255475565905	0.588361144090206	2.11557002406385	1.80305636222044	2.03061961729863	1.61679070233611	0.470132999688722	0.230927776356327	1.12307089468234	0.611485162037352	0.372311010105899	0.457716420246405	1.12572849778266	2.80666761927778	3.37778761117583
2008022	15	1.4459052662825	1.27504550621633	0.275888233267723	0.729031882673002	1.4718758457771	0.529849168765999	1.65807670029361	1.99406266582035	1.94337444967038	1.594365881365	0.392442067996106	0.228782221669856	0.968875998011121	0.589966003660763	0.387803427640032	0.545297544184648	1.21204088442287	2.747817796005	2.95979159894892
2008022	16	1.40858586737912	1.19373745764136	0.262427826990598	0.630657979519513	1.41782250687396	0.4240092422373	1.37807502768382	2.38668548169983	1.88528038363457	1.85598494934911	0.326826703675738	0.226695911630608	0.8280222838268	0.555574188292089	0.617864079250516	0.683673115681244	1.16776977093032	2.61219359429922	2.47499871795479
2008022	17	1.39231459532782	1.02374986598661	0.234678276333305	0.61146070364325	1.35289647343723	0.376698144859703	1.26244031954492	2.52396932933333	1.84316719685275	1.93764221779912	0.312331454442255	0.218686834871429	0.76046159270776	0.530725190762529	0.602179857173073	0.825685724394881	1.08180887433433	2.4810389555894	2.0367987522053
2008022	18	1.92175440593425	0.822968782582203	0.210617150376934	0.727129166032485	1.39484775458025	0.352860204333199	1.26421870178708	2.33518354811285	1.78640868239316	1.80921070296874	0.30561940269982	0.209460736742069	0.743077156653869	0.513875894406675	0.594272508091265	0.820227241249883	1.01917682782444	2.33365835983215	1.03206038480042
2008022	19	2.22155954461041	0.666855467766474	0.179166364352992	0.758765261298401	1.62698038141131	0.359893490073639	1.33756407422383	2.05560989081414	1.75970816602837	1.77397861785797	0.279433788608682	0.206191374680725	0.747027056072112	0.503955243650551	0.587700020670655	0.730800873240571	0.965532021516914	2.18849141485422	0.856442937140294
2008022	20	2.26154280480038	0.58567139971583	0.166338029288929	0.845018812236684	1.82867753230019	0.432808185309459	1.51524972194739	1.97550165032876	1.74193889627994	2.05249451171545	0.299982177899896	0.209302978795893	0.695999270812088	0.491460726593251	0.618076362483664	0.549159458451943	0.920370665007413	2.08221802486821	0.772967849404393
2008022	21	2.23456249725559	0.568835575323393	0.157821415867515	0.880367182275059	1.85823838505752	0.448770329873618	1.87395078493787	1.95250589675311	1.72909695874529	2.38947340224455	0.336466296617789	0.276475487729544	0.780949746788864	0.47969076116599	0.674193784145061	0.470983379429378	0.866674032684204	2.04651470505767	0.736034336789636
2008022	22	2.12805676620115	0.556144568372505	0.147941173395925	0.827798651720041	1.67203073668333	0.48918120020887	2.30241592193735	2.04642909715452	1.72193584196046	2.78782553471686	0.360278641816329	0.311751105282171	0.769271624239425	0.470892007458545	0.739181261371257	0.440712188573962	0.910533042393336	1.98964793593206	0.754359104691713
2008022	23	1.98871064795891	0.542684812831326	0.141112604261702	0.722432348337996	1.49981133959575	0.541212092926089	2.69229615498366	2.20724116755159	1.72965588694703	3.348364563473	0.38387173213521	0.295511369759663	0.752368279322364	0.452138345152602	0.760569241869397	0.366177068709443	0.979119956805097	1.94551505687342	0.770588639506963
2008023	0	1.87834691931622	0.541805998119608	0.135908797613511	0.805814635792959	1.44378256149175	0.589252506773822	2.89410443171793	2.22635788916591	1.73419133174425	3.55084111974552	0.419048204480142	0.305782131327935	0.733293801695913	0.442223124464151	0.663276697278827	0.352084051691501	0.971401230223335	1.92737681642627	0.902792761231109
2008023	1	1.84247607034347	0.611329531219665	0.131722303659071	0.880480319351684	1.47046856530344	0.573323504088978	2.68580438770641	2.22131761261406	1.72921700646879	3.09805070932798	0.412941528085346	0.266880164585911	0.82595982731273	0.455057963562481	0.468699512797688	0.337698866252671	1.03671974386326	1.90295192036934	0.643116797278663
2008023	2	1.93166181070027	0.769814668987106	0.127317293706981	1.05106476189113	1.52174710336207	0.502777696095993	2.03515085834564	2.21518316519384	1.70621215695949	2.35201985982468	0.38562427704265	0.269824405717511	1.13493085579885	0.479772199611452	0.441912768109382	0.231324094047306	1.01502601177214	1.93530122735947	0.475425265075137
2008023	3	2.10040520351777	1.11839719168302	0.12302453321783	1.28589605842402	1.51950455968888	0.401583882123631	1.44326239564222	2.15614090036188	1.71000734899128	1.71446455309742	0.357614253710513	0.280719590954777	1.26475734356634	0.502814035659159	0.438793794840316	0.226644977245991	1.03409167291689	2.01272954742276	0.327067110014878
2008023	4	2.29783800134753	0.991952207876863	0.119410213436262	1.1603261269565	1.50621984723614	0.341638627795692	1.17307936457612	2.10225936447078	1.75933936822716	1.50548819225624	0.349626399031298	0.284856829918763	1.28968292614039	0.524271738664763	0.353483484804399	0.227483943090015	1.19215973003494	2.04133173650616	0.25249469867783
2008023	5	2.36043448254252	0.8522395463973	0.114537243617539	0.968217987539806	1.50170644121757	0.345803568955896	1.12248626811948	2.0560805629763	1.8577178009659	1.61299448169646	0.35900827322419	0.281328678201985	1.30488778173122	0.5724504020785	0.291239604634335	0.231650904917742	1.30123181468061	2.08590821033484	0.299232314805438
2008023	6	2.54865622048713	0.699917117226334	0.108483512919123	0.759283312431174	1.51083518006764	0.368765269831048	1.29418058331671	1.93097919675836	1.97588916502494	1.78651068988952	0.375428668162107	0.278509628889852	1.34814042859312	0.686516508417573	0.275762430663444	0.279180496595195	1.33345563994038	2.03581685083384	0.335271767142794
2008023	7	2.82697196997157	0.466010685894038	0.11017088064594	0.654692926656006	1.51188766206694	0.582434496611323	1.12174701108949	1.78357424345272	2.04110672814558	1.67918294528807	0.385472612103489	0.28251452802135	1.45920734277497	0.733826973208943	0.277522985036592	0.628133478062724	1.24648176215489	1.98012750866907	0.366825430808642
2008023	8	2.96641158602036	0.360658000665053	0.107233499544395	0.646406835788175	1.46984588203259	0.568768735885106	0.822353998822971	1.91662003254535	2.06669012964769	1.70464007670705	0.411361683106817	0.280337081881846	1.3595104427931	0.684259903213133	0.302386642345648	0.766742017866564	1.15046819573265	1.94528549750121	0.370586724934841
2008023	9	2.59005421344992	0.407824757407779	0.130075153247975	0.910537879049734	1.36553144534312	0.488417324249634	0.509854669448274	2.0555032693172	1.98287372752295	1.26590897142933	0.465334171229534	0.302417926866898	1.12776595917411	0.62974111139046	0.330245971103141	0.667992033130231	1.13224115384973	2.03033250847318	0.313344818766726
2008023	10	2.84147635655625	0.460177734780528	0.146021411309339	0.962820296101968	1.36274798540164	0.41641501751891	0.437741366525887	1.98722381152936	1.93532571493459	0.887490297435646	0.498365877490666	0.336519343774851	0.973562088030769	0.62858957768632	0.369279233435874	0.673967884494782	1.13415941501244	2.09741776491994	0.190279122344115
2008023	11	2.63436771143176	0.420473947533377	0.168756199988019	0.73649399512374	1.50408109239883	0.337570018094206	0.401561674335316	1.65564795148934	2.10691869006487	1.34702815033948	0.520508267792867	0.390697075772319	0.850552397307511	0.88918680185921	0.373414911497582	0.618534455585819	1.12989160000448	2.05309706573735	0.180628293511718
2008023	12	1.9031410646319	0.386673522252054	0.189998390738253	0.527926887943212	1.60061328474896	0.555029411606511	0.313133231903766	1.0731449332562	2.09709433788836	1.42413270212719	0.540017718947908	0.394720964347708	0.883915627539692	1.01807419424853	0.40427537680511	0.505334859809054	1.09999229198559	2.13741819754622	0.261779911515768
2008023	13	1.64822452398733	0.294086464663937	0.201462861980711	0.558184843656501	1.55988858130666	0.550541665385139	0.248735341296385	0.634094962168328	1.56115448843566	1.14271687790171	0.559085735584474	0.408319038108683	0.810769087245691	0.937827864958974	0.468073341295541	0.474076884486818	1.04770614647268	2.03721012859202	0.289508779922798
2008023	14	1.63880339674035	0.193436903642519	0.201880082163492	0.442106971331867	1.15970850100882	0.520967377423106	0.223336795392876	0.375474181619021	1.21555709905169	1.12951612796302	0.574369995535382	0.361277006443995	0.719276049770256	0.853006410127263	0.484581136628069	0.462113320554666	0.973571664364215	1.66657249650129	0.437708668949436
2008023	15	1.58865320464395	0.13770492462866	0.185693985131726	0.354789350959802	0.724737121378684	0.424402187353002	0.213065921103706	0.324306934093743	1.39501626582244	1.30163143115533	0.59086580012848	0.304243708490602	0.655567517960835	0.743111732020142	0.400587277603105	0.450994959305745	0.911598742352826	1.85495809043593	0.580427689118839
2008023	16	1.45606352188211	0.127079421748962	0.175401484498113	0.289976616146155	0.215430570943696	0.258469813914889	0.209079612291207	0.300213523737902	1.52850876911936	1.56020268455725	0.601510282414985	0.239363935697269	0.613696162223533	0.639439216696419	0.321313325404123	0.392963757769358	0.903079937102345	2.12309591088323	0.512721397746078
2008023	17	1.68444612538183	0.100742987954631	0.152190212577112	0.242485955196537	0.111922796335826	0.198467520847966	0.202616940781733	0.369403091846048	1.45732905472331	1.68428981567332	0.607728066608768	0.171012448052831	0.568140028259161	0.553113824092327	0.282542084448296	0.282644466052327	0.936764679982469	2.14632695240269	0.399784230508835
2008023	18	2.30087915791795	0.0420655873403909	0.135643456640859	0.183769810263629	0.0846899045493604	0.17837857514587	0.194395418221695	0.388193200816681	1.38544245908769	1.64858394277846	0.620653283704563	0.124608787817054	0.551080554030665	0.475904597744101	0.279956743541452	0.185356048674071	0.92815452851264	2.00790718179938	0.31826389424786
2008023	19	2.83882777132951	0.0158603286337229	0.125066838175185	0.143412276685959	0.0878479965699893	0.177996259576318	0.192170126067012	0.390699528739443	1.30939614132476	1.57753362314259	0.646247080812499	0.117489903515746	0.882381566442681	0.406062217080459	0.387322443262093	0.168748762228957	0.873836878926313	1.76143126980911	0.267384137062582
2008023	20	3.29619277361408	0.108975714521014	0.124482439533823	0.111130687805709	0.177275070751922	0.169007818023617	0.201763238368271	0.756775749123689	1.26813564942411	1.52620475697643	0.697644594289985	0.130277948550038	1.51247354579164	0.345151868281151	0.527597905649363	0.173053751882191	0.5668871735725	1.66957001475973	0.27257497183267
2008023	21	4.08051764594252	0.264928013760786	0.118228676375673	0.0741227443264483	0.181449701614901	0.0790980819866629	0.213666288199249	1.17684327920813	1.33221356689933	1.16153995770103	0.727065471969683	0.149025640583265	1.83148030063769	0.304541294826818	0.47634341286251	0.184564235098551	0.739989207922926	1.71268379897169	0.324273792714743
2008023	22	4.99393180483512	0.215823509230988	0.110802664405374	0.027461506296923	0.238459019028132	0.0202062233154173	0.223086056320726	1.52046418144883	1.30602123440353	0.850877579254151	0.739259857442932	0.245002866841888	0.794874919285086	0.282305880567707	0.428041559499943	0.171140224677586	0.91286205862199	1.90424372869643	0.401811718943915
2008023	23	5.3730006650669	0.177757507151653	0.11136932244688	0.0116061635329255	0.359747777314039	0.0330075279728069	0.261954132011994	1.59759227328433	1.20218329359912	1.26543295373389	0.761250495453919	0.269408269925766	0.178000357256078	0.272292485705453	0.305277624502095	0.141284900530779	0.747767212275647	2.12867247017211	0.489874621651654
2008024	0	5.88142755322417	0.162099432940778	0.116950536391854	0.042807390602333	0.668228027219052	0.0703079294769857	0.515977210805826	1.59128969790479	1.13053240627755	1.8065714111954	0.845265054410147	0.285360142851951	0.0625360227392452	0.32753199576689	0.221633329062939	0.129005676266657	0.279349496340274	1.47453363890474	0.554011713146285
2008024	1	6.47472446002949	0.156446613570751	0.131047217164262	0.0964285041837035	0.819816571181161	0.116781283481986	0.707070662104495	1.60570562017889	2.06047308537133	2.75491809170193	1.06126333909542	0.302173071140559	0.0653084825810308	0.506076316647024	0.196818671550484	0.111906925700646	0.153795900756371	0.581920423654607	0.572308158595503
2008024	2	8.29035825199964	0.164639282662208	0.145910106431584	0.132324802176222	0.557237261370922	0.143357986479	0.75443395983692	1.57122843031515	3.42396640566718	4.19051789653698	1.25129129551394	0.470593704837996	0.168669884267163	0.508830276077903	0.184326775510522	0.059714423164467	0.122534573358449	0.909368286661989	0.744679163992366
2008024	3	9.02204196111843	0.189530192799801	0.177973407488106	0.140486022503579	0.573226563128632	0.14154878710361	1.13579290373011	2.05689676117526	4.99903250215921	5.0522831637918	1.22697796474067	0.668135887380373	0.545365066839853	0.41562690809902	0.161866138714496	0.0241403424265055	0.125944316207541	3.6876010085305	1.04467826307863
2008024	4	8.65393805897732	0.226400083601245	0.194164620855314	0.142823621301487	0.637870962019877	0.15400112805141	1.78593333322105	2.49226791845829	4.66815719175386	5.07910505645177	1.25356721832605	0.785665386577037	1.10732655132984	0.337781461271953	0.138849601820476	0.0112783685888283	0.123602156829099	4.1119214227797	1.25060875470116
2008024	5	8.27218045256797	0.213684745788901	0.201898087819736	0.145162774076832	0.697939516064223	0.191812782893174	2.029434026086	2.63170103345741	4.72571510713489	5.45210510338742	1.44926436037672	0.784721561858378	0.868249837591	0.306141581636661	0.124444374642855	0.0199542571179193	0.119022239442425	3.86822238492327	1.44196034195477
2008024	6	8.34251303225735	0.160211098991781	0.204476987962775	0.15315898151526	0.952654625213949	0.219637967115646	2.36690547283129	2.89725484758205	5.42395787711111	3.55408775161453	1.69609613334734	0.824752892447472	0.437047452622218	0.444466355811576	0.129006213281518	0.0436123376745633	0.220647907703346	4.50913041394842	1.2549033496223
2008024	7	9.42712940659339	0.146508740940321	0.191750425280062	0.154387145859838	0.940100384919922	0.249434972591937	1.95588481812845	3.25537951462601	5.70465804005502	4.58055831788257	1.76425438245481	1.08460160318352	0.334000452797402	0.589435768727554	0.191708055871496	0.0801696922145107	0.349075921864191	5.70878751696602	1.05512209555679
2008024	8	9.24576971931191	0.183899957917727	0.170540008040927	0.139436492991937	0.925952790586639	0.217909898905622	3.11770455894117	3.60995369445431	6.23620562942037	5.50211215644811	1.98916203559191	1.40488273986432	0.316923731982776	0.655587180638574	0.19488981071728	0.115465027990536	0.380669786193248	7.40095808467981	0.53737871188241
2008024	9	6.92491475980786	0.233807626323496	0.145988670724433	0.111845648066304	0.960351702770592	0.215047647467728	4.21477389571639	3.91328803683013	7.09234591259412	6.02350063950202	2.24962755362346	1.42822448555048	0.190071613627466	0.660414420482904	0.153961962097539	0.135340212450619	0.428418137821367	6.77056960551541	1.39470488118716
2008024	10	7.31461962426131	0.310626745951863	0.215679466475591	0.0976786889121406	1.11367152889659	0.193045939068182	4.39659190974158	3.98894454385889	6.59161576873556	6.86485938594506	2.184468506784	1.01423005105026	0.376010078465082	0.615560670994461	0.132792671737375	0.150739207481953	0.498032363358864	4.7730513813662	2.23576811689634
2008024	11	7.72972095101234	0.327334718999163	0.250101448514924	0.108214707259906	1.93261122809298	0.194597225377895	5.0983515887905	4.48763939163168	5.07146101986577	8.26888289570153	1.69733337249277	0.590226436917372	0.6447432618458	0.634627232045776	0.0884389311590904	0.161014070055651	0.558007115017433	4.9616031902915	2.18141939300906
2008024	12	7.19321976072739	0.205887010927346	0.260156716444062	0.135504699068542	3.18300226102378	0.176064401574274	6.30452111952001	5.2139410354409	5.77232484212758	8.53625939166575	0.895804651906129	0.554256147160014	0.607986009223194	1.02517289587056	0.0445102796821901	0.145731059118519	0.603786499233068	7.87676776177776	2.21890939837884
2008024	13	6.27640999749667	0.298562738257306	0.354135736872459	0.14475666063395	3.38074989442499	0.155765543822712	6.67533153365741	5.09521066581447	7.13428722745978	8.04338223576268	2.35494413770149	0.592805134082767	1.1104122592015	1.04680267793025	0.0214219972338716	0.14032791274484	0.696487360540943	8.49413721796971	1.99380408749781
2008024	14	6.86136120565523	0.975054163525484	0.407820289918289	0.317083916618854	4.47135211535308	0.14795944405408	6.16316795870075	5.33190685838738	7.50841687876082	7.73236892483535	2.98955342849202	0.630318339557058	1.9572891088525	0.698030791580738	0.0238094686210507	0.138219496788405	0.801252150755806	6.63919850475328	1.63908904262594
2008024	15	7.76298883017252	1.79064647640232	0.425037046729115	1.07079336854527	4.1539085905691	0.137023290899007	6.16950869704292	4.91146257827874	5.14700298096024	7.47784737123338	3.06444794218242	0.569732532959841	2.12075275585245	0.384393031046191	0.0235708341389337	0.13628711592762	1.15937661462282	6.43445612258963	1.39519661550291
2008024	16	7.95317583561799	2.19538448531867	0.373754421930982	1.64803671054335	4.53242701440109	0.129330999451659	5.95632547360241	4.89869981722608	5.04669848710342	7.77762065769482	2.90147257137089	0.535034509367019	1.74457704534522	0.219374165411907	0.0291634989875019	0.134093568658751	2.85362543904984	6.71767554726486	1.32347483970912
2008024	17	7.43915511785659	1.95328058586076	0.333330145028379	2.05628817899965	4.23836075820086	0.0605488978989424	6.48984831012833	5.60631860251606	5.62898474115532	7.63478634212752	1.71026866420198	0.538086465384242	1.85643050033248	0.185461187424041	0.0390841540854996	0.131739196800977	3.05009100865434	5.98575164464582	1.43614689968276
2008024	18	7.11231933482687	1.68877126806409	0.279591130704563	2.05623832366308	4.34430312080687	0.161753608347695	6.00182519087399	5.75429929968005	6.74407095386967	6.18515200487223	0.995130249471155	0.602787044309387	1.69868486181862	0.171663566468093	0.0502702036397246	0.122613070269735	2.96988588096173	6.27555618393916	1.57661761615844
2008024	19	7.20188189965439	1.73220557753138	0.188575603935331	1.80353609022639	4.75944577603388	0.57374409832942	5.3189744068495	5.30823442368511	7.01834440477144	7.05165511266634	0.670566330799079	0.754475765741458	3.40630539609654	0.145823805708685	0.0583167206879543	0.0944137789614971	3.06281146912989	7.18122542809459	1.57551738889642
2008024	20	7.44558166712999	2.02924968046989	0.0495770358056191	1.80542401830256	4.65789034459178	0.803380004794732	6.07724316935926	5.70971331862946	6.13516850698436	6.973536517411	0.4468734107422	0.845701901757123	3.2151043736263	0.10031540286116	0.0625320615267865	0.0444623607316798	3.18604690962789	6.69710564971685	1.56557503815735
2008024	21	7.60133906830577	2.2765515828579	0.0186243594472277	1.87674867738547	4.49780542230972	0.818068959329986	5.96561131455648	5.8159611359948	7.31022785599753	6.89442573275859	0.453078448427794	0.618867735796569	2.5250837681488	0.0949267143166101	0.0640307868760909	0.0152919678047707	3.23819421107896	8.67356007133597	1.53339220073657
2008024	22	7.39027848469178	2.0891919721529	0.00722998095511818	2.0027192724134	5.05600693513415	0.686158781233095	5.75531510479678	5.87120343836539	7.3158719216613	6.77245315396621	1.40678448992791	0.325050335080461	1.60207592467893	0.544470563084481	0.0633784725369707	0.00445478862358323	3.51978319807914	8.59503289509795	1.440853197967
2008024	23	7.64178204186329	1.98473428737341	0.00277694365577412	2.25313017609735	4.85515118364011	0.656982313972829	5.61476050590275	6.22521057480301	6.52324725657093	6.22111058614194	1.84670816681658	0.386774499666092	1.73330602858404	0.450007313573492	0.0303663387460307	0.00463770232658905	3.78770397136277	6.36037445861047	0.932044125052329
2008025	0	7.76556459599401	1.74125466489699	0.00167458351175543	2.6015498576332	5.00057184557641	0.884242188950635	5.12993879749538	5.90723772696972	7.05859574846252	4.5761926610343	1.00939573829435	0.516715463462489	3.62883334020058	0.582626538129425	0.0100449256817816	0.0829576039329453	4.00783314404037	5.71618153538988	0.55735878116189
2008025	1	7.07807419124414	1.47120533441943	0.00195659815707047	2.6858482300043	5.03360067616023	0.905136436442477	3.75515649445092	5.9681980854237	7.0381001194028	4.83284689445085	0.858620972282511	0.307657583224785	3.22187271801669	0.830962019948814	0.0191817741621558	0.213026942125881	4.03171459653018	7.42635964866255	0.486976609300199
2008025	2	6.76918554096156	1.13276102189816	0.0140250008761412	1.74703453223239	4.99694330183856	0.824651653428581	3.79295740922277	6.13582557539395	6.23810025750665	6.42019024949646	1.08963659313879	0.25816723842925	3.03192242380992	0.917373393947293	0.163076974750642	0.286691287703074	4.15659100187756	7.38897553070036	0.477793942574396
2008025	3	6.24113772410207	0.960964261279217	0.0489408310223113	2.11922489571138	5.24980911966091	0.73810611196117	4.94851706330105	5.67078228321925	5.20960638970746	6.1818873006103	0.670730681686312	0.293464128329701	3.55900633868662	1.13796250536641	0.323968020337539	0.354909922888866	4.26545542136237	6.33921120921358	0.50825120046899
2008025	4	6.09550230632086	0.715805844151352	0.0677188874432184	2.57569327449336	5.04413526351638	0.44310820495088	4.78696386879446	5.05653913616287	5.20252890907192	5.98346739594771	0.659315485600122	0.459369530388362	4.3840074674983	1.42728798597446	0.359952725458999	0.447530970414328	4.54800732648168	5.66095397032615	0.556500434110811
2008025	5	7.72961027564722	0.666289825251303	0.0730806542150887	2.3175208244324	4.15725838752226	0.308614263242102	4.70720193807314	4.95152086734011	6.01352018523674	8.07429167138698	0.610223664820474	0.607833861386897	2.52465137702052	0.842965382440586	0.501116679875085	0.484530457369431	4.55505779377822	6.57373868184128	0.55728789447397
2008025	6	9.25721083034413	0.595437501912485	0.0618415999576881	1.37166819870156	3.61462653974047	0.303279318862674	6.2399787221835	4.65175393796282	5.7431335683276	10.1508692727179	0.607596698693662	0.429129582840296	1.09591863119163	0.855541589703516	0.830371308182433	0.552054170437447	4.47623935856031	6.64062463142062	0.540125428198516
2008025	7	10.902763012251	0.656171821934103	0.0540957158444626	0.857573777711996	3.50295220346544	0.447097383281215	6.74192275423251	5.29178119843618	8.05603805676212	11.4296683186979	0.763220622916978	0.490515677323879	0.906964720037303	1.08547020940766	0.684679148008284	0.748408715850886	4.36198487972273	10.2243115316012	0.499942101473178
2008025	8	12.6130279009424	0.743979996358228	0.0492772479209337	1.02709446138296	3.51631695131238	0.44299470535213	7.50136855503732	6.15067362196146	9.30727642583468	11.2719084814488	0.965890909657037	0.623030100990899	0.860046685370462	1.68840466450204	0.712199237978675	0.921845287868857	4.28714347325846	10.6905471257554	0.872835878833026
2008025	9	14.4349622971725	0.816864496671055	0.0494550514486413	0.985834989846716	2.69222748520384	0.4874384246744	8.76233564598503	7.47689294702087	10.8139041547329	10.2674891732217	1.05541220374163	0.584280012724373	1.41902307096313	1.53489639615431	0.817072835735661	0.896088766733939	3.22808359019276	10.299079130636	1.92703998652885
2008025	10	15.2591678142612	0.954348310946139	0.0694283830189882	0.79929543383882	3.25633124307075	0.449007970731582	8.60950415736703	8.45364013175133	11.6023994970975	11.5035426294282	1.01778529182095	0.481803450408638	0.986561184901247	1.47935897671152	0.795851667423839	0.802913108975302	2.45604218530241	8.24414957633559	2.15906074335452
2008025	11	14.3577833262017	1.13266557299332	0.257854532275922	0.796028352849012	4.83347534433449	0.377185222379317	8.97991692967513	9.45177951833777	10.9131877325447	11.7178440555852	1.87029738784521	0.445938016615644	0.420041908106856	2.37976090723307	0.770901003858064	0.622528826463325	2.21703029592828	9.05522671470916	2.26706701217065
2008025	12	10.3957730534215	1.14273020412995	0.410267609747467	1.05105370555325	6.5241073032722	0.371809202486589	9.09447013028949	8.74953514559659	12.320202020682	11.5945853496366	3.20916034003405	0.411045177978364	1.64951294784899	2.70037172161361	0.697583172591964	0.497498758863697	2.4465246942833	9.82406346146687	2.29103411305412
2008025	13	12.8699490620177	1.17178858728172	0.443174224556115	1.10294152942983	7.65255349207821	0.347546021713679	9.0389734076858	6.89499248437524	13.0233813230281	11.1203594040892	2.83386394948617	0.35192276201414	4.725894399814	3.10287965366674	0.997470092233032	0.397825416292777	3.08409065066129	10.3060119458098	2.28066895477961
2008025	14	13.7708695483157	1.17879474422017	0.419904340056243	0.981457791478886	6.80094438253185	0.357783496806432	8.21708214655829	6.36553736853603	13.6352443388242	10.4063285713154	2.12011185750867	0.367130876479543	4.91015102936533	2.6275450488783	1.30186297713248	0.415949810537044	4.57222821125146	11.8278106512074	2.09793169781888
2008025	15	13.5650258337191	1.21254741739816	0.389277197579308	1.02527797151146	6.190577424127	0.408808260508904	7.42586101102991	7.74799629625677	13.1312012485862	10.0795010488427	1.79784660299146	0.876504721702804	4.23340849146255	3.27202041704493	0.973411891915229	0.284682296126499	5.331353024796	11.3904261902605	2.06462733518775
2008025	16	14.0832786215088	1.28890377188033	0.347347241820249	1.04145888106774	6.53750645330504	0.378440020872514	6.64337258478341	8.36150393562296	12.0787769927022	10.2804264502988	2.41072824635035	1.49576402258647	3.37496695361	3.24150587971634	0.782425784723418	0.159124683019923	6.03378117768008	8.80376233670507	1.88063296651381
2008025	17	13.1280005064781	1.25826178776281	0.298113253620035	1.08000488548396	6.802101145924	0.333481935950248	7.84842395444254	8.44449727357714	11.5895730215705	10.8139732588936	4.91440726598807	1.37456122534091	2.81466929979241	2.69390993594142	0.605521974108403	0.139040783015553	5.59448074950742	5.43899395421172	1.52433973782416
2008025	18	13.034017043254	1.13453418457035	0.261884249029127	1.24846876394303	6.11453203549698	0.30800168358715	8.34999528172992	9.96385458748685	12.2693704241095	10.5623529924742	3.76548585242234	1.13303686667381	2.46808316437516	2.18508030564739	0.424959863162167	0.131555666866254	5.22698223464728	2.62499757268519	0.934440709826694
2008025	19	12.8258409156103	1.08790008301808	0.235545731223794	1.31765587341131	6.35762979892227	0.28442564143532	8.05892837544086	9.43981398800164	11.6162691220168	10.3338537441575	2.55238849044771	1.04228005027626	2.16188122589255	1.77854919407732	0.285461240015815	0.138999088663596	5.53483668236824	3.77253204184136	0.713488846680576
2008025	20	12.0815145295679	1.16434498012538	0.216480829135843	1.37865176919571	7.89120054486755	0.27058112582529	8.04167921254645	9.55978916732126	10.9590852663806	10.1101852771011	1.79929818718393	1.00713373896353	1.94426757879178	1.53768327683102	0.199179174112735	0.146684034136153	4.94574727020458	3.19240815071028	0.686932785880943
2008025	21	11.4822953358957	1.35520487560942	0.201357402795109	1.84857524902013	7.89793740725235	0.274758421737637	7.89686689636647	9.41568279332574	11.6711348305148	9.8369443662016	1.64881214293602	1.00335129497108	1.69155744407969	1.42018350218088	0.236696234471029	0.152328291465936	4.71345795711778	1.17313264261951	0.561634479452897
2008025	22	11.2589594163573	1.45209864053347	0.190419784822933	2.22936830548164	7.94070246402094	0.349168064033476	7.81679022856293	8.76153010314986	12.5194092495179	9.77070357475427	1.65528699627983	0.951806245011976	1.43387822471082	1.34399551754083	0.291435359652737	0.214247562174627	7.0024108144241	0.427271780150615	0.578394619366455
2008025	23	11.4740147411863	1.4809583432021	0.186528677565277	2.15901675545842	7.43804996358926	0.512601697662519	7.66755171509603	8.48755656092389	12.9490402079829	9.01330190292461	1.47031836958915	0.614825679360049	1.2779800790997	1.10265098730948	0.288442131828358	0.259963707188827	7.41679207047936	2.14355461855005	0.619504969661222
2008026	0	10.9582379261745	1.44355833513886	0.180008001962944	2.09400597853407	6.85876883229482	0.708241717856772	6.8226336619888	8.25364532279736	11.3989489175426	8.26146373659387	1.30395138685342	0.338219701551933	1.11587114815704	0.843717378735433	0.331073705276557	0.269140598116507	7.07576408954363	3.34090914261996	0.695971828617857
2008026	1	10.4036051860673	1.3488996860192	0.169277175047952	2.14320719379178	6.42474644123768	0.747510557294963	5.83347099978234	7.98352100483228	8.8968574224734	8.29850705403186	1.27117028109294	0.364778436363372	0.936523894704839	0.606283778182324	0.425194368203837	0.284154962677336	6.82329070713391	3.6028043567104	0.803964236585303
2008026	2	10.4715782705097	1.39729881068064	0.159601393698547	1.98003580819094	6.19981869259934	0.682654050589813	5.60606769276478	7.54751359603911	6.6674066700257	8.43322564477207	1.25623798502231	0.379594876512742	0.565696386139376	0.246497983406122	0.289762442509381	0.320551385250526	6.48682932184624	3.48973683093508	0.895755527343149
2008026	3	10.7294053960344	1.54334500158856	0.154101859824214	1.75553411754869	6.04256929609432	0.624214072085003	5.46091423254588	7.11274607347162	5.46062640000356	7.28390899379838	1.30087727242909	0.357338716280909	0.622022219676502	0.223386262937465	0.279407938469329	0.392971430667278	5.71545067847728	3.38516179007145	0.999157031742973
2008026	4	10.5143358572268	1.61484199690967	0.152855654316901	1.65274281669465	5.78069299790928	0.710301790166317	4.04080853081569	6.91575591251283	6.15272066586955	4.05190958349836	1.38195848163548	0.336244868899336	0.521483857980195	0.219688133290817	0.440001922857883	0.399753090055553	5.32345670658784	3.30769655169329	1.18105569076073
2008026	5	11.3335680862692	1.58241303868856	0.154498459334514	1.6067446559898	5.24176593716865	0.779800406712583	2.06836731616389	7.21783066173229	8.07971844319763	3.51907149596799	1.27461523753167	0.330833195826054	0.251064257189436	0.209512600511447	0.612098481199869	0.341829540490639	5.2093488818799	1.58377780372685	1.29842186621059
2008026	6	12.223286097478	1.51539785344098	0.153117229918436	1.55300719978671	5.0914507697187	0.774377071695474	1.87905692596412	7.12720582882363	8.4792981428618	4.41447930239149	1.23165815114885	0.277136769884704	0.309735030075284	0.207772859557987	0.649225697434453	0.368013391881859	5.01240113174466	1.91039277787563	1.21816472622685
2008026	7	12.0845101057445	1.50700318935297	0.144951201277652	1.49125374366923	5.37771208786095	0.824497449541269	2.36270328499087	7.54787878018977	7.82843944815341	5.1325094716148	1.2103085943615	0.250192076173254	3.16361954303056	0.207809870507532	0.719252937827438	0.404996577842457	3.17417107822311	6.20006449139964	1.09554453336947
2008026	8	11.5776905457632	1.57907829704912	0.132929729360223	1.47426560216482	5.43677188318368	0.90340817423054	2.22558317726806	5.63619241043316	6.48847822476234	3.94616588232472	1.20954636205977	0.241900306465194	2.42796894178875	0.229237627286885	0.646371620475315	0.377122863237096	1.46568764151646	6.22775199144998	1.20245662012748
2008026	9	10.9691445481176	1.73961887989681	0.124612744902312	1.588023687843	3.91831310028996	0.965994489912413	2.88035206312906	7.14978634735311	6.27503768426005	5.06911084598042	1.16374568413347	0.27020967662177	1.75786767919515	0.279921749168965	0.633729569262245	0.395320469573254	1.21332904303399	5.74933309012282	2.01232887359026
2008026	10	7.61509242685112	1.79007860311591	0.133462445281194	1.89018493945307	6.16486978841344	1.0606576114555	2.61195112517025	7.14354548051836	4.25792291771263	5.59219699089905	1.08415841329248	0.305667056428542	1.73938790065023	0.861936875083352	0.670386475447884	0.440171532306996	1.29384271266029	6.38594995032617	2.50956618568018
2008026	11	4.90439798622911	1.93607187428741	0.161173761655186	2.42688302199396	6.56828338035299	1.06731653825826	1.9451836362653	3.97793335016139	5.45768692866834	4.689784096921	0.973192950716059	0.276822591899014	1.11621839463308	0.777011813025963	0.519595847611227	0.505103526331638	1.52555649828373	5.31176234351588	2.71327287232624
2008026	12	6.07602358319102	2.27766651481923	0.225023475980686	2.74563658479768	3.52195359463164	1.02124631266504	2.14778752705398	3.54855174728809	4.59855653314145	4.82550387362498	0.872173334689476	0.233157480881699	1.24744923231344	0.498026926250165	0.384457469661032	0.554417854549849	3.10060042680442	5.40765673787389	2.61493468072764
2008026	13	6.77439779200304	2.63945672661561	0.21938404224308	2.97349802306092	3.16749234270317	0.959954618938819	1.83790053526544	5.17473983599482	4.39667950860189	6.60225044337098	0.793011569817556	0.196188083888493	2.78361931633879	0.32073831128866	0.342851044509225	0.555593909494808	3.6978515653595	5.0441897211253	2.58352559069496
2008026	14	6.75178024902832	3.02019535601338	0.230586774267134	2.87912878015914	4.27388709533952	0.969197037128714	5.41613223007406	5.36248240373077	3.55381910016593	6.76024367194288	0.723628761001837	0.179528758058649	1.7981289870174	0.249212349280931	0.428074470356387	0.534336932674953	2.38981573188107	4.18559589499692	2.43898101773091
2008026	15	6.57173642458774	2.99233148867027	0.220408512523089	1.15514804839524	4.24823999262914	1.29065314726376	5.68237003226045	5.1028912250968	3.76204152079399	7.06096426898284	0.708100700075658	0.175402119283203	3.10243166518781	0.246779068364821	0.348157712259456	0.579530432498479	3.26125083247074	3.79906079675281	2.2670793616641
2008026	16	5.1918210181477	2.45464708815794	0.218334582755336	0.732456141218349	4.04347553854502	1.65729406366825	5.10861277990858	5.45351509887867	5.60450095904613	7.99961655272029	0.76337262815897	0.180173369585362	3.9806585546892	0.358500311787462	0.449409430527633	0.575737343654983	3.26880233297945	4.80057595857407	2.00131680735453
2008026	17	8.25007931215756	2.34293119429207	0.263801505660353	1.57802738376087	4.44995407146536	1.89076338051113	5.59684124642612	5.89765576638989	4.55789142712766	8.67218645533843	0.859490193421667	0.180889753678159	1.93898323616435	1.3801060677328	0.66523190485926	0.359131958050039	2.97863539657461	3.71768041822539	1.74535395559528
2008026	18	10.8507215643973	2.97045247068413	0.235737517995605	1.87778494383655	4.8472203087196	1.78799242556434	8.12312392198204	6.06794965938435	5.62480020754141	10.2741264620245	1.37250208507588	0.173483832998274	2.08089907592997	1.07976712943249	0.675074076162068	0.352094446656417	2.87669928140938	6.39317530597023	1.61506153846521
2008026	19	11.5071966051463	3.39444403917796	0.208285948120217	1.51898834775423	5.91500926363644	1.47662936826974	7.64068094352835	8.60174552120253	7.0099479895358	8.659913117095	1.54957181752388	0.159648952632466	2.03144099888943	1.36382719727054	0.597145122997889	0.427376483797567	2.78061460397986	6.15634795385839	1.52086106757797
2008026	20	11.6814474848179	3.29701640151759	0.182708471590084	1.54198004688138	6.40212893987077	1.14420703497771	6.47509953925972	9.6945703630323	4.92546862267873	8.18201322178892	1.81172256046778	0.146650525287016	2.08938848954115	1.48918682429414	0.523483115598073	0.605982586431712	2.81243267198679	4.69697126217304	1.52390922966294
2008026	21	11.1647148196412	4.0887175145404	0.161612569782832	2.30163084961178	6.92539540363179	1.09657665105662	6.34499396235911	9.55068746819575	4.86499947970273	7.75988481941115	1.66456257693255	0.133227330370217	2.10518672343861	1.54964018621255	0.465713580664579	0.471646157462194	3.21754469060418	4.61482786620221	1.35296739764102
2008026	22	10.032428289224	3.97467376419589	0.139193343021002	4.52600074282618	7.3388117523877	1.53881184593765	5.66509824404974	8.80080542848274	4.6308583280949	8.15575516380197	1.63051085291047	0.115259946046934	2.22007332857467	1.57983624363386	0.703138566151284	0.286602499065923	1.90481753334744	5.63712497299082	0.876119839768204
2008026	23	8.64886259786784	3.59902848231772	0.124593084392058	5.26303830580663	6.21193230095561	2.28510268228383	5.26854072731934	7.84245055848551	4.19909148965178	8.55324336817065	1.80772057613219	0.0952234526963639	2.32649259843937	1.40239090194641	0.661829087740246	0.157270188309734	2.71935730816423	5.83835372812576	0.479017296901502
2008027	0	7.28893740629808	3.30097052959886	0.116014464563229	5.19707183861776	5.88895117780504	2.56134373824545	5.91674201690187	7.11496125310863	4.06253541379912	8.4203242000228	2.07680671846396	0.0773751960633305	1.81922677223729	1.00864341142407	0.699546214596693	0.290424815402306	3.55992987655846	5.2490006798238	0.543970154377651
2008027	1	5.77696758884875	2.89986795729297	0.108590145533739	5.00212005074985	5.68608173912469	2.38729230688516	7.29235458987325	7.08121572015677	4.25436535776416	8.12985717405475	2.18791861021108	0.0761243506865516	1.18736456442667	1.02102507425479	0.8307162404815	1.32133345215166	2.8516286172823	4.99391562819587	1.18680609686471
2008027	2	4.60880234251201	2.42756037742898	0.104167292184539	4.57448408668511	5.4690912284671	2.27085826431406	7.39000709933467	7.12706555863585	4.3621628478309	6.97312137907977	2.14618716869166	0.101454555293597	0.953349544212829	1.11018948986897	0.87658544233247	1.48285118653053	1.90985611856691	5.07155408900205	1.5241648994441
2008027	3	3.46452339486985	1.82000365166696	0.17157802135906	3.91558515930458	5.96745156963919	2.03718727657824	6.59434822221437	6.63176365307387	4.81942983822664	5.61967078681317	1.94673452212784	0.190859879360792	0.817526916094323	1.03163294954967	0.504784278696906	1.42886115607681	1.62418740033899	4.93229518275763	1.50883735790572
2008027	4	1.58296373265887	0.700740665708978	0.150051361483585	3.19036291314327	5.97929167640163	1.55280332183319	5.27246747690324	6.01395776223073	4.40712162573137	4.94007324620268	1.62253185307908	0.199354665780898	0.666172660771773	1.02100588594692	1.59628450780469	1.51461957453306	3.24748520504898	4.1890905341025	1.52262988391375
2008027	5	0.880853185006945	0.238280568142898	0.147284843810901	2.55604639369002	5.91732987942115	0.831049940491599	4.03539776463611	5.34786642925203	3.92666272630306	4.60541265915318	1.16529945480954	0.166353710489823	0.601497407493381	0.579036933471305	1.29886454407733	1.57984502755278	3.60253223466145	3.65654768548854	1.4792984475621
2008027	6	0.561882402301261	0.0665275648129071	0.178043074070404	2.1610780198017	5.73028359727792	0.302367459267468	3.30912840572805	4.77711587037206	3.94428775223547	4.28423590674887	0.964557668109639	0.265361046734411	0.592050879110652	0.226398618376875	0.933352266206392	1.42570400093992	2.97023913784854	3.40399625960478	1.41140970966949
2008027	7	0.431775145314086	0.0367906882750073	0.190187095011817	1.78352448355292	5.07794728325231	0.0702153590918176	2.95951685303767	4.36120161116102	3.64763380160092	3.93301032412059	1.02009410935774	0.399238638887593	0.806661532032087	0.21991383682526	0.717398374538185	1.20598995267751	3.33593622728767	3.28735813969679	1.5741766764123
2008027	8	0.690150418235715	0.0314651569818792	0.222812278143354	1.32119384122996	4.45498806682955	0.0124738268615951	2.72521051454436	3.98645932261919	3.31010189551779	3.5419195057748	1.1576881507303	0.360771746690973	1.09964401336985	0.208358762734639	0.575963588542338	0.976290295742025	2.96306256544099	3.17467446125002	1.9180420553473
2008027	9	0.949264738267074	0.0255535201860199	0.298617569134903	0.933877095624502	3.92830338007325	0.00355457483806461	2.60454152871571	3.46925872527619	3.14004715548358	3.16833841440049	1.34367901141449	0.437718214319776	1.3594433996993	0.206364127210011	0.651787800788731	0.757120846176438	2.24578747614317	3.07264106704323	2.39546519649963
2008027	10	1.1046614707273	0.0178162262234891	0.298110887979528	0.977761381684875	3.44273664885768	0.00268888931504106	2.80908696817021	3.25133260785754	3.03689615540029	2.58746288480034	1.90664510832217	0.354864201391907	1.74727638613079	0.226074149733861	1.02452172912812	0.563288067356428	1.97001027229666	3.09320688827092	2.94194938612787
2008027	11	1.1463050660416	0.0140999453184624	0.266345232126575	1.28849841606404	3.01196561309924	0.00921484590678634	2.51823136689843	3.2184352636028	3.03686517525813	2.06309653984642	2.81673161416164	0.289619648370636	1.78105271056944	0.229101990704402	1.05073328132983	0.589855804662794	1.79041094490937	3.23276658403731	3.48283095332219
2008027	12	1.22504557279781	0.0513677397941977	0.247584947620806	1.51432659447136	2.6482338437685	0.0242155597968661	2.3386984827441	3.05685492172731	2.95070873087359	1.77849012541596	2.8114224571749	0.280459618470183	1.8341556123825	0.24789110256182	0.614464241847043	0.777017488077036	1.88129047857204	3.30596876723691	3.82294927206157
2008027	13	1.46355584996123	0.290505583167247	0.226551644539064	1.32603892486876	2.34761688789658	0.0324124316491032	2.08246448871368	2.80460267642779	2.84172453000758	1.5251927963088	2.44478291960014	0.256823743531212	1.72461981446179	0.268111156520439	0.443532594291416	0.894869355312198	2.1126832002367	3.28457704180858	3.74398999008252
2008027	14	2.1562489329129	0.445551175512296	0.205181228800424	1.09594189375214	2.15121509083571	0.0351807412061012	1.8255948431481	2.76776780674221	2.89875273316389	1.3755777720465	2.24052759713309	0.276894676735167	1.5052126829277	0.275631773911164	0.601453637589795	0.873518228941339	2.10740076066723	3.18514342405042	3.45441049342364
2008027	15	3.88352609176919	0.409099443033618	0.182852066556168	0.95008606022972	1.98539995142298	0.0554944939224481	1.71257920715583	2.58302590945127	2.93110563516153	1.3910407708918	2.21333043264675	0.335762326327249	1.37723331035212	0.277901631583907	0.936668145520366	0.797980147493654	1.83758739411426	2.97843865249067	3.23160912005941
2008027	16	5.13320929553363	0.608085765285523	0.157935342995741	0.790254790997388	1.83804068905979	0.126505728459612	1.69860052373152	2.51174649042339	2.90778696446244	1.59412392098236	2.21684049461098	0.384334506428464	1.26620647466413	0.27455911260063	0.862016751200757	0.819045563192652	1.33902197498185	2.64715493362884	2.91013963244357
2008027	17	5.18973982728434	0.842502874053306	0.132957274011632	0.634488238724573	1.70100645139671	0.248539405460025	1.77449433370849	2.47281654414447	2.80651209338512	1.95597341770921	2.40957411357755	0.414322628854814	1.17105319863073	0.267025238336982	0.377219589398841	0.870972337662472	1.09213066422761	2.41068890442788	2.77638122112451
2008027	18	5.48311313191064	0.972376480320839	0.116293521053113	0.498079138750466	1.57635966385056	0.379942908898451	1.6592502493779	2.54373412743712	2.66289544801256	1.72909913044082	2.51657370371774	0.454841333248656	1.075558402006	0.255034679053366	0.210186434328347	0.870440401411782	1.07483467924101	2.33842090266757	2.65901066147049
2008027	19	5.58259987573488	0.957318440923518	0.109600785839697	0.506653851715239	1.54572400562993	0.517777299361907	1.5356655877514	2.7851678457375	2.49768457146716	1.6024223748681	2.45050199272013	0.50549125075958	1.13875102673	0.24360144893789	0.493984688195244	0.85398665972111	1.36355213742287	2.24950597689107	2.57942905669026
2008027	20	5.76161851898184	0.856209320063858	0.108999849072951	0.506859986188687	1.5063551052345	0.550398959120275	1.38412524148936	3.06723952956478	2.35339280827761	1.52218204214604	2.26390116990677	0.57061599178397	1.22090230406914	0.240472100115194	0.854685780432485	0.875943955783325	1.53510008666616	2.23705432122627	2.54843614692276
2008027	21	6.03016128660816	0.873740344379854	0.0979537135600179	0.510853025152852	1.48623011684876	0.567396445473791	1.23224718846645	3.32436838521248	2.21837057580364	1.5722149123996	2.22786185561008	0.688005457192013	1.44682062523695	0.237679798668372	1.00993311394554	0.865590741155881	1.50068622354819	2.23925775639189	2.46872021022387
2008027	22	6.61066337499317	0.934919355378722	0.0905800504580691	0.543317750420313	1.42790848418426	0.535828520570969	1.33989037933629	3.33772773498527	2.12252645275793	1.845768905415	2.17143990077509	0.808141372559594	1.71747831948612	0.272579365091339	0.866715107808792	0.855965405388219	1.3146990355285	2.01913673773389	2.41766011789313
2008027	23	7.43658936834548	0.988051024906467	0.085030926657648	0.586420208724759	1.36229033101682	0.535902417171635	1.24922420796984	3.23326351278503	2.19526860760047	2.98726427010098	1.95312773769701	0.862239165237802	1.80802348537936	0.483355551726624	0.734517578946619	0.856837273385532	1.19455794650852	2.26193227258561	2.31622900255876
2008028	0	7.44223040488956	1.02831173734088	0.0793049771456604	0.623701670313262	1.40344840331244	0.608991481821054	1.11738208415484	2.95549105786554	2.17091152022859	4.34226520478302	1.69344943284603	0.905623646853421	1.74611482866328	0.654656905905099	0.642588368859439	0.962012430486608	1.10341606902569	2.30965316385166	1.95180022978416
2008028	1	7.11903812625911	1.13005854472829	0.0735564464009519	0.640772071006391	1.57674663289624	0.597082231919277	1.07978939106924	2.49714530486245	2.14162824010806	5.89641289231052	1.42025032578035	0.922623055712484	1.70322459014038	1.10838258690612	0.61984973384824	1.13058019321998	0.981301991420777	2.27886661272609	1.53631836776933
2008028	2	6.15877336065924	1.18509107746456	0.0690653441837559	0.615496051445743	1.77358580539276	0.54479745716969	1.08324443976789	2.03964002892313	2.15126682917315	6.32931434304787	1.24006108914221	0.894794939841186	1.6668493040045	1.47008983769254	0.606144875554155	1.19665247690399	0.863962836642734	2.2009734229289	1.24367859754106
2008028	3	5.02905379131003	1.20641945638101	0.066728015026485	0.5847663651753	1.94263441231271	0.479991469150675	1.40015452740131	2.0385695006301	2.23539417760389	5.65284518847365	1.14763482536446	0.872047264765833	1.40775496156098	1.58381838024095	0.572749729859417	1.35176514759042	0.78433555620623	2.12153426660803	1.06588879587492
2008028	4	4.31282839691706	1.09845641038463	0.068480442607068	0.550998244184307	2.06994814455221	0.393668454000088	2.64654736334725	2.68500351357908	2.3102267940963	4.61384524204012	1.08163325684906	0.858122559138083	1.2307529395579	1.52572272972824	0.654879845713925	1.41333782357749	0.71459457887361	2.09042377853542	0.985646451016719
2008028	5	4.11360209489611	0.886213873434171	0.07586395796277	0.494950147824386	2.03559234814652	0.316206609978625	3.74927770184657	4.19699661145382	2.53953947358175	3.44490500232717	1.03938541026544	0.823753810383202	1.20706621460867	1.41986445781881	0.622794305550437	1.0890099111705	0.65894827735379	2.2621728069645	1.02650237566731
2008028	6	3.9976656645413	0.928644049599536	0.0906531206200885	0.600688870307693	2.01469922581432	0.245444128501955	3.71473033261948	5.59240844822168	2.81017522186003	2.92681114385641	1.06800012658075	0.670424575330056	1.24332779897137	1.28732591861881	0.549323622920952	0.915715421889964	0.602378440454262	2.64493970649299	1.14344198871597
2008028	7	3.82476087017622	1.08600940059556	0.109739290636253	0.612450041172546	1.77839375761276	0.182594682919706	3.1293411910886	6.20292058057102	3.32104795788625	2.37328908114219	1.13795139373828	0.662113513043521	1.36165827668778	1.151512424302	0.461483950145855	0.653700876668051	0.558008199617938	3.53789636634897	1.2369244851571
2008028	8	3.25485541548836	1.11211222841651	0.126686324740151	0.4913204507854	1.53038129652543	0.147734625587442	2.26191531595116	6.25685652924425	4.91733022814368	2.39942741029899	1.1972664038703	0.65644105586767	1.30795425798879	1.06330292832559	0.447904252568149	0.441144600403741	0.544423416614748	4.95043777163881	1.3123098589674
2008028	9	2.67920211890394	1.29931378512747	0.137748902656009	0.397627668338179	1.43861611679617	0.134499685711285	1.59051466026988	5.71971249585105	4.8727822048502	2.08438867470082	1.3400914491603	0.653359692256313	0.960153723319494	1.04945229118711	0.411300607987302	0.656178025672055	0.52224756522361	5.21107249555706	1.46790338066681
2008028	10	2.24610729601209	1.36547940377812	0.147634852796094	0.347557867847859	2.32188697678133	0.145861450390438	1.32288588423888	4.56512588079329	4.86828266361085	1.57212417809204	1.63854309199604	0.656365941470195	0.527515021962159	1.03992968210237	0.39527909734964	0.667925972865229	0.495767288871812	5.50180455308203	1.61547757039207
2008028	11	1.73349571805308	1.65631298046841	0.219147416970892	0.297853983610911	3.58296748160061	0.199207289468215	1.28150994057711	3.80044084240073	4.49360907861349	1.38904776907673	1.80961347907261	0.618565659750728	0.285028437687348	1.00845217728696	0.451313930112157	0.743865161777617	0.47850890457934	5.08172022365537	1.59633153674009
2008028	12	1.27319052014452	1.67284286171088	0.349961511252208	0.288832690388978	4.17139626475909	0.313667142427733	0.920500098926505	3.29938332152527	3.55502237696397	1.74337801620314	1.7258649523411	0.618273546616136	0.431730343053461	0.985676611314499	0.515580201047419	0.81172618568891	0.525780897649468	4.16612785056135	1.5758880036654
2008028	13	1.17781822572189	1.31225179582619	0.304911964598069	0.454808524596453	3.97225418950136	0.46551507449647	0.933079184806657	2.59915528681207	2.74456555667466	1.79213162616432	1.54297912892409	0.612341882857139	0.550623853304036	0.969189979175334	0.579400594509704	1.30864217796276	0.575531262926867	3.62805181524452	1.41836220621603
2008028	14	1.18380235955966	1.01441779654702	0.335681418504577	0.934935686793293	3.21067642392028	0.519812754832186	0.973966278257364	1.82025461448641	2.38456639524761	1.80663609467568	1.46562774110121	0.598552177164263	0.277516435241894	0.939525611409753	0.610293266673602	1.20925515274332	0.852248047574847	3.14164125121006	1.21732820437065
2008028	15	1.43569396980169	0.757445463780808	0.315825750946036	1.01327153608726	2.53060116359018	0.528087797902217	1.00819406330623	1.35499000637174	1.80455432295578	1.80774573748801	1.69302542762665	0.645556997074263	0.215586254870573	0.901845420090886	0.440158000865418	0.985947631558749	1.3886847562318	2.56024817282474	1.03251068009704
2008028	16	2.04422010049408	0.409269368882383	0.271119160535186	0.775554996849792	1.6085267973332	0.483458732358563	1.18139670718155	1.05629350221119	1.26964175470367	1.72873408684823	2.05068236104164	0.785149098423806	0.379542326839921	0.868710665201871	0.321601485451965	0.984068675957059	1.41562381046958	2.76751081159172	0.954957839685779
2008028	17	2.19284537954728	0.297339642259746	0.247394662475719	0.612048710254383	1.25736939582174	0.452487739783715	1.14640718333281	1.02578425164406	1.47403003209274	1.62645817520855	2.12232596693969	0.830542158556614	0.631193533476126	0.846464095152908	0.251595492348833	1.07754211000092	0.809633329385547	2.98104126203574	0.857941586852846
2008028	18	2.07633669340639	0.260111290288003	0.235859061700302	0.482621747045199	1.05705957658243	0.456842531832216	0.696388623677634	1.1077765915498	1.56496685911863	1.49153497255101	1.46071939213151	0.783813655038997	0.769154909035955	0.828897617592994	0.207915895256175	0.999115345591305	0.471829131069527	2.886185682298	0.823738123229261
2008028	19	2.00532870440161	0.209337430856951	0.229844045743026	0.387971448604846	0.866486576810679	0.427406300857437	0.53075599709523	1.19598101533448	1.67429421716282	1.62970793034685	1.13849082929067	0.689535064017879	0.801793942504319	0.798753022702122	0.168262683654714	0.933808447275631	0.580553442338621	3.00029093586848	0.824425822217958
2008028	20	1.90576981260596	0.151543257615409	0.220598735790784	0.316927702989579	0.781757907674109	0.464555305654926	1.12077808321105	1.30813972487284	1.8977057749818	1.88252695208995	1.30723997000458	0.625799390051491	0.808807621297454	0.74809146167734	0.14202560109586	0.877933834900736	1.3519195849503	3.11681117776355	0.846766574982846
2008028	21	1.70952378706763	0.1355399326986	0.213501684387295	0.252808422734228	0.813440526326584	0.40451262149843	1.31387726452944	1.40278384891212	2.11284377001796	2.25665577415048	1.39978340895185	0.743316681803808	0.813922915431859	0.680190146959331	0.123096552616986	0.767758538172475	1.38899438129327	2.83431308702232	0.88738305383765
2008028	22	1.61382531457057	0.135554419057633	0.236983173765337	0.210757121658997	0.82775079125631	0.351293435816924	1.35447994301538	1.44474366107682	2.13457273311209	2.74516267644803	1.34020750128038	0.669805794501413	0.919321097429755	0.620652386878545	0.131163941891823	0.627497044928458	1.41688049933533	2.60666804575877	0.940565565214263
2008028	23	1.6707043034893	0.155391408514754	0.283713683268621	0.189375272531919	0.845852195647215	0.305407681145113	1.54699866684348	1.52775298978174	1.84491454058215	2.92922014458109	1.18506884106736	0.546443995395963	1.67962943077565	0.582288384450976	0.133747780916401	0.546350401384199	1.18741526384286	2.81637528035304	1.01351692349071
2008029	0	1.82099135487677	0.334955977603077	0.318313108563967	0.197351478667105	0.94078252056106	0.30578754884544	1.83134246506003	1.56302437606382	2.29681255237943	3.05756997628689	0.961044818741883	0.534855638002405	1.80517441380484	0.556803576656907	0.170022022980582	0.500036571137497	0.959992942032258	3.38225104049909	1.1019213807865
2008029	1	2.08371591031605	0.464706025937699	0.341392556954562	0.232381738846183	1.06947237581677	0.277781883239463	1.90381259987475	1.6049413948541	3.12245205117702	3.16615598021918	0.789332312739886	0.531314225247817	1.04726544828153	0.546328008544385	0.211815343845158	0.47087577609595	0.864819427647246	3.6406503883892	1.18989706279349
2008029	2	2.34896492404048	0.544415905980931	0.370410424112839	0.289150639243121	1.18101252832855	0.24071588853232	1.63567601505011	1.61917219867802	3.25056807641456	3.16709632546173	0.679063753515914	0.518291510966348	1.00579376573604	0.564957787839503	0.242711031371653	0.440862570420281	0.751882214527145	3.66948119466538	1.28673878569939
2008029	3	2.46723238011216	0.599187807380544	0.388052914120133	0.299962479585	1.17022279995026	0.238288464870044	1.16000266241349	1.55594342321157	3.22209812122137	3.04064278443024	0.693510148318215	0.519779113142337	0.975264687702923	0.591546433801996	0.27192477483316	0.410429555740254	0.665715487558031	3.48447879889445	1.35365006439495
2008029	4	2.52000317417745	0.674113735788486	0.382031333953188	0.297261014073491	1.09454779938566	0.250200164695745	0.989106195459077	1.46546229036329	3.23296615133351	3.03090847251999	0.72466293193425	0.507041123684195	0.798604297345247	0.58961642088593	0.493158655099661	0.3786861813008	0.612068860428879	3.2377222531672	1.35330438558785
2008029	5	2.47915980235524	0.773036524864204	0.362312710696777	0.276472682132202	1.03483430033386	0.259336215580091	0.93617734395217	1.49470897681961	3.43981652209915	3.02957552950764	0.682282783006536	0.473564175223291	0.521195080944478	0.57344903392456	0.764442340413059	0.341513595104784	0.606111493026911	3.16922192262763	1.26957736590521
2008029	6	2.31572439713997	0.716795612739648	0.361306830270644	0.263923400380037	1.05504093671062	0.263454018006619	1.0436714370643	1.67398859318222	3.76036061717776	2.80584890023154	0.635177957352946	0.46639042340553	0.659234558494766	0.533748988793321	0.660084352187953	0.30765574677694	0.650897830523955	3.39306591911336	1.12270144098652
2008029	7	2.12757009150351	0.692180162526713	0.399548213481274	0.268465582325995	1.09544918810024	0.265174007968474	1.27553102327521	1.7901055460896	4.12231853121505	2.67534928274365	0.731923450030861	0.509071647216826	0.995417424462077	0.471562946965733	0.400204414799382	0.276989677787779	0.736379888258747	3.72245404570174	1.20499445871091
2008029	8	1.99787315249617	0.693497361337401	0.451521621478264	0.360745678455492	1.18989152936641	0.267935956021737	1.23788085704724	1.83623038283013	4.2113654356786	2.52768321230917	1.01816832611914	0.642366625491562	1.00243841728972	0.404138842881727	0.315617655415138	0.250573575511552	0.820539553109989	4.00386709049825	1.32923969206841
2008029	9	2.0486047681132	0.711282181074965	0.501368208145244	0.517459812532552	1.27592606479742	0.317087171823194	1.66893857893507	1.85653373494142	3.91585400503958	2.47393051453115	1.42844227143823	0.631816885548217	0.796310049028489	0.403616656999859	0.310708982232753	0.222758510258591	0.890843119065703	3.98899243581477	1.31002317943749
2008029	10	2.25151156977741	0.741690018736032	0.53402458563393	0.547746347841188	1.32272669440627	0.412352116287623	1.62066489532841	1.94222173576925	3.35302477281752	2.45423204943622	1.61239097074824	0.527567332407141	0.577803655148389	0.594697745779586	0.439491568822096	0.22687081096506	0.977473159055504	3.59933966704128	1.27620240678837
2008029	11	2.4659377898294	0.724774990928142	0.721010370178033	0.539945518257023	1.3661718877664	0.63906775041909	1.42768042184128	1.94996164545322	2.47870665898258	2.35618628774248	1.71648616038028	0.444386820113116	0.536397370975194	0.537880990611033	0.525945642854495	0.358261353063189	1.0111124869666	3.11596776733378	1.17421079441157
2008029	12	2.70410983089495	0.680050703763027	0.765978037462373	0.567154996915898	1.30789882851546	0.7294948479336	1.26023763388799	1.76522952488119	2.23786588492969	2.40495148413599	1.64187798077649	0.4967247110021	0.265368662810595	0.491145439093767	0.481173868137262	0.504096176962598	0.96241649789822	2.83679848705073	1.09004165725862
2008029	13	2.95395237924401	0.641084358383172	0.817129630636835	0.605042315297106	1.07124103768532	0.805314152482502	1.27160858552636	1.4818196137417	1.93974640618696	2.55154995220669	1.52431224763531	0.555570641435421	0.241745715624891	0.462668387189905	0.461075542855887	0.54815648737725	0.951020406218894	2.61575019859073	1.02362922187191
2008029	14	3.11030996909459	0.639563858651347	0.943812617526783	0.635150185632694	0.815865191133192	0.898221865594169	1.28608616099029	1.30285161619551	1.7866529908579	2.86597730823916	1.46791100745152	0.542292675654554	0.301119734500429	0.478386672273159	0.43475999028019	0.606898595042956	1.01741624681019	2.58059314494971	0.975515944694597
2008029	15	3.39737401334168	0.611329482162774	0.800551607170434	0.651172507639937	0.685960196862081	0.966996246975787	1.3745721571939	1.2203796164268	1.83686209229459	3.08925856852573	1.43623759339669	0.516392081761199	0.242351994355941	0.421640147096677	0.387039124144876	0.635264969887031	1.07345218166589	2.71248247557246	0.957867150974562
2008029	16	3.71840504314232	0.590607838466135	0.673831759372287	0.654705483680171	0.681031964774738	0.974850823632325	1.56541160884794	1.12745545524769	1.90413231698972	3.26734432354086	1.37446352139855	0.531162167883511	0.209280416280506	0.364572471107044	0.335083971209675	0.608586406366204	1.06697333774748	2.90427272751286	0.956346310087721
2008029	17	3.83958747719347	0.567529193490611	0.588770658666545	0.617221583368998	0.719106496366293	0.934004841281225	1.78773536701522	1.01061460850353	2.0113282414825	3.32199935161528	1.20726840279486	0.625438455237794	0.169834473375255	0.344501303516064	0.28874168083882	0.612128039182982	1.05677457574616	3.01688309098064	1.00813205597789
2008029	18	3.918117056897	0.551783561189382	0.52791778998471	0.562142206475009	0.768175860122043	0.876064897493924	1.95811569887559	0.965422271134679	2.20708223431214	2.61323412959533	0.843195877128031	0.707697280268525	0.138481861806713	0.342237015819448	0.246240192629855	0.623887811761835	1.01708595343637	3.18986827571884	1.09607449196833
2008029	19	4.02848091277411	0.543096494924085	0.46905512824555	0.524079036390164	0.811279206071111	0.824299476483468	1.88909478858301	1.00045177241574	2.46963892827751	0.991660515502842	0.711296280919328	0.565716927788134	0.116222646274597	0.339884620333285	0.207545202478072	0.63330484311356	0.884967208651957	3.14899400109459	1.17714986079468
2008029	20	4.08408637430659	0.536491532480811	0.425104239022174	0.496724852558303	0.791790767756131	0.7922026158967	1.51636995023698	0.960474262475271	2.75668915390987	0.348352815691652	0.720776180499134	0.472728793206622	0.102771183856681	0.314150784415237	0.183093171279939	0.63840100814318	0.6504574118108	2.60055119675271	1.09881815521532
2008029	21	4.14649324776988	0.54143019944261	0.395276820330838	0.48468056504681	0.776621955407837	0.750308874862903	0.989932858598632	0.862198320643137	2.83496067368579	0.224101835212864	0.826964968250715	0.413509054952989	0.100938409391351	0.271448227439199	0.17855168027074	0.626532287860374	0.562545055419057	1.75568946987151	0.876948907092261
2008029	22	4.28093745915815	0.669456670870651	0.368809566163492	0.496017551702072	0.79679581719425	0.65415391919763	0.610654380613741	0.812572941203647	2.68763222543519	0.491359144125325	1.09997806408873	0.396982779331463	0.101697747440546	0.226798252746694	0.1837794236918	0.609497748788737	0.591556249514414	1.6894802072144	0.702555547505319
2008029	23	4.54523089066504	0.716173582691097	0.407550740321481	0.539003870981806	0.762672916505977	0.529150326349534	0.369143246798844	0.820524514591471	2.20367585585346	1.19048998905381	1.54084861978889	0.386646967618253	0.109929561637126	0.187444240327371	0.197304381076902	0.595748128340514	0.609679552152727	1.42541456490716	0.645421631119576
2008030	0	4.11586815513879	0.773552484806129	0.43013273289536	0.61543909255065	0.731507722655183	0.467474759951775	0.234016290487038	0.863494831741436	1.69133395304342	1.64365281300824	1.89102684356837	0.262498608920723	0.12083873021474	0.156381282602174	0.204255413511769	0.584689571570591	0.603434878073811	1.0452501884871	0.674463004661325
2008030	1	2.93853343454343	0.795383443227489	0.384919928869949	0.68508400898426	0.726038313763602	0.478851985658171	0.167793608026395	0.934566084140276	1.26088639153793	1.07956601389747	1.88500668428337	0.16420750636825	0.13366408770055	0.136070501868504	0.205409003304104	0.573546625893757	0.568643428843464	0.869999933996957	0.72906454089681
2008030	2	0.998885043887503	0.790900062057157	0.342618298421399	0.719603619393193	0.720265170641206	0.56456370449854	0.267498176735215	0.931179286927099	0.661177693059427	0.718302720773991	1.82435651807816	0.180784531740981	0.144932006544259	0.126298372972974	0.201254299939902	0.555445229170179	0.513973191164996	1.0513214108732	0.77510664101296
2008030	3	0.616366741244421	0.738502610874136	0.313729460176755	0.730758297891752	0.701667920987702	0.697435149937138	0.232340297968562	0.873091894793521	0.293173600685396	0.978604909728191	1.38699392339216	0.508270298153903	0.153412164192043	0.124403798408946	0.197182597816461	0.508116962040543	0.454965215913061	1.22354778875748	0.686107386891014
2008030	4	1.50382004270335	0.648931907715794	0.25418367742164	0.729971100703557	0.689850970576901	0.800677432096718	0.314049488641099	1.00294778626856	0.172691780950749	1.03563116524916	1.03802896739125	0.772927779660143	0.163442736502027	0.125630893906339	0.19513395105081	0.412061568397397	0.432794023632093	1.30883901028737	0.781434249277786
2008030	5	1.73831857025432	0.527639069598792	0.198459710042464	0.730421785743443	0.679276889191215	0.851122594051177	0.554141593123489	1.03250397303127	0.71822319603084	1.0508774553977	0.854253467289539	0.739674635483128	0.252896675544183	0.127155565354668	0.194720663853758	0.310640355095702	0.448305669885505	1.43424735539866	0.924883553713938
2008030	6	1.92148375329865	0.369033271798837	0.160070342627537	0.821831691152953	0.66765547195622	0.862556347470054	0.795049865849421	0.944731931268505	1.54240419678534	1.29874547845141	0.768952579023101	0.472464708712698	0.343066078964094	0.128159161992022	0.1976183068694	0.315042075882978	0.487436014187999	1.34443358250957	0.824844984765332
2008030	7	3.48140062069718	0.250342320964415	0.144897196481392	0.828818060109787	0.687378361046645	0.842267131254803	0.89409270501919	0.64414136034059	1.70667738571082	1.81389515930315	0.724966429086612	0.412105893915169	0.5122090201425	0.126938792828763	0.217778334523532	0.336290328406162	0.583813057511666	1.25428452271745	0.381138766778068
2008030	8	3.56661751882171	0.178231429589386	0.151003283163593	0.823966200725788	0.70453981536415	0.820647614795408	0.87655043193062	0.346341846416348	1.82785884977562	2.19273650400067	0.692494633198255	0.525953131873749	1.28814317804371	0.123862080138078	0.322431990125613	0.337316415612912	0.605919191467613	1.19571073983343	0.825877097612798
2008030	9	2.83023343054977	0.166640484420313	0.293223228015958	0.694408405678536	0.666673140072556	1.06090500208522	0.82029628120735	0.475964674890127	1.89507607113284	2.32211752666077	0.747095127726536	0.77953487692571	1.61310111848678	0.120516175002407	0.500470619656224	0.320254635610626	0.561185195403238	1.22312627695532	1.3547851574376
2008030	10	2.77340683193494	0.183531846595078	0.196724000431952	0.630490798988543	0.542777763070558	1.00489206590762	1.25791704138611	0.707200160407354	1.72576978780388	2.39869416160691	0.714849951007886	0.923391069678944	2.00895033214521	0.118584018375088	0.513056340300161	0.299319634460577	0.529055600633088	1.29138681620328	1.37177026959636
2008030	11	3.21160906464332	0.214774423287564	0.13565868046881	0.455905306124283	0.319400765572702	0.959079265257615	1.74373504441767	0.782069898229271	1.27967610119892	2.30421156755596	0.727917200713991	0.895156755094888	1.52754261050057	0.118378084080616	0.464216957830426	0.277184660644168	0.518943474814187	1.3314324922546	1.4057646654255
2008030	12	3.27727339643323	0.19382475841336	0.115445398248964	0.236569818758317	0.357581217922504	0.670055724796833	1.78608530336815	0.786687670283571	0.850005714805271	2.20591196197572	0.68294832132233	0.875840443344095	1.23072051724756	0.119261192318116	0.392405293783301	0.286535816297279	0.524854290773148	1.12201733114497	1.64255031752301
2008030	13	2.55517890995598	0.137143467498188	0.142109687012342	0.189837154874931	0.761094475281764	0.480154822541189	1.67328142591101	0.825671610637537	0.940089619791564	1.86633145696157	0.684697915911801	0.872007557341661	1.73433809755881	0.126177305753806	0.338988859440547	0.308179547958219	0.513971793235452	1.10735270082344	1.78332676754057
2008030	14	2.37122724902438	0.133351815287671	0.178098075035962	0.177031157688455	0.743783546855996	0.329632824289087	1.51357505578367	1.01543860561328	1.21832519260818	2.19969843243924	0.771708463178781	0.930608441904516	1.50910618109268	0.152599564135439	0.289354761339409	0.311398011677551	0.501315452351285	1.42213934576161	1.55686178382421
2008030	15	1.82936393267981	0.115137339157755	0.159397953959066	0.187566202625578	0.684884714468485	0.232176763309586	1.38451004586532	1.26705483181914	1.67820238691405	3.92262554768262	0.740597683528055	1.09476543420677	0.920910040494133	0.1719382153018	0.254863710923678	0.326549426452161	0.56604934533698	1.78473282010796	1.32307475416926
2008030	16	2.31850763655638	0.156441736751454	0.120276346346736	0.167352739691952	0.671356424868092	0.166973741437944	2.53357318866025	1.31500750560216	1.70144505322081	3.53243488985079	0.73365119578141	1.06026043665751	0.944828058669189	0.215908532474045	0.225158148758367	0.29777709989455	0.558485789010853	1.92528484356403	1.24825005401006
2008030	17	4.81534608976037	0.158877973758504	0.104722038706584	0.164928107114884	0.7309239972448	0.0853197640350534	2.68384262242233	1.37130909413195	1.89425588082882	2.43300350139899	0.65743085606162	0.987698901271877	1.287725985806	0.281144008736677	0.19502764925561	0.29989643482504	0.368979206901802	2.46963229912557	1.27835518005481
2008030	18	5.05171741352429	0.366971379144434	0.0952278468849793	0.188955805399563	0.965796591534145	0.0645126594301239	2.02081266197434	1.26143184634189	2.92293298864833	2.69910083677478	0.605132214185422	0.995878811881967	0.894524165051012	0.366645014191075	0.147441500230017	0.312195365293443	0.236754555048986	2.94738499861226	1.90429168766641
2008030	19	4.9200451502303	0.610984779566589	0.105774496616886	0.16550688891919	1.05531359851147	0.187094975590474	1.78446306618939	1.18524870952091	3.05240277102667	4.05192511539988	0.604777757582966	0.931662668949017	0.796464004268826	0.466445958381976	0.119296086732752	0.316711346898475	0.348127054476403	2.84990193987096	1.98905992310535
2008030	20	4.35408531627983	0.541004991780819	0.118020232150692	0.208188132714116	1.02558865212583	0.216751171956005	3.22194665296096	2.09241655775323	2.69124357131261	3.24566974470161	0.583205323888209	0.856232722668743	1.42112423940435	0.558411583128431	0.104470546165249	0.304524376287085	0.456472304184946	2.56205307231184	1.79768860267222
2008030	21	3.32882063956736	0.484309113656353	0.118977858347301	0.269211470462869	1.06488182474218	0.151211683626578	2.87315414202542	3.11918245099896	2.92254167643202	2.2701345416188	0.534212053818693	0.767214541057211	1.63774791881991	0.606198024720276	0.090788050142323	0.268860884707982	0.503031048753719	2.79291138902056	1.67921886254691
2008030	22	2.52946044865622	0.528761828372156	0.114129435103457	0.284093507999385	1.47014073241428	0.115465511822521	2.04940140824782	2.92136008397456	3.42203843132563	2.00419394059527	0.483681164328046	0.623543164139404	1.27834855365332	0.623610706363221	0.0809966906975687	0.179419874760586	0.538093257422306	3.00124543840291	1.44048789667551
2008030	23	2.43449797545816	0.657677087626145	0.116934286194271	0.353618273575499	2.22865447191653	0.162906291829259	1.42852415775735	3.15744778554945	3.02350324674103	2.32207215537025	0.471601619536681	0.515457026538526	1.2827958450623	0.634193951762717	0.0746505218411745	0.0984215253221765	0.570076505761735	2.88297578982893	1.18779928407427
2008031	0	2.56100756950543	0.664322473462113	0.129010137782755	0.314425977129635	2.0447435585149	0.301721592525491	1.23457127631394	3.12164326204517	2.75934461573727	2.74031079893463	0.491013205726279	0.442204278867269	1.17187440182602	0.627418321289676	0.0730467771100911	0.0809804634103152	0.570453293931488	2.78394753851854	0.974472723675322
2008031	1	2.98723934916837	0.382907135128328	0.1286023058498	0.351548290432037	1.83318897550988	0.362198934613131	1.38265666220626	2.86278563604471	2.32716196043802	2.89488574279755	0.530647157249698	0.414012033668934	1.55013451481442	0.780415519736082	0.0742867028273998	0.2083804772758	0.552248262439082	2.65288748977936	0.785308548649617
2008031	2	3.21061714011502	0.330686793178267	0.133374383507014	0.45790496748547	2.25691032633186	0.345682169162451	1.66595895387748	2.40206309456458	2.17123562039985	3.11695334586243	0.550596756774552	0.38770205893239	1.97429529808622	1.58553255505262	0.0685085422047914	0.19672864602788	0.575379236012648	2.53549473416896	0.646361216511353
2008031	3	3.34884550235816	0.338940813212586	0.143777206410132	0.309802431442404	2.49187362750037	0.229291578857789	1.7850681659745	2.04784752847401	2.05575846336601	3.36772356609834	0.584844014162911	0.404368818746379	2.22323524163826	1.98700186417175	0.0753029238474408	0.295143403789019	0.76625170886315	2.75742239400634	0.538727472612987
2008031	4	3.72852298752183	0.390264377462826	0.141501157520692	0.327131846531675	2.33954807134835	0.16984242672342	1.87329815021252	1.77997172976278	2.20758490243249	3.35069659566422	0.74909339766942	0.510893788554479	2.52016115000329	1.44013004568983	0.104265663293015	0.332347057559052	1.18419786494689	2.86445893220269	0.440291574424261
2008031	5	4.24790104202082	0.426186280270226	0.142207168169762	0.485821371992007	2.02426306266552	0.165908969477764	1.92085013646325	1.66454644867964	2.40046733925826	3.66038955509852	0.82348225463041	0.566581296395173	2.9162964986915	0.951530436570829	0.136335960698343	0.310877691792691	1.37053009155905	2.97535605487092	0.340662709994051
2008031	6	4.7626110886183	0.518499147461377	0.128903288423611	0.65420901458939	1.54956603527474	0.17593989704472	2.04441656451273	1.69679139363873	2.67659833358148	4.17796000613701	0.828024119445362	0.51101492408912	3.65359003345812	0.582589550802489	0.160388212992403	0.295161652755474	1.31532957268869	3.20517172449719	0.269300045990196
2008031	7	5.015078285722	0.814050573515889	0.119996142573369	0.782659262002326	1.2886712370512	0.204217838707768	2.40128671065543	1.47663884205443	3.1143360322934	4.37422898624707	0.982915718981655	0.546413548052729	4.51864856656637	0.467749807383954	0.165174939003865	0.343746046950552	1.25560701668866	3.37703977837021	0.293762461140425
2008031	8	4.70747453600263	0.97599515040054	0.117623862814377	0.650255680486495	1.11237112136257	0.231678736840252	2.67571153968681	1.40362679198646	3.42472120465616	5.17397961806864	1.33485190200005	0.855479990591711	5.20351396473427	0.443947932196516	0.20371082463474	0.405815118004019	1.34498915249858	3.39137252510295	0.335520435380091
2008031	9	4.49446675903025	0.660558049143955	0.138875864659817	0.842378534233247	1.06063612589042	0.463767180557847	2.60863663928228	1.26481834099589	3.91672852504357	6.46038106676689	1.5774831467302	1.00589566491099	6.65457059439119	0.444815966107762	0.291121130394524	0.393829545049199	1.57980539490048	3.82387387182058	0.371461604887371
2008031	10	4.56624635600169	0.369619329360535	0.160936299142483	1.1501488710372	1.29374281316121	0.744400529622197	1.82503922624609	0.949487097983969	3.73617025036901	6.26898434224654	1.72928237760584	1.15300050665056	7.92131951793875	0.590291665128456	0.341514706075419	0.37196876523694	1.61535190366367	4.46681213354724	0.558510162886219
2008031	11	4.51075087253361	0.248353880581783	0.213101069251629	1.08811612541963	1.13568403789049	0.673701795066134	1.7365041245334	0.741179963024294	2.82515386662734	5.38173089799006	1.79532402817387	1.1154179334262	7.73183238788637	1.06291286446768	0.264944542683152	0.537802329477042	1.60178851674142	3.88926480644253	0.614668024198621
2008031	12	4.76839151013797	0.177097228568282	0.196182662925287	0.754405852736855	0.789202798579208	0.718736703825049	1.95224459132663	0.729092422089906	3.02955743503407	4.8759464302329	1.62027989278323	0.914374807904042	7.20660940879063	3.18075751997393	0.202815522143363	0.494345548208153	1.32565832124951	3.60532524610553	0.357185033354932
2008031	13	5.44637885359828	0.128326496198187	0.14365367199064	0.458936892936646	0.486985953705529	0.400473932229916	1.93378470288137	0.745605789583005	3.32678650091737	4.94752529314311	1.15556092441907	0.67477196098921	7.16456019619502	3.36069710497846	0.176139190811645	0.475060243758205	0.8350520015216	3.93869672805744	0.571388715479968
2008031	14	5.80956389907818	0.0954729235769154	0.120529787419413	0.287253364976308	0.34159825027648	0.280049705036365	1.8734257125457	0.790313096174435	3.77971347327902	5.36397398298852	1.01677611426505	0.400013531046942	6.78846960781206	3.3314201123544	0.163067406199799	0.437119645381655	0.856287832947216	4.43249910324815	0.911971479316265
2008031	15	6.03058074312152	0.0801429601174532	0.104209811359086	0.181719886837383	0.292179255917852	0.237878550122991	2.23274727421123	0.891282062631621	3.86571302642148	5.87042696010527	1.06587164833596	0.430993500786402	5.93634021157217	2.81588977993807	0.154463797854501	0.434042769624415	0.885828278283974	5.02160990332799	0.932214603003242
2008031	16	5.72257909454906	0.0754157196496968	0.0956513721704831	0.126417929154931	0.264126845627823	0.203716357386121	2.3210322500702	0.888479530547281	4.20212078486149	4.62015586890614	1.09936270885823	0.715095426497914	4.17441027589378	2.54983655736059	0.140845356417845	0.41865140724823	0.746662115125953	5.39967683499246	0.564888209178117
2008031	17	5.15643622830152	0.076159179633781	0.102169206245217	0.114922289663418	0.259610490273545	0.174713715896637	2.69458376407354	0.988896851221429	4.17295750142506	2.7769640392843	1.25566525622452	0.842382194893706	2.62884533021367	2.30230259786198	0.151668474934377	0.396257750818848	0.600503376597577	5.54552075031633	0.24321535232391
2008031	18	4.98996065858243	0.118178468158608	0.0872815260113661	0.105167419133714	0.277337914521642	0.156335686811604	2.67781744485594	1.05687468226049	4.11986934224216	2.78833715795173	1.43616547796789	0.883438996800912	2.3293161158	2.33905533382143	0.181607110288087	0.334862297817442	0.538667792018562	5.19169772039876	1.0205904847295
2008031	19	6.9667888027783	0.215501769958581	0.0899243376489268	0.0893805947794447	0.315044404243789	0.136452937750722	2.81415320849448	1.17227588471587	4.02331822316682	2.78017296776426	1.47083233634116	0.866661829288724	3.60562484417309	2.51097274741259	0.20952427404013	0.23217949098321	0.428559134062239	4.93258851606584	3.24643517563981
2008031	20	7.98081920584884	0.218403334245746	0.128673438612799	0.0787353145381285	0.365556125642461	0.104370639759934	2.89589807342147	1.23894014453163	4.12994121588926	3.77547379168109	1.57157619591189	0.752257883359002	4.97236560366583	2.54944677453255	0.306864913311399	0.122780170785605	0.355146919978429	4.95160526174141	3.37823557448222
2008031	21	9.12855498440278	0.176464600842463	0.176029720166945	0.0864852626461473	0.474458566592826	0.152683314989992	2.81176719945882	1.28601413489698	4.75806909680286	7.33885832398454	1.66122762502832	0.615313799691914	4.81642280472176	2.57211165493067	0.355440397112453	0.0806360681211921	0.291902638887809	5.2734418276004	3.46610083949449
2008031	22	9.94668623245336	0.159521142034924	0.220494613980451	0.110214178837177	0.506473604426437	0.221247460728743	5.35785309075429	3.81903033768855	5.12576311610724	9.11777734533268	1.70908787026348	0.498896380570257	3.1259789657905	1.8896095751518	0.33745291619879	0.0726968675353482	0.218662962615486	4.83737253888621	3.33918371456492
2008031	23	11.1840492231821	0.192083260449342	0.264835009885203	0.117898457328777	0.496664409643162	0.128535750657914	6.69747439493252	5.54530980304443	5.2561597571268	9.60089764306969	1.85993715994407	0.450134415380123	2.83882497190827	1.17156191679839	0.3031497875151	0.0737709126613068	0.210081579602318	4.1792472485664	3.18578073529044
2008032	0	11.6787787730591	0.33585562874206	0.351861786056958	0.116415641156812	1.33905319466634	0.103957205456962	7.53105400005609	5.08488682762362	6.34874633669011	9.45745841797407	2.17274821712106	0.439299715140452	3.1099700387798	1.20206284903546	0.250466411185413	0.0691042628005208	0.190543547605918	6.54480521888263	2.93358747029557
2008032	1	12.0855761245242	0.395248716231833	0.382629341712994	0.126939175192785	2.28617669516331	0.112352262377559	7.42797381069373	4.00099890625982	7.66098513778298	9.21944095971884	2.44115417451787	0.440381281354392	3.66589174724928	1.98853113724981	0.252653892968504	0.0701393255329635	0.143967719400241	8.25419523842934	2.81839731641998
2008032	2	11.4859362626464	0.450368930530718	0.403466790507185	0.151056643004857	2.23694481313379	0.111427252419345	7.85586504903082	4.69113187577007	8.79749660052931	8.22443864406728	2.61600032743789	0.448668561289839	2.75150940292343	2.17058466063864	0.234862987362393	0.0889546713261228	0.132461765097973	8.77643210835288	2.82383291396394
2008032	3	10.9214378327356	0.633289995616671	0.384588943352923	0.125706922593904	2.15434109277575	0.0963961870222976	7.39687212017334	4.35309767828041	9.61644763392821	6.92324818042895	2.81812537657361	0.570971008243749	2.74931132033536	1.23429694319566	0.18296065518843	0.0847203965920783	0.154270001665763	8.86431882920911	3.03225465291535
2008032	4	10.4825116632703	0.856629181736271	0.303356451371099	0.121256290991672	1.91451382301828	0.0819825710850404	6.52922815723212	3.81248073757803	9.81672576338921	4.77656342990917	3.18867486009196	0.746272919189537	2.53825846849298	0.933807983501244	0.122510905302929	0.0741706306965934	0.173728317494343	9.61912884838849	3.32567048390563
2008032	5	11.2450505094837	0.940628954978258	0.217277691657781	0.214303094308947	1.62061745395486	0.0773066393624342	5.47731147217778	3.86916020818788	9.20311216776569	3.64849214902568	3.28838776493295	0.800361833649259	4.03461830270068	3.25802100599577	0.092352546562792	0.0728544554669378	0.240696096528593	8.10359324216774	3.33018528180547
2008032	6	7.21706585852655	1.10097018984816	0.190806739593063	0.454028963933621	1.51829293818872	0.0745172452139347	3.3810044277727	4.15078670296581	8.14160889965955	6.11997148003784	3.53795899095666	0.753330387607156	3.39840380340975	3.59798916111004	0.0828425057236772	0.0867005731063187	0.343877428053977	8.65767781980144	3.08005545921741
2008032	7	6.37058946636848	1.00839899019486	0.177116052318956	0.656058548253022	1.49526313891812	0.074138181485461	2.35264730508966	4.13010073354201	7.05551167110443	7.33981766093334	2.99955727567344	0.752930431339573	3.56841811487219	3.51453722150386	0.0715304762445185	0.101020012098102	0.231894944122244	7.99879834508623	2.88585175764692
2008032	8	6.86470953646165	0.947199583871229	0.150944726212933	0.86689661260103	1.5459680320521	0.121139322846873	2.08145395909747	4.46163450631173	6.92243252074458	5.6490026714689	1.52858066700948	0.69032313060191	3.14165230088427	3.14627279628905	0.0585568470268552	0.10242048789732	0.290752114933479	6.32761041221652	2.93434647751376
2008032	9	11.47731515243	1.07229312868462	0.128367266361749	0.894661005626017	1.5625524012279	0.186340956527773	1.89178250013014	6.20907155638935	6.09315664963023	2.33274942923808	2.15853770153356	0.59582885098601	3.30730732867979	2.16656761647142	0.048164741516488	0.0927179015275182	0.571109171335319	4.63957452686424	3.13151552615365
2008032	10	13.3387557154677	1.29245690935143	0.13937678348062	0.842283633191203	1.68304274232629	0.248629321689339	1.35178914178977	7.06403066672667	4.3692623719646	2.72175463059497	2.53449140696168	0.555493481011459	2.85856803172371	3.52657233646447	0.0413107173547413	0.0772771121390135	0.666920379887031	3.72820764793727	3.56866286270601
2008032	11	13.7529200941334	1.31603173190809	0.172686324999156	0.941457889547823	1.99828640530592	0.326733549905795	1.89806953016732	6.94322392674014	3.57215888159175	3.64448736030982	2.5393623321602	0.526166833081313	1.14162129453724	4.25440490985053	0.0358863645534727	0.061670343182712	0.766052557585324	3.67224452802346	3.76581169500369
2008032	12	13.8054191833372	1.28456767746511	0.136861800431029	1.02681613531407	2.35405683696176	0.450769182256664	2.52931435696889	7.78587742787947	2.57743957045117	6.04014188058652	2.56146199357876	0.457481402026218	0.47995185958055	5.19848169413869	0.0333752164751011	0.0474264519108518	0.91045512604304	2.75824293491914	3.77238088434281
2008032	13	13.4679290095448	1.2913292223385	0.155698275843448	0.867018494127812	2.75711710168355	0.475934548266418	2.45559470080782	8.44663521017909	4.66337807886514	5.72928507206365	2.3673122351786	0.413001364715435	0.389483425109619	4.57344961181846	0.0321345929746664	0.0382418139012157	0.850604380924933	2.61809241465571	3.72915423766127
2008032	14	13.7430139532858	1.34658014453842	0.401786359271201	0.773889564515274	3.19434800735951	0.521671224936859	3.72945825968844	8.8241127242815	6.54353129206293	3.72651647974742	2.25812954231022	0.401955174835991	0.434564416480476	3.86153494253687	0.030070219921241	0.0339258488427329	0.837192465870694	3.50435043016553	3.64900819672002
2008032	15	13.445537513896	1.20767051011032	0.529881784458634	0.81630538926695	3.26727628291673	0.591591436513716	4.06826135941482	8.78130873755273	7.74567448062661	2.06207951426642	2.05274861638666	0.401758597683522	0.533791871790988	3.02283015895945	0.0275605339003742	0.0305572015231331	0.887361276558655	4.46324193203845	3.6352863928706
2008032	16	10.7635458833741	0.988706629722618	0.584683021373939	0.763073872163014	2.86973143736426	0.579345603340465	2.69429777772668	7.83818671214462	8.92020066117751	3.09516562942053	1.93126344838839	0.384816173729634	0.639140011498875	2.15700189026007	0.0319268034934585	0.0216153794187052	0.83731837484311	4.63350177809107	3.41836227285188
2008032	17	7.70707887807861	0.788269294535158	0.804620231485449	0.650398202222836	2.50662909367654	0.51733181922098	2.76892149931292	6.83295223949656	8.49443717242172	3.47143502875738	2.01536123956545	0.359019297977176	0.783952517067626	1.59576687284757	0.0303426305868379	0.0190923559134777	0.832217299005303	3.59775042914971	4.68443866041646
2008032	18	8.21852706686947	0.834850996125364	0.543988538878983	0.603450401555796	2.10161536347421	0.473633012644461	3.13628954382586	6.23566626161561	6.94966516404506	3.55323388348218	2.12833601008242	0.334580920873351	0.729686882475185	1.19093282439212	0.028920922307899	0.0184572549772808	0.826566681965423	3.24378760743817	4.27731290488784
2008032	19	7.84350626132967	0.928015937716855	0.330785023606868	0.581884201131806	1.94611281216017	0.458063480539373	2.66699035004568	5.37428165480735	5.9515803578784	5.97897989817808	2.16271776394628	0.310562333161176	0.63856420341352	0.840247810229726	0.0255229533398531	0.0191144310197402	0.756289904919258	4.63633326534283	9.27447750390569
2008032	20	3.77069646193041	0.991959959348741	0.150790863564938	0.561853856167271	2.05887942178349	0.400725160862473	2.94178609733664	4.96055648304378	5.37158144297918	8.35184748879061	2.67402834014469	0.288353978699348	0.654618563790469	0.643028795499067	0.0250634514181255	0.018134249109567	0.736295631897184	4.53025548017717	8.8373073533409
2008032	21	9.79507703141965	1.04543317304722	0.0399491392075292	0.617625271248465	2.09249124253841	0.358768456699309	5.84047811478061	4.64834936752097	4.77867894546058	7.40350828132712	1.93696792701713	0.275100347005978	0.686456238402478	0.440433064196361	0.0257382232289038	0.0227233234876017	0.711917165915701	4.49203456010249	9.24700773364757
2008032	22	4.96814256686541	1.40937715989307	0.0519785092638761	0.6704080439923	1.97181054087432	0.338150935691011	5.51781071795394	4.72136965046829	4.79940574122475	9.28880862658379	2.70737411849172	0.279280546756508	1.07872410398095	0.310913614646922	0.029159160909755	0.0516986341735073	0.660730307599032	4.70198668494336	10.0387094911002
2008032	23	10.3331296794119	1.73642516380116	0.186578074404475	0.666240527557428	2.12032470032257	0.35781113096784	6.75720719820762	3.49917316771872	5.42326573597303	12.6604127318837	3.82582428889222	0.288550554996273	1.45495894144232	0.290585499995987	0.0335280952798285	0.0571188135746057	0.628877273658917	4.22704699898515	10.7354208211503
2008033	0	16.4658437421923	1.69228170917408	0.259531141432802	0.759108786374039	2.22141372531536	0.379692964707048	9.08730295186637	3.7003600229708	5.29413930081718	15.0208108983496	3.36430722762312	0.323086078266041	1.66785594555094	0.304548841550547	0.0357150043272602	0.0278302818324294	0.58944312077379	4.45250019667105	9.44681996363608
2008033	1	15.1171573690721	1.42814405901087	0.334476599250876	0.953437749504318	2.17688737373922	0.433429977596762	12.1124564769815	3.62558701286749	7.11014097766147	14.5602807016711	3.88108516532563	0.369160564007654	2.1221118476678	0.367463777385794	0.0331866516216611	0.0211552704758607	0.563358432597904	4.74365998137912	9.07841360182035
2008033	2	13.8091032957831	4.56691797977584	0.351314439693115	1.02452970886198	1.92471331359536	0.770585285772753	12.1875105710578	10.5863469378421	8.21738459766891	11.4926955162658	3.82576131887271	0.42125538126854	2.89051769118575	0.526717019461455	0.0289207088707824	0.212546661510639	0.676016222446854	4.98509157342972	7.26274334143709
2008033	3	12.8284596208592	3.58581110709044	0.280451164690835	0.889646943758543	2.4526401392837	0.987927837461893	10.3649094554873	11.046903190114	8.98204657737045	8.38812587890081	3.85215023540618	0.463114110644454	3.15516137608615	1.26027144855116	0.028865207461979	0.281184827487645	0.808293497310981	4.98415897408403	6.50697493952121
2008033	4	7.89347351892631	2.24485635182285	0.356165644265042	1.25771759985926	7.97881209853206	1.57239668535389	8.41765648982137	10.1996276552048	9.42031203369541	6.60237051712945	3.52082783283055	0.517990532043212	2.63342400781856	2.27311001706643	0.031024645874556	0.391440653028905	0.839550479522981	5.17921173547081	5.70241332051738
2008033	5	3.88334730726728	2.17575150941556	0.522285493343031	1.90750506488361	8.87235895972487	2.29646175451997	6.45537168847153	8.52256229493869	8.96645407812194	7.08906474001078	3.21087377943891	0.57923203304255	2.29932627929901	1.95341067938795	0.0280600970427486	0.450647727753892	0.89515408529785	5.90834748783876	4.68464885640693
2008033	6	7.70006636023993	2.5668604961133	0.676585906503772	3.40546709892703	8.18578991098946	2.23188615539279	7.36038323844534	6.26217306944349	7.75969435729935	6.45412824489668	3.11321678480403	0.575704758618333	2.46209593096252	1.55834731708242	0.0255683160461236	0.772487461386039	1.05907558771218	6.46591502257868	4.20829771869879
2008033	7	13.2087051259962	5.09977018180226	0.668342542216793	4.39344688203391	6.57123525525795	2.33402254424443	5.63417089181228	4.92163208075309	7.15753294726235	7.33973981737663	3.13151735990404	0.598068882014855	3.30766640946455	1.26995296914984	0.0232702710081242	0.674733396627804	1.2506748120172	6.44536686746076	3.96018997412301
2008033	8	10.5795932066784	6.98248173543313	0.614856653325525	4.40491040193992	5.27716404689565	3.86480159246929	6.18555228216228	2.74907718752096	6.6090613006179	11.8435771181795	3.01433892330323	0.669275253010824	3.3755680133072	0.861241530110485	0.025824521927774	0.902712086959626	3.87306587313178	6.21473116160686	3.71499793575581
2008033	9	9.90392628957051	6.46506376952038	0.654945818948714	3.50359053278567	3.60410541989523	4.18047930242314	10.0685042380755	3.62238334103856	8.1385632389875	9.8052359826598	2.6598351119582	0.750319392769988	2.98406907442663	0.543681778939865	0.0633204335444257	1.58792331255543	7.25113721392748	6.06384791317014	3.84621353635321
2008033	10	9.25241594783475	5.34746245257986	0.749239002969988	1.92870938510499	1.53311435547298	3.88121931470694	8.85577795429727	4.73025206268223	10.1173308993678	8.46682943154983	2.35875125083025	0.842598506340629	3.14374076557658	0.649525102272408	0.1136494054976	1.39606584938746	6.15485121805839	7.25011587929437	3.81252335271952
2008033	11	10.4821986851577	4.05966543319868	0.780725960873503	2.79977471782583	3.66477385593557	3.70942916320884	7.15024779792225	8.02049432082524	10.3340648402121	6.44417768725385	1.92651363796663	0.875794664520749	3.40194154213361	0.843604226109145	0.13470341557139	1.38103939752521	4.61081748562964	8.63216287429749	3.57975034404868
2008033	12	9.38672447321618	3.67616405514766	0.95469609322077	4.68605398669028	3.96480910803825	3.27813171778006	5.8983413030167	7.20434519805819	9.60520852743976	5.09720016311472	1.55392729693557	0.842537434460126	3.85533654746233	0.785893032949695	0.178735259899352	2.08485079872795	4.16184256964126	8.3556398832012	3.21170864020352
2008033	13	7.75194616387874	3.71193554889846	1.25383443322576	3.38613670854907	6.77391504521645	1.93204985599268	4.95172376585459	7.0269834837838	8.85354786971035	5.8833306412255	1.15875035529713	0.859742764803129	2.84122649204398	1.01263293069337	0.426357976174559	1.91779960118145	3.68931793803914	7.53708451073883	3.0965696590936
2008033	14	5.98576072221522	3.44939409495524	1.19589761148187	1.88356321491063	6.30999428414405	2.08873752987583	4.57183198752533	6.25595702819665	5.92653981665627	6.5727429205537	0.783889626315544	0.889493084978758	2.28828071940351	1.1292853641623	0.719882120188164	1.77300388338834	2.23163389428086	5.98045737847792	3.1863501714676
2008033	15	5.9359976974504	3.10940869652774	0.973610662527322	1.76560876427222	6.13924094343597	2.09567735424406	5.17104466473473	4.75778672657559	5.35154089995766	6.47607873783977	0.752357046551514	0.946408192311892	2.04916472303657	1.23209419392486	0.698206940913074	1.45989855176696	1.72730063030738	5.45379452980745	2.86824269988111
2008033	16	6.78662245917266	2.14528242152234	0.8070943470472	3.55246156674367	5.20806455702984	1.27354672397805	5.23165344844643	4.77400724571188	6.20546503594673	6.12973376652896	0.655146771236999	1.01180990183214	1.63337268515045	1.03076396339557	0.569060639226683	1.14538191554259	4.80988039106933	5.89971789171835	1.99308549549049
2008033	17	5.58904249310645	1.57054667048479	0.626932027507331	3.24175079271023	3.87494716439795	0.805335605396906	4.71004351651516	4.81493300197734	7.24567711200556	4.85660323131927	0.613355649692194	1.19858015830598	1.36628869126045	0.877741845590973	0.498821774566671	0.794322078176581	5.68627936330745	5.51594276087764	1.42840653761591
2008033	18	3.97963559971347	1.30420587554095	0.510738521695821	2.31084366570609	4.0586125356286	0.911541471149691	3.77758839944551	4.55163167468663	6.52462737758896	4.83535015601876	0.764698221138628	1.3823493604878	1.43200093163677	0.985327008225607	0.453359091864066	0.787416750613849	5.4260065182344	4.84942762090276	1.15187648356128
2008033	19	3.92019648859616	1.43366818079499	0.410371789691607	1.41713558050671	4.35424513137653	1.09888510994661	3.79686812239502	5.26179179824497	5.32787574344615	4.42974108197667	1.04175993221188	1.23306420525416	1.44350839175526	0.943673759311351	0.481196848444064	0.712623313488231	4.82801050783375	4.41865853197178	1.08419313752699
2008033	20	5.11521089038915	1.24685466867606	0.34950885051081	1.0482033927494	3.96530032616314	1.00142626153859	3.70446734791306	5.10231788647699	4.96586789081894	4.15585597871856	1.32907099197213	1.20981229830629	1.22723336814017	0.856113284014718	0.701699841209852	0.534438882104001	4.173322934893	4.33868818772325	0.921179518067573
2008033	21	4.70731892864027	0.693480357310309	0.340480965706989	1.00305120503835	3.87666186480101	0.845259919808791	3.37057129871102	4.39442878393619	4.59091488948231	3.7254526088625	1.00250586574452	1.34673471205919	0.932697698710607	1.28594702664812	0.746871027566944	0.37116612522462	3.8756854457646	4.37315709948983	0.766824764956637
2008033	22	3.76739802642931	0.503965144448142	0.344497746039105	0.735678693059651	3.99296298818757	0.605932820020801	3.12407077584811	2.66396432976585	4.47463290112267	3.11807551629195	0.658901557789801	1.13774135083464	0.872279449738601	1.24098945788116	0.957536659309312	0.290813619373724	3.87299220172353	4.50649874013613	0.809743642582492
2008033	23	3.51349239143241	0.503874020990374	0.343585607475968	0.575967567765652	3.08361975725189	0.443811126358852	2.53416614380873	2.05833466222586	4.85992039739868	2.80653904229822	0.662162889609009	1.01053310663273	1.11925314766207	0.966091920325441	0.746396236419909	0.25200588199357	3.9578612815225	3.91268277893676	0.866820396314795
2008034	0	3.52456002625316	0.531472117664473	0.326581696212274	0.553727649333981	2.08939847865267	0.383864832053271	1.89159672304682	2.94524593837275	4.41207389825554	2.77351703702569	0.812596949284913	1.13509597495122	1.11939847445156	0.865177750179326	0.833422162681231	0.240843164790568	3.85141911986622	1.90407234222787	0.807796560318611
2008034	1	3.60370516820146	0.507788274274755	0.305107046513402	0.466812372132097	1.77394968263046	0.362797473960853	1.52286356960776	2.55858302350595	4.11242827957965	3.04811017387164	0.92646159911254	1.20615452932705	1.20545406678554	0.966922732490751	1.06468752467491	0.234513533327729	3.20586353401592	3.72036793711496	0.724172080205733
2008034	2	3.63174582602312	0.504568824985344	0.295119408096705	0.398539020370804	1.52159665856439	0.329763310547437	1.6435824661684	1.95505871085147	3.24407378551599	3.07534898343027	0.785792108980664	1.02724646694823	1.09723610118394	1.02021862882785	0.981012862846101	0.241244909675735	2.64816307535409	4.27931957711388	0.713628628816774
2008034	3	3.26779759691449	0.513654831538087	0.278246549922635	0.374888500672631	1.32835613429872	0.285737832299717	1.72628587873868	1.76695453936885	2.77283000124569	3.19319428382958	1.3432764041696	0.77173383773545	0.650051192211853	0.624836126674578	0.939782195417619	0.286162352332239	2.88361579437787	3.28968919373204	0.722730142008503
2008034	4	3.33980742622992	0.486577655393295	0.256916023734121	0.354004194020187	1.12651836514626	0.278727518486073	1.53681870803571	1.61628529642367	2.79392608372031	4.01441320649109	2.18850559866243	0.481020052046887	0.516047308702605	0.412432975984759	1.02854848582893	0.300231578308021	2.12300032453601	3.58185598199416	0.674124421130737
2008034	5	3.88532398417469	0.468072758274479	0.232552159842863	0.344046390423849	1.02391861464663	0.284452509398174	1.53043097947616	1.26199701621344	2.98540611759043	4.35805859835966	2.46787138701465	0.384360238993409	0.449027584731019	0.359085996628115	1.01755461084531	0.217450060463557	1.70873248609642	3.70206282594596	0.609643046470685
2008034	6	4.17066903029821	0.523090995341655	0.212599929867272	0.352431404372399	1.033736278234	0.296425094507105	1.88144767271406	1.19869399693257	3.31198748006221	4.5730122951818	2.30346452429573	0.467300315404749	0.541576066625156	0.309348994577086	0.476593388553625	0.200219717805743	1.55495941442468	3.84993184490154	0.542141840892823
2008034	7	3.93512366714925	0.579575187460498	0.201292579647009	0.36184317885545	0.978017881688772	0.311380240158397	2.20271629413344	1.0805211655204	3.33806594231159	4.49400070482979	2.17720654814874	0.807430312217929	0.530544253697387	0.281637557009985	0.238378011798153	0.190404886549961	1.36930468568393	4.26663206808301	0.491532055611783
2008034	8	3.71398284015851	0.597075702376556	0.211496667779285	0.381216996156536	0.811833132270959	0.320690258653335	2.28427719808339	1.09198933319231	3.22040703343623	3.9864215987209	2.39901732985538	1.23739603124566	0.500928881497473	0.282132713173109	0.213090720961918	0.222828619315117	1.03270417893823	4.28090612255586	0.469656016366024
2008034	9	3.78667803580843	0.726105750578666	0.210286733431734	0.412483787421667	0.929578022703883	0.373155360247517	2.26404652858524	1.28844367458002	3.37933314716465	3.74615043688025	2.43221196759065	1.10280765325278	0.508321588044398	0.284566728505342	0.282312922786308	0.29928997618056	0.689008550529777	4.43455771997891	0.411497019765157
2008034	10	3.87441904885144	0.877852812398386	0.202211000865694	0.549291504251965	1.10273995641925	0.370423087168791	2.31264375353254	1.53021052723579	3.62799572052334	3.82983536965918	2.50467998950718	0.892140788657372	0.745645371837301	0.301216165877727	0.323195946566677	0.381670092174392	0.601084805788061	4.4602015211396	0.378932648683994
2008034	11	3.45325263720528	0.654936361156681	0.198951916742739	0.536603881440577	1.2379764074517	0.263243175619131	2.17639029037541	1.71249871417647	3.49049116179092	4.17513758397182	2.70490931431734	1.15265286425218	1.51049010851446	0.319214956580692	0.411340179061869	0.364655869903515	0.578332811205307	4.21252692826041	0.377328316786437
2008034	12	2.90216755774662	0.530408093334692	0.227237756583921	0.543648778290963	1.45851974594612	0.216074810647562	1.91787200120788	1.55758149804235	3.28706822475685	3.83776151932265	2.68159952383991	1.0194791818094	2.99999713749131	0.331156955407505	0.467227093335942	0.388072752410996	0.882243094451301	3.82949210626145	0.357507221154099
2008034	13	2.62701360216903	0.325573108826597	0.209885505972285	0.437867834353997	1.28919222205749	0.256538780132114	1.52797106408072	1.72454564675696	2.90844421818937	3.09395727264838	2.4293703500288	0.627587848715819	3.96357389599872	0.317232792794485	0.507297641841865	0.405310901707406	1.20956682245275	3.6048779952577	0.306066914215825
2008034	14	2.81932101042933	0.28793168745404	0.202853581232396	0.301723721556704	1.05798833954823	0.320441288340333	1.18364717614833	2.00110674489646	2.61269087615572	2.44008039485167	2.517347897254	0.491825575505753	3.07320290847325	0.765515602416847	0.56059529514072	0.44560578130209	1.14393177151296	3.36785743298981	0.261102012959419
2008034	15	2.82309765252083	0.340527417737169	0.187571916288215	0.270676277205009	0.819844227728011	0.308221151630246	0.972726837092132	2.03401951107116	2.47372536095591	1.83988657592638	2.53371289109153	0.475256707136868	3.08469568499215	0.633609505335215	0.506988413770515	0.544674912894608	0.89151859135577	2.75916891405237	0.196571044630173
2008034	16	2.49134431449707	0.27333321367063	0.173503154961842	0.255659750261308	0.499484380695683	0.255497077565986	0.934961825127381	1.37587877663579	2.59011427028231	1.51039645096148	2.54975020908463	0.553252045372236	3.62461841714058	0.534521181781893	0.396331051976527	0.547329872384928	0.661991247491319	2.49367755749838	0.16885229777469
2008034	17	1.71655760315051	0.176643727749547	0.159994088766344	0.21240332089975	0.340903220421793	0.24354256355614	1.19017447075677	0.754451656103947	2.71743583345071	1.17998375349302	2.27509653699125	0.487548706839926	3.29319363849042	0.483404888259744	0.38316389710128	0.525836553081479	0.520952687042704	2.5044250682843	0.155907566442841
2008034	18	1.46905965235064	0.19279341721617	0.149566956244462	0.178529385739097	0.312883092032564	0.252188411772064	1.29334090573065	0.633261276142844	2.59672460114026	0.978398746787574	2.00994491507322	0.459552871691923	2.8649825423447	0.455695826800273	0.427472191793182	0.455982509793602	0.370568669418493	2.8257105505968	0.133477305582915
2008034	19	1.67507108147408	0.180636226865181	0.141347892931477	0.162085950488579	0.313646681981214	0.218316669254451	1.15408976743205	0.761036264154209	2.49884569540679	0.704195247406847	1.43680708261895	0.48149212834353	2.62250612584703	0.448999933826624	0.534639762287628	0.310576688523371	0.279947966718678	3.02883444549465	0.112981484775806
2008034	20	1.7602148050011	0.169678248523499	0.137683014670978	0.159945504270932	0.291994370548618	0.218273966614118	0.731797195296962	0.850462309853959	2.62173205779908	0.389280970134496	0.946005759126323	0.506005776107195	2.28061235763751	0.457776298450115	0.444333703637953	0.268378831816894	0.316303143556437	3.0359998398476	0.0989273567632602
2008034	21	1.71411135415126	0.15881605962762	0.13870064790046	0.166303301339247	0.272993663401441	0.217883343282758	0.590323891810006	0.769581858310983	1.82794248707972	0.39060163465252	0.961587083473782	0.546747977156223	1.67603532212358	0.469251616098336	0.251096190396361	0.251317537012209	0.573907847755902	3.10675279691425	0.0647416794253893
2008034	22	2.0708921881638	0.150898810868191	0.145271626733658	0.184553220160992	0.300697249702651	0.212203252237464	0.666541615954311	0.718954370186492	1.5365923680375	0.613266580707444	1.24129879520097	0.811778337773573	1.60716345471588	0.491849795370323	0.260432398983889	0.226271382430061	0.608841110171952	2.6469226880087	0.0475898553077548
2008034	23	2.2906424172219	0.146893209273703	0.141945012650958	0.199067053019685	0.369288392596917	0.21168004978768	0.771378244526001	0.677444000778546	1.66175487089524	0.630400509790544	1.88584055002375	1.20331142965684	1.69851060716145	0.549648272580465	0.241323351366149	0.204985692968446	0.387572838770855	1.62443410989563	0.0504965051077483
2008035	0	2.46189255543916	0.146838327164502	0.133876612807283	0.216441774759369	0.408112333546405	0.210711201655048	0.756693353821153	0.661360200125796	1.85708083670954	0.392975147453883	2.2978358827297	1.33530212669865	1.54955105588578	0.681946964020037	0.220986333998417	0.189056041911032	0.416838166616966	1.61368646631877	0.0480020251825147
2008035	1	2.49701104703435	0.147113723949923	0.124576046329683	0.232005463752986	0.408601372237042	0.205458626270855	0.633075681047471	0.67878750518772	1.92239137648298	0.300572562416828	2.14919023547607	1.38924299973275	1.41214523051617	0.812415573987534	0.230142882290943	0.168731432290338	0.443099991348073	1.66628099591281	0.0411405690270647
2008035	2	2.4674088197402	0.149185358474385	0.114501327910537	0.239524161506778	0.405910618800201	0.196342287985799	0.544204273776884	0.701493956898043	2.02796393545323	0.283999166104699	1.42630444982924	1.37227839745241	1.52679554720914	0.750354204444536	0.253863509867992	0.158741063200788	0.542470587676869	1.70391997999479	0.036282115098175
2008035	3	2.51112791253833	0.151922643095667	0.105200720816759	0.235529690991687	0.400082373547246	0.18863910868226	0.498089870691081	0.668916241242066	2.11134330484273	0.289717634605374	1.22846885191948	1.10980680838003	1.65054752736087	0.541163842984931	0.255564910976865	0.154948135305717	0.556702303524744	2.05680911165824	0.0354098773084013
2008035	4	2.44433446225342	0.156610767099105	0.10092536045436	0.224331257067027	0.392843606066425	0.18311796169658	0.49166969864652	0.693264331242289	2.18577341808494	0.294323709360916	1.60266160352493	0.728658689991547	1.74095500555603	0.405929922949205	0.246213604052714	0.147629820056196	0.473490812420204	2.2989899626926	0.0317758109709081
2008035	5	2.35162948143414	0.166714719461548	0.0983477143448667	0.210513944031956	0.386466021376148	0.178335561446479	0.460240174609197	0.67809888777631	2.19737610888551	0.316752670522998	1.57415648455971	0.663994648841041	1.71231252232733	0.305927084841472	0.185253527361122	0.128384734511459	0.397020666275115	2.35399548940205	0.028728505262197
2008035	6	2.35828368808078	0.186435980900738	0.0874631781947281	0.196074526138886	0.383577202167703	0.17621652772215	0.420214542015254	0.705844089726828	1.99309121858662	0.371288641820506	1.62538591831906	0.97129468377176	1.57137084655183	0.267953159904051	0.174461004307263	0.107397918341816	0.341858337118221	2.29362044104631	0.0218271167583143
2008035	7	2.32665653701814	0.196159122687786	0.0757115355287376	0.181179107573454	0.368446659334282	0.176223571880842	0.418154859101398	0.697597008839241	2.03025671151097	0.390035722554939	1.65171908731992	1.07028646560022	1.3739779487326	0.220005961084124	0.180527447974141	0.0877899819297713	0.307679570245382	1.89474861082922	0.0144798667972114
2008035	8	2.27747272696932	0.214563827585498	0.0652822047508767	0.16776237714556	0.349414964513399	0.176611299091812	0.461713351720107	0.720714821925109	2.33221403860816	0.35559736970334	1.39360443794551	1.0886599347778	1.27759230080831	0.215616161464373	0.164086809446532	0.076140029344615	0.268102233476246	1.70000799844474	0.014033660536059
2008035	9	2.19329629168366	0.212830365303381	0.0571290332150599	0.167731578545836	0.309013165720959	0.198390003116929	0.497003929012461	0.745161436377359	2.20826886031515	0.367982444283689	1.18489851926651	0.928961482024511	1.24877482314906	0.218816588284583	0.143833324929656	0.0702363003623786	0.226047794241207	1.6658244319817	0.0161555395750054
2008035	10	2.02573208148443	0.202223379068377	0.0732433067998933	0.175285786780488	0.31056352775854	0.205140230214263	0.514358317915094	0.75692064241879	2.01213926970783	0.380934943478148	1.29508059285824	0.801076613645746	1.28466050713011	0.217226044253913	0.127467046154995	0.0662970230442505	0.183894437601233	1.49217108308731	0.0193213169348952
2008035	11	1.74752790106399	0.18590051581019	0.18325558889064	0.171434305562052	0.29663473545812	0.196996725959533	0.52333608146932	0.723697237088971	1.91844019643254	0.349283769534517	1.62615241202485	0.749505396682407	1.37921912626242	0.204148538213617	0.112744282235851	0.0638689736780419	0.151729191538381	1.24748999135976	0.0296899313069701
2008035	12	1.46799430097303	0.17497457228627	0.246616555990672	0.168163837850616	0.269855252607481	0.174050197090929	0.52223479982834	0.684041491705917	1.86222967237306	0.357134281511045	1.7238861992761	0.669062230789615	1.42748000248515	0.185698610940157	0.106307994922214	0.0579393877526282	0.136936129503278	1.03272859642784	0.171067332038417
2008035	13	1.45041843946819	0.166588394901991	0.219951699854366	0.159571356709817	0.245508657862991	0.147587662402553	0.505826835526308	0.641463363594922	1.82606220130983	0.379283550446144	1.54860600238197	0.623688944250799	1.43138282046437	0.18067625322957	0.0994822263107997	0.049492936004679	0.129761505910178	0.862170830048988	0.524499099600912
2008035	14	1.54068203544183	0.157611335191214	0.169482784868086	0.147110939237353	0.235995331026328	0.137141298328124	0.47001137758633	0.622372308821211	1.7293466726712	0.353788582536037	1.3815892404451	0.662025237647571	1.54208455254155	0.167255111025378	0.0942937920373496	0.0420354709891702	0.116612941230427	0.710157790587162	0.501301732843729
2008035	15	1.56289937406699	0.139884150902003	0.145648612162334	0.137122224228726	0.239492408549915	0.143834456009075	0.466217352002689	0.611965722939285	1.64718261777264	0.354271954209906	1.17335499666805	0.681495200366364	1.66339424657101	0.160245584791819	0.0923083933577409	0.0367269854416774	0.10518503840581	0.642158039940807	0.743998019391065
2008035	16	1.69202017547226	0.106662846030045	0.132789462560035	0.127967178052322	0.240072077693135	0.151214090160663	0.495770879911273	0.615299483720738	1.52809576129933	0.351365531820739	0.89921549950806	0.653409082392424	1.82168371898753	0.156660056821294	0.0821803193889755	0.0321452897801566	0.105504294009885	0.634278518697876	0.798243321996118
2008035	17	1.90196365319908	0.0518158755586418	0.0934334300169002	0.120288238539426	0.241207477182346	0.141576894670625	0.522941333051291	0.576293787662465	1.43304390854416	0.372896672149704	0.83401389248039	0.563682952238273	1.99101323963353	0.155409903654289	0.0810267677499183	0.0227591364457734	0.111859561028873	0.635520309665703	0.609054287140071
2008035	18	1.72657763273688	0.0538803517473119	0.120712213718035	0.115171653543234	0.259043822061443	0.105639179849639	0.506530407973587	0.408247549520333	1.42185007255193	0.521274694723336	0.861414715404061	0.499720762828082	1.99869300422092	0.157966018418415	0.0771133015921095	0.0154489521043979	0.114727677300315	0.686288282764354	0.503498659712504
2008035	19	2.13494496233533	0.0647358384506726	0.131932284337693	0.1133855757291	0.280016024637703	0.156686958565956	0.380357468594589	0.330883707147767	1.38902016795501	0.892802328138426	0.847628893467842	0.559202219273889	1.83796877730344	0.160350619261708	0.0812693550244855	0.0191986929225937	0.108804408743765	0.793567612438161	0.466938896427793
2008035	20	2.74988134683164	0.087470730355801	0.131985692527228	0.141734847036123	0.327760438092001	0.117060773709169	0.260804377551779	0.413968731210444	1.35362504586686	0.979170182816363	0.777266378720122	0.582403583716496	1.53606829890413	0.161344013399372	0.0882338761706791	0.0272482102634023	0.101300052652355	0.894579687230954	0.431280552374673
2008035	21	2.91027214579427	0.075362356078181	0.129341207809475	0.0952724667976005	0.381665659819968	0.0877923873865144	0.298754020254372	0.636595713381173	1.35555108485014	0.84973525719865	0.713815873188242	0.541521767394817	1.25086301983561	0.160881978703893	0.0838748164637071	0.0356254160532772	0.0983269724945766	1.0904000168478	0.323124205308249
2008035	22	2.85177547493671	0.0721635656634635	0.127385107979741	0.0515073871227966	0.333381188128242	0.0716375327066578	0.492680106657132	1.22240355797275	1.37904948156616	1.37105841799011	0.69475201252445	0.514169957293917	1.06759218804351	0.157750372416434	0.0748405837780764	0.0442269265640625	0.0982144914378645	1.49719792831392	0.485148810915293
2008035	23	2.80541143568977	0.074003023262557	0.130153077913646	0.0622101629826501	0.389031829111505	0.0579507965265975	0.361870103597544	1.87523520008555	1.35183542092811	1.60279743774287	0.705643392391297	0.489692860059236	0.911365687135232	0.153316460881935	0.0472774146002524	0.0687261070897157	0.10156038112235	1.73938579621585	0.515522667191771
2008036	0	2.77466405262175	0.0851282481670498	0.116113317351323	0.0607046475567569	0.559420555411293	0.0559455207121186	0.48532231855582	1.61511534759358	1.38514994349724	1.95036377357411	0.707980906874012	0.439349252906587	0.76017689998021	0.148973545705428	0.0269515716563042	0.135263813177748	0.106713578596428	1.66166136740236	0.330543384469582
2008036	1	2.56437556124148	0.11531791066635	0.27668468910991	0.0700707897091494	0.734453651613333	0.062293946225641	0.631888565815494	1.21633905237159	1.57162003786486	2.11192985027961	0.740003582421568	0.393213234998655	0.388902332403359	0.144889040985719	0.0203688534172466	0.187430959913631	0.113775588920009	1.36653073287074	0.1844472254323
2008036	2	2.31212297292158	0.111712970799529	0.38587230397606	0.0849518612584594	0.634440592159573	0.0702324983092325	0.638270727319803	0.933671950619789	2.08913850558055	2.09965347548578	0.816118839172286	0.377216932693106	0.482457533976094	0.141168388882029	0.018062739174377	0.179829566231445	0.135080272843564	1.50617294280565	0.133422671075617
2008036	3	2.74498774791239	0.144381799137413	0.238905398662676	0.095486849849863	0.65544642699115	0.115965741379098	0.570899175942889	0.793052865786783	2.35695354694283	1.89641817541573	0.902834883905152	0.369221185532359	0.662368033116778	0.137572329497485	0.0175185217547962	0.152810256904995	0.176395310238892	2.15786864272503	0.146315138657306
2008036	4	3.31761728992582	0.203265311406271	0.25615916569536	0.101613080575605	0.693594141215362	0.166276529864104	0.482569384958373	0.868784806398799	2.33059814865946	1.73080433269154	0.907973923616375	0.362375626262573	0.831257542322796	0.13402313249729	0.0177038477104297	0.135816174806168	0.218705901074215	2.44911895430454	0.161135642895594
2008036	5	3.28560869098596	0.188755249586225	0.222689363488817	0.125087604563583	0.61952502233986	0.151580109765168	0.460863854589152	0.895305370228713	2.36840505072769	1.4398919210356	0.852676248535638	0.33623903143862	0.795905321465625	0.129647656595836	0.0179837417824075	0.170320905511603	0.271825001141933	2.38228102117486	0.265705335241513
2008036	6	3.02408053674708	0.135290523188319	0.202805166336727	0.215809072101662	0.515558359630938	0.164021352268554	0.438785902270694	0.766814450554512	2.45218809070742	0.982300720062642	0.808318006284525	0.319067907812773	0.921224131174092	0.124101296030727	0.0177130937538837	0.177734007977715	0.321323653807582	2.11733898960808	0.447581131933779
2008036	7	2.74441812512703	0.122388741820595	0.226715996532644	0.158513154384819	0.405330089778357	0.151924754549336	0.495737868721154	0.768931780261936	2.16111402524075	1.07622761432188	0.648710186168272	0.307661695748234	1.65397170718224	0.118373116654433	0.0179532688097699	0.169575660434135	0.489302421650972	2.1395605275477	0.445100265768003
2008036	8	2.68357888183502	0.151972554546543	0.274297891976377	0.129778458990771	0.309579468059387	0.149581007308779	0.637108676288441	0.637324725587273	1.92621958798633	0.932213522195534	0.625553535169546	0.298347959122826	1.57075683546559	0.113498440777019	0.0211334558743265	0.217303395301115	0.744535639504831	2.25919352864368	0.356283920731077
2008036	9	2.82708102760134	0.181941770827347	0.328520049239225	0.105117116858752	0.241057551481152	0.131720050366903	0.870181457987555	0.456642936093461	2.12393288303651	1.06692398965073	0.606689113025682	0.292568349928102	1.20460883989803	0.109992497298384	0.0595754881884029	0.186443721489113	0.799846703903896	2.05100990421233	0.0910201607848474
2008036	10	3.65533668489092	0.17641147878537	0.378268482368551	0.0915280258895723	0.188037303876188	0.152937779063938	0.451220898404628	0.450482543235802	2.35281783638114	1.16788560770162	0.537755338723686	0.27833962541532	1.8302885190307	0.113086230275566	0.0758286304315921	0.174736961912582	0.895624974486812	2.31968212472046	0.0744494414633132
2008036	11	3.28627499353972	0.170811449136854	0.490663843044994	0.0973312250513381	0.177894123965386	0.205834489761861	0.334581941273967	0.479712145159808	2.17231916559369	1.20544720981883	0.550003079733382	0.258589530789377	1.91418621365736	0.419619517466816	0.0776977500181933	0.166442780885569	0.877048081128373	2.75054746181764	0.145363743017534
2008036	12	1.99634988966068	0.263952620323306	0.365142664091284	0.135456428032347	0.167576627746373	0.164543066630928	0.281850781342589	0.605253061682644	2.01343637045264	1.05970672617277	0.651006835776784	0.241370314216666	2.11036033491406	0.776250436473332	0.0700293425996617	0.161340928943716	0.626429505683214	2.95270379664541	0.379531644541846
2008036	13	1.97792503166781	0.395143839123014	0.267295356491822	0.122581757301038	0.19162510994786	0.136940585960065	0.452443951436362	0.772266339784573	1.86527070198526	0.997269985017004	0.631813907106439	0.234989157426054	2.02906616753761	0.875487977854105	0.0723294886433037	0.145363815668896	0.427804698932962	2.69388373530909	1.56614503505674
2008036	14	3.77221608379541	0.463912507556708	0.188556915311381	0.105367844793602	0.204635994882319	0.1262340084192	0.551480416130955	0.854182425240898	2.02503044831637	0.659725607177421	0.492226425825919	0.232988374232419	1.78706066130412	0.657987415994805	0.137208156162303	0.107079383803633	0.298190668707477	2.42210620942236	1.61911866223696
2008036	15	4.88264575801206	0.276747505325709	0.211344112175141	0.103671758993418	0.209973607216817	0.123611414125067	0.270704014759617	0.863851872807497	2.17219480999038	0.495642198339067	0.373959248885903	0.23206125823042	1.60005004914653	0.518485722205987	0.188021519818547	0.0860403762268972	0.242098938410308	2.09108593090283	1.34974447537812
2008036	16	4.38719896404639	0.176293804617281	0.245394412856776	0.130046345219172	0.283665621678513	0.135526213119879	0.160272126521059	0.540947518088289	2.09476679317048	0.68130979772625	0.358316698071429	0.226619863363764	1.33453525431227	0.55225399802925	0.192141536730647	0.0728976554451055	0.186456118319757	2.13024892854845	1.97053426667245
2008036	17	5.08619463208348	0.0998237328027252	0.217209240443064	0.133160503970796	0.355141515359645	0.161391697398944	0.151113401521164	0.511048210931318	2.35653064508801	0.662183076931322	0.336514436564497	0.224401393052807	1.44243425747935	0.429077574181395	0.174327353956558	0.0602207728529707	0.134320210175673	1.97349831478844	1.75331822174284
2008036	18	5.1310323720913	0.0504631003647762	0.187562705805756	0.143386786924099	0.254299718018605	0.120116358012987	0.332469507968218	0.655144008414608	2.33550378475016	0.740112069881844	0.303016220505086	0.230138680298393	1.30139252858465	0.296416612552677	0.180471405900127	0.0575658251846302	0.1207711492049	2.23156474795343	1.16764512550295
2008036	19	5.01303489583836	0.0268083045430702	0.175805234900602	0.115966210463521	0.214282066554463	0.0667976223304347	0.128474224483408	0.720868177876308	1.8261930236548	1.44176365274055	0.286010894668159	0.237966606601928	1.0768647724766	0.236114723559686	0.173794420560121	0.056305440991261	0.108462655446648	2.49515537991084	0.0545292058421067
2008036	20	4.81724903691341	0.0329397925277061	0.204921327046003	0.0541788798571659	0.228721260632435	0.0421931345134384	0.260477196601516	0.77078034111664	1.58586896758777	2.43326767565995	0.273698550778037	0.240928350520431	0.819804328170515	0.152640675328866	0.171096272580847	0.0558556602498254	0.105963837206124	2.19942266443485	0.227584538859805
2008036	21	4.9655850912424	0.104335645440653	0.236432933512708	0.0179172456057482	0.221546721296005	0.0597111503662158	0.751352349313126	0.777397000321434	2.43627953415511	2.22085593841671	0.264769695393689	0.225574167993824	0.536589954336279	0.117327428794707	0.172959427917255	0.0622134228946742	0.110190868844893	1.84093073876382	1.48261081174198
2008036	22	4.37821900175405	0.152449558229332	0.289386168457091	0.0130798291740785	0.215454190126591	0.158693027661174	0.854437923706721	0.862200778028119	3.68501509042335	2.08337296541679	0.254969385151876	0.204712899778016	0.325508150630443	0.0995628704978482	0.203100561190406	0.0817507522276593	0.102736982831955	2.10626240065146	2.6121675569844
2008036	23	4.12585885244504	0.13710083890682	0.414904817388565	0.0152925548215102	0.189878254099551	0.134034390057933	0.780342741867684	1.25301586889412	4.26363191221068	1.90468658344127	0.292099864756942	0.181218042519996	0.159271144078408	0.075197688312357	0.332645407800015	0.0952354788194183	0.0921134578554834	3.41128780092259	4.13302776678646
2008037	0	4.15314291273382	0.00968238680351922	0.507764976825387	0.0292546689447317	0.180223121243589	0.00841929130221225	0.750841527065184	1.33046747916698	3.85223980291091	1.43794853364237	0.320576865049427	0.166654358517835	0.159684115314627	0.0643684728097463	0.404380574227826	0.102614975385934	0.0826198929862131	4.33976174108476	3.87744359986365
2008037	1	4.25664223366953	0.0239040407014399	0.590926165652267	0.0489024789414525	0.1881814503426	0.0356842077635601	0.716593676987959	0.748081909406374	3.5476873450045	1.24369927036492	0.384894309305513	0.152346913507174	0.47781413191433	0.0580327467571677	0.405935126051606	0.0916893606591816	0.0815178349006973	4.46688404421497	1.92069462713187
2008037	2	3.78005847578614	0.189277799561006	0.412691273031884	0.0103130906838262	0.243702953317355	0.204241062539432	0.665591959130268	0.479543615385624	3.54931725762348	1.505887624283	0.786389747867041	0.136681994216699	0.430787893921262	0.0560098924401309	0.222002969916117	0.0489373359328312	0.0741216366519146	4.16639075264152	1.12528034605837
2008037	3	3.8054812102973	1.09191975315399	0.166711541719937	0.00644083679059926	0.210117019256802	0.574238492061599	0.592213036575558	1.2288930780375	2.64540594257567	2.19607088509457	1.10400190577665	0.12744185242032	0.42441464321434	0.0539265951380006	0.131216971223893	0.0315089676877319	0.0662201035708863	4.03083735763882	1.35878325133311
2008037	4	3.60366622664069	1.222322839532	0.0580899896818084	0.0313539422432724	0.131214028009313	0.603822865648288	0.532374503698753	1.56846501397637	1.57245942490292	3.92550249577925	1.13363796867888	0.122449918648239	0.36982584916457	0.0514293002438661	0.084287448039972	0.0217073332584287	0.0604901973761232	3.33735340932319	1.33490770730494
2008037	5	4.13179582905439	0.823267784492878	0.0442759350442724	0.142209945681307	0.111420652164783	0.363853617980588	0.508889370169333	1.75451956493389	2.39341690124648	3.73591393344941	1.11740117412329	0.119636002153075	0.38778503075723	0.0500827783359393	0.0576931562068124	0.0234490873124371	0.0570407349123388	1.86564101651313	0.371091715513466
2008037	6	4.39376825189948	0.19136598439543	0.0187720868288886	0.346109794954375	0.771945519788629	0.243175403625151	0.613395926146423	1.97039755379249	2.77616540147149	3.59650338512248	1.04178963942617	0.119053600759166	0.37402000983923	0.0495510017557404	0.0443441293295746	0.0372499667705654	0.0617927985916045	2.36766601282226	2.14643608384276
2008037	7	7.33493799665826	0.136436216325824	0.0551270626658383	0.344270299705271	1.36875193277775	0.173999882297484	0.862743731397706	1.91415926345469	2.60477926287193	4.00710618289924	0.997818450920568	0.125002404904532	0.321103925590627	0.048077902168504	0.0340340501877648	0.0510829881869762	0.0404838996003441	2.75134962908339	2.78835653807089
2008037	8	8.78834650860385	0.445740828918113	0.293980717857057	0.204475477086536	1.67950512131744	0.331465572884471	0.991546460495053	1.69495339182687	2.46138536791941	3.51051472465373	0.926624255735839	0.14186351518039	0.387347612199076	0.0468577147662761	0.0266888796483996	0.0517072836369187	0.0391836634396225	2.81106847521472	4.22406915932955
2008037	9	8.79116568126189	0.391306911175615	0.157265201859217	0.0446949375358585	1.17945837236515	0.586692458159377	2.20519388663592	1.707044114559	2.60147461397614	2.34908878235493	0.754099145212463	0.172694813637123	0.237473740995296	0.046636400116829	0.0243638774228872	0.0424034496848266	0.0411423630003399	2.94477680655914	4.25758439089955
2008037	10	10.2722788815494	0.0582640150598823	0.102757217142231	0.0378669845505919	0.662649250394144	0.401913848982174	2.20793513157221	4.06809344811819	2.61523134546051	3.49003930437556	0.62930860934175	0.205672820085464	0.121989611686833	0.0467321721287538	0.0696266021708477	0.0169225873483155	0.0441660227673852	2.9092005675586	4.15655111384526
2008037	11	10.4831684816502	1.51351658399026	0.150145492802389	0.0680282215012384	0.498173914865995	0.219541970446129	1.46138966226666	4.90631242034592	2.64889954427528	7.60704255210061	0.569629822198794	0.270325270188686	0.0879643112906086	0.0467841017581649	0.0440113060269617	0.00754642570707846	0.0681144136072039	2.74229754062092	4.51896386718436
2008037	12	10.7427186556407	4.88732442297366	0.140097556490983	0.0902056781780844	1.24989550611747	0.185792762098886	2.71190364212889	2.77715937005693	2.7245917158235	9.22561199044116	0.517939145621264	0.383117277266333	0.0821769552891834	0.0479622157920739	0.0379458664375701	0.0052190042354877	0.273867989289624	2.56581141723799	4.47241467245775
2008037	13	10.9376018474564	4.77905632007094	0.271486762695828	0.958171957812408	3.83021188741484	0.0408124746380246	4.78761868372072	6.40873602791707	2.72883960546605	8.9701097841152	0.461672480905948	0.465386960335029	0.089747579142384	0.047826820115722	0.0409339131680891	0.00668120089082865	0.512184197540435	2.42384617663576	4.56635522004269
2008037	14	11.1708997062779	4.86575226240295	0.392333880462268	3.069770912072	2.60779023550213	2.05067704800042	5.62748395861727	8.14247193727275	1.70748289211855	8.77549715595563	0.421826827501762	0.500345688655267	0.15902052587196	0.0462797913181178	0.0446341501615452	0.0179963135925284	0.327781577699449	2.208765958413	4.39122375935638
2008037	15	12.0326751431014	5.49900535156391	0.304290877673103	3.54903081396486	4.26536737138782	2.2138573682776	6.3933346000998	7.86601047218765	2.00758656017113	9.50786203427058	0.42581995472389	0.511570918919707	0.367697816305803	0.0442057999527348	0.0466784392013293	0.0725716708960739	0.205820081367015	1.76954007803692	3.78464519408159
2008037	16	12.6907061633996	5.38978712580496	0.234469036461242	3.76807142363192	5.80719365704278	1.97560685837876	7.55004461117965	7.14076630551896	3.41205832356056	10.6541486483989	0.393276108787973	0.462152965911802	0.914207692708021	0.0433797019529283	0.0394171167183427	0.0141798120631437	0.167315853249885	1.48661403050562	3.66078218377976
2008037	17	11.7572003053077	5.40511934421567	0.183731529088989	4.25929551420232	5.82388801329329	2.57688426523183	8.63420423006286	7.09469513223958	3.80203357649062	10.8181774749324	0.372992176562317	0.367862027701884	1.96055592444825	0.0443721853776046	0.0357406053289289	0.363394655783046	0.164621450514844	1.56104994288603	3.62042076709139
2008037	18	9.38187116123478	5.20158422242296	0.138509626366317	4.15882765116853	5.98255891816124	3.02992711208729	8.81743245789972	7.68098629999525	3.45873358111861	10.3299473161741	0.362058539407691	0.311560353877751	2.49442883003461	0.0462274386439985	0.0253532544636875	0.576852219502216	0.321836259168346	1.85926874751569	3.56228137342217
2008037	19	8.41711555237362	5.16213649985174	0.109409050900779	4.15618528837321	6.43496613589114	3.03939767855616	7.73190831752733	7.18773375718435	3.42148985750141	9.07833416007944	0.330224952478002	0.256348751395548	2.00109851751749	0.0531724205446975	0.0167565955621266	0.590308188162767	0.843254185094686	1.95130277971555	3.46992598696891
2008037	20	8.61432374856252	4.30261275668275	0.129632415563072	4.58770027553168	7.02635212650777	2.74924465946181	6.13661436588325	7.00782868060396	3.52098342873787	7.35830968103516	0.291186605485625	0.213355413824283	1.4749474112447	0.1061599316469	0.0119443514806708	1.06321087453936	1.16278575471491	2.09500332531528	3.06333103670263
2008037	21	8.01401080327435	4.08240484830719	0.183370750206003	4.35231311089799	7.29948737553931	2.61769277409431	4.91555898510132	7.21628302762195	3.8036730649552	5.92862226347672	0.265167854017595	0.20369257846774	1.0819759357191	0.350348336763006	0.00849162804713089	1.32830158673562	1.26693715428116	2.18963977761605	2.62707580007625
2008037	22	6.82582765825368	4.81265063960666	0.244154741538049	3.43022065310732	6.91904274994931	2.34379371448018	3.85834203528858	6.54376548819579	3.91415934789725	4.99028744390085	0.252387789297317	0.209119906006331	0.854704347048717	1.69925056644919	0.00724248982681248	1.40855037695486	1.44723186915043	2.21129261720624	2.28856802309812
2008037	23	6.27989349434068	4.63046783484931	0.246624111026139	2.9749081615392	6.05267216099048	1.96303527262865	3.12671921597497	5.38457118172401	3.76375009628276	4.21802548137138	0.23838824158496	0.22768901786549	1.34516096279147	1.83865019533896	0.00813361460762198	1.27487908774636	2.37418511806809	2.15285476866174	1.66156669218159
2008038	0	6.03072097781917	4.45996242277775	0.215335413347349	2.98868776637956	4.80020396526763	1.68301569357998	2.77423430842354	4.44377537078714	3.83064967843876	4.22114890804678	0.210230546681442	0.251107954000468	2.3446474666796	1.40206160104949	0.0077932214284796	1.17421287762059	3.42220119378486	1.91585027876827	1.43357447118552
2008038	1	6.34203091996334	3.8610347310451	0.18632714488277	3.59736438247025	3.83597482287919	2.29160080829808	3.07248706458571	3.42930727992771	4.19099130643734	5.48628213791951	0.185805021074805	0.256826229970884	2.8468044890895	1.04520825878873	0.0932996932862478	1.10670207901645	3.41129163575996	1.68167803197367	1.35270094388111
2008038	2	6.68987406018739	3.47732699699572	0.157699108091604	3.02268434192445	3.12274151981374	3.00104915480733	4.08657856357137	2.96281576726576	4.24457761547073	5.98704955945023	0.180966716047929	0.241668856299277	3.02332438425158	0.827431635443994	0.236864464283671	1.08383165625582	3.20450098482171	2.71244996789518	1.40008602763442
2008038	3	6.68904107720952	3.47054466301168	0.119481355455098	2.388404617179	2.75803412962056	2.86393914538272	4.35572761820853	3.21799372239509	4.79784726006158	5.63401242213502	0.196144660207643	0.212334385509242	2.91052487190203	0.76423161564317	0.405914295131376	0.820249538357007	2.95225878312113	2.87244184224715	1.52412116126699
2008038	4	6.03250824404405	3.35988384106497	0.110441528835359	1.98857037027725	2.97397472774726	2.20796897642106	3.97349714043596	3.96388807950953	4.12987857627217	5.39300911437332	0.229273873613938	0.180650429994614	2.60340784288127	0.669213965232445	0.665372790646287	0.98840399245149	2.33607541466763	2.17655662332173	1.52991781468296
2008038	5	5.56959803798075	3.32083581246068	0.105808068346684	1.81682502015213	3.47585443839909	2.30067570277348	3.72297364324509	4.31911253301072	3.63104288796304	5.09403520335462	0.247355094333392	0.154534969370437	2.05423408538425	0.554338859493048	0.758493548672708	1.56866661287469	1.43546054935946	1.67035074661146	1.67054080980365
2008038	6	5.37678441452421	3.48403005602375	0.110926270186622	1.81657550333627	3.42092151498731	2.16226104492594	3.54360975480063	4.15725084573599	3.1767943125966	4.73857297549658	0.262105912589388	0.138319134448877	1.29271445589917	0.414526949438651	0.911858497479669	1.5024876216992	0.819105786546509	1.28504482844662	1.79869767578217
2008038	7	5.24849488517376	3.566186761502	0.110560833527965	1.86413209374043	2.85194261436718	2.13195464740608	3.30637683873625	3.88467142563789	2.65578361800197	4.32082819689488	0.2680692030249	0.117455272610492	0.83099913361606	0.260383540857217	1.00379558442518	1.45954009673801	0.750977574624288	1.05682964128112	2.08957014363627
2008038	8	5.07366141008169	3.03988475071338	0.109170479480887	1.86395063762193	2.65127634874356	2.15548889985202	2.84992968711188	3.50767486921964	2.23669986158959	3.96598148118569	0.258434441791758	0.0988846657516285	0.647170651732749	0.207540183873653	1.01660252043672	1.18157167569228	0.907114732519486	0.948654811092513	2.15260734550872
2008038	9	4.74010869810362	2.71235009471707	0.119440247213176	1.99477304664961	2.53067919522536	2.04681086995832	2.3873117692647	3.01878755142601	2.01149936959818	3.62294018463298	0.236738351450852	0.0752563506709683	0.771293088093498	0.224950516032615	1.17961073825183	0.983941238814954	1.02209592901548	0.849215592949078	2.0972807394405
2008038	10	4.11779134046731	2.48405123184844	0.13068505273863	1.99641545766985	2.36286953447611	1.9939167923826	2.02328514818808	2.5076853219801	1.74314764153857	3.39027045778835	0.224790781628971	0.0662853306374397	1.04563189137664	0.251361346794928	1.28233485200567	0.867116572998681	0.988177748365268	0.740378250494032	2.11036104234707
2008038	11	3.0915470685033	2.05358358550926	0.428544628260821	2.07107588785489	2.11882609498514	1.75179112671286	1.95774058998165	2.19247656133482	1.50923945741992	3.31089967548904	0.223228124314554	0.0593458351530019	1.36581240196526	0.277561470738229	1.258026837875	0.834072303981475	0.785978388422737	0.646823499013189	2.11659796077238
2008038	12	2.54025894161523	1.29062592576703	0.401573564635209	1.83917601813549	1.87188561216288	1.5860721817559	1.80035902470175	2.05805470984904	1.33931039135207	3.18837439238608	0.222178212159712	0.0569442058065269	2.00708187080226	0.349591572782383	1.18223679287028	0.869081203674989	0.581152983931578	0.643022181946752	1.60708995772193
2008038	13	2.21783241882368	0.954148944467039	0.270883008659558	1.67575643922554	1.65798600991269	1.37852180484526	1.75987909080467	2.21075375355947	1.29791872215905	2.9362324222388	0.23437393455329	0.060378469009773	2.03794585838309	0.368301979764266	0.927895967235645	0.791454417622743	0.558166766326329	0.693551662743187	1.06762753459406
2008038	14	1.94259042975809	0.758052896863503	0.223239188749952	1.62021730425284	1.46293220826037	1.07774335412181	2.17210054572433	2.67270344924672	1.28044265901094	2.31334331427336	0.244828438048989	0.0641391901851016	2.28446547242158	0.384850221315473	0.695558111873729	0.714422423374495	0.491231087358336	0.795746170175172	0.829369094956974
2008038	15	1.87282874667974	0.650703413900554	0.196792155964085	1.64358511795179	1.31431859874745	0.763213789218736	2.49699869593923	2.64959411574255	1.2051565903406	1.75211871161824	0.240035305575819	0.0659032514333296	1.70107221391322	0.418910435976969	0.533290817468611	0.655428894336275	0.348700652375164	0.8752829120106	0.785000826710906
2008038	16	2.11906028511277	0.568852687828367	0.179633674700757	1.56666910243285	1.20648336779407	0.596666407867789	2.27531095277821	2.38496928463897	1.11011079953723	1.46167223660181	0.241112770726406	0.0675856018255568	1.52730709152246	0.445204836414508	0.384121856046486	0.62169428214151	0.275535015451721	0.948172313346563	0.823482143236286
2008038	17	2.52328344891515	0.470358762850939	0.144877248914705	1.411899008081	1.13675339866782	0.490156094135015	1.66064333477822	2.05235848337504	1.01208864385064	1.43788778643575	0.2507504829639	0.0700359312426076	1.9386348936458	0.424814918550368	0.271605297272285	0.600865882398929	0.287878869347205	1.06194959384613	0.738364193394655
2008038	18	2.64596643293877	0.458805233323443	0.112818445164821	0.688203042416506	1.11496897983982	0.408353391741264	1.04468622433317	1.68586800194473	0.920347817674761	1.6603209321323	0.259191607026035	0.0734297208925917	1.34934070604953	0.641948045448094	0.213596836555897	0.550884098645007	0.335621810604871	1.17227068875304	0.574902382399533
2008038	19	2.63177021963604	0.614536303354387	0.0873284463745065	0.56925766833062	1.04063796505818	0.367358964916958	0.757958114202596	1.50695508774416	0.835929881741339	1.93270251893286	0.274134393570067	0.0764786832356984	1.01095970520802	1.42723772916213	0.181116385088494	0.548684878992821	0.381511978695332	1.21398682232056	0.426449639905502
2008038	20	2.54654752061292	0.851281615921851	0.0852717222008943	0.488157478894836	0.965328419079871	0.344256701706351	0.844213604249052	1.50921783837152	0.935965875966382	2.13600602859922	0.290213880345276	0.0777657585679769	1.44019361190266	2.10397805085448	0.162556867247143	0.543715585832585	0.378475116811433	1.22212681191007	0.32541695942858
2008038	21	2.48054200050113	0.90338776572811	0.0820316363274945	0.397608716397497	0.938962507457471	0.318935015908202	1.10687124148232	1.54146236399463	1.54261478784705	1.72378354109343	0.305976283150352	0.0738837194326872	1.39091848596636	1.67961268145617	0.15223592521675	0.542771885065948	0.36133852189014	1.5226589287762	0.270902960274998
2008038	22	2.71927273706739	1.05990710200341	0.0812125024661099	0.328411689117596	0.947860727662708	0.289057124515207	1.35117930623453	1.49774069604908	1.79320974554335	1.27290084462013	0.35719302421942	0.0653832835801935	0.480616401196857	1.34857719636173	0.138431520115018	0.513456539205343	0.360704181885796	2.15603572988482	0.270483044068097
2008038	23	3.2204640963774	1.16165327995281	0.0855349084659865	0.284679646384947	1.03193724743733	0.262825790793036	1.32407201507017	1.34248492569773	1.40441599052489	2.01908542745887	0.377472636952238	0.0597979106276173	0.19282251038295	0.898463268832817	0.122388061821996	0.483856222166026	0.355250408864644	1.99845439952316	0.331423770459689
2008039	0	3.76792003248971	1.14413014746826	0.0972196540731056	0.273593827664953	1.1198535480371	0.284864210932635	1.3610325446958	1.25284475313603	1.23683530119633	3.50156563180846	0.390804983618931	0.0575531995126336	0.244391365181398	0.715326394247281	0.104634287980181	0.440544326414118	0.335476049053852	1.61377209336924	0.413991316138907
2008039	1	4.2589687116588	1.10992972326967	0.12172217820716	0.27992685756729	1.06838552475512	0.362468292994853	1.6624049223445	1.22866257000444	1.53110977084265	4.00937625103352	0.419883630545122	0.0560382486197732	0.210433162513944	0.573437261528642	0.0835660740459341	0.400756648651572	0.305447264041065	1.56146805459554	0.448519785958643
2008039	2	4.11477713801853	1.07228902594352	0.161873651353746	0.332464397762607	1.03982677994252	0.448429216344899	2.08565316316188	1.2314141633144	1.32150192280844	3.34815647571912	0.446436769655018	0.0555634746876404	0.156963611924695	0.498574015381438	0.0628465354048078	0.357118161134483	0.280720703260818	1.68956313440383	0.476104026072266
2008039	3	3.81994197596526	1.07878761166527	0.214707686109815	0.377305888451493	1.11872758180962	0.514504185215837	2.12260777098357	1.36545559571756	1.3467908540703	2.03458936377571	0.457442024575743	0.0568209090872898	0.12465134335422	0.462868784559224	0.0467409991379923	0.322480362716293	0.250862468066114	1.97391979824095	0.4952246588728
2008039	4	3.43006713217354	1.1270975653048	0.258093623151068	0.494530285522656	1.33820957604663	0.564071442807871	1.46758475142978	1.46345492580802	1.99909505666934	1.75797750410034	0.47171486572431	0.0576316973926637	0.109426562002596	0.444790827516099	0.0359344139046437	0.296420840915787	0.211545652920194	2.47844811229835	0.509503386478596
2008039	5	2.94953612117833	1.16716621604307	0.28331368570018	0.665963088312241	1.33737186995612	0.597224650945734	1.03223180211451	1.45261922900608	2.52624472271789	1.70448327206592	0.552225427107948	0.060288265869963	0.105771193943717	0.429822114030145	0.0346864397795768	0.268200948326608	0.171365730337308	3.22023336155638	0.536340049019571
2008039	6	2.57661947427566	1.16947962481826	0.291041760140807	0.867622158071833	1.23155949620273	0.634677339934651	0.978552838671424	1.38068450230853	2.92696019973381	1.60578202971067	0.603566954740227	0.06441116359833	0.111338704422114	0.417099270254943	0.042199981607313	0.240719941297872	0.174335775020554	3.34349426833763	0.572561264656976
2008039	7	2.31722395800329	1.13389617277751	0.288608682152209	0.972654419362081	1.18985054134828	0.681028466933971	0.918519792810267	1.27570247421584	3.0338488376024	1.52452305718192	0.541000901059203	0.0716883204743162	0.141243043020926	0.413417059953784	0.0534650361949762	0.215776791531109	0.173449061848281	3.133249482536	0.6159679328824
2008039	8	2.26764398913901	1.06894161647765	0.284634784385904	0.996971373282451	1.19738273813386	0.919938175514573	0.8462678397243	1.22376374308994	2.70265713048919	1.47433510908272	0.500270212984596	0.0901389928921864	0.19090144154368	0.422170204452488	0.0976278872556089	0.204681660103087	0.181454418459849	2.84636744010653	0.652967840643369
2008039	9	2.41178925628991	1.00161272828038	0.467839178671716	1.00441659431945	1.1639298705663	1.02907743148329	0.752707245723922	1.18536596167545	2.48087399528292	1.38796596235328	0.463984109912771	0.118016088494316	0.314117562687018	0.484168587704374	0.0842368334343138	0.194328712652494	0.220722401522362	2.75794803970647	0.701157980060055
2008039	10	2.68504548017303	0.930403119274834	0.677549482483992	1.13459908978716	1.12632230342241	1.229106490482	1.06994495073356	1.14839254854643	2.75898141103858	1.60568971015724	0.452206070949187	0.141642935341708	0.6892380126932	0.538659842684546	0.0984810685135358	0.165820237357852	0.298867162380345	2.94614442260625	0.719845475465614
2008039	11	2.75287619916562	0.869636670770062	0.717772499518175	1.11002257448555	1.09270564251131	1.259906126876	0.9287355831139	1.13224501414418	2.59993249216025	1.42210089518004	0.457070827988313	0.148150799660022	1.27812601567794	0.60759547494147	0.0805680603082018	0.150180220131251	0.387331845653471	3.02507612726369	0.725308365645166
2008039	12	2.83274868875985	0.797198713193213	0.656523783740656	1.08082959385679	1.06878199510482	1.37821361068872	0.774307166222937	1.13237971931118	2.02819392375838	1.2912490211559	0.466910204657828	0.155994071791982	1.98243341738366	0.743948418104785	0.0606310476307585	0.14571980845289	0.542322910921977	2.85304843857511	0.681832604153181
2008039	13	2.80840291040476	0.705325682952946	0.456216417744456	1.03592424723026	1.06720454016165	1.44195935345316	0.68167644595848	1.19737176101756	1.38055059935722	1.05692550876165	0.477306786681972	0.148721620719315	2.53929762424433	0.681059938314722	0.0547680047265045	0.149433141981454	0.701128033576661	2.23784406608595	0.591928732620185
2008039	14	2.76514622639378	0.638852918088352	0.334406196740778	0.977432966943357	1.04761823412569	1.41211301541894	0.601098930733697	1.40000118243252	1.23750536566416	0.985845378003086	0.457992211545168	0.150549036776401	2.64783145565568	0.617228505914594	0.0526658876722476	0.173459926405859	0.835687466410789	1.76942897323418	0.436251277769197
2008039	15	2.71951834713951	0.607093966799055	0.288941218059746	0.937912382894335	1.03218197218452	1.40451516166695	0.560168207827103	1.87212865952835	1.28944916356675	1.08626531102639	0.431629171915233	0.157608390819613	2.33532020176551	0.582802712527684	0.0515104990744169	0.193845322378283	0.882544171913623	1.58814178397226	0.320929481898641
2008039	16	2.521646977239	0.57562395230111	0.267819213676594	0.909481531491184	1.02671899058567	1.337917737278	0.566912034695878	2.14502228866797	1.5758481495834	1.37803040475033	0.446274980610404	0.160678550121705	2.14857188860881	0.571834725222172	0.0503975247114481	0.177937085425526	0.838921014715599	1.52122222962275	0.243523219522064
2008039	17	2.1146614578827	0.538537682562783	0.268878403675718	0.878269979332568	1.06504146477446	1.26939196927973	0.417270466038652	2.40997016111462	1.88127107072031	1.65133867745019	0.551090720550447	0.167377909888694	2.05228415402104	0.617352372514017	0.0485615875479562	0.157115595677542	0.7864850453332	1.52559226845	0.185992273103245
2008039	18	1.98714691420544	0.518962962750459	0.293836755352173	0.842048112580858	1.12108667596747	1.18400029859915	0.513661623803693	2.45573502874209	1.93404947561372	1.59447258205087	0.66980906563498	0.271364523570371	1.89888555973152	0.764448448670788	0.0452126134473564	0.136939157754191	0.756419229634008	1.52922520980794	0.153391384385064
2008039	19	2.01429369277413	0.50769342673971	0.315981491420697	0.818093357701132	1.16104868491791	1.122569508092	0.634850113447631	2.33770079449573	1.801380072215	1.72940804112184	0.714983811961853	0.481994899930177	1.70656665867606	1.04626199457716	0.0420937207211306	0.124465669047556	0.75901853307501	1.53484551616279	0.13867088926578
2008039	20	1.93386488280466	0.488762096806712	0.332181406642078	0.804439361675476	1.16994544912268	1.0664606952105	0.756378501036402	2.19659292817982	1.80499678847705	1.61667482225979	0.772436831777368	0.704162636937111	1.46548409770607	1.364398941876	0.0392260742213276	0.116353526054828	0.766244211393608	1.76093578733083	0.137641679952216
2008039	21	1.74796790500531	0.473885278728113	0.370906098709014	0.79368558152027	1.18659199629012	1.01877200504533	0.902713800816179	1.49250083683384	2.13824894881555	1.65401596212948	0.947622244990251	0.770437263349597	1.29975251235496	1.5279644922953	0.0367697851034102	0.110314452087912	0.790944082809553	2.1692467349748	0.167913664046858
2008039	22	1.58503869056208	0.467843164791006	0.409767106016554	0.794400964814031	1.20496286555701	0.988261263681705	0.991380505135852	1.30402681753896	2.63689378401773	1.69800522502085	1.10777172790371	0.747409261823202	1.2153823897179	1.43413080296871	0.0348030601594078	0.104649177650166	0.819208904367433	2.57728741158793	0.244288311492408
2008039	23	1.56061599590859	0.474356800523936	0.445679204636076	0.808121062992218	1.21653692512153	0.99050831775345	0.974804264182374	1.19422678901661	3.10791596665064	1.77968324692354	1.24166944945039	0.841049279497525	1.20365021969192	1.26457994445617	0.0332458093770012	0.0999428139197305	0.868319112721508	2.95295453192087	0.364983780832866
2008040	0	1.63136665588319	0.491240629060225	0.493093188780275	0.797420432248608	1.20853207801356	0.951314311481475	0.983858105026608	1.12758863680912	3.59053571410715	1.72172456603386	1.22222505017792	0.763182944045681	1.21507367044547	1.13163293144629	0.031924887255822	0.0971608171932762	0.905942610741848	3.36892454313484	0.476112911448101
2008040	1	1.73319890058864	0.485708757506744	0.54349686416858	0.769946007373333	1.1954100822508	0.899896073777918	1.01078492729701	1.1282606149783	4.20603603168315	1.40268897469605	1.05765497644116	0.589240578120583	1.27678736828887	1.06186980631251	0.0307049309682954	0.097458835066833	0.914976590105275	3.8080489008928	0.53635968455045
2008040	2	1.78982849929492	0.480197411117251	0.572453572158413	0.771146448758183	1.2191873205377	0.833264679545565	0.965322944796463	1.17167470683829	4.70332009425067	1.14655911852709	1.0597670590301	0.484633415996731	1.30546000024284	1.00906771449229	0.0295314224518207	0.0996316518290152	0.927077091224523	4.18044911679585	0.575669700751859
2008040	3	1.73804289551243	0.474358531612407	0.574764517002169	0.79147754500926	1.27967278845581	0.763396278045986	0.903023488463798	1.20697356473645	4.9218129028419	1.11547198645575	1.18677651336453	0.455165055792922	1.24227488105894	0.92030034744889	0.0284387872587386	0.101465353312782	0.937613331176685	4.39196517935023	0.61440842139634
2008040	4	1.64411553282012	0.511905045946747	0.576043560241103	0.818358540269722	1.31270613856105	0.703793691744047	0.854274566812927	1.22931794228864	4.78184317421756	1.16812026535142	1.33728905354997	0.459323903661864	1.18073054288685	0.839819266182711	0.0274578265173458	0.100920638878579	0.954158792746656	3.92306261996538	0.670961797364402
2008040	5	1.57756822427184	0.529828962266274	0.574094368283562	0.858954106349297	1.25877892489773	0.660340510643787	0.823440003642591	1.22160032711529	4.3723843399679	1.1862232189632	1.55228741329358	0.414124066067126	1.12620508687436	0.794144847433738	0.0265831324030255	0.0966425609748975	0.993439972216076	2.73549611887793	0.707278136868408
2008040	6	1.57423429339613	0.597227483768586	0.572036140105223	1.10474731395334	1.18022288882679	0.629915678495414	0.831429392676875	1.19893865258831	3.28714734545945	1.1621889971437	1.71364882243928	0.393764788274862	1.09049154462979	0.779638307048301	0.0260922474987407	0.0895708641165841	1.0186728869584	2.39674819325033	0.709009047851291
2008040	7	1.6564204101213	0.633674550967424	0.570580475907203	1.08316711068995	1.0873192366475	0.614492673937777	0.830674483722454	1.11940118364662	2.11413745327414	1.40104141999901	1.91542572431308	0.364252171161354	1.08008234460967	0.802572166608896	0.0267468169701913	0.0826379474758179	1.013891851915	2.3405572116456	0.654930509504024
2008040	8	1.74105208248062	0.651733673224436	0.588769224632784	1.00752160688776	0.998958314229234	0.579776157415917	1.03451941420109	0.975711995660855	1.99346958898578	1.362132586825	2.23602942204659	0.331928852988141	1.05886159787776	0.821203463389315	0.0388583263096521	0.105282315310994	0.994511123101364	2.3688022456318	0.53767965773162
2008040	9	1.78544156533439	0.664519608472557	0.693158829430897	1.07766270045101	0.932933402813505	0.532452110569744	0.903994918618425	0.847955819805404	1.98947605774085	1.38633475236467	2.48677309391836	0.351290888561245	1.0208304508708	0.828696358766637	0.046791145850773	0.135067869285648	0.966858199073951	2.42199365173785	0.41853561034719
2008040	10	1.81985642539931	0.681179778911887	0.749044647210947	1.22995060096411	0.881941403252177	0.486694346576449	0.670534791852241	0.770527247788	1.95086967711387	1.45574002730151	2.52572675110557	0.460345180225709	2.17551074752707	0.831270525196557	0.0702884699234197	0.144311826457416	0.934115978474772	2.42489289536996	0.35533812701509
2008040	11	1.83318895964145	0.773243696319411	0.785269626711286	1.15240030348267	0.847035311686709	0.552038060797794	0.604432370625185	0.715210285907527	1.92278618612142	1.47866095238926	2.44912074178624	0.533843466911585	2.05577195273443	0.806371873042104	0.224901652055519	0.285598750114606	0.924693230373967	2.33963825729821	0.362560662233365
2008040	12	1.8099430618206	0.759259377920547	0.723207348929363	1.03315283046336	0.794125359900797	0.588575761625543	0.523534214462046	0.710128463306211	1.81180436756628	1.46606639925051	2.41629161031889	0.507597003913383	1.91474544802068	0.73935192967976	0.296039688350175	0.309365995936316	0.950062456416331	2.06474346541988	0.346218129586781
2008040	13	1.7998296860365	0.702428592625737	0.662430851837619	1.01181545250745	0.738005993945151	0.583795934763675	0.442528409534393	0.709013596646012	1.56534145787808	1.4635216955416	2.38137816130862	0.4496512967259	1.85476401023562	0.647404765042538	0.310633059421907	0.310787682407829	0.975076514386294	1.71551111234333	0.414186998548467
2008040	14	1.76572732622745	0.695164913316731	0.611759458137615	1.00242931687318	0.686864298199046	0.535187126089563	0.401228018974538	0.710642352276469	1.32689190634402	1.49603336035237	2.34478487561747	0.454434254994297	1.80185693992412	0.584609419687916	0.306721310283305	0.301758719017141	1.0078401477294	1.40025478158991	0.401393615241063
2008040	15	1.68564199527724	0.72027289678663	0.564257947070392	0.985149610576041	0.675473567615636	0.473565574947677	0.404587887453601	0.722271439132424	1.11613517544914	1.55254466846394	2.2591841008361	0.466125301050923	1.86960787217267	0.544884330360752	0.305343522019449	0.282781105437173	1.02229613204503	1.18040715915386	0.383743000231225
2008040	16	1.60788921742365	0.725454146531504	0.514061678771388	0.939899788466684	0.7031084139236	0.421428545825749	0.445007235042745	0.758206033030047	0.968281300255135	1.5803937021609	2.07318228200843	0.49023925916638	1.63824077024559	0.515824996047735	0.297963477749304	0.259696305844395	1.0160580752487	1.06442104243029	0.381467038822289
2008040	17	1.54503687215411	0.712720135650162	0.442120282682432	0.889857955535719	0.757640550042941	0.372635630378071	0.461645999735452	0.813412129502412	0.828745366414625	1.49454247959876	1.92808377725331	0.517153413042846	1.41836543091634	0.50373611535453	0.270519696947507	0.241683220853965	0.999920385211497	1.01136467552024	0.408413435170852
2008040	18	1.55583186973226	0.695523414599359	0.374084132007903	0.843939881255691	0.827807363304611	0.328976526556122	0.481507752800916	0.875024208163517	0.736448551802999	1.45448607115089	1.74209030679166	0.554453429922789	1.34772679581002	0.504680234048309	0.264859866682285	0.226149910305225	0.974803299546465	1.02804894666495	0.456673449979209
2008040	19	1.64303228509292	0.67899249290875	0.31048579725052	0.788436524236033	0.900879713937143	0.286751134164321	0.538294862751919	0.974937506215507	0.673786110181446	1.45568946395556	1.49355981667348	0.565907766806862	1.43142579989221	0.505941835570473	0.276259619661895	0.201535204225504	0.942626389822621	1.11050436186323	0.469958662310202
2008040	20	1.65596484705359	0.681421514534867	0.252187814305034	0.709902161014938	0.980673528341568	0.252923488776133	0.528418001332325	1.07740853526124	0.67405781705663	1.43703857696745	1.28078125026504	0.580876728232571	1.83613241195843	0.507591522608465	0.269120999528885	0.177123053787576	0.917166950407764	1.23507070510515	0.453936163445689
2008040	21	1.61289360038297	0.688696513380946	0.198047059611323	0.619438094517137	1.06244446130534	0.226038868606561	0.48554370158215	1.12106972859968	0.75111266188397	1.41875251064502	1.10682873381391	0.613954125123317	1.83479834559628	0.517522215764431	0.264083663194145	0.156133864227081	0.903188708656774	1.35179126931774	0.436808844949749
2008040	22	1.59036591432168	0.68332106734929	0.148646989912958	0.507123596087364	1.11939546580148	0.204698217213334	0.450881870224983	1.13295387096471	0.85139728424656	1.37275560881341	0.963308578821094	0.62015734584562	1.83976100320258	0.516537921975067	0.255916451752038	0.140377654928549	0.900821469047479	1.44837327132137	0.423985062746311
2008040	23	1.60981971155652	0.67027431662179	0.11211579433527	0.418658368870056	1.13792858618705	0.189530010712437	0.517594752258091	1.13190795351677	0.971998080902039	1.32109321809257	0.853834594303535	0.591981739722934	1.89312220351994	0.510165708793775	0.237628460353334	0.127617633543324	0.886927887377737	1.5498721523475	0.416018551149508
2008041	0	1.65302529531741	0.641976012553612	0.0915141547596134	0.350050375023072	1.15526253359524	0.184599974284158	0.728744948287543	1.12504795040709	1.1204376872149	1.26941870367932	0.780802804153323	0.560666885439296	1.94488907899993	0.508921267235131	0.21203542156231	0.118108757244907	0.886937446584521	1.60079752997298	0.413479459183156
2008041	1	1.70007055411595	0.611769592550413	0.0792538094141373	0.301960875380291	1.15318930521096	0.171685487949434	0.872879868914203	1.09466215275893	1.29983718502296	1.26044478795892	0.721822716015023	0.55031993543379	1.92557316180896	0.495905336412837	0.186217357892239	0.110422832043492	0.878792148229543	1.64473155092576	0.409235556537921
2008041	2	1.75365255716888	0.578121487787871	0.0700625856424953	0.269557124354685	1.10113204124468	0.15314514218717	0.96863099656671	1.07162532890815	1.54981762704951	1.28358070813763	0.666002000853401	0.584738489722641	1.81187569747125	0.474165347472719	0.168964527409298	0.10320546432273	0.871138163559965	1.66054916912745	0.400031725457586
2008041	3	1.79696617365725	0.538807561676889	0.0626741241837198	0.245348840692052	1.0412024341925	0.139185517473834	1.01041115949179	1.07424181860017	1.69822798123068	1.33082541225243	0.61510894203884	0.639344613241478	2.02442034503093	0.455689770521018	0.171809253640384	0.0949487590461592	0.851617277670575	1.67403159259503	0.385375033891171
2008041	4	1.80909480708372	0.487262291065517	0.0565418555406209	0.221228312935527	1.0064622937404	0.128465039025267	1.0367317652233	1.09531005365327	1.70923261484454	1.39103986317864	0.577049637762369	0.694482507340655	2.00786595619911	0.440140724005685	0.189050179365445	0.0859895394093293	0.807900430528591	1.68278688303333	0.367963784240445
2008041	5	1.78784998915432	0.449290086403345	0.0513623200983339	0.197862462850497	0.994814840756444	0.12047532474711	1.06638014414906	1.13641399275782	1.63248339778088	1.43943132483481	0.558555104382538	0.739984825748941	1.95572337024898	0.427003305633934	0.220204731264895	0.0789929438399221	0.766951271291378	1.65782291825794	0.349513340504374
2008041	6	1.74550965260474	0.419381585781331	0.0469751321768027	0.178651247011463	0.995517852528169	0.113174991924139	1.11481410320155	1.196452003689	1.64433205720246	1.4883039833719	0.540389098537111	0.772105917950528	1.93224267662691	0.413539018512396	0.246809340649486	0.0732899000183934	0.752423019572197	1.61421053832134	0.330291351163217
2008041	7	1.694692089473	0.389693688958788	0.043507354551154	0.162927740796263	1.01428413446912	0.106950293201144	1.14019165585845	1.28752242761388	1.6506176620024	1.51930908828782	0.491999587549678	0.795480648366133	1.83618337287383	0.397779281696	0.275049368531116	0.0822827564580362	0.738509017644717	1.57843931553741	0.309341999422507
2008041	8	1.63929848394089	0.360267431715716	0.0411142320008759	0.158462441874246	1.02464272167734	0.10443466416848	1.19721368212024	1.38874807432917	1.61175317668423	1.57282987785767	0.454507505301201	0.821247365341347	1.54203636247495	0.378925005449691	0.311094963447172	0.138245205779893	0.689953803925933	1.51963739853525	0.289267068613031
2008041	9	1.5967593187182	0.414202888512448	0.0582950725397986	0.161612468714611	1.03097640602922	0.130248206185428	1.2606780098377	1.51788878432256	1.57539650323156	1.58882389564769	0.458747945617243	0.844040089688596	1.70605351159947	0.359201434674611	0.338074029988812	0.207609411829974	0.620716711317218	1.45953087489738	0.269848952899867
2008041	10	1.59794237719122	0.38993233851811	0.103630203625337	0.283865488771757	1.0122992319534	0.167060169667201	1.37152532329447	1.64551733510981	1.6113283792862	1.52629429207997	0.480474336933448	0.856812807516211	1.77566021726863	0.337946633847264	0.393994585211242	0.186761305944822	0.562613430432933	1.44386188883821	0.249627873864124
2008041	11	1.61927410865548	0.457207020165121	0.164319095855556	0.264906915120106	0.968748299396546	0.229147225307125	1.34149586005114	1.65949490202316	1.7009398158734	1.37189549722808	0.517556638813745	0.858882197129906	1.6610682523138	0.326791494109462	0.436474363082116	0.22791926395063	0.561250889360866	1.45396629953064	0.232757871679945
2008041	12	1.62633541024907	0.457963718932299	0.182885872188469	0.307865738189008	0.903131954867681	0.229182342090649	1.27819006299649	1.76284332836962	1.78794030815361	1.27780620884057	0.52854192637441	0.862900610102029	1.62277314185493	0.332296798157836	0.467419995517605	0.22870701432964	0.594434352974293	1.4603161474352	0.25392965588894
2008041	13	1.63509465475994	0.416622983193161	0.166516667831	0.326355597104943	0.88270175503194	0.279077893899446	1.19318520444819	1.84527239312862	1.80466960937089	1.28153678358186	0.726724123538358	0.860550253701483	1.5509940963979	0.30850733168742	0.44974566471084	0.208645365876908	0.576706375651657	1.41644632583351	0.335518684165204
2008041	14	1.62926186259488	0.392687536160475	0.159251998327154	0.351204531024998	0.872188810855786	0.293575457321786	1.08311078044018	1.82869641479335	1.77993219009852	1.35802813777662	0.844838291578447	0.836927393192663	1.4666404733323	0.228215959928707	0.422630020801322	0.197067219686724	0.540757843635653	1.34829055296502	0.291107392649862
2008041	15	1.66461064092319	0.363585450954383	0.153251205824705	0.320127265246808	0.855129964886816	0.276303738202807	1.05162701132323	1.79291072632834	1.75349506514945	1.46984310392902	0.917705822263232	0.781270051143137	1.37018003680204	0.142235287675588	0.401418028369831	0.182521440810873	0.519420121482371	1.29833095068027	0.265195614875134
2008041	16	1.66894878023725	0.341176755266639	0.144653852562821	0.299266879863424	0.85535191581933	0.261362992120604	1.14403994930815	1.73250244333019	1.66560765741183	1.62052782889944	0.906095587291602	0.720702804421751	1.20374885746394	0.121082384411664	0.384987204012668	0.179704326031586	0.518410101462609	1.35255840370399	0.242742394599807
2008041	17	1.62462583729733	0.318721616646953	0.133608801766466	0.272058615903408	0.872255122818776	0.241556774259813	1.32535120912511	1.75450006940364	1.51502286204087	1.81799753072068	0.890567535584296	0.688960242899541	0.994798553773069	0.128842677506321	0.373978991293366	0.177963091323986	0.496183902100272	1.55642704566716	0.220396542655412
2008041	18	1.56679835081561	0.296643219983213	0.120835856352223	0.25546956475702	0.899719385274721	0.215208535962048	1.46325901276323	1.85137754325352	1.48057825132635	2.11055696248453	0.899340310219125	0.685104148082839	0.882398207117139	0.161768912048518	0.355293850478141	0.163309351787865	0.469580582689608	2.08163300518405	0.200551482201451
2008041	19	1.50893472049287	0.276866289375644	0.107587324142376	0.241919185287664	0.933971820245687	0.193359906615984	1.56771854349803	1.95041354991045	1.54405908312502	2.60730860324781	0.915873593503342	0.690027740542527	0.737566383145505	0.265134534762733	0.324764093097871	0.147355607633649	0.443637132138997	2.72386745254927	0.177224600675422
2008041	20	1.47483909713942	0.259960848406607	0.103709321580297	0.232495438175414	0.966376896165158	0.175267094444352	1.68346165147166	2.04176281047426	1.79812284514257	2.92708729550418	0.930050072434381	0.689697555299389	0.514661638839169	0.29669819356736	0.276086278795022	0.133637129132023	0.422995570567958	3.44656821754354	0.158308359369651
2008041	21	1.45150315248076	0.239533663822316	0.0976491810994299	0.227575945022464	1.00366575441536	0.161056100168601	1.88648105136271	2.19583027275656	2.07934905338505	3.47306397298535	0.797907350908978	0.675976501573418	0.347832655904667	0.288935491900852	0.216106694030665	0.120501826781663	0.417526136565126	4.39270873611193	0.143389184153167
2008041	22	1.43900546969139	0.21925836330507	0.0938320499788403	0.234924641853229	1.04141026460028	0.150731300034399	2.16244630009648	2.35603462392355	2.23657038710172	4.2042405912994	0.751436203594958	0.653113594043853	0.362110476086116	0.282578471206769	0.162720009558381	0.109390585433004	0.411341902416877	4.32008821598552	0.131402334720634
2008041	23	1.42633905485392	0.202593679987806	0.0997608486365604	0.226427038772285	1.08326862799268	0.142906921027167	2.48113859595929	2.42848523035191	2.35217170560539	4.78612641695519	0.745247347055731	0.615735756018057	0.420636671567733	0.276544458622927	0.115244771455144	0.100332566133258	0.41835879076093	3.49569804920866	0.122549297817199
2008042	0	1.41675948227116	0.189060254543611	0.11443718470091	0.225567966195402	1.13166371719308	0.140712890245691	2.89488771242249	2.48528036838604	2.42647061112647	5.19112154678223	0.764687548204575	0.568364407272996	0.414368482620924	0.270984466915571	0.0767103834747147	0.0931540650102028	0.422822352017935	2.54297285588657	0.117774952743145
2008042	1	1.41748824293864	0.178347356595898	0.126820793535523	0.22213076768823	1.16384129551638	0.13009894940196	3.36618212342702	2.58780317368571	2.46168374231906	5.72806852470526	0.777263570120617	0.539160644145946	0.424890282760709	0.265224769631254	0.0474751206670872	0.0881498933058967	0.437859633797502	1.71605750283024	0.117991418069146
2008042	2	1.42182972594331	0.169400648627851	0.130216286135719	0.207428591221249	1.19155654108173	0.120531222450433	3.71943194478455	2.8579550356698	2.58424343489141	6.46954146532649	0.781130108464531	0.521079286592479	0.407616320107386	0.260157594847929	0.0287058924658521	0.0848149746426944	0.44999462468185	1.33792512428802	0.12894770836909
2008042	3	1.41508538636528	0.161410083536078	0.127909690638284	0.193559182076392	1.22514512045343	0.113108206006796	3.9105440350084	3.08286577700787	2.71876340262013	7.20691375118056	0.790400113199249	0.503635044138981	0.404234876979678	0.254830434229777	0.0185026468346443	0.0830337166256202	0.451352250954032	1.16015952667207	0.157159972244141
2008042	4	1.40642158875857	0.15421135103532	0.120835359181939	0.186964242058006	1.26730631783927	0.107845694613304	3.97429055385987	3.16811300052231	2.36815201413241	7.70070174042711	0.813869733043916	0.483643797798117	0.386190863757346	0.248566865738413	0.0127531802983865	0.0827519976376324	0.473298805985333	0.978032723391599	0.171548955107253
2008042	5	1.41197651728224	0.148365648915742	0.112188239587455	0.177107241771186	1.3159491753549	0.10398017016615	3.91483365268819	3.22648437209692	1.80935640770107	7.96948212797027	0.841032584179845	0.474818723530282	0.379014471607144	0.24099231786333	0.00942919838784301	0.0834893297891548	0.507338420911281	0.886840220396883	0.183714055043359
2008042	6	1.43836416274343	0.143295881872173	0.103213839839437	0.167778864014929	1.36440086668002	0.101338189897898	3.69532204757408	3.27277155295919	1.45206078567899	8.11801775697287	0.868291406410675	0.475160405061896	0.382072245772626	0.231893519862268	0.0073901442849825	0.0851660944697336	0.546520572789924	0.641148289414676	0.194749361373159
2008042	7	1.42998629240421	0.138059211441897	0.0904511100094056	0.157928414065466	1.44010269477907	0.0956282043102541	3.35319468220712	3.31787859483331	1.31990084567553	8.10003289798537	0.88601136686588	0.479847113682435	0.387071327063855	0.221561642640906	0.00579706523904167	0.0870992578184164	0.572201252628176	0.417055520505962	0.199473713937387
2008042	8	1.37387477356837	0.13225711529249	0.0922269878936854	0.15967105028215	1.57970815138784	0.0894698508448253	2.26860634904664	3.35760682141632	1.27535319168	7.44181925545457	0.852697377762438	0.469483942659468	0.403983372402067	0.21122138517393	0.00339753631949703	0.0872241455779779	0.584869980011323	0.337173019675867	0.219149379894959
2008042	9	1.28707217383119	0.124250446827781	0.0959223958916757	0.185157167017948	1.89184281095939	0.097565790857702	1.77241427916797	3.39885048954269	1.13892089752207	3.40379863568293	0.847847093689982	0.453939613560535	0.429229603436615	0.201693344282271	0.00238390519989108	0.163951742544221	0.591522957841506	0.327566342239191	0.238056182003228
2008042	10	1.20089814339252	0.206547441450706	0.103416918025617	0.249667742101407	2.33133391672303	0.117185952592831	1.26677202051218	3.44449368274395	1.01963058430578	2.42532018298833	0.862983036057431	0.427220342821708	0.466822838484385	0.19364603234569	0.00162704236161482	0.184915109114818	0.602857797961966	0.329871318084472	0.243224785817
2008042	11	1.13217382272682	0.333359579860745	0.108607967300551	0.265202153990429	2.64526091555478	0.135060753736754	0.986510055526549	3.44233265349519	0.722308608573927	1.74649274659939	0.866455248596646	0.392471106444141	0.530791625323607	0.187954393030995	0.000945346320332283	0.177182895602182	0.594747316865905	0.350195029047523	0.327390807354949
2008042	12	1.07753121682146	0.388224775047208	0.117904338202171	0.277590271254752	2.73404945093483	0.168529571563811	0.833802138136652	3.510469120078	0.557871553381492	1.24102688673132	0.850664041080346	0.35460877362035	0.583343263639381	0.184760083161828	0.000576845369673588	0.180771718716964	0.606495294289726	0.388686347639314	0.378627291177383
2008042	13	1.04904292198069	0.380031643378534	0.116147513645859	0.293955957369149	2.74035445501548	0.186039655402463	0.758790383142056	3.64792992517025	0.509914796972694	0.982112392447559	0.834891584478106	0.309617216474491	0.659859538106466	0.182466155697262	0.000390591106696622	0.179480880741247	0.705407322173886	0.426128318542196	0.385258381922136
2008042	14	1.214520254005	0.383603797510495	0.104429868805381	0.309131322723445	2.73919069181094	0.188968980198698	0.71385014245833	3.81443283077607	0.488400379158835	0.885171168640641	0.826554459430941	0.268674266782899	0.729613466717043	0.180841641276508	0.000289898431337033	0.176014099517835	0.799395009887738	0.466196052445688	0.377676470461693
2008042	15	1.89181766162359	0.364452878880779	0.0923747651269529	0.291304140645639	2.7409805862718	0.182176698844949	0.697468112459037	3.94265717804118	0.482641295906775	0.886030981047158	0.803875709540374	0.244820026131742	0.812475853441247	0.182618655324205	0.000220087178206659	0.162144070101579	0.891003114057904	0.502685156241556	0.356801737881266
2008042	16	2.83565706382548	0.31976031801223	0.0799109887784489	0.273109298002687	2.71837540159459	0.170060382591006	0.685332032911584	3.95263082232821	0.484129660475191	0.919869269864796	0.782864776240956	0.225949197254478	0.896811988537211	0.191526267742734	0.000162844339518192	0.14682380237413	1.03341575133447	0.523282864640462	0.33657948316108
2008042	17	3.33670331410206	0.28933548634068	0.0666085486384969	0.24482616727961	2.635159119982	0.156304684534438	0.719839304195752	3.75650991979558	0.481883884417008	0.996684179255151	0.763628300425414	0.210733214941371	1.00116040680196	0.210665464701637	0.000123750486687705	0.129215105855609	1.24053355710166	0.57474025809465	0.308405875734275
2008042	18	3.37475529581651	0.26685090787668	0.0555664082966968	0.220957836011218	2.48816917994711	0.142225455463435	0.80603224978253	3.08672074913753	0.46180771963018	1.06037345457205	0.754907536868806	0.198292578990067	1.14470868202648	0.236590119015344	0.000104127210987329	0.109848103320453	1.39010662302974	0.600042033415121	0.283624312075548
2008042	19	3.34806171342883	0.249471153331255	0.0480968301521138	0.203611840920007	2.29251627969004	0.127865598990403	0.926696999963092	2.41662077349594	0.407563348154775	1.10644126888307	0.760443555349925	0.190298276956658	1.27502506178627	0.263055675973914	0.000104644463332398	0.091955406679215	1.3462335464433	0.64267525164834	0.260629845132649
2008042	20	3.21206561661601	0.235628246898175	0.0431158972053156	0.192597612151392	2.04788055961993	0.114048577674224	1.03574777789171	2.05968278141121	0.333267186438112	1.18852559872327	0.766400685804097	0.181905340330034	1.40265561026759	0.294205567628298	0.000128793420557898	0.078589958958105	1.12053974903163	0.714000363298817	0.239962291844999
2008042	21	2.81807365730542	0.223192264829985	0.0390574831696685	0.188458090401875	1.75352230753074	0.101765234464335	1.13523963249001	1.71711532117446	0.291747037594386	1.34458590950419	0.759349876840473	0.17552037582672	1.43478472303084	0.326318897704514	0.000161318810548161	0.0696353148733345	0.877203345897456	0.850054990135593	0.224987418782492
2008042	22	2.73556611044477	0.209843929798047	0.035790348870412	0.192510016180911	1.39057611122545	0.0914187530725367	1.18564827786167	1.62216182011739	0.306370668736583	1.39356500888069	0.740825474998777	0.171312827106243	1.31069763305998	0.349897715511243	0.000173938323424475	0.063997049693033	0.718882409188554	1.15777401389013	0.214334043895126
2008042	23	2.75328740757045	0.197797963909324	0.033136689775637	0.206009453731051	0.995714615585445	0.0838659141608962	1.28402001140797	1.69067070507405	0.35783178963747	1.34893484300475	0.726413653803262	0.167380781669512	1.15295886554835	0.36774221590582	0.000173849656163612	0.0617255428444428	0.658499180245907	1.5520392072549	0.207259826337037
2008043	0	2.73509022333504	0.189036654392854	0.0313175439204331	0.233565555023541	0.691212505568635	0.0803925767414953	1.3682306682629	1.89969677702771	0.42403243784205	1.29370660393119	0.721708781548481	0.1630690986359	1.04838980699973	0.378982223465917	0.000164878084617077	0.0619866589585749	0.623625774898405	1.86820395514574	0.202744054595948
2008043	1	2.69081948309744	0.183432965188116	0.0303013479847149	0.272920658250311	0.559021933377059	0.0811931810590429	1.40071782736966	2.04608944903509	0.490886411392423	1.23166924523474	0.730240667410614	0.158459472326379	0.961733500320483	0.382778722094758	0.000151346348802086	0.06308288561347	0.60430673119705	1.95902217348055	0.198910826538872
2008043	2	2.62969126079642	0.183101344132134	0.0298711241769249	0.314518824999849	0.505620101418734	0.0843354680148313	1.40781376733121	1.98283431826144	0.566461878604931	1.18297857647252	0.75936785046537	0.153999634192167	0.935483413585112	0.385206801452336	0.000135125654539579	0.0640488004790684	0.582163103041913	2.04972168578368	0.194052308561506
2008043	3	2.52641033444613	0.194122826504959	0.029848147772028	0.356474560722298	0.481982302342184	0.0878011524979679	1.36402850221098	1.67231239280151	0.666940029389113	1.1887806589524	0.801425775070874	0.150084677131742	0.859900882661497	0.389560212042424	0.000114489168691986	0.0641551952419791	0.552345108556636	2.09227020284921	0.190241457789415
2008043	4	2.35494706470735	0.225728603160652	0.0298585275344586	0.410167119341722	0.476655099142874	0.0899426996703445	1.21506657395382	1.39005141258749	0.786988881576291	1.20622317335035	0.83506368490277	0.143284557748134	0.742387932047519	0.39960000998755	8.80652588275459e-05	0.0626992940553074	0.537494263367482	2.03143641878867	0.189064407731683
2008043	5	2.09146824554076	0.290433331733313	0.0297782330673637	0.495145578140752	0.479225134390343	0.0900990408738044	1.07968356267869	1.13865383160534	0.889411175556639	1.23189836061628	0.856053310365867	0.136776729271932	0.627124485277608	0.419835054870034	6.43358503931772e-05	0.058982037440174	0.514336826762601	1.70252389117224	0.188289851123274
2008043	6	1.84162617314003	0.391989154087213	0.0293658788383274	0.670281032310214	0.48155556396214	0.0887336662959086	0.994674598752306	1.02376648146399	0.938031615340982	1.18899581642052	0.845845199595153	0.134313553784715	0.559586458311219	0.448220339864255	4.91991748863765e-05	0.0530890359942831	0.488905194397851	1.40496136397542	0.185596334554504
2008043	7	1.69818521362477	0.510271536237924	0.0287864438681602	0.876846168054045	0.480999669665413	0.0860961279386283	1.24795001213832	0.962625277230391	0.954669498401072	1.13650035817798	0.79056329280492	0.132417504546793	0.516499430569422	0.481140134868281	3.86329079618046e-05	0.04667203001982	0.459248361147102	1.17741031504269	0.183322235066439
2008043	8	1.57747265234383	0.636499505764119	0.0284556028205411	1.0240709590909	0.479615176583489	0.0823040769678341	1.30915514929665	0.894224375205453	0.935726140540539	1.02821070812248	0.765956827413302	0.136161665095421	0.515309931854713	0.515103473280704	3.02965924724343e-05	0.0411374001249687	0.430270228796242	0.947800853180205	0.182261298653949
2008043	9	1.47489693881315	0.721086719184451	0.0462297270057299	1.50996820449035	0.482331722473005	0.0886889151751872	0.889691994461207	0.828656331806872	0.903954794448752	0.999538456663776	0.82693841213271	0.151096550685958	0.514211288141801	0.530896200133868	2.58940675348114e-05	0.0363747009421614	0.403364382686964	0.748711528868028	0.203571938072203
2008043	10	1.45586124522858	0.794346525914509	0.060770783167474	1.42649568579989	0.482351326302199	0.145631867226003	0.77133880005843	0.882638729250494	0.900795570011982	1.08699570344809	0.87538069141832	0.171518779258598	0.415537056077295	1.33092198958534	2.21110694340051e-05	0.0322387846336355	0.380932159384645	0.659723050732065	0.283319659435781
2008043	11	1.49356605735163	1.18456835204744	0.0831094079437314	1.27320923317252	0.481485560261418	0.200134418924508	0.625624411942157	0.995341140230262	1.02097675106041	1.22500655503237	1.09194933464819	0.205406986338401	0.3299549375495	1.05029329464639	2.23466031608139e-05	0.0308206504064495	0.375770649913868	0.701275132832268	0.391021757201913
2008043	12	1.56545713957619	1.82843770786725	0.0953240674143319	1.12993586278578	0.48803921207481	0.209334018071736	0.508638093155249	1.07207212800314	1.20360413937818	1.30817953285844	1.78455074789022	0.249744248330835	0.272025093660555	0.833508582447149	2.75073239527625e-05	0.0324987253136773	0.373557641329317	0.817706777225432	0.53127039077272
2008043	13	1.67859559875671	1.32663657594363	0.0934884276131517	0.98641764526755	0.502658061583405	0.22740109272858	0.441962977718828	1.14958694562221	1.21703150941091	1.3686552172553	2.92919851483747	0.274326350255863	0.245772365644658	0.738378810598048	2.78645780992238e-05	0.0296312425815201	0.363748332384247	0.939267691570655	0.481869944537805
2008043	14	1.83479208294697	1.12516092617932	0.0845986128824609	0.869095076882855	0.51488811443432	0.214779920908736	0.414339935770196	1.22870693393085	1.08646750440587	1.43322043565768	3.36992587990125	0.292784893107114	0.293005648993582	0.667426138043368	2.64745736126505e-05	0.0257469688839703	0.348935782931844	1.00238371493317	0.467466030932655
2008043	15	1.98486527501864	1.01688129429574	0.0760459929849918	0.770067844252348	0.536350059810041	0.205675913166997	0.408648922354696	1.32743011592495	0.944511076432672	1.49180933081136	3.11938843204939	0.342466610806913	0.363269827560005	0.625946259218249	2.36033908066911e-05	0.0217153026969091	0.351387981993152	1.06778912622611	0.419089203924631
2008043	16	2.14160128094823	0.937608843366509	0.0667271286758337	0.670454086222311	0.568824061121807	0.197198732593772	0.413410903477864	1.44292990894843	0.888363306873238	1.58289040586734	2.60499117695472	0.34002022945782	0.465984102630163	0.612761097042502	2.09974629995991e-05	0.0175445011366387	0.37661053345	1.10588240775185	0.377555625591264
2008043	17	2.35409677489525	0.867706369519894	0.0546983446486172	0.579492389838321	0.620434704063457	0.179047739133375	0.430400409091923	1.52322264122373	0.915832759477682	1.79682642403087	1.57303386198213	0.357002690146863	0.558271556655831	0.580185690785791	1.87348635664669e-05	0.0136937119912434	0.420532091907648	1.12395506719226	0.341199152320075
2008043	18	2.55028721282588	0.778936990057049	0.0453125983024567	0.526448112657011	0.688048874323239	0.160923405542523	0.457214635814693	1.42399567698686	0.996911300904315	2.08016848701262	0.84570091664399	0.362916944764264	0.629177796824588	0.536736841910896	1.72865065909688e-05	0.010371523797347	0.454122885290352	1.1642500094321	0.297160776885909
2008043	19	2.64806456355691	0.707501956599337	0.0386327937028107	0.513080126310879	0.770872935531929	0.145461009317004	0.520013600828947	1.42036311156869	1.03813962083941	2.2323754886698	0.572432700063353	0.398142781482033	0.726619157076705	0.503445010456265	2.24533727179819e-05	0.00757856789397565	0.496445915250934	1.20445285905302	0.269855003138112
2008043	20	2.55746703968953	0.644640700985934	0.0337652973456971	0.522908092857941	0.837659229367011	0.132698772196005	0.562118387510659	1.39353508536035	1.00381665279911	2.41813473321605	0.433473866651818	0.411601054093973	0.633108105282792	0.475841222090783	2.3575343687421e-05	0.00542565506305607	0.5160042264851	1.33607516360214	0.273402787507029
2008043	21	2.32597241005065	0.596569121474598	0.0302253709046557	0.537616013800917	0.900329152911004	0.121983364519233	0.604054841741907	1.21232072161703	0.93515020630619	2.63891554442917	0.368888617671945	0.386492689863046	0.520651666070187	0.446417473478296	4.02423419600701e-05	0.00399448239819758	0.516923727988681	1.63221584101484	0.314078546830403
2008043	22	1.97233942065315	0.558998217577339	0.0277612854601442	0.589758214181132	0.930588580233902	0.112961406347995	0.724838719711819	1.04723851555428	1.05010430475264	2.7092780360568	0.35896944175215	0.365606258029484	0.440089456315963	0.409642752745078	0.000180720887703471	0.00320448667282124	0.504199218307872	1.97569752742693	0.378745431745913
2008043	23	1.66076221706437	0.535335375118468	0.0259852946760568	0.606251364025309	0.893317946294467	0.105567163030277	0.922010917503776	1.05413945784889	1.33839852258707	2.68436934318253	0.416661143980992	0.383472120288883	0.394744900569077	0.353892159505999	0.00181722784583781	0.00285976070355084	0.48813664744774	2.25565801368973	0.452151804754182
2008044	0	1.4786740395809	0.514270875315531	0.0246619336351479	0.560812110722509	0.767703049254827	0.0995435796521441	1.08129459963379	1.08070430155471	1.75856326473684	2.5831779332715	0.506493102875978	0.513749059504438	0.358095258387363	0.285000496995553	0.0117877849982391	0.00276637639006592	0.487084088007417	2.43364586919707	0.521469805082048
2008044	1	1.40032960812721	0.492674087104388	0.0237055870408786	0.521683677143599	0.603107259785268	0.0948967825279113	1.1736818931415	1.04548160825788	2.1102539216206	2.5264324777743	0.558240544925619	0.687501451203105	0.330194099045945	0.21624113507083	0.0363871024447297	0.00274877441554232	0.474203624504776	2.50517912959992	0.568281366726
2008044	2	1.41714313846437	0.465514071261451	0.023197614213277	0.492224915454683	0.623505997099548	0.0905752022403346	1.22101353797227	1.10340057397827	2.30646407413365	2.54555755653914	0.57211239970129	0.848135361830676	0.318242353004846	0.167432826193861	0.0721178830168129	0.00274956272771601	0.423634512512403	2.36279579920405	0.590473380570868
2008044	3	1.49238128112351	0.434985525962648	0.0230814117383148	0.468172295855914	0.704151898447802	0.0859943295888622	1.25526840416321	1.21309043767102	2.04034719805387	2.57393879597858	0.560058094582206	0.97626914244307	0.310311075274416	0.142293373190396	0.105707482727386	0.00285723986505751	0.388883658132645	2.24391928096247	0.598671423620477
2008044	4	1.66932645209311	0.411068432982998	0.0233114567962401	0.44669446087812	0.77676997125074	0.0819392430042416	1.29534141240251	1.2394034960131	1.8076907572787	2.63173461841279	0.519226005469188	0.630764795720777	0.350047743208398	0.139206874402223	0.133162414934236	0.00320373246221288	0.367055539523439	2.2262030078531	0.589804863661976
2008044	5	1.89796418261126	0.387955308052809	0.0238157803825218	0.433782629717627	0.816957398992333	0.0782794123255263	1.26748036181969	1.350565505905	1.80404891213755	2.73699499564673	0.383414677517553	0.252695194945988	0.392948588471835	0.149420793721244	0.190913615130206	0.00386196024275728	0.400189616067335	2.22946010526493	0.56537711499316
2008044	6	2.02415296178699	0.361699591134214	0.0244192009808137	0.421973177890434	0.849340061267691	0.0748817336922006	1.32946558329956	1.70444086002207	1.98227242752709	2.81573941910315	0.286929619638858	0.166216866584641	0.412073748759988	0.166680620173827	0.246309551963902	0.0049090597353155	0.400275164828066	2.20427225327916	0.53659983808133
2008044	7	1.90361082038946	0.333621579262163	0.0248765907156034	0.402002931855586	0.885234597274939	0.0716857395357903	1.46399335382469	1.99647089506631	2.09341713141134	2.76796214403926	0.291141349457649	0.182450121161806	0.394631202927604	0.185996772621937	0.258840791569952	0.00647174790475979	0.35825937022788	2.199309938678	0.509160346688495
2008044	8	1.50785556748077	0.378562127251785	0.0250898435467959	0.541877315286923	0.920059376479514	0.0683672831961479	1.63778617925568	2.05055204584116	2.04166839454588	2.58107296119108	0.421546400028909	0.167511903313697	0.420991653155524	0.204432943213756	0.278187620042027	0.00874400222598048	0.288522781507617	2.47204542884527	0.48610381761233
2008044	9	1.18975081461362	0.592143593619715	0.0341119753682232	0.828275557292935	0.908209757104066	0.0932488725673856	1.91188083468953	2.09789518919608	1.89906387932791	1.93373486677613	0.480330319632199	0.13494580469735	0.457621344977156	0.216795540843484	0.287864348456099	0.0111092760787242	0.315350455685743	2.73004073612451	0.488823948410724
2008044	10	1.10558512117237	0.703416771275975	0.0367457794889087	0.615006829190295	0.986239566705723	0.108918188963554	2.09803312528808	2.17907936213961	1.70673814290269	1.83773837667914	0.590316577243998	0.0846964602261364	0.488687762792785	0.222431634864029	0.289840218737152	0.0132037400286212	0.446405158234109	2.88658624583363	0.668640474725718
2008044	11	1.1539400747429	0.612635708519156	0.0426562613975308	0.500414914378302	1.31412054691003	0.115764104973005	2.01540560237342	2.14259783752022	1.61580581796309	2.22443924963707	0.904127379580609	0.0839314425021138	0.70060358748019	0.225363177327668	0.266835440834222	0.0241555997272852	0.605655606218184	2.56458099379161	0.732451828963153
2008044	12	1.2996088457714	0.552337992046212	0.0481437648164584	0.439006803380573	1.56836683944229	0.111360494418771	1.85199786977563	2.09321398210127	1.66197675091054	2.6252769435914	1.0796321365116	0.127499448905119	1.08480838808747	0.229068546038161	0.239261674803275	0.0250784976299581	0.76184859766022	2.00288004011454	0.720218462407162
2008044	13	1.42850721745667	0.494083692686333	0.0481310284073075	0.408463638472002	1.69648860214684	0.11419789568375	1.77081591345409	1.91370047023953	1.93756357432858	2.63050945217208	1.38124986140246	0.219207970125456	1.0778370420518	0.261214725748176	0.210572362524171	0.0248108560868875	0.882561784195035	1.36378289757929	0.654014373683926
2008044	14	1.45291432100396	0.442541684268573	0.047885202701106	0.379306055314046	1.75784843510466	0.134367333112202	1.70968576621626	1.73969182682993	2.05595466065937	2.46735225948668	2.23457243049004	0.443840996225696	0.965739048977389	0.266887342733539	0.187493642494179	0.0240915115674976	0.93932771008071	0.944960028879358	0.544443955589605
2008044	15	1.47900045458182	0.407513014700417	0.0463314188740297	0.352871674139721	1.70743029785765	0.166472597176268	1.8311299324828	1.7215626510806	1.94306608406332	2.48747948988926	2.90993264106924	0.490909799984024	0.785412496571854	0.276453982562999	0.16681517195415	0.018345978771285	1.05258866410073	0.793962459017556	0.487742309534585
2008044	16	1.58348673769574	0.388161206742989	0.0426150276259182	0.33968597073311	1.61820213307224	0.209903551789041	2.01919746623792	1.84708879002127	1.49719638360947	2.5822767990785	2.52446343133781	0.725712386006378	0.589872416061827	0.283061765839787	0.147175382636449	0.0106711290359577	1.10346306354649	0.738353922403894	0.455350031808589
2008044	17	1.93118205672238	0.390552104147839	0.037772333335977	0.346042100496758	1.5700237698521	0.26243101168225	1.98791145256312	1.99016281424356	0.898493958292821	3.59795746207353	2.74367357226245	0.711828735328378	0.48591367229601	0.282334525684308	0.128513402585168	0.00580559730151492	0.915416230747874	0.685718266161571	0.418984917408856
2008044	18	2.30554096816318	0.378539196039928	0.0340892658399621	0.309512842162908	1.58007169406381	0.291820116810966	2.12609961195776	2.09551711866794	0.491226529232499	5.17757242249375	3.0739199211889	0.529707976143714	0.439292383202122	0.280573141928998	0.114747000708376	0.00682921030813656	0.56777345161996	0.597571314173265	0.376235218893027
2008044	19	2.41932514545568	0.374951089760734	0.0314233676369796	0.286174307882791	1.48616578972231	0.301982189436196	2.51768968899531	2.28066370311923	0.334818133501079	6.76613629615562	3.31570713833754	0.60888850336117	0.518540676716748	0.258669989599884	0.100073561505651	0.00907075734866012	0.387880668072047	0.505738906363854	0.347173505778884
2008044	20	2.39491525695635	0.374618327760286	0.0293160783977498	0.27221274165485	1.28556445651496	0.30539051040138	3.04392952127117	2.6427754625542	0.37128486841074	8.09144242439756	3.28736958182273	0.699546900139217	1.1841761494905	0.224118584131567	0.0830588235940609	0.0104282090474944	0.386366940803618	0.402811241915733	0.328946887656319
2008044	21	2.40902421963564	0.371775262628537	0.0274623635930328	0.270276758446047	0.96888433268869	0.277546294479135	3.52609349264582	2.933664387637	0.383466965089894	8.18191103023871	3.26778014111236	0.656967431453701	2.0256944786185	0.205070206981968	0.0707854521010857	0.0125822049657586	0.495762203003187	0.331207918349128	0.319764232326604
2008044	22	2.42913258477172	0.374200934590965	0.0257888265541869	0.29104382773467	0.724524244503075	0.254402214739982	3.54363730491798	2.93433215093909	0.341502923263449	6.6349350035579	3.43993520140478	0.649697308829641	1.7443724858112	0.20250035218764	0.0573729886251188	0.020991684830107	0.693294519793831	0.312531530702285	0.317333565642158
2008044	23	2.62615176478625	0.395487304822365	0.0242542821681606	0.348530222795024	0.536327587839154	0.247126271150469	3.01758166690828	2.66759043160579	0.336999734608548	6.85378814715135	3.79114865306354	0.853540713257431	0.982783894941283	0.206697871024897	0.0528247162251909	0.0596360562063433	0.842421891321064	0.325637146234667	0.320048575018508
2008045	0	2.93512629192964	0.441040364660103	0.0230196067898864	0.440147336564099	0.412211089758803	0.242000945424356	2.25364889440374	1.82833545328986	0.360986410049962	7.22793159308958	3.90343338087591	0.878826860600728	0.610525826597402	0.20957034453152	0.0545636249771168	0.148853053905132	1.00379570269332	0.30918098379615	0.326494377200344
2008045	1	3.11126878848433	0.498993625293924	0.0223430784295747	0.596239916142029	0.387090874470035	0.235641443245967	1.57123216296672	1.12732081262733	0.39079125854846	7.06782989276272	4.00671918182596	0.756261590281834	0.525798668805972	0.207318861808776	0.0557536298825217	0.213383218961588	1.35135793665536	0.274533279752152	0.334580714802569
2008045	2	2.99032539410887	0.551048645171681	0.0221718735481863	0.863295317054254	0.40040866631037	0.232060544358822	1.13092244383818	0.677180855876944	0.414588913251582	6.52561909198807	5.14066197933956	0.673553205684539	0.577483862331361	0.202031615853587	0.0535272484010416	0.271945296247294	1.79702803849649	0.274314736397871	0.337324127944012
2008045	3	2.95198092427824	0.572224280656546	0.0224734083271482	0.906309223988515	0.475390229332014	0.228572029796697	0.748752810723106	0.543464646767292	0.419137224392504	5.7486659410176	5.57213864741611	0.635098989782755	0.671754872234528	0.196940160394461	0.0440279410196957	0.294763448509338	1.8709721226648	0.294589832359665	0.334947518848352
2008045	4	3.00190112511337	0.584945582166141	0.0231147204873262	0.917204224237078	0.584069334919888	0.222666022376424	0.590166878600782	0.540278656188566	0.423527417221416	4.72235452814374	5.22852557454774	0.641746758354199	0.620367295853946	0.191682829414798	0.0543995715604451	0.302980273195387	1.61947314475213	0.305453069430088	0.332208597167102
2008045	5	3.06820347140002	0.588087047871677	0.0237930354012876	0.851101480908622	0.627293416423537	0.217258823429027	0.487028781089503	0.554354791559837	0.424901232049224	3.64493459155242	4.77715689385414	0.650692243533706	0.549825571248336	0.186224930307594	0.113757197965445	0.298991810474599	1.10850077896977	0.332750804682792	0.340292830655376
2008045	6	2.95970521751143	0.577260854632137	0.024299620661744	0.563146503445432	0.637624640299268	0.214424696474242	0.44374061858223	0.584991996364197	0.425261445615432	2.47216136571357	4.42984402792346	0.648752779383723	0.522882014547733	0.1805199800723	0.171229765603941	0.285284892832955	0.930576435843868	0.358161527152067	0.380644945186488
2008045	7	2.67914173168665	0.591099769672574	0.0246959460887099	0.346629766143288	0.64991762852822	0.282648378626963	0.434402406451876	0.626089406429017	0.437888527549874	1.26124874800593	3.88889045415884	0.5591907522782	0.524522165707833	0.174576826942505	0.214699627822673	0.266584909279945	0.991672119298576	0.401923056228525	0.448512532523511
2008045	8	1.81706061631676	0.660140152682583	0.025160706023408	0.233370076614953	0.653454128046411	0.269775549632136	0.448653283569261	0.674961820458859	0.463743689216361	0.677945763564453	3.50074625548243	0.452867760989295	0.54537341465208	0.169771022750831	0.28309356621435	0.250602336569774	1.0603867357737	0.461153828340546	0.513257234025695
2008045	9	1.05624672125539	1.098834984734	0.0255066810545188	0.157975530188952	0.67010708359472	0.245479901690818	0.472689227664629	0.71407754100873	0.486438410875461	0.538852987059466	3.30598373068814	0.421820946657283	0.573459084852036	0.168257201652618	0.280445440782524	0.238699674856542	1.06364515710609	0.562552054777767	0.559370751457832
2008045	10	0.792578552884781	1.10554303672363	0.0250496509751577	0.136654061083985	0.688413248768486	0.214708587529399	0.49108016093111	0.726766452915383	0.528099689662137	0.480983477561888	3.2601526713033	0.435780442172917	0.588999105393501	0.164579814988843	0.249313258873356	0.23113959733499	1.02890874479355	0.6806533799356	0.598666302535758
2008045	11	0.717975421326064	0.779169052661365	0.067002451353234	0.185494413954108	0.708306382082909	0.209489286052875	0.493602289433529	0.721984041638718	0.591803010252731	0.440578940439148	3.33766676448436	0.450661214109804	0.598070634156315	0.160444962716036	0.228262947129246	0.232103048986237	0.967019597407513	0.77252649314898	0.636092492387884
2008045	12	0.711120066854018	0.541837833348415	0.0921998409070904	0.226197350516666	0.721677176285631	0.341229779220165	0.499728458336785	0.711198277159599	0.657800107212031	0.403578645059263	3.4656675859906	0.46816318654244	0.599284933578299	0.158031120759451	0.287698618065146	0.222188049916826	0.908321989997098	0.846403989629106	0.659312957025357
2008045	13	0.683902129814735	0.441825318113904	0.084574387303936	0.228392207891108	0.707281064597147	0.378605035293491	0.450082127044905	0.700501797008302	0.717618777751611	0.37648099252503	3.5597076858187	0.477461506496149	0.542566831469366	0.257531444994255	0.329588376794406	0.200141964545141	0.951518712192342	0.980585047400644	1.24300639031376
2008045	14	0.641591133621832	0.405260539848289	0.0773511757193433	0.230039929245733	0.676206633995838	0.413539901272665	0.419744874144984	0.696536857084312	0.795257965556264	0.358857668610432	3.61405690242228	0.397338540651544	0.45732342151306	0.274432056795076	0.310769031781548	0.180024177646809	1.02965265008496	1.11664826916734	1.59352305381115
2008045	15	0.629546797732087	0.36451612270738	0.0697788789988498	0.24040123394714	0.629494140227177	0.462230482974215	0.398122134354578	0.70413368497877	0.969822901063586	0.350214511213173	3.57282958339418	0.319551526481398	0.375495524189827	0.264791392333065	0.281500257996661	0.163032292191142	1.36568865202144	1.03821853973442	1.59093487867277
2008045	16	0.652769300440309	0.326735034253714	0.0602904610558175	0.255928315446764	0.520160731312152	0.400944942988443	0.378402493069554	0.698551774282987	1.02330399151906	0.36056793862481	3.37408584435849	0.553885669613458	0.400193770532842	0.254177356883199	0.2795764753918	0.14329971218258	2.05928460187562	0.907785825957712	1.48416567163979
2008045	17	0.682737110148284	0.276372254630798	0.0503549066076217	0.26893488585918	0.406461774405004	0.277925759443594	0.385662967563324	0.672699924283478	0.960236010314041	0.384382079443061	3.26137950784058	0.525652510955996	0.511071715063847	0.254625385360769	0.268585853448889	0.120669402733473	2.12161082240915	0.877262000514114	1.29463332863339
2008045	18	0.711677279920121	0.195674122914815	0.0434587462271075	0.269607563158877	0.357763513147312	0.169223187918711	0.43175807166214	0.647619996668582	0.984378208799127	0.413148200942826	3.21389637635192	0.34904140992749	0.640658250149181	0.314665907302447	0.267696562663384	0.0929645166523104	1.84783888510903	0.903478537649418	1.14038192099196
2008045	19	0.734649949592852	0.114853171379004	0.0386203619703921	0.24199563030715	0.338098634103282	0.103338398928283	0.475538322220287	0.647580931348898	1.10654526514567	0.453249730701491	3.0676664709586	0.23437159781235	0.779698674154904	0.58298054457575	0.34030485316505	0.111206185916603	1.53622842964474	0.907677588038174	1.02185669927873
2008045	20	0.764194915562563	0.0975845904544603	0.0351274554833758	0.208135244771367	0.327856561491582	0.0893867632416333	0.565847805871669	0.656363352016775	1.19947005516465	0.510098190913006	2.40069435212869	0.180163530371564	0.836841850335896	1.28369989007547	0.450660582446824	0.119639458493686	1.4084843187446	0.899665450484906	0.950781481005137
2008045	21	0.766621530787134	0.110106863058184	0.0322018000861747	0.186231356856896	0.336168213779742	0.098766451736252	0.696846955643646	0.651924430212104	1.18399141206373	0.608456526149368	1.76797782780219	0.158232650944142	0.910643414930482	1.54513185842912	0.540872631336304	0.118888083975781	1.27017187036796	0.850550966771477	0.921256939634348
2008045	22	0.744346083432332	0.124648467994747	0.0296329952059552	0.169737269029362	0.383125602898415	0.113565937084743	0.802647487669773	0.630551888099365	1.07336094143093	0.763481850372897	1.23809512367329	0.163876261202552	0.879071443410324	1.49573445626344	0.6594770175543	0.127227273553504	1.21091552959135	0.911572262803298	0.923515949300193
2008045	23	0.690520742544101	0.137227752449742	0.0277471016051408	0.168526270095806	0.447475246744656	0.122861872407888	0.839420385387537	0.607185724030031	0.943501702257922	0.886798189440786	0.976966809198841	0.186021333063607	0.795188416745456	1.43699401517455	0.803311588980937	0.133677781338285	1.2591695152333	1.07353894181991	0.958309848274305
2008046	0	0.703152664284921	0.155992997687016	0.0267803295978625	0.182887318703843	0.693324891425608	0.131380912809794	0.858539459082087	0.622908926690667	1.0139570867602	0.92232127114021	0.848990348418168	0.197873029525089	0.642398792533845	1.39582220454807	0.833556015711302	0.12820673755798	1.36857210093594	1.00553119793809	1.18487479894533
2008046	1	0.742480964598032	0.157269964392052	0.0265111728033139	0.201305315858021	1.10419836325263	0.122936507545824	0.811072918134869	0.710758380279702	1.09295762570348	0.922117126704609	0.894046088445902	0.211506338124546	0.536357523056356	1.3569365088596	0.855691683571664	0.121719801284392	1.60728122306557	0.878680257956737	1.42528793218967
2008046	2	0.787215375939751	0.148722407544347	0.0264441450634641	0.271356152919032	1.17065773391655	0.10746347186028	0.745834620297885	1.01949082322203	1.11667885431403	0.922156216519993	1.09642965870319	0.206283561321503	0.437642191066501	1.32876991458641	0.791059017236356	0.105198334673478	1.80533570096273	0.761082090602928	1.33623984799512
2008046	3	0.811532694718334	0.148097467107421	0.0262110327272878	0.283347801484169	1.02823945947048	0.109786038918612	0.792324632072999	1.27343342634261	1.01281964752387	0.982359645742226	1.11174401269126	0.171781508489457	0.375607959596161	1.30819489672166	0.669704992908948	0.0852097045163931	2.0816182562086	0.660003887787362	1.0485565233314
2008046	4	0.8393077000128	0.17484035167855	0.0255339698444639	0.359897156060863	0.86888543513914	0.132569318066795	0.852098021335701	1.31414837559703	0.91729864343581	1.03556315344122	0.789438838436953	0.138117835584806	0.364295631225787	1.30098433872883	0.607265335020974	0.0887476730261561	2.17757962951721	0.652458855733979	0.651626424236214
2008046	5	0.918708002369301	0.195134075163823	0.0245094568079219	0.517358690031036	0.859648492730231	0.193362832787854	1.10433103975401	1.04082914630549	0.90408941954077	1.20269922144253	0.558897150949193	0.127108705021972	0.379412963089296	1.30284083181125	0.660002254487963	0.186133040729018	2.2561292301604	0.847428145276507	0.433582959540303
2008046	6	1.09937569602896	0.214696067061575	0.0233016564958883	0.528312613919619	0.921116571117779	0.21312741324879	1.42350296054076	0.869811307229201	1.00058394809679	1.50496741808059	0.563469852369784	0.125071873095482	0.383166442354371	1.31356570419045	0.865788806632904	0.340444217177226	2.24514454945038	0.966329551593959	0.308669827780473
2008046	7	1.24891323132559	0.263015769876845	0.0219117486881175	0.432979303038789	0.940126234684542	0.187054210097574	1.6718735713989	0.825401751584134	1.17489626494814	2.05830570528027	0.610600905520766	0.128088071504755	0.423217880758394	1.32703550769453	0.864673462023847	0.348950272861857	2.10402823241587	1.06841465632477	0.272820214757604
2008046	8	1.28944760025288	0.331497609771889	0.0250241291731989	0.426219581604184	1.01060238142514	0.190930289379202	1.75568264360849	0.806532508424321	1.3404447880366	2.50019178411222	0.676021403646608	0.122030601535005	0.492126888131003	1.35634033968252	0.783155302065731	0.385051246113129	1.9304242594169	1.15966148046887	0.273965922718407
2008046	9	1.2457122519338	0.450909428475861	0.0334973324795967	0.542099668127041	1.08363635523125	0.328921808120307	1.53176156561486	0.7921187368557	1.50574339221235	2.41791032233568	0.705577671212206	0.117943161584839	0.663423317020755	1.37626171192253	0.73578411209218	0.509245011192359	1.78252684063866	1.28089552877815	0.250367656663637
2008046	10	1.17674191964033	0.527135813978157	0.0496984952137263	0.563212852595939	1.15773603877044	0.521865524121295	1.15661319806321	0.839828121187639	1.67116581178356	2.16142715731241	0.714495060037672	0.116155308487655	1.01782468811207	1.34690057480673	0.463270098070069	0.497627177134349	1.68749457888245	1.49624690333879	0.197511195389963
2008046	11	1.0965728618848	0.512998579912366	0.109679528763063	0.491383165796745	1.20546901217356	0.535465288433155	0.986214855453097	0.930510452795552	1.77885286829529	1.85229283500087	0.724199444902087	0.127464442443908	1.17311460058612	1.23786566246754	0.504150181241718	0.378603213837759	1.68540691508703	2.06383988745858	0.113970056183167
2008046	12	1.03150583360902	0.466537836892789	0.168277170221845	0.414347149389983	1.26892772989174	0.456739043713268	0.970845538343368	1.0135261420138	1.87464544950097	1.68828034064492	0.700124520488525	0.146265295175993	1.04575555316518	1.86411558850951	0.201107371132126	0.292531364421946	1.75423496977875	2.25086768797689	0.0967369774258044
2008046	13	0.991915834819536	0.413282821448581	0.244648218142029	0.363791293087508	1.35763185079852	0.372180411235053	1.0201730808839	1.01386648011341	2.02825177110109	1.59354136161037	0.691620929069326	0.150352643520379	0.829654488474503	2.05472038150106	0.180762409039182	0.331257366022877	2.11686739747284	2.22989386291276	0.0988679956249633
2008046	14	0.959023779012413	0.339620159219582	0.238030788739495	0.346217694701951	1.36360692994868	0.306162259914994	0.961767883759082	1.05031546660362	2.11060198514651	1.52442018932977	0.744495561910014	0.157074496890589	0.690732841500468	1.89347532145766	0.178203246918949	0.449652451758109	2.36650433649627	1.99808299665757	0.0916789647732842
2008046	15	0.988992791034545	0.289343441419622	0.160416678153205	0.349775970630731	1.27826471606087	0.262146928212878	0.904407504746789	1.14206625221721	1.98926796692678	1.48286126163039	0.850782632269103	0.116430366263647	0.626614013228066	1.58467750608654	0.164452492970615	0.484268111415826	2.21174033643017	1.79575631556877	0.0828035857921136
2008046	16	0.968604927449795	0.249913171588092	0.106542922498502	0.343518902479671	1.15064487916828	0.219839535276989	0.772415732019026	1.21426579841082	1.7265922702047	1.47273614194129	0.948050152574963	0.111732577528608	0.585806415837208	1.38521222262934	0.192812734945372	0.402442952620974	1.86049797601439	1.6264937562453	0.0829797428183407
2008046	17	0.916204427374896	0.221701476800001	0.085225032879847	0.358938849151648	0.925579323273295	0.177636592294236	0.654698733538588	1.27365517474956	1.4073764229619	1.98507234650819	1.10186782225767	0.128176227001592	0.566523208457676	1.2473066147443	0.183655208575562	0.295289228880447	1.6789928226049	1.41701404591999	0.0926462489273981
2008046	18	0.837848558696885	0.199047036991926	0.0724900917548905	0.422627455756936	0.698927352105943	0.142342795728081	0.722250827840313	1.2737348934364	1.10030355839992	3.4486728002166	1.29270149578268	0.0852128770132812	0.559351057556402	1.14324779618017	0.164709647405304	0.228800986030535	1.42948182916509	1.29599138325014	0.1047922934402
2008046	19	0.797039517801002	0.192640167847972	0.063560581822115	0.456536847720075	0.543390210399871	0.127546894888239	0.862095617705492	1.26737040299615	0.932891037467824	4.3686952072888	1.41614729064847	0.0792522926088195	0.55384910993783	1.06116792718763	0.153809797109515	0.21190355277763	1.26551473048997	1.3636489795809	0.117138693651152
2008046	20	0.789149159315815	0.204804783563556	0.0599608107888993	0.502203953376799	0.436408599870965	0.122875008211514	1.07566790582005	1.16128366101744	0.948716377774658	4.82866839917769	1.44149260872689	0.0853294373457064	0.541838821283493	0.992473808449073	0.206224409256954	0.234601052977103	1.15353950169411	1.41856229156649	0.136003808542866
2008046	21	0.818011982205838	0.232006628636873	0.057814438186407	0.496780465980229	0.375106457552113	0.158594060307819	1.31499167606632	0.952843204648447	0.954182248597254	4.64688347752403	1.42315233654649	0.0935912642210695	0.530768027578373	0.929594235650867	0.225375582523957	0.208955510803368	1.13611538381707	1.4087185522588	0.161989200343502
2008046	22	0.912924768406623	0.254690529918154	0.0537685478931588	0.539169941651753	0.350975254704838	0.209956695763333	1.48609732908428	0.747563200703588	0.889754065655235	3.29153950697419	1.42056920884373	0.0866483452704059	0.528864750015946	0.868272400957299	0.0962441723162332	0.164871958123617	1.16932022551627	1.38190272951663	0.170995898262318
2008046	23	1.0470846880321	0.263249560257317	0.0454329674748653	0.583430408400337	0.361361886904838	0.256784712992247	1.52315285102296	0.596489691682664	0.898103594795348	2.86150966646658	1.4090757785194	0.0895763257101206	0.538876042026978	0.802044183737459	0.0839999860361031	0.204835919745682	1.26614227093551	1.3786810754086	0.165844364635462
2008047	0	1.18888742173007	0.263982274688262	0.038554048390767	0.45167295217554	0.438922706988665	0.272291088190066	1.64207772226294	0.532610233742596	0.952990709343758	2.63304488095747	1.4396324954107	0.0995938068344571	0.563416700537302	0.743565999917744	0.095484012230818	0.387301619272284	1.3354111498804	1.38934207677435	0.159690212466299
2008047	1	1.3157766261321	0.275910654697463	0.0357919716287582	0.282913888430002	0.625991619581124	0.257293794833189	1.87840641865446	0.536612162747579	1.0225933041774	2.39385658895323	1.41291698024383	0.113186204195686	0.596333984387054	0.704379497289928	0.096160021011725	0.443573209046148	1.33218175416866	1.37771532443992	0.149118979246469
2008047	2	1.41501752795781	0.300842003824817	0.0370091487486339	0.21496721748566	0.803757924365364	0.310590909836068	2.1350091428039	0.553908972936243	1.00757015696819	2.14880214411102	1.38150891647223	0.101860510060298	0.625388492706298	0.688281769976834	0.0880189449156074	0.460996148129995	1.32346368879298	1.38511753811275	0.137537750192408
2008047	3	1.49775793545416	0.341195122513411	0.0401143039712452	0.194460100658032	0.858781575299828	0.391087231821623	2.13393124783419	0.569701324208317	0.991994231445026	1.57407720842605	1.40819511276788	0.0856366310511442	0.659276903851293	0.683679993123184	0.125101005757995	0.423488137398035	1.34368997373211	1.42690890844047	0.128709352310283
2008047	4	1.56753264752974	0.37258806436411	0.0427028222755716	0.205105064333282	0.837507813101359	0.417360775081099	1.88408106819061	0.58758306521091	1.08294983375936	1.3020649142764	1.39468448429303	0.0939120123912398	0.714446375028365	0.701259767666441	0.182484094375452	0.406129380020265	1.34706051769344	1.5302834627564	0.121709888740305
2008047	5	1.62326687176318	0.412498332201585	0.0461054601973586	0.217008475023036	0.741839120765892	0.417842016120658	1.59012819223706	0.618195139854276	1.21962177111192	1.19873753915016	1.35102665935054	0.106028909384927	0.841535274322001	0.761107678836529	0.14689010211972	0.371343673443676	1.31956821473107	1.58931811191564	0.116906258993443
2008047	6	1.68757392018625	0.434249253791034	0.0524235468103844	0.225579846279226	0.582747612535925	0.401097126442381	1.40336230226216	0.662598769871192	1.21764434718392	1.17028260997399	1.27643944721591	0.0988600769499421	0.926853139859919	0.800555348552315	0.128488127746578	0.304896745608965	1.27259404373547	1.67125552185733	0.112581161977305
2008047	7	1.75504338735237	0.426928917891764	0.0593162125657402	0.230436677306488	0.451059517769125	0.35955436683231	1.22221384849455	0.718370779055859	1.23076340764468	1.18447168005483	1.14908514694338	0.100976329047396	0.930777008298026	0.802054077084724	0.154500174507399	0.263462713873336	1.22867479257735	1.76671973887244	0.10856290874219
2008047	8	1.81287959532927	0.403238800970284	0.0665246897172292	0.256173105326749	0.381132003976017	0.315536826760322	1.20539317595406	0.815088783751328	1.26944746553347	1.21380664271128	0.950703628322848	0.120984664034741	0.91240535968657	0.785735885630119	0.268602407423868	0.318809486347255	1.18720346473922	1.86537032489765	0.105996761771887
2008047	9	1.85852111382822	0.441352048936417	0.0671482847258187	0.233214332622411	0.364693586520041	0.302817449037513	1.27070862853494	0.93873527114265	1.33246371725845	1.26995086713288	0.681992973428081	0.137074149011751	0.862941500389598	0.767481938521416	0.528766075515141	0.389653791035911	1.14705441198182	1.96352178180474	0.108725194814701
2008047	10	1.90854826595203	0.476221789838651	0.0626138900829359	0.279303633619406	0.34782908324129	0.322302485546151	1.20202117893199	1.13538287925967	1.45744988343046	1.25076719849741	0.548973267984203	0.142633272702089	0.764928035174389	0.753275708409622	0.740377574070811	0.320192182111505	1.10013100706622	2.04484245951825	0.113960008186599
2008047	11	1.88102396817084	0.453339076904582	0.0561392886724465	0.371912061066365	0.347280455410854	0.376985452801348	1.11772890297175	1.26772251399827	1.6189363332136	1.09240022500978	0.511863968654203	0.208346224854526	0.532873988501641	0.746935422377711	0.605719815655863	0.257049045730005	1.05788033331161	2.08811300308269	0.117820743015983
2008047	12	1.78746146880178	0.446010207684276	0.0490544197915111	0.359224206983925	0.342665870033078	0.377153611533255	1.04805066450805	1.31151727887529	1.682746936154	0.896144919685125	0.620286036678097	0.382866675104459	0.421812890339145	0.766186830035521	0.329763641169484	0.208918553471772	1.02328639273687	2.12050246197554	0.115968224467321
2008047	13	1.66518233661746	0.400374409779034	0.0469372974167198	0.320082915861843	0.340205888883635	0.350671381045856	0.801065106132839	1.31071887270365	1.7265865982048	0.820964969398423	0.899363225985527	0.447521444709305	0.381789243100235	1.0418384261658	0.260309892085675	0.172580027096277	0.985624393826066	2.05864625022522	0.112390574244906
2008047	14	1.43805434715815	0.449522117417858	0.0460234901980887	0.287127101013776	0.346209060894269	0.314239394359929	0.652971764039006	1.2741785878564	1.72898468010742	0.817062840700644	1.19113699492663	0.625842043549881	0.373651220170419	1.07008852354652	0.246738038313222	0.143594622745202	0.937490581147988	1.95886649441387	0.105809922456055
2008047	15	1.13724401562866	0.44418850462592	0.0449760498235211	0.264832318503988	0.392911783407698	0.269936766166847	0.5331353678081	1.18696022737519	1.6309031253365	0.844575794322386	1.27393894707482	0.665590217371608	0.409268419410084	1.08624439225072	0.235448832649022	0.122798254345092	0.879257059731641	1.78343886360908	0.0963007782918473
2008047	16	0.940209314688307	0.411532888102638	0.0428365960366203	0.238657841221942	0.494332348385035	0.228099926605788	0.495874299353494	1.04871868149994	1.41449801648705	0.893975122088722	1.33479838339726	0.723556607765718	0.50226130778324	1.02877920381618	0.202624702769538	0.115307486614911	0.802540755192827	1.70926700192991	0.0875631709857101
2008047	17	0.848109085630103	0.379111480307923	0.0412316153010772	0.220992480062716	0.63949260097249	0.187602844292479	0.543009992923515	0.938402594877808	1.21344138449738	0.924466945988975	1.30176537407439	0.461248992690379	0.627228134526178	0.977438062843866	0.189229286878214	0.0927276084919958	0.698929347325226	1.74886344288402	0.0792716700169391
2008047	18	0.806571436126746	0.331028005047082	0.0423174607482718	0.182956115358989	0.815601683678011	0.161965339977442	0.577353675081197	0.879953542411251	1.21692074008907	0.9349704715111	1.2745622221124	0.273001286665075	0.787753055066552	0.947339052743797	0.178089963195917	0.0996854773235935	0.567694060943305	1.83621192920466	0.0738643706008062
2008047	19	0.786826314682693	0.302215794758133	0.0454433810341297	0.157128923911241	0.923376369749129	0.144265292216575	0.566620795884718	0.848982278800206	1.28718543311024	0.978686926509437	1.01281030240482	0.376666632139458	0.902418445096105	0.922534604749787	0.15006846560058	0.068234357549831	0.49600142295054	1.9231299658695	0.0706509156133307
2008047	20	0.791597363529951	0.296993405268749	0.0501431317790609	0.169107186716016	0.967459899613522	0.127152205424078	0.524364694520578	0.853663011480496	1.3656874081765	1.07684773601657	0.862144200039052	0.462925226101169	0.974357154619208	0.887239704980293	0.134039528431471	0.0608147976897968	0.475078031942164	2.04011628240911	0.0699025448813888
2008047	21	0.787744207075927	0.263278473820912	0.0528164915409232	0.147654543126801	0.987845544694814	0.103406723262127	0.514324542095211	0.885253207110465	1.44224389248886	1.23105708055481	0.912748011820926	0.549567141400257	0.989917810030418	0.838943359076195	0.118424146180011	0.0602920157571664	0.473288981451388	2.32107886317356	0.0705211657554299
2008047	22	0.796580840562269	0.228145011841216	0.0531899734592878	0.139358984209146	0.972737343793368	0.0847177663175705	0.557834482443706	0.904889738009031	1.51816478663875	1.39364590943287	0.984096026582066	0.555410655458882	0.962836588818677	0.766854057391107	0.111377230245523	0.062717359784027	0.479185178993856	2.82990886859057	0.0726401088695891
2008047	23	0.923882382627946	0.196876652418377	0.0531040935695756	0.132575300729156	0.935746243816907	0.0791045215967815	0.620712226094441	0.951749117596397	1.6407813858003	1.5296101797498	0.904311014986674	0.638528230419175	0.940830897544827	0.680367989018954	0.107322926779725	0.0664539143551126	0.490731606022316	3.2466113750743	0.0771029271582892
2008048	0	1.14998370164659	0.161339322600549	0.0527596094479829	0.127002970015607	0.858349041401174	0.0785166384982866	0.52622410528571	0.95226138986721	1.81580421474983	1.70754165865558	0.826317168949948	0.623039118056503	0.987279466364658	0.594660201334526	0.108050364971598	0.0678364768212706	0.546841049949511	3.48449122002702	0.0863591854325938
2008048	1	1.41216355691818	0.14318101106534	0.0522102862915028	0.125149509029655	0.768495765484358	0.0774988906020121	0.713732838806953	0.890893143926685	2.00413629712183	1.88465659809035	0.733510852819697	0.530941746456281	0.948342599078288	0.539775887972618	0.115828384122027	0.0661070537256662	0.676386778907377	3.61129527829574	0.0912292039567685
2008048	2	1.6523229472438	0.129180831773622	0.0516002631689496	0.126943958004278	0.690470464160437	0.0741295724387084	0.922301998976689	0.863456042590091	2.1312484335309	2.0405729106484	0.625718718083556	0.479843459981872	0.793988307540426	0.526987404998493	0.132793041944217	0.0637280823194855	0.849764422053506	3.82516851237883	0.091060665226477
2008048	3	1.85757314010289	0.118920264838519	0.0510451362655422	0.119410099676794	0.628109594109408	0.0705079475043837	1.11984437142128	0.924497149289342	2.32893094034857	2.20166953005681	0.572840961167059	0.475367737060446	0.700645621743377	0.551356454539238	0.160426824833099	0.0637517007889486	1.07787119266064	4.15245192023266	0.0894292002286921
2008048	4	2.05506147681801	0.109167343501379	0.0504204112554531	0.112753642184386	0.584605987481635	0.0682910591210872	1.29549980157114	0.965018856417657	2.62669125607977	2.48048946403736	0.576107287945039	0.41391814507423	0.708319672690507	0.613015906912218	0.195606298620415	0.0614100377932836	1.20996711514776	4.41207669144158	0.0857438816202475
2008048	5	2.30220141863384	0.123984651142732	0.0501981562622947	0.110918037254695	0.638015937297095	0.0663165547843232	1.4587150339791	0.983545848109707	2.94556981024659	2.81819020957396	0.798060990592958	0.334236303782192	0.708411881114512	0.69135757139589	0.212015929879042	0.0581551883984886	1.2684935568153	4.62349791012059	0.0804080373664318
2008048	6	2.51500546308653	0.122623298077734	0.0498606755705345	0.112647001938273	0.69250064019203	0.0674051911710372	1.58468210513311	1.10908916501046	3.32128585871868	3.06417398012329	1.0259946613022	0.283457832274212	0.663309133487772	0.729438007624367	0.20335464611537	0.0605993889997704	1.37149223942864	4.87266698132216	0.0745713564589418
2008048	7	2.63849709021488	0.113820074797229	0.04959536633366	0.117198531923664	0.732835119590256	0.068811362046085	1.45821474514308	1.2696512626593	3.65925864976376	3.24887435719679	0.734600019040606	0.224364103752398	0.745314901057558	0.705224754970444	0.171828204129263	0.0623145722687019	1.39011285566419	4.98859190737753	0.0695810407731682
2008048	8	2.79474699421474	0.0999983922984723	0.0498890559294016	0.132252228386792	0.805189608403714	0.0706860301718977	1.93425260568832	1.45633045539373	3.8808011177721	3.2912105150403	0.705613206881632	0.201289663211899	1.16501273181916	0.625971196067025	0.132682238468978	0.0643584739037693	1.42696570589251	4.76758036744196	0.065638607210085
2008048	9	2.98486869464699	0.0876605710675024	0.0454853959643855	0.135849434112633	0.908583913520833	0.0805882767900207	2.46450826015053	1.62232775774928	3.73038510142173	3.1711556207826	0.745572567056126	0.223620633773663	1.43858771825926	0.547194458953336	0.117643885501536	0.0829641699713483	1.47256730882477	4.49310638119214	0.0632470011716518
2008048	10	3.16156048103613	0.0854657098367297	0.0414234393415738	0.117828962345352	1.02158794864739	0.0852925640718313	2.40949125242101	1.79792811197749	3.75921104121204	2.96895514806829	0.749897996185086	0.214302727198112	1.78358646913347	0.87316364178095	0.125594151834956	0.092520105369435	1.59511289443579	4.3448215961551	0.0608887535724102
2008048	11	3.26129898600315	0.0885159837623111	0.0400330772180431	0.11350680094994	1.17044446864305	0.0941785718128858	2.42313730972358	2.0178110054598	3.73195301487416	3.14570362195806	0.789524609540883	0.162580220873241	2.01661423440029	1.06504224208024	0.121874734814985	0.0731913081810897	1.75187568306614	4.56774682901253	0.0610735700294512
2008048	12	3.33088153575958	0.0831507275565383	0.0413098764860909	0.106420086100668	1.41616862620319	0.0860851696704809	2.54842950775368	2.19001337822044	3.68906857697321	3.21119703301602	0.902871065594508	0.13412656361248	1.42945118848861	1.09021393627128	0.114985923582533	0.0628459792105764	1.91550333283256	5.10418257587221	0.0597120676971967
2008048	13	3.26360848574375	0.0785703994984928	0.0516466822619213	0.0980830287825298	1.67452117194566	0.0789155922456979	2.52329917712058	2.31332899545557	3.72216479503857	3.04600568864923	1.06663128149399	0.122776946907503	1.03705580466957	0.893127618436838	0.108657456218414	0.0549745438458903	2.08987734328858	5.67078323410465	0.0570491148525568
[truncated: 298 more rows]
