# Supplementary material for: A comparison of sea salt emission parameterizations in northwestern Europe using a chemistry transport model setup
Source: Copernicus journal article supplement (doi:10.5194/acp-16-9905-2016), 2016-08-08
Supplement: Supplementary file 2 [file acp-16-9905-2016-supplement.zip › conc/conc.timeseries.values.win2008.ov14.Na.DE0001R.csv]

doy	hour	pm2.5	pm10
2008001	0	0.350514094101166	1.86284522208847
2008001	1	0.339692175290943	1.41275808792339
2008001	2	0.319857711011065	1.06556307916719
2008001	3	0.322777053682167	1.13759986947098
2008001	4	0.3506566549763	1.36945558135109
2008001	5	0.358823888796821	1.37095583299886
2008001	6	0.354553607647039	1.39440532250763
2008001	7	0.35894258558371	1.63801914893165
2008001	8	0.344259750537863	1.84639884811704
2008001	9	0.326301289846131	2.08726846019148
2008001	10	0.320355286776949	2.22150104262638
2008001	11	0.28315227324772	1.70142899098407
2008001	12	0.233500544935589	1.21201427002745
2008001	13	0.20327847089403	0.937185526843533
2008001	14	0.18961657846834	0.746266970674765
2008001	15	0.176117785463563	0.579233653901823
2008001	16	0.162798489470468	0.457422526002822
2008001	17	0.15134581108213	0.395478991401645
2008001	18	0.144546703414464	0.35437741532186
2008001	19	0.13833685397517	0.316315644263891
2008001	20	0.133495983092154	0.28370963733663
2008001	21	0.129089319491918	0.252500368775108
2008001	22	0.123293479865932	0.224251730599849
2008001	23	0.115940009832627	0.202716402324877
2008002	0	0.111455225593983	0.192996991533588
2008002	1	0.107236843366702	0.178230220198383
2008002	2	0.105747647313202	0.172444421039736
2008002	3	0.106996044562432	0.182387665059531
2008002	4	0.116069867430621	0.210605836623728
2008002	5	0.12631110920552	0.255012301189365
2008002	6	0.133911018444015	0.268400547759561
2008002	7	0.125971677045993	0.226487435638222
2008002	8	0.0970235981382337	0.1550239183106
2008002	9	0.0604995101276573	0.10247058238651
2008002	10	0.0337857214240952	0.0601169883948843
2008002	11	0.0404551082160936	0.0889847696878685
2008002	12	0.0832122721079702	0.193310072540524
2008002	13	0.0920417324773882	0.19856003595584
2008002	14	0.0973524433568383	0.250811211346026
2008002	15	0.104743523936158	0.316169748827236
2008002	16	0.125469911781793	0.363745479725479
2008002	17	0.141371709082341	0.284593549098357
2008002	18	0.155494580452343	0.239450943542299
2008002	19	0.155532403564372	0.269263444539079
2008002	20	0.116208027891454	0.31736666460819
2008002	21	0.0493337434673357	0.205329199171633
2008002	22	0.0386948508163544	0.159899156935425
2008002	23	0.0345304837258123	0.153461973019909
2008003	0	0.0347356674818249	0.166397074954823
2008003	1	0.0369029175677342	0.178025107307318
2008003	2	0.0361722655747717	0.170133401821262
2008003	3	0.0272609130587433	0.139258432762869
2008003	4	0.0239296509621315	0.125464417761432
2008003	5	0.0221739295527306	0.121215375421365
2008003	6	0.0235211612191403	0.127203317366894
2008003	7	0.0255892545298594	0.136443749827078
2008003	8	0.027842916415732	0.148401508832456
2008003	9	0.0285257135927684	0.147993477912535
2008003	10	0.029896726476974	0.149714301702321
2008003	11	0.0292107717963274	0.151382866919207
2008003	12	0.0268993111477	0.150135407187776
2008003	13	0.0245177723010006	0.150248297921364
2008003	14	0.0284490756534762	0.177170010695545
2008003	15	0.0321013270609064	0.193886391235682
2008003	16	0.0338322695466075	0.196097055419109
2008003	17	0.038258054562608	0.210024936407197
2008003	18	0.0443830515896335	0.227956432943621
2008003	19	0.0492520023486416	0.239557597092153
2008003	20	0.0523078629667388	0.217777865383981
2008003	21	0.0474706569694514	0.163955017070826
2008003	22	0.0394196667530784	0.131051117776824
2008003	23	0.0348167198387482	0.114896389384464
2008004	0	0.034886301246729	0.111505119109968
2008004	1	0.035102185364236	0.105631432662177
2008004	2	0.0333817820111171	0.0986372794682218
2008004	3	0.0325640335554372	0.0945171953553071
2008004	4	0.032937507742488	0.0935963638285271
2008004	5	0.0333440004766749	0.0926239804385863
2008004	6	0.032689734543759	0.0941191010110269
2008004	7	0.031502778600933	0.0965388257906905
2008004	8	0.031224954066614	0.100640514322688
2008004	9	0.0323571456435809	0.107855945458877
2008004	10	0.0350858852099313	0.115841511513401
2008004	11	0.0361224931699679	0.119366043109891
2008004	12	0.0358480877520422	0.122484357119986
2008004	13	0.0355454864180442	0.122986656975027
2008004	14	0.035313955853769	0.124145738116049
2008004	15	0.0358088092827004	0.130870290671709
2008004	16	0.0384807843077011	0.140009318801266
2008004	17	0.0394878675439127	0.139011735077115
2008004	18	0.0373362392169436	0.133059176165694
2008004	19	0.03344333855987	0.127198669185529
2008004	20	0.031816617050607	0.126437820123979
2008004	21	0.0309624076384166	0.123085452048737
2008004	22	0.0363085882422106	0.138890892727848
2008004	23	0.0391291556755542	0.149351658302417
2008005	0	0.0398641391243045	0.142032814163894
2008005	1	0.0447442098546421	0.158247101626782
2008005	2	0.0491485926553787	0.183819716035123
2008005	3	0.0557113082083538	0.210161122592829
2008005	4	0.0673573723782067	0.267359986233918
2008005	5	0.0718127200583171	0.335760586256481
2008005	6	0.0671864787706093	0.371801219347267
2008005	7	0.0559493713421474	0.354299683079478
2008005	8	0.0493062285976606	0.368834117063714
2008005	9	0.0523739536025755	0.396282945050125
2008005	10	0.052585947203848	0.464445767797637
2008005	11	0.0511266075867026	0.477322677432447
2008005	12	0.0377847414220289	0.440012406552581
2008005	13	0.0305808878814835	0.427859578191769
2008005	14	0.0587518482802624	0.714633548936307
2008005	15	0.0743713955248201	0.950245729837909
2008005	16	0.0777727767738075	0.962469148519262
2008005	17	0.119799817285312	0.959230656974789
2008005	18	0.178247622600139	1.04479263312022
2008005	19	0.214469579992709	1.14161609646067
2008005	20	0.217166762751694	1.25521323428476
2008005	21	0.173299355337472	1.19627897562079
2008005	22	0.187389265431759	1.1427397836966
2008005	23	0.269994091301584	1.37866085373594
2008006	0	0.316605839357358	1.47679363477322
2008006	1	0.337478774675879	1.43923582310314
2008006	2	0.36288676230254	1.49988502498189
2008006	3	0.36102290510005	1.42140731795262
2008006	4	0.234661663682142	0.924890982926002
2008006	5	0.211404465194851	0.93604216055381
2008006	6	0.211925609507494	0.956738341929645
2008006	7	0.161078643069329	0.863731298923477
2008006	8	0.148141470101669	0.851267833488213
2008006	9	0.185854160580725	0.928798006295198
2008006	10	0.246727889831007	1.0855668027263
2008006	11	0.323571023580926	1.30905020072997
2008006	12	0.400046759963012	1.52038333765973
2008006	13	0.44346617072681	1.61819593240258
2008006	14	0.451592134751038	1.60252997177011
2008006	15	0.453384947547552	1.55817067260878
2008006	16	0.448770761391319	1.48330247503226
2008006	17	0.396300456587008	1.36825208713922
2008006	18	0.349126078560766	1.19250430397603
2008006	19	0.293173643972362	0.977080391317551
2008006	20	0.268152361079881	0.861559245835482
2008006	21	0.28130026992106	0.84450797465521
2008006	22	0.321749434278659	0.990911556201704
2008006	23	0.369053185627901	1.28282483714334
2008007	0	0.376925506410133	1.41341038857509
2008007	1	0.372472304701266	1.46429697327004
2008007	2	0.356651618561125	1.45840875057307
2008007	3	0.302791954184628	1.25801067594064
2008007	4	0.225398960576532	1.02212462206411
2008007	5	0.194583924347987	0.911843573779431
2008007	6	0.170368277607634	0.806498354005785
2008007	7	0.136956947145175	0.706440323987906
2008007	8	0.10315529466249	0.602260831631673
2008007	9	0.0748960476499896	0.518992933136667
2008007	10	0.0751687354699379	0.470635753168057
2008007	11	0.0715085671163538	0.424697501300413
2008007	12	0.074324263314887	0.393854880083
2008007	13	0.07237634253074	0.34194171438002
2008007	14	0.0654022411652773	0.300006710927181
2008007	15	0.070476764144412	0.28805671201699
2008007	16	0.0804682067849545	0.308584715407301
2008007	17	0.090535892145228	0.338117891176276
2008007	18	0.111196063335993	0.355366597158537
2008007	19	0.147838758396233	0.489602977395756
2008007	20	0.0612967828600562	0.225929532434902
2008007	21	0.121074788120264	0.500648573031276
2008007	22	0.31460802268745	1.34981448328959
2008007	23	0.304719130309857	1.35608966886702
2008008	0	0.244265217019943	1.21683528121821
2008008	1	0.172711776436234	0.892645207274781
2008008	2	0.14988679915196	0.868074317235803
2008008	3	0.139045334819187	0.823748281699074
2008008	4	0.213257678563891	1.20258077060792
2008008	5	0.359001152344827	1.84340943492794
2008008	6	0.382117340615923	1.87981965897912
2008008	7	0.370759186932948	1.66257511659628
2008008	8	0.253112171953412	1.34742822937688
2008008	9	0.140323872787104	0.850995953445619
2008008	10	0.205468308171405	1.18023900463841
2008008	11	0.289767667355354	1.56854372119576
2008008	12	0.310579670027438	1.59246265690374
2008008	13	0.283741302628798	1.41982088760835
2008008	14	0.211566750841724	1.23865206543206
2008008	15	0.151327457181217	1.28905629699783
2008008	16	0.148530816840378	1.38694723922544
2008008	17	0.174868373065394	1.60573426084556
2008008	18	0.139265075987925	1.43380582215775
2008008	19	0.145135862338758	1.36436212598622
2008008	20	0.212929321299475	1.75547348268736
2008008	21	0.364596668694099	2.24176096578963
2008008	22	0.510263524818309	2.40168681506081
2008008	23	0.539422535200935	2.28459153707985
2008009	0	0.420787657791606	1.78216050315874
2008009	1	0.323081529491466	1.53863753133505
2008009	2	0.325903837693914	1.58862858361143
2008009	3	0.272500624813212	1.38929589091763
2008009	4	0.227481238269324	1.19700373758206
2008009	5	0.223101143209341	1.16787841906501
2008009	6	0.20165160252691	1.25181335593344
2008009	7	0.196836670668619	1.61537838472991
2008009	8	0.124102357010382	1.29208191806484
2008009	9	0.231067251767416	1.57258790008263
2008009	10	0.315472006451592	1.7476109178073
2008009	11	0.337287464421262	1.82086072927799
2008009	12	0.409890523917143	2.1585198976822
2008009	13	0.413535175208781	2.13004887830058
2008009	14	0.411415260920223	2.13064863658474
2008009	15	0.444989826254339	2.27793477595894
2008009	16	0.456894468852719	2.31127364807808
2008009	17	0.433698550188458	2.17151899754814
2008009	18	0.399434541672611	1.94719816707752
2008009	19	0.422706292672642	1.9504975352681
2008009	20	0.431262815703974	1.93251723154993
2008009	21	0.395411762582596	1.7726923866591
2008009	22	0.341132478846194	1.58732693461718
2008009	23	0.302848481164309	1.57693754445629
2008010	0	0.262396574021015	1.46664615950444
2008010	1	0.240119160891493	1.46600690987487
2008010	2	0.279812830301946	1.78940752549305
2008010	3	0.319613104504188	1.97652650585637
2008010	4	0.468158586753197	2.56133276835909
2008010	5	0.454359016376299	2.578914422176
2008010	6	0.448302720172346	2.59587340565143
2008010	7	0.4748334386009	2.72134950041483
2008010	8	0.501509165597193	2.86648355451613
2008010	9	0.502027031670444	2.89849719929322
2008010	10	0.478328065312592	2.85533131281126
2008010	11	0.469950097401693	2.82203616622941
2008010	12	0.472905878711512	2.7154784797083
2008010	13	0.376768859705611	2.27400070540055
2008010	14	0.289808546643614	1.75472623818935
2008010	15	0.222001587159181	1.49851789147733
2008010	16	0.1941629188891	1.4826963746859
2008010	17	0.161665862568021	1.54350061492622
2008010	18	0.161442725555114	1.66209185395257
2008010	19	0.130011810411892	1.54608087804837
2008010	20	0.137820170510384	1.41756541183168
2008010	21	0.185355693265293	1.82418681729863
2008010	22	0.236651004079915	2.4466700122027
2008010	23	0.266609900194467	2.71771525637741
2008011	0	0.300263732639717	3.02500593564981
2008011	1	0.330920540711048	3.22742707237824
2008011	2	0.349472565226186	3.2795599147686
2008011	3	0.318616709488092	3.19254846928943
2008011	4	0.313147873324867	3.08580383559896
2008011	5	0.297131646435627	2.94403313194001
2008011	6	0.246715700056447	2.54450966005103
2008011	7	0.103618446170924	1.19208839679108
2008011	8	0.0672708444841258	0.809335786406216
2008011	9	0.064627090610209	0.647566781930557
2008011	10	0.137887270030799	1.10692891305627
2008011	11	0.180980797267021	1.28522887538363
2008011	12	0.188806932505634	1.26297714091023
2008011	13	0.199215663257869	1.38039483532424
2008011	14	0.209770709263035	1.59121521548315
2008011	15	0.20728302914612	1.74386603800912
2008011	16	0.0749792768176148	0.772249984773022
2008011	17	0.0555627851514198	0.64207329586352
2008011	18	0.114793857017351	1.28812584480466
2008011	19	0.150872065590742	1.65425910460195
2008011	20	0.128423725796857	1.37015616601912
2008011	21	0.120999579802853	1.05500924222021
2008011	22	0.17966778633878	0.873421953809993
2008011	23	0.138551382178369	0.594863709904088
2008012	0	0.124480547121459	0.513551175208055
2008012	1	0.114261845726106	0.438940508693666
2008012	2	0.105887243180292	0.388812968955114
2008012	3	0.0875410834770312	0.310958322155925
2008012	4	0.059221138913338	0.238499822130857
2008012	5	0.0776313391163425	0.325640588214984
2008012	6	0.107684448475989	0.470376332452139
2008012	7	0.104801800075488	0.482020094784953
2008012	8	0.0692132110036302	0.431583689385936
2008012	9	0.0504380646840788	0.391533125380444
2008012	10	0.0429914574955487	0.341584384932283
2008012	11	0.0580404413267674	0.408654838608754
2008012	12	0.110609538156632	0.84267305621893
2008012	13	0.0992880239159436	0.763648630265565
2008012	14	0.122841165725285	0.855016296159215
2008012	15	0.15938907020861	0.846140088063851
2008012	16	0.203332520051213	0.806408557228411
2008012	17	0.308557384784686	1.1818493449249
2008012	18	0.356271964440138	1.30204815118867
2008012	19	0.297911951225102	1.0927999505613
2008012	20	0.23823010392424	0.901640976074112
2008012	21	0.248491280176407	0.967054871035747
2008012	22	0.248995078377288	0.993302492754405
2008012	23	0.242110222682402	1.0246112444187
2008013	0	0.230630784157207	1.0144788402766
2008013	1	0.214406801904304	0.911595844322155
2008013	2	0.223905035615568	0.8508184110669
2008013	3	0.147438000420415	0.553802900809741
2008013	4	0.127501152504225	0.526417143066673
2008013	5	0.15093960436683	0.665572304424171
2008013	6	0.126859472510519	0.581927103180782
2008013	7	0.112460555446774	0.527191400063576
2008013	8	0.112766784665653	0.519213320726589
2008013	9	0.128780492475002	0.576854868424068
2008013	10	0.125489635618874	0.644413946035358
2008013	11	0.12680298197153	0.669270981325409
2008013	12	0.154146724693316	0.752080385245044
2008013	13	0.201203047506877	0.864379858045184
2008013	14	0.243325500277884	0.970227883575385
2008013	15	0.263121798627971	1.03350115724407
2008013	16	0.246127186111435	0.954123316388411
2008013	17	0.217714580540944	0.857007022644114
2008013	18	0.192926509513222	0.783052647657401
2008013	19	0.153422742196071	0.685490010777407
2008013	20	0.132120906805047	0.648828242334863
2008013	21	0.116253625500516	0.579316938000856
2008013	22	0.104753332836024	0.4760724786059
2008013	23	0.103687322540439	0.429357951637633
2008014	0	0.113769839952383	0.440261838506788
2008014	1	0.130981955679833	0.491467095894363
2008014	2	0.134155974334266	0.503165243488236
2008014	3	0.117532662765446	0.46439554592875
2008014	4	0.0978021708973163	0.400703889482565
2008014	5	0.091249529046526	0.384995968803339
2008014	6	0.0930908250556502	0.406108347920866
2008014	7	0.102194216774047	0.446778017182768
2008014	8	0.110085249192054	0.500029248106124
2008014	9	0.127482545581113	0.566146533093995
2008014	10	0.133526452917109	0.610499555588078
2008014	11	0.132252900719484	0.643882501156158
2008014	12	0.128158661250525	0.700573623741421
2008014	13	0.122808069328632	0.748191070074879
2008014	14	0.144063632045342	0.859294417117642
2008014	15	0.132478506603159	0.822020172203005
2008014	16	0.129496579692192	0.814958068232374
2008014	17	0.150456493847431	1.00369213901953
2008014	18	0.142134360799628	1.06942254364677
2008014	19	0.115012807399003	0.996156169549362
2008014	20	0.0988314034394526	0.884248429095598
2008014	21	0.104290805182949	0.898805831440825
2008014	22	0.120561167296126	0.996984897654984
2008014	23	0.158153401593403	1.22001708881282
2008015	0	0.156043538694983	1.2709273525889
2008015	1	0.136557015989212	1.3371354141426
2008015	2	0.118812144460758	1.2011599630408
2008015	3	0.0693556851155933	0.816601831764188
2008015	4	0.0684846583575964	0.67083897421573
2008015	5	0.124779052959008	0.95592928918816
2008015	6	0.163526639882706	1.18274178257838
2008015	7	0.168052518011681	1.17239319106346
2008015	8	0.20040776250261	1.2731899177115
2008015	9	0.203182451843769	1.22013940972881
2008015	10	0.123439445891679	0.733424175579424
2008015	11	0.148297593115098	0.834836909592709
2008015	12	0.152080576026967	0.933711738981558
2008015	13	0.0830204628545073	0.659479661217924
2008015	14	0.0575853299526464	0.47155384990991
2008015	15	0.0635939853804223	0.551720760081778
2008015	16	0.0650564407381103	0.691075634696516
2008015	17	0.063557462490386	0.715771208516129
2008015	18	0.0639460528669956	0.756953764632371
2008015	19	0.0728242378425258	0.868877811401402
2008015	20	0.0795109696345095	0.880766615652141
2008015	21	0.0786322721894359	0.863870427629773
2008015	22	0.0729858214246601	0.786387906922333
2008015	23	0.0586514382784032	0.653751549841721
2008016	0	0.0481474607059279	0.609066210660813
2008016	1	0.0547115077111207	0.661323483316022
2008016	2	0.0916920284163605	1.02786162121836
2008016	3	0.101815727289566	1.15215953182231
2008016	4	0.101504536122287	1.03818239856997
2008016	5	0.144006551562111	1.1410040943628
2008016	6	0.183084359667843	1.32631832361484
2008016	7	0.209149451608825	1.40980166536514
2008016	8	0.26462086874128	1.60900467628195
2008016	9	0.289815482610681	1.67633904463623
2008016	10	0.288167133485917	1.64102348504424
2008016	11	0.298495785982453	1.61155901081813
2008016	12	0.310620059935043	1.56609619666038
2008016	13	0.304240233453269	1.52116656180161
2008016	14	0.307246615461951	1.53424277736232
2008016	15	0.299309739403389	1.49664456365575
2008016	16	0.300790233082264	1.46324752644534
2008016	17	0.308916504722013	1.49425842672316
2008016	18	0.306760661819015	1.48611140853627
2008016	19	0.320883571455633	1.60319376144375
2008016	20	0.378966186981522	1.96498168784674
2008016	21	0.441714139061354	2.34046307790951
2008016	22	0.460143144750688	2.4702746765787
2008016	23	0.415772651540509	2.34789370210784
2008017	0	0.369199468095132	2.06080803619013
2008017	1	0.35254916287187	1.91068436165028
2008017	2	0.351358794747742	1.85804324418993
2008017	3	0.371842235718745	1.86001947039761
2008017	4	0.370806050332	1.78975663828502
2008017	5	0.362873248913471	1.71463280543709
2008017	6	0.353842586144373	1.64192906320251
2008017	7	0.357438467688087	1.61657712564374
2008017	8	0.363359944591881	1.58599978272922
2008017	9	0.353110769423049	1.4844069450047
2008017	10	0.346357863852552	1.4170849634918
2008017	11	0.34691690235448	1.37567249537468
2008017	12	0.41433710178528	1.31453718331902
2008017	13	0.241704511598369	0.857401654402341
2008017	14	0.0709012701752882	0.324307603707947
2008017	15	0.0723890594260732	0.374123932932878
2008017	16	0.0878685729433165	0.489662920552713
2008017	17	0.0877311342674669	0.49907750254362
2008017	18	0.103217133983555	0.517560750014396
2008017	19	0.120831569850445	0.617589409526029
2008017	20	0.0864388386990202	0.50931576135171
2008017	21	0.0432191520338506	0.310764186328488
2008017	22	0.0334341593890299	0.300555346188716
2008017	23	0.0344331426163664	0.259712274585038
2008018	0	0.110995054891867	0.695519978921581
2008018	1	0.175131119222801	1.11969832576354
2008018	2	0.152205972902492	1.12956380752059
2008018	3	0.124462654517962	1.01637955480821
2008018	4	0.0979033112074522	0.830454889633322
2008018	5	0.0901868401613588	0.664835189824046
2008018	6	0.0966948369609094	0.674684127348592
2008018	7	0.143074277071921	0.876160567532311
2008018	8	0.184408032078797	1.09871049171803
2008018	9	0.200902759942753	1.2165997432679
2008018	10	0.246937291801144	1.46861698452715
2008018	11	0.285955254565364	1.80698965586561
2008018	12	0.299154312133795	1.94269505080465
2008018	13	0.325842196766853	1.983069901909
2008018	14	0.348837549807982	1.888016613151
2008018	15	0.353474277564191	1.75319296731018
2008018	16	0.272712939775658	1.38085999480909
2008018	17	0.240457258906809	1.31804274042719
2008018	18	0.20502847620698	1.22740814641165
2008018	19	0.125958710612394	0.828731134417074
2008018	20	0.102771934005027	0.943460433907141
2008018	21	0.102273512746872	1.15185325153501
2008018	22	0.0817000527280876	1.18705301488027
2008018	23	0.0815310568268033	1.08548370907354
2008019	0	0.160580307427662	2.00786406796454
2008019	1	0.251082469339602	2.81040503710496
2008019	2	0.64405186707105	6.36482034164709
2008019	3	0.744650005290674	6.66649651493374
2008019	4	0.631020559771285	4.33456260134328
2008019	5	0.745278982367814	4.53291967556933
2008019	6	0.42569698998806	2.54112202490616
2008019	7	0.487405672925738	2.83766969343948
2008019	8	0.444639630142176	2.61909095421584
2008019	9	0.346377464603037	2.08615816374966
2008019	10	0.300476222677971	1.77242341832421
2008019	11	0.273426507854485	1.59336404151995
2008019	12	0.281756912177129	1.54226432507243
2008019	13	0.329652663585547	1.68706086352584
2008019	14	0.370190915859906	1.84946787445818
2008019	15	0.355436751362033	1.75204827299429
2008019	16	0.408000455033892	1.98825225136277
2008019	17	0.478286878169108	2.36775542182154
2008019	18	0.512341946143565	2.55792777223986
2008019	19	0.45891808982755	2.30986233091213
2008019	20	0.407751043235673	1.99784157533997
2008019	21	0.42416780037994	2.01376308057648
2008019	22	0.449617379632102	2.08279237557841
2008019	23	0.461230795079035	2.05515191968235
2008020	0	0.482448056504799	2.01795979222586
2008020	1	0.48347473732548	1.91944432789656
2008020	2	0.487594257408597	1.85213154808133
2008020	3	0.502336347013606	1.86228898609419
2008020	4	0.520239095082525	1.87178028955624
2008020	5	0.495092244642727	1.79781484773547
2008020	6	0.425495059383201	1.59186605301882
2008020	7	0.361420766280603	1.27588378184465
2008020	8	0.301228777671525	1.04100430067491
2008020	9	0.263961221292343	0.914026775913708
2008020	10	0.248654196726099	0.853053641048721
2008020	11	0.226317684367123	0.777106804595103
2008020	12	0.199522983840869	0.694325571408603
2008020	13	0.174010383748745	0.631500469983023
2008020	14	0.14119020885481	0.54294570144821
2008020	15	0.1159105635622	0.449188851315353
2008020	16	0.106031279442111	0.418852825461165
2008020	17	0.131134040801429	0.540615238942113
2008020	18	0.179036558581242	0.818977757793788
2008020	19	0.216678478347604	0.992454165561271
2008020	20	0.220468270729389	0.988699536208471
2008020	21	0.213828105937105	0.954586188830712
2008020	22	0.192306791387336	0.866501261453167
2008020	23	0.230343597029575	0.912518917851931
2008021	0	0.269841960513731	1.20821656841331
2008021	1	0.317744351816477	1.50980025702902
2008021	2	0.38450577520926	1.76907759710829
2008021	3	0.442380592371989	1.96916645941554
2008021	4	0.459643862738663	2.07668750098805
2008021	5	0.444445678991806	2.05062371127257
2008021	6	0.450695472992262	2.0483710131109
2008021	7	0.458716515121066	2.07931082429885
2008021	8	0.481823426751167	2.11860728041575
2008021	9	0.486204840781135	2.10633968614687
2008021	10	0.478225785846893	2.07104353695493
2008021	11	0.479757547971534	2.02813274772237
2008021	12	0.47449925546032	1.98491100594394
2008021	13	0.474256140059183	1.94013148209673
2008021	14	0.466261057178696	1.87727881485089
2008021	15	0.408182431611298	1.70897447166936
2008021	16	0.342457823930313	1.57050106298344
2008021	17	0.242550291443989	1.3083482005588
2008021	18	0.188775154243759	1.11319918783762
2008021	19	0.271620453242504	1.34226698917198
2008021	20	0.362914111340052	1.60951028303426
2008021	21	0.457069340702723	1.86530279469549
2008021	22	0.534405220877187	2.12982233411964
2008021	23	0.563250365214702	2.30214604333718
2008022	0	0.574938117202002	2.45805220110634
2008022	1	0.644468098730508	2.62233594474882
2008022	2	0.695163539313214	2.63790114029627
2008022	3	0.579469801704755	2.48086212001994
2008022	4	0.235264950066859	1.14700090439907
2008022	5	0.17180304793821	0.773749378977214
2008022	6	0.289323691237957	1.12144910558704
2008022	7	0.439898660357051	1.58030213281032
2008022	8	0.51173684176677	1.55561734765251
2008022	9	0.476921510513634	1.26070242326779
2008022	10	0.268171804375588	0.742283903696563
2008022	11	0.204850645591563	0.573214531885873
2008022	12	0.19501377749488	0.549742566803912
2008022	13	0.202149389858572	0.561862119621512
2008022	14	0.241811954953654	0.620628191142732
2008022	15	0.274024089144195	0.807478801445367
2008022	16	0.336102762802287	1.22856771968693
2008022	17	0.413543269588044	1.42678512255152
2008022	18	0.403590157948849	1.3795380842836
2008022	19	0.421536850248964	1.34449335365404
2008022	20	0.503805939299975	1.57410616855915
2008022	21	0.559508329658547	1.77632472657914
2008022	22	0.570466796613857	1.85042414427536
2008022	23	0.557657749651359	1.80020336427334
2008023	0	0.514826404496287	1.62444017230251
2008023	1	0.477008387192236	1.49258078309385
2008023	2	0.471787274443086	1.45101514410239
2008023	3	0.443079647320041	1.39305121204121
2008023	4	0.39944351480936	1.22415190695272
2008023	5	0.320167438353946	1.10265399074658
2008023	6	0.321670038674932	1.0768874083547
2008023	7	0.305035917374968	1.15431887369348
2008023	8	0.277651901138099	1.19845180035052
2008023	9	0.185819299145471	1.0261041984049
2008023	10	0.110681018708407	0.901801107919617
2008023	11	0.0865549037268544	0.794439536619894
2008023	12	0.0907217994763711	0.83980581265152
2008023	13	0.109686686615422	1.05079875324468
2008023	14	0.12553772839671	1.24583486826655
2008023	15	0.133217714335847	1.24789588422614
2008023	16	0.125741643502208	1.04325267575793
2008023	17	0.140635812110837	1.06206271230794
2008023	18	0.219076324956271	1.6003619532015
2008023	19	0.262794866382214	1.91776539180386
2008023	20	0.279939011730211	2.14770526642838
2008023	21	0.332614312556723	2.77713539092513
2008023	22	0.363419367927683	3.21250264471918
2008023	23	0.422688021055275	3.73098576770383
2008024	0	0.475887907152593	4.14662292501771
2008024	1	0.502416197820479	4.34859571020788
2008024	2	0.567705046934031	4.93599295651409
2008024	3	0.636122051607265	5.26378530703523
2008024	4	0.637855237919428	5.07756968862483
2008024	5	0.664629260103905	5.03845145906715
2008024	6	0.711583226105036	5.15864587354245
2008024	7	1.04233447006001	4.80319684709546
2008024	8	0.781655101949902	4.69374394957801
2008024	9	0.344652134162101	2.0713523723984
2008024	10	0.408722482839615	2.31978399889712
2008024	11	0.431788570864035	2.32336639686987
2008024	12	0.424577202579497	2.20847425894704
2008024	13	0.357460854380979	1.93671135643133
2008024	14	0.36245296743338	1.97717457206527
2008024	15	0.376167893768422	2.10013137780574
2008024	16	0.368323180035754	2.0979619501703
2008024	17	0.385142713338701	2.14079243413214
2008024	18	0.350332368195828	2.13069322213119
2008024	19	0.36598401685576	2.26258886537709
2008024	20	0.455124299947912	2.55612204209189
2008024	21	0.466056982687464	2.59676384363737
2008024	22	0.457190372440658	2.54385496738907
2008024	23	0.471321894831651	2.59956890240369
2008025	0	0.473747715413903	2.57748650785529
2008025	1	0.420139722766108	2.28816491702075
2008025	2	0.380621151890645	2.10908716102348
2008025	3	0.358600548529475	1.97297319900762
2008025	4	0.356468998299124	1.98755566248549
2008025	5	0.435176990741881	2.47591171341765
2008025	6	0.446463976669503	2.62922233808247
2008025	7	0.466638244436365	2.8351148041927
2008025	8	0.48902174769375	3.16665828183919
2008025	9	0.53154298232785	3.64109542884735
2008025	10	0.511873705529009	3.86763893823787
2008025	11	0.433111174431852	3.79960799244557
2008025	12	0.319634060624896	2.94336987116503
2008025	13	0.4153477884738	3.66314237146926
2008025	14	0.504124274310284	4.08687912724201
2008025	15	0.516958195160102	4.19056390819284
2008025	16	0.523386000901844	4.06665010568374
2008025	17	0.534205752179382	3.99487462916337
2008025	18	0.554294770104609	3.99697518995824
2008025	19	0.555203206196576	3.86403459920132
2008025	20	0.543568199337724	3.73468060816304
2008025	21	0.520814296545046	3.64979069950263
2008025	22	0.491664686700417	3.50171786783406
2008025	23	0.458302672422617	3.34716426587758
2008026	0	0.455583683208214	3.30239489403922
2008026	1	0.423935648959756	3.30578185788695
2008026	2	0.407004937846706	3.34711966140087
2008026	3	0.409229791569652	3.41631795547168
2008026	4	0.384523267339291	3.38389468490568
2008026	5	0.341706701120521	3.42746626273976
2008026	6	0.354051113695673	3.59719451403938
2008026	7	0.368376869639733	3.62259498579705
2008026	8	0.335356897386225	3.44625475938008
2008026	9	0.291940001968134	3.27491195204449
2008026	10	0.289431622607769	2.69693922715889
2008026	11	0.355889900039851	2.20560733737093
2008026	12	0.425537220322163	2.4194350175815
2008026	13	0.440083110714632	2.45502468832811
2008026	14	0.456314430490651	2.49577173996092
2008026	15	0.400426722731423	2.41106687844237
2008026	16	0.260018219497097	1.65164578884164
2008026	17	0.418335238664616	2.51218150710111
2008026	18	0.532567845401041	3.03987650869056
2008026	19	0.615095772814322	3.46137044529339
2008026	20	0.680150713913518	3.7404402902065
2008026	21	0.664785362708112	3.60722534482828
2008026	22	0.631335545489431	3.39216329215913
2008026	23	0.565898669324332	3.03868095713549
2008027	0	0.503158725247379	2.75087887165171
2008027	1	0.430688405598226	2.40684020655567
2008027	2	0.364101674113637	2.10947774233752
2008027	3	0.288424971135309	1.80976575905452
2008027	4	0.137651472962422	0.945780442211698
2008027	5	0.0875095728005354	0.577759466259444
2008027	6	0.0574884270362136	0.393693428462434
2008027	7	0.0403522194810868	0.264328974926765
2008027	8	0.0446785030463242	0.271459009178953
2008027	9	0.0375885590165076	0.22013547919925
2008027	10	0.0249466994579346	0.151163610404939
2008027	11	0.0231080188098387	0.142887655153262
2008027	12	0.0287257310787747	0.181797463138408
2008027	13	0.0883184677192808	0.546087493962667
2008027	14	0.208942211563564	1.31016674730036
2008027	15	0.452153620527152	2.69295176896625
2008027	16	0.681455257133834	3.86432676745089
2008027	17	0.79129144267575	4.72676327102683
2008027	18	0.85091616771083	5.3892391489984
2008027	19	0.849915656295177	5.63246977876907
2008027	20	0.833364303374117	5.85443515924469
2008027	21	0.823493738715954	5.96463214531084
2008027	22	0.969474496211981	5.89906723298992
2008027	23	1.05878327125275	5.76134484443215
2008028	0	1.03125574357963	5.39466703805704
2008028	1	1.03404473504707	4.89477877148497
2008028	2	0.920838682706537	4.20796022114761
2008028	3	0.777278125195774	3.55093196224935
2008028	4	0.652802411201385	3.04140088506925
2008028	5	0.568938092574919	2.7925299947858
2008028	6	0.530469979883536	2.72671538842514
2008028	7	0.550106222352848	2.46808427958552
2008028	8	0.500024439683627	1.90573277454226
2008028	9	0.429944761191498	1.40563420369417
2008028	10	0.423404377628131	1.09583415568455
2008028	11	0.376149072884736	0.914876149004689
2008028	12	0.407833932154519	0.918559588228417
2008028	13	0.594225303329515	1.55342415494591
2008028	14	0.763034322276297	2.06104332942164
2008028	15	0.721428744661979	2.05733291216746
2008028	16	0.729718079209971	2.13937599497428
2008028	17	0.651323220747144	2.12885376095501
2008028	18	0.575087921027727	1.95893654529519
2008028	19	0.533875395476223	1.86649556195332
2008028	20	0.535798591366541	1.86356919568418
2008028	21	0.516237172658454	1.83722181521314
2008028	22	0.509566362538248	1.81562960701174
2008028	23	0.501610577894649	1.85789761584334
2008029	0	0.493754363360744	1.97386333876224
2008029	1	0.507614096504709	2.09008997919478
2008029	2	0.536621103979334	2.29303270253661
2008029	3	0.553688327956653	2.44137532969634
2008029	4	0.5625256949988	2.50790785292146
2008029	5	0.536712015396356	2.5041537784693
2008029	6	0.512331770000436	2.34639629737848
2008029	7	0.446077124145125	2.17295426172397
2008029	8	0.398818144217702	1.93279213629593
2008029	9	0.353446053706541	1.74907598295874
2008029	10	0.331387491588061	1.66738807119271
2008029	11	0.31556234013395	1.62959428191127
2008029	12	0.298188275184768	1.66183976776685
2008029	13	0.264104741676451	1.72907694733004
2008029	14	0.231221284394872	1.76911756458309
2008029	15	0.238084900330856	1.79375857822184
2008029	16	0.21034920758295	1.87999234067875
2008029	17	0.226492452966976	2.15376991631969
2008029	18	0.201311766382343	2.30246279351257
2008029	19	0.202725419978555	2.32634198108716
2008029	20	0.20331469327672	2.35503918890738
2008029	21	0.212214295068469	2.34703507791486
2008029	22	0.217382277658866	2.31051183883768
2008029	23	0.219860469012326	2.2760056128798
2008030	0	0.187198710653508	1.90554148050658
2008030	1	0.121572632531939	1.29607562925393
2008030	2	0.088199740874978	0.589389776584809
2008030	3	0.0803067385653548	0.348240155121242
2008030	4	0.211071760664963	0.794245144919201
2008030	5	0.253194421590212	0.929891252439641
2008030	6	0.266012026551138	0.979716191061651
2008030	7	0.432968310989836	1.62361721988305
2008030	8	0.464294092017207	1.72493035387216
2008030	9	0.479292879742075	1.70609666492823
2008030	10	0.569842052102898	1.87812113937911
2008030	11	0.670457926826108	2.22681236617279
2008030	12	0.633399450971646	2.22075182435562
2008030	13	0.506043435972787	1.88030640083942
2008030	14	0.29533986193358	1.38563024311582
2008030	15	0.151281274435388	0.784879779761984
2008030	16	0.194535278704806	0.959534219801524
2008030	17	0.369469719934741	1.81285705715773
2008030	18	0.381912223945681	1.86892974423616
2008030	19	0.392102410540172	1.85532232940236
2008030	20	0.393429758874144	1.79313382086639
2008030	21	0.340600251042414	1.49694146660574
2008030	22	0.280194881557869	1.21812437102582
2008030	23	0.279838229510355	1.19719165130542
2008031	0	0.331513085523236	1.28320153758673
2008031	1	0.371132287798352	1.41586307598944
2008031	2	0.369253923685476	1.40200390470318
2008031	3	0.351464384752739	1.35761036859366
2008031	4	0.340414592471815	1.36458692558759
2008031	5	0.331361447624075	1.40731022368865
2008031	6	0.342255717578996	1.4499889623589
2008031	7	0.316189979007936	1.41987205862425
2008031	8	0.261622474117339	1.2723051962197
2008031	9	0.219972824921118	1.16152279587766
2008031	10	0.183956256889123	1.09664239143794
2008031	11	0.191544689717835	1.17207760849098
2008031	12	0.205187448717734	1.28750347910647
2008031	13	0.245079729227317	1.58367329588717
2008031	14	0.271843734645542	1.74883616892113
2008031	15	0.248628330776674	1.82681370369268
2008031	16	0.180423392584568	1.76890119039262
2008031	17	0.137533072898641	1.61698002516796
2008031	18	0.241415907963014	1.827996930888
2008031	19	0.338231761917604	2.22080040371696
2008031	20	0.355521257803676	2.20914509939835
2008031	21	0.373195733705506	2.32543368423779
2008031	22	0.452546413817247	2.6956042210195
2008031	23	0.552022912251408	3.2807798268027
2008032	0	0.57067041488897	3.39914685706163
2008032	1	0.604230613021412	3.70013462129506
2008032	2	0.577287917831864	3.58004151939244
2008032	3	0.49651258153708	3.37375426028595
2008032	4	0.552271329840483	3.48788769039298
2008032	5	0.522453088627085	3.65029791532713
2008032	6	0.313963292678957	2.30015911734542
2008032	7	0.250094416789426	1.93673533935486
2008032	8	0.28443516328382	2.03159701578526
2008032	9	0.584407468293937	3.64795699281281
2008032	10	0.665713108290639	4.18698142218869
2008032	11	0.684978303693746	4.30305159701179
2008032	12	0.705982160623037	4.38331331701513
2008032	13	0.720561804290495	4.32402589460258
2008032	14	0.74884002365043	4.30819107169344
2008032	15	0.694170377907933	3.99659745782995
2008032	16	0.470182685615187	2.771009585636
2008032	17	0.339093339263134	1.91195896474611
2008032	18	0.417157988407954	2.07027221865343
2008032	19	0.387629231060166	2.27746422696502
2008032	20	0.280831781897891	1.61773577116441
2008032	21	0.605672245777201	3.59492983048523
2008032	22	0.314370263486091	2.02638884736868
2008032	23	0.607370407277802	3.45769061094168
2008033	0	1.14509096839351	6.00693003930221
2008033	1	1.08952696371708	5.59184678923053
2008033	2	1.07926301954632	5.53121681862344
2008033	3	1.09108089439878	5.65983111403668
2008033	4	0.658524324428665	3.93266208191214
2008033	5	0.224625472002992	1.46979438883435
2008033	6	0.404473773249857	2.63034179101606
2008033	7	0.767632958971631	5.11102183343112
2008033	8	0.765564365195858	4.12027170648722
2008033	9	0.692402246834249	3.59711549414633
2008033	10	0.490330291867229	2.88596309347583
2008033	11	0.669803552259451	3.71007954607225
2008033	12	0.624196658286116	3.60446208107957
2008033	13	0.585086191932869	3.19298095193908
2008033	14	0.491106631820998	2.51133494103525
2008033	15	0.516662347551999	2.45880126148715
2008033	16	0.707017080109885	3.32149854525842
2008033	17	0.552520396492166	2.5553137541685
2008033	18	0.351539569757003	1.62110110135878
2008033	19	0.360728251187415	1.6180221407661
2008033	20	0.442349994357821	2.00517805719253
2008033	21	0.426964577348721	1.92097851646732
2008033	22	0.41319261901806	1.81565549685831
2008033	23	0.452571772715011	1.86120286526597
2008034	0	0.495444675837797	2.06135895230354
2008034	1	0.493420164348025	2.09123608382569
2008034	2	0.407008420124741	1.56210197000705
2008034	3	0.394184964846044	1.50398556042418
2008034	4	0.437512140586638	1.71043554381865
2008034	5	0.489271955135391	1.9022866482209
2008034	6	0.523698547739875	1.795202776994
2008034	7	0.552329380668448	1.66507814364784
2008034	8	0.481084600367931	1.56830423987731
2008034	9	0.409899788411061	1.45785311171533
2008034	10	0.401727268254101	1.43717834475312
2008034	11	0.358306588937005	1.3594609786282
2008034	12	0.308528308026022	1.12780149273892
2008034	13	0.256030797512077	0.922325694348947
2008034	14	0.284029242191353	1.00816643726163
2008034	15	0.300966947007155	1.0661743460967
2008034	16	0.367680118721339	1.03167872694121
2008034	17	0.210158350357981	0.482642075100313
2008034	18	0.1354370070513	0.31862676495815
2008034	19	0.135029114795411	0.324295987904085
2008034	20	0.155466472454441	0.338302678861925
2008034	21	0.127909040732753	0.303188068188798
2008034	22	0.124798049778425	0.330631641619417
2008034	23	0.141096168343759	0.415444042766906
2008035	0	0.15304925000449	0.469481725364081
2008035	1	0.159687423537514	0.479535127984695
2008035	2	0.168738729625234	0.482742388608023
2008035	3	0.171684769379517	0.474066006674938
2008035	4	0.158202100340033	0.45561250341004
2008035	5	0.15236024777834	0.440339204549097
2008035	6	0.14611089020338	0.424865417143985
2008035	7	0.133784426517457	0.405639636758541
2008035	8	0.132076926831973	0.400289580653889
2008035	9	0.132121575928719	0.39778037028414
2008035	10	0.127010392850614	0.385238024482772
2008035	11	0.117773081602992	0.346057746940783
2008035	12	0.104797436692164	0.310104241820846
2008035	13	0.107653441304086	0.311738265672797
2008035	14	0.106382095617848	0.340256211303308
2008035	15	0.0912785793311887	0.36386980220613
2008035	16	0.0721632682065776	0.393704070402263
2008035	17	0.0759358509388261	0.463755293198228
2008035	18	0.111260011197835	0.544800248942312
2008035	19	0.259748024872724	1.08602120018368
2008035	20	0.343255112273096	1.26601130823663
2008035	21	0.375766973542965	1.38562087003357
2008035	22	0.391870683301799	1.47272825916018
2008035	23	0.370624661876217	1.48985373058833
2008036	0	0.333823248557795	1.42086289387008
2008036	1	0.220177684655727	1.09797435719292
2008036	2	0.113737690056983	0.657872847598094
2008036	3	0.108693343075135	0.575282413696099
2008036	4	0.121778656772266	0.677433566184821
2008036	5	0.121445862466213	0.736717148798402
2008036	6	0.117460030497023	0.675088531222573
2008036	7	0.0985243422131507	0.600526485391666
2008036	8	0.0999696696777806	0.584512449111582
2008036	9	0.092223929868405	0.646699196649173
2008036	10	0.12348314044583	0.962469588257638
2008036	11	0.093537079967646	0.867112807337791
2008036	12	0.0352946978064735	0.349815647437114
2008036	13	0.0306557445537192	0.313888463976106
2008036	14	0.0498844266258854	0.60482862163104
2008036	15	0.0745486847523882	1.00922522228567
2008036	16	0.0710345202484882	1.0447365760278
2008036	17	0.103985472854014	1.44589241254075
2008036	18	0.113470874742658	1.45575342820702
2008036	19	0.114931885131024	1.42744173717335
2008036	20	0.118440006292413	1.46585891857655
2008036	21	0.139020682809253	1.69660825302648
2008036	22	0.135681663938435	1.60139763009106
2008036	23	0.125507782809126	1.48400487569727
2008037	0	0.116757605284973	1.32040807368714
2008037	1	0.118234627337749	1.24753611737928
2008037	2	0.117525085078303	1.11845413878038
2008037	3	0.168870345316343	1.16164703025333
2008037	4	0.210608599281958	1.07167066119836
2008037	5	0.209932310182207	1.07846406660864
2008037	6	0.233755684570665	1.26618214760056
2008037	7	0.294346028546682	1.70513577395518
2008037	8	0.285972836943133	1.72366622800262
2008037	9	0.369898861667928	1.96847786100091
2008037	10	0.512937113897665	2.54720693603334
2008037	11	0.528369654066675	2.67321983748608
2008037	12	0.528930883855665	2.72329290822575
2008037	13	0.530400090519595	2.80587595686967
2008037	14	0.558624827438894	3.06640520392861
2008037	15	0.616104396073906	3.57011440886603
2008037	16	0.664686405084405	3.63052939631612
2008037	17	0.577665701194704	3.25781752310441
2008037	18	0.486846759094041	2.74516626703095
2008037	19	0.522340371625655	2.68431424250814
2008037	20	0.54694320441805	2.83229446947406
2008037	21	0.469024257563914	2.66435954747698
2008037	22	0.40153605111823	2.31615546772879
2008037	23	0.384438872167624	2.20700300541444
2008038	0	0.409575682485988	2.31617916971404
2008038	1	0.459371949690866	2.52489490773616
2008038	2	0.488035846371559	2.61833325651358
2008038	3	0.49030166144725	2.57532476135907
2008038	4	0.468299721021184	2.47924079077385
2008038	5	0.453803911690642	2.45098996325458
2008038	6	0.454934231044603	2.47030691686579
2008038	7	0.442921528079228	2.4543713113405
2008038	8	0.46259365847998	2.40155626145323
2008038	9	0.498700375028658	2.31414324181686
2008038	10	0.55124349830517	2.22211162766407
2008038	11	0.538219859698183	1.98750969873143
2008038	12	0.496613123928133	1.7655037406673
2008038	13	0.461295528525223	1.55608366295566
2008038	14	0.341787098217891	1.17209002950984
2008038	15	0.276469869993875	0.930772984499928
2008038	16	0.26433532924565	0.917660483313209
2008038	17	0.276679533696157	0.966606874586819
2008038	18	0.301762119939428	0.994826728382297
2008038	19	0.306791630419611	0.955181304671908
2008038	20	0.293415107586229	0.903908624300703
2008038	21	0.286176756658825	0.890789356059812
2008038	22	0.298424214327538	0.989976322978957
2008038	23	0.319172639044815	1.15074202637556
2008039	0	0.36139888505444	1.40260624787273
2008039	1	0.424848029701693	1.85920704556283
2008039	2	0.405755142315146	2.19331935773694
2008039	3	0.348497918799689	2.23814084477394
2008039	4	0.305754810790832	2.19082698855349
2008039	5	0.254323477618097	2.10143758896227
2008039	6	0.208927447784341	1.97819376118089
2008039	7	0.201277161458997	1.83570295585475
2008039	8	0.199156693844278	1.68867189133822
2008039	9	0.195034492502537	1.50784745604863
2008039	10	0.185584093734647	1.28644327902734
2008039	11	0.193748489662251	1.08052974586885
2008039	12	0.18611258227127	0.897682562943441
2008039	13	0.176183422670907	0.755505730035926
2008039	14	0.15379434584064	0.648125137669599
2008039	15	0.14284346076257	0.572805279724142
2008039	16	0.130539564216467	0.522677307166187
2008039	17	0.120063276610476	0.492579548110914
2008039	18	0.121475823753015	0.483587985195603
2008039	19	0.122060768025872	0.494097860343007
2008039	20	0.134879050717689	0.545846063074314
2008039	21	0.156951442501743	0.644986008336159
2008039	22	0.169162380408934	0.744957948000536
2008039	23	0.180432668088962	0.811518864192403
2008040	0	0.204123014433507	0.843054168090213
2008040	1	0.209824720950583	0.795725111873992
2008040	2	0.177647592722547	0.663268145658528
2008040	3	0.137475869287242	0.507522787230316
2008040	4	0.106350687673635	0.394950774583784
2008040	5	0.0815671557548091	0.286319567053468
2008040	6	0.068180759892119	0.220469009436036
2008040	7	0.06345344330951	0.20553503254716
2008040	8	0.0669669385721367	0.215522387819469
2008040	9	0.0711428245566292	0.223741920757412
2008040	10	0.0738373241362159	0.226932087152098
2008040	11	0.0768428186644122	0.230675191319964
2008040	12	0.0792144617286994	0.232901303189856
2008040	13	0.079012084418301	0.233787989441083
2008040	14	0.0749762506551087	0.227107510861285
2008040	15	0.0757643354268901	0.220010254205513
2008040	16	0.0777313478545253	0.21995377111573
2008040	17	0.083366718287178	0.229577577829133
2008040	18	0.0933219054775718	0.247637184210362
2008040	19	0.107131542067008	0.275472351768621
2008040	20	0.111994593838077	0.290183434037441
2008040	21	0.115750488315133	0.309364017123497
2008040	22	0.120856568993159	0.326776684870148
2008040	23	0.125929761016069	0.342893014295656
2008041	0	0.127228133522342	0.357382649602011
2008041	1	0.125568761241835	0.366926726616225
2008041	2	0.120432990218044	0.367188947623393
2008041	3	0.110808424353973	0.358213527473355
2008041	4	0.101894194524958	0.346918988473832
2008041	5	0.0957844095685461	0.337019604078448
2008041	6	0.0886288956879491	0.328862464832107
2008041	7	0.0828719741744385	0.320671386675659
2008041	8	0.0785206929668386	0.313213570430218
2008041	9	0.0752978048832871	0.305254035035119
2008041	10	0.0736537952168612	0.295413648504369
2008041	11	0.0728100945972448	0.284530615480567
2008041	12	0.0726390930021323	0.277757677017763
2008041	13	0.0701450403395461	0.270358056504395
2008041	14	0.0734508409819921	0.263172496997822
2008041	15	0.0770972485229692	0.251780628106019
2008041	16	0.0738649067403005	0.241461518020304
2008041	17	0.0716884110237014	0.237460655658577
2008041	18	0.0690984421025896	0.234250462620485
2008041	19	0.0651475890473723	0.231073900084604
2008041	20	0.0621174683583072	0.227627064187157
2008041	21	0.0590408986142618	0.224061813606806
2008041	22	0.0547809124606332	0.220353411671082
2008041	23	0.0510907752619424	0.216260266898291
2008042	0	0.0475845162132677	0.211574523573202
2008042	1	0.0451446437550406	0.205222696303616
2008042	2	0.0423368568707985	0.197913169802603
2008042	3	0.0400302899074453	0.191459892657393
2008042	4	0.0383856687757748	0.185810626501785
2008042	5	0.0375035070539307	0.180775766304802
2008042	6	0.0358113540964478	0.176307857033025
2008042	7	0.0348082947762882	0.172785544656201
2008042	8	0.0338981102532056	0.169443339005053
2008042	9	0.0331977055716403	0.165641712227332
2008042	10	0.0326996769718934	0.161382373334445
2008042	11	0.032506454468929	0.155942868585754
2008042	12	0.0323803472766001	0.148825245150285
2008042	13	0.030754734977393	0.141839643549879
2008042	14	0.027872931574856	0.136486322172022
2008042	15	0.0251496398464214	0.136589417029357
2008042	16	0.0238435021039918	0.141400524947201
2008042	17	0.0240119511065299	0.158707582223787
2008042	18	0.0266262025599215	0.183733011922225
2008042	19	0.0342658066279143	0.22824580889119
2008042	20	0.0516817816951933	0.333832206575419
2008042	21	0.0857542257413869	0.565856800778954
2008042	22	0.100801149722377	0.661020956609708
2008042	23	0.121009094865385	0.728774474451775
2008043	0	0.133878043312521	0.796303713089562
2008043	1	0.143290556592492	0.824187691275993
2008043	2	0.158990332407534	0.824813569358105
2008043	3	0.179137434054092	0.813122628454819
2008043	4	0.175034123297024	0.784158525656546
2008043	5	0.164106902507862	0.726965110564751
2008043	6	0.149421890596847	0.664473984778989
2008043	7	0.137889056451883	0.620878243490971
2008043	8	0.128707302921313	0.580500738653469
2008043	9	0.122220690713639	0.537156695020139
2008043	10	0.114558065768305	0.500486790376311
2008043	11	0.110511149248287	0.473435705745374
2008043	12	0.107317261515556	0.456980693695603
2008043	13	0.105332660780661	0.448221997704101
2008043	14	0.103677453799554	0.443779697090792
2008043	15	0.101782580723488	0.440000708207524
2008043	16	0.0986864909601415	0.436627306993061
2008043	17	0.0973832468060209	0.437987428604567
2008043	18	0.0971513401313489	0.439521436006456
2008043	19	0.0946579268977771	0.438710004407632
2008043	20	0.092217989893292	0.435102384564438
2008043	21	0.089087321109713	0.432355189389585
2008043	22	0.0834805731312084	0.431918962378259
2008043	23	0.079531626322887	0.430639167861791
2008044	0	0.0690499980676136	0.422707092941141
2008044	1	0.0645044381960693	0.405997595008563
2008044	2	0.0640899512375864	0.392564071512645
2008044	3	0.061053915622102	0.380146540529993
2008044	4	0.0561088450014025	0.3557837365139
2008044	5	0.0501964333774605	0.315424984509734
2008044	6	0.0375263468451559	0.250546717122011
2008044	7	0.0229473812032175	0.182574510387749
2008044	8	0.0188947804433683	0.157706881729382
2008044	9	0.0217999135493624	0.15806784138868
2008044	10	0.0264376022603804	0.178593736808996
2008044	11	0.0308957040381234	0.20000293265087
2008044	12	0.0321222940736866	0.205783631003032
2008044	13	0.0307507419673724	0.204194420081462
2008044	14	0.0278833209236069	0.18742371231671
2008044	15	0.0260980057166289	0.176072831072533
2008044	16	0.0383986293842531	0.191302089280754
2008044	17	0.140973610179329	0.583413688422967
2008044	18	0.343161500394425	1.69608126455918
2008044	19	0.391975495871288	2.27883568041865
2008044	20	0.347089089686404	2.3440118708093
2008044	21	0.319449791986654	2.35043834519672
2008044	22	0.307217870789522	2.32764062550832
2008044	23	0.290005645398602	2.26611680739441
2008045	0	0.298870968557724	2.00654076733878
2008045	1	0.237025760281181	1.51781604606701
2008045	2	0.168688372536243	0.96844422468415
2008045	3	0.107272014174654	0.58797040493901
2008045	4	0.069939106093651	0.411717603472354
2008045	5	0.0399446092347116	0.319046444480598
2008045	6	0.0228791881721804	0.237214193092852
2008045	7	0.0180366939489585	0.171027991732395
2008045	8	0.0187560592673999	0.143023782112057
2008045	9	0.0279057890425858	0.144013527369386
2008045	10	0.0404869324895087	0.147954836164149
2008045	11	0.0441700319195426	0.149401328431151
2008045	12	0.0462912798206184	0.141533089290479
2008045	13	0.050812825530613	0.133201128068705
2008045	14	0.0586110204388455	0.131295697900048
2008045	15	0.0683173035342959	0.133269584511123
2008045	16	0.0765687356915176	0.138081157134367
2008045	17	0.0858858052637158	0.145794412724068
2008045	18	0.0903659463369433	0.146655046755503
2008045	19	0.0905878783943279	0.145435679916564
2008045	20	0.0887522805790345	0.144352219150302
2008045	21	0.0873198219934489	0.146409316049241
2008045	22	0.0863783386379523	0.153364374816282
2008045	23	0.0895075457657321	0.171437001244254
2008046	0	0.0936921923197764	0.177384646722111
2008046	1	0.0935030048742191	0.171736274365226
2008046	2	0.0972858699983196	0.19222981409053
2008046	3	0.149299009258814	0.306727968221817
2008046	4	0.222129897512124	0.493591007958527
2008046	5	0.268767205178105	0.649833198172336
2008046	6	0.323594831816462	0.800136242903933
2008046	7	0.379994862019996	0.931320772101749
2008046	8	0.406568874670624	1.00076957086615
2008046	9	0.424370075764634	1.02676731663722
2008046	10	0.43001202618435	1.0194271935721
2008046	11	0.426594393696217	0.990227849250239
2008046	12	0.417694794931703	0.94345906305163
2008046	13	0.399409329377451	0.893760358139073
2008046	14	0.35378130412681	0.839306986863889
2008046	15	0.335098243725175	0.793527999659082
2008046	16	0.322559124589323	0.754142996096081
2008046	17	0.316617324162933	0.708616814808003
2008046	18	0.300259910701786	0.64970364698567
2008046	19	0.264193920158375	0.573458007287608
2008046	20	0.229131100418047	0.491663215031711
2008046	21	0.210797142087056	0.45071937937977
2008046	22	0.206423458280822	0.442492597291571
2008046	23	0.207002801587113	0.447922324565197
2008047	0	0.205769937967827	0.457645440120856
2008047	1	0.205811005993003	0.471098614501168
2008047	2	0.202578860684737	0.484536536601044
2008047	3	0.202848402467577	0.503237986765629
2008047	4	0.205769638929812	0.523386295813223
2008047	5	0.208726261591321	0.538249771645362
2008047	6	0.214071284540007	0.553259784929687
2008047	7	0.220506649095967	0.566394170345805
2008047	8	0.225425735988186	0.573984078160679
2008047	9	0.226523550803923	0.578337579245994
2008047	10	0.237661475294519	0.584396853821287
2008047	11	0.23501173323831	0.562639542917336
2008047	12	0.239276955555381	0.548472881483296
2008047	13	0.232774631379754	0.499713351668574
2008047	14	0.214000247816057	0.44623007315524
2008047	15	0.201633017926673	0.408473571947397
2008047	16	0.201796130289563	0.377450234074853
2008047	17	0.171452615619239	0.327857309355385
2008047	18	0.14832219678044	0.291796646742422
2008047	19	0.137602080423859	0.268110841437781
2008047	20	0.131977289654815	0.249392086906976
2008047	21	0.126105742282481	0.232611977580773
2008047	22	0.107761387084702	0.214318372547542
2008047	23	0.100623322045219	0.205352080120369
2008048	0	0.11585331580118	0.246696086911386
2008048	1	0.132262194019949	0.299987625208696
2008048	2	0.144325097767952	0.336942282968212
2008048	3	0.145056844398678	0.369117237162608
2008048	4	0.145881704972106	0.4007744151177
2008048	5	0.145372686562835	0.427965269918209
2008048	6	0.143264232994044	0.452268579979938
2008048	7	0.139753975258813	0.467876558699424
2008048	8	0.144111906798956	0.500883871311772
2008048	9	0.15467901664675	0.542968734366683
2008048	10	0.169543139614103	0.586993983918789
2008048	11	0.173353938979599	0.623544693689571
2008048	12	0.180863947794421	0.6596479399071
2008048	13	0.175522409889752	0.712246378158097
2008048	14	0.22165217205936	0.805334566863401
2008048	15	0.25181613456011	0.928508023099523
2008048	16	0.267576210021209	0.970254814867262
2008048	17	0.248503722745216	0.965379036943263
2008048	18	0.226357469369028	0.973899416529531
2008048	19	0.212638746323482	1.04269838453339
2008048	20	0.219362917202782	1.10448634754319
2008048	21	0.230098891499565	1.14397372796483
2008048	22	0.244335966479218	1.20351573928244
2008048	23	0.274321538885685	1.32545981510042
2008049	0	0.307860081379559	1.4982995828443
2008049	1	0.342400815385791	1.70291226242899
2008049	2	0.345304639513151	1.86378910004457
2008049	3	0.345329841720925	1.9739144798265
2008049	4	0.362435141724272	2.12656843425442
2008049	5	0.394468370150305	2.33655079914302
2008049	6	0.399557914817238	2.45109270446424
2008049	7	0.404003271367267	2.49026924104138
2008049	8	0.405781532660792	2.53596326813523
2008049	9	0.420866377814354	2.6888922451553
2008049	10	0.467024324083431	2.85727438656962
2008049	11	0.489533442664795	2.9820175487057
2008049	12	0.534075118034285	3.08236174603628
2008049	13	0.577976720354718	3.14048033062022
2008049	14	0.580008644003856	3.15693945050455
2008049	15	0.574001873803008	3.19319536703627
2008049	16	0.602905068668292	3.27755236829272
2008049	17	0.592500933862694	3.44587073291527
2008049	18	0.648411647053639	3.7298673174704
2008049	19	0.631730287337793	4.02330011436633
2008049	20	0.628146859487703	4.15615004483466
2008049	21	0.736925920959155	4.28426390256638
2008049	22	0.792914160096077	4.36964714016773
2008049	23	0.71602918043327	4.06854294487143
2008050	0	0.595028895608958	3.29983193047908
2008050	1	0.572056648797561	3.06819478903286
2008050	2	0.549616216091998	2.95532377643297
2008050	3	0.511983467811049	2.7479539848592
2008050	4	0.461560388048915	2.452446650261
2008050	5	0.402724175134678	2.1480453140085
2008050	6	0.316952831408633	1.82084503620846
2008050	7	0.247696461665969	1.52758730880788
2008050	8	0.236352586883731	1.42528802115766
2008050	9	0.240144413857753	1.46471179538849
2008050	10	0.261999382533531	1.61595961343374
2008050	11	0.244992351549124	1.6648584085202
2008050	12	0.262243819568134	1.57459620402397
2008050	13	0.304009288560727	1.44818958238919
2008050	14	0.321563841460409	1.17263252315089
2008050	15	0.224273241017605	0.701470953073042
2008050	16	0.101984153995613	0.306468596512202
2008050	17	0.0569404148487843	0.168763924159539
2008050	18	0.0477509266843348	0.143090652213834
2008050	19	0.0444754900188476	0.139753383281917
2008050	20	0.040069287679762	0.140708998093444
2008050	21	0.0472831297808657	0.16328067213659
2008050	22	0.0551576515619739	0.196314472032752
2008050	23	0.0497585035692375	0.195053147424402
2008051	0	0.0357119030100898	0.156518926495496
2008051	1	0.0243757621286167	0.109105765294413
2008051	2	0.0187403415415461	0.0855588569022864
2008051	3	0.0187494999661442	0.0848603741300441
2008051	4	0.0226924266582735	0.101693992568053
2008051	5	0.0253371345351753	0.113095850784313
2008051	6	0.0242832242111626	0.105997004115927
2008051	7	0.0199477928218222	0.0863855487291123
2008051	8	0.0153977160242338	0.0656063004412676
2008051	9	0.011414649564435	0.0464713141922445
2008051	10	0.00835801726921899	0.0324327157209385
2008051	11	0.00652118787310308	0.0238591285208366
2008051	12	0.00546466342304374	0.018708173108111
2008051	13	0.00470995543410565	0.0154404920208426
2008051	14	0.00398324767683398	0.0131670681892909
2008051	15	0.00349202605819145	0.0121414762254093
2008051	16	0.00334790199666521	0.0117610283562668
2008051	17	0.00333781599500032	0.0115521448322391
2008051	18	0.00397442875702537	0.0125149045235421
2008051	19	0.00466935023657367	0.0134612434812754
2008051	20	0.0051371329424808	0.0140483039476557
2008051	21	0.00612778199785558	0.015017141447691
2008051	22	0.00825993025327184	0.0172121753375418
2008051	23	0.0111861939364716	0.0203517466503804
2008052	0	0.0131171592294132	0.0235906673569702
2008052	1	0.017368095083779	0.0379773312611208
2008052	2	0.0264428751201685	0.0923146760262167
2008052	3	0.0536933371009263	0.223074100608736
2008052	4	0.0897812572387996	0.393943334371114
2008052	5	0.120937125066578	0.476574973503576
2008052	6	0.149460092502834	0.57153275755004
2008052	7	0.120851396790556	0.682826170052952
2008052	8	0.0922943604011764	0.64933644775885
2008052	9	0.129670734745941	0.714166234190095
2008052	10	0.141689506382049	0.783985174163484
2008052	11	0.140888061651719	0.857954772587154
2008052	12	0.158722573342718	1.03963876794696
2008052	13	0.190717183510313	1.2913697329069
2008052	14	0.202301821994756	1.47433642359071
2008052	15	0.179765461223493	1.64926160704247
2008052	16	0.13854718452536	1.57272830988343
2008052	17	0.184676843679248	2.26664430357816
2008052	18	0.291033633075648	3.11431130908703
2008052	19	0.377869972971	3.77381462877719
2008052	20	0.410937803583937	3.96184873370366
2008052	21	0.42071764167129	4.01741940125904
2008052	22	0.439776941307058	4.21040051866407
2008052	23	0.471243151138703	4.41308773573176
2008053	0	0.495173072146682	4.47469058606994
2008053	1	0.531682258733668	4.66544133074842
2008053	2	0.551727308320921	4.83090356690281
2008053	3	0.491438873302022	4.40872634990453
2008053	4	0.5162957441062	4.36223760242138
2008053	5	0.615469849318322	4.14125670580154
2008053	6	0.655021485957657	4.24972762997814
2008053	7	0.5067288878261	3.98408228219387
2008053	8	0.785220327970961	4.493220754257
2008053	9	0.988402766038512	5.0370519753527
2008053	10	0.478185916811306	4.42640378290897
2008053	11	0.307076542136623	3.05316209154594
2008053	12	0.316575834740393	3.07338593271406
2008053	13	0.537455031169298	4.68699278901411
2008053	14	0.441899035656843	4.15325765344707
2008053	15	0.177730362115685	1.69542808251347
2008053	16	0.631964337157024	4.51849389344655
2008053	17	0.530516315758822	3.04203138314447
2008053	18	0.467927782462483	2.71340250221516
2008053	19	0.529205191835694	3.11753735496764
2008053	20	0.521828018055717	3.16692376989328
2008053	21	0.569881104763967	3.30211968907694
2008053	22	0.582150539702071	3.34256955594713
2008053	23	0.539658257394846	3.1349049199911
2008054	0	0.527279840449973	3.05738605552377
2008054	1	0.52508130235118	3.12001651060299
2008054	2	0.539242802165385	3.25844161831522
2008054	3	0.539389358520579	3.28575707724678
2008054	4	0.568010330027628	3.34375173327522
2008054	5	0.59694185783059	3.41268434861905
2008054	6	0.616009507969052	3.41795567875246
2008054	7	0.620388446919387	3.32034289133765
2008054	8	0.608656329155253	3.14349820882419
2008054	9	0.595456413724022	3.01589919803068
2008054	10	0.584439115891717	2.90558154118446
2008054	11	0.554924964709841	2.7198637091397
2008054	12	0.475882563493249	2.39184542054134
2008054	13	0.361256309593206	1.88671306359615
2008054	14	0.395396771799464	1.89592392499393
2008054	15	0.445391551967168	2.13355114520952
2008054	16	0.330166591213342	1.90485649150004
2008054	17	0.242206189351144	1.51758859411866
2008054	18	0.194316229616131	1.32835157390086
2008054	19	0.249763630541945	2.20672464336837
2008054	20	0.366861792412882	3.44296336732748
2008054	21	0.530674032405701	4.61631840037412
2008054	22	0.66153416917292	5.4410536421784
2008054	23	0.763573906407165	6.0285894297258
2008055	0	0.817967443946025	6.31014992552798
2008055	1	0.894707990076973	6.57317156246846
2008055	2	0.900788703732418	6.02875237426677
2008055	3	0.783845103067146	5.63289906814289
2008055	4	0.687938215375831	5.83575557155295
2008055	5	0.69965758919045	5.71087039984322
2008055	6	0.616687813597987	4.97679169849545
2008055	7	0.487468416712355	4.21403612956775
2008055	8	0.399980234416303	3.92501668357778
2008055	9	0.389861299471032	4.17251501467224
2008055	10	0.420321222989592	4.44507184475401
2008055	11	0.415209121053257	4.23850057145722
2008055	12	0.403017107193792	4.01644745902302
2008055	13	0.369727381306537	3.78446767747075
2008055	14	0.354513266134009	3.87348840515939
2008055	15	0.388980752356206	4.08878195145072
2008055	16	0.464722795045918	4.35680047565832
2008055	17	0.485306457131331	4.2501000328226
2008055	18	0.40992758711401	3.6985682025317
2008055	19	0.336354764337495	3.57693611088073
2008055	20	0.286234628255451	3.6693939809564
2008055	21	0.403614480533875	2.88470483958401
2008055	22	0.0990044228922172	0.52868293062817
2008055	23	0.224214455751075	1.02428511144876
2008056	0	0.254639498501758	1.05782996987945
2008056	1	0.385657575823788	1.65857461349782
2008056	2	0.347998557853501	1.69903018473953
2008056	3	0.263860000203057	1.31257739025108
2008056	4	0.246053683869433	1.21769552896569
2008056	5	0.227549491542182	1.10809762813109
2008056	6	0.211266313498235	1.00435880063952
2008056	7	0.206701622449255	0.959304020706887
2008056	8	0.245340792291875	1.08311024123758
2008056	9	0.336106125402378	1.30045571013716
2008056	10	0.37833612280489	1.40099392099062
2008056	11	0.38908398975003	1.36663723313132
2008056	12	0.398962903164107	1.3005407756547
2008056	13	0.374990924396595	1.14704521466565
2008056	14	0.323823040977115	0.988906059413614
2008056	15	0.304502261273883	0.889763241510391
2008056	16	0.284162517379153	0.828931611255273
2008056	17	0.279695168525686	0.756464259909641
2008056	18	0.238922962460074	0.593836118308001
2008056	19	0.180255840640787	0.457439686865919
2008056	20	0.133874652786754	0.366118421035642
2008056	21	0.126963056028563	0.422262749507704
2008056	22	0.162459451249309	0.657704789986125
2008056	23	0.123524884890278	0.649386696285457
2008057	0	0.0866030950945702	0.560992132626111
2008057	1	0.0994521950019937	0.755296473193018
2008057	2	0.0933726314876715	0.975823342720111
2008057	3	0.117510041928065	1.38093168559948
2008057	4	0.222764532282028	2.50906978056498
2008057	5	0.264410117462732	3.01593049720719
2008057	6	0.273230754721544	3.29918455414769
2008057	7	0.23961750928075	3.04634568304947
2008057	8	0.243320215422097	2.96629715209791
2008057	9	0.339140060045191	3.53451772844436
2008057	10	0.558813453632229	4.26325755465206
2008057	11	0.719528725563118	3.94840923665315
2008057	12	0.303323786309806	1.83904327746152
2008057	13	0.202158524881467	1.1910750048787
2008057	14	0.239290380849097	1.3185718641932
2008057	15	0.326686470927018	1.72388260005768
2008057	16	0.362200013117881	1.95966777515616
2008057	17	0.428435457383027	2.51412521529011
2008057	18	0.472785451765281	2.91619268164655
2008057	19	0.440157897585291	2.77540217447487
2008057	20	0.40494587356211	2.66737915402876
2008057	21	0.41643897707386	2.72261333263425
2008057	22	0.501905258261264	3.38217946917232
2008057	23	0.542695147684352	3.82125281713263
2008058	0	0.510942770862568	3.52532309261107
2008058	1	0.584615469812823	4.00927817260686
2008058	2	0.599999516170059	4.06050935577376
2008058	3	0.559872324478174	3.82564556492969
2008058	4	0.477238908916277	3.30354797947975
2008058	5	0.424757935638799	2.88493106395351
2008058	6	0.469807645652385	3.12638205947705
2008058	7	0.538310450422355	3.4353051912043
2008058	8	0.610895313456978	3.61510500027431
2008058	9	0.662676622110135	3.77410556233647
2008058	10	0.720586200214111	3.79956150281896
2008058	11	0.675260281321813	3.48978012262247
2008058	12	0.554081519957286	2.82238970260737
2008058	13	0.520370784783881	2.69731812789935
2008058	14	0.286268296350261	1.66417968138406
2008058	15	0.193557903155425	1.23218699970238
2008058	16	0.222253311402466	1.44409981222324
2008058	17	0.251804813023508	1.62911429692616
2008058	18	0.37452201291093	2.34531074335348
2008058	19	0.527886603594233	3.08965478453193
2008058	20	0.600829632092763	3.27072187604104
2008058	21	0.617972888271186	3.3127437802025
2008058	22	0.590239145376915	3.19462320936475
2008058	23	0.566245388261595	3.00999958973211
2008059	0	0.568860947652012	2.93673760761081
2008059	1	0.587179681339644	2.97947076052959
2008059	2	0.609108013623866	3.06706067531005
2008059	3	0.653549161288489	3.22329807571801
2008059	4	0.648222821357894	3.20587539100532
2008059	5	0.584620690264719	2.79066901165016
2008059	6	0.469702361484705	2.18502027199423
2008059	7	0.442328666348086	2.03842587046888
2008059	8	0.423826245180231	1.95135330723374
2008059	9	0.416045472638329	1.87062123212002
2008059	10	0.420074198225606	1.76498146417426
2008059	11	0.402163898927987	1.63224452105535
2008059	12	0.432412064132997	1.626965840829
2008059	13	0.488997920382964	1.6933968643535
2008059	14	0.547768458574202	1.79951301115522
2008059	15	0.587494060393874	1.89138156799229
2008059	16	0.585348942649944	1.87870954037427
2008059	17	0.470564094534357	1.70516386549081
2008059	18	0.4123698277971	1.51266205974026
2008059	19	0.374255281322658	1.45367752217852
2008059	20	0.321870351614383	1.36631824487544
2008059	21	0.328720328917084	1.4545542465616
2008059	22	0.351804765907178	1.64433721074479
2008059	23	0.351923990669912	1.70453665730301
2008060	0	0.333940824201775	1.63563078438586
2008060	1	0.32503552857068	1.54892615931763
2008060	2	0.331027196614504	1.57151712124147
2008060	3	0.3147526680748	1.54908615244703
2008060	4	0.343441863581519	1.7431989279296
2008060	5	0.321487906630839	1.68983495896132
2008060	6	0.314802320257986	1.68889491173161
2008060	7	0.301107858970672	1.57419747714315
2008060	8	0.241909890807404	1.30171506910832
2008060	9	0.251862431627058	1.5468918119204
2008060	10	0.278153799472221	1.8109368217038
2008060	11	0.372967606611812	2.23348431833293
2008060	12	0.384835284325598	2.24717242873254
2008060	13	0.376464904732194	2.21672606911149
2008060	14	0.351773784644831	1.94428832433507
2008060	15	0.269733285288053	1.41411348362934
2008060	16	0.259595282447639	1.25208353603858
2008060	17	0.249940872868923	1.0934964930616
2008060	18	0.227724904438714	1.04857022528674
2008060	19	0.18232973468874	1.07342428613406
2008060	20	0.0953414494541908	0.786324027672002
2008060	21	0.0835822972804167	0.84883967245747
2008060	22	0.0588600228915193	0.916344620300415
2008060	23	0.0971960670106725	1.50783780033436
