# Supplementary material for: A comparison of sea salt emission parameterizations in northwestern Europe using a chemistry transport model setup
Source: Copernicus journal article supplement (doi:10.5194/acp-16-9905-2016), 2016-08-08
Supplement: Supplementary file 2 [file acp-16-9905-2016-supplement.zip › conc/conc.timeseries.values.win2008.ov14.Na.DE0002R.csv]

doy	hour	pm2.5	pm10
2008001	0	0.169847525541105	0.670793383889195
2008001	1	0.171337600646977	0.79446764613518
2008001	2	0.158633327100741	0.779220762276643
2008001	3	0.15516919724801	0.75087291351286
2008001	4	0.149311764257092	0.724526569476009
2008001	5	0.150370582223707	0.712322338884324
2008001	6	0.161821850207002	0.758906162840672
2008001	7	0.1833404668763	0.801385654195282
2008001	8	0.213007097212773	0.81750989701606
2008001	9	0.241018845385	0.788055610636727
2008001	10	0.282843116119372	0.788862491010867
2008001	11	0.308534504267567	0.968256429915326
2008001	12	0.327089361975525	1.12731246318197
2008001	13	0.319379463483469	1.05716873020876
2008001	14	0.30395725982497	1.01371636282124
2008001	15	0.274873173468724	0.973989909206743
2008001	16	0.253437843130099	0.948464933332094
2008001	17	0.231370287856155	0.870355896213682
2008001	18	0.215309030341374	0.816327807293609
2008001	19	0.203835179443986	0.758763223506647
2008001	20	0.200767491207344	0.674511403436701
2008001	21	0.188794306488593	0.561126407181734
2008001	22	0.174769712367576	0.461144657846293
2008001	23	0.163422980793664	0.396564875036326
2008002	0	0.160097550514751	0.358441203977609
2008002	1	0.1528365874507	0.33098276196061
2008002	2	0.15499674873037	0.313320915645396
2008002	3	0.156370163508875	0.297607903520254
2008002	4	0.152190942422268	0.276526465655774
2008002	5	0.140625817306142	0.24981477046761
2008002	6	0.12931523366925	0.225847644649201
2008002	7	0.129910261647608	0.207030272501799
2008002	8	0.126242207971518	0.18146876541667
2008002	9	0.120572729799101	0.17204887220962
2008002	10	0.119320903022533	0.167161165545646
2008002	11	0.113453803815354	0.167760185011887
2008002	12	0.106249548484258	0.208144087533004
2008002	13	0.102894020639669	0.237281599067405
2008002	14	0.106098043189922	0.236804147201524
2008002	15	0.123162592832569	0.229276335582006
2008002	16	0.134574926001503	0.229771333980034
2008002	17	0.126001370617482	0.208456033624763
2008002	18	0.0514997450158602	0.126822192665358
2008002	19	0.0344375807167592	0.0860748863677981
2008002	20	0.0176610975079664	0.031924024730331
2008002	21	0.0110039065985518	0.016259349758333
2008002	22	0.00930855274824219	0.0133325004546346
2008002	23	0.00713746097194943	0.010167307144566
2008003	0	0.00474564203021681	0.00709995278056725
2008003	1	0.00396566869038026	0.00595885786571832
2008003	2	0.003995585944019	0.00638362330737914
2008003	3	0.0042627426352788	0.007283545118214
2008003	4	0.0043314828053212	0.00724284308994139
2008003	5	0.00353890591920436	0.00547262934498201
2008003	6	0.00277490494665787	0.00438843051186177
2008003	7	0.00274513865282991	0.00496551710909359
2008003	8	0.00297496530472642	0.00694964997549416
2008003	9	0.00685638348634645	0.0204510210063363
2008003	10	0.0105568834218079	0.0294940509558245
2008003	11	0.0106462323834668	0.027267454366595
2008003	12	0.0145946048394683	0.0348930740730524
2008003	13	0.018220903845202	0.0386072652541369
2008003	14	0.0151714685140727	0.0278464395975086
2008003	15	0.0123630013458682	0.0210565420404777
2008003	16	0.0116632770715687	0.0189184683157656
2008003	17	0.013842050513228	0.0210349761153436
2008003	18	0.0199970668187911	0.025934066336401
2008003	19	0.021595901791941	0.0301736405295817
2008003	20	0.0252853141927181	0.0416930249259666
2008003	21	0.0254408195253304	0.0440277319258255
2008003	22	0.0254683601551419	0.044311450314632
2008003	23	0.0267135342314822	0.0452697303738105
2008004	0	0.0267436359321887	0.0443272202205593
2008004	1	0.0263072057201819	0.0435133080831867
2008004	2	0.0263036108179015	0.0454433195734329
2008004	3	0.0274426238824991	0.0479232202412853
2008004	4	0.0297858544938343	0.0518458817461648
2008004	5	0.032678437836955	0.0580673269576551
2008004	6	0.0346071882627245	0.0627416521621758
2008004	7	0.0367952849602564	0.0688626679746119
2008004	8	0.0383769709306839	0.0743403954989661
2008004	9	0.0394181091511229	0.0774406723873013
2008004	10	0.0415658637394957	0.0775229208749414
2008004	11	0.0425697319003416	0.0733290529618015
2008004	12	0.0374304648229438	0.064920618217489
2008004	13	0.0319577458699623	0.0506731129507523
2008004	14	0.0299927855782151	0.0432186595952466
2008004	15	0.0278281786967437	0.0368470153481745
2008004	16	0.0257951541307428	0.0317460853031702
2008004	17	0.0238249393422954	0.0286466463338957
2008004	18	0.0217480830844252	0.0269591822964374
2008004	19	0.0205660148741368	0.0268418885397112
2008004	20	0.0205664466319334	0.0271691256760213
2008004	21	0.0199027273317208	0.0254854860421637
2008004	22	0.0192729135802817	0.0248387587366474
2008004	23	0.0228336061206982	0.0313564639225758
2008005	0	0.0300828765427765	0.0426600757666173
2008005	1	0.0370834834948807	0.0560958617381899
2008005	2	0.0437532838998911	0.0695325552351134
2008005	3	0.0482751804995763	0.0778235922849379
2008005	4	0.0527353534025352	0.0913495693722614
2008005	5	0.0628761276863971	0.125548063989505
2008005	6	0.0690079342115108	0.153444721668257
2008005	7	0.0694237049561393	0.15934204413262
2008005	8	0.0684391263808179	0.154851351543234
2008005	9	0.0685519245083048	0.142160724397737
2008005	10	0.062238011063498	0.129008225416976
2008005	11	0.0437487374417311	0.106575073535245
2008005	12	0.0431097672132645	0.0994842357192118
2008005	13	0.0425295050067175	0.084906034161162
2008005	14	0.041551321184274	0.07311866278196
2008005	15	0.0295227612076021	0.0487830544262943
2008005	16	0.0169808315242073	0.0303235128316721
2008005	17	0.0106919143618869	0.0235295321727041
2008005	18	0.0101808170989281	0.0298760770276963
2008005	19	0.0118351546842323	0.044432779307571
2008005	20	0.0149039172675831	0.0610965552939647
2008005	21	0.0186615552641918	0.0720034006343562
2008005	22	0.0197524444197831	0.083099023397093
2008005	23	0.0235446476195036	0.102448762380382
2008006	0	0.0275508420772516	0.121997147865648
2008006	1	0.0314919452583465	0.139582765147949
2008006	2	0.0348000370664521	0.152879466690946
2008006	3	0.0363603546665947	0.157738935359461
2008006	4	0.0358374038507255	0.154067255420165
2008006	5	0.0341907443295279	0.146039760875908
2008006	6	0.032485194714669	0.135285943177512
2008006	7	0.0304272770248853	0.122000254229062
2008006	8	0.028460534691814	0.109179040432792
2008006	9	0.0267900052380842	0.0980738052749957
2008006	10	0.0244263721113034	0.0885828365783391
2008006	11	0.0185374979373629	0.089105520329825
2008006	12	0.0296927013423309	0.169535109116335
2008006	13	0.0524190467058287	0.315241300688175
2008006	14	0.0654278950497421	0.381293881303287
2008006	15	0.0687578712175024	0.382667243075028
2008006	16	0.0675328035788618	0.364729877650773
2008006	17	0.0647274983337067	0.344231342682369
2008006	18	0.0618234883409049	0.325390339596506
2008006	19	0.0601614085803366	0.313481337620889
2008006	20	0.0595169453092726	0.310730149902469
2008006	21	0.0611437879648628	0.329794763261732
2008006	22	0.066401740137175	0.378548572987955
2008006	23	0.06754437165596	0.410656377591331
2008007	0	0.0801517973424276	0.4984085236335
2008007	1	0.0889123755850997	0.538560123299617
2008007	2	0.099407323373915	0.530646046089677
2008007	3	0.106082660939495	0.504604167025358
2008007	4	0.0945973718348166	0.477053340161809
2008007	5	0.0906117146914437	0.453629711284191
2008007	6	0.0968071563925884	0.440165047933425
2008007	7	0.0953426359422952	0.429122335384282
2008007	8	0.0975689213169443	0.393882621879065
2008007	9	0.0871097380487924	0.331974415428589
2008007	10	0.056959535336317	0.276314281404859
2008007	11	0.0165235540234615	0.104073474520224
2008007	12	0.0233002950140117	0.121751956463225
2008007	13	0.0143390677660992	0.0809611804810696
2008007	14	0.0306718167805274	0.125253156362284
2008007	15	0.0209480517480302	0.0732315665987484
2008007	16	0.031553045979461	0.150674211747038
2008007	17	0.00755012944563484	0.0425750147659848
2008007	18	0.00510255382919143	0.0418993555265068
2008007	19	0.00972481814681531	0.0635437124571138
2008007	20	0.0247710432142224	0.12745570515679
2008007	21	0.0493558662329002	0.216938592521021
2008007	22	0.0702603843865723	0.312957712234945
2008007	23	0.063761121673435	0.300809004740449
2008008	0	0.0433816290060174	0.176256171924687
2008008	1	0.0150120098071446	0.0594876169257776
2008008	2	0.0267333557681297	0.139025819055238
2008008	3	0.0348809440573046	0.221112886725859
2008008	4	0.0576310386488121	0.370783803244746
2008008	5	0.0749795985909775	0.405448618983412
2008008	6	0.0969361518505736	0.452792176975115
2008008	7	0.111325448672909	0.473887340687546
2008008	8	0.109719289995513	0.32459227389395
2008008	9	0.0592164652167278	0.125880028591829
2008008	10	0.0477073796466901	0.0989241369799629
2008008	11	0.0694778798728801	0.18461002150046
2008008	12	0.121077208877431	0.392498524516123
2008008	13	0.129093865899892	0.504589771540633
2008008	14	0.130838216978691	0.358989970195439
2008008	15	0.0944995555539398	0.319167045242498
2008008	16	0.138503050212584	0.576219536557189
2008008	17	0.136138221346698	0.5512121512782
2008008	18	0.114771511871471	0.535105076342401
2008008	19	0.143174557510091	0.642597839358189
2008008	20	0.192702974280918	0.756809575054412
2008008	21	0.243953960598808	0.857504171093982
2008008	22	0.207358637337353	0.866335614819484
2008008	23	0.178703546426264	0.873245749965609
2008009	0	0.17579253245446	0.879300909335659
2008009	1	0.167934891109852	0.855063624257404
2008009	2	0.166798863991997	0.859434840785891
2008009	3	0.199519284729863	0.857736002922209
2008009	4	0.21968409006003	0.786934698287381
2008009	5	0.181807855470057	0.556244888298962
2008009	6	0.161271877398237	0.478061057327293
2008009	7	0.15592349050541	0.431107399461984
2008009	8	0.144266515309289	0.365337129666305
2008009	9	0.124815778361723	0.316787988703311
2008009	10	0.109121889670245	0.316011185494483
2008009	11	0.139545505591903	0.432124181684925
2008009	12	0.116823717901134	0.36125083675334
2008009	13	0.059248400915671	0.202572406717175
2008009	14	0.0283117488576034	0.108516647946175
2008009	15	0.0212730463009189	0.0870053930648673
2008009	16	0.0228123837979576	0.0872067299707114
2008009	17	0.0215489941387665	0.0817518429323576
2008009	18	0.0241260404520981	0.0926642891243165
2008009	19	0.0250732743061662	0.089740338647605
2008009	20	0.0266983542290517	0.0896355622153237
2008009	21	0.0302415960947908	0.0898049795132042
2008009	22	0.0362421332329814	0.0925662056560169
2008009	23	0.0380979234759438	0.10791362921255
2008010	0	0.0456832909502387	0.185411473399655
2008010	1	0.0468352557767108	0.207271466556052
2008010	2	0.0493106543794936	0.187257943708895
2008010	3	0.0668997865223722	0.214074521862366
2008010	4	0.0856944513804509	0.264426397675208
2008010	5	0.0977361441692384	0.29987482086309
2008010	6	0.0959162102475011	0.305126601617463
2008010	7	0.0849634678271857	0.310863903092037
2008010	8	0.0928714758162861	0.42294008647087
2008010	9	0.0668598125498879	0.486145072892567
2008010	10	0.0644489813098275	0.346394212868994
2008010	11	0.0370833867338033	0.185452634220595
2008010	12	0.0239720236353452	0.138586123569327
2008010	13	0.0295914805688627	0.178277529392824
2008010	14	0.0283856799981062	0.162115015265522
2008010	15	0.0271781445461465	0.150516898775431
2008010	16	0.0268157554220797	0.133309287546841
2008010	17	0.023395841771914	0.0964935452594137
2008010	18	0.0144120879470073	0.0533434016714911
2008010	19	0.0142045830854251	0.0494976318399753
2008010	20	0.0152088311391334	0.0560337882338541
2008010	21	0.014830880490697	0.0549608906730072
2008010	22	0.0167877979545652	0.057773205827585
2008010	23	0.0180770269949047	0.0555796493132703
2008011	0	0.0152340523471442	0.0467596872015738
2008011	1	0.0104288012235675	0.0306369243285771
2008011	2	0.00915295972280176	0.0295398339884253
2008011	3	0.0105775226024012	0.0333853982999187
2008011	4	0.00942447286068422	0.0275946647089644
2008011	5	0.00606130016903499	0.0173126428791927
2008011	6	0.00207691599748555	0.0055638553899745
2008011	7	0.000911307036943238	0.00269748202222586
2008011	8	0.00119248499575729	0.00456318952471938
2008011	9	0.00205326282046734	0.00837798496572866
2008011	10	0.00591981816186303	0.0245734692487974
2008011	11	0.00587851678684085	0.0220725435314718
2008011	12	0.0053540604564537	0.0188402285206423
2008011	13	0.00602565040911507	0.0207650463720593
2008011	14	0.00434031657174766	0.0161671888994205
2008011	15	0.00283682815189416	0.00901488349626227
2008011	16	0.00155244334346343	0.00381577262881764
2008011	17	0.00104358522671928	0.0021149390251851
2008011	18	0.000909112558133761	0.00190218204051516
2008011	19	0.000923214058136375	0.00205069300725797
2008011	20	0.00114555363266704	0.00282198469110136
2008011	21	0.00148590732118461	0.00347174221672781
2008011	22	0.00477067086633467	0.0127245437158208
2008011	23	0.00911433123285702	0.0232043628598416
2008012	0	0.0101688485657149	0.0245807180857855
2008012	1	0.00838779510691096	0.0200247475022081
2008012	2	0.00571791229885129	0.0147209933612534
2008012	3	0.00441292653349365	0.0101745381868416
2008012	4	0.00354541952587395	0.0106917009863697
2008012	5	0.0153016029490322	0.0329118623678979
2008012	6	0.0386254107941185	0.0820478364501011
2008012	7	0.0471115610258853	0.13280104641248
2008012	8	0.0425329008167885	0.130689789930669
2008012	9	0.0651823629754566	0.183386586344029
2008012	10	0.136085682275885	0.323975215400825
2008012	11	0.15333165864925	0.364190568094833
2008012	12	0.132504610493788	0.278441795729448
2008012	13	0.110465871270244	0.207395944713242
2008012	14	0.100601073724181	0.189669147008862
2008012	15	0.0800902490596753	0.17800754123709
2008012	16	0.0702272511476941	0.17991921833217
2008012	17	0.0654694633845847	0.192464449952693
2008012	18	0.0603945786538204	0.205374988999243
2008012	19	0.056730125589666	0.210096876678601
2008012	20	0.054160280069239	0.228790027984908
2008012	21	0.0482353365608099	0.235780501717246
2008012	22	0.048617676198075	0.232197766548007
2008012	23	0.0553219637009992	0.22803474843677
2008013	0	0.0560317766823185	0.232232842502643
2008013	1	0.0558154387150195	0.24956427214249
2008013	2	0.0588239709349943	0.291806885813381
2008013	3	0.0768048371111655	0.387167182793211
2008013	4	0.107497493177116	0.489205668455056
2008013	5	0.140052713282709	0.534552168328432
2008013	6	0.144137743020694	0.544790182500532
2008013	7	0.151364789614725	0.55387929044894
2008013	8	0.159587919215224	0.562341164466952
2008013	9	0.166855612541278	0.590056393580952
2008013	10	0.18283425500839	0.638921577044083
2008013	11	0.190248052343339	0.612363223203047
2008013	12	0.179775562095579	0.542550603062722
2008013	13	0.16373358503354	0.493830037120296
2008013	14	0.143751506218659	0.46823361779738
2008013	15	0.129645609894902	0.445633886426673
2008013	16	0.120046854639158	0.425337613179008
2008013	17	0.113951514867373	0.403184765670898
2008013	18	0.101295598207171	0.380104512230203
2008013	19	0.0906918700075977	0.364510254562673
2008013	20	0.0813825709611294	0.359677405158658
2008013	21	0.0761756087744797	0.349172435108628
2008013	22	0.076260328318024	0.335868333731972
2008013	23	0.0725755241186347	0.325334146526091
2008014	0	0.072473910424231	0.313799525884304
2008014	1	0.0664554400479149	0.302042759689974
2008014	2	0.0643885706070332	0.291227398079987
2008014	3	0.0630977772540248	0.277517105722128
2008014	4	0.0603620005038381	0.25698164375237
2008014	5	0.0588509323214902	0.24141071557255
2008014	6	0.0555314470264449	0.235510796720917
2008014	7	0.0576408519869247	0.206951175355491
2008014	8	0.0564016652360843	0.19498197650034
2008014	9	0.0545420677198192	0.19117904925094
2008014	10	0.0632084312006052	0.194842391960054
2008014	11	0.067126551996726	0.182492656511072
2008014	12	0.0649061093353468	0.162869983251106
2008014	13	0.0688840019308499	0.17966814392848
2008014	14	0.0843987698020076	0.22300350506744
2008014	15	0.0758104348967264	0.210145706773914
2008014	16	0.0644702620059138	0.186744104869309
2008014	17	0.0553686339414822	0.165901418361248
2008014	18	0.0523756340524261	0.152364481417688
2008014	19	0.0516949743589612	0.146025117052098
2008014	20	0.0568528729729967	0.163073755894113
2008014	21	0.0617930665525739	0.180695802225362
2008014	22	0.0663339393347553	0.180620689358152
2008014	23	0.0612707752089599	0.164342653794906
2008015	0	0.0549040383443956	0.144173507919754
2008015	1	0.0484918069684701	0.127712312344034
2008015	2	0.0414004132332174	0.115091724509742
2008015	3	0.0382327863493355	0.115332635771841
2008015	4	0.0414939766530231	0.130092584424718
2008015	5	0.0366345080457387	0.123427341607186
2008015	6	0.0309883514753966	0.103668466125526
2008015	7	0.0278374246781099	0.0969678996177401
2008015	8	0.0310073246701116	0.107708617837155
2008015	9	0.0529375974487086	0.165263440269091
2008015	10	0.0660861505239535	0.176945460775204
2008015	11	0.0818886904703496	0.202223479089356
2008015	12	0.0806668535597097	0.208782426969742
2008015	13	0.0645080111687933	0.184711910197803
2008015	14	0.0651280755536311	0.183379978041562
2008015	15	0.0360829939353618	0.0972462309705391
2008015	16	0.0309522416207633	0.0835809745794443
2008015	17	0.0404585827430876	0.0953210981772198
2008015	18	0.0601176509370944	0.110642000334651
2008015	19	0.0645647086222468	0.10849663426056
2008015	20	0.0806497290429487	0.131229035792165
2008015	21	0.0920079688482307	0.148712600304971
2008015	22	0.0879913438964258	0.141159933590542
2008015	23	0.0605514156112849	0.0967860287142436
2008016	0	0.0136726842102585	0.0332368809336484
2008016	1	0.0042137232487794	0.0102097160795144
2008016	2	0.00354584685274352	0.0091514860850448
2008016	3	0.00343527598210579	0.00882142613137499
2008016	4	0.00263854243405336	0.00665744493925346
2008016	5	0.00212294390106449	0.00575942973514715
2008016	6	0.00302992231504073	0.0102481698466137
2008016	7	0.00441528203674367	0.0175770056077887
2008016	8	0.00475241571114552	0.0209946597857077
2008016	9	0.00771996366449725	0.0364994886051556
2008016	10	0.0208130526711394	0.0913200653581803
2008016	11	0.0278856829023055	0.111913308475332
2008016	12	0.0298110106170449	0.107630033279479
2008016	13	0.0274349794020269	0.0851961579923836
2008016	14	0.0272647970276277	0.0725364464682866
2008016	15	0.0272302906956156	0.0647678727045509
2008016	16	0.0250197309454578	0.0567441749097004
2008016	17	0.0236083092237692	0.0496935802108584
2008016	18	0.0217190040528278	0.0422814765735347
2008016	19	0.020646919900278	0.0379432829194278
2008016	20	0.0254666816345519	0.0453330451701095
2008016	21	0.031462177063185	0.0628379200733752
2008016	22	0.0416164280098952	0.0973496420912741
2008016	23	0.058049544038075	0.156006782359519
2008017	0	0.0593363211873436	0.166402681517047
2008017	1	0.0558910513032151	0.151577215458574
2008017	2	0.0496328272660978	0.129634678355959
2008017	3	0.0367050014526313	0.0977266049044442
2008017	4	0.0215119927543977	0.0577349077019455
2008017	5	0.011767107524212	0.0313706163433062
2008017	6	0.0122299313643936	0.0308529833763774
2008017	7	0.0141038012003331	0.0343184642334334
2008017	8	0.0148159767960335	0.0353092274960514
2008017	9	0.0164919328909427	0.0406557571881821
2008017	10	0.0209142022324641	0.0520866304036371
2008017	11	0.021498133856851	0.0547799823373506
2008017	12	0.0258611212386422	0.0714725502270191
2008017	13	0.0558759223858466	0.146883554275921
2008017	14	0.158141879575905	0.360256618536039
2008017	15	0.156985763227004	0.33973999653265
2008017	16	0.0962606277381666	0.208124107791104
2008017	17	0.0898056847088455	0.19682696132513
2008017	18	0.0996331478129498	0.227626419549019
2008017	19	0.0951397474830652	0.235177656137886
2008017	20	0.0688969974822341	0.202240016815623
2008017	21	0.0208423363593559	0.0521180039865969
2008017	22	0.0375188890201625	0.0590975359839657
2008017	23	0.0326118091373858	0.0721730926295276
2008018	0	0.0161954417248247	0.0532290046751695
2008018	1	0.0276246388190909	0.135171324954338
2008018	2	0.0134894009769186	0.0809967021314624
2008018	3	0.00135983067371812	0.00938889795883134
2008018	4	0.0130801679625616	0.0961293618587315
2008018	5	0.0406844808720627	0.24811351385456
2008018	6	0.0181280499225565	0.0916580559633862
2008018	7	0.00699590431291652	0.0383408736967129
2008018	8	0.0240736829033896	0.198861244307166
2008018	9	0.0346149390364624	0.284539484160728
2008018	10	0.0328212150046791	0.237847795860314
2008018	11	0.0368426403591083	0.201363954359597
2008018	12	0.0496431374279547	0.223324285146195
2008018	13	0.0597826137114127	0.238721740733452
2008018	14	0.0981116899857397	0.307691432061301
2008018	15	0.15139967664817	0.389224761187532
2008018	16	0.118759173875051	0.296793548343246
2008018	17	0.0733921434670541	0.231644457502885
2008018	18	0.0658760993918833	0.185998239421532
2008018	19	0.0580227212422552	0.15006918474469
2008018	20	0.0456477783540888	0.105407903511638
2008018	21	0.0644831747786145	0.142762948425082
2008018	22	0.0290243483499781	0.0629175895208868
2008018	23	0.0575221912061724	0.175371879104552
2008019	0	0.0828975487721404	0.337344825749453
2008019	1	0.097854967927635	0.47179726757262
2008019	2	0.115744866406634	0.653637747323753
2008019	3	0.0586343522170412	0.315286193482334
2008019	4	0.0714473064873688	0.344334922372665
2008019	5	0.0597374441447143	0.244795541623409
2008019	6	0.026852911836241	0.113200194444272
2008019	7	0.00581149559079047	0.032204039839005
2008019	8	0.00270759047621672	0.0165418253250796
2008019	9	0.00218995452886558	0.0162953498355113
2008019	10	0.00818229900344388	0.0624139326993122
2008019	11	0.0377775045504372	0.203877991258733
2008019	12	0.0847371137896455	0.393907618846476
2008019	13	0.11804825113165	0.505993344363585
2008019	14	0.134323359237364	0.514461923723475
2008019	15	0.165117387576147	0.591438985484342
2008019	16	0.17340109879757	0.623095193281679
2008019	17	0.170619791942285	0.586512409542475
2008019	18	0.15790478576232	0.52083317907116
2008019	19	0.150048696094117	0.478831794518402
2008019	20	0.152249766753202	0.474247882571666
2008019	21	0.156361154744469	0.481754850808404
2008019	22	0.155692763851845	0.481571015043067
2008019	23	0.150955715345354	0.487325529317779
2008020	0	0.146498296744471	0.492683414106001
2008020	1	0.145217379158788	0.496221266407771
2008020	2	0.144114145081933	0.501060701421575
2008020	3	0.140509354427806	0.512875171964267
2008020	4	0.13478863419227	0.517712901920311
2008020	5	0.124955013895747	0.505818311114966
2008020	6	0.118375998735908	0.514698507148543
2008020	7	0.0724818684541342	0.338141123815065
2008020	8	0.0288190710851147	0.119191711522194
2008020	9	0.00702581282729037	0.0304215397824078
2008020	10	0.0012372161079815	0.00462274702423718
2008020	11	0.000269245653715872	0.000773288959577111
2008020	12	0.000176537395456566	0.000413224921748681
2008020	13	0.000163608345382588	0.000343668302457855
2008020	14	0.000161947917659074	0.000312503527349518
2008020	15	0.000525155137062782	0.00195539592962814
2008020	16	0.00681365713317052	0.0275668251835623
2008020	17	0.0156757066194898	0.0616116892423769
2008020	18	0.0178020368190177	0.066056373002859
2008020	19	0.0141649289924927	0.0568485030248461
2008020	20	0.00944065432417042	0.0482274060799136
2008020	21	0.00722656498998538	0.0432597089793165
2008020	22	0.00661139082926322	0.0423278042482283
2008020	23	0.00586737964385653	0.0368540229959188
2008021	0	0.00414250750311787	0.0286702704424963
2008021	1	0.000181850595934886	0.00110102482222845
2008021	2	5.66687039979808e-05	8.40619415697012e-05
2008021	3	5.95071638707785e-05	8.56673652513024e-05
2008021	4	7.34208997347475e-05	0.000165034747511814
2008021	5	7.02737986179545e-05	0.000146901173850414
2008021	6	6.98236200925986e-05	0.000192388861548955
2008021	7	0.000233405533709049	0.00132130484663381
2008021	8	0.00116586435895044	0.00851570456611849
2008021	9	0.00187086171385822	0.0149884846512972
2008021	10	0.000402083763268747	0.00326311541863106
2008021	11	0.000112482473322084	0.000571421466526085
2008021	12	5.88089171082974e-05	0.000159887216840009
2008021	13	4.30898198361671e-05	6.63055066017773e-05
2008021	14	3.76685055166584e-05	4.59027811399197e-05
2008021	15	0.000218139541585719	0.000904706395560581
2008021	16	0.000862373194615999	0.00293722181587282
2008021	17	0.0131673630194009	0.0394161372992937
2008021	18	0.0343587778895797	0.107590908275875
2008021	19	0.0222688596800516	0.0769760816606944
2008021	20	0.0173998609228356	0.0669437541491497
2008021	21	0.00786394064360681	0.0333213350916337
2008021	22	0.00251449548031697	0.0121153187076826
2008021	23	0.00135219937431695	0.00760918738119201
2008022	0	0.0012702404250872	0.00828886965774808
2008022	1	0.00325804971621292	0.0183995995753272
2008022	2	0.0422457744050145	0.203764336225956
2008022	3	0.0909735956687368	0.536673918598469
2008022	4	0.15743915272571	0.725436312837188
2008022	5	0.244933518306064	0.900461919710585
2008022	6	0.318863117460576	1.16584359499899
2008022	7	0.336075493481494	1.21136584622898
2008022	8	0.321177666593141	1.25924943984862
2008022	9	0.388211001330342	1.5255222371374
2008022	10	0.48115394194601	1.65408797341735
2008022	11	0.524237794311253	1.57378381168063
2008022	12	0.47220707695424	1.39063328919716
2008022	13	0.411550432285333	1.23102785064678
2008022	14	0.321980825404143	1.16494520650247
2008022	15	0.272207195415415	1.14515383049553
2008022	16	0.226956478641697	1.08378406160689
2008022	17	0.188767372981224	0.982758714154343
2008022	18	0.14166533474001	0.850508859102964
2008022	19	0.114850352389715	0.729953346444718
2008022	20	0.0981317703439623	0.641480266108871
2008022	21	0.0908797958924778	0.599958129438799
2008022	22	0.0886969032139326	0.590881460738977
2008022	23	0.0853660703675033	0.606620342245519
2008023	0	0.100729615913067	0.722056963648936
2008023	1	0.132330531214514	0.889211434516787
2008023	2	0.14446186071875	0.968831969265619
2008023	3	0.158743192242994	1.02661419667298
2008023	4	0.164315934932039	1.00863448947465
2008023	5	0.161685413650163	0.935155961108356
2008023	6	0.165358071912206	0.85091034184367
2008023	7	0.164060190845132	0.775470046211141
2008023	8	0.156773473118349	0.735572533193804
2008023	9	0.240304429813335	0.781588074032263
2008023	10	0.299249688184001	0.81904408275618
2008023	11	0.281994960680777	0.715667105773724
2008023	12	0.20635129014542	0.510502267585342
2008023	13	0.15575391214042	0.382584791042299
2008023	14	0.121619706234396	0.295879373231525
2008023	15	0.104435053430935	0.257573681782505
2008023	16	0.101958532901179	0.261245091724694
2008023	17	0.0893989680404103	0.228187149556884
2008023	18	0.0325618099507225	0.0893169163350782
2008023	19	0.00612033686266506	0.0244237162046727
2008023	20	0.0169919741981454	0.0855579182265434
2008023	21	0.0637726085500044	0.311766507531237
2008023	22	0.0805120838161608	0.379271279200933
2008023	23	0.0815782531576933	0.385551934975377
2008024	0	0.0807380842660864	0.39233085315199
2008024	1	0.077730885823912	0.390777012670924
2008024	2	0.0747734530611019	0.400910174646601
2008024	3	0.0772512321860287	0.442894840310427
2008024	4	0.0873809122628272	0.502016582011978
2008024	5	0.0896786056926038	0.467977200437399
2008024	6	0.0767082486602974	0.358022582198097
2008024	7	0.0739479469698609	0.305384833251327
2008024	8	0.0832098923114991	0.325405316313618
2008024	9	0.0951994018550108	0.396522271899185
2008024	10	0.110551025223294	0.471147929573913
2008024	11	0.109775960302048	0.432126896666286
2008024	12	0.0687524836566174	0.26940769285303
2008024	13	0.0290344401895769	0.148165358495319
2008024	14	0.06007402843239	0.291011624147596
2008024	15	0.106133793790899	0.469268223518422
2008024	16	0.139769721511476	0.576761402524746
2008024	17	0.139232047475022	0.548095064028894
2008024	18	0.114160622505159	0.482091118924715
2008024	19	0.099967104533058	0.497287010369734
2008024	20	0.10816775934704	0.599121173069334
2008024	21	0.124623965377641	0.69490673862404
2008024	22	0.124975655070558	0.691695647286614
2008024	23	0.144779079217069	0.722102194765644
2008025	0	0.142896658313769	0.654436322263753
2008025	1	0.158754278057238	0.623456766349851
2008025	2	0.151970289922799	0.595456630272259
2008025	3	0.156380154595935	0.559375696445056
2008025	4	0.13670958627966	0.526318959586786
2008025	5	0.13186412383745	0.516973806922847
2008025	6	0.107070678879379	0.435960104720545
2008025	7	0.0704632671109296	0.316905258688157
2008025	8	0.0629069869179049	0.290738235125411
2008025	9	0.0784624865437027	0.309868941942337
2008025	10	0.103551498012998	0.387344202698602
2008025	11	0.157068600237472	0.507346277659643
2008025	12	0.192385327601134	0.542844701302544
2008025	13	0.214807266343965	0.608566230274139
2008025	14	0.213843138004465	0.646985411693501
2008025	15	0.216984465442369	0.687229391622642
2008025	16	0.215622629655345	0.707491779221806
2008025	17	0.209232053110283	0.696260198786455
2008025	18	0.195933622997878	0.650749723931723
2008025	19	0.16857388360904	0.610965002865438
2008025	20	0.151171708673594	0.587268597962393
2008025	21	0.136807931424941	0.567021855285319
2008025	22	0.12666305511206	0.527207002969424
2008025	23	0.115204661774707	0.496425877083345
2008026	0	0.113192600001503	0.475829819636521
2008026	1	0.110605583499717	0.448653098358645
2008026	2	0.111216651472707	0.450711086163748
2008026	3	0.115182801653568	0.480185166606117
2008026	4	0.126434273926462	0.546172816284655
2008026	5	0.134039353024435	0.583012287427839
2008026	6	0.136486313840215	0.593039451166077
2008026	7	0.140473408239401	0.616655555232891
2008026	8	0.151481400457493	0.697429371197319
2008026	9	0.168628474329612	0.825698507613964
2008026	10	0.175856890576972	0.866038293072293
2008026	11	0.171477309265637	0.827103850068811
2008026	12	0.16299103767091	0.810203812357612
2008026	13	0.1480719154805	0.797181391880564
2008026	14	0.13226951875309	0.837863437622182
2008026	15	0.114984278366002	0.828194660885512
2008026	16	0.106391843974662	0.75279601836546
2008026	17	0.119798238805813	0.798882928751185
2008026	18	0.170357115524253	1.01454870243271
2008026	19	0.212516121325201	1.16141450151573
2008026	20	0.210191335681838	1.16784698378611
2008026	21	0.237497338220722	1.42342303287564
2008026	22	0.235627200022844	1.36279092727253
2008026	23	0.23058179039292	1.28026715478374
2008027	0	0.231362614010626	1.25864451598398
2008027	1	0.210406712688934	1.1729139763805
2008027	2	0.177709961716674	1.02214078035003
2008027	3	0.156976845707277	0.795260885116607
2008027	4	0.0804972300276902	0.324994356760665
2008027	5	0.0313779564190359	0.113313795697941
2008027	6	0.00986001613460937	0.0370769768825519
2008027	7	0.00608295286317368	0.0237739116241118
2008027	8	0.00582247477273241	0.0214339674007401
2008027	9	0.00552484968189978	0.017813905857111
2008027	10	0.00446483981469032	0.012100131329657
2008027	11	0.00325885237527661	0.00833940694246238
2008027	12	0.00619074200777587	0.0189088333693717
2008027	13	0.030638214325964	0.0935918827163462
2008027	14	0.0572974320781147	0.147767532382316
2008027	15	0.0585288025608189	0.138695938128925
2008027	16	0.0863246288507174	0.211900506380614
2008027	17	0.128609908387936	0.304219723971379
2008027	18	0.177791943302788	0.35820105714037
2008027	19	0.200336622196284	0.379804456300359
2008027	20	0.214587651502625	0.399766019733332
2008027	21	0.240850091728497	0.470439735370666
2008027	22	0.3004117694193	0.675130941507256
2008027	23	0.375697559919984	0.982645659576085
2008028	0	0.420783919500545	1.34655275656135
2008028	1	0.47060645858484	1.75861410811868
2008028	2	0.493037303137003	2.01545317103437
2008028	3	0.505450197039086	2.13804231797335
2008028	4	0.475807907305945	2.03614313662486
2008028	5	0.402917292311805	1.75614165869829
2008028	6	0.387142968351252	1.78558649191664
2008028	7	0.416483829902307	1.92007287737576
2008028	8	0.414389072697025	1.88235171770816
2008028	9	0.392668625488793	1.68756030499906
2008028	10	0.33149383098077	1.42353638523363
2008028	11	0.382816953498828	1.25534336271604
2008028	12	0.407552800460572	1.07158811347954
2008028	13	0.394312904979922	0.914766751339188
2008028	14	0.382110509034835	0.80554502862313
2008028	15	0.351427044296884	0.684430070165335
2008028	16	0.27426120307963	0.610735211898419
2008028	17	0.258747408995053	0.606505425705862
2008028	18	0.272553766191678	0.790183381878732
2008028	19	0.262010292160814	1.12643570060555
2008028	20	0.186838197481547	1.25866805178815
2008028	21	0.20629582312139	1.31600606367636
2008028	22	0.18513973787699	1.16653446157105
2008028	23	0.171407984753476	1.23154044625778
2008029	0	0.194890901283433	1.54983161375654
2008029	1	0.188267135739796	1.55332644116582
2008029	2	0.176058518512826	1.45689143231983
2008029	3	0.155811796700352	1.31151192295085
2008029	4	0.140505644254908	1.2580435445225
2008029	5	0.144426103781343	1.29027140294146
2008029	6	0.119180837475005	1.0129127242574
2008029	7	0.10121647537145	0.845049684833346
2008029	8	0.122897445432276	0.795080332555018
2008029	9	0.133597054939447	0.72381473863611
2008029	10	0.143376051375835	0.659252986278394
2008029	11	0.148714383369534	0.58946490942929
2008029	12	0.146338127876437	0.544543107908946
2008029	13	0.136587398387732	0.54488728039346
2008029	14	0.130706320595553	0.600027699488368
2008029	15	0.123609582074726	0.629069720097363
2008029	16	0.113132283163993	0.602015748968171
2008029	17	0.103228817960317	0.53607580846664
2008029	18	0.0959717367569371	0.480854791684546
2008029	19	0.0985242570982816	0.456577070087412
2008029	20	0.0964414305886403	0.455372927137294
2008029	21	0.0933250463270502	0.470639273655594
2008029	22	0.140809323796503	0.661548019076879
2008029	23	0.179216813691014	0.825509644350778
2008030	0	0.221849745798067	0.954447123385725
2008030	1	0.23404689577574	0.97390444845778
2008030	2	0.237077857376702	0.936159900414745
2008030	3	0.22487945958791	0.876554264191025
2008030	4	0.208519753141684	0.810206544630336
2008030	5	0.1864947919956	0.729159171486991
2008030	6	0.159892066649534	0.644062846391264
2008030	7	0.138881937105006	0.579062169883649
2008030	8	0.136099725020083	0.561418872533319
2008030	9	0.141337516273806	0.577492416128662
2008030	10	0.134425340327816	0.558257612297628
2008030	11	0.0823849322593998	0.452095965966576
2008030	12	0.0586310617722627	0.262096829799196
2008030	13	0.036288466316056	0.168379489702943
2008030	14	0.0670678553631176	0.2919390606117
2008030	15	0.0944392963836305	0.331462900357622
2008030	16	0.117963568154073	0.354302243571869
2008030	17	0.149740057059874	0.49529850493354
2008030	18	0.288173517147759	1.01948465372611
2008030	19	0.377910255887574	1.52847420996699
2008030	20	0.321259931961497	1.50723002086995
2008030	21	0.255851830192733	1.34719683623747
2008030	22	0.188039386220326	1.00174148870693
2008030	23	0.144257204054826	0.753813561069195
2008031	0	0.141572876555992	0.69794486817358
2008031	1	0.129769216234988	0.650639608325355
2008031	2	0.145125262571912	0.629356537837738
2008031	3	0.143326789466698	0.62511526242205
2008031	4	0.142798962101753	0.637989700074139
2008031	5	0.147135775371471	0.635674054220946
2008031	6	0.146485435246265	0.62549049165439
2008031	7	0.152133254490763	0.643933543252278
2008031	8	0.209893103323832	0.659046847599127
2008031	9	0.239960214862844	0.587068598241627
2008031	10	0.208092146697061	0.47413018091596
2008031	11	0.178546415524767	0.418227753176069
2008031	12	0.184576021641177	0.397567305690902
2008031	13	0.166032720690758	0.308378700479349
2008031	14	0.144486159524525	0.243168979583345
2008031	15	0.114266947813642	0.187874892023719
2008031	16	0.0910607635419208	0.149730253543526
2008031	17	0.0741735094237985	0.130236464526149
2008031	18	0.0576282322682369	0.13524917637802
2008031	19	0.0536992135418559	0.152963408508104
2008031	20	0.0477885333775165	0.13651431932423
2008031	21	0.0405337306956875	0.103786387623499
2008031	22	0.0287252464058053	0.0738856344310579
2008031	23	0.0197948892638779	0.0675919006003746
2008032	0	0.0196155595620394	0.0971556341630267
2008032	1	0.0205195328259341	0.112318909799127
2008032	2	0.0281780739166936	0.134828997272478
2008032	3	0.0487895664946175	0.205173334513351
2008032	4	0.0785780738305444	0.290471915421857
2008032	5	0.0937321826295768	0.312599922943979
2008032	6	0.106019303130619	0.334726232050295
2008032	7	0.0996146823398456	0.297133970966231
2008032	8	0.0935888063511092	0.264628724945403
2008032	9	0.0942769025441335	0.277150954003872
2008032	10	0.10000370421569	0.312290182442375
2008032	11	0.0950580160498343	0.306745748615289
2008032	12	0.0910088401144008	0.310744783991463
2008032	13	0.0955534309036068	0.349397888850766
2008032	14	0.110278346079678	0.414903319839347
2008032	15	0.112902688944851	0.401679619617116
2008032	16	0.110928398997859	0.348349332025453
2008032	17	0.0985680150916486	0.283073390824903
2008032	18	0.110500296777782	0.317336353101159
2008032	19	0.132861175385261	0.3676283243044
2008032	20	0.151381495186646	0.396299582161351
2008032	21	0.139174973988619	0.391509862371814
2008032	22	0.137978963888291	0.482735125880273
2008032	23	0.13876515796327	0.544180315753853
2008033	0	0.142161399330335	0.496048629099856
2008033	1	0.0829479829564454	0.400838334814814
2008033	2	0.157461677406897	1.4006493381265
2008033	3	0.182561240432719	1.22359585164062
2008033	4	0.13439005966935	0.80153296714718
2008033	5	0.0999968512038595	0.777072510665308
2008033	6	0.115636578298523	0.806700663588049
2008033	7	0.224162620378574	1.26298809729293
2008033	8	0.361255312405677	1.88317344448552
2008033	9	0.383126435183792	1.87200499070129
2008033	10	0.362766361185535	1.67836106294803
2008033	11	0.307335633330572	1.37226195528617
2008033	12	0.302964995375254	1.31190723025894
2008033	13	0.317991166523566	1.34768283499362
2008033	14	0.305540543168951	1.28054537569102
2008033	15	0.297284442274151	1.19085865546593
2008033	16	0.225899205459178	0.868580657772157
2008033	17	0.169182769046798	0.639079974002758
2008033	18	0.146913702777535	0.542655258658715
2008033	19	0.225205184874346	0.68462062887246
2008033	20	0.331949512508082	0.652165713829555
2008033	21	0.250697014759174	0.460968626075532
2008033	22	0.224864578011101	0.408418714692605
2008033	23	0.237971860561069	0.42954052394591
2008034	0	0.26609614495298	0.508135197729109
2008034	1	0.299809424819215	0.592802475477308
2008034	2	0.302648436468593	0.60609989029226
2008034	3	0.288582870071387	0.569428011654585
2008034	4	0.253019851597216	0.471094563520374
2008034	5	0.201694440325468	0.362280585954105
2008034	6	0.177895821809716	0.320291938556928
2008034	7	0.168755623903018	0.303728387559608
2008034	8	0.15196253384384	0.288845578646348
2008034	9	0.169244307527631	0.34945887999326
2008034	10	0.22225944979917	0.437237967680415
2008034	11	0.193032533307763	0.364558842023296
2008034	12	0.174824072440127	0.279612270246088
2008034	13	0.132075738438451	0.19769186961438
2008034	14	0.119259483902743	0.183337771190136
2008034	15	0.129907789238433	0.200230113737841
2008034	16	0.112059921554074	0.165885129041264
2008034	17	0.0794783108750417	0.11868041209972
2008034	18	0.089663253867166	0.138661867079722
2008034	19	0.0853574378312644	0.130467096955569
2008034	20	0.0783758286540495	0.120122629023826
2008034	21	0.070797580696573	0.104206776920432
2008034	22	0.0613212573218417	0.0877689635049472
2008034	23	0.0569659255483348	0.0800725498182922
2008035	0	0.0555473616136408	0.0776792513908089
2008035	1	0.055217573420774	0.0766684082962523
2008035	2	0.0547982214921614	0.0761265999850418
2008035	3	0.0548729858374959	0.0758626817391111
2008035	4	0.0549741517218861	0.0757373915163397
2008035	5	0.0556074518421892	0.0778592989305483
2008035	6	0.060978102929964	0.0922700776088134
2008035	7	0.0656982871007262	0.105623391985013
2008035	8	0.0779692331250031	0.129958376700092
2008035	9	0.0860812971790122	0.147784845868685
2008035	10	0.0901025554835089	0.159607608071929
2008035	11	0.0899517840467183	0.16102633135917
2008035	12	0.0852449289398586	0.159982590547166
2008035	13	0.0807517905028032	0.160233565673731
2008035	14	0.0793367002891324	0.155595107092388
2008035	15	0.0740128914584616	0.132376995544515
2008035	16	0.0462370100820891	0.081808888277432
2008035	17	0.0197725008320752	0.0428571477960326
2008035	18	0.0121058362748333	0.0313827699785347
2008035	19	0.00875985306469019	0.0258171317965641
2008035	20	0.011594418250991	0.036684012733563
2008035	21	0.0126657281127908	0.0378590357348498
2008035	22	0.0139303835601434	0.0420706852951118
2008035	23	0.0157304477941179	0.0478910734928494
2008036	0	0.0176493015122137	0.0535447137765626
2008036	1	0.0212964295690606	0.0624944102515669
2008036	2	0.0271328627691896	0.0637207774269715
2008036	3	0.0354977087764015	0.0802115389364946
2008036	4	0.0515810032695951	0.12329506715032
2008036	5	0.0766294423495011	0.203520275642921
2008036	6	0.0775266434550388	0.221168134444881
2008036	7	0.081496045067209	0.255774243223383
2008036	8	0.100399954819831	0.297656822274682
2008036	9	0.102849367616743	0.292947010500513
2008036	10	0.0991638693671399	0.250470698709858
2008036	11	0.072610814375186	0.19832162641593
2008036	12	0.0533265189986859	0.186843943724794
2008036	13	0.0648387353210312	0.244824464203396
2008036	14	0.0861966463936236	0.323027161747052
2008036	15	0.0608277455746661	0.209089948436895
2008036	16	0.0556805895777496	0.144576620174111
2008036	17	0.0378099006791155	0.080177574831748
2008036	18	0.0162606822937384	0.0334613824393728
2008036	19	0.00650090669683802	0.0143114104570073
2008036	20	0.00570909358656755	0.0135353011977828
2008036	21	0.0150452548672778	0.0383124256456754
2008036	22	0.0261703194627311	0.0565172131480227
2008036	23	0.0257493511517814	0.0534069327260972
2008037	0	0.0021015821880232	0.00398223598336348
2008037	1	0.002326612060897	0.0095850420670178
2008037	2	0.0130014234897248	0.0699643513469408
2008037	3	0.0601540250691217	0.384719642286497
2008037	4	0.0705596889723224	0.448238783227291
2008037	5	0.0595920586877922	0.321403078504622
2008037	6	0.0164055460665617	0.0849736169305729
2008037	7	0.00991549311071339	0.0596965942011865
2008037	8	0.0342440168444333	0.182153896812298
2008037	9	0.0241368874656457	0.138860293046314
2008037	10	0.00459540070687975	0.0197451005464902
2008037	11	0.0625214385231334	0.338192964039763
2008037	12	0.237092030743295	1.02117194326838
2008037	13	0.229140153321583	1.0362224167347
2008037	14	0.204802302954589	0.937305316611787
2008037	15	0.210230895250574	1.00698437247406
2008037	16	0.2116065274869	1.10265013454305
2008037	17	0.243267664511848	1.37205106329897
2008037	18	0.263671043018563	1.51588304067332
2008037	19	0.263814552273106	1.58286706283871
2008037	20	0.223634830532795	1.29155231597204
2008037	21	0.21472457340414	1.15892060869114
2008037	22	0.246470441324036	1.40731120395851
2008037	23	0.236974259883625	1.45232321579961
2008038	0	0.234840624871633	1.46785250125232
2008038	1	0.209380962870228	1.28171695257143
2008038	2	0.179829320292142	1.12584040043019
2008038	3	0.157898967712825	1.10062601930374
2008038	4	0.153473596676654	1.13010943346614
2008038	5	0.14917436158226	1.20367987536463
2008038	6	0.155939788459919	1.32488788891545
2008038	7	0.161804155049999	1.36398306497036
2008038	8	0.165643887262486	1.21776904524136
2008038	9	0.171709539480402	1.13750922123416
2008038	10	0.238574132999638	1.11144466669383
2008038	11	0.321186045024366	1.00874349102725
2008038	12	0.31054156020644	0.769883323363027
2008038	13	0.302751643520751	0.691969786529482
2008038	14	0.292001513101528	0.705867988524358
2008038	15	0.268451806391648	0.696223872784046
2008038	16	0.23812740845256	0.680399917303114
2008038	17	0.219236015154795	0.657573491916332
2008038	18	0.215116910703491	0.658872933009228
2008038	19	0.231289410349543	0.69695619877471
2008038	20	0.240387784308335	0.709237947714999
2008038	21	0.242521716939661	0.692692012632268
2008038	22	0.238306412633323	0.676056515283314
2008038	23	0.229015115804847	0.653382413106868
2008039	0	0.229906038661215	0.628500204348391
2008039	1	0.229817875398906	0.621983639622937
2008039	2	0.235100746351603	0.639378691499402
2008039	3	0.245161734916424	0.672276554896075
2008039	4	0.254601142715161	0.698327502127362
2008039	5	0.261108345897118	0.702837668534336
2008039	6	0.258242699529481	0.686344044330412
2008039	7	0.242104923238952	0.651352705852719
2008039	8	0.221488500018836	0.609541736667087
2008039	9	0.203666150828108	0.565296345331505
2008039	10	0.182806290304131	0.523104363710259
2008039	11	0.152134749518174	0.477615935132753
2008039	12	0.127325958661444	0.402368749416668
2008039	13	0.113373588224325	0.352782619638383
2008039	14	0.101386960119376	0.313294353383097
2008039	15	0.0945301248003907	0.291239436901733
2008039	16	0.0906060088757604	0.279589998917268
2008039	17	0.086883770375873	0.269530852209474
2008039	18	0.0848788928652038	0.263068041166735
2008039	19	0.0847850734775746	0.259965377942079
2008039	20	0.0835956348145897	0.252688366147421
2008039	21	0.0826745460972577	0.246657445830827
2008039	22	0.0830923026013184	0.245530585018274
2008039	23	0.0837225958045986	0.250441467228302
2008040	0	0.0864355524976136	0.259016850778851
2008040	1	0.0865891692786652	0.260523897409915
2008040	2	0.08525520974366	0.260420527923266
2008040	3	0.0790175488338093	0.260465502738459
2008040	4	0.0776607456850955	0.26255401394013
2008040	5	0.0797919664027567	0.2713182101039
2008040	6	0.0843629831862569	0.28522126136766
2008040	7	0.0939518044390588	0.30606574750388
2008040	8	0.101921614494246	0.324377382041681
2008040	9	0.10574558684648	0.336868233200474
2008040	10	0.100428057449305	0.345946215763761
2008040	11	0.101249389865404	0.353668314185767
2008040	12	0.0935636084108516	0.32059708809931
2008040	13	0.0883222772580218	0.30527322293529
2008040	14	0.0866652857322029	0.307182478733887
2008040	15	0.0874146314835668	0.318618719428907
2008040	16	0.0882394725677222	0.328417798754589
2008040	17	0.0878824863626495	0.33124131035306
2008040	18	0.0868130239936553	0.33245743063654
2008040	19	0.0828667644623835	0.334092645978604
2008040	20	0.0816899652539237	0.343037774922218
2008040	21	0.083608431728198	0.356136034007067
2008040	22	0.0852260106948647	0.35912430453765
2008040	23	0.0841459007033479	0.354642837251873
2008041	0	0.0834350671711754	0.343911487826944
2008041	1	0.0809364326713712	0.33257900358494
2008041	2	0.0800881557202019	0.320449737380451
2008041	3	0.0799875665527274	0.306127493216646
2008041	4	0.0774674288541667	0.285733013145091
2008041	5	0.0746333434736413	0.269534324701053
2008041	6	0.0721081463075205	0.255758725318909
2008041	7	0.0690974831421216	0.241588283179747
2008041	8	0.0585093428791381	0.228521928895629
2008041	9	0.059571363810864	0.250252024530277
2008041	10	0.0529573841967163	0.243527675293997
2008041	11	0.0611043095345817	0.254532112487729
2008041	12	0.0605890883181225	0.238332935270646
2008041	13	0.0578407194024545	0.220662725912644
2008041	14	0.0543379865212518	0.210076183245777
2008041	15	0.0509583248874653	0.198889880327589
2008041	16	0.0480202747383308	0.189776949894131
2008041	17	0.0458717632872743	0.179665451803994
2008041	18	0.043623146523118	0.169007460263975
2008041	19	0.0416374943322001	0.15802848398388
2008041	20	0.0393446605662147	0.147336341110892
2008041	21	0.0370526730141173	0.135012347289612
2008041	22	0.0346873973216962	0.123536674903975
2008041	23	0.0320982038346667	0.113376648619624
2008042	0	0.0302083858663396	0.104404963940125
2008042	1	0.0284507919396299	0.0967699384169904
2008042	2	0.0272487179906067	0.0903547830031972
2008042	3	0.0262266076103343	0.0849688131832332
2008042	4	0.0252598516976966	0.080491304684606
2008042	5	0.0244418489158134	0.0768607476317729
2008042	6	0.023529335765348	0.0736819701151642
2008042	7	0.0225760821750221	0.0705245001827718
2008042	8	0.021700156003659	0.0672378552441761
2008042	9	0.0190505118001917	0.0637995447521046
2008042	10	0.022831860945824	0.0980184057415249
2008042	11	0.0345036943703092	0.155569335811272
2008042	12	0.044259056319901	0.201390365460493
2008042	13	0.0458389332433884	0.209170453970401
2008042	14	0.0459494218004296	0.216039036642989
2008042	15	0.0451767579906653	0.210087769306484
2008042	16	0.0417305820646617	0.195005476561565
2008042	17	0.0394299922796082	0.185303858644946
2008042	18	0.0375095472600414	0.177060543328477
2008042	19	0.0358420147252038	0.167251761060751
2008042	20	0.0347291206505484	0.156445287640993
2008042	21	0.0334265911631904	0.146252503397276
2008042	22	0.0316419441002718	0.136490708281923
2008042	23	0.0301143777475855	0.127305618926328
2008043	0	0.0284933639648944	0.119206275832769
2008043	1	0.0262119999833196	0.110742450798894
2008043	2	0.0232119183996352	0.100639640765595
2008043	3	0.0208343936297232	0.091082343768141
2008043	4	0.0173866853628969	0.0824950100289343
2008043	5	0.0149434070378353	0.075134248832671
2008043	6	0.0139731531602301	0.0695260021393185
2008043	7	0.0132952889400283	0.064661634616134
2008043	8	0.013070382648871	0.0607408145847068
2008043	9	0.0131345402988154	0.0583084353920673
2008043	10	0.011747521743374	0.058855424496867
2008043	11	0.0163380239478604	0.122884437543947
2008043	12	0.0641073045091924	0.350233438009059
2008043	13	0.0681042024693953	0.314893312333325
2008043	14	0.0629567136872982	0.284506986628294
2008043	15	0.0517485605427984	0.263393607693611
2008043	16	0.0457364794518771	0.249652812364402
2008043	17	0.0370997175135529	0.237599528939993
2008043	18	0.0318400859109163	0.222773192501988
2008043	19	0.0312881333829404	0.211594782586405
2008043	20	0.0305356896055246	0.20071476836143
2008043	21	0.0298875854979494	0.191985037681467
2008043	22	0.0293667739336193	0.184555528505172
2008043	23	0.0290016069331283	0.177847923404168
2008044	0	0.0286624714116175	0.170736581319593
2008044	1	0.0283668185072082	0.163215748729414
2008044	2	0.0280371629085104	0.15442292857188
2008044	3	0.0272510402147525	0.144288974110248
2008044	4	0.0264644235788149	0.135855642515177
2008044	5	0.0284575094919482	0.128722715940167
2008044	6	0.0275260778664386	0.122236873780279
2008044	7	0.0263768810929979	0.115621875853651
2008044	8	0.0277195948538995	0.129091351508269
2008044	9	0.0398207977742305	0.171178335827673
2008044	10	0.0545151194308638	0.223901631487182
2008044	11	0.0541020134461536	0.21921150425635
2008044	12	0.0544547978999816	0.206961902408315
2008044	13	0.0538868314156571	0.19443024238495
2008044	14	0.049687585123524	0.183710947851557
2008044	15	0.040864463664523	0.175896526018058
2008044	16	0.0322411125611819	0.172463155363638
2008044	17	0.028275962438031	0.174214115374618
2008044	18	0.0251750517531336	0.16749464711102
2008044	19	0.0244184484545279	0.161576090522528
2008044	20	0.0238316922105909	0.157489434529855
2008044	21	0.0234446484025242	0.155008064637357
2008044	22	0.0233518741182148	0.15515961064969
2008044	23	0.021399524266939	0.157538079179609
2008045	0	0.0219376734369704	0.159626028404849
2008045	1	0.0224375458101094	0.158497306056422
2008045	2	0.0205992609439054	0.154533418923079
2008045	3	0.0208391995762937	0.145529241190075
2008045	4	0.0209668998608285	0.13465338932344
2008045	5	0.0209347269953543	0.12155062586836
2008045	6	0.0197236512060485	0.104836662731933
2008045	7	0.0176723363582754	0.0902717710040793
2008045	8	0.0133575398937202	0.0828165312631181
2008045	9	0.0136832216113632	0.106341761668778
2008045	10	0.015466607204549	0.117689128998126
2008045	11	0.018623677937301	0.100780998944136
2008045	12	0.0194569793438907	0.0823158134526648
2008045	13	0.0224091840023519	0.0808873032091904
2008045	14	0.0239711658673605	0.0865202288241612
2008045	15	0.027733603889073	0.0993627349910889
2008045	16	0.0364113023937485	0.118015957760487
2008045	17	0.0440483429033475	0.1262076474954
2008045	18	0.0531746186553916	0.128011182000347
2008045	19	0.0645200316359232	0.130304455997262
2008045	20	0.0794942351299435	0.134909466895002
2008045	21	0.0844319373401035	0.129284842439876
2008045	22	0.0761396270556376	0.109075535439524
2008045	23	0.0693653601944737	0.100087930491056
2008046	0	0.0725788731748908	0.105365751683177
2008046	1	0.075763922854628	0.106375749486332
2008046	2	0.0719839478520801	0.100287156222159
2008046	3	0.0671384516372363	0.104063986176532
2008046	4	0.0661503064606417	0.1153959486917
2008046	5	0.0665750985774705	0.124358906196162
2008046	6	0.0787585512961878	0.14919804883293
2008046	7	0.151019003499767	0.315393777434909
2008046	8	0.275005801227701	0.619601003276011
2008046	9	0.351739091467448	0.740375709219389
2008046	10	0.361326345244541	0.732039934972536
2008046	11	0.339125680877839	0.640434137086944
2008046	12	0.285586471064706	0.511293118297874
2008046	13	0.254410603634972	0.431694144828086
2008046	14	0.226267672974994	0.373598726229423
2008046	15	0.202559768888675	0.338228271333364
2008046	16	0.177273755701275	0.313834791053072
2008046	17	0.161515108365294	0.301672332216172
2008046	18	0.149573721400596	0.293604728727609
2008046	19	0.138847580579616	0.292212824568768
2008046	20	0.137853328879079	0.306451520667449
2008046	21	0.143446346217099	0.335567549756326
2008046	22	0.149611336823795	0.367133934845949
2008046	23	0.159148224318888	0.394953114116558
2008047	0	0.16243225875696	0.40705611356953
2008047	1	0.159195409375453	0.404936954231196
2008047	2	0.156774765157748	0.402765749409414
2008047	3	0.154450946978964	0.403682765100856
2008047	4	0.151841126138292	0.396579775245512
2008047	5	0.148857464636383	0.385541700056826
2008047	6	0.147029441556467	0.369919250688176
2008047	7	0.144302837607849	0.349194398914236
2008047	8	0.14973213369775	0.331184013437219
2008047	9	0.166747342629795	0.37274541652576
2008047	10	0.216967630124706	0.479685511079038
2008047	11	0.24009989463655	0.522632620019723
2008047	12	0.244370805819017	0.529428012805739
2008047	13	0.241787618525285	0.55692519417776
2008047	14	0.24790921834277	0.583104730291762
2008047	15	0.250982658684014	0.602179758469126
2008047	16	0.245284058881413	0.611643759012212
2008047	17	0.233168311708423	0.611626624281378
2008047	18	0.220252405412702	0.589393410895737
2008047	19	0.213779078993317	0.573262787635732
2008047	20	0.209956860696047	0.579637601011218
2008047	21	0.202678026825386	0.566692190141245
2008047	22	0.190404624954665	0.551296928871655
2008047	23	0.18082949710185	0.544214576372537
2008048	0	0.167373083061306	0.520632523490824
2008048	1	0.158490400878383	0.500488733390313
2008048	2	0.150472820338665	0.476338045835278
2008048	3	0.145769022757342	0.454427434900911
2008048	4	0.147521107588315	0.431972821860108
2008048	5	0.154264510843325	0.433755758742098
2008048	6	0.155014058205793	0.421142626503986
2008048	7	0.157139081597977	0.394986431203397
2008048	8	0.148851734802149	0.349136159650955
2008048	9	0.14877441387041	0.319655321171467
2008048	10	0.148413303818264	0.290182418494824
2008048	11	0.144477271963956	0.26754043804357
2008048	12	0.138453426674979	0.246939197700232
2008048	13	0.129231476629337	0.229351860976141
2008048	14	0.119571624233428	0.215092019776474
2008048	15	0.10719043560489	0.197273123616094
2008048	16	0.0948353719878035	0.185296028910695
2008048	17	0.0904202415314784	0.179811209196217
2008048	18	0.083932008754878	0.168223239169682
2008048	19	0.0751749733048338	0.15295757110495
2008048	20	0.0697842044433967	0.141080029929924
2008048	21	0.0643041254278839	0.130630694332482
2008048	22	0.060830642695289	0.123157764069325
2008048	23	0.057603218835535	0.118375383177842
2008049	0	0.0559951678921844	0.116465978405277
2008049	1	0.0545088559630175	0.114550652149531
2008049	2	0.0531551765693202	0.115393751108247
2008049	3	0.0513414861241147	0.120507174936661
2008049	4	0.052133650525592	0.136248597419451
2008049	5	0.0573474282909571	0.168391276486428
2008049	6	0.0580878422291734	0.184158389903378
2008049	7	0.0571224949525323	0.194855585312467
2008049	8	0.0552091430871409	0.209339692620771
2008049	9	0.0590857023401974	0.236139478504202
2008049	10	0.0617545953261499	0.260440791952061
2008049	11	0.0657683966467378	0.28487449265505
2008049	12	0.0680008570356135	0.292479563751015
2008049	13	0.0582824689834148	0.278390370937446
2008049	14	0.0516368928329247	0.284959155051367
2008049	15	0.0480229292376828	0.317798953046176
2008049	16	0.0546687013240051	0.403403941492078
2008049	17	0.0724723096638137	0.556787416749264
2008049	18	0.0807446567582921	0.60602970757068
2008049	19	0.0778133930667352	0.569029840555217
2008049	20	0.0710196222041594	0.508684164134794
2008049	21	0.0602620955612683	0.424644785247199
2008049	22	0.0547143665556697	0.375586062768824
2008049	23	0.049202397218254	0.324182661746836
2008050	0	0.0426911658788238	0.273628998036989
2008050	1	0.0394260845080992	0.250860978746078
2008050	2	0.0414932935634999	0.263539169877007
2008050	3	0.0478338505600631	0.309258400902665
2008050	4	0.0556717122466165	0.368396449206122
2008050	5	0.0615007547975926	0.416477260881285
2008050	6	0.0629805356580759	0.435280449038187
2008050	7	0.0609014550273513	0.423680745613452
2008050	8	0.0609908176610143	0.433841955578803
2008050	9	0.166652874071219	1.24428743484593
2008050	10	0.21299077847696	1.59744861402438
2008050	11	0.227039771228633	1.68455110068049
2008050	12	0.225635053456079	1.66342289197801
2008050	13	0.19155883652251	1.43942967604656
2008050	14	0.147477624626426	1.06312359247076
2008050	15	0.0911025594560674	0.60390548879779
2008050	16	0.0487625930901164	0.294220837974936
2008050	17	0.0295843166917145	0.166387698815406
2008050	18	0.0226599175822327	0.118011294149544
2008050	19	0.0199300801855886	0.0947631936376836
2008050	20	0.0202833644911609	0.0825467540698872
2008050	21	0.0198803308390327	0.076268611712943
2008050	22	0.0215567442113887	0.0760796688464431
2008050	23	0.0242725388805517	0.0829774491665454
2008051	0	0.0294767743824023	0.101255488648282
2008051	1	0.0366494294681845	0.133456420828623
2008051	2	0.0460347849200698	0.184384480899465
2008051	3	0.0572722857011409	0.248518624584074
2008051	4	0.0683280353932027	0.314845096833828
2008051	5	0.0832852866705606	0.379383513512407
2008051	6	0.0964520187408671	0.438424175404587
2008051	7	0.109163235359665	0.493109213567588
2008051	8	0.103716099491091	0.532464123198172
2008051	9	0.0974048842135236	0.501715002702875
2008051	10	0.059828256553517	0.284107612773394
2008051	11	0.0341012180320496	0.145948808497614
2008051	12	0.0191046290610461	0.0751422587967617
2008051	13	0.0121610502153672	0.0452658763544679
2008051	14	0.00812871999541599	0.0304774981086347
2008051	15	0.00588859860819559	0.0230395272867277
2008051	16	0.0048985561054331	0.0195140018764551
2008051	17	0.00428704495748778	0.0175993367025902
2008051	18	0.00385319402390306	0.0162475513960968
2008051	19	0.00351247588617015	0.0149837629644006
2008051	20	0.00334141372842645	0.0140975180676687
2008051	21	0.00353394448507353	0.0137708492342054
2008051	22	0.00412558185613171	0.0144767545202623
2008051	23	0.0046730825948798	0.016416661268293
2008052	0	0.00486622798160458	0.018134005872904
2008052	1	0.00489197035458426	0.0185285954791279
2008052	2	0.00471122799982062	0.0179337377934196
2008052	3	0.00453930101198292	0.0163691297569494
2008052	4	0.00474149739047697	0.0152207319950065
2008052	5	0.0077903356926102	0.0238835373466871
2008052	6	0.0100949951180538	0.0324872553552653
2008052	7	0.00901113467737923	0.0288428502786891
2008052	8	0.00845974010055282	0.0284121331490798
2008052	9	0.0098290989095978	0.030196230663595
2008052	10	0.0144453970662636	0.0339142871382732
2008052	11	0.01623465715894	0.0348730323096473
2008052	12	0.0168091421320744	0.0387571713799257
2008052	13	0.0125282162056712	0.033831357196008
2008052	14	0.0198447161727147	0.0708848266288838
2008052	15	0.0314302459878646	0.123945902507577
2008052	16	0.0317283658801291	0.122950835792704
2008052	17	0.0260402955880592	0.100002593145523
2008052	18	0.0176534760738182	0.0684210183607467
2008052	19	0.015824864161829	0.0736388693526043
2008052	20	0.0192593741815318	0.0864350477150196
2008052	21	0.0209856853677386	0.088823915711521
2008052	22	0.0260499662090056	0.106832501529099
2008052	23	0.0341684156514212	0.144481481041342
2008053	0	0.0560705521622635	0.19624288112634
2008053	1	0.0815891511889917	0.287974892192522
2008053	2	0.10227267451365	0.375179089240839
2008053	3	0.0961989099039203	0.366904568450358
2008053	4	0.0922571506773197	0.327358079778214
2008053	5	0.109874883563383	0.349255567384933
2008053	6	0.100291415156798	0.382554865641828
2008053	7	0.0869404116647839	0.365447562482628
2008053	8	0.0917087244462729	0.419131940275826
2008053	9	0.0932302393596166	0.427137979589648
2008053	10	0.0894768808467786	0.397853568359838
2008053	11	0.0843562166769235	0.356080161658235
2008053	12	0.0851034266812319	0.342691176423368
2008053	13	0.0922121626733288	0.350567983072026
2008053	14	0.0939571409451137	0.356980698311172
2008053	15	0.0967218477748163	0.38086337606194
2008053	16	0.086661299286657	0.381901441021336
2008053	17	0.082463538942535	0.356535552342536
2008053	18	0.0644551382036957	0.214365849728396
2008053	19	0.0337594363815048	0.122996155386044
2008053	20	0.0152486554620587	0.0636209047628748
2008053	21	0.00253725321041819	0.0115543956098861
2008053	22	0.00462907940652177	0.0198869705072955
2008053	23	0.159665601636518	0.782086751352673
2008054	0	0.219366052953178	1.10405297567064
2008054	1	0.248013995448425	1.28068526680923
2008054	2	0.250599362877574	1.34651941224821
2008054	3	0.227282030334299	1.30061442215181
2008054	4	0.197386651383422	1.14443235084661
2008054	5	0.178637823434688	1.00833699789402
2008054	6	0.205593940214688	0.836760520765088
2008054	7	0.117328064942155	0.623264059116991
2008054	8	0.218961597426572	1.30746960291052
2008054	9	0.242432227445927	1.22089533689433
2008054	10	0.271087621114442	1.19458208643054
2008054	11	0.292278200522229	1.17187677010205
2008054	12	0.269886560742572	0.967985978599421
2008054	13	0.237803804884873	0.75219103658432
2008054	14	0.21652504087173	0.565448840938764
2008054	15	0.219340339601623	0.458072153876579
2008054	16	0.214850725420794	0.446521400805633
2008054	17	0.197242084718743	0.447073959855101
2008054	18	0.185391216289149	0.431380846792158
2008054	19	0.132914472776313	0.35168203180461
2008054	20	0.0943392825823528	0.269406989457105
2008054	21	0.078219173312503	0.260579244609543
2008054	22	0.0629584955475595	0.308325521208901
2008054	23	0.075577816914132	0.461563290537876
2008055	0	0.106996510055235	0.61489143934158
2008055	1	0.115504599049061	0.65962269492768
2008055	2	0.125502078597204	0.736420543793956
2008055	3	0.132492540688851	0.793882956532661
2008055	4	0.12934463376888	0.81649013892529
2008055	5	0.136984490405332	0.867427940596733
2008055	6	0.125102391738149	0.734438204727066
2008055	7	0.0941827341949087	0.521969739567766
2008055	8	0.0801089645380996	0.358305429455408
2008055	9	0.0635564506316843	0.246523169012562
2008055	10	0.0732983844329266	0.233106958157874
2008055	11	0.0824921743728803	0.231371045094788
2008055	12	0.0763834853903341	0.204914681895753
2008055	13	0.0651928096833504	0.179856863481502
2008055	14	0.0625822819224728	0.171805447671594
2008055	15	0.0593570048701565	0.173139637025101
2008055	16	0.0562093146353294	0.183174101282821
2008055	17	0.0594497027460288	0.213533630554123
2008055	18	0.0802546429542236	0.278495894622024
2008055	19	0.101732014328937	0.30807345952556
2008055	20	0.0951432575824223	0.29063108254702
2008055	21	0.0757399850149537	0.231586464553175
2008055	22	0.0337512176513924	0.0976159528392356
2008055	23	0.0227060141726871	0.0656111295967054
2008056	0	0.0171878469637009	0.0538920914197552
2008056	1	0.0122577500757794	0.0391718384924191
2008056	2	0.00967692073095286	0.0335485870398476
2008056	3	0.00740217802114647	0.0253470605245776
2008056	4	0.00614895849945512	0.0227790327435116
2008056	5	0.00446120434932741	0.0155057811060824
2008056	6	0.0198771677240979	0.0620820546106414
2008056	7	0.058706097882955	0.175162449359779
2008056	8	0.116570034028199	0.343403465168477
2008056	9	0.220129941102042	0.654343083271457
2008056	10	0.324357841403924	0.945105395866332
2008056	11	0.362158368816102	1.00203903897914
2008056	12	0.338087511487602	0.897477998948934
2008056	13	0.33322569815348	0.831191963132359
2008056	14	0.314072802127581	0.785838195759001
2008056	15	0.279843465372548	0.758290812466433
2008056	16	0.254957638229956	0.74173575433236
2008056	17	0.227769246473078	0.725369265655956
2008056	18	0.198355736099459	0.695468591657719
2008056	19	0.167110632067991	0.641265964049083
2008056	20	0.120616784238755	0.504398292780733
2008056	21	0.0408865754078052	0.204800799049673
2008056	22	0.0134888077705746	0.0761877025152368
2008056	23	0.00936505748919557	0.076968438250798
2008057	0	0.021868168870981	0.217620675743005
2008057	1	0.0368331155597646	0.370609727751642
2008057	2	0.0419069237262267	0.424138773649959
2008057	3	0.0497825079891389	0.448744276843887
2008057	4	0.0630877055716225	0.354592996760835
2008057	5	0.0287928338402855	0.120881403425377
2008057	6	0.0144696564070189	0.0578323364927135
2008057	7	0.011922778274154	0.0444672596744295
2008057	8	0.0132366418705567	0.048088011321492
2008057	9	0.0146771957339115	0.0543013842347368
2008057	10	0.00914184352175447	0.0342776574903768
2008057	11	0.00333040541632424	0.0135734720135032
2008057	12	0.00209584060818429	0.00809087782269968
2008057	13	0.0016139213908296	0.00632211188043946
2008057	14	0.00113286260339062	0.00511093343701395
2008057	15	0.000680200867129327	0.00333976108383085
2008057	16	0.000397631312459381	0.00122970741036891
2008057	17	0.00418440551402833	0.0156067114235428
2008057	18	0.0252742564575651	0.101418638899769
2008057	19	0.0484179754128346	0.181795281400886
2008057	20	0.0528549500694583	0.183535322851806
2008057	21	0.0580395203255638	0.196485919365452
2008057	22	0.0577954617634238	0.209883437876563
2008057	23	0.0645904933249321	0.253451576882979
2008058	0	0.102620308958691	0.37299099208428
2008058	1	0.086263274030204	0.284650053717916
2008058	2	0.0813703941913263	0.300012022761728
2008058	3	0.101462298273585	0.440976896866162
2008058	4	0.125164735846069	0.570378174239245
2008058	5	0.0894973633009659	0.403705666845314
2008058	6	0.0655503438484382	0.313924803114169
2008058	7	0.0843852164524327	0.433263899973098
2008058	8	0.108032786570188	0.550859389060589
2008058	9	0.126378107895294	0.63135782193675
2008058	10	0.146641304607805	0.735904892653001
2008058	11	0.157053159295902	0.786883024354432
2008058	12	0.197997778776819	1.05426513096652
2008058	13	0.172362866873078	0.845245631302152
2008058	14	0.173303295197632	0.789339552915791
2008058	15	0.188332554828188	0.787031225031313
2008058	16	0.187666295879311	0.682466634553388
2008058	17	0.157801801805701	0.535990312389819
2008058	18	0.137257697224185	0.502825915935198
2008058	19	0.0766700160111322	0.36292237635396
2008058	20	0.139029085130712	0.710493659520122
2008058	21	0.232679455192744	1.09359231173564
2008058	22	0.282670904839197	1.30450941555148
2008058	23	0.27016684203367	1.2618331961856
2008059	0	0.265075463906252	1.25698149317832
2008059	1	0.297460201394003	1.39538533676017
2008059	2	0.342671471020013	1.44423137151735
2008059	3	0.355802250574708	1.24024965800168
2008059	4	0.33276655416034	1.07103534359138
2008059	5	0.268767532534684	0.982094156828038
2008059	6	0.215762744975351	0.959039696215825
2008059	7	0.252008256032954	0.96435380949589
2008059	8	0.286590339108127	0.981041042633195
2008059	9	0.327448077092797	0.998781035583995
2008059	10	0.324734145765943	0.992276853093593
2008059	11	0.338263225348354	0.994789842750108
2008059	12	0.30779771713248	0.864886965590849
2008059	13	0.297384664755237	0.736671197621421
2008059	14	0.297214238593671	0.65548762334393
2008059	15	0.282202887999023	0.624622275685695
2008059	16	0.258251367455795	0.597256861971396
2008059	17	0.229534418241387	0.567529654319864
2008059	18	0.2001847163715	0.531891767131236
2008059	19	0.176298577026313	0.501731392816599
2008059	20	0.167249129710835	0.495177152099878
2008059	21	0.151914329984428	0.454987537884911
2008059	22	0.122240004902978	0.398748621978934
2008059	23	0.121451844434505	0.44549641907366
2008060	0	0.143709441831889	0.590892398590891
2008060	1	0.16835875019867	0.678505156406903
2008060	2	0.151847553234458	0.686711682795361
2008060	3	0.134697415933812	0.656756741240342
2008060	4	0.113363723967409	0.61074812340256
2008060	5	0.105847812118524	0.566897307572327
2008060	6	0.105680928721418	0.532093393575487
2008060	7	0.102651386425319	0.518286164195665
2008060	8	0.16678868343789	0.681887529766489
2008060	9	0.213081653926844	0.759622294413788
2008060	10	0.223739688474972	0.75466732404137
2008060	11	0.244975158751127	0.809113787234587
2008060	12	0.297964609033022	0.892068786302713
2008060	13	0.319127847058472	0.83055524622303
2008060	14	0.308305472014919	0.715939404557357
2008060	15	0.236525173028447	0.581838364546809
2008060	16	0.178204499959331	0.424743849977393
2008060	17	0.14011370660333	0.346577424266419
2008060	18	0.125637836969399	0.313180057209264
2008060	19	0.0966165580134853	0.228809070086651
2008060	20	0.0664943756021192	0.141400423772069
2008060	21	0.0379843476179562	0.0798666150194085
2008060	22	0.005088855403692	0.0177909468487738
2008060	23	0.00185671899553986	0.00929340853294887
