# Supplementary material for: A comparison of sea salt emission parameterizations in northwestern Europe using a chemistry transport model setup
Source: Copernicus journal article supplement (doi:10.5194/acp-16-9905-2016), 2016-08-08
Supplement: Supplementary file 2 [file acp-16-9905-2016-supplement.zip › conc/conc.timeseries.values.win2008.ov14.Na.DE0044R.csv]

doy	hour	pm2.5	pm10
2008001	0	0.249021975345451	0.61126952096308
2008001	1	0.24715571825533	0.655788768902476
2008001	2	0.235884742592811	0.593983756715115
2008001	3	0.218643935562192	0.544424861361032
2008001	4	0.202211046445747	0.540877561645635
2008001	5	0.184733976612135	0.510328825484661
2008001	6	0.170925033395006	0.501152922534809
2008001	7	0.167606335768637	0.500303852336515
2008001	8	0.163319548998166	0.491197341765393
2008001	9	0.171205379163047	0.545950044167393
2008001	10	0.197659355794678	0.658788853773759
2008001	11	0.213596522782153	0.604002064080687
2008001	12	0.239555789801702	0.568147406793119
2008001	13	0.257975489275947	0.624770558397559
2008001	14	0.286410617612092	0.819864603852965
2008001	15	0.294732508997871	0.814666205948095
2008001	16	0.285310989355572	0.671705688486954
2008001	17	0.275287789518139	0.578746672353685
2008001	18	0.271870241736104	0.536637217696335
2008001	19	0.261580335540771	0.469614634729785
2008001	20	0.251814557065783	0.447599256103342
2008001	21	0.241110233601511	0.418146008528693
2008001	22	0.227834712992744	0.384247057704377
2008001	23	0.207941496970353	0.34280303957125
2008002	0	0.192860627906498	0.313316981036026
2008002	1	0.177114676644137	0.286014880491343
2008002	2	0.163708100427037	0.258363673392126
2008002	3	0.155359384152547	0.231162084004355
2008002	4	0.148328131398771	0.20435805097669
2008002	5	0.139532544496245	0.184802121289189
2008002	6	0.134904459362598	0.182117447482665
2008002	7	0.137995283391695	0.18449458286781
2008002	8	0.142940206409166	0.189568490573788
2008002	9	0.156383302174204	0.205878369652782
2008002	10	0.180850199023041	0.229217236806973
2008002	11	0.189467750810625	0.247227480248435
2008002	12	0.172579303989814	0.265662680979091
2008002	13	0.108201294125637	0.256016247152541
2008002	14	0.0622617650762857	0.226046513470627
2008002	15	0.0486797149517399	0.132832077907644
2008002	16	0.0219128433664868	0.0371197850943256
2008002	17	0.0152618199812753	0.0224950975415882
2008002	18	0.0157436155736177	0.0277816616364185
2008002	19	0.0166864857939749	0.032682295656023
2008002	20	0.0138327967977548	0.0247276713738275
2008002	21	0.0101624170161102	0.0177663644001628
2008002	22	0.00820172646211286	0.0146533000717654
2008002	23	0.00704742560578187	0.01356578704093
2008003	0	0.00676047573159971	0.0133682068369162
2008003	1	0.00714702847304958	0.0131684164469082
2008003	2	0.00575802069787081	0.00966040848755471
2008003	3	0.00405156104968814	0.0073101099928655
2008003	4	0.00459043269235951	0.00970649376094224
2008003	5	0.0084685937417395	0.0227263468324297
2008003	6	0.0110778852997083	0.0297857940760953
2008003	7	0.011140709684472	0.0315212912845589
2008003	8	0.0138120263796108	0.0436449356627121
2008003	9	0.0210743720980293	0.0676454355812543
2008003	10	0.0313820667325562	0.0851121460644196
2008003	11	0.0368983775672134	0.0849049331825616
2008003	12	0.0417296018672271	0.0797754635773612
2008003	13	0.0435926435483607	0.0700263952349158
2008003	14	0.0431441381839303	0.0655676056016035
2008003	15	0.0415601820968951	0.0650583028059682
2008003	16	0.0357440425334605	0.061588655236737
2008003	17	0.0296910181571046	0.0568711765145617
2008003	18	0.0258710686089907	0.0547004904537834
2008003	19	0.0250922784931805	0.0546838905150274
2008003	20	0.0249278451827665	0.0547617402306089
2008003	21	0.0244778893250571	0.0537565986980299
2008003	22	0.024987014610857	0.0556339771383833
2008003	23	0.0266241048379237	0.059268405494491
2008004	0	0.0291656306117117	0.0648544968306264
2008004	1	0.0309122989833914	0.0699691903990576
2008004	2	0.0316154045000928	0.0741271022867692
2008004	3	0.0327804793588897	0.078623889890276
2008004	4	0.0346555808863962	0.081413679135587
2008004	5	0.037990909078379	0.0814033902210097
2008004	6	0.0379673925043732	0.0735591332886561
2008004	7	0.038964749365647	0.0796902036341488
2008004	8	0.0319930573672654	0.0726090181707298
2008004	9	0.0364163940979747	0.0804902829259882
2008004	10	0.0369572169574555	0.07414892168754
2008004	11	0.0368343160881179	0.069521565643214
2008004	12	0.0364357344062362	0.0656988745607522
2008004	13	0.0344720815239594	0.0591048285248486
2008004	14	0.0334031746140607	0.0564510880021031
2008004	15	0.0320101946541981	0.0513233872305342
2008004	16	0.0292300529841086	0.0424251858253189
2008004	17	0.0262518439979914	0.0351261478397967
2008004	18	0.0252667091020716	0.0332270596099825
2008004	19	0.0243548136270194	0.031266255797701
2008004	20	0.022741956043318	0.0280750380347302
2008004	21	0.0211447297187086	0.0254613858309014
2008004	22	0.0208160757788562	0.0249581799281154
2008004	23	0.0219922378559142	0.026921223812561
2008005	0	0.0236104118324577	0.029630338120191
2008005	1	0.0250285634232569	0.0335704685863697
2008005	2	0.0338390718141478	0.0551227007138293
2008005	3	0.0440970177637353	0.0791758545668949
2008005	4	0.0529755357836296	0.0967861903630458
2008005	5	0.0567309528313615	0.101969465081003
2008005	6	0.0580610287970521	0.102284296010718
2008005	7	0.056746955780958	0.0990558114461723
2008005	8	0.055819788561339	0.0995409388851309
2008005	9	0.057547120979601	0.105777896706869
2008005	10	0.0589013691833107	0.112407109724907
2008005	11	0.0593971937688888	0.117174309834828
2008005	12	0.0574451971937483	0.116948941810709
2008005	13	0.0551973454471213	0.113929704335057
2008005	14	0.0551958431586666	0.113316126783327
2008005	15	0.0540290403858999	0.113877345612432
2008005	16	0.0527656734773879	0.113366009224785
2008005	17	0.0376906494452194	0.0885243344507362
2008005	18	0.0250771368286345	0.0597903289238599
2008005	19	0.0199930036054781	0.0467205231311456
2008005	20	0.0166027944612865	0.0393022898157953
2008005	21	0.0140172340653004	0.0367687077882106
2008005	22	0.0133364343794009	0.0370312134355793
2008005	23	0.0127823185383676	0.0372318865992224
2008006	0	0.0120718110686934	0.0368586607113211
2008006	1	0.01227676267274	0.0396110908527087
2008006	2	0.0141633274595214	0.0461505376984535
2008006	3	0.0163696995226091	0.0534506616554256
2008006	4	0.0176251197264072	0.0584547922487064
2008006	5	0.0187607334555684	0.0602622570846747
2008006	6	0.0196150846171221	0.0614156508562184
2008006	7	0.0186562562272113	0.0612906803409632
2008006	8	0.0189756545985726	0.0612224941415564
2008006	9	0.0183299881361129	0.0597094671999981
2008006	10	0.016240097337163	0.0552206840740649
2008006	11	0.0137179883811469	0.0475968286742037
2008006	12	0.011015876407541	0.038809696348082
2008006	13	0.0090459430583752	0.0338142883986107
2008006	14	0.00941705223731602	0.0371815006876633
2008006	15	0.00953158431855943	0.0383742092764168
2008006	16	0.00792018851941686	0.0333231559467333
2008006	17	0.0059249801388619	0.0265320437353747
2008006	18	0.00605564571258701	0.0294529283361929
2008006	19	0.0124955360975555	0.066061427591416
2008006	20	0.0219877782280064	0.12563371860077
2008006	21	0.0268601543208116	0.153948822210384
2008006	22	0.0274544801531639	0.158947846165786
2008006	23	0.0253913828593305	0.147827952114369
2008007	0	0.0248298314573987	0.144425614506359
2008007	1	0.0261020309529883	0.15393857973874
2008007	2	0.0297160016864046	0.176366986103332
2008007	3	0.037753066352583	0.196737078637148
2008007	4	0.0454404550480904	0.202891902952973
2008007	5	0.0497421430825395	0.218447410545253
2008007	6	0.0587181715977829	0.26844668790509
2008007	7	0.0864989357531083	0.36912869769802
2008007	8	0.1017648136791	0.441763833100739
2008007	9	0.132918975368112	0.523136611045791
2008007	10	0.133154891563076	0.521997649312526
2008007	11	0.103196464217139	0.412946876919437
2008007	12	0.0222662760178549	0.105011795704873
2008007	13	0.0184942591000154	0.0976149536309674
2008007	14	0.0606063333378002	0.319665581304919
2008007	15	0.055048212113663	0.244443382737903
2008007	16	0.0365655495485629	0.152585764553317
2008007	17	0.038996716481932	0.149330685953527
2008007	18	0.056287747481896	0.201349705041599
2008007	19	0.0522584672105889	0.17801582344717
2008007	20	0.0510145181318232	0.175052375547019
2008007	21	0.0599934697255485	0.21064710615
2008007	22	0.0649827455273336	0.223599802757435
2008007	23	0.0696551854757431	0.234803015129576
2008008	0	0.0628546163744691	0.195843238296571
2008008	1	0.0416845585684352	0.14084558360291
2008008	2	0.0335768461151439	0.169251101045351
2008008	3	0.0385668020594621	0.193220709172814
2008008	4	0.0205673220802277	0.0916376516829309
2008008	5	0.0200382362832883	0.086118087847161
2008008	6	0.0401292143944507	0.161000283934203
2008008	7	0.049608879521599	0.185396525352673
2008008	8	0.0467041662631992	0.160583169190591
2008008	9	0.0454822150782103	0.140425260587332
2008008	10	0.0536921664001661	0.1332588358009
2008008	11	0.0467542303500695	0.0919670019642883
2008008	12	0.0365835286866565	0.0685895157228144
2008008	13	0.0434011343419309	0.101811573444909
2008008	14	0.0487140445244329	0.116377761322296
2008008	15	0.0443036296651104	0.0962740386967217
2008008	16	0.045941960137016	0.0984382084124699
2008008	17	0.108246592597161	0.383197294374084
2008008	18	0.114738158293566	0.475684640611004
2008008	19	0.110148118688826	0.39779859812511
2008008	20	0.0831267368423624	0.331073031404519
2008008	21	0.0725811934300933	0.297252125605623
2008008	22	0.0723289940033896	0.288839876685795
2008008	23	0.0800252077227069	0.33808838314575
2008009	0	0.0995530129445093	0.399843735215028
2008009	1	0.105641408830185	0.411723996808237
2008009	2	0.104171064875361	0.388697253458225
2008009	3	0.0961589376927857	0.370382986316998
2008009	4	0.0944017934379286	0.359167177176043
2008009	5	0.110287954929619	0.392309291518944
2008009	6	0.162686924618014	0.507365449554287
2008009	7	0.187398892010109	0.498548939650278
2008009	8	0.123115377620575	0.302531864159421
2008009	9	0.0713280245806381	0.179006035162825
2008009	10	0.0676633027440924	0.162076995926073
2008009	11	0.0710493802653572	0.168335608720322
2008009	12	0.0710334669665171	0.179733943866598
2008009	13	0.0768607180982	0.210753183730682
2008009	14	0.0761891572919811	0.22878257310887
2008009	15	0.066048553664682	0.198520177539477
2008009	16	0.0476942662498545	0.134288221313593
2008009	17	0.0324032348509109	0.0967441065486308
2008009	18	0.0261977322251419	0.0935207047268152
2008009	19	0.0217075136623162	0.0881993830457782
2008009	20	0.0173736235969147	0.0730158666385706
2008009	21	0.013878082137325	0.060033952216366
2008009	22	0.011681610210839	0.0508379629878735
2008009	23	0.010487902939234	0.044937155493615
2008010	0	0.00960866269402003	0.0404857639097234
2008010	1	0.00952070400417366	0.037299121423919
2008010	2	0.00936175648916226	0.0347468834525354
2008010	3	0.00854037309950433	0.0316939547929093
2008010	4	0.00764094980619017	0.0271086974449007
2008010	5	0.00573666219423986	0.0205363223116561
2008010	6	0.00490100987101543	0.0180192058427548
2008010	7	0.00574229103601295	0.0241231143230786
2008010	8	0.010349491730544	0.0506434102651336
2008010	9	0.0135769297205957	0.0811669692317266
2008010	10	0.018887557783814	0.0885430148279774
2008010	11	0.0116927593488394	0.048247076630072
2008010	12	0.00775940544291086	0.0280705942011591
2008010	13	0.00850221735576417	0.0297210837985844
2008010	14	0.0104949733312425	0.0390410814927795
2008010	15	0.011641815380365	0.0455942892027913
2008010	16	0.0168350191298094	0.0645355447013027
2008010	17	0.0198682480841177	0.0695590771125208
2008010	18	0.0177906761292224	0.0594740153482858
2008010	19	0.0174333877111292	0.0584229525384697
2008010	20	0.0162179537165803	0.052300590562316
2008010	21	0.01397438865426	0.0433957083416191
2008010	22	0.0128406482768629	0.0390105463144196
2008010	23	0.0111135607072928	0.03538040274748
2008011	0	0.0129723263617627	0.0393997565139292
2008011	1	0.0157967280540314	0.0458314274929834
2008011	2	0.017267184303084	0.050099000297559
2008011	3	0.0189124830008702	0.051318918075739
2008011	4	0.0211225991414729	0.0566825967053981
2008011	5	0.0240875693913326	0.0627072134324707
2008011	6	0.0243630666118672	0.0616568655018735
2008011	7	0.0235235661481697	0.0561009616569147
2008011	8	0.0208549836843345	0.0487740596518932
2008011	9	0.0176512702149606	0.040778889971972
2008011	10	0.0132217455578008	0.0313326177186394
2008011	11	0.0122144768373307	0.0295377218901759
2008011	12	0.0112941799220131	0.027337615943864
2008011	13	0.0103337214312842	0.0254193779242605
2008011	14	0.00968745091668941	0.0246135860002105
2008011	15	0.00892447957024919	0.0237054693763938
2008011	16	0.00859337692985682	0.023903952880705
2008011	17	0.00991700238440556	0.0282674589114692
2008011	18	0.0106363926729299	0.031423575523019
2008011	19	0.0118535088548753	0.0349148234892654
2008011	20	0.0151496825265196	0.0433495433788651
2008011	21	0.0179953751696199	0.0496226732962448
2008011	22	0.0180606379251933	0.0479887322933022
2008011	23	0.016429965460496	0.0431997748044326
2008012	0	0.0148772393942856	0.0390550965266308
2008012	1	0.014204716789186	0.0363647358074342
2008012	2	0.0136377763437661	0.0353117983119687
2008012	3	0.0131264414924761	0.0352284987367265
2008012	4	0.01196315401153	0.0339191655556784
2008012	5	0.0106417456165987	0.0312460491945594
2008012	6	0.00959210206211852	0.0283890765564389
2008012	7	0.00793442207899299	0.0238584623430937
2008012	8	0.0067538501495269	0.0200272525279871
2008012	9	0.00682169871637733	0.0186275265672738
2008012	10	0.0182838237756301	0.046176514437816
2008012	11	0.0581673125036535	0.158076736378111
2008012	12	0.123917747363343	0.31159035938419
2008012	13	0.184218253589375	0.391263366572143
2008012	14	0.188564871151797	0.371015291652232
2008012	15	0.146346099439794	0.3035029876451
2008012	16	0.132991804521323	0.292831953547527
2008012	17	0.119187707825407	0.294615071745424
2008012	18	0.111419543218054	0.304018006398421
2008012	19	0.104400280305332	0.317957351110644
2008012	20	0.101326556178305	0.339408824473995
2008012	21	0.0949466827480659	0.358896439463253
2008012	22	0.0941782261134629	0.367902945415488
2008012	23	0.088911479709459	0.359887411168587
2008013	0	0.091684662723622	0.356666325060239
2008013	1	0.0880968459754577	0.354019731714232
2008013	2	0.0904430238686746	0.349284781019369
2008013	3	0.0904532329795471	0.343847276573421
2008013	4	0.0888959438942244	0.351117016600706
2008013	5	0.0864301091674418	0.354478382366947
2008013	6	0.0913190936969526	0.364372720829456
2008013	7	0.0940880367446932	0.36651392571378
2008013	8	0.0953929767965359	0.363178359512955
2008013	9	0.0988789174214931	0.357776263861287
2008013	10	0.095880527222269	0.351954682713563
2008013	11	0.0960928435212591	0.343242027915239
2008013	12	0.0962088741598783	0.357089806435734
2008013	13	0.0925883821299776	0.353477461639502
2008013	14	0.0922602161862772	0.354695091177267
2008013	15	0.0901233125794443	0.355674114000737
2008013	16	0.0879620748334238	0.352080408011408
2008013	17	0.0853149720061716	0.342357879281222
2008013	18	0.0825986359673176	0.316194204477621
2008013	19	0.0792004205731434	0.294349593703784
2008013	20	0.0763144800351671	0.277845672549164
2008013	21	0.066058559422716	0.249253643568316
2008013	22	0.0475299449955335	0.182432909032941
2008013	23	0.0305768323314616	0.127402456762394
2008014	0	0.0222183106799671	0.0849698348732733
2008014	1	0.0165589974372195	0.0589483057210615
2008014	2	0.0123493583072284	0.0407848899238114
2008014	3	0.00989451393957129	0.0305084181066676
2008014	4	0.00878162197834659	0.0265864214083707
2008014	5	0.00863037042391674	0.0257233852478464
2008014	6	0.00832307403117733	0.0256740057225855
2008014	7	0.00851529980133542	0.0260234260906311
2008014	8	0.00904963048488923	0.0277385270420293
2008014	9	0.0116874588217571	0.0336351331347697
2008014	10	0.0391783510064421	0.106605525103425
2008014	11	0.0567497821470246	0.149266792972929
2008014	12	0.0640611758737184	0.16288706804457
2008014	13	0.0700803960814848	0.176712206432352
2008014	14	0.0734978946942656	0.18787859421353
2008014	15	0.0698571940637329	0.184226569500315
2008014	16	0.0617250656893826	0.167371057945193
2008014	17	0.0503851504616801	0.142689907266739
2008014	18	0.0442909165901576	0.124287835400809
2008014	19	0.0436088496865216	0.120134344029575
2008014	20	0.0463350816851442	0.12582887400204
2008014	21	0.0493641191954255	0.131637506851424
2008014	22	0.0472128454062575	0.125359394279929
2008014	23	0.0442960058270177	0.115953413292302
2008015	0	0.0414921115897013	0.108529387755855
2008015	1	0.0350092045167973	0.0935328802064597
2008015	2	0.0264183741517695	0.0695814640213999
2008015	3	0.0242782078374739	0.0616817253549893
2008015	4	0.0293984917164198	0.0728560924698846
2008015	5	0.0328013368605209	0.080368141919529
2008015	6	0.0326200076805913	0.0815708172440872
2008015	7	0.0309739475160861	0.0800910159264504
2008015	8	0.029481348787756	0.0791575006711711
2008015	9	0.0302558128362192	0.0848854077705213
2008015	10	0.0363281594012188	0.100350756516546
2008015	11	0.0419547694136862	0.113472187431704
2008015	12	0.0488630762750774	0.131082215924624
2008015	13	0.0546742240473424	0.14918623807629
2008015	14	0.0603289246961875	0.164761607247564
2008015	15	0.0575808448024687	0.149762489510929
2008015	16	0.0463066447731516	0.116181813297758
2008015	17	0.0339035319165292	0.085812799164433
2008015	18	0.0318911436496236	0.0774441837662746
2008015	19	0.030552406504037	0.077199126204807
2008015	20	0.0241809347399559	0.0623544597558559
2008015	21	0.0222929053374874	0.0573552653587994
2008015	22	0.0252701467232789	0.0644682678808946
2008015	23	0.0344102941898998	0.0880207255280134
2008016	0	0.0354951301502285	0.0915233047611495
2008016	1	0.0356084881700783	0.0907136632066204
2008016	2	0.0334834237549723	0.0860595897634169
2008016	3	0.029482466652147	0.0775676589725145
2008016	4	0.0255627408760133	0.0657282494636933
2008016	5	0.0201273265921695	0.0479942419006147
2008016	6	0.00855065790673271	0.0234788876858378
2008016	7	0.00254603630136766	0.0076270953379356
2008016	8	0.00238031112608185	0.00641604003263177
2008016	9	0.00213720410864563	0.00673828507738543
2008016	10	0.00152087843697654	0.00470953568984761
2008016	11	0.00140430667925934	0.00452353819289491
2008016	12	0.00200610979735744	0.00809600612929968
2008016	13	0.00677186868754598	0.029882951809875
2008016	14	0.0126884559672255	0.0506891691556566
2008016	15	0.0170982514032276	0.06034167565305
2008016	16	0.0184412200200284	0.0543264912401455
2008016	17	0.018314844306637	0.0436746731857929
2008016	18	0.0144936922979705	0.0326744512002525
2008016	19	0.0104866397432481	0.0256001386788288
2008016	20	0.00753241678184172	0.0209396382673028
2008016	21	0.00660099463011126	0.0193733260272699
2008016	22	0.00648340949746748	0.0200229132119613
2008016	23	0.00618763788424573	0.0199783862974119
2008017	0	0.00594325325535386	0.0197032344851445
2008017	1	0.00590652497586116	0.0201064673791352
2008017	2	0.00612539330292483	0.0227102904598499
2008017	3	0.00667817382911493	0.0265814508157247
2008017	4	0.00679112877507345	0.0286672739961139
2008017	5	0.00654183328496592	0.0290948730987168
2008017	6	0.00604533011216541	0.0284303311226165
2008017	7	0.0059902409047937	0.0278087162660581
2008017	8	0.00638788977597305	0.0279659904898751
2008017	9	0.0087322232233639	0.0367179791364751
2008017	10	0.0107613230807524	0.0382855062886631
2008017	11	0.00956377458934864	0.027585614747436
2008017	12	0.00723505349361703	0.0175541281444411
2008017	13	0.00592928406191328	0.0150221644033455
2008017	14	0.0189272690730094	0.0464377598455153
2008017	15	0.0711230401683471	0.191552403494553
2008017	16	0.0933222797199284	0.255132528592404
2008017	17	0.0848091347602318	0.244871630886862
2008017	18	0.0776474449234598	0.212806384655905
2008017	19	0.0603891971117795	0.147241528650786
2008017	20	0.0231181287744052	0.0518742544473835
2008017	21	0.018238978349183	0.0461987880632901
2008017	22	0.0263649017088765	0.0687607719304703
2008017	23	0.0443064126789841	0.0948313203700654
2008018	0	0.0757604926977863	0.11740587430171
2008018	1	0.101331593103771	0.15793316283515
2008018	2	0.0673051603002624	0.106431962023265
2008018	3	0.0330296713093839	0.0569952091434754
2008018	4	0.0103301969939223	0.0246815624136064
2008018	5	0.00535801028300366	0.0221102323376399
2008018	6	0.0132177378612616	0.0642945401678991
2008018	7	0.0192631772488727	0.0783768832347409
2008018	8	0.0210333723765849	0.0672256128180734
2008018	9	0.0135108319555949	0.0351759023638498
2008018	10	0.00852668068543837	0.0241255936190227
2008018	11	0.0262304294664994	0.103534133918766
2008018	12	0.0331024286090745	0.114654017858061
2008018	13	0.0192654944733607	0.0578150901832344
2008018	14	0.0114449362914499	0.0362998333973917
2008018	15	0.0168619116233511	0.0597810448002377
2008018	16	0.0250972449545602	0.0821319499624837
2008018	17	0.0317406734355131	0.0868862809335528
2008018	18	0.0310578663040482	0.0717208920849185
2008018	19	0.0372688307234849	0.076625851504893
2008018	20	0.0357068938129861	0.0643424614250038
2008018	21	0.0305024572103555	0.0537417059175342
2008018	22	0.085537199377859	0.158714347572903
2008018	23	0.244065511610718	0.504250673237148
2008019	0	0.212185168234742	0.436808105726984
2008019	1	0.163584857121814	0.359239092928653
2008019	2	0.185451241492179	0.514814009386994
2008019	3	0.189378882408449	0.690806496032157
2008019	4	0.1807206857067	0.753845981787085
2008019	5	0.139012294004368	0.625874204481232
2008019	6	0.0969235519320596	0.394484772665317
2008019	7	0.0659482663430979	0.266234804755553
2008019	8	0.0467579182622491	0.182736334304788
2008019	9	0.0270619644502532	0.101434650555578
2008019	10	0.0138595496798654	0.0488750162450058
2008019	11	0.00836706460454623	0.0297880631444312
2008019	12	0.00546495649713395	0.0205564578523879
2008019	13	0.00320643967885371	0.0117567920379792
2008019	14	0.0014751448813786	0.00570535165278348
2008019	15	0.000308733749865313	0.00140084095678438
2008019	16	0.000759637445487137	0.00402487018255858
2008019	17	0.010836245918418	0.0441703371395868
2008019	18	0.0418836389640085	0.161253972713406
2008019	19	0.0759182416453493	0.253222519913386
2008019	20	0.100862678655446	0.274078287597485
2008019	21	0.116356216358769	0.267995437882774
2008019	22	0.117235298549103	0.256462022845917
2008019	23	0.119607475447471	0.261522659423414
2008020	0	0.116541775276529	0.273534073073912
2008020	1	0.116211608577852	0.278822910571532
2008020	2	0.111170467342289	0.271950125003943
2008020	3	0.102038113391329	0.261291402653541
2008020	4	0.0942774510645742	0.246331823630551
2008020	5	0.0844170329298535	0.217861927025842
2008020	6	0.0442226850988029	0.107683666192842
2008020	7	0.0292029245914567	0.0697491495641775
2008020	8	0.0272733668893455	0.0626838752149039
2008020	9	0.00328990878257874	0.00765402832107263
2008020	10	0.00102930895980439	0.00224155245692467
2008020	11	0.00748366212523135	0.0193507254535688
2008020	12	0.0178247312293323	0.0433091867269139
2008020	13	0.0208696076534076	0.0594115195085171
2008020	14	0.0196302999205529	0.0578044444083075
2008020	15	0.0122374290044353	0.0424503551222391
2008020	16	0.010363230660466	0.0445252921807113
2008020	17	0.0140613844255791	0.0691444232371365
2008020	18	0.016107922947281	0.0851191342800328
2008020	19	0.0129547071771901	0.0682139598471319
2008020	20	0.00973370543547075	0.0480171934536742
2008020	21	0.0064143038328607	0.0273800247854402
2008020	22	0.00355322005084394	0.0115122838039689
2008020	23	0.00206672870969838	0.0057270824070369
2008021	0	0.00134392161650787	0.00491788556030881
2008021	1	0.00569287684363718	0.0242619216692737
2008021	2	0.0444867619856726	0.157613021956997
2008021	3	0.0250586372159711	0.0907209473138313
2008021	4	0.0182581536765525	0.0640563676899526
2008021	5	0.00920836972275868	0.0377236437125912
2008021	6	0.00235224574233883	0.0120962925338239
2008021	7	0.00323771343931533	0.0199418308479581
2008021	8	0.00454710356885483	0.0221142486702297
2008021	9	0.0278348964534711	0.124027922663198
2008021	10	0.037592285795994	0.153889856843548
2008021	11	0.055495235054578	0.232537065444395
2008021	12	0.0646211712176175	0.226122988279661
2008021	13	0.0456051657044991	0.12364843109346
2008021	14	0.0376436111332571	0.0998057103971765
2008021	15	0.0320525486446795	0.0792254260233137
2008021	16	0.0293242532874066	0.0790542142445255
2008021	17	0.0270093732444182	0.0862607002059182
2008021	18	0.0199224835791234	0.057488160742074
2008021	19	0.0459640662152037	0.124644789224222
2008021	20	0.0506448926324592	0.114008469189706
2008021	21	0.0421594969597724	0.0751052556342211
2008021	22	0.0353289073806571	0.065299298643402
2008021	23	0.0123158318524705	0.0294293265250682
2008022	0	0.0038241278841858	0.00885085475878142
2008022	1	0.00231136370396379	0.00547881075425807
2008022	2	0.00121069860209625	0.00345115884334734
2008022	3	0.000726371153802741	0.00266144068494002
2008022	4	0.000249248882853645	0.00107072268051027
2008022	5	0.000308618892337278	0.000864587292304932
2008022	6	0.01158621830974	0.0520564216198849
2008022	7	0.130057909389397	0.479327690766856
2008022	8	0.199424467369844	0.579779509604991
2008022	9	0.292263095197886	0.715220161078566
2008022	10	0.291779313659662	0.676527296983453
2008022	11	0.285776554221325	0.596082653079077
2008022	12	0.24989064675706	0.477255481640984
2008022	13	0.234105826312973	0.481770279057656
2008022	14	0.230087009522798	0.506151840318348
2008022	15	0.220322718575907	0.547168928328982
2008022	16	0.203861099980494	0.575629830042665
2008022	17	0.191335568531628	0.618695998363714
2008022	18	0.198315439803078	0.681389669127734
2008022	19	0.180768931686685	0.746575265341183
2008022	20	0.190191923428744	0.796357036254075
2008022	21	0.176542176067873	0.764458494565125
2008022	22	0.153434436629624	0.714489553008772
2008022	23	0.135509520315858	0.665358961795843
2008023	0	0.115168922571804	0.61053541397739
2008023	1	0.091664270318034	0.564671206227934
2008023	2	0.0836928873276706	0.534848616493613
2008023	3	0.081831509588901	0.553447975511095
2008023	4	0.108315200184778	0.697331928642335
2008023	5	0.16204235869542	0.84715178961499
2008023	6	0.222356158244851	0.879449944224675
2008023	7	0.26989049676785	0.927130107001747
2008023	8	0.278909036054641	0.909640974460442
2008023	9	0.311301162741386	0.878523179942505
2008023	10	0.337788453975947	0.841649177877949
2008023	11	0.310492297432388	0.794971873691428
2008023	12	0.350292004989585	0.810094800832338
2008023	13	0.350385040693747	0.806001686255414
2008023	14	0.35880540267598	0.774204396448565
2008023	15	0.319324571945562	0.656345339209152
2008023	16	0.244999497940269	0.489150605057006
2008023	17	0.191704585044842	0.37194342578244
2008023	18	0.150644498885003	0.305564093943999
2008023	19	0.134294580956184	0.281197490396458
2008023	20	0.127593439860005	0.259183976434107
2008023	21	0.0627281558196851	0.122782133529039
2008023	22	0.0173307660655287	0.0337276074466118
2008023	23	0.0238284565992605	0.0567379865927246
2008024	0	0.0472224575407444	0.137730184518239
2008024	1	0.0702613330554364	0.246493231617478
2008024	2	0.0819152801016473	0.307514962651812
2008024	3	0.0896944241892515	0.332099234541648
2008024	4	0.0815454968900859	0.363468237627038
2008024	5	0.0833647983087152	0.401489716657932
2008024	6	0.0754986343106155	0.441587727665196
2008024	7	0.0793937705617741	0.479526731769722
2008024	8	0.0749989423311412	0.457768841440751
2008024	9	0.087907413298403	0.413217768781638
2008024	10	0.0995770590411037	0.38820662786531
2008024	11	0.114022133877289	0.401815627979142
2008024	12	0.119450846669447	0.40051836528733
2008024	13	0.112509605697015	0.396124081196728
2008024	14	0.094523043749414	0.39466118592865
2008024	15	0.0886826993001705	0.407528634475784
2008024	16	0.082705722747749	0.359092900121278
2008024	17	0.0298485207858203	0.136025588669475
2008024	18	0.0123187285744419	0.0513905382742137
2008024	19	0.0451107680740216	0.159533854284729
2008024	20	0.0708147997576432	0.219600570851076
2008024	21	0.0844391455999601	0.234389499202167
2008024	22	0.0726862995191132	0.206613429516829
2008024	23	0.0587748297760651	0.203513981112115
2008025	0	0.084811243409053	0.297347852838327
2008025	1	0.0982032054683071	0.33720094474403
2008025	2	0.0995372714196711	0.382642587307469
2008025	3	0.10636236464056	0.439782279534435
2008025	4	0.101153788340107	0.423599088569624
2008025	5	0.0924063820517719	0.374379280251616
2008025	6	0.077642136464436	0.363042100137605
2008025	7	0.107081916143075	0.425365210329274
2008025	8	0.119793514614858	0.454535731261121
2008025	9	0.165898160244666	0.454590371719577
2008025	10	0.178949867904023	0.386872216138849
2008025	11	0.157909607681748	0.322404133089021
2008025	12	0.154868219063604	0.309145974253426
2008025	13	0.14100870172193	0.277922323617009
2008025	14	0.139690543722328	0.289319321717687
2008025	15	0.168902383300269	0.345227753442376
2008025	16	0.187483410752903	0.380305478125974
2008025	17	0.191088340641306	0.385642849565442
2008025	18	0.205355971812056	0.422564848740984
2008025	19	0.218668773899949	0.462207346459288
2008025	20	0.227306805469228	0.498138567576189
2008025	21	0.234843780981043	0.546830076867914
2008025	22	0.263832271231519	0.643106159543754
2008025	23	0.301632878418236	0.724115940854736
2008026	0	0.317308521359237	0.743471096874759
2008026	1	0.30391314843031	0.696249799241336
2008026	2	0.27015818671558	0.60855526190044
2008026	3	0.216780594938995	0.534633910691167
2008026	4	0.170426627069779	0.467803971600144
2008026	5	0.151987847047745	0.434202639789287
2008026	6	0.146565710320544	0.445467825141415
2008026	7	0.145561766092376	0.479647355417999
2008026	8	0.147320664840181	0.510242766489566
2008026	9	0.16435558014818	0.552061776530647
2008026	10	0.202572694605058	0.664761149087448
2008026	11	0.256675493397853	0.767061377438938
2008026	12	0.286486128852104	0.775879693700114
2008026	13	0.27709808771049	0.673239946425528
2008026	14	0.214096767579951	0.578173430724305
2008026	15	0.173384462060006	0.557618695451382
2008026	16	0.141940659470929	0.526572151938669
2008026	17	0.120465231595621	0.526294216919407
2008026	18	0.10603194332855	0.514313053760511
2008026	19	0.0830234341723367	0.441825944910084
2008026	20	0.0676326198235389	0.373365458954454
2008026	21	0.0763652676727279	0.401643253412998
2008026	22	0.116247275080234	0.593085068463875
2008026	23	0.164411742984438	0.845109338571466
2008027	0	0.174339407199713	0.905033399897062
2008027	1	0.170975330315107	0.8485483245328
2008027	2	0.168396953167698	0.833258546531304
2008027	3	0.155522152806416	0.789569486174562
2008027	4	0.127253004048645	0.634366430404996
2008027	5	0.0891622094082635	0.366616798145385
2008027	6	0.0455610877157788	0.149018758218705
2008027	7	0.0125143013846477	0.0386539784592238
2008027	8	0.00249163037582611	0.0077842865519092
2008027	9	0.000736121339072346	0.00212982570305173
2008027	10	0.000457718394775264	0.00143364909443875
2008027	11	0.000968353570652672	0.00460586161530519
2008027	12	0.00269933717574305	0.0132964073660895
2008027	13	0.00414821879740376	0.0208266634022497
2008027	14	0.00440016265445294	0.0234051613530702
2008027	15	0.00635188115026672	0.0364135123272605
2008027	16	0.0112926519083757	0.0693065750494895
2008027	17	0.0230299758247604	0.148524648359116
2008027	18	0.0454249195817569	0.274556288247785
2008027	19	0.0740577101473016	0.413364881868775
2008027	20	0.0951995863012402	0.466022899828382
2008027	21	0.107139022980468	0.480070004776676
2008027	22	0.10027775851475	0.454168967396463
2008027	23	0.0934379941328524	0.439675450884561
2008028	0	0.093800561440294	0.457177692333833
2008028	1	0.0905793865481568	0.449010591336533
2008028	2	0.0752407667901145	0.414138254675997
2008028	3	0.0692735003078018	0.366401794760478
2008028	4	0.0594139185779746	0.307582764575903
2008028	5	0.0471743350346407	0.244108229333721
2008028	6	0.0394999105752071	0.1831356707213
2008028	7	0.0354165901238566	0.135069341175674
2008028	8	0.0335960343674406	0.105323710332377
2008028	9	0.0331244532201749	0.0855793043184822
2008028	10	0.0376329824144684	0.0835101895368818
2008028	11	0.0570424038412062	0.127101766262584
2008028	12	0.119813935164289	0.363107439291575
2008028	13	0.2476514354849	0.894450457381222
2008028	14	0.297924009758032	1.06237112951465
2008028	15	0.278680452063755	1.01471591956296
2008028	16	0.249965902659706	0.934037767266237
2008028	17	0.216260985494136	0.84128996890927
2008028	18	0.195072010982187	0.774793211075742
2008028	19	0.215212680486938	0.733739826864097
2008028	20	0.251374931317565	0.779873190000474
2008028	21	0.27412708450891	0.832522261210692
2008028	22	0.291723421794726	0.869463055373916
2008028	23	0.323700189335614	0.882043982645125
2008029	0	0.316956389814643	0.921698086563132
2008029	1	0.308373089170589	0.997523473930974
2008029	2	0.276212403024864	1.01476432047043
2008029	3	0.247398758449574	0.990360449910312
2008029	4	0.239486073982677	0.961246467528778
2008029	5	0.213528370816707	0.924923631021267
2008029	6	0.206783190121918	0.885313322351387
2008029	7	0.200526226497599	0.848297739385999
2008029	8	0.196895641097818	0.81518538811946
2008029	9	0.227292822747073	0.891401433563498
2008029	10	0.278031469349373	1.06396886830727
2008029	11	0.246606807517576	0.882989727194332
2008029	12	0.242090141984862	0.802551885075007
2008029	13	0.248484290151097	0.815269700208435
2008029	14	0.241303201972982	0.854965120740744
2008029	15	0.233267247136306	0.89315884242681
2008029	16	0.218423115590829	0.897518379058696
2008029	17	0.20833534814542	0.871882966665232
2008029	18	0.205724812988273	0.843162967774814
2008029	19	0.191039418025493	0.825750738419043
2008029	20	0.184814143179437	0.820455996160201
2008029	21	0.183829741391087	0.820701629947346
2008029	22	0.182976361643773	0.81134046545603
2008029	23	0.18794088589026	0.780172791412727
2008030	0	0.169012235351351	0.690648102612701
2008030	1	0.152847238368796	0.591602493719234
2008030	2	0.145948258023588	0.544068042191523
2008030	3	0.149560752722529	0.532929663412488
2008030	4	0.156539792578987	0.539095928071103
2008030	5	0.161531956475556	0.553591238447198
2008030	6	0.158362562360464	0.560421251387156
2008030	7	0.148610455785014	0.553463883102182
2008030	8	0.132848955268107	0.551625856395106
2008030	9	0.155775267461006	0.654694072961729
2008030	10	0.173838263104623	0.62853872523768
2008030	11	0.208731350290381	0.693444875529515
2008030	12	0.183662078124154	0.593728362628953
2008030	13	0.159716160836201	0.519374985316425
2008030	14	0.156656805749778	0.51998817132725
2008030	15	0.170967288720061	0.54333937487292
2008030	16	0.127716021355901	0.492791044925142
2008030	17	0.0700048854183407	0.282405515642525
2008030	18	0.0317414458590019	0.139219484881986
2008030	19	0.0431169093807902	0.193232767204507
2008030	20	0.0598825930270131	0.258283387565557
2008030	21	0.0776897694605802	0.269524059074557
2008030	22	0.104651649978303	0.363880574904836
2008030	23	0.207520801865867	0.810453040095805
2008031	0	0.286495296014273	1.26294799745891
2008031	1	0.255214602271867	1.29550453961454
2008031	2	0.203380614385772	1.12660703969326
2008031	3	0.156499632027847	0.956814961086422
2008031	4	0.141665252083235	0.85895665625596
2008031	5	0.128378624325055	0.772327405612398
2008031	6	0.129636662617242	0.707048370807873
2008031	7	0.12277150442354	0.680035489074081
2008031	8	0.138044637341864	0.688221434131698
2008031	9	0.164206503717699	0.71809949629642
2008031	10	0.188719447111695	0.778373430201496
2008031	11	0.221239457403214	0.756947941336557
2008031	12	0.262183579981561	0.72326990968931
2008031	13	0.272341406434967	0.6232061637033
2008031	14	0.246171374791914	0.552937139450198
2008031	15	0.21715891873534	0.505043795371107
2008031	16	0.185739764442132	0.441643054096788
2008031	17	0.18271021557239	0.410018757513808
2008031	18	0.19739671558512	0.399159153979975
2008031	19	0.206293834357385	0.378340889956694
2008031	20	0.163426023567459	0.297624488072373
2008031	21	0.130154996053381	0.251078371701434
2008031	22	0.161283952383401	0.275584183912152
2008031	23	0.126396697339081	0.210225412614498
2008032	0	0.0999336615187815	0.168908568783119
2008032	1	0.0854444317175047	0.143416447598846
2008032	2	0.0622147349400812	0.108258648215123
2008032	3	0.0371237671792689	0.0719398554814231
2008032	4	0.0266134878314414	0.0488241330767044
2008032	5	0.0232288304055407	0.0413231931017639
2008032	6	0.0213689322362464	0.0382147087173485
2008032	7	0.0184412887671881	0.035873953944791
2008032	8	0.0214024775083412	0.0516931833850779
2008032	9	0.0280294149754283	0.0760216372019978
2008032	10	0.0351049673066976	0.0998312068210942
2008032	11	0.0443525805771531	0.128411192862992
2008032	12	0.0605953199444579	0.178655609234765
2008032	13	0.0675795104908712	0.19313656495367
2008032	14	0.0732234648553982	0.213561978369083
2008032	15	0.0807371428627273	0.242670564991381
2008032	16	0.0799745742047587	0.234215537773865
2008032	17	0.0755653778155458	0.208236773603143
2008032	18	0.0723739222140012	0.19565060594252
2008032	19	0.0715772823783757	0.191378898732509
2008032	20	0.0672248983014467	0.169707207466902
2008032	21	0.0638172804253617	0.156887262777735
2008032	22	0.0618996662869635	0.15151485471829
2008032	23	0.0875251233745596	0.18224143188377
2008033	0	0.119092998250234	0.23334066653948
2008033	1	0.0935515255926777	0.253474826563517
2008033	2	0.101008007286177	0.277237409686161
2008033	3	0.10898295280151	0.301618949680665
2008033	4	0.167941639683835	0.454929058112425
2008033	5	0.205984887076663	0.709338370794218
2008033	6	0.168758579185293	0.714208414786111
2008033	7	0.131021968447516	0.677435975574047
2008033	8	0.202780094901901	0.996868301362261
2008033	9	0.246715230112449	1.09342577328539
2008033	10	0.260241732641076	1.07377719679523
2008033	11	0.262464829668331	1.03782589262377
2008033	12	0.237342289740821	0.945341569904993
2008033	13	0.15539693889157	0.593391353170608
2008033	14	0.178059664164277	0.695400561529239
2008033	15	0.19122651000539	0.743075043302593
2008033	16	0.126984842757388	0.466676613652083
2008033	17	0.0948634288919634	0.313832961638014
2008033	18	0.127170125724113	0.384275850424573
2008033	19	0.171864307874674	0.478212966048616
2008033	20	0.17349049105594	0.447915128258653
2008033	21	0.169615551516623	0.393295586162633
2008033	22	0.155932100726016	0.288511305313382
2008033	23	0.132030096805108	0.223063331210012
2008034	0	0.130100204543739	0.219585700033625
2008034	1	0.134339852348612	0.221251011109278
2008034	2	0.133272358180893	0.213384136658703
2008034	3	0.12857661095172	0.203109795061646
2008034	4	0.120965452709672	0.193324444192983
2008034	5	0.114421609392698	0.184765238243407
2008034	6	0.110443518353739	0.178295933216134
2008034	7	0.106961751919828	0.172502009387254
2008034	8	0.102635553533581	0.164519865984245
2008034	9	0.109641428487091	0.173309688078577
2008034	10	0.114652676486292	0.167789800777181
2008034	11	0.0978909308978413	0.133542298747288
2008034	12	0.0859332523553311	0.117622335137659
2008034	13	0.0918306220924504	0.140714269284541
2008034	14	0.106145695372148	0.169467339416958
2008034	15	0.104217827780506	0.164858090394855
2008034	16	0.0846434621468078	0.146151787388751
2008034	17	0.0732563857974504	0.12048314065444
2008034	18	0.0721344186088505	0.112989525110696
2008034	19	0.070395868307821	0.106058892123068
2008034	20	0.0714740113815247	0.103915806877341
2008034	21	0.0707223016209158	0.0970044428508489
2008034	22	0.0668616473184715	0.0872440072448644
2008034	23	0.0639976283247231	0.0817507113653319
2008035	0	0.0625370521941224	0.0808774334548517
2008035	1	0.063839570253638	0.0867599096441865
2008035	2	0.0661224291209823	0.0957252323200229
2008035	3	0.0686465093125364	0.1089466533297
2008035	4	0.0723805442815387	0.127658041724945
2008035	5	0.0767117961070668	0.143073741915818
2008035	6	0.0787598068360653	0.147728676354915
2008035	7	0.0766983542406828	0.147447179365828
2008035	8	0.0770791384964648	0.146849015257621
2008035	9	0.084254283657789	0.16421667879874
2008035	10	0.0848729038164313	0.165228986557783
2008035	11	0.0784348103425649	0.151850598154157
2008035	12	0.0683148468126187	0.130905381022079
2008035	13	0.0563111020523791	0.107751274005
2008035	14	0.0500039803077642	0.098767216227307
2008035	15	0.0548446746959204	0.107921471163503
2008035	16	0.0616076198176789	0.112241427170584
2008035	17	0.0550827404609951	0.102701782199892
2008035	18	0.0289052371412476	0.0732176363143695
2008035	19	0.0229283704515273	0.0978194613624052
2008035	20	0.0233310721215367	0.10409438115843
2008035	21	0.0251209369787179	0.0890738244400062
2008035	22	0.0193326844504521	0.0546065986458111
2008035	23	0.0142298705058779	0.0364174578612735
2008036	0	0.0125030260379794	0.0315269310445951
2008036	1	0.0154994040144134	0.0395422369052873
2008036	2	0.0224953048180064	0.0541826660199613
2008036	3	0.0330494834660482	0.0975150711763736
2008036	4	0.0393497627191439	0.102419351978506
2008036	5	0.0452136973943894	0.0951385646762532
2008036	6	0.0540586953762053	0.110497196585852
2008036	7	0.0840869227042848	0.198164944390803
2008036	8	0.105649942007166	0.26649112164279
2008036	9	0.111206209937887	0.28770601885309
2008036	10	0.115605821104919	0.302203621657022
2008036	11	0.133850475250897	0.312594038443322
2008036	12	0.126637129312758	0.270960943086583
2008036	13	0.108171924155645	0.219629233489927
2008036	14	0.0949815068152823	0.19188546678901
2008036	15	0.0891446884923313	0.189338863805279
2008036	16	0.0876182586228996	0.197883990901272
2008036	17	0.0971439754713836	0.20143736889551
2008036	18	0.0898063197994941	0.178074295814942
2008036	19	0.0540725340372937	0.115441170158737
2008036	20	0.0249285256226857	0.05486145429602
2008036	21	0.0242258817877735	0.0530175724144102
2008036	22	0.0566185634866759	0.127203946396303
2008036	23	0.0426589851620409	0.121125238078834
2008037	0	0.00313739718025177	0.0085419547724692
2008037	1	0.00536498534937578	0.0192875450694568
2008037	2	0.0173906539205879	0.0811147109924059
2008037	3	0.0416909207402065	0.220453516023325
2008037	4	0.0441824542318916	0.240511802756561
2008037	5	0.0322707215899391	0.159616740640663
2008037	6	0.0257712592767894	0.117938939849447
2008037	7	0.0190617572306477	0.0888811127991856
2008037	8	0.0315653845380491	0.177655509435184
2008037	9	0.0555480796423961	0.321071291235681
2008037	10	0.032079516466865	0.215766880785561
2008037	11	0.0168645739309612	0.0989040745715586
2008037	12	0.0169320892343915	0.0790250596487151
2008037	13	0.00412033502671183	0.017035147448664
2008037	14	0.110025214919936	0.461776107902343
2008037	15	0.129851248989772	0.487086344802548
2008037	16	0.103156374475176	0.389456746601281
2008037	17	0.116379950405952	0.450075929274411
2008037	18	0.129499039566623	0.498129937647548
2008037	19	0.139365656876992	0.543631560273318
2008037	20	0.140566948719183	0.625861411092534
2008037	21	0.143751264708145	0.71649784302248
2008037	22	0.129391377248282	0.685579220257402
2008037	23	0.106421773908903	0.563845221650303
2008038	0	0.092140503502647	0.482980842130362
2008038	1	0.128132302918381	0.680628425493447
2008038	2	0.174830133250768	0.94931582941633
2008038	3	0.185700159160605	0.943604078233129
2008038	4	0.153544443038142	0.754025235614871
2008038	5	0.146786091168709	0.779665275554814
2008038	6	0.1367738755712	0.753655564628642
2008038	7	0.138137210326327	0.760693877727638
2008038	8	0.145120570035238	0.766406121017363
2008038	9	0.15985101466461	0.744329237326407
2008038	10	0.176030300109364	0.735469841592066
2008038	11	0.17494470943101	0.676953891563844
2008038	12	0.173890571068842	0.640429267810532
2008038	13	0.177570469658876	0.59880608530039
2008038	14	0.194212547531027	0.516403187311622
2008038	15	0.204744485875201	0.425134748336657
2008038	16	0.204833169033348	0.465313832726908
2008038	17	0.208244303846927	0.546625072126552
2008038	18	0.217754945167383	0.619058293553975
2008038	19	0.211683791376259	0.638391735827851
2008038	20	0.211661854880218	0.641562866602413
2008038	21	0.2088941073916	0.638525787389075
2008038	22	0.216200690809529	0.651611398195485
2008038	23	0.22044365598497	0.666950157864509
2008039	0	0.230928894654411	0.704136451481269
2008039	1	0.253076794588483	0.746876429331869
2008039	2	0.264688140989961	0.764663726752098
2008039	3	0.264371497195491	0.761141600358144
2008039	4	0.263441686182701	0.747396075497485
2008039	5	0.256681113663541	0.727151465924284
2008039	6	0.245119605374375	0.706585295707649
2008039	7	0.229701005559032	0.684489692468315
2008039	8	0.234218055935098	0.715134903263905
2008039	9	0.229179667219577	0.712526257472858
2008039	10	0.238899478285434	0.746896390079567
2008039	11	0.231854423829979	0.737651114615749
2008039	12	0.230089067623005	0.749701431055331
2008039	13	0.229060717153962	0.751536128671036
2008039	14	0.222225085583742	0.739285145317342
2008039	15	0.218441830653552	0.729970732134416
2008039	16	0.209837587025338	0.70819597273691
2008039	17	0.201911796977915	0.68407579717943
2008039	18	0.191900766751038	0.650551334668647
2008039	19	0.184314074681523	0.61907007358762
2008039	20	0.176146548764746	0.587584567427791
2008039	21	0.168845615893299	0.562978866859787
2008039	22	0.159979841195043	0.544677311740802
2008039	23	0.156678837384858	0.542006365317762
2008040	0	0.15204466897713	0.527293733890515
2008040	1	0.147643257634931	0.509090005346198
2008040	2	0.145101144896718	0.493769996655588
2008040	3	0.147004461376756	0.486877344655193
2008040	4	0.150235222491663	0.479997018609021
2008040	5	0.153738065257703	0.474501080120487
2008040	6	0.154755187181878	0.472195054922094
2008040	7	0.154358800558767	0.476773611270575
2008040	8	0.150702050508119	0.470507526321186
2008040	9	0.150030937352626	0.461740176073659
2008040	10	0.163949567520075	0.489675977402604
2008040	11	0.140208562497903	0.41857195067023
2008040	12	0.1170843969399	0.357876773374665
2008040	13	0.10327073337678	0.32127566714164
2008040	14	0.0909289435623812	0.289668053572178
2008040	15	0.0794052026994243	0.258621754065997
2008040	16	0.0684055937241002	0.232299842487415
2008040	17	0.06052041806736	0.210124263907546
2008040	18	0.0548728242477568	0.191754061112296
2008040	19	0.0504132185074202	0.173349256051032
2008040	20	0.0467526814104888	0.1575729429418
2008040	21	0.0442260391435623	0.143692644974026
2008040	22	0.0413521621704286	0.131615047177808
2008040	23	0.038906434711831	0.122570098914327
2008041	0	0.0388172818092538	0.119668212179365
2008041	1	0.0376525508534945	0.111717931100878
2008041	2	0.0348704655878379	0.0995475603742386
2008041	3	0.0323930976791823	0.0899666497462078
2008041	4	0.0304437274988313	0.0823797619804535
2008041	5	0.0287181514827018	0.0768015065428334
2008041	6	0.0273276898024363	0.0722748835313071
2008041	7	0.0261820314068115	0.0683042534735184
2008041	8	0.0250293122906154	0.0667526820211338
2008041	9	0.0281971416834351	0.0867378585657019
2008041	10	0.0346815007649665	0.109696643036629
2008041	11	0.0407858477769328	0.130182483373959
2008041	12	0.0419109556541956	0.127639810026672
2008041	13	0.0443698293857127	0.139867028080532
2008041	14	0.0432822068244778	0.145522835821308
2008041	15	0.0396000738047135	0.142223054427658
2008041	16	0.0354952466976737	0.137903812562362
2008041	17	0.0316292229680702	0.13091306701026
2008041	18	0.0287849816953109	0.120618386397827
2008041	19	0.0270546271067362	0.111214423218791
2008041	20	0.0256960461116331	0.103299864522435
2008041	21	0.0253070419283132	0.0976062705892124
2008041	22	0.0244659385662921	0.0932742987918865
2008041	23	0.0242279613292466	0.0902918842560918
2008042	0	0.0244077834760376	0.0898251300135506
2008042	1	0.0230493847849632	0.083792786138095
2008042	2	0.0217538776968751	0.077899774212082
2008042	3	0.0206308375901597	0.0729616190051405
2008042	4	0.0195432895392753	0.0691489812051614
2008042	5	0.0186669830058551	0.0660354525199197
2008042	6	0.0179014542392302	0.0633747377101454
2008042	7	0.0168553099702277	0.0590418242885902
2008042	8	0.0159313896928576	0.0545649349263659
2008042	9	0.0165660847060344	0.0585072739802742
2008042	10	0.0181627523584662	0.0674801458776099
2008042	11	0.0192843403433291	0.0748597642026408
2008042	12	0.0212634774816716	0.0864416067693096
2008042	13	0.0217994004310381	0.0915104207845441
2008042	14	0.0213000303391878	0.09146247884611
2008042	15	0.0205131534071258	0.0882692290020836
2008042	16	0.0196116141939873	0.0828079817411613
2008042	17	0.0186610759592945	0.0767179735879486
2008042	18	0.017628519511333	0.0705412272956842
2008042	19	0.0165149881986974	0.0641811043800412
2008042	20	0.0153486950039059	0.0579426649810326
2008042	21	0.0143310909192953	0.0522711417445905
2008042	22	0.0134917424442931	0.0473378953660776
2008042	23	0.0129110878960522	0.0435934259644091
2008043	0	0.0126693447512293	0.0414739562797805
2008043	1	0.0127447723425823	0.0411277511157297
2008043	2	0.0129923334266001	0.0418750212875571
2008043	3	0.0132428510481551	0.0428704801345289
2008043	4	0.0132472732096726	0.0433764832486941
2008043	5	0.0130184764330181	0.0434727280048512
2008043	6	0.0127002247113089	0.043308019003861
2008043	7	0.0123034747191448	0.0427758618453735
2008043	8	0.0116529246417198	0.0418739285712585
2008043	9	0.0111854203809928	0.0458611327863649
2008043	10	0.015580344290947	0.0746296325817262
2008043	11	0.0207304604376595	0.0993160016056388
2008043	12	0.021683609477601	0.101548110150539
2008043	13	0.0242448745565971	0.109732383403575
2008043	14	0.0230293985707277	0.105198016139469
2008043	15	0.0217088739995346	0.10341094874305
2008043	16	0.0206092861134685	0.101868156125114
2008043	17	0.0197219792525781	0.0951223892854793
2008043	18	0.0185952034605363	0.0873730465596302
2008043	19	0.0179894650112203	0.0800502496266643
2008043	20	0.0173605347624592	0.0734242304783576
2008043	21	0.0171594750703984	0.0675431277904825
2008043	22	0.0165410324166705	0.0624784160449107
2008043	23	0.0160088163766316	0.0582231384221424
2008044	0	0.0158533963033508	0.0547283498786562
2008044	1	0.0154550565553987	0.0520731611931353
2008044	2	0.0150219573625505	0.049642488631957
2008044	3	0.0144676097447328	0.0471502290270394
2008044	4	0.0139257892757539	0.0450408298647483
2008044	5	0.0131849204905086	0.0433059584748208
2008044	6	0.012770705506367	0.0417920975595977
2008044	7	0.0121718366742963	0.0403773070558924
2008044	8	0.0112463220728509	0.0389079615404969
2008044	9	0.0131451751470611	0.0522091902404426
2008044	10	0.0152220984330496	0.0596206722497884
2008044	11	0.0154711283522296	0.0588658524688923
2008044	12	0.0148878746137594	0.0547565800630579
2008044	13	0.016508467271053	0.0551332408014659
2008044	14	0.0202944327082967	0.0664178659705878
2008044	15	0.0245493739792365	0.0917619171302895
2008044	16	0.0284198489772045	0.132386786320062
2008044	17	0.0318316296818405	0.169604001217439
2008044	18	0.0319922428306508	0.186128212011671
2008044	19	0.0306128431540146	0.190661470720022
2008044	20	0.0290601390452227	0.190796042828339
2008044	21	0.0261055388994452	0.178422167980267
2008044	22	0.0233348523595095	0.168575850481283
2008044	23	0.0236945244777189	0.165728395528862
2008045	0	0.0239193438036783	0.164146645487769
2008045	1	0.0238367545417744	0.16188129763885
2008045	2	0.0257853891727131	0.160249802641335
2008045	3	0.0254076380488366	0.157733551583181
2008045	4	0.0243312160530195	0.151987116504211
2008045	5	0.0208311612302912	0.143102990436011
2008045	6	0.0170793854441083	0.129141843202462
2008045	7	0.0147089372684158	0.12139381925439
2008045	8	0.0137390533992698	0.107285382952898
2008045	9	0.0131819928139606	0.0948022347644907
2008045	10	0.0119166898319506	0.082055608168044
2008045	11	0.0107503412113936	0.0791777511760215
2008045	12	0.0135707574227078	0.101202652332543
2008045	13	0.0166904168710302	0.100909044489295
2008045	14	0.0177512970782752	0.091731714593956
2008045	15	0.0173584998232769	0.0903324099525095
2008045	16	0.0187144781430239	0.0869221264537776
2008045	17	0.0209025004209513	0.0808801029961394
2008045	18	0.0274500902457707	0.0799533072952019
2008045	19	0.0377989839298352	0.0879069158171898
2008045	20	0.0566454558024327	0.107418333381407
2008045	21	0.0765074176932264	0.121204091702463
2008045	22	0.0836165272802378	0.123989410906051
2008045	23	0.0736639749880078	0.10658072558884
2008046	0	0.0588335921110582	0.0774848820202603
2008046	1	0.0459491076597354	0.0577301605341134
2008046	2	0.0356758023528114	0.0453831113315861
2008046	3	0.0327485161428041	0.0423950181558473
2008046	4	0.0344956172562184	0.0489636052824096
2008046	5	0.0526012433271185	0.0902179265009328
2008046	6	0.0635724342185068	0.124436857031429
2008046	7	0.0660609238995	0.125655744190799
2008046	8	0.0846265603822865	0.172667443461114
2008046	9	0.23360900276583	0.516411088227033
2008046	10	0.321220254927749	0.652998819405596
2008046	11	0.322783592585661	0.609281764298923
2008046	12	0.264602865581563	0.44435857197546
2008046	13	0.203469270636382	0.324791162632125
2008046	14	0.1666193161062	0.265016851726257
2008046	15	0.138846863313021	0.225218980043764
2008046	16	0.119144686693934	0.200087502184784
2008046	17	0.108285373381018	0.189619488989623
2008046	18	0.100385362497208	0.182814363340512
2008046	19	0.0955270894310268	0.172899018765845
2008046	20	0.0843368908555215	0.144738193520161
2008046	21	0.0750594333282859	0.128313261941888
2008046	22	0.0837672121141542	0.152158344808864
2008046	23	0.107116643070586	0.228747099693911
2008047	0	0.133379481380672	0.315547170491496
2008047	1	0.153507498691862	0.391415743292928
2008047	2	0.165355377398303	0.464381427381443
2008047	3	0.184542984380635	0.525778452265767
2008047	4	0.199178040946203	0.540669092647735
2008047	5	0.195079632593955	0.530976511824605
2008047	6	0.186848047080462	0.507065659604727
2008047	7	0.173782901113546	0.469721917547996
2008047	8	0.169254171116255	0.465942728408321
2008047	9	0.190789902838038	0.509598875134415
2008047	10	0.206653313622864	0.558389388419788
2008047	11	0.225057931262137	0.595852233260355
2008047	12	0.232321736907873	0.595830721618755
2008047	13	0.237399817636627	0.582755535195639
2008047	14	0.243609469251302	0.570729072414827
2008047	15	0.240925215850497	0.554718662580202
2008047	16	0.230654445110288	0.536933706511352
2008047	17	0.221220557107553	0.515512498967311
2008047	18	0.212176601334814	0.488619006446166
2008047	19	0.201757557807584	0.456653365264564
2008047	20	0.187328928424266	0.420873713574479
2008047	21	0.167278837833269	0.382138565743854
2008047	22	0.143696432917138	0.34013604469808
2008047	23	0.123966490272274	0.2904403551317
2008048	0	0.10541303935256	0.238450792033126
2008048	1	0.0905217491790024	0.198865043550949
2008048	2	0.0843285061658191	0.179371723851995
2008048	3	0.0821263516651626	0.172066497758536
2008048	4	0.0835841850207493	0.172259300006961
2008048	5	0.0850802421928251	0.174502716901158
2008048	6	0.0874406998514728	0.184069622738022
2008048	7	0.0878237613908506	0.17965847378982
2008048	8	0.0862915580343624	0.160169031530046
2008048	9	0.0958136811361126	0.168404049457247
2008048	10	0.113880860244116	0.197578373972776
2008048	11	0.125439181731726	0.213900113483826
2008048	12	0.128870289078849	0.21445131327363
2008048	13	0.117173429775722	0.195278079061784
2008048	14	0.106456908202136	0.180655929836724
2008048	15	0.0961198206186111	0.167273038236781
2008048	16	0.0880423255654377	0.156947421515571
2008048	17	0.0803668948638667	0.143225709656912
2008048	18	0.0714795725699595	0.126675874821966
2008048	19	0.0635564110723877	0.112216517560495
2008048	20	0.0552222778870506	0.0965695123023485
2008048	21	0.0488253761460789	0.0843453936114752
2008048	22	0.0444573579641457	0.076924886871647
2008048	23	0.0446085096195496	0.0797488948838198
2008049	0	0.0459872397125891	0.0836341544449001
2008049	1	0.0462277682616749	0.0852530895873035
2008049	2	0.0444562950447461	0.0836162103286119
2008049	3	0.0408024331589614	0.0779518748691232
2008049	4	0.0370213657216604	0.072068418018417
2008049	5	0.03590344894196	0.0694891046822625
2008049	6	0.0368467814490555	0.0706972868175517
2008049	7	0.0384800628480999	0.0757554247688596
2008049	8	0.0559211424404757	0.119269679389586
2008049	9	0.0613556481911562	0.138872433405109
2008049	10	0.0701772467728296	0.16977012185524
2008049	11	0.0801352737958872	0.215127308728208
2008049	12	0.0965794061817094	0.285737546653102
2008049	13	0.105274249770744	0.337246793168634
2008049	14	0.105241734246407	0.351140596070007
2008049	15	0.0950947212688248	0.350151256476879
2008049	16	0.0856689702002821	0.339327599635717
2008049	17	0.0779132080990556	0.335610592339717
2008049	18	0.0697783649216383	0.345461342407829
2008049	19	0.0804654645653417	0.422933116406289
2008049	20	0.0934847488795859	0.581967421620017
2008049	21	0.0911407721549137	0.693311991586622
2008049	22	0.0896697151877647	0.671632842429209
2008049	23	0.0929117536110714	0.661440995528198
2008050	0	0.0877850659094273	0.609734477661709
2008050	1	0.0839212061312443	0.569224621129421
2008050	2	0.0849292543831707	0.540482196629329
2008050	3	0.0869295304495934	0.516736892834084
2008050	4	0.0899645328903347	0.511819433070998
2008050	5	0.0965154966158407	0.534443769193682
2008050	6	0.110753318880796	0.605467310881811
2008050	7	0.125036796205837	0.6944093875816
2008050	8	0.125775800755763	0.748096266301806
2008050	9	0.142657185170333	0.874061355074425
2008050	10	0.21945434095778	1.25111095802174
2008050	11	0.22061897339735	1.19747996997572
2008050	12	0.276302163241586	1.1931605912601
2008050	13	0.300490313578016	1.23659502161712
2008050	14	0.301841086178115	1.27583610494421
2008050	15	0.2132891836351	1.29600533465746
2008050	16	0.2049119010779	1.29013120671521
2008050	17	0.182917911704281	1.20352576909278
2008050	18	0.167371077514386	1.12197526978607
2008050	19	0.159333532219028	1.04179359374779
2008050	20	0.153856548101361	0.951095637655285
2008050	21	0.147708757050388	0.852177338270613
2008050	22	0.137481154527315	0.749655192743031
2008050	23	0.119700042878319	0.631668647867554
2008051	0	0.0951245736572522	0.491433168239994
2008051	1	0.0695237345467766	0.358562304018599
2008051	2	0.0570470162368438	0.278349970393445
2008051	3	0.0624174864512571	0.280243713806615
2008051	4	0.0704136960607337	0.312490216633959
2008051	5	0.0888441949381794	0.392822983649337
2008051	6	0.115614105772447	0.511135176140773
2008051	7	0.135557254824936	0.590664521115038
2008051	8	0.175489514799739	0.722304425745424
2008051	9	0.158576176469073	0.601140719743703
2008051	10	0.147342194258086	0.52779204702398
2008051	11	0.150112584850234	0.485853492345316
2008051	12	0.150050075625253	0.442169727253043
2008051	13	0.145988938006618	0.401500389956043
2008051	14	0.131383949582271	0.352836442150393
2008051	15	0.104166148620675	0.30218324581427
2008051	16	0.0797351449696076	0.251838899514499
2008051	17	0.0532522741641	0.184886966818903
2008051	18	0.0271197559240262	0.106307993996953
2008051	19	0.0109172041840996	0.0435040249225527
2008051	20	0.00544111426518458	0.0208685938997061
2008051	21	0.00419584577823737	0.0158795622150388
2008051	22	0.00454179499872885	0.0162037234452193
2008051	23	0.00534895290394408	0.0188982912817579
2008052	0	0.00506203052712707	0.0188911069430399
2008052	1	0.00477143361890392	0.0183893621079373
2008052	2	0.00485566154285721	0.0190796977541715
2008052	3	0.00486018500253955	0.0190969694939434
2008052	4	0.00477554820906931	0.0175639927062388
2008052	5	0.00408454314675971	0.013791947625465
2008052	6	0.00336109411781635	0.0106311361781206
2008052	7	0.00323382243736509	0.0101205138789166
2008052	8	0.00615638138987361	0.0221763887231284
2008052	9	0.0105691929571582	0.0315235650386156
2008052	10	0.0109288077374725	0.0275646305334348
2008052	11	0.0118463793978913	0.0257245491150058
2008052	12	0.0124697689099829	0.0275027391240703
2008052	13	0.0161633139148998	0.035679398519576
2008052	14	0.0170789873453395	0.0386197116389583
2008052	15	0.016027439596157	0.037023357837154
2008052	16	0.0145397315496375	0.0339345939380935
2008052	17	0.0133468897260815	0.033771567174326
2008052	18	0.0128469836713547	0.0383773838306902
2008052	19	0.0253510811545777	0.0791670359235357
2008052	20	0.0288442870288184	0.091994529811789
2008052	21	0.0266979551953059	0.0865111227633766
2008052	22	0.0240742169334836	0.0785602694618179
2008052	23	0.0236965237494641	0.0834470138009612
2008053	0	0.0341081294805936	0.115747396012615
2008053	1	0.0425820355354367	0.138013375817446
2008053	2	0.045138893153571	0.142248924278515
2008053	3	0.0546113328265151	0.150238810656651
2008053	4	0.0795372125827353	0.212843978965402
2008053	5	0.112574630317631	0.285939098193112
2008053	6	0.134730076044096	0.348532070144818
2008053	7	0.150908440167384	0.398565462998733
2008053	8	0.17012761679344	0.441083651858052
2008053	9	0.187314020072172	0.478939035119639
2008053	10	0.199221759700132	0.492023415844134
2008053	11	0.200694165635923	0.477391487754901
2008053	12	0.202581612194893	0.448984744603828
2008053	13	0.208176614369492	0.444874268641526
2008053	14	0.203217333456007	0.429252875119276
2008053	15	0.178007549126555	0.402314111107316
2008053	16	0.171613699766008	0.400912182733573
2008053	17	0.182379279052041	0.464395333431521
2008053	18	0.188440210844792	0.486338370414938
2008053	19	0.166845297802551	0.410568749933213
2008053	20	0.182803398733913	0.391346374329193
2008053	21	0.163941634753919	0.313880321036476
2008053	22	0.0845956349529115	0.18239282848057
2008053	23	0.0279374331794503	0.0715614421067178
2008054	0	0.00886686118793528	0.027397014688412
2008054	1	0.00139855257540402	0.00427492024663451
2008054	2	0.0245974359856452	0.100664064776899
2008054	3	0.134398196003985	0.552461176357147
2008054	4	0.162206307720825	0.664232959602976
2008054	5	0.167399449009008	0.649584044461076
2008054	6	0.157244062900313	0.547417305314796
2008054	7	0.15983091172193	0.50132210040841
2008054	8	0.175643712818134	0.504749750337106
2008054	9	0.216166864922251	0.697513270306642
2008054	10	0.29491393531423	0.985406823315019
2008054	11	0.308326456404521	1.00845439989094
2008054	12	0.295403799188941	0.930013007685331
2008054	13	0.307173313085153	0.807784643454576
2008054	14	0.29261666726776	0.596037632979791
2008054	15	0.251228431712881	0.483245349941094
2008054	16	0.239856084722757	0.47262463382212
2008054	17	0.224789460921818	0.47522053415089
2008054	18	0.20264834087639	0.47004344058562
2008054	19	0.187947108333173	0.444240722733497
2008054	20	0.166325851935495	0.384711813817092
2008054	21	0.119414602915218	0.267554032613796
2008054	22	0.0719635487768404	0.178507111270835
2008054	23	0.0481313255621295	0.134592667936864
2008055	0	0.0435454738401519	0.12313100149655
2008055	1	0.045451850724068	0.156848896812301
2008055	2	0.0663865448849453	0.294268201838198
2008055	3	0.0809492316724363	0.37352140946313
2008055	4	0.0858476888753027	0.404056546508092
2008055	5	0.0861810079807974	0.429606631991811
2008055	6	0.0778377589544095	0.47108628699455
2008055	7	0.107714154311413	0.639145387870268
2008055	8	0.139368203138053	0.696195717845962
2008055	9	0.171766886868885	0.635862813780742
2008055	10	0.178266990512676	0.539070272502985
2008055	11	0.168680699105593	0.436298300062723
2008055	12	0.156891868333549	0.366464842860973
2008055	13	0.150463911770096	0.321329773037538
2008055	14	0.139243085899259	0.307439096900655
2008055	15	0.144003268688713	0.333027858447827
2008055	16	0.146164915347689	0.394509977169726
2008055	17	0.137126748425092	0.417212474506896
2008055	18	0.120765226752748	0.409069771896049
2008055	19	0.095890486403749	0.366958731181235
2008055	20	0.0643688289873132	0.302660882255823
2008055	21	0.0608855733096609	0.223289089753114
2008055	22	0.0242458496692923	0.0639165500239922
2008055	23	0.014819873352477	0.036270661691805
2008056	0	0.0138415935424872	0.0366975277011041
2008056	1	0.0122863410793854	0.0331523535705384
2008056	2	0.0105401880875234	0.0279981904803427
2008056	3	0.00972156917387761	0.0253260619910475
2008056	4	0.00760317275513982	0.0211480044551379
2008056	5	0.00644922379678568	0.019750285145719
2008056	6	0.00606855488773607	0.0206765429088823
2008056	7	0.00699113226849131	0.0236776125109783
2008056	8	0.00908077605402261	0.0302574044046057
2008056	9	0.00739354064068393	0.0277591074314153
2008056	10	0.00427977576185635	0.013000304256275
2008056	11	0.00453438011057162	0.012507133711036
2008056	12	0.00727732012887996	0.0223586732061839
2008056	13	0.0179558423930661	0.0517759910309349
2008056	14	0.0292076115493731	0.0836269783879126
2008056	15	0.0332647455542829	0.0981115228187194
2008056	16	0.029217180977983	0.0963541592032435
2008056	17	0.0218713399014392	0.0832040557809126
2008056	18	0.0154137953272106	0.0613333264431567
2008056	19	0.00804590114030745	0.03496437376444
2008056	20	0.00461756577407356	0.0222793666044862
2008056	21	0.0037336220906197	0.019909658248788
2008056	22	0.00387717530835862	0.0208414721187242
2008056	23	0.0056872890519152	0.0295935752867135
2008057	0	0.011017225072368	0.069162336393505
2008057	1	0.0259460638700643	0.164429434241778
2008057	2	0.025503348170848	0.147975262360247
2008057	3	0.0317274584610593	0.173463374030728
2008057	4	0.0317023140978556	0.165640713048846
2008057	5	0.0243566920468191	0.121576653278892
2008057	6	0.022704392612094	0.102147378149409
2008057	7	0.0234212563767709	0.0907678785462468
2008057	8	0.0240050592622419	0.0726413229151251
2008057	9	0.0170735725732334	0.0438578800911822
2008057	10	0.0125976286065919	0.0299426891915367
2008057	11	0.0121588539088104	0.0259395009943012
2008057	12	0.0109123091076629	0.0235910614501187
2008057	13	0.0113884739031729	0.0255333260294227
2008057	14	0.0078819265880793	0.0210744000891448
2008057	15	0.00304763969046232	0.00943134662804287
2008057	16	0.00325633136379362	0.010266592319614
2008057	17	0.00361302764963459	0.0113427157420471
2008057	18	0.00321231126231399	0.00847403734892881
2008057	19	0.00254582144808967	0.00619048648586429
2008057	20	0.00120276162458049	0.00278178972532575
2008057	21	0.00072548691207653	0.00152913702887282
2008057	22	0.015972379250574	0.0408079246288345
2008057	23	0.0242649325322363	0.062405431636382
2008058	0	0.0316027436758454	0.0812514615709957
2008058	1	0.0396769678445341	0.0922329341550854
2008058	2	0.0370703363902684	0.081593874431258
2008058	3	0.0345526507093462	0.0821352274892986
2008058	4	0.0440946277821898	0.121779463689252
2008058	5	0.0535358589376257	0.150835665883965
2008058	6	0.0623380864624244	0.177719006013683
2008058	7	0.0613095258540223	0.191756273973993
2008058	8	0.0582832376128911	0.189484718964797
2008058	9	0.0599246610735142	0.19751192473885
2008058	10	0.067437239633648	0.236816136101849
2008058	11	0.0857386898475179	0.314821384868976
2008058	12	0.102197809160885	0.401974249078276
2008058	13	0.110336531028772	0.434929622711109
2008058	14	0.0869219195852234	0.320945507871813
2008058	15	0.111153699896868	0.385511485200231
2008058	16	0.0828611886776076	0.25900688910023
2008058	17	0.0757558846549641	0.218580767891844
2008058	18	0.0698420441091044	0.188036254187199
2008058	19	0.0574297206000154	0.148490046387102
2008058	20	0.0396455505048902	0.106516762667789
2008058	21	0.0436213306369711	0.119494945895309
2008058	22	0.0449410605305988	0.12957529166346
2008058	23	0.0372489829697615	0.131091267783046
2008059	0	0.0660487390075895	0.286770864741562
2008059	1	0.102909734418388	0.435744206562439
2008059	2	0.143392141204499	0.581528700837584
2008059	3	0.177125638165293	0.689230426232485
2008059	4	0.223095611382478	0.752909925226447
2008059	5	0.281932506953407	0.741825435525743
2008059	6	0.269885269249771	0.65050093548522
2008059	7	0.25763172418817	0.644703372218453
2008059	8	0.280838829245044	0.73032315963201
2008059	9	0.29463773723072	0.798736533267451
2008059	10	0.271185662928084	0.886915469173536
2008059	11	0.404580420519866	1.24416970337054
2008059	12	0.426184332361949	1.13372960465089
2008059	13	0.418156104527481	0.988296336728608
2008059	14	0.39699116678583	0.906447482987629
2008059	15	0.361593411427384	0.867206883639724
2008059	16	0.33383406123764	0.841195617199097
2008059	17	0.3094193043152	0.817260814501169
2008059	18	0.281096869774075	0.789601526558732
2008059	19	0.254813988577582	0.797221933056651
2008059	20	0.248157271857084	0.849183642030285
2008059	21	0.245869718903266	0.855506984900277
2008059	22	0.228100105730579	0.803502985120158
2008059	23	0.191995485971296	0.709890667993372
2008060	0	0.157754258988258	0.599854757668841
2008060	1	0.133067254333938	0.527022609816719
2008060	2	0.126424864796191	0.500244959870379
2008060	3	0.134408496989579	0.500648220045653
2008060	4	0.133614189152091	0.514865147296682
2008060	5	0.136768023277909	0.504902834665269
2008060	6	0.134725367154631	0.489086231924693
2008060	7	0.130425867122271	0.469818955583256
2008060	8	0.141286219385911	0.455019705498303
2008060	9	0.148911380224953	0.453536179127214
2008060	10	0.187109782219457	0.533717751556682
2008060	11	0.199941775459069	0.533123235612192
2008060	12	0.183704127208076	0.463909118497722
2008060	13	0.168837949064931	0.414755913258445
2008060	14	0.154008268500304	0.379460647702395
2008060	15	0.142397545678002	0.363736550564568
2008060	16	0.132784874367567	0.358882645586368
2008060	17	0.128579264966023	0.33634558969227
2008060	18	0.11163136365743	0.271521544036383
2008060	19	0.112778671963322	0.247824092713354
2008060	20	0.0827097960458889	0.168415847462646
2008060	21	0.0634219061117096	0.124357894329187
2008060	22	0.0266714951337576	0.0584898054501625
2008060	23	0.0266207056546589	0.065004198112609
