# Supplementary material for: A comparison of sea salt emission parameterizations in northwestern Europe using a chemistry transport model setup
Source: Copernicus journal article supplement (doi:10.5194/acp-16-9905-2016), 2016-08-08
Supplement: Supplementary file 2 [file acp-16-9905-2016-supplement.zip › conc/conc.timeseries.values.win2008.ov14.Na.moreStations.csv]

doy	hour	DE0001R	DE0002R	DE0003R	DE0007R	DE0009R	DE0044R	DK0003R	DK0005R	DK0008R	DK0031R	FI0009R	FI0017R	NO0001R	NO0056R	PL0002R	PL0003R	PL0004R	SE0014R	NL0011R
2008001	0	1.86284522208847	0.670793383889195	0.545901436148574	0.894842553692023	0.749450699872683	0.61126952096308	0.974269416676889	1.28627969857449	0.921048105657623	1.3307341344625	0.52583663824648	0.25828760453999	0.608662784725974	0.512034495781003	0.465690937851368	0.456570915146418	0.335730624087911	0.467710088869024	0.939406203995814
2008001	1	1.41275808792339	0.79446764613518	0.524964586815074	0.819539320866125	0.770682332450054	0.655788768902476	1.18219415725579	1.15864766055588	0.481417572116629	1.14869574461665	0.422916252051989	0.268774052869832	0.561602597936675	0.447065517580785	0.532785933620084	0.439630771318101	0.341778139005675	0.411742949889582	0.948167997927542
2008001	2	1.06556307916719	0.779220762276643	0.482366887183992	0.726602730200211	0.593665774312548	0.593983756715115	1.22424862627466	1.34633415623484	0.414433590644182	1.12460990372191	0.315299896259359	0.2922753756026	0.499942394428264	0.391632346649397	0.577070414671672	0.396999546034058	0.342842768268332	0.669009420714026	0.95637402726799
2008001	3	1.13759986947098	0.75087291351286	0.447128555278987	0.626866379030644	0.337291422591621	0.544424861361032	0.984818373984106	1.89154619369562	0.477527288095351	1.06141171222421	0.255822915084925	0.346717094287898	0.378908695523254	0.369974498157091	0.573207620225474	0.330727915408933	0.357079356916277	0.747495386172538	1.00027355330732
2008001	4	1.36945558135109	0.724526569476009	0.421624594053198	0.53936545020395	0.233838744326344	0.540877561645635	0.685693606056577	2.22790094666698	0.431467377068778	0.974460430478498	0.245882000330583	0.404109971590744	0.32181717230586	0.349099913887701	0.577258696192113	0.312391143887584	0.335819790122031	0.604779361608012	1.00793364471664
2008001	5	1.37095583299886	0.712322338884324	0.399830544952953	0.496691546149344	0.216617839457733	0.510328825484661	0.451582635730473	1.86840569217755	0.338692781702715	0.835541163015461	0.298825598392278	0.470758596735426	0.328833398469522	0.325311271429847	0.5863468986416	0.300441192065015	0.25959962528743	0.429621896318035	1.02302970755305
2008001	6	1.39440532250763	0.758906162840672	0.389834113331361	0.452551404730531	0.2085965174578	0.501152922534809	0.399649598361066	0.901183982950437	0.28966702370061	0.663169109723356	0.482154004089659	0.468784966454305	0.344719336960728	0.296753100850526	0.590669731314455	0.294065122350489	0.191194401534973	0.353683829652804	1.04533820699725
2008001	7	1.63801914893165	0.801385654195282	0.444591884446587	0.452055396088242	0.200298877915949	0.500303852336515	0.446732669286016	0.469752900054517	0.262774267373901	0.487121151751605	0.590009971115903	0.45329477810166	0.363394610235438	0.264951332859633	0.692939936253255	0.289834053793473	0.175041602407998	0.306464990289009	1.0536653203999
2008001	8	1.84639884811704	0.81750989701606	0.527190995308265	0.387366587395075	0.190156325005196	0.491197341765393	0.457559829364774	0.398955612145544	0.221463295158824	0.412579471740787	0.637346457099978	0.430444030194353	0.316544933897395	0.226110444916307	0.751097096835281	0.291044749940362	0.183296488317617	0.255074222597738	1.04783867969716
2008001	9	2.08726846019148	0.788055610636727	0.607222858061181	0.314144251197023	0.17865339746899	0.545950044167393	0.439990089513537	0.361522363541388	0.182166395216797	0.466025554793348	0.685228963531224	0.46127771194681	0.266052676801303	0.179246317236381	0.678711470211235	0.344696648967439	0.189359618703996	0.200269059854068	1.01459697110208
2008001	10	2.22150104262638	0.788862491010867	0.510703892000429	0.250902440054294	0.16886192746709	0.658788853773759	0.397990954324458	0.290523365791701	0.155015818994867	0.480538031325728	0.771468397920705	0.473652522947281	0.233399405914515	0.148729336878117	0.59091231663729	0.337822376645617	0.196948006292884	0.15653472830905	0.994958534682611
2008001	11	1.70142899098407	0.968256429915326	0.474075198288984	0.210430247619673	0.161103243016675	0.604002064080688	0.333700273485741	0.227449913454152	0.141779271995734	0.456203562070155	0.780923683197153	0.495232533110055	0.206076239327827	0.137086670564018	0.493834411451079	0.330931365328473	0.230043601828209	0.141939450400125	0.988695472707811
2008001	12	1.21201427002745	1.12731246318197	0.383156643843446	0.192290868394192	0.154881580235601	0.568147406793119	0.2602850014618	0.198718636096891	0.13525273088613	0.391017351481323	0.628439027261183	0.519688603106387	0.19623762862088	0.131624864785879	0.353057549782643	0.360323197971162	0.250052878871225	0.135911974598363	0.958919821003784
2008001	13	0.937185526843533	1.05716873020876	0.252003855728999	0.185596830381491	0.145774984512265	0.624770558397559	0.215703904305179	0.181062710492963	0.158178617665281	0.301087867245325	0.48576753681037	0.563181485447896	0.164205829724722	0.120977819006249	0.264604238026048	0.366394838772942	0.260142975471378	0.137831936253439	0.913513800528987
2008001	14	0.746266970674765	1.01371636282124	0.202082556117117	0.183084110540109	0.129561063598372	0.819864603852965	0.184009931004274	0.171919703483744	0.180450081033377	0.229841727152109	0.385035958732438	0.550599421035428	0.133700748184254	0.11569909685341	0.174339069083411	0.353008970036606	0.248011213325518	0.141456528856948	0.86957333824491
2008001	15	0.579233653901823	0.973989909206743	0.165313820750775	0.180092695466501	0.129287051860463	0.814666205948094	0.157487254425451	0.164425903780385	0.205059696412975	0.19181552712117	0.325195181180838	0.507334885097169	0.113438918564908	0.119150613482313	0.130686050896158	0.338619192612374	0.240159389105216	0.144914762297251	0.825774339473482
2008001	16	0.457422526002822	0.948464933332094	0.156848150504315	0.176414625827565	0.201307807651723	0.671705688486954	0.139506908667012	0.160016144279319	0.245837084787252	0.172077743820546	0.278374594515427	0.512226660971765	0.107360023362049	0.123397019522424	0.1301107248694	0.346751998572137	0.242641188322203	0.158658341855894	0.878548823581518
2008001	17	0.395478991401645	0.870355896213682	0.15284796071172	0.172380188038964	0.303161734823305	0.578746672353685	0.12985356364831	0.154609389599392	0.278943404030912	0.157450292219471	0.262730225933005	0.496941639209437	0.118038107473907	0.126939028017488	0.138030638242602	0.365547798553863	0.243834823726802	0.164160878547646	0.885880557339321
2008001	18	0.35437741532186	0.816327807293609	0.141612367112423	0.168368231114661	0.391564326581578	0.536637217696335	0.126864037846949	0.143756075740558	0.310196708668643	0.144334094731349	0.279823996104317	0.459550647120466	0.121972255971467	0.132185791127845	0.129585328276774	0.384162147944213	0.21378075520201	0.149882000032055	0.831622632087106
2008001	19	0.316315644263891	0.758763223506647	0.136130921094529	0.16430070300763	0.398634882873279	0.469614634729785	0.125536804258169	0.143817078611911	0.307364134216839	0.135085498292457	0.316124620482244	0.413000064060332	0.127149264011379	0.138537435164847	0.0892740073676072	0.40008280958547	0.21177096465003	0.125922674270222	0.734112354819437
2008001	20	0.28370963733663	0.674511403436701	0.135167020685589	0.1600003287846	0.397763462927739	0.447599256103342	0.121243496689079	0.212312270209796	0.292362015592083	0.128056773216961	0.359826027621301	0.370746073838506	0.129301883058151	0.141836811707329	0.0463226223503353	0.390856424573971	0.224164679578605	0.116336519490267	0.63321570891354
2008001	21	0.252500368775108	0.561126407181734	0.136015919132354	0.157023264084794	0.405482691366589	0.418146008528693	0.124235906991713	0.325838627825683	0.334573890533361	0.121896238029793	0.389817634802236	0.332068109101255	0.128211146636853	0.142170018758996	0.0391813024907684	0.3809986948405	0.230726732828126	0.171180606074818	0.522818989072902
2008001	22	0.224251730599849	0.461144657846293	0.138714133355728	0.154267865380803	0.350126792835853	0.384247057704377	0.16259688271744	0.346149852027708	0.399005872960972	0.121582279910977	0.407485609281839	0.280817746623442	0.125870705988757	0.138722002481587	0.0421069296471904	0.368990363171562	0.244243135631358	0.226767907165772	0.492382056985255
2008001	23	0.202716402324877	0.396564875036326	0.144024975962788	0.149268602396556	0.266517144937792	0.34280303957125	0.216902975146025	0.304700563046882	0.434824781661845	0.125651925921187	0.396808271204115	0.229836127517565	0.121668649962921	0.136911703924738	0.0397802262295435	0.358177597936392	0.26526109557457	0.327460177166389	0.655172679208856
2008002	0	0.192996991533588	0.358441203977609	0.153813266080886	0.144074110983859	0.266278904016664	0.313316981036026	0.271294890852327	0.232853688274354	0.294906934421903	0.134421701546091	0.375001199087513	0.189389558787629	0.113324615485443	0.135772301081729	0.0340988923850038	0.35027823994773	0.351327347781526	0.217760855667305	0.753061345019311
2008002	1	0.178230220198383	0.33098276196061	0.169542551283603	0.147194657401351	0.269732536059137	0.286014880491343	0.326735032260763	0.168186085622627	0.180749771254001	0.161192315886403	0.367439934586134	0.171569398229867	0.0972342704449964	0.131766229739369	0.0211180665250529	0.341179162976595	0.51403564171575	0.203241981070971	0.778151411091866
2008002	2	0.172444421039736	0.313320915645396	0.189934204812127	0.171973435426903	0.271390872397763	0.258363673392126	0.374446064334296	0.101037087310911	0.157122033370387	0.207810199108683	0.351310011403112	0.168149549722671	0.0594798668485955	0.123252385443713	0.0107931500351423	0.32439342575109	0.59193715253887	0.198310977924364	0.74218022542447
2008002	3	0.182387665059531	0.297607903520254	0.212164740741263	0.23236165358654	0.276918241241709	0.231162084004355	0.375690813893384	0.069171215661947	0.121159559665627	0.295815577314944	0.329618545699132	0.149221473461791	0.0486712202253628	0.116698413356344	0.00483597497326596	0.303557278722735	0.545411038389996	0.188080610861877	0.723739626037725
2008002	4	0.210605836623728	0.276526465655774	0.233199676533026	0.312419247810846	0.273844084878524	0.20435805097669	0.375854312086236	0.0709102031334408	0.0678754016304279	0.352217749778844	0.329021370120204	0.143466192275002	0.104616202406417	0.111182306629568	0.00385596672368649	0.282686275825366	0.335051938056865	0.185687852641543	0.746829642053924
2008002	5	0.255012301189365	0.24981477046761	0.250423739017705	0.349806127792234	0.308405701201041	0.184802121289189	0.352307967755	0.171238457785663	0.0901861964917496	0.353373331768616	0.32134394751427	0.131824540844982	0.222341530775808	0.106259115834754	0.00365812696125118	0.272770664221888	0.169483518917129	0.189486446344916	0.707205100830387
2008002	6	0.268400547759561	0.225847644649201	0.265387719578832	0.381437216958311	0.324484060208748	0.182117447482665	0.304079250930712	0.243947606163421	0.113424159224158	0.255600630172674	0.304229188301186	0.110322981403822	0.226937450077611	0.102545145156918	0.00457421393709247	0.263589552418008	0.117261450963181	0.190745931498036	0.679191064884563
2008002	7	0.226487435638221	0.207030272501799	0.278140779866654	0.360244786428143	0.305368665881197	0.18449458286781	0.264887981966057	0.249187518681564	0.11227739197644	0.309574653744181	0.304199917337822	0.0980035872093072	0.123903326245181	0.100545704218942	0.0049801579913591	0.220885026500573	0.101519300452849	0.202768132762613	0.699715677812857
2008002	8	0.1550239183106	0.18146876541667	0.292100950727526	0.283221882239929	0.258489619515134	0.189568490573788	0.235077728378327	0.247929433983154	0.202034336752397	0.353020154377665	0.289790433991764	0.0920941339250443	0.0411504831499141	0.0999470209498483	0.00554439076461766	0.155267002088894	0.10370850675802	0.227576231341889	0.742823683068851
2008002	9	0.10247058238651	0.17204887220962	0.415597005805491	0.246631282397262	0.266695656979043	0.205878369652782	0.198548805607522	0.282437805687586	0.226822840603596	0.306935403000943	0.285755857528934	0.0888869960558931	0.0528701405665414	0.0993997931353935	0.00625511686882096	0.13111420116238	0.135397206377494	0.228766210142512	0.764433334706702
2008002	10	0.0601169883948843	0.167161165545646	0.570691378368926	0.258292155550971	0.298605953039976	0.229217236806973	0.165877683878827	0.314178883972064	0.32894034966417	0.250089491290368	0.283745673014157	0.0895003065498593	0.130986996046084	0.0944177697311227	0.00624446185451785	0.150711251875019	0.147435737215186	0.273272956728985	0.819661442572543
2008002	11	0.0889847696878685	0.167760185011887	0.602210112981505	0.256579167736947	0.417900605218208	0.247227480248435	0.152098579126178	0.344168843916233	0.367403857584867	0.208345805217792	0.282743993136835	0.0930464798194114	0.175334131415419	0.0693874630167075	0.00957815801499698	0.137164824599708	0.132640503829691	0.261364673817269	0.846718745489285
2008002	12	0.193310072540524	0.208144087533004	0.565450834087721	0.189226201310834	0.464782242118912	0.265662680979091	0.16806784908266	0.280404443055885	0.282697842229756	0.160464981902414	0.283620591900558	0.0928790282306236	0.17445302354232	0.0569118777778853	0.00660016341760115	0.0692186380483834	0.105975845334837	0.183303008486785	0.866241628057797
2008002	13	0.19856003595584	0.237281599067405	0.521715078523225	0.141042886985408	0.387548396478374	0.256016247152541	0.198169726500663	0.25454739107085	0.256509669305632	0.132602204892891	0.277268971601931	0.0919289222032259	0.187990047330844	0.0597763794958429	0.00410905644154773	0.0469248223102469	0.0775221324091229	0.161462810480312	0.81900783292439
2008002	14	0.250811211346026	0.236804147201524	0.477194276755273	0.097613315394898	0.248777684499869	0.226046513470627	0.264539733790963	0.278688562307676	0.200073281615108	0.140293658248636	0.257673147939678	0.0973086063576036	0.207333047449479	0.0956203644856841	0.00229278758301922	0.0324762776105095	0.0562039904675501	0.207633240764582	0.758754414447211
2008002	15	0.316169748827236	0.229276335582006	0.436452868906671	0.0370651670393077	0.14297649009292	0.132832077907644	0.372003075341552	0.359446035573622	0.227912559258146	0.137059408843381	0.266010390468081	0.0953184604686108	0.231775271466381	0.147315391029638	0.000995874313808409	0.02229340508478	0.0427771540024914	0.181047510197205	0.666359347384858
2008002	16	0.363745479725479	0.229771333980034	0.403704167710869	0.0287976554384884	0.128988744347597	0.0371197850943256	0.355113464444214	0.465122954751664	0.160941284620927	0.153492224286304	0.288734530378075	0.0917925916155947	0.260405052947102	0.155927967165655	0.000381367446869084	0.0164242263022221	0.033403520615253	0.106988670607007	0.561419755947357
2008002	17	0.284593549098357	0.208456033624763	0.35574589935844	0.0265648178802207	0.18986301929942	0.0224950975415882	0.319041267125821	0.301579396934448	0.16728082362612	0.23311879327214	0.295483234134018	0.0957038888884473	0.278447872795544	0.150558162483372	0.000118163931774556	0.0136039555195574	0.02630769443495	0.081615693807769	0.498050477161465
2008002	18	0.239450943542299	0.126822192665358	0.325440760450163	0.0236452227234181	0.262023914410394	0.0277816616364185	0.259359563988794	0.183308935887109	0.175225629712354	0.261439979050569	0.305201384829472	0.0953111629776914	0.247893214298472	0.14753859905049	1.84818312799423e-05	0.0113154879429783	0.0263892564015677	0.076806662375372	0.433189297256159
2008002	19	0.269263444539079	0.0860748863677981	0.326243769427582	0.0234230131124199	0.271036479910377	0.0326822956560229	0.22988327062023	0.188969810772399	0.173057111386339	0.224328624142905	0.357422451758265	0.0662249586206212	0.281091976977549	0.146026872770157	2.52605859107815e-06	0.00929810081851862	0.0314839667434357	0.0740889231511373	0.36648997887278
2008002	20	0.31736666460819	0.031924024730331	0.308090725145365	0.029505148446116	0.231734343150187	0.0247276713738275	0.234451096355326	0.254751849020308	0.150667386743632	0.193056421990402	0.417561863422098	0.0479080608994225	0.263345387859198	0.141409349676823	7.32053877857962e-07	0.00807502660039426	0.0344771648835585	0.0642116130813724	0.289360131335431
2008002	21	0.205329199171633	0.016259349758333	0.301447164091697	0.0334019881416138	0.194776044974053	0.0177663644001628	0.25164641251666	0.304006701810896	0.133634196377209	0.169196697386215	0.440456575030334	0.0485774467684036	0.232659540469215	0.131720881128203	2.69097614179673e-07	0.00784643439247434	0.0370662224342407	0.0528750501311554	0.251815435099011
2008002	22	0.159899156935425	0.0133325004546346	0.310810018153751	0.0207607265170404	0.187453697246507	0.0146533000717654	0.261434291552426	0.285046621608363	0.128535196057383	0.183006582564604	0.448395941636359	0.0507959218208754	0.226733049297886	0.114789012046077	8.869789099113e-08	0.00743956628263745	0.041403909459953	0.0425813271329987	0.24887644922065
2008002	23	0.153461973019909	0.010167307144566	0.320987581565352	0.00648516671018028	0.18956684053268	0.01356578704093	0.252466641076032	0.221069961822738	0.135362453971883	0.203940862423805	0.44831879659969	0.0444016024809238	0.219598967548506	0.103032988805573	3.61153399369888e-08	0.00698573654360629	0.0451303338103589	0.0443086333005738	0.233615827378324
2008003	0	0.166397074954823	0.00709995278056725	0.311277099085877	0.00603414981051258	0.191859777913982	0.0133682068369162	0.244055496843406	0.181851900583313	0.14205679565808	0.20700357695437	0.431154575215984	0.0303635294579396	0.195416373212324	0.0999808394690037	1.93181550366451e-08	0.00648202698439057	0.0454048553630382	0.0682945985176036	0.187932845885333
2008003	1	0.178025107307318	0.00595885786571832	0.29721365763127	0.00810012876520641	0.192669668230383	0.0131684164469082	0.265676822308493	0.160846181264389	0.14647886762819	0.19764869889051	0.425883846450599	0.0265474266096191	0.168427009494128	0.0998170319382057	3.06610666017629e-08	0.00587131955905922	0.0434127286898115	0.0669229813700016	0.158432587023234
2008003	2	0.170133401821262	0.00638362330737914	0.28714634208846	0.00482593613577551	0.178466644431671	0.00966040848755471	0.260795219818146	0.155032688136221	0.164769593836405	0.197355815504381	0.426381470323378	0.0286497037856738	0.16624929321976	0.0939458415791087	1.81449790320635e-06	0.00499998195233612	0.0404840078108981	0.0615558952503181	0.176411282679125
2008003	3	0.139258432762869	0.007283545118214	0.281505275796423	0.00264308831348322	0.158653946874125	0.0073101099928655	0.265139822306616	0.173509655135535	0.188535905187965	0.204735336543132	0.420913739778153	0.0325628102689795	0.178163511901579	0.090548217834099	4.12786742126531e-06	0.00389263218111517	0.038202008736246	0.0576010060299965	0.300982811399498
2008003	4	0.125464417761432	0.00724284308994139	0.277276688265147	0.00157939081589427	0.162316659722576	0.00970649376094224	0.272556666166072	0.153451666129325	0.210114363030169	0.207548075097805	0.414748116249524	0.0395539773917995	0.182482710684711	0.094708496827546	5.55756651277151e-06	0.00311923388364799	0.0365840023280742	0.0500172412174265	0.331777904745208
2008003	5	0.121215375421365	0.00547262934498201	0.277146749313089	0.00097925834818932	0.170936679080357	0.0227263468324297	0.290712165732614	0.14151258040611	0.229882688122284	0.209276349589759	0.417430466615956	0.0476546980599982	0.183947142081553	0.102648272671889	1.45438050977723e-05	0.00289732861273899	0.0328626379741966	0.0481662193338495	0.259315633690686
2008003	6	0.127203317366894	0.00438843051186177	0.256721008202989	0.000562838374550568	0.181871849822762	0.0297857940760953	0.299992349066494	0.145814080287392	0.24794273161748	0.217265840210397	0.428226391445729	0.0573515950123065	0.180887760435469	0.107676980696593	5.01975192407163e-05	0.00368685911338108	0.0311755162776935	0.0560628404533615	0.209127680426717
2008003	7	0.136443749827078	0.00496551710909359	0.232808611157869	0.000325014737896629	0.183110697875044	0.0315212912845589	0.300742891230693	0.15194773183884	0.275103767170066	0.218725794850155	0.437493077128445	0.0574282108560188	0.178457763483076	0.109375875384429	0.000207847967803402	0.0080515990253334	0.0302526577037636	0.0710795468326443	0.197088645469474
2008003	8	0.148401508832456	0.00694964997549416	0.230588633512037	0.000184501712566936	0.18886857410935	0.0436449356627121	0.336155183681406	0.154511995687152	0.314735196011507	0.219654850422151	0.447963838186656	0.0526714145595055	0.181044875241077	0.107690879189906	0.000707171977468238	0.0196792250468022	0.0314600392532595	0.0857417252734247	0.221775105872746
2008003	9	0.147993477912535	0.0204510210063363	0.248833283054679	0.000357374743981939	0.187928802542697	0.0676454355812543	0.343073283257435	0.152084021099938	0.349049245441331	0.24323935586113	0.47761686581664	0.0471636195428948	0.197612742320575	0.101116654130969	0.000265064917939142	0.100702301558556	0.0379177071311944	0.101250649603466	0.257392061547104
2008003	10	0.149714301702321	0.0294940509558245	0.252364556058318	0.00155194149061049	0.179084614827104	0.0851121460644196	0.335687195607769	0.152674953526138	0.377660593150227	0.255510370458054	0.488452266186624	0.0353454642733887	0.224518304422122	0.0830861017147279	4.07293750132495e-05	0.165905569782305	0.0411032056788213	0.119051954619303	0.283097133752476
2008003	11	0.151382866919207	0.027267454366595	0.23295190054775	0.00632937259820888	0.16869853906344	0.0849049331825616	0.322579706225329	0.147034345969881	0.418435873039704	0.240093109094279	0.484331326718979	0.024101348392967	0.245153359065972	0.0635327736063174	5.23727701381152e-05	0.105243386287312	0.0520022519844472	0.129956741645108	0.207693225940459
2008003	12	0.150135407187776	0.0348930740730525	0.209066702448696	0.0133186961239492	0.13637323726031	0.0797754635773612	0.312911669015907	0.133052912445631	0.454102581770214	0.231542782188023	0.491665884417345	0.016211267379432	0.260138469167059	0.05154232780531	0.000112025861182242	0.0788256021459817	0.0562202722524303	0.127620619670357	0.155482513427999
2008003	13	0.150248297921364	0.0386072652541369	0.193992278217325	0.0183702481626042	0.140516733096361	0.0700263952349158	0.310853306888032	0.128685888568407	0.493698642889533	0.228768646570555	0.491156393574015	0.0140381812196674	0.269021720817531	0.0540929806011023	0.000902082932500358	0.064505089171602	0.0622490896681829	0.132906587234667	0.130785478066064
2008003	14	0.177170010695545	0.0278464395975086	0.18473472446514	0.0281299563886987	0.152547940740141	0.0655676056016035	0.308496052900288	0.137931166113468	0.475464932591755	0.235057518341042	0.481563905997184	0.0139386862405127	0.267135060283521	0.0584507197447812	0.00145971003799442	0.061633177179108	0.0567267352487761	0.145946132444911	0.107076525163765
2008003	15	0.193886391235682	0.0210565420404777	0.173422396942355	0.0295238190817577	0.166997224976245	0.0650583028059682	0.317537231210341	0.169911275640817	0.463737040444784	0.239766179699788	0.490592937142128	0.0161998917599645	0.259851702234488	0.0562906955173935	0.000655430218415778	0.0605147462963407	0.0622756419279992	0.15381099621861	0.101197735062254
2008003	16	0.196097055419109	0.0189184683157656	0.160416919368387	0.0550639301220464	0.190828823850389	0.061588655236737	0.324129805836106	0.206373803744968	0.475548178621119	0.250284785690892	0.506983371790221	0.0176105253828834	0.255943424408083	0.050217018027068	4.39338495380736e-05	0.0442252211170218	0.0646023716441545	0.165784187247322	0.104588484221339
2008003	17	0.210024936407197	0.0210349761153436	0.148940774216805	0.0440379675575814	0.229722632868923	0.0568711765145617	0.339348296557473	0.242638015017399	0.49492486640412	0.260648160443408	0.504572242333676	0.0147045225603271	0.252966475511532	0.0461964097840854	5.69974308938721e-06	0.0271498987497357	0.0663916663571284	0.173496766524658	0.113181885942765
2008003	18	0.227956432943621	0.025934066336401	0.13860110000017	0.0300009074812738	0.266871406138388	0.0547004904537834	0.326893308260934	0.264743246511739	0.535677584916814	0.269119543700903	0.505060318234468	0.0104446872883457	0.261304066037108	0.0453453286910278	6.49320843395937e-06	0.0218232100263022	0.068729712988816	0.181329282197682	0.115457469645956
2008003	19	0.239557597092153	0.0301736405295817	0.129344533349715	0.025321412240366	0.28517869578815	0.0546838905150274	0.33063103182584	0.263691096291202	0.595126998892879	0.268814776464961	0.513321033738132	0.0065182547433496	0.278352031334019	0.0467044637397403	5.56843308404294e-06	0.0254775262730818	0.0689738191316845	0.187403892684134	0.11812811002229
2008003	20	0.217777865383981	0.0416930249259666	0.122461975139495	0.0260082055926945	0.315501897079394	0.0547617402306089	0.377400861405302	0.248617294459069	0.667507737914821	0.262803714516279	0.531277370698578	0.00618318536664442	0.305572155660095	0.0513369141323144	7.3416571581807e-06	0.031490215802174	0.0682791479386953	0.202510462381442	0.134533008959237
2008003	21	0.163955017070826	0.0440277319258255	0.118306004343119	0.0242822223530605	0.24918497128843	0.0537565986980299	0.39610325266883	0.225436183245492	0.669496996675329	0.295107110554444	0.54334357206149	0.00653510978177908	0.327272866062229	0.0581717590655388	7.61972889555066e-06	0.05409023886425	0.067673031039605	0.245814414038165	0.178941003020425
2008003	22	0.131051117776824	0.044311450314632	0.11633884638537	0.0215205678842371	0.201440441182687	0.0556339771383833	0.407761192213788	0.214217984832452	0.661959055952408	0.317666466390921	0.545684391600719	0.00518102445327822	0.347831025945389	0.064073887467884	6.73449428257407e-06	0.0628009235125437	0.067397530426982	0.258538586948193	0.198513500430417
2008003	23	0.114896389384464	0.0452697303738105	0.116390508840722	0.0188145486811224	0.178962218653637	0.059268405494491	0.427803708477533	0.184863306779692	0.64031406431489	0.320704578905819	0.541617780868879	0.00395889442234766	0.346535012329117	0.0661373113764266	6.0358513090497e-06	0.0662856997483002	0.0672629271159197	0.263147169763091	0.20119160165301
2008004	0	0.111505119109968	0.0443272202205593	0.117427344988812	0.0165402837063035	0.167837507225142	0.0648544968306264	0.43735224947521	0.166917897491412	0.630929684784409	0.330006121897391	0.54984584275325	0.00350173810349618	0.352567441570635	0.0703388129620888	3.89259232601307e-06	0.0680343873371163	0.0678819256579304	0.262300690576949	0.197007834946861
2008004	1	0.105631432662177	0.0435133080831867	0.11721538203473	0.0150730554039944	0.163649928251711	0.0699691903990576	0.423552578050899	0.156882081648503	0.653669343644527	0.317043045041219	0.572073800543961	0.00329984074125929	0.369330883004428	0.0750135502561323	2.53272805812816e-06	0.0657556988422706	0.0661983515003147	0.262406526129864	0.189819332453588
2008004	2	0.0986372794682218	0.0454433195734329	0.11340140203261	0.0148803150255	0.167485648415767	0.0741271022867692	0.406333152380337	0.154458855868	0.69136277867043	0.284475135628915	0.597147122408979	0.0030974420702286	0.393684652746142	0.0750637780360291	2.50536109670736e-06	0.0558088395673658	0.0622310294168637	0.263576270077952	0.181900289002918
2008004	3	0.0945171953553071	0.0479232202412853	0.106904999568226	0.014698435584934	0.176926694172831	0.078623889890276	0.399080229341734	0.163571047194165	0.730321534634397	0.258581931236682	0.605550216953265	0.00296809346259661	0.404642532563013	0.0732576678773874	1.71486176081725e-06	0.0519061057481435	0.0588132269282278	0.260528238853547	0.178061502816912
2008004	4	0.0935963638285271	0.0518458817461648	0.100664722337968	0.0152732173365605	0.176448543711086	0.081413679135587	0.41171540385103	0.176239518665356	0.719500283325696	0.266461013642046	0.598961566941071	0.00285589268479851	0.4391104575288	0.0717987029356146	6.64681660395015e-07	0.0489225483343496	0.056825516319487	0.263170458446675	0.185786891958182
2008004	5	0.0926239804385863	0.0580673269576551	0.0948508650336665	0.0152035255666441	0.155652699364696	0.0814033902210097	0.446291007615759	0.180889007393357	0.68161367649738	0.279355100148649	0.61373912028345	0.00276654274322905	0.467569457887078	0.070549584990409	9.83719689361107e-07	0.0461226012423615	0.0550729277743537	0.268146147833113	0.195870270398715
2008004	6	0.0941191010110269	0.0627416521621758	0.0890504734781357	0.0151293138272674	0.131635080953261	0.0735591332886561	0.464300383651568	0.177391400644907	0.679450923010497	0.282742571957734	0.629963066480255	0.00270673555561121	0.497992773300648	0.0703989123767169	1.99380001105369e-06	0.043430404759848	0.0555364050836471	0.271270850784868	0.194526238160652
2008004	7	0.0965388257906905	0.0688626679746119	0.0835012358822452	0.0152990050990886	0.115865160081874	0.0796902036341487	0.474585114075991	0.17297233489997	0.679255494599444	0.269368280067146	0.642128040298835	0.00261274828449895	0.533929353650178	0.068620365244557	3.21118579619537e-06	0.0427391664748839	0.0579966584531352	0.269106686104066	0.185710952725838
2008004	8	0.100640514322688	0.0743403954989661	0.0797593373148224	0.0161971193342432	0.103847560910287	0.0726090181707298	0.477921584706906	0.169429922607143	0.708830910352627	0.261438810745623	0.646967223937164	0.00239579301069541	0.573851144842186	0.0651366874164918	2.9022007456966e-05	0.0602733743025246	0.062610185657944	0.266735191035308	0.176270749197621
2008004	9	0.107855945458877	0.0774406723873013	0.0804635814798196	0.0175755857141216	0.107959666391298	0.0804902829259882	0.469555184949007	0.166687957168994	0.739163337637454	0.25070002395198	0.642986229351695	0.00205822366876567	0.609035378970126	0.0619426283316857	3.33179762715721e-05	0.0755442250071334	0.0651646232362773	0.265707156417471	0.169304703585439
2008004	10	0.115841511513401	0.0775229208749414	0.0816010158687074	0.0197771776893326	0.126330910368504	0.07414892168754	0.459999886274786	0.18075914556549	0.750240600495345	0.222310437746034	0.648359648665977	0.00170483516686897	0.623346122367472	0.0614709038386522	9.41479229559764e-06	0.0827709231283168	0.0656300448839995	0.257431189402569	0.162106111023734
2008004	11	0.119366043109891	0.0733290529618015	0.0853348859125617	0.0176512455751109	0.14770561476185	0.069521565643214	0.450490267304536	0.178170569634036	0.73617834625965	0.203303993870094	0.656437797014408	0.00132604005529782	0.61219811024938	0.059911248818883	6.25837032958756e-06	0.0802785248650812	0.0625384460153553	0.253224685781075	0.153758177572291
2008004	12	0.122484357119986	0.064920618217489	0.0798676831981723	0.01413673898632	0.133034844305125	0.0656988745607522	0.437798904089166	0.1734745171333	0.712597830020413	0.185173019715897	0.657425636977292	0.000975185904720467	0.62135298087446	0.0583515000789003	3.98131245173667e-06	0.0774999577349719	0.0599021905184172	0.254732684201318	0.146593521191272
2008004	13	0.122986656975027	0.0506731129507523	0.0726832765987004	0.0107756039741065	0.120429989347224	0.0591048285248486	0.439150396880316	0.169762021102824	0.692762607015269	0.182937527006761	0.646794295812693	0.000751327286060241	0.653878040511197	0.0598702516125458	1.5175063675688e-05	0.0700196022275917	0.058262076834654	0.252958935853794	0.142257973302943
2008004	14	0.124145738116049	0.0432186595952467	0.0653268152867022	0.0113288198984539	0.124905420880503	0.0564510880021031	0.444616007694482	0.179321951728967	0.673037234853301	0.195237069174712	0.645422421982823	0.000636171602999804	0.673576713490006	0.0578708082462045	1.5857106943188e-05	0.0703335703023207	0.0575029049473811	0.248960235648523	0.137279707706319
2008004	15	0.130870290671709	0.0368470153481745	0.0588478846259622	0.0111541948933966	0.134344872055553	0.0513233872305342	0.438398458288174	0.188176615138229	0.660434147296809	0.182866198635173	0.660282074806022	0.000659826874239809	0.690882299719043	0.0586883064078027	5.35217411056111e-06	0.0677215767286891	0.0590978641252022	0.240784828522061	0.134738405454244
2008004	16	0.140009318801266	0.0317460853031702	0.0545745863824712	0.0111528770350996	0.150948365452862	0.042425185825319	0.424231732852177	0.193680002150301	0.655778603673989	0.175877800014222	0.684609036137844	0.000975099573772162	0.69821349153893	0.0597619548843481	6.62967109365521e-06	0.0549821958430567	0.062887604383204	0.241130533125698	0.129249508940783
2008004	17	0.139011735077115	0.0286466463338956	0.0521955145410379	0.0122276842191078	0.161869116561551	0.0351261478397967	0.424589558799849	0.187272883690466	0.647831530589094	0.158574623581848	0.714338455145548	0.00133652105918695	0.68973631378402	0.0622064960002068	9.11840008488818e-06	0.0564291682762517	0.060609269082163	0.253482115365833	0.126249353448332
2008004	18	0.133059176165694	0.0269591822964374	0.0506659260715693	0.0168455541238163	0.117493603741417	0.0332270596099825	0.430901199109733	0.176937554698687	0.657302082486961	0.155260422579158	0.730284121105646	0.00140522780822325	0.685681733741281	0.0664817702004161	5.24346715055507e-06	0.0552193217603633	0.0656476563891243	0.273175044098195	0.13617625975387
2008004	19	0.127198669185529	0.0268418885397112	0.0510800277342131	0.0259205466369394	0.0677730858899826	0.031266255797701	0.41169167130113	0.169827282443505	0.682819607846025	0.150924912242682	0.721943326650131	0.00144344393984266	0.707428005227555	0.074972656874063	1.48727348298871e-05	0.0552721312847107	0.0704776641291056	0.289542644596962	0.100014305575653
2008004	20	0.126437820123979	0.0271691256760213	0.0509804763514649	0.0353059546394662	0.0545701044757289	0.0280750380347302	0.37693048462566	0.166693856796444	0.692602351807707	0.137953552528573	0.715576172724843	0.00169295056637217	0.733843537670942	0.0871702762388806	2.67887660266513e-05	0.0562798952047363	0.0757550820289252	0.311838445793976	0.0662266879338624
2008004	21	0.123085452048737	0.0254854860421637	0.0485233001873666	0.0420751824642116	0.0494360297475217	0.0254613858309014	0.346625704143806	0.168533083588814	0.675401341306299	0.119951756436565	0.725143588121269	0.00192825295829869	0.754637101887379	0.0972603384466808	4.5056482310729e-05	0.0455899093211141	0.0799131268748118	0.328125036239225	0.0544227311715134
2008004	22	0.138890892727848	0.0248387587366474	0.0455218124651939	0.0441178570002302	0.049720773894756	0.0249581799281154	0.296136014722488	0.174717187815849	0.651846664459539	0.111884831318892	0.734147092321346	0.00184418162363048	0.781308599040645	0.102418249091919	6.83319171351822e-05	0.0427385957990287	0.0871116740824218	0.330792375641928	0.0458129692982544
2008004	23	0.149351658302417	0.0313564639225758	0.0436850138352165	0.0390873190981656	0.0547656216166921	0.026921223812561	0.251345962341069	0.176163425858397	0.636590666180903	0.101107277076111	0.782973038813759	0.00167633818402218	0.797210099601861	0.103882533353917	9.57446560399572e-05	0.0428521377563426	0.0913763320217036	0.320678392882468	0.0409615495196843
2008005	0	0.142032814163894	0.0426600757666173	0.0425499438026222	0.0381868084888174	0.0584586809005374	0.029630338120191	0.234580342846127	0.174435621857102	0.633981527279242	0.101801142871791	0.825912288843191	0.0016665618757469	0.807909128247115	0.106043759316126	0.00020452299790465	0.0448381938520511	0.0964327244071539	0.31738542117874	0.0639605105582004
2008005	1	0.158247101626782	0.0560958617381899	0.0408224557312861	0.0414112344797381	0.0683551564878295	0.0335704685863697	0.224424044769665	0.186461220922176	0.641061987860775	0.10312116293809	0.83416270196863	0.00182109573782086	0.809391212816223	0.11000382427325	0.000383888288915645	0.0487905118670238	0.102394461149559	0.314745060263711	0.07757849377673
2008005	2	0.183819716035123	0.0695325552351134	0.0387665504358465	0.0488399280412239	0.0818988892933916	0.0551227007138293	0.227116224683414	0.200770846171285	0.65285068283707	0.107290353570184	0.851208122669172	0.00213569407551097	0.801488223272721	0.114659663053875	0.000600623032952446	0.0517872851853333	0.107084281347187	0.327007417216064	0.0506359902960166
2008005	3	0.210161122592829	0.0778235922849379	0.0365775475752197	0.0492119279549295	0.0923161852531741	0.0791758545668949	0.224463586271065	0.209284680880917	0.660426114626709	0.110608558881844	0.881486226471365	0.00294007558153191	0.795226011545244	0.118764628435457	0.000850705944554582	0.0525817298380001	0.126456194817532	0.354399315277903	0.0331716990109371
2008005	4	0.267359986233918	0.0913495693722614	0.0360997660459682	0.0478796630252378	0.0972664336122341	0.0967861903630458	0.205982818623535	0.208621565562623	0.662406132132111	0.10580289843309	0.911964044384972	0.00450984429910124	0.801628132710744	0.12014684711412	0.00118906044850144	0.051710838243534	0.158947522761703	0.379161010394852	0.0212338154788843
2008005	5	0.335760586256481	0.125548063989505	0.0385102725039191	0.0473079649223672	0.102831207288438	0.101969465081003	0.201255961249353	0.197744439874799	0.648010358499604	0.0968587401148497	0.890985411908741	0.0062709006268101	0.84710345633969	0.117032125092089	0.00173637627336359	0.0538490211803931	0.179036716155348	0.403024643124211	0.00906309259999767
2008005	6	0.371801219347267	0.153444721668257	0.0424161459925805	0.0493322787350939	0.0966011118469406	0.102284296010718	0.204408379553389	0.196804211824083	0.625366460095929	0.0867030371656156	0.917288087100068	0.0093502074944355	0.874638692732648	0.11444673083438	0.00227250632277687	0.0506960698110422	0.19497830085575	0.409273560020872	0.00582851850680861
2008005	7	0.354299683079478	0.15934204413262	0.0458644995999018	0.0559612368562418	0.0893597272839297	0.0990558114461723	0.208375341449193	0.193215880666391	0.638975600198862	0.080208966006159	0.954356379047864	0.0145014528397191	0.886099573070177	0.112691539180544	0.00254325158397487	0.0450053473284762	0.199031674362612	0.406779291226023	0.00728532313766916
2008005	8	0.368834117063714	0.154851351543234	0.0483704872073536	0.0612596935629072	0.0865652454958001	0.0995409388851309	0.211889965193072	0.197556073840112	0.706920600592152	0.0792419011108063	0.978816425888507	0.0185284358250289	0.892671508101523	0.110700243673274	0.00464756859996641	0.0414544077526657	0.191695165238174	0.396157634647285	0.0365394974273007
2008005	9	0.396282945050125	0.142160724397737	0.0605655006828763	0.0607150356394002	0.0808189447091505	0.105777896706869	0.215298885434905	0.216248492143983	0.762942238660592	0.0802782375051789	0.989394878403771	0.0165353532362077	0.92583616710917	0.11253184092835	0.00615147471108283	0.0610233491906583	0.187383776091524	0.393624477150591	0.155459658993592
2008005	10	0.464445767797637	0.129008225416976	0.0980662018513171	0.0611878069663781	0.0773791191652425	0.112407109724907	0.220832710840939	0.219418950102625	0.75589853297578	0.0808650176969919	0.987514388145571	0.0116740238309198	1.01048443905382	0.118898810313427	0.00716865435903598	0.0654014473423729	0.176771701758983	0.407567710775476	0.228379332094623
2008005	11	0.477322677432447	0.106575073535245	0.0999623253179283	0.0628988808090396	0.0800929832144167	0.117174309834828	0.214248355094178	0.217124298559773	0.731160282033006	0.073961938804479	0.992380763107109	0.00935774495035452	1.06287816756832	0.118823741931325	0.00858933525057277	0.0570886917341813	0.16614436749733	0.405665455392605	0.33270101251445
2008005	12	0.440012406552581	0.0994842357192118	0.0792864206115799	0.0689790494085594	0.0844907356160042	0.116948941810709	0.20133560037854	0.199978565584291	0.730299968042416	0.0660985250569836	0.974850190585231	0.00938559493761863	1.09160493076309	0.115178961244657	0.00722039879031711	0.0459230432967114	0.160966815655347	0.382633917411711	0.51274877961099
2008005	13	0.427859578191769	0.084906034161162	0.0521006031918479	0.0693762979536312	0.0869405507443471	0.113929704335057	0.175766236038997	0.178816504683431	0.737741750862435	0.0709968629214588	0.955760463586021	0.0121821770606251	1.11803851202931	0.111593901616276	0.00670579766796473	0.0370606051134752	0.151050903960241	0.36044031736124	0.714595924476047
2008005	14	0.714633548936307	0.07311866278196	0.0319970519635129	0.0695830595492277	0.0889805903574244	0.113316126783327	0.14774926939468	0.145923936048626	0.739025717461021	0.0746571935642149	0.957620336372694	0.0191656886826382	1.08398346108263	0.107098343443247	0.00595744095759446	0.0360920297261753	0.135364296708151	0.364532776830897	0.780516096108907
2008005	15	0.950245729837909	0.0487830544262943	0.0220252378369716	0.0743147529591589	0.0954842083797234	0.113877345612432	0.120506953019428	0.115526745482428	0.772965352200939	0.0708617650345681	0.951239174956555	0.0275247675928903	1.06345572061611	0.100206719759805	0.0049529760457399	0.0289158945109493	0.126816667492222	0.387930365543325	0.503175535873227
2008005	16	0.962469148519262	0.0303235128316721	0.0196555279121358	0.0819263744571522	0.0922416134562827	0.113366009224785	0.0852854862735567	0.100701207068435	0.8023204459943	0.05530638552118	0.957886868135669	0.0335732202629106	0.998084526855665	0.0920417061792265	0.00433476720452097	0.0311379114299791	0.110845589180156	0.422735517611469	0.286789289860641
2008005	17	0.959230656974789	0.0235295321727041	0.0134573545450439	0.089219198325116	0.0926433784591657	0.0885243344507362	0.0519547749377181	0.0970911425941799	0.808324416810491	0.0942673114766054	0.964687011567456	0.0409526111732553	0.878143798724731	0.0847894509236249	0.00503308089685934	0.0419773222950703	0.108825807188986	0.44280465619682	0.218221561716598
2008005	18	1.04479263312022	0.0298760770276963	0.00800164287549547	0.0864686061235919	0.0922799601476948	0.0597903289238599	0.0284814567443842	0.164642611648254	0.809872481544303	0.0749540295808697	0.999559315600792	0.0527277205484325	0.769426803157956	0.0800442309818689	0.00673339047775918	0.0513220431071496	0.107164438704304	0.460000651840722	0.221414417985288
2008005	19	1.14161609646067	0.044432779307571	0.00595768372226357	0.0694859571309998	0.0786068244247016	0.0467205231311456	0.020282895053168	0.318299747139829	0.751175507404004	0.0542146280352075	1.0053671635861	0.0649256958380364	0.693455091374496	0.0761764600102317	0.0105585116823782	0.0539586034725746	0.100856754760657	0.47315664733741	0.289151138746028
2008005	20	1.25521323428476	0.0610965552939647	0.00376893969366122	0.0543856223982456	0.0636915583400494	0.0393022898157953	0.0284258833294014	0.458820093610036	0.650224288363786	0.0876529594795571	1.01375574095507	0.0707770181203195	0.628905049983811	0.0727634517686001	0.0181775886652793	0.0559418343410612	0.0956428880996472	0.474297908133449	0.383895060142377
2008005	21	1.19627897562079	0.0720034006343562	0.00192214362330461	0.0441057146359299	0.0607563568093996	0.0367687077882106	0.0744473057704216	0.572852074851005	0.577348443192542	0.319305637411839	1.02391411207218	0.077551664930711	0.548523501535225	0.0715617890242696	0.0238552648571029	0.0584254796453529	0.104366928400469	0.486940723587894	0.40743551041743
2008005	22	1.1427397836966	0.083099023397093	0.00143863748361186	0.0382175649998034	0.0716640754841656	0.0370312134355793	0.140918555353889	0.656331908698597	0.438299034088295	0.733335797233162	1.0047166098498	0.0840539812198475	0.439426108957935	0.0733284458238226	0.033982520596278	0.0574379787632922	0.101642928640782	0.517115829448053	0.405754320633577
2008005	23	1.37866085373594	0.102448762380382	0.00226539856790529	0.034511674222993	0.108754352741401	0.0372318865992224	0.207650385636377	0.704059463363226	0.358433253014066	0.872386844658783	0.994523600643576	0.0888150860250255	0.372962947137211	0.074433670450899	0.0393740557028201	0.0544748353716061	0.0941971611643056	0.570292962544167	0.384911579038515
2008006	0	1.47679363477322	0.121997147865648	0.0033941085154203	0.0313235634422522	0.133489687091183	0.0368586607113211	0.271391092521804	0.661068609335561	0.451373807359058	0.769712071872372	0.986261739803696	0.0942030646449702	0.330585813751084	0.075178762240281	0.0392060965965366	0.0541175883004817	0.0859247877545603	0.579247839140053	0.403873245978553
2008006	1	1.43923582310314	0.139582765147949	0.00527729681164693	0.0281805943034911	0.179368326487309	0.0396110908527087	0.316264627974929	0.500236835318289	0.682090787114145	0.560638763314185	0.986025520633473	0.101277917088645	0.319761952956299	0.0750921899440327	0.0340285245137331	0.0566052357557832	0.0824154679636941	0.511033083710539	0.437081032241552
2008006	2	1.49988502498189	0.152879466690946	0.00383330950179534	0.0260302856500862	0.188905092702507	0.0461505376984535	0.346975230688811	0.384337559940878	0.693710034276479	0.576549499424776	0.965880421938144	0.119928797439498	0.293597191943937	0.0722109882174925	0.027973200244671	0.0600887759689258	0.0852186551925605	0.576817206986473	0.474755848815167
2008006	3	1.42140731795262	0.157738935359461	0.00184982861765666	0.026485601101482	0.151165889884084	0.0534506616554256	0.385462859419295	0.402255656802567	0.76217486402189	0.865928592031196	0.959227478554374	0.131778270353782	0.245426945030986	0.0660720623847346	0.0235739524599862	0.063438288452076	0.081488471451006	0.716925176163777	0.511013972768259
2008006	4	0.924890982926002	0.154067255420165	0.00151553512184677	0.0291249836565232	0.121602086232357	0.0584547922487064	0.464955363367933	0.451756137666143	0.689251756635986	1.11608425161821	1.02125164438697	0.14153591181027	0.188445184344628	0.0613941567614772	0.0221208473877443	0.0671019833222613	0.0660718857693887	0.833905743591981	0.552625607690324
2008006	5	0.93604216055381	0.146039760875908	0.00159817178282408	0.0313989755456931	0.117426730717058	0.0602622570846747	0.58044852332932	0.507642960181869	0.563324456101841	1.21924582708825	1.04403158398362	0.156436496540329	0.143613631502289	0.0573076458409115	0.0210314707091078	0.062026744467725	0.0569639589998982	0.773843666055926	0.551655735162412
2008006	6	0.956738341929645	0.135285943177512	0.0010231055503191	0.0325346898392376	0.121151105719528	0.0614156508562184	0.688347241655403	0.49657547242662	0.652926034236617	1.08216058473226	1.01080167040576	0.163113777893282	0.106160048214358	0.0541600347319883	0.0207285928298632	0.0587261977195187	0.0537627265312258	0.411543112069825	0.553211123858208
2008006	7	0.863731298923477	0.122000254229062	0.000756155414492988	0.0317502584353886	0.124929143632962	0.0612906803409632	0.740681114410041	0.498450309990906	0.823211374299374	0.936204947992753	0.992686589924212	0.178465007092057	0.0668304338312617	0.0526204879654679	0.0218608837901498	0.0555639049675501	0.0517683361175318	0.292081431980107	0.572045482529238
2008006	8	0.851267833488213	0.109179040432792	0.000716786681932326	0.0292310501087432	0.128004878982236	0.0612224941415564	0.723724280146178	0.478580273351797	1.04800348079037	0.889859412023732	0.976233825454664	0.174389859165534	0.0458413278878575	0.0521582732903072	0.0226913676276392	0.0627361743875155	0.0463665506066036	0.866145176307683	0.696961539480186
2008006	9	0.928798006295197	0.0980738052749957	0.000709471702559486	0.0262036583661048	0.13454559756816	0.0597094671999981	0.658618915194858	0.453018569930421	1.1370219731665	0.951479741815382	0.947323472765905	0.165836548008963	0.0422822840636224	0.0520434655492332	0.024054365354186	0.0639567918135218	0.0437705809658901	1.09118762670644	0.705483582572961
2008006	10	1.0855668027263	0.0885828365783391	0.00073804013815471	0.0234184978136673	0.147994567291512	0.0552206840740649	0.58818547773933	0.426945789356815	1.13525347883498	1.13533776343365	0.904741709751199	0.161859175477995	0.0422456828733769	0.0519020172283563	0.0198645088582828	0.0583149425342223	0.0442822259693782	1.10637977645112	0.683980393718263
2008006	11	1.30905020072997	0.089105520329825	0.000973820651764962	0.0213184538150324	0.163197999591579	0.0475968286742037	0.528692107593498	0.400901409491355	0.990300508604552	1.2832961622294	0.860091832843535	0.164844222667894	0.0415860477474102	0.0512695840848505	0.0148708857559333	0.0562617625377903	0.0426204041171004	1.08724118033709	0.854370389387867
2008006	12	1.52038333765973	0.169535109116335	0.00475584962616302	0.0197750291260303	0.175490451648606	0.038809696348082	0.485781385864356	0.37427936909429	0.779720213762538	1.384097955907	0.850821048092217	0.162261132132535	0.0409677369259668	0.0504610448822151	0.0116296090587581	0.0629985508792463	0.0418307887109567	1.02488084227779	0.820714371518253
2008006	13	1.61819593240258	0.315241300688175	0.00872329368206245	0.0186628885013365	0.190363892679174	0.0338142883986107	0.460759750654893	0.352684718157916	0.641917748409094	1.42180763227576	0.841088630042155	0.158136891292099	0.0412571290219615	0.0497145761374476	0.00966459484167634	0.0608862669668177	0.0412942411560905	0.914770011156601	0.797492625410413
2008006	14	1.60252997177011	0.381293881303287	0.00914456584808154	0.0180498401602034	0.2034831929479	0.0371815006876633	0.448217230757244	0.338918263495232	0.582455679824985	1.37245656285564	0.823855561997571	0.156181768216221	0.0401629040653695	0.0490673533784229	0.00508959947700615	0.0562432409240094	0.0407971168987488	0.833632567551708	0.786217721081283
2008006	15	1.55817067260878	0.382667243075028	0.009863878703442	0.0182596020579774	0.212623704446355	0.0383742092764168	0.448622479917932	0.338435000259836	0.579091649572495	1.2467480876224	0.793049136947543	0.164431318700538	0.0399474151446806	0.0482275148607364	0.00415787468050436	0.0533944919520263	0.0401282114595619	0.820539245509735	0.794845699094459
2008006	16	1.48330247503226	0.364729877650773	0.00928798674198031	0.0199244345717365	0.233618029771674	0.0333231559467333	0.480010369450146	0.344042770112332	0.651482358382682	1.14100403385861	0.745468248465208	0.165811202277244	0.0701077612454055	0.0475538479508154	0.00954171622804321	0.0505717929780507	0.0391187623262513	0.863224160554066	0.70093731199672
2008006	17	1.36825208713922	0.344231342682369	0.00816366828789094	0.0321785418581693	0.246932479722697	0.0265320437353747	0.5438373846571	0.353457661715644	0.781711340213166	1.04980367517092	0.701448752345181	0.166530725265956	0.295680000812281	0.0468994781332319	0.0155360778736186	0.0466491487976656	0.0379391940935196	0.982609079726094	0.624827566204346
2008006	18	1.19250430397603	0.325390339596506	0.00748962090790153	0.0698973765721183	0.267066412937346	0.0294529283361929	0.64350049195209	0.427622186758408	0.915656054701435	0.999684760978104	0.659569950011695	0.165142971209873	0.454395169056482	0.0461577311194659	0.0211577925004013	0.0441653789436394	0.0370159199109499	1.1342932925786	0.560811869905803
2008006	19	0.977080391317551	0.313481337620889	0.00704432581269741	0.155889163091681	0.301834977237532	0.066061427591416	0.768021178139074	0.569892938028646	0.939802303879046	1.02469262508841	0.616254379912981	0.164321107434526	0.428876364069231	0.0444989949459682	0.0241329646400996	0.0422967988694655	0.0368997955013406	1.25128543960175	0.516171476733459
2008006	20	0.861559245835482	0.310730149902469	0.00655459079144598	0.281824808116116	0.329940908921014	0.12563371860077	0.839816152679447	0.701721917195546	1.00715036225937	1.08210699520956	0.597584590088438	0.160710512381907	0.32480311584872	0.0426151022805597	0.0247232157377226	0.0364573035725615	0.0383967643474083	1.28709591654225	0.483074324777567
2008006	21	0.84450797465521	0.329794763261732	0.00748935352748135	0.421961089863547	0.355480531227371	0.153948822210384	0.846504008886043	0.793708991302866	1.1079388771768	1.10689992494946	0.601421709639015	0.158322691655008	0.176177003857331	0.0416649881669657	0.022615579929963	0.0270055439945926	0.0611768509129861	1.22107614515089	0.455860100397376
2008006	22	0.990911556201704	0.378548572987955	0.00840111857471523	0.46995688547462	0.377372374481561	0.158947846165786	0.829124692394421	0.745661450072345	1.13488698049416	1.03752482842573	0.583519763105667	0.160189033886141	0.0949710856879143	0.0497881833559383	0.0179270801296021	0.0350275418544353	0.106197898768856	1.13138137032181	0.429361115901686
2008006	23	1.28282483714334	0.410656377591331	0.00600259897439188	0.453859123065569	0.413631029971917	0.147827952114369	0.80518886474533	0.666759835827945	1.06911817067127	0.920423133814404	0.547828299513662	0.170929609265183	0.0640079611748509	0.104557463214326	0.0148803910620553	0.0684949031821606	0.207737274384334	1.08931161393031	0.404410449701896
2008007	0	1.41341038857509	0.4984085236335	0.00309588822568692	0.367548841536331	0.452393173387928	0.144425614506359	0.769574627312166	0.615555615041273	0.950733563836213	0.828737065764159	0.496439186388975	0.178245836531968	0.0526002105159228	0.229644991981835	0.0142987612040789	0.0848682544560759	0.248755042893722	1.03509672823919	0.38500840566541
2008007	1	1.46429697327004	0.538560123299617	0.00205587940265362	0.297360703303676	0.575513641533618	0.15393857973874	0.729104186066207	0.577515372797281	0.888067852937691	0.72956359430094	0.431777771663469	0.170078448761787	0.0491399275216615	0.384260768987603	0.0172452248809855	0.120178988825559	0.243990843187056	0.973990550944093	0.374745121770958
2008007	2	1.45840875057307	0.530646046089677	0.00200553975922001	0.263936127535128	0.730313578716499	0.176366986103332	0.695056391107217	0.550529004633835	0.834639754189538	0.676776805830615	0.375531675790509	0.167949537659881	0.117943255070252	0.529679934923347	0.0247710950456578	0.160917502989961	0.217433149729112	0.937958928359272	0.468921153146177
2008007	3	1.25801067594064	0.504604167025358	0.00305456552395106	0.260326571946001	0.766513929359183	0.196737078637148	0.674941494417283	0.523927929187188	0.783855898857718	0.689835319703703	0.325882160858081	0.162885683964072	0.309176260124644	0.584880537440804	0.0288370546242259	0.191908236789235	0.188944427399971	0.923366724515734	0.463427015976448
2008007	4	1.02212462206411	0.477053340161809	0.00364183107235834	0.281664825319102	0.675959032619335	0.202891902952973	0.685284090522836	0.51652544672763	0.786444224540934	0.711161501791444	0.284206224369731	0.154918981742033	0.439244628108002	0.574119513238456	0.0286569480915838	0.214168082295148	0.177906972005877	0.851811945395016	0.458619869933667
2008007	5	0.911843573779431	0.453629711284191	0.00125678810399184	0.452235985692838	0.521225443982891	0.218447410545253	0.697566546827705	0.527890994212068	0.835440163846757	0.892612301286058	0.252636344166239	0.147480150068616	0.507164082762499	0.546303371417206	0.0218954130988544	0.228265241800667	0.18402215928885	0.778512887575313	0.184227871850017
2008007	6	0.806498354005785	0.440165047933425	0.0397168143572495	0.508118874826707	0.473654918400617	0.26844668790509	0.704487479275344	0.548819992086398	0.850238435346154	1.04663545693719	0.228928792484396	0.142960063415199	0.510821005192956	0.517136887215626	0.0147053242893679	0.255407294068281	0.210459831032468	0.767290929579594	0.0321202943241392
2008007	7	0.706440323987906	0.429122335384282	0.0760582613306445	0.532957804444812	0.485721261715064	0.36912869769802	0.661321746954283	0.505971040895367	0.752558948071275	0.98607556643567	0.207381764632277	0.140295074586003	0.457972443944477	0.502277309377349	0.0126523493089087	0.294257656457154	0.266012074740911	0.807029068050667	0.0339839465430017
2008007	8	0.602260831631673	0.393882621879065	0.245997950254951	0.49747620176743	0.5449393754586	0.441763833100739	0.535476950597386	0.473734403928186	0.677232191171558	0.795078635207987	0.187763335831445	0.144339783354252	0.432759166368517	0.496329722958684	0.0122031288952784	0.461746537474077	0.303177911661248	0.887024219020052	0.425471983384785
2008007	9	0.518992933136667	0.331974415428589	0.252596034660837	0.373620603532987	0.54106324865942	0.523136611045791	0.477064033434368	0.455803798751417	0.667077118505558	0.508375619311198	0.172628812957523	0.148005716685566	0.567128340571825	0.563368663692056	0.0145901092186063	0.45232040181679	0.286285723997183	0.862752473781212	0.55515959676176
2008007	10	0.470635753168057	0.276314281404859	0.11615360135691	0.281255285560315	0.502102246827384	0.521997649312526	0.499186752541174	0.443257105177543	0.720200804545204	0.383531089526113	0.162125127373996	0.149116611709547	0.212888344185482	0.66526372168154	0.02139679587775	0.408411956138378	0.265169754934744	0.686469343979514	0.769604664514855
2008007	11	0.424697501300413	0.104073474520224	0.0724507381432081	0.315835373178324	0.468161296330545	0.412946876919437	0.498401454486041	0.453274052757771	0.769546653334677	0.365775923311437	0.154962827522199	0.151455829603453	0.13563073774497	0.529911095174143	0.0243693469719504	0.421047220530451	0.266122989741029	0.638590280824255	0.72082021534107
2008007	12	0.393854880083	0.121751956463225	0.167962252612649	0.352782900277073	0.324771761963854	0.105011795704873	0.515869084027047	0.478291871685613	0.797772492176139	0.367114135650961	0.148859089595302	0.156029985978319	0.383415004189466	0.468447204952102	0.0264078190898351	0.495847379197302	0.288590512204426	0.702985743765485	0.613495854127639
2008007	13	0.34194171438002	0.0809611804810696	0.231064949902342	0.332973562079464	0.265203371641948	0.0976149536309674	0.491239368052454	0.37388649566222	0.764546220987468	0.416854642641688	0.146319065069451	0.163033204058058	0.891275163448954	0.442579271318223	0.0310559389845183	0.467965505936473	0.32518974352932	0.756955725861064	0.620730404853008
2008007	14	0.300006710927181	0.125253156362284	0.143955796578902	0.229780369318949	0.283190562835654	0.319665581304919	0.436082734138675	0.285024018432366	0.738767616190335	0.437956502679732	0.145385051489394	0.163762968119215	1.08597560889065	0.471321789068879	0.0469457728391202	0.350163946362247	0.361139397551494	0.750127123009451	0.684306846259538
2008007	15	0.28805671201699	0.0732315665987484	0.0970472295525219	0.138028607849422	0.276367070372909	0.244443382737903	0.418346590572384	0.205777639713879	0.725559231242871	0.420577721537896	0.141603526428934	0.16179183921196	0.919656501614892	0.568751319882664	0.0798068034308091	0.242543939266397	0.350449040933234	0.677012387982886	0.732253120623545
2008007	16	0.308584715407301	0.150674211747038	0.0922435407329804	0.181455972569673	0.225431065032491	0.152585764553317	0.436743019456044	0.136042434643682	0.720975235223772	0.414960162651045	0.133138544853938	0.161174962673252	0.754637672480003	0.517321722451346	0.109375596901301	0.174507057741291	0.351853827578269	0.610916315534727	0.676137305120246
2008007	17	0.338117891176276	0.0425750147659848	0.0939243631333869	0.0969339622435072	0.159095169831757	0.149330685953527	0.480514476237528	0.144878618523169	0.643666572170261	0.414713181462023	0.123211126901742	0.155890748357664	0.650400434341873	0.464114574588793	0.137217300098052	0.148048446661896	0.363354857811476	0.581945227818121	0.575797886014408
2008007	18	0.355366597158537	0.0418993555265068	0.109219033838328	0.0645978203038143	0.108536671984001	0.201349705041599	0.518804493887481	0.144273730318438	0.509013894143014	0.419809126822301	0.112126468651242	0.150078629367678	0.591370871420217	0.440222856997949	0.153411295266164	0.133956523332498	0.382077519087361	0.573681625363096	0.370366931538765
2008007	19	0.489602977395756	0.0635437124571138	0.126143995364098	0.0550850549465078	0.0776486169539036	0.17801582344717	0.525610380055263	0.140779689012917	0.44998047112728	0.427485840089521	0.105509849338465	0.138259082612836	0.541665799369516	0.41877512591124	0.160947928722136	0.10094177199153	0.404487531049388	0.533467864061061	0.248252659442551
2008007	20	0.225929532434902	0.12745570515679	0.139951320943046	0.0354542320171916	0.066318927718454	0.175052375547019	0.499445279730832	0.249227271385547	0.416253945830171	0.429204948152229	0.0932530024092808	0.130680333370602	0.487400896595789	0.439727723626897	0.157917288038174	0.0888975728972976	0.335409180670104	0.477061510395084	0.337222539565443
2008007	21	0.500648573031276	0.216938592521021	0.176973410741108	0.0184603313129173	0.106440276068293	0.21064710615	0.462940181781395	0.354668156668078	0.381086485417356	0.42285198766866	0.082453121932576	0.130213732882763	0.440016616914848	0.503778178538569	0.153389924086733	0.106102760560928	0.209260831355122	0.440637067409208	0.646949442915497
2008007	22	1.34981448328959	0.312957712234945	0.242450580102767	0.0956137688756646	0.232157288762941	0.223599802757435	0.434960668246999	0.432065524698487	0.346828648358896	0.38480456453776	0.0732311213291441	0.13192075900986	0.404785404234388	0.535528296436271	0.179674752397854	0.128818252327924	0.143804246915008	0.409854244887021	0.584823726790855
2008007	23	1.35608966886702	0.300809004740449	0.286972733949751	0.200239633343314	0.41767633286823	0.234803015129576	0.413712135317746	0.384975698970354	0.328059829662295	0.319546427418634	0.0652289842808901	0.13260442605746	0.373060453401468	0.552294776403226	0.278076007254008	0.142640141517737	0.137588990495156	0.375373447923425	0.586367273281665
2008008	0	1.21683528121821	0.176256171924687	0.292035159267485	0.148839090475819	0.490125623829284	0.195843238296571	0.406658627009476	0.481987428923081	0.322139282315437	0.274785411013025	0.0575776378835756	0.129809251158649	0.350336023759186	0.535204077358555	0.161328361187318	0.168071703351853	0.11962233592656	0.348796095777269	0.581499100850143
2008008	1	0.892645207274781	0.0594876169257776	0.302566164213549	0.2964321642572	0.353273798442653	0.14084558360291	0.458645977383422	1.14651033244914	0.320807868412852	0.500414602547695	0.0527114306271042	0.126907803239006	0.338968757708215	0.468429617347832	0.102049405936047	0.193544014164897	0.0879063827877199	0.338179706872446	0.502766571101454
2008008	2	0.868074317235803	0.139025819055238	0.31070529273118	0.208497609480788	0.610727586997389	0.169251101045351	0.353395482240189	1.11296874155861	0.320791793194589	0.938346199947608	0.0673025055892017	0.123111999621746	0.334089834596254	0.406136118547528	0.0630962338288787	0.18687451207033	0.0815685271825254	0.334313027907746	0.425123094153726
2008008	3	0.823748281699074	0.221112886725859	0.324306375838972	0.117268111479019	1.06198206815719	0.193220709172814	0.301776641160388	0.99751431653958	0.320919040737232	1.01026421275279	0.0827659365639352	0.112737886911189	0.328852406886271	0.354226466271455	0.0474546592514832	0.132973990805622	0.177248054621752	0.33132441232396	0.365739996432495
2008008	4	1.20258077060792	0.370783803244746	0.344437214537769	0.0204711407828259	0.932624586433025	0.0916376516829309	0.356566065611448	0.798877158347173	0.341523734135116	0.866958766660177	0.0963487606590118	0.0997303871744772	0.321901604041051	0.31981834917388	0.0390320230603596	0.112324410307619	0.547633158809093	0.328245442074346	0.29121894011061
2008008	5	1.84340943492794	0.405448618983412	0.361117197596829	0.016043094293035	0.777124806904854	0.086118087847161	0.720603245485083	0.705277038215539	0.396677439456168	0.60161198408544	0.125818336834738	0.0875247144199389	0.313924898486196	0.300056880620097	0.0383473180107504	0.135832200018089	0.68892466252554	0.328845177702936	0.317496201396137
2008008	6	1.87981965897912	0.452792176975115	0.381377716670937	0.0706524709016646	0.679476204336867	0.161000283934203	0.795081399727089	0.636986983495976	0.441251516179526	0.436976927733025	0.158310793786699	0.0754579248535613	0.298089760672228	0.295598549388242	0.0293978299280275	0.127652670112038	0.463836626334228	0.347542226860376	0.387762753276568
2008008	7	1.66257511659628	0.473887340687546	0.445827715844296	0.175132773796289	0.600136562421993	0.185396525352673	0.670022354256598	0.890979504058956	0.451606880846189	0.752244028095373	0.188915629096995	0.0644031074351661	0.282293724301408	0.300548775210231	0.0618537736375914	0.088517427111008	0.29060661651321	0.383321844933002	0.535974041670264
2008008	8	1.34742822937688	0.32459227389395	0.370935444531926	0.578381486260071	0.565082635411463	0.160583169190591	0.407822331166257	1.37716260617925	0.598053687071741	1.47867399029598	0.178338882706044	0.0575644002809727	0.267776775392912	0.306019157167244	0.123597820264788	0.0680842010481098	0.243610544830768	0.390460120211575	0.568938326512446
2008008	9	0.850995953445619	0.125880028591829	0.275579650491713	0.579114717108245	0.884841008091086	0.140425260587332	0.532320623112544	1.3807207437472	0.817060374682629	1.45913424878162	0.175329236206004	0.0534995502438423	0.25233447570839	0.314803847157686	0.16608665386183	0.082661967157194	0.336842872916667	0.39427837565213	0.563898922231291
2008008	10	1.18023900463841	0.0989241369799629	0.355097780590776	0.504251190241316	1.20695968309086	0.1332588358009	0.804049819798956	1.2130799198865	0.779095295249229	1.43094113236935	0.223537075957559	0.0502522756435009	0.241496914560721	0.355568154956013	0.15697717420862	0.0959718047153711	0.569868564821271	0.382608187091101	0.666594530616793
2008008	11	1.56854372119576	0.18461002150046	0.551522019210073	0.325139832178978	1.07242856789248	0.0919670019642883	0.923776254140867	0.769203508568579	0.617837777102043	1.17957000934609	0.353572037882408	0.0470217025748415	0.237908868858613	0.417610642271218	0.128002402458677	0.100095379845418	0.807217669752204	0.580524832641019	0.994781761987081
2008008	12	1.59246265690374	0.392498524516123	0.692221853827772	0.105496008055014	0.671989828508326	0.0685895157228144	0.948386384260823	0.30429685836963	0.70453123072266	0.496853174360035	0.463302137204403	0.0439856328245964	0.229443326880638	0.455588830223167	0.0611620235462725	0.122219649012692	0.906706469327322	0.664522007658885	0.912730370654293
2008008	13	1.41982088760835	0.504589771540633	0.703594024064131	0.0665542516289732	0.336474956884704	0.101811573444909	0.847474786772332	0.357169454411558	1.20323877562185	0.424240108445073	0.493483379954883	0.0397055886432046	0.273724526703678	0.450680816426386	0.0597298695399548	0.102936441467943	0.891366988552872	0.631685980247167	1.25500838821033
2008008	14	1.23865206543206	0.358989970195439	0.684762861251816	0.105892762127617	0.257366363157389	0.116377761322296	0.627522511495752	0.396323348327239	1.34006232778862	0.725985345704162	0.482453926726011	0.0327607052231032	0.405629736083378	0.409952185525941	0.0550583607752514	0.0609033422364744	0.629462214563111	0.691453217370603	1.38069812399287
2008008	15	1.28905629699783	0.319167045242498	0.644811025498956	0.204005887404611	0.257761542990548	0.0962740386967217	0.48375116353329	0.516209841876067	1.22543807957233	1.08863849391596	0.46580068048557	0.0255401789105964	0.524535659188633	0.369693850912623	0.0538650585547746	0.0359439212623189	0.572784060484714	1.12502750183241	1.26499800438886
2008008	16	1.38694723922544	0.576219536557189	0.584594477354192	0.258402831617829	0.198472975132687	0.0984382084124699	0.509387125447092	0.599485885431208	0.950505238698745	1.10260527347719	0.45313676064047	0.0212092877035639	0.865720709206173	0.340118538387083	0.0434628512973884	0.0323492644238087	1.1774336400238	1.29692432193311	1.16679073426635
2008008	17	1.60573426084556	0.5512121512782	0.524996282682764	0.149351179612644	0.167556978797991	0.383197294374084	0.683048586267061	0.56562338735064	0.671523034471413	1.00409681494366	0.425707664233721	0.0196327478069845	1.09034065843679	0.328378192636721	0.0293186211956046	0.0317323922321236	1.1237700094231	1.29002674723228	1.10050171521708
2008008	18	1.43380582215775	0.535105076342401	0.498052554551974	0.14446850886115	0.168643208499796	0.475684640611004	0.740320398891362	0.409438175200525	0.625239625535779	0.922431044275832	0.389444946397431	0.0200551814192298	1.31899507507953	0.324659300655692	0.0234569324563748	0.0316536363148861	0.85358435492984	1.09973590428268	1.08994630292991
2008008	19	1.36436212598622	0.642597839358189	0.461191359313691	0.298974417171313	0.170103400178836	0.39779859812511	0.703466678048146	0.376716026247341	0.914460466994765	0.638478564990164	0.362983133911295	0.0217518554997554	1.27485843340537	0.320579411874061	0.0264855808001804	0.0315970663496894	0.563538111855479	0.761256818301202	1.16455492402317
2008008	20	1.75547348268736	0.756809575054411	0.42550433341226	0.284390379467891	0.223853580914718	0.331073031404519	0.469071666668186	0.537166314709475	0.967962293701629	0.120025558819675	0.372586337095239	0.0251140687976111	1.15733841101786	0.318455969460269	0.0438277413660628	0.0327085258565397	0.292776725398294	0.630096521906625	1.19112600337931
2008008	21	2.24176096578963	0.857504171093983	0.334189613430444	0.29347150342966	0.434281095822759	0.297252125605623	0.13410965063169	0.604715002338042	0.811646285878832	0.0572291464632393	0.378558108741787	0.0361646105485309	1.03527210823046	0.316464430609761	0.0664675487797417	0.0362176391235109	0.23458045250118	0.750321669763908	1.1095159105213
2008008	22	2.40168681506081	0.866335614819484	0.204671870016857	0.185400520829122	0.569714370270526	0.288839876685795	0.075602653944958	0.645920704652699	0.710367599093094	0.394853860183992	0.356671526721804	0.0647864000471648	0.950618274479974	0.301688507512402	0.0787248231969082	0.0560963022160582	0.238930722730355	0.93529016557246	1.02789217905419
2008008	23	2.28459153707985	0.873245749965609	0.12778552958977	0.212585367549289	0.702780552886793	0.33808838314575	0.214655991324147	0.873453762593233	0.393299146512636	0.637253260464582	0.329824662634151	0.0865426667675131	0.956452842388598	0.28456052631695	0.0752226356135159	0.090497699332234	0.203452332604651	0.889656803193854	0.77175532508641
2008009	0	1.78216050315874	0.879300909335659	0.103102625357213	0.450991693614216	0.762715749145451	0.399843735215028	0.359149207604898	0.987107698928913	0.0800206239414471	0.895802350200255	0.300710210860615	0.0759526187642265	0.64284291408269	0.270471570574216	0.0845873443164545	0.0955192278170342	0.170004157866923	0.456408592136961	0.573947635654205
2008009	1	1.53863753133505	0.855063624257404	0.0901721395223549	0.530728943643687	0.806607506203205	0.411723996808237	0.46104412489919	0.966708343873211	0.387539117321524	1.24890853109056	0.298336321873441	0.0578051943202793	0.224556839047991	0.263068193949156	0.0784741018145072	0.089036261268976	0.113769044769899	0.0876422417717878	0.51007165357052
2008009	2	1.58862858361143	0.859434840785891	0.0891753436507795	0.658431614902964	0.768477652295742	0.388697253458225	0.667828441962684	0.903913277580475	1.16564465399377	1.86940608060564	0.290860429579323	0.0417159133079273	0.0830563547180539	0.26675589947186	0.0622707391556478	0.0745010682434899	0.0909488897319302	0.120250516077435	0.491712044883919
2008009	3	1.38929589091763	0.857736002922209	0.0815388118539496	0.668194752071394	0.692626730831278	0.370382986316998	0.823302196184732	0.659484767227645	1.71934061244036	1.5036266108499	0.268357313162944	0.0341766858498765	0.114924980162142	0.305941743420133	0.0588825188829326	0.0595825532750123	0.151812813749449	0.76590880164883	0.456293238816116
2008009	4	1.19700373758206	0.786934698287381	0.0745012503414992	0.663803165073772	0.685577982287638	0.359167177176043	0.752001386517584	0.614591441137157	1.51102202846226	1.41768933359705	0.251940025499809	0.032842408701249	0.142535870041905	0.493987136820712	0.0646051617641237	0.0596462693095376	0.22285593538879	1.56318502622289	0.473939445631621
2008009	5	1.16787841906501	0.556244888298962	0.0619676498872487	0.630449541601824	0.787442095351037	0.392309291518944	0.638087172780874	0.699196390247104	1.29746915519201	1.30987884977777	0.252539226812569	0.0391088659405387	0.609279031629454	0.614123577046796	0.0722481773166773	0.077376846481026	0.208694254091739	1.77265397217806	0.461984290899024
2008009	6	1.25181335593344	0.478061057327293	0.0515599515233819	0.522880013785183	0.830624819325728	0.507365449554287	0.500196983599087	0.762894411660781	1.17633431378778	1.42964620662124	0.257293902805236	0.0472236967536259	0.856388501570276	0.524230390587055	0.0701824305994616	0.0965722237216638	0.365548931892465	1.40241035138496	0.217122749999155
2008009	7	1.61537838472991	0.431107399461984	0.0482755388962385	0.409395546826858	0.806201149055248	0.498548939650278	0.426930115779735	0.700198767482031	0.958894706922649	1.41296901817178	0.258151195018983	0.0518438561030959	0.380730471344347	0.429719198637495	0.0537203556970502	0.093307103668612	0.488148517072672	1.32396939008258	0.198846711184118
2008009	8	1.29208191806484	0.365337129666305	0.0612081178529595	0.398463357825863	0.693644522773588	0.302531864159421	0.548375234727084	0.604316506862237	0.841292280489467	0.816124522614233	0.260625995733587	0.0515770884229528	0.114634488317887	0.271405186556906	0.0337574864919149	0.0854862247408295	0.534179068763675	1.12147968011413	0.263836401074443
2008009	9	1.57258790008263	0.316787988703311	0.0701239428912433	0.388152280841114	0.506998199166186	0.179006035162825	0.475327786048299	0.512210531293873	0.855950795002139	0.922579614048448	0.275015253729175	0.0494705840534711	0.204501367477452	0.133666235541212	0.0670828553498439	0.0968284331982901	0.594749125505016	1.01782267140575	0.357259885536273
2008009	10	1.7476109178073	0.316011185494483	0.0917745358241938	0.338524678612557	0.416611839281245	0.162076995926072	0.320060893004883	0.434402839871201	0.947825440353555	1.76908533998579	0.308452114832869	0.0474446013350226	0.502994369544267	0.210693313742843	0.0931020590394009	0.101875461183627	0.674109095493545	1.09688889295566	0.618104725323417
2008009	11	1.82086072927799	0.432124181684925	0.0963354407997981	0.267172359685867	0.371793405550418	0.168335608720322	0.604832289749526	0.380073026503614	0.974865720573947	2.04628690441352	0.330587662468292	0.0457797806822386	0.974303078539336	0.47802707628258	0.095083543419392	0.076700147168681	0.58051825271736	1.09729891345794	0.451108655138184
2008009	12	2.1585198976822	0.36125083675334	0.0927075994747882	0.251521510080553	0.329066679357952	0.179733943866598	1.47024286076819	0.262589531048845	0.616057436752207	2.20367535729958	0.366201176329764	0.0449456928483143	1.69956397044331	0.450370933399619	0.0908171507244047	0.0638386098259121	0.429489998294508	0.720217178619732	0.347391292701327
2008009	13	2.13004887830058	0.202572406717175	0.0900240301122825	0.26403807624979	0.293357091000031	0.210753183730682	1.57865867824253	0.473650300832884	0.791207834149848	2.20389986992884	0.404004541950925	0.0456902346009186	0.830583821750586	0.384080838872096	0.0993077667503734	0.0613692847340965	0.338966221819334	0.94200746224651	0.308925690770473
2008009	14	2.13064863658474	0.108516647946175	0.0871374022014667	0.335127190919086	0.265625323759197	0.22878257310887	1.63527015693803	0.895071473034761	1.21713757403736	2.24583791104512	0.444066392653721	0.0483952269091446	1.44998565593524	0.482519344836571	0.112333979721334	0.0579512961994817	0.320608490383091	1.43682275878505	0.318934937510652
2008009	15	2.27793477595894	0.0870053930648674	0.0832726602578938	0.345655130267737	0.195689588817056	0.198520177539477	1.65100118263052	0.961888951554709	1.1871346208174	2.19435898342527	0.47100405778808	0.0532551757420483	1.5641791646622	0.816688918624169	0.100579093081352	0.0440455082837723	0.254402002783058	1.32454466489214	0.368476255441461
2008009	16	2.31127364807808	0.0872067299707114	0.0757857551090994	0.288875451731741	0.183333740645923	0.134288221313593	1.74471568273678	0.915497528391537	1.12901779910924	1.81623050117467	0.416161295168769	0.0617604123055565	1.46547204157676	0.677396361955167	0.0684866316133184	0.0344895144609668	0.215386250184748	1.47533177740582	0.554207894475377
2008009	17	2.17151899754814	0.0817518429323576	0.0650741498658856	0.242263253266609	0.219163922366133	0.0967441065486308	1.65583372472581	1.23724793422612	1.42893564127957	1.88651441561874	0.354535744019649	0.0846951020156549	1.54976635509865	0.348557831025904	0.0537761157777917	0.0436243619890655	0.20295622456326	1.71832860972438	0.636289167059973
2008009	18	1.94719816707752	0.0926642891243165	0.0551330363148623	0.204364700326558	0.300846002653724	0.0935207047268152	1.53096679024689	1.35782647661088	1.65244161694817	2.10365468631214	0.768158725881106	0.124114591519308	1.4480156583703	0.429004632161219	0.0480278165226941	0.057594461763592	0.175937813500537	1.77644195712491	0.603820730337199
2008009	19	1.9504975352681	0.089740338647605	0.0431722078982572	0.149427610121409	0.370554548982083	0.0881993830457782	1.59683483610453	1.40246676987035	1.65005500276677	2.24791628531415	1.18850801798322	0.163843623790267	1.50508651845315	0.455542506619849	0.0430620473766148	0.0638731092430205	0.168081933614766	1.64565802053691	0.566268442149011
2008009	20	1.93251723154993	0.0896355622153237	0.0380498271183048	0.0983856849181642	0.526004207141824	0.0730158666385706	1.61195556624038	1.26136373796945	1.61824696035296	2.15804451558867	1.39235736950416	0.199872217665314	1.1955897547056	0.395679874192949	0.0392953712924067	0.0721461689588228	0.229752515150446	1.59214497372665	0.573609693239332
2008009	21	1.7726923866591	0.0898049795132042	0.0351685144079068	0.105220662693023	0.606271498640336	0.060033952216366	1.4037511831048	1.01528858809692	1.6572049604106	1.88144754940419	1.31381721234133	0.248817454405289	0.725380853923228	0.386168091233313	0.0382112448869272	0.0742897463730483	0.326989819188142	1.72694942946003	0.656541345987334
2008009	22	1.58732693461718	0.0925662056560169	0.0327937683233842	0.122855222296331	0.516504526116321	0.0508379629878735	1.30165170356454	0.749212278967865	1.58036930924205	1.70473362557206	1.2260606750485	0.317768630585442	0.671951687885946	0.454706808131164	0.0399988801674649	0.073180877620114	0.449356553363564	1.84207831394309	0.764899884192903
2008009	23	1.57693754445629	0.10791362921255	0.0313865603946306	0.104090078902388	0.314092642880574	0.044937155493615	1.25796894624993	0.504007968205544	1.60853206048318	1.66950113202784	1.21902411146528	0.328113961425336	1.07668478141676	0.523201666763938	0.0447404070558469	0.0737866628786391	0.589555240977618	1.90876228116061	0.815894101542228
2008010	0	1.46664615950444	0.185411473399655	0.0312845329595183	0.0880773671939112	0.178628575152444	0.0404857639097234	1.19516387898038	0.310672394820745	1.44856604354009	1.40634408615652	1.15498067645052	0.296497680968079	1.35839513777611	0.517613816177894	0.0503691506540668	0.0818213101712268	0.629735101974455	1.90187061226455	0.839040173483615
2008010	1	1.46600690987487	0.207271466556052	0.0317687405105938	0.0809387431747837	0.120471650862861	0.037299121423919	1.07387719964251	0.233301250583335	1.43432841805754	1.4375480814934	0.929685312180064	0.21253040860452	1.36762968261543	0.426551728696854	0.0675525174698074	0.0824184579064922	0.590666164903746	1.68715512685309	0.91200060547965
2008010	2	1.78940752549305	0.187257943708895	0.031486371327002	0.0689494245392924	0.0882417681244654	0.0347468834525354	0.97426320310473	0.340962478153417	1.45774244024707	1.33592282131145	0.728293363133653	0.131525153775484	1.31416440206054	0.213721666621246	0.0804631203991891	0.0817179317662514	0.602893514024361	1.58870782525478	1.17586177867714
2008010	3	1.97652650585637	0.214074521862366	0.0308428464733424	0.070380981858563	0.0746253384976275	0.0316939547929093	0.765392800588102	0.570418737944577	1.34558690643761	0.965052709522245	0.750588760336825	0.102232125301821	1.31294412042081	0.190619278743413	0.0865254365272598	0.0802730736595756	0.761771912871945	1.55731799683528	1.18467163623359
2008010	4	2.56133276835909	0.264426397675208	0.031302997365888	0.106360726645903	0.11431577102976	0.0271086974449007	0.750541031689524	0.692482216511438	1.04050420350798	0.920486399236676	0.79231021159504	0.106898232873262	1.11276175492987	0.281043149389407	0.0881921999100413	0.0781026695997992	0.854379878300794	1.42336628288909	1.08817958173067
2008010	5	2.578914422176	0.29987482086309	0.0318829431755805	0.153837320090537	0.220631802444903	0.0205363223116561	0.612094269616575	0.80571566175565	0.908487510244512	0.275075142047556	0.784871652570931	0.184836585968455	0.955178321913501	0.531619169307604	0.0839981356355909	0.0748808188653973	0.713292087032306	1.20266724563812	0.922143443977069
2008010	6	2.59587340565143	0.305126601617463	0.0371237378989432	0.159524213346798	0.256727167331672	0.0180192058427548	0.491696614825043	1.0174073730261	1.07861834325922	0.233698216491644	0.673329591026144	0.268673078014004	1.06445859916404	0.390334411102516	0.0736892497984839	0.0708177310838249	0.429815221211822	1.13655638642091	0.626361543349436
2008010	7	2.72134950041483	0.310863903092037	0.0521829961984845	0.146152821712249	0.299721941795026	0.0241231143230786	0.336111246408064	1.19282030804947	1.20629824799009	0.653914121753992	0.695086314508765	0.267869013591316	1.14423629865437	0.307727016015679	0.06353344302874	0.0669717566843053	0.376415705382372	1.59422984589208	0.40744224271531
2008010	8	2.86648355451613	0.42294008647087	0.0509030402082899	0.13604030305292	0.357269530713056	0.0506434102651336	0.264779105923179	1.13415779259367	1.80860384177699	1.23499456772237	0.875226360848088	0.275633931444459	0.998770224151597	0.430493848609253	0.0586084947077948	0.0648038013419122	0.389617959003071	1.89517490477134	0.303182299803983
2008010	9	2.89849719929322	0.486145072892567	0.0450031633596429	0.170689433422306	0.434902364218436	0.0811669692317266	0.357589679366339	0.878238362730289	1.85172681638498	1.17288654033554	0.969280116223238	0.290195621129139	0.941159678162447	0.585937859815262	0.0549795314592796	0.0558527740499804	0.257195530181436	1.80496872222359	0.267972156827982
2008010	10	2.85533131281126	0.346394212868994	0.0418501211571505	0.232225310328565	0.414558838378361	0.0885430148279774	0.403186344963846	0.755827273480807	1.66115703919098	1.05206998178454	0.937394291692718	0.296142376145579	0.90986934169856	0.503126976698991	0.0509899514561684	0.0685049906627286	0.201313315589896	1.55320734372475	0.303874691765785
2008010	11	2.82203616622941	0.185452634220595	0.0389147153049906	0.276178128199368	0.302390002579717	0.048247076630072	0.450366649243925	0.774786864029835	1.50614732546024	1.05643573674609	0.94320114776659	0.41198188001992	0.830677274610189	0.406063906088055	0.0468467485344938	0.0633631808853371	0.172805919139386	1.35757750351145	0.585973699456319
2008010	12	2.7154784797083	0.138586123569327	0.0437874543974173	0.284868114085168	0.395103796259974	0.0280705942011591	0.588389244492231	0.741248525661438	1.53375014509873	1.57454805678969	0.955574924364561	0.502952248833446	0.773587598056723	0.296506386016361	0.0437520682281643	0.0523437491937754	0.159283062124299	1.29884646012257	0.605033647518828
2008010	13	2.27400070540055	0.178277529392824	0.0436665587646153	0.217548526952031	0.473350849261236	0.0297210837985844	0.653820940901919	0.65675894232423	1.79472718137415	2.01785255717449	1.09822973385763	0.489402809643964	0.709932646868033	0.231479393324564	0.0415540655254531	0.0525547197563307	0.188412187593849	1.29958418564751	0.492596923335525
2008010	14	1.75472623818935	0.162115015265521	0.042667659776262	0.152472923304983	0.494085932770632	0.0390410814927795	0.666779462678554	0.587841022084936	1.90179667346933	1.82262750409621	1.2198090512718	0.48426470811974	0.68772965460898	0.322461862300811	0.0394929118661102	0.0592689332524776	0.176669795391837	1.55200373796922	0.333450591671345
2008010	15	1.49851789147733	0.150516898775431	0.0383176207676094	0.0641745825433781	0.526283755260147	0.0455942892027913	0.719480905052485	0.565960922753108	1.81289750453434	2.08468076377325	1.05169671737793	0.38726030205084	0.696770786172042	0.400865849828689	0.035839152404307	0.0639221720927817	0.175283081498579	1.8550969512296	0.294178987042361
2008010	16	1.4826963746859	0.133309287546841	0.0309542503046515	0.0393164471367239	0.480315517550759	0.0645355447013027	0.66720694339504	0.567219734756771	1.59177451823808	2.13626559107526	0.911778360091109	0.456447504488393	0.795780760790312	0.489158938036418	0.0319702351960627	0.0625360947888261	0.201534899203893	1.68556616459105	0.149711425520543
2008010	17	1.54350061492622	0.0964935452594137	0.031321450004473	0.0263043986867081	0.441783974739088	0.0695590771125208	0.5512025974618	0.537360604356054	1.33337902725334	1.9674465187072	1.22743990707463	0.547301844152205	1.01100267993228	0.55871392352014	0.0287265574903613	0.0586428679666468	0.223813247596526	1.21126687615229	0.101917600624073
2008010	18	1.66209185395257	0.0533434016714911	0.034663395285715	0.0273756159976418	0.293190318868972	0.0594740153482858	0.495559551880302	0.47960645816662	1.13165634424556	1.87604064803271	1.09648780399884	0.522063175866415	0.899208434602304	0.613874132964299	0.0270113481670681	0.0525090994679753	0.226706174589687	1.69407058592425	0.175726224995431
2008010	19	1.54608087804837	0.0494976318399753	0.0379220066248412	0.041168556261414	0.202618501231837	0.0584229525384697	0.336535290037357	0.389750826255973	1.16522772361821	1.98512428807987	0.778559698723916	0.444727562322897	0.37665875289391	0.690319746574017	0.0276414190511737	0.0495016912665488	0.211236863296537	1.50122085989776	0.220897931145654
2008010	20	1.41756541183168	0.0560337882338541	0.0434991445500091	0.0556668092677834	0.106415518361643	0.0523005905623161	0.306386399877348	0.354570427476866	1.13840001950565	1.89986321255388	0.772548410921173	0.422162535729375	0.176976264562454	0.76148087182196	0.0344340289916696	0.0472252430645301	0.236806059725144	1.46760559646425	0.220599248913259
2008010	21	1.82418681729863	0.0549608906730072	0.0461187414246831	0.0616114193616417	0.0814159227629193	0.0433957083416191	0.261442399948373	0.323694830782455	1.19247146857057	1.53418011040679	0.834881946207097	0.517529572867865	0.108136333764448	0.742035448751671	0.0447930242723304	0.0476089895713609	0.21492889072334	1.51101069522007	0.210855936060178
2008010	22	2.4466700122027	0.057773205827585	0.0438675000634368	0.0586578702593512	0.0857752348232828	0.0390105463144196	0.211288067751334	0.217113817983964	1.35251248350531	1.01337518221479	0.865822935331882	0.558498943136959	0.0643857653446981	0.644319563500219	0.0490947930147833	0.0492353701407042	0.247976603427913	1.87731444765831	0.208696174382232
2008010	23	2.71771525637741	0.0555796493132703	0.0439051934949622	0.0481297737440903	0.0933748081114726	0.03538040274748	0.16033233226225	0.30526912118935	1.36731664596962	0.59012810850188	0.863912406021425	0.542996086763977	0.0495183331414979	0.589302141719315	0.0505481169278094	0.049951376228594	0.278928579534464	2.05197045961928	0.197809586838163
2008011	0	3.02500593564981	0.0467596872015738	0.0442175816384993	0.0421764401796215	0.087476374572805	0.0393997565139292	0.131345466349446	0.351388774492891	1.18032916905281	0.712385587839215	0.861773866537477	0.51512244733049	0.0502855088265138	0.54556418896623	0.0529151840178237	0.0488911957049917	0.143403130075708	1.76968068402847	0.168867548307832
2008011	1	3.22742707237824	0.0306369243285771	0.0407311114255761	0.0435487568039995	0.0906214531794717	0.0458314274929834	0.166427876063217	0.386491440191262	2.32359047065219	0.901626549237972	1.02286158057664	0.491439491978042	0.0476455046879098	0.494148204743879	0.0554733352325685	0.0486834861967069	0.153463989371167	1.32278963841775	0.156996964509161
2008011	2	3.2795599147686	0.0295398339884253	0.0385412164837043	0.0389788460712077	0.0732040709727663	0.050099000297559	0.160931325282964	0.470794286113263	2.81508263253518	1.31275076961384	1.46815906544051	0.40585169184385	0.15731907338866	0.437037855109396	0.086785795700831	0.0529358035592694	0.14961861575137	2.05141536597815	0.155855408237724
2008011	3	3.19254846928943	0.0333853982999187	0.0394427201212103	0.0288577322499171	0.0588415620622997	0.0513189180757389	0.173166467263776	0.491022112646769	2.88474774560271	1.45825981825164	1.55730697410468	0.340879838477531	0.288715319749313	0.331918439572779	0.0941972028375227	0.0616896288587872	0.152483229782792	2.66484585871302	0.1701493183026
2008011	4	3.08580383559896	0.0275946647089644	0.040968583212172	0.0261929993910719	0.0560388180296745	0.0566825967053981	0.218595444343353	0.486660844824321	2.9702160123268	1.50232646306503	1.54327256278813	0.335007711797809	0.38923540221685	0.24025705165081	0.103468812712374	0.0689006504012035	0.158198955731554	2.63632019760142	0.222848317086196
2008011	5	2.94403313194001	0.0173126428791927	0.0424253128928249	0.0253242706403519	0.0364387762606374	0.0627072134324707	0.238453353574709	0.486446441117438	2.84881953154179	1.54821119918092	1.57195466954501	0.326197154605257	0.370544543895627	0.186412294440957	0.109438985860938	0.0716114356804384	0.137382050707432	2.55189073438841	0.207338283362583
2008011	6	2.54450966005103	0.0055638553899745	0.0421304456276367	0.0260606012806982	0.0308038393628417	0.0616568655018735	0.316165697018072	0.430115035356974	2.57035658229355	1.60966162919627	1.55331195978488	0.316569305007254	0.198558116579171	0.179377087005193	0.106134572066051	0.0701795758802556	0.109379186853662	2.32969234239085	0.161601271514756
2008011	7	1.19208839679108	0.00269748202222586	0.0412285504053685	0.0218411938750582	0.0295512858235814	0.0561009616569147	0.452129421951684	0.389599945935272	2.17326941804985	1.74338692570439	1.59810680509619	0.308023414313822	0.0971681685889222	0.245556976704746	0.103239127999925	0.0672037488149856	0.105141203658963	2.02792847605026	0.118599275669566
2008011	8	0.809335786406216	0.00456318952471938	0.0402900697748337	0.018155655208942	0.0225170146230895	0.0487740596518932	0.465716067095602	0.356002095613157	1.75409695048371	1.88169476813355	1.50162961508458	0.320499629903988	0.193420380269231	0.3254303606866	0.101960536134627	0.0606315477491341	0.106383105718556	1.74045057181279	0.0920031114160559
2008011	9	0.647566781930557	0.00837798496572866	0.0396916820466311	0.0131872311239811	0.0158372622107339	0.040778889971972	0.621677129248791	0.29090647597775	1.35286940574976	1.88113629206835	1.64706235741116	0.35424245022934	0.267100669903674	0.403183613151981	0.0996951148645813	0.054641374586371	0.111326554980177	1.56143764684951	0.0809798168740695
2008011	10	1.10692891305627	0.0245734692487974	0.0387420108748998	0.00901750384247216	0.0183279045045517	0.0313326177186394	0.977749919608431	0.223523772424863	0.892647431160771	1.88401326210922	2.23486791011867	0.349437696894306	0.336380380556895	0.418639554789534	0.0951054595539888	0.0545811112178244	0.106272152506392	1.38804734017179	0.0656477437822144
2008011	11	1.28522887538363	0.0220725435314718	0.0351211925916907	0.00863736469502679	0.0274191244635319	0.0295377218901759	1.38159709496239	0.184886460488419	0.478055473419569	1.8759022946915	2.46452034870766	0.315435658071743	0.688543940352087	0.409535561018245	0.0906085391249961	0.0478931955469619	0.10688584823325	1.29421027838448	0.0575600430044355
2008011	12	1.26297714091023	0.0188402285206423	0.0315800755584115	0.0129559964765268	0.0281717880008002	0.027337615943864	1.41857047433182	0.14773417414113	0.264970043179837	1.83633104729067	2.59644059697948	0.24964176993743	1.12144587143123	0.400996941875636	0.088591994757048	0.0439949202974348	0.103309593556956	1.17995298668213	0.0544022792614466
2008011	13	1.38039483532424	0.0207650463720593	0.0298009847520325	0.0164545187133954	0.024764327922716	0.0254193779242605	1.45079828981111	0.107226948648408	0.164977564477111	1.78665298704499	2.69447009505588	0.274799130643725	1.28221217973728	0.386806429742641	0.0822248576383528	0.0416914871210229	0.0993539921144882	1.15463349370578	0.0192588828172132
2008011	14	1.59121521548315	0.0161671888994205	0.0258867538327836	0.0170914202499587	0.0207249408658372	0.0246135860002105	1.47785199658595	0.0594421329409039	0.174939955632486	1.74667421041151	2.70683247288255	0.365761216462925	1.34131292311857	0.36343485906778	0.0763103222605958	0.042236656211774	0.0823359320087086	1.26849690825971	0.00514951308903775
2008011	15	1.74386603800912	0.00901488349626227	0.021847505717041	0.0127945828987755	0.0128284321930543	0.0237054693763938	1.33819249945314	0.0333787561543155	0.346356694387614	1.70323404117338	2.4096398199548	0.455406309605439	1.3353139825864	0.340430331656394	0.0649195567286111	0.0441253269150141	0.0666540880778644	1.30827309360946	0.0149827050221965
2008011	16	0.772249984773022	0.00381577262881764	0.0169156638024112	0.00980879361029221	0.00762968771542972	0.023903952880705	1.22658057559698	0.0208470473446737	0.651405694427957	1.64823612486759	1.79163381083701	0.60361110402363	1.3517191442411	0.31672537589868	0.0520119508148081	0.0428565835957669	0.0566261537513829	1.30225087933801	0.210429045905762
2008011	17	0.64207329586352	0.0021149390251851	0.0119772768503514	0.00982608110263502	0.00777141458948078	0.0282674589114692	1.16938222517724	0.0134267185846351	1.05723306426824	1.58959542955778	1.12268503719998	0.554133572215574	1.30500879186844	0.291428811548755	0.0334308373539228	0.0436540616631856	0.047957586546835	1.29805429621977	0.396677011834771
2008011	18	1.28812584480466	0.00190218204051516	0.00813510919221773	0.0103079151275655	0.0118447007278207	0.031423575523019	1.21165226175156	0.0103077341799416	1.04420420361886	1.54954560763397	0.885344276009464	0.527936601969159	1.28016108844423	0.268465556713759	0.0275556947480082	0.0433837128790332	0.0383835793008652	1.28913955328101	0.387339989973512
2008011	19	1.65425910460195	0.00205069300725797	0.00593288383897968	0.0084888826433937	0.012238647422436	0.0349148234892654	1.29307477245234	0.00686950788265361	0.893817537982516	1.47798943745676	0.724222031546136	0.522110672092118	1.28635305014731	0.250010447527201	0.0282973374976469	0.041859468132733	0.0368739207969623	1.28068793019109	0.381168299018722
2008011	20	1.37015616601912	0.00282198469110136	0.00463330315297516	0.00503311776255904	0.00939372367522887	0.0433495433788651	1.22191030581408	0.00535960888341427	0.699084936773049	1.41443213803444	0.686862879854797	0.517888914021412	1.27303475110106	0.238311558586513	0.0320942128542743	0.0397025212352755	0.0323302377886587	1.27739805780702	0.336824580762989
2008011	21	1.05500924222021	0.00347174221672781	0.00376159156010035	0.00368767326088374	0.00647853953832836	0.0496226732962448	1.0682151476719	0.00502358789341018	0.360978605084165	1.27832917397329	0.660406917798229	0.491121770712145	1.27287069939542	0.230976681050362	0.0354428780703208	0.0375933074116129	0.0314874843430298	1.29071276147289	0.203698831833863
2008011	22	0.873421953809993	0.0127245437158208	0.00336702452385485	0.0249046943882109	0.00542467659375106	0.0479887322933022	0.727135585273581	0.00384080701561039	0.101446348896211	0.949029208147513	0.627719022665485	0.424475597060328	1.30049521000953	0.228219002974537	0.0387332774821793	0.0357372285278363	0.0298313874085757	1.30565058214941	0.132460162025954
2008011	23	0.594863709904088	0.0232043628598416	0.00300557897854093	0.035458411533356	0.00444423777023421	0.0431997748044326	0.274180661438438	0.0026384762203076	0.0187858918424185	0.489836155741036	0.580135774928947	0.390765209676721	1.31662659207467	0.228323441595708	0.0498131941742244	0.0348382955457047	0.0279958377851759	1.2930169708815	0.145171093999363
2008012	0	0.513551175208055	0.0245807180857855	0.00249288289954335	0.0390471110907897	0.00325295609124566	0.0390550965266308	0.0544390754613633	0.00234570548187834	0.0097785434503607	0.313374375043886	0.555985604911242	0.311849013422545	1.34946903425792	0.229906321621437	0.0514189008700361	0.0343086680595079	0.0259081966824503	1.15956937218632	0.233399717372962
2008012	1	0.438940508693666	0.0200247475022081	0.00279496768713232	0.0395266196203266	0.0105056724234457	0.0363647358074342	0.0294601608089148	0.00278294882575242	0.0236325058303678	0.391250356584995	0.51854160197625	0.247128472644386	1.32871509875806	0.236979171572663	0.0536093464550968	0.0336890742056379	0.0234752124736076	0.633562384067428	0.301176587856061
2008012	2	0.388812968955114	0.0147209933612534	0.00211011918552438	0.0362103537491645	0.0305554269976649	0.0353117983119687	0.20131199247373	0.00395049875557699	0.033283408865495	0.537760716957896	0.448983135428404	0.373849231564663	1.2707360826149	0.251806010889017	0.0565523976926874	0.0326938166718416	0.0218224348562983	0.211091926541352	0.422996526537027
2008012	3	0.310958322155925	0.0101745381868416	0.00795360251344885	0.0332137862797728	0.0309056058581346	0.0352284987367265	0.438855870013601	0.00631965413592885	0.0280357181861931	0.595540360063569	0.384105310017504	0.365108953221495	1.21941251080368	0.275845173537907	0.061892945139164	0.0310952880627874	0.0251733040078965	0.0804127019637016	0.572065236047924
2008012	4	0.238499822130857	0.0106917009863697	0.0266448332195294	0.0306537700607468	0.0254709331260446	0.0339191655556784	0.462515857393896	0.00535836660650237	0.010544325724274	0.635294566564139	0.340097853414169	0.2210258518649	1.16355599290187	0.306833113407903	0.0633285328666776	0.0287202809556002	0.0305341148557937	0.0333473845796234	0.638875282242379
2008012	5	0.325640588214984	0.0329118623678979	0.0753070863116572	0.0279273277978706	0.0187134112736129	0.0312460491945594	0.437625947201286	0.00575919672696592	0.00369507056985768	0.556043709115303	0.316898062107714	0.153545999470814	1.11095408633346	0.334539898777252	0.0622450238507771	0.0255214834993003	0.0339968153431479	0.0247192327076416	0.597882597081076
2008012	6	0.470376332452139	0.0820478364501011	0.173304724857256	0.0255593034133257	0.0104783033807731	0.028389076556439	0.385213797127113	0.0209911024163542	0.00383055854724977	0.430634625300942	0.314801866228165	0.207584684579809	1.06112483386007	0.355270195630786	0.0550833925473623	0.0221920897497823	0.0385821595543075	0.0227220305756321	0.464395049236882
2008012	7	0.482020094784953	0.13280104641248	0.272048180201172	0.0236313536580973	0.00674207868270694	0.0238584623430937	0.317042742204844	0.0701104432392516	0.00690205238934167	0.38858523900743	0.335497496922654	0.289543485783926	1.01558223509187	0.376249535899714	0.0467317790219479	0.0192456318793979	0.0459523160119668	0.0348412786294444	0.415789488684195
2008012	8	0.431583689385936	0.130689789930669	0.346518046145551	0.0213963990136554	0.0126605901516034	0.0200272525279871	0.243918648620091	0.0749358318500199	0.0163322873169725	0.411852831551089	0.383404580352718	0.292738714358202	0.973519478296678	0.400599423459711	0.0371167718002695	0.0170139406495349	0.0494545661682894	0.0761963678909087	0.45018640692529
2008012	9	0.391533125380444	0.183386586344029	0.397704307748864	0.0197241925803156	0.0291340859510168	0.0186275265672738	0.226710265693509	0.112213579593252	0.041474145305479	0.405931272860816	0.448185980443371	0.29289141011218	0.927218470108024	0.453237873780932	0.0294112677234846	0.0162832972341461	0.047201129886437	0.178740944986853	0.488464509773701
2008012	10	0.341584384932283	0.323975215400825	0.442903804136705	0.0482460478243128	0.035451681169797	0.046176514437816	0.316372321581026	0.221386791147297	0.111058076096835	0.337694812853896	0.467943294756358	0.298308912013014	0.879513461436229	0.706488503457254	0.0248113547909464	0.0121162867513562	0.0463969053783602	0.331284523554487	0.490971288386572
2008012	11	0.408654838608754	0.364190568094833	0.480182214229245	0.098159939999461	0.0551636769982132	0.158076736378111	0.278465129159359	0.253581841846491	0.199566592614593	0.258669656436034	0.416708940833476	0.294571229118719	0.837189796399565	0.882414359555593	0.0217493397782296	0.0114532260057432	0.0486156185985128	0.463087549565029	0.490744543533053
2008012	12	0.84267305621893	0.278441795729448	0.45754967786206	0.132685707387553	0.129597761280964	0.31159035938419	0.19944272120119	0.170612602802731	0.176498827085302	0.188795951950165	0.247574671902312	0.293517437280499	0.803492513694442	0.918694213064633	0.0181329055906023	0.0116376746474241	0.0523403279697275	0.404264112500287	0.468638771429219
2008012	13	0.763648630265565	0.207395944713242	0.427812381899031	0.261572091875299	0.242222295658208	0.391263366572143	0.154060553294409	0.240587655709512	0.220951980768712	0.130429068029465	0.244764587493859	0.303099454625385	0.787663241231901	0.918369111434444	0.0153890213209734	0.0127393476874203	0.0483929116155261	0.23423789621702	0.466417619532349
2008012	14	0.855016296159215	0.189669147008862	0.409128478052827	0.291401763407095	0.183044214005651	0.371015291652232	0.0745012919562562	0.27970217174716	0.258035368757957	0.118218392627783	0.577172447682549	0.311442296928623	0.789625026933218	0.915765998010835	0.0144376091419708	0.0142682418919532	0.0488563835854655	0.229351781415345	0.4941874590649
2008012	15	0.846140088063851	0.17800754123709	0.404278585075945	0.221906034243622	0.139756764339924	0.3035029876451	0.0263946219463384	0.574020167754956	0.293484205648817	0.179976472729351	1.44083257760389	0.307991528771805	0.809235768861734	0.901009991071082	0.0136478917330604	0.0147356474445696	0.068096993199678	0.284588707504442	0.527298583961888
2008012	16	0.806408557228411	0.17991921833217	0.399503591370081	0.178315997216344	0.197259619952755	0.292831953547527	0.0458256352716143	0.641895463649285	0.190258885421371	0.22118449797848	1.76789828516497	0.280772050089649	0.836486186388053	0.887680684891815	0.0130879693159775	0.0138657168647883	0.125497876494865	0.321768026806115	0.593476660921
2008012	17	1.1818493449249	0.192464449952693	0.394748340761048	0.184340090850882	0.322160229916922	0.294615071745424	0.0790272547099988	0.573941012517857	0.0962522003457744	0.416710228339835	1.69698615297097	0.188490072374278	0.83314684096457	0.846748831424878	0.0122670856869075	0.0124400473918178	0.213291487372752	0.33959280740389	0.638854213757895
2008012	18	1.30204815118867	0.205374988999243	0.38489688372947	0.182866577936719	0.431836161516618	0.304018006398421	0.250415578324101	0.429371938823664	0.0788833340278819	0.604325948074675	1.54963325507895	0.070585643772494	0.809043113900885	0.795274288689085	0.01162866159361	0.0118495982625173	0.379988892454629	0.252899272818625	0.686043372614175
2008012	19	1.0927999505613	0.210096876678601	0.367170116704756	0.211073645843485	0.516694918773535	0.317957351110644	0.412958111446447	0.430576994833556	0.152758349956245	1.08522585944576	1.68061362007137	0.0296658885618776	0.804879680832948	0.752349818725295	0.00980871641811231	0.0139655911466913	0.425942666801	0.161394073501983	0.631094859435758
2008012	20	0.901640976074112	0.228790027984908	0.342278842874747	0.295504543913086	0.531138720667284	0.339408824473995	0.733901061020927	0.78871352181624	0.397927101936213	1.09278998543538	1.62266014233066	0.0261989726940587	0.796379171889615	0.717200984104671	0.0076679820373825	0.0150095092546358	0.344634000578108	0.432822958540283	0.602579479129148
2008012	21	0.967054871035747	0.235780501717246	0.326119036424708	0.358458395897164	0.613157445119114	0.358896439463253	1.02456076290181	1.01285190767761	0.513903925611411	0.827467346404671	1.2602540731	0.0477007731190183	0.848605569802249	0.680121988212969	0.00634808729756013	0.0141158422711474	0.380020531868289	0.505172589275097	0.502594764604567
2008012	22	0.993302492754405	0.232197766548007	0.317127407465083	0.414064129397271	0.786017500212679	0.367902945415488	0.928807848031992	0.922479139164074	0.595995510498577	0.715157462029345	0.737991912727931	0.0985935418806649	1.05197606658362	0.635154813653346	0.00548064822839666	0.0151331194482243	0.475662237222223	0.599901928294731	0.40979485361822
2008012	23	1.0246112444187	0.22803474843677	0.312612523197716	0.446122357008038	0.882967544322792	0.359887411168586	0.705015334145419	0.753443843760969	0.903583344720969	0.719558671697147	0.734943228285501	0.0940499173660077	1.09693111299722	0.586553829526618	0.00482347058590081	0.0212985673381278	0.59291242330234	1.01234833292835	0.40249014717235
2008013	0	1.0144788402766	0.232232842502643	0.308613280923936	0.406109904188325	0.801782291015396	0.356666325060239	0.665140633943358	0.721034623252069	0.781363454919919	0.770205177164986	0.792595698003491	0.0634793530634949	1.01560434412347	0.535278438443447	0.00479108995383922	0.0340777956014249	0.672140748815925	1.08700452176671	0.340793175015718
2008013	1	0.911595844322155	0.24956427214249	0.302202791647863	0.321832284208232	0.700165950739579	0.354019731714232	0.707750721757803	0.643493336591028	0.649957350724856	0.838851473428792	0.665284441833829	0.0569661258475106	0.924175891797535	0.487127972711304	0.00645950828807075	0.038853562492846	0.659735603114241	1.00814817544975	0.259945429834785
2008013	2	0.8508184110669	0.291806885813381	0.294094664172539	0.2572136113884	0.625046773128431	0.349284781019369	0.733330080602518	0.495151588014571	0.556082285156449	0.951711339180742	0.721388040623713	0.0859338517841779	0.86224912934938	0.444654972299818	0.0153004169404517	0.0415527039466551	0.660951601860126	0.624000530205489	0.225439869811957
2008013	3	0.553802900809741	0.387167182793211	0.287712768329343	0.236094127689428	0.491139092477913	0.343847276573421	0.783559988050722	0.386197862973779	0.517438082476498	1.09162693069301	0.761663955096136	0.123610786535991	0.776728491289989	0.408914908082648	0.0325567654289913	0.0463707299924042	0.822693715565839	0.502697698962529	0.213556591568305
2008013	4	0.526417143066673	0.489205668455056	0.282571140618059	0.221746280084229	0.378121574586298	0.351117016600706	0.882638159235258	0.324635197079371	0.545673432394269	1.12866009718648	0.635551866102071	0.153049017597676	0.715467234972752	0.380409082837518	0.0605824881946959	0.0533378576457479	0.980708025467656	0.447311757369144	0.210029858620107
2008013	5	0.665572304424171	0.534552168328432	0.280530218037997	0.217998571284659	0.310888844233143	0.354478382366947	0.991646518450707	0.319231307414259	0.673945472536198	1.04155167946155	0.541526315783529	0.238029699142067	0.664680776049911	0.358938506825953	0.100073196427224	0.0629599749530909	1.15338888977242	0.433655735369369	0.257053362000125
2008013	6	0.581927103180782	0.544790182500532	0.283598313314188	0.228213975442274	0.293594760421479	0.364372720829456	0.93613816330395	0.337070148939871	0.777090642072414	0.906527568191675	0.527420597649404	0.29795793858821	0.618757474417605	0.342694504585294	0.125855824021786	0.0769303173986839	1.16483053564483	0.500732213787662	0.295388541687639
2008013	7	0.527191400063576	0.55387929044894	0.376696261851651	0.268753446369499	0.303577350751152	0.36651392571378	0.79962650775074	0.362757853872902	0.852209254998413	0.799222648521081	0.638311646853953	0.310251619805209	0.548332293870529	0.331310407961743	0.136434423991289	0.0892945261567836	1.08116706840074	0.736021990067881	0.320330188173696
2008013	8	0.519213320726589	0.562341164466952	0.396670531948514	0.329558556377665	0.286903724351372	0.363178359512955	0.621272753327352	0.387342518579858	0.920269656021968	0.726153049708317	0.725741202282859	0.317396162650799	0.499077773681622	0.322956614831397	0.166854390760693	0.0934608051501298	1.01676890520125	0.920798042189155	0.364257985851178
2008013	9	0.576854868424068	0.590056393580952	0.391372157742349	0.382574006189232	0.2796302064752	0.357776263861287	0.509164982975106	0.39437434450575	0.893546990656189	0.644866930254596	0.822676535211038	0.373268095386161	0.485335937300381	0.315263111144448	0.188649447957652	0.130989357903995	0.986276449757389	1.02175908524868	0.525348074287591
2008013	10	0.644413946035358	0.638921577044083	0.362081142839825	0.453419562465285	0.315109275221504	0.351954682713563	0.42837517566154	0.363823796329422	0.660893995321176	0.580475165716875	0.95403683046311	0.328205772283407	0.530833465915425	0.308307351850455	0.195983497503145	0.253743569361863	0.8965429884517	1.03218024735877	0.657466199136194
2008013	11	0.669270981325409	0.612363223203047	0.343063248282247	0.479678691151337	0.378906277017027	0.343242027915239	0.317573016081644	0.310404295164528	0.522204415937733	0.576059697834571	1.07018721824789	0.290278118466308	0.623027692570015	0.303069914202474	0.19885129297981	0.255117160894569	0.721808243257095	0.863719698186279	0.645856907176341
2008013	12	0.752080385245044	0.542550603062722	0.34223863278672	0.500162712474419	0.429202763995621	0.357089806435734	0.289191843867439	0.296073853652917	0.435282869920076	0.673330555971523	1.07876718501891	0.204758534305485	0.727625252759742	0.298189728490088	0.205028799580632	0.235792871891981	0.548999910408899	0.649559844555183	0.595056780769971
2008013	13	0.864379858045184	0.493830037120296	0.348417437163151	0.503038150789791	0.472634173348075	0.353477461639502	0.298614934451015	0.279713521887815	0.365244372877686	0.730948095289542	1.06868031041237	0.18281072743765	0.598699629865389	0.2938355051172	0.213336914768171	0.21355588462891	0.453882970490692	0.571681121205049	0.499294432136954
2008013	14	0.970227883575385	0.46823361779738	0.355429803780098	0.468877937902089	0.521271426597117	0.354695091177267	0.339171415047575	0.245335491035686	0.356090067603082	0.789267775793766	1.04688296232829	0.171510185747169	0.236216525110253	0.2889207162814	0.222967595780094	0.200497273188336	0.376614334857042	0.444950819593064	0.339014314954799
2008013	15	1.03350115724407	0.445633886426673	0.356817416153578	0.433171882783384	0.564053512707431	0.355674114000737	0.350156524285002	0.221034696640992	0.380889725581238	0.913885846699464	0.955852094671416	0.174111736702065	0.0899893913768212	0.283759394896695	0.216789766224543	0.1940300895879	0.30168824864098	0.437770893081449	0.194490730554854
2008013	16	0.954123316388411	0.425337613179008	0.35625708074709	0.391659600183427	0.555421427973872	0.352080408011408	0.413157024346687	0.218770387282292	0.409170839750685	0.987723022753193	0.862773660407396	0.162761730150386	0.168010699164535	0.280473041343218	0.208467254868416	0.182398961498677	0.249912547136043	0.492121676258436	0.160935375376935
2008013	17	0.857007022644115	0.403184765670898	0.350800094908493	0.361452994201893	0.525627064373048	0.342357879281222	0.45129950910024	0.228584229178578	0.404691875940878	1.05573345779999	0.84163378162116	0.147853634452842	0.502988630568712	0.275824355169931	0.204651357829857	0.16390924379856	0.21365836460151	0.536632797930725	0.156969049589253
2008013	18	0.783052647657401	0.380104512230203	0.338455775016729	0.334782334672993	0.476225598446897	0.316194204477621	0.428911833040184	0.251662454956497	0.404379467879859	0.927149354520691	0.834796451829358	0.157973023689854	0.885989278756603	0.265126477756136	0.207950324081975	0.149697945155155	0.195528945873692	0.588710650982658	0.140337724308378
2008013	19	0.685490010777407	0.364510254562673	0.318667458185824	0.293964450125771	0.431609253863164	0.294349593703784	0.401340333698729	0.298442603710084	0.396538718462387	0.804888208171818	0.851785193535037	0.18307410326777	1.17912111077815	0.268552402401731	0.214207654814737	0.140931828071331	0.191694899557606	0.646086054556093	0.132523891867753
2008013	20	0.648828242334863	0.359677405158658	0.301471240430939	0.257168038445119	0.427825264945637	0.277845672549164	0.336690899694261	0.352360960100393	0.396494129317093	0.712033343279151	0.790041426230517	0.32715730821503	1.35971528795078	0.291160249712898	0.246142447778888	0.124804024830609	0.188558773036706	0.668205785679393	0.130517184287728
2008013	21	0.579316938000856	0.349172435108628	0.293083652513688	0.219299217938212	0.41027333097942	0.249253643568316	0.280982676931406	0.374683462785075	0.407425248132152	0.633307925895023	0.679337649286199	0.486726327094808	1.23124526053944	0.301452533773563	0.265873476523937	0.104343825039039	0.191695988764109	0.684408575396621	0.164032053019974
2008013	22	0.4760724786059	0.335868333731972	0.2930817382973	0.194182942800336	0.34213384633702	0.182432909032941	0.254477054306406	0.370721290236227	0.431392010599275	0.566597552245936	0.687742970588008	0.537755586594738	0.9540425806138	0.294516746744722	0.271689932187026	0.0807425647087998	0.223131393549196	0.668191650827606	0.231795108160992
2008013	23	0.429357951637633	0.325334146526091	0.291122837848628	0.178291680548385	0.295711455970372	0.127402456762394	0.192561790869536	0.35529986612756	0.456793820751575	0.42735754238043	0.78781423323812	0.672597823092004	1.09248981543546	0.26646874669533	0.255466117864723	0.0574763838839869	0.296256630340584	0.657530994627924	0.273421415422606
2008014	0	0.440261838506788	0.313799525884304	0.284109448204446	0.166374553319647	0.257144710882543	0.0849698348732732	0.159701259072845	0.345772342858858	0.497853195758447	0.245097971161696	0.738780579874877	0.804619547192278	1.16285269745196	0.273172598900758	0.223737387246855	0.0424730158376325	0.310058316908012	0.664366103935449	0.274300968710562
2008014	1	0.491467095894363	0.302042759689974	0.273057288543968	0.155169073802731	0.227959675356962	0.0589483057210615	0.205904527555049	0.334684934465282	0.508377302879871	0.169787716917423	0.61622850706268	0.677170830834005	1.12563700789358	0.336357381940527	0.1914932351771	0.0371590235427392	0.310463940380324	0.656381522157181	0.256313272912308
2008014	2	0.503165243488236	0.291227398079987	0.259872076301324	0.133695122610357	0.202674885175569	0.0407848899238114	0.259922437743695	0.321897009656003	0.516545985980804	0.193699680491027	0.611850215908646	0.563323352507716	1.1030854198459	0.383366029123578	0.153387754229912	0.0368707886747585	0.389107904994653	0.662009130060333	0.23466333085113
2008014	3	0.46439554592875	0.277517105722128	0.244772392936359	0.10982757877304	0.16627801393451	0.0305084181066676	0.266811991945469	0.308200214656976	0.48618286063248	0.257500283170161	0.650161878003835	0.526075692716085	1.21265064912337	0.414947001978958	0.133272446986063	0.03624014290693	0.369803353258569	0.69073284102301	0.232962212779179
2008014	4	0.400703889482565	0.25698164375237	0.228395482380542	0.0865013017436965	0.125245584262744	0.0265864214083707	0.235410680663011	0.283335781658762	0.434377173992218	0.262080878968996	0.63619646931246	0.497619611459361	1.17103197343145	0.449812650541592	0.124397685986033	0.0319905848544196	0.244060537777735	0.676281040732772	0.265907841179457
2008014	5	0.384995968803339	0.24141071557255	0.210945017753818	0.0651067531454492	0.107823423204802	0.0257233852478464	0.212643774611263	0.249555069204207	0.413541069122382	0.227821103376682	0.721589475199776	0.475277560366595	0.932094248636193	0.437388292450819	0.11281717622408	0.0304354358747384	0.164676041293865	0.581566184611269	0.255906785046125
2008014	6	0.406108347920866	0.235510796720917	0.189420171991288	0.0480220088772038	0.08841477799602	0.0256740057225855	0.19968905543964	0.221414200459257	0.397392290913187	0.193838239281298	0.865349780405819	0.519227673334297	0.751276178886716	0.39802751141046	0.0971175064306866	0.0321278232110454	0.115947342208405	0.496270602893608	0.270319091229449
2008014	7	0.446778017182768	0.206951175355491	0.168094854537234	0.036975402615993	0.0739206595406456	0.0260234260906311	0.182521015234306	0.230707828330565	0.365507897328113	0.177985570636486	0.932776931081589	0.619581894477433	0.766596751087328	0.416098766114402	0.0768318681414509	0.0440363238008006	0.0892178454094753	0.451184929927355	0.312951660257584
2008014	8	0.500029248106124	0.19498197650034	0.150172479257786	0.0413922631587176	0.0980644513730888	0.0277385270420293	0.180298437396943	0.233889655555381	0.249633332907337	0.173366261967987	0.922413926595208	0.599324221418302	0.767407758971571	0.62674373092409	0.0620810602690855	0.0479788218023193	0.0818683715408217	0.393033639641146	0.239837472817932
2008014	9	0.566146533093995	0.19117904925094	0.137411431205291	0.092962652946624	0.148200219496206	0.0336351331347697	0.196276060003756	0.232067228047047	0.200871164524992	0.18258468703553	0.914564071218736	0.543917158763553	0.673088416528506	0.428645797481051	0.0526860022695191	0.0490253999963121	0.0862238684239936	0.284632305559206	0.15346202585469
2008014	10	0.610499555588078	0.194842391960054	0.125367283082842	0.11761535038898	0.172162710329745	0.106605525103425	0.193051170380942	0.223726438665839	0.192753360261894	0.188736865382142	0.954103994138301	0.557754636734469	0.558938415038542	0.344124538288317	0.048383677233618	0.0483072093178753	0.0740417619170902	0.194741154676932	0.143491670955229
2008014	11	0.643882501156158	0.182492656511072	0.120942854013103	0.117307684585079	0.183685214275438	0.149266792972929	0.174937697557045	0.215182105414607	0.229665404817906	0.224681308461011	0.999556706471768	0.638371030809023	0.519715298887784	0.411682912921545	0.0471599785139485	0.0471242293594517	0.064868645125677	0.176984583778485	0.188933868413025
2008014	12	0.700573623741421	0.162869983251106	0.130109086137476	0.125310294686203	0.17949129704031	0.16288706804457	0.169808633881087	0.197806210387218	0.337825268286057	0.303406442179113	1.01945212945771	0.637780537320881	0.504699184731917	0.351971284286765	0.047271347576899	0.044398970802235	0.0584943642157371	0.255289346097608	0.206362523101848
2008014	13	0.748191070074879	0.17966814392848	0.139473905591174	0.153019433340133	0.167971921281134	0.176712206432352	0.178107761000529	0.181877657123095	0.41995518466393	0.394662834452995	0.955315918181123	0.612545914535633	0.462768788134558	0.324658843749606	0.0451418929695766	0.0390926576103544	0.0541530296806106	0.441747860177606	0.15982376563773
2008014	14	0.859294417117642	0.22300350506744	0.171574685421732	0.167976532130533	0.157643661079555	0.18787859421353	0.180363662268269	0.16572155948849	0.438024815586852	0.429771642375811	0.818002554397309	0.563802851135686	0.463298375788817	0.302599407337497	0.0401708452249608	0.0363828097855206	0.0483819608032825	0.604234339518752	0.168950777884894
2008014	15	0.822020172203005	0.210145706773914	0.171828711596933	0.174241123298161	0.157830681275727	0.184226569500315	0.186510538648164	0.139587674367996	0.481558699717279	0.438837716553549	0.772755048644439	0.515923963818546	0.510794760631656	0.23785887605058	0.0370735792899019	0.0358030087551473	0.0434990145370834	0.653265054959047	0.154632741389476
2008014	16	0.814958068232374	0.186744104869309	0.158329957518777	0.198158355598754	0.15457766889989	0.167371057945193	0.193704085754523	0.134791900689628	0.510068229457494	0.358956376818621	0.718055859741516	0.490032441063258	0.555803936779634	0.159110841277703	0.0346786838732287	0.0344076225784272	0.0391385424469788	0.704102684227951	0.144358991134845
2008014	17	1.00369213901953	0.165901418361248	0.152235207772619	0.20575828602244	0.144855081460561	0.142689907266739	0.253434162260258	0.151579449192296	0.526348902622762	0.305159501776619	0.897513358147011	0.465208717522742	0.551018844011665	0.10876582282996	0.0329730013463119	0.0348626180763092	0.0397811108298403	0.771571143569667	0.140412355346424
2008014	18	1.06942254364677	0.152364481417688	0.154743228993536	0.190168456807801	0.160324914438329	0.124287835400809	0.312573709171984	0.175773170122749	0.538898082989221	0.287904018664845	1.20042946475626	0.432602568151337	0.551891951901856	0.134002835085172	0.0313469408987571	0.0378038854641903	0.042465064993365	0.836765382965174	0.165254040992475
2008014	19	0.996156169549362	0.146025117052098	0.158684845274951	0.175306563361094	0.191416564364783	0.120134344029575	0.245997392100549	0.213326675191889	0.536060750321841	0.298285775450732	1.29109118280742	0.417764336734176	0.678867328698906	0.145208806058692	0.0295886215625344	0.0404810995629678	0.0489833294349324	0.896716742526687	0.207471213854323
2008014	20	0.884248429095598	0.163073755894113	0.152816185552781	0.179310341096031	0.180623385513129	0.12582887400204	0.265017148692273	0.217452832878241	0.530136680102144	0.289031039484181	1.20210641343125	0.381473600355728	0.444000671828408	0.238916641890639	0.0272643589431203	0.0397391058250402	0.0509113427024488	0.94144088261476	0.241181225941981
2008014	21	0.898805831440825	0.180695802225362	0.148305251914182	0.189905499388854	0.168435787245646	0.131637506851424	0.298424322024552	0.197903412468447	0.555427394090452	0.304737991017158	1.09897908707229	0.308071989162746	0.199088833441789	0.512988875380815	0.024111580811064	0.0369664740979452	0.0531585808381134	0.938978086183949	0.296057599276185
2008014	22	0.996984897654984	0.180620689358152	0.141241898459519	0.19214543087601	0.169102756428397	0.125359394279929	0.337041247429298	0.192279497681292	0.598103424557293	0.695511985420562	0.958780970373257	0.284156100619578	0.633293099189022	0.466797306682153	0.0215053796718055	0.0338334524254199	0.0625761332137559	0.917238755713112	0.374772667088401
2008014	23	1.22001708881282	0.164342653794906	0.135481864768454	0.189606129038437	0.178705567623666	0.115953413292302	0.369953676735643	0.197829986437937	0.608917188689761	0.797955969966813	0.929099760909748	0.31672782306409	0.677377946201804	0.319640772972975	0.0202295017471875	0.0314077388143019	0.0715877667622069	0.868647570051937	0.560265675060758
2008015	0	1.2709273525889	0.144173507919754	0.127445585135399	0.169578888193969	0.184570543804511	0.108529387755855	0.451178764854131	0.200742169416382	0.568226259467071	1.03643123403241	1.01822715504505	0.290089583367472	0.656943029154338	0.168574253757494	0.0195903409624982	0.0301957599123728	0.0687932729655936	0.834843346203073	0.647250753776199
2008015	1	1.3371354141426	0.127712312344034	0.111668721055329	0.148066671216594	0.18126205256565	0.0935328802064597	0.535088785524904	0.202700496987696	0.55632043702046	0.961025743318585	1.09631749275984	0.234432738914368	0.614447288419149	0.109907386873893	0.0194707426803938	0.0292610442944001	0.0689933785086594	0.754376047536544	0.755406070549435
2008015	2	1.2011599630408	0.115091724509742	0.095823272185655	0.136046488510277	0.177736658968265	0.0695814640213999	0.509901808120001	0.199966335085669	0.552352495445838	0.683530840594838	1.11975566110024	0.186427261946297	0.429492857683646	0.218221550259598	0.0207205019685688	0.027903403188707	0.0769230201644684	0.770887491908791	0.791323915714672
2008015	3	0.816601831764188	0.115332635771841	0.0893945853978941	0.133109328163991	0.166696906918623	0.0616817253549893	0.448897671257039	0.207118098603568	0.561203418910248	0.576025423438184	1.11935781294834	0.167118143639463	0.348263651663961	0.285440465680823	0.0235082189402816	0.0263699168136443	0.0874426062910075	0.793441607042496	0.594864818842267
2008015	4	0.67083897421573	0.130092584424718	0.0963818593384278	0.12807944652525	0.15256700920254	0.0728560924698846	0.367367240734691	0.240266245522121	0.707332524735586	0.445885891844073	1.13248735460018	0.162103951502373	0.153479488330746	0.244250471882411	0.0262393132110964	0.0255791004509733	0.0912430055017454	0.92870118795103	0.287348902541592
2008015	5	0.955929289188161	0.123427341607186	0.0946301379413817	0.119095299530598	0.138826354059526	0.080368141919529	0.238273845631781	0.244404491613136	0.742512103312718	0.270552885282926	1.25362596733903	0.152532972616414	0.206912328078188	0.234107433284704	0.0276154699461349	0.025366283361237	0.0996073354440502	1.00057517358894	0.288448125913325
2008015	6	1.18274178257838	0.103668466125526	0.0883566824224174	0.108379173763464	0.133643486529503	0.0815708172440872	0.0942457120247926	0.218635103963137	0.717552058538783	0.680330918546523	1.2298848976644	0.141458449594267	0.356796577452482	0.300756636944638	0.0274256495735785	0.0251085650800849	0.0967297191843803	1.01319266044957	0.493993595372562
2008015	7	1.17239319106346	0.0969678996177401	0.0799812500040945	0.102126496326949	0.136533059342683	0.0800910159264505	0.278156971297309	0.241883825502252	0.647728203963955	0.85345326324414	1.18540966636883	0.121510421988962	0.482807747588562	0.290014159508061	0.0265283603132162	0.0250458878655761	0.0878875860964765	0.946637879603588	0.652064366953005
2008015	8	1.2731899177115	0.107708617837155	0.0765364240861459	0.105828491028153	0.137952789224949	0.0791575006711711	0.529868621193072	0.293846309632652	0.530674728614436	0.804660854316267	1.154047774037	0.104457428489675	0.649960975315991	0.193632028157142	0.0260780441902462	0.0314570643305664	0.0786395590345341	0.714264153754846	0.591699175160134
2008015	9	1.22013940972881	0.165263440269091	0.0963015731731205	0.124127503714224	0.142057108344636	0.0848854077705213	0.662070241179902	0.352632693349991	0.592488535111463	0.902095610346758	1.15715438895024	0.0931880894736537	0.541749548862311	0.0821182627547235	0.0282180984035131	0.0591757727130778	0.0703044908820337	0.618442614915675	0.347228385726147
2008015	10	0.733424175579423	0.176945460775204	0.129293172084132	0.120580505725627	0.134557593074132	0.100350756516546	0.733659330413578	0.264326271045662	0.69692256980738	0.938839824590377	1.20711310890483	0.0864255900730692	0.351572165593383	0.0817934238080403	0.0423658999091647	0.0730688241470127	0.0673060309106051	0.85050884967116	0.1351810562125
2008015	11	0.834836909592709	0.202223479089356	0.128781061621893	0.135173145186499	0.124987875580569	0.113472187431704	0.744421117354798	0.174819312049392	0.800575445858921	1.13619480708668	1.23620977235966	0.0841748316517506	0.355276009051429	0.160979972436223	0.0540233913967491	0.0723070479656386	0.0693104188604771	0.934396209401296	0.229052718063152
2008015	12	0.933711738981558	0.208782426969742	0.125092399138916	0.124074015437708	0.132520236291035	0.131082215924624	0.545677471820033	0.202626018473778	0.898205506701441	0.674813623087112	1.31212721876561	0.0904706701258522	0.40374583669076	0.233017415456062	0.0606034624965945	0.0648734009784849	0.0716650315856698	0.995597387931162	0.290948785049562
2008015	13	0.659479661217924	0.184711910197803	0.134838992571135	0.118369308893213	0.13675345707294	0.14918623807629	0.242053236079405	0.197865712313266	0.708432063830174	0.666684528920152	1.34532048950277	0.102517138298765	0.511582823082758	0.20551375232185	0.0572097119620992	0.0558796582943999	0.0703023951863408	1.01155477748514	0.266889356070341
2008015	14	0.47155384990991	0.183379978041562	0.138376454042917	0.129007926465607	0.131771424392845	0.164761607247564	0.270647635017427	0.218302267125916	0.430064963906096	0.536953030871925	1.32398187390711	0.105898621569547	0.639183471737021	0.135831632818886	0.0526473592271984	0.0498657649223628	0.0685150430855355	0.913323442662182	0.17312820055022
2008015	15	0.551720760081778	0.097246230970539	0.133911454493366	0.129003580828852	0.143483654732188	0.149762489510929	0.146349243558235	0.263865679381589	0.44534009920034	0.149367027036094	1.26835382338556	0.105289448086489	0.876528649453583	0.0441230976871966	0.0538089071866408	0.0513253891028108	0.0694928214994047	0.613817883591385	0.112638529648604
2008015	16	0.691075634696516	0.0835809745794443	0.123350391503314	0.173993174973751	0.140272930680976	0.116181813297758	0.0541700575652323	0.230485483188364	0.504309652813164	0.0830021681457151	1.21932305022715	0.11553279540023	0.300690473919086	0.0230069951851465	0.0391331761369407	0.0533054561391367	0.0731670008930893	0.638140149410279	0.0866893524604434
2008015	17	0.715771208516129	0.0953210981772198	0.117004028418888	0.189480231784469	0.150397190753103	0.085812799164433	0.0291208695040657	0.283883154095598	0.456589817422185	0.160781771958643	1.14628513911581	0.140578915065893	0.25385680090305	0.0524182611239016	0.0306416937814018	0.0559629237947839	0.10306131447243	0.708361490604702	0.0403889126130293
2008015	18	0.756953764632371	0.110642000334651	0.106278315535174	0.166761379203168	0.13940563558819	0.0774441837662746	0.0619670036260202	0.325053241576241	0.356245371430657	0.230773262223163	0.943482233717941	0.153700572459714	0.274819914070368	0.245217713986296	0.0280675407005433	0.059611997265401	0.1446914538662	0.548003696878391	0.013517124994229
2008015	19	0.868877811401402	0.10849663426056	0.091119848695203	0.118622322506181	0.121017047273502	0.077199126204807	0.066512351707609	0.346205170936205	0.39812206234661	0.799888708740169	0.905489257598599	0.167942219172002	0.209576128277874	0.381194098944549	0.0271705110116089	0.0592386523554282	0.148467998838256	0.434134347962207	0.0112879633394583
2008015	20	0.880766615652141	0.131229035792165	0.0796044448075396	0.0864147769281585	0.115445215852682	0.0623544597558559	0.0876378838001232	0.317905338146385	0.557700179549	1.19376230778086	0.904150845506597	0.188016706784758	0.227093157237325	0.2997281159321	0.0267608008438611	0.0560690850079288	0.106987965043078	0.544464430695345	0.0219184952598924
2008015	21	0.863870427629773	0.148712600304971	0.0731540437883247	0.0800827734177377	0.127691562905347	0.0573552653587994	0.133124931270455	0.256333433115688	0.644115053023112	1.04827096102709	0.946121787372262	0.204589621343704	0.183461893390479	0.126156273597377	0.0264066583930936	0.0587902704228214	0.102474891640629	0.67036414135512	0.0200794751185764
2008015	22	0.786387906922333	0.141159933590542	0.0685929487701008	0.0779642346938173	0.13948619440932	0.0644682678808946	0.144703390925676	0.227540582511184	0.78150229968184	0.926601850442059	1.02771894303454	0.219444785645258	0.0785909591986438	0.07852171833287	0.026968083394349	0.0615784103556157	0.113802198891722	0.756436652124839	0.0546099187273664
2008015	23	0.653751549841721	0.0967860287142437	0.0725326479051904	0.0786130235835757	0.154276303778433	0.0880207255280134	0.184580233330773	0.224292337724645	0.763954653077421	0.661399636779146	1.13904609953065	0.235428935379696	0.262375375978624	0.0631083114896611	0.0323386533302922	0.0626388829097756	0.120519006524598	0.778591192887495	0.177290083570839
2008016	0	0.609066210660813	0.0332368809336484	0.0807482374398456	0.0774108481950922	0.158091363796497	0.0915233047611495	0.153638857113954	0.220229805157897	0.724412807272221	0.365614377114731	1.16546834124624	0.25790825823912	0.717953384460408	0.0558983656829419	0.0429437282487945	0.0631166038228847	0.129475524135766	0.754818519109182	0.209942921629981
2008016	1	0.661323483316022	0.0102097160795144	0.0771700482377007	0.0807173325476154	0.135391544421381	0.0907136632066204	0.104641042769292	0.177016718763367	0.675990937182248	0.292831637467876	1.21620443429016	0.290406157462784	0.839862988536674	0.04752482196755	0.0566173948611971	0.0599943386116744	0.122056697659307	0.744111153265633	0.264305164952122
2008016	2	1.02786162121836	0.0091514860850448	0.071080389000381	0.0682801798438232	0.0966450939137017	0.086059589763417	0.0415205806099585	0.188411648047274	0.648231914444055	0.391835327093369	1.5039974973906	0.311535588177921	0.569203065181245	0.0364116722244327	0.0427051118717687	0.0532078912761918	0.129308141142745	0.781262973318315	0.330309296149178
2008016	3	1.15215953182231	0.00882142613137499	0.0781615034660992	0.038373261292981	0.0526187286821888	0.0775676589725145	0.0666877778781139	0.182197435684622	0.622230670543594	0.316091434823793	1.62201135380396	0.323040723546086	0.402580304601552	0.0268528477044108	0.0400190883634463	0.0501214255166399	0.143788224109834	0.806585375059288	0.264493357583124
2008016	4	1.03818239856997	0.00665744493925346	0.0790400885697207	0.0217306718387374	0.0353840432681304	0.0657282494636933	0.186027942809344	0.18047230655926	0.631221780453321	1.01944126390178	1.65185027005525	0.292808902250226	0.196256652042021	0.0213519086683637	0.0394977390817413	0.047030962686444	0.143883573781524	0.844313122617086	0.251534368051869
2008016	5	1.1410040943628	0.00575942973514715	0.0762746311897179	0.015205804707616	0.0316773512829431	0.0479942419006147	0.429851598101654	0.177331428322906	0.676674883018827	0.713691113678029	1.68763533748283	0.242564221616265	0.118104345101317	0.0175921009333306	0.038454907566574	0.0418582061563201	0.135146253349834	0.869450107620275	0.388319930662385
2008016	6	1.32631832361484	0.0102481698466137	0.0698381924289053	0.0102140961669184	0.0323554211839474	0.0234788876858378	0.333022599564896	0.173038690828651	0.749655521154291	0.696982300822209	1.71630145617393	0.232875471429616	0.0852558614387201	0.0184383137095545	0.035910164430156	0.0385524921744026	0.12400760923887	0.899626807426989	0.402650773885142
2008016	7	1.40980166536514	0.0175770056077887	0.063843107790437	0.00526049158606056	0.024058310951102	0.0076270953379356	0.253335092005157	0.197390230424398	0.738563091613661	0.905104198362475	1.77278516986907	0.238540741354546	0.18859067509431	0.0204545079043968	0.0294466812554781	0.037204704389003	0.117598741580519	0.942360709612148	0.368674609716336
2008016	8	1.60900467628195	0.0209946597857077	0.061255720239403	0.00426244361668	0.0166114806035893	0.00641604003263177	0.397633598910436	0.203973433072594	0.726967202572478	0.859598386376828	1.84076306922186	0.227323594935325	0.297956676508363	0.020298937841514	0.0247202153132504	0.0394913395744446	0.0924444450412832	0.920425417856513	0.339986182377608
2008016	9	1.67633904463623	0.0364994886051556	0.0625055428486554	0.00467858771183908	0.0149935883333797	0.00673828507738543	0.663509319034462	0.172800096284172	0.636549821420273	1.53703348691013	1.94099364793464	0.218223216183439	0.801756969311767	0.0163997690476669	0.0315766115093934	0.0482401820279386	0.0873789924474038	0.892256164467175	0.352542922659186
2008016	10	1.64102348504424	0.0913200653581803	0.0614938086760958	0.00539980907055609	0.0216473861699953	0.00470953568984761	0.937771048167657	0.14672421660248	0.591379888267452	1.63402208667302	2.03584091463461	0.204087745472185	0.659747704249677	0.00818141381666708	0.0608212254402297	0.0565914508798759	0.0808048635174739	0.765508115017331	0.418696653189514
2008016	11	1.61155901081813	0.111913308475332	0.069382639652644	0.00604973237079157	0.0306756043437515	0.00452353819289491	0.970954285981712	0.124406034238196	0.641355046313014	1.66472388379381	1.98744918291809	0.193469332793699	0.332173049897842	0.00799540579207009	0.0562429853157944	0.0523783266460608	0.0742393835599812	0.761597911612058	0.449584840654927
2008016	12	1.56609619666038	0.107630033279479	0.0897052911107079	0.00946058407316154	0.0367918589190318	0.00809600612929968	0.960385417860352	0.155797512819146	0.777989747423287	1.71911590848422	1.85086582694999	0.183806410112516	0.66067075090042	0.0606848387765203	0.0431548116253246	0.0412579381905612	0.0673813756245134	0.909358261800086	0.363029459410368
2008016	13	1.52116656180161	0.0851961579923836	0.101018699772391	0.028699233721961	0.050306534790021	0.029882951809875	1.07570284681035	0.262063238914817	0.883021927631586	1.71378680554135	1.83634132055379	0.173902990210067	0.845064785693514	0.0186002727255137	0.037373756473877	0.0319204198580718	0.0608238268496461	1.00979546821264	0.312663734067762
2008016	14	1.53424277736232	0.0725364464682866	0.100945161559722	0.054311548335074	0.0637173693389389	0.0506891691556566	1.05253527788886	0.33217685927289	0.891854066051006	1.74947491697633	1.93650336765474	0.171168543338977	0.994755175152056	0.00835873335220842	0.038437692401191	0.0298264665197398	0.0527626444702462	0.977325466783482	0.3336312452193
2008016	15	1.49664456365575	0.0647678727045509	0.086887026540103	0.0641952456229493	0.0608083599934869	0.06034167565305	0.950913616130177	0.309865291463912	0.863594579963552	1.75476380301147	1.9452259504628	0.169894192723833	0.930426240309666	0.00496424193841956	0.0401456001262372	0.0315307061622321	0.048018976036404	0.982431210169342	0.374323696788866
2008016	16	1.46324752644534	0.0567441749097004	0.0498094892213067	0.0555236654969427	0.0621161803971789	0.0543264912401455	1.0420878352532	0.223356420208116	0.881290878440178	2.0294943165955	1.95609277090761	0.168060340565212	1.17868411701037	0.00475812805470077	0.0364752606229967	0.0246094148898436	0.0402698364767355	1.01992907795732	0.404010816652539
2008016	17	1.49425842672316	0.0496935802108585	0.0220830449577781	0.0464253466379881	0.0894289208174641	0.0436746731857929	1.06369317932672	0.221968799186866	0.873886656909417	2.62291301618554	1.94979013155649	0.164283284222046	1.19103339888031	0.0140512195237967	0.0416080707999838	0.0173849952175001	0.0347667719018396	1.02502585127723	0.425702056295718
2008016	18	1.48611140853627	0.0422814765735347	0.0201955066812124	0.0417028372881356	0.103666288255045	0.0326744512002525	1.07194009097892	0.223301185362627	0.914583193755044	2.2998996511762	1.91329136132809	0.161687437329408	0.756417834036483	0.0287836751077568	0.0476368674120881	0.0125715453966185	0.0316111611600374	1.03899140836889	0.414339740435225
2008016	19	1.60319376144375	0.0379432829194278	0.0226499898705665	0.0407210362834476	0.102266974813287	0.0256001386788288	1.44171719977212	0.159689562614463	1.14746210221498	0.902971401411769	1.88390783152312	0.158451743911578	0.334683006210537	0.0491359073012957	0.0551283226513702	0.00984533175096593	0.0339260329704843	1.23609308626252	0.424005687964211
2008016	20	1.96498168784674	0.0453330451701095	0.0231692672847798	0.0462933491550693	0.0724119249327524	0.0209396382673028	1.53005873150296	0.14219816258834	1.25874132756696	0.729021282445861	1.84371906420574	0.158580890132693	0.066280203525382	0.0610069516641535	0.0625146288139009	0.00817797060038703	0.0302574832705974	1.41586436920236	0.423466668723428
2008016	21	2.34046307790951	0.0628379200733752	0.0563758128652542	0.057669039722279	0.0548566762698077	0.0193733260272699	0.781958531134118	0.185025920349717	1.39142217407937	1.41970164031739	1.69745621895209	0.153072984725773	0.0843094519895668	0.0592976352283818	0.0679146118226448	0.00698451788296665	0.0292777643978547	1.76891173586799	0.401771036583556
2008016	22	2.4702746765787	0.0973496420912741	0.0576924056046638	0.0642974237375289	0.04878584514021	0.0200229132119613	0.667375782374003	0.247178649407369	1.76408991861095	2.10534865542618	1.4909237278975	0.150962019394424	0.0505435692125653	0.100375240191316	0.0709694170987114	0.00681818454707406	0.030624120965352	1.89343294027733	0.356241355461236
2008016	23	2.34789370210784	0.156006782359519	0.0201414959036032	0.0669659094284781	0.0417792846799345	0.0199783862974119	1.2391812108898	0.249115597251159	1.83492047580594	1.61806323191763	1.43877758320366	0.160942793562317	0.0812105762599752	0.122579263439115	0.0742614027982677	0.00913973833592299	0.0317715071763486	1.41465023440829	0.299326762289715
2008017	0	2.06080803619013	0.166402681517047	0.0372784400542311	0.0719511255859586	0.0419440063352225	0.0197032344851445	1.29078150543764	0.177504756692052	1.68480129692954	1.63425184376221	1.68876998637584	0.164098887487761	0.190190800167285	0.168795942547263	0.0759500864192436	0.0181256862368743	0.0352738014623788	1.34139978692979	0.244096576642923
2008017	1	1.91068436165028	0.151577215458574	0.14927542659404	0.0804129020593376	0.0460882127853907	0.0201064673791352	1.06479189936567	0.192550441400672	1.6863530012949	1.78684187978881	1.67501555104974	0.174318074866542	0.304575989281287	0.241404461697062	0.0752678692023426	0.0295366191908426	0.0399055056580334	1.6034667550155	0.193240546044981
2008017	2	1.85804324418993	0.129634678355959	0.249472438987609	0.0789062135773671	0.0520213095082974	0.0227102904598499	1.23234985655948	0.348892181171207	1.35741190281051	1.77027699730061	1.45686661762196	0.182208999763275	0.295801035665171	0.262237530087677	0.0731390818824906	0.0367924473111753	0.0433533468154637	1.34242618451979	0.166033620893635
2008017	3	1.86001947039761	0.0977266049044442	0.275553895688005	0.0551834313997699	0.0653332494382763	0.0265814508157247	1.29811619723766	0.598258721071724	1.14854522874384	1.67301533590972	1.18404576469638	0.185612856359367	0.244440325945028	0.249733882454816	0.0741797039741032	0.0404078704648241	0.0483583164530726	1.23365284785767	0.16317899864732
2008017	4	1.78975663828502	0.0577349077019455	0.245085202835923	0.0391403398186721	0.0989226096701101	0.0286672739961139	1.26115173467036	0.840264831741429	1.18564380039606	1.54494062417533	0.910803081187253	0.174510076823325	0.355616910726237	0.22403138717052	0.0762430682261804	0.0409790835466459	0.0595076132796632	1.20104462095406	0.214309461568807
2008017	5	1.71463280543709	0.0313706163433062	0.201028596964733	0.021309975924682	0.138021816502963	0.0290948730987168	1.1932219174551	0.912118747917998	1.25704012958857	1.40435605606227	0.860260531257446	0.159721776070798	0.492473912228384	0.209251475724967	0.0716625691647594	0.0407277314678766	0.0721258716014719	1.36381526298903	0.218099829777182
2008017	6	1.64192906320251	0.0308529833763774	0.0999975692541685	0.0169730180374946	0.156319365324297	0.0284303311226165	1.1099130618334	0.878657064627994	1.28243970057145	1.26381805138276	0.939506821351276	0.173960635805312	0.688054863730398	0.199776723618378	0.0621036461337204	0.0405011152263578	0.0730371859910722	1.51635641710651	0.184137269455449
2008017	7	1.61657712564373	0.0343184642334334	0.0420792396003697	0.0162199716370051	0.158934175902147	0.0278087162660581	1.0192224731189	0.831328449493997	1.207202901228	1.32470669487371	1.01595374333753	0.194014203477408	0.783782109458097	0.188936922758752	0.0585327681538426	0.0399148944854231	0.0640234942732398	1.47974199753028	0.155290115405984
2008017	8	1.58599978272922	0.0353092274960514	0.0635514554466205	0.0172519854818953	0.129712292166283	0.0279659904898751	0.911769103485395	0.667428912681776	1.10286197380973	1.55544344630711	1.0838803175434	0.195588021263248	0.782919947909358	0.178307923213061	0.0569326243912377	0.0395256563774359	0.0559299592655492	1.46131046324661	0.128070486289833
2008017	9	1.4844069450047	0.0406557571881821	0.086622726319085	0.0205200297394497	0.0907412513493928	0.0367179791364751	0.906947893849981	0.504624304884102	0.985754282089476	1.2724171139454	1.1309723177265	0.196154910123658	0.723705457757804	0.177140640318594	0.0539801358937937	0.0396600597414778	0.0591459509714818	1.31211891961259	0.1101243297702
2008017	10	1.4170849634918	0.0520866304036371	0.093173380397534	0.023778193394943	0.0549724029738699	0.0382855062886631	0.98501936787122	0.371870840314131	0.921636087882999	1.13155665983746	1.12848586429919	0.195429774986005	0.703100585485794	0.165256037263779	0.0493708628818575	0.0407452072883979	0.0703394592860198	1.04645894315125	0.232113422023884
2008017	11	1.37567249537468	0.0547799823373506	0.122892642542696	0.0255998427934798	0.0334092723680115	0.027585614747436	0.961578488743723	0.30341151756626	0.89623212773192	1.15724351666313	1.09098318602113	0.190468329865809	0.731491550082463	0.152174179407516	0.045274946238506	0.037427403235597	0.0821084931116226	0.948214452861161	0.374206853879176
2008017	12	1.31453718331902	0.0714725502270191	0.17309756810024	0.0274748741793167	0.0211626415458653	0.0175541281444411	1.05779147093551	0.273848695126398	0.918018795481011	1.23489737404103	1.04982244692824	0.187962388953556	0.757590789435857	0.141088137052135	0.0422157064220383	0.0312591104956207	0.088736301549791	0.887858950469034	0.434040271219446
2008017	13	0.857401654402341	0.146883554275921	0.211017767284134	0.0287152209499939	0.0193249462622475	0.0150221644033455	1.07854433133653	0.201760004844322	0.928063336329531	1.18614225863504	0.993670008070115	0.190248097669331	0.705455592256268	0.131610994790054	0.0399234082801076	0.0278273649474927	0.0938621759132877	0.883098202033886	0.592379268491452
2008017	14	0.324307603707947	0.360256618536039	0.25064438786576	0.0268607783492001	0.0176597915655662	0.0464377598455153	1.03345968624478	0.0781671256854391	0.97545449006147	1.10942530873346	0.896483687607703	0.200283081003484	0.853369149806837	0.127577246008351	0.0386706380926453	0.0279716785739216	0.1106371197912	0.897503302629285	0.402430601581516
2008017	15	0.374123932932879	0.33973999653265	0.428624360333939	0.0235480496344052	0.0218756889260876	0.191552403494553	0.964295448399749	0.0496943865493889	1.01249826228158	1.04423407318137	0.772830651539411	0.206049734172944	1.1067675455676	0.123686300329283	0.037292929187264	0.0279462985482808	0.0893422630514692	0.860750432020639	0.380191973950458
2008017	16	0.489662920552713	0.208124107791104	0.571588771067419	0.0228004194872082	0.0287206187734308	0.255132528592404	0.853377290680559	0.268698030733296	0.991368561877389	0.877603508570673	0.708577762780044	0.208751538794692	1.27621190313167	0.12580008731307	0.0342610099534457	0.0236282603708773	0.050887298743168	0.872485873715356	0.0584791833695529
2008017	17	0.49907750254362	0.19682696132513	0.518316553531934	0.138887496621851	0.0316709431535934	0.244871630886862	0.593055826461896	0.342886655615224	0.90934302573151	0.555805990869446	0.65835928244151	0.19560121998052	1.35723421419229	0.133097417291546	0.0313412746704434	0.020221632183455	0.0359810612958769	0.956229419154339	0.0944288954437044
2008017	18	0.517560750014396	0.227626419549019	0.503748774279277	0.294316557875562	0.0463038446336879	0.212806384655905	0.120946207631191	0.265896221300345	0.549003962666083	0.167199152217152	0.671201340582736	0.171383507442529	1.40068295314245	0.141995311068977	0.0308382259929523	0.0172667254876811	0.0323018088983544	0.950694955570013	0.510101100095942
2008017	19	0.617589409526029	0.235177656137886	0.544443142219692	0.242542858632314	0.127166395030556	0.147241528650786	0.0842146205419265	0.126888664646676	0.0996313877829275	0.127238171284162	0.666923873007196	0.148549075759765	1.46234940792597	0.148439531548024	0.0332584468898801	0.0165532122629533	0.0298556803856799	0.849492217160838	0.763242188123872
2008017	20	0.50931576135171	0.202240016815623	0.401523332604446	0.214493717880715	0.233585919342995	0.0518742544473835	0.1907713158938	0.0906658968031464	0.0934644015519915	0.205349090082097	0.634844097233347	0.131347673131685	1.43765150123642	0.156998845692294	0.03557245695572	0.0161234896484162	0.0261448589474162	0.447060212724464	0.629187929068037
2008017	21	0.310764186328488	0.0521180039865969	0.188487794894285	0.194763960561441	0.191399269769888	0.0461987880632901	0.178104672900858	0.143100440178654	0.321253998117363	0.170818040913363	0.575987419080137	0.122071345686614	1.2976126446722	0.176827385424478	0.0371188618733959	0.0138190917388699	0.0254346067311135	0.0779957949226456	0.400310940040686
2008017	22	0.300555346188716	0.0590975359839657	0.0806292024547935	0.117826457046788	0.19642808980001	0.0687607719304703	0.0841652919068852	0.202246748507296	0.318591962198264	0.119313245357231	0.534540235289527	0.113253445301589	1.10645945036026	0.21895412564958	0.0382758209981624	0.0126191848942301	0.0189234815994554	0.187099334755205	0.674634555122094
2008017	23	0.259712274585038	0.0721730926295276	0.0489128177372192	0.0485693459488358	0.204664143760815	0.0948313203700654	0.0919592856572524	0.167059301471157	0.249581313487695	0.11032109455629	0.541584646333173	0.0971920949204402	0.868030021605801	0.22902203255675	0.0390295616091521	0.0143743871084854	0.0166918820817294	0.336819938255992	0.681378388952341
2008018	0	0.695519978921581	0.0532290046751695	0.0444972670960157	0.040880112052363	0.17555020651523	0.11740587430171	0.172973047095132	0.0455482262011429	0.125547671934014	0.0799747446156888	0.577313356147427	0.0766352989043032	0.50874555646228	0.233461281015179	0.0388671013700426	0.0184258763639041	0.024886818027687	0.311049324316885	0.6387590549007
2008018	1	1.11969832576354	0.135171324954338	0.0467494045997115	0.0529212392877709	0.0702326065163189	0.15793316283515	0.145066407684249	0.0294703911237821	0.0917993576677613	0.0614671081005096	0.565380845348286	0.0644569285006387	0.328170550408524	0.226985226911236	0.0378556121931735	0.0229129522689605	0.0590403782553611	0.157665580542357	0.581280896800925
2008018	2	1.12956380752059	0.0809967021314624	0.0497241071548696	0.0782396916202751	0.0285213027668217	0.106431962023265	0.0707119940477714	0.0205043180593264	0.114633602942806	0.0398749709440566	0.504977285914465	0.0533632675632105	0.278401889803638	0.223835284205346	0.0363105234837863	0.0255067594904081	0.11912593217951	0.0514026417532726	0.60383715465462
2008018	3	1.01637955480821	0.00938889795883134	0.0972455986114225	0.1012471018352	0.0180027610917922	0.0569952091434754	0.0290014085170515	0.100176782982835	0.139622187342305	0.0210360738171829	0.486888247303404	0.0385067419914588	0.282758534904151	0.225327910695867	0.0347619701696475	0.0233284674303127	0.124668293676455	0.0758185874997599	0.484533465472673
2008018	4	0.830454889633323	0.0961293618587315	0.179346614557897	0.066591440894794	0.0255455899967538	0.0246815624136064	0.00855193719187164	0.372091532201087	0.135642339397402	0.0255967056182593	0.523135086128969	0.0349893580303029	0.338311868527612	0.225667250018037	0.0335186653426686	0.0223710972671426	0.0785791494867339	0.108838053941266	0.359681384027758
2008018	5	0.664835189824046	0.24811351385456	0.23590464845772	0.0280191208871629	0.106194445782265	0.0221102323376399	0.008153727874383	0.447340511808382	0.0977991771881119	0.139642105945243	0.530726657174991	0.0355802706977172	0.439311375695645	0.22129921637185	0.0326772839270837	0.0511556917170074	0.0721122452396206	0.108498745201025	0.350027933528957
2008018	6	0.674684127348592	0.0916580559633862	0.206852378306608	0.00644667947994982	0.179217568102179	0.0642945401678991	0.0276979299376213	0.116792767416973	0.0270437079654253	0.670105256594566	0.53485111187259	0.031619330772843	0.579966524889223	0.218488135812744	0.033660770016685	0.032522912669254	0.0625325477378901	0.102890291880205	0.423375405465555
2008018	7	0.876160567532311	0.0383408736967129	0.243455190620222	0.0319951100122103	0.0975556818554766	0.0783768832347409	0.274487160607386	0.0655141300534485	0.0117457133369818	0.791921683037793	0.541351760571678	0.0262387938912055	0.747100356934211	0.237363797351425	0.034288355779487	0.0423438800251074	0.0526405351759504	0.0852357256591273	0.503099756469121
2008018	8	1.09871049171803	0.198861244307166	0.23258965627565	0.0657958883330575	0.0372480754776303	0.0672256128180734	0.623123468037538	0.16633550973019	0.0109538598339518	0.842771465285801	0.549686697227031	0.0325392073324538	0.858731908140283	0.250661548850468	0.0324362116662722	0.047091080768442	0.0516977593847772	0.0583116013388211	0.574467524754634
2008018	9	1.2165997432679	0.284539484160728	0.188817444826413	0.0484859210530902	0.0399739264453442	0.0351759023638498	0.656150834155112	0.494073615502261	0.0115766327116122	1.08860819624497	0.564119861949055	0.0351390751307944	0.881834150719606	0.248440920560269	0.0293568926542189	0.0390417335428344	0.0553423491055767	0.030676027860408	0.6715005813269
2008018	10	1.46861698452715	0.237847795860314	0.207013053517796	0.0246384990193019	0.0469629075307042	0.0241255936190227	0.67441459415938	0.571016901268455	0.0360905889362297	1.27171958466084	0.567714647909272	0.0324161652118239	0.877586796140878	0.279556966082372	0.0261493185788183	0.0682681361310657	0.0629854621511168	0.0155306044125979	0.580450447388877
2008018	11	1.80698965586561	0.201363954359597	0.288123927002255	0.0949079533782052	0.0543584206414186	0.103534133918766	0.872067994738589	0.602490499523896	0.290519509468855	1.51110915643649	0.548896246628454	0.034311878033183	0.856910722040263	0.322384663322363	0.0235179832963345	0.0575006094858974	0.0629497110898595	0.0102693348493275	0.481279018695821
2008018	12	1.94269505080465	0.223324285146195	0.456343789604686	0.188879590656962	0.138331450685596	0.114654017858061	1.06195915409116	0.790854405899862	0.702023241448078	1.58465286420951	0.502760484802975	0.0333654959954538	0.824577405371307	0.374817749742753	0.0211069407133219	0.0349239938338872	0.051541529654723	0.00989122213036966	0.383729211397706
2008018	13	1.983069901909	0.238721740733452	0.575056557351781	0.261339187897778	0.360816651486514	0.0578150901832344	1.23931324493491	0.866097545757835	0.783491041160872	1.83158567378906	0.488802399141133	0.0317072860804538	0.759991250175193	0.385096607592465	0.0190643373619787	0.0216422962822937	0.0350618036924791	0.060618033258598	0.311786985884093
2008018	14	1.888016613151	0.307691432061301	0.574341363599086	0.269679062391146	0.526863908383347	0.0362998333973917	1.35358170897259	1.03409545034432	0.793718171149418	1.84846343198767	0.428664077657862	0.0290019189546429	0.574108367962136	0.368937823137054	0.0172899229645635	0.0143941616843524	0.0212841543597037	0.488172677851649	0.230759304581453
2008018	15	1.75319296731018	0.389224761187531	0.523076695067721	0.214286425677871	0.716329227507576	0.0597810448002377	1.43488036130054	1.16139919019946	0.864980228858515	1.56564479213637	0.369550323110778	0.0268338604259849	0.346846191827892	0.327553388207523	0.0161934853679615	0.0116548320889396	0.016673872494107	0.795621124105622	0.19571732357819
2008018	16	1.38085999480909	0.296793548343246	0.482935783429084	0.167322994476259	0.792893720751141	0.0821319499624837	1.18312414122476	1.33672913798615	1.05405401676608	1.29653820956192	0.33833580064871	0.0258490725452933	0.237129734092347	0.256867937052713	0.0160340879534232	0.0133608811203916	0.020651820416433	0.85839713918428	0.0656992751203478
2008018	17	1.31804274042719	0.231644457502885	0.528012441254994	0.174709646037414	0.807879134454383	0.0868862809335528	0.937960580929955	1.25375433739281	1.07592524843222	1.27252004886591	0.402780414401726	0.0257978630490465	0.230630959829096	0.172413034248914	0.0151112138494721	0.0159390107154517	0.0326635920107061	1.1371887151359	0.0954660543176069
2008018	18	1.22740814641165	0.185998239421532	0.67053740528297	0.245396944508704	0.967614968000887	0.0717208920849185	0.963421167592849	0.889721651912668	1.10094217420133	1.17709549240222	0.367037164545361	0.0270148249154735	0.356528167839611	0.105159525740459	0.0132166351611764	0.0178931024623068	0.0486203066188612	1.3526409739134	0.688091650244637
2008018	19	0.828731134417074	0.15006918474469	0.782482966025601	0.169917993198392	0.741754579727954	0.076625851504893	0.804473726537053	0.569006455234905	0.963193280745778	0.860782626118448	0.391548405769215	0.0310330606087578	0.561380696115082	0.0872826687078332	0.0115584829258463	0.0197078019199819	0.182292932753603	1.49096564430975	1.01496371160471
2008018	20	0.943460433907141	0.105407903511638	0.792156719354754	0.126112432918382	0.357255430590302	0.0643424614250038	0.512306966772063	0.289026708357687	0.961439289143448	0.438140765094389	0.619356090076588	0.0340800840005697	0.522801327405285	0.0728143431435769	0.0105747786668389	0.0224882127037303	0.390920825973633	1.07658457418574	1.26434308847164
2008018	21	1.15185325153501	0.142762948425082	0.769060390150232	0.115654737601302	0.204653277818013	0.0537417059175342	0.271666311542813	0.208673347448074	0.943204489709789	0.218400887637347	0.561512868812751	0.0333183356974877	0.410014314822198	0.0409647051528898	0.0109879727247186	0.0268229199724546	0.387590911066095	0.944943241048262	1.34555236198043
2008018	22	1.18705301488027	0.0629175895208868	0.734285276083208	0.0935846497634964	0.14508188068601	0.158714347572903	0.0951264218235896	0.173225834408597	0.804727884619116	0.368085717649215	0.406658697453	0.032581489630377	0.436347412651228	0.0833974184239565	0.0122936174490972	0.0325980858149353	0.356453127378795	0.802933720137314	1.14216041269167
2008018	23	1.08548370907354	0.175371879104552	0.664992724864737	0.103238671610411	0.0809488006885792	0.504250673237148	0.186807285004069	0.251631986752853	0.517340226572273	0.418607203317529	0.591760397835785	0.039197369729264	0.272723234118911	0.0890296029270455	0.0126809885925037	0.0389822066306223	0.282906262427814	0.74564843010043	1.09406056075466
2008019	0	2.00786406796454	0.337344825749453	0.60687127995767	0.0572384035220366	0.0709457329971326	0.436808105726984	0.187692996115712	0.323174516351864	0.667574549724608	0.386768657900512	0.650275720089431	0.0675069066661995	0.0708311747210113	0.398186714109397	0.010769664838135	0.0459966550136021	0.199558426431944	0.518503422528425	1.07788860794887
2008019	1	2.81040503710496	0.47179726757262	0.547370782729334	0.127396989866398	0.121479277558133	0.359239092928653	0.0976249939997043	0.457586076497336	0.844315723997127	1.30621543289719	0.842434315552199	0.0956214061736992	0.128566564940211	0.398262077670311	0.0091820126085029	0.0584976744768713	0.151550337718456	0.78734189565957	0.870635845191231
2008019	2	6.36482034164709	0.653637747323753	0.379643828184695	0.242897150483381	0.173029050914942	0.514814009386994	0.232675500893017	0.526967305310777	1.95179115285032	1.17203017154353	1.1130494855767	0.101390820368687	0.305125959225609	0.29306205951843	0.00930736280484265	0.0842582425022834	0.153138847292343	1.00037729079208	0.724496020699164
2008019	3	6.66649651493374	0.315286193482334	0.342634381663429	0.366041759900906	0.232709782716246	0.690806496032157	0.477391064610343	0.950325927803019	2.6250378258012	1.1643180892335	1.26690442316099	0.130727017826929	0.38085675551702	0.158121342719897	0.0109033738781738	0.0755521644279815	0.146864732104899	1.72321348268086	0.702528471746533
2008019	4	4.33456260134328	0.344334922372665	0.572710784788377	0.324047929747494	0.366109372743087	0.753845981787085	0.877239803524944	0.786715789179498	2.31922804243125	1.28514461366896	1.34139938888353	0.145954934296584	0.472681647333581	0.0825446616286537	0.0127748759457465	0.0333342874359247	0.108150952532422	2.42029402239958	0.68481927321129
2008019	5	4.53291967556933	0.244795541623409	0.502266899415448	0.183296162328335	0.614294972787129	0.625874204481232	0.972588562428869	1.05803708833419	2.40825417173123	2.40890263296857	1.36469184325841	0.144440021918075	0.22152617085404	0.0470249940957366	0.0153318084003229	0.0282143498057221	0.0932025749988569	2.70411569988997	0.654126562825014
2008019	6	2.54112202490616	0.113200194444272	0.462185339924989	0.173980730110805	1.20757523533384	0.394484772665317	1.85379879163295	1.62412918084394	2.05892447295986	2.44976215601431	1.46821435822394	0.154132994462847	0.338999481945056	0.0442153335656365	0.0157644766007329	0.0441360375723954	0.182984795049217	2.28631689559169	0.575056638253595
2008019	7	2.83766969343948	0.032204039839005	0.479913442867923	0.0545519429865302	1.57382134924753	0.266234804755553	1.97609986913955	1.61756461314695	2.13285033746513	2.41478227151135	1.15533705088107	0.165650315181161	0.433196836445422	0.0311565251815787	0.0212806011565073	0.0323495934109395	0.179158131813437	2.36122243289652	0.51681478563665
2008019	8	2.61909095421584	0.0165418253250796	0.456157228990628	0.030046099440282	2.22523642243853	0.182736334304788	1.98562068882996	1.7444087861982	2.41496172223528	2.51761462456076	0.927870210756775	0.186237886744918	0.256169716699351	0.0308688830516945	0.0655189514789551	0.00285984643896417	0.306211333735028	1.84402426823695	0.452938854614753
2008019	9	2.08615816374966	0.0162953498355113	0.393373378142917	0.05534926564924	1.62218587397391	0.101434650555578	2.17427811200308	1.97103755276056	2.55480835069585	2.3926315577403	0.733047499136421	0.199864301830159	0.449601259148108	0.0753098414613358	0.125853929161895	0.0117079097733505	1.51298030830077	1.6414616160196	0.327660064639238
2008019	10	1.77242341832421	0.0624139326993122	0.282666914134125	0.330119203042104	1.70853213765209	0.0488750162450058	2.0476945430092	1.79389898934008	2.8270522585459	2.24818281180514	0.793362377746914	0.207499018763978	0.476942687022497	0.150031153642945	0.10633761248747	0.133111863872051	2.3517410306621	1.50906030160394	0.232973741953469
2008019	11	1.59336404151995	0.203877991258733	0.210898108731215	0.560730034834671	1.69211789821872	0.0297880631444312	2.11766220421692	1.48979296397987	2.69820619941803	2.63719050465757	0.558593129069743	0.230533042306078	0.53146916312588	0.317943435139078	0.0658984644813678	0.227312300879902	2.16462555179922	1.58159107398659	0.140510809432065
2008019	12	1.54226432507243	0.393907618846476	0.1998131830752	0.601251102571451	1.40384804332979	0.0205564578523879	2.27826001022626	1.26529826843697	2.168636298717	2.68445908052053	0.790947409449384	0.21696050664053	0.765552236447145	0.279356454742685	0.0373113023355843	0.142503865340241	1.62457418601784	1.47330321011988	0.082777225516373
2008019	13	1.68706086352584	0.505993344363585	0.194848748348152	0.518933433386899	1.16802226554242	0.0117567920379792	2.35124464068754	1.12164076111952	1.65344387160052	2.9818632225401	1.19721715969964	0.245729446280155	0.860290850627361	0.384811185895295	0.0329272553170117	0.0577698055649151	1.58575026581297	1.28787101820435	0.0702918446540837
2008019	14	1.84946787445818	0.514461923723475	0.201110583739863	0.560557057249746	1.0254224658454	0.00570535165278348	2.420020125298	1.28677605339507	1.63243866293456	3.04864681078559	1.01331599274345	0.240957868305454	0.615483572190381	0.519886364879703	0.0204996781346291	0.0273131256894622	1.53038922871393	1.41437475079091	0.148568481451432
2008019	15	1.75204827299429	0.591438985484342	0.238031698869038	0.585694420564363	1.17667304722383	0.00140084095678438	2.38725193262309	1.47435056715782	1.84769931576466	2.81986689766583	0.849048306222964	0.22790373437123	0.59698327445743	0.461675938113935	0.0225742018409248	0.0125488748505401	1.48472450194289	1.59267937946944	0.339895735155581
2008019	16	1.98825225136277	0.623095193281679	0.328537616836783	0.537501706583006	1.40436423935717	0.00402487018255858	2.55566198264127	1.58139823574585	1.87077982676757	2.90913172310632	0.608582894926892	0.218033563876432	0.715263832131257	0.481780960974226	0.0367325254148938	0.00801634773424693	1.75305327689468	1.4971549776676	0.480856417821677
2008019	17	2.36775542182154	0.586512409542475	0.427448896382321	0.470146857584085	1.48230327842929	0.0441703371395868	2.63039024335505	1.60573606548212	2.29217659736897	2.71001575492375	0.363217988372338	0.273160012584545	0.452860579635888	0.40523742637957	0.0501462662003597	0.00868532441196252	1.83962914593044	1.2652433654897	0.52579333965654
2008019	18	2.55792777223986	0.52083317907116	0.466850875427585	0.414212071580042	1.5282196026905	0.161253972713406	2.32855998823268	1.61832808259061	3.10980876999764	1.67243375557779	0.524084923545744	0.391166835546097	0.771981594917774	0.412149441267528	0.0539155922262451	0.00781232028148219	1.86781577668462	1.69049271203977	0.517033585570028
2008019	19	2.30986233091213	0.478831794518402	0.461494129682895	0.444142272989395	1.62337229952752	0.253222519913386	1.38117119827895	1.79100477995357	2.81372751935877	1.4726194216556	0.682390291006839	0.663203591263172	0.96847348678176	0.459094661220036	0.0404821607934414	0.00587129818956305	1.74810242046436	0.747388691709129	0.486472771698749
2008019	20	1.99784157533997	0.474247882571666	0.396406902538239	0.502963417358382	1.61019189873414	0.274078287597485	1.21981195335045	1.94835552698144	1.71559252262853	1.53023748393933	0.77385749577371	0.704887576104168	0.496552697696854	0.413917194699997	0.0200618918545865	0.00291572593900975	1.77197815967797	0.655504767709157	0.474490561408699
2008019	21	2.01376308057648	0.481754850808404	0.344377451499716	0.478025921514179	1.60759340626129	0.267995437882774	1.04536499006713	1.89197074233515	1.07313917515116	1.21427205653064	0.626642320317961	0.578346083994206	0.262216882137292	0.674347306102136	0.0210512222648662	0.00116216628840255	1.7852239028512	1.12959905404114	0.437127772813033
2008019	22	2.08279237557841	0.481571015043067	0.293473382957134	0.461107911938384	1.67113844994813	0.256462022845917	0.964680764879092	1.63815615294766	1.20627838852327	1.36872758922753	0.681804072446428	0.519473293349222	0.462457413340341	0.734881720546061	0.211279631594443	0.000449977156347131	1.88014017413291	1.76242740406101	0.379207179144009
2008019	23	2.05515191968235	0.487325529317779	0.247710099471123	0.437648947745865	1.57117713041264	0.261522659423414	1.5063114326357	1.48351879441027	2.39786737371215	1.72943484730709	0.730144120818628	0.368583165475227	0.513946605654849	0.643867939340542	0.238774320761315	0.000484023782030728	2.11419551027064	1.2204072857358	0.256029859197855
2008020	0	2.01795979222586	0.492683414106001	0.210962179709625	0.400251025829555	1.35277469058959	0.273534073073912	1.93050309053316	1.46027275548076	2.20117452483798	1.99756780723655	0.792436065400009	0.438502779486846	0.40853076860284	0.462031131242092	0.250015832624939	0.00139331969165394	2.23116759595351	0.952595430977827	0.0408840007291499
2008020	1	1.91944432789656	0.496221266407771	0.197734754055766	0.388784071953465	1.23515360466769	0.278822910571532	1.86586843617139	1.43955176163519	1.88333995872186	2.09318267407222	0.84915362014847	0.376351334310122	0.539166646069808	0.387416371384859	0.292841432161792	0.00428500564708457	2.04422103886688	0.956511841374514	0.00205018921097682
2008020	2	1.85213154808133	0.501060701421575	0.214512535395721	0.40721727379773	1.1996032469555	0.271950125003943	1.72918538785601	1.36896817864197	1.7732483682097	2.12813206465576	0.836747127709744	0.213356077178776	0.903093286053261	0.296732774514706	0.32953237528355	0.00934452789108941	1.50973461757531	0.953533064942326	0.09615759837629
2008020	3	1.86228898609419	0.512875171964267	0.24726631218863	0.454918617584118	1.14255697255228	0.261291402653541	1.62942244425894	1.33426828796513	1.85638249110119	1.92946664485568	0.798808542593389	0.0635419937925975	1.21153105999057	0.242999457222506	0.307343326723903	0.0160443646853437	1.2849943987489	1.03624543512461	0.522158613905937
2008020	4	1.87178028955624	0.51771290192031	0.29725551804593	0.465479801169429	1.09829938519059	0.246331823630551	1.58134553951734	1.35532783568727	2.03699284191043	1.50046287929425	0.784077906145464	0.0274586651771678	1.75290651122625	0.224157057683268	0.261773126045975	0.0228610104831191	1.35110633975501	1.7025396384518	0.649236640981436
2008020	5	1.79781484773547	0.505818311114966	0.333358749734643	0.452685767394946	1.08247925677049	0.217861927025842	1.57002897400024	1.39117534485168	2.16752752886589	0.981694426651707	0.837081568898904	0.0236351679606067	1.71831085248207	0.222428387061757	0.20878620880515	0.0298933838235228	1.4713351375113	2.3669250000867	0.547120174436594
2008020	6	1.59186605301882	0.514698507148543	0.322929009751802	0.441814864374557	1.09611197981092	0.107683666192842	1.3924977764502	1.41072145668962	2.1138516365131	1.17497484239808	0.924408974239553	0.0221901988074853	1.48623831777991	0.236428264929917	0.167533727510764	0.0359924741975198	1.50175545164218	2.32730029541233	0.657864401272535
2008020	7	1.27588378184465	0.338141123815065	0.318879226471483	0.411550275338538	1.11558327124083	0.0697491495641775	1.12958999459547	1.38313767398761	2.0487618929483	1.69006964651329	1.12906221109617	0.0205015499275024	1.3060677793213	0.235377654662464	0.145712571031813	0.0354784131459739	1.45966889660963	2.18738366918674	0.687622804802901
2008020	8	1.04100430067491	0.119191711522194	0.403903173286251	0.394826254949749	1.09969376011118	0.0626838752149039	1.17741649607923	1.21310772259895	2.17469497484082	1.71512167389418	1.1367895412354	0.018885815599335	1.30850203618631	0.241345637075424	0.145356845689148	0.00897379626815556	1.42774872417787	2.06666488673965	0.618133999175439
2008020	9	0.914026775913708	0.0304215397824078	0.496750986541874	0.405447488724475	1.00382251717134	0.00765402832107264	1.45490871154677	0.972148783995804	1.79540535722836	1.6222177785107	0.916208296394469	0.0221360211228176	1.54276796787683	0.335733521172529	0.15401756347429	0.00126369889362652	1.3816847378053	2.07597390716489	0.458564827402362
2008020	10	0.853053641048721	0.00462274702423718	0.551030711027509	0.451450716240779	0.90148634792222	0.00224155245692467	1.46405726352986	0.827572106842036	1.07236162616729	1.53875989484773	0.830049708866267	0.0515007063799789	1.53862601184282	0.533885743562059	0.18698323252956	0.000640146702077011	1.29150084252612	1.46987111979536	0.430281259040603
2008020	11	0.777106804595103	0.000773288959577111	0.542013744614741	0.458123419951041	0.821047555252242	0.0193507254535688	1.45764274775239	0.807754393132101	1.17770451200406	1.46498102129301	0.874688913590491	0.0726091490814289	1.58926587956196	0.964387940890484	0.215039893239863	0.000286220307501585	1.16001634414683	1.23339449901587	0.410733746753644
2008020	12	0.694325571408602	0.000413224921748681	0.550219931152234	0.423580865305771	0.779427059270377	0.0433091867269139	1.41309061048273	0.8466273504911	1.59712687245018	1.37381648663312	0.92066610741495	0.0649349176720947	1.51202625993929	1.13290894246031	0.213607460259281	0.00385203966145634	0.970021586896556	1.26653560181112	0.389292845510749
2008020	13	0.631500469983023	0.000343668302457855	0.553042639145502	0.352608290630967	0.727766475981169	0.0594115195085171	1.29444140820146	1.07903209236287	1.5684251117164	1.26524764197918	1.09757644283133	0.0589664352982702	1.07312179782841	1.09803949125303	0.201966353085048	0.0461059684414603	0.839460536879033	1.44095896244929	0.393536792732277
2008020	14	0.54294570144821	0.000312503527349518	0.614380194631268	0.285991327930778	0.98565221484155	0.0578044444083075	1.11907307262564	1.16976442209781	1.45261296206327	1.21051665904517	1.0059889894403	0.0836316123424538	0.950381674474185	1.02844810134194	0.180784828972513	0.0319632095808934	0.806947163426651	1.60591871587558	0.398288581162359
2008020	15	0.449188851315353	0.00195539592962814	0.616606478897896	0.217199912792682	0.915238992153354	0.0424503551222391	0.989760825615319	0.974320931176545	1.37495309970929	1.29920494130646	0.90631388897312	0.173184807682547	0.905478834818508	0.915748385991203	0.161682378008963	0.0121478562230792	0.796291734761635	1.67770793729449	0.42276220101503
2008020	16	0.418852825461165	0.0275668251835623	0.589156946816523	0.154390497104385	0.741904436747055	0.0445252921807113	0.923564273979574	0.761126407747431	1.29651771310101	1.38537977712455	0.768233342201253	0.257449159125915	0.849207740896972	0.863443167086654	0.156244705448755	0.0192621545311724	0.76217363199294	1.78961628774035	0.479629064773574
2008020	17	0.540615238942113	0.0616116892423769	0.588040128173727	0.107812076051766	0.565363507778503	0.0691444232371365	0.921322447496101	0.610664605239166	1.17848383328648	1.37233907728926	0.767020697973646	0.236833285115551	0.91777816137853	0.815242413851993	0.16019988668151	0.0319309820229471	0.685775244150222	1.71197101060636	0.559401320564674
2008020	18	0.818977757793788	0.066056373002859	0.62484219405995	0.0736589555638269	0.474095003926547	0.0851191342800328	0.942517815310021	0.506087826532117	1.08310537126374	1.2627738113097	0.713966226787192	0.322267649204109	0.594457414675092	0.772936676931758	0.160087844702208	0.0274471734204475	0.631084537348076	1.64971589482517	0.619731019813891
2008020	19	0.992454165561271	0.0568485030248461	0.659007721785054	0.0359226010335435	0.417738916849845	0.0682139598471319	0.933757840265144	0.428020206823959	1.04275014922506	1.2207028675909	0.673727194943134	0.318776931245512	0.142350897370346	0.730540434919905	0.216451306313615	0.0337182064857286	0.61966492131197	1.53621619910901	0.676920812758775
2008020	20	0.988699536208471	0.0482274060799136	0.642223395669475	0.0160229125240835	0.365184234151463	0.0480171934536742	1.01701459663935	0.365583677743177	1.09746802447603	1.34594571330229	0.704904160272312	0.275501268361029	0.0971356719816186	0.677265897806459	0.366837674485232	0.0314417629331968	0.750780760034733	1.38292197567967	0.84174627179572
2008020	21	0.954586188830712	0.0432597089793165	0.573292241495477	0.00600849233155899	0.302114896488627	0.0273800247854402	1.06409435168999	0.295623336024727	1.21912493281803	1.68104657928824	0.766103062929379	0.325058937031445	0.181791735516248	0.607410868431015	0.394035599444934	0.0155710690045714	0.918096450605847	1.33329537570151	0.959632116129106
2008020	22	0.866501261453167	0.0423278042482283	0.458719637454759	0.00390193851675844	0.255423179403525	0.0115122838039688	1.06383776990165	0.248346715365262	1.25634696309033	2.13068568796215	0.666883380718917	0.379321103038335	0.580319781753369	0.543871131925446	0.300522994479707	0.01098365712851	1.07630462891699	1.5041404605238	0.312210166526788
2008020	23	0.912518917851931	0.0368540229959188	0.460474629981149	0.00470038255647642	0.231884822314496	0.0057270824070369	1.10844959040499	0.278932979546944	1.4598969679887	2.3026924196031	0.5578430555803	0.368257281887854	0.686182800438905	0.499758007637584	0.16205812535	0.0107333347433995	1.07225307820548	2.03077983978878	0.118660599173733
2008021	0	1.20821656841331	0.0286702704424963	0.570603005264393	0.00895193189868894	0.208053419997707	0.00491788556030881	1.2790565834624	0.375960369463379	1.90035219451993	2.13542839736567	0.480218474475686	0.398744384378755	0.822493041568214	0.471215455272017	0.0699635411008069	0.0126109637401536	0.876195618921132	1.79171601632662	0.248502508345673
2008021	1	1.50980025702902	0.00110102482222845	0.602792775193891	0.0110668935524076	0.173345518699096	0.0242619216692737	1.46868115418998	0.484166578080893	2.1196996453279	1.81910478093647	0.491561704216115	0.481874658410738	1.04156335286472	0.443080060637599	0.0396826603968319	0.0173494877768502	0.701915168317441	0.622740045384954	0.157754485113187
2008021	2	1.76907759710829	8.40619415697012e-05	0.608080432001898	0.0105312603242742	0.160604701039596	0.157613021956997	1.48831430403047	0.482090109124414	1.93835921355299	0.505045818967467	0.585439653480721	0.591025580257174	1.0630685104126	0.412157418089418	0.0285294640091038	0.0395455557136056	0.546820834891635	0.767488106921245	0.169948952349003
2008021	3	1.96916645941554	8.56673652513024e-05	0.57719128699426	0.0121027188051303	0.203596676927167	0.0907209473138313	1.04528488409804	0.574147327178198	1.05549253189136	0.991198521049066	0.584935106358869	0.559353364121203	0.544693487492762	0.376782066885967	0.0213002284857738	0.103251377867552	0.400761459405245	1.88124908355723	0.348222640083019
2008021	4	2.07668750098805	0.000165034747511814	0.509802521135784	0.00925421736281218	0.284111894688898	0.0640563676899526	0.585580997951604	1.03844403739432	1.06000463832852	1.65835714923094	0.52609707073718	0.513228199928119	0.844619786990281	0.344599452038684	0.0117127686291541	0.169450972969722	0.348407680790073	1.96496757268983	0.493391314103174
2008021	5	2.05062371127257	0.000146901173850414	0.438159702377974	0.00660477003726372	0.378387160680978	0.0377236437125912	1.11374630842977	1.4258414869316	1.68585852169784	1.76132931305114	0.384611116427104	0.428286172055945	1.13212750810879	0.321903293623327	0.0118669214357417	0.197803323012883	0.340436428439479	2.17469026759826	0.577083680884355
2008021	6	2.0483710131109	0.000192388861548955	0.448006442938474	0.00460703675491685	0.629115053257863	0.0120962925338239	1.53978060304928	1.67373515504289	1.53799138467251	1.75157316887717	0.277686857077986	0.32294205482416	0.579119996875299	0.309581600957749	0.0157295659400333	0.156748820960517	0.309408253315313	2.28231816995697	0.574447786605861
2008021	7	2.07931082429885	0.00132130484663381	0.52572865908208	0.00348560177872379	1.07709375420393	0.0199418308479581	1.49013653818296	1.74933966243238	1.82874850410586	2.05608964830203	0.273283114545761	0.273187578842115	0.335922564819145	0.305897974481923	0.0132552831969453	0.140848914413917	0.318738424419101	2.0391138577674	0.81864085141039
2008021	8	2.11860728041575	0.00851570456611849	0.560240837897559	0.00435582283525403	1.3680872652535	0.0221142486702297	1.59789796098847	1.70768051196829	2.04210245686752	2.27499404145992	0.319811457252036	0.260036517330577	0.410519189177849	0.31209292556422	0.00659507340716179	0.0884383074571174	0.357636527286564	1.9269144235495	0.758073041715597
2008021	9	2.10633968614687	0.0149884846512972	0.572732790260252	0.0370787397289452	1.48689406208081	0.124027922663198	1.76407298288355	1.66441317267579	1.99701909884867	2.47065106743848	0.28046688145869	0.280117322307584	0.358461343512942	0.337299183402164	0.00773290772039406	0.0383048480042639	0.462711419766983	2.50652519498168	0.794677488767669
2008021	10	2.07104353695493	0.00326311541863106	0.552286660621603	0.0558325837325473	1.47222122785427	0.153889856843548	1.95602004440521	1.65024248274384	1.88230519042941	2.61534261627801	0.314171979972743	0.389318528292059	0.547113856500537	0.404434178651384	0.0109189920313623	0.047658716398501	0.655184955548983	2.310689742301	0.903383270504455
2008021	11	2.02813274772237	0.000571421466526085	0.545001318801682	0.0706851987556735	1.41918151428557	0.232537065444395	2.11960140188555	1.63699575294507	2.11538740209429	2.59626640989479	0.478470130823909	0.531515520299183	0.769799505272283	0.513592118756482	0.010623741608583	0.105226816350524	1.06819992574832	1.17984451914491	0.759214864144006
2008021	12	1.98491100594394	0.000159887216840009	0.511153258981549	0.0894850651618211	1.3704637183506	0.226122988279661	2.05311259622658	1.62869036741719	1.85776559361141	2.54764273256273	0.749390654211453	0.433232544216146	0.930222916453127	0.592699978050933	0.00894096844539584	0.115373963406494	1.11505097272609	1.18508140941658	0.721649400454438
2008021	13	1.94013148209673	6.63055066017773e-05	0.476713843710201	0.144033172315509	1.3836887886438	0.12364843109346	1.98937836310489	1.63336744189333	1.32938595568419	2.51666715943444	0.83036858853229	0.253638631399683	0.960578495470657	0.655983835729485	0.00695868542274148	0.128777439460851	1.13912206661421	1.3420584817447	0.50880746742328
2008021	14	1.87727881485089	4.59027811399197e-05	0.438307362857006	0.151454904610359	1.43498381206185	0.0998057103971765	1.97622659109877	1.61166261810377	1.21241302203535	2.51021467136206	0.859929226718498	0.175233041726503	0.90195483744986	0.625578488166097	0.00470722125766505	0.158045334887042	1.09527356889728	1.48722672845232	0.423178828880517
2008021	15	1.70897447166936	0.000904706395560581	0.271521446690658	0.144774076382086	1.44167540526755	0.0792254260233136	1.9543523273111	1.57387102968905	1.18797894272985	2.45557355668147	0.823410137715215	0.170156397414992	0.800435070148191	0.651652344660747	0.00265597092975642	0.140263830604689	0.941234327358741	1.51654463957502	0.694840838921073
2008021	16	1.57050106298344	0.00293722181587282	0.159783181803998	0.0963279507459685	1.41519502839261	0.0790542142445255	1.95644564353087	1.54755982663843	1.24794121080877	2.40097950023325	0.747475784127975	0.337632741161013	0.649554471528866	0.685442437989785	0.00100514851746686	0.0773932740392666	0.980199500716898	1.26268276152229	0.923441896252622
2008021	17	1.3083482005588	0.0394161372992937	0.190364283509928	0.0812583742236061	1.40359823898086	0.0862607002059182	1.98189958858943	1.51206067099288	1.30563488720448	2.37645574739706	0.694058049277008	0.349584795834977	0.578972691021101	0.660941070978767	0.000466069193001039	0.0626124894027744	1.0399161490676	0.901730397505023	0.564847527251653
2008021	18	1.11319918783762	0.107590908275875	0.183191350031122	0.0363081165896494	1.2881685776789	0.057488160742074	1.99575863830207	1.29184256287876	1.28019157155367	2.35702679514496	0.659109709503496	0.34993790113237	0.567662383663954	0.640106227185983	0.000335956770006417	0.0591031641093068	1.12219812421129	0.739016177788048	0.270758854075412
2008021	19	1.34226698917198	0.0769760816606944	0.19517524964924	0.00940032455699842	1.0558041451882	0.124644789224222	1.97484605452444	1.15343128123932	1.20831438506725	2.34894592186235	0.644708550524168	0.358065877864412	0.613042929689199	0.635110926709184	0.000280689723699582	0.0781219292756287	1.30500633144209	0.67611235472811	0.0655836436768815
2008021	20	1.60951028303426	0.0669437541491497	0.194007613719724	0.00303385911864884	0.894956073242924	0.114008469189706	1.9185791019156	1.28833323773734	1.07224656992088	2.38014070423673	0.646596091463431	0.387149332483136	0.693633923123162	0.672580844624578	0.000240735514985908	0.10390112466122	1.35710397963428	0.638078322482522	0.0251078501372939
2008021	21	1.86530279469549	0.0333213350916337	0.172095465202656	0.00387850931215821	0.902237576848299	0.0751052556342211	1.86505577812183	1.4974796974682	0.871522250487901	2.41889883742845	0.655089893553386	0.436279093813403	0.749874976776014	0.760271257058557	0.000204079360969807	0.137705853658194	1.00376928967571	0.612576411108725	0.0419166765028844
2008021	22	2.12982233411964	0.0121153187076826	0.145395637575156	0.0293145368254508	1.11504194159937	0.065299298643402	1.83150358873513	1.57587284743759	0.70332071263743	2.34559564456392	0.663222268413283	0.48189104037308	0.804981299851775	0.879539622495982	0.00027654831162699	0.125025185860516	0.887756117176913	0.607147606337683	0.207367888676552
2008021	23	2.30214604333718	0.00760918738119201	0.128150101947088	0.135864317934389	1.26710561698724	0.0294293265250682	1.83552377326368	1.69097002665448	0.65423332883023	2.13902521569526	0.661363453690976	0.501038531637662	0.849972600535049	0.931650492911026	0.000173024445368618	0.0499251354244051	0.955559938591462	0.620102948296117	0.270058323989091
2008022	0	2.45805220110634	0.00828886965774808	0.165446418384072	0.445652792505509	1.34594321673685	0.00885085475878142	1.53548366384759	1.69796099301403	0.6434537145115	1.98008716399615	0.588104151172764	0.485546403054968	0.863855202205179	0.93499796117438	6.52438448995558e-05	0.0228163410078354	0.872748229580835	0.696851092179263	0.329171129955027
2008022	1	2.62233594474882	0.0183995995753272	0.0911659696092874	0.676982801070612	1.41511330267643	0.00547881075425807	1.04364361084451	1.69363084257252	0.643871458106553	1.83601222604968	0.375153425646885	0.467021286191424	0.878960891182969	0.914307292686257	3.32535259872538e-05	0.0124318063336429	0.776023169354753	0.845304052994135	0.381353125748651
2008022	2	2.63790114029627	0.203764336225956	0.0180080791989133	0.748045348914376	1.33295209762354	0.00345115884334734	0.585803114684519	1.70392875809393	0.674749399306831	1.33459656431012	0.223400938917019	0.459984640714889	0.823250117028544	0.87808849625155	2.67362391289576e-05	0.0113048825311008	0.659318693608791	0.905593469409798	0.395656905971618
2008022	3	2.48086212001994	0.536673918598469	0.0884292801155554	0.81758241207218	1.07132997207672	0.00266144068494002	0.504960765952556	1.48885029408677	0.862670691411262	0.628827870686735	0.188818601848407	0.460489543853368	0.804152083508198	0.830697783334636	0.000115720657142557	0.00784634122090677	0.606396053438672	0.922307144928652	0.820611195192743
2008022	4	1.14700090439907	0.725436312837188	0.223010884633112	0.898650288137974	0.882435288007932	0.00107072268051027	0.521558706399376	0.993041345476274	1.05655875598055	0.547212439427217	0.164839954817121	0.469851030870281	0.887577948422623	0.778391515325942	0.00361652130507819	0.00220623323342856	0.598183135537223	0.89668306903302	1.29019872107948
2008022	5	0.773749378977214	0.900461919710585	0.093323313293217	0.907441955530998	0.728197845168398	0.000864587292304932	0.71295054954185	0.706344642378311	1.12713709017498	0.543526267218865	0.129276935298183	0.488127573926448	0.883295612269468	0.71490121791237	0.00762079581841836	0.00414828177961435	0.642539224799224	0.887502996839401	1.39374631385977
2008022	6	1.12144910558704	1.16584359499899	0.0283460578153807	0.833323163218901	0.622084293035994	0.0520564216198849	0.88452522970067	0.541644158669825	1.13136178248957	0.588350115397069	0.0900429027421175	0.510956742912776	0.95601204920204	0.634347582218765	0.00248462216547742	0.00289354952727167	0.766315145283429	0.909297248378546	1.30769155918858
2008022	7	1.58030213281032	1.21136584622898	0.00281841804414969	0.844732489154285	0.569948087003289	0.479327690766856	0.898000492763694	0.421992127354495	1.06763543175247	0.626408838452949	0.0637502328627928	0.52346257138333	1.00135616464805	0.563928980740015	0.000322219664419354	0.000969146572592491	0.749758170604398	0.913991517368255	1.21757428041099
2008022	8	1.55561734765251	1.25924943984862	0.00241623093130465	0.656313000853871	0.636628159799728	0.579779509604991	0.8866170840586	0.406887219095178	1.09326765826506	0.638755387934697	0.0598443431918929	0.524466581134948	0.990977252991013	0.530760053297192	0.000168946506236162	0.000107012191749639	0.733094013858383	0.945671415635243	1.17780341891155
2008022	9	1.26070242326779	1.5255222371374	0.0105439531612427	0.510220048884376	0.860939375820087	0.715220161078566	0.879740546519361	0.465711752533751	1.09592659800485	0.640784696575725	0.122581057137045	0.515106632533018	0.92380972713652	0.518481863554045	0.0191253522922684	0.00594589364425727	0.739848737025342	1.00604616903944	1.07358620438403
2008022	10	0.742283903696563	1.65408797341735	0.0187891427830648	0.438526321966403	0.998375160386296	0.676527296983453	0.853107077833977	0.729541714280915	1.0759384971246	0.640686340041384	0.235335858756112	0.499910214011066	0.884126116989608	0.502483594306157	0.210324761042678	0.404442781711771	0.685468257586234	1.01118908629863	1.15880734043741
2008022	11	0.573214531885873	1.57378381168063	0.028945130287057	0.437467277952653	1.03501220265484	0.596082653079077	0.790196771669816	0.898775604154693	1.01347974544944	0.648578186940064	0.289182157514479	0.483580204726842	0.853360571005837	0.508624419553213	0.459909241083109	0.442485324839144	0.511128189771736	0.973811683343584	1.17556981026453
2008022	12	0.549742566803912	1.39063328919716	0.0536289991989251	0.555584906321959	1.00946354673345	0.477255481640984	0.731666881885346	0.905984745401326	0.94148668914519	0.677575167500889	0.335575591836957	0.473337671201114	0.846182829801087	0.545338503889054	0.605881687672373	0.403068902190935	0.474243460872771	0.953812211875215	1.16783936195145
2008022	13	0.561862119621512	1.23102785064678	0.0797678781813972	0.704325736701692	0.957472187282901	0.481770279057656	0.718529439343841	0.898494723882566	0.88641440586966	0.736192098509855	0.396952585093068	0.468438681515844	0.795247597784064	0.582080113057874	0.529202843259547	0.261884596503801	0.488088777480947	0.919867730692067	1.20154210298477
2008022	14	0.620628191142732	1.16494520650247	0.100736706073142	0.750299835782864	0.944179660118635	0.506151840318348	0.705437728783395	0.909847463583062	0.812942003572484	0.981695999298125	0.357315208158093	0.464581795847673	0.736640567268663	0.63144274504277	0.350986974680727	0.204882656839057	0.489538981694821	0.892178722488697	1.12881557788662
2008022	15	0.807478801445367	1.14515383049553	0.110623428263696	0.811399937453777	0.936099611027856	0.547168928328982	0.701615314507692	0.944859473424859	0.765709753815379	1.19691488890972	0.315441435581337	0.46268251510373	0.681906490069167	0.665009219643853	0.367924986806137	0.256785943750687	0.493090998180745	0.87435573375583	1.10386801522972
2008022	16	1.22856771968693	1.08378406160689	0.102426660528143	0.856547365830143	0.91718278906079	0.575629830042665	0.704079271366074	0.983835365921139	0.75567940978912	1.20480630064901	0.263035422891844	0.457804309178442	0.642623162811885	0.66545531503497	0.341688161395548	0.30567810803106	0.490184848929842	0.847616829798719	1.06358907824578
2008022	17	1.42678512255152	0.982758714154343	0.0952797702038788	0.87380879446892	0.893193848226226	0.618695998363714	0.766006378013347	0.964751651884592	0.769023743993004	1.17408990432139	0.22333466781033	0.443042313835441	0.617818270861247	0.663313504408541	0.260973523913319	0.324734379097994	0.49533864263307	0.783235239958045	1.10976188675463
2008022	18	1.3795380842836	0.850508859102965	0.0921024120488011	0.875930388085581	0.873097166399667	0.681389669127734	0.854404571132814	0.831766172597798	0.782625794306179	1.11894898116887	0.214938519667209	0.408085851417141	0.600451230765087	0.660640675969712	0.252264932074157	0.377431849901063	0.510076776233999	0.721472530403967	1.02654866900985
2008022	19	1.34449335365404	0.729953346444718	0.0875586867123016	0.838051928062553	0.880069321092772	0.746575265341183	0.943739238903114	0.61895321663183	0.79287068190898	0.979250564770693	0.214167773602822	0.369685054500156	0.583593218428101	0.661643494013383	0.230980301203391	0.45441464016848	0.530409411674326	0.686722380795207	0.976826946463969
2008022	20	1.57410616855915	0.641480266108871	0.0822685300671972	0.751968406071842	0.87925884338586	0.796357036254075	0.950296787595857	0.599460977172585	0.799447650851153	0.858713247823637	0.212477928534058	0.342979874399051	0.556867024233567	0.654479165311537	0.22699181539898	0.498775415970095	0.55625560843293	0.675766628139493	0.958764527994371
2008022	21	1.77632472657914	0.599958129438799	0.0764119270102351	0.627816043163594	0.823106279300495	0.764458494565125	0.911208627774619	0.735875155422409	0.799852234170363	0.779341778436481	0.210051669175632	0.339557276590592	0.554420462705753	0.640592783447641	0.241580316640304	0.553731436154108	0.589890863662571	0.655660005138792	0.955845894045394
2008022	22	1.85042414427536	0.590881460738977	0.0685659892896473	0.509397853064033	0.742692580307178	0.714489553008772	0.84762175054702	0.924059612900765	0.787364042327045	0.742984035601907	0.210615690162857	0.350694564816332	0.545353170218744	0.631903807206101	0.249113727429989	0.581566817602364	0.610208086998699	0.632322147765116	0.945370436464354
2008022	23	1.80020336427334	0.606620342245519	0.0623530723115816	0.419124433704046	0.628458058815608	0.665358961795843	0.751091476083609	1.097458771276	0.767957756165017	0.8012250814828	0.218731748422709	0.359386272400232	0.535735404086457	0.610111883477987	0.249257848389019	0.57814346251993	0.609719694201031	0.611528273625489	0.908076733753062
2008023	0	1.62444017230251	0.722056963648936	0.0577586221819991	0.420829159133628	0.588877182700005	0.61053541397739	0.668425505105504	1.25690518236876	0.748884879341097	1.11541106660424	0.219447621338949	0.372299328929197	0.527114667854431	0.582562548501158	0.229011536073754	0.596125979993353	0.604028662556917	0.593829281173833	0.788355910608108
2008023	1	1.49258078309385	0.889211434516787	0.0544593764071662	0.436662351659929	0.620792937685418	0.564671206227934	0.619070698861343	1.43082070709907	0.734620002825003	1.61909953517459	0.209905265624009	0.381353760825712	0.501964968200007	0.589912586501037	0.195512759291758	0.597925059340778	0.591815828218512	0.576059179333569	0.577485014119534
2008023	2	1.45101514410239	0.968831969265619	0.0514872046239295	0.489763085483628	0.828180439532636	0.534848616493613	0.600435618857461	1.59720487827769	0.728238097071676	1.85488118213142	0.188669206379584	0.391884702773923	0.472576352129966	0.600219505988128	0.188562955106649	0.535888059454427	0.560844829501273	0.560859404714923	0.330517030182095
2008023	3	1.39305121204121	1.02661419667298	0.0490226803589131	0.699251856833523	0.991439808838298	0.553447975511095	0.624642358916084	1.67029816893217	0.73498704901607	1.66792293028985	0.173378145425444	0.400424431680322	0.466012137296882	0.603683613373534	0.191546220893709	0.492531594690585	0.522229923278169	0.558000962284914	0.140176814282969
2008023	4	1.22415190695272	1.00863448947465	0.0474154292214295	0.727191465081132	1.09781562198139	0.697331928642335	0.818457884298157	1.67060146986698	0.754849082550886	1.22550505957324	0.180994052503466	0.402930955715073	0.472983946670904	0.605895585984577	0.188661564559821	0.47233823428969	0.493203765023597	0.588239402945957	0.122621050450861
2008023	5	1.10265399074658	0.935155961108356	0.0448588494575406	0.68421671821249	1.22485557164923	0.84715178961499	1.28438149850196	1.56706195389415	0.77483748852912	0.990901286992953	0.208649648713298	0.401089796851493	0.552605409339222	0.626003509513059	0.206258597497705	0.460585116844913	0.464236849795172	0.616848635563796	0.203861017696725
2008023	6	1.0768874083547	0.85091034184367	0.0412022857261884	0.656002944338089	1.39329137519847	0.879449944224676	1.58294384244937	1.35055228000629	0.770221050537583	0.835069770247314	0.223575633755966	0.38749458440587	0.897462873600126	0.694255210816199	0.253777594740178	0.464039676561612	0.436551955426295	0.64615899562827	0.280802575805348
2008023	7	1.15431887369348	0.775470046211141	0.0432247294645605	0.65097068580709	1.50950787206425	0.927130107001747	1.18240740322354	1.26081892492906	0.747413849828688	0.662017995924624	0.228953697882717	0.342481122883654	1.01420419863933	0.713051227029268	0.266173856884516	0.60450621084922	0.411442934910523	0.689129565906046	0.389057689241497
2008023	8	1.19845180035052	0.735572533193804	0.0409562934157881	0.688631364309543	1.46992013378439	0.909640974460442	0.932330415594964	1.20127760384916	0.771363087777754	0.527262221913244	0.244765813640869	0.264952338533731	0.89982121160947	0.659119209410631	0.284465803719834	0.709482570524713	0.390339035445919	0.718467443149396	0.481604913585772
2008023	9	1.0261041984049	0.781588074032263	0.0481302101334865	0.838533408212357	1.23101173411641	0.878523179942505	0.795258693299211	1.09845397620952	1.2428802361198	0.34164174210087	0.245741983558664	0.19446783312396	0.651492152697393	0.538549231271615	0.309286908018748	0.666302423125973	0.382792687401096	0.771268329436679	0.480140098128883
2008023	10	0.901801107919617	0.81904408275618	0.0536805257250933	0.918379233820904	1.04277822267305	0.841649177877949	0.724318030623679	0.942128000244305	1.34921229485689	0.193751514886609	0.280975325846869	0.14836625146966	0.491844861765576	0.436210040791762	0.326588633966335	0.743073592892757	0.384767387759796	1.07652764079256	0.348324265939695
2008023	11	0.794439536619895	0.715667105773724	0.0610004573615583	0.836080954003806	0.951177698328297	0.794971873691428	0.601960598858688	0.821237275204792	0.965505895429889	0.311046970235026	0.33236800163381	0.128644415423902	0.460182785855529	0.4228643574731	0.335079081472373	0.821674676659887	0.399973835460895	1.17163502118213	0.272833459800387
2008023	12	0.83980581265152	0.510502267585342	0.0666592033607202	0.799113147882076	0.879280715238925	0.810094800832338	0.440168286337203	0.612103498019702	0.805362722887507	0.444889450960724	0.376095385206096	0.115250024169082	0.491614094136244	0.433308673735598	0.344075764520374	0.834137842608869	0.445947460971685	0.944915154147738	0.352336110638741
2008023	13	1.05079875324468	0.382584791042299	0.0705598134893589	0.848505989840422	0.898684819655001	0.806001686255414	0.302669457561026	0.333692148386785	0.4742432905443	0.585140845474206	0.408871315613666	0.11635563425471	0.487488686357165	0.4445573882115	0.355363077158692	0.822562593027323	0.552345689961147	0.762684197945283	0.409828710887484
2008023	14	1.24583486826655	0.295879373231525	0.070657274691704	0.850379732892285	0.87542144777193	0.774204396448565	0.235618186705799	0.109877464934972	0.303045520270916	0.743282729361594	0.436674602902344	0.119192299262707	0.474528038281738	0.454855891994238	0.372259651950834	0.811723838779107	0.645049129748237	0.536182856947541	0.545052078536399
2008023	15	1.24789588422614	0.257573681782505	0.0648053168011814	0.826444297222731	0.707491318230826	0.656345339209152	0.202320551419996	0.0527636106352762	0.322356730960583	0.861829423624833	0.446414669258261	0.131226041668269	0.465153226977834	0.44896405073084	0.376617593858971	0.798380119414569	0.670295596000728	0.478399454757675	0.640501983269374
2008023	16	1.04325267575793	0.261245091724694	0.0602703079262816	0.771231898344569	0.194020837755315	0.489150605057006	0.190744790530326	0.0523861581930852	0.338259230181712	0.91517518177085	0.448057137410265	0.158265956625554	0.453568395672865	0.438232916611054	0.386296174459028	0.771365315908549	0.710308482562683	0.517798141548312	0.591905878308509
2008023	17	1.06206271230794	0.228187149556884	0.0520252882981205	0.597831300879099	0.0413513576293925	0.37194342578244	0.191745383125322	0.0754773628139721	0.301788461071962	0.904512004073594	0.445863005302419	0.173103136356962	0.437009377403663	0.431861224241054	0.412584058615409	0.719331407844857	0.837484837792618	0.512421018767064	0.501481968197978
2008023	18	1.6003619532015	0.0893169163350782	0.0460170195004941	0.432921858624578	0.0234166573384738	0.305564093943999	0.192528422527552	0.0753178339286834	0.270676927457527	0.883329733569451	0.443407874600295	0.176303289927666	0.426534434216793	0.432868827893169	0.459139341813522	0.609329651619021	0.7261576653047	0.502380052180336	0.437116714725831
2008023	19	1.91776539180386	0.0244237162046727	0.0422450835398596	0.337397420439425	0.0350215937597244	0.281197490396458	0.197609069396894	0.0585897888836262	0.32975872605685	0.888326245604397	0.439950902742842	0.177094797008331	0.528812100736241	0.444981132200458	0.517173205308487	0.501074089679015	0.664750279945969	0.501318396977361	0.397755759302473
2008023	20	2.14770526642838	0.0855579182265434	0.0416508245996527	0.275595040485211	0.125606073381632	0.259183976434107	0.219598203488516	0.257965535685485	0.422024825274993	0.951348084872052	0.425647470643144	0.176754767432886	0.843956666606558	0.467580767494149	0.541494104041817	0.448012940642361	0.651967798476947	0.622815865839982	0.397713255289658
2008023	21	2.77713539092513	0.311766507531237	0.0394750724483707	0.197339834056099	0.0814850292039733	0.122782133529039	0.240985289905957	0.637486095591529	0.513491421016805	0.813605712864923	0.4109323439294	0.175593750530962	1.15315318529721	0.494017161952735	0.477302009011248	0.447533115912476	0.828564919176482	0.797124200969826	0.464367277394176
2008023	22	3.21250264471918	0.379271279200933	0.0370556908893004	0.0665945344834351	0.0828039671887891	0.0337276074466117	0.244436826977876	0.973429615464116	0.52989839733421	0.605151026588181	0.394749620886222	0.174545203971197	0.595801290277763	0.506153391866549	0.395747261361677	0.402835488379312	0.864454542686048	0.920634814958948	0.578733053491422
2008023	23	3.73098576770383	0.385551934975377	0.0373567065339425	0.0191516479846762	0.169076661666846	0.0567379865927246	0.321490561913769	0.967589365571173	0.515672894900998	0.917462129204705	0.375891514681744	0.169890869597519	0.140103734031567	0.500513124274411	0.379339699615881	0.315982894402006	0.734159961908484	0.943538580397169	0.668179299604875
2008024	0	4.14662292501771	0.39233085315199	0.0392176681794517	0.0563587510789736	0.405890890999138	0.137730184518239	0.588965014985339	0.599085163357493	0.330106763408048	1.44066840022916	0.368918009494981	0.163574195979748	0.0365347138527291	0.483299619760689	0.399844218665672	0.238990007017967	0.539990633455364	0.60329390261115	0.608732629954507
2008024	1	4.34859571020788	0.390777012670924	0.0438574523803712	0.180966360371767	0.486255179650008	0.246493231617478	0.777347918088681	0.558496093934136	0.540893335347134	1.40749752539864	0.424542460609474	0.158124856022761	0.0388060199081894	0.449771958844261	0.493555151107389	0.174907550957266	0.312491003650473	0.190199038318673	0.55350374362983
2008024	2	4.93599295651409	0.400910174646601	0.0488203291733822	0.308366192220763	0.347532586910376	0.307514962651812	0.668595990374963	0.641358062452981	1.4084169776772	1.86751923160303	0.478572886503823	0.168072734537041	0.0887657708276981	0.403697963089242	0.59343802644215	0.0820182309058695	0.190119893951015	0.381615333531588	0.641380265457379
2008024	3	5.26378530703524	0.442894840310426	0.0590504622011184	0.377174323161547	0.367624836767508	0.332099234541648	0.569146796645459	0.842522974009287	2.39488567716652	2.13775629090291	0.519591951327185	0.19973227388187	0.33882927698814	0.364252260408103	0.655006074030554	0.0283568768548125	0.167533318591916	1.69908376742142	0.831300061095967
2008024	4	5.07756968862483	0.502016582011978	0.0647011036417401	0.397750211761368	0.423028865575083	0.363468237627038	0.745054749769086	1.06531346585154	2.55135966015378	2.31419537549908	0.633283927587788	0.2201933478987	1.03494506435565	0.341526645755203	0.644877617602612	0.0133958516444627	0.150420528577053	2.15017710617947	0.923338731666256
2008024	5	5.03845145906715	0.467977200437399	0.0672929930893285	0.407904366898518	0.493114869749633	0.401489716657932	0.855595327023553	1.19377103617968	2.1518952458678	2.47993802659503	0.789103062039814	0.235560960265579	1.20185980337521	0.332683397304832	0.601940980919062	0.0269896379528532	0.130279971463974	2.1043689488549	1.0355867026249
2008024	6	5.15864587354245	0.358022582198097	0.0673428886500452	0.427334811876556	0.612531123804255	0.441587727665196	0.978723625013901	1.24114169529509	1.69090643498391	1.61061475098075	1.02362991560065	0.274307563120474	0.70780385494078	0.352610125062787	0.517485704739456	0.0583783871625302	0.246290111916342	1.75399264822506	0.98236438708084
2008024	7	4.80319684709546	0.305384833251327	0.0623341601999949	0.436769625169009	0.780059926074637	0.479526731769722	0.873676200210615	1.20909016792424	1.49052298772668	1.7513433427251	1.31577331830775	0.373537337249691	0.445688288014236	0.362083409352704	0.425663105510926	0.104005575742955	0.4727194368718	1.6287226116444	0.867456367910036
2008024	8	4.69374394957801	0.325405316313618	0.0552939432168975	0.416354308390115	0.910302403340359	0.457768841440751	1.21535501287285	1.15270904662127	1.57510638598165	1.75367757211398	1.56433981011288	0.472945570322144	0.308248458231118	0.356394130025736	0.376954187026205	0.144151517686521	0.573339971537241	1.83106527271391	0.324848859830429
2008024	9	2.0713523723984	0.396522271899185	0.0479723870438618	0.367269444004211	0.93589749641465	0.413217768781638	1.34779850878261	1.12235623714045	1.62545940602009	2.1089588777998	1.65085993416542	0.46915314755216	0.173556399286212	0.337093873384697	0.315443459560174	0.161818522682934	0.691973356520096	1.66036156063187	0.329686853998322
2008024	10	2.31978399889712	0.471147929573913	0.0692793836075293	0.311742630623231	0.864723456950325	0.38820662786531	1.55847023007199	1.10218666530084	1.89382587646968	2.40423436376944	1.52756139446213	0.372120874797328	0.159167639238958	0.309586222652583	0.246558909816538	0.169520344543953	0.991669668582912	1.54351239202817	0.472777483963816
2008024	11	2.32336639686987	0.432126896666286	0.0811632604074501	0.298952163424673	0.933131655389247	0.401815627979142	1.76554544713607	1.25830607128289	1.49632000783831	2.4513467019058	1.13541671594593	0.348849870096302	0.26693126471837	0.307057313748248	0.153053358403675	0.174542658169147	1.12089970390514	1.41206480055214	0.518664055561008
2008024	12	2.20847425894704	0.26940769285303	0.0874325875787665	0.32670773972635	1.2363830228474	0.40051836528733	1.85473916812002	1.54503778351033	1.74906177215928	2.44041483207477	0.502460765456143	0.369430072748495	0.266044298630031	0.568821829440143	0.0559014188951409	0.161146180590123	1.20091594820248	2.12656656642872	0.565852443949521
2008024	13	1.93671135643133	0.148165358495319	0.148848458899086	0.347406897617977	1.21259234845458	0.396124081196728	1.87131585574164	1.55470642824623	1.96810424647346	2.26216510466526	1.51664289913312	0.379037572476885	0.474442016067005	0.70203012954752	0.0260702413468108	0.153918132337911	1.31735877217108	2.27064337001429	0.512999918418485
2008024	14	1.97717457206527	0.291011624147596	0.204793085286311	0.26523513699702	1.38118452404782	0.39466118592865	1.69628821145059	1.53496630590813	1.77648987849978	2.0707524620372	2.5620326345737	0.377971001233594	0.706118021234075	0.649134400203492	0.0300936233729005	0.150597987755418	1.46247470041922	1.81316156353473	0.452477736130083
2008024	15	2.10013137780574	0.469268223518422	0.240660025389308	0.38942043754636	1.30238080442108	0.407528634475784	1.66599074008877	1.45981980614477	1.38031886492719	1.82935720898429	2.44722557732257	0.363329576723481	0.718433453313988	0.612846575252347	0.025629303703792	0.149364501198834	1.9095600033284	2.02747638066909	0.433269685318489
2008024	16	2.0979619501703	0.576761402524746	0.211876275387072	0.52208723428278	1.35031615871102	0.359092900121278	1.48686805112809	1.38099891331199	1.44188291190369	1.93779511050359	1.95631210781082	0.351738081847699	0.606361316463755	0.568086207803048	0.0317325873173358	0.148917155241356	2.32433567390296	2.06380718830882	0.454425293592907
2008024	17	2.14079243413214	0.548095064028894	0.192505191474255	0.600988236667537	1.2848078653427	0.136025588669475	1.63324295899176	1.48334760072862	1.51493712539046	1.91893638246399	1.12332742781627	0.37420108998907	0.661499655686141	0.554038364400653	0.0482296674771017	0.14904562914548	1.53350249215182	1.77922010080465	0.538343027632844
2008024	18	2.13069322213119	0.482091118924715	0.165387181276086	0.647146788816657	1.24178737659216	0.0513905382742137	1.51623952225325	1.46799323758888	1.74158211954844	1.64863617117643	0.721111884791704	0.440945333820149	0.557139622918602	0.521265712965935	0.0713044871687558	0.143540207559972	1.29004969762098	1.87493140565234	0.629616091156779
2008024	19	2.26258886537709	0.497287010369734	0.122505215490233	0.583806046390682	1.29864866303068	0.159533854284729	1.45941425005502	1.40699496599128	1.71964546005031	2.08596034558416	0.506237473473611	0.476879520714513	0.857166971807293	0.451373550969604	0.093021102365889	0.114293813376236	1.18850310603296	1.96441534815611	0.620013409447597
2008024	20	2.55612204209189	0.599121173069334	0.0333446959231162	0.560557615186814	1.23577454234235	0.219600570851076	1.76418445361979	1.64519169694875	1.52379854619277	2.03110833398294	0.388502585226176	0.432423488960628	0.93461591421595	0.390868315962752	0.105237508869787	0.0566348159323373	1.20720164034139	1.67712917350478	0.558757369835011
2008024	21	2.59676384363737	0.69490673862404	0.0137227261529055	0.576480099804681	1.26605518291397	0.234389499202167	1.71430312232753	1.71598706483279	1.83488974542067	2.00984893016532	0.640210316946188	0.338243824934304	0.851986799524574	0.390213360521026	0.111273846892654	0.0200382465431659	1.22812790670895	1.99899475749088	0.526753024815619
2008024	22	2.54385496738907	0.691695647286614	0.00591863399535776	0.597319015578162	1.52167930046361	0.206613429516829	1.67896857968405	1.89288436248243	1.83290835803623	1.97241163281105	1.3422869112214	0.209889153181631	0.552160230723276	0.66324739949644	0.113305845027528	0.00609951445955846	1.2191904444497	2.03552947023445	0.504421697398404
2008024	23	2.59956890240369	0.722102194765644	0.00243822622512806	0.746206807381023	1.54456829492686	0.203513981112115	1.6482795754017	2.03808556792204	1.68778522613882	1.78602076020441	1.37156571573713	0.254800433744977	0.535457809002086	0.691050972795209	0.0548828898043118	0.00320371188138668	1.23283932144274	1.58369642811336	0.411157219167426
2008025	0	2.57748650785529	0.654436322263753	0.00153222353524778	0.933784347364328	1.68076797784894	0.297347852838327	1.50448745566829	1.96497819096648	1.85487871466825	1.23403915739364	0.974958086082923	0.358180031053265	1.15726082612846	0.760548487237495	0.0171753627195532	0.0272906698642097	1.3667103478022	1.48039633578646	0.319089978899466
2008025	1	2.28816491702075	0.623456766349851	0.00143743599770686	0.960448182484893	1.71549867630432	0.33720094474403	1.03565697574082	1.98426792805478	1.99106358781312	1.40036973785405	1.01256395482558	0.291311652082573	1.11767788490809	0.768460751843406	0.0158749797587233	0.0714885456281919	1.40836246871537	2.09926179149391	0.279506100661649
2008025	2	2.10908716102348	0.595456630272259	0.00501611804386641	0.684477179244747	1.73498375799844	0.382642587307469	1.11855894370452	1.98703531637361	1.8701477197338	1.87695835690116	1.18984160541471	0.398576494577464	1.06871446442769	0.720635620002486	0.0774143724483686	0.096987916647804	1.49696815507423	2.23803952639728	0.265072294476263
2008025	3	1.97297319900762	0.559375696445056	0.0158674717938706	0.792056078927385	1.80140744602885	0.439782279534435	1.46312829335855	1.80110275730422	1.50336125180711	1.9686842478302	1.00656910740505	0.493574205063541	1.20194013037241	0.718258862379349	0.148138644253909	0.116554074184784	1.48841561243196	2.15906412884502	0.293550732287266
2008025	4	1.98755566248549	0.526318959586786	0.0227314792064531	0.891478037649449	1.66379119054565	0.423599088569624	1.54338994281429	1.57560653153594	1.45025324317338	1.93441535671791	0.86618393947247	0.472902722859482	1.28920723635454	0.763240535056298	0.163227749913952	0.145013551882439	1.60876796260852	1.84260419086054	0.335060149950587
2008025	5	2.47591171341765	0.516973806922847	0.025497033187789	0.839863294734597	1.3661075411137	0.374379280251616	1.51911964578444	1.50261309291404	1.75195559178167	2.36520569019106	0.779198358879891	0.468394805707349	0.854000283782817	0.589920871752651	0.192226969114515	0.176113863726782	1.65273889621092	1.89517022662087	0.322401646543494
2008025	6	2.62922233808248	0.435960104720545	0.022495246959982	0.595720021575142	1.19706025847551	0.363042100137605	1.82766457826769	1.35648000850537	1.71057677200398	2.68135530172294	0.768477520684395	0.475585127030707	0.43884018040058	0.361337543575514	0.255038941127922	0.224292361201293	1.68363283066226	1.91709612310338	0.279106650093715
2008025	7	2.8351148041927	0.316905258688157	0.0191441670367523	0.471846081140763	1.1012486529823	0.425365210329274	1.79106415923821	1.58816489375316	2.16317307988452	3.08166914212102	0.824894606867562	0.705628336710017	0.377935409195586	0.336151353535368	0.200158025627159	0.378324998964671	1.78549045490894	2.54166956021141	0.275935920313344
2008025	8	3.16665828183919	0.290738235125411	0.0168223502918712	0.458782957809091	1.04334973159623	0.454535731261121	1.982773344631	1.77586904046812	2.3415987085269	3.23177881872686	0.873077658566858	0.746399946779905	0.342738932454271	0.598575403154218	0.214032362244288	0.455761739879291	1.88749504259149	2.72486352779143	0.512876637393566
2008025	9	3.64109542884735	0.309868941942337	0.0173995167919382	0.371238015128314	0.801946998392272	0.454590371719577	2.43940944841007	1.97675251328444	2.75093274162823	3.09479999410857	0.857910693797912	0.47356969279243	0.510392082316808	0.547175581207114	0.25676638769191	0.455298443096175	1.65326868180255	2.74157023646293	1.09400491979115
2008025	10	3.86763893823787	0.387344202698602	0.0263614350575011	0.293930138491516	0.973087793475142	0.386872216138849	2.50445781426836	2.14199321423826	3.08535425245989	3.52123474362685	0.694636128546223	0.285481754713018	0.338028916053038	0.544549046041145	0.259492044238004	0.450458322379073	1.35598487031608	2.3735894170865	1.31045837622143
2008025	11	3.79960799244557	0.507346277659643	0.0869199846618136	0.309067864402636	1.37476284403755	0.322404133089021	2.74761074174089	2.29444274280722	3.00938939944881	3.65799432452272	0.886996923912917	0.222629260924131	0.16148916139866	0.847947762497528	0.259682255562906	0.409856816234187	1.18417006703329	2.69115392886468	1.5244171085583
2008025	12	2.94336987116503	0.542844701302544	0.166228169393742	0.429813713971388	1.88215619848116	0.309145974253426	2.79893267563749	2.21975870070112	3.41930778162715	3.54490329486458	1.31429087330499	0.204047407424705	0.735780228440556	0.956796873007588	0.23835534247474	0.371610014451538	1.15008309141035	2.91360250432504	1.67265343492161
2008025	13	3.66314237146926	0.608566230274139	0.191241513924004	0.46023277845974	2.06134823575601	0.277922323617009	2.7167387075609	1.9010257730145	3.55887646995228	3.3077478428841	1.30248154479856	0.189331599515297	1.93499836136505	1.1459254835877	0.343720953713372	0.36938909589511	1.30939688712259	2.97348300161967	1.74419610675132
2008025	14	4.08687912724201	0.646985411693501	0.191788888460074	0.432892374352402	1.97337722751577	0.289319321717687	2.41196931825789	1.80388172105973	3.59155810023589	3.14733000884066	0.934573271003482	0.275603425228676	2.03836682665475	0.962698518612067	0.442720748286479	0.371887985807179	1.72856423828605	3.46791399487287	1.67624582005174
2008025	15	4.19056390819284	0.687229391622642	0.181919677081089	0.456119602910957	1.89786631415463	0.345227753442376	2.25401203345211	2.15941731772239	3.32575372687698	3.08711392838428	0.868872000351487	0.681180334998396	1.76060932903965	1.12980251839945	0.33124218868651	0.326376754253535	2.01398591944099	3.26599968927439	1.63558742139016
2008025	16	4.06665010568373	0.707491779221806	0.165812558921344	0.460155873975237	1.98354186133068	0.380305478125974	2.02247246170917	2.38215623281565	3.00658319278772	3.17268889984043	1.11485695216979	0.784984522961714	1.38437175651824	1.06934013238811	0.27111354523908	0.29343831636085	2.1989134210815	2.48952808745236	1.52754600810321
2008025	17	3.99487462916337	0.696260198786455	0.144677288998147	0.462759952585519	2.06643905522593	0.385642849565442	2.42100655427375	2.59075054465552	2.95860620210851	3.3006371514202	1.97760171165109	0.666998508426705	1.26160438955338	0.883572768847079	0.237192169495506	0.271893961159412	2.23368494632804	1.72392661419706	1.39666371451462
2008025	18	3.99697518995824	0.650749723931724	0.127126732631178	0.489178863621593	1.9941498297653	0.422564848740984	2.55226824560061	2.85782618998808	3.07170245190037	3.3063044787711	1.57871128799874	0.503291298232639	1.19783613348736	0.752619265743583	0.21632511222698	0.238403718715797	2.27759707760428	1.13308556960537	1.15446086344859
2008025	19	3.86403459920132	0.610965002865438	0.113688013009189	0.486019290503694	2.15782900751831	0.462207346459288	2.54063915746532	2.81960983263514	2.81556506127617	3.3044264121564	1.06742413085842	0.42460271724474	1.15445357374154	0.673550307082591	0.218500274650985	0.233085081787917	2.37441539438471	1.837952168241	0.971439819294003
2008025	20	3.73468060816304	0.587268597962393	0.103042400388187	0.475500046457251	2.54013891881771	0.498138567576189	2.56368764870284	2.86818506277395	2.69973577231376	3.26005877084418	0.756613934456465	0.426487421760528	1.22153567340002	0.654874571016417	0.180388567445798	0.241128586173236	2.19852797882332	1.66685616675582	0.903818268362292
2008025	21	3.64979069950263	0.567021855285319	0.0943856874312737	0.556768417565262	2.74444649106908	0.546830076867914	2.54779949224181	2.785174052586	2.88098279501251	3.16822977055701	0.697816573108247	0.412679085030626	1.29731262082485	0.671793497011678	0.183304226584531	0.25261592250814	2.19403059007717	0.548744587322515	0.801847423205799
2008025	22	3.50171786783406	0.527207002969424	0.0881777190350771	0.613819839172821	2.73558966657558	0.643106159543754	2.49766653192058	2.63880066912201	3.04307571519571	3.12181373775139	0.680822862601983	0.41031193292009	2.29651473323074	0.71093643737317	0.229057098804973	0.322329174231231	2.89121888461481	0.133987659984731	0.813671413072059
2008025	23	3.34716426587758	0.496425877083345	0.0870621025549841	0.57527267178375	2.58265042785296	0.724115940854736	2.44849782523326	2.57382466946231	3.08092214772842	2.95331974208494	0.614114043131881	0.305996082735795	2.31204318291609	0.682343097580721	0.252731770949575	0.404276673205301	3.08991447916653	0.618891315616976	0.884789502820418
2008026	0	3.30239489403922	0.475829819636521	0.0877715724185811	0.551186758503559	2.50140111462434	0.743471096874759	2.2212749932614	2.46744651000673	3.0143813340864	2.86687600911269	0.558725145809782	0.170802670819091	1.87506562972049	0.59008272393045	0.276020012421034	0.458524256165632	3.15369680660886	1.06758979411016	0.954935432415466
2008026	1	3.30578185788695	0.448653098358645	0.0865868963698185	0.560060118585832	2.37548414578899	0.696249799241336	2.02780181193561	2.34050893274851	2.49116128731411	2.78963967195003	0.560705928019238	0.174198520183674	1.79636233062928	0.791792592047417	0.305692968087713	0.561396740929972	3.20354473590288	1.82976058355087	1.0280092562846
2008026	2	3.34711966140087	0.450711086163748	0.0837241824206214	0.522984349872655	2.31788395508848	0.60855526190044	1.86765420745657	2.24535610813195	1.98863141844401	2.54278310946974	0.583939169498508	0.181248959438843	1.58557323346498	0.769430253112102	0.239424371116382	0.645411843757331	3.37035396269079	1.97746434574505	1.13200441053886
2008026	3	3.41631795547168	0.480185166606117	0.080791456101694	0.470114887756425	2.22576248681988	0.534633910691167	1.6442111104188	2.20687345090715	1.58751221198538	2.18674892406618	0.620936358198345	0.178392241585735	1.56704726484281	0.71655420825133	0.20679929416813	0.687965578264134	3.56508937662779	2.08820567339424	1.30971860823062
2008026	4	3.38389468490568	0.546172816284655	0.0778633023292302	0.44818771814151	2.12754641627363	0.467803971600144	1.22363745367129	2.17658563181615	1.72149681451842	1.21565789412301	0.65195248749576	0.170037136305347	1.27885158165847	0.660197461235986	0.218961602509564	0.683746953634027	3.50870881152769	2.13523787144159	1.55866067437245
2008026	5	3.42746626273976	0.583012287427839	0.0767205721763588	0.436549806236477	2.05765934300944	0.434202639789287	0.621888462342942	2.22630707651459	2.00615928014057	1.01255868979922	0.606355697712329	0.169263303237241	0.685650083437943	0.60369746043336	0.240467336745756	0.645349908245307	3.39047960753033	0.830411080663078	1.82379563507583
2008026	6	3.59719451403938	0.593039451166077	0.0758108869704812	0.441428533047349	2.05356594967451	0.445467825141415	0.541301197605099	2.25604137677429	1.8380387627293	1.23626168292818	0.586320534446711	0.14691681724254	0.272777376195545	0.573466119239826	0.235091123420009	0.608794299687452	3.17774557495998	0.629831373163973	1.98096893981621
2008026	7	3.62259498579705	0.616655555232891	0.0735961102980083	0.438642831777923	2.15147333485663	0.479647355417999	0.672399172995373	2.27091218827038	1.63897404361706	1.52398169965973	0.584268993865488	0.134451817107731	1.28231487861157	0.551062499160829	0.244414656127528	0.566519505773582	2.25815065654102	1.5994749937882	1.95970026259341
2008026	8	3.44625475938008	0.697429371197319	0.0695105090924244	0.445894554454547	2.14333694263093	0.510242766489566	0.724367869835708	1.64753236506669	1.41514040212704	1.46597922915993	0.589092246079912	0.129933732265769	0.989709021971527	0.548744105862742	0.220944756202225	0.526515870723435	1.15351426244612	1.68450637066027	2.07350203817713
2008026	9	3.27491195204449	0.825698507613964	0.0664344621493846	0.484647190670026	1.43043452571172	0.552061776530647	1.09668452126764	2.1577677723243	1.39280885891148	1.75716708840044	0.588993411673951	0.132681291902606	0.698544617685795	0.632510782100065	0.219758690249542	0.524481228156213	0.824264439763433	1.95432779814713	2.29506292127213
2008026	10	2.69693922715889	0.866038293072293	0.073584552973068	0.5813545169414	2.18973160764256	0.664761149087448	0.908961978804791	2.17815047499419	1.32392903540279	1.75519921851535	0.578013987159288	0.137031998636391	0.705473575535454	1.40623838079346	0.223595238899771	0.523304758465391	0.829191558506123	2.21899913361385	2.0130189629537
2008026	11	2.20560733737093	0.827103850068811	0.0941569387397195	0.725370836452865	2.3104724247033	0.767061377438938	0.789580743911054	1.3345808679545	2.15617703628404	1.69479051670719	0.531289800880585	0.182836065076661	0.476284185460419	1.07212160166741	0.179252622229386	0.508125708309947	0.946101460638356	1.59074687308974	1.67351552791712
2008026	12	2.4194350175815	0.810203812357612	0.123900173240844	0.805283012341203	1.45313734044224	0.775879693700114	1.00599401234917	1.24626075057734	1.47829632392047	1.60033373959268	0.47982430144808	0.245448511728356	0.496499535707584	0.643947378314873	0.143400585007864	0.505494055515107	1.62215547941612	1.58817047736607	1.32984715903669
2008026	13	2.45502468832811	0.797181391880564	0.122617625171539	0.834231474786628	1.36051535942295	0.673239946425528	0.71757377619898	1.71498776455922	1.47507108729525	1.97410933458513	0.411699606641917	0.231670889970563	1.00135214639892	0.576348424351297	0.139649624467585	0.493644349859265	1.96865589349599	1.56077889814853	1.22829001711482
2008026	14	2.49577173996092	0.837863437622182	0.124058025416581	0.7939615901875	1.49104483134863	0.578173430724305	1.58816106965429	1.77846695098761	1.17359849708	2.17461804848613	0.338638041000826	0.211567113044285	0.603813307278642	0.584673040947053	0.182104034774961	0.541472360569641	1.74562933482028	1.39372712454523	1.04667303349278
2008026	15	2.41106687844237	0.828194660885512	0.119949508611903	0.339955565358553	1.4500809540072	0.557618695451382	1.84294480623709	1.70111565572489	1.14304393113862	2.21291069737013	0.324128510174916	0.193089785549404	0.941328723307812	0.649397858901195	0.146435820260024	0.599287109600866	1.8491054538721	1.21863476021409	0.879565200872526
2008026	16	1.65164578884164	0.75279601836546	0.116111176739163	0.263738336499411	1.3261974021954	0.526572151938669	1.40503787265652	1.84545980509896	1.79276692322172	2.12154632483688	0.356324204379744	0.179005087965492	1.04110507425234	0.665518104201647	0.174912067400408	0.619840304397683	1.73222370910387	1.53402918531764	0.72934645730813
2008026	17	2.51218150710111	0.798882928751185	0.129135801652561	0.660669910824347	1.4498201487165	0.526294216919407	1.64704163358688	1.96859046022118	1.21751548353135	2.61582856715816	0.434697886736078	0.165304936390668	0.57143547479193	0.612359049556699	0.22520026732638	0.568623019694951	1.45653152757995	1.08513230643422	0.627428382313998
2008026	18	3.03987650869056	1.01454870243271	0.118746995743755	0.81536904414198	1.68213974342065	0.514313053760511	2.46052334550614	1.78627524150733	1.60845901413248	3.3193330379494	0.929539541400311	0.150754139371989	0.788084578535351	0.577102928359647	0.213260050021237	0.467660451335375	1.50761554880201	1.60292567935465	0.566858532452433
2008026	19	3.46137044529339	1.16141450151573	0.106872288224878	0.628619731547934	1.87758845125357	0.441825944910084	2.37813160517712	2.38468516988513	1.72146154313488	2.97091412173415	0.880462314209297	0.139147731384848	0.824540079678952	0.614184342163714	0.202711190716835	0.273491999899016	1.53849695202109	1.54202401017522	0.534013234132332
2008026	20	3.7404402902065	1.16784698378611	0.0944844738119439	0.558484190664181	1.88546076197814	0.373365458954454	2.22484998246925	2.89259635371079	1.23779315510264	3.08317337771043	0.507693507451294	0.129283845960285	0.925309742708546	0.53443268403493	0.221064329295132	0.203995535862195	1.55313315537172	1.33161821408888	0.524758777843693
2008026	21	3.60722534482828	1.42342303287564	0.0830223926062675	0.67725725200879	2.19650710450674	0.401643253412998	2.47648124282963	3.02334344834089	1.33461055444955	3.1743598808105	0.485924672626353	0.114926645480012	0.993915687570314	0.475221474428427	0.214997482160649	0.155349265149913	1.67560112712928	1.36884332000666	0.459751862893985
2008026	22	3.39216329215913	1.36279092727253	0.0719973737084763	1.23249610012855	2.44172790607227	0.593085068463875	2.54296247022927	2.82348639223302	1.37295859384377	3.27088098671027	0.519365661878635	0.102477685658987	1.1336269045441	0.467515951652674	0.337191263283961	0.0935504617143732	0.992084382523808	1.84566408476053	0.305629278887117
2008026	23	3.03868095713549	1.28026715478374	0.0634892245427719	1.50890230988159	2.19706817288796	0.845109338571466	2.56103601863499	2.47547029204307	1.50328703332651	3.17697532214898	0.631222729149688	0.096526870116367	1.1126401026745	0.488660285239202	0.319337474834304	0.0528928274890945	1.14698347951783	2.09000862844868	0.194835584399599
2008027	0	2.75087887165171	1.25864451598398	0.0571629082912644	1.60309796440075	2.22103296643634	0.905033399897062	2.58298028167509	2.20193369293785	1.66624946856373	3.07826557597946	0.807131496091707	0.100905276751789	0.772445035635009	0.431805087453385	0.321825291661595	0.105973488122778	1.35123037744864	2.03764729981244	0.408715749100154
2008027	1	2.40684020655567	1.1729139763805	0.0525660386796762	1.55522627705804	2.12501955500964	0.8485483245328	2.62313249703969	2.21736110170816	1.76405618476619	3.0930242957792	0.901681480580849	0.13396257933919	0.440788109441552	0.395274807812983	0.357452234039512	0.443494794384567	1.20122724455133	1.98188382673839	1.0648181704086
2008027	2	2.10947774233752	1.02214078035003	0.0495877939758564	1.43400704040213	2.02217003376274	0.833258546531304	2.80294117990052	2.38232447838779	1.70269952805703	2.80787289123087	0.951339025619195	0.170838683903388	0.361160729550242	0.431829149817546	0.32411438585863	0.465130168708367	0.980024871265815	1.95430366086498	1.53805807267979
2008027	3	1.80976575905452	0.795260885116607	0.0761143834645024	1.27747123174079	2.15297294183896	0.789569486174562	2.63663209504116	2.32860389677648	1.73865452629317	2.40480411335182	0.955264577460857	0.225907596530789	0.341969971728959	0.453544373973776	0.174399419580608	0.43395876708005	0.919116537608068	1.67954447597381	2.23569514252333
2008027	4	0.945780442211698	0.324994356760665	0.0680125407191116	1.11598019122685	2.16158193882737	0.634366430404996	2.26701280960076	2.19542676234563	1.44963621342718	2.26911648902178	0.982677543009531	0.253800677236962	0.343204245082914	0.683461351633429	0.495909055780897	0.454039965684251	1.40644193035639	1.2412699874981	2.48184062202605
2008027	5	0.577759466259444	0.113313795697941	0.0697684655969055	0.917978903451283	2.15459489562835	0.366616798145385	1.96320401981263	2.03309315390528	1.18991136733552	2.26295358441532	0.996758258739388	0.24913606217678	0.337928357422697	0.859992164663146	0.406004875213748	0.486591935884839	1.6462649033893	1.11830601195141	1.87817591399739
2008027	6	0.393693428462434	0.0370769768825519	0.096999074652643	0.7913020679559	2.12261836603788	0.149018758218705	1.83986330571801	1.87635140612823	1.40750923389674	2.27977239941301	1.00553951939424	0.294731766221054	0.349598503129379	0.810097776968591	0.32832805256651	0.466575792428509	1.41928597091782	1.14806964898907	1.56744564522579
2008027	7	0.264328974926765	0.0237739116241118	0.118929787007952	0.680921155087221	1.94946095494483	0.0386539784592238	1.83188203757124	1.7601564081359	1.40505131525919	2.22692129366883	0.964668198983343	0.385610938814581	0.445588057351435	0.781904838249896	0.28836503392328	0.437127964562042	1.54486213314374	1.18343846544104	1.58372514053147
2008027	8	0.271459009178953	0.0214339674007401	0.156124847167074	0.555257430906476	1.77104805984798	0.0077842865519092	1.83842994099162	1.62835002317651	1.27298184181984	2.11170748477093	0.915001320856153	0.370936491450793	0.631905675289966	0.747485183051241	0.276642341819383	0.388173498006045	1.34263930538701	1.19120025774102	1.63444481807367
2008027	9	0.22013547919925	0.017813905857111	0.284206587155986	0.455196748277091	1.63414237369932	0.00212982570305173	1.88462037533471	1.49338795330755	1.21461347034062	1.9938307344268	0.836364561115862	0.401726227897935	0.856801136870167	0.718221846441329	0.326156492579304	0.328837651066191	1.0446420964217	1.16927920806245	1.63097992835187
2008027	10	0.151163610404939	0.012100131329657	0.321593255325807	0.535629027552453	1.52592359372211	0.00143364909443875	1.91159338477321	1.50776731722232	1.15687231263738	1.7716263283515	0.857029983806849	0.384595171589865	1.28145564931713	0.724396069844221	0.400144272177415	0.26637968907001	0.962969971033827	1.15918601933141	1.58759184267452
2008027	11	0.142887655153262	0.00833940694246238	0.327692314622067	0.705890714396855	1.46508911628056	0.00460586161530519	1.81745846391865	1.55531543869772	1.12277715506656	1.5334098268127	1.05675247838023	0.386855095561516	1.47348460558509	0.713710877669789	0.43930895524771	0.284861930346228	0.901626091269362	1.19501629361171	1.43107094612042
2008027	12	0.181797463138408	0.0189088333693717	0.32455671693418	0.846239210142361	1.44351358201177	0.0132964073660895	1.750542637446	1.53538914079714	1.1042578962743	1.32612032396198	1.01649315858477	0.395577510421142	1.58391671793204	0.709854914549358	0.262786321749522	0.368301958633417	0.915871510504342	1.23754532414381	1.28279051949043
2008027	13	0.546087493962667	0.0935918827163462	0.293377185566169	0.826606151355421	1.43119741998259	0.0208266634022497	1.64792492480984	1.48039400483231	1.08991522937298	1.10093175678207	0.873467687565778	0.398225412542672	1.63311721551227	0.711781451324511	0.190707696477197	0.391619184735988	0.993476366310795	1.25913741406172	1.17797483414795
2008027	14	1.31016674730036	0.147767532382316	0.256427584336042	0.802568838500306	1.43284805276022	0.0234051613530702	1.55134226783832	1.44420783843554	1.10355886726949	0.917102016757504	0.831398077266008	0.40038366978505	1.55348122593001	0.709515108930725	0.250631799795653	0.371557733311915	1.00801519170034	1.26561168610341	1.1232193818678
2008027	15	2.69295176896626	0.138695938128925	0.226026704091498	0.824745763615878	1.42805902085878	0.0364135123272605	1.48285061371245	1.37589625012937	1.14460491420262	0.799489894825745	0.877358105655642	0.420087024805221	1.47597496615695	0.706149344828373	0.35469668356632	0.336784485027702	0.940814441399102	1.23749619633918	1.09050186123804
2008027	16	3.86432676745089	0.211900506380614	0.198587713157005	0.854621043837576	1.43534325343453	0.0693065750494895	1.3755160989487	1.33237546761249	1.17969754972673	0.719291984096712	1.01291317942962	0.457747987098671	1.39612577712991	0.692112398496521	0.333023031681994	0.338931968762555	0.818524261180856	1.21557468152713	1.00978567895123
2008027	17	4.72676327102683	0.304219723971379	0.178171596037255	0.870497798883153	1.44966469256694	0.148524648359116	1.24540652930666	1.31063878013015	1.19441890029903	0.662771268943686	1.15581026661946	0.502928610097423	1.34386463284968	0.665593171456106	0.149741245209841	0.360482653956856	0.777811758851363	1.25423352987791	1.02310258507815
2008027	18	5.3892391489984	0.35820105714037	0.166183270566473	0.846247153981227	1.45833899561772	0.274556288247785	1.11608867119372	1.29278613880097	1.19519660414426	0.622530970132079	1.22687006133012	0.547537945929861	1.27642388062988	0.634485859983664	0.0909173027190714	0.371205371381277	0.812219200693417	1.34633209975868	1.04025841297772
2008027	19	5.63246977876907	0.379804456300359	0.158424085576431	0.827479904102759	1.46498186171507	0.413364881868775	1.00401389760454	1.26169129936805	1.18890129038347	0.56008222568296	1.23132749073422	0.588854427874316	1.27623521137832	0.607845256631883	0.212291156001678	0.384797127792452	1.00075273898882	1.33163202800745	1.07438348113643
2008027	20	5.85443515924469	0.399766019733332	0.152553135828934	0.802747503113128	1.45648672964872	0.466022899828382	0.900261385388462	1.22461427973289	1.17746504549043	0.492598641635808	1.22155205920141	0.63637430097989	1.27765386207309	0.595593750174597	0.348937300088978	0.426774404946814	1.21844494195916	1.316957935686	1.09785507150249
2008027	21	5.96463214531084	0.470439735370666	0.136590786339123	0.773322329810665	1.43750383720685	0.480070004776676	0.812980167909857	1.1792257087749	1.17551185983641	0.44273617789101	1.21694872711423	0.722461829843245	1.39565362979292	0.588138593999859	0.447994414590118	0.475457409653651	1.33795923108846	1.36675957341254	1.05062239843759
2008027	22	5.89906723298992	0.675130941507256	0.125158547756325	0.755536880936268	1.4214456808976	0.454168967396463	0.811767208465061	1.11420942367412	1.17394585258961	0.47302549966966	1.16553967317894	0.817930963717375	1.46761860718102	0.602743361638058	0.424202806763938	0.552943106779822	1.33184567572165	1.37296262016933	0.979607347585779
2008027	23	5.76134484443215	0.982645659576085	0.11640484723234	0.737980391954953	1.40944814155078	0.439675450884561	0.694992519770474	0.973960501511329	1.16656692523608	1.03158420753001	1.04570802549097	0.889110321508116	1.48266677125156	0.746320705995428	0.383495231435856	0.66619943909877	1.28579459275695	1.48048474737853	0.885561273629279
2008028	0	5.39466703805704	1.34655275656135	0.109114527961557	0.72000635840001	1.39522586041985	0.457177692333833	0.554547382079797	0.762418502000861	1.19916150609956	2.28311919150523	0.88066370900798	0.938565678620943	1.51958710271763	0.780592386401232	0.368744163816064	0.760090593450032	1.19917784407692	1.36054544617224	0.779296323964486
2008028	1	4.89477877148497	1.75861410811868	0.102749975237904	0.69557065225103	1.37535326827306	0.449010591336533	0.561782182161673	0.51952684011519	1.32615707275766	4.50052090948083	0.761674573655511	0.969127672601899	1.56978079268186	0.915175336316033	0.379865339502996	0.873209213504325	1.05980357529822	1.23295934928585	0.731973101026039
2008028	2	4.20796022114761	2.01545317103437	0.0984833766336607	0.656513371019881	1.34792817504208	0.414138254675997	0.574648198484046	0.437861076205071	1.37937630181248	5.30085344949175	0.714585763179103	0.967638361879005	1.53435635881349	0.997035687047046	0.374714725281881	0.933454280768332	0.955487220815956	1.25637011465386	0.71590251712944
2008028	3	3.55093196224935	2.13804231797335	0.0965627184355311	0.619497973327169	1.30889540841012	0.366401794760478	0.810738060763772	0.495755474803805	1.31695826703356	4.77541860621649	0.701342078319832	0.942091970388566	1.43847949589257	1.03322137248608	0.346250508222656	1.03691523443476	0.862534648341297	1.26491014881818	0.817303118194944
2008028	4	3.04140088506925	2.03614313662486	0.0978799938671788	0.583908865174001	1.26346006805206	0.307582764575904	2.19174759875136	1.02937925756386	1.04045389782879	3.85871176207068	0.728620184959786	0.925626103997746	1.29836817038324	0.983102562330709	0.382877707915265	1.10224161043704	0.769320856634925	1.10975096528732	0.995867391732643
2008028	5	2.7925299947858	1.75614165869829	0.105364356461261	0.545168193433782	1.17953456258829	0.244108229333721	3.68284117919033	2.25603689576162	0.951964911971513	2.97245770170683	0.695247128140332	0.914505219737189	1.18178078513787	0.888907200220096	0.386427999262977	1.05330669068148	0.720744077024345	0.886390803888566	1.24883058432286
2008028	6	2.72671538842514	1.78558649191664	0.122860063703814	0.585791432881256	1.06853324291497	0.1831356707213	3.7568756558374	3.03921527611122	0.959183843543882	2.26777433669742	0.67188663964684	0.892106466047985	1.08101926752013	0.772912116953894	0.354515210481341	1.03062100582034	0.677116933065229	0.992292677784466	1.47952099690019
2008028	7	2.46808427958552	1.92007287737576	0.150870425072616	0.581230646319806	0.775179541756763	0.135069341175674	3.41253559262405	3.25222071980152	1.66359871456451	1.78687351325383	0.682031148067829	0.878914913186204	1.14970880329244	0.674683626840119	0.306979594693922	1.00583775593544	0.642166579228016	1.84783565561483	1.60174770164277
2008028	8	1.90573277454226	1.88235171770816	0.178997449390585	0.499444413232874	0.641741562665616	0.105323710332377	2.55066038784377	3.16560648001364	3.67528778917558	1.67791554167075	0.735518269169242	0.878345935684349	1.22631506163297	0.613547582204942	0.29480691225891	0.944262440067071	0.621554050528793	3.75052076740742	1.66071342516407
2008028	9	1.40563420369417	1.68756030499906	0.198973116703279	0.407233471396455	0.656070355997774	0.0855793043184822	1.76534961917328	2.79136236350433	3.67788512493995	1.33288005211518	0.996153497230742	0.887934678151679	1.07604457371601	0.591029356714355	0.263253217232315	0.978816679892082	0.62065291873294	3.93519440060154	1.78297840120086
2008028	10	1.09583415568455	1.42353638523363	0.223336562129956	0.32492662738718	1.38551589601691	0.0835101895368818	1.38297814288738	1.99017619562736	3.33691381785732	0.929766953046635	1.36357476661585	0.888420663670395	0.72830060192134	0.584340080096201	0.242422919798049	0.99082594869131	0.645371202636789	3.63504953855628	2.44051697234502
2008028	11	0.914876149004689	1.25534336271604	0.355513050479746	0.275441360069087	2.29858476358729	0.127101766262584	0.879652765210864	1.64584385962039	2.78042986119294	0.775624325186301	1.39833603736921	0.874188056959145	0.386397939719276	0.5676580996497	0.252716714898904	1.00440509329604	0.677200091545279	2.87981825077809	2.20567037337503
2008028	12	0.918559588228417	1.07158811347954	0.639862974801812	0.282701757890911	2.5112994904655	0.363107439291576	0.56584663052079	1.39539013977779	2.09147212535928	0.993356815831033	1.25776670272784	0.855970001342969	0.334211416166674	0.556723072540432	0.269635516640664	1.0262085128621	0.746544788510782	1.78307135492918	1.38655432467953
2008028	13	1.55342415494591	0.914766751339188	0.620489651344946	0.539371874329104	2.32130428527144	0.894450457381222	0.543818627514462	1.21168556773566	1.61541647593243	1.20318973129103	1.01351966765902	0.831956644591666	0.41982948259199	0.557087088841649	0.297320559740324	1.16729275896688	0.910122140423638	1.16392611534128	0.593037915706338
2008028	14	2.06104332942164	0.80554502862313	0.709552117124166	1.13604562538047	1.69599387657202	1.06237112951465	0.635026962545592	0.757703999047689	0.975520140509888	1.55052843463779	0.893126634290241	0.804598767583538	0.252182468708652	0.562197529834544	0.321195765095898	1.19036836828532	1.0877911771855	0.843692482017963	0.161270158510602
2008028	15	2.05733291216746	0.684430070165335	0.711655644256061	1.26591842491695	1.36149414481708	1.01471591956296	0.87725047135172	0.653927966486439	0.446187483447718	1.67314072987276	0.940327576142242	0.807329858468942	0.218111328709093	0.564517955390098	0.275480615369783	1.0954309698156	1.23686086452697	1.01776022524561	0.063832765623813
2008028	16	2.13937599497428	0.610735211898418	0.656010414357822	1.09478624717101	0.783145543377834	0.934037767266238	1.26487422874594	0.722219604662302	0.425481867562578	1.65740295865874	1.16938880387285	0.844464554754662	0.511765053930146	0.563174989339295	0.32661916646705	1.05481148933589	1.17670309195054	1.24780533548022	0.0446023372654577
2008028	17	2.12885376095501	0.606505425705862	0.624956669812638	0.797029609054885	0.600111206450135	0.84128996890927	1.46236892874302	1.29984516542768	0.624747593426506	1.639137981094	1.20964402592531	0.857609284477277	0.860223028147125	0.564090082991292	0.39039153085183	1.05111289376391	0.827493426568738	1.50314950177796	0.0340350379958612
2008028	18	1.95893654529519	0.790183381878732	0.611661253209628	0.603747107894146	0.587743909504413	0.774793211075742	1.44581724031747	1.99351365723416	0.798335435700804	1.61123759321384	0.846779002190373	0.840877157388094	1.17493110531412	0.562691075200936	0.409224166927719	1.00336874693113	0.5689440911535	1.55521341843838	0.0277183586077818
2008028	19	1.86649556195332	1.12643570060555	0.598251576816254	0.556554316757408	0.712509652474724	0.733739826864097	1.37923942622848	1.95665939420862	1.04649693024099	1.71227585567241	0.796457714594244	0.793601371049503	1.43801542163198	0.556773388777169	0.395543420106467	0.941327072961944	0.535845312349159	1.72511268609316	0.0245317762958919
2008028	20	1.86356919568418	1.25866805178815	0.570694433583335	0.548470217322982	1.21407091869939	0.779873190000474	1.52477478666857	1.7764075005023	1.38177008288658	1.96369795396628	1.21474277886307	0.747359412905488	1.55709522654471	0.540757964837396	0.347459450595603	0.873806142217057	0.967847625443486	1.82978004472714	0.0233601045818137
2008028	21	1.83722181521314	1.31600606367636	0.542044731497246	0.576301833811446	1.79049456845612	0.832522261210692	1.64236297026006	1.65300259893715	1.58388760070099	2.19824898928545	1.4591344369746	0.717369445799743	1.62713857086698	0.515253747923763	0.293336862738674	0.80462114412429	0.891899940868399	1.77454031421852	0.0243101866986134
2008028	22	1.81562960701174	1.16653446157105	0.561971898044894	0.667389279458285	1.7105962132196	0.869463055373916	1.78669196936426	1.62284297611991	1.64254214504626	2.51004451678071	1.45788658536295	0.655012140800796	1.70612905899833	0.482773176980164	0.347627959808401	0.709062499840695	0.9499426467374	1.67048790710311	0.0271701597275911
2008028	23	1.85789761584334	1.23154044625778	0.618776281745012	0.953595766120046	1.45871948200781	0.882043982645125	1.97816519264674	1.7083788959047	1.49421592808527	2.83266296975433	1.14957123332451	0.577997263334841	1.60812090223539	0.438500200187051	0.35988508088174	0.641059256087338	0.754660443701087	1.64893579437635	0.0306789429416597
2008029	0	1.97386333876224	1.54983161375654	0.65332157195241	1.46522427051932	1.36003182923938	0.921698086563132	2.31058815466167	1.70576784458477	1.77477190585925	2.96327048735978	0.868972265283754	0.538620904748111	1.73193789960167	0.379161363498951	0.436279362962391	0.593033684804925	0.55098329432898	1.86767579197396	0.0336493776988746
2008029	1	2.09008997919478	1.55332644116582	0.671588679317006	1.75239699961861	1.3928839196518	0.997523473930974	2.57294120888875	1.70843182759162	2.26437846318102	2.89307991964513	0.727020558040212	0.533040032079156	1.56425694809819	0.312914329651794	0.505747080326326	0.550876591982692	0.508200712897467	2.12225622764953	0.0346042590169116
2008029	2	2.29303270253661	1.45689143231983	0.694008085833516	1.87440941538436	1.55006913674273	1.01476432047043	2.63992528691418	1.771304705882	2.50069839863089	2.77607618638482	0.57447080044822	0.502720242353253	1.51053646758018	0.252581922673375	0.550214543082872	0.511664187641635	0.481021466702857	2.303693536574	0.0329510858435714
2008029	3	2.44137532969634	1.31151192295085	0.698396712554148	1.93319952574442	1.64366265880018	0.990360449910312	2.43986065781761	1.79161752513248	2.77175597652942	2.89999395675501	0.46576265972263	0.496214820731191	1.42488565073485	0.218636114671195	0.568154873834925	0.475105294122357	0.477063770702264	2.4476973419808	0.0290633318911202
2008029	4	2.50790785292146	1.2580435445225	0.675157534433847	1.97568419296177	1.64694808715142	0.961246467528778	2.31533139584475	1.78590054639441	2.89694690982422	3.090804919997	0.419024823025086	0.504958472983052	1.17757990583884	0.203664426597421	0.611630637086009	0.437957509454263	0.521478131846831	2.59710378804595	0.0270106245832263
2008029	5	2.5041537784693	1.29027140294146	0.638279751605234	2.05325233145819	1.65860316443691	0.924923631021267	2.31270150402857	1.79626239014338	2.8839882207385	3.04171817452546	0.327870336511703	0.506639633363573	0.818577620709097	0.201786427413544	0.764208012029299	0.395155734075311	0.627254196569963	2.63800384255303	0.034392655250667
2008029	6	2.34639629737848	1.0129127242574	0.625608981471627	2.13757089014404	1.69160102175264	0.885313322351387	2.4093500788368	1.88781489404267	2.60807573750244	2.68188665548061	0.260552244254881	0.557535720134779	0.921834133163795	0.216056298593993	0.765114408804619	0.35363906473879	0.793234308875098	2.56832686074754	0.0556254645285534
2008029	7	2.17295426172397	0.845049684833346	0.659561957613271	2.16151504874721	1.79043591288436	0.848297739385999	2.30916027449555	2.02666468063439	2.4814922947093	2.19762135990395	0.287231357180484	0.695903424105675	1.22160255924179	0.222989401290367	0.717229408901027	0.313961664693798	0.963993328387621	2.4529694512309	0.157236030837267
2008029	8	1.93279213629593	0.795080332555018	0.713317744128346	2.08740834851467	1.91028758276203	0.81518538811946	2.07817481030358	2.13172587152806	2.51255329005072	1.87192641978041	0.48320316499176	0.873521319598351	1.10199004872439	0.21922233920156	0.588965185777999	0.278297930802558	1.11335305109961	2.42665953642652	0.398314782440746
2008029	9	1.74907598295874	0.72381473863611	0.763116623946806	1.85769226440399	1.97620849751339	0.891401433563498	1.75573305867519	2.19090145261324	2.53447098761316	1.80147505630248	0.871722988875753	0.805894893181684	0.844214535955645	0.250555596020753	0.527078058060445	0.240511329787537	1.30848654240251	2.27849312649817	0.615871745880891
2008029	10	1.66738807119271	0.659252986278394	0.789805791963808	1.71300403191423	2.02353295938149	1.06396886830727	1.63781771955205	2.15446792002209	2.31819222221488	1.71914839180855	1.13031261661825	0.6568707193429	0.575623661997222	0.40367802850594	0.524595877395181	0.229554806978157	1.50971228244593	2.1774290313875	0.797109437187129
2008029	11	1.62959428191127	0.58946490942929	0.854111997794324	1.59767703222879	2.0621832655464	0.882989727194332	1.44948725070984	1.95935991697121	1.82598270778101	1.55457908044595	1.30974224392847	0.51735016375603	0.440831057336464	0.413143651906623	0.543722900135625	0.307870850614019	1.68904170655776	2.09778050725831	0.826993380941504
2008029	12	1.66183976776685	0.544543107908946	0.881949066835532	1.50079736298147	1.97202939119413	0.802551885075007	1.22432482311489	1.4864929633681	1.5921868841599	1.49162674719478	1.36404101145945	0.461775399311024	0.241224317041625	0.410702521942244	0.510170254076702	0.427721818223673	1.77660164517597	1.65958404135347	0.854714457881788
2008029	13	1.72907694733004	0.54488728039346	0.893998690765198	1.40769609064519	1.76628051969536	0.815269700208435	1.14655408224101	1.16009786396807	1.39098562344435	1.53718198323358	1.31405642704151	0.372169438879981	0.246997588795061	0.407355355981564	0.485326836082821	0.471352090036214	1.94128356166544	1.48001169670462	0.910486744648117
2008029	14	1.76911756458309	0.600027699488368	0.938147787819802	1.31113657112403	1.47555440755981	0.854965120740744	1.16430835291517	1.02933243777575	1.19274821944938	1.65716595245368	1.25366490798785	0.291019237703819	0.318198544774077	0.414261467603882	0.461516378883006	0.687168127648181	2.12846752339147	1.36395579460066	1.01835405540927
2008029	15	1.79375857822184	0.629069720097363	0.88039180077535	1.21302746706519	1.30841075277937	0.89315884242681	1.21347536166919	0.982508116900828	1.14160467000368	1.82684037617065	1.22618636597266	0.289013995514624	0.298949882664603	0.409814117788076	0.44319431016594	0.735762731316425	2.20639188710363	1.30490708606955	0.895914150348119
2008029	16	1.87999234067875	0.602015748968171	0.816671631533028	1.12933307417402	1.1908155139212	0.897518379058696	1.33223523655633	0.973965925456124	1.17578798759817	2.03262839312705	1.22016391582774	0.369469076724719	0.283551042450077	0.386331970707907	0.426479561144603	0.701873065191109	2.21302622016016	1.42778783955329	0.804515537380891
2008029	17	2.15376991631969	0.53607580846664	0.76333738732959	1.05303932898124	1.07487356598128	0.871882966665232	1.4349348578731	1.00348508197761	1.25556581180752	2.14413748620138	1.1320802246212	0.566355036351319	0.330971172235235	0.372243426024735	0.411755216835522	0.674898418037038	2.1939946966831	1.58740391104317	0.715925843418962
2008029	18	2.30246279351257	0.480854791684546	0.713808026885167	0.954907185242932	0.95626871934478	0.843162967774814	1.45457375412124	1.04242068872684	1.37807118978342	1.72460653040683	0.849942941631915	0.731944618301003	0.372602975264327	0.360344194690616	0.401815738631413	0.661156352181561	2.20024286656147	1.84930184111105	0.620580587949245
2008029	19	2.32634198108716	0.456577070087412	0.660274933606737	0.836311832068178	0.825155366281264	0.825750738419043	1.44618102153502	1.0118830900351	1.50771445356688	0.638625660119563	0.650741134545692	0.684995700315865	0.397571565772907	0.344223164276494	0.403789688383357	0.663998407069463	2.08077015206757	1.85091944447867	0.558439491947636
2008029	20	2.35503918890738	0.455372927137294	0.612541438632092	0.702348426992798	0.733341499651985	0.820455996160201	1.23071494990572	0.846301692224812	1.56025132027543	0.198060856959792	0.605606708424488	0.622588917251063	0.419035761610934	0.321523105705697	0.416035661308252	0.67307549172291	1.81459655599384	1.54381609185914	0.453996003226959
2008029	21	2.34703507791486	0.470639273655594	0.576363200840506	0.577520895697735	0.769084047442951	0.820701629947346	0.816856943759284	0.726236824627108	1.60354402006611	0.102993322744369	0.604301250195933	0.568968620959921	0.471538487825411	0.300766864639709	0.424621723179325	0.665883729225534	1.5844225988813	1.00022004408967	0.357940950601424
2008029	22	2.31051183883768	0.661548019076879	0.545672801077757	0.498516404537127	0.93387535668303	0.81134046545603	0.553096063802562	0.688139394399302	1.58556468814779	0.244899092200824	0.635176902736292	0.581556317224069	0.572926999773236	0.291910172045245	0.423094161983722	0.650703391232036	1.44878614578292	0.84021406976543	0.322979053162617
2008029	23	2.2760056128798	0.825509644350778	0.559192180903707	0.489272907173848	0.927930862485228	0.780172791412728	0.348882424697233	0.684055252937776	1.24527461120768	0.898534178666514	0.760719716413962	0.598145479901501	0.707741459406746	0.289725833821459	0.423154573733263	0.637044238114354	1.27641647748619	0.576524044754995	0.358013226322697
2008030	0	1.90554148050658	0.954447123385725	0.538774051303012	0.540131987640683	0.776045351611074	0.690648102612701	0.184381725812971	0.686628371541654	0.928157607814753	1.46579078361956	0.862446362181753	0.513447527812903	0.833627218597298	0.298609419418011	0.46117086493163	0.62111375165214	1.09748044505142	0.411621045507128	0.420147802916732
2008030	1	1.29607562925393	0.97390444845778	0.435121015767133	0.61385972383487	0.662273852019858	0.591602493719234	0.147249122705474	0.670571499231565	0.686086316925336	1.07972084570513	0.861156940885664	0.384146970160493	0.954066197813079	0.318859117752068	0.54756548807374	0.601604730699659	0.950174251839821	0.443494338881272	0.502337015341649
2008030	2	0.589389776584809	0.936159900414745	0.329517295366047	0.676855771633723	0.609304032226596	0.544068042191523	0.227870731869138	0.648366082139491	0.322641663234099	0.721203059187131	0.79960422083467	0.357366859292286	1.04200150201943	0.355463235461638	0.642575821162431	0.568765261599425	0.841416161075479	0.559676588339911	0.5950153415785
2008030	3	0.348240155121242	0.876554264191025	0.243171125728879	0.72858864550739	0.565370734283597	0.532929663412488	0.217384446654652	0.61291960033602	0.124481290009081	0.995093846846694	0.631472403042999	0.477644257639731	1.08179607111263	0.405040183293018	0.712310676755128	0.497760578598832	0.748185124712196	0.624663756896509	0.614589276048971
2008030	4	0.794245144919201	0.810206544630336	0.174718259849637	0.773313151137046	0.528945688642056	0.539095928071103	0.24699885535183	0.567780092529825	0.063128687658539	1.01607321966644	0.573965095901255	0.589661108096194	1.08859521329967	0.449632641163964	0.73358917497719	0.401188699879282	0.644612928500875	0.618227623322188	0.663661204807361
2008030	5	0.929891252439641	0.729159171486991	0.127453060241943	0.81916839346955	0.485736144791709	0.553591238447198	0.320158522168342	0.426718058201466	0.393985315560417	0.989507823618824	0.557671089021226	0.551305029108869	1.13127634734056	0.481046839224653	0.702387595268394	0.317075945047835	0.521737127951673	0.529336732472959	0.644669690031652
2008030	6	0.979716191061651	0.644062846391264	0.0993877670605486	0.924858417814646	0.426322951558067	0.560421251387157	0.49481237848265	0.317593445226497	0.739502514710244	1.23472621776112	0.549795914679694	0.422089903755846	1.14494765685908	0.500848219269472	0.62467030325299	0.300491992141305	0.453564109763095	0.441317752733621	0.515937651826208
2008030	7	1.62361721988305	0.579062169883649	0.0848803418711582	0.933441639398419	0.371925192694747	0.553463883102182	0.514209031394031	0.166355767142245	0.746805874353235	1.38650384381027	0.551190417616779	0.357843575643226	1.1492859198918	0.505882748243524	0.514883897837135	0.303286056779035	0.519053764531663	0.437719356721503	0.108581155895401
2008030	8	1.72493035387216	0.561418872533319	0.0791937183530458	0.930624880301862	0.329507281393089	0.551625856395105	0.546367720135811	0.0726567439208736	0.730672429279844	1.56680666645927	0.527602124659682	0.372923193368415	1.2604498416664	0.503448517038806	0.424099427374307	0.30569619337903	0.614829805558768	0.440298367167584	0.235822543440968
2008030	9	1.70609666492823	0.577492416128662	0.161938012036485	0.834487285079823	0.279884119081818	0.654694072961729	0.776897524441423	0.181526115575606	0.758032643084694	1.9803278447714	0.535829544031937	0.452254460482918	1.42604020802736	0.503764367070986	0.373955658821037	0.294859199259573	0.648610435470556	0.510939559759571	0.599718822599851
2008030	10	1.87812113937911	0.558257612297628	0.151095504823613	0.797253787206313	0.207636013920871	0.628538725237679	1.17331021649013	0.327076986719956	0.760964126660713	2.06078125524442	0.512557400719298	0.52610061596058	1.79222952100257	0.508267747498428	0.33208474670769	0.271803790672442	0.654695579537116	0.595981476244982	0.720895133162554
2008030	11	2.22681236617279	0.452095965966576	0.129660288541827	0.673975870652856	0.0633802888692753	0.693444875529514	1.68005270650551	0.403601738295923	0.730959906576506	1.8695157538187	0.47999287624061	0.581110425439249	1.29733584826297	0.508827954253998	0.297845878682226	0.248579962070857	0.667428967243195	0.760167211069736	0.918173278798358
2008030	12	2.22075182435562	0.262096829799196	0.12052655053582	0.547561644474779	0.116581496832855	0.593728362628953	1.71557908231549	0.496135473315176	0.602988029389597	1.58271874979442	0.43512918198228	0.654624548000032	0.931581919060917	0.50632869138337	0.255244910345812	0.23686449680924	0.662968777175573	0.696309800800358	1.22449726914724
2008030	13	1.88030640083942	0.168379489702943	0.140540512225048	0.49621140151446	0.439630820303757	0.519374985316425	1.54265728067923	0.591876189556364	0.603639389083321	0.976720434726795	0.406435920146239	0.71010922989512	1.09766219339542	0.503009833885409	0.21574480680263	0.23381282600871	0.665333370421412	0.686261801607828	1.36300188013017
2008030	14	1.38563024311582	0.2919390606117	0.164536610066762	0.367604894214591	0.50003181651005	0.51998817132725	1.07566953926341	0.965893936222768	0.98289788721321	0.888809404735927	0.401141681040522	0.75562848895981	1.05359024094902	0.522498630135619	0.185536935072708	0.230247964994545	0.67800793940816	0.943732666351907	1.26534084210537
2008030	15	0.784879779761984	0.331462900357622	0.173120748391595	0.153293969676263	0.556267239933036	0.54333937487292	0.621693602237903	1.4597698093415	1.41080931614942	1.64104207730571	0.378675832487555	0.799354417581269	0.785976715816115	0.523059711602728	0.171030062112617	0.236287495510565	0.700171478348515	1.29635330812016	1.12921540918734
2008030	16	0.959534219801524	0.354302243571869	0.163502292293899	0.124502004524257	0.545585583329572	0.492791044925143	0.967613714843232	1.48800686787076	1.22355122845734	1.45152679084909	0.380573727790163	0.778193276179525	0.624805252360716	0.535577896244569	0.167068234971987	0.219309475009131	0.684823205604006	1.1921170342645	1.04963233558194
2008030	17	1.81285705715773	0.49529850493354	0.161690175105006	0.185035694625566	0.58748629530544	0.282405515642525	1.17597461052727	1.34850841074293	0.804047365872141	0.928187055636975	0.354790331270207	0.720920911637248	0.606529814214796	0.55715271139663	0.158245205285937	0.212497152629616	0.416595682941588	1.00036375941643	0.887509658074285
2008030	18	1.86892974423616	1.01948465372611	0.161350160355354	0.308284561083298	0.963735878371412	0.139219484881986	0.960040068053318	1.00560569943948	0.984359075591835	0.97423233384731	0.345202468121421	0.662639400616094	0.497908604726061	0.581417947931876	0.148330994717406	0.214053643559656	0.242038871432448	1.14035262762457	0.924520204110654
2008030	19	1.85532232940236	1.52847420996699	0.164277079184839	0.350464133495193	1.11278795479664	0.193232767204507	0.78188286815716	0.624177066824546	1.20109710609474	1.63335089547519	0.35250049085796	0.600815266813749	0.528956229237675	0.606779782973977	0.141439997183284	0.239550454246901	0.371237199706055	1.17111941269788	0.928198530410021
2008030	20	1.79313382086639	1.50723002086995	0.162713166362993	0.460401505976065	1.01824035492659	0.258283387565557	1.28406296101815	0.932981885745951	1.07557031628928	1.4806056791312	0.349182106333107	0.580922909606709	1.13073795595105	0.633108440849527	0.132350624754174	0.279868035097255	0.541967135783313	1.05439706344291	0.879967426049642
2008030	21	1.49694146660574	1.34719683623747	0.158651064171803	0.834556162450262	0.744801321955353	0.269524059074557	1.28134228550586	1.27304122552395	1.02353630859234	1.24733143955685	0.325340087006405	0.580592838073248	1.44976049870692	0.645831466181157	0.126029397528347	0.299113924461706	0.592042571938452	0.969394336669258	0.803320211776098
2008030	22	1.21812437102582	1.00174148870693	0.150524904767232	1.24540199345386	0.709547201563638	0.363880574904836	1.20871005121144	1.10668597873812	1.13724710582176	1.1395495762894	0.29056795784074	0.550092916848392	1.44714121669828	0.649230755451352	0.119636429661222	0.287767398646522	0.606854282351621	0.8632122685733	0.760589031335461
2008030	23	1.19719165130542	0.753813561069195	0.164285824893631	1.3098000788147	0.984681369520777	0.810453040095805	1.08945219171023	1.25465522703756	1.1066460731117	1.2286261710373	0.2644232718361	0.513405009519793	1.34103744938943	0.655633825013662	0.109809008383693	0.222126459777811	0.602261350867535	0.856343605450221	0.735982983289483
2008031	0	1.28320153758673	0.69794486817358	0.191214993154804	0.869743978788149	0.864995974394244	1.26294799745891	1.01186120723719	1.28937407900325	1.25744901246134	1.42960514035013	0.261841820104452	0.471984957003251	1.23559454771907	0.659819121665241	0.108962650887067	0.156889830929412	0.587083119148502	1.26374785091414	0.69547192447582
2008031	1	1.41586307598944	0.650639608325355	0.204908478519665	0.565935174751268	0.749939392788535	1.29550453961454	1.01269815357156	1.21411920766813	1.21069099497749	1.44617369458271	0.277408458499565	0.441720567369323	1.22722029339325	0.740373068334162	0.116851483384482	0.245343677787792	0.580504382120853	1.41390785041223	0.585218374703152
2008031	2	1.40200390470318	0.629356537837738	0.23579854817505	0.59702892558325	0.954405653366008	1.12660703969326	1.14431293955877	1.06151741492551	1.13291425150107	1.37962180467899	0.296519080789455	0.40576098293711	1.1833145552842	0.98430831157284	0.113806372599717	0.246420772104774	0.626135235895767	1.23553323278073	0.468454765658867
2008031	3	1.35761036859366	0.62511526242205	0.277488020602195	0.627036395416953	1.09946145144383	0.956814961086422	1.22534997019562	0.906022054168174	1.08751753248478	1.29837675027722	0.340808898122136	0.389568377158452	1.0444223768467	0.937103121968415	0.117585259804201	0.386259137775606	0.757625186196758	1.16170061115603	0.379832566967204
2008031	4	1.36458692558759	0.637989700074139	0.335506010862468	0.700330284777012	1.03628638642533	0.85895665625596	1.16035850359741	0.765694007250307	1.13236796824611	1.23207568623078	0.523278892767413	0.377586213694868	0.956911707973772	0.907476513033681	0.137108908126241	0.598740364969302	0.784113096597454	1.1755418634004	0.290014897804274
2008031	5	1.40731022368865	0.635674054220946	0.398893262386347	0.796711156842475	0.93047277814096	0.772327405612398	1.08332464569447	0.713152711897415	1.19797341194164	1.26336534297321	0.685380397724609	0.369080680817893	1.05241067066263	0.853993398199027	0.170720346706051	0.712731227921138	0.742247763735836	1.22861869173549	0.250729540199335
2008031	6	1.4499889623589	0.62549049165439	0.446419365771132	0.817548316357092	0.812537853450599	0.707048370807873	0.980439666984747	0.639796536628988	1.21854973870328	1.33551417372266	0.727425340462588	0.39910056705316	1.25728219610809	0.794128950564131	0.210459507896903	0.777771294514209	0.690983570878993	1.29725091037943	0.256657679388392
2008031	7	1.41987205862425	0.643933543252278	0.481731117502099	0.795716534639676	0.722129914370574	0.680035489074081	0.924704460685655	0.555276060989019	1.26003844711063	1.3414081125193	0.764843475398263	0.46838677087838	1.33603861042833	0.742265216681468	0.235341687703316	0.872630797918312	0.648762422972432	1.31153817815048	0.307676511773691
2008031	8	1.2723051962197	0.659046847599127	0.512730474165773	0.728144961618632	0.588488338486302	0.688221434131698	0.880824846654051	0.579603189988178	1.20996849474521	1.44915321586585	0.792563263970874	0.573076597630803	1.3864392368885	0.701749698816474	0.342537654841546	0.894693275445495	0.666012835196067	1.30098950723596	0.31868450819145
2008031	9	1.16152279587766	0.587068598241627	0.528105369925904	0.711095333857183	0.547448874873761	0.71809949629642	0.775938808336646	0.56788126747483	1.23005503807127	1.58073612765533	0.82726795160326	0.623836491599992	1.68580389915898	0.653966411584199	0.401905090409201	0.847032278513539	0.807131582079811	1.29274928890686	0.336604634836719
2008031	10	1.09664239143794	0.47413018091596	0.493581156204567	0.711344577154885	0.588496049756725	0.778373430201496	0.542522729992026	0.474209100784873	1.12343070319642	1.43186465518268	0.840687177344706	0.602099657360668	2.29740168170875	0.51037380442831	0.397412919849242	0.810000915499862	0.941825026322857	1.3499213211272	0.462401452243749
2008031	11	1.17207760849098	0.418227753176069	0.413298560951613	0.680283067144756	0.521164189839961	0.756947941336557	0.463179496716407	0.394851622950177	0.781782975690409	1.25826258863246	0.864527411737595	0.569423182430229	2.5223350324599	0.354592339790553	0.344728261430992	0.805224330240043	0.999111520251663	1.16780627698749	0.500861039698445
2008031	12	1.28750347910647	0.397567305690902	0.349555651018884	0.613691873142088	0.474893269595661	0.72326990968931	0.452582867879017	0.348558096309441	0.77436760061803	1.30697711936592	0.851060738483858	0.442176148359382	2.39226485218384	0.858282414414644	0.317576735403166	0.806668369375126	0.953679950446384	0.979502815116724	0.324143572230971
2008031	13	1.58367329588717	0.308378700479349	0.300838566283429	0.580725297506833	0.416454009365499	0.6232061637033	0.477209736894258	0.338545383242752	0.782592702268176	1.4377727657105	0.782505683864604	0.340767143463015	2.43841040420076	0.843199333976842	0.311700785234009	0.815294779250964	0.739812253734579	0.999946671998576	0.326506868115354
2008031	14	1.74883616892113	0.243168979583345	0.283046007485767	0.514306817515694	0.375455758285215	0.552937139450198	0.438210592563762	0.341841910739565	0.829415581602113	1.60669014914182	0.791787937758041	0.254178774550236	2.51048956078865	0.784184847686842	0.309849803779549	0.832060878255907	0.680622172666198	1.03275042919849	0.355070475413366
2008031	15	1.82681370369268	0.187874892023719	0.277839427497287	0.379020443287512	0.373296568246599	0.505043795371107	0.530451306705151	0.340400357867314	0.871571044120862	1.85766984661725	0.904324229329234	0.364164794683677	2.40742537271732	0.65511540815705	0.311671564489905	0.885638259599782	0.659791679219289	1.16414841845571	0.26643168718636
2008031	16	1.76890119039262	0.149730253543526	0.272001706781786	0.325130125335363	0.344591733009681	0.441643054096788	0.618927741278681	0.329706106810392	0.997701591755079	1.69620377300908	1.03350569291295	0.614829053450235	1.79224059337176	0.592516168720976	0.316176117619894	0.927306415007099	0.581185042681675	1.32648965150262	0.116498372919721
2008031	17	1.61698002516797	0.130236464526149	0.273321925907732	0.292399265440059	0.273601286529408	0.410018757513808	0.73263160880666	0.322100349981056	1.05014476832077	1.07309530952908	1.16618403719494	0.644301795577755	1.14960115662353	0.579848201896362	0.341755493179231	0.970456020878437	0.487380754293305	1.44960720458228	0.0512241340660262
2008031	18	1.827996930888	0.13524917637802	0.265107784884109	0.254964535661509	0.214306361126922	0.399159153979975	0.721354313051289	0.325598453410867	1.05811875699287	1.16275807849761	1.24148686314007	0.64555098067247	0.956265386256956	0.637339151231474	0.386243265496023	0.984356798128664	0.456810866448837	1.41600107214045	0.29925634501335
2008031	19	2.22080040371696	0.152963408508104	0.262481847647895	0.230774737304365	0.190707961708561	0.378340889956694	0.886662080828013	0.333108415893189	0.992199300150451	1.13903661123228	1.26235136387195	0.628584693019999	1.33351020699597	0.70393097664082	0.422981891194884	0.862435371394942	0.43326976897525	1.32853801143201	0.949579217121581
2008031	20	2.20914509939835	0.13651431932423	0.273674295746866	0.204744297100475	0.180342050893113	0.297624488072373	1.04935558865775	0.303579286182105	0.940518346841314	1.37099450813013	1.31688356953342	0.596062776270102	1.67735303851735	0.756251285390259	0.462329794449567	0.576562999846453	0.420308883153651	1.26449045610037	1.03089121730814
2008031	21	2.32543368423779	0.103786387623499	0.301549193198315	0.174449220160992	0.181915061370641	0.251078371701434	0.996203217924003	0.299865120489939	1.22126027626096	2.18499582400862	1.33791917108099	0.556970187588325	1.38265311615823	0.823776425909256	0.475010976903005	0.213043531820558	0.395632331048304	1.43240166501504	1.03923505407756
2008031	22	2.6956042210195	0.0738856344310579	0.307622998501719	0.140727128581655	0.180354278399159	0.275584183912152	1.535886466092	0.863955964962949	1.57766743609801	2.54480093889184	1.33917512766611	0.509323257169378	0.775420065367375	0.678956852998674	0.454612824599546	0.141583026254011	0.407804283832366	1.61968766282103	0.964061094475788
2008031	23	3.2807798268027	0.0675919006003746	0.302800038451571	0.0889400084191856	0.177146679751075	0.210225412614498	1.84030568516335	1.29874746324962	1.59854697392426	2.83043675218732	1.38473386064555	0.467588290323291	0.807501356937714	0.440369931899462	0.446898271056742	0.142622166914	0.473016378443921	1.45757900550482	0.865659115430821
2008032	0	3.39914685706163	0.0971556341630267	0.32614007534879	0.0639921327034238	0.361304626839843	0.168908568783119	2.1892979120987	1.16251390281296	1.76845021788487	3.13468303498737	1.49051996056615	0.445898156775492	1.1105348776455	0.403966194506921	0.417122129214917	0.137621261675779	0.460869105341826	1.9481244238287	0.764020107348572
2008032	1	3.70013462129506	0.112318909799127	0.321255176931083	0.0564363363630053	0.612380258245445	0.143416447598846	2.35170852092633	0.851829500006374	2.13951217112093	3.32146622782746	1.55143303995944	0.447359587392186	1.40489445370408	0.642550184017637	0.358524953301486	0.131110088182107	0.360670826123915	2.26450769222956	0.757873146892281
2008032	2	3.58004151939244	0.134828997272478	0.304939535858051	0.0555063472938557	0.570891710695256	0.108258648215123	2.68008163155832	0.892113810815744	2.57734771623979	3.06812437963237	1.6595184936016	0.468877135237123	1.13260118246592	0.634951850249807	0.346329105174184	0.137269653861172	0.274999279664266	2.50259577553109	0.754905942970072
2008032	3	3.37375426028595	0.205173334513351	0.274944493717028	0.0454794446192663	0.535285645756818	0.0719398554814231	2.61084792706855	0.815154763453534	2.8432822886898	2.6287710527014	1.76490543007161	0.504541632018	1.0992322742416	0.300018049886467	0.360446387666129	0.13608314429413	0.23297206146814	2.68960430226313	0.753744801933047
2008032	4	3.48788769039298	0.290471915421857	0.222848185499474	0.0435559275324224	0.472807693453148	0.0488241330767044	2.32986530036903	0.76135458251058	2.8787297187438	1.83593542103198	1.9079672596667	0.588513705029412	0.78802308072393	0.233771820781977	0.30731662941932	0.134667971433703	0.210739499591196	2.99973765441069	0.76641366654506
2008032	5	3.65029791532713	0.312599922943979	0.164696068305425	0.0737509418482527	0.416685691421877	0.0413231931017639	2.01182969151343	0.836851624762836	2.67531503653805	1.4990746893142	1.93991944139313	0.614118501029509	1.32586918934999	0.966234737598275	0.210863355716538	0.136273149637819	0.208596455466926	2.52034029302421	0.727651325980084
2008032	6	2.30015911734542	0.334726232050295	0.147330919810307	0.148089118387858	0.406536788133358	0.0382147087173485	1.24405516715829	0.860822923860636	2.27276125709109	2.96752892663347	2.02574735484697	0.579120792254467	1.25324121154844	1.10004769997512	0.1696313087798	0.143224146205948	0.225974022025451	2.56906245192463	0.66756890629907
2008032	7	1.93673533935486	0.297133970966231	0.140739057668006	0.21267919452807	0.404876611089151	0.035873953944791	0.867133987893076	0.829304616061569	1.94956821473797	3.83228046645803	1.78764734612957	0.55953962824245	1.28040261956562	1.05615593884896	0.141781428503131	0.142885689835698	0.176590386700451	2.34052696788005	0.678830094109608
2008032	8	2.03159701578526	0.264628724945403	0.120589530644532	0.276125979262131	0.392149589804406	0.0516931833850779	0.84669688191823	0.87826706116954	1.82958627443254	3.40877449413246	0.988992959280404	0.504913270440722	1.12338261562468	0.890303983423402	0.116750213632034	0.132372049721044	0.178282731666577	1.77745418801895	0.824606267858645
2008032	9	3.64795699281281	0.277150954003872	0.0931940185784729	0.278593335585003	0.378568440690807	0.0760216372019978	0.892319859888969	1.36991642934814	1.53063687181125	1.42595362065709	1.22467779556276	0.434059781500732	1.06843193735493	0.536284843266176	0.0895246020675865	0.120561155986085	0.255440900351042	1.30430110555971	1.01268162976953
2008032	10	4.18698142218869	0.312290182442375	0.0840992802301764	0.243639349147242	0.379466654235543	0.0998312068210942	0.601884235290678	1.7123143734347	1.03165184880589	1.41747783375174	1.40680560893198	0.408077310627349	0.920673136795035	0.863461789618904	0.0678315543478792	0.107190102457872	0.253541644035713	1.14572165284749	1.29029006368088
2008032	11	4.30305159701179	0.306745748615289	0.0918420344458407	0.250581954848386	0.453776265668916	0.128411192862992	0.720775069635739	1.75309776602719	0.872647145032165	1.4908557533743	1.43299866032734	0.403566456506102	0.49531100351218	1.0949839247551	0.0541844683194428	0.0924665381192932	0.271579659713555	1.22198363014197	1.41221375826634
2008032	12	4.38331331701513	0.310744783991463	0.0760952036815156	0.26706537662606	0.592602796898055	0.178655609234765	0.90118597632228	2.09520890884456	0.758217577003348	2.36814541277302	1.37960576705295	0.388060776311095	0.238506910606017	1.3855384777654	0.04745357401872	0.0787646910686344	0.304804152587687	0.999392152515589	1.45319300709456
2008032	13	4.32402589460258	0.349397888850766	0.0872482191432071	0.228349841889174	0.734283123212783	0.19313656495367	0.822984922027177	2.35531607942344	1.34848901203759	2.39363842960665	1.29174176683494	0.380278541388003	0.138152592396167	1.37349161625016	0.0426072701111246	0.0680692802580866	0.30273173729197	0.979044195226668	1.45274277265585
2008032	14	4.30819107169344	0.414903319839347	0.193713449491168	0.213716230322449	0.871922060303101	0.213561978369083	1.30513477122831	2.4546911062859	1.98281453046997	1.7032128105336	1.2831545349714	0.376517365613496	0.136978663036207	1.33036590033675	0.0360805993038039	0.0589825414881589	0.298990131850897	1.24192205517416	1.41856293931294
2008032	15	3.99659745782995	0.401679619617116	0.251055650600558	0.247953131476246	0.892083100632213	0.242670564991381	1.33280383539907	2.38678984436947	2.28051042778326	0.9609863624811	1.30286322098089	0.384472714352326	0.175288220877156	1.15299594117836	0.0315393916163258	0.0534513010396998	0.305306626306923	1.51260280216225	1.37427181585483
2008032	16	2.771009585636	0.348349332025453	0.274589038534216	0.253205282438308	0.79610392476605	0.234215537773865	0.923454315469869	2.11541105383056	2.43728075053644	1.51556105515056	1.29087151686463	0.381614843199726	0.231043019205756	0.864851036115528	0.0320378986124336	0.0457157883510484	0.304314212572784	1.44093250463203	1.15997151680636
2008032	17	1.91195896474611	0.283073390824903	0.364679510924416	0.227299592452006	0.741253606149379	0.208236773603143	1.0745269362617	1.81522140236607	2.17508187605788	1.85088371063619	1.31138697537351	0.364422363738025	0.329990925603372	0.638881468148273	0.0281519227606209	0.0393811208916789	0.323231089892135	0.980297614450822	1.53022562534979
2008032	18	2.07027221865343	0.317336353101159	0.27247543274627	0.219764630529048	0.690887709613823	0.19565060594252	1.43924209764869	1.58889194648196	1.74330685228461	1.63206342170806	1.3939372375431	0.349254307702593	0.454417149214518	0.472198116726072	0.0236233263308359	0.035101249345106	0.324620827603651	0.994024378757722	1.31098977779395
2008032	19	2.27746422696502	0.3676283243044	0.18175783798731	0.219970680315711	0.698092612230703	0.191378898732509	1.34984697622099	1.30706388404194	1.70650753131181	1.79853365797858	1.34922256421227	0.330039798857128	0.504029712827072	0.338020543167243	0.0191704414736731	0.0191199620725334	0.333376185180843	1.88193313089007	2.82238666107636
2008032	20	1.61773577116441	0.396299582161351	0.0843849367148054	0.21815666096452	0.716603049094427	0.169707207466902	1.11882144428216	1.19253165809425	1.66086513063411	2.664124573343	1.38136860983656	0.319022679117859	0.510826353579998	0.257738825000689	0.0168533541070936	0.010546698040687	0.345172440536165	1.86877044223395	2.89093515590049
2008032	21	3.59492983048523	0.391509862371814	0.0241144847465037	0.247830833929452	0.679500170686955	0.156887262777735	1.74154938691073	1.06912576539419	1.55181566073708	2.25757631341641	0.978738688349538	0.322266730962401	0.454024721571971	0.205451097814575	0.0162295966345857	0.012389879769994	0.351889212290389	1.57759184805922	2.99222886560468
2008032	22	2.02638884736868	0.482735125880273	0.028817350492527	0.274746088392801	0.621429469671809	0.15151485471829	1.68358388095268	0.976799655504868	1.4025408097008	2.62122937189901	1.25573933413949	0.33137285963514	0.589023415685817	0.173444099974335	0.0180366522009601	0.0298076253240887	0.339419266498162	1.53475176257651	3.17931925623109
2008032	23	3.45769061094168	0.544180315753853	0.139166511179314	0.268213420354026	0.618736373686669	0.182241431883771	1.72188304559026	0.822596428498874	1.53169922172898	3.94092655715674	1.69151929334573	0.326299096706835	0.726865251666108	0.15815374790208	0.0207878422656433	0.0316549042138366	0.316257062045994	1.36019338411345	3.36796046399594
2008033	0	6.00693003930221	0.496048629099856	0.323467783421963	0.280507719680149	0.604142570608271	0.23334066653948	2.65030032440305	1.28237229610465	1.31568889014368	4.78011978184913	1.49546488233688	0.323564290956531	0.743744224128776	0.195749000595061	0.0225821328366691	0.0141319779655901	0.309280036235348	1.29249411400414	3.10187895194351
2008033	1	5.59184678923053	0.400838334814814	0.482619310687428	0.314480546179234	0.582003473082044	0.253474826563517	3.78297050075967	1.27400431148723	1.68081361876749	4.74396787933149	1.7662102016921	0.333258303979405	0.767575810403483	0.384743971397935	0.0226401064056751	0.0117513117972151	0.325664616633452	1.35195772693061	3.21938286893696
2008033	2	5.53121681862345	1.4006493381265	0.614541975223801	0.305145271335785	0.603752762098999	0.277237409686161	3.94747487940023	3.53219060011327	1.98586680604252	4.39162808161287	1.75551503800104	0.346084893122309	0.878415767719266	0.554092579678626	0.0201464507714303	0.123212901862416	0.353136344389496	1.31384994942023	2.73862162247944
2008033	3	5.65983111403668	1.22359585164062	0.620437763283458	0.259443450344659	0.959874191536361	0.301618949680665	3.67791254241354	3.7562244852581	2.31599285849492	3.74153221989489	1.79783215168989	0.326083440137722	0.995758834486218	0.809905284111272	0.0189250543145899	0.158473824638479	0.401287101988188	1.30576856651274	2.32916969122846
2008033	4	3.93266208191214	0.80153296714718	0.603600256201406	0.382277697490199	2.71354838872286	0.454929058112425	3.36153530641636	3.84617068096944	2.57331386649835	3.25712212612651	1.77085123984819	0.332135964991413	0.969495611974065	0.836195851610343	0.0175557407655544	0.270428847957489	0.39567512135297	1.47078470690846	2.0661371980546
2008033	5	1.46979438883435	0.777072510665308	0.520673526571395	0.657822275949847	3.06764176176137	0.709338370794218	2.93600759793757	3.63374981266043	2.50179804444446	3.01801688499241	1.70783565425815	0.366402490531474	0.966216920775207	0.81741271190047	0.0147120130187523	0.353269611458058	0.423409784536028	1.81154150181363	1.72717066521777
2008033	6	2.63034179101606	0.80670066358805	0.33979847586358	1.21265645669578	3.24686397152083	0.714208414786111	2.83846967136515	2.92626664694885	2.29330516311804	2.0147250842387	1.6768598037021	0.375186435935309	1.0264584385211	0.872327048392618	0.0135758900178718	0.37742648493148	0.570136382561677	2.00268256676873	1.58725702265804
2008033	7	5.11102183343112	1.26298809729293	0.269533747834766	1.68674750687548	2.96707484835658	0.677435975574047	1.6800840436464	2.24876292895646	2.28182977310933	2.51890814050487	1.67857935129172	0.388925665282294	1.15845870596099	1.00134782204234	0.0133696587536535	0.224772095235162	0.798980137414617	2.10011617051196	1.53878888962935
2008033	8	4.12027170648722	1.88317344448552	0.243577805846219	1.85370772258053	2.52945495319511	0.996868301362261	1.98143645164643	0.902976723678647	2.09359570855305	4.60547695092829	1.64668751060066	0.417065162532665	1.18746467183096	1.25034635027521	0.0166878764159603	0.267709538941579	1.82816387601479	2.13104033843571	1.48828398166932
2008033	9	3.59711549414633	1.87200499070129	0.25781936797947	1.6535990836949	1.6782587035124	1.09342577328539	3.83347606632532	1.15436370832093	2.45188745667875	4.03728212702336	1.5440279222921	0.453367032905737	1.09855871799489	1.54484577254048	0.0348808645259411	0.508570103747341	2.92302381840727	2.24389318433248	1.58113647236615
2008033	10	2.88596309347583	1.67836106294803	0.299699402648551	0.887818189843512	0.546108922244902	1.07377719679523	3.55127848175915	1.73209980700074	3.12452474423186	3.27629970237748	1.35511252370059	0.492214168383924	1.2736836219709	1.60831003199014	0.0606131797271752	0.43591856921854	2.78266976730404	2.54055324952288	1.61473250161097
2008033	11	3.71007954607225	1.37226195528617	0.312354525801786	0.894469808046976	1.30391726602761	1.03782589262377	2.74560798888949	3.1164413290666	3.56053676398063	2.36680266341614	1.14274003749863	0.524821455449787	1.46623350847496	1.50088770871889	0.0802974227671122	0.359998979354227	2.36857438978079	2.6477244634339	1.59843797681484
2008033	12	3.60446208107957	1.31190723025894	0.388101415727712	1.49417458913747	1.51084923853869	0.945341569904993	2.0622330179937	2.57608868202509	3.52313936532962	2.00619287407309	1.05954004621362	0.538398058103305	1.51283663579279	1.23396356994959	0.128812306567081	0.550312856749186	2.17261153467166	2.68169244088842	1.53016909878521
2008033	13	3.19298095193908	1.34768283499362	0.531430350545537	1.04935512407731	2.67334453757069	0.593391353170608	1.86594060327278	2.78885833000488	3.15307142595634	2.67150085031009	1.06302571292907	0.533047038975054	1.06160002731427	0.783632631040555	0.233858054789662	0.527435405852777	1.92157143862729	2.66927837094315	1.59330392656364
2008033	14	2.51133494103525	1.28054537569102	0.53364510827559	0.591716926215538	2.44888271813148	0.695400561529239	2.0001854104733	2.51657673814998	1.99099305954732	3.07045298511357	0.695282649894275	0.511658079769848	0.895491071897421	0.452073652229082	0.256062297180491	0.538744722483193	1.08537136082716	2.07130982455454	1.79034928803815
2008033	15	2.45880126148715	1.19085865546593	0.508406957847356	0.595920701654387	2.56505458946363	0.743075043302593	2.42057674410985	1.78942205377108	1.89498719368525	2.80754198475577	0.551427405122266	0.515545301634945	0.854498248151304	0.469718065514956	0.230528970887184	0.477212407139375	0.823707852938877	2.02587352551794	1.68510898897863
2008033	16	3.32149854525842	0.868580657772156	0.503656648637417	1.36133494736988	1.97093033309247	0.466676613652083	2.27405026582976	1.95762439410179	2.40039998392417	2.67719691005439	0.454167867777826	0.561894511401457	0.84314024848255	0.380500125973227	0.195250267656715	0.394221413590011	1.98619210685814	2.29023526437213	1.22426503207096
2008033	17	2.5553137541685	0.639079974002757	0.485401301014517	1.26165945742483	1.52965092618739	0.313832961638014	2.04607204297994	1.92587358495628	2.55034148658948	2.08519162547532	0.411128826369865	0.631743606631701	0.916706309350021	0.33330710805266	0.172724097120816	0.270885378431233	2.45569838260856	2.34958736859319	0.765395352451391
2008033	18	1.62110110135878	0.542655258658715	0.469534126915333	0.922026162157741	1.64563554610998	0.384275850424573	1.62455107150751	1.84671235896291	2.47712040645717	2.21763023084731	0.487727374495548	0.650316064886521	1.40564039299182	0.434233070272984	0.155334327352243	0.268819664748386	2.2915990494028	2.18401425379785	0.561898175112014
2008033	19	1.6180221407661	0.68462062887246	0.450847673813036	0.56126861585615	1.73821230089718	0.478212966048616	1.72795731662583	2.42959568744713	2.41238692486797	2.02608266753581	0.545407195150941	0.673178754989233	1.71600320462692	0.49671147027683	0.167546504861878	0.252555959812444	1.86781465459086	2.00223839875646	0.518415391980242
2008033	20	2.00517805719253	0.652165713829555	0.432796091762113	0.420355614330634	1.60581626952496	0.447915128258653	1.71114197796015	2.34334460959399	2.2561650100847	1.76619765059507	0.615417288417237	0.749756967308162	1.71743323102109	0.698523051453783	0.271969124180803	0.20000075720248	1.64868519347739	2.14409314167045	0.513259385784528
2008033	21	1.92097851646732	0.460968626075532	0.40624424452696	0.398268547789729	1.73191851822101	0.393295586162633	1.49206565766305	1.72722050780499	1.88523749178342	1.67888583742773	0.519155538670751	0.849351059167956	1.60615420953416	0.969726267207518	0.288152688156581	0.144578071497513	1.73224120370406	2.43337192175178	0.528002470351911
2008033	22	1.81565549685831	0.408418714692605	0.371480292801058	0.317524713125356	2.01521923835919	0.288511305313382	1.39952014688584	0.98577901710851	1.58482557309581	1.77513379649754	0.562233538067396	0.749971471690335	1.47219587826417	0.953827117976835	0.326670346161488	0.1168917765118	1.91968401179095	2.28455947032723	0.60818397216125
2008033	23	1.86120286526597	0.42954052394591	0.319850345228815	0.289059437872157	1.6028453724233	0.223063331210012	1.36126476450004	0.788285605213019	1.63551243777676	1.81488046809134	0.677022152593809	0.651560034249192	1.26650400094744	0.81683039444346	0.238619450438313	0.103689319663388	1.88466862429787	1.07455139625319	0.672470078940115
2008034	0	2.06135895230354	0.508135197729109	0.268823287203877	0.336534641557731	1.18726804098628	0.219585700033625	1.39058658949505	1.15747974066934	1.63217212187653	1.7396783762662	0.903976723806614	0.684562609923352	1.07567475963583	0.830267290988768	0.263376100093994	0.101090225386835	1.80888467821584	0.473944719637126	0.677711591681491
2008034	1	2.09123608382569	0.592802475477308	0.231027477271243	0.38741971843213	1.03054434095196	0.221251011109278	1.41371389627206	1.05665780860231	1.82981451043846	1.74422733859041	1.07536830627875	0.630958793009732	0.922817993224653	1.01752500298507	0.350821673711657	0.102756095930498	1.54221099199208	1.42326541649766	0.627378928226161
2008034	2	1.56210197000705	0.60609989029226	0.214267781028735	0.391362174566418	0.904528520703839	0.213384136658703	1.44485901415032	0.845914569164468	1.77025722535758	1.67468698190403	0.695476087091563	0.488982948441068	0.659219394523352	1.21392308777258	0.330258620966271	0.115257469207558	1.43788055898911	1.97944277720225	0.569357929868863
2008034	3	1.50398556042418	0.569428011654585	0.210690254206594	0.382773643268625	0.818592287111936	0.203109795061646	1.47164014214868	0.785037103123893	1.62891944430744	1.48729864546292	0.741017071640652	0.327159256665774	0.381125135057711	1.1755609271939	0.33094965691705	0.145320770451059	1.7078868321349	1.73535751434125	0.512702318850668
2008034	4	1.71043554381865	0.471094563520374	0.204413507961909	0.337514388514944	0.724214196330637	0.193324444192983	1.31327322763581	0.763037375493133	1.61549137084702	1.59647994450965	1.20459669249731	0.225892358856426	0.337260737897973	1.02506962080441	0.384346815094962	0.152825545672123	1.38861055868447	1.63280100797299	0.466418795071506
2008034	5	1.9022866482209	0.362280585954105	0.190805421419426	0.299533645201694	0.696397665331509	0.184765238243407	1.04816069996005	0.655343336018728	1.64390048006773	1.85456454411457	1.38708339272514	0.230493362405416	0.337675097402491	0.882340543754404	0.410124958321877	0.136442465122648	1.22286469816028	1.60094813576341	0.434584807818732
2008034	6	1.795202776994	0.320291938556928	0.17487653850614	0.298930579524285	0.707727341335033	0.178295933216134	0.975447633077364	0.612986871277837	1.54731410739664	1.79355721832009	1.26272022082091	0.283505726097698	0.372153475779266	0.77148326236384	0.195361549798704	0.12023095995067	1.22422838765487	1.54529618412988	0.392494124930039
2008034	7	1.66507814364784	0.303728387559608	0.161115114533889	0.296654065942924	0.693299097229882	0.172502009387254	1.37318884938411	0.583902718792693	1.30563699591695	1.63924200914219	1.19177871503282	0.396045417982808	0.38873364705889	0.702432181163638	0.108983292467179	0.104804832705556	1.24971468225996	1.49777488222843	0.326556679729798
2008034	8	1.56830423987731	0.288845578646348	0.171539951716081	0.278219589450584	0.670371587810122	0.164519865984245	1.35791520991498	0.615083036482321	1.31706223132287	1.47423596225964	1.26751443707146	0.547599607503657	0.392098597784087	0.6741136449178	0.101381434252193	0.11232936408027	1.25286515158631	1.54765329795442	0.313462085096748
2008034	9	1.45785311171533	0.34945887999326	0.179183680362023	0.250593681554546	0.712244023429919	0.173309688078577	1.228635794379	0.751405048902168	1.49968070011353	1.35815224103213	1.28213602909811	0.483112577536381	0.423098530025186	0.654693673004737	0.127025727074158	0.137741873119035	1.17129023875759	1.66927625984037	0.338494924098663
2008034	10	1.43717834475312	0.437237967680415	0.168179890339379	0.288140226935021	0.773634951277023	0.167789800777181	1.1272836567999	0.853151792862932	1.56408136731669	1.38993180814617	1.31724441490967	0.399239596572079	0.716618349360617	0.644577897037257	0.149005661112257	0.179079609328325	1.03847484872021	1.6615743595034	0.29375964701152
2008034	11	1.3594609786282	0.364558842023296	0.153448804813255	0.305226350020735	0.815560152824254	0.133542298747288	1.09438415174831	0.908485475093378	1.42434947120617	1.53717097445767	1.5019056589052	0.498549244346934	1.84831267986552	0.638284495227097	0.187951683258476	0.18133228955012	0.903264348109105	1.52769434024324	0.265401528902211
2008034	12	1.12780149273892	0.279612270246088	0.166829793771464	0.33093523354944	0.832571111790749	0.117622335137659	1.00194954514443	0.813756929269965	1.32129880186655	1.45645270768854	1.70500443994161	0.44568939954971	1.82843720515553	0.634198699509874	0.216952070377565	0.197095017005585	0.848127371339211	1.36905248808378	0.278025222416798
2008034	13	0.922325694348947	0.19769186961438	0.158576728568951	0.253762394857892	0.75599178184079	0.140714269284541	0.83373422474717	0.822111743555196	1.14824637372871	1.21647518456043	1.81070360967278	0.293925263414717	1.37828432310302	0.630970492546114	0.238142125692585	0.217156564241151	0.862657226647559	1.28475051121391	0.250761505754548
2008034	14	1.00816643726163	0.183337771190136	0.162833611096185	0.163839769486649	0.631318281637557	0.169467339416958	0.769937549356702	1.01181207041354	1.05359888923222	1.01491353481642	1.88008552429098	0.248665648842957	1.19518892793356	0.860675555386479	0.265714290266932	0.228067975698546	0.837553579052576	1.25761251333431	0.230122483088319
2008034	15	1.0661743460967	0.200230113737841	0.15609232650464	0.148767490676103	0.511609267921992	0.164858090394855	0.712735445383561	1.08466438766589	1.06069420063406	0.72202315793634	1.7818657795046	0.242863441558857	1.23488567571283	0.829860304700377	0.245360739426906	0.230759561495092	0.783428632447095	1.15337542858162	0.192413880022092
2008034	16	1.03167872694121	0.165885129041264	0.145031271426459	0.149523285069793	0.307332431820659	0.146151787388751	0.603222396490147	0.636758135739637	1.07797419212491	0.526222236087451	1.55787051409011	0.279974750894857	1.3201195537916	0.768613361112864	0.237129446455716	0.229070202498702	0.707000161248835	1.05595239159178	0.146756172983992
2008034	17	0.482642075100313	0.11868041209972	0.134108458622795	0.141783234691753	0.191607504811948	0.12048314065444	0.688515271630962	0.27493097026297	0.997594785182575	0.501121240745101	1.29981362882974	0.343319751516716	1.36430024500374	0.719790779689977	0.271644044270962	0.22161309101713	0.580447987601483	1.0806278502376	0.125666496465375
2008034	18	0.31862676495815	0.138661867079722	0.126652179470977	0.121969760463823	0.148113784052375	0.112989525110696	0.791080657885745	0.197032687776469	0.943342031114248	0.685832623304439	1.16756968410887	0.69351113410879	1.45051849293488	0.676499238750099	0.360851896803692	0.210425026701499	0.378015070231331	1.08773026753008	0.0996779153653117
2008034	19	0.324295987904085	0.130467096955569	0.119902071912138	0.106435083930319	0.14595310568259	0.106058892123068	0.71052337932289	0.232433442311158	1.06598702525157	0.606983804482811	0.940720578898671	0.802253909735012	1.39193690146825	0.64042693797542	0.444716318363838	0.149674295752185	0.229086938322783	1.03846959751457	0.0879213726366061
2008034	20	0.338302678861925	0.120122629023826	0.116853401176046	0.112121524554218	0.123397744474819	0.103915806877341	0.310616475477093	0.274200489317274	1.15563487291724	0.237880197505347	0.710541356835551	0.869741678750594	1.08862053338933	0.61555622826566	0.367004433442145	0.113298012549067	0.20076823144053	1.04279450901782	0.0927435420590003
2008034	21	0.303188068188798	0.104206776920432	0.119510521183776	0.118945685813977	0.103247798052944	0.0970044428508489	0.180955955282115	0.242215689715269	0.573442862831394	0.163167671545569	0.640125490859037	0.949298967871421	0.694826020858311	0.594583842286485	0.136553459984977	0.119544936534532	0.316601237625683	1.2390740763498	0.0933313016682578
2008034	22	0.330631641619417	0.0877689635049472	0.12829056420162	0.135917108477508	0.122104567238846	0.0872440072448644	0.176402654036637	0.206436883943296	0.332850376349381	0.236031945455827	0.749784520378183	1.07498884191237	0.819789361702566	0.571962964335139	0.11316586025912	0.145181282432235	0.360932627813496	1.03617475061218	0.0761339022853248
2008034	23	0.415444042766906	0.0800725498182922	0.133429638317847	0.148115977061126	0.152403133225118	0.0817507113653319	0.205079558578113	0.196483388081586	0.372319566593681	0.234825205283216	1.22252922855553	1.27296036450098	0.932821451943954	0.551218661360677	0.110186495058922	0.121876495941992	0.294114787918108	0.4033280542431	0.0568915124779958
2008035	0	0.469481725364081	0.0776792513908089	0.134742511693198	0.149416752901088	0.170159547081098	0.0808774334548517	0.216048562320347	0.184333017099938	0.461980200822102	0.157786473473395	1.25529990800044	1.50106046881506	0.686032739227534	0.549894538002492	0.112821365235808	0.102737451283739	0.29832756676108	0.363183752614425	0.0447284180439496
2008035	1	0.479535127984695	0.0766684082962523	0.125745746981372	0.150255479724039	0.160961144504068	0.0867599096441865	0.201355214143095	0.192018867281141	0.482444490215276	0.126977295809341	1.11192941882066	1.53003992311091	0.440995773505932	0.638157430201751	0.13644457648711	0.0872041031116839	0.313232744372602	0.393852863625238	0.0349353306089807
2008035	2	0.482742388608023	0.0761265999850418	0.11125545863592	0.14946866140724	0.150595589366354	0.0957252323200229	0.167442998864382	0.197248269516885	0.46170770600079	0.120868455162918	1.0135443964724	1.26850793965006	0.393214120135881	0.728531750792151	0.166327928765983	0.0796080147199132	0.340823921146499	0.400582746992678	0.0332437308180767
2008035	3	0.474066006674938	0.0758626817391111	0.0945500622635091	0.143481879246925	0.144697514941423	0.1089466533297	0.13315118282813	0.191878051396784	0.493881249054719	0.116167225420207	1.22694148705398	0.915167830879172	0.384451450201671	0.710217597520544	0.157926671866988	0.0791935898276913	0.334265723487674	0.439090798487959	0.034578115932801
2008035	4	0.45561250341004	0.0757373915163397	0.0784230502056331	0.135197735435915	0.139593650218684	0.127658041724945	0.119682790484609	0.179345434810395	0.527952555554353	0.10822216987179	1.27876683404339	0.633623419668642	0.427791175565595	0.66583453509624	0.123206507574057	0.0779061071965083	0.277481689151528	0.540483795766187	0.0265631666847266
2008035	5	0.440339204549097	0.0778592989305483	0.0683691123216813	0.127921219465954	0.138430809685112	0.143073741915818	0.114742197665648	0.161061180755791	0.525917579042892	0.103538258263133	1.36870126996608	0.535342080877847	0.4368800286976	0.619084906245571	0.0878323378580643	0.0714273785949892	0.228391746514475	0.601446291981655	0.0187841448941538
2008035	6	0.424865417143985	0.0922700776088134	0.0619401110248162	0.122787618566244	0.143859281611933	0.147728676354915	0.113641509059261	0.143467054942089	0.513125416489201	0.111419574738413	1.44667336509046	0.655681134210132	0.416932246640431	0.574722623611979	0.0755699831944497	0.0602141663759138	0.20700212287339	0.580470907716707	0.00980795060511424
2008035	7	0.405639636758541	0.105623391985013	0.0586822084289681	0.117690734115978	0.155457487663912	0.147447179365828	0.123014622271368	0.148982010018486	0.517502223185438	0.11559824741632	1.51122998716204	0.497838901750269	0.383824152959854	0.488921472070237	0.0713804567190076	0.0477726415075968	0.206610898266932	0.523947346361174	0.00524302074988065
2008035	8	0.400289580653889	0.129958376700092	0.0549710352855061	0.112024487708969	0.162938726030631	0.146849015257621	0.12439177228915	0.164732987323919	0.559797341615015	0.115021304012248	1.30856495550252	0.438480480184279	0.36366263754145	0.485481589943019	0.0632353393927131	0.0392290423676402	0.221219352623116	0.500059183228153	0.00445487135030499
2008035	9	0.397780370284141	0.147784845868685	0.0464956846950797	0.108079662894413	0.159497562724263	0.16421667879874	0.121206040176334	0.189947441705095	0.551464110044438	0.11969511865756	0.895108564477094	0.41134993000763	0.345485869262578	0.505739273514316	0.0536878114783317	0.0341566715932495	0.209819275272642	0.491818106092656	0.00453502067188878
2008035	10	0.385238024482772	0.159607608071929	0.0495206688589096	0.112123900031748	0.143177421003585	0.165228986557783	0.116544452165099	0.203982352255978	0.524867111076124	0.13059713657035	0.889284735348078	0.566142223571204	0.351243415227871	0.366738410743167	0.0486808466729468	0.0307158278141247	0.164301347184431	0.460068161102667	0.00528012307806293
2008035	11	0.346057746940783	0.16102633135917	0.0803868335354656	0.105050519124425	0.125125336091773	0.151850598154157	0.123509869010752	0.201597518789145	0.500796536027521	0.132186456838989	1.06263438402528	0.903819263436718	0.355962454933328	0.307540674266355	0.0456317068717121	0.0269474163835878	0.120581454661061	0.411662606158737	0.00675164145047261
2008035	12	0.310104241820846	0.159982590547166	0.092499677328088	0.0975146364824173	0.107254258464662	0.130905381022079	0.140088770708064	0.189845155652444	0.4802722554787	0.136439102537739	1.12272515181502	0.960708854433958	0.347567778462911	0.273340796660439	0.0434264926844111	0.0205572354633075	0.0940381890112044	0.368738344496538	0.0413168431052834
2008035	13	0.311738265672797	0.160233565673731	0.0860742355340868	0.0873089210860564	0.0965651363346132	0.107751274005	0.150078880070153	0.181231775860324	0.449238911154969	0.140031035818991	1.09491419841963	0.999055710736124	0.337341451687533	0.255081118079467	0.0403233578016586	0.0154400004794509	0.0787085433589202	0.31990178252795	0.209416480016247
2008035	14	0.340256211303308	0.155595107092388	0.072254002963619	0.0779955397853438	0.0911052143156372	0.098767216227307	0.148067491757206	0.174997588998128	0.424902330535559	0.132160751501332	1.02778812303631	1.06581539770718	0.35633875545816	0.244893303474926	0.0391160601563068	0.0129700995594104	0.0631699019340775	0.287514672478994	0.311720243589275
2008035	15	0.36386980220613	0.132376995544515	0.0625035867039979	0.0733715821396258	0.0915387435419212	0.107921471163503	0.142418324274223	0.166118343181431	0.399067456721356	0.124642071429149	0.845253774137529	1.09648026469231	0.374594304200186	0.234807131693406	0.0400573615326815	0.0123440808401213	0.0511718227532448	0.272672053129673	0.509722510572368
2008035	16	0.393704070402263	0.081808888277432	0.0589274622359625	0.0696339850813498	0.0963929292360687	0.112241427170584	0.135980949846335	0.153906390198324	0.366103677922068	0.122989321113355	0.638909157666287	1.03745525861265	0.42252299185233	0.219910648859056	0.0335843015435547	0.0114778236310366	0.0437692553275384	0.264142347274852	0.491928170110728
2008035	17	0.463755293198228	0.0428571477960326	0.0504790070308683	0.0636555131080368	0.103706639890358	0.102701782199892	0.132766268252454	0.1389603125104	0.317081058461337	0.125403423228262	0.507748262736124	0.899477910649131	0.468030735932302	0.199719643841141	0.029995491803071	0.00828026129159753	0.0389576248414486	0.246761388327527	0.314799662505966
2008035	18	0.544800248942312	0.0313827699785347	0.0713373613500644	0.0578960049197162	0.110056600781597	0.0732176363143695	0.124154127970731	0.121115778974942	0.291661664953304	0.146722142455718	0.434878560879785	0.78394520461908	0.484406761127291	0.180774761493744	0.027420134050021	0.00567707694217425	0.0342342255043282	0.237021018214714	0.17166234326529
2008035	19	1.08602120018368	0.0258171317965641	0.0842161923028893	0.056205303222956	0.107649800411007	0.0978194613624052	0.108449634100663	0.0665993816312592	0.269228926345098	0.236730499628918	0.432010538938453	0.652895305514202	0.476287109950989	0.167706583621431	0.029361444507204	0.00750357065349197	0.0288065808372756	0.23442905013993	0.175550257017118
2008035	20	1.26601130823663	0.036684012733563	0.08743120159006	0.0984764135985809	0.11002615335829	0.10409438115843	0.0935344744923729	0.0249188163705326	0.243580263680704	0.320077323813229	0.413941182333372	0.467536525835062	0.465282618140811	0.15797087530085	0.0334181520736168	0.0111374236275487	0.0246460396476872	0.227820317308865	0.218223511116437
2008035	21	1.38562087003357	0.0378590357348498	0.0897107141910801	0.075244655119056	0.110785899929371	0.0890738244400062	0.092259768735996	0.0264960457961179	0.214150799868909	0.315582515358751	0.394296756104496	0.294189771063551	0.426700100759391	0.150734426229029	0.0352042231427454	0.0149799240766504	0.0219081915392304	0.2301864569575	0.214959213095147
2008035	22	1.47272825916019	0.0420706852951118	0.0938584258953149	0.0335475658581744	0.0521749272109286	0.0546065986458111	0.21035517353335	0.232290926864765	0.190221317135181	0.651488161736342	0.381254571196881	0.227539020018075	0.391452802942372	0.148487876938756	0.0368869850751068	0.018950501486288	0.0195898123345785	0.253907047671637	0.361187784890393
2008035	23	1.48985373058833	0.0478910734928494	0.0997814071435951	0.0385567802230432	0.0305224976781193	0.0364174578612735	0.248939594813351	0.671877613915867	0.158252897612808	0.913068185858043	0.362041317120991	0.199296660701028	0.375464027057665	0.150606711970087	0.0266771177420925	0.0316298735254147	0.0180349780153173	0.269772212398871	0.387217487199262
2008036	0	1.42086289387008	0.0535447137765626	0.106999346418458	0.0450053241117107	0.0599777093643363	0.0315269310445951	0.369166282054118	0.707930006781342	0.146049068594969	0.921756362583256	0.335467018847575	0.175968070509413	0.376947639553922	0.153523433157596	0.0142897017134653	0.0717966339254907	0.0169618233573504	0.248517436861842	0.252120105013591
2008036	1	1.09797435719292	0.0624944102515669	0.307443597649797	0.058692073524018	0.167722116353459	0.0395422369052873	0.615863981627472	0.505083808728	0.454594128346126	0.86226084081347	0.333726236809029	0.169382893562635	0.387619651753235	0.156568274619738	0.00975461162169436	0.104877098325678	0.017811587350481	0.213627288845384	0.18624762062629
2008036	2	0.657872847598094	0.0637207774269715	0.444641658172176	0.077127036840005	0.212564846205718	0.0541826660199613	0.748568372604339	0.273622073286482	0.855521889763935	0.923869414605582	0.356202643629776	0.178499935056891	0.411665463669103	0.159595134700364	0.0087630125770003	0.114440393118957	0.0259630524869689	0.429237433963985	0.203124891503036
2008036	3	0.575282413696099	0.0802115389364946	0.435065611106855	0.0869030395613268	0.232512464614076	0.0975150711763736	0.847282244711965	0.201246141877354	0.955400481928633	0.999789977729186	0.389430899361952	0.188435265188171	0.473494162959111	0.16055420874547	0.0087956198904613	0.11290416649966	0.0392341785528153	0.861717576555919	0.239052030505111
2008036	4	0.677433566184821	0.12329506715032	0.392946909811736	0.0914091948199722	0.218641531847261	0.102419351978506	0.928000295991324	0.167974645510765	0.96941610118951	0.865257070455293	0.416052161553109	0.185707716003531	0.591429422392302	0.159048431393983	0.00897135161596849	0.106622264407291	0.0488277774717541	0.955407432216337	0.219141744706685
2008036	5	0.736717148798402	0.203520275642921	0.325323419330127	0.10347138725914	0.184772595204532	0.0951385646762532	0.879195133575558	0.144235499910202	1.07862568615015	0.738877281375632	0.411029328965681	0.177814714182644	0.671517629519619	0.155695322660949	0.00894244423190841	0.122280818105108	0.056079787632034	0.909899167728954	0.241683348466465
2008036	6	0.675088531222573	0.221168134444881	0.251007807549425	0.12876738816157	0.161737821351193	0.110497196585852	0.539138361763145	0.150012444583417	1.05094387138305	0.529169703339978	0.359786504949985	0.17053608911762	0.774728742753899	0.15085498001153	0.00837224936769925	0.127765540145963	0.0515612899186987	0.822001434727452	0.282842334492291
2008036	7	0.600526485391666	0.255774243223383	0.201640361114934	0.103291103168437	0.129495431348461	0.198164944390803	0.255926757311339	0.213327943034927	0.6374411412379	0.362539196819044	0.253683402336584	0.164011543789546	0.981468394127774	0.145446622013852	0.00785096412851125	0.130054975159211	0.0611746810941194	0.924273558750789	0.248919476554438
2008036	8	0.584512449111582	0.297656822274682	0.194526771249509	0.0816287358163512	0.103008954329994	0.26649112164279	0.267688178861971	0.197868856738062	0.29608306078255	0.275647501045088	0.237579428499212	0.160482781568932	0.991726471348605	0.139346517489536	0.00868499460690315	0.163706866076072	0.123534822201455	0.936669171948257	0.225317066390229
2008036	9	0.646699196649173	0.292947010500513	0.233296756783447	0.118959821620215	0.0974363350442943	0.28770601885309	0.298779934469872	0.169795236512683	0.209737304739016	0.254446781528559	0.220653117501819	0.159269218603838	0.91624964324917	0.131803965373268	0.0314247201855438	0.147257859067816	0.205675994777944	0.639954139586962	0.0479846948450402
2008036	10	0.962469588257638	0.250470698709858	0.281073171421475	0.211781728153099	0.12531191902705	0.302203621657022	0.164096210605191	0.209640854454825	0.249315666403355	0.235166193634622	0.182937815892285	0.155085765501203	0.722212979170574	0.124754310981595	0.0426346197663513	0.150041401323292	0.310194437224544	0.290489599914103	0.021426963945895
2008036	11	0.867112807337791	0.19832162641593	0.347927989576681	0.249529775270311	0.184137124949955	0.312594038443322	0.143613812622601	0.247223934670359	0.320752274208045	0.256335453465751	0.164727065528497	0.150604633975803	0.474448590991333	0.193901648397855	0.0463268842135331	0.175422702722523	0.379250509602952	0.305511505354369	0.0309515821816005
2008036	12	0.349815647437114	0.186843943724794	0.322130531634004	0.274012407309299	0.210435745748464	0.270960943086583	0.171521814341982	0.278707015303726	0.30396373329928	0.274320051538657	0.192961903256737	0.146293906380092	0.353725773287471	0.36780434695108	0.0443055554829209	0.212267992017023	0.301681288665256	0.417990324846775	0.114913027628268
2008036	13	0.313888463976106	0.244824464203396	0.314873569916528	0.256074152472635	0.230003594096079	0.219629233489927	0.242092071127959	0.321708305558291	0.261346087569747	0.286511819745251	0.183261045914371	0.143687914569112	0.324238230524497	0.48529600940081	0.0468178692861123	0.241047607482763	0.207920034617317	0.439563585765927	0.629662725777432
2008036	14	0.60482862163104	0.323027161747052	0.279921807285489	0.212571124083708	0.220567911230612	0.19188546678901	0.231365557152222	0.324383064766694	0.305304450094301	0.131995006075695	0.110828562498513	0.146257940805595	0.262673818761507	0.535069323942932	0.0911011647147225	0.237325247184045	0.170009661022135	0.362128814465293	0.689970853010047
2008036	15	1.00922522228567	0.209089948436895	0.350223807597181	0.168446710954365	0.181148477090602	0.189338863805279	0.079744841128217	0.316152355335158	0.401563255067985	0.0557690629397095	0.0607752920722362	0.150130084571474	0.252211440380966	0.544382287957142	0.148880619844765	0.230029142775504	0.150845825507946	0.307625012073344	0.563657699286069
2008036	16	1.0447365760278	0.144576620174111	0.415070207825508	0.159284395722528	0.169135903086897	0.197883990901272	0.024927366232941	0.156874158893891	0.453695401809221	0.0958025128193581	0.0486732006075377	0.14746758588843	0.260450147408158	0.539715881304142	0.199572987201487	0.222830458348486	0.103858611905327	0.318509649329252	0.807194091275607
2008036	17	1.44589241254075	0.080177574831748	0.410923254642102	0.143823746665852	0.177550714970021	0.20143736889551	0.0197337304746656	0.116371184626915	0.496090167112315	0.10923070054408	0.045726338735718	0.142888737720899	0.281104352041903	0.507230849262434	0.22030080423462	0.216163681041615	0.0536162512654421	0.393884624126412	0.753389362142239
2008036	18	1.45575342820702	0.0334613824393728	0.398318332032458	0.16396205869247	0.111044351806556	0.178074295814942	0.0528081640086347	0.15970996499213	0.453436726113406	0.158390360431476	0.0498986283439935	0.137802132308813	0.260387107437889	0.408306500369116	0.226893410479609	0.205887140502689	0.0510022352550646	0.507155746572972	0.552222812602897
2008036	19	1.42744173717335	0.0143114104570073	0.370594988337732	0.168563995270067	0.0807072946858553	0.115441170158737	0.0223230865727492	0.191763145285158	0.338128732028758	0.406088505673895	0.0619952658746178	0.129898468889517	0.209042645518904	0.33954082443625	0.217818300387496	0.189801170506116	0.0900619435613779	0.539219861847121	0.0255647147166632
2008036	20	1.46585891857655	0.0135353011977828	0.345737736641658	0.100120115981314	0.0787165296929099	0.05486145429602	0.0621406468686278	0.187681486766546	0.285502881013899	0.589197377936733	0.0683629024034092	0.118395947457753	0.162565216416847	0.281398083366403	0.2007762040667	0.175204673548248	0.131385737530777	0.415552087984212	0.0918148720366291
2008036	21	1.69660825302648	0.0383124256456754	0.317688549389614	0.0280816125370159	0.0576550917981851	0.0530175724144102	0.183207179516148	0.183809442913365	0.466935255044618	0.523582422072218	0.0729846777349843	0.104569950699951	0.13601200329631	0.175581822535612	0.179081997292682	0.157824169343869	0.135135099462387	0.363918430875469	0.53590513638892
2008036	22	1.60139763009106	0.0565172131480227	0.352959583303441	0.0114224173562211	0.0321260150292076	0.127203946396303	0.203529409548244	0.217323309120695	0.814158605442393	0.51274522063947	0.0804741604474108	0.0887359208415398	0.143648159767131	0.1551594363587	0.16863436144436	0.144490146153564	0.137625172402627	0.456439429183243	0.835651806741968
2008036	23	1.48400487569727	0.0534069327260972	0.452727568008653	0.0098756653483801	0.0180636615799297	0.121125238078834	0.179881907213243	0.371468349801212	0.965149259822041	0.508442990321085	0.127891351856944	0.072920273023443	0.113763788167455	0.167894805689412	0.186366081034405	0.131591306966626	0.130591926973508	0.872456301366487	1.39512039281229
2008037	0	1.32040807368714	0.00398223598336348	0.517507800955167	0.0173152564147949	0.0111609975161349	0.0085419547724692	0.175351732155386	0.425503228892604	0.860949779498979	0.436223656487921	0.191248257149465	0.0598619971457886	0.100372161052284	0.160797339141787	0.204199033926681	0.12275099998691	0.1283598163817	1.06167182506626	1.32702231250066
2008037	1	1.24753611737927	0.0095850420670178	0.574825930053268	0.0365872536142667	0.0217785064739844	0.0192875450694568	0.185801539572213	0.220741446445978	0.869772740888686	0.383784908468969	0.362233088331372	0.0507186599588989	0.21816871591858	0.140216539423435	0.194384263578873	0.113594703779208	0.125833538353137	1.0576607040078	0.652132284424995
2008037	2	1.11845413878038	0.0699643513469408	0.376700256379772	0.0089298191067405	0.0523170282844274	0.0811147109924059	0.192435918066591	0.0779282613466612	0.992520545088229	0.505381212367164	0.523884823232208	0.0454766657020896	0.203315439464134	0.12455182110092	0.1236582448502	0.0912917531682778	0.109718168122354	1.07521503056413	0.382360557916656
2008037	3	1.16164703025333	0.384719642286497	0.173312655626856	0.0039199012012946	0.0427422485610016	0.220453516023325	0.184686129949004	0.301702432983656	0.688669907713218	0.810626354836691	0.449362079541158	0.0412654925810837	0.158757950187023	0.121120347357136	0.0809028558149327	0.072502142938832	0.0825089411559557	1.19851108019531	0.432429055082016
2008037	4	1.07167066119836	0.448238783227291	0.0803828961105471	0.0133572805722754	0.0196385896136866	0.240511802756561	0.154486118227858	0.409241637674868	0.301918015642724	1.20167670666735	0.236543956462025	0.036714852667453	0.132972920772466	0.120720237484615	0.0545721972215862	0.0613371124790017	0.0634269559223126	1.05126533897081	0.40511082300783
2008037	5	1.07846406660864	0.321403078504622	0.0589675175212085	0.0529713495359801	0.0195537459643172	0.159616740640663	0.144629956569836	0.426721379195868	0.444344180722559	1.13345407807259	0.223904115214113	0.0322086078350465	0.151894759916365	0.120752067925944	0.0374132701367017	0.0532106630559336	0.0534670438285689	0.524424116927173	0.127193072817673
2008037	6	1.26618214760056	0.0849736169305729	0.0225481516756154	0.12871327968416	0.204970754950666	0.117938939849447	0.200660195156479	0.498757417227099	0.508163758437313	1.20462087563948	0.2595150049996	0.0280519694916137	0.181912281338263	0.120393454741107	0.0268114514889111	0.0574795440145723	0.0462597149179688	0.63528835432193	0.681218730260115
2008037	7	1.70513577395518	0.0596965942011865	0.0349139310542996	0.139052931041837	0.406537618651065	0.0888811127991856	0.330410321920313	0.517748260102798	0.559797637524914	1.55637064472829	0.281986014477172	0.0246783589247235	0.179875175964714	0.118693950058278	0.0185256264344216	0.0692283155944003	0.0165442794210948	0.80413182694877	1.21873241830065
2008037	8	1.72366622800262	0.182153896812298	0.155519064091677	0.0917249935187486	0.539084993731548	0.177655509435184	0.477840822336494	0.342575949675077	0.596266206813246	1.99122477659966	0.262646031380708	0.0229393299831911	0.212123665979838	0.116577385752734	0.0119271583284942	0.0717995205715746	0.0132161599292909	0.940983727435792	1.35324864094464
2008037	9	1.96847786100091	0.138860293046314	0.0864550210185613	0.0222047964134278	0.369167629720185	0.321071291235681	1.00634326108953	0.189419768191377	0.736489718021257	1.927241095569	0.254490331223081	0.0229164443069374	0.162301943558742	0.115270188597353	0.00820740053721681	0.06137804075415	0.0113780061814694	1.05898381160963	1.25823623417476
2008037	10	2.54720693603334	0.0197451005464902	0.0571207802927734	0.018616977962256	0.192507862313261	0.215766880785561	1.2643563044647	1.01311725589123	0.87639419049855	1.37596602542817	0.302800611716793	0.0277270023439961	0.135566302657513	0.114543629499823	0.0315313450493629	0.0276511759724314	0.00882532422637865	1.11267887822441	1.21215575568129
2008037	11	2.67321983748608	0.338192964039763	0.0700745734902842	0.0319471397933428	0.119901264073709	0.0989040745715586	1.12681231670246	0.905359751883031	0.983048119207758	1.79578285007819	0.339788710376702	0.0588930084037912	0.133342268138685	0.113822915454833	0.0258030529191371	0.0122932261453465	0.0103157325498954	1.15295466320378	1.09035121212472
2008037	12	2.72329290822575	1.02117194326838	0.0622611593264957	0.0362459028645115	0.293945134636416	0.0790250596487151	0.81860864072724	0.483486016446038	1.10620107992306	2.27130422084649	0.382462050750124	0.141783530434826	0.129538074339835	0.11309532622572	0.0238931903720575	0.00625903083008164	0.0830370251840391	1.20737475511202	0.990075467765516
2008037	13	2.80587595686967	1.0362224167347	0.125777510845218	0.206540463997063	0.776391064830495	0.017035147448664	0.961405313733418	1.5336367296641	1.29820611312018	2.1913046060853	0.397660772001942	0.26179823671366	0.134957441975683	0.112539617927383	0.0245822713381876	0.00519364462199496	0.17310982922701	1.23993248045867	1.07504478057983
2008037	14	3.06640520392861	0.937305316611787	0.201234140737367	0.679938239997116	0.436041294839938	0.461776107902343	1.32107799206129	2.01459193950502	1.49310060881983	2.11816906389347	0.373320770749866	0.363677701534659	0.158260855299881	0.112375422640095	0.0248288808995043	0.0107371682882053	0.112059177166632	1.25851596835943	1.11309612709841
2008037	15	3.57011440886603	1.00698437247406	0.174244968260922	0.889125197875396	0.988893885166139	0.487086344802548	1.51731986559845	1.87346517354912	1.16852589115029	2.30019128628525	0.409732599623092	0.395675120751501	0.279872129000796	0.112497109852198	0.0239056092757886	0.0318469908429086	0.0606072794448385	1.33002261028077	1.01850217493675
2008037	16	3.63052939631612	1.10265013454305	0.15101381047243	0.962074463797346	1.41021425740861	0.389456746601281	1.72714668001957	1.72189073525639	0.510016583593552	2.63581460190019	0.386914517975496	0.387255122426372	0.377642000020926	0.11276549816645	0.0197737519152928	0.00545682070554322	0.0412349981065539	1.15462564513781	1.03431939655151
2008037	17	3.25781752310441	1.37205106329897	0.14150203813793	1.05686572450428	1.39846052921996	0.45007592927441	1.97090548483886	1.7813852026651	0.453581445523676	2.75914858218719	0.35855620154295	0.355373265810513	0.506838817505833	0.114294274658038	0.0174911140685249	0.0873131111976855	0.034026628928299	0.507907047395682	1.04438072266477
2008037	18	2.74516626703095	1.51588304067332	0.130020524867116	1.01923772126043	1.48873797869316	0.498129937647548	2.09933351593758	1.95944700201731	0.503973253833817	2.76081427764398	0.357031653803842	0.273450412491348	0.578028249709256	0.118211762415019	0.0122283078163467	0.149179521204542	0.0804399498209983	0.368788473377644	1.03992200510652
2008037	19	2.68431424250814	1.58286706283871	0.138935852624357	1.0651254782255	1.65005290860793	0.543631560273318	1.9056737014894	1.86396461974281	0.5825757727502	2.56749734094157	0.337672152107903	0.194618116825733	0.484256986285398	0.130013230274231	0.00818680367827471	0.141226422556107	0.38363906433243	0.411899774348552	1.04691808282442
2008037	20	2.83229446947406	1.29155231597204	0.182299617210236	1.24524885401909	1.82758418519645	0.625861411092534	1.53896633003193	1.91891043168902	0.665848956596889	2.20057629622405	0.259288362071294	0.157087405295462	0.365059904241163	0.159813786499065	0.00666066420741068	0.211101208250808	0.980105960763541	0.402894760154432	0.996423263108484
2008037	21	2.66435954747698	1.15892060869114	0.252316172528916	1.17190154513906	1.92743878287855	0.71649784302248	1.2043323128039	2.10921025037733	0.776298029811789	1.88115020546483	0.19959306489401	0.142188653471865	0.278128149288963	0.2509469316924	0.00481684245726937	0.247376099458377	0.831939322857365	0.465632929444056	0.945838580063839
2008037	22	2.31615546772879	1.40731120395851	0.376296907036329	0.91133920306229	1.95272346136556	0.685579220257402	0.923684108085104	2.01637631985722	0.832835908893473	1.70265198008363	0.175441903421219	0.131361254232162	0.239714279449741	0.719265731664751	0.00391886843980864	0.273728014110799	0.641754943296746	0.566420213117666	0.914779701188941
2008037	23	2.20700300541444	1.45232321579961	0.47005731724081	0.845907063137899	1.76165004952746	0.563845221650303	0.777549155733324	1.69418489507372	0.834656302084284	1.57141336793499	0.161064403638472	0.123685858445227	0.390249491052027	0.891412684641637	0.00422271422068147	0.277426986645737	0.77612072938542	0.587952738856821	0.874064684160752
2008038	0	2.31617916971404	1.46785250125232	0.546316053054634	0.920920273932043	1.37862027321345	0.482980842130362	0.758409719817398	1.32351215737403	0.885543978523987	1.534882625461	0.149892877312502	0.122456737088286	0.591996007282435	0.799431109660059	0.00315368990210653	0.298022230377686	1.01658240882093	0.607879751293433	0.823455305181298
2008038	1	2.52489490773616	1.28171695257143	0.613974685126967	1.1480435295068	1.01440613594094	0.680628425493447	0.868844344883867	0.984164421500954	1.02516165207959	1.66398176089732	0.14497748506811	0.119447508026095	0.651391653821673	0.660844719884251	0.0234247464124456	0.311811543283089	1.02498034654733	0.590463883015405	0.755756389373385
2008038	2	2.61833325651358	1.12584040043019	0.644997330059892	1.01400750967145	0.787066462269792	0.94931582941633	1.12434634293891	0.854521149414019	1.10057651418714	1.68582294104623	0.149251715177486	0.115685329583786	0.697292502825292	0.571274545588201	0.0606329566507661	0.310115904153104	1.01783842943734	0.858244876288187	0.68959266248545
2008038	3	2.57532476135907	1.10062601930374	0.641073030714176	0.805769514340645	0.715666056719759	0.943604078233129	1.14296377554657	0.925837428215153	1.33380491433701	1.58767573394361	0.15639606648714	0.0994660928823272	0.70149355988242	0.666968236213567	0.10254527491394	0.229571789360712	1.01329467721493	0.966272938875652	0.637721668031117
2008038	4	2.47924079077385	1.13010943346614	0.611468320604612	0.623879842121777	0.746462991735105	0.754025235614871	1.04046916740967	1.06734182111585	1.27828908421541	1.56381358189194	0.156575875054046	0.0828851928603	0.951716150151997	0.777967693274127	0.169352973620279	0.284505455716103	0.901002553469677	0.815650803562392	0.594717396394141
2008038	5	2.45098996325458	1.20367987536463	0.587383945857099	0.515164417687755	0.87346062825266	0.779665275554814	0.964144474484593	1.13393469535024	1.13120071158873	1.53078382540119	0.15389519947745	0.0727311083202428	1.02773917645936	0.839887920338435	0.197036780114904	0.478972487772054	0.703441418984894	0.526929506179093	0.59303367041176
2008038	6	2.47030691686579	1.32488788891545	0.593262133207252	0.482442461164135	0.913251644345891	0.753655564628642	0.926468356909031	1.09607000280747	0.899716692120597	1.48927482635473	0.145916893873648	0.0707868312116377	1.03219984278931	0.869737049846762	0.24011548962701	0.486967081852289	0.591076650360342	0.288225459384228	0.593386839328323
2008038	7	2.4543713113405	1.36398306497036	0.585066875744807	0.47009009215063	0.799368572456466	0.760693877727638	0.92134570037879	1.02900199214293	0.589982264648425	1.4495479612419	0.139274526895755	0.0625704129804511	1.02590059743904	0.869810919361514	0.266184577230389	0.474567651597396	0.663016527238891	0.222786564908317	0.631445144456119
2008038	8	2.40155626145323	1.21776904524136	0.571251862751423	0.478571130196802	0.725605079996005	0.766406121017363	0.940425434413342	0.904103768962877	0.413817904791919	1.47279879048373	0.136203716492965	0.0525228384231478	0.99896637114506	0.845193347825711	0.268492228075364	0.38848831603087	0.811405870825406	0.194226497232247	0.651015418608034
2008038	9	2.31414324181686	1.13750922123416	0.561813183003238	0.518567077124891	0.685775919177546	0.744329237326407	0.987015368124314	0.784082018298693	0.364352655769102	1.5695459603802	0.13780693996662	0.045912937329517	0.969802271254173	0.83856171353082	0.310983497952151	0.337139660302591	0.889065771909289	0.169403257982528	0.656200175577048
2008038	10	2.22211162766407	1.11144466669383	0.541965735494025	0.522118487653659	0.653706373995731	0.735469841592066	1.05044498412267	0.731734156708412	0.313920517211034	1.68252709322648	0.139622907923253	0.0442371800786003	0.974879122178311	0.84447435592567	0.35058981001871	0.288139311952486	0.921083126728264	0.14009278104624	0.699249451076138
2008038	11	1.98750969873143	1.00874349102725	0.524927925065622	0.528428793259249	0.582070587143681	0.676953891563844	1.08540251337354	0.752871177771346	0.269334620549309	1.80016895841324	0.142309046983608	0.0434879562886002	1.00760837391114	0.83936281945458	0.350895925357577	0.255896606723369	0.808402968854112	0.113777160337216	0.752463876913726
2008038	12	1.7655037406673	0.769883323363027	0.446435712358727	0.472212706547799	0.496646512248924	0.640429267810532	1.06694400534791	0.780079033842245	0.218484078309749	1.89737180723914	0.14887335644055	0.0412888461293586	1.03855184450312	0.867097999516281	0.340067229407475	0.250902461633563	0.633823432153047	0.0962529901115483	0.68204426862205
2008038	13	1.55608366295565	0.691969786529483	0.408259915951867	0.42865116901008	0.424119519890083	0.59880608530039	1.07721019339258	0.862993173658859	0.178104044020121	1.97699579982467	0.158827515594551	0.0394842365955405	0.998773560804033	0.854365710929161	0.279206488965505	0.229144948934964	0.546263440909009	0.0860950556487842	0.568321944330985
2008038	14	1.17209002950984	0.705867988524358	0.379720969962379	0.425173538269753	0.392559487544123	0.516403187311622	1.13568167244187	1.05674634978682	0.158701064867005	1.92234758131574	0.16210563037189	0.0373593391777988	0.947366974900454	0.836222298546305	0.221626555676939	0.219125425380602	0.460558872628232	0.0997957031934457	0.529360184328946
2008038	15	0.930772984499928	0.696223872784046	0.365952564802489	0.45494245471759	0.369389282615643	0.425134748336657	1.25924207124502	1.33939665692229	0.167898216376366	1.81034530852799	0.157885550190342	0.0331155213748159	0.896238648472743	0.823134786375892	0.173543371758948	0.210827919093631	0.33767079057944	0.145601030505591	0.539703610620993
2008038	16	0.917660483313209	0.680399917303114	0.352588306039171	0.50217527149715	0.330722395780865	0.465313832726908	1.45133227130845	1.52218541710375	0.207530355759763	1.50922800741269	0.150860372420628	0.0291667701307854	0.873185031054705	0.812108678970048	0.133778866237223	0.201686490593641	0.194330041816634	0.226518339056464	0.581023113148168
2008038	17	0.966606874586819	0.657573491916332	0.320865287886695	0.601200897534582	0.331149977130423	0.546625072126552	1.6478601201045	1.54138729328546	0.257670126699968	1.11681173793872	0.141713155041627	0.0264271121592571	1.16305542393927	0.793865580953112	0.105801391414134	0.192368275850896	0.162412133177665	0.301188004206174	0.604867150208541
2008038	18	0.994826728382297	0.658872933009228	0.286384435779351	0.630084726112945	0.366223262044785	0.619058293553975	1.62279072890148	1.49415512521706	0.305194306340487	0.936180087836069	0.135000507970328	0.024561112468714	1.366529150083	0.823915856384663	0.08246941398819	0.172487253411552	0.16501287966915	0.34858253320905	0.605865594487445
2008038	19	0.955181304671908	0.69695619877471	0.255821963790306	0.692644930661064	0.410828916811506	0.638391735827851	1.28332412584436	1.33985786400227	0.352565223213544	0.857967720045285	0.140364389819803	0.0231645303671488	0.897362125805769	0.994591423061091	0.0656100678438254	0.167325922277538	0.17148641918103	0.367442053313916	0.593983633064158
2008038	20	0.903908624300703	0.709237947714999	0.269473574899364	0.764482101577735	0.485249993488458	0.641562866602413	0.857171885901636	0.963447135033289	0.436190616819329	0.850267086824029	0.150937333174491	0.0224026644515356	0.820546033326088	1.10146316546501	0.0546209826649248	0.163019012067793	0.147172242911435	0.389801699994889	0.574486096679816
2008038	21	0.890789356059812	0.692692012632268	0.263940649773519	0.804279897229413	0.649069651723175	0.638525787389076	0.798688829578597	0.751396696259351	0.739702593555004	0.668419763956824	0.179002526911649	0.0222251099965303	0.712038083258132	0.858406508950093	0.0472779669749984	0.171846859851712	0.112837446743756	0.541529145095476	0.56949770831275
2008038	22	0.989976322978956	0.676056515283314	0.256158351214528	0.816645873049121	0.934729807339372	0.651611398195485	0.780559237521254	0.65260178815782	1.2468233347639	0.46250448487133	0.22079097143032	0.0225901540585585	0.28347456500316	0.757947499299768	0.0410095623875704	0.175856490688314	0.103400682669126	1.09287272031908	0.571834096893707
2008038	23	1.15074202637556	0.653382413106868	0.248489298111646	0.798038433737924	1.1482979087003	0.666950157864509	0.754741905581455	0.493766688544958	1.24734041168322	0.699653900007441	0.226640352057101	0.0232334030508252	0.202311913595849	0.628767082811879	0.0356391592237697	0.210112347182529	0.102442548336703	1.25133108742991	0.572500355807578
2008039	0	1.40260624787273	0.628500204348391	0.24300782584733	0.730573616488057	1.13750375926188	0.704136451481269	0.755193664070918	0.407917363596344	0.904740955510011	1.4198652504222	0.223165044803689	0.0237511464906823	0.206530378322102	0.614251823583306	0.0304564332585606	0.249197182201886	0.101567999211926	1.02856055553212	0.568107864987514
2008039	1	1.85920704556283	0.621983639622937	0.245404067815663	0.625308367950561	0.967181616708354	0.746876429331869	0.872408880045127	0.389642159729929	0.749895880339785	1.91600281327094	0.216232695666594	0.0238354895228145	0.169645604710247	0.624448786401858	0.0248434035009016	0.261648069001261	0.103958840552692	0.771530700439527	0.564146459676133
2008039	2	2.19331935773694	0.639378691499402	0.253465438651741	0.547087267078959	0.603762380818244	0.764663726752098	1.255076749065	0.401564522228604	0.505396197479402	1.97413391421642	0.213940664125527	0.0241134071161233	0.118978145407693	0.603345931486337	0.0198652851992462	0.270888344468165	0.102761011155048	0.697295204446132	0.555908410107415
2008039	3	2.23814084477394	0.672276554896075	0.267444002698046	0.523721191740061	0.467436162063543	0.761141600358144	1.6563458768584	0.422928560077713	0.403514218979911	1.69804676082006	0.222536201901135	0.024699830073774	0.0978602504473711	0.56530806967508	0.0163578083683518	0.281625913528376	0.0997206198979961	0.676071858287647	0.548447503472135
2008039	4	2.19082698855349	0.698327502127362	0.28614908764991	0.517701838854751	0.445060956352542	0.747396075497485	1.7623060803181	0.424532103789664	0.666727120829464	1.64458479224787	0.243083069510565	0.0251866704910873	0.098320105422339	0.526980226810504	0.0156369857635694	0.292205049773735	0.0961758049094363	0.815639570440499	0.545010326648681
2008039	5	2.10143758896227	0.702837668534336	0.302034088086356	0.526203627905629	0.422574151239059	0.727151465924284	1.67229636602428	0.411902560755453	1.11709783173545	1.65694524043698	0.261594091564774	0.026252690929926	0.120248096870219	0.493272588392029	0.0237025529089885	0.306679723288838	0.0875818105732678	1.27859887775113	0.545528489967126
2008039	6	1.97819376118089	0.686344044330412	0.307129388849354	0.560509724790404	0.402524055638375	0.706585295707649	1.61779752788223	0.4010890069819	1.62403346945133	1.7241048913837	0.256966898040943	0.0290175103768677	0.154289212181671	0.466006525155175	0.0425746944006453	0.315834140093538	0.0928099895940998	1.64949723182532	0.53690385406472
2008039	7	1.83570295585475	0.651352705852719	0.302492089193842	0.579800908532716	0.40855694292988	0.684489692468315	1.50476166360196	0.415071970101451	1.89831065408533	1.8381843996139	0.197015873102125	0.0372104178085113	0.210149965808093	0.444411029308953	0.0667142772352455	0.31541987928923	0.0934448802589632	1.80525662483478	0.526656042962444
2008039	8	1.68867189133822	0.609541736667087	0.2916903358408	0.583366628729551	0.42193938952763	0.715134903263905	1.39277015810738	0.475826230907908	1.84970731656065	1.89302149865343	0.147962464231226	0.0581673075319298	0.291170097104754	0.432344057626572	0.11023375584612	0.298087563023792	0.0944703550725861	1.87825714851758	0.518678239766864
2008039	9	1.50784745604863	0.565296345331505	0.298148241625486	0.584605133652944	0.392634398024723	0.712526257472858	1.34572320851051	0.519674680371151	1.75498018534009	1.87328654561378	0.129009706114187	0.085823616065526	0.439859553876705	0.465362285411325	0.095331455528099	0.261006731350062	0.100556562329241	1.83038610377117	0.505232659148436
2008039	10	1.28644327902734	0.523104363710259	0.305195598479391	0.596356455728879	0.347266562038484	0.746896390079567	1.39541142790008	0.554881017931546	1.56959897215146	1.85593293631192	0.125154702371999	0.112745901782863	0.844222830782952	0.489044492245497	0.0849707591118605	0.234188395867335	0.108825705039561	1.68267650958736	0.479705592221212
2008039	11	1.08052974586885	0.477615935132753	0.326106236931522	0.587167847403687	0.334872384340548	0.737651114615749	1.26618932569531	0.574509750075041	1.41639351016775	1.66791447095087	0.12748444425668	0.13307846582823	1.43746654474438	0.545443042846173	0.0626936486826768	0.213314596275723	0.14697491165623	1.55766387472174	0.443647424658003
2008039	12	0.897682562943441	0.402368749416668	0.313229369669091	0.585376452938294	0.334782932691074	0.749701431055331	1.21730211057827	0.610671646631296	1.28849125535181	1.3766578234053	0.141086566639768	0.148133652756229	2.05503609500493	0.603732811616376	0.0498653602562673	0.197684039914817	0.294615747801062	1.44066002517889	0.404028212874052
2008039	13	0.755505730035926	0.352782619638383	0.244745470757881	0.568948743514991	0.382487269261181	0.751536128671036	1.11300480529659	0.630852902601358	1.14053786477172	1.15195324543721	0.145945203205636	0.152328965396099	2.50620707450434	0.609300404771517	0.0445531006123256	0.18828840048701	0.46190526682185	1.2958823947277	0.363946713213469
2008039	14	0.648125137669599	0.313294353383097	0.202565806128412	0.532215739942065	0.450968608620259	0.739285145317342	0.997666991758087	0.645621475735601	1.02591472697143	1.12620231939402	0.12950177381279	0.154926338124216	2.5665964224725	0.590151827841821	0.0416140470279655	0.183287330650738	0.541790614494327	1.14011261473403	0.282166021649571
2008039	15	0.572805279724142	0.291239436901733	0.195154221320718	0.503777374694319	0.504059330055574	0.729970732134416	0.95544283366782	0.624518899975427	0.959514846405695	1.19049467272851	0.123078068316691	0.15843179244889	2.26577312341038	0.553338079750281	0.0389998343198212	0.181473126018636	0.554956727547798	1.04476430046612	0.207919724313199
2008039	16	0.522677307166187	0.279589998917268	0.194889944164095	0.487462684370348	0.489395580760766	0.70819597273691	1.02780726513602	0.609509189703643	0.909776181221951	1.20198707748614	0.133270759106477	0.160541387837365	1.97497813040674	0.516941035295348	0.0361913267365516	0.175977250683878	0.516553596012366	0.986768100785153	0.148995105623994
2008039	17	0.492579548110914	0.269530852209474	0.204990115269167	0.474616796484214	0.433243730654694	0.68407579717943	0.965695017433746	0.574315178116056	0.86214822535519	1.1628901425993	0.210877778509572	0.164756973378543	1.88626543221052	0.472120679293824	0.0333447713353275	0.165191998307031	0.453622626644806	0.935206168252019	0.111633683153823
2008039	18	0.483587985195603	0.263068041166735	0.226724429466573	0.46520895790316	0.388942199863305	0.650551334668647	0.892172706006725	0.519905375648121	0.819376577176287	0.96376868573328	0.284081332175674	0.202895832506423	1.87789909144365	0.425634718417231	0.0300216532222468	0.150377524791916	0.402335510250756	0.880404741468485	0.0888133922271219
2008039	19	0.494097860343007	0.259965377942079	0.251392034274709	0.461736908709599	0.362173709174865	0.61907007358762	0.777322542265933	0.475771964843155	0.782796680086448	0.788977854861307	0.332065530447482	0.255902944144426	1.82414358126547	0.408039247367885	0.0271178834364771	0.13776175318308	0.384316371861276	0.820873248488591	0.0784348851672378
2008039	20	0.545846063074314	0.252688366147421	0.277068545106711	0.462838954598798	0.359843916262018	0.587584567427791	0.64159220503001	0.453508010917488	0.750898199481023	0.681214025789534	0.353139777061483	0.305789621105149	1.66550668181656	0.470460376795978	0.0245521304943942	0.127514449826702	0.372565949899797	0.772007742774306	0.0747009700699638
2008039	21	0.644986008336159	0.246657445830827	0.312624201721133	0.468960856487964	0.428177504167145	0.562978866859787	0.520118271331365	0.430090786444645	0.724492152209884	0.794221843682046	0.369690228797236	0.313168933943424	1.5028132177008	0.892974725323882	0.0224505867843663	0.119186131201652	0.362080080872497	0.749159373282762	0.0818243589633166
2008039	22	0.744957948000536	0.245530585018274	0.340927970521527	0.474603901658176	0.490572256415031	0.544677311740802	0.446245253649077	0.3899076689691	0.67113366665644	0.91301314457352	0.413108010275903	0.301486669601332	1.350506327811	1.40670871304573	0.0208731228807617	0.111546178382966	0.352477896751016	0.753485833843551	0.107566142685808
2008039	23	0.811518864192403	0.250441467228302	0.361969706812619	0.47854523884753	0.527522054972217	0.542006365317762	0.417913818473596	0.395668344902953	0.588672298007049	1.03094682824858	0.413103952556112	0.327860679580547	1.1992721560714	1.44218531740242	0.0197391952629942	0.105218116764488	0.344686742488916	0.752232951219624	0.134899920459081
2008040	0	0.843054168090213	0.259016850778851	0.382587808337453	0.477365920496002	0.547905712851722	0.527293733890515	0.462535015729629	0.437204162770796	0.502915906708272	1.06610884296166	0.390369899128911	0.303067813475864	1.05007984447269	1.32767743403942	0.0189117805354985	0.101663116231374	0.34705130534081	0.702080802369109	0.158154186252351
2008040	1	0.795725111873992	0.260523897409915	0.400737658866879	0.466040030183362	0.552754598570493	0.509090005346198	0.525995374431915	0.502171924222003	0.435771776302869	1.01026056209922	0.520746193212888	0.233416271069317	0.966854861951079	1.21383884869932	0.0182307622566706	0.101206398512895	0.36064971703761	0.600798796335654	0.173117208045092
2008040	2	0.663268145658528	0.260420527923266	0.41068521913466	0.462955916044045	0.55432153860761	0.493769996655588	0.564495243899004	0.558353983117778	0.416577804797137	0.903865374083633	0.855849027008907	0.199857417732253	0.961141759964429	1.14467277986949	0.0176359933122597	0.102484681394752	0.383720041905267	0.500332650907224	0.189584323200099
2008040	3	0.507522787230316	0.260465502738459	0.409908445949217	0.464067043478679	0.547166938030365	0.486877344655193	0.609153315335968	0.584778746764635	0.427964655933077	0.852671327178617	1.15695578895425	0.189257635336852	1.02349497302773	1.12995946059413	0.0171294394954234	0.103680004915746	0.401814119079854	0.474053279476759	0.224752315816702
2008040	4	0.394950774583784	0.26255401394013	0.408781897933023	0.466075957061987	0.509839000406662	0.479997018609021	0.630540720902224	0.589509187235149	0.469587677476348	0.826179541697854	1.20870581694618	0.170814704691384	1.12266876177344	1.14181919287752	0.0166927840332413	0.102838141027646	0.414456792919275	0.5647994609351	0.271763329430129
2008040	5	0.286319567053468	0.2713182101039	0.406385258530404	0.471638023777409	0.441473212064443	0.474501080120487	0.621384942132504	0.612849187835823	0.531182572093259	0.76800841538606	1.12602628696352	0.141315668541334	1.18763006121436	1.14387678128876	0.0163152990273304	0.098002328515375	0.4268481603757	0.860375768100517	0.30899811765379
2008040	6	0.220469009436036	0.28522126136766	0.40337522478812	0.517653121842481	0.420808557658004	0.472195054922094	0.584244253427757	0.587470033570898	0.641661440222903	0.666199636333774	1.04106840492836	0.133335093773807	1.20533743822593	1.12857042323657	0.0161804904089169	0.0898361939396426	0.4268004158429	0.974068360252212	0.32757989347166
2008040	7	0.20553503254716	0.30606574750388	0.401110532449238	0.515639458078108	0.397028584869809	0.476773611270575	0.510676473767692	0.53300302057892	0.75484154461486	0.558794055818091	1.01161709802179	0.121892701596917	1.19057753659153	1.1016387513082	0.0167267418189062	0.0827432061314392	0.400612871112981	0.968952794438248	0.325144640616699
2008040	8	0.215522387819469	0.324377382041681	0.410062512693879	0.505265249726706	0.362346954444265	0.470507526321186	0.402201072466359	0.457461963758171	0.687741803672673	0.41820174681967	1.12860058444951	0.114514112064238	1.17462538865297	1.06612259700023	0.0268967773006802	0.104127157861348	0.373343472916386	0.932379369165946	0.27749021223885
2008040	9	0.223741920757412	0.336868233200474	0.475025502953551	0.513877264122404	0.345995871337647	0.461740176073659	0.293957205934879	0.361513140806396	0.539806677835145	0.341676104257639	1.36430686702267	0.126431162899527	1.19889564215613	1.03071038287404	0.0350492492293155	0.0886179838363563	0.353811286551254	0.860737488904139	0.220841807432983
2008040	10	0.226932087152099	0.345946215763761	0.511849821032999	0.549665195622595	0.32004350529935	0.489675977402604	0.223784179685789	0.260483983305668	0.422195475773523	0.359228944016669	1.50897646518386	0.217132473812597	1.4335446216282	0.991765242052066	0.0493326828202411	0.0806714717452342	0.33647192978155	0.740922806322589	0.203042377584197
2008040	11	0.230675191319964	0.353668314185767	0.520873379860007	0.48653915029732	0.293344648490415	0.41857195067023	0.190166756378788	0.20245985526799	0.372431265652736	0.389150246105537	1.52628567994155	0.335706136948163	1.41922529410616	0.942816014460422	0.105823959879438	0.113714586912113	0.341252755348841	0.597127299400187	0.225124434578251
2008040	12	0.232901303189856	0.32059708809931	0.501720645036993	0.472859257231624	0.286382153065637	0.357876773374665	0.175658578114129	0.153992318684293	0.298785398399149	0.393252952080013	1.49657197797085	0.437416680460258	1.39592662710808	0.879557524230905	0.132757570467867	0.124209143326304	0.389602581814695	0.451102624134792	0.233426576084062
2008040	13	0.233787989441083	0.30527322293529	0.479520241586761	0.497334826631121	0.284335132007563	0.32127566714164	0.175661893290404	0.124162847805288	0.216406609860677	0.379658036046789	1.44038357492688	0.488767833838093	1.35869430844338	0.805097131341872	0.142996020295528	0.124760986403718	0.438086436028435	0.319203405239007	0.277265342026719
2008040	14	0.227107510861285	0.307182478733887	0.453722245409616	0.534319839283795	0.25173852265956	0.289668053572178	0.182013855817945	0.107426726930376	0.16533087134811	0.388941735432416	1.37500340721882	0.543439266990981	1.33395910366219	0.743686254842773	0.145022504960426	0.121916734390562	0.50179219938379	0.232752274018472	0.272743597089261
2008040	15	0.220010254205514	0.318618719428907	0.427155547256843	0.556720831784544	0.224066702780393	0.258621754065997	0.185797093662304	0.0976354911117109	0.15128769341178	0.415274603262255	1.29109852403999	0.575358070659489	1.3202294542	0.695974635615188	0.145227614579591	0.116502213937344	0.550674129663355	0.195014819183142	0.266280184221957
2008040	16	0.21995377111573	0.328417798754589	0.401339622927146	0.549151723262148	0.222086044006702	0.232299842487415	0.19410365372995	0.0954373263460411	0.146902242556064	0.452769375082144	1.16377572598332	0.573714567968354	1.2590793566968	0.659877076741932	0.142398806332509	0.110833362500972	0.561490787746665	0.190972279199678	0.266905272541763
2008040	17	0.229577577829133	0.33124131035306	0.3626185254441	0.532254253806258	0.230653334751768	0.210124263907546	0.211184734752302	0.097089800806797	0.144054038255379	0.479745771852399	1.03211165737532	0.554724226924132	1.144259546811	0.641431343663816	0.134500498659447	0.111896469071943	0.546831029634289	0.225104079145016	0.277175552237551
2008040	18	0.247637184210362	0.33245743063654	0.323466265881092	0.514734172861564	0.241582344388543	0.191754061112296	0.227761778685738	0.105170748896964	0.145304909164806	0.493362079410806	0.915088003072331	0.548781776012664	1.07711115740812	0.638985395460968	0.132585508079225	0.121450896064478	0.524799985100012	0.261793242751984	0.293838909183436
2008040	19	0.275472351768621	0.334092645978604	0.287749105218049	0.491102399513642	0.254333319786839	0.173349256051032	0.241643957446933	0.116528057209875	0.148205551827177	0.496788606340671	0.819878560504867	0.531565778148703	1.08597692872917	0.636905481749024	0.137296988140467	0.12284823160774	0.499686462253146	0.29562580873408	0.294630851077442
2008040	20	0.290183434037441	0.343037774922218	0.257377712408211	0.45425179440065	0.26659191708223	0.1575729429418	0.240786757166825	0.123162271161938	0.152803914078187	0.47542937907212	0.771742665029493	0.509454144018947	1.22661874938666	0.634610347986276	0.138279311542717	0.119973680209888	0.471466086747409	0.340304700247272	0.285688387501948
2008040	21	0.309364017123497	0.356136034007067	0.2307244010496	0.404681908208528	0.279108617458919	0.143692644974026	0.236376173655852	0.137305635801825	0.164819346323407	0.440376302765465	0.741713987341522	0.49745802485545	1.22211308924635	0.634584818568465	0.139793862918362	0.115085578193105	0.439417496828356	0.392588552584671	0.272817466591144
2008040	22	0.326776684870148	0.35912430453765	0.206142163622786	0.324848784067713	0.294938591100787	0.131615047177808	0.233250537251125	0.152176136065533	0.176870017740789	0.392108321064055	0.717356526090463	0.49484641628157	1.22107038964211	0.620435687640267	0.13733395477234	0.110379203440711	0.421242750340966	0.427697059250578	0.261451796672558
2008040	23	0.342893014295656	0.354642837251873	0.183287747637574	0.254787229293889	0.317023586084645	0.122570098914327	0.243454081282943	0.161892914199752	0.187192787675082	0.3341952369665	0.689331125959429	0.494952099529283	1.22983630842801	0.598634565259583	0.130596570861451	0.105130325238907	0.402425948573922	0.466946179749507	0.251314163471667
2008041	0	0.357382649602011	0.343911487826944	0.162626039967756	0.213276350528473	0.349614166641403	0.119668212179365	0.257180746357125	0.163634673621598	0.200158640131748	0.28299971692718	0.661045305259026	0.485679357880915	1.23039105018044	0.581095942059141	0.120357607505791	0.100470528560572	0.414309448465127	0.489086589410036	0.243411085420843
2008041	1	0.366926726616225	0.33257900358494	0.144330153639605	0.185598789379367	0.37630142224745	0.111717931100878	0.253964450317117	0.163313926684471	0.2185658724112	0.246533858018361	0.636530533562824	0.470101103254159	1.21402928639208	0.559845715275394	0.107786421642178	0.0973044653139524	0.438442101473328	0.508419912321042	0.237000697989987
2008041	2	0.367188947623393	0.320449737380451	0.127799395676824	0.16557794466748	0.369357474017778	0.0995475603742386	0.248436103187154	0.163985143037377	0.233385172707985	0.230030160164535	0.615081618853253	0.454450403407128	1.18758890072143	0.535529072761233	0.0973444912693774	0.0941083949789129	0.447254360762644	0.500919235696334	0.231167016910979
2008041	3	0.358213527473355	0.306127493216646	0.11267548406596	0.150040694585258	0.352234559181127	0.0899666497462078	0.241316801098983	0.172905789172313	0.246830003873907	0.224242936295062	0.594859191246315	0.439781749048925	1.26255771817434	0.51284980742218	0.0960033902312491	0.0888187606616124	0.436451377388186	0.4796080152226	0.224086962196193
2008041	4	0.346918988473832	0.285733013145091	0.098822135604106	0.134498773370069	0.3411515673467	0.0823797619804535	0.237841936511702	0.18951914359673	0.240942512388148	0.220073660106553	0.575891652106229	0.423747447459911	1.28097081337528	0.491738942787192	0.10069665013033	0.0794927925535962	0.410551364477178	0.4719095003097	0.215589521404612
2008041	5	0.337019604078448	0.269534324701053	0.0861478228146318	0.119362976961797	0.333344548360335	0.0768015065428334	0.234714259059491	0.209339253518226	0.237897857995111	0.216982612639089	0.558763008488741	0.406067181649756	1.28288607365364	0.472123136487739	0.108867803281194	0.0675621125508883	0.374488905114142	0.501920232463416	0.206277353689688
2008041	6	0.328862464832108	0.255758725318909	0.0744385955181386	0.106509023287381	0.325019014342882	0.0722748835313071	0.227313923355183	0.229415363487413	0.229335249994911	0.216991206999867	0.548172790270146	0.386351949920772	1.28526390861437	0.453224458373276	0.120014740539808	0.0566387237375595	0.334960598104925	0.509447495725996	0.196690784207985
2008041	7	0.320671386675659	0.241588283179747	0.0638956994616815	0.0961533713165797	0.312847659850219	0.0683042534735184	0.219266995834305	0.242260647354562	0.226407607882847	0.216829059981478	0.549031063979269	0.365212474343249	1.26306344601029	0.434433642663717	0.135050039024977	0.0541783801192525	0.29680251770861	0.513505735539708	0.187500112616384
2008041	8	0.313213570430218	0.228521928895629	0.0556275213168716	0.0934011561966702	0.301861086394235	0.0667526820211338	0.21640183974193	0.246944034195902	0.2257491200933	0.215416055816272	0.544153209044226	0.345028118748414	1.16978665962263	0.416112153957557	0.151606552640137	0.0769352662672249	0.25575164636355	0.539161381834905	0.179854224836055
2008041	9	0.305254035035119	0.250252024530277	0.0695071760321126	0.0953046944284132	0.292022811066405	0.0867378585657019	0.214105498124868	0.240654219326489	0.222416508459366	0.215381467343143	0.537926442165911	0.328110232057832	1.20488139335341	0.399087201462506	0.164910779274127	0.113035223141366	0.213169049891805	0.534975747609087	0.173690630115729
2008041	10	0.295413648504369	0.243527675293997	0.0929059015028915	0.144893250319249	0.282126316906239	0.109696643036629	0.212307708843843	0.238637800813203	0.219247857849611	0.213109636598813	0.529872282341417	0.316844372452151	1.28042226544006	0.382483725593313	0.185900597007773	0.115555136238735	0.189716221667317	0.47733958496705	0.16817775520686
2008041	11	0.284530615480567	0.254532112487729	0.115737798822645	0.135631780730901	0.290735293523778	0.130182483373959	0.205099798216158	0.2698791476338	0.217247597146981	0.206943910081873	0.52276076115761	0.307333441074722	1.29798649712917	0.373563275633389	0.206305148240985	0.132745510220148	0.20479119053953	0.407959880613208	0.164134234284414
2008041	12	0.277757677017763	0.238332935270646	0.122118838712456	0.150270807060009	0.276743880104334	0.127639810026672	0.193714906460695	0.273537866721918	0.210993525395846	0.197082677016093	0.502888947420709	0.29568750050443	1.33423640206859	0.381787996410159	0.22232544789943	0.137078646580997	0.244447706607198	0.345225552907842	0.18010744253226
2008041	13	0.270358056504395	0.220662725912644	0.111882389658255	0.16234046046199	0.26587651983305	0.139867028080532	0.182740911905402	0.272132773452469	0.199792166989422	0.177226425369478	0.530826122599139	0.280351040468042	1.37089715941347	0.375497280884938	0.224777806409408	0.126966827641579	0.276380826954856	0.283582521357611	0.194824644646713
2008041	14	0.263172496997822	0.210076183245777	0.104039569971306	0.183510564695804	0.259710263779699	0.145522835821308	0.167974834629176	0.274748697502399	0.186491718237908	0.161035338995039	0.530314456706848	0.256854460241731	1.38925046729534	0.313050623227722	0.220999731634856	0.11879730546885	0.282959383555367	0.247258962373764	0.178808564481525
2008041	15	0.251780628106019	0.198889880327589	0.097632867879809	0.164504749836136	0.255618514759615	0.142223054427658	0.162274653549695	0.265815518672951	0.17862567817665	0.143277883075434	0.501082779874559	0.22043049104985	1.37922850344877	0.177971721060847	0.215985212634908	0.107447062527531	0.28715545254817	0.255241047915327	0.16709779466463
2008041	16	0.241461518020304	0.189776949894131	0.092617509570206	0.14494801293513	0.253073637663318	0.137903812562362	0.161887413255976	0.259299121280964	0.16301466391766	0.131426238563274	0.467407394065698	0.185427446206565	1.29463394512527	0.115410494705632	0.210793463297792	0.100408807599875	0.28956351671389	0.491232195788389	0.155361582271192
2008041	17	0.237460655658577	0.179665451803994	0.0877954942213098	0.133301464654264	0.246910083707532	0.13091306701026	0.161902725878632	0.252421411994054	0.146196989913257	0.123237882266476	0.446076977379746	0.171590085903937	1.16114538774868	0.112377273309592	0.20449348424621	0.0966255449263	0.27861107285069	0.77604692888463	0.141755224670301
2008041	18	0.234250462620485	0.169007460263975	0.0831880347030027	0.128189021276301	0.237870502435639	0.120618386397827	0.15970652588655	0.244279229698509	0.146684132938674	0.112870438855983	0.433911483500829	0.168099933677071	1.06484637002936	0.131160378763368	0.190838660135039	0.0891267478198103	0.257763677249148	0.809073999168819	0.128085189301426
2008041	19	0.231073900084604	0.15802848398388	0.0790840843261347	0.123489013856594	0.230525672284273	0.111214423218791	0.150590794775006	0.240274210719017	0.184802086893014	0.102425318924312	0.424807475312259	0.178212857163737	0.950732631372061	0.17999581654115	0.163642416736141	0.0814516160138823	0.225764006143643	0.818571539310112	0.111360141492678
2008041	20	0.227627064187157	0.147336341110892	0.0807967200747019	0.120113122337029	0.223784737814348	0.103299864522435	0.139214756457568	0.238248322820453	0.33368650330323	0.0899648127905941	0.413034145861111	0.201563810288412	0.695893072969788	0.201821179150889	0.127112889760767	0.0751197332767856	0.185728787906367	0.965226269240589	0.0984769741627877
2008041	21	0.224061813606806	0.135012347289612	0.0825920396441456	0.118827313412201	0.216248718078093	0.0976062705892124	0.128095853081752	0.233338514176229	0.438951955459893	0.0822741431402256	0.3973746430394	0.218528436901792	0.400464573964396	0.197676618403223	0.0955676360988641	0.0692896545216315	0.15953692324784	1.0578187431837	0.088401336199387
2008041	22	0.220353411671082	0.123536674903975	0.0842837678737	0.122682877921995	0.207702054375865	0.0932742987918865	0.114671200704413	0.227818268777824	0.431220841371712	0.0803744554253776	0.373547233576917	0.226319056309294	0.310857730617538	0.194313220315585	0.071627851395229	0.0643496633972053	0.149416695511149	1.1630660031168	0.0803501728996211
2008041	23	0.216260266898291	0.113376648619624	0.0881457232740045	0.120845759807035	0.200738596993987	0.0902918842560918	0.100339910874242	0.223810647756406	0.524621102855554	0.0998224411412243	0.338083412631231	0.227362516420681	0.315854525866814	0.192059613671059	0.0522891662765632	0.0606379305774588	0.148782057842287	1.1814998481556	0.0743753009258117
2008042	0	0.211574523573202	0.104404963940125	0.0904503528553983	0.124732291663785	0.198444483689522	0.0898251300135506	0.0911804092221177	0.219356352539756	0.688299243563287	0.193546355783833	0.299575940333116	0.225184556456561	0.335083304449097	0.190328356024905	0.0364084190223226	0.0578158975889723	0.141942056463255	1.13850346941488	0.0705742145300062
2008042	1	0.205222696303616	0.0967699384169904	0.0893923459614451	0.124033520421686	0.19826463876621	0.083792786138095	0.102620752167028	0.214633659710235	0.883623978916673	0.361431141327626	0.275116047170834	0.218690066986846	0.322317624302452	0.188963089914272	0.0239436086174649	0.0562432451219182	0.141821349079734	1.04474629101576	0.0688765452481805
2008042	2	0.197913169802603	0.0903547830031972	0.0861283034221031	0.116974899636364	0.195721368957457	0.077899774212082	0.144856962602174	0.202094734825465	1.04436208415764	0.506657161690791	0.269213483558439	0.211151644818546	0.287772707901112	0.19079449208101	0.0144078149318078	0.0562450093108737	0.148081509635388	0.96223396899019	0.0720556011436694
2008042	3	0.191459892657393	0.0849688131832332	0.0826767803205559	0.109223269597306	0.191603492109014	0.0729616190051405	0.214089540779544	0.191033769386089	1.1096964079538	0.564195308219313	0.26960666930811	0.202245524320319	0.270082467234908	0.19670776093762	0.00790187983761894	0.0578404344409584	0.140795018193353	0.899140413944893	0.0839382901442428
2008042	4	0.185810626501785	0.080491304684606	0.0778227575789032	0.105451895712611	0.187933430971172	0.0691489812051614	0.296293291825104	0.18697092185685	1.109525302106	0.568402150046831	0.277014974013828	0.191900838581194	0.255927017821151	0.205788327709356	0.00435557727374138	0.0611439310322689	0.148350900813522	0.83170062618076	0.0880552743619988
2008042	5	0.180775766304802	0.0768607476317729	0.0720176838193481	0.101145559852411	0.184761003272754	0.0660354525199198	0.371171575245287	0.1844633672896	1.09695498837511	0.546161601519552	0.300544365182349	0.184164761638803	0.242756625222936	0.215834477350011	0.0027272466849729	0.0653159167329837	0.156647630500279	0.761269294573182	0.0907932464469733
2008042	6	0.176307857033025	0.0736819701151643	0.0671364090074364	0.0971604262256099	0.182529549336769	0.0633747377101454	0.43510538707164	0.181715551088267	1.03461005502402	0.513909850407244	0.331752450041306	0.180938705846556	0.228586352397238	0.224358659940298	0.00194159631004371	0.0691930896328405	0.162050012948225	0.608703134626839	0.0931263574092274
2008042	7	0.172785544656201	0.0705245001827718	0.0610877620857759	0.0927880360293308	0.179374775482592	0.0590418242885902	0.531149867292585	0.178582223391356	0.973609659116661	0.487065402098565	0.353994484971534	0.179896280937908	0.212638379814068	0.228915548716706	0.00146961177545535	0.0713899288788666	0.162759390340322	0.423462466240565	0.0927462462509774
2008042	8	0.169443339005053	0.0672378552441761	0.0634532538877396	0.0938882567962181	0.175661870652405	0.0545649349263659	0.695369296072064	0.176336485446813	0.950786407805476	0.492611967602939	0.381454814978608	0.179501032619725	0.20387308635298	0.229114116960043	0.000875223324585875	0.0729043615283135	0.161378527863995	0.303990027481798	0.0986008126767637
2008042	9	0.165641712227332	0.0637995447521046	0.066614744388037	0.100759547580349	0.172442093579436	0.0585072739802742	0.718182266817593	0.175278836653581	0.917539769823498	0.544042976819915	0.394365366413573	0.177751793342639	0.197391674181285	0.226986878114447	0.000634351453605764	0.122833413123036	0.156019035035627	0.251900811763067	0.10503100094485
2008042	10	0.161382373334445	0.0980184057415249	0.0678964386790386	0.12925492126141	0.171742500201705	0.0674801458776099	0.70679326718849	0.176323670764635	0.862041373597838	0.531905026037568	0.402385557040619	0.172363646489218	0.179310945114289	0.226505617731414	0.000443208892554895	0.125222159084415	0.149166245344057	0.228492905525706	0.107574672054732
2008042	11	0.155942868585754	0.155569335811272	0.069021174592728	0.160537324025483	0.177810509239323	0.0748597642026408	0.658872838324113	0.190127600749756	0.698765370929473	0.535196639262499	0.398064625944106	0.162232681423188	0.167036000468971	0.225861830323713	0.000245250291355355	0.119333055464398	0.142645989400527	0.217507666163347	0.141481202600246
2008042	12	0.148825245150285	0.201390365460493	0.0699836776527059	0.19275307046945	0.193254109760929	0.0864416067693096	0.572897611716692	0.238245252260275	0.511709359240448	0.53430014413277	0.380006544321565	0.149921428575861	0.162740948083592	0.223933425980198	0.000136426195246478	0.114821422454724	0.136575527712854	0.208118989524165	0.157212918758904
2008042	13	0.141839643549879	0.209170453970401	0.0676562363743291	0.20404029946778	0.222450330996271	0.0915104207845441	0.511355306681001	0.332129254681623	0.369526976643472	0.52180799876651	0.359938224315538	0.136832285436538	0.169167973454651	0.221611837665133	8.10574870949888e-05	0.113593513711839	0.133766119384487	0.204538356559669	0.158410005220235
2008042	14	0.136486322172022	0.216039036642989	0.0637050386015759	0.209011996598793	0.269472540163612	0.09146247884611	0.477657302859591	0.462673310557849	0.293288012347681	0.485544803441177	0.348148524223367	0.124640676540708	0.171033784552995	0.22002560359868	5.23392356890155e-05	0.112493473521783	0.132490851003221	0.213628387390322	0.156436821786471
2008042	15	0.136589417029357	0.210087769306484	0.0598722819802926	0.197996917575098	0.33676532780039	0.0882692290020836	0.478549495528777	0.617053518064725	0.265238864178937	0.446585675101579	0.33904903135475	0.118253279997033	0.170376851888189	0.220560678420653	3.30158399629558e-05	0.104940663087274	0.132763143316876	0.239252506328236	0.150172800721112
2008042	16	0.141400524947201	0.195005476561565	0.0550037703163461	0.1870998430627	0.427249742672102	0.0828079817411613	0.508341365978508	0.741914367341887	0.254995570978789	0.414790134019192	0.330865197713914	0.114262788369559	0.170057141983937	0.22384430393938	1.76212468355467e-05	0.0948297164580519	0.135881940569857	0.263729928276989	0.145089139362276
2008042	17	0.158707582223787	0.185303858644946	0.0488619972141536	0.171217970435351	0.55006528331497	0.0767179735879486	0.53514347689135	0.804406188367102	0.244130767849466	0.399786344075532	0.321447982449448	0.110355294837766	0.167643343053524	0.233899956168657	7.79560681191995e-06	0.0829560341235959	0.142101007929079	0.277723418900693	0.136827711994642
2008042	18	0.183733011922225	0.177060543328477	0.0425992842663346	0.156850113954251	0.698305933570518	0.0705412272956842	0.516022904783907	0.82526923426672	0.243673891659603	0.396016763545506	0.312888917238551	0.105747428678008	0.164739083328586	0.252822429902255	2.98761303445239e-06	0.0697244676715119	0.148867341071647	0.283040262208454	0.129698608782479
2008042	19	0.22824580889119	0.167251761060751	0.0376830756691684	0.145080205516311	0.82409165248664	0.0641811043800412	0.483787034357011	0.825638191479552	0.254771322145588	0.39786831514043	0.306138678520926	0.102814291992843	0.161472023637546	0.276132901362158	1.19817617929699e-06	0.0573645679202513	0.157397502248277	0.284748625835116	0.12280446135885
2008042	20	0.333832206575419	0.156445287640993	0.0342970604364487	0.13534719484724	0.838670855473705	0.0579426649810326	0.440395638102079	0.820575321075707	0.269435819421915	0.405822005809515	0.298697257645028	0.0986517870570807	0.161155333249592	0.306948240274664	5.94346064700943e-07	0.0478777657653999	0.178952289612091	0.28509390546128	0.116875862741711
2008042	21	0.565856800778954	0.146252503397276	0.0315585366640174	0.125434508065519	0.781939088767514	0.0522711417445905	0.394695336953764	0.804136233653803	0.28215594600993	0.416871439357842	0.290260272570286	0.0952645828564305	0.165434801393414	0.341861427667585	3.80406105761122e-07	0.0416084783149233	0.233744595373202	0.285716224942029	0.112305277112385
2008042	22	0.661020956609708	0.136490708281923	0.0292159382545809	0.115111572117406	0.592897444379994	0.0473378953660776	0.344685735229139	0.807849798232119	0.289299648975337	0.43410008872313	0.282552072787861	0.0940390863166043	0.171109983206334	0.370693500540251	2.94998146825095e-07	0.0379774160977273	0.310128548285595	0.284537248618733	0.10886103690851
2008042	23	0.728774474451776	0.127305618926328	0.0272988068178166	0.105882250759678	0.34773358680966	0.0435934259644091	0.299043836772146	0.804867389112414	0.291407969360763	0.451733161034785	0.275396176834194	0.0932090166782873	0.179469714636119	0.394289796555007	2.59305976123496e-07	0.0364799379735646	0.367395846914859	0.281695504021466	0.106183760220975
2008043	0	0.796303713089562	0.119206275832769	0.0258155779224729	0.0981236184887225	0.294027091047885	0.0414739562797805	0.262219571352141	0.822772842243314	0.291620957223555	0.469646287797033	0.269307695079565	0.0919039877241288	0.190467702929156	0.414210512784845	2.39608537576061e-07	0.0364677004518871	0.394427842290766	0.278678730876691	0.104028575038024
2008043	1	0.824187691275993	0.110742450798894	0.0248179725228171	0.0913999849586602	0.290346374201601	0.0411277511157297	0.233367427006247	0.821267318457042	0.291036823696057	0.487618619357977	0.263850623476138	0.08989406657439	0.197476459058534	0.425765343363942	2.33297247115466e-07	0.0369475958046007	0.397791993344333	0.278235601186654	0.101986104459394
2008043	2	0.824813569358105	0.100639640765595	0.0242442740803591	0.0857803837739608	0.30976615812341	0.0418750212875571	0.211253669254577	0.798140757349283	0.289932607826448	0.50501602360997	0.259307077120802	0.0877919610629849	0.211774444346431	0.427751766411917	2.40554808646199e-07	0.037112846577297	0.389823810305094	0.277458182478022	0.0993837289963821
2008043	3	0.813122628454819	0.091082343768141	0.0240170056494747	0.0807485443391758	0.341532472945282	0.042870480134529	0.194891363573796	0.661742859339628	0.288516036184996	0.517495902349756	0.256059044581787	0.0858680165372993	0.219997382431238	0.414229832620013	2.5124966805879e-07	0.0366890251004258	0.380411814309583	0.277158631288957	0.0973510335306774
2008043	4	0.784158525656546	0.0824950100289343	0.0240243496577107	0.0774494081229452	0.365203136073534	0.0433764832486941	0.186107902539166	0.51984713531296	0.286882406597787	0.527200429904203	0.253549276254076	0.0829329719637953	0.220998908899342	0.39197568002976	2.77369376549036e-07	0.0354242195313374	0.368112052235614	0.276783670310146	0.0971710742510651
2008043	5	0.726965110564751	0.075134248832671	0.0241660615501461	0.0794073956099473	0.372027703786652	0.0434727280048512	0.185389123923356	0.415885273056808	0.285368620730272	0.536710606828589	0.249550894556076	0.0790374685485767	0.215529055292268	0.368243308146109	3.10373476565723e-07	0.0330008977487479	0.348115496211567	0.276788638915041	0.098433878001679
2008043	6	0.664473984778989	0.0695260021393185	0.0242521565455327	0.0926115318619129	0.370388912498728	0.043308019003861	0.194709093668712	0.374910100372303	0.284042463893292	0.551284114858707	0.242755259206232	0.0755356708475703	0.216028778409563	0.347041697387723	3.05986160447202e-07	0.0293982203681687	0.320887691909668	0.272526143420609	0.0987968410100182
2008043	7	0.620878243490971	0.064661634616134	0.0241590914688645	0.112629895661894	0.366044607230684	0.0427758618453735	0.261725570382069	0.35584336092553	0.284221302585694	0.571856189882297	0.234709476508469	0.0717132709105814	0.222062594524119	0.328018807041771	2.63084390770213e-07	0.0254730934381798	0.288782467771894	0.26476124512928	0.0993095306045984
2008043	8	0.580500738653469	0.0607408145847068	0.0241709429565786	0.131968645455321	0.360050435752772	0.0418739285712585	0.3829264698691	0.339427459718167	0.287567618545356	0.561827158755729	0.232214640623085	0.068090842272375	0.230903608474877	0.308731168059302	2.22553945279887e-07	0.02207536741442	0.260680057523519	0.26375142464146	0.101909254938365
2008043	9	0.537156695020139	0.0583084353920673	0.0370589076572793	0.178771930206724	0.353774918861266	0.045861132786365	0.477649967980471	0.317881858041519	0.296414103909298	0.537245925303513	0.256647768087458	0.0645953442263745	0.237897563684554	0.282648271298652	5.09814666368375e-07	0.0191660730383974	0.245183394143709	0.2695973199282	0.118971293571684
2008043	10	0.500486790376311	0.058855424496867	0.0441011634805729	0.161081406652037	0.345977834219708	0.0746296325817262	0.455481639447805	0.321833271242683	0.309426915248296	0.541774603858387	0.356394598775907	0.0607867119152459	0.218008818678879	0.301988849439582	6.22105599141885e-07	0.0166912158956781	0.239043588341899	0.272012543540546	0.169531631831804
2008043	11	0.473435705745374	0.122884437543947	0.0487541290670549	0.165036912314558	0.336206033996239	0.0993160016056388	0.420739348000989	0.335675421645792	0.319524171367834	0.529875678783562	0.642021620726204	0.0576162263025252	0.193280695725791	0.261121939568444	8.84876547882142e-07	0.0161632161729023	0.239505853257545	0.294597161893619	0.247341484139222
2008043	12	0.456980693695603	0.350233438009059	0.0491384100065848	0.152105641864634	0.326101405393746	0.101548110150539	0.3826696017614	0.343472909410397	0.325718713047474	0.490889535655002	1.33667116956635	0.0565773905833044	0.17025265961052	0.241775367862751	1.57231939036587e-06	0.0181204588137669	0.242781353777032	0.307238066615317	0.35652916762098
2008043	13	0.448221997704101	0.314893312333325	0.0465999070769305	0.131281332923164	0.317516663643779	0.109732383403575	0.356959023424087	0.348003923830421	0.303253863155678	0.454637892397148	2.11337119492842	0.058695524927776	0.154309483868512	0.222310540178875	1.69815776218689e-06	0.0165968142425485	0.244496605549073	0.303200157432191	0.334062215918765
2008043	14	0.443779697090792	0.284506986628294	0.0434100235091943	0.116812718419146	0.310645059308501	0.105198016139469	0.33965950913388	0.349124894715161	0.280607265324058	0.4332307093788	2.28044417961614	0.0614001428015954	0.148240415485311	0.208100796699456	1.62930346277439e-06	0.0142684931996678	0.245659648018352	0.290439242612667	0.318592048142132
2008043	15	0.440000708207524	0.263393607693611	0.0404790882830336	0.107508515170097	0.304917355766372	0.10341094874305	0.33020203474472	0.347992982510036	0.266828440726999	0.41912366922806	2.20729401083142	0.0627184040636093	0.164323248118503	0.194792786039697	1.43307949308384e-06	0.0115919828593361	0.249581682786	0.283147324107956	0.277191330234578
2008043	16	0.436627306993061	0.249652812364402	0.0369856468298261	0.100355215247017	0.298806454877596	0.101868156125114	0.325966401729311	0.345679960636285	0.255892809905923	0.401659297797159	1.96036427002443	0.0648296737278216	0.200905948737481	0.185450551541044	1.23368769787075e-06	0.00868643026337233	0.258786151706904	0.284807376706992	0.23209329575048
2008043	17	0.437987428604567	0.237599528939993	0.0314633154049501	0.0925466095046838	0.29317397574561	0.0951223892854793	0.324198650546953	0.342560601185065	0.250239429631523	0.395126748392653	1.44890213006768	0.066600564238799	0.219063157175897	0.175257845449183	1.02616164279035e-06	0.00616643804539576	0.278587928011438	0.295927353157654	0.186477477443095
2008043	18	0.439521436006456	0.222773192501988	0.0268489899382744	0.0850923746364746	0.286580420823707	0.0873730465596302	0.321329896842321	0.329573966226286	0.247334856231626	0.379464959069842	0.901135206571635	0.0697894806158468	0.221544673131643	0.163256186172908	8.48938577009364e-07	0.00423582224579336	0.30440106202911	0.308157603494688	0.144451841704361
2008043	19	0.438710004407632	0.211594782586405	0.0234272103637838	0.0802815744526306	0.278928994074899	0.0800502496266642	0.306111045488462	0.319607533424479	0.247229447954932	0.378877822561165	0.513797355044362	0.0802410761792182	0.231863994216724	0.151281125255938	9.02137909708069e-07	0.00281016880283116	0.331975700762507	0.311637998056906	0.113849539113375
2008043	20	0.435102384564438	0.20071476836143	0.0208796931918509	0.0788077166551637	0.270593090124294	0.0734242304783576	0.281447227315789	0.307729065351709	0.248088813579981	0.37719907857861	0.28181798649714	0.110044565214764	0.214193269428606	0.140467958019977	8.31437397285726e-07	0.00188850445341263	0.345699621017029	0.310188440005391	0.0965739340924636
2008043	21	0.432355189389585	0.191985037681467	0.0188961651859576	0.0792233082447498	0.262362840979115	0.0675431277904824	0.264359515880366	0.268770777622188	0.250460278680863	0.362138962301728	0.14503436065669	0.144990990196282	0.183937449372803	0.131198015158725	2.43159290946996e-06	0.00136066593888297	0.347117166855988	0.316831895055004	0.0877608527295295
2008043	22	0.431918962378259	0.184555528505172	0.0173960213749015	0.0849206135983085	0.257855352333052	0.0624784160449107	0.257525065446745	0.232862336367448	0.265389846689288	0.332546732118837	0.109916274619294	0.160058876981879	0.144688108059923	0.123253245526863	4.39456741850139e-05	0.00107087778321937	0.339476145910922	0.346977233577223	0.0843463590669219
2008043	23	0.430639167861791	0.177847923404168	0.0162397759767801	0.0886098981509939	0.26870211701544	0.0582231384221424	0.264533047896606	0.224179614372557	0.304684067442317	0.278396748744653	0.119498777597942	0.184633601156034	0.11633998368677	0.11626554538974	0.000628709569606478	0.000945713018910912	0.323979121127087	0.353119482256633	0.0901086218438405
2008044	0	0.422707092941141	0.170736581319593	0.0154204247380316	0.0857615798161546	0.292679037514345	0.0547283498786562	0.274787306603724	0.218700708750917	0.340909158302476	0.199173945960692	0.176658422079022	0.278528655251558	0.0966980778817149	0.106702102524151	0.00351629789547227	0.000913545924402684	0.303223372483219	0.334580238413936	0.123572073095928
2008044	1	0.405997595008563	0.163215748729414	0.0149115522846796	0.0828864517172395	0.235333101085841	0.0520731611931353	0.277467852647916	0.208586169408842	0.33334618802911	0.15655200760227	0.197894867113756	0.465827701071154	0.0824934655494387	0.0964270319393851	0.0109935911101419	0.000909681486359733	0.277394404152333	0.255552422759861	0.182602265703686
2008044	2	0.392564071512645	0.15442292857188	0.0146895621258165	0.0807227004372495	0.223024930955227	0.049642488631957	0.265346841763276	0.204824875772293	0.293190020084291	0.142150774650058	0.198656364149899	0.737063956065064	0.0741376937183087	0.0910134870037576	0.0272009170839403	0.000913514970976677	0.25059458370349	0.162308509435545	0.243132819667017
2008044	3	0.380146540529993	0.144288974110248	0.0148790050312262	0.079168922301691	0.221622380026967	0.0471502290270393	0.214811418417222	0.201284264083514	0.213333099699803	0.135674319808693	0.189541362392381	0.949913005579067	0.0709034657401546	0.0914183474316746	0.0518504729915012	0.000954253526630092	0.23971480970828	0.146711771327245	0.290301749029676
2008044	4	0.3557837365139	0.135855642515177	0.0154393951906322	0.0781462279877611	0.218548426850018	0.0450408298647483	0.152289852063528	0.194906928320484	0.168614414207668	0.147387841798216	0.160132447386197	0.799861062901466	0.0786787410242111	0.0948914714020656	0.0793848087235803	0.00107701811470925	0.237118923718854	0.168397158536621	0.313031865232809
2008044	5	0.315424984509734	0.128722715940167	0.0161589161954435	0.0783373021276785	0.210247838420816	0.0433059584748208	0.123181347057296	0.199435820730618	0.149148802249026	0.167624240482099	0.130852290708123	0.261217165929732	0.0908884766547306	0.0977354433286308	0.132074616921157	0.00131471490110763	0.241166059235983	0.246646757838635	0.318430197349869
2008044	6	0.250546717122011	0.122236873780279	0.0168160464811027	0.0790149818342801	0.19819951879635	0.0417920975595977	0.117588567312675	0.224357344273597	0.150112410898244	0.179534470708347	0.11229172680411	0.0955764551830935	0.106715613670462	0.0979026504884274	0.173579410491689	0.0017193078009723	0.228231365682137	0.293874423698236	0.314591212953349
2008044	7	0.182574510387749	0.115621875853651	0.0172384958757873	0.077549332471379	0.179247113207023	0.0403773070558924	0.128461631059115	0.259663738660511	0.193725525894717	0.180281059583144	0.109581359704341	0.0877513594717937	0.111910810399144	0.0965700509782932	0.188083345658617	0.0023909948048978	0.195123260233355	0.284057663183359	0.299928982963738
2008044	8	0.157706881729382	0.129091351508269	0.0174214412487087	0.101672331711786	0.159789327706948	0.0389079615404969	0.141365506411586	0.287986424991353	0.253452716980533	0.169087858675292	0.182407551597416	0.0913858296021172	0.143141406798695	0.093554208362606	0.200588031007919	0.00346288767738372	0.145699423660224	0.251241896324793	0.280727172019406
2008044	9	0.15806784138868	0.171178335827673	0.0250448430751153	0.249661118362306	0.153661899256386	0.0522091902404426	0.15553636228923	0.29051782305599	0.27561216807347	0.175596159506117	0.277390030531843	0.0976053283540147	0.190587860271619	0.089307728531308	0.208644915200955	0.00470581332714142	0.140583126338269	0.230501673400472	0.267898414613685
2008044	10	0.178593736808996	0.223901631487182	0.0254286439941486	0.226240631226831	0.167523927103619	0.0596206722497884	0.249583113913017	0.271101710268323	0.269569652475376	0.306927047964781	0.234424853218998	0.0902483984613973	0.246026263872521	0.0845625858436418	0.209683445128189	0.00591356616605188	0.156478781799699	0.218965625693162	0.308110079962575
2008044	11	0.20000293265087	0.21921150425635	0.0253854921001573	0.19723401757226	0.192221322918043	0.0588658524688923	0.593730703830897	0.243433813619569	0.245136797488359	0.932595329184878	0.330996810145827	0.0990304513850909	0.421963593244652	0.0800805677913808	0.195733955954399	0.0131032386101529	0.178899656114972	0.200224312248497	0.314169087415531
2008044	12	0.205783631003032	0.206961902408315	0.0260423478852239	0.181921840289843	0.212439572692978	0.0547565800630579	0.877351288396661	0.208693551924336	0.225813053077248	1.66957805006045	0.44399443089367	0.143293086722839	0.754276093999833	0.076267265744142	0.174806827333295	0.0140381688775399	0.196374360423392	0.181125889151235	0.306430689075688
2008044	13	0.204194420081462	0.19443024238495	0.0253913576332934	0.178615186014189	0.217973161404952	0.0551332408014659	0.963153432498191	0.170217190945346	0.229140302512916	1.90490032371885	0.587695770967887	0.124466858567225	0.819229959467513	0.0769828817583829	0.158801112108881	0.0135463603115803	0.194984415882575	0.159795702649561	0.286615091970522
2008044	14	0.18742371231671	0.183710947851557	0.0247216673228514	0.172485083648606	0.201420014243628	0.0664178659705878	0.911999751170627	0.156006337087495	0.227381916679189	1.93877872811138	0.768633822165165	0.166759669421886	0.824641627297123	0.0738495493826929	0.145678131077626	0.0122710990673584	0.177008397777049	0.141626578300988	0.250847242055731
2008044	15	0.176072831072533	0.175896526018058	0.0234274515297304	0.162166977750202	0.175598712017247	0.0917619171302895	0.720515317830631	0.155440835812232	0.203840638046577	1.87347764239619	0.985058630513341	0.159270303046876	0.799880634061656	0.0722571971041059	0.13089047546394	0.00866340142245302	0.175166887637834	0.132339696302944	0.23039490472665
2008044	16	0.191302089280754	0.172463155363638	0.0210643346041607	0.157787911875167	0.15142269811815	0.132386786320062	0.452566519619395	0.161567939177792	0.156135844422206	1.72051563833307	0.960012905024974	0.196998647724144	0.755449090865429	0.0716002028256741	0.113566248694204	0.00455529818026597	0.179168607134867	0.129645591954464	0.218662661749787
2008044	17	0.583413688422967	0.174214115374618	0.0182113097331188	0.160359593922557	0.143185061642338	0.169604001217439	0.251303974664489	0.202982615367432	0.130819521497294	1.50565143833664	1.07379868006417	0.205584841923226	0.722886749126734	0.0716775528119546	0.0946111207179771	0.00273624559683497	0.171597192465299	0.129120259044247	0.204767930900867
2008044	18	1.69608126455918	0.16749464711102	0.0160707263885243	0.147878863124515	0.147995838119723	0.186128212011671	0.135789368093728	0.4328976391119	0.129446863636421	1.27828432956937	1.18245230453031	0.153070511574159	0.691765642358481	0.077883075516401	0.0799344435418005	0.00375857343176935	0.15758668740052	0.136409983265485	0.185058546507798
2008044	19	2.27883568041865	0.161576090522528	0.0145514527537592	0.136985143863039	0.151017408348572	0.190661470720022	0.097802189848774	0.677951481272616	0.131593280059998	1.02539164545137	1.26702053682307	0.169369847634815	0.67217708253739	0.118154424578562	0.0685018588462331	0.00516454504852391	0.15097969066892	0.161587334280891	0.17000278374748
2008044	20	2.3440118708093	0.157489434529855	0.0133429793144148	0.127413201383292	0.142059196219539	0.19079604282834	0.0870104572844752	0.729833329579369	0.144654943325612	0.744978920082036	1.31123870677748	0.190333270382542	0.6928357480051	0.142378838218092	0.0579528542688096	0.0059265692957808	0.15804751902327	0.180623101330695	0.159419295324529
2008044	21	2.35043834519672	0.155008064637357	0.01225414596195	0.119994752457059	0.11884072090639	0.178422167980267	0.0875836386178159	0.634626160980987	0.172184345102177	0.444411226797016	1.37235368470345	0.176901887470977	0.527263045637923	0.147263238920477	0.0484417188460145	0.0070931780972021	0.171250597483502	0.207626501545921	0.151763940004853
2008044	22	2.32764062550832	0.15515961064969	0.0112810471435261	0.114332256181298	0.116140492993972	0.168575850481283	0.0976119677663691	0.347304472052172	0.19141924193436	0.169701449610764	1.49736671609552	0.170879898583011	0.248076148774434	0.150731955646077	0.03753025440441	0.0117232382548211	0.199827614220653	0.223895842073088	0.146463724999021
2008044	23	2.26611680739441	0.157538079179609	0.0104567899444784	0.109996116637943	0.136479031905949	0.165728395528862	0.10490441293389	0.207581413592275	0.203452929796876	0.101860525289448	1.60049828355184	0.221493505302305	0.148850757147659	0.152233892135238	0.0338159054260264	0.0357272793565299	0.2424422673062	0.220421518013138	0.142968473272349
2008045	0	2.00654076733878	0.159626028404849	0.00987132741598134	0.106962177179909	0.165192738456462	0.164146645487769	0.107898858291748	0.147076499920998	0.209702525473124	0.0854442856996977	1.65365152186496	0.240861000933118	0.150751656397533	0.152001910377595	0.0355424275372498	0.0896250071053225	0.289918696978309	0.212812003933743	0.140849584516136
2008045	1	1.51781604606701	0.158497306056422	0.00962438920468144	0.106088346858237	0.168639456894076	0.16188129763885	0.108495788295778	0.136041774713305	0.20369000142133	0.0816763141652708	1.7205584385721	0.220328666257424	0.182858348389604	0.149923230711792	0.0378621970430709	0.127655231052119	0.391554216469321	0.204038469046151	0.139336501516618
2008045	2	0.96844422468415	0.154533418923079	0.00971459176381807	0.109249239923108	0.161035155307198	0.160249802641335	0.107656624845002	0.137275558781246	0.18330161951784	0.0805896454450264	2.13044287515656	0.204061897822935	0.219751527029993	0.14648632383483	0.0380546433602931	0.156772110892603	0.533778708873152	0.165273860966952	0.137409900377392
2008045	3	0.58797040493901	0.145529241190075	0.0100441589404932	0.107152920496408	0.165262414326753	0.157733551583181	0.109216354618988	0.152560835417289	0.173287389012799	0.0812826810108474	2.31925988957818	0.2021900115458	0.215614923540189	0.142705406106142	0.0314349216779502	0.165594922450039	0.563076919052215	0.115502607977558	0.134942712992424
2008045	4	0.411717603472354	0.13465338932344	0.0104534167570547	0.113520586152681	0.174707146856321	0.151987116504211	0.11609741076878	0.167244746288913	0.161806158489517	0.0835840496742551	2.24804769123552	0.211897520697667	0.170773650691054	0.139215778389994	0.036130528328591	0.166537894625332	0.494324602106183	0.104029805238971	0.131927052256473
2008045	5	0.319046444480598	0.12155062586836	0.0107381626542122	0.122327873969537	0.185156101894786	0.143102990436011	0.121377457187629	0.167130488706703	0.138631849550087	0.0884141241126113	2.08302215779502	0.218437877881266	0.138395856286409	0.13600647607846	0.105427758213057	0.16323423857118	0.360213823669271	0.115765223747509	0.128459235420407
2008045	6	0.237214193092852	0.104836662731933	0.0107923996435254	0.120559865448388	0.189495926189133	0.129141843202462	0.12954502173539	0.162015098386606	0.114918697060827	0.0930939250224702	1.90684148538132	0.219874249047647	0.133896735207383	0.132528870488086	0.142655114583253	0.156769379590718	0.32381255405214	0.128476756710138	0.124775905601767
2008045	7	0.171027991732395	0.0902717710040793	0.0106768773884123	0.128068777451612	0.189598569224086	0.12139381925439	0.134549534510994	0.163240233775357	0.108827564195241	0.100966509861717	1.66840393194609	0.190630487631627	0.137294084903327	0.128262441461006	0.132221477849796	0.149445818594892	0.384685766633619	0.151481966978778	0.120629937435823
2008045	8	0.143023782112058	0.0828165312631181	0.0105091243051469	0.1356882998388	0.191608526541675	0.107285382952898	0.134929015404428	0.170236436180066	0.120699933685845	0.104947999716325	1.51544347076555	0.154100697805354	0.153493765642114	0.123324812172113	0.124374235572841	0.143248156385489	0.431027072219349	0.185915920421231	0.116414185336718
2008045	9	0.144013527369386	0.106341761668778	0.0102362956352675	0.131543160155986	0.199097438325914	0.0948022347644907	0.132379092407435	0.176719052942133	0.130644360340587	0.105277207479367	1.43434750459622	0.143789230432113	0.182050042562933	0.118575531843249	0.113209376341842	0.13748445609446	0.422312492657338	0.240956167488256	0.112036441122258
2008045	10	0.147954836164149	0.117689128998126	0.0096828505750807	0.134089098289791	0.206985019943849	0.082055608168044	0.127521553050342	0.179993955727984	0.157709889631043	0.109119175011017	1.40918781404012	0.149063729043742	0.223104668007201	0.114637130448777	0.0995792749217267	0.130788143207303	0.391957689362989	0.307757055292175	0.107262165329817
2008045	11	0.149401328431151	0.100780998944136	0.018241410690386	0.156570337863437	0.209102498333556	0.0791777511760215	0.11836561637394	0.180201160887019	0.20156384327429	0.115119086756461	1.43211637232842	0.153963537884825	0.277904780639301	0.111677421894728	0.0899951437184693	0.122582137843181	0.357931945949158	0.384253494360971	0.102191332667877
2008045	12	0.141533089290479	0.0823158134526648	0.0221571598417624	0.163268285317367	0.203278683919493	0.101202652332543	0.108742205934365	0.178861574948159	0.258224475210905	0.122435037776506	1.48869561331966	0.159460639517134	0.326076728587872	0.109251341079821	0.115939195905218	0.10919444252501	0.337883415697662	0.474508280865228	0.0965496580805801
2008045	13	0.133201128068705	0.0808873032091903	0.019933763670343	0.154320083998906	0.194306763376661	0.100909044489295	0.107836090099217	0.175965675576517	0.321531927311407	0.124200573926524	1.52866585082304	0.162733560151529	0.374673579113743	0.145333522772699	0.146244258916577	0.0911038575553124	0.365457728517407	0.642062600529092	0.142723913797096
2008045	14	0.131295697900048	0.0865202288241612	0.0179235110182911	0.136785048186355	0.186193511107163	0.091731714593956	0.109488939648946	0.172229474212336	0.399517248063976	0.121608026779891	1.55852331645723	0.137083187280475	0.40060251232432	0.154876736312401	0.140704612486004	0.0707493963049427	0.430021388987513	0.845426595799394	0.146633115061492
2008045	15	0.133269584511123	0.0993627349910889	0.0158976447360488	0.11902614789119	0.180679279956067	0.0903324099525095	0.115297192893469	0.169469651938394	0.540863186230033	0.116704394925736	1.54674326813253	0.110329071609115	0.425920206733458	0.152503617982367	0.131204146843289	0.0637982521285882	0.618390520394629	0.969752059356252	0.142854973208671
2008045	16	0.138081157134367	0.118015957760487	0.0136341146201813	0.110057440311585	0.181694905571477	0.0869221264537776	0.120680800594453	0.168971296111284	0.666221316596308	0.109811435447269	1.48780460988707	0.192269431387238	0.493828271358084	0.152106538030521	0.135827260330813	0.0678898723761061	0.998604516237256	1.03146632191649	0.132505301788899
2008045	17	0.145794412724068	0.1262076474954	0.0113640553502443	0.108226284910576	0.174038953034703	0.0808801029961394	0.143274068934964	0.168015474103507	0.799340685668634	0.105288097170683	1.40851479246026	0.177859603289957	0.606968715028063	0.162820047768673	0.124415496248161	0.0732490600529817	1.11095613212714	1.09801120066078	0.117156010921433
2008045	18	0.146655046755503	0.128011182000347	0.00969946645911798	0.103877376068817	0.161659227388281	0.0799533072952019	0.200385116825426	0.170454430875205	0.933524988106881	0.10339356130483	1.35188598735457	0.121513034202146	0.742959339082617	0.232293875289528	0.127169840515545	0.0765572276900762	1.01820431170637	1.16306262973342	0.107562448638684
2008045	19	0.145435679916564	0.130304455997262	0.00845266902414729	0.0988079077668398	0.152240084831033	0.0879069158171898	0.280102290223795	0.171552008171138	1.03147561004866	0.103050776453146	1.23824763034955	0.0817313637430737	0.864158113015323	0.492475508866428	0.161396244425567	0.0932898621264357	0.932644923866401	1.2176884395148	0.103964188954367
2008045	20	0.144352219150302	0.134909466895002	0.00750881448951109	0.0922138182206329	0.153304203441901	0.107418333381407	0.384507583494478	0.17390871731228	1.12771109904286	0.118903603317708	0.971471709183443	0.0610272978458319	0.893776109324512	1.19359672384764	0.215768529493458	0.095923242013471	0.942127207906177	1.24637348845963	0.112999270507947
2008045	21	0.146409316049241	0.129284842439876	0.00679397650642308	0.0864294043198691	0.186442882490552	0.121204091702463	0.558447161995646	0.164779906075546	1.20418155730527	0.193020957301196	0.769080269928084	0.0524368305697471	0.87803889655822	1.62760781086174	0.259727565620876	0.0779488599455855	0.927759878974545	1.23252166436017	0.183846032706457
2008045	22	0.153364374816282	0.109075535439524	0.00625185620200029	0.0852364564280761	0.331326502000881	0.123989410906051	0.779947836403645	0.154856220612851	1.23674968555964	0.341602485618092	0.636792886947106	0.051527688237657	0.838430748604137	1.75485780962044	0.315567782621862	0.0696324956009715	0.930991233140041	1.19383710466739	0.393675731828782
2008045	23	0.171437001244254	0.100087930491056	0.00583244372584157	0.0899185620209524	0.536796875269309	0.10658072558884	0.946960836272597	0.193474252858895	1.22022531736451	0.54194861241619	0.556107347320148	0.0559900041536638	0.75076639603371	1.75464918761247	0.397679064185901	0.0643583798879791	0.937332650536201	1.11276674657665	0.706575119716996
2008046	0	0.177384646722111	0.105365751683177	0.00550917648822062	0.100638395016171	0.729467178985021	0.0774848820202603	1.04561091336663	0.349713065748293	1.17557075546188	0.77586010151827	0.514671093810957	0.0580647162423695	0.654056966288666	1.72670466239421	0.425913889141934	0.059471560796379	0.922542105261733	0.987670403525701	1.01269411114003
2008046	1	0.171736274365226	0.106375749486332	0.00527005872030226	0.125963913829764	0.913249516418672	0.0577301605341134	1.12025367247731	0.575976214238901	1.08750760218634	0.953049756662394	0.549926231675752	0.0613364446839891	0.613410158567732	1.69191472950199	0.464244883270015	0.0541340945125286	0.981614014393049	0.892191527658414	1.10240950729016
2008046	2	0.19222981409053	0.100287156222159	0.0050774078472284	0.221156674321089	0.942824336816895	0.0453831113315861	1.1730601237868	0.800405600487713	0.980690427662548	1.03058031345911	0.663996183754998	0.0593825952302523	0.567011707676278	1.66002587352203	0.453107929293048	0.044632995974747	1.08530709891461	0.838833664463959	0.801811864078091
2008046	3	0.306727968221817	0.104063986176532	0.00490510893785	0.39892671184283	0.877216011776055	0.0423950181558473	1.19883434524506	0.956204760649935	0.878525315455988	1.10253339720974	0.727642242958109	0.0496841617955445	0.485993474748569	1.63149362650773	0.388476023193908	0.033711297515503	1.27059909332723	0.783576685652682	0.51461753831026
2008046	4	0.493591007958527	0.1153959486917	0.00472438061046572	0.626292484340995	0.761595025432642	0.0489636052824096	1.18872945697436	1.02229866749592	0.777167021105676	1.16971719876116	0.63797865891411	0.0403491122447425	0.41267774260382	1.60870135930339	0.355630622689232	0.0317685931341411	1.34942281129496	0.687681382222965	0.280952872425644
2008046	5	0.649833198172336	0.124358906196162	0.00453345085286203	0.788596615241902	0.689592968704952	0.0902179265009328	1.15659033182606	0.989269762705546	0.682359824979693	1.19952927071782	0.527871403408756	0.0376704087998191	0.388106522304248	1.58859342561947	0.384242820696161	0.0887463436212298	1.40597812824335	0.64307014737156	0.161793855221306
2008046	6	0.800136242903933	0.14919804883293	0.00433807662182035	0.782245579606877	0.644423279695951	0.124436857031429	1.10114059582265	0.924275205220496	0.63736587706522	1.21516132011837	0.466160377378509	0.0373492684132576	0.384592981298832	1.57493439059213	0.462922478983924	0.228549762867142	1.43391043689726	0.622364314379365	0.118108965470794
2008046	7	0.93132077210175	0.315393777434909	0.00414383464508798	0.67251477936635	0.59200491072916	0.125655744190799	1.02973712547996	0.876448050168022	0.653530031765687	1.20768646458481	0.436391996022889	0.0385797037032527	0.417071448795394	1.56794346291469	0.419792804875705	0.327151098766672	1.38598895621574	0.621476169962627	0.121838774571358
2008046	8	1.00076957086615	0.619601003276011	0.00473624211953817	0.537347147247597	0.558004146044446	0.172667443461114	0.940227843742929	0.844253308451357	0.67811569851501	1.17054543206557	0.462997158447155	0.0381526179423401	0.480756625611736	1.57042456735036	0.286878331257474	0.406700508556988	1.33750874568137	0.633634606475448	0.124837021151708
2008046	9	1.02676731663723	0.740375709219389	0.00682281224033646	0.504592487143888	0.543459765745199	0.516411088227033	0.822179282048635	0.811467713054956	0.712246863189231	1.07677412587922	0.478546332960689	0.0376797694031176	0.589508971040707	1.57510826503874	0.281348151891465	0.511258576663837	1.29944732346335	0.659827736814074	0.0942446330707128
2008046	10	1.0194271935721	0.732039934972536	0.0168966277459072	0.464871009753941	0.549789734477587	0.652998819405596	0.742058010323494	0.759956537640585	0.757326009602239	0.947362238292168	0.474187315806164	0.0402316548534048	0.768797140985295	1.55901448900454	0.204239237530021	0.473000658379335	1.26304608088229	0.728292493503534	0.105020087265228
2008046	11	0.990227849250238	0.640434137086944	0.0550357466561312	0.397485643207389	0.553992442120208	0.609281764298922	0.704777859147699	0.707541195615055	0.793040489832216	0.850265033673407	0.449858622388942	0.0560341512144518	0.841606659742677	1.51667915307862	0.211260002264054	0.333364151951958	1.26299119231783	0.950195385206198	0.0993202759453517
2008046	12	0.94345906305163	0.511293118297874	0.0903204995919989	0.339307150856259	0.562926185451096	0.44435857197546	0.700361756160178	0.651440826561048	0.835103713073383	0.800580295166424	0.417948772468302	0.0713447475028676	0.764303406889155	1.84216771463097	0.0972193487641165	0.213224079352285	1.32844872130204	1.0316902557862	0.0942103747426008
2008046	13	0.893760358139073	0.431694144828086	0.139191951464934	0.29391981305311	0.580335970905108	0.324791162632125	0.71252988843629	0.56843583542554	0.902842336087286	0.787932003107344	0.399315388080354	0.0744357051205701	0.653536305847098	1.96429493930923	0.119477743570683	0.17872805760142	1.4593753898302	1.0658072649466	0.0899074438845039
2008046	14	0.839306986863889	0.373598726229423	0.180354303662195	0.268927068357511	0.583004142701006	0.265016851726257	0.672136390278254	0.51662661301942	0.950808422773504	0.783125487349071	0.391563621000468	0.0793236168060069	0.578623349690424	1.92587222537217	0.116775172402978	0.232070207372703	1.53712953303042	1.06350434099581	0.0771525543762993
2008046	15	0.793527999659082	0.338228271333364	0.173545028263898	0.276825928210682	0.558602680061166	0.225218980043764	0.63400124834338	0.487725430157033	0.958987383036792	0.783224084140707	0.407728762780059	0.0777394321860415	0.551479038197149	1.7903197059229	0.104183957935606	0.266173967823548	1.50526609222621	1.07385243763162	0.0603770462711658
2008046	16	0.754142996096081	0.313834791053072	0.141382706544802	0.299937330188807	0.530303483298545	0.200087502184784	0.611644411003159	0.470418356054038	0.933557247458075	0.769977436544278	0.434060464327248	0.0878278701225662	0.540415382799065	1.67687621890038	0.120494789929139	0.225914619779343	1.42050536690246	1.12828434713982	0.0535578281474154
2008046	17	0.708616814808003	0.301672332216172	0.121275151740635	0.334689292981433	0.480529310186896	0.189619488989623	0.600066368149284	0.473020282400435	0.896243381668597	0.75029449888628	0.477722843076675	0.0977254415858452	0.53625582461078	1.57998000448889	0.129620075647528	0.161943654201908	1.37236785952445	1.16678161498196	0.0523935151734228
2008046	18	0.64970364698567	0.293604728727609	0.118345850787301	0.398104997740601	0.430251208174225	0.182814363340512	0.582242497551857	0.480632611088282	0.884867308069672	0.703549118896544	0.53565580051802	0.0940352213512529	0.535292859513795	1.49339077910685	0.116059874008328	0.125155082829047	1.27594412698841	1.20686603807041	0.0664221763521023
2008046	19	0.573458007287608	0.292212824568768	0.114090395599558	0.479862830193928	0.388844452495187	0.172899018765845	0.547785930777842	0.504532962553787	0.898439946564831	0.661266846703074	0.574059375659116	0.103749489983532	0.535019698411625	1.41635018908904	0.11137422448401	0.117771853023223	1.2589858804118	1.27465347788005	0.129760176519785
2008046	20	0.491663215031711	0.306451520667449	0.103965600032494	0.553529315546445	0.350641468018756	0.144738193520161	0.507450855667093	0.514929939180064	0.906664336936683	0.625384140160241	0.578795560195682	0.121629513904179	0.529693846266661	1.34553015559664	0.170826900716891	0.142084159557857	1.29613676976688	1.31120494251058	0.231088685766142
2008046	21	0.450719379379771	0.335567549756326	0.0915177880170736	0.580748284041717	0.33502443260591	0.128313261941888	0.475903603649201	0.491765282693595	0.89997787689242	0.607052674084383	0.573596092382888	0.147691016675832	0.522326445275988	1.27221148342307	0.203905814808734	0.125191965214508	1.36949729294833	1.31546448560148	0.319764025677466
2008046	22	0.442492597291571	0.367133934845949	0.0767626421659613	0.575962059207151	0.346595512176402	0.152158344808864	0.453120440070879	0.442058275274288	0.883772417873934	0.647936717213621	0.5637752736768	0.169676871548431	0.513948048082326	1.19779260891122	0.0606510291926076	0.0955593372493134	1.3858001953904	1.29750180338813	0.357885075597419
2008046	23	0.447922324565197	0.394953114116558	0.0532864377753824	0.557104296984086	0.378977684751973	0.228747099693911	0.437375051595825	0.379165472292653	0.903258467934818	0.640322644957323	0.551168143549872	0.189263140196594	0.505093409037789	1.12517700249762	0.05120318217205	0.105180634835196	1.35317594008935	1.26866981383941	0.360229386587516
2008047	0	0.457645440120856	0.40705611356953	0.0267783535545761	0.485540733943985	0.454907603890196	0.315547170491496	0.42614766758094	0.347815968817182	0.937879710319913	0.6271219197162	0.542797099781985	0.207187045784068	0.501447338632841	1.06495704009841	0.0573561500977744	0.225094691737769	1.33866883390855	1.24084069238838	0.349192163947825
2008047	1	0.471098614501168	0.404936954231196	0.0179581267628683	0.408680360641211	0.596524396164575	0.391415743292928	0.419471103014719	0.34021063730661	0.967571497420233	0.613084553000898	0.523874347589179	0.221077768707838	0.504626752304359	1.02055327043597	0.050252694759335	0.302323486783623	1.3225963611194	1.20372634336853	0.324648319907667
2008047	2	0.484536536601044	0.402765749409414	0.0180998755013465	0.389498952721242	0.756517765604178	0.464381427381443	0.418563676275239	0.337215886468922	0.964634032729712	0.593574756707374	0.517917080046982	0.227507870948308	0.512004750629821	0.990911865163844	0.0345142790702577	0.440223509771614	1.29359869966239	1.17020544927377	0.286412961235844
2008047	3	0.503237986765629	0.403682765100856	0.0199608556144189	0.41041939259136	0.826956201898138	0.525778452265767	0.424905219821104	0.337682135247375	0.958248128822041	0.606932348324591	0.530421926329135	0.23242368558218	0.525466809078621	0.964008095310662	0.0373342678369415	0.554680054312174	1.26475455715211	1.16071541059859	0.262245501962774
2008047	4	0.523386295813223	0.396579775245512	0.0218892642323105	0.510778881071364	0.839758066193399	0.540669092647735	0.435672478300305	0.345234273044797	0.990655043121529	0.588213690102675	0.531995818229223	0.240967796995436	0.560792378728518	0.952056214149941	0.0575641247737865	0.582298357365272	1.24322312674355	1.18995796988339	0.250142042224845
2008047	5	0.538249771645362	0.385541700056826	0.0252797807926833	0.611320221454728	0.820243874920156	0.530976511824605	0.523538542660383	0.364749783303949	1.04427946463759	0.577108872606646	0.524233763276787	0.251919029765968	0.66352183612777	0.969476314774471	0.0518871108293903	0.543497723608258	1.20294940481799	1.18644991630391	0.241235889278465
2008047	6	0.553259784929687	0.369919250688176	0.0391162597736499	0.664161566367496	0.741488876135201	0.507065659604727	0.553872801812374	0.399168408144973	1.02723905432023	0.575990350976535	0.506568009204767	0.255521605955587	0.773856024566419	0.985582665817041	0.0433328607827339	0.468102246564155	1.15322259455218	1.13856023314517	0.228007947810904
2008047	7	0.566394170345805	0.349194398914236	0.0633105049310692	0.68454506974861	0.645147993899247	0.469721917547996	0.565886254319169	0.463684054290833	1.00134273773841	0.558539304248451	0.475844680685507	0.262805254176798	0.826080993353845	0.975316201266056	0.049044133285978	0.400452271954187	1.10859761396217	1.07714764383204	0.214223387132559
2008047	8	0.573984078160679	0.331184013437219	0.0935047982695536	0.665484063848538	0.560851119216662	0.465942728408321	0.647708231534118	0.563070888496656	0.97878116907478	0.556367741689141	0.428637123329588	0.277381241702856	0.851347396417436	0.964012218875399	0.0791802411535928	0.364280720759513	1.06851549107256	0.996426659986682	0.205534169790806
2008047	9	0.578337579245993	0.37274541652576	0.106481814394082	0.610454577832412	0.512059734629477	0.509598875134415	0.745832701555571	0.652628418450885	0.9591902874629	0.547941022323984	0.365465536939037	0.28879297426762	0.834286364230615	0.950145267312763	0.149968269366679	0.394892552631228	1.02580239163134	0.873087403310117	0.201241147673328
2008047	10	0.584396853821287	0.479685511079038	0.100584924780069	0.587987096157823	0.483958763456338	0.558389388419788	0.778537448007105	0.749547929991819	0.949429288610601	0.529989615653773	0.319925485207532	0.297097377259363	0.713799128391386	0.904871221306501	0.203318878510079	0.292732656525902	0.977854096539946	0.768309664100713	0.194299785019644
2008047	11	0.562639542917336	0.522632620019723	0.0868221162364937	0.613415525505526	0.470999970653587	0.595852233260355	0.797296222301349	0.797158168285828	0.934428561668032	0.50672649142407	0.353854742222559	0.323984344654763	0.590672277730759	0.829850914718291	0.165764103060086	0.233040139127727	0.936325827507761	0.717397981636543	0.17918746943743
2008047	12	0.548472881483296	0.529428012805739	0.0680011162023234	0.601456906205772	0.467014008371795	0.595830721618755	0.774575380698055	0.794820505294623	0.909409002985055	0.474007406024612	0.497908822973061	0.398713440537916	0.466867969372098	0.735940944658283	0.0890304276855583	0.195537570933206	0.903904355526014	0.708800038709299	0.16206848546671
2008047	13	0.499713351668574	0.55692519417776	0.0610609884863897	0.580920787507797	0.4718313833735	0.582755535195639	0.643430543001397	0.768425588311558	0.873725581971693	0.452588116710424	0.646046530005042	0.448328780997516	0.406818735780025	0.783677261707693	0.0741646032766883	0.164498543326253	0.872943986907227	0.714113816044741	0.147523957466345
2008047	14	0.44623007315524	0.583104730291762	0.0569905048268834	0.567783235428309	0.486569493699247	0.570729072414827	0.541252175465055	0.71296714252011	0.811873945931599	0.424785627953956	0.805876862278211	0.500934819445351	0.364417180147712	0.752376348907194	0.0738231320955237	0.137405542599776	0.83899429384215	0.704979665409022	0.132747232812402
2008047	15	0.408473571947397	0.602179758469126	0.0538441686290536	0.557204268360784	0.514730481859192	0.554718662580202	0.44782901415096	0.626394610494153	0.740327948104504	0.384946529766934	0.881143146803526	0.51020136869224	0.359389356281045	0.734026148159565	0.0765338080154896	0.112825468068044	0.798940983141289	0.65282516420215	0.120200086964418
2008047	16	0.377450234074853	0.611643759012212	0.0504421529115355	0.553428943281619	0.563098015876016	0.536933706511352	0.420253508509182	0.507354097038958	0.682609861920403	0.346404814950788	0.92219179219361	0.47591545285019	0.412503561184613	0.688605404765002	0.0744341867509526	0.0974535271968768	0.746141554959794	0.571339263699435	0.108895764226027
2008047	17	0.327857309355385	0.611626624281379	0.0446192289878786	0.546318816417661	0.623133572427396	0.515512498967311	0.408107499828177	0.393091424873968	0.600580477485743	0.311370231977522	0.97033843219529	0.381684613303951	0.469698290017212	0.635367733410866	0.0852165648916019	0.0764197137464062	0.685693386056613	0.55324699453541	0.0979022823561644
2008047	18	0.291796646742422	0.589393410895737	0.0393619998037905	0.514547506590083	0.691308025699314	0.488619006446166	0.398351901344701	0.316603653383302	0.482002225057818	0.271805528940514	1.02592117138294	0.297145101984396	0.536603053801353	0.584234926233553	0.119895693030782	0.0727897617174536	0.64427782647069	0.55937534935737	0.0909319390790951
2008047	19	0.268110841437781	0.573262787635732	0.0394657347632652	0.485247775712685	0.716571476230748	0.456653365264564	0.382974650832824	0.28120559815542	0.461226370890386	0.256744592101605	1.00188911267325	0.297877494127615	0.550824263917195	0.523072460322565	0.133461586177175	0.0699431142266955	0.617940468553616	0.551611519138408	0.0931897069959404
2008047	20	0.249392086906976	0.579637601011218	0.0427822857272055	0.501868455835226	0.695433443814001	0.420873713574479	0.332223565595283	0.261926541901158	0.444470069080421	0.251326828580475	0.913875136212711	0.383420785767811	0.531030766890003	0.461022511562373	0.130094136242406	0.0620402501676484	0.592302545786405	0.543982334685922	0.100529162435234
2008047	21	0.232611977580773	0.566692190141245	0.0476913649175383	0.487305444398593	0.664556603164173	0.382138565743854	0.267964262271789	0.242908914371647	0.411891506623446	0.263130963385835	0.800482797699744	0.488999862538336	0.476490547980872	0.408114154262142	0.116289301356642	0.0599827823356107	0.57824756770369	0.581895163315967	0.106291156997402
2008047	22	0.214318372547542	0.551296928871655	0.0517668275808946	0.484219722292164	0.639732381228385	0.34013604469808	0.244641664456368	0.223334731211313	0.391583554280865	0.292584947677894	0.75657731930965	0.500280220071953	0.406413749491921	0.370856662931259	0.106280312361936	0.0604081844676885	0.577733527441512	0.737428194175995	0.122668786621359
[truncated: 313 more rows]
