# Supplementary material for: A comparison of sea salt emission parameterizations in northwestern Europe using a chemistry transport model setup
Source: Copernicus journal article supplement (doi:10.5194/acp-16-9905-2016), 2016-08-08
Supplement: Supplementary file 2 [file acp-16-9905-2016-supplement.zip › conc/conc.timeseries.values.win2008.sp13.Na.DE0001R.csv]

doy	hour	pm2.5	pm10
2008001	0	0.348174337292448	1.88334473633526
2008001	1	0.34836919632664	1.53941311644444
2008001	2	0.338226693311348	1.23178159266733
2008001	3	0.338949994988541	1.28379402797475
2008001	4	0.363616043627685	1.48440241160397
2008001	5	0.36982725785473	1.46504430981932
2008001	6	0.367646661000759	1.51462163885075
2008001	7	0.37102392793803	1.75906707362034
2008001	8	0.354701292861478	1.96113705831769
2008001	9	0.335975373047163	2.18666629008676
2008001	10	0.328981572330959	2.34036294566456
2008001	11	0.295037577710601	1.88286769953094
2008001	12	0.256207101582819	1.42713955320737
2008001	13	0.233560924824925	1.15786942751977
2008001	14	0.220009037038629	0.983771247127167
2008001	15	0.20952494237142	0.848475949670474
2008001	16	0.201720409457712	0.769204775034135
2008001	17	0.193345416913486	0.74470089328376
2008001	18	0.189883239250766	0.746097528610084
2008001	19	0.187782609633415	0.755269616780629
2008001	20	0.187087234115148	0.754426066364188
2008001	21	0.187772106817075	0.744429114926661
2008001	22	0.187936797559845	0.726199344048647
2008001	23	0.183849305780557	0.69341442705776
2008002	0	0.177742861080703	0.651311184644306
2008002	1	0.172084370707274	0.603767081804286
2008002	2	0.172443094960963	0.582735989356306
2008002	3	0.181694601139927	0.617238848264653
2008002	4	0.202242628023347	0.67433149966867
2008002	5	0.216114347774702	0.714942084609587
2008002	6	0.222016985394343	0.716255275854558
2008002	7	0.210804152236266	0.693028762792339
2008002	8	0.177425221514405	0.631870925782414
2008002	9	0.123898383289425	0.559052126679223
2008002	10	0.0804788094109479	0.408964394712831
2008002	11	0.0800965900054449	0.348455028146508
2008002	12	0.124417257344874	0.460156611082179
2008002	13	0.138467430984041	0.456258988041535
2008002	14	0.14154405919334	0.504188519655687
2008002	15	0.146912582220852	0.553434554066259
2008002	16	0.154251152966898	0.556099884064384
2008002	17	0.175824346046788	0.541801969191424
2008002	18	0.201505747951257	0.556963048050782
2008002	19	0.201950721924694	0.694819768346867
2008002	20	0.155861108519357	0.830370825455284
2008002	21	0.0889255358568389	0.826340493570613
2008002	22	0.0758018517759065	0.740753937055526
2008002	23	0.0652958392072119	0.692806377287886
2008003	0	0.0589919325078174	0.673041229956899
2008003	1	0.0717085401344974	0.768745081684747
2008003	2	0.0733914433450593	0.831086326090702
2008003	3	0.0665192474683766	0.926129022875148
2008003	4	0.0575730377943764	0.952456756532541
2008003	5	0.0516102438977196	0.890765527412346
2008003	6	0.0528266078400277	0.91236325409098
2008003	7	0.0589037776076592	1.01697155173645
2008003	8	0.0636573823055655	1.04251112150053
2008003	9	0.0628594989870526	1.00405318690812
2008003	10	0.064855728635552	1.04743807081135
2008003	11	0.0637457826740445	1.08864583226523
2008003	12	0.0628666334117765	1.10101955205932
2008003	13	0.0600517278688946	1.1276358064214
2008003	14	0.0606740861092186	1.09776380401803
2008003	15	0.0614902994224046	1.07305607319783
2008003	16	0.0679246864516633	1.18764279216841
2008003	17	0.0786446355270238	1.32993729626763
2008003	18	0.0874326757598403	1.35395077090685
2008003	19	0.084231314767642	1.21946672535196
2008003	20	0.0760673411999255	1.15642412534813
2008003	21	0.0654142447341683	1.08556277813029
2008003	22	0.0578681737329469	1.04400078392971
2008003	23	0.0561124359228673	1.04602298453634
2008004	0	0.0578269368105862	0.968792445215378
2008004	1	0.0567871910849851	0.884305568705842
2008004	2	0.0544071003809399	0.831651749011583
2008004	3	0.0544972954697445	0.845395852585392
2008004	4	0.0551267939161748	0.868860847053621
2008004	5	0.0556440783738151	0.922223450553451
2008004	6	0.0542053410778198	0.927185099401506
2008004	7	0.0537903794939478	0.933953453893252
2008004	8	0.055271515640324	0.943028631446056
2008004	9	0.0564784780061586	0.928134986597028
2008004	10	0.0582318968542065	0.939568173081978
2008004	11	0.0596205671890887	0.9733492944794
2008004	12	0.0614931344700623	1.04838829844851
2008004	13	0.0632685751419779	1.11054958307975
2008004	14	0.0629905617290729	1.12357384704432
2008004	15	0.0644898024635233	1.13948548417714
2008004	16	0.0653746174753965	1.12027087486101
2008004	17	0.0681382216019935	1.20109378438353
2008004	18	0.066491773516907	1.27077794456233
2008004	19	0.0635737925993462	1.32287738016787
2008004	20	0.0663494611304392	1.38766112268874
2008004	21	0.0708671152442256	1.47184352605394
2008004	22	0.0762147387087369	1.58814727345542
2008004	23	0.0762030189820274	1.56397608293399
2008005	0	0.0776762307832421	1.56979812824823
2008005	1	0.0828011996044499	1.69736013067851
2008005	2	0.0893091422802473	2.00983072866848
2008005	3	0.0979013760092464	2.20103556882264
2008005	4	0.117724615056338	2.59256052284844
2008005	5	0.137095883474684	2.93754990596151
2008005	6	0.150168043477782	2.97362052147765
2008005	7	0.148685083566813	2.69828646814968
2008005	8	0.151934340085941	2.80930071343755
2008005	9	0.157682644455208	3.04934709002948
2008005	10	0.161539973061717	3.52706647628024
2008005	11	0.14157444329845	3.25366876869448
2008005	12	0.109198457360987	3.03627686751161
2008005	13	0.0915456385507014	3.03105352855358
2008005	14	0.160607799455809	4.67400988408714
2008005	15	0.202481435192287	5.31818404433831
2008005	16	0.196979406581185	5.14135527118577
2008005	17	0.209923283707472	5.13302622055362
2008005	18	0.27293891790889	5.5803999828354
2008005	19	0.349889592118521	6.24583559920126
2008005	20	0.353231225101732	6.6421636718095
2008005	21	0.286214742230588	6.00614300084672
2008005	22	0.275487933632845	5.69096592705288
2008005	23	0.407346497593482	6.92118895712585
2008006	0	0.456289809259469	7.46578959245872
2008006	1	0.507236272310007	7.28502723395629
2008006	2	0.474835052054506	6.96835461243024
2008006	3	0.381276700138348	5.45981293598222
2008006	4	0.21979468186237	3.24697638048666
2008006	5	0.210625591826337	3.30623197692714
2008006	6	0.18774602967528	3.22759119875765
2008006	7	0.150322967289518	2.95217353815787
2008006	8	0.149258777110841	2.72364634343282
2008006	9	0.148992388449654	2.75237609483645
2008006	10	0.186841581362521	3.12987270557381
2008006	11	0.315415895687243	4.25389600163287
2008006	12	0.454116114805931	5.44165548818948
2008006	13	0.579503623985259	6.06342079501013
2008006	14	0.645169345006744	6.29321723233499
2008006	15	0.669887240816699	6.21447780406734
2008006	16	0.679986397587098	5.98898322795532
2008006	17	0.675318440781913	5.52664469136086
2008006	18	0.643718458607013	4.83131041975519
2008006	19	0.597294231990609	4.10890974439808
2008006	20	0.573941427843111	3.6770602925126
2008006	21	0.586958660264051	3.58297715078896
2008006	22	0.622027847273021	3.63459692670328
2008006	23	0.634916301548348	3.65396323907814
2008007	0	0.632115512256754	3.68416239992341
2008007	1	0.613024210525258	4.06325445326869
2008007	2	0.560659964285912	4.48199563252232
2008007	3	0.491737509304098	4.24693289293216
2008007	4	0.396278368529601	3.42735079329125
2008007	5	0.305000380779665	3.19625108758424
2008007	6	0.251036634224436	3.00549853774488
2008007	7	0.215789354182582	2.80119247987096
2008007	8	0.190501854113958	2.65975624379618
2008007	9	0.161576894853111	1.96734725022024
2008007	10	0.148557419911115	1.50765665516951
2008007	11	0.13410365769028	0.746472290648087
2008007	12	0.126044601209035	0.484785244028915
2008007	13	0.120164435542539	0.393058003379183
2008007	14	0.115873293609278	0.360502904589791
2008007	15	0.11969899534413	0.379497665056438
2008007	16	0.132842158330888	0.448534357427655
2008007	17	0.144047365287227	0.467193781616589
2008007	18	0.146894285156234	0.448819446501082
2008007	19	0.121543521789206	0.648290734479146
2008007	20	0.083732358738088	0.57975384905999
2008007	21	0.179805138634576	2.73164365566392
2008007	22	0.397890731935778	6.18487035581318
2008007	23	0.383090926393076	6.19289614415252
2008008	0	0.283075445084855	5.29172248946367
2008008	1	0.196384360560294	3.91024404167448
2008008	2	0.188377461197302	3.97704110131258
2008008	3	0.236670673169589	5.94850876471199
2008008	4	0.422151268833921	9.27491477209681
2008008	5	0.642304315219022	10.6884323680074
2008008	6	0.595092110912547	9.09781304561892
2008008	7	0.433356619857942	6.42428495926314
2008008	8	0.30989689227129	5.13877146812094
2008008	9	0.172311554824102	3.02758511464484
2008008	10	0.249249102134372	3.85805513038462
2008008	11	0.37538435818254	5.83157563754632
2008008	12	0.381864089568958	5.71674960925027
2008008	13	0.366712684186012	4.9614140002546
2008008	14	0.254994787508981	3.70948493017665
2008008	15	0.197850849248982	3.0484552253042
2008008	16	0.253797433054547	3.85668388785458
2008008	17	0.390019417485876	5.23237463475407
2008008	18	0.371895592957045	5.39317335309701
2008008	19	0.312415904985377	5.92847375943299
2008008	20	0.489485324793382	7.6489993311479
2008008	21	0.681854401626576	8.91207370056872
2008008	22	0.737813381240665	9.41907571115091
2008008	23	0.672295719850834	8.36994917516175
2008009	0	0.475347329637399	5.73571005683461
2008009	1	0.368376304798384	4.58467753914589
2008009	2	0.409766359572001	5.19984011168501
2008009	3	0.399250954139425	5.4469738036649
2008009	4	0.344539321477252	5.27722243984113
2008009	5	0.325032545682547	5.30029436920183
2008009	6	0.344725140366661	5.98987824902824
2008009	7	0.465438345708902	7.77420192580078
2008009	8	0.29236485669697	6.55753831202936
2008009	9	0.301150449939977	6.47491740588332
2008009	10	0.364426404447229	6.89950738905696
2008009	11	0.38830746079508	8.16927216075214
2008009	12	0.478531163551353	10.1647361480408
2008009	13	0.489639514003402	10.2998472570987
2008009	14	0.468908003742859	10.0218919800043
2008009	15	0.448559967254288	9.47203365975226
2008009	16	0.429322560357829	8.80959726802729
2008009	17	0.396661091900244	8.05307914039503
2008009	18	0.366411561069754	7.23708862075607
2008009	19	0.351862894519075	6.91302530009054
2008009	20	0.336137868543363	6.11682670158535
2008009	21	0.303343849457213	5.46638030980046
2008009	22	0.294203578319192	4.85119052748188
2008009	23	0.256873513413269	3.75467072261592
2008010	0	0.239963988537512	3.72493918867903
2008010	1	0.285888021124892	3.83452255691802
2008010	2	0.386466984501208	4.87048948450339
2008010	3	0.536359764016717	6.64261258284201
2008010	4	0.636055231448934	9.36122755053192
2008010	5	0.643073033652316	11.6207545064657
2008010	6	0.688815320706531	14.1949736171813
2008010	7	0.751635487368525	15.0986466920219
2008010	8	0.803543272899639	15.2189503485165
2008010	9	0.817247149756769	14.2497569712627
2008010	10	0.796306665893968	13.387139459529
2008010	11	0.802076097270096	12.2678297431872
2008010	12	0.803235259382404	11.0065208557725
2008010	13	0.696375768083864	9.11566254632507
2008010	14	0.527028115549845	6.86764999843539
2008010	15	0.438114927200399	6.08893017425641
2008010	16	0.418348263043393	5.92282839093454
2008010	17	0.39577393005316	6.42902346955487
2008010	18	0.357514251402818	7.15262135621495
2008010	19	0.359035665835984	8.35262743707045
2008010	20	0.329157104452611	7.64704176896698
2008010	21	0.410184522155964	9.00882247420384
2008010	22	0.625026351645868	12.2006958474135
2008010	23	0.658265475676841	12.6150362044458
2008011	0	0.757689545216496	14.8437358702982
2008011	1	0.894279893019629	16.1503599787959
2008011	2	0.970123099164369	16.4595348512248
2008011	3	0.96038661911724	16.7326867705211
2008011	4	0.942632146471891	14.9173777272815
2008011	5	0.872006294502276	12.3281611314708
2008011	6	0.699130883240662	9.9503567270361
2008011	7	0.283029066995836	4.53676161224464
2008011	8	0.133968813158245	3.25700856029204
2008011	9	0.0945361986461141	1.75839715026442
2008011	10	0.205448477210305	2.59035887431888
2008011	11	0.269364592829255	2.42471074034851
2008011	12	0.272600410772667	1.95582906727042
2008011	13	0.30728233358181	2.06799144738651
2008011	14	0.347727488261277	2.34418316439309
2008011	15	0.344081762786193	2.54239407778123
2008011	16	0.136147502068836	1.14717989848936
2008011	17	0.0850905163080289	0.987655411902548
2008011	18	0.278165599149183	3.17806277523525
2008011	19	0.398468030182351	5.80784679728059
2008011	20	0.413145507527884	6.34668956533385
2008011	21	0.42274543544377	7.47647533577437
2008011	22	0.461737530388701	4.23279216683973
2008011	23	0.323153145063499	4.05387432524368
2008012	0	0.333463388866522	3.63040178452871
2008012	1	0.331788704460214	3.16785738121469
2008012	2	0.319738586632938	2.8600246714718
2008012	3	0.303473662707982	2.80834810213668
2008012	4	0.180769044636175	3.11451813411012
2008012	5	0.173422638224076	3.45814064001295
2008012	6	0.212126513887555	4.28980284764086
2008012	7	0.198984136495113	4.26463310507476
2008012	8	0.197693031481938	4.34666806700348
2008012	9	0.205704207701482	5.6419002475606
2008012	10	0.201516588672645	6.18026311169716
2008012	11	0.146911344260288	4.76037874570678
2008012	12	0.125556569779838	3.03193166699163
2008012	13	0.171552255777473	3.76172998076932
2008012	14	0.212745562012724	4.70640845556498
2008012	15	0.264888244559559	5.45309515519023
2008012	16	0.281576909229143	5.2819970609525
2008012	17	0.219798747063947	3.59384823566607
2008012	18	0.163315591931902	2.2436736427509
2008012	19	0.159452243723277	2.53301633196945
2008012	20	0.206222882561446	3.52042370645304
2008012	21	0.279498786390371	4.40143648097239
2008012	22	0.2948056788884	4.31365374427518
2008012	23	0.255988429575824	4.09309598653963
2008013	0	0.217366460352141	3.36054183579135
2008013	1	0.188560422564712	2.33498474042987
2008013	2	0.193505470230213	1.43459188918488
2008013	3	0.168870422661435	1.79864793298941
2008013	4	0.182125297807563	2.84060694803846
2008013	5	0.236291518272441	3.43373093803576
2008013	6	0.175015780281284	2.52450478205203
2008013	7	0.159450574486572	2.32304552253824
2008013	8	0.168236552885109	2.25472999941104
2008013	9	0.177129359770218	2.15260956685473
2008013	10	0.184007701234085	2.47329761300506
2008013	11	0.193737293121022	2.98056692923402
2008013	12	0.211288139109659	3.32100911324419
2008013	13	0.228444932529502	3.32096957148334
2008013	14	0.246879541809615	3.3733800063909
2008013	15	0.263777475918697	3.53463522207605
2008013	16	0.261150116861891	3.54763441758862
2008013	17	0.252315503036653	3.5382718706095
2008013	18	0.240119973640385	3.50307600845044
2008013	19	0.213023543835837	3.34008148042114
2008013	20	0.184670172710979	3.13445727884565
2008013	21	0.17143143064748	2.96557061154498
2008013	22	0.161469547674648	2.71108806682914
2008013	23	0.155444631243653	2.34122219624745
2008014	0	0.163099637723563	2.06125094511934
2008014	1	0.188474500931668	2.16692255177583
2008014	2	0.19582548050314	2.26669800974233
2008014	3	0.184602447592055	2.39836612869383
2008014	4	0.158204667676662	2.42791671701585
2008014	5	0.147251838671896	2.47009509593946
2008014	6	0.155024015828639	2.57062115951994
2008014	7	0.168538460717217	2.71359493640371
2008014	8	0.189330266344069	3.01249272943019
2008014	9	0.207713843927804	3.28814721681665
2008014	10	0.21279535959182	3.32057135769282
2008014	11	0.221164248417364	3.20825329728583
2008014	12	0.22641792935957	3.379097897509
2008014	13	0.226066465254161	3.79194312533643
2008014	14	0.245783600748037	4.44608745774771
2008014	15	0.233206532290812	4.06605006598526
2008014	16	0.251389284125166	4.27993537702589
2008014	17	0.293990343652944	5.06129588919268
2008014	18	0.302599352441703	5.51047981249654
2008014	19	0.293964195143744	5.48038784776433
2008014	20	0.283398309181939	5.5477483131329
2008014	21	0.269649031277331	5.30716528621839
2008014	22	0.281227724022694	5.63567526266849
2008014	23	0.371860464100413	7.14797658009821
2008015	0	0.458684831320339	8.8149915142506
2008015	1	0.466709415903804	9.04977569875596
2008015	2	0.3738949377978	7.50473508240798
2008015	3	0.214442927441657	5.36428805119975
2008015	4	0.144461679581511	4.68802792359553
2008015	5	0.201656462272059	5.21030827564908
2008015	6	0.27217625407227	5.78484881156603
2008015	7	0.307269376707684	5.99910295489213
2008015	8	0.434783316437735	7.12128775942691
2008015	9	0.509437396953883	6.49814951691242
2008015	10	0.332739194629831	4.22367216745963
2008015	11	0.372614559890647	4.86942018275387
2008015	12	0.360291137767235	4.03576493357401
2008015	13	0.236263051863316	3.64610263494989
2008015	14	0.149153468291299	4.34105440929983
2008015	15	0.199723424007506	6.01499672692045
2008015	16	0.227909101670672	7.31138106149434
2008015	17	0.199785637811645	6.30830856986981
2008015	18	0.188707964008637	6.36162343182217
2008015	19	0.200415470092172	6.5935941692351
2008015	20	0.196118229461242	6.16513727562919
2008015	21	0.186733138340199	5.67807912981741
2008015	22	0.154235769988938	4.46866847105242
2008015	23	0.123569228720944	3.77240532097108
2008016	0	0.112716451093606	3.69039170255257
2008016	1	0.135228390992072	4.40595623009532
2008016	2	0.233086993981956	6.61183537058114
2008016	3	0.26967920808181	6.56103009392529
2008016	4	0.265366323252792	5.6313445210768
2008016	5	0.290916841793356	6.15280544856809
2008016	6	0.337681183127748	8.65478815455074
2008016	7	0.334265165086835	7.94865892007806
2008016	8	0.386009227562239	7.99622196832826
2008016	9	0.416046160112807	8.34057621046483
2008016	10	0.416910261885787	8.36395916899006
2008016	11	0.42056173508003	8.00779922321041
2008016	12	0.390463993260349	7.0542849498799
2008016	13	0.357519642617596	6.74217645797506
2008016	14	0.348555731122973	6.84356494303728
2008016	15	0.325484049038398	6.24728177143073
2008016	16	0.339760849112035	6.5117550541146
2008016	17	0.357954746810551	6.8527957775653
2008016	18	0.345730500792505	6.7103375596294
2008016	19	0.412250650046022	7.37077543120272
2008016	20	0.59856189459699	9.95952824194655
2008016	21	0.772341253087395	12.5600348587612
2008016	22	0.783301212413459	12.9389149899285
2008016	23	0.712149380968349	11.7634602503558
2008017	0	0.580180963412174	9.6667560804014
2008017	1	0.536418696385402	8.62694194933512
2008017	2	0.515658611464143	8.24879174128587
2008017	3	0.514636727804331	7.96123985875977
2008017	4	0.497524143100335	7.38509163405694
2008017	5	0.46301294692025	6.56733375940165
2008017	6	0.43443141168876	5.85954565980716
2008017	7	0.436921919832564	5.6268463637817
2008017	8	0.440444631172763	5.40112995198769
2008017	9	0.435389165416662	5.16833755529744
2008017	10	0.44503557969356	4.86795475789643
2008017	11	0.473468639631069	4.61420600791032
2008017	12	0.46285362048824	4.17291525418268
2008017	13	0.310189095612684	1.96190844651977
2008017	14	0.136054535040748	1.1848679260701
2008017	15	0.107690370539065	1.48609131430251
2008017	16	0.122774520001322	1.84885865143343
2008017	17	0.138077935525227	2.01686710846797
2008017	18	0.138899441490395	2.16924543189514
2008017	19	0.162056368825966	2.28562073219292
2008017	20	0.145838596363385	2.03907143716667
2008017	21	0.0913677482864375	1.86378952115979
2008017	22	0.0782690783474982	1.98022453497487
2008017	23	0.0612128435716266	1.64467938009277
2008018	0	0.144254060630275	3.57232552315087
2008018	1	0.252915627875445	4.16937792097735
2008018	2	0.266539463158304	3.90592381172072
2008018	3	0.264044601664704	3.70561908869417
2008018	4	0.187484176643676	3.44174203485464
2008018	5	0.162602447857115	2.92817077369289
2008018	6	0.160733436373209	2.66493534214386
2008018	7	0.194789655271136	3.1097608891148
2008018	8	0.292210850933503	5.49996443249178
2008018	9	0.342448411192769	6.02245763148024
2008018	10	0.431332974105915	6.85449802623496
2008018	11	0.442367730905263	6.92681041382087
2008018	12	0.444679359776364	8.04046503337635
2008018	13	0.634073058889684	10.4636885812275
2008018	14	0.742139952178993	11.042778056507
2008018	15	0.806760061173716	10.8763169238881
2008018	16	0.754601157798471	9.03524195317879
2008018	17	0.648101535616341	6.78487610351164
2008018	18	0.494364629335593	4.97302810770962
2008018	19	0.306362373631709	4.46061475218904
2008018	20	0.291240907067984	6.72300050925007
2008018	21	0.265008733656493	7.47361600289655
2008018	22	0.257828395063651	7.68859251923815
2008018	23	0.199680162269615	6.39866208328053
2008019	0	0.366468050659381	10.0601095084559
2008019	1	0.558426752160817	14.194870396763
2008019	2	1.82406963659449	31.411146814715
2008019	3	2.35369976614013	28.7566303150905
2008019	4	1.31388304342754	19.5416717366858
2008019	5	1.27069634902504	21.9313609853033
2008019	6	0.66890017262537	15.6571415024559
2008019	7	0.726021076186915	16.9571015386578
2008019	8	0.616126901393636	14.0347727048886
2008019	9	0.463081248426204	10.5706657729192
2008019	10	0.401270967938405	8.8146611619905
2008019	11	0.387621000193768	8.19669039922716
2008019	12	0.403100403527649	8.42801968392083
2008019	13	0.435275475175456	8.78172150890312
2008019	14	0.440327852804025	8.4147447639986
2008019	15	0.444912464053882	8.15815931607719
2008019	16	0.583941968414047	9.98802651712829
2008019	17	0.693256539516935	11.6209706920546
2008019	18	0.668320026874541	11.0140884598171
2008019	19	0.493453282025808	8.08477048804968
2008019	20	0.35969509402666	6.64159020913674
2008019	21	0.364210985330893	6.55592264292717
2008019	22	0.400658925632597	6.82982599886954
2008019	23	0.412609885301125	6.64480706856924
2008020	0	0.408972835997906	6.42850567786064
2008020	1	0.401950587986244	6.19544472200632
2008020	2	0.394648949170528	5.27403981729366
2008020	3	0.392519377728693	4.24062676881863
2008020	4	0.392491370551869	3.67494361598716
2008020	5	0.396845236321228	3.44108655140211
2008020	6	0.404985192732588	3.27484108829976
2008020	7	0.391352771550417	3.32125150632554
2008020	8	0.34403155317515	3.16022440291033
2008020	9	0.311715707940999	2.96869437381851
2008020	10	0.304287833860258	2.79195777749574
2008020	11	0.305993164986133	2.57240371269984
2008020	12	0.302899735872887	2.33780776039393
2008020	13	0.273088700154544	1.94940009375395
2008020	14	0.196277992064599	1.77472782362964
2008020	15	0.153199532960907	1.4483028877265
2008020	16	0.136314509812341	1.07029572914039
2008020	17	0.139964837581082	1.02159986600804
2008020	18	0.161720680375991	1.08019296028892
2008020	19	0.167544278280195	1.17008889451803
2008020	20	0.160392067360598	1.12225762840732
2008020	21	0.135621673584431	0.918395873580775
2008020	22	0.150064828325787	1.93703330137708
2008020	23	0.181853492011628	2.40460648733507
2008021	0	0.229356280908865	2.89434533009312
2008021	1	0.248638197545783	3.39764376257924
2008021	2	0.263837827906882	3.97588047063211
2008021	3	0.290788805406564	4.54811501462793
2008021	4	0.317296786134807	4.88419230380867
2008021	5	0.319547309925567	5.04937745172966
2008021	6	0.324682478313216	5.26845015941749
2008021	7	0.322879584925238	5.17219675197837
2008021	8	0.334894368253257	5.2581256642434
2008021	9	0.356811070744783	5.31414251434645
2008021	10	0.371637504125169	4.99991844463294
2008021	11	0.382382772687892	4.74613259043783
2008021	12	0.391764825499831	4.54335966997239
2008021	13	0.400755629317783	4.29188623453728
2008021	14	0.398538360056742	3.74377002739022
2008021	15	0.374207656529501	3.64672276144158
2008021	16	0.359192199168343	3.49471930396333
2008021	17	0.303651277224863	2.74493837842945
2008021	18	0.26340482138542	2.48363062826043
2008021	19	0.3541096686586	3.11444120307772
2008021	20	0.47112278417715	3.72124566480193
2008021	21	0.592302962293062	4.20371897201786
2008021	22	0.689626682623347	5.24342309200892
2008021	23	0.709741300391004	5.63739296838299
2008022	0	0.662719712170249	5.82304784668001
2008022	1	0.661380950855389	6.20889525802127
2008022	2	0.648825950699871	5.99729962257933
2008022	3	0.501064818507805	4.68705121866918
2008022	4	0.175270348184127	1.91595938733071
2008022	5	0.109681754142234	1.31835952308148
2008022	6	0.263513099093554	1.92200542576951
2008022	7	0.496046950841035	2.6463130808391
2008022	8	0.569168586617208	2.68961987090321
2008022	9	0.549175154795274	2.0827309859454
2008022	10	0.424202338433639	1.6553780802662
2008022	11	0.31183008705082	1.46350694238992
2008022	12	0.287525468902679	1.39513993315115
2008022	13	0.292596982828269	1.35403569865812
2008022	14	0.308269181904038	1.27828575815268
2008022	15	0.327466248204383	1.23619841878312
2008022	16	0.304536222250585	1.32996751646864
2008022	17	0.267604501234833	1.43173617631556
2008022	18	0.256414773366443	1.90525625514277
2008022	19	0.259308135236234	2.28874156503685
2008022	20	0.297053165811863	2.34107060020088
2008022	21	0.325769596363189	2.23589825148174
2008022	22	0.331189849213246	2.13876343527374
2008022	23	0.321317463478664	2.0658700322135
2008023	0	0.312385768241191	1.95512339780631
2008023	1	0.305613813031683	1.84759000411743
2008023	2	0.307694997856618	2.16212708182524
2008023	3	0.326529277407884	2.58331321136206
2008023	4	0.327364221297897	2.59281377642534
2008023	5	0.295811902485309	2.55106043143469
2008023	6	0.317739918681492	2.85876258338344
2008023	7	0.404853715249507	3.4528705177553
2008023	8	0.426289722073302	3.67305488109105
2008023	9	0.368218622130657	3.41416867477375
2008023	10	0.312371295762614	3.86052693852373
2008023	11	0.251137632860318	3.91625921747384
2008023	12	0.209559250067006	3.19153614565969
2008023	13	0.216810856671869	3.27585930011037
2008023	14	0.240039320629787	3.00661041076177
2008023	15	0.257520200458529	2.45375134007166
2008023	16	0.274743898526346	2.2220395614116
2008023	17	0.33964238284872	2.6533168724635
2008023	18	0.592712321142917	4.23480615939417
2008023	19	0.799442564071743	5.21338582235053
2008023	20	0.897382781035059	6.27586550972003
2008023	21	1.00914731186052	9.01724656686314
2008023	22	1.09739464901853	10.22199565689
2008023	23	1.23492251762968	13.0178298443441
2008024	0	1.34173080975631	16.5917306280053
2008024	1	1.37826905021267	18.2337023891713
2008024	2	1.59371166427066	23.4151528661229
2008024	3	1.89526347624164	26.8902456164016
2008024	4	1.9892070126788	26.1495348004639
2008024	5	1.98895413493495	24.7071776414445
2008024	6	1.82457149949175	20.7403974216011
2008024	7	1.55557507024026	12.953615595501
2008024	8	1.31009112455312	11.594345365316
2008024	9	0.445313313676142	9.65985731440366
2008024	10	0.477055808677619	10.2550181459371
2008024	11	0.503824489083132	11.14655476204
2008024	12	0.528301693052976	10.1996612867521
2008024	13	0.455537490504479	8.71229684440052
2008024	14	0.442332370822372	9.66419851421526
2008024	15	0.48174475502275	11.069623392766
2008024	16	0.496971463053534	11.3315907111394
2008024	17	0.48613929575726	10.4743208258989
2008024	18	0.445252377289808	9.87003427912118
2008024	19	0.416763267146818	10.2312626145532
2008024	20	0.463978206504381	10.5734204230664
2008024	21	0.473035881130119	10.602298242317
2008024	22	0.446526334773691	10.4187492858075
2008024	23	0.503103529906912	10.9214460092327
2008025	0	0.561382005795566	11.0179746677586
2008025	1	0.506957594834275	10.0210370763317
2008025	2	0.450869507873691	9.43102415082713
2008025	3	0.411154912366711	8.61645143146202
2008025	4	0.449853289510674	8.32763802295514
2008025	5	0.619283785873136	10.2340850873343
2008025	6	0.725968754812784	13.0206696780992
2008025	7	0.835458849937682	16.033729792721
2008025	8	0.915392585424335	19.1127659830919
2008025	9	1.05574117073532	22.499544583452
2008025	10	1.12454869095985	24.6419176104114
2008025	11	1.08861851984226	23.294048285848
2008025	12	0.81090759215132	17.0246520396613
2008025	13	1.04974637468326	21.4360699199448
2008025	14	1.14210129243367	22.5251357566814
2008025	15	1.09953137383328	21.117380479109
2008025	16	1.12295419055231	23.1208464411529
2008025	17	1.09164885639151	20.8582290541089
2008025	18	1.09286340215562	20.2334530069892
2008025	19	1.09412347147127	20.1694347452201
2008025	20	1.06212258647189	18.9194694755527
2008025	21	1.025305135696	17.8519542494499
2008025	22	1.01880969559346	17.0626537642448
2008025	23	1.02536322045782	17.6856667587116
2008026	0	0.999166263307301	16.562949667771
2008026	1	0.93475775148998	15.7475413985236
2008026	2	0.906815865023567	15.4627416051263
2008026	3	0.904467760868023	15.9809385267858
2008026	4	0.85552160225802	15.9898413339482
2008026	5	0.880469357502603	17.6648315319562
2008026	6	0.954009124985442	19.0179126456614
2008026	7	0.92326632961026	18.8300972012398
2008026	8	0.824166118035289	18.5102274351836
2008026	9	0.665101280955774	18.4540940621152
2008026	10	0.487929095239265	12.3580483734959
2008026	11	0.372776716044786	7.48730325925196
2008026	12	0.452111382989385	8.39971835149559
2008026	13	0.477536517867204	9.66143792053337
2008026	14	0.477422866891994	9.35866192483545
2008026	15	0.444628617205534	8.35244266942637
2008026	16	0.311771203610465	7.36431525356876
2008026	17	0.518490444148562	11.6221647372651
2008026	18	0.704122870807255	16.7751078500674
2008026	19	0.788772476988962	17.9284424676622
2008026	20	0.799043519637242	17.9816534150269
2008026	21	0.784365063009429	17.220530487648
2008026	22	0.748459932248443	14.3950358488432
2008026	23	0.707560908777816	12.1726964635283
2008027	0	0.640555425009017	10.2824246239148
2008027	1	0.526294889683453	8.29293465740892
2008027	2	0.425419387048399	6.63560253490715
2008027	3	0.334971474978775	5.15296722200645
2008027	4	0.16876963303509	2.38279877838816
2008027	5	0.100496430420529	1.25465328645668
2008027	6	0.0672715149502142	0.785735987568693
2008027	7	0.0480105343805865	0.559226150580418
2008027	8	0.0586773989738746	0.801535017176986
2008027	9	0.0654679986557132	0.923184823030833
2008027	10	0.0659850631076522	0.922205715753099
2008027	11	0.068578552879314	0.945298466092438
2008027	12	0.0875322096291916	1.02441754755616
2008027	13	0.172144985959956	1.62605062262347
2008027	14	0.411270391899765	2.68370276231472
2008027	15	0.921152004773921	5.4872487790409
2008027	16	1.31864921950993	7.06836856941467
2008027	17	1.58375601388457	6.3354222342761
2008027	18	1.67038798593859	6.4968191212448
2008027	19	1.65957160017424	6.4815915519126
2008027	20	1.64851876987334	6.68002966787645
2008027	21	1.62802771683292	6.73937933834018
2008027	22	1.62259876272557	7.01475663703672
2008027	23	1.51124524557292	7.43929740082464
2008028	0	1.41413680269836	7.3123632782868
2008028	1	1.35963317337565	7.02526914967564
2008028	2	1.25722134113275	6.36757718461066
2008028	3	1.15740956376042	5.29516321054501
2008028	4	1.05377173094464	4.67326832811309
2008028	5	0.954555068406779	4.4119244779483
2008028	6	0.883964100705902	4.26674826834368
2008028	7	0.89845163386063	3.90352389631251
2008028	8	0.760459991013573	3.73639815764806
2008028	9	0.670679680139665	3.50927905724395
2008028	10	0.637976093812301	2.81405894797996
2008028	11	0.556721715065398	2.16851079577018
2008028	12	0.403033270082289	1.51084251386143
2008028	13	0.362547827698987	1.38884283762736
2008028	14	0.364870734909768	1.41816534472865
2008028	15	0.367501470899068	1.55374796634663
2008028	16	0.337327906861349	1.86623099349433
2008028	17	0.287247958037972	2.16857806848722
2008028	18	0.27104403613885	2.27696434753781
2008028	19	0.267034779000972	2.30710369824745
2008028	20	0.270129721187432	2.18282540880205
2008028	21	0.256800378996763	2.05270356196287
2008028	22	0.244238120876963	1.89201987147928
2008028	23	0.249328717660143	1.68619721504285
2008029	0	0.261708106891606	1.57283508325697
2008029	1	0.282394852833348	2.47515271008184
2008029	2	0.296732744037038	3.03384329669429
2008029	3	0.309394752432785	3.37557919512716
2008029	4	0.308592825668066	3.13353353610492
2008029	5	0.298699434037527	2.61884685149495
2008029	6	0.272109315916171	2.13980436504286
2008029	7	0.247933879937994	2.03119489465912
2008029	8	0.239191625976411	1.97988634538993
2008029	9	0.233936119406245	1.97144262884036
2008029	10	0.2341976890309	2.04304660597129
2008029	11	0.241884812787813	2.60738745615495
2008029	12	0.26034566230917	3.31256505429113
2008029	13	0.287393248570095	4.04109083888869
2008029	14	0.313717044517744	4.66393579124999
2008029	15	0.35230913299485	5.30903514778099
2008029	16	0.358677519272043	5.86825238305244
2008029	17	0.358322968512249	6.00916524513364
2008029	18	0.345723743659751	6.23566243271231
2008029	19	0.343270021191025	6.45593227840617
2008029	20	0.361462060766914	6.51503484617738
2008029	21	0.380639182080665	6.55099242166138
2008029	22	0.400467662254703	6.76211339706173
2008029	23	0.432970128387051	7.02811135478617
2008030	0	0.383998751330832	6.50894024641876
2008030	1	0.279397250107088	4.88677777878184
2008030	2	0.110330344027235	1.85493832709885
2008030	3	0.0679917386544249	0.788942224236673
2008030	4	0.177208294271104	1.83658195744469
2008030	5	0.211434397433419	2.04883149326884
2008030	6	0.206156382904259	2.11471827684638
2008030	7	0.346251190670395	4.556552156542
2008030	8	0.364475172919185	5.01534191909834
2008030	9	0.306391102982694	4.0568151208536
2008030	10	0.295019782460428	3.36093926371683
2008030	11	0.318755049469186	4.02248408128186
2008030	12	0.35442449815071	4.89908671276671
2008030	13	0.238117408973864	2.69443901730638
2008030	14	0.152714965615025	2.28258033862698
2008030	15	0.0905857501139444	2.22133866936853
2008030	16	0.156026328618226	3.32465850605559
2008030	17	0.392449416502761	6.6572451194011
2008030	18	0.415166295572666	7.02481946354883
2008030	19	0.426422790912217	6.86968684129399
2008030	20	0.396596253317104	6.40948822321196
2008030	21	0.325029241263054	5.3142617433623
2008030	22	0.24446002575404	3.15105598368834
2008030	23	0.225905433302445	2.58617258214527
2008031	0	0.237121217662679	2.85258708393602
2008031	1	0.294369616754581	3.68568284457971
2008031	2	0.307196495212876	4.12318729468221
2008031	3	0.302952092405125	4.31333897044356
2008031	4	0.309906332792195	4.821636016763
2008031	5	0.331329748486972	5.61840258962323
2008031	6	0.362019433659682	6.30430935053593
2008031	7	0.395046620816759	6.62970371827885
2008031	8	0.38926312182003	6.46571077835449
2008031	9	0.365057444485337	6.16249256656574
2008031	10	0.295853205510585	6.43941548038072
2008031	11	0.274360578716147	6.80560001003832
2008031	12	0.313732130018432	7.91497672827334
2008031	13	0.450850643429664	12.8783933791648
2008031	14	0.529850444835641	15.6036128226743
2008031	15	0.57449081143282	17.8603113260973
2008031	16	0.542172771688701	18.3991278519037
2008031	17	0.385505601840082	15.5316786680974
2008031	18	0.29379798335055	9.42882529410775
2008031	19	0.415627179881854	10.0075382389752
2008031	20	0.495924159385506	12.168636206264
2008031	21	0.530173637755654	14.6363538994485
2008031	22	0.640980427882506	16.0545716438255
2008031	23	0.737620766345751	17.4260126158616
2008032	0	0.801421903043781	21.0615982628154
2008032	1	0.895065660673669	24.9623468515958
2008032	2	0.865340435291358	24.7900246396992
2008032	3	0.795960142035099	23.7583066590514
2008032	4	0.871191329508926	25.1974511525786
2008032	5	0.93238359856943	27.7518403090105
2008032	6	0.544599545871814	18.4709722659958
2008032	7	0.402813285353349	15.1879632693279
2008032	8	0.492128384557929	18.0666166109992
2008032	9	1.00078102750218	31.9507204920453
2008032	10	1.18844077813344	36.5707162331832
2008032	11	1.22023726231579	35.5119769861654
2008032	12	1.23082193913062	34.5612166545891
2008032	13	1.22148480414008	33.2028465763975
2008032	14	1.29122879805389	32.5713999980479
2008032	15	1.26171953060076	29.8818076614266
2008032	16	0.999822848635059	23.6395607673741
2008032	17	0.772060282798632	16.3073202924745
2008032	18	0.977196693021	16.3502357409821
2008032	19	0.835769209541464	14.3857302303116
2008032	20	0.342126580979637	5.46406665406018
2008032	21	0.642631299227537	14.370846607454
2008032	22	0.31587293568755	7.63536535686901
2008032	23	0.848952637896393	21.5153949004198
2008033	0	1.38531753674161	32.1763267061823
2008033	1	1.00095587471562	25.0853962091684
2008033	2	0.912111681834218	21.5844667472767
2008033	3	0.866226771325198	19.5434241080823
2008033	4	0.47124816208925	10.5767620178747
2008033	5	0.211717348516956	5.60936549654855
2008033	6	0.471265714961851	12.2930142928587
2008033	7	0.834507074954445	19.4158249002545
2008033	8	0.695228878941391	14.825416788159
2008033	9	0.600448071632208	13.6015882845204
2008033	10	0.511970581377268	12.8325017956762
2008033	11	0.628580774200402	14.901536963595
2008033	12	0.552009945429947	13.0947350219706
2008033	13	0.466388434688593	10.7917131725076
2008033	14	0.362336965533722	8.28387965576382
2008033	15	0.3621329999655	8.1181097920501
2008033	16	0.469804708947927	8.9061945623342
2008033	17	0.436657990459418	7.36203587561775
2008033	18	0.331360857666785	5.3806405420201
2008033	19	0.347348734419615	5.44970863473204
2008033	20	0.439083078880971	7.17578964663543
2008033	21	0.389196753067467	6.79077537172796
2008033	22	0.312917275702802	5.35237024623257
2008033	23	0.309422449415719	4.85681129761732
2008034	0	0.337649560241873	4.29450958068945
2008034	1	0.367774557177624	4.51724238297145
2008034	2	0.348669198898459	4.76537150644079
2008034	3	0.312504840235841	4.44923024073168
2008034	4	0.32561369005674	4.50549492823473
2008034	5	0.379726394756332	5.05072358424607
2008034	6	0.489071407744836	5.42657306578086
2008034	7	0.588104903178992	5.39048800865192
2008034	8	0.619893265318743	5.1198979802712
2008034	9	0.546377751916404	5.05931568912898
2008034	10	0.503345037892525	5.09264425794161
2008034	11	0.477591764629524	4.45649828199304
2008034	12	0.420853993585898	3.8055484036677
2008034	13	0.413288772018825	3.64154818057815
2008034	14	0.423643163474249	3.93495248473105
2008034	15	0.35378850913384	3.60585645456965
2008034	16	0.28710861338545	2.89141150173956
2008034	17	0.237359035159075	1.81935582609205
2008034	18	0.221932999346137	1.45704587364681
2008034	19	0.258913986311391	2.04449613547635
2008034	20	0.290175820378968	2.50769614254916
2008034	21	0.299939588186888	2.20170005244873
2008034	22	0.310726793086062	2.55066103389241
2008034	23	0.343343308274852	2.96393193409559
2008035	0	0.387615575441223	3.29698699623659
2008035	1	0.405029710879833	3.37828265995156
2008035	2	0.410208463607193	3.23242551344585
2008035	3	0.380920649183345	3.11068360083746
2008035	4	0.32241062204964	2.98593020743399
2008035	5	0.280896451466078	2.85839386188864
2008035	6	0.260748458216893	2.87565240551178
2008035	7	0.241759390878311	2.83230656344694
2008035	8	0.230069499204144	2.79742962490157
2008035	9	0.223869358325956	2.68293505983418
2008035	10	0.2169554485158	2.43287980889525
2008035	11	0.199071527245243	2.06094945396523
2008035	12	0.179685533183086	1.76972233110046
2008035	13	0.188836375134834	1.78623186332093
2008035	14	0.202928399518593	1.87881200008114
2008035	15	0.184698255606588	1.90176817716456
2008035	16	0.165070517158762	2.11617410587205
2008035	17	0.149779265489171	2.51263468051522
2008035	18	0.131915197063432	2.61510547063383
2008035	19	0.198965963668056	2.51336202992085
2008035	20	0.231910415564591	3.24745228491686
2008035	21	0.262157447277517	3.90415984935941
2008035	22	0.272437005780131	3.84914032142602
2008035	23	0.251000663102953	2.92309501407545
2008036	0	0.217652846618039	2.90189688501958
2008036	1	0.181565615221988	2.9190850102469
2008036	2	0.138195576676128	2.94544214708107
2008036	3	0.183429255871782	3.70119513339909
2008036	4	0.288686922231886	4.58807916179514
2008036	5	0.260050896593885	4.45764228267375
2008036	6	0.220808507730467	4.04378800528232
2008036	7	0.204820805226695	3.69317441002096
2008036	8	0.21049076825621	3.65878593588433
2008036	9	0.219096484988178	4.01171668152441
2008036	10	0.295008090102183	5.03298552110502
2008036	11	0.231491407487432	4.12005692450061
2008036	12	0.11445946161153	2.68877372644557
2008036	13	0.103839038753898	2.91245261454474
2008036	14	0.189391054803529	6.18789097172726
2008036	15	0.249361914760019	7.65055683027482
2008036	16	0.216984044899076	6.91016787165461
2008036	17	0.259488314115577	7.67314398648692
2008036	18	0.299756458246525	7.57641916407107
2008036	19	0.345553087098004	7.39036372816745
2008036	20	0.325198270144754	7.16942934073818
2008036	21	0.30957299847942	7.35390861172375
2008036	22	0.33684229379075	6.36489446051067
2008036	23	0.30950657260447	5.94526694154579
2008037	0	0.284949611248178	6.02987570781815
2008037	1	0.29278131719275	6.23791387438775
2008037	2	0.263066658977044	5.76060415263877
2008037	3	0.316970234777093	5.20369417189117
2008037	4	0.338960507334112	4.46210508148854
2008037	5	0.319786920774544	5.59891610007117
2008037	6	0.313192218198668	5.60175184800701
2008037	7	0.467071295075423	10.3249949281172
2008037	8	0.533507355705311	13.2694307312023
2008037	9	0.553513746520236	13.0794200952677
2008037	10	0.685802315017592	14.7583516664639
2008037	11	0.696947379327168	15.0424390708636
2008037	12	0.705693869395953	15.3903489255289
2008037	13	0.74758857017131	15.5303006661697
2008037	14	0.754778519103729	15.9737145303863
2008037	15	0.811978862258265	16.8368045589508
2008037	16	0.911007632799424	17.581729301985
2008037	17	0.838560833579159	16.465246355103
2008037	18	0.651417778612988	13.4510611642739
2008037	19	0.584208792139481	11.8628627296134
2008037	20	0.53401849632513	11.8117457643278
2008037	21	0.405974608908555	10.942311795551
2008037	22	0.33910570641027	9.64359441301733
2008037	23	0.321893613925065	8.76677498047629
2008038	0	0.319150056694064	8.48715328556111
2008038	1	0.350402266120755	8.95648311556428
2008038	2	0.397793814550267	9.4837142014709
2008038	3	0.427969960943075	9.32635775598427
2008038	4	0.393290615296055	8.408328516639
2008038	5	0.356555949983465	7.74281962802317
2008038	6	0.333620338676919	7.43655290040779
2008038	7	0.299617732194212	7.2626353063989
2008038	8	0.300590613729562	7.10466860390257
2008038	9	0.352065810681558	7.07708440128361
2008038	10	0.402690944745162	5.68291316822977
2008038	11	0.406016819934963	3.50331434474284
2008038	12	0.386530406117918	2.87191059142922
2008038	13	0.348053200760154	2.53379978489736
2008038	14	0.297290386363475	2.21177020634239
2008038	15	0.289457814807534	2.09333748532817
2008038	16	0.314174152094996	2.16746080139958
2008038	17	0.361504981039176	2.69168977280578
2008038	18	0.393053982575079	3.11714877032513
2008038	19	0.412329153228333	2.47289907594469
2008038	20	0.406160479359737	2.25192227069853
2008038	21	0.409529306996742	2.65138805035181
2008038	22	0.427479523372661	3.39442081232892
2008038	23	0.45537579075558	4.27139371112747
2008039	0	0.506881802939676	5.30327650356949
2008039	1	0.574026443208637	6.35430062034149
2008039	2	0.557775802925953	6.38672273586313
2008039	3	0.521101497740678	5.72473120097306
2008039	4	0.486104988357648	4.90487693349761
2008039	5	0.443738652942835	3.67862002678995
2008039	6	0.394369570686238	2.84155667064782
2008039	7	0.373636637133895	2.40116754792371
2008039	8	0.389176533325086	2.31897569440534
2008039	9	0.409712875585934	2.45804958312628
2008039	10	0.448048119158617	2.75740038345007
2008039	11	0.475571646825383	2.86468737587704
2008039	12	0.475214414158059	2.94445451786451
2008039	13	0.44757893174803	2.94812548691553
2008039	14	0.405845586191039	2.7826713554339
2008039	15	0.383577026321203	2.61740658933729
2008039	16	0.362328909061013	2.29168105457159
2008039	17	0.296634811858393	1.7339966837919
2008039	18	0.262602824678143	1.47400770231113
2008039	19	0.248886619797508	1.28214817204971
2008039	20	0.227419502769328	0.991012532786229
2008039	21	0.209146274592654	0.82575945922819
2008039	22	0.197496792703102	0.807507186218896
2008039	23	0.193163426911977	0.912400735275972
2008040	0	0.191926459372647	1.09048011449783
2008040	1	0.191458292900606	1.24938011137841
2008040	2	0.174823395366507	1.34441903095688
2008040	3	0.150001958531643	1.31113447199128
2008040	4	0.129712996382664	1.17925483942699
2008040	5	0.11582377225937	1.1002632036062
2008040	6	0.112540330366636	1.13395048260055
2008040	7	0.120355524196064	1.20984410501781
2008040	8	0.13608007335658	1.24213897599437
2008040	9	0.145977711498033	1.22257357054387
2008040	10	0.151929584881755	1.20377837255319
2008040	11	0.154547786798328	1.16357265947888
2008040	12	0.153601672879453	1.12256863528314
2008040	13	0.15246215641682	1.10290642614441
2008040	14	0.147893104243866	1.07305574642006
2008040	15	0.141706397346435	1.02559992264179
2008040	16	0.139396530013985	0.953576761289071
2008040	17	0.141632551082554	0.886234132787323
2008040	18	0.152429073128359	0.821285644936928
2008040	19	0.166495093359782	0.744135576232695
2008040	20	0.178930184560857	0.703787144651542
2008040	21	0.185790788439805	0.666574732135607
2008040	22	0.191822344018233	0.645929904335913
2008040	23	0.20024300518106	0.649436305310034
2008041	0	0.20937459382143	0.668919421893646
2008041	1	0.217356521718177	0.69924039356246
2008041	2	0.221246898775993	0.727539632279651
2008041	3	0.221082219470912	0.753245587439387
2008041	4	0.218150290802635	0.765662125497967
2008041	5	0.214593813910548	0.761979465051428
2008041	6	0.206433032213062	0.750122076781453
2008041	7	0.199594027556604	0.741041488028536
2008041	8	0.19516056324583	0.732003740342061
2008041	9	0.194130184815062	0.721528459101105
2008041	10	0.198975221384876	0.70155894291403
2008041	11	0.203314444704533	0.692525267356533
2008041	12	0.208880168442555	0.714645093645344
2008041	13	0.210002494856553	0.745793170827467
2008041	14	0.214492790318287	0.776547160193404
2008041	15	0.220987072067921	0.806168147027443
2008041	16	0.22290812000641	0.824819777372485
2008041	17	0.219882939075366	0.823204631226354
2008041	18	0.216167329995396	0.811388064000776
2008041	19	0.212423025387493	0.79579684202578
2008041	20	0.207107999234936	0.779387103500906
2008041	21	0.203114633758399	0.766066716437082
2008041	22	0.198273087470986	0.760730895628856
2008041	23	0.196271708451137	0.757368346301141
2008042	0	0.191470236644872	0.758581128205367
2008042	1	0.188781712706605	0.768372689236102
2008042	2	0.184180314627703	0.774241073363298
2008042	3	0.179583570138048	0.771912188092839
2008042	4	0.173018996458937	0.766733342095747
2008042	5	0.170388799950895	0.767327882740493
2008042	6	0.170345402390257	0.77874315031886
2008042	7	0.168641353943787	0.770947387845299
2008042	8	0.165044603906661	0.740953210259604
2008042	9	0.160677128336957	0.697886997930572
2008042	10	0.156560934634015	0.656453467239319
2008042	11	0.153673615883418	0.623747675666887
2008042	12	0.150492188919677	0.598982371550658
2008042	13	0.14091629917943	0.589202310249206
2008042	14	0.135713396282133	0.70473612070048
2008042	15	0.151975205380798	1.15691897097677
2008042	16	0.186037016331824	1.82463971028719
2008042	17	0.211813307134262	2.23704782727089
2008042	18	0.226812976844967	2.30245927700388
2008042	19	0.241953468646041	2.28662578491624
2008042	20	0.257827315801508	2.24585771255436
2008042	21	0.271287516582583	2.29138121602616
2008042	22	0.287373515041411	2.33423642388519
2008042	23	0.308464962084531	2.34861341558103
2008043	0	0.317525688629305	2.31382360836833
2008043	1	0.325206769889104	2.2585233080465
2008043	2	0.332759220215998	2.18816585403158
2008043	3	0.336823738322375	2.08459423317975
2008043	4	0.327400481267012	1.93402212035361
2008043	5	0.300022110009607	1.71272175125735
2008043	6	0.259677223349082	1.50842465220514
2008043	7	0.231970205346715	1.38349502687518
2008043	8	0.209673020878991	1.2838336277618
2008043	9	0.189124552495228	1.21439377284647
2008043	10	0.176434976322477	1.17797355284246
2008043	11	0.169518594160948	1.17713211114462
2008043	12	0.165928257394841	1.19266126393235
2008043	13	0.164790848935729	1.2347792034484
2008043	14	0.166907148930913	1.29755823860805
2008043	15	0.169730554684282	1.36243459583924
2008043	16	0.172993148538501	1.44110576523862
2008043	17	0.181280231763134	1.54232489249519
2008043	18	0.189907026425546	1.63485220900403
2008043	19	0.194042271136754	1.67205556667204
2008043	20	0.191254462368383	1.60055628173509
2008043	21	0.184141416031572	1.42972848243189
2008043	22	0.175306433339842	1.20145331763327
2008043	23	0.172514311484032	1.02562824436129
2008044	0	0.169482903760078	0.912854470395493
2008044	1	0.168055295727198	0.852495520104586
2008044	2	0.16904246407395	0.844042012536509
2008044	3	0.175165134775564	0.872707035609237
2008044	4	0.175912270257528	0.909568428346469
2008044	5	0.168191771985035	0.946675971992747
2008044	6	0.160058430918206	0.963843605643503
2008044	7	0.134632916289696	0.936811667624503
2008044	8	0.105155182480168	0.87756642774496
2008044	9	0.0935771631972026	0.847959533556217
2008044	10	0.0917851937088436	0.856528261347344
2008044	11	0.0936626865084229	0.892878940685461
2008044	12	0.0989523118178158	0.930063379449095
2008044	13	0.105662002111662	0.925715245292196
2008044	14	0.110670259993956	0.902247194599938
2008044	15	0.109952362443023	0.909410123109336
2008044	16	0.124835381443128	1.03524949638919
2008044	17	0.226372762462368	1.72190661627485
2008044	18	0.405057841175269	2.46814566373999
2008044	19	0.487805921071131	2.64450943787938
2008044	20	0.494392881217114	2.59676319378902
2008044	21	0.487842575318051	2.59236308889513
2008044	22	0.486377812988412	2.56428925518132
2008044	23	0.496767877999761	2.67731324607924
2008045	0	0.51565995511054	2.72101325031173
2008045	1	0.456610234943184	2.36135291377958
2008045	2	0.357771957100205	1.87148942174682
2008045	3	0.297129536055538	1.70273262633244
2008045	4	0.268012470636783	1.70587675962078
2008045	5	0.240940015720041	1.71276168318638
2008045	6	0.206800678730806	1.61799593823215
2008045	7	0.198360128681268	1.46489266851876
2008045	8	0.181561641884814	1.00124915988643
2008045	9	0.169129017804832	0.738987945587043
2008045	10	0.171373895747155	0.66502411499827
2008045	11	0.17308866782416	0.663704641622658
2008045	12	0.179329237244172	0.610274876318203
2008045	13	0.188118054873535	0.572656176162063
2008045	14	0.197990540012111	0.573399483613161
2008045	15	0.210223297115975	0.598472996819586
2008045	16	0.227970912261281	0.631782797285991
2008045	17	0.241731022487275	0.6720037319723
2008045	18	0.248609017644237	0.691295802255325
2008045	19	0.248976946320267	0.701702702849332
2008045	20	0.250795092732702	0.713561019295994
2008045	21	0.253745700528616	0.716763584495852
2008045	22	0.255272733045602	0.688666272495505
2008045	23	0.228701912408681	0.645860513832846
2008046	0	0.21939411507188	0.658016105340859
2008046	1	0.218692622500708	0.694219119386668
2008046	2	0.230891319967848	0.72261463898823
2008046	3	0.24661205458607	0.753395091967061
2008046	4	0.27407498811565	0.780920114275784
2008046	5	0.309037428479346	0.903153938122045
2008046	6	0.340635741186456	1.15682802058281
2008046	7	0.358502826672218	1.31525800708428
2008046	8	0.365054442962203	1.35294022389313
2008046	9	0.366091525219592	1.34370971505271
2008046	10	0.359977597142514	1.24118851051694
2008046	11	0.350474224583155	1.12690387715127
2008046	12	0.338571433624201	1.03652430724412
2008046	13	0.324241312728583	0.986860197163793
2008046	14	0.309608660382374	0.903565674823718
2008046	15	0.279357904415981	0.978267234698049
2008046	16	0.266526521537479	0.956184323354413
2008046	17	0.257362943059434	0.910359241415395
2008046	18	0.249607931931924	0.852814949514419
2008046	19	0.24129950626079	0.816182404175184
2008046	20	0.234041516531535	0.808987949876115
2008046	21	0.231271397247243	0.847264149718532
2008046	22	0.238017323709984	0.925296831898883
2008046	23	0.248835885657797	1.02909611408896
2008047	0	0.254313455206367	1.15289328375979
2008047	1	0.256162231661511	1.26100147049253
2008047	2	0.25701398531973	1.32049799142044
2008047	3	0.256294622506478	1.3903624225683
2008047	4	0.255199454151865	1.45256176482725
2008047	5	0.254172810363412	1.48042587367069
2008047	6	0.253939876205671	1.51736306978828
2008047	7	0.254700629741499	1.54455805580184
2008047	8	0.255336726439174	1.55390716797106
2008047	9	0.254447083205821	1.55399910895921
2008047	10	0.254054432665939	1.56858980641836
2008047	11	0.248570630782785	1.48842121251351
2008047	12	0.233289487048048	1.49807218075981
2008047	13	0.227293451841026	1.40441620629106
2008047	14	0.221759884121232	1.12186287839161
2008047	15	0.207966814108726	0.910307757871015
2008047	16	0.198925662596087	0.780049440015363
2008047	17	0.191884564222785	0.665903413953775
2008047	18	0.181257131936179	0.622033529045506
2008047	19	0.173211368896012	0.583316609005319
2008047	20	0.171274800766769	0.548767633460616
2008047	21	0.162650099989557	0.534313974622329
2008047	22	0.145915958903608	0.54501652600538
2008047	23	0.139490294392834	0.572845720829875
2008048	0	0.154897220119884	0.956841973335998
2008048	1	0.174323628680969	1.44214676074284
2008048	2	0.184376440905981	1.84040376704363
2008048	3	0.188152717654853	2.16123268961416
2008048	4	0.190624099467411	2.44994352819961
2008048	5	0.2045606928675	2.79357666270289
2008048	6	0.215765871387394	3.09266214495366
2008048	7	0.218504663089916	3.26163848568857
2008048	8	0.213372179138768	3.46673483503019
2008048	9	0.206411131070338	3.70169697059838
2008048	10	0.202907889224282	3.98643140115053
2008048	11	0.200118915979625	4.12890984707076
2008048	12	0.201049599800896	4.2265662977467
2008048	13	0.197153976240573	4.25407423843441
2008048	14	0.204520671220296	4.40060532684498
2008048	15	0.228891807340987	4.34131264355824
2008048	16	0.243463185744918	4.21561260177743
2008048	17	0.251630350795311	4.13944596194481
2008048	18	0.268521945809235	4.15776245796483
2008048	19	0.254575985581858	4.27457445618342
2008048	20	0.247189047568859	4.29008616845969
2008048	21	0.255777986245364	4.29017765079155
2008048	22	0.26817620340246	4.48271963475566
2008048	23	0.283652019979499	4.82161667561133
2008049	0	0.298085934987156	5.28136841984326
2008049	1	0.321591451297998	5.73856287442216
2008049	2	0.32590797054411	5.94287077564258
2008049	3	0.323975293546641	5.84341648850577
2008049	4	0.331486309579873	5.94826649158225
2008049	5	0.355677957170642	6.2410282729968
2008049	6	0.387107720400273	6.75758434935056
2008049	7	0.42129628496795	7.38298799705898
2008049	8	0.45064417340953	7.74416950757519
2008049	9	0.481395820376693	8.09189688651868
2008049	10	0.539971563488185	8.66978268362763
2008049	11	0.598375075816118	9.28318315561532
2008049	12	0.654053336439725	9.55255322697377
2008049	13	0.699594588802745	9.63243601393439
2008049	14	0.73189873048129	9.51404346803741
2008049	15	0.751944154211867	9.26144375177323
2008049	16	0.79271074961581	9.07279949285271
2008049	17	0.814574259228475	9.04216795999453
2008049	18	0.873953713884363	8.65975330048606
2008049	19	0.920558555636931	8.69072034790243
2008049	20	0.929075195220599	8.34685127501822
2008049	21	0.957324371962804	7.84567540804649
2008049	22	0.964739515534817	7.44377419409091
2008049	23	0.884682943169852	7.34657965417098
2008050	0	0.670339286087892	7.25455280469549
2008050	1	0.573878823287542	6.30908328801244
2008050	2	0.52633177098529	5.8556465498051
2008050	3	0.485416294289235	5.13523196514252
2008050	4	0.434044945496604	4.40438081375043
2008050	5	0.373719242619853	3.58770019880249
2008050	6	0.296522991681916	2.7158520708527
2008050	7	0.22756395315847	2.05355191445321
2008050	8	0.19966071529241	1.70464616883386
2008050	9	0.197851193286328	1.59580201723874
2008050	10	0.248990073035159	1.5486327184746
2008050	11	0.281576911677505	1.49866721409139
2008050	12	0.288537409186362	1.40195174849602
2008050	13	0.276376804888599	1.25235840632976
2008050	14	0.254526958058451	1.07963915070981
2008050	15	0.182692034926762	0.835919786656886
2008050	16	0.0903491306057503	0.605981983533863
2008050	17	0.0539837357845071	0.502557552926683
2008050	18	0.046907856723938	0.468172961171059
2008050	19	0.0458886391930922	0.443029616905838
2008050	20	0.0457643313099835	0.420559781692709
2008050	21	0.0473270515264091	0.450864674346374
2008050	22	0.0587557415440386	0.572211040730124
2008050	23	0.0733420188186839	0.694886899762204
2008051	0	0.0777530445881351	0.737267288125316
2008051	1	0.086385727124476	0.815665759440034
2008051	2	0.105055633143331	0.913926290776442
2008051	3	0.1091135239686	0.941796459785234
2008051	4	0.109900052194801	0.930318041042169
2008051	5	0.109699582344962	0.867383094220573
2008051	6	0.0922057363667709	0.748154339581931
2008051	7	0.0773257661445244	0.649814346105887
2008051	8	0.0708109168209864	0.59796836324383
2008051	9	0.0729673153516852	0.580658341135254
2008051	10	0.0772116167192759	0.571643528004047
2008051	11	0.085352195675789	0.568261956856927
2008051	12	0.0884496418522122	0.577512896840173
2008051	13	0.0907383807394929	0.611928781273288
2008051	14	0.0941155834931574	0.663781551422118
2008051	15	0.0931838829908743	0.692386175509218
2008051	16	0.0918828907283788	0.687693794241168
2008051	17	0.0950486842772184	0.718036104933971
2008051	18	0.0981427015032109	0.759899744129538
2008051	19	0.103871491258655	0.810642482415258
2008051	20	0.116077700419565	0.881824365704443
2008051	21	0.125710874764611	0.991354128094564
2008051	22	0.143828165480472	1.19968396592887
2008051	23	0.159717351677858	1.36357344725302
2008052	0	0.16257669966981	1.39204329789773
2008052	1	0.15912087992118	1.34783093340193
2008052	2	0.159024735795511	1.29111045154762
2008052	3	0.183317727234516	1.83064799366287
2008052	4	0.234949116565623	2.55762905610394
2008052	5	0.242524412621057	2.70146344077357
2008052	6	0.271265415542224	3.84853697103781
2008052	7	0.292917035895921	4.73750517185294
2008052	8	0.207980534016811	4.01985490124745
2008052	9	0.216007990359545	3.48685106171055
2008052	10	0.234469589922762	3.7654789654568
2008052	11	0.249861980498476	4.32840383260672
2008052	12	0.297918425958051	5.26342770902213
2008052	13	0.351422595024865	6.6986456842344
2008052	14	0.423391021039094	8.78257749632419
2008052	15	0.476216054595273	10.9529278175262
2008052	16	0.436184840124889	11.8479832127258
2008052	17	0.621912113128283	15.6567635205804
2008052	18	0.975483968761976	18.3970185276596
2008052	19	1.28355207683893	21.6748137663267
2008052	20	1.42810999165562	22.8453012661779
2008052	21	1.54286764483412	23.5913291535195
2008052	22	1.65769804149534	25.9498906445107
2008052	23	1.68171441654309	25.3482839930076
2008053	0	1.65184660921837	22.885082486803
2008053	1	1.70514165335812	22.9823351935092
2008053	2	1.72690264430001	22.5481103701628
2008053	3	1.5805467765291	21.2876272766724
2008053	4	1.54304546771194	22.3241432774958
2008053	5	1.17579817615449	16.9400599047086
2008053	6	1.01936052644956	14.7805743871131
2008053	7	0.778106761273495	12.600038535772
2008053	8	0.972215760311683	12.8191940180807
2008053	9	1.44013837299971	16.3885038732569
2008053	10	1.12758769754587	13.7343806743762
2008053	11	0.647616528949403	9.07438117636596
2008053	12	0.696468213476378	12.1650226770599
2008053	13	1.45573494064462	24.5601085116955
2008053	14	1.28229636580539	16.4458203084723
2008053	15	0.302149672279081	6.3044548878795
2008053	16	1.81893679451639	24.6539261540251
2008053	17	1.0908208449616	16.2854679433698
2008053	18	0.67024437509242	13.2640715153315
2008053	19	0.753966640379075	15.1288157209274
2008053	20	0.696749619547718	15.3033303988451
2008053	21	0.741080884854866	19.1251143911937
2008053	22	0.778587261078847	19.1276673830321
2008053	23	0.692427762115695	15.9956370865735
2008054	0	0.640087850801027	14.1366279448858
2008054	1	0.649302751131181	14.416092534966
2008054	2	0.69071572261646	15.1205719201916
2008054	3	0.688149445450992	15.4444032359508
2008054	4	0.720356010024463	15.3118965295175
2008054	5	0.776008400384257	15.0893219062856
2008054	6	0.799746365467612	14.1847114704614
2008054	7	0.801511727327138	13.0044150563776
2008054	8	0.779373084356072	11.9850160919832
2008054	9	0.758786170343042	11.2448315024189
2008054	10	0.737019330790292	10.3389525344297
2008054	11	0.651260844655675	9.12788668068979
2008054	12	0.535986668960427	6.68901482097233
2008054	13	0.399091551310283	4.4694665027997
2008054	14	0.433412991228309	4.88729648756463
2008054	15	0.543109530646093	5.12963576505568
2008054	16	0.432056644864484	4.84175573266162
2008054	17	0.324156986852528	5.06562180433559
2008054	18	0.272305213346532	5.07330704791657
2008054	19	0.417358629968528	9.16672985065202
2008054	20	0.664644798038998	12.4288724284528
2008054	21	1.00802463746325	14.5634529160053
2008054	22	1.21947751057713	18.1166444010432
2008054	23	1.36386676490259	18.8970518421907
2008055	0	1.41293753664103	16.9133042880092
2008055	1	1.47724849713143	17.1668522860495
2008055	2	1.50131987998324	16.6228085308709
2008055	3	1.35637241077579	15.5962418445626
2008055	4	1.1954067697785	14.1114500863623
2008055	5	1.12099390752998	12.9758728893892
2008055	6	1.10090771662874	13.7341187285998
2008055	7	0.966583885711457	12.727268565225
2008055	8	0.85210116042333	10.819871337425
2008055	9	0.767983894351932	9.44902384579502
2008055	10	0.743877936987204	9.02662112480401
2008055	11	0.769373958709959	9.00275908736194
2008055	12	0.784556332854451	9.03973791510785
2008055	13	0.706630390209239	8.33600091126262
2008055	14	0.659757803836432	7.88167264791653
2008055	15	0.690790907396417	7.67390154335598
2008055	16	0.70058484892933	7.29457091199904
2008055	17	0.687668857315829	7.24699366664056
2008055	18	0.657197383558968	7.21929967694788
2008055	19	0.591679628661739	7.83276529570193
2008055	20	0.534399028561493	6.48623130709977
2008055	21	0.488525195338638	2.77676913013376
2008055	22	0.105527614091605	1.44024379262366
2008055	23	0.265221890780364	2.03932126719026
2008056	0	0.277624432112677	1.84045439258897
2008056	1	0.328452418156651	2.38297114117557
2008056	2	0.348733050847817	4.2904325791331
2008056	3	0.278763539004603	4.24188161008842
2008056	4	0.223351781832556	4.17830466679091
2008056	5	0.193136091961159	3.84929295727935
2008056	6	0.190488696243675	3.55001418457869
2008056	7	0.208465799214065	3.391371144303
2008056	8	0.264724579068539	3.54923466753039
2008056	9	0.316817819552547	3.6096584130788
2008056	10	0.324004963373005	3.16379726561499
2008056	11	0.302024910373488	2.32993004756725
2008056	12	0.291651829762983	2.08908949788183
2008056	13	0.281297509648616	1.89619390790381
2008056	14	0.276938039941326	1.74966753514796
2008056	15	0.277029094930011	1.72070292621374
2008056	16	0.280216958316275	1.73037073797071
2008056	17	0.271316795581852	1.71326470970633
2008056	18	0.255477107668233	1.59830705996626
2008056	19	0.231273827096021	1.30312903520221
2008056	20	0.199336154711691	0.935816757760124
2008056	21	0.182096502557425	0.63893024119088
2008056	22	0.197499078683625	1.15261641582092
2008056	23	0.174376924307251	1.77293214744101
2008057	0	0.131545707558944	2.32549883936045
2008057	1	0.154961938481805	3.12879440038161
2008057	2	0.183810523877889	4.66382525087278
2008057	3	0.252786206833111	6.57706474301995
2008057	4	0.575159355748295	10.8163454124515
2008057	5	0.688115364708946	12.8082975002048
2008057	6	0.708815465682282	13.8914793579824
2008057	7	0.614374805271596	13.3451517924754
2008057	8	0.534515991677147	13.4811443912354
2008057	9	0.597926517041466	14.2757130720816
2008057	10	0.791480509542156	12.8757104251898
2008057	11	0.951349129934136	7.95595864325946
2008057	12	0.416351246703758	5.68388413770341
2008057	13	0.282653539364258	5.81147030684157
2008057	14	0.332498662025455	6.12835791106531
2008057	15	0.538366960316374	8.41253445231539
2008057	16	0.680800052015871	10.4490667321476
2008057	17	0.856325642905777	14.5999354301224
2008057	18	0.95187330937301	16.8685886303148
2008057	19	0.828330133631355	14.8705638743688
2008057	20	0.701078399540011	14.6165132501118
2008057	21	0.648238598364642	14.0902789964222
2008057	22	0.867128011112339	19.6201530479117
2008057	23	1.06782795924769	25.3206713335525
2008058	0	0.989126324139179	22.5203871237992
2008058	1	1.11982965322778	24.2256882711548
2008058	2	1.07660227962063	23.8912595588214
2008058	3	0.924773762345396	22.0856933359387
2008058	4	0.75962896969073	17.9609828597735
2008058	5	0.639917299791687	15.2926851158504
2008058	6	0.674803968180006	16.2092010845664
2008058	7	0.728068195259015	16.5513902748278
2008058	8	0.731962156379802	16.6061472890747
2008058	9	0.743396164446849	17.002536876944
2008058	10	0.731134998445215	16.2509414155928
2008058	11	0.639942352556404	13.9775099734911
2008058	12	0.551187002279373	11.3903570751656
2008058	13	0.410547148664747	7.67270920521674
2008058	14	0.158250715776096	4.12023825220284
2008058	15	0.10524663422304	3.48890044010895
2008058	16	0.117605773768556	3.29355593740738
2008058	17	0.171156600227284	4.29520819226317
2008058	18	0.519062008843397	12.7416760831834
2008058	19	0.753444175047842	16.9218732077042
2008058	20	0.789483218167903	16.7134027555776
2008058	21	0.78745552517729	16.1152173468134
2008058	22	0.722925324089877	14.7836041077395
2008058	23	0.662072623516322	13.2904189654782
2008059	0	0.646257163686619	12.5435176729858
2008059	1	0.643330295338092	12.1619249728047
2008059	2	0.610513230376794	11.8768849466789
2008059	3	0.574346905641804	11.2899101348228
2008059	4	0.547108897612158	10.7625046977353
2008059	5	0.486455826030757	9.13281172676285
2008059	6	0.445951502807429	6.96841300260649
2008059	7	0.440865889411366	5.92083317311107
2008059	8	0.438319490427277	5.12650344017601
2008059	9	0.452330156287939	4.57366776979646
2008059	10	0.489911122577085	4.34766613942495
2008059	11	0.500981059158279	4.2598290471146
2008059	12	0.485139422661931	4.02212357036187
2008059	13	0.456572126196437	3.76007886470047
2008059	14	0.433544291464528	3.45810704190862
2008059	15	0.425824590296558	3.05586668675153
2008059	16	0.419858948563805	2.86812523963944
2008059	17	0.353818103822782	3.47004897994035
2008059	18	0.281754100671596	3.53131683375745
2008059	19	0.261385359126191	3.30603838460224
2008059	20	0.245771694739231	2.8447010670473
2008059	21	0.252300051128003	3.82947233524844
2008059	22	0.288903089951134	4.58802260913614
2008059	23	0.307966799224436	4.82735610794207
2008060	0	0.288289724962285	4.65644781194233
2008060	1	0.287162988219795	5.03315340739794
2008060	2	0.290187552677002	5.21562566216065
2008060	3	0.267686031144522	4.86717474687551
2008060	4	0.282370306698404	5.03642084861963
2008060	5	0.250783853987611	4.47333640556653
2008060	6	0.242679670164928	4.01371128707318
2008060	7	0.214005144438117	3.4361380255642
2008060	8	0.179348212868945	2.77283250541422
2008060	9	0.207503725494669	3.05468630724507
2008060	10	0.229343013079498	3.28937906526431
2008060	11	0.278341918599264	3.89473394015734
2008060	12	0.260059487143766	3.95581659673525
2008060	13	0.25073105084729	4.28300922337127
2008060	14	0.241390843348572	4.07927056509791
2008060	15	0.227650816276776	3.76462056378039
2008060	16	0.2700906574941	4.19133658623525
2008060	17	0.29290979983471	4.42689612101638
2008060	18	0.324614537551074	4.66191490699053
2008060	19	0.379849754951045	5.73754979706408
2008060	20	0.232856025061876	5.02603163327421
2008060	21	0.183518149630605	6.5725948461251
2008060	22	0.158659772730867	7.63465958965362
2008060	23	0.186278370814336	7.85829368564657
