# Supplementary material for: A comparison of sea salt emission parameterizations in northwestern Europe using a chemistry transport model setup
Source: Copernicus journal article supplement (doi:10.5194/acp-16-9905-2016), 2016-08-08
Supplement: Supplementary file 2 [file acp-16-9905-2016-supplement.zip › conc/conc.timeseries.values.win2008.sp13.Na.DE0002R.csv]

doy	hour	pm2.5	pm10
2008001	0	0.169847510284779	0.670793383889195
2008001	1	0.171338082546068	0.794467906047892
2008001	2	0.158632542611748	0.779213474916137
2008001	3	0.155180610044758	0.750890188654231
2008001	4	0.149334512265862	0.724687160163828
2008001	5	0.150222019116596	0.711753531351431
2008001	6	0.161068565946835	0.757311758395839
2008001	7	0.182306699991102	0.800972134990141
2008001	8	0.211086303125618	0.82071841557413
2008001	9	0.243040904578468	0.812395159608422
2008001	10	0.292327165449911	0.836010385997889
2008001	11	0.322858115042385	1.04197057037328
2008001	12	0.342668248458922	1.21769180649717
2008001	13	0.334569903777614	1.15179613824352
2008001	14	0.318807441515686	1.11401717533961
2008001	15	0.288628948740489	1.08140881444258
2008001	16	0.2695070125231	1.06128322606279
2008001	17	0.25191167879977	0.990671183645738
2008001	18	0.239881478409738	0.940612836209546
2008001	19	0.232588476693843	0.886454121272456
2008001	20	0.233986478806585	0.804274694046608
2008001	21	0.226313166892246	0.690968802392978
2008001	22	0.215771786063275	0.587249129888676
2008001	23	0.206087438325622	0.516039475511298
2008002	0	0.203599392229631	0.468270921053143
2008002	1	0.194566178966759	0.429753160801846
2008002	2	0.196688005321812	0.404341336016361
2008002	3	0.198244960284879	0.384113316153216
2008002	4	0.194340814845175	0.360751232152551
2008002	5	0.182131535489111	0.33276434059157
2008002	6	0.169286876313306	0.315502653284254
2008002	7	0.173847152967485	0.327235870517337
2008002	8	0.169345563986763	0.294849338161212
2008002	9	0.156377064029955	0.263515071524227
2008002	10	0.15122121844421	0.240132320126863
2008002	11	0.13531219434042	0.216357651498982
2008002	12	0.114887159336631	0.22003483492094
2008002	13	0.106885782920301	0.244082000479178
2008002	14	0.109435380251434	0.24329265568164
2008002	15	0.124425274236832	0.232025033835107
2008002	16	0.134580632379607	0.229678661246644
2008002	17	0.125780607006257	0.208027493308926
2008002	18	0.0513344397530005	0.126531820597767
2008002	19	0.0344257093104907	0.0861595543983681
2008002	20	0.0178040722906806	0.0323789132302351
2008002	21	0.0112580286618896	0.0168668660293639
2008002	22	0.0095959541974712	0.0139388932572275
2008002	23	0.00737176836034717	0.0106337140731313
2008003	0	0.00488195394841323	0.00739826535602759
2008003	1	0.00408752990789967	0.0061860198330573
2008003	2	0.00409885408186413	0.00656790014570143
2008003	3	0.00438963860219626	0.0075233581093542
2008003	4	0.00446482534903587	0.00744748128829854
2008003	5	0.00375824777775912	0.00584124086204368
2008003	6	0.00310327949540678	0.00488449073143134
2008003	7	0.00313578326702694	0.00545483973194238
2008003	8	0.00339619432795901	0.00738693382650443
2008003	9	0.00725881358880276	0.0209721085810616
2008003	10	0.0108574472955454	0.0298255523265751
2008003	11	0.0108070710938013	0.0274543976018958
2008003	12	0.0147303457724272	0.0351751917782559
2008003	13	0.0185608885658948	0.0396188194923537
2008003	14	0.0155697743258547	0.0288246091878091
2008003	15	0.012920346554025	0.0221201088344873
2008003	16	0.0124452926994357	0.0203600816621529
2008003	17	0.0151310184611659	0.0231991524073757
2008003	18	0.020350796137712	0.0290307728137824
2008003	19	0.0247679582829268	0.0347974589313758
2008003	20	0.0311026743558713	0.0525547024474604
2008003	21	0.0365678713474278	0.0675507890664666
2008003	22	0.038197077986701	0.0707328873064103
2008003	23	0.0407226440073792	0.0717351775981773
2008004	0	0.0403167399094067	0.0683021647867712
2008004	1	0.0366877116863475	0.0625796334157537
2008004	2	0.0360120086444233	0.0563155536669507
2008004	3	0.0388389669103942	0.0578742163624949
2008004	4	0.0417987710330918	0.0623942349380637
2008004	5	0.0437293297001688	0.0664954081465684
2008004	6	0.0447238748842727	0.0682761990851079
2008004	7	0.0453449599675937	0.069682540933539
2008004	8	0.0448612498537857	0.0689905038976829
2008004	9	0.0447387821840003	0.0712639739360079
2008004	10	0.0465955062516226	0.0743270589527043
2008004	11	0.0479181896020779	0.0729846483648581
2008004	12	0.0481327581958643	0.0685836313690402
2008004	13	0.0477880183798069	0.0641686989971821
2008004	14	0.0470057067995204	0.0605016981554677
2008004	15	0.0459591283503269	0.0570660656057785
2008004	16	0.0440279707103964	0.0527118592801994
2008004	17	0.0409850434795909	0.0485692949137571
2008004	18	0.0372264939958856	0.0454052966341631
2008004	19	0.0344385628318049	0.0442955933375774
2008004	20	0.0343607353481484	0.0457070826862419
2008004	21	0.0339315070068731	0.0426184902509077
2008004	22	0.034002624575508	0.0424916017440929
2008004	23	0.038516314674662	0.0531959611267531
2008005	0	0.0468137804145072	0.0750136830936236
2008005	1	0.0553112371328296	0.102921995038351
2008005	2	0.0655782123393495	0.132354774018587
2008005	3	0.0759747608433574	0.148906387550742
2008005	4	0.0770042815615602	0.165827717374021
2008005	5	0.091959418519928	0.284436764173549
2008005	6	0.0990253375876723	0.363823965375014
2008005	7	0.103181972903672	0.396090972444495
2008005	8	0.108280565675422	0.399817507690016
2008005	9	0.106272105496851	0.320609912088052
2008005	10	0.0885228484837347	0.217553893502109
2008005	11	0.0833198042704378	0.211863406512828
2008005	12	0.0910953608614712	0.257877971682002
2008005	13	0.0880640176786911	0.159583395869738
2008005	14	0.0930732251088982	0.149320419986462
2008005	15	0.0790917613691147	0.112383853108939
2008005	16	0.0474359247637135	0.0737203999239394
2008005	17	0.0337861978930416	0.0633860519420505
2008005	18	0.032246259966921	0.0952584343386181
2008005	19	0.0395827453345045	0.169249487968952
2008005	20	0.0505595973672853	0.244203521351768
2008005	21	0.0566220861732721	0.26025994535678
2008005	22	0.0581282616330197	0.266355917741341
2008005	23	0.0649486267695376	0.271987508271443
2008006	0	0.0735067142846612	0.28732191652747
2008006	1	0.0840684653461639	0.314850919310365
2008006	2	0.0942497719531359	0.321428917939674
2008006	3	0.0995282094086806	0.295485370408902
2008006	4	0.101331295967737	0.267517299365054
2008006	5	0.101335676581896	0.245131498138051
2008006	6	0.100090500096963	0.226069980624465
2008006	7	0.0968378483012818	0.201111171117247
2008006	8	0.0933802167508104	0.181335551726349
2008006	9	0.0910203141261449	0.168683441235158
2008006	10	0.0865244303387521	0.159189430082182
2008006	11	0.0785542324364666	0.166243609464133
2008006	12	0.0890960229147222	0.34561314013188
2008006	13	0.118622153007131	0.694054097496128
2008006	14	0.132956691265416	0.574808723076657
2008006	15	0.135537405823756	0.429350806722939
2008006	16	0.135506822418101	0.389152828637659
2008006	17	0.134843623940066	0.366954002837984
2008006	18	0.136355639998285	0.353192523333025
2008006	19	0.140720843357248	0.355071906621477
2008006	20	0.143253164226512	0.367613081539986
2008006	21	0.145511745360749	0.392066021634388
2008006	22	0.14527408327121	0.380817979513214
2008006	23	0.139787718718651	0.349072445053165
2008007	0	0.149266901008672	0.520386899571953
2008007	1	0.163522337214145	0.614539610563109
2008007	2	0.168809292730158	0.642912784214977
2008007	3	0.160896039071642	0.518632163629563
2008007	4	0.142080605290842	0.378976596461631
2008007	5	0.12885565004633	0.267393742126948
2008007	6	0.125757438648845	0.229011136478659
2008007	7	0.122781798962447	0.251505113087587
2008007	8	0.10947003054819	0.270484232224736
2008007	9	0.0902052525736454	0.335959316807098
2008007	10	0.0773268103016257	0.255331116270778
2008007	11	0.0307396141188818	0.0727891163221449
2008007	12	0.0362230342642289	0.356813408862415
2008007	13	0.0499466628100889	0.305554603804673
2008007	14	0.109238114175144	0.636018272966437
2008007	15	0.108549177671876	0.376111257814093
2008007	16	0.164927134053233	1.20806200049481
2008007	17	0.0610950168237911	0.582208786761455
2008007	18	0.0283522933306499	0.434826952620919
2008007	19	0.0235052488965873	0.203745020547542
2008007	20	0.0367039508701545	0.206610157115683
2008007	21	0.0949577991949501	0.615257432066852
2008007	22	0.233659506185097	1.76897663809991
2008007	23	0.238472371693935	1.50735822687167
2008008	0	0.134710164360643	0.657978967814263
2008008	1	0.0684339539121539	0.229123514280981
2008008	2	0.113224587198993	0.716558875753766
2008008	3	0.149559434133123	1.20947171591982
2008008	4	0.152884278491261	1.89218645939604
2008008	5	0.193303095685179	2.17998379558824
2008008	6	0.276662652687203	2.55030480597088
2008008	7	0.340023969959624	2.6777181750206
2008008	8	0.339354993328811	1.71874229974125
2008008	9	0.293668970706295	0.703090151759561
2008008	10	0.290022908529612	0.573183294851652
2008008	11	0.294271336675369	0.831159244223735
2008008	12	0.307959743489893	1.4046599505714
2008008	13	0.31988751334562	1.54867697593045
2008008	14	0.279322613298028	1.03909246342883
2008008	15	0.218413227188242	0.591773028793791
2008008	16	0.213460142759528	0.499704704349999
2008008	17	0.201632372750028	0.323999557665142
2008008	18	0.193848984319074	0.302118729097612
2008008	19	0.198823061148195	0.295307575261732
2008008	20	0.212710429575558	0.313727449362513
2008008	21	0.22842879487659	0.388838253026364
2008008	22	0.214897147180626	0.442262136884273
2008008	23	0.195916833087105	0.525447815110799
2008009	0	0.181986114541213	0.746858879134933
2008009	1	0.180773456314208	0.95796732352317
2008009	2	0.192197748120238	0.880098765963663
2008009	3	0.216494676147101	0.71966299762273
2008009	4	0.220791297875225	0.62919043696723
2008009	5	0.188611081407949	0.597983044659996
2008009	6	0.17746657801911	0.455539754297667
2008009	7	0.176165509876011	0.368094800345906
2008009	8	0.181318910577821	0.30424096971793
2008009	9	0.177515172280877	0.249176143475263
2008009	10	0.169491036439673	0.233910484199316
2008009	11	0.154843965832865	0.258969896810508
2008009	12	0.123445936383287	0.21217550480933
2008009	13	0.0734148935312516	0.127408289837156
2008009	14	0.0426570851687848	0.081027757369931
2008009	15	0.0369586616054674	0.0997072052910439
2008009	16	0.0405955765387621	0.134008212034661
2008009	17	0.0499771789840025	0.135359981143072
2008009	18	0.077628184191653	0.282344257471356
2008009	19	0.0907059540347611	0.336800515606391
2008009	20	0.0957988304112412	0.34248266677258
2008009	21	0.103184495203867	0.337067915168958
2008009	22	0.104302366416029	0.321592697514452
2008009	23	0.102636342427637	0.343527401266149
2008010	0	0.10253699836281	0.398689473063888
2008010	1	0.0976348393221698	0.333776698801159
2008010	2	0.0890509382330506	0.248422157560133
2008010	3	0.0966432971779117	0.224228742863517
2008010	4	0.109997349762967	0.244845468587293
2008010	5	0.112301638216346	0.288566242615566
2008010	6	0.106309993991048	0.312934486353476
2008010	7	0.0993056853539671	0.368562083078859
2008010	8	0.112642383311362	0.704119127090531
2008010	9	0.118289382951293	0.836412665052708
2008010	10	0.0794330110893906	0.65784730009926
2008010	11	0.064547694783459	0.192916433225988
2008010	12	0.0555356324938113	0.155676431001078
2008010	13	0.0522255271755331	0.17714679179343
2008010	14	0.0458518456691215	0.125555940776305
2008010	15	0.0426026865315839	0.114059667232257
2008010	16	0.0403097265350901	0.110535565697869
2008010	17	0.0341503669912019	0.078183675649095
2008010	18	0.0233544137945928	0.039317889669141
2008010	19	0.0200104319280425	0.0349169028844079
2008010	20	0.023323746022432	0.0381261387585874
2008010	21	0.0283749834798228	0.0437263758792442
2008010	22	0.0335541969302576	0.0512074292699065
2008010	23	0.0392135100806306	0.0576393820372101
2008011	0	0.0408400186055811	0.0605828037805095
2008011	1	0.0379072974163934	0.0522870099325401
2008011	2	0.0285050468028918	0.0411483969291806
2008011	3	0.0243701601826045	0.0376252780545998
2008011	4	0.0215163266450751	0.0313701094301921
2008011	5	0.0163140334336338	0.0227942809742515
2008011	6	0.00884059486781671	0.011824975361983
2008011	7	0.00628530430310209	0.00873248480335569
2008011	8	0.00546653984534022	0.00876100409287708
2008011	9	0.00611945754770762	0.0113230957569652
2008011	10	0.0101534235768883	0.0234613469057407
2008011	11	0.0103887766346168	0.0229228083662148
2008011	12	0.00992460962203555	0.0205739586687432
2008011	13	0.0103470182595851	0.0217718515787323
2008011	14	0.0111121089529102	0.0205475530133356
2008011	15	0.012992928019935	0.0206658815013329
2008011	16	0.0135939908651692	0.0185827377507766
2008011	17	0.0121980891282888	0.0156238832529232
2008011	18	0.0102800026534222	0.0141201834327521
2008011	19	0.00986120846991921	0.0143119140625003
2008011	20	0.00921839853778331	0.0144677201942013
2008011	21	0.00953931896796966	0.0142347651123598
2008011	22	0.0139941727277808	0.0209145598894809
2008011	23	0.0202629960640967	0.0324381212613229
2008012	0	0.0216217270556132	0.0375812192694397
2008012	1	0.0205909593849973	0.0359353914830989
2008012	2	0.0170752352587553	0.0296175866736138
2008012	3	0.0117053199611803	0.0219030050272496
2008012	4	0.0119589847869681	0.0290087299992256
2008012	5	0.0688249697139661	0.164134953452023
2008012	6	0.156131252612891	0.357277745534245
2008012	7	0.131020631777456	0.34362087658593
2008012	8	0.0624591130685619	0.229131552470847
2008012	9	0.0664719971886961	0.298141752721362
2008012	10	0.138038071608502	0.64284230121291
2008012	11	0.189121461997598	0.783276655803075
2008012	12	0.179413135736738	0.679816313717483
2008012	13	0.144031103945768	0.467667433361468
2008012	14	0.131532277643982	0.406219339547206
2008012	15	0.107434593430564	0.330977118552498
2008012	16	0.080623892925754	0.343752777375601
2008012	17	0.0753488928050438	0.436416967251203
2008012	18	0.0751968124751473	0.457099600076495
2008012	19	0.0786486759403048	0.41156004449054
2008012	20	0.0879485307146633	0.408402923107066
2008012	21	0.093626646081885	0.389083820998302
2008012	22	0.0979710488265976	0.309073896253219
2008012	23	0.101358561045722	0.248497529046948
2008013	0	0.101293939699766	0.226030889415581
2008013	1	0.109910188745776	0.242484926894665
2008013	2	0.115125412746217	0.265410040079345
2008013	3	0.124951542625612	0.261469702093296
2008013	4	0.140066847380605	0.248543140926921
2008013	5	0.172385903622787	0.265823142543151
2008013	6	0.205917000320937	0.314321037414887
2008013	7	0.220812719025645	0.334504252889511
2008013	8	0.226533629815425	0.344413106206414
2008013	9	0.228845582880796	0.453423232582102
2008013	10	0.216512463151188	0.727232793922969
2008013	11	0.194071826106676	0.814507426901085
2008013	12	0.179738812588448	0.631267388152174
2008013	13	0.177996874722531	0.477866465228659
2008013	14	0.181252832625001	0.391534637191592
2008013	15	0.17640909332702	0.289013545607525
2008013	16	0.171942231665103	0.241613623665939
2008013	17	0.155300951145953	0.211391856754775
2008013	18	0.127128416483868	0.186573703437033
2008013	19	0.113880869938474	0.227354547330922
2008013	20	0.106780983167603	0.266420353772908
2008013	21	0.106343026082229	0.268995105716498
2008013	22	0.108503368096353	0.247482957982288
2008013	23	0.106684434992429	0.219713399767274
2008014	0	0.106811830431048	0.201558077058613
2008014	1	0.103216879207759	0.192120847756288
2008014	2	0.100212694327513	0.184943398321447
2008014	3	0.0984762436289279	0.176728595656875
2008014	4	0.0964707892642159	0.164037935494088
2008014	5	0.0924790106569888	0.152868617763789
2008014	6	0.0930521501032805	0.179421507683156
2008014	7	0.0927520276582213	0.147601164177384
2008014	8	0.0938783062481157	0.135264024155086
2008014	9	0.0988682662448522	0.131912830951172
2008014	10	0.105139623054468	0.144902963420874
2008014	11	0.0967582944879003	0.129017984516277
2008014	12	0.087966820227976	0.106559657932071
2008014	13	0.0914082115340141	0.10859370932487
2008014	14	0.107788901117757	0.130263372631611
2008014	15	0.10743488118297	0.13454149675406
2008014	16	0.100848470326536	0.12526981484089
2008014	17	0.0970054333739393	0.119490953411858
2008014	18	0.0960567573864918	0.121158776933116
2008014	19	0.104241102145396	0.138580310603911
2008014	20	0.123255903672233	0.170947120851718
2008014	21	0.138011794555903	0.190597256544123
2008014	22	0.139380919285701	0.181845029525902
2008014	23	0.132978389353131	0.172237394602955
2008015	0	0.124431434990574	0.15843553585904
2008015	1	0.113904000104078	0.143300202436347
2008015	2	0.0998163712283199	0.127989887319802
2008015	3	0.0863694873962159	0.128220031517758
2008015	4	0.0759207285666507	0.139264836950703
2008015	5	0.0611698199874427	0.128889667376111
2008015	6	0.0511701201325693	0.116929985511218
2008015	7	0.0510907317472186	0.149789013266332
2008015	8	0.070976106641125	0.248305690447935
2008015	9	0.10154686621595	0.480995574707147
2008015	10	0.114532693261482	0.529836518745379
2008015	11	0.123016079623163	0.509715329403949
2008015	12	0.112738238704911	0.436303580972774
2008015	13	0.0898077070643772	0.334188842570634
2008015	14	0.104628585696035	0.376067712818776
2008015	15	0.0812524975888492	0.218610811157341
2008015	16	0.0692106242818492	0.188629155753004
2008015	17	0.0700543770971456	0.195258050072638
2008015	18	0.0742286460675494	0.20088549479659
2008015	19	0.0770093788637802	0.157523120396194
2008015	20	0.0806855614291905	0.13959930933279
2008015	21	0.0848922020384167	0.13793807949713
2008015	22	0.0803722990302429	0.128674852888616
2008015	23	0.0633982909505135	0.100632347770667
2008016	0	0.0395564116057184	0.0597219630546625
2008016	1	0.0175294897173105	0.0274101608228706
2008016	2	0.0139784465892768	0.0281045219678115
2008016	3	0.0135368349932775	0.0262904994429651
2008016	4	0.0109522479910866	0.023627766038308
2008016	5	0.00941507747607769	0.0232349138834652
2008016	6	0.0126602678392158	0.0519886456167846
2008016	7	0.0187005278220901	0.0962047971439736
2008016	8	0.0208442156440498	0.111998124281429
2008016	9	0.0275301650581916	0.191177309701148
2008016	10	0.0699950376715261	0.444839582710652
2008016	11	0.0945558114961984	0.485318576396338
2008016	12	0.0895247334749098	0.428131301411666
2008016	13	0.0759273234728033	0.322562194952988
2008016	14	0.0881645854510237	0.277922240555645
2008016	15	0.102319862384666	0.263263715489522
2008016	16	0.101551592999107	0.237129534116396
2008016	17	0.0939890500365105	0.21187466165468
2008016	18	0.0899055279947179	0.180592041350689
2008016	19	0.0938145615573149	0.156591512746121
2008016	20	0.10865002186271	0.179986484332829
2008016	21	0.116622344415296	0.214087030728838
2008016	22	0.123594720622066	0.24883006275707
2008016	23	0.133310821870762	0.310542459340852
2008017	0	0.138307928703065	0.298475081727283
2008017	1	0.133716093913556	0.226717880057922
2008017	2	0.125559468159317	0.193176654066637
2008017	3	0.109943442259974	0.164162211658588
2008017	4	0.0780823098741191	0.11624973677164
2008017	5	0.0465328346761287	0.0793283656431185
2008017	6	0.0516252402353304	0.0981274583205159
2008017	7	0.0656858989395957	0.119935564659373
2008017	8	0.074416258732083	0.13370435053078
2008017	9	0.0768095194565913	0.181561520510253
2008017	10	0.0772304269977998	0.216861078674785
2008017	11	0.0755316830597195	0.174694149706108
2008017	12	0.0748690386831642	0.17408549488066
2008017	13	0.0750903070667983	0.155389934959383
2008017	14	0.119232283162214	0.282408269851616
2008017	15	0.12346953070126	0.255771563385889
2008017	16	0.091585371698482	0.173534614978499
2008017	17	0.0934603578347249	0.208357805015084
2008017	18	0.0966555518550216	0.232553979839252
2008017	19	0.0840721326532797	0.204752029184635
2008017	20	0.0755154710049999	0.180224234017412
2008017	21	0.04995366479274	0.123871348058325
2008017	22	0.0683238033026003	0.150013070478163
2008017	23	0.0934904002534258	0.154249902478189
2008018	0	0.0700517407624603	0.215769849611614
2008018	1	0.0987211570309843	0.682740801009027
2008018	2	0.0492098818448418	0.406479471365637
2008018	3	0.00575303136084142	0.0411706410579507
2008018	4	0.0435864274236449	0.616566612345346
2008018	5	0.222246473935234	2.18320751441932
2008018	6	0.136331569044429	0.852923918968255
2008018	7	0.0658394824791118	0.308296716175434
2008018	8	0.138853797236928	1.62564549280913
2008018	9	0.18233680218765	2.23066256891235
2008018	10	0.157719165267437	1.72040891337669
2008018	11	0.143433689429653	1.36183465385056
2008018	12	0.170708292034854	1.30579120978237
2008018	13	0.177756689094723	1.2280262217522
2008018	14	0.20674510530967	1.2955073708802
2008018	15	0.228737993332043	1.40043531049823
2008018	16	0.220088699752868	0.952193821206118
2008018	17	0.23917261380886	0.857755863513159
2008018	18	0.244819277239001	0.937339935195892
2008018	19	0.204050382120722	0.756286278288318
2008018	20	0.195101433232977	0.515634229633045
2008018	21	0.326468848807292	0.712038018553266
2008018	22	0.149857521929787	0.266883546225915
2008018	23	0.176818890056478	0.473438421218896
2008019	0	0.338463578982479	1.03731922668749
2008019	1	0.403295645491952	1.58566008575263
2008019	2	0.460420856634301	2.3563511249888
2008019	3	0.24446985144229	1.21581342497669
2008019	4	0.339385745432186	1.56528641511296
2008019	5	0.355838452015611	1.26957482223858
2008019	6	0.179854158340753	0.665543776221156
2008019	7	0.0372810033693713	0.203345278667377
2008019	8	0.0166536876679268	0.0915155829999508
2008019	9	0.0101683450473756	0.0693246085304311
2008019	10	0.0278680924265939	0.241089346857452
2008019	11	0.111453620631131	0.805111955529762
2008019	12	0.210071655817443	1.53671814788057
2008019	13	0.26090107345401	1.91623548332278
2008019	14	0.291985853366769	2.07035441150284
2008019	15	0.39538225192601	2.66626650156509
2008019	16	0.398875704721352	2.96016821949057
2008019	17	0.374474787906895	2.79891192305852
2008019	18	0.313351282471226	2.49522640203762
2008019	19	0.273230420875029	2.33211949562319
2008019	20	0.255913997169918	2.24020553017946
2008019	21	0.250168296806399	1.89355470512968
2008019	22	0.253773563188223	1.32002956737777
2008019	23	0.253751225682299	0.913647034588279
2008020	0	0.243389382332533	0.657641433141462
2008020	1	0.233402398280492	0.578510138694108
2008020	2	0.231941778700579	0.675355097418153
2008020	3	0.236167392318996	0.841084498209806
2008020	4	0.236721822251827	0.896041751879858
2008020	5	0.227096491259182	0.800386493149852
2008020	6	0.20391633493663	1.3507975185631
2008020	7	0.126057996990084	0.787628422489545
2008020	8	0.0485814796573772	0.289184948378406
2008020	9	0.0145228270059753	0.0890329059302272
2008020	10	0.0043312722800857	0.013632686585864
2008020	11	0.00231518391469559	0.00349221439024223
2008020	12	0.0020201127633523	0.0027309109313537
2008020	13	0.00191052331798632	0.00255091018682252
2008020	14	0.0018230819158131	0.00249501912290336
2008020	15	0.00294263870717947	0.00865165242816456
2008020	16	0.0276244333709936	0.107125748152467
2008020	17	0.0685992263620149	0.285437279935022
2008020	18	0.0725398481143836	0.31596632326911
2008020	19	0.0585788032896444	0.250989626210895
2008020	20	0.032241957927804	0.148506233871496
2008020	21	0.0206406276992769	0.11117314062067
2008020	22	0.0168479867619688	0.112583232458418
2008020	23	0.0159053026113193	0.10989184872494
2008021	0	0.0149631060425008	0.0916510581640967
2008021	1	0.0015134966417256	0.00428123889673113
2008021	2	0.000846595523035566	0.000926137930152049
2008021	3	0.000854530689050656	0.000917614311286996
2008021	4	0.000877612174418696	0.000972514293794469
2008021	5	0.000853549567867444	0.000928195941989812
2008021	6	0.000827776067830176	0.00140882518918919
2008021	7	0.0013851190780848	0.00854335146758519
2008021	8	0.00400867346570739	0.0360595490559291
2008021	9	0.00546761322023383	0.0559228048032581
2008021	10	0.00186771028061368	0.0129528514360236
2008021	11	0.000962301642421797	0.00271761356053488
2008021	12	0.00069052429103404	0.00107078149457231
2008021	13	0.000576485416292511	0.000662249892612725
2008021	14	0.000520872472275528	0.000549464682939196
2008021	15	0.000869767754461871	0.00208370964190483
2008021	16	0.00217637179698588	0.00889393291889278
2008021	17	0.0164543414183382	0.0476660105568295
2008021	18	0.0407289501104304	0.123601158983255
2008021	19	0.0349166071985536	0.104980842461171
2008021	20	0.0340241005394538	0.146847044946073
2008021	21	0.0175855277473678	0.0739950087402985
2008021	22	0.00697272563639592	0.0342872400984947
2008021	23	0.00444968224354439	0.0267263579274137
2008022	0	0.00372905758816346	0.0349297771044776
2008022	1	0.00556569954449762	0.0402775045884858
2008022	2	0.0408977035185771	0.171550059505706
2008022	3	0.140961971922777	1.12883577719967
2008022	4	0.265604968743007	2.38986629061428
2008022	5	0.47591288541602	2.38322105318545
2008022	6	0.578780589209514	2.17852996949363
2008022	7	0.590948532369985	1.8092662021364
2008022	8	0.603852299969287	1.62319327676182
2008022	9	0.635250751202488	2.08113350203279
2008022	10	0.658474667490285	2.13399896518041
2008022	11	0.639487308591334	1.80180636306403
2008022	12	0.556578356426679	1.50041622305647
2008022	13	0.489073899264321	1.32987804251026
2008022	14	0.446855048622333	1.32260764598612
2008022	15	0.413761480273865	1.26825304727857
2008022	16	0.3791610002426	0.929310090260562
2008022	17	0.31845924232879	0.714197005829935
2008022	18	0.240084767215898	0.593844451005813
2008022	19	0.182040409705876	0.494375690341043
2008022	20	0.145219266278797	0.447148594357891
2008022	21	0.130615971379505	0.424251206620821
2008022	22	0.125478175348185	0.404329890960647
2008022	23	0.125693901866606	0.390606224430062
2008023	0	0.125969576625916	0.388581076616089
2008023	1	0.146078048046503	0.420303527476851
2008023	2	0.179636202737668	0.49928853080457
2008023	3	0.220075442490054	0.782704367272734
2008023	4	0.230340164010152	0.679729512795898
2008023	5	0.225893721993995	0.582446541401654
2008023	6	0.246939834544025	0.590435288618183
2008023	7	0.273637356380169	0.509718242505197
2008023	8	0.294837948170516	0.513184887488745
2008023	9	0.386898921409792	0.598342919748217
2008023	10	0.430862491009212	0.667527762641371
2008023	11	0.374072506812434	0.61588650913478
2008023	12	0.272092457971303	0.528178573565984
2008023	13	0.195499450411581	0.391900932097368
2008023	14	0.154808462699105	0.274782431088212
2008023	15	0.143046907248134	0.210156762947231
2008023	16	0.140958834066926	0.203410301143497
2008023	17	0.124012049290978	0.17252647279027
2008023	18	0.0615283324070869	0.0808760724189154
2008023	19	0.0203401636230919	0.0302985211214084
2008023	20	0.0414736022038593	0.156755136366992
2008023	21	0.142342611844817	0.41224005786356
2008023	22	0.174738766423865	0.368793527741877
2008023	23	0.17884699438877	0.327181290038638
2008024	0	0.175177862756507	0.306025732268228
2008024	1	0.161341216065326	0.292603014202024
2008024	2	0.146987102844421	0.296287358093972
2008024	3	0.143698866799606	0.323587498926668
2008024	4	0.141468763604801	0.375978648146613
2008024	5	0.129787482395071	0.353320399558582
2008024	6	0.11010388427707	0.267177284773845
2008024	7	0.104098197184598	0.24140018747023
2008024	8	0.124429656984888	0.298330069071305
2008024	9	0.147363037446486	0.388930261572529
2008024	10	0.166396343943214	0.510766925332688
2008024	11	0.154784509377819	0.54941286352715
2008024	12	0.11443819463719	0.321426438553375
2008024	13	0.0707090864387641	0.395329174090421
2008024	14	0.141028389297556	1.30687971935782
2008024	15	0.26550604288147	2.48971242754428
2008024	16	0.390040683761892	3.22765105388029
2008024	17	0.414851089035264	2.91656278229124
2008024	18	0.366770649987827	2.42030167613532
2008024	19	0.265186483546588	2.41541826654349
2008024	20	0.214760732840906	2.87202144882008
2008024	21	0.212002484834723	3.28652230922966
2008024	22	0.193422476977366	2.99692657887906
2008024	23	0.183265804780563	2.96689754086091
2008025	0	0.202149612511716	2.65190975584378
2008025	1	0.242232786718576	2.29770435795743
2008025	2	0.252368275091738	1.8472587441717
2008025	3	0.282293104285821	1.63341190136262
2008025	4	0.30225945652729	1.26955423039761
2008025	5	0.297059558975815	1.18532261246684
2008025	6	0.24686554032236	0.987582168680565
2008025	7	0.206798532296128	1.00072368358471
2008025	8	0.207454854410288	1.09804311213074
2008025	9	0.233999229851103	1.22509868738163
2008025	10	0.271211261898236	1.4488477082922
2008025	11	0.311864948669899	1.65623930646626
2008025	12	0.340963328473459	1.73132154967459
2008025	13	0.367490936124682	1.80736619048024
2008025	14	0.386932056404716	1.84301379424161
2008025	15	0.392537297951946	1.88659319194951
2008025	16	0.389964076722146	2.01229854785832
2008025	17	0.375502044192759	1.97383948794983
2008025	18	0.346425979500231	1.78587864918384
2008025	19	0.32279376463842	1.67876764422556
2008025	20	0.323582299020702	1.76038441227722
2008025	21	0.34077028598507	2.06222448897251
2008025	22	0.359411229878305	2.19424089688504
2008025	23	0.369843845232772	2.21617775789975
2008026	0	0.367952505585973	2.1739548067383
2008026	1	0.368883837345551	2.03795367459416
2008026	2	0.382514017871615	2.13298825286396
2008026	3	0.415355293433404	2.38538537065181
2008026	4	0.428385622714196	2.4956147779178
2008026	5	0.424596284346676	2.45089645781926
2008026	6	0.42119294076983	2.32959645462047
2008026	7	0.420800682418655	2.29642621920327
2008026	8	0.418442218013909	2.34171244647926
2008026	9	0.405059788441957	2.58032016648811
2008026	10	0.393169015815833	2.64267114585047
2008026	11	0.410439140736815	2.88399832260791
2008026	12	0.458384140608388	3.44241286276927
2008026	13	0.515346686205099	3.98619798446175
2008026	14	0.545762318066877	4.41747926446645
2008026	15	0.46789023041753	4.37534652967929
2008026	16	0.300897948990278	3.48669880880461
2008026	17	0.2513219085258	3.27918060476517
2008026	18	0.30838417117865	4.08101616400208
2008026	19	0.371896513974569	4.64282420276081
2008026	20	0.362534842501833	4.53229551652512
2008026	21	0.442885942639233	5.81872270051928
2008026	22	0.452421654302899	5.71342189297547
2008026	23	0.435067299503593	5.26080840195038
2008027	0	0.428041919743634	4.81958420281543
2008027	1	0.406683939809101	4.25493022703143
2008027	2	0.377426232163894	3.64525095175207
2008027	3	0.342567721690515	2.75536585902582
2008027	4	0.164599871749177	1.05578100164158
2008027	5	0.0654850861393076	0.355743930421679
2008027	6	0.0236849723044843	0.105065199792195
2008027	7	0.0169370912952798	0.0571391728791779
2008027	8	0.0170207415699018	0.0482433330211983
2008027	9	0.0160673383910648	0.0397445154144272
2008027	10	0.0136438282886914	0.0291580192042074
2008027	11	0.0110092008598984	0.0223609702197687
2008027	12	0.0268749319493922	0.0829806190958032
2008027	13	0.129200170512792	0.497072801119754
2008027	14	0.259186896847489	0.785520010548753
2008027	15	0.30365082790893	0.74085458265257
2008027	16	0.442282410781918	1.0876604396385
2008027	17	0.605400775927009	1.47173794960151
2008027	18	0.753506157533825	1.66382756855862
2008027	19	0.832937240298803	1.62314291067103
2008027	20	0.861080506361023	1.46354816387175
2008027	21	0.915595091009423	1.47522751547815
2008027	22	0.983308862992992	1.58172926097758
2008027	23	1.04967784124258	1.68825427472533
2008028	0	1.12789505116753	1.78728933313387
2008028	1	1.18184978372115	2.02506660802813
2008028	2	1.16807727279839	2.17484716116365
2008028	3	1.12386712845101	2.27251009225793
2008028	4	1.04975621813025	2.07904548416148
2008028	5	0.870449705106117	1.68605108250019
2008028	6	0.83981624102664	1.63891453724958
2008028	7	0.873587524362147	1.715903554564
2008028	8	0.887494786403196	1.66743792924985
2008028	9	0.782214560904423	1.73357332245564
2008028	10	0.68348775567548	1.83895794714221
2008028	11	0.667108380192641	2.64608898927352
2008028	12	0.650408031033016	2.78690160312641
2008028	13	0.611789217263758	2.25879292584601
2008028	14	0.577067598399038	1.75352529841324
2008028	15	0.497015885716799	1.25305152377868
2008028	16	0.360008420233782	0.679754933793622
2008028	17	0.301912138056754	0.510229331105115
2008028	18	0.287298311095804	0.466833601709472
2008028	19	0.265969905711554	0.412109070997015
2008028	20	0.242135484290863	0.355804743202175
2008028	21	0.239785275033497	0.333973964750611
2008028	22	0.245227096582357	0.334753113131211
2008028	23	0.238987067555036	0.355152907275382
2008029	0	0.213264841790924	0.468328367257442
2008029	1	0.199044564192834	0.53669599979143
2008029	2	0.189647018515932	0.592460782339854
2008029	3	0.179387209751832	0.633542705428673
2008029	4	0.174531011784375	0.698087920868194
2008029	5	0.174735848338862	0.788213563886461
2008029	6	0.162556686701084	0.709763167496194
2008029	7	0.155007750590745	0.656560799239255
2008029	8	0.165016833217724	0.643928873608997
2008029	9	0.1695247840889	0.652286903798439
2008029	10	0.178912658629695	0.687204727915879
2008029	11	0.18540203408666	0.689647221729042
2008029	12	0.185710814495506	0.670012652840613
2008029	13	0.178600775228349	0.653102461135153
2008029	14	0.172108082429099	0.686918949594443
2008029	15	0.164175710946507	0.646720689713959
2008029	16	0.156750086682544	0.58545069883564
2008029	17	0.153341831026938	0.538049121574739
2008029	18	0.150517802525873	0.501184164892996
2008029	19	0.154087135069357	0.471841592801638
2008029	20	0.159296512556748	0.447602478275568
2008029	21	0.169199170521011	0.434532349171982
2008029	22	0.221858635611446	0.508756503929301
2008029	23	0.252317510333318	0.547829953584106
2008030	0	0.284062052894615	0.59204080328155
2008030	1	0.307701170300147	0.616810333380115
2008030	2	0.319497886644396	0.617006575714085
2008030	3	0.302542446207709	0.58914555510715
2008030	4	0.277395614189535	0.548892992826943
2008030	5	0.24191083175612	0.481106359515299
2008030	6	0.19106402815864	0.381857863190054
2008030	7	0.150652597698598	0.296360475634644
2008030	8	0.119744553071539	0.242015929606325
2008030	9	0.105141529911182	0.232174324253629
2008030	10	0.0891441339457814	0.233522975680687
2008030	11	0.0717395826354977	0.218325633971724
2008030	12	0.0521188409311243	0.173950146566333
2008030	13	0.0485464419679368	0.121415900897278
2008030	14	0.100456981641155	0.178293810177768
2008030	15	0.123924593839058	0.176355455850634
2008030	16	0.131972173736121	0.217693140064216
2008030	17	0.155320878597476	0.242750776303265
2008030	18	0.243377791573391	0.535118236138029
2008030	19	0.291737783984042	0.84433327847733
2008030	20	0.289335890488692	0.722549090707598
2008030	21	0.233704706228613	0.579090045806927
2008030	22	0.174474837210091	0.65780579526823
2008030	23	0.160675221924234	0.886137261351061
2008031	0	0.189439064543713	0.913683185350634
2008031	1	0.202269600578008	0.547853949156895
2008031	2	0.220647525149023	0.483786398414463
2008031	3	0.242745269256491	0.504381552576402
2008031	4	0.253239485215858	0.567840365470165
2008031	5	0.261925790724351	0.608062001402473
2008031	6	0.267908202219949	0.738600321696899
2008031	7	0.292833860763528	1.17887736324184
2008031	8	0.344544501121803	1.45902364325198
2008031	9	0.302809754689117	1.04918402389865
2008031	10	0.205137234065314	0.575885496268311
2008031	11	0.155826998989247	0.381547528822763
2008031	12	0.121023352349424	0.277011097992175
2008031	13	0.0890729759542185	0.204591941818307
2008031	14	0.0734123382571033	0.158071557344423
2008031	15	0.0668519869233915	0.134593130032931
2008031	16	0.0641385898956636	0.12498135221167
2008031	17	0.0597272035755209	0.11671058258232
2008031	18	0.0613530499210275	0.186168494417415
2008031	19	0.0848548388125421	0.364695235945353
2008031	20	0.101936512620818	0.375037908976624
2008031	21	0.106036561343224	0.302491535296853
2008031	22	0.0972193240906104	0.270643323192065
2008031	23	0.0826265499314522	0.321028675692295
2008032	0	0.0789467838652133	0.541438330476155
2008032	1	0.0866523176255386	0.614279120792546
2008032	2	0.125034441213714	0.665178858299544
2008032	3	0.20715660999763	0.924446678243085
2008032	4	0.293338785104631	1.27691032275017
2008032	5	0.349744911616864	1.42616427362136
2008032	6	0.406954188915844	1.78683280744698
2008032	7	0.410521246407662	1.66755611527091
2008032	8	0.422929772130312	1.53282431182181
2008032	9	0.43008512777503	1.72225268813139
2008032	10	0.437969580953464	2.10204601831215
2008032	11	0.412523395275576	2.1281134659686
2008032	12	0.389196018717397	2.14846387707093
2008032	13	0.390096133735245	2.65059882649752
2008032	14	0.410674544768359	3.40115657132328
2008032	15	0.399151056860497	3.16917057411481
2008032	16	0.389827998794144	2.60972005586547
2008032	17	0.397255130763208	1.96508949962015
2008032	18	0.436407402444956	2.26183873385592
2008032	19	0.49917809569179	2.61683390538027
2008032	20	0.577933867221908	2.75684927797253
2008032	21	0.605857026346076	2.36843040053753
2008032	22	0.554036008156938	3.48608084403795
2008032	23	0.54731392849609	4.4276373921376
2008033	0	0.635053039805333	3.86257956850581
2008033	1	0.460995134484206	3.06000486165303
2008033	2	0.554966644038904	9.38613988805159
2008033	3	0.709568096822832	7.44334510575598
2008033	4	0.677718132994883	4.57919645963148
2008033	5	0.58929487200646	4.10264177838521
2008033	6	0.498206155294162	4.14835459032783
2008033	7	0.664614870335093	7.89076418095029
2008033	8	0.851322212671298	10.6577543742619
2008033	9	0.799616357207426	9.55357932647191
2008033	10	0.654614056334384	7.4454811056855
2008033	11	0.48104478616678	5.6419412987046
2008033	12	0.450087398841418	5.05159888642562
2008033	13	0.475839060995751	5.13588077563966
2008033	14	0.487006142501509	4.69837352590183
2008033	15	0.481359400344522	4.289699485324
2008033	16	0.430222883984635	2.96665830403908
2008033	17	0.354714952112502	2.17916388425851
2008033	18	0.301086329764468	1.8779376520007
2008033	19	0.356378163165507	2.16273488765322
2008033	20	0.446256870905489	1.93367778659447
2008033	21	0.404889632576558	1.08464557790419
2008033	22	0.386587879958999	0.787591779085544
2008033	23	0.447609529189456	0.78807124219488
2008034	0	0.490507128986579	0.823664748680448
2008034	1	0.501927100102359	0.781109518510693
2008034	2	0.495323746010982	0.77344982635661
2008034	3	0.489282872268623	0.792899636258874
2008034	4	0.48864291946426	0.736229672995987
2008034	5	0.473759122271022	0.692004475590994
2008034	6	0.455302828585497	0.687398528989388
2008034	7	0.436162865797859	0.641254034720957
2008034	8	0.420894204494439	0.566870930062027
2008034	9	0.420360166975992	0.772536209578949
2008034	10	0.417628979426995	1.10030129754684
2008034	11	0.382808903758877	0.894060958600902
2008034	12	0.329537128166089	0.783794426297046
2008034	13	0.295758370912667	0.505375855611074
2008034	14	0.278484708907155	0.443008537918471
2008034	15	0.27344731882792	0.504567647299236
2008034	16	0.26752832818476	0.548682666495279
2008034	17	0.247217819532971	0.348548815390097
2008034	18	0.254158463905438	0.478975385099326
2008034	19	0.264595706701296	0.450902722568998
2008034	20	0.262640409128779	0.416089698634633
2008034	21	0.259993851555912	0.382984644392894
2008034	22	0.258179765123606	0.365064905519475
2008034	23	0.261864796879273	0.352826350151678
2008035	0	0.267257884787518	0.351891376971261
2008035	1	0.274382128412249	0.351625295066743
2008035	2	0.280504597705426	0.351714509800636
2008035	3	0.287947448980012	0.353483505963313
2008035	4	0.296232822600535	0.358719017539504
2008035	5	0.3063209130712	0.376674605935393
2008035	6	0.320704891509636	0.427580284151115
2008035	7	0.320983196241534	0.443231247059012
2008035	8	0.328669440993183	0.485074969288429
2008035	9	0.333748174491138	0.483512064356812
2008035	10	0.325436408887524	0.449068355548549
2008035	11	0.315935114749093	0.400429029233933
2008035	12	0.304124213600601	0.369269817412338
2008035	13	0.285349497429213	0.34089697428359
2008035	14	0.25969469486947	0.306840815972642
2008035	15	0.236647312328063	0.283541975038638
2008035	16	0.183713046050924	0.227954054685555
2008035	17	0.082620214907658	0.114576492919388
2008035	18	0.0663413757303593	0.126325983406093
2008035	19	0.0607326763700807	0.141952033517841
2008035	20	0.0621116635507739	0.159337820531904
2008035	21	0.0633239983255523	0.142637327949488
2008035	22	0.0640696004258023	0.139333300686113
2008035	23	0.0632905239169488	0.140109579141308
2008036	0	0.0640161500069003	0.158438272787414
2008036	1	0.069205417114003	0.20964648081037
2008036	2	0.0840125169722243	0.207585021817129
2008036	3	0.0895249164991725	0.245513430525951
2008036	4	0.0908568662735255	0.331163791926904
2008036	5	0.0990266579062806	0.334003824093635
2008036	6	0.100554891576828	0.255427835479451
2008036	7	0.101972480219392	0.2347382758612
2008036	8	0.109655139224397	0.281742465021249
2008036	9	0.112165759742121	0.336784030616053
2008036	10	0.103569121817664	0.324503498529558
2008036	11	0.0937902076588526	0.300084795097443
2008036	12	0.096295931868398	0.434201841095947
2008036	13	0.123759826844674	0.655933345409875
2008036	14	0.161979163332936	0.807982017497298
2008036	15	0.13656923450025	0.518386820608066
2008036	16	0.147120726159324	0.361141819512686
2008036	17	0.120312658884149	0.222033597385901
2008036	18	0.0648304894305056	0.119708439784096
2008036	19	0.0285074401962765	0.0642375823431951
2008036	20	0.0297188286598113	0.0793961935509039
2008036	21	0.0831524316806683	0.244945705431427
2008036	22	0.155008979008518	0.369911173986264
2008036	23	0.160897448122361	0.346909344771172
2008037	0	0.0157174244142651	0.0256340187450568
2008037	1	0.0131992092118362	0.0433870101548995
2008037	2	0.0570079351575251	0.305075271101432
2008037	3	0.191660947861604	1.71260301145371
2008037	4	0.237926834800078	1.93523896421654
2008037	5	0.20367800194172	1.32960021770665
2008037	6	0.0692458500522772	0.29911729856249
2008037	7	0.030871844357429	0.205105252192256
2008037	8	0.121002676878291	0.662364047069864
2008037	9	0.0796369605442207	0.612649663116879
2008037	10	0.0140120580957319	0.0821059215041131
2008037	11	0.178279794488486	2.06860228188
2008037	12	0.590867537838548	6.92425304264009
2008037	13	0.558067618261859	6.70956043617127
2008037	14	0.522847460464263	6.86510924904084
2008037	15	0.587975540048637	7.81719833217516
2008037	16	0.628660215788458	7.58827249062921
2008037	17	0.588415282919889	7.48395345210292
2008037	18	0.549567927407758	7.24232040070234
2008037	19	0.54831312555026	7.33625568368356
2008037	20	0.502683088683755	5.9365462810661
2008037	21	0.455517371597421	5.60213336968859
2008037	22	0.491175385548544	6.85045227157215
2008037	23	0.429857370027611	6.61997842762191
2008038	0	0.385057118027846	6.34208767706083
2008038	1	0.34451398876511	5.43092901262551
2008038	2	0.307932089065106	4.8402108919949
2008038	3	0.279283051451211	4.94368120124555
2008038	4	0.279056272088474	4.80988803090471
2008038	5	0.272609376106761	4.71987681045505
2008038	6	0.266517665811632	4.99128217496891
2008038	7	0.273372723241627	5.21221760994842
2008038	8	0.279362610231959	4.35207768712645
2008038	9	0.294114729228878	3.88093649247059
2008038	10	0.33907806161996	3.54347770325271
2008038	11	0.357198255345206	3.0037602909864
2008038	12	0.35025635703011	1.89029286185721
2008038	13	0.351018596615311	1.34363853685513
2008038	14	0.355524458650592	0.995015088333812
2008038	15	0.357699959632604	0.823606470124735
2008038	16	0.352193277901531	0.718068981176182
2008038	17	0.344889657339788	0.614086515049487
2008038	18	0.341282001629228	0.564579975545404
2008038	19	0.340268493862936	0.560313506956837
2008038	20	0.352865213013138	0.569409611630797
2008038	21	0.38287421072534	0.517790773883109
2008038	22	0.390274141926306	0.51147865049504
2008038	23	0.406813396757035	0.502544695185316
2008039	0	0.418548234075333	0.513988588989617
2008039	1	0.416744945244567	0.555526626283134
2008039	2	0.408944225444637	0.566610040477287
2008039	3	0.405151390812613	0.580467193544522
2008039	4	0.373080330382567	0.59111125269487
2008039	5	0.350607590219108	0.606806565719387
2008039	6	0.354355062679138	0.589212086521048
2008039	7	0.34611928357923	0.566178857265477
2008039	8	0.332353985640028	0.548523279721026
2008039	9	0.323828998061786	0.543831936707897
2008039	10	0.312184768357422	0.523186504997029
2008039	11	0.286809950679324	0.527758122976973
2008039	12	0.23544623275683	0.668388832576995
2008039	13	0.211383619102184	0.557388566583971
2008039	14	0.19619718991157	0.534881130001279
2008039	15	0.191681423377947	0.565509307414627
2008039	16	0.193128293089751	0.548959200593901
2008039	17	0.197348924108348	0.50627412122215
2008039	18	0.20705718678996	0.486303164949629
2008039	19	0.2155931282088	0.47412866460896
2008039	20	0.216574307900669	0.446665926282703
2008039	21	0.213876768124655	0.424424321856069
2008039	22	0.210742019210556	0.413191753316597
2008039	23	0.203549184053716	0.408142249643062
2008040	0	0.202271490527123	0.432955122446435
2008040	1	0.198824614620985	0.426479479697222
2008040	2	0.196269119203318	0.4339685323592
2008040	3	0.178949119068335	0.43800594591671
2008040	4	0.169326490878359	0.568733083525846
2008040	5	0.168030158679624	0.596417820547366
2008040	6	0.174803151016189	0.708976070663437
2008040	7	0.182349832103491	0.681761573318154
2008040	8	0.193008085088854	0.691477534787042
2008040	9	0.195287851455189	0.700554353625041
2008040	10	0.182987023884746	0.712859808227104
2008040	11	0.163394026914633	0.84501277774383
2008040	12	0.132675907509931	0.792837212137757
2008040	13	0.118951277824679	0.670412785590998
2008040	14	0.115194668175363	0.638054166277409
2008040	15	0.118616580039708	0.663088458735139
2008040	16	0.120402062084225	0.649336905930374
2008040	17	0.120947264721827	0.63019510233374
2008040	18	0.120513516885976	0.617654730078649
2008040	19	0.118192378641406	0.618636909438733
2008040	20	0.122371500085115	0.658299093101079
2008040	21	0.130306651787383	0.710170673657245
2008040	22	0.138580059222123	0.735101009885698
2008040	23	0.142650090566606	0.741347373305756
2008041	0	0.145294356631498	0.723099292534822
2008041	1	0.14432388577847	0.699963799606208
2008041	2	0.144998291242976	0.672933479312794
2008041	3	0.146415535489469	0.629506062871839
2008041	4	0.145313993070205	0.571831512412984
2008041	5	0.144555985793294	0.532614226238805
2008041	6	0.144248766430663	0.503937635121347
2008041	7	0.142624108837142	0.473068850316502
2008041	8	0.129368027161964	0.436206887715136
2008041	9	0.134660342045125	0.538149019166647
2008041	10	0.126515575103237	0.480187849447599
2008041	11	0.124731026942358	0.561802859761206
2008041	12	0.113902025225195	0.547065458156293
2008041	13	0.103398501870539	0.466857962088405
2008041	14	0.0981461910354539	0.436200873258128
2008041	15	0.094509047876511	0.389991779532813
2008041	16	0.0924137191056504	0.360058500195279
2008041	17	0.0914085639125848	0.334681123432066
2008041	18	0.0904229382891859	0.312778952842943
2008041	19	0.0901174674492496	0.293626723617284
2008041	20	0.0879709413014051	0.277532744875593
2008041	21	0.0856037283156085	0.259161957161565
2008041	22	0.0833676234456643	0.243375691676591
2008041	23	0.0809157874641072	0.231796535334316
2008042	0	0.0797533845407177	0.223747898345391
2008042	1	0.0790592725290451	0.218890453985373
2008042	2	0.0797763089535765	0.21504473784158
2008042	3	0.080380365666859	0.210510948851262
2008042	4	0.0804773331809295	0.205411756643291
2008042	5	0.0808591712429192	0.201262012481843
2008042	6	0.0806833621479462	0.197442759869182
2008042	7	0.0800897848766326	0.192990005505658
2008042	8	0.0794840876914169	0.187563246857324
2008042	9	0.0696344965462715	0.173491338797468
2008042	10	0.0731807930628369	0.303303727652397
2008042	11	0.0789177723477788	0.472089539864592
2008042	12	0.0822106401782215	0.524180771662971
2008042	13	0.0792283850274027	0.491348268743593
2008042	14	0.0787409894228715	0.497121211179645
2008042	15	0.0802461374703158	0.462801502488709
2008042	16	0.0768601933121292	0.389324128280313
2008042	17	0.07489066194873	0.343650559065268
2008042	18	0.0730402109853445	0.311409288180111
2008042	19	0.0719454381363656	0.288079834940171
2008042	20	0.071904801222717	0.270488559977842
2008042	21	0.0706402874757718	0.255327884857988
2008042	22	0.0702874275475136	0.240647071673033
2008042	23	0.0711959672685675	0.228037557468224
2008043	0	0.0716397913323501	0.220660707504989
2008043	1	0.0701967429948431	0.215283677805835
2008043	2	0.0669124520941557	0.210034032762105
2008043	3	0.0643701668886341	0.20578978521758
2008043	4	0.0584965642759154	0.202695784982739
2008043	5	0.0548168670279239	0.205765945892818
2008043	6	0.0561058041043005	0.218987811817811
2008043	7	0.0601190063846269	0.241505610671102
2008043	8	0.0675274752675108	0.269252082479494
2008043	9	0.0765982982790659	0.293217105910817
2008043	10	0.0820021087776623	0.32444014599223
2008043	11	0.117629192906393	0.553520347502283
2008043	12	0.241283977615648	1.0553878500211
2008043	13	0.222419537479606	0.925747543763436
2008043	14	0.207787136565501	0.849599907172991
2008043	15	0.191086781925168	0.810331815714457
2008043	16	0.182470342001284	0.784386307945506
2008043	17	0.169173473133268	0.745135182882258
2008043	18	0.157480559948076	0.678031067115308
2008043	19	0.152883717308419	0.624554744072548
2008043	20	0.147231268472334	0.575286466716989
2008043	21	0.140828817204637	0.532512854993106
2008043	22	0.134896182633817	0.493966213466037
2008043	23	0.130115098770647	0.460750998938522
2008044	0	0.126361384269883	0.428328688686695
2008044	1	0.123517432932807	0.397450411136343
2008044	2	0.121159269467462	0.366888375654816
2008044	3	0.118555256222644	0.337026384127396
2008044	4	0.116649873138754	0.314592846084435
2008044	5	0.120551876850459	0.295382823795789
2008044	6	0.117345980335868	0.275836038718723
2008044	7	0.111151199109727	0.255862222440127
2008044	8	0.110816473481956	0.282727521080776
2008044	9	0.134307276478111	0.38520120947926
2008044	10	0.12355981526906	0.560567629221078
2008044	11	0.113279827982151	0.5253090089931
2008044	12	0.10912951476475	0.463261820489481
2008044	13	0.104038661249717	0.409440738888614
2008044	14	0.0959882127735814	0.359985354328919
2008044	15	0.0845601949474519	0.32184047762238
2008044	16	0.0757244571205656	0.299723247480536
2008044	17	0.0731089251641714	0.3019588267715
2008044	18	0.0706322452177758	0.291793268252895
2008044	19	0.0717825715016737	0.296801674916807
2008044	20	0.0728600859938278	0.305105724764483
2008044	21	0.0732037013865358	0.306912318953317
2008044	22	0.0739043258216156	0.305973758848406
2008044	23	0.0719696682878063	0.306193887669664
2008045	0	0.0742323842812283	0.308133064194837
2008045	1	0.0767004463527794	0.308196982493683
2008045	2	0.0756089800927706	0.303302671253985
2008045	3	0.0775875152632172	0.285389476419664
2008045	4	0.0791259839757785	0.264579903281772
2008045	5	0.0804323929929012	0.241379939353802
2008045	6	0.079590130340859	0.217966154949383
2008045	7	0.077249014648	0.20312679942539
2008045	8	0.0697093356468601	0.200343894586794
2008045	9	0.0860833166630695	0.358770022413539
2008045	10	0.107664350798842	0.524446612888321
2008045	11	0.10778481441287	0.412245198196181
2008045	12	0.0925998836340684	0.301064363183809
2008045	13	0.0893686737576318	0.273125801342485
2008045	14	0.0879622319995526	0.259824951197449
2008045	15	0.0817005017324813	0.207320410367931
2008045	16	0.0809878485993454	0.174659366414905
2008045	17	0.0871623976580698	0.161312589329546
2008045	18	0.097151368326989	0.147806368089422
2008045	19	0.113539316903277	0.152493186889709
2008045	20	0.14383090880393	0.184592931082254
2008045	21	0.184693388551191	0.228796080442809
2008045	22	0.212710223852857	0.252685596717508
2008045	23	0.210381484754899	0.259607839706022
2008046	0	0.200523785602543	0.265064017427039
2008046	1	0.196505184102196	0.253528295737202
2008046	2	0.194706387807546	0.240931234462943
2008046	3	0.186589335260189	0.239193197412181
2008046	4	0.173575780920463	0.260341494491175
2008046	5	0.170296880150356	0.268679138168816
2008046	6	0.182720826220342	0.278035240325408
2008046	7	0.247193434803682	0.350821444935971
2008046	8	0.315346252663143	0.466189631972653
2008046	9	0.328630927177529	0.627411172009404
2008046	10	0.328297735099495	0.747967075669844
2008046	11	0.314289829659638	0.7529129126047
2008046	12	0.286926324982738	0.678708259858488
2008046	13	0.248382113293767	0.584533935554037
2008046	14	0.22317264813462	0.469288302840964
2008046	15	0.204748656997891	0.395401354060059
2008046	16	0.188887697733509	0.336598082639961
2008046	17	0.180418845580661	0.298744518035542
2008046	18	0.176003224482257	0.272214540688248
2008046	19	0.173553047770361	0.266327624179548
2008046	20	0.176618273324172	0.277031629012124
2008046	21	0.18471502012802	0.313772551236415
2008046	22	0.192389608894068	0.334204183054664
2008046	23	0.199962589958331	0.340898750446769
2008047	0	0.203771262116357	0.305205735217122
2008047	1	0.201528213095816	0.276179850511854
2008047	2	0.20060473664201	0.27663908210618
2008047	3	0.20106099509801	0.286691669375981
2008047	4	0.200550967070088	0.298831267612553
2008047	5	0.202787908923079	0.327581791347069
2008047	6	0.206743634381309	0.358449083693048
2008047	7	0.206566868037367	0.356405358677535
2008047	8	0.200475763529704	0.332873610765974
2008047	9	0.195118915568862	0.408077859938284
2008047	10	0.192731911838943	0.465021861864665
2008047	11	0.190580819415991	0.450547077929017
2008047	12	0.188406841348842	0.443739290296082
2008047	13	0.182888939123481	0.373441702387441
2008047	14	0.172768488530637	0.414552647658794
2008047	15	0.169041734054654	0.397366100136062
2008047	16	0.174238406714111	0.39528737097161
2008047	17	0.16634369228452	0.260727626201433
2008047	18	0.159369453006855	0.221148803722889
2008047	19	0.155873460704154	0.214160350761992
2008047	20	0.158632081336549	0.223657075867541
2008047	21	0.156425465333909	0.210765684606446
2008047	22	0.15172917043	0.201179937448281
2008047	23	0.149583282917756	0.209927557879104
2008048	0	0.141783535116977	0.200109785155497
2008048	1	0.138186188353601	0.20416480975579
2008048	2	0.135879237005565	0.19818360079899
2008048	3	0.134300640163471	0.192071870517302
2008048	4	0.129674007386387	0.185017016189917
2008048	5	0.132651916857186	0.214531702927506
2008048	6	0.135062558867744	0.217267739462817
2008048	7	0.135063025901928	0.206282551413696
2008048	8	0.132952487184204	0.183983951144383
2008048	9	0.129369008994067	0.164317910646479
2008048	10	0.126789846930108	0.1567745191094
2008048	11	0.12475819025849	0.154726734140804
2008048	12	0.120187556860826	0.142312730084131
2008048	13	0.116356796118987	0.135229560584166
2008048	14	0.110710472871171	0.12872444959687
2008048	15	0.102454223774125	0.138199059154337
2008048	16	0.0988288140779068	0.128116165403731
2008048	17	0.0972150524484779	0.122457602906332
2008048	18	0.093972807042935	0.121169452023417
2008048	19	0.0911675028549757	0.118510801316746
2008048	20	0.0900683299725931	0.116426710358323
2008048	21	0.0915810951832655	0.13068758387012
2008048	22	0.102935771956439	0.175172998709929
2008048	23	0.101494016422995	0.180723144135338
2008049	0	0.109416283881326	0.248115974770366
2008049	1	0.12074313930731	0.354253702626113
2008049	2	0.123474957726268	0.423073129734867
2008049	3	0.125153089594584	0.513877543527872
2008049	4	0.128821160586767	0.633072416546963
2008049	5	0.139322090205033	0.794934786493792
2008049	6	0.143943880860849	0.8096845268305
2008049	7	0.143242588608424	0.788562138517166
2008049	8	0.141533781237152	0.803982968707542
2008049	9	0.141874095035466	0.822906383526737
2008049	10	0.142402163194197	0.822788039090832
2008049	11	0.141975476555933	0.802545671625656
2008049	12	0.140786658229247	0.863311345397896
2008049	13	0.134964637235729	0.865699755772792
2008049	14	0.133456487845819	0.880468673506697
2008049	15	0.13320128444717	0.862565183104023
2008049	16	0.140364900202424	0.967571709956509
2008049	17	0.156502134655161	1.15260391227595
2008049	18	0.161649558370931	0.968707197854866
2008049	19	0.153723866793905	0.735598543627447
2008049	20	0.140772491901225	0.564788508773275
2008049	21	0.122652357534749	0.471524765582253
2008049	22	0.110135601659757	0.455841749852916
2008049	23	0.0993147902842783	0.42915937538682
2008050	0	0.0909539522771693	0.403436663112308
2008050	1	0.087656029739884	0.393048145617381
2008050	2	0.0900570349536223	0.408760889854491
2008050	3	0.0986157752642562	0.458805161293089
2008050	4	0.109998247894459	0.52507810315234
2008050	5	0.120453257995866	0.580719910679064
2008050	6	0.123890512862708	0.596687819526296
2008050	7	0.121339450329738	0.597616092882445
2008050	8	0.122546472134069	0.63380206976125
2008050	9	0.266879834574626	1.71259256468815
2008050	10	0.338269676309535	1.94994154620807
2008050	11	0.359269848756282	1.93343199393736
2008050	12	0.357738997820001	1.76742331655014
2008050	13	0.315186036002039	1.51989786789658
2008050	14	0.248330305089577	1.29014205461744
2008050	15	0.17387917109378	0.899646069392369
2008050	16	0.11689473367867	0.647775073712663
2008050	17	0.0890752181264601	0.500399577369763
2008050	18	0.0808897306081733	0.419305237085205
2008050	19	0.0800383295800264	0.369193519219565
2008050	20	0.085355612455108	0.333255238243687
2008050	21	0.0864147160530655	0.307496129099616
2008050	22	0.0912582059159202	0.29113727099874
2008050	23	0.0935157131772726	0.280837375155369
2008051	0	0.0969373811672842	0.280056957820698
2008051	1	0.101568869504659	0.29510686067897
2008051	2	0.111703071113254	0.341685093469916
2008051	3	0.126277827784921	0.408416791584739
2008051	4	0.139999794202811	0.480767908886935
2008051	5	0.154411632920961	0.551555720736009
2008051	6	0.159918560831424	0.613685891264333
2008051	7	0.158296278558954	0.661409819166163
2008051	8	0.1489717650803	0.631203169563353
2008051	9	0.142799034921647	0.87573462228704
2008051	10	0.102934031349379	0.554849779524957
2008051	11	0.0697884204578492	0.306135886006016
2008051	12	0.0529499330600786	0.199967741853797
2008051	13	0.0431300104682721	0.143188408714666
2008051	14	0.0347807114714868	0.109015231459059
2008051	15	0.0295574666878258	0.0936978614910927
2008051	16	0.0271418562835629	0.0869300931050989
2008051	17	0.025616322023841	0.0828592584230048
2008051	18	0.0247311662158948	0.0799522091073431
2008051	19	0.0239481932810307	0.0765684889698443
2008051	20	0.0243154788407965	0.0761543068643689
2008051	21	0.0269119387724757	0.0797013958260458
2008051	22	0.032753127393966	0.0878645368385405
2008051	23	0.0382944550549647	0.0983869148460178
2008052	0	0.0407887134226708	0.104948110524709
2008052	1	0.0424331721434912	0.106876607297098
2008052	2	0.0426463778942183	0.106563403014125
2008052	3	0.0425510712324771	0.101577665488508
2008052	4	0.0435753374992174	0.095705734862129
2008052	5	0.0569469251993615	0.126823059854162
2008052	6	0.066096410144107	0.168242626264866
2008052	7	0.0666446226968164	0.241446767897463
2008052	8	0.0763106546179577	0.328770950442141
2008052	9	0.0908845022822495	0.359276132733838
2008052	10	0.116935045950833	0.376832819051869
2008052	11	0.116265707425822	0.306583540474673
2008052	12	0.107062107697887	0.266091252258649
2008052	13	0.10223065755886	0.230537266916852
2008052	14	0.102705899185707	0.2663478737921
2008052	15	0.104539401734706	0.337964881549457
2008052	16	0.0954417351825311	0.330490575803455
2008052	17	0.0799347704152604	0.254877859945246
2008052	18	0.0637892383612033	0.207184990192905
2008052	19	0.0570098431940836	0.277274275438148
2008052	20	0.0673489257994025	0.356011933757852
2008052	21	0.0824875680243104	0.396698152638846
2008052	22	0.0934044855211428	0.43596814088201
2008052	23	0.107648056740236	0.515192495931952
2008053	0	0.13755747783905	0.643332695446905
2008053	1	0.177838290208023	0.861866370967512
2008053	2	0.22175869562523	1.17327203152681
2008053	3	0.263586376924364	1.40630459666181
2008053	4	0.272802403111184	1.31127719536133
2008053	5	0.28698927834833	1.34476879764385
2008053	6	0.302106052731814	1.39319988023346
2008053	7	0.312082095949655	1.3810052126283
2008053	8	0.323221648211736	1.62078111802208
2008053	9	0.312444059931671	1.60708610056285
2008053	10	0.299624177346517	1.4565977088083
2008053	11	0.28936009014527	1.28089731234905
2008053	12	0.29434041639058	1.18605648778377
2008053	13	0.30739072756807	1.12642450552641
2008053	14	0.307906656819588	1.0290107253486
2008053	15	0.297697227288159	1.06064697558291
2008053	16	0.277071409936367	1.01537580024724
2008053	17	0.222648750394011	1.04925741586152
2008053	18	0.140165301044607	0.537738156002296
2008053	19	0.0729967439642432	0.240258262119668
2008053	20	0.03855172362412	0.137753850032292
2008053	21	0.00821017452204291	0.0319946425414724
2008053	22	0.0120186943849913	0.074378121530028
2008053	23	0.31625196565768	2.79858186227509
2008054	0	0.433619858154362	5.04331694696947
2008054	1	0.546987638198621	6.86281935024946
2008054	2	0.557339251006099	7.06506730772245
2008054	3	0.5074311579931	6.38337689932685
2008054	4	0.447019674394426	5.24173211415373
2008054	5	0.393336245038924	4.81411026310583
2008054	6	0.416131772849742	3.83717016121448
2008054	7	0.404769030036088	1.96941778724349
2008054	8	0.468528107717826	4.8897667227272
2008054	9	0.489300307251716	4.43811426563971
2008054	10	0.514947043554517	4.31600931878382
2008054	11	0.499972277194585	4.16444627042445
2008054	12	0.42592765396704	3.32136386426423
2008054	13	0.356885472675751	2.56086174144183
2008054	14	0.34210790761827	1.91389938707592
2008054	15	0.352183781545323	1.55932987621031
2008054	16	0.370605221501949	1.29943660266693
2008054	17	0.363549207333248	1.01191827509268
2008054	18	0.321022610754329	0.803918321535678
2008054	19	0.217658203621169	0.429405066129192
2008054	20	0.134384391886388	0.245303685530454
2008054	21	0.116510368055	0.215805064153526
2008054	22	0.112123349643828	0.239582329042959
2008054	23	0.120871337954514	0.336201975381687
2008055	0	0.157875878654649	0.361688357302524
2008055	1	0.181876804700237	0.323335453883609
2008055	2	0.194505771654325	0.352005488176013
2008055	3	0.200108729076734	0.372540319347838
2008055	4	0.192611418647238	0.375506287234967
2008055	5	0.180789617195684	0.396271773587984
2008055	6	0.150289122579382	0.326598954403303
2008055	7	0.12058932216846	0.233912087644485
2008055	8	0.09744913825436	0.181617190543191
2008055	9	0.0817144279604701	0.154480095224289
2008055	10	0.0831151894890266	0.149843389868474
2008055	11	0.0847434840176437	0.14248952016025
2008055	12	0.078204749015381	0.141328218801914
2008055	13	0.069791779208509	0.134327899990628
2008055	14	0.0657616536738995	0.123217836788829
2008055	15	0.0589386155594378	0.101839171537097
2008055	16	0.0560553576282223	0.0865924816848986
2008055	17	0.0563503930560188	0.0829774776604762
2008055	18	0.0765172602714906	0.106323567896584
2008055	19	0.104306618366086	0.132013061181626
2008055	20	0.10099933969882	0.123914608980458
2008055	21	0.0842484596062493	0.104481762707685
2008055	22	0.0508409873956515	0.0635893030030959
2008055	23	0.0395578117557323	0.0518650373891496
2008056	0	0.0331073110921378	0.0456425261860448
2008056	1	0.0275291304621816	0.0434416797962026
2008056	2	0.0271371436957919	0.0500827413344461
2008056	3	0.024779760198736	0.0470541101560042
2008056	4	0.0242253894490908	0.0667151749926309
2008056	5	0.0161243195176764	0.0414185230340475
2008056	6	0.021506806026194	0.0702233864263015
2008056	7	0.0739420164039214	0.308603079284845
2008056	8	0.170691383777675	0.462765250109453
2008056	9	0.277919864821859	0.68441657850712
2008056	10	0.350850747112397	1.11085668188835
2008056	11	0.354711191331071	1.39500684969136
2008056	12	0.317865198738693	1.19738880011525
2008056	13	0.297723272779507	0.93307909113347
2008056	14	0.281277483876726	0.738749450586853
2008056	15	0.269179939967606	0.610921649999004
2008056	16	0.270403747998628	0.496870130309719
2008056	17	0.242935381011919	0.326228030273925
2008056	18	0.233106085163689	0.298633523917843
2008056	19	0.216747840398071	0.286131701731132
2008056	20	0.166898784494517	0.235185383003897
2008056	21	0.0692762912431136	0.11927943357287
2008056	22	0.0276516882963936	0.0730269143829287
2008056	23	0.0252580084840996	0.0999081295962612
2008057	0	0.0430423893028608	0.197663220984087
2008057	1	0.0576804817067131	0.241640613518572
2008057	2	0.0597223422943635	0.231622347615309
2008057	3	0.0680644033836436	0.226837286850584
2008057	4	0.067629659412055	0.153623710101307
2008057	5	0.042911916407439	0.0846237182267809
2008057	6	0.0366996991083452	0.0809694440094754
2008057	7	0.0372370623528311	0.0867759894747619
2008057	8	0.0364005052834901	0.0817932404797035
2008057	9	0.0318863269206272	0.0717084394964278
2008057	10	0.0246730975040407	0.0528877032551996
2008057	11	0.0131719118851511	0.0279342588828577
2008057	12	0.00676962768587202	0.0140308554384294
2008057	13	0.0043742665396981	0.0130768574147915
2008057	14	0.00332033915848573	0.0186092288306887
2008057	15	0.00253252775875616	0.0159999624941711
2008057	16	0.0024949685457396	0.00653197832815259
2008057	17	0.0192282987523986	0.0807860124004628
2008057	18	0.0775485189559358	0.553334915265817
2008057	19	0.134496728659282	0.947768039708231
2008057	20	0.166546670403378	0.908402165176569
2008057	21	0.21246750279263	0.958284130540189
2008057	22	0.23009404597564	1.15303888541644
2008057	23	0.2619246379366	1.59562675360461
2008058	0	0.369595980797255	2.403545052682
2008058	1	0.38123557777101	1.70547140220574
2008058	2	0.384829858872625	1.80897808764837
2008058	3	0.434860934165035	2.66802817284942
2008058	4	0.516891770589619	3.47841529708178
2008058	5	0.394856649262443	2.41171897405847
2008058	6	0.278832358724985	1.85395224385081
2008058	7	0.317764219262842	2.49608259649185
2008058	8	0.367965804792152	3.0240272721008
2008058	9	0.403907496627813	3.44665404159164
2008058	10	0.451061169962441	3.96027575815292
2008058	11	0.463184241356	3.88356671076367
2008058	12	0.439817403746152	5.02024605731947
2008058	13	0.344600847659973	3.69423488354748
2008058	14	0.334863036752178	3.24516808315053
2008058	15	0.371211724297055	3.11299914436248
2008058	16	0.36631518375444	2.50560404023324
2008058	17	0.330137761129294	1.81207194884462
2008058	18	0.266438254429585	1.44300517970812
2008058	19	0.155598351470329	0.981092726153762
2008058	20	0.249554284911813	2.95261347017356
2008058	21	0.46161857084651	5.0794597335076
2008058	22	0.534617390801144	5.82779967242649
2008058	23	0.540700703548911	5.64482608678151
2008059	0	0.53965008299548	5.50875175274195
2008059	1	0.55465862462909	6.24556330796643
2008059	2	0.575359810991038	6.40145535464291
2008059	3	0.549987213901343	5.11389293959591
2008059	4	0.504472914485035	3.71296427055211
2008059	5	0.446684088932096	2.33124568870387
2008059	6	0.406827943848657	1.76547781328717
2008059	7	0.415210695530335	1.64178908710854
2008059	8	0.417369171358476	1.84479014085852
2008059	9	0.414752602403118	1.94295404210194
2008059	10	0.396125068085682	2.06671437977928
2008059	11	0.390227303962031	2.40699489633058
2008059	12	0.386114817820158	2.26621005731004
2008059	13	0.357679372308942	2.1071080033046
2008059	14	0.325064871893532	1.83268439511066
2008059	15	0.301434577981845	1.49518858444275
2008059	16	0.286608424504341	1.05934342538481
2008059	17	0.268790326826623	0.718534583312577
2008059	18	0.243300911750087	0.45772647713024
2008059	19	0.215930983889211	0.319152861310691
2008059	20	0.193558047945834	0.275056391776878
2008059	21	0.166782869079937	0.255299019824938
2008059	22	0.137778560306643	0.270860404438706
2008059	23	0.135545421753818	0.326318709881454
2008060	0	0.159775159366896	0.406100714036191
2008060	1	0.180335418781523	0.46304568192704
2008060	2	0.17321735273764	0.398272982300491
2008060	3	0.157224794535458	0.295564453247886
2008060	4	0.138435866954669	0.248267958971367
2008060	5	0.127151302158242	0.229745247317809
2008060	6	0.118989701705567	0.220961397911149
2008060	7	0.113384596432908	0.22872436857953
2008060	8	0.136593865818831	0.388311310106625
2008060	9	0.146454669310401	0.452867231632488
2008060	10	0.142871398521679	0.432288519567643
2008060	11	0.14282640425277	0.504035260847849
2008060	12	0.145515165164447	0.62127705105829
2008060	13	0.138709760623137	0.585095261090789
2008060	14	0.119023443226926	0.400132098586608
2008060	15	0.0995091699862956	0.244665461624488
2008060	16	0.0890415911546972	0.197431476109283
2008060	17	0.087378946874944	0.159767263355191
2008060	18	0.0984396402323286	0.157896156075384
2008060	19	0.0921886654975804	0.147519994679751
2008060	20	0.0886765074909276	0.125908436641123
2008060	21	0.0678682912546796	0.0908398942631323
2008060	22	0.0200624744997468	0.0268070361070223
2008060	23	0.00929521781173284	0.0401366328400843
