# Supplementary material for: A comparison of sea salt emission parameterizations in northwestern Europe using a chemistry transport model setup
Source: Copernicus journal article supplement (doi:10.5194/acp-16-9905-2016), 2016-08-08
Supplement: Supplementary file 2 [file acp-16-9905-2016-supplement.zip › conc/conc.timeseries.values.win2008.sp13.Na.DE0044R.csv]

doy	hour	pm2.5	pm10
2008001	0	0.249021975345451	0.61126952096308
2008001	1	0.24715573236563	0.655788768902476
2008001	2	0.235884701696304	0.593983663732557
2008001	3	0.218643820270927	0.544424803518463
2008001	4	0.202210181694128	0.540875280061797
2008001	5	0.184735193705462	0.510341669849834
2008001	6	0.170932750404528	0.501166154671458
2008001	7	0.167589606800678	0.500222487689441
2008001	8	0.163210297485774	0.491111747672483
2008001	9	0.171035040535956	0.54602726086552
2008001	10	0.197708075587068	0.660535264140877
2008001	11	0.213980850276369	0.606748973102276
2008001	12	0.240901700785241	0.57300799005833
2008001	13	0.260579794846814	0.632970059977017
2008001	14	0.290240461510256	0.83097660107301
2008001	15	0.299045228973146	0.825003195954054
2008001	16	0.289524405431631	0.680034375006269
2008001	17	0.279471817941077	0.586208416713728
2008001	18	0.276033091941277	0.543280976435218
2008001	19	0.265671602313418	0.475497620315466
2008001	20	0.255637269046342	0.453520952944429
2008001	21	0.244914642461326	0.425414807446381
2008001	22	0.230943209269532	0.395151815553836
2008001	23	0.21166976943326	0.36361591754473
2008002	0	0.19737039263893	0.337950574831294
2008002	1	0.183349298137364	0.311558266003721
2008002	2	0.174680967781085	0.285818620372519
2008002	3	0.170454732652331	0.258067070269243
2008002	4	0.163840030211155	0.229068093981449
2008002	5	0.157609376227991	0.212992619408838
2008002	6	0.152541363578176	0.208974748481396
2008002	7	0.152319513529349	0.206359039073758
2008002	8	0.152951197078807	0.204769586037524
2008002	9	0.161354398276387	0.212405226075669
2008002	10	0.181453099593074	0.230325133787258
2008002	11	0.189693913091089	0.247825472442102
2008002	12	0.172519559423317	0.2655571514364
2008002	13	0.10831991825172	0.25567103364281
2008002	14	0.0621217816504078	0.225529517332112
2008002	15	0.04822776053436	0.132269310246939
2008002	16	0.0219928854558816	0.0371922739360916
2008002	17	0.0153253492443237	0.0225840961997528
2008002	18	0.0157602746078813	0.0277943523670036
2008002	19	0.016664945160269	0.0325614984301562
2008002	20	0.0138458214044992	0.0246785610905813
2008002	21	0.0102539709153926	0.0178611904853969
2008002	22	0.00831819621318972	0.0147946162513765
2008002	23	0.00717314836957766	0.0137008069806523
2008003	0	0.00688023767100208	0.0135063725832365
2008003	1	0.00727546791180396	0.0133351802736646
2008003	2	0.00596643956019274	0.00989874563170706
2008003	3	0.00444196347701064	0.00772384665718071
2008003	4	0.00515064203084222	0.0103058343013026
2008003	5	0.00903264877214825	0.0233907081935437
2008003	6	0.0116129500562587	0.0304692286468437
2008003	7	0.0116383408070467	0.0321569112412318
2008003	8	0.0141458254322479	0.044040422989836
2008003	9	0.0212317936080874	0.067740416459861
2008003	10	0.0315507608844297	0.0857306756158721
2008003	11	0.037088131035704	0.086268433018896
2008003	12	0.0422918001165856	0.0831962378046873
2008003	13	0.0429126747695862	0.074385869136238
2008003	14	0.0429110457481181	0.0705521989190858
2008003	15	0.0449880558695605	0.0730217762258111
2008003	16	0.0416132714625833	0.0720273104086302
2008003	17	0.0366576787635831	0.075905521045242
2008003	18	0.0411808256483806	0.0892733253815664
2008003	19	0.0472794205109816	0.101522939355938
2008003	20	0.0485619984139117	0.102429777638254
2008003	21	0.0475528893528938	0.0994940591574605
2008003	22	0.0461599004866913	0.0976599131021773
2008003	23	0.0459454050448461	0.0963809200463331
2008004	0	0.0465240930632368	0.0959150226701804
2008004	1	0.0467485834424695	0.0956566397767984
2008004	2	0.0475339348948408	0.0983272387818316
2008004	3	0.0488135591035686	0.102286012570231
2008004	4	0.049640238626155	0.10312161319013
2008004	5	0.0496186420316785	0.0987734520863363
2008004	6	0.0482411046938693	0.0860494222750117
2008004	7	0.0467196369393213	0.0781258461122953
2008004	8	0.0452058164278696	0.075620881473871
2008004	9	0.0535705562176622	0.10257528844311
2008004	10	0.0558029714885119	0.103465260044483
2008004	11	0.056404828442191	0.101283380364874
2008004	12	0.0557253235959362	0.0970789831483395
2008004	13	0.0533371842264898	0.0899719501816809
2008004	14	0.0521482725397609	0.0896952948217762
2008004	15	0.051103649355309	0.0861564738746705
2008004	16	0.0483331969393945	0.0736380164281262
2008004	17	0.0453582598870499	0.0629929583932796
2008004	18	0.0452284913846424	0.0620710832183984
2008004	19	0.0454564079553344	0.0616054897020865
2008004	20	0.0441844489782888	0.0575029690793543
2008004	21	0.0418632024429656	0.0525957390425639
2008004	22	0.0409803150420974	0.0514079888462121
2008004	23	0.0424154847952681	0.0542134658892437
2008005	0	0.0446988074731851	0.057728027876652
2008005	1	0.0445670156735839	0.0619811987803127
2008005	2	0.0577893309053579	0.116691201532754
2008005	3	0.0705291662962019	0.144966731925241
2008005	4	0.0828357273776104	0.149464782631588
2008005	5	0.0890646203785743	0.147415999485694
2008005	6	0.0940126059561742	0.146855487492281
2008005	7	0.0945042239945547	0.145359979062989
2008005	8	0.0976303482013281	0.151144449289752
2008005	9	0.1007854277088	0.150815122883395
2008005	10	0.0986535703893407	0.136438049987824
2008005	11	0.095242322150536	0.130929452918912
2008005	12	0.0950291627749482	0.138224674874925
2008005	13	0.0923728486742465	0.134418725291645
2008005	14	0.0924469105152893	0.141766315696818
2008005	15	0.0955374940743783	0.169447488557037
2008005	16	0.0998645351154955	0.224639813350249
2008005	17	0.0832047197016002	0.176991425365648
2008005	18	0.0600762119248997	0.104693963946868
2008005	19	0.0493676050680072	0.0715955752415597
2008005	20	0.0435795127573052	0.0635073403905909
2008005	21	0.0389571701946979	0.0624020546523233
2008005	22	0.0367365783863802	0.0631709192192156
2008005	23	0.0359809386854572	0.0630188178909435
2008006	0	0.0356711900805431	0.0638519073376027
2008006	1	0.0370188912714465	0.0696682634947921
2008006	2	0.0419505128127473	0.0779228030231191
2008006	3	0.0480505544926113	0.0836143691641105
2008006	4	0.054025783010755	0.0913869894786504
2008006	5	0.0598646836362725	0.101478213405795
2008006	6	0.063386846436647	0.115383382101781
2008006	7	0.0615955224450458	0.130938205713863
2008006	8	0.0634983033374009	0.150166557109179
2008006	9	0.062481685280111	0.150639795819884
2008006	10	0.0563837714607002	0.134634356353477
2008006	11	0.0479020304117537	0.104875474953189
2008006	12	0.0383803127610363	0.0750559407491519
2008006	13	0.0314555162856437	0.0588931661631698
2008006	14	0.0314047581910387	0.062037078826698
2008006	15	0.0321584246571944	0.0719852559494532
2008006	16	0.0257039983908637	0.0650651990539093
2008006	17	0.0190763478422705	0.0518014262620347
2008006	18	0.0192645070164006	0.0678477532948608
2008006	19	0.0345949640647975	0.145806377814522
2008006	20	0.0549522014126032	0.233681039014143
2008006	21	0.0642525229450867	0.261572603592573
2008006	22	0.0654189831087263	0.261400779070106
2008006	23	0.0592393257203305	0.244630667101075
2008007	0	0.0578467668027083	0.236509529799344
2008007	1	0.0606795943087134	0.237738516233806
2008007	2	0.0663298621565718	0.243503060272435
2008007	3	0.0777478748602746	0.246542523920927
2008007	4	0.087438613259884	0.2377551812271
2008007	5	0.0932731730198285	0.248970487469889
2008007	6	0.106486655783306	0.310490757670122
2008007	7	0.129884322780111	0.442723889530482
2008007	8	0.141653117148889	0.421315644727068
2008007	9	0.154665978194943	0.809874914982039
2008007	10	0.145615486358369	0.779455788112378
2008007	11	0.111356611504833	0.462935470133709
2008007	12	0.0301867314208186	0.0737934979128331
2008007	13	0.0288368535402996	0.338105474210339
2008007	14	0.183765440016227	1.78276646844469
2008007	15	0.205118153436375	1.5489569901382
2008007	16	0.141575783593831	0.775121435867518
2008007	17	0.16886513853782	0.759646166261434
2008007	18	0.253998359363151	1.37040494678095
2008007	19	0.25679791386629	1.50546896068086
2008007	20	0.250404222741159	1.34263396297942
2008007	21	0.265448908448822	1.34581115872172
2008007	22	0.251952143687056	1.22382093509532
2008007	23	0.246915250169155	1.04121983192467
2008008	0	0.246305912113948	0.801143782675978
2008008	1	0.199879520455213	0.592828301568498
2008008	2	0.10320448242634	0.810756543619504
2008008	3	0.107360919722365	0.991594618626797
2008008	4	0.0729685566927599	0.497613704801238
2008008	5	0.0810008405099733	0.504029408487234
2008008	6	0.154950873670128	0.939974444307604
2008008	7	0.186765678943733	1.06202633517321
2008008	8	0.187116516075299	0.901315928428967
2008008	9	0.188981222071528	0.759232794290172
2008008	10	0.207535213702985	0.716938531223804
2008008	11	0.223254207053256	0.516342765603176
2008008	12	0.2223433058936	0.406907928042137
2008008	13	0.218493520833803	0.555661422616541
2008008	14	0.215626065880114	0.58791367038414
2008008	15	0.191680315112537	0.464295572049791
2008008	16	0.185748765537147	0.400912700983039
2008008	17	0.20325582921337	0.450594279371106
2008008	18	0.188458469334315	0.420274405690696
2008008	19	0.154553238883186	0.251078422361656
2008008	20	0.135591091405755	0.193197880068428
2008008	21	0.125617874010596	0.173687968716585
2008008	22	0.123669342947918	0.173434970240349
2008008	23	0.134780730494557	0.210474862062038
2008009	0	0.150942465704266	0.259472697192657
2008009	1	0.15425824757527	0.280057065617454
2008009	2	0.142937501967729	0.26757139928034
2008009	3	0.127940675617566	0.245193876658272
2008009	4	0.114947991537541	0.215978163442849
2008009	5	0.11531328580873	0.302245745336341
2008009	6	0.156851891598501	0.477220535895366
2008009	7	0.172951307433192	0.495665870428631
2008009	8	0.126618825453839	0.28590136919487
2008009	9	0.10376962419505	0.193471154261651
2008009	10	0.0977093695970186	0.156128640508204
2008009	11	0.0983493449732188	0.149264048534853
2008009	12	0.094969696557196	0.150120193866299
2008009	13	0.0927238906479515	0.158533721862681
2008009	14	0.0921924391587864	0.154920263269629
2008009	15	0.0884230998434272	0.13276233741203
2008009	16	0.0755493439345289	0.0979890611050857
2008009	17	0.0674055598690304	0.083316326543673
2008009	18	0.0616886827275577	0.077128713157719
2008009	19	0.0535093559057703	0.0671722704938176
2008009	20	0.0444376596230426	0.0549408068072178
2008009	21	0.0368359759392887	0.0466137636554744
2008009	22	0.0310291390675727	0.0409839368987676
2008009	23	0.0285689507189182	0.0393252685565397
2008010	0	0.0272200237639618	0.038697813275822
2008010	1	0.026838005617866	0.0384849781968337
2008010	2	0.0263508937782501	0.0387914249592988
2008010	3	0.0251599783007255	0.0387357470616361
2008010	4	0.0239577162631949	0.0364958662286699
2008010	5	0.0204666938522705	0.0327677005100111
2008010	6	0.0170238829330138	0.03282788427925
2008010	7	0.0176311319929418	0.0521934629625422
2008010	8	0.0229112110293025	0.0933925858544257
2008010	9	0.0274776066373627	0.106733429944009
2008010	10	0.0360078542049509	0.144501998860524
2008010	11	0.0245122236383674	0.0467936731940614
2008010	12	0.0221589188290415	0.0349823105707332
2008010	13	0.0253354343453277	0.0360279052236994
2008010	14	0.0282563437083963	0.0430265017437955
2008010	15	0.0298897086489449	0.0549504950531916
2008010	16	0.0360656122317144	0.0715540548350315
2008010	17	0.0381450281711112	0.0705049803590577
2008010	18	0.0379250249761424	0.0611944539101101
2008010	19	0.0376638400935178	0.0553373131675716
2008010	20	0.0360668124944582	0.0486007870428816
2008010	21	0.0315720907186172	0.0403814781290008
2008010	22	0.0282126980775545	0.0357909840048394
2008010	23	0.0274121366899596	0.0376463766837667
2008011	0	0.0309645585391932	0.0606512183550957
2008011	1	0.0322710274222974	0.0749916049680234
2008011	2	0.0313350403592807	0.0762757315059011
2008011	3	0.0295582920335416	0.0668954247912931
2008011	4	0.0280902484807592	0.060091370420608
2008011	5	0.0268527208839939	0.0564653251244199
2008011	6	0.025131856056905	0.050621651122542
2008011	7	0.0242467997954353	0.0469079803250639
2008011	8	0.0242296995708787	0.0453417739492077
2008011	9	0.0242472932027515	0.0429023838732728
2008011	10	0.0229574992679378	0.0357126024164306
2008011	11	0.0223960752437209	0.0303778969474212
2008011	12	0.0218618853976354	0.0277294257522174
2008011	13	0.0217836462337888	0.0273787676218697
2008011	14	0.0221368254125488	0.0290378960075086
2008011	15	0.0216672761091989	0.0292650280550374
2008011	16	0.0217066279049075	0.0294397675108491
2008011	17	0.0247699133417505	0.0332841853483733
2008011	18	0.0260030533700332	0.0370877072622302
2008011	19	0.0284816918283986	0.0483471709249152
2008011	20	0.0392433197080413	0.0938964828368712
2008011	21	0.0393073054674526	0.0870330148417179
2008011	22	0.0351487084639706	0.067915724579351
2008011	23	0.0295560249743875	0.0567126309591963
2008012	0	0.0257535536532611	0.0479132854897
2008012	1	0.0263140518733829	0.0431496023952086
2008012	2	0.0279577471020403	0.0408760855144796
2008012	3	0.0318300824515978	0.0552270425353943
2008012	4	0.0326715571258228	0.059719735125125
2008012	5	0.0314884246067208	0.0571771782151258
2008012	6	0.029451073637838	0.054891559465518
2008012	7	0.0257671345626257	0.0478908490865612
2008012	8	0.0217171158220066	0.0386660201296858
2008012	9	0.0211613762741241	0.0429695163982548
2008012	10	0.0588947717555893	0.135212158284768
2008012	11	0.121283987308031	0.245782499181421
2008012	12	0.158241754877749	0.377001525090202
2008012	13	0.19056918095178	0.487315333784819
2008012	14	0.189652463891846	0.430755463150544
2008012	15	0.168640357304268	0.336710144843152
2008012	16	0.158202904348269	0.288891126742458
2008012	17	0.154807295049198	0.272160417350584
2008012	18	0.150354320773576	0.26994878159986
2008012	19	0.14459294301939	0.266295772152415
2008012	20	0.145546364423262	0.250703220467434
2008012	21	0.148551207866543	0.241832705848391
2008012	22	0.146998809739382	0.230720357853389
2008012	23	0.141335268888139	0.203341945585508
2008013	0	0.140180858412776	0.200193511194274
2008013	1	0.136713593496607	0.201238363057879
2008013	2	0.134688732269665	0.201462989222391
2008013	3	0.131968409741994	0.202724818000056
2008013	4	0.130441723283457	0.217928768028123
2008013	5	0.12773074604727	0.219030981368239
2008013	6	0.126706993936082	0.224392234252397
2008013	7	0.123446934731982	0.215805422839139
2008013	8	0.12127594241305	0.207111212366883
2008013	9	0.120718068387241	0.199556161865011
2008013	10	0.119228482861548	0.195711207775896
2008013	11	0.116045969632548	0.182913447900201
2008013	12	0.120682257132035	0.239218887740811
2008013	13	0.118129885904304	0.217977809479654
2008013	14	0.119704614408984	0.218614330445145
2008013	15	0.123753041461834	0.231480274219388
2008013	16	0.128958744633093	0.242034702920995
2008013	17	0.130760166862493	0.240158644936639
2008013	18	0.12880533993914	0.22349873876258
2008013	19	0.126622047052526	0.214909270983913
2008013	20	0.128595533032907	0.216839651835271
2008013	21	0.127706539942513	0.216681761379217
2008013	22	0.116170302337831	0.192789808748893
2008013	23	0.0911514987993565	0.156570960306589
2008014	0	0.0735065684868593	0.125929553171698
2008014	1	0.061863004763889	0.10720043200915
2008014	2	0.0548747227665717	0.101355072813433
2008014	3	0.0520934906691637	0.103709089705461
2008014	4	0.0508319834624674	0.105868459847764
2008014	5	0.0526584746135007	0.10830775621683
2008014	6	0.052690975383251	0.106440118115025
2008014	7	0.0515048954668324	0.0955420174648166
2008014	8	0.0516692108213126	0.0824537520291882
2008014	9	0.0536768269467282	0.0770082137162261
2008014	10	0.0807361620299333	0.142581476272504
2008014	11	0.0898366049785024	0.134800260531584
2008014	12	0.0875946942094376	0.126301209921021
2008014	13	0.088148655709004	0.132143892528578
2008014	14	0.0907210986847159	0.138831059011116
2008014	15	0.0912030826393707	0.142797162605012
2008014	16	0.0875436078911152	0.135585911318603
2008014	17	0.0810635208009997	0.123262825073436
2008014	18	0.0758141726152549	0.112045795250604
2008014	19	0.0746401477075796	0.106882723508034
2008014	20	0.0760806828967947	0.109167846875815
2008014	21	0.0777725891684891	0.122830556217396
2008014	22	0.075332357031957	0.126324197729812
2008014	23	0.0703474133758105	0.130558627304878
2008015	0	0.0663539092759389	0.14510560015924
2008015	1	0.0598353169254856	0.135031334470716
2008015	2	0.0520864052685159	0.112345876140634
2008015	3	0.0505251557634316	0.101727746217751
2008015	4	0.0546550964207992	0.104159251810711
2008015	5	0.0596995032007197	0.0984395789661618
2008015	6	0.0637051297228685	0.088337991757721
2008015	7	0.0643464551762145	0.0838693480513462
2008015	8	0.0623196594024125	0.0796284448905763
2008015	9	0.0604899317484283	0.0850423359378942
2008015	10	0.0593479372516097	0.100199034418283
2008015	11	0.0587236295323914	0.10557431776878
2008015	12	0.0601812314484881	0.128173098512834
2008015	13	0.0608130090016497	0.156482210065155
2008015	14	0.0643511682964762	0.192013698794787
2008015	15	0.0658523394560124	0.199733942293465
2008015	16	0.0566522304666789	0.147894397133114
2008015	17	0.0482444539860934	0.109316362029786
2008015	18	0.0486753198717854	0.118284722997568
2008015	19	0.0505440415822621	0.156755692862483
2008015	20	0.0447197847949107	0.146904513925269
2008015	21	0.0397912079230229	0.132305867442225
2008015	22	0.0412402319421609	0.131196080789864
2008015	23	0.0511455506411861	0.155955357884933
2008016	0	0.0543739605336154	0.140555861852089
2008016	1	0.0548809959197494	0.131786245277624
2008016	2	0.0537105834778878	0.113872378006726
2008016	3	0.0507412734832125	0.104627711741276
2008016	4	0.0440865623962369	0.090078424951835
2008016	5	0.034549444737856	0.0626167109140024
2008016	6	0.0193895329408358	0.0304870086747762
2008016	7	0.00961703880103905	0.0166545448581183
2008016	8	0.00858744742364635	0.0153426394849644
2008016	9	0.00857046415671509	0.0150777486437889
2008016	10	0.00765743290333723	0.0132747218172694
2008016	11	0.00743539270488254	0.0209179986737275
2008016	12	0.00874236753365819	0.041016840939463
2008016	13	0.0224282674591886	0.148070959494173
2008016	14	0.0450409497835841	0.244297743000072
2008016	15	0.0645159563323748	0.282912889139378
2008016	16	0.0746415138748981	0.247794391133852
2008016	17	0.0748554261037973	0.197704919628823
2008016	18	0.065902525748115	0.144912471833857
2008016	19	0.050028479236544	0.0959190676596695
2008016	20	0.0340910049195237	0.0623443633046892
2008016	21	0.0300948204142511	0.0531047392713696
2008016	22	0.0299987635215566	0.0528436695500504
2008016	23	0.02871186331025	0.0495218151879458
2008017	0	0.0269220793661797	0.0448557643683888
2008017	1	0.0261310381429351	0.0465066381520236
2008017	2	0.0250901118029841	0.0559916243175924
2008017	3	0.0241412276753869	0.0685875097748223
2008017	4	0.0229694650152714	0.0699891872839464
2008017	5	0.021419374844645	0.0651966333247343
2008017	6	0.0199203520237618	0.0623986114361845
2008017	7	0.0197774204906189	0.0638540043862127
2008017	8	0.019874062018068	0.0644507966094272
2008017	9	0.0227318048035842	0.0722760725737754
2008017	10	0.0248495104395474	0.0644560525610174
2008017	11	0.0246683567419387	0.0496757719315281
2008017	12	0.0215184119885463	0.0371448616400267
2008017	13	0.018513044687013	0.0331458459501041
2008017	14	0.0282568337944468	0.0579832286695193
2008017	15	0.0707218460186967	0.138488703160592
2008017	16	0.090688356444345	0.190326971003622
2008017	17	0.0888892166958508	0.163961060981596
2008017	18	0.0858963162912231	0.131399819163297
2008017	19	0.0809477363134292	0.105111261033511
2008017	20	0.0590848588226733	0.0750261952376806
2008017	21	0.049947291854543	0.103101609271929
2008017	22	0.101223706839355	0.196062299718006
2008017	23	0.101584806168657	0.27475117677996
2008018	0	0.139536509335107	0.268330527733688
2008018	1	0.15155960881755	0.22184556463404
2008018	2	0.0971771809635917	0.140046689451052
2008018	3	0.0542949738150778	0.076020459437048
2008018	4	0.0249032627522819	0.0359625951344383
2008018	5	0.0183394353659379	0.088687467852113
2008018	6	0.0570274053731388	0.402824823520367
2008018	7	0.0970250136782036	0.52693937852045
2008018	8	0.114800169137148	0.479360057629932
2008018	9	0.111164931650683	0.299455375648139
2008018	10	0.0815108064195019	0.210469914748133
2008018	11	0.153859475324263	0.764625977590026
2008018	12	0.17774561353959	0.847112795450071
2008018	13	0.126128008086391	0.425846756971074
2008018	14	0.0734248077400516	0.262202751741971
2008018	15	0.0855135406687091	0.426595981417097
2008018	16	0.132555294047566	0.520460196451721
2008018	17	0.153757606332644	0.470116171119967
2008018	18	0.15935151531197	0.373877692288532
2008018	19	0.164601587513171	0.361743378004004
2008018	20	0.165815320084016	0.307577889841219
2008018	21	0.172684150859839	0.275238998171173
2008018	22	0.38631410845693	0.821260547626394
2008018	23	0.545864720696307	1.28884870254987
2008019	0	0.466987525471496	0.769684737929852
2008019	1	0.322739548497234	0.64770115120327
2008019	2	0.379698713743775	1.02094034784978
2008019	3	0.462818533518113	1.60169003314998
2008019	4	0.512506270544928	2.12277687103638
2008019	5	0.466813027931641	1.94261228609833
2008019	6	0.384626575714416	1.48031453502424
2008019	7	0.310939582876125	1.28099958329824
2008019	8	0.244817277332839	1.02260846553349
2008019	9	0.148019237311416	0.600254748463001
2008019	10	0.0787447821022859	0.300382294078795
2008019	11	0.0496725263202104	0.187069751157257
2008019	12	0.0357056678705273	0.128042712435665
2008019	13	0.0212968838899219	0.0729430752164407
2008019	14	0.0102008083773505	0.0368239467686799
2008019	15	0.00254152179027171	0.00833526185714348
2008019	16	0.0031252032174418	0.0152455780922249
2008019	17	0.0309374701811	0.132926225398961
2008019	18	0.109634928702366	0.463297919979495
2008019	19	0.200392544758229	0.800560575119286
2008019	20	0.278579200159818	1.0324753422068
2008019	21	0.31908388269659	1.12134633741926
2008019	22	0.318685984747778	1.09035224816912
2008019	23	0.310730964203142	1.03822430123668
2008020	0	0.294617142831509	0.976393146191461
2008020	1	0.282181724773659	0.872131768059412
2008020	2	0.269041094797123	0.677963845371203
2008020	3	0.261995256746714	0.624963409960112
2008020	4	0.255565092176533	0.596570252347788
2008020	5	0.247508681289061	0.540981589042456
2008020	6	0.142224394183423	0.287391367991283
2008020	7	0.093952023159746	0.217008632684885
2008020	8	0.10959436057752	0.194013815851554
2008020	9	0.0161401315598993	0.0284574002661884
2008020	10	0.00669054057546073	0.00998113458928685
2008020	11	0.0330102899358992	0.0697397611484065
2008020	12	0.084702172841668	0.144662697845242
2008020	13	0.086388535055324	0.180960479153076
2008020	14	0.0843175276166948	0.18264845290126
2008020	15	0.0496045368787332	0.128319072432507
2008020	16	0.0346920588867034	0.119497912826742
2008020	17	0.0426140473732418	0.168469464340529
2008020	18	0.0451645044800003	0.180675483519814
2008020	19	0.0355603603082669	0.129658414358421
2008020	20	0.0228202510099653	0.0786360630425951
2008020	21	0.014635500010973	0.0430652196358252
2008020	22	0.00861195379941236	0.0188600155130413
2008020	23	0.00557014485903778	0.009609414664187
2008021	0	0.00344004876923741	0.00629457979081016
2008021	1	0.00735410797409686	0.0196367203114949
2008021	2	0.0439368599802423	0.134530635505028
2008021	3	0.0263075475720205	0.0771757247484537
2008021	4	0.0218128712911426	0.0692816260273591
2008021	5	0.0151110971121292	0.0436427844536535
2008021	6	0.00609395716740704	0.0175908212323939
2008021	7	0.00658441777499315	0.0325148104781498
2008021	8	0.0123864668832577	0.0509858906316689
2008021	9	0.0728886932509996	0.277119760816454
2008021	10	0.0904260115408872	0.313586398484988
2008021	11	0.100965124528022	0.471745487448552
2008021	12	0.092514735403875	0.403306248694316
2008021	13	0.058657131900101	0.197506712147718
2008021	14	0.0519204733407345	0.151240041017122
2008021	15	0.0405504819509379	0.128359175564411
2008021	16	0.0359008731168506	0.0989381215131001
2008021	17	0.0221387701657347	0.0676568601675124
2008021	18	0.0146351995143756	0.0412237284012533
2008021	19	0.0302426015213514	0.105640023160546
2008021	20	0.0348825572870615	0.0986173823009669
2008021	21	0.0356756331596621	0.0741010343262709
2008021	22	0.033432021843619	0.0574911010573799
2008021	23	0.015550435982337	0.0277011935404238
2008022	0	0.00513753638553732	0.0087806546770609
2008022	1	0.00365590590435229	0.00644335315037747
2008022	2	0.00298117811913457	0.0083313565831057
2008022	3	0.00333016603510651	0.0164728360296534
2008022	4	0.00191954168283706	0.00962711950308496
2008022	5	0.001244719875254	0.00454986802335024
2008022	6	0.0226052169910621	0.0838628337038972
2008022	7	0.248447945969817	1.5125556895198
2008022	8	0.390570375923473	1.65697543351635
2008022	9	0.439726553530764	1.69682661150816
2008022	10	0.375709849778922	1.63657499091698
2008022	11	0.332271479209838	1.40237875128835
2008022	12	0.315648956815534	0.992753984995928
2008022	13	0.309884327003182	0.870455555139336
2008022	14	0.300516804292553	0.859933900694436
2008022	15	0.319161897276928	0.770082617431694
2008022	16	0.342551853674465	0.611958610903954
2008022	17	0.355216823801768	0.547769154433226
2008022	18	0.36082739264191	0.521815579780972
2008022	19	0.340050677598448	0.514963013021145
2008022	20	0.331308808440342	0.573678560944826
2008022	21	0.317684494611243	0.531318752334814
2008022	22	0.300363209487907	0.566691290398038
2008022	23	0.267990994668839	0.580998335041638
2008023	0	0.206795215664751	0.559996085866231
2008023	1	0.139601026211828	0.485193169485125
2008023	2	0.115985286219106	0.414130071943935
2008023	3	0.114291358315592	0.366899821233371
2008023	4	0.120924132456874	0.366519296558222
2008023	5	0.149719619611766	0.431191290080698
2008023	6	0.188455141681573	0.521852791903976
2008023	7	0.227090567137599	0.769907108261892
2008023	8	0.237093257939189	0.719739094295119
2008023	9	0.249924402159613	0.63086863912635
2008023	10	0.264537914336962	0.564428063487851
2008023	11	0.277852837039535	0.502279206607126
2008023	12	0.325786387077649	0.746392140580861
2008023	13	0.372813920703544	0.752375234018098
2008023	14	0.373446361251945	0.715734937993777
2008023	15	0.342210774648087	0.619607708031073
2008023	16	0.290798673215538	0.398787226368499
2008023	17	0.235383902891223	0.313936389885707
2008023	18	0.199883573356311	0.288531188788489
2008023	19	0.174588971658493	0.284975501457702
2008023	20	0.16382935506872	0.270770238686577
2008023	21	0.0855129242978803	0.131173125430645
2008023	22	0.0299581347235049	0.037385482112524
2008023	23	0.0488382655497561	0.0622389099769245
2008024	0	0.0786019932892275	0.124045312921286
2008024	1	0.109975297989677	0.19967161192235
2008024	2	0.121125345914882	0.229661814304358
2008024	3	0.123206933301227	0.219509692498747
2008024	4	0.119236691355712	0.225443306599573
2008024	5	0.116118371974127	0.267750188286743
2008024	6	0.112771553750645	0.303496164507752
2008024	7	0.110098507129156	0.33670259234537
2008024	8	0.102426191775738	0.282794395957387
2008024	9	0.0957147333222156	0.281151500824175
2008024	10	0.0953455992696849	0.252743978584965
2008024	11	0.106798395395209	0.283425189026562
2008024	12	0.117132480340762	0.277993700876039
2008024	13	0.122461985325457	0.264421697464728
2008024	14	0.120767763366164	0.265190710968598
2008024	15	0.124070044558841	0.259028196706499
2008024	16	0.110575142455818	0.250812296492893
2008024	17	0.0488061185322573	0.110686383300432
2008024	18	0.0398932497874975	0.231003673066995
2008024	19	0.156834536092519	0.845396439089196
2008024	20	0.267493809956948	1.2547061668963
2008024	21	0.345488739258249	1.32324717059584
2008024	22	0.346794204414177	1.13496126553881
2008024	23	0.247405524301765	1.03654577822381
2008025	0	0.193127922722315	1.36923906581834
2008025	1	0.17274530680356	1.40959320308062
2008025	2	0.160878605087224	1.30589413092136
2008025	3	0.163944448188644	1.23270610869564
2008025	4	0.164832811072437	0.772737833021504
2008025	5	0.160254587661422	0.555817058694266
2008025	6	0.151370653075247	0.540337102333713
2008025	7	0.178127891619121	0.797733426666169
2008025	8	0.213198832531295	0.805068183218057
2008025	9	0.258504571225179	0.866831008026329
2008025	10	0.254509041333005	0.766129929679297
2008025	11	0.22522836863118	0.623822190547569
2008025	12	0.185287916393295	0.641152716786822
2008025	13	0.166540565570188	0.614155447951883
2008025	14	0.163339146594161	0.611994156332597
2008025	15	0.189569792575446	0.697028724841612
2008025	16	0.208656645935227	0.665678098662136
2008025	17	0.224425945074666	0.606484861132605
2008025	18	0.23473456997591	0.566270227974902
2008025	19	0.239882000897584	0.522597085687743
2008025	20	0.248799430942131	0.496429079550649
2008025	21	0.251963879327869	0.50594807290885
2008025	22	0.254324720375395	0.626618575639074
2008025	23	0.273930686947893	0.869398558933948
2008026	0	0.301238974706593	1.19297189248428
2008026	1	0.316480301781493	1.2693184591041
2008026	2	0.319934609119317	1.15983841538562
2008026	3	0.317415295032751	1.04476798605951
2008026	4	0.333751006538102	1.19059024698959
2008026	5	0.352888652622709	1.31664306632366
2008026	6	0.355431925437682	1.2718492135114
2008026	7	0.363375595356148	1.3323960407172
2008026	8	0.371484775127008	1.42464722768594
2008026	9	0.378248222529206	1.49330657641629
2008026	10	0.378825517170294	1.59265808242274
2008026	11	0.367132896926085	1.56540109029926
2008026	12	0.356179912106411	1.5310272820659
2008026	13	0.364400678598231	1.52529342730713
2008026	14	0.375855914919812	1.52759761936735
2008026	15	0.409805261480313	2.02690586601595
2008026	16	0.449192616453353	2.5980053177535
2008026	17	0.44803927608615	2.90995185254093
2008026	18	0.400510919579129	2.72282802947704
2008026	19	0.311328628516743	2.21434861632136
2008026	20	0.228622253619097	1.6749866688934
2008026	21	0.213821152546499	1.51959700296917
2008026	22	0.243610294254836	2.10839902177895
2008026	23	0.337517575196646	3.21873791411095
2008027	0	0.395850762266864	3.69398004648288
2008027	1	0.390679851113469	3.50303971902688
2008027	2	0.39828776062344	3.39562862446992
2008027	3	0.384115296976312	3.10538100725003
2008027	4	0.338044454019905	2.40994486622776
2008027	5	0.229744263219414	1.30449744210852
2008027	6	0.107736841356109	0.480224024652438
2008027	7	0.0317146414838008	0.114599284906149
2008027	8	0.00830508546986569	0.0225991428600273
2008027	9	0.00327615745514292	0.00730579727833937
2008027	10	0.00232114528109819	0.00531747722708069
2008027	11	0.00296135694720971	0.0129142255013305
2008027	12	0.00533126183813785	0.0301698882391523
2008027	13	0.00812942169900623	0.0394445487998042
2008027	14	0.0100780184563765	0.0442284159688459
2008027	15	0.0146486686050564	0.0665579722657634
2008027	16	0.0241596645093532	0.126443385512205
2008027	17	0.0439499684586325	0.235883375572085
2008027	18	0.0779174926744588	0.355999994734746
2008027	19	0.117284895878035	0.540768063073543
2008027	20	0.143745327831984	0.577761390878925
2008027	21	0.154432643007254	0.593178453784215
2008027	22	0.150163215661553	0.542987199792098
2008027	23	0.144977636773861	0.557279173922377
2008028	0	0.143319498361038	0.718021050381039
2008028	1	0.136478255902386	0.690771163769443
2008028	2	0.11888415960035	0.614039008278841
2008028	3	0.10658523701683	0.50816269001112
2008028	4	0.0971522730386257	0.394314075061097
2008028	5	0.0896355275191261	0.310156510100445
2008028	6	0.0866967224367401	0.247871365472694
2008028	7	0.0867319538664445	0.203191404684664
2008028	8	0.0950204497547708	0.188992008542258
2008028	9	0.119312389702214	0.199902664380275
2008028	10	0.16760991651102	0.254373197917161
2008028	11	0.252323122238912	0.378361774977353
2008028	12	0.406179725462271	0.624859655065756
2008028	13	0.589654848720824	0.914857611438002
2008028	14	0.6501492105998	0.997715296982979
2008028	15	0.611180234806627	1.03760454148542
2008028	16	0.545215759016431	0.985536060817571
2008028	17	0.491309365769984	0.93344460114368
2008028	18	0.439188442786388	0.896463030809972
2008028	19	0.450343649266337	0.782143276261627
2008028	20	0.45732002430129	0.883744850456235
2008028	21	0.457700890705404	0.799604950249652
2008028	22	0.464765457127483	0.709171266518551
2008028	23	0.471132766488724	0.637323096784916
2008029	0	0.423943540521058	0.609910996956673
2008029	1	0.361674456034262	0.545306473735802
2008029	2	0.342898283053501	0.473928236632494
2008029	3	0.330559428456434	0.447531698250327
2008029	4	0.328617597060173	0.447116422611916
2008029	5	0.321054486549271	0.446963973112194
2008029	6	0.321093342539808	0.44571607295182
2008029	7	0.321882180000642	0.444318965155178
2008029	8	0.322450511870856	0.442939114718538
2008029	9	0.360181436802824	0.482186543436905
2008029	10	0.36602093143679	0.53772316754035
2008029	11	0.296323100119777	0.622347710582154
2008029	12	0.293683054827685	0.646273630919492
2008029	13	0.308531805248276	0.650249841366891
2008029	14	0.319022253996906	0.642586233743344
2008029	15	0.322938462538436	0.627146207766021
2008029	16	0.319455071394397	0.593517059949708
2008029	17	0.31424010890328	0.545827607429562
2008029	18	0.305850926936354	0.496375640263319
2008029	19	0.288513685722966	0.451607017544182
2008029	20	0.276812274217442	0.417887423474572
2008029	21	0.268391314067011	0.389178786343949
2008029	22	0.249152548683195	0.347146179297105
2008029	23	0.220152178238071	0.292546609248919
2008030	0	0.193061862614794	0.251343268831322
2008030	1	0.188854129712628	0.247298966797317
2008030	2	0.203039326738157	0.305790816921264
2008030	3	0.227850535659228	0.402470315520937
2008030	4	0.256793161752574	0.486780186042237
2008030	5	0.274009349306792	0.537421311418555
2008030	6	0.276231088082323	0.54742654827192
2008030	7	0.271999888242845	0.526634459113177
2008030	8	0.268185880424421	0.465493597213111
2008030	9	0.302598244087318	0.654761372712432
2008030	10	0.308779222782624	0.624022746648289
2008030	11	0.312702600154283	0.701128541915062
2008030	12	0.258919550812438	0.464350824016641
2008030	13	0.220145956091718	0.363327824978089
2008030	14	0.179414283485218	0.334842566579635
2008030	15	0.144487352680664	0.299229933482597
2008030	16	0.115026358165591	0.228478333423449
2008030	17	0.0513524143032125	0.103278295576697
2008030	18	0.0394121129415163	0.0748447637174172
2008030	19	0.0894818858060978	0.199767959207984
2008030	20	0.114064913443789	0.244786566157434
2008030	21	0.12514393999272	0.194886034358438
2008030	22	0.133887145215892	0.181318610804499
2008030	23	0.200494836672891	0.288120415268371
2008031	0	0.252764480533598	0.444631828732814
2008031	1	0.239017603482315	0.483766414689665
2008031	2	0.201423171390502	0.459433285674304
2008031	3	0.169156434493759	0.322588136949039
2008031	4	0.153562415044951	0.259596770520292
2008031	5	0.144871397299368	0.24965847425455
2008031	6	0.143221596070055	0.249806397465226
2008031	7	0.139516087696268	0.26193557875499
2008031	8	0.14930119960974	0.290468691879919
2008031	9	0.179962864897272	0.57909787257603
2008031	10	0.215128794189532	0.992826900215132
2008031	11	0.221325975687327	0.943928220693356
2008031	12	0.20734329421721	1.08467871090051
2008031	13	0.15641558956886	0.589690715542802
2008031	14	0.138212511504351	0.41331892331919
2008031	15	0.130153069748589	0.349461724166081
2008031	16	0.114394278621325	0.295555436021508
2008031	17	0.107746778160401	0.25474724741337
2008031	18	0.111315942586103	0.228045584249126
2008031	19	0.113827072060564	0.204503263319626
2008031	20	0.102202564300616	0.171478069581462
2008031	21	0.0970383543201113	0.251739905451769
2008031	22	0.108064137992462	0.385995466823473
2008031	23	0.0915308603956269	0.238225720445616
2008032	0	0.085976577532829	0.197660824803949
2008032	1	0.0927066238879611	0.215988442762714
2008032	2	0.0958877097152123	0.217184786754653
2008032	3	0.0901813580569327	0.19252126794987
2008032	4	0.0812187912904301	0.166293810357113
2008032	5	0.0780763651080008	0.157999184113295
2008032	6	0.0775599332281567	0.153404135152508
2008032	7	0.0721262809065401	0.146615135974513
2008032	8	0.0769736932825445	0.217508377824349
2008032	9	0.101031496409927	0.321190346726256
2008032	10	0.123103106626641	0.43027189701446
2008032	11	0.157642365682796	0.544074878356992
2008032	12	0.20341602412546	0.765567323307609
2008032	13	0.231510708286501	0.781966280426651
2008032	14	0.263406658469902	0.871140540529839
2008032	15	0.283052852323401	1.02457062384934
2008032	16	0.289782385514344	1.03787682040601
2008032	17	0.299900167675391	0.943274123048959
2008032	18	0.29585524779833	0.879985965970552
2008032	19	0.279287828593282	0.902447543169733
2008032	20	0.269147986335389	0.828241757647904
2008032	21	0.262684696178835	0.752361131978096
2008032	22	0.254467959529404	0.718675516292968
2008032	23	0.258564482360138	0.788843580532062
2008033	0	0.279837645876354	0.888485220599569
2008033	1	0.320112445988303	0.996466794845531
2008033	2	0.437196464433358	2.05608062446888
2008033	3	0.55312218957563	2.35892659745318
2008033	4	0.806692441618729	3.24912569894761
2008033	5	0.884160111025286	4.6953860636982
2008033	6	0.751993955797917	4.40476966384375
2008033	7	0.626299520632983	4.16841055941576
2008033	8	0.805780265885713	6.45739408030287
2008033	9	0.805425581185526	7.05586978205438
2008033	10	0.78743255674111	6.48723222842976
2008033	11	0.804735449619442	6.04950336144063
2008033	12	0.767637187268888	5.25617165560535
2008033	13	0.503714131163654	2.83799881961726
2008033	14	0.427997043114702	2.99367060398791
2008033	15	0.421254099614553	3.10645731463996
2008033	16	0.31758428744499	1.86379030795201
2008033	17	0.233420971316109	1.19019567562598
2008033	18	0.301710395224188	1.35135691739204
2008033	19	0.401501652556872	1.65554512613663
2008033	20	0.413472367475611	1.53634261586526
2008033	21	0.399145134181102	1.3364785292137
2008033	22	0.367202141813987	0.961941786072889
2008033	23	0.335336394243278	0.709421659749468
2008034	0	0.333774814510641	0.614718398387283
2008034	1	0.33910600649737	0.579071248553635
2008034	2	0.351402755911876	0.53310168093466
2008034	3	0.356874619157	0.480915575985131
2008034	4	0.35654451330555	0.451402050254985
2008034	5	0.351877157163091	0.44304600716908
2008034	6	0.347651871596505	0.450138233008247
2008034	7	0.345277517825152	0.476311968750056
2008034	8	0.339913019509723	0.482659515448383
2008034	9	0.339351299114871	0.530526280951409
2008034	10	0.329691554709425	0.531659281431697
2008034	11	0.298884645306392	0.422433274069299
2008034	12	0.268716360442891	0.368147934551478
2008034	13	0.264561206753499	0.53296750313767
2008034	14	0.281432783290546	0.911539583423369
2008034	15	0.288689802946984	0.952383574902797
2008034	16	0.284659602950364	0.773864599089815
2008034	17	0.289219277763447	0.694759737999305
2008034	18	0.294592222935276	0.694153683449178
2008034	19	0.309961325038111	0.550086496107479
2008034	20	0.336288438891398	0.536418874345356
2008034	21	0.366751656546947	0.521608689792317
2008034	22	0.390234982136788	0.493097348529316
2008034	23	0.402971245878454	0.486609062682947
2008035	0	0.40568685302471	0.478550101048587
2008035	1	0.39396797782895	0.459486798579501
2008035	2	0.377531380294008	0.439268937106967
2008035	3	0.360391309579152	0.422918255137604
2008035	4	0.349635186295383	0.410076139518549
2008035	5	0.343172181383571	0.400607026715337
2008035	6	0.344301421624673	0.39935610457467
2008035	7	0.341890174095951	0.401562143350996
2008035	8	0.341383259151561	0.40125797024858
2008035	9	0.348288835816997	0.424309780047097
2008035	10	0.342122606381911	0.416939146112128
2008035	11	0.321290412726391	0.387516190389094
2008035	12	0.28973406798675	0.341488890379554
2008035	13	0.255875617970244	0.295442174128122
2008035	14	0.237915962711358	0.276592104342459
2008035	15	0.248176834139393	0.289983979634084
2008035	16	0.274800151971816	0.326817349249248
2008035	17	0.25441558570707	0.32201254906509
2008035	18	0.121647586263155	0.180863070832761
2008035	19	0.0756385468330495	0.276188135408707
2008035	20	0.0740235789528805	0.235375481084588
2008035	21	0.0756372834635024	0.18868355667805
2008035	22	0.0738968693516915	0.157534562054905
2008035	23	0.0658596256497842	0.124943549921134
2008036	0	0.0644165350919104	0.117726115183971
2008036	1	0.0678823362426556	0.12441781142837
2008036	2	0.0766473489162369	0.136623576279164
2008036	3	0.0907556588498958	0.209693066553113
2008036	4	0.101464706313612	0.301187169397252
2008036	5	0.103751072740169	0.278071039662827
2008036	6	0.106442090166403	0.297458553247315
2008036	7	0.106154954218752	0.277830672905914
2008036	8	0.10550323673765	0.274615879905943
2008036	9	0.107756798733964	0.244130385295597
2008036	10	0.111465912704613	0.281272457539512
2008036	11	0.113224284458491	0.3610014705389
2008036	12	0.103198003058743	0.295626026128955
2008036	13	0.0924917350645116	0.254426955585826
2008036	14	0.0869584187854719	0.234665297421583
2008036	15	0.0875170077794582	0.228835124603801
2008036	16	0.0892020277524336	0.24950756229483
2008036	17	0.0913064272555985	0.299744150718996
2008036	18	0.0908709727683335	0.238151374908205
2008036	19	0.0684148209940445	0.143191235028242
2008036	20	0.0408746348981697	0.0959054305923861
2008036	21	0.0459798515375365	0.134917229484301
2008036	22	0.108227094196525	0.358096698118132
2008036	23	0.107760094432583	0.319031566257269
2008037	0	0.00934232013711389	0.0201017175921824
2008037	1	0.0218732956671298	0.0673900993889433
2008037	2	0.0641819577416649	0.324147024979977
2008037	3	0.135643934460142	0.892975365440716
2008037	4	0.150457846250543	0.947888171266438
2008037	5	0.108936163901714	0.589120864682299
2008037	6	0.0865810328557995	0.4129763304969
2008037	7	0.0682115119156702	0.288992852599499
2008037	8	0.069614963755416	0.490086361691046
2008037	9	0.111932899264053	0.848238032927686
2008037	10	0.0718230893186424	0.573014341425034
2008037	11	0.0372575179161273	0.328659755759083
2008037	12	0.0445502669919818	0.299117156206859
2008037	13	0.0132690768670808	0.0608085245704951
2008037	14	0.347781203725454	3.00199147222681
2008037	15	0.423558901449946	3.21301834849892
2008037	16	0.355248844883196	2.83541022302587
2008037	17	0.449755214075319	3.68783997770314
2008037	18	0.581460303784	4.42116362489458
2008037	19	0.594631892732765	4.372753649927
2008037	20	0.475421604625985	3.90778395007947
2008037	21	0.378098123179318	3.72571424282337
2008037	22	0.320450801928452	3.37733806504284
2008037	23	0.293877818710734	2.78930722247674
2008038	0	0.24976247405731	2.32086343501973
2008038	1	0.291585860107372	3.19391888278314
2008038	2	0.322613743079406	4.34474947057287
2008038	3	0.339166838602464	4.16634074653016
2008038	4	0.316310116018799	3.12284030336797
2008038	5	0.254042676291115	3.3036291643714
2008038	6	0.228024492787923	3.0968809687344
2008038	7	0.242337224247671	3.11424656277722
2008038	8	0.276510749323434	3.19073799536183
2008038	9	0.318545374927297	3.02703913939644
2008038	10	0.354062345887645	2.96117862827189
2008038	11	0.353316192824201	2.5872985599339
2008038	12	0.343039657911002	2.33732305554171
2008038	13	0.314753927393643	2.04621166088927
2008038	14	0.293859414708721	1.65276067164604
2008038	15	0.276603264754685	1.19564522742602
2008038	16	0.273503896259826	0.961280131667556
2008038	17	0.288415240336033	0.776280706918625
2008038	18	0.304393805563527	0.630830682301048
2008038	19	0.311922323363136	0.556342256451571
2008038	20	0.321547735504922	0.521611166397689
2008038	21	0.327576203309139	0.496500148413884
2008038	22	0.331602034528105	0.46951022311208
2008038	23	0.337690980764621	0.453949151468941
2008039	0	0.345919600132369	0.444143611901211
2008039	1	0.352759542147098	0.437962930555803
2008039	2	0.360880775520422	0.444955843475522
2008039	3	0.366481054956728	0.455667410209761
2008039	4	0.368368779639259	0.463387138873715
2008039	5	0.364476327233401	0.459153291059698
2008039	6	0.358876022378477	0.451154654219086
2008039	7	0.346488667316113	0.438399306377548
2008039	8	0.357617802128246	0.505294231497874
2008039	9	0.349746430313641	0.519500394647522
2008039	10	0.359725573961895	0.670072930504235
2008039	11	0.346684987268239	0.766616655746256
2008039	12	0.341312746791772	1.02406317511632
2008039	13	0.337668952291957	1.18890791752671
2008039	14	0.321750893273676	1.13471351244886
2008039	15	0.320751340857056	1.18573112353392
2008039	16	0.309412729092799	1.09846075354255
2008039	17	0.302454910276244	1.04336669093807
2008039	18	0.292549926805203	0.9693682019019
2008039	19	0.283631578358162	0.923823514876867
2008039	20	0.273950413859503	0.888446644483631
2008039	21	0.26455372659451	0.865645739249525
2008039	22	0.252463248037349	0.857299779549231
2008039	23	0.244409972279034	0.874939214069093
2008040	0	0.234955683945009	0.845131768178039
2008040	1	0.230235659624517	0.810733200082435
2008040	2	0.230667992568515	0.776326693575374
2008040	3	0.233170377329308	0.743197414862899
2008040	4	0.236482872154865	0.709406933944091
2008040	5	0.242543559683919	0.684487130675224
2008040	6	0.250432706629186	0.671228833929712
2008040	7	0.265029772716601	0.668752144047169
2008040	8	0.274116580973272	0.63869550131466
2008040	9	0.26148889906107	0.586300753572337
2008040	10	0.250792284111695	0.583381052478183
2008040	11	0.230072671437502	0.740880655048153
2008040	12	0.193391263422746	0.759835271121588
2008040	13	0.174420084912302	0.701510175355596
2008040	14	0.16452578265663	0.551597352800738
2008040	15	0.151109211890624	0.368403832363537
2008040	16	0.134174039143328	0.250274174938277
2008040	17	0.119695492913731	0.186989019944775
2008040	18	0.111789810961794	0.159944158194653
2008040	19	0.107272294816515	0.145364356145031
2008040	20	0.104391142465868	0.137642397329979
2008040	21	0.102732201583867	0.133160059259776
2008040	22	0.100561038363175	0.130105224648994
2008040	23	0.0990357818978017	0.128801321029647
2008041	0	0.100727088866143	0.132197326656898
2008041	1	0.102083919558083	0.133996330935261
2008041	2	0.101459232769144	0.132590389096111
2008041	3	0.100513094765645	0.132138828009418
2008041	4	0.100286812625649	0.132635526567697
2008041	5	0.0999422183487063	0.13467907958081
2008041	6	0.0998452931345248	0.137482246224082
2008041	7	0.0998723428250558	0.139945736765806
2008041	8	0.100893492924481	0.144848491973884
2008041	9	0.109162097163879	0.183563988236923
2008041	10	0.117003408427758	0.233343150620606
2008041	11	0.121640016180352	0.340369635259176
2008041	12	0.110225676998013	0.308747821149393
2008041	13	0.100348577438675	0.316495566398245
2008041	14	0.093779411279306	0.26245682550203
2008041	15	0.0799848064059896	0.16828257873535
2008041	16	0.0690580950792371	0.124434840977093
2008041	17	0.0630293089943148	0.105499534540729
2008041	18	0.0590793071432826	0.0922010724474192
2008041	19	0.0564529577967672	0.0842180377992103
2008041	20	0.0543190695185809	0.0792685929373232
2008041	21	0.0529838558560402	0.0762265088014688
2008041	22	0.0516287184434053	0.0741623590573676
2008041	23	0.0511603102745064	0.0724374392014621
2008042	0	0.0503805635171033	0.0712022236415409
2008042	1	0.0485843894211001	0.067299223210072
2008042	2	0.0469502642976741	0.0640364078223839
2008042	3	0.0456376977497819	0.0616841199073815
2008042	4	0.0445060902512413	0.0601162768933961
2008042	5	0.0439122024991979	0.0591988419136824
2008042	6	0.0437316578540599	0.0588074077538444
2008042	7	0.0433117245210642	0.0577553056763295
2008042	8	0.0425487450111168	0.0564819847120734
2008042	9	0.0437472547674072	0.0601635317164637
2008042	10	0.0468897890600281	0.0766378398730728
2008042	11	0.0494755909006696	0.101702786739188
2008042	12	0.05555122565855	0.160217321592082
2008042	13	0.0583508882941739	0.193469739870957
2008042	14	0.0589042675771436	0.204484377210067
2008042	15	0.0574589597811622	0.194471396677388
2008042	16	0.055429922159634	0.176930928300168
2008042	17	0.0538773743396108	0.161032047921463
2008042	18	0.052142747032261	0.145614332523857
2008042	19	0.0501911841517678	0.130206457205752
2008042	20	0.0480222679230339	0.116022893751393
2008042	21	0.0462063421097955	0.104049985844224
2008042	22	0.0447197711362668	0.0946048948686814
2008042	23	0.0436662980759653	0.0883608027198556
2008043	0	0.0432106021595495	0.086262168989167
2008043	1	0.043367174767557	0.0890081755830335
2008043	2	0.0438222980443565	0.0943427039514748
2008043	3	0.0443898718751293	0.0996563366982849
2008043	4	0.0443992212970719	0.103077735788398
2008043	5	0.0437682909418747	0.103872791228587
2008043	6	0.0428877580298209	0.102074937133366
2008043	7	0.0416279948159925	0.0984544463589742
2008043	8	0.0397078684505008	0.0943672047278074
2008043	9	0.0380103194151565	0.101634068208285
2008043	10	0.0464654601670956	0.156361679304503
2008043	11	0.0555275454323521	0.208849492524471
2008043	12	0.0567821594050278	0.219453896830209
2008043	13	0.0656687511317611	0.265201106674023
2008043	14	0.062969009300824	0.244091952473038
2008043	15	0.0599526263595313	0.234726397629142
2008043	16	0.0582170827452157	0.229314908003913
2008043	17	0.0573921216635844	0.211047241061034
2008043	18	0.0562079791629277	0.192456028066376
2008043	19	0.0561705902509277	0.176973449967204
2008043	20	0.0558087629918554	0.164030368365651
2008043	21	0.0560626268901456	0.152865304772834
2008043	22	0.055050401965182	0.143429647181141
2008043	23	0.0541039182376297	0.135656527286301
2008044	0	0.0541163709210864	0.129437034606032
2008044	1	0.0532360170079459	0.124802180547207
2008044	2	0.0522931260772827	0.120629714672805
2008044	3	0.0511549079965005	0.116104280430927
2008044	4	0.0499483138854723	0.111872465845396
2008044	5	0.0481652928036538	0.107649575353309
2008044	6	0.0474412776540784	0.103313434240611
2008044	7	0.0459907215962831	0.0989021515520141
2008044	8	0.0435486479431902	0.0940555121525175
2008044	9	0.0484628710986804	0.125437408374549
2008044	10	0.0538646180898707	0.143077442328038
2008044	11	0.0525040111087878	0.154521598668469
2008044	12	0.0503728554860239	0.145327616009783
2008044	13	0.0512622076931694	0.142070009554442
2008044	14	0.0561007433171878	0.176348315060609
2008044	15	0.0622863308863326	0.212675574337728
2008044	16	0.0637654300462462	0.237220492946542
2008044	17	0.0640812574799107	0.253669556397234
2008044	18	0.0624290899238982	0.257195177135221
2008044	19	0.0599621045937115	0.260958742134854
2008044	20	0.0589584927729431	0.270791808689336
2008044	21	0.0563588669242592	0.254320625001193
2008044	22	0.0535255358698029	0.241955362254002
2008044	23	0.0543573409050604	0.242761807597612
2008045	0	0.0543082030032853	0.243572965747136
2008045	1	0.0532825080242475	0.240779314510565
2008045	2	0.0543639663909943	0.238753407997609
2008045	3	0.0527591904981482	0.235452368781663
2008045	4	0.0509327152865756	0.227863287172721
2008045	5	0.0469098202158116	0.218275226826469
2008045	6	0.0439700758827608	0.206352600918142
2008045	7	0.0474075604827351	0.249427745875639
2008045	8	0.0486001593301038	0.234041087626059
2008045	9	0.0494225137065135	0.21254393234196
2008045	10	0.0476993654485231	0.185032612888066
2008045	11	0.0456643064587239	0.174135816169214
2008045	12	0.0558630188142461	0.216857630321125
2008045	13	0.0647753061709019	0.214937829461872
2008045	14	0.0665197046061054	0.217839992173796
2008045	15	0.0685959484002645	0.285366591466338
2008045	16	0.071861377781227	0.26387513701758
2008045	17	0.0698681382880321	0.191537356821558
2008045	18	0.0692082872204958	0.133063346887974
2008045	19	0.0807816557657999	0.120532300040035
2008045	20	0.1163064456751	0.153543938863099
2008045	21	0.165439155464887	0.201166667262858
2008045	22	0.194749503117953	0.235735975195026
2008045	23	0.202879756390076	0.245090627389737
2008046	0	0.201266750275917	0.246277131234772
2008046	1	0.176026209705075	0.217087872888994
2008046	2	0.140104603539223	0.17882956500741
2008046	3	0.131867741076851	0.178704547697597
2008046	4	0.131895355887281	0.200535003994442
2008046	5	0.161659563269307	0.270905171755729
2008046	6	0.191765733233176	0.303183603643288
2008046	7	0.194098636267649	0.26894560755356
2008046	8	0.206258445611321	0.269632233347515
2008046	9	0.273522419971769	0.471883266402537
2008046	10	0.312134508475499	0.76641637757944
2008046	11	0.309298485416998	0.805751537012901
2008046	12	0.293911251376794	0.70167112738156
2008046	13	0.2614744834819	0.582031293069749
2008046	14	0.227714441941996	0.477479103137527
2008046	15	0.2072146066166	0.40644819647712
2008046	16	0.197615927821907	0.34572668026547
2008046	17	0.18845317273902	0.283114479339247
2008046	18	0.176858473381676	0.232495988060253
2008046	19	0.168235921277073	0.212278324942728
2008046	20	0.171453107707488	0.213360537926656
2008046	21	0.198454196979238	0.263818811360449
2008046	22	0.215473340235173	0.323571612394929
2008046	23	0.228623748875365	0.379061134276637
2008047	0	0.239704042207419	0.389621054993865
2008047	1	0.240766822410664	0.355248979924186
2008047	2	0.243229875724156	0.376736418607103
2008047	3	0.246806546496822	0.396486530925196
2008047	4	0.245312512273096	0.350132007491906
2008047	5	0.239400990242045	0.30114240913951
2008047	6	0.232922289960212	0.272772752620443
2008047	7	0.219393057361728	0.252741894737483
2008047	8	0.20021907351396	0.254580188434273
2008047	9	0.181692051878286	0.313366645912714
2008047	10	0.1667424156376	0.431381982360177
2008047	11	0.161794061454931	0.559125800371532
2008047	12	0.164093224680237	0.596980833755758
2008047	13	0.170010180020904	0.584291755105687
2008047	14	0.171630480571647	0.541745091794374
2008047	15	0.170398725335747	0.478106594758646
2008047	16	0.168261585938996	0.414418900782729
2008047	17	0.164166603930656	0.352149566402528
2008047	18	0.158940851170815	0.310480906921888
2008047	19	0.14999348906353	0.282002910902587
2008047	20	0.139200380918755	0.253397070296889
2008047	21	0.136017443226221	0.218712913408701
2008047	22	0.13329518177675	0.18659933582069
2008047	23	0.127158614627428	0.174131916528192
2008048	0	0.124956864819195	0.177569326173389
2008048	1	0.124663013969739	0.17698845347084
2008048	2	0.124989240953997	0.171809924957831
2008048	3	0.12463532008594	0.166374387222179
2008048	4	0.12423170692476	0.163361500273838
2008048	5	0.123096516637966	0.159690998470584
2008048	6	0.123878616335878	0.1609304426871
2008048	7	0.123785675966163	0.16215749179012
2008048	8	0.12223459192749	0.1639585066704
2008048	9	0.12580887970915	0.178349266447344
2008048	10	0.128920021124447	0.180836506073401
2008048	11	0.131077216764311	0.188664310258141
2008048	12	0.126289331538252	0.167121967127012
2008048	13	0.122564930690265	0.152044376467555
2008048	14	0.118276209009492	0.143140715115969
2008048	15	0.113510069934508	0.137861596785903
2008048	16	0.110511299703599	0.133346837326527
2008048	17	0.106100090828289	0.125929817028075
2008048	18	0.0971113932550041	0.113798108532862
2008048	19	0.0886341512902473	0.102691582490435
2008048	20	0.0820969525463111	0.0942491564696152
2008048	21	0.0766280276822353	0.0880265304962742
2008048	22	0.0713264347960459	0.0835938315426523
2008048	23	0.0688009820746211	0.0830631695846318
2008049	0	0.0688783401634766	0.0816125837259203
2008049	1	0.0687720035364779	0.0810421049434044
2008049	2	0.068162918981449	0.0843351013088102
2008049	3	0.0676299995096603	0.096686395552453
2008049	4	0.070881147560941	0.125975522528639
2008049	5	0.0821351331293977	0.176520408340491
2008049	6	0.0951576511364506	0.239713547652463
2008049	7	0.100904565787057	0.309077731179105
2008049	8	0.130550057661029	0.548042782935159
2008049	9	0.136636555038483	0.559428378892754
2008049	10	0.139951539548968	0.581430279280231
2008049	11	0.143429105869407	0.578719818381186
2008049	12	0.153182011051906	0.655305117687854
2008049	13	0.157664652912296	0.709545398390826
2008049	14	0.153302875922221	0.662895761514124
2008049	15	0.145782889553321	0.600975181696248
2008049	16	0.137161363195672	0.559560506237942
2008049	17	0.134448100627323	0.553797140777041
2008049	18	0.132823416446004	0.585669818679109
2008049	19	0.147792274079353	0.78612141350151
2008049	20	0.173668398354355	1.10951089313224
2008049	21	0.182590225351177	1.25153682985959
2008049	22	0.169695494319176	1.00954777061425
2008049	23	0.169525189519322	0.744315161479924
2008050	0	0.160876622432908	0.551608808373718
2008050	1	0.151109093656329	0.47440279065337
2008050	2	0.1441595696764	0.450070858878323
2008050	3	0.142853556253903	0.440849059196281
2008050	4	0.145128395716014	0.450177596765103
2008050	5	0.151186702086071	0.46720971944379
2008050	6	0.171847949464016	0.566317851987001
2008050	7	0.199092493677625	0.652823603063429
2008050	8	0.211373281326337	0.629163241874622
2008050	9	0.231381019597061	0.716855461110085
2008050	10	0.33683066653676	1.64041891071899
2008050	11	0.358283068054877	1.65573053134191
2008050	12	0.378410849173612	1.5390979052847
2008050	13	0.37841218293668	1.37616051558095
2008050	14	0.375278263776616	1.19132017316741
2008050	15	0.344662189639488	1.08203901496613
2008050	16	0.33071657028338	0.828120871435709
2008050	17	0.299991038073567	0.574237815842894
2008050	18	0.286301015552009	0.532931863315549
2008050	19	0.279615658523107	0.517517750614821
2008050	20	0.274690919591437	0.51093892633413
2008050	21	0.268052144995483	0.496997062974248
2008050	22	0.257037796803206	0.477320324552265
2008050	23	0.23465332500263	0.449539649033472
2008051	0	0.196869626008871	0.405363409260095
2008051	1	0.154993433551507	0.358440946339256
2008051	2	0.126598138011144	0.329077964684297
2008051	3	0.124444328532154	0.35310842066892
2008051	4	0.132249012956242	0.460940292296388
2008051	5	0.150518406623146	0.632737232708097
2008051	6	0.17742007114195	0.758968617172861
2008051	7	0.182070433036449	0.770379017343395
2008051	8	0.190979744993695	1.00013598066644
2008051	9	0.159610693132065	0.859332030125547
2008051	10	0.141121749388666	0.762189307361385
2008051	11	0.138562787944698	0.642715250624897
2008051	12	0.132396889535699	0.456706480710077
2008051	13	0.117867667606454	0.267088627067452
2008051	14	0.111124902630636	0.23264162237606
2008051	15	0.101463165229526	0.186988252681857
2008051	16	0.0873484712316617	0.145653875173339
2008051	17	0.0704690269425234	0.102599603917065
2008051	18	0.0466570001365736	0.0634399959086439
2008051	19	0.0277156233210216	0.0399139583140677
2008051	20	0.0224642436465386	0.0460536554892036
2008051	21	0.024112007880517	0.0679541410571479
2008051	22	0.0325023146030914	0.0948917212219657
2008051	23	0.0402429154547053	0.11477621311368
2008052	0	0.037373116618381	0.113828667238068
2008052	1	0.03465671084911	0.110866486977101
2008052	2	0.0359797507850112	0.115259529305425
2008052	3	0.0371653192516939	0.113670197754838
2008052	4	0.0378663113668155	0.100223247365151
2008052	5	0.0341973856728556	0.078468026408393
2008052	6	0.0292452694501156	0.0596850216158948
2008052	7	0.0272478382635858	0.0537710488776028
2008052	8	0.0407879226344545	0.120453653863398
2008052	9	0.0582711069214921	0.195835425107081
2008052	10	0.0590586098684996	0.17576059938325
2008052	11	0.0579333756167153	0.140921812462498
2008052	12	0.0636862102992647	0.134397685708861
2008052	13	0.0769771885819722	0.158597240498699
2008052	14	0.075836983587586	0.140492053505665
2008052	15	0.0688084818712704	0.110940750485507
2008052	16	0.0670482825620979	0.103259370954877
2008052	17	0.0743868404939397	0.113275955812665
2008052	18	0.0735699011797793	0.118759851382179
2008052	19	0.0851254208997656	0.183158839478323
2008052	20	0.0933401255846943	0.215622145965818
2008052	21	0.0870030300810064	0.192613573122904
2008052	22	0.0775242646188095	0.173337762876785
2008052	23	0.0713037906451019	0.209367571815067
2008053	0	0.0775825332473426	0.305249078269117
2008053	1	0.0849570086901862	0.352560269986834
2008053	2	0.0870769501923972	0.347212675340919
2008053	3	0.0920958765573573	0.302565716834038
2008053	4	0.133637936234343	0.371195023223436
2008053	5	0.173968105921542	0.479361192938109
2008053	6	0.196634317635835	0.547019022210098
2008053	7	0.204743432265795	0.573677681952261
2008053	8	0.217308336333499	0.634001709191691
2008053	9	0.235189583483581	0.774019496823123
2008053	10	0.263612708076426	0.983102718769915
2008053	11	0.289770604177392	1.09787315196599
2008053	12	0.308995038305372	1.05904845810577
2008053	13	0.313711568394717	1.00544257602249
2008053	14	0.316336449775751	0.928223568170532
2008053	15	0.314249724639521	0.892219781488155
2008053	16	0.306241908849677	0.909100224055701
2008053	17	0.289902503279064	0.872395533060567
2008053	18	0.267470551365846	0.826986388429073
2008053	19	0.221245597219291	0.592696337076814
2008053	20	0.213289179247592	0.515793973228283
2008053	21	0.176184167535881	0.382900623152334
2008053	22	0.120160738240561	0.222337081225584
2008053	23	0.0654670691360781	0.14099584699191
2008054	0	0.0254959455835078	0.0715200645177606
2008054	1	0.00523424204885171	0.0126708039095435
2008054	2	0.0544615545223187	0.361356623881699
2008054	3	0.34074302368446	2.47188791684427
2008054	4	0.493239730587162	3.54673573849808
2008054	5	0.52524842361608	3.64843650904359
2008054	6	0.523546320713429	2.91059780348363
2008054	7	0.500076110080607	2.39672480985109
2008054	8	0.461946598926751	2.13144611090171
2008054	9	0.456237946275767	2.69470007091287
2008054	10	0.472607159419697	3.64063985485537
2008054	11	0.471056033704429	3.66402076235367
2008054	12	0.461539495473619	3.34134708257472
2008054	13	0.437552015674844	2.94470607766422
2008054	14	0.418949098397887	2.13660255394297
2008054	15	0.393820440005854	1.47735865460897
2008054	16	0.374129582796231	1.07442060336187
2008054	17	0.353830759398145	0.768787922211232
2008054	18	0.329732583173794	0.578229589380198
2008054	19	0.309222413198606	0.446572207277321
2008054	20	0.286712343974146	0.395745470110301
2008054	21	0.229265444365176	0.309542594550752
2008054	22	0.144902246422888	0.186180112828986
2008054	23	0.0928091040021242	0.128669746021744
2008055	0	0.0857258633535333	0.120349280102566
2008055	1	0.0871159755318898	0.1263571636381
2008055	2	0.107290483052064	0.162655392032009
2008055	3	0.121532611282569	0.182475017001787
2008055	4	0.127675934146	0.19125722541837
2008055	5	0.129841753420478	0.208830981689012
2008055	6	0.13037467333819	0.235314029068138
2008055	7	0.143919091195104	0.430090061059261
2008055	8	0.13267121153101	0.672362579456292
2008055	9	0.122320017428719	0.588176294310458
2008055	10	0.115450997605249	0.424849739933289
2008055	11	0.106068694412639	0.311363750293935
2008055	12	0.096572404564625	0.239826571437787
2008055	13	0.0920308743065291	0.195085927198557
2008055	14	0.0905796891264461	0.166325602516093
2008055	15	0.100309500828642	0.174531692168722
2008055	16	0.120738287833223	0.205719195568655
2008055	17	0.129769496464822	0.200184842559623
2008055	18	0.126964819423101	0.175523447112217
2008055	19	0.116580160833846	0.155839015810852
2008055	20	0.0977840837834007	0.129132062777645
2008055	21	0.0778710581012997	0.103078164314592
2008055	22	0.0461360544396463	0.0630463628131341
2008055	23	0.0343505197466702	0.0432785366185576
2008056	0	0.0320822285793713	0.0410077995468468
2008056	1	0.029897239834414	0.0388492739071558
2008056	2	0.0282582964950468	0.0364946091090842
2008056	3	0.0258060030278223	0.0337192699062049
2008056	4	0.0225898465519415	0.0304788551555392
2008056	5	0.0213703006515284	0.0291989029466892
2008056	6	0.0217801183304762	0.0302845212805774
2008056	7	0.0243031351470737	0.0339087264300077
2008056	8	0.0263188777586591	0.04227927447784
2008056	9	0.0229331322520446	0.0413116239951786
2008056	10	0.0121577736035384	0.0229073396171591
2008056	11	0.0109757337276223	0.0182273767176387
2008056	12	0.0136788503266405	0.0265390221711272
2008056	13	0.0239062346086805	0.0605900585413835
2008056	14	0.0360712034823098	0.0891713053964354
2008056	15	0.0412313515968958	0.0882197374172058
2008056	16	0.0394470041323986	0.0745995121334635
2008056	17	0.0317356004789032	0.0513856163865888
2008056	18	0.0223773022887031	0.0364874501586421
2008056	19	0.0142651535830646	0.0250224601735868
2008056	20	0.0112613097401475	0.0206995209572099
2008056	21	0.0106439772213295	0.0208141062462816
2008056	22	0.0112350374897593	0.0244240792601357
2008056	23	0.0168647037699958	0.0380863999823893
2008057	0	0.0317187799961614	0.0790344053450955
2008057	1	0.0527241027471631	0.15683293815751
2008057	2	0.0517271130383152	0.13830118529305
2008057	3	0.0533485016003701	0.160114984289236
2008057	4	0.0541407795249246	0.141341195829633
2008057	5	0.0486833937785571	0.113153014078837
2008057	6	0.0483626335711946	0.122454910109745
2008057	7	0.0535489461225104	0.130877825509049
2008057	8	0.0555323313817235	0.106950547128703
2008057	9	0.0527455217213022	0.0812150551830618
2008057	10	0.0524690713938281	0.085887445026883
2008057	11	0.0519530865593632	0.0854133780610164
2008057	12	0.0475999339612804	0.0809735613579845
2008057	13	0.0433921376211227	0.0861876792531156
2008057	14	0.0363528197724294	0.0714100493249162
2008057	15	0.0176889627811041	0.0333104191929303
2008057	16	0.0136282992638442	0.0256298580858974
2008057	17	0.0141318431594277	0.0253746396234854
2008057	18	0.0122618274821067	0.0204271453905285
2008057	19	0.00829579270859506	0.0145611119032179
2008057	20	0.00343535645189751	0.0063318083633601
2008057	21	0.00360820418482409	0.00789124488500094
2008057	22	0.0539561236599047	0.185280427693683
2008057	23	0.0840596222375602	0.290767196676069
2008058	0	0.105033386864826	0.393461930607221
2008058	1	0.141599796882712	0.474030869118076
2008058	2	0.15870990101155	0.472580334666682
2008058	3	0.173722968181216	0.527034070735684
2008058	4	0.207371312042819	0.843697063020198
2008058	5	0.25336249654109	0.968437107080061
2008058	6	0.308635432779774	1.08860213571709
2008058	7	0.288453714308079	1.15195773787241
2008058	8	0.232345651386605	1.14006602520186
2008058	9	0.246496921877327	1.09371657766261
2008058	10	0.255650491365629	1.33445014281286
2008058	11	0.303592211919441	1.74252065503561
2008058	12	0.315824114748721	2.19797686156607
2008058	13	0.330357403370063	2.41317342392108
2008058	14	0.264536587232125	1.76758298243494
2008058	15	0.327476587585438	1.99000011677181
2008058	16	0.23415872853521	1.18823049959384
2008058	17	0.215326486335347	0.930377268738638
2008058	18	0.197118157536394	0.757881395031498
2008058	19	0.15887316587752	0.55519873793164
2008058	20	0.113180350979868	0.377880105425672
2008058	21	0.11039236975851	0.382088041741617
2008058	22	0.122842199943715	0.39917374069527
2008058	23	0.11026977505876	0.399315919431533
2008059	0	0.17106738695519	1.1699833706262
2008059	1	0.289923948157987	2.01861091333781
2008059	2	0.38853936452289	2.59460225774211
2008059	3	0.417529178442041	2.90548925506574
2008059	4	0.434854107956448	3.15075253881554
2008059	5	0.460984099879911	3.083267957328
2008059	6	0.464498385141914	2.05576839978035
2008059	7	0.443519620945219	1.2051504537953
2008059	8	0.422783026210297	1.0414523105515
2008059	9	0.406646479764181	1.00351160266052
2008059	10	0.412230308155822	1.36231844858735
2008059	11	0.430463888700478	3.49202526821792
2008059	12	0.413563892984296	3.15193289119739
2008059	13	0.398971038180554	2.43251378108207
2008059	14	0.386341096684263	1.82056397333547
2008059	15	0.372411146381483	1.33940910358257
2008059	16	0.356201913596404	0.933342958068994
2008059	17	0.337032539183767	0.646064292353983
2008059	18	0.31675281966882	0.468837318927201
2008059	19	0.300817985094108	0.400310406730877
2008059	20	0.309426978717909	0.447769086218765
2008059	21	0.304257575667684	0.450322921644489
2008059	22	0.293038837948968	0.516534556115027
2008059	23	0.2544505871029	0.414807850403628
2008060	0	0.205371695109014	0.317726676143939
2008060	1	0.169729500473743	0.272765374334729
2008060	2	0.16068949184201	0.260556606237971
2008060	3	0.162105072036513	0.246880480268818
2008060	4	0.15818549340976	0.238155424578083
2008060	5	0.155872718667683	0.230290916941992
2008060	6	0.150177860394828	0.221031246999481
2008060	7	0.140158711797059	0.211671855393902
2008060	8	0.135872579805664	0.215409197387482
2008060	9	0.129310104783457	0.222710635111461
2008060	10	0.131574582123255	0.387450031338553
2008060	11	0.124584033795009	0.389035012717358
2008060	12	0.106285891325334	0.28646776677724
2008060	13	0.0934661052909177	0.205059389681082
2008060	14	0.0871119435700763	0.162882661380789
2008060	15	0.0846566025029097	0.141557346219952
2008060	16	0.0838803436231295	0.135622052513179
2008060	17	0.0858879887907509	0.126603189185195
2008060	18	0.0914650388171135	0.124072320291271
2008060	19	0.112917743347341	0.161636375847081
2008060	20	0.132425328944922	0.167839991961129
2008060	21	0.125161299091515	0.155361084781627
2008060	22	0.0629728883940426	0.0812730863289157
2008060	23	0.0429433654397467	0.0593867553165592
