# Supplementary material for: A comparison of sea salt emission parameterizations in northwestern Europe using a chemistry transport model setup
Source: Copernicus journal article supplement (doi:10.5194/acp-16-9905-2016), 2016-08-08
Supplement: Supplementary file 2 [file acp-16-9905-2016-supplement.zip › conc/conc.timeseries.values.win2008.sp13.Na.moreStations.csv]

doy	hour	DE0001R	DE0002R	DE0003R	DE0007R	DE0009R	DE0044R	DK0003R	DK0005R	DK0008R	DK0031R	FI0009R	FI0017R	NO0001R	NO0056R	PL0002R	PL0003R	PL0004R	SE0014R	NL0011R
2008001	0	1.88334473633526	0.670793383889195	0.545901436148574	0.894842553692023	0.752659218518478	0.61126952096308	0.97406331770684	1.29899337378735	0.795867106532857	1.32958803240894	0.503217932290539	0.259351904581589	0.608662784725974	0.512034495781003	0.465690937851368	0.456570915146418	0.335885432471595	0.476874054932587	0.939406203995814
2008001	1	1.53941311644444	0.794467906047892	0.524964586815074	0.819946415498805	0.805479242621488	0.655788768902476	1.18150058259252	1.24336707192973	0.86995503721566	1.13465467626506	0.547871447350715	0.275725834598941	0.562338613974094	0.447058635103194	0.532785933620084	0.439630771318101	0.345611879481939	0.48619087429067	0.94753435275235
2008001	2	1.23178159266733	0.779213474916137	0.482366887183992	0.726701655908741	0.67718148540804	0.593983663732557	1.24792418505474	1.4768532324443	0.794224476936962	1.0876591304197	0.499518645114464	0.312183931764962	0.506314640294014	0.391600150225369	0.577070414671672	0.396999546034058	0.354331017559408	0.776895367743201	0.954155163984262
2008001	3	1.28379402797475	0.750890188654231	0.447128555278987	0.626632166924447	0.469990617449534	0.544424803518463	1.01961087905495	2.0532878260592	0.893375767180089	1.03961382638676	0.475588853463498	0.366599179950252	0.405882124031708	0.369944231518856	0.573207620225474	0.330727915408933	0.379086411573852	0.816112155847619	0.99591480756675
2008001	4	1.48440241160397	0.724687160163828	0.421624594053198	0.541858469636146	0.39046265765701	0.540875280061797	0.791063699299546	2.43511716940735	0.936899580645727	0.961228059238813	0.516837813700008	0.430331516602234	0.351337693983027	0.349039912933715	0.577258696192113	0.312391143887584	0.360482459660821	0.620331874615149	1.00245596769925
2008001	5	1.46504430981932	0.711753531351431	0.399830567789885	0.50099306592876	0.376027479159283	0.510341669849834	0.618080489869663	2.08963735949003	0.871012039903595	0.830474235466115	0.609063770537679	0.496346348981101	0.367887944755536	0.325176080843097	0.5863468986416	0.300441142025416	0.309012801163042	0.504803103838479	1.01529370469214
2008001	6	1.51462163885075	0.757311758395839	0.389834181586238	0.460092007139278	0.365878542479627	0.501166154671458	0.643625869200756	1.19622500094275	0.922465970689935	0.679871291475923	0.728332908172511	0.493517087146571	0.381412656316969	0.296529344522263	0.590669819617395	0.294065020017827	0.261009808382468	0.416778939445058	1.03454027373181
2008001	7	1.75906707362034	0.800972134990141	0.444592020863606	0.465419751139062	0.349202168658251	0.500222487689441	0.770885278370343	1.0110971291253	0.53801432968958	0.553493171416642	0.8168052523993	0.473495711936748	0.394210760344776	0.264732867928916	0.692939980018825	0.289834019562196	0.257961074906843	0.327281561651619	1.04619637377281
2008001	8	1.96113705831769	0.82071841557413	0.527186259763925	0.409764617236453	0.326786502641265	0.491111747672483	0.780405773543368	1.01781779367413	0.591916935401254	0.54059908650846	0.842544998658571	0.448174934293392	0.356108001956941	0.225933420669246	0.75109736144695	0.291044833294478	0.271548413735497	0.270347755952011	1.04225784124163
2008001	9	2.18666629008676	0.812395159608422	0.607198838072325	0.353222756825978	0.304335936705199	0.54602726086552	0.797458957688485	1.11219337610673	0.740541774476851	0.605575757202937	0.92810374523899	0.478195449700157	0.30924913963455	0.179747496057179	0.678712539374487	0.34469688775566	0.271162409952724	0.238682118616976	1.00766747943968
2008001	10	2.34036294566456	0.836010385997889	0.510694550177016	0.305834948287383	0.287587412775697	0.660535264140877	0.784825249564825	1.0183590227953	0.752069987839265	0.641492951703817	1.05157540134198	0.490566759918959	0.286596479649773	0.153978222741148	0.59091277248831	0.337828088410348	0.264185377219309	0.217251104652056	0.988105086391029
2008001	11	1.88286769953094	1.04197057037328	0.474062499096165	0.279570176665189	0.272499783579473	0.606748973102276	0.730949748108591	0.865060542918369	0.506179072320937	0.606772274802997	1.03163271754598	0.512749159375556	0.245362628454045	0.145550966034055	0.493834365535402	0.330947533175606	0.273220346368282	0.219416186419049	0.981889538148129
2008001	12	1.42713955320737	1.21769180649717	0.383155670909901	0.26181895073095	0.255376210087038	0.57300799005833	0.665516527756396	0.740393583484934	0.299213023016916	0.534011902460369	0.889452485489739	0.536831552477914	0.222065623357286	0.139917344598849	0.353057607897155	0.360367332113524	0.273058909938257	0.231635310370077	0.953323227287882
2008001	13	1.15786942751977	1.15179613824352	0.25201678210161	0.246396763035608	0.237431856425552	0.632970059977017	0.618411162904262	0.58704905758199	0.293556104625006	0.453029855749395	0.756875812176857	0.579943298112219	0.191843574773612	0.12608016915715	0.264604646995152	0.366447635945097	0.270913396394893	0.233530044677447	0.908502824765892
2008001	14	0.983771247127167	1.11401717533961	0.202084037154643	0.238008472901335	0.219993917536897	0.83097660107301	0.555999300916041	0.46902877294393	0.29516107237833	0.395463219022634	0.686084437662873	0.566970594790114	0.162976788463843	0.120277352834287	0.174339322601743	0.353046864011508	0.252573473245918	0.239225131505925	0.865093128527792
2008001	15	0.848475949670474	1.08140881444258	0.165295354058942	0.235105174773582	0.215377348870288	0.825003195954054	0.445239173175741	0.395717908365002	0.303784809910428	0.352506658585837	0.667016979203461	0.524622702795851	0.138513112848769	0.122383472402505	0.130685875290272	0.338657990071504	0.242026102394858	0.244849610008626	0.821740750641244
2008001	16	0.769204775034135	1.06128322606279	0.156820009565169	0.237341057318197	0.290826124156031	0.680034375006269	0.356397386482157	0.345048704410313	0.342166018552126	0.326839562661692	0.644689308970092	0.530315825709694	0.134990495167123	0.124895649868067	0.130110382553297	0.346819517671601	0.245474609919772	0.250762782398918	0.876709086537977
2008001	17	0.74470089328376	0.990671183645738	0.152828217327584	0.237159054081963	0.436932678992251	0.586208416713728	0.297567989795817	0.317766725486569	0.386265252919131	0.310908973092373	0.612205698360881	0.515281336513252	0.14875683118682	0.128407367360806	0.138030402084538	0.365695045678742	0.248319666592341	0.256182045890932	0.885652708245372
2008001	18	0.746097528610084	0.940612836209546	0.141603690388634	0.234235341106489	0.548002012476053	0.543280976435218	0.270429846588902	0.318247959676106	0.429424043107238	0.280941896245719	0.655152444307581	0.476398075360769	0.159634283548812	0.132891337596137	0.129584968664531	0.384396660827408	0.216252159714451	0.247918287506931	0.830842483596411
2008001	19	0.755269616780629	0.886454121272456	0.136136236618451	0.228580901775409	0.548707987441209	0.475497620315466	0.249887333728588	0.353070117059901	0.441715348784271	0.255852651954066	0.742170959725654	0.429800983611496	0.168814062762845	0.136098990849693	0.0892680693489568	0.40019472617535	0.214877190405351	0.230955633171837	0.731103617859219
2008001	20	0.754426066364187	0.804274694046607	0.135178451966745	0.220982009404018	0.53620451382186	0.453520952944429	0.237825541384328	0.461980996637398	0.414207546993857	0.24592074590189	0.847917495954354	0.386216676000529	0.166894271340809	0.134636996123378	0.0463147516539256	0.390967276027194	0.22927722225139	0.222672440028175	0.62637141634511
2008001	21	0.744429114926661	0.690968802392978	0.13602706218526	0.217595998116365	0.531912208932091	0.425414807446381	0.254180251479192	0.595428888055858	0.46259423637015	0.206909519502445	0.914806096672273	0.344305604366128	0.171816684884531	0.131880584134271	0.0391797089063487	0.381067361105274	0.236643023938217	0.263012231399363	0.514499050802089
2008001	22	0.726199344048647	0.587249129888676	0.138719257638588	0.216999378170479	0.485961465979119	0.395151815553836	0.318595179455767	0.634867057703663	0.538700273067447	0.222141755573024	0.961784711735546	0.291141817022371	0.179097899056194	0.135034226403212	0.0421086890608217	0.368998835114116	0.251104322407112	0.33721648534654	0.490234205603887
2008001	23	0.69341442705776	0.516039475511298	0.14402421789666	0.214045633469619	0.393025308263829	0.36361591754473	0.336669546625865	0.593581295140536	0.577950175653263	0.237222797199449	0.930320237433076	0.24013942383652	0.22259206606174	0.145058192589426	0.0397592840705515	0.358160069440859	0.274659576768228	0.485035342278729	0.653795625372679
2008002	0	0.651311184644306	0.468270921053143	0.153807248714477	0.211688527416132	0.390499893225465	0.337950574831294	0.353665196499314	0.523652533008637	0.471724955632796	0.263655098860207	0.863559602042159	0.200633418388671	0.231691276260296	0.154901213728407	0.0341036146138333	0.35019480650544	0.36307991025318	0.40108221529867	0.751323059346177
2008002	1	0.603767081804286	0.429753160801846	0.16950999081785	0.214530239813313	0.379997008500476	0.311558266003721	0.413392707013341	0.43678749863313	0.372306119060448	0.303705460231665	0.851288573379234	0.18571072306671	0.228101208460311	0.163320421542482	0.0211113491894383	0.340989448289266	0.528733802801413	0.38322540956717	0.775942998750204
2008002	2	0.582735989356306	0.404341336016361	0.18990722824825	0.224524000587214	0.3715058359621	0.285818620372519	0.478862922680566	0.279288699066556	0.357590246848581	0.327753316747679	0.800585571978928	0.180899003204275	0.164422678077723	0.166428135750117	0.0107951971264532	0.324132932208088	0.607904749489286	0.417410214522131	0.740411444063185
2008002	3	0.617238848264653	0.384113316153216	0.212107467457683	0.260656987334904	0.364365038226138	0.258067070269243	0.496814537497171	0.177712376658718	0.347563625116737	0.376579517499892	0.742002835962856	0.161795158300651	0.185492120048873	0.163884284872858	0.00486342171864531	0.303211763003036	0.567823888907138	0.417531133998527	0.72357984469951
2008002	4	0.67433149966867	0.360751232152551	0.233196888435161	0.327953950312353	0.351044676690709	0.229068093981449	0.508371415558646	0.171867478387156	0.204522360979844	0.429923930368516	0.74222848922424	0.155206447168787	0.420231287012355	0.160457083071156	0.00390834018520872	0.282452168299416	0.362541322960476	0.377643876014447	0.746282799317929
2008002	5	0.714942084609587	0.33276434059157	0.250503893560273	0.352900897841859	0.382718267639441	0.212992619408838	0.478957559197479	0.285402346629618	0.326676260894955	0.444128322591818	0.718842436332582	0.142200525997446	0.881279118116594	0.156296259480162	0.0037766464027376	0.272691445392282	0.189238395822185	0.375753305279232	0.705697634294054
2008002	6	0.716255275854558	0.315502653284254	0.26553311911382	0.382236631481116	0.395722158257364	0.208974748481396	0.436477174859242	0.400037135758692	0.415638270884908	0.34035583798436	0.67523008526116	0.124414947915618	1.01815373231645	0.153282849707731	0.0048213754095338	0.263749079171479	0.130113309424225	0.390122005514829	0.677466020456854
2008002	7	0.693028762792339	0.327235870517337	0.278335053973459	0.361372955128759	0.379129686089533	0.206359039073758	0.404798463514577	0.392706222978627	0.404814662390822	0.411863468917407	0.652240464060928	0.110966568334255	0.582339398809326	0.152147727976389	0.0054106134163792	0.220997591757439	0.11204444937456	0.394215543156401	0.69760513460283
2008002	8	0.631870925782414	0.294849338161212	0.292178751985011	0.283781664615637	0.341325019724392	0.204769586037524	0.379027960904285	0.36795466897754	0.775892460908173	0.482087408767931	0.597489864892557	0.10577359427978	0.184618758501171	0.152422455279704	0.00628347791971583	0.155234245983717	0.115019377633432	0.388226750942399	0.740608636435489
2008002	9	0.559052126679223	0.263515071524227	0.41547473682037	0.246539861364801	0.356051208559249	0.212405226075669	0.365481660917586	0.394910365385386	0.904321545555884	0.440541599140346	0.573297153014006	0.103287571392228	0.304366911259821	0.151443507382591	0.00749700264712038	0.131106544088675	0.144815019332536	0.372114784858132	0.762953607012769
2008002	10	0.408964394712831	0.240132320126863	0.570574255467201	0.258105641358736	0.418060394632809	0.230325133787258	0.347906844751679	0.434209039156568	0.917634584783282	0.388890213753897	0.577850551830922	0.103181455547577	0.720172813777238	0.150392556169676	0.0079256114743719	0.150687929555321	0.15645938355813	0.41950710325448	0.819819039903458
2008002	11	0.348455028146508	0.216357651498982	0.60193907282416	0.256453152574991	0.559508133100186	0.247825472442102	0.328222616940851	0.435568918960988	0.77310916608633	0.349882907256964	0.582002690428987	0.107115673185601	1.02472642733451	0.12403876308815	0.0139001122956699	0.137046181220424	0.137252209347552	0.38376109483097	0.84954351711722
2008002	12	0.460156611082179	0.22003483492094	0.565212656493225	0.18925868166971	0.581918678230279	0.2655571514364	0.317119129117733	0.393508596629155	0.678906529619926	0.319416994599406	0.593975530316898	0.106762117566716	0.986797994294201	0.110228861947857	0.00823421525961757	0.0690787198266458	0.11090248136892	0.295450874282373	0.870216290420571
2008002	13	0.456258988041535	0.244082000479178	0.521458538228332	0.141130617750642	0.511585019944308	0.25567103364281	0.354907895970302	0.400384033595296	0.632251111310819	0.28849345022726	0.602597870033843	0.10595741296503	0.930588516494897	0.112830729794124	0.00432573270300988	0.0468388039929105	0.0776203391735489	0.254887013372855	0.822665459868773
2008002	14	0.504188519655687	0.24329265568164	0.477039260876096	0.0980020151823756	0.350394920811748	0.225529517332112	0.594678351159787	0.461171786768653	0.635077391184926	0.27295904673973	0.609970662098869	0.109226384529492	0.8431127955243	0.112596900082414	0.00229368798855848	0.0324566193706848	0.0553698773866696	0.283216774977365	0.763535948258835
2008002	15	0.553434554066259	0.232025033835107	0.436389109554014	0.0375805946165109	0.214654847765926	0.132269310246939	0.79936671819516	0.521270786959122	0.643832804332928	0.244925660659195	0.641757943295358	0.107187379354019	0.890035812310998	0.112294009021731	0.000986399431557327	0.0223405168094045	0.0394209879574769	0.246751134829441	0.673828289384824
2008002	16	0.556099884064384	0.229678661246644	0.403693448159054	0.0292507952829788	0.200452882937862	0.0371922739360916	0.836346633086902	0.689450729629165	0.601800565905161	0.256256061284221	0.685372401149334	0.104805379537358	0.977687394717793	0.0994551547211822	0.000388096678630776	0.0165068204705767	0.0309761738698185	0.183638309349661	0.566887807496958
2008002	17	0.541801969191424	0.208027493308926	0.35568016281396	0.0269088360739089	0.246386224132693	0.0225840961997528	0.829530597415082	0.514137879733236	0.609904006230179	0.443629047747705	0.738059340181908	0.109652981734767	0.979472216907622	0.0959845970802691	0.000119849503996259	0.0137126018197608	0.0228934340525139	0.166687171392861	0.50234288190812
2008002	18	0.556963048050782	0.126531820597767	0.325390321748678	0.0237226094386401	0.386147287936935	0.0277943523670036	0.780291355516726	0.422489284418208	0.616478607866753	0.619961944442806	0.767338415397553	0.111380366928081	0.97781990940633	0.100060555009461	1.94433828729967e-05	0.0114515184550885	0.0202075628471055	0.161158295053907	0.436292117620773
2008002	19	0.694819768346867	0.086159554398368	0.326350491578286	0.0232548887516604	0.554930055456288	0.0325614984301562	0.738561472015042	0.468476702101118	0.618399845905757	0.640136279462363	0.794995580156858	0.0809155370138461	1.05722205305934	0.0983812693843293	2.72950918518937e-06	0.00946299566815107	0.0221853908465687	0.154621218270286	0.368040759490267
2008002	20	0.830370825455284	0.0323789132302351	0.308222758545401	0.0293233859199037	0.497000919966654	0.0246785610905813	0.718637005695189	0.58831549010736	0.605220047817262	0.598669277521809	0.826319289844428	0.0648157690585465	0.912046259298038	0.0963066788526046	7.72168077060251e-07	0.00830535890141843	0.0222275045879592	0.143623566967337	0.292330291994384
2008002	21	0.826340493570613	0.0168668660293639	0.301568468050756	0.0331930498323042	0.444328703620533	0.0178611904853969	0.74629060177356	0.716484337035638	0.621687044145652	0.550382880382363	0.850416377307294	0.0685410696712054	0.879811346050152	0.0929018508479168	2.91558745532955e-07	0.00820026340204717	0.0232673420862815	0.137451449874402	0.255605276474934
2008002	22	0.740753937055526	0.0139388932572275	0.310925749729658	0.0202288721252837	0.408315747441971	0.0147946162513765	0.796102173847182	0.703268787846363	0.622534115130797	0.55509096243664	0.855439139308568	0.0731277392604553	0.93955037955583	0.0856824736798171	1.09935463044696e-07	0.00791932983152829	0.0269461051175816	0.104931062319894	0.260361084682962
2008002	23	0.692806377287886	0.0106337140731313	0.321473611581775	0.0066666086729055	0.372184898730751	0.0137008069806523	0.847937014640049	0.61949291019915	0.657464086793574	0.610944242406397	0.861346208600904	0.0673400597436335	0.965774970808965	0.0757806714219476	3.78037573123041e-08	0.00762259618068377	0.0286553353255195	0.169600797943443	0.257131617831537
2008003	0	0.673041229956899	0.00739826535602759	0.312933304050803	0.00661739596554966	0.365226571247547	0.0135063725832365	0.859632051897127	0.55157852310963	0.678042486353175	0.665341328899602	0.886566063947718	0.0559026823386872	0.965792808190534	0.0644753441582421	2.92141970963345e-08	0.00725513186358443	0.0272229904636949	0.189796515791267	0.214738118095827
2008003	1	0.768745081684748	0.0061860198330573	0.300860244790153	0.00939704156197973	0.349080177962579	0.0133351802736646	0.948962910920689	0.506892089478957	0.679138271498424	0.700194248549734	0.893816115548663	0.0535021332143947	1.01599980107319	0.0568442791861571	9.25582120099509e-08	0.00676572794562461	0.0235024764650982	0.188725310093974	0.180144242565285
2008003	2	0.831086326090702	0.00656790014570143	0.294062252870227	0.00659612923742841	0.316608271988419	0.00989874563170706	0.914038009313937	0.484413042542975	0.720725249781123	0.704775211759167	0.910242084733938	0.0589734675920967	1.07152697058807	0.0523202933072778	8.40288767765643e-06	0.00607554451161528	0.0196406459243604	0.251276437430564	0.187061063097231
2008003	3	0.926129022875148	0.0075233581093542	0.292823482489449	0.00388882806999488	0.271604392610027	0.00772384665718071	0.905950788548204	0.495717447775153	0.810732473268662	0.717149988759918	0.930504425022502	0.0679332289836045	1.0813503114936	0.0527055068974015	2.03353744664213e-05	0.00508703598691515	0.0175073856187255	0.135452819173401	0.303216062004011
2008003	4	0.952456756532541	0.00744748128829854	0.296027853930617	0.0024920007180323	0.274679468052771	0.0103058343013026	0.877343309358604	0.442721851824227	0.914110011564947	0.710830133790157	0.950195784355049	0.0839004242298247	1.07320710814575	0.0551879713470995	2.85126882418248e-05	0.00428799705349944	0.0193408158220713	0.206320836068342	0.330454176140768
2008003	5	0.890765527412346	0.00584124086204368	0.310241434601562	0.00158613268273282	0.314716443574956	0.0233907081935437	0.922015164834297	0.420787132932769	1.0017397542565	0.675919699513797	0.986149398070137	0.103008417471118	1.06895428376951	0.0587286559382823	7.51032063109883e-05	0.00391764150739193	0.0164051356447622	0.238070459903156	0.258886386423259
2008003	6	0.91236325409098	0.00488449073143134	0.291160441362272	0.000818485109270735	0.322698106558969	0.0304692286468437	0.968689954226653	0.443251109398512	1.07525812774608	0.690367227013386	1.06265725710432	0.126643041733517	1.05062535777407	0.0613733323187003	0.000268445776014918	0.00447636226979708	0.0141452331471471	0.274937094667916	0.209497704972899
2008003	7	1.01697155173645	0.00545483973194238	0.268224834446884	0.000387422692747241	0.338211022821745	0.0321569112412318	0.9927462826627	0.472030955238433	1.11599038819534	0.718153687388475	1.11739725513882	0.136395955815724	1.0690792908736	0.0636951227100597	0.00108548700423234	0.00862296368605022	0.0388913213308366	0.310257053319448	0.197118454364603
2008003	8	1.04251112150053	0.00738693382650443	0.275204423621311	0.00020633042120137	0.38121079704623	0.044040422989836	1.13415100782488	0.477338358082778	1.15928417825259	0.722710861125374	1.11293022058726	0.136597525838732	1.11360436579178	0.0686594153097043	0.00379082502959136	0.0199555314408619	0.0452537390765811	0.331311615074684	0.221753884781529
2008003	9	1.00405318690812	0.0209721085810616	0.301239736519616	0.000399000632222711	0.409712386654507	0.067740416459861	1.14212868648259	0.471218197870762	1.2227404428631	0.801748318313513	1.14622949519262	0.140540835414885	1.19617978069892	0.0755714784852156	0.00134706184956055	0.101417215794152	0.0529324846180799	0.356831179773111	0.257280515799909
2008003	10	1.04743807081135	0.0298255523265751	0.308314964513446	0.00157588988132278	0.402502892092326	0.0857306756158721	1.10723607927049	0.472517484177156	1.28715778356224	0.843085836302143	1.1548903773391	0.122659679502159	1.30491096243067	0.0840197979756896	0.000250031104067255	0.170497538270459	0.0532312114762547	0.399122407490871	0.282716441574809
2008003	11	1.08864583226523	0.0274543976018958	0.282867355321921	0.00613059817336077	0.382436575839132	0.086268433018896	1.05782674427665	0.470092465479251	1.40124259094786	0.785271271279845	1.09340266354997	0.107243180680954	1.36474750874318	0.0992588994585618	0.000316031055218214	0.112386032186109	0.0756012463186515	0.455802842085686	0.206296364575523
2008003	12	1.10101955205932	0.0351751917782559	0.249027280446719	0.0129340263337018	0.341918503977418	0.0831962378046873	1.03856019979847	0.446704364209676	1.54982812299125	0.745495058377226	1.05996730694374	0.1022895015882	1.40922278518252	0.119281686870572	0.000644000075098136	0.0825188258631712	0.0802508574756488	0.466457018309305	0.155257654376525
2008003	13	1.1276358064214	0.0396188194923537	0.230039277447786	0.0197466059145249	0.340112638515236	0.074385869136238	1.04177532311349	0.461447852855871	1.72874129531885	0.738580742369334	1.04063372740575	0.110409282820075	1.45719117480635	0.143142903560671	0.00557346281299482	0.0735822968581346	0.0882705973074538	0.491255949343498	0.130300970814231
2008003	14	1.09776380401803	0.0288246091878091	0.219290899050506	0.0308313357071353	0.327658970236932	0.0705521989190858	1.05811908487974	0.476066797430265	1.70158144889042	0.765285234899943	1.02247097384503	0.110981858445583	1.4843924595382	0.16284441335301	0.00878600869555286	0.0912473294671263	0.0870436215542229	0.522309792447746	0.106761456803525
2008003	15	1.07305607319783	0.0221201088344872	0.207396179615735	0.0339537964038012	0.328973316833099	0.0730217762258111	1.13711488178562	0.526351821465701	1.66196376154381	0.793275797081386	1.05960514655372	0.117585201819657	1.46749497849137	0.170287090309474	0.00381161937005558	0.0906877168349321	0.0867786154682719	0.504393361305304	0.101218193878943
2008003	16	1.18764279216841	0.0203600816621529	0.193198616190312	0.0627119160293954	0.396256027224051	0.0720273104086302	1.13931870912689	0.580522155652583	1.68736490735238	0.840383654159155	1.12419901867977	0.12530187968327	1.44063273990254	0.163548540098305	0.000242710080775657	0.0623661390608359	0.0889742191446859	0.543298236860646	0.105024870300754
2008003	17	1.32993729626763	0.0231991524073757	0.180964160805879	0.0429224495184736	0.450520144984857	0.075905521045242	1.21015670163567	0.663042284273273	1.74952297031815	0.852938252083251	1.12650059601139	0.118241008592144	1.40370485875745	0.154410550935325	2.20646075541016e-05	0.0296081546746696	0.0943126537405498	0.535386870938815	0.114866147159712
2008003	18	1.35395077090685	0.0290307728137824	0.170762728004136	0.0297606394406251	0.448211521629386	0.0892733253815664	1.08853964682383	0.728722667792005	1.86150249249171	0.912170121557552	1.09018407474933	0.0911738867943588	1.44186090339854	0.153503688779116	2.31992385372992e-05	0.022053431560965	0.0969862797082347	0.544957409632669	0.118197892348114
2008003	19	1.21946672535196	0.0347974589313758	0.162499302338734	0.0279707688451965	0.467594153987762	0.101522939355938	1.06648317542728	0.728374132218646	2.04678516392409	0.840951968411671	1.06207303617868	0.0729562606752447	1.52961307970034	0.156476317655512	7.30457673880872e-06	0.0230060954086881	0.0980606226180509	0.542219878152449	0.120474376092181
2008003	20	1.15642412534813	0.0525547024474604	0.156963695271182	0.0325235115983211	0.551931698142854	0.102429777638254	1.33994198302391	0.690002771313685	2.40664433349431	0.78406989139454	1.06125415501976	0.0733683090062264	1.66571771871178	0.16130254797666	7.48435749298045e-06	0.0300799807598471	0.0970018780256538	0.63108562869717	0.13824087562321
2008003	21	1.08556277813029	0.0675507890664666	0.156286683793731	0.0334416654114557	0.396150853605578	0.0994940591574605	1.43703730332043	0.681701381512428	2.52659959859273	0.913003930640466	1.0312660360225	0.0881452982557743	1.77565477939846	0.170693213853607	8.18497524501668e-06	0.0676303394638599	0.0881611733022492	0.764790631633443	0.186193642482536
2008003	22	1.04400078392971	0.0707328873064103	0.160563035403998	0.0329312926806737	0.318801288974233	0.0976599131021773	1.30549860975524	0.673570428492615	2.6175065400765	0.995367530049869	1.03534686519908	0.0720904181061231	1.8830494319326	0.178150844912711	9.3096811107473e-06	0.0851933473662641	0.0812579625455551	0.794194340060932	0.213843473998464
2008003	23	1.04602298453634	0.0717351775981773	0.167041029422293	0.0311604632462461	0.276618616571366	0.0963809200463331	1.34868480215852	0.544750481966228	2.50260138106251	0.895808375893316	1.03693929188662	0.0542942354593535	1.91251547180226	0.179197800332369	1.38064341280265e-05	0.0926405922313249	0.0768678664221548	0.846311694091796	0.221873857219029
2008004	0	0.968792445215378	0.0683021647867712	0.173522358716652	0.0280129632135366	0.254438496747253	0.0959150226701804	1.31656934319329	0.525790911058556	2.44004154628636	0.859690239537037	1.00385220881986	0.0550278394146598	1.95875494039673	0.184016092894171	8.02980549850396e-06	0.0891874078433032	0.0728419271373466	0.841643870760581	0.221122794328165
2008004	1	0.884305568705842	0.0625796334157537	0.178507648315652	0.0268953191957688	0.26520685101021	0.0956566397767984	1.28805203590902	0.518614789422825	2.47606244751443	0.784474742140511	0.983240467717157	0.0544336853337121	1.96809261234614	0.190228167411261	6.62889316425288e-06	0.0834237363345065	0.0698698193227173	0.793805075127241	0.213493501871408
2008004	2	0.831651749011583	0.0563155536669507	0.1843996856901	0.0283338609854996	0.285312169694179	0.0983272387818316	1.27072307650154	0.535368612483651	2.6213891752428	0.733089069537558	0.999895863130422	0.0476115678356629	2.07020429169226	0.186676854911516	1.08846172496997e-05	0.0659041596924666	0.0688844208192853	0.816870003424548	0.20972434454603
2008004	3	0.845395852585392	0.0578742163624949	0.193303592028081	0.0303685502357726	0.297379909387793	0.102286012570231	1.32711002592908	0.572664549783282	2.77458258469941	0.703265026970296	1.00615561224904	0.0467582303957709	2.16314004440518	0.182208997439988	7.29703456521466e-06	0.061800124407002	0.067421220442907	0.835914584881454	0.21108270345329
2008004	4	0.868860847053621	0.0623942349380637	0.200106399623935	0.033592623429261	0.28545443366962	0.10312161319013	1.40953367386289	0.611180403250083	2.71511069381164	0.744137855653149	0.995485367384226	0.0497105248815457	2.3632246944834	0.180885412408931	2.51580241598432e-06	0.0571328011859566	0.0667916666472764	0.843249603462326	0.246267548612848
2008004	5	0.922223450553451	0.0664954081465684	0.203841974214287	0.0342438738154284	0.256265481433747	0.0987734520863363	1.55396224941724	0.622919149348309	2.53654470843625	0.79535870446651	1.07413910831226	0.0498270897371436	2.54088087864681	0.180305892724172	3.83122185033376e-06	0.0547453607320319	0.0658621881048937	0.812764940750882	0.281323710642678
2008004	6	0.927185099401506	0.0682761990851079	0.20871379135955	0.0343762023794322	0.221523182676608	0.0860494222750117	1.59243833350433	0.623349207334444	2.54364718046133	0.798565408251293	1.10706228008843	0.0493822843462574	2.67394582627295	0.179302268544532	7.30122958540934e-06	0.052062512455569	0.0693898699613412	0.780389347222085	0.255787325270063
2008004	7	0.933953453893252	0.069682540933539	0.212515114785411	0.0352203013951308	0.20793836619191	0.0781258461122953	1.58228995925831	0.638675577721536	2.60680704524564	0.751927334237318	1.11216742741273	0.0497572587769803	2.80610014064512	0.172593541310481	1.12583746600635e-05	0.0540613444879256	0.0753741694489187	0.786412536027788	0.229268357194927
2008004	8	0.943028631446056	0.0689905038976829	0.215587449871347	0.0387718086821027	0.223773320212994	0.075620881473871	1.58848013168741	0.625862942701395	2.74414240434989	0.72367643062557	1.09406110086002	0.0492516401023839	2.96605079867118	0.163576561423908	0.000109669882825073	0.0771243503539673	0.0806400654011766	0.778783007091113	0.220955072076137
2008004	9	0.928134986597028	0.0712639739360079	0.240442708896259	0.0416402596846651	0.264607151954601	0.10257528844311	1.52998229311453	0.641901139720643	2.82597223897035	0.69913408572731	1.05072603884709	0.0474680146593773	3.09200957410098	0.156300832853195	0.000129374227336165	0.100790742224346	0.0804324627416097	0.776895676064715	0.227502156568869
2008004	10	0.939568173081978	0.0743270589527043	0.252761845041389	0.0434888717675316	0.320481551972494	0.103465260044483	1.49433085604053	0.61246727710804	2.81818757430898	0.633071347261718	1.01464879402143	0.0463205068456483	3.15415227011018	0.155771615450874	3.78198403009543e-05	0.115368915063726	0.0796735868827602	0.7520077859639	0.246536979661797
2008004	11	0.9733492944794	0.0729846483648581	0.288099618340623	0.0409542384337893	0.346640874463611	0.101283380364874	1.51429483733619	0.597706283800533	2.86165947614059	0.597483457217075	1.02759360833988	0.0450077874349734	3.10794323761664	0.154856689692124	2.68634820901201e-05	0.112137153977056	0.070045943701826	0.779502150189135	0.277728213855244
2008004	12	1.04838829844851	0.0685836313690402	0.27028649110835	0.0381140629817071	0.306583046010623	0.0970789831483395	1.47906606322433	0.57516683555601	2.86086768716536	0.572942971715542	1.03318237500645	0.0435503690008529	3.17127756104491	0.153972012622935	1.95069063149315e-05	0.112332426637988	0.0671822782125471	0.816665533291039	0.349397948601593
2008004	13	1.11054958307975	0.0641686989971821	0.246922172808616	0.0349316050567334	0.275793678563936	0.0899719501816809	1.42289022730556	0.560408008235276	2.74077846959035	0.555258441577501	1.02665217925504	0.04326069985983	3.34419608460674	0.159725418110215	8.44158941961456e-05	0.112216761025735	0.0666165092386626	0.824142328245246	0.371706577797162
2008004	14	1.12357384704432	0.0605016981554676	0.221613004044908	0.0368851060321278	0.26280728541252	0.0896952948217762	1.45006047123267	0.570454263624408	2.64258186774116	0.554573154227842	1.03584384341698	0.0438844158738924	3.40853746526349	0.161959856075261	9.55732833011368e-05	0.124302187353203	0.0718404580428697	0.836072360043022	0.319629707180109
2008004	15	1.13948548417714	0.0570660656057785	0.197922190174427	0.0411634311863511	0.293170027985712	0.0861564738746705	1.46382419856685	0.597525806048592	2.58563548841153	0.561444253169507	1.06833413253703	0.0442814976192022	3.45579881246005	0.16881558940348	2.89385390765467e-05	0.122608674265142	0.081491198252986	0.825516324380636	0.314897335299857
2008004	16	1.12027087486101	0.0527118592801994	0.179540504605018	0.0432963541517276	0.32114470570991	0.0736380164281262	1.41892175732469	0.627741898245356	2.58295714082747	0.569448280665172	1.11112154152779	0.0457418607578392	3.51581700127119	0.176386279126053	4.11916934917892e-05	0.0974105666282313	0.0981950902528065	0.832332821546514	0.336427698980613
2008004	17	1.20109378438353	0.0485692949137571	0.16979523184649	0.0426447528342246	0.330083866455753	0.0629929583932796	1.3968584927706	0.642634941354573	2.52403643567943	0.540920865047544	1.19866426372129	0.0440363874550475	3.46805685724629	0.186567665281503	5.64023949111171e-05	0.100401727395539	0.0939336997860328	0.856201631572642	0.276154689011172
2008004	18	1.27077794456233	0.0454052966341631	0.164247188991075	0.042069772652007	0.273980513919848	0.0620710832183983	1.41958953708957	0.653560038855689	2.51832755141379	0.517959762637253	1.27737084699379	0.0395089109235536	3.50928534031289	0.202320768992808	2.81686874493738e-05	0.107279759946972	0.107124649684642	0.895272771362297	0.191780764972839
2008004	19	1.32287738016787	0.0442955933375774	0.167205825978248	0.0432743148738975	0.214958817081872	0.0616054897020865	1.28846296678306	0.660162758135431	2.66304442488726	0.515952054350727	1.3144831833466	0.0352227675688843	3.74366231788098	0.226942820262264	6.16157843009097e-05	0.116589435755656	0.132720884158125	0.942773421412184	0.151308561124671
2008004	20	1.38766112268874	0.0457070826862419	0.166133912096213	0.0513998322521193	0.203907055825722	0.0575029690793543	1.17495914795075	0.663963711183604	2.77195966180425	0.479948022643392	1.321173085962	0.0368795297762446	3.97179809506708	0.253532021196297	0.00011228839412932	0.127725078999764	0.161694751186985	1.03623764449321	0.126176382159505
2008004	21	1.47184352605394	0.0426184902509077	0.155010538700151	0.0587371937005029	0.202049543141086	0.0525957390425639	1.09819130994254	0.631909423507145	2.70017737140362	0.457095214833315	1.37194207473492	0.0410326155007752	3.96114797217323	0.26937796808752	0.000193069404871331	0.108107240361869	0.167151339504901	1.06801363960821	0.113713395928593
2008004	22	1.58814727345542	0.0424916017440929	0.141192523115806	0.0641230049371197	0.177062108331311	0.0514079888462121	0.996804860608889	0.629994396853747	2.58550711816913	0.468556268007201	1.41135507786487	0.0422150120825052	3.98778852443746	0.269907185930534	0.000420880513506399	0.106296022383436	0.146119283605222	1.07419105730488	0.094525900161888
2008004	23	1.56397608293399	0.0531959611267531	0.134109511168899	0.0553609536556122	0.182046035897366	0.0542134658892437	0.920289996652267	0.612656737099907	2.52338821751651	0.446912482759097	1.47166178875215	0.0425749030101344	4.10237139035982	0.267161774578439	0.000653390952915278	0.112362954629808	0.149623045300142	1.04307027587452	0.0907619807288858
2008005	0	1.56979812824823	0.0750136830936236	0.131850485340894	0.052359436623369	0.177205153436007	0.057728027876652	0.878479944728829	0.623991120251764	2.47816959903348	0.427968067109024	1.50564247426942	0.0438343161404335	4.17558815881017	0.272713233193317	0.00139180073077297	0.127389649525332	0.155407764048878	1.0488409407155	0.149391859733246
2008005	1	1.69736013067851	0.102921995038351	0.130795841237583	0.0542373932204878	0.189703148168511	0.0619811987803127	0.899660778778849	0.728473116712038	2.45833447920517	0.416188247533489	1.48391541216272	0.0455457267654785	4.19128403884245	0.29033123714221	0.00267789334048492	0.149681779827445	0.169786339345711	1.03268750717269	0.156125966102686
2008005	2	2.00983072866848	0.132354774018587	0.127085368993378	0.0710627441468807	0.229927755320783	0.116691201532754	0.965527769687962	0.747961907624257	2.61294270888143	0.401472048517343	1.45651528189219	0.0448192286971114	4.20394388631427	0.320358661863509	0.00448191336001844	0.162665710682471	0.178529808656172	1.03247098179826	0.11569837416499
2008005	3	2.20103556882264	0.148906387550742	0.12141053989916	0.0749267280624753	0.24916880873785	0.144966731925241	0.955510906915472	0.744430795658202	2.73119421168279	0.42022970575266	1.44598660927838	0.0505171977536462	4.29979990242359	0.356397665984286	0.00701281505940128	0.167420428558626	0.220195409255448	1.04517667570655	0.0789476185074253
2008005	4	2.59256052284844	0.165827717374021	0.120152948285344	0.0800226606479722	0.24306962312515	0.149464782631588	0.864447864398543	0.705268494102752	2.731288166526	0.433611397625771	1.4466599257207	0.0529762045721562	4.49365345941672	0.380477212895205	0.0110683011834054	0.166626023929589	0.285510793483829	1.03837105660978	0.0484222584421207
2008005	5	2.93754990596151	0.284436764173549	0.117085930633775	0.0834739701503341	0.239794149945836	0.147415999485694	0.827866707443308	0.675769937247769	2.64607227195866	0.406054873944136	1.38895417667934	0.0547962991495207	4.60901433563237	0.377190822712551	0.0187345987604974	0.178162036325082	0.320195917276291	1.0740435660353	0.0231566323983411
2008005	6	2.97362052147765	0.363823965375014	0.114319241084077	0.0867775854675878	0.246243654080877	0.146855487492281	0.876136031281651	0.709947803296701	2.63598947814931	0.354199557412832	1.45796705528579	0.0581186039844472	4.55281641202315	0.370549539768548	0.0269782004483954	0.17266170273183	0.347317391279293	1.07955675595308	0.0120207318304227
2008005	7	2.69828646814968	0.396090972444496	0.119876728949837	0.0935094846877963	0.225543882499374	0.145359979062989	0.949591443011882	0.751209042075457	2.79388144238479	0.325335739777729	1.53887660520953	0.0673624388688513	4.59649086008245	0.367449670650656	0.0320899957380246	0.152839615770486	0.346605913580556	1.1501472033639	0.0158429679847589
2008005	8	2.80930071343755	0.399817507690016	0.121411494559883	0.0952708984676927	0.21639219629672	0.151144449289752	0.98470914418956	0.795718528723312	3.11726847081515	0.307277125036928	1.64550381079965	0.0914863247450117	4.70911035980173	0.359042718661096	0.0584262898217941	0.133861725288483	0.327115507724544	1.17810433261199	0.173647736657775
2008005	9	3.04934709002948	0.320609912088052	0.110121162921487	0.0917687075108765	0.222415893491718	0.150815122883395	1.01053646970369	0.83568372433388	3.37977568820311	0.291745298093434	1.73227477060296	0.0785637391559451	5.05994001789808	0.362415757988242	0.0690432829730017	0.206940009071188	0.311441099913747	1.231124563254	0.771087174671536
2008005	10	3.52706647628024	0.217553893502109	0.170511543847613	0.0909726241250819	0.211763368581856	0.136438049987824	1.04702900282323	0.880296114305018	3.35241089322672	0.281850800172766	1.79126113591024	0.0565085226154706	5.79212485879142	0.38279158399667	0.0746471855840099	0.235828662469509	0.299213485295707	1.42484234755653	1.16824483870689
2008005	11	3.25366876869448	0.211863406512828	0.250029634726272	0.0947914236075105	0.220067381787505	0.130929452918912	1.03877818940985	0.928648557209179	3.26099090811009	0.261652749726663	1.84427480730623	0.0556986494268414	6.23589494155157	0.389309459837997	0.0787949096325818	0.209192642858994	0.279851878070708	1.42697099942496	1.80931770597171
2008005	12	3.03627686751161	0.257877971682002	0.20475619768848	0.117709710558953	0.236538654875803	0.138224674874925	0.99368168110138	0.884992382205703	3.37976165770598	0.248780133537574	1.88711888681626	0.0584484315240305	6.42782392473679	0.382860458950923	0.0547659362031941	0.170426289610676	0.268665107808093	1.32453427963605	2.88159208771325
2008005	13	3.03105352855358	0.159583395869738	0.132677889841261	0.119550067794943	0.261571047649248	0.134418725291645	0.92010064659069	0.722405431753136	3.50289160563947	0.275862433801403	1.90465322077057	0.0633123248907879	6.64877881870654	0.376808242319293	0.0456589077922127	0.14114871185732	0.252038479504824	1.2702719651773	4.07019538057876
2008005	14	4.67400988408714	0.149320419986462	0.100659961872559	0.11751118618048	0.282132844727977	0.141766315696818	0.78172826597241	0.515619547946614	3.58897095607031	0.392142813939922	1.93047097980068	0.0842553166220076	6.56836506193002	0.36845544663257	0.0374722941131969	0.160628171998817	0.224824425612752	1.31700566615245	4.26095697842037
2008005	15	5.31818404433831	0.112383853108939	0.0628687674988369	0.133489532025132	0.335890497828021	0.169447488557037	0.58935266610654	0.479554585779282	3.68964904787267	0.417902144649665	1.93303437943019	0.0929250026185898	6.52173290314352	0.353308696174951	0.0313952433363507	0.122945054839284	0.19725147380321	1.41745423105736	2.5424808928918
2008005	16	5.14135527118577	0.0737203999239394	0.0513844237555545	0.108196082444877	0.278993354751399	0.224639813350249	0.44107708294386	0.543763927443733	3.83857666270433	0.347752203841238	1.9396942100584	0.0898302301770799	6.05529472525816	0.334592552106479	0.0280203772819267	0.132396853676104	0.154792488503729	1.56561027675577	1.41373541336569
2008005	17	5.13302622055362	0.0633860519420505	0.0360879989061011	0.12440160455814	0.215468516512234	0.176991425365648	0.288474979796385	0.589827143598732	3.90051561584103	0.679303946035397	1.98943281481206	0.100809214026308	5.29468159494891	0.315366289768092	0.0320706022763195	0.124979725568305	0.140215909301469	1.72653566310385	1.04808966795928
2008005	18	5.5803999828354	0.0952584343386181	0.0237634006955818	0.135576744371319	0.159287770061277	0.104693963946868	0.226235727702289	0.986021742765689	3.87164600792275	0.49952728318245	2.11015844256663	0.133725332435013	4.74390165750037	0.304166534127227	0.0370334462719693	0.122465119924605	0.140237912797829	1.87351972622067	1.01941806534596
2008005	19	6.24583559920126	0.169249487968952	0.0191851503243097	0.116562936017498	0.147437564229924	0.0715955752415597	0.163194464316145	1.87893323185562	3.49599043314082	0.337015489335887	2.17390221207007	0.154808631632521	4.29077316277799	0.291575626815892	0.0444397117684524	0.117765079390721	0.138530366553984	1.99108119073921	1.39301078308788
2008005	20	6.6421636718095	0.244203521351768	0.0119955023814837	0.0831601156030957	0.139276885978152	0.0635073403905909	0.230360921360694	2.83278992719102	2.85423776204632	0.476088256155535	2.24044196156006	0.158341300010674	3.7905314182831	0.273444064600017	0.0608735021557185	0.10977693617378	0.146232243007574	1.9806819897844	1.75576145973706
2008005	21	6.00614300084672	0.26025994535678	0.00641277724717633	0.0669513524335275	0.173725914469843	0.0624020546523233	0.524442411997137	3.49896920988043	2.39205706693429	1.36064222163492	2.33674345888904	0.175013522325561	3.10395895548741	0.261288606423599	0.0642156820608223	0.10956968709007	0.161654956649487	2.01926227153252	1.65987520037985
2008005	22	5.69096592705288	0.266355917741341	0.00528386442602932	0.0609108784200242	0.291421842553581	0.0631709192192156	0.850288925223227	3.75165372977415	1.8399114084296	2.35835107825612	2.36154545489245	0.193475202360769	2.35981316276519	0.261158704518207	0.0751656342728314	0.0967565299609938	0.165441422796723	2.38776854987687	1.22057949369991
2008005	23	6.92118895712585	0.271987508271443	0.00636157475437709	0.0599273459102904	0.504423510670965	0.0630188178909435	1.07175555283844	3.69197719625361	1.73063070667865	2.70257932055618	2.42876576690672	0.21041967307069	1.85086452907083	0.263246880472169	0.0739731309848728	0.0902799223638546	0.174930997194055	2.52481420988174	0.909127363699796
2008006	0	7.46578959245872	0.28732191652747	0.00860903301303267	0.0599046303219749	0.607403966562936	0.0638519073376027	1.19166744066066	3.32664480996752	2.17635029849135	2.0488150235068	2.47922522030721	0.233095742203176	1.26084373772851	0.268298949618038	0.0709589375674344	0.0906007676012199	0.124666220129853	2.22730572445941	0.832672010935511
2008006	1	7.28502723395629	0.314850919310365	0.0159394872264863	0.0577788636148048	0.784774983481435	0.0696682634947921	1.18680798249774	2.49163704044983	3.71724541003185	1.24371029493843	2.53583180346699	0.259414269265283	0.946372643501766	0.271887293809612	0.0589171827588236	0.101091026607119	0.118816411392507	1.96013907148456	0.816184753788851
2008006	2	6.96835461243024	0.321428917939674	0.0115251354831405	0.0562497600091268	0.799913117153422	0.0779228030231191	1.12603854097159	2.01908735866973	3.75015595341942	1.55287120690756	2.54698696430806	0.300764321571787	0.748328250502251	0.263565918461592	0.052665670355487	0.0950575265811762	0.106567352474882	2.00495964626211	0.806945709863521
2008006	3	5.45981293598222	0.295485370408902	0.00611414350025302	0.0589439483706745	0.588977083685718	0.0836143691641105	1.10702838198966	2.08130027904857	4.20953181444453	2.77593960135685	2.54016033156747	0.310158178854819	0.563192278607576	0.245111858735734	0.0531989904674646	0.0911415644538238	0.0933276578226058	2.92601677691754	0.79528291779433
2008006	4	3.24697638048666	0.267517299365054	0.00566237321738828	0.064000834425866	0.447537489447806	0.0913869894786505	1.23303177838278	2.2787153305707	3.09177086167468	3.18850892027249	2.68929110912048	0.310499333136516	0.409344213982458	0.225298388420313	0.0582839508856052	0.0981302055279866	0.079103809005641	3.92687869427402	0.797087409273601
2008006	5	3.30623197692714	0.245131498138051	0.00761525275785577	0.066338183070954	0.412441196822921	0.101478213405795	1.46840989674368	2.42173950891489	2.86342065121288	4.04438389530991	2.72075634310411	0.324359758448509	0.338481015211303	0.205769451195537	0.0613502872436678	0.0758102345345769	0.0750407484134409	3.67613064323022	0.698496506934125
2008006	6	3.22759119875765	0.226069980624465	0.00616230259655797	0.0673224672116927	0.416625502487161	0.115383382101781	1.70466532137961	2.2881717972727	3.34820391065311	2.40752359315999	2.59498498216786	0.337418229276968	0.261724807219785	0.192035711838477	0.0633775125146208	0.0822517380454832	0.0805779305558345	2.06488056185383	0.663000558660759
2008006	7	2.95217353815786	0.201111171117247	0.00470829331337377	0.0648101985648461	0.428496527900295	0.130938205713863	1.80093855808156	2.20821258598577	4.14365643104344	1.3000199591511	2.50344108795076	0.363084053875934	0.18292300379258	0.183866112290449	0.0693410462545738	0.0873575420797992	0.0894862806325518	1.92907783444824	0.778859854915291
2008006	8	2.72364634343282	0.181335551726349	0.00436739131346362	0.0608282004386466	0.438849533769691	0.150166557109179	1.44506018677177	2.02605651051444	5.13331074865015	1.19559974120095	2.45346450242649	0.362174790547634	0.151754876405198	0.180768054806001	0.074472433494052	0.12108853508112	0.1102652914416	4.75044843153786	1.24971465362646
2008006	9	2.75237609483645	0.168683441235158	0.00447096423448481	0.0561730093084179	0.443406363388625	0.150639795819884	1.10081606648004	1.86871099141749	5.53770097826034	1.30437392139653	2.39526184289797	0.360978521410533	0.140605649674225	0.177892640168086	0.0974209954703592	0.131748726831695	0.102982142711397	5.52339700061108	1.12168855089821
2008006	10	3.12987270557381	0.159189430082182	0.00465161311757667	0.0514849329152826	0.487779601170256	0.134634356353477	0.907484547445214	1.76215702953316	5.32382208461867	1.67700783376986	2.26791999110119	0.351537651252179	0.143726276957137	0.176322426955266	0.0921557613734538	0.110547310098346	0.100662047799149	5.51094819614911	0.858792126837456
2008006	11	4.25389600163287	0.166243609464133	0.00532453368642208	0.0484064946291315	0.540464647086203	0.104875474953189	0.78855272381317	1.65417825821492	4.34491383300992	1.89986544212921	2.09543530311881	0.356598868937124	0.144827363565689	0.172514020456107	0.070812190277686	0.101896125482854	0.0841062962723223	4.79301377160482	1.67680445435583
2008006	12	5.44165548818948	0.34561314013188	0.01471739917825	0.0463501011866387	0.579623785396783	0.0750559407491519	0.727582562947645	1.53660644926564	2.96219114150153	2.13420967005699	1.96959351639662	0.357365479447317	0.150713889478726	0.167844615780715	0.0563253853507019	0.147607796327356	0.0808540572412345	3.90357179634586	1.54425723027709
2008006	13	6.06342079501013	0.694054097496128	0.0229304686127479	0.0449992504589042	0.626907981697649	0.0588931661631698	0.688099751878198	1.41106343308403	2.15096218974711	2.54923112538553	1.84360391630027	0.359965484332211	0.165255698796861	0.164164351241202	0.0462168356987659	0.123069926058855	0.0788535747869622	2.80672057834454	1.5379293357363
2008006	14	6.29321723233499	0.574808723076657	0.022328782048559	0.0444437642980029	0.662319762115376	0.062037078826698	0.663067277441753	1.28061205278809	1.85415214532949	2.72534272901057	1.695445211201	0.360756638144116	0.193624498643108	0.162015689717923	0.0249924079307603	0.0975241897230599	0.0770857120671967	2.28818652283749	1.60169274912619
2008006	15	6.21447780406734	0.429350806722939	0.0228247468647984	0.045505427409468	0.673119586405685	0.0719852559494532	0.6515716345916	1.22982521402645	1.67091661471971	2.65671446299599	1.51551601360386	0.39470733353765	0.319372449678681	0.161725759484215	0.0203003264770275	0.096615614757449	0.0753073529574216	2.29262039670001	1.54207231361389
2008006	16	5.98898322795532	0.389152828637659	0.0214136445245613	0.050505187268473	0.786862985539163	0.0650651990539093	0.693170688967867	1.17933524838266	1.61783553744018	2.40200371876335	1.31988778287349	0.421845971266276	0.647951381054745	0.163083035969388	0.0402705238640003	0.0974725625324367	0.073141625065548	2.35439719351017	0.685654069915843
2008006	17	5.52664469136086	0.366954002837984	0.019003915309071	0.075702874533686	0.804440628935259	0.0518014262620347	0.790300276695062	1.10123711484594	2.22492432068767	2.05033436363633	1.16255488779842	0.431773488582269	1.20549227981756	0.164994658105813	0.0521893727373208	0.091134159292827	0.0707722165869587	2.6749946873799	0.552991672839048
2008006	18	4.83131041975519	0.353192523333025	0.0175825746691414	0.151979254994624	0.803688029957133	0.0678477532948608	0.94352030742809	1.34760081398375	2.654618936906	1.80342129389435	1.05084028704899	0.437621457526567	1.39684266347381	0.16658672892616	0.0541038242315524	0.0870690313742639	0.0690225533875734	2.99380547439438	0.452792571552298
2008006	19	4.10890974439808	0.355071906621477	0.0166056249260077	0.327115522215643	0.88356111986534	0.145806377814522	1.12012606165057	1.78754751052826	2.72811921755512	1.72410166988793	0.954595073607427	0.439334602910745	1.22216307322708	0.167251729915984	0.0578578327225834	0.0833510001743843	0.0691566668461977	3.34297120470152	0.393904489333225
2008006	20	3.6770602925126	0.367613081539986	0.0154122107239601	0.55329742536484	0.923135821159278	0.233681039014143	1.20561693594358	2.06850273544137	3.12559837900864	1.60427700088715	0.908833585336949	0.436116189212481	0.90491049496841	0.16653799792158	0.0603533289988267	0.0752210307349568	0.0711869658799046	3.54453239113122	0.344678026428185
2008006	21	3.58297715078896	0.392066021634388	0.0164267737430053	1.07366344961397	0.925625874903785	0.261572603592573	1.16009982350712	2.38719857316712	3.65850425724288	1.56965068344008	0.843714923052895	0.410597448706604	0.527669367159495	0.164946682199243	0.056185663672867	0.0578245005973513	0.177888541467787	3.64303422050024	0.304971212651388
2008006	22	3.63459692670328	0.380817979513214	0.0158821543018362	1.26612834459453	0.895645261932337	0.261400779070106	1.11069300396555	2.07170332353505	4.05283307596363	1.54216551728762	0.72184303974361	0.398528737642334	0.318466933653432	0.194338398800172	0.0489185127804668	0.0708836900187867	0.347154569272681	3.59469674528978	0.274342114137369
2008006	23	3.65396323907814	0.349072445053165	0.00990071153520168	0.895608099244013	0.986020013805314	0.244630667101075	1.09353058958092	1.53367153270352	3.66454996875805	1.50972743082952	0.562972378228026	0.419751309848114	0.23082973031891	0.343848206880791	0.0414988596393333	0.137316155391429	0.759901545605412	3.54933366710121	0.258129731289954
2008007	0	3.68416239992341	0.520386899571953	0.00578780760391432	0.621366846142529	1.07008878243023	0.236509529799343	1.09133564893948	1.22679227715819	3.35629001627004	1.51727635442939	0.447558203994024	0.441490975351661	0.196436009564137	0.503674195458151	0.0402932421297714	0.147727011025901	0.900073343527803	3.6758250140705	0.251483363843233
2008007	1	4.06325445326869	0.614539610563109	0.00425681819211208	0.502557544813268	1.51754751665293	0.237738516233806	1.08063398329975	1.13759633068587	3.36508738113147	1.46231269216297	0.392027125089776	0.400228950626776	0.18391575559974	0.546760978735995	0.0465079445396916	0.228823413370822	0.845551762725797	3.70110040391613	0.25522898588585
2008007	2	4.48199563252232	0.642912784214977	0.00432505950003782	0.392850757805886	2.09171383106806	0.243503060272435	1.0746840779133	1.10806771264691	3.26770769581549	1.38843793329186	0.367312512557487	0.390036529201652	0.332852005752119	0.548164815324712	0.064450007611394	0.247709957688676	0.685571646048858	3.77495014011552	0.457285871160324
2008007	3	4.24693289293216	0.518632163629563	0.00638278877587586	0.347793754162635	2.2220559139268	0.246542523920927	1.07543180139945	1.05519538460331	2.64831449788704	1.32176455316203	0.342364155260052	0.381668460605478	0.837350009919732	0.525328375613705	0.0753697404326487	0.242964433015417	0.5358600688758	3.53007570280494	0.389839586807305
2008007	4	3.42735079329125	0.378976596461631	0.00640329850434633	0.328054273090636	1.75402488595457	0.2377551812271	1.06365191473809	1.02496912496452	2.58393107667172	1.24591537019245	0.31341518061994	0.363805951645424	0.905402398461747	0.49145878886063	0.0771584697417703	0.259417409854309	0.457087925605027	3.10104128507084	0.26192938598891
2008007	5	3.19625108758424	0.267393742126948	0.00369664559944548	0.682252454306949	0.875709993820539	0.248970487469889	1.03184086889469	1.05435975616814	2.8505740892986	1.20936428813182	0.28430375758028	0.348926226517161	1.08851319718476	0.468366693926826	0.0696250070121976	0.28139447368335	0.478534236070991	2.68084503904304	0.0930444100703092
2008007	6	3.00549853774488	0.229011136478659	0.133533303602131	0.827380159784384	0.709762293608742	0.310490757670122	1.01978494615795	1.19187262380081	2.90196033147896	1.44314017853813	0.264249921829553	0.338561172433612	1.12313367814279	0.470048932049514	0.0621326065916263	0.361038303978944	0.651841996144433	2.56705176002623	0.016509863605673
2008007	7	2.80119247987096	0.251505113087587	0.230931169158498	1.02730037039861	0.781554964677176	0.442723889530482	0.971824351820407	0.922680849042989	2.42316253511532	1.44904044826514	0.255362743025201	0.33040308040931	0.99441696204282	0.462792668811662	0.0601539666595632	0.365381317668541	1.02839017366817	3.03435537022521	0.0330936099623693
2008007	8	2.65975624379618	0.270484232224736	0.663051277202886	0.982886830630055	1.07402273048238	0.421315644727068	0.762879628992174	0.829600666106614	2.36764754839612	1.11515659849394	0.252026720506851	0.336208946456607	0.885642476838518	0.428824800427601	0.0616317842951481	1.04791298040904	1.15798130199192	3.72656393748416	1.52478156669727
2008007	9	1.96734725022024	0.335959316807098	0.718521573168098	0.607399299932927	1.0390564514108	0.809874914982039	0.656940821012625	0.763973363428657	2.50893866790966	1.0901714349436	0.250821670293591	0.340268645758945	1.7089981209648	0.572347927305354	0.0706398451536596	1.11961274245924	0.959593184150374	3.94876300756781	3.06981510361155
2008007	10	1.50765665516951	0.255331116270778	0.361105164087647	0.410654316967425	0.9078359626589	0.779455788112378	0.82438659903601	0.708053910372094	2.82722703186554	0.82263115313848	0.248696591385935	0.333925785811337	0.536389638027721	0.89550059489618	0.0860888266611116	1.01730452739041	0.727604706628302	3.1065571627332	4.71811872637609
2008007	11	0.746472290648087	0.0727891163221449	0.234153194689114	0.500250949461277	0.910806719913802	0.462935470133709	0.867695961004173	0.660772629141207	3.06214521775792	0.566151029204185	0.246350106657618	0.327674873944259	0.255439736261592	0.714205317235913	0.0928501537628312	0.997636742298651	0.627441891246514	2.91582512768764	5.25945035342254
2008007	12	0.484785244028915	0.356813408862415	0.630256690871897	0.461319812942759	0.523944425045693	0.0737934979128331	0.941944507147432	0.734831592892948	2.97147461688083	0.392723624759231	0.24636037039438	0.328102580329559	0.752173175246302	0.726126383019654	0.106311936475015	1.02116846016124	0.68594427470603	3.05059855096345	6.07828410298202
2008007	13	0.393058003379183	0.305554603804673	0.999357052922307	0.292088906669789	0.397265933640983	0.338105474210339	0.824954520204608	0.704419264525262	2.76236353568095	0.391108726966914	0.248875777613196	0.339245644274964	1.57703869992381	0.779320839961359	0.133969965711826	0.789483129163941	0.732392713827739	3.23383277961172	7.04757293722083
2008007	14	0.360502904589791	0.636018272966437	0.706101683126812	0.149009241116585	0.478395703723323	1.78276646844469	0.649548875188361	0.632304081397624	2.64938621739112	0.497440982361128	0.248631669368336	0.352108987069876	1.7063101813986	0.981491977131784	0.156783824376971	0.361268125269268	0.895115221727192	2.89814636195168	6.08528847127438
2008007	15	0.379497665056438	0.376111257814093	0.517957271182689	0.457390960278267	0.375279135987143	1.5489569901382	0.601983036174013	0.767783587891199	2.50509717064992	0.458984178885895	0.242576661209293	0.367474227543525	1.45790967422054	1.23176961343527	0.167835527156474	0.14191977979609	0.704371641721768	2.43809456025121	4.98905720154676
2008007	16	0.448534357427655	1.20806200049481	0.494143431489282	0.956117803154623	0.406541881725891	0.775121435867518	0.636313666001268	0.825832508458969	2.5119772923262	0.419365077990994	0.231742210471197	0.385121015940254	1.08363526829894	0.82982251967915	0.167887508696391	0.242043184652981	0.782418091498015	2.17299556742286	3.09561361101103
2008007	17	0.467193781616589	0.582208786761455	0.495616441923811	0.489506109523891	0.696522870812025	0.759646166261434	0.693642491376841	0.972677289700833	2.27603542407673	0.418634869754814	0.220492903561893	0.390703392981525	0.765534678229251	0.747683494584535	0.192326295883384	0.323834792217504	0.869887743852669	1.8091659365369	2.50446253832581
2008007	18	0.448819446501082	0.434826952620919	0.560826783508476	0.346683042861947	0.68623508320443	1.37040494678095	0.755856275816247	0.718952648427729	1.49777789124148	0.441383154272571	0.20578749820088	0.38607103041811	0.69405592556102	1.02997412105095	0.229319936268697	0.730110750550741	1.05872754196322	1.5429634657225	1.34545899415469
2008007	19	0.648290734479146	0.203745020547542	0.581330043262813	0.352207832078098	0.634989577768691	1.50546896068086	0.813559290251755	0.769606096919211	1.07571346212492	0.453380661224231	0.206217653325263	0.359356808748211	0.678952271837588	0.685163968591572	0.269053376400321	0.596502195246515	1.2796773810563	1.21310924062446	1.0811195930222
2008007	20	0.57975384905999	0.206610157115683	0.570363788365159	0.325390993847665	0.598851202785359	1.34263396297942	0.622619824044745	0.902882312604338	0.997371474018269	0.476101375911672	0.195047732062473	0.339973104883378	0.685943672895192	0.516502796052739	0.281888296492031	0.534253490918378	1.09557303877088	0.949621551522433	1.56393827685632
2008007	21	2.73164365566392	0.615257432066852	0.544629792015731	0.136845904228753	0.668688717342287	1.34581115872172	0.495449201682152	1.01367322802711	0.954374753855917	0.530280801541257	0.192251246455304	0.337405105876587	0.66597855928841	0.461394065161472	0.294340470091961	0.67341020730349	0.5805056583692	0.849928261207189	3.81424319324357
2008007	22	6.18487035581318	1.76897663809991	0.593120234945919	0.165053257762022	1.21276631571734	1.22382093509532	0.446630552723356	1.18019621349973	0.83459187763643	0.532693108221346	0.190004874683507	0.340329787170807	0.652572230862384	0.446428985912693	0.310336464414524	0.780153232702059	0.235265091315869	0.773194190447147	3.49560290393518
2008007	23	6.19289614415252	1.50735822687167	0.565561368057346	0.433280232646143	1.42224569463851	1.04121983192467	0.419701751247594	0.816629257735653	0.713930550306279	0.460066147635067	0.188473964928211	0.345744716403926	0.643203615866029	0.489977931609012	0.645052949678404	0.755899557572714	0.202047965444399	0.649543126902806	3.22313845681502
2008008	0	5.29172248946367	0.657978967814263	0.421126876421554	0.385590569597438	1.48665102937754	0.801143782675978	0.403728521521384	2.34833516697118	0.632239259070939	0.459962186884547	0.180959442540126	0.335383996215769	0.64606871432005	0.444848933953663	0.260318601133362	0.798710918730754	0.330686245111482	0.551433416853558	2.95016436597231
2008008	1	3.91024404167448	0.229123514280981	0.363740384446998	1.19969281625213	1.11648175265104	0.592828301568497	0.602305482015695	5.04218893647612	0.566440757421557	1.13853646699265	0.165377630983835	0.3208596174525	0.643332615829834	0.364588393867543	0.315985259091134	0.850626317334909	0.462915677598836	0.498743055371398	2.58218223960554
2008008	2	3.97704110131258	0.716558875753766	0.326366663003281	0.634834294345225	2.72446440891339	0.810756543619504	0.443535173220124	5.03173949563554	0.522983612986044	1.83124123930439	0.191173362895239	0.321490988375846	0.656152402516519	0.293366493823783	0.379190262258536	0.817047044811943	0.426747637654278	0.490110699800787	2.2998552698459
2008008	3	5.94850876471199	1.20947171591982	0.307556001698982	0.377224457084556	4.35775992621531	0.991594618626797	0.403617743232643	4.2777296099464	0.519522288172232	2.27403921888026	0.216296540503584	0.31892758587041	0.652765331851732	0.237083127902676	0.315461541015444	0.616097294516466	0.448314994094138	0.522132010845671	1.97341654363579
2008008	4	9.27491477209681	1.89218645939604	0.297228397587621	0.0792209746069693	3.76933576135207	0.497613704801238	0.50740265074691	3.34087690871309	0.607177912866897	2.13422201818454	0.241485743848389	0.308573692488251	0.629452394377203	0.216837334151351	0.293179018141397	0.559959276529416	1.45642142343083	0.595306767658441	0.893714644243904
2008008	5	10.6884323680074	2.17998379558824	0.306761985252648	0.0832303721535328	3.06784639399394	0.504029408487234	0.955333333087809	3.07157941324648	0.832143754077325	1.65030454122747	0.32394324692574	0.301596143102888	0.607049281481686	0.215165238806593	0.302877869757958	0.646875531938382	1.79094977734963	0.651559196244721	0.689383364004414
2008008	6	9.09781304561892	2.55030480597088	0.362109690003261	0.37618123991551	2.65581908529823	0.939974444307604	0.998383597520372	4.47003935767011	1.01255952109507	1.5938490497087	0.463819885534842	0.295484331031651	0.588425242411849	0.218585796921605	0.188759496741381	0.621654182407892	1.15346558713928	0.757505977665259	0.787165223309883
2008008	7	6.42428495926314	2.6777181750206	0.548730601502156	0.909682585388478	2.92339607308777	1.06202633517321	0.746135225770123	6.97300173368979	1.05228781185917	4.11577771877943	0.635858328301965	0.290476195974124	0.546700974422805	0.224659065798922	0.177439995663642	0.437277814260709	0.810819822108561	0.94492865848894	1.12875266045845
2008008	8	5.13877146812094	1.71874229974125	0.377938892749875	3.24370174220359	4.26044298615621	0.901315928428967	0.796803023209542	8.10052502333413	1.36395630922294	7.51293655673	0.569049833326308	0.275213922263404	0.516551832035232	0.231079362719365	0.305979292618416	0.3558063064442	0.704001656613172	0.949439548291581	1.01771766135587
2008008	9	3.02758511464484	0.703090151759561	0.361895702526684	3.12443469986774	6.35536123364494	0.759232794290172	2.22800100317366	6.87229646501619	2.01343803285064	6.14843944894012	0.483838271273027	0.241984927625254	0.502476726866608	0.235376354984686	0.453026450559634	0.471786108827594	0.948628061452846	0.965439805256703	0.709302202789377
2008008	10	3.85805513038462	0.573183294851651	0.524205954726533	2.63379071077476	6.81656271088996	0.716938531223804	2.8148784113572	5.32618512690696	1.8715459543283	4.15765857228461	0.481284582216516	0.201224962601744	0.526806334029723	0.305631238207459	0.50970026807955	0.543477040290607	1.52953838949358	0.989946316411017	0.544052833769742
2008008	11	5.83157563754632	0.831159244223735	0.745643634833926	1.72819026701641	5.30853356655189	0.516342765603176	2.18592869979051	3.7921403458953	1.67324423952183	2.63303783921152	0.591876719349344	0.167450911738344	0.593769409080773	0.510992095117764	0.50940733646732	0.560317354658309	2.07688574578261	1.32448426463787	1.05793992507082
2008008	12	5.71674960925027	1.4046599505714	0.899472659096481	0.617886500076826	3.63430679656557	0.406907928042137	1.55023956239521	1.41309142156084	3.74563365538483	1.19351912899744	0.704254749360278	0.143904026213947	0.610545671399306	0.615653872167829	0.310704047259018	0.6861364510237	2.39655149497099	1.40623833520274	1.28157659835625
2008008	13	4.9614140002546	1.54867697593045	0.667297688056631	0.420306753541617	2.04435139360061	0.555661422616541	1.07468754520658	1.49184997147803	5.45672511561637	0.934754783813899	0.783712823577284	0.13035258134977	0.790883133294604	0.563118627617362	0.335231204129414	0.598578015241713	2.27317229898241	1.46169550965714	1.42154355735842
2008008	14	3.70948493017665	1.03909246342883	0.48655383205348	0.532822204996851	1.24298323629728	0.58791367038414	0.684509082937376	1.6043381180022	5.70804394444368	1.9832519345344	0.780930492067293	0.119154496600767	1.03445833179629	0.43065482838375	0.333866282843489	0.382935573541348	1.54255551109863	2.79402338042001	0.8654617158991
2008008	15	3.0484552253042	0.591773028793791	0.379230117178713	0.715988072491722	0.84888738572924	0.464295572049791	0.490052118918821	1.90123453029479	4.00837278819851	2.15298210903257	0.767375468217101	0.109651427833835	1.16977381730999	0.37010596681944	0.319099186163988	0.186385466720605	1.92978924288093	4.50598538019699	0.587228359924527
2008008	16	3.85668388785458	0.499704704349999	0.396276041984867	0.693701132409507	0.557543976471308	0.400912700983039	0.649622947608898	1.90930982332417	2.26904413735808	2.03473530714596	0.729573788802799	0.106017245709074	2.47770118525712	0.33904857387114	0.24067711388743	0.165964396473039	4.6451345178757	4.85362046567839	0.576526149427519
2008008	17	5.23237463475407	0.323999557665142	0.457539159533772	0.515712321457337	0.511195866858055	0.450594279371106	0.937129553078316	1.56778484580553	1.55110402872355	1.4282937540407	0.705156854519713	0.106512100879732	2.31089831831253	0.372801693761815	0.164905020988212	0.163906652581202	3.5901966214061	4.65265025605	0.550988054277309
2008008	18	5.39317335309701	0.302118729097612	0.627844560413224	0.385919577047441	0.547166608057903	0.420274405690696	1.01631530993248	1.04941560982594	1.5348756712497	1.12720329396826	0.716025830139232	0.109635221131824	2.94145186188895	0.396373944638004	0.137759075286067	0.16670533996733	2.64370156012422	2.99346074276987	0.564060020975543
2008008	19	5.92847375943299	0.295307575261732	0.751954524596707	0.362067207384789	0.529577758486278	0.251078422361656	0.953436760403255	0.653622999175864	2.78558524445199	0.695352089141173	0.712088771333964	0.113455098825553	2.3552908470271	0.391971975863318	0.159155181800436	0.168635397801532	1.60358818974039	1.72165983911803	0.649801598425266
2008008	20	7.6489993311479	0.313727449362513	0.833639327791116	0.312473104642069	0.501007865413782	0.193197880068428	0.625992225837769	0.675045292646711	3.00765651165496	0.125445814984264	0.707250678584071	0.117516478910457	1.78991999175346	0.360180336854606	0.225174084225741	0.175034098015997	0.616945749257678	1.45097850016152	0.773056878193869
2008008	21	8.91207370056872	0.388838253026364	0.743961818354602	0.283915473329307	0.464018556885219	0.173687968716585	0.197895980528289	0.626429727815705	2.84407921969431	0.20124262486458	0.662792446324808	0.134533037708406	1.4277363455268	0.377344536923696	0.293120237471585	0.184282340924494	0.446191904043052	1.94888698290262	0.739625499817074
2008008	22	9.41907571115091	0.442262136884273	0.590220386695736	0.143429525631342	0.40861727906788	0.173434970240349	0.143149694153002	0.782764854187539	2.29446966319582	2.03098444388243	0.585582623528464	0.214425652387425	1.14267148992038	0.370825472856841	0.336851347285496	0.219124486085636	0.452415594609891	2.7024647879195	0.876992716367072
2008008	23	8.36994917516175	0.525447815110799	0.422173324690988	0.132835591686685	0.373353936469268	0.210474862062038	0.423953292619272	1.42906634539693	0.993099808660533	3.15397264000345	0.500402426669399	0.279448367641989	1.09138021373405	0.380989427543838	0.350823576530634	0.246925789419151	0.436007258717479	2.70244909135731	0.767686674902731
2008009	0	5.73571005683461	0.746858879134933	0.325444652286783	0.238537626754243	0.394456155438775	0.259472697192657	0.749165690829577	0.972948506391121	0.620206641621304	4.06600492882452	0.373091778880011	0.263508976167926	0.947546726055827	0.399647654811228	0.457368234573883	0.220873409576882	0.392229003504296	1.8541367376427	0.573882834356655
2008009	1	4.58467753914589	0.95796732352317	0.276276038165649	0.25793894084787	0.422801869982479	0.280057065617454	1.14452706832002	0.957008727983719	2.49398876046463	4.97951579353468	0.43515516846633	0.193132602939616	0.462166683768613	0.414802315266059	0.429250391274139	0.219960906444888	0.350553528408472	0.512089902390938	0.479136323206335
2008009	2	5.19984011168501	0.880098765963663	0.281782527010062	0.381347891960443	0.449582119625864	0.26757139928034	1.53141211378995	1.12833746073779	5.41992859507726	8.2898139139079	0.46442035734268	0.145383670001677	0.378744075567447	0.439825421755742	0.326074417219469	0.209723450371822	0.299274068159499	1.18991318802302	0.416677213108174
2008009	3	5.4469738036649	0.71966299762273	0.221547850894666	0.366943291535066	0.424457839737402	0.245193876658272	1.31255897555598	0.939579250385292	6.7799501385953	6.73062222880239	0.386174782263931	0.11285164032669	0.632357065164971	0.432052736856636	0.297844141409646	0.197136863524543	0.283482076752271	3.99254284346703	0.35731389565878
2008009	4	5.27722243984113	0.62919043696723	0.185423034963332	0.420512071127627	0.46855304181955	0.215978163442849	1.06014964152678	0.830944321223663	4.72687769810323	6.4574814402342	0.311276973857188	0.0996662458910114	0.710900123447652	0.706965101404673	0.281568049591766	0.183976850225549	0.24967507299523	6.71733602035573	0.380228476579375
2008009	5	5.30029436920183	0.597983044659996	0.141462933664889	0.3856224736027	0.679633525998472	0.302245745336341	1.31533802889612	0.995470611009902	3.83406393423087	6.43988678665739	0.336086400037701	0.103538684890266	2.84988278272488	1.02645400400168	0.254717528461433	0.181425251197523	0.18465528133756	6.70637234613969	0.403264533805602
2008009	6	5.98987824902824	0.455539754297667	0.115232248702878	0.317886607317542	1.11609366904716	0.477220535895366	1.39507636674595	1.2143481982147	3.48929941596829	7.67135103262167	0.372520040514674	0.111668164552159	4.12443311908484	0.875269203979847	0.27514204980182	0.190917509669149	0.261730727419965	4.76876289630366	0.27535603515315
2008009	7	7.77420192580078	0.368094800345906	0.112274100185054	0.278611403133176	1.03443924400415	0.495665870428631	1.84002135672602	1.11346348459324	3.17473696366386	7.15570889093782	0.373836592646365	0.117927745112279	1.93808044642401	0.726036546679645	0.252564331894341	0.186594860010091	0.36784573053429	4.69754156229182	0.73865333945628
2008009	8	6.55753831202936	0.30424096971793	0.129063451598862	0.268405118297865	0.769902509047238	0.28590136919487	2.66633956587107	0.855141494320347	2.88506501591722	3.54709186583437	0.351641280653244	0.120295662864685	0.593614888188544	0.492444441926299	0.174564193548333	0.166885467800364	0.417997800202996	4.38715964751895	1.0204204110429
2008009	9	6.47491740588332	0.249176143475263	0.114295175845651	0.24786470888698	0.432329735494337	0.193471154261651	2.25714045095492	0.755105341795664	2.97562528253166	2.99359565967471	0.359310779472855	0.120034116248752	0.824621737489942	0.282555504874068	0.340917004184572	0.247114634038224	0.570403439611802	4.38629305450262	1.18613080988984
2008009	10	6.89950738905696	0.233910484199316	0.111472228654035	0.215626670479249	0.312413777543212	0.156128640508204	1.52607732425985	0.762704541805947	3.45023343183279	7.0493108185276	0.356203665220251	0.119642749725623	1.66124418568169	0.87932913960506	0.450964433375883	0.323699265199065	0.872293854268732	4.71990579344347	2.59316441135403
2008009	11	8.16927216075214	0.258969896810508	0.10932666081787	0.189454932287604	0.276580941209393	0.149264048534853	2.21130286289048	0.900050419373687	3.70890236652497	8.16215419950542	0.340822013738991	0.12104222477297	3.42088680950098	2.08383412568423	0.408568332512711	0.263777316884654	0.922681852121151	4.67293978760764	2.08084568969648
2008009	12	10.1647361480408	0.21217550480933	0.112379897099449	0.190574337556246	0.258419422194154	0.150120193866299	6.03539421816185	1.08514995197122	2.82570718857308	10.1788282378112	0.440462278250671	0.125327918565843	7.88832525463611	2.06421788258748	0.353745196481531	0.218774037888423	0.540312362980164	3.31824391070268	1.4508697921844
2008009	13	10.2998472570987	0.127408289837156	0.113065976265235	0.193103394747836	0.278954801126385	0.158533721862681	6.84909067643922	2.53517284001642	3.71487719799999	11.0445727606052	0.724885826200851	0.134653747702804	4.43981704954605	1.62285238664393	0.33832393118833	0.198881858132768	0.432353182308758	4.1815653273845	1.19756341497611
2008009	14	10.0218919800043	0.081027757369931	0.114060591784716	0.196580463706008	0.341416174477656	0.154920263269629	7.98680475850284	4.07869620263739	5.04368691082679	10.8304904287543	1.14193698573473	0.147654124292608	7.6762858065894	1.86759789617898	0.383706892115653	0.193267908610855	0.464676829102174	5.84891079518268	1.03653684760054
2008009	15	9.47203365975226	0.0997072052910439	0.119208583972514	0.182677955212705	0.381459679186663	0.13276233741203	8.08866736128259	4.48927122911239	5.00872968313492	9.90622797137305	1.15864107028422	0.163352354755882	7.59961376111546	3.58323434077265	0.290394423700827	0.14822505059616	0.291167589528542	5.35105463412032	0.982531488818196
2008009	16	8.80959726802729	0.134008212034661	0.116144706774608	0.143239517692106	0.633840508315501	0.0979890611050857	8.12973118488741	4.25396059893095	5.25522848187808	7.74124552353492	1.1016994710053	0.177674436787445	6.57509753047249	3.45752953638856	0.25243518414509	0.123988163143872	0.186434419631331	6.9742239147487	0.997189401736902
2008009	17	8.05307914039503	0.135359981143072	0.108929742474616	0.118482883339191	1.04752733997225	0.083316326543673	7.21715364330906	5.82112588591824	7.28776708944576	7.40736267429115	1.05277869855608	0.217606674901232	7.91263203369877	2.16997189166934	0.23155418503458	0.134390746807297	0.168014396116162	8.71419029984452	0.568100704837532
2008009	18	7.23708862075607	0.282344257471355	0.0977422913078227	0.106433504624405	1.5085891253043	0.077128713157719	6.11752927183938	5.88863873501994	7.83207987956252	7.50186310258186	1.3623415871009	0.28599024617968	7.05988936423017	2.64596585489209	0.226384033549137	0.147115699642348	0.15970152120707	8.59487181249679	0.4894513353904
2008009	19	6.91302530009054	0.336800515606391	0.081046230394101	0.082636216345725	1.80921471769428	0.0671722704938176	6.05537711661326	5.38165304669785	7.15910555983819	7.52248892381884	1.453136797607	0.314043473233127	6.33366733666755	2.68339057200485	0.219338778294272	0.150637833095759	0.170864621529702	7.00869673783312	0.41345687181483
2008009	20	6.11682670158536	0.34248266677258	0.0744335031373372	0.0730731009698675	2.46033713064285	0.0549408068072178	5.73821864538832	4.47753008985121	6.76183331664525	6.48930826242309	1.82169926500515	0.308531573191709	5.07990975932107	2.2883886407288	0.206194890009926	0.162226417108049	0.239815936128031	6.25416565068363	0.397723149504145
2008009	21	5.46638030980046	0.337067915168958	0.07057287391276	0.188438432287854	2.71935928743025	0.0466137636554744	4.38104815682714	3.44071204957207	6.62943673816446	5.67283831992657	2.34144794100909	0.330110132760974	3.1779889187075	2.15930600611491	0.193839345669769	0.160653371446213	0.338698941863454	6.40836221590876	0.398202196625241
2008009	22	4.85119052748188	0.321592697514452	0.0677380063575566	0.330919947328296	2.3065478945466	0.0409839368987676	4.01180019340336	2.5252388955307	5.8179650361635	4.99622963422788	2.22815793129786	0.504025854355558	2.79009549698037	2.31750885873971	0.185493481155739	0.143865084152029	0.617427759641537	6.19598658926812	0.400087358913608
2008009	23	3.75467072261592	0.343527401266149	0.0665130101193342	0.282844756603763	1.51093873035428	0.0393252685565397	3.58839568366915	1.68982809093133	5.56291113553782	4.47112921103628	2.20233643221759	0.57278839170107	3.92284157436668	2.27413094418244	0.176705355058551	0.136812836822725	1.42790271432896	5.93895129775629	0.385202312922784
2008010	0	3.72493918867903	0.398689473063888	0.068493601624	0.245000400314068	0.878832662344574	0.038697813275822	3.09941786852667	0.865199199100816	4.88806249160915	3.98210208829693	1.9447226408799	0.584702381152118	4.59650927177139	2.14677673760911	0.171385740873447	0.137056362535691	2.28449432629192	5.69345322432941	0.390330318340689
2008010	1	3.83452255691802	0.333776698801159	0.0722462298781514	0.24665710800715	0.503241307002069	0.0384849781968337	2.65336438233512	0.649517676197715	4.69995476549854	3.16724348997657	1.18778479802344	0.604290560467256	4.26313048538621	1.97031469895035	0.193865780496118	0.126555806452852	2.14922505460528	5.17602972346652	0.46623125940994
2008010	2	4.87048948450339	0.248422157560133	0.0731645687703887	0.20763533952634	0.369897570187922	0.0387914249592988	2.06323782871475	0.942948736892624	4.54845776679583	3.67804968000607	0.892025527839582	0.499379659033393	3.71424229794998	0.932660864140783	0.217578402434216	0.119841878965887	2.20150714498928	4.91869243392137	1.03369659937958
2008010	3	6.64261258284201	0.224228742863517	0.0715949244823729	0.183702684750749	0.285463092595943	0.0387357470616361	2.00975878166549	1.1849361753329	4.25352493669994	2.72544223009551	1.49507895393866	0.407103200029194	4.04906160468783	0.781566517986392	0.192716680435565	0.115349444639382	2.79217386131185	4.56626462196859	1.33306619376683
2008010	4	9.36122755053192	0.244845468587293	0.0718383110669341	0.233902715975123	0.30361760416258	0.0364958662286699	1.81209939821549	1.20927298432371	3.18517659298954	3.57611098330681	2.72703715575498	0.405475856512862	3.78199457646104	1.07925762734588	0.176962495937722	0.113789079109716	2.97055302913275	4.20126101366413	1.35626507375448
2008010	5	11.6207545064657	0.288566242615566	0.0778143410533891	0.255878656893083	0.33315199088424	0.0327677005100111	1.79874440693405	1.29793844980041	2.72955680660543	1.52407890271753	2.85175765197116	0.4423728622291	3.03429873775863	1.92388510724213	0.165612459886859	0.111872683073234	2.33075400801359	3.38942057433852	0.879140739280808
2008010	6	14.1949736171813	0.312934486353476	0.1069592551286	0.244448305471954	0.32121551057808	0.03282788427925	1.84817745482447	1.55910843928504	3.30985809686386	1.44479684298366	2.51714677842128	0.479382869226345	2.76170337204904	1.33776686209038	0.156410612577224	0.110447253308063	1.16677438817553	3.11545647929901	0.532481009386283
2008010	7	15.0986466920219	0.368562083078859	0.199513723569828	0.193645561811588	0.375589906660182	0.0521934629625422	1.61402808474948	1.87828534089704	4.28547732939723	3.6735280786291	2.45574231215594	0.458648693376354	2.62008415207219	1.05827210959438	0.147715273768318	0.110515580369413	0.954289163302316	4.88790392642961	0.42309286244567
2008010	8	15.2189503485165	0.704119127090531	0.173734410163273	0.143539112059946	0.5786220071689	0.0933925858544257	1.49918780066977	1.95490650514154	7.78493176170958	6.33996002644127	2.95301125878351	0.464792857988943	1.2000650757026	1.45953789604153	0.136942660886784	0.111685998892114	1.01015750254603	7.85530245651842	0.37035556865717
2008010	9	14.2497569712627	0.836412665052708	0.148286689526099	0.233803986676446	0.750065351418336	0.106733429944009	1.99493524575396	1.72872227062035	8.98738253554335	5.47862442089284	3.22456556518916	0.500471706218064	0.758166196325124	1.92615213726818	0.123852505938716	0.0932481212354465	0.494285847604006	8.36755005848467	0.335904481012012
2008010	10	13.387139459529	0.65784730009926	0.14593154829255	0.361929929957218	0.710443963260048	0.144501998860524	2.15271112163669	1.60626722546425	8.22089481706415	4.33672444374899	2.85260887422821	0.51852656241973	0.915913528671956	1.54741658201188	0.111636944679493	0.136968519219971	0.324005037639599	7.59665122846413	0.342945895401453
2008010	11	12.2678297431872	0.192916433225988	0.126379747619236	0.353468565671228	0.49570589445854	0.0467936731940614	2.32306581165589	1.70881700484585	7.23488138881957	4.46143406419084	2.77814631546511	0.614728785749659	0.80163624529855	1.11121156151683	0.102070072773357	0.126794650642224	0.278017793840514	6.6847790147787	0.512527401647321
2008010	12	11.0065208557725	0.155676431001078	0.124215513066422	0.283837511614486	0.692279561834928	0.0349823105707332	2.99343124466503	1.65281741047781	7.4038931238093	6.56646355796522	2.7080766941273	0.850013384892746	0.93188409665996	0.834966842280635	0.0962198481289657	0.108330616960341	0.220612497326302	6.19663229764164	0.531860967726784
2008010	13	9.11566254632507	0.17714679179343	0.100592615683293	0.203673725340281	0.93781475041537	0.0360279052236994	3.10731782837166	1.59632161700794	8.63673985734082	7.74660553925512	2.96762457828384	1.0976985514916	0.863973789690441	0.634493761209682	0.0947696496094804	0.120580848550481	0.307401263951518	6.45834183397562	0.389799680557182
2008010	14	6.86764999843539	0.125555940776305	0.0890377923880649	0.169012589124056	1.01725114939332	0.0430265017437955	3.0667714388188	1.4056010609995	8.84278957617721	6.46656764188543	3.22807800284599	1.11884899384502	0.864673680176125	0.628412546445434	0.0957347742535365	0.146161140637932	0.328408576064857	7.68113860238974	0.205625427944157
2008010	15	6.08893017425641	0.114059667232257	0.0758959073632068	0.0581679109950115	1.07710805318819	0.0549504950531916	3.17099388707752	1.03928073437241	8.11497023846307	7.51857748811914	2.53814006253966	0.838779218392993	0.855130640079277	0.589265829170394	0.0966958809632283	0.163998605866867	0.339356214735273	8.51194037469531	0.285877950686347
2008010	16	5.92282839093454	0.110535565697869	0.0617401608154201	0.0431474643674248	0.805060256210733	0.0715540548350315	2.67305265980951	0.905425332663436	6.6650058833203	8.10967056516608	2.54046628094942	1.32017346562826	1.0562745745045	0.619634823413496	0.0974521013600232	0.159436023771959	0.439013400452295	7.23341321567671	0.112476575646985
2008010	17	6.42902346955487	0.078183675649095	0.0586972608419754	0.0349803196085456	0.541885276909069	0.0705049803590577	2.01710580601386	0.765555499465668	5.56170330550638	7.27008336828727	4.10752326800635	1.61995157495542	1.3249875212463	0.586852153855279	0.0983870141043164	0.154318225155909	0.452027904335407	5.21363535497432	0.0867713382834132
2008010	18	7.15262135621495	0.039317889669141	0.05399790098289	0.0400083062559512	0.320542380858384	0.0611944539101101	1.67388572151959	0.665837873206089	4.42008215125882	6.95470458017266	4.25419832268047	1.69068371779456	0.977462298325797	0.579666355081594	0.100581839485239	0.147389569235725	0.348584589781673	6.9603511873418	0.21338180676851
2008010	19	8.35262743707045	0.0349169028844079	0.0533381532743738	0.0494891374729602	0.196112623075457	0.0553373131675716	1.4683619621256	0.587320043002818	4.24761475388042	9.14427131917911	3.19347172978661	1.49863341629685	0.332635356931442	0.700477978994328	0.107258884527579	0.150866902044871	0.209662460707974	6.2436587910858	0.268012885287955
2008010	20	7.64704176896698	0.0381261387585874	0.0547162444648559	0.0520994636206905	0.112942829049975	0.0486007870428816	1.21826480943077	0.787470718332648	4.52079098816823	9.29490340337341	3.05505910270614	1.37330461969447	0.294330799304607	1.13480680002509	0.119434255047173	0.151618235586926	0.224778507858969	5.90580191298677	0.267446432521689
2008010	21	9.00882247420384	0.0437263758792442	0.0551470424619493	0.048611407066985	0.0888377985738368	0.0403814781290008	1.12951711348363	0.922970724961822	4.90460491139844	7.44135019432113	2.94602996381948	1.39474764843696	0.234824852411308	1.19271866362397	0.129868077224304	0.149210308182938	0.195158809994438	6.49076294104865	0.251225885081269
2008010	22	12.2006958474135	0.0512074292699065	0.0528934588942365	0.0470082983586162	0.0863766953717832	0.0357909840048393	1.19320106797078	0.677301022355496	6.12554375040611	4.51487647832768	2.62145989397421	1.30629113483189	0.218139125946896	0.689326647023271	0.134442749057235	0.151674401714429	0.226740805095505	8.24968432302927	0.243358058497747
2008010	23	12.6150362044458	0.0576393820372101	0.0556187115668638	0.0457872277519792	0.0722916524505148	0.0376463766837667	0.841844003267752	0.939984225956224	6.69052208454911	2.90198919941969	2.3061936423882	1.22672894550323	0.210760017488944	0.636259668862562	0.135398654583997	0.159740456515826	0.276589447821427	9.82449200255667	0.255035034700376
2008011	0	14.8437358702982	0.0605828037805095	0.058502979984108	0.044014823927912	0.216902337710473	0.0606512183550957	0.596567453547698	1.09443752198274	5.4153486763927	3.8525179242823	2.30491450278407	1.13153619262359	0.262612185102088	0.588192436398728	0.133433816105381	0.171822946089359	0.0941936781700255	7.96146402511463	0.235204485767542
2008011	1	16.1503599787959	0.0522870099325401	0.0526158329462412	0.0437753522687592	0.238334910967466	0.0749916049680234	0.751437286431033	1.34682276267948	9.65951754435063	4.96133963256655	3.16522969928528	1.18256246695481	0.266405079286572	0.517494423143206	0.131549051244981	0.191273316463077	0.160052523250653	6.16199866889965	0.260582848955548
2008011	2	16.4595348512248	0.0411483969291806	0.0438110447119072	0.0411831318623084	0.365141891715409	0.0762757315059011	0.774089432903314	2.13700605296668	12.6450029244223	6.62034351702244	4.05022452823679	1.11071994859121	0.727254538532508	0.401303261701429	0.167792070387867	0.222652165133509	0.163957019407936	10.0647215723992	0.27321722945746
2008011	3	16.7326867705211	0.0376252780545998	0.0387952262754537	0.0381823944947649	0.181336417165817	0.0668954247912931	0.898178450702062	2.58058617048827	14.2819448713008	6.73531977266265	3.48652092917992	0.950619012187052	0.984320449394288	0.330854980367595	0.183666850888671	0.244389790698715	0.162525081460281	13.2973193908117	0.331166339096182
2008011	4	14.9173777272815	0.0313701094301921	0.0420609308295588	0.0380841832466729	0.143916997463268	0.060091370420608	1.156751319836	2.49651851319402	14.3426222590549	5.71449185697572	3.45986425443617	0.921526936411314	1.44355414356157	0.32307110584587	0.19595572340827	0.248024057507867	0.188149035729274	12.7620407961601	0.703807579181825
2008011	5	12.3281611314708	0.0227942809742515	0.0476390418447313	0.0350574688943487	0.130177853742335	0.0564653251244199	1.22857646929789	2.33468315358003	12.5225466546198	4.75289120077808	3.8225421712644	0.912226434940071	1.24987770402883	0.301903901086899	0.204288709388476	0.24313781377469	0.186934107795022	11.4898524419066	0.774914800293196
2008011	6	9.9503567270361	0.011824975361983	0.0522188338018526	0.0332977962669777	0.129757913759748	0.050621651122542	1.43761687283114	2.14810441937098	10.7621092922279	3.88331584893588	3.63255121620321	0.991209398313948	0.400236822753073	0.218857550983377	0.18721188181448	0.224083416390265	0.169642834396646	10.1300530498317	0.510966081837666
2008011	7	4.53676161224464	0.00873248480335569	0.058292014663254	0.0283773679960127	0.129976407500364	0.0469079803250639	1.56617435526934	2.02649419935323	9.48207211931766	4.11822978380513	3.95437898340483	1.05786997404328	0.16917795363788	0.221651551894682	0.180582948637237	0.197827595873905	0.161315767089681	8.46016269158148	0.273025115398347
2008011	8	3.25700856029204	0.00876100409287708	0.0671777979202007	0.0224750723313413	0.126650859053616	0.0453417739492077	1.19219706496497	1.94268401094815	7.85823320854435	4.87216299923814	3.82077686192202	1.05001130182667	0.327095655046302	0.230752494037549	0.186420242797296	0.168130965369505	0.148939765914398	7.01061599820433	0.196116429116875
2008011	9	1.75839715026442	0.0113230957569652	0.0751736567618029	0.0169794539400874	0.125885388960084	0.0429023838732728	0.975131582737813	1.88817782245812	6.42773621883828	4.49973912966903	4.3288765495253	1.04234928406745	0.258973713083737	0.268513786206765	0.194269796344187	0.154597094733121	0.157555419478094	5.72528530668624	0.146918331868604
2008011	10	2.59035887431888	0.0234613469057407	0.0827986976814787	0.0127353721900243	0.109491406071769	0.0357126024164306	1.17106659580455	1.7992023161233	5.64910038707875	3.9014114889113	5.89442945391674	0.952005599004485	0.310027530817195	0.301657240704749	0.201371800338127	0.172796606402878	0.147504652835402	4.85378064014522	0.100881040573304
2008011	11	2.42471074034851	0.0229228083662148	0.0792843883266191	0.0122381474328192	0.112551573254133	0.0303778969474212	2.12044868853122	1.82199316478142	2.71168473204868	3.490709310893	6.47884173329485	0.834431507175462	0.550680817776832	0.244942175707297	0.198815756239562	0.149771833004968	0.151965103138978	3.81873984365635	0.0841431546132986
2008011	12	1.95582906727042	0.0205739586687432	0.0736986097835577	0.0148360234346916	0.122010398422174	0.0277294257522174	1.9519603678017	1.86010076381518	1.86942852496852	3.05521776408669	6.42690503556704	0.720804313760289	0.769032219661461	0.211034365140799	0.198748545958218	0.131957418745105	0.140394121857112	3.0852158658742	0.112458607902371
2008011	13	2.06799144738651	0.0217718515787323	0.0706649359332501	0.015020605712763	0.120456566260742	0.0273787676218697	1.72565658189475	1.87136184665913	1.5601902189677	2.70498444315231	6.33929639981426	0.824796558437983	0.810865781068579	0.209293059828181	0.182498601824541	0.118605279409429	0.140630464215245	2.63464089426608	0.0536447210962383
2008011	14	2.34418316439309	0.0205475530133356	0.0589704189503325	0.0148114794073024	0.117474610940409	0.0290378960075086	1.59041807628134	1.71055346615732	1.3116188557916	2.41572896460872	5.97496968849364	1.04601245888975	0.810186481854641	0.208154269873594	0.16220425620908	0.108690764953401	0.122236430743872	2.53068364143818	0.0212454719443667
2008011	15	2.54239407778123	0.0206658815013329	0.0499413870975703	0.0127808902057336	0.0948073459522287	0.0292650280550374	1.06239867013477	1.07649201908725	1.13460324565878	2.04996546722534	5.27743177613702	1.20242169036937	0.775247520039104	0.2063657599389	0.136280597894613	0.105031769545593	0.120809829914165	2.37942945213695	0.0871285635053619
2008011	16	1.14717989848936	0.0185827377507766	0.0399677071868544	0.0138626518603035	0.106805421016959	0.0294397675108491	0.870688976348422	0.906052357530149	1.08958453102044	1.58510391076071	4.08183118103219	1.53860469790378	1.01755046963355	0.202647317755719	0.127066604640679	0.0844578474978355	0.0668846559247062	2.14010428535347	0.932280535920227
2008011	17	0.987655411902548	0.0156238832529232	0.0313483999885236	0.017579988515676	0.0883776970002327	0.0332841853483733	0.815100469477109	0.830060178353287	1.53110897282118	1.27251064273566	3.03540549107742	1.41652264340927	1.05061477734686	0.195307158771207	0.110051592012612	0.083021108878643	0.0542661961870152	1.90600941479512	1.64404576349328
2008011	18	3.17806277523525	0.0141201834327521	0.0251887977808097	0.0186611779687001	0.0680260591490172	0.0370877072622302	0.885564702291681	0.754844114981645	1.19773682406485	1.17223961553743	2.51688061450212	1.32050058433929	1.05659228572824	0.18401773000283	0.103732621415165	0.079605446448066	0.0544651081204539	1.72983346524648	1.79992684911407
2008011	19	5.80784679728059	0.0143119140625003	0.021116733359945	0.0173459694793689	0.0566815776638404	0.0483471709249152	0.999502548403751	0.746653630475848	0.920157906997349	1.05647464199625	1.99388179326524	1.28567600879631	1.11131329330347	0.170137285743903	0.110932570305287	0.0764692344782318	0.0586884126749011	1.62356176838204	1.96917829677793
2008011	20	6.34668956533385	0.0144677201942013	0.0187272227218845	0.0125067826480012	0.0634852922258452	0.0938964828368712	0.946436683344099	0.816348216748165	1.02450988315816	1.10221919032096	1.77833998076239	1.2705300687715	1.08207574034371	0.154930550972033	0.117075637918201	0.074552810791102	0.0550944235843499	1.594678393266	1.76312735634952
2008011	21	7.47647533577437	0.0142347651123598	0.0174152114449993	0.00900726996789755	0.0723348096167611	0.0870330148417179	0.776549526158529	0.832521181358019	0.884338712985477	0.879378337861673	1.60235576859073	1.20064069149947	1.08350507165584	0.142216647156953	0.121938728351136	0.0730485979664886	0.0572625762197992	1.63692383321138	1.12245515497203
2008011	22	4.23279216683973	0.0209145598894809	0.0175632760182732	0.0268257112272255	0.0693467190662571	0.0679157245793511	0.534180449745597	0.795324353997886	0.839511465372923	0.565833501045128	1.41660967515305	1.01904398367712	1.10687518487201	0.137198835493238	0.118950036899731	0.0702713591057893	0.0600261393618106	1.74386795550581	0.681127812536174
2008011	23	4.05387432524368	0.0324381212613229	0.0164560400753697	0.0404413737710752	0.0663761213993808	0.0567126309591963	0.316920359979296	0.771964030232414	0.943428778388598	0.246271136114359	1.30487400851578	0.938861583332087	1.09347158456832	0.13918026553737	0.142439941505032	0.0693970723376044	0.0617694965795904	1.98771754205662	0.620546136135598
2008012	0	3.63040178452871	0.0375812192694397	0.014537536015196	0.0452129322905813	0.0610387737652096	0.0479132854897	0.164189757881814	0.760666339187907	1.31069003011988	0.149294002301354	1.18988958992706	0.758619719911718	1.1315515358506	0.141602464105237	0.126362519298204	0.0696579983109163	0.0627036050907613	1.9417473959055	0.625575783695268
2008012	1	3.16785738121469	0.0359353914830989	0.0142516588927977	0.0389690305841146	0.0493910618531586	0.0431496023952086	0.12667375517836	0.78021432446306	1.95865648769273	0.541404081077512	0.823101222227404	0.615809415415949	1.08542523737894	0.146126224635003	0.123460661170441	0.0707861604035132	0.0608280674292035	1.28226224451075	0.571289652655891
2008012	2	2.8600246714718	0.0296175866736138	0.00980893678258768	0.0316437386778261	0.0472514362918528	0.0408760855144796	0.694077154444405	0.770566646878623	2.42977800349304	1.20732138543657	0.596356206853231	0.999646832510907	1.02872729056535	0.154589215801088	0.124598257842037	0.0716800203207573	0.0636302874972018	0.67290117451584	0.770768515979636
2008012	3	2.80834810213668	0.0219030050272496	0.0425350661948034	0.0272219192224875	0.0481619552558832	0.0552270425353943	1.46246092288492	0.647761283939531	2.69582873238353	1.95887483214597	0.520691312320563	1.02522574045745	0.956696790458615	0.165298934050401	0.132173448166407	0.0715101471999486	0.0759452975292381	0.741905084476581	1.35216258418457
2008012	4	3.11451813411012	0.0290087299992256	0.0892614152793125	0.0245675453367439	0.0492904929792387	0.059719735125125	1.54044053865227	0.608889635161055	2.2434685062528	3.21174320825085	0.460739640421926	0.649882619616961	0.909145108140808	0.174802286516692	0.132263671746553	0.0704756506872856	0.0725927609938865	1.40126969807227	1.97806374670938
2008012	5	3.45814064001295	0.164134953452023	0.120628884873971	0.0221684170781915	0.050913146067338	0.0571771782151258	1.4188878589089	0.848735287580583	1.7186703174065	2.99369072199151	0.443409381170022	0.398696293019196	0.884835123030948	0.187016809501946	0.129566124278183	0.0694506482100795	0.074367900677236	2.25784381398634	1.84522846784515
2008012	6	4.28980284764086	0.357277745534245	0.169125369428453	0.0212408061046957	0.0483076629209137	0.054891559465518	1.1921892416803	1.06181578575203	1.50252631557361	2.56867866640163	0.434586585692535	0.430776630096964	0.844412533694413	0.202940194446831	0.116108320257666	0.0694800767863574	0.0764146223867333	2.53094725943394	1.17864635023683
2008012	7	4.26463310507476	0.34362087658593	0.213950618752528	0.0217939237779795	0.0425432088791403	0.0478908490865612	0.927178766460065	1.06062803212331	1.41123969757048	2.62486403524799	0.425364205611428	0.463420810671822	0.836339365246173	0.228976998985135	0.10122505655434	0.0714871199074595	0.0783192696433695	2.35922318898738	0.793912847479308
2008012	8	4.34666806700348	0.229131552470847	0.251474824549768	0.0227649826111725	0.0911171124607834	0.0386660201296858	0.711100406896792	0.677883899309023	1.35991341140957	2.78447299946984	0.45595859602733	0.382756797552639	0.780426815947674	0.253129505172521	0.0847308836576256	0.0735330144365044	0.0771746844300563	2.05468321965473	0.865987344678023
2008012	9	5.6419002475606	0.298141752721362	0.278002186550654	0.0418790343744441	0.216149455858571	0.0429695163982548	1.49756324656089	0.588384193561981	1.44967419410862	2.84661236590596	0.498651702271823	0.334866835118532	0.715442375693133	0.356926591445189	0.0767813864566944	0.0733475783178177	0.0749284089208202	2.05167177617988	1.0957511399629
2008012	10	6.18026311169716	0.64284230121291	0.276714882692631	0.180646330964835	0.280000751026055	0.135212158284768	1.94705226791668	0.600333556552314	1.62813767348311	2.63938614954283	0.548490451150906	0.331022563124701	0.56808839925115	0.736932106896039	0.0775660121358976	0.0649398321472699	0.0726778975801763	2.02847392849878	1.18372754189699
2008012	11	4.76037874570678	0.783276655803075	0.308378189874638	0.205619013936592	0.310829466676735	0.245782499181421	1.62253150666536	0.743280459434447	1.83585735049102	2.01421973761789	0.553888064526435	0.315114704949798	0.477005961965592	1.12009273233997	0.0765626474694922	0.062530638830947	0.0722294097138824	2.521953830251	1.26251159160605
2008012	12	3.03193166699163	0.679816313717483	0.275972825124078	0.176722840529904	0.262207673147613	0.377001525090201	1.22682848286303	0.849403610374266	1.86995906098048	1.64728064708151	0.402122614326794	0.307483974939919	0.426392781805191	1.16334732636877	0.0709432445827603	0.062481567391319	0.0699703583834483	2.11680837142087	1.24023210407683
2008012	13	3.76172998076932	0.467667433361468	0.244621849769489	0.396268293043947	0.624910108723578	0.487315333784819	1.23534168816493	2.48942078992276	1.77371257146207	1.36654494346658	0.400628695974198	0.356648344007422	0.405254224877244	1.03346450904447	0.0672213007645863	0.0651360212184382	0.0714190275251032	1.94570730459977	1.27644143836625
2008012	14	4.70640845556498	0.406219339547206	0.246436157874358	0.512792641801777	0.623815239547742	0.430755463150544	0.795913544864236	3.87516118271344	1.29823008361228	1.12467509061937	0.696775818998914	0.413212126658397	0.39368347295976	1.05756242686525	0.0658344485040847	0.0678290884555282	0.0714966227251706	1.81993835917274	1.35383281256984
2008012	15	5.45309515519023	0.330977118552498	0.288773130409049	0.418999117471796	0.811763867170901	0.336710144843152	0.299324363802628	5.54734640533086	1.04689365187324	1.08002486156152	1.23327501002633	0.442102893053628	0.408014587461607	1.00903165366827	0.0682749287655895	0.0674655742247858	0.0680811414001505	1.99876912111671	1.30244303350595
2008012	16	5.2819970609525	0.343752777375601	0.245962899035123	0.310961496854099	1.52271739133008	0.288891126742458	0.366037701564893	4.75203743121361	1.19232600082566	1.50075772993407	1.55579787529749	0.428124244522442	0.479890773829421	1.04724524548445	0.0734934553590338	0.0661473821010848	0.105663673111992	1.54965938550876	1.41305032205824
2008012	17	3.59384823566607	0.436416967251203	0.192079827594825	0.359909609930404	2.82866448189536	0.272160417350584	0.46521930109963	3.76481313201473	0.428566766698726	2.07088626945832	2.04818268931911	0.315145524894269	0.577511458801852	0.918807337499734	0.0571813657668109	0.0631448147899871	0.308262013123932	1.29795431597751	1.21380450564278
2008012	18	2.2436736427509	0.457099600076495	0.188956665355462	0.316908208639501	3.17946673635414	0.26994878159986	0.831673364608484	2.93198005985154	0.381805724530618	1.36506120612592	2.27812130129009	0.199299851122736	0.609797937638954	0.800774731520111	0.050705013226118	0.0615890608604141	0.700802096008455	1.14209165018998	1.56203000194224
2008012	19	2.53301633196945	0.41156004449054	0.186582146345369	0.408449861601365	2.96390980668275	0.266295772152415	1.06163206590381	2.81525288011887	1.25935702833024	1.03646940900665	2.79746342549883	0.133159734045601	0.678786048074872	0.719801394293733	0.0489705551339669	0.0651949499861308	1.00342531188754	0.823017826929341	0.957961268077972
2008012	20	3.52042370645304	0.408402923107066	0.18118807989744	0.608594175601813	2.82366717225942	0.250703220467434	0.912429121793846	2.38184663523556	2.12899400549252	1.2057712411478	2.93466236695104	0.128042484950212	0.725867934819171	0.660117027932359	0.048213385345233	0.067975888098399	0.912515147003306	2.25490029280686	1.03375472895323
2008012	21	4.40143648097239	0.389083820998302	0.179071146986329	0.723276863567351	2.72907856127481	0.241832705848391	0.840397354801033	1.72569413184911	2.38819469508393	2.02424653269857	2.51911260997258	0.172388665662904	0.883253178505482	0.604845637759254	0.0479822742822854	0.0661643038031078	1.47250316966602	2.51520742076083	0.906824239327227
2008012	22	4.31365374427519	0.309073896253219	0.183082811290741	0.746154972690006	1.96511727531123	0.230720357853389	1.42897655608948	2.06851716656937	1.74057832866336	2.37704072783254	1.76492726043144	0.216777705812934	1.28443354130371	0.549451927166612	0.0486829798877858	0.068286090116394	2.39182258215486	1.97196547524668	0.673442512628387
2008012	23	4.09309598653963	0.248497529046948	0.194504570157544	0.678608520464037	1.4892506313404	0.203341945585508	1.82973513686636	2.66914151630401	1.46131847051832	2.49881600801324	1.47859464005282	0.25345968343522	1.3472010184638	0.494530582653162	0.0482022894211967	0.0787755668219045	3.02304692499536	1.65293413019955	0.486917742767506
2008013	0	3.36054183579135	0.226030889415581	0.208547354943788	0.517700768789397	1.8021494452663	0.200193511194274	1.8080442998883	3.05184219193922	1.60267353760374	2.73007120399016	1.59157277845261	0.261369849518883	1.15998188682912	0.441909442229267	0.0459182480963499	0.0974917788857127	2.93605035290043	2.59438336021669	0.372696477697069
2008013	1	2.33498474042987	0.242484926894665	0.216960336323935	0.383045864215265	2.1582648015535	0.201238363057879	1.85240952830627	2.94891411817304	2.19477904790313	2.29373025986189	1.58656861490875	0.258457744505477	1.02096828711436	0.400321150008407	0.0472130575055843	0.102319324020813	2.40949211991903	3.18355205134347	0.320041891747591
2008013	2	1.43459188918488	0.265410040079345	0.221710957429117	0.296534350146087	1.99883151302521	0.201462989222391	1.69741911755726	1.67919675458947	2.50709809831583	1.40328780105102	1.65276935031368	0.320866684276193	0.943841310973766	0.364760374309666	0.0580790338696731	0.103596587415787	2.01987789137964	3.49068518949107	0.311670573018549
2008013	3	1.79864793298941	0.261469702093296	0.226950941197395	0.244470633456378	1.65222701039505	0.202724818000056	1.16706995308522	1.12756105050126	2.40305970187984	1.43953477908096	1.66925846364986	0.421543112821672	0.804313857265871	0.334282193686015	0.0786138952636088	0.10761250734786	2.14171209173203	3.46842329434449	0.24169277221475
2008013	4	2.84060694803846	0.248543140926921	0.231581300788388	0.162441252764829	1.17715615896056	0.217928768028123	1.06740856881428	1.09286275319302	2.46180776069671	1.49658449871773	1.4716637581211	0.448292423232823	0.637932329353086	0.306070193690588	0.107924768411089	0.113665856239715	1.63965265422583	3.34407657171716	0.21539851480899
2008013	5	3.43373093803576	0.265823142543151	0.237718392608384	0.149056078747392	0.691476293189671	0.219030981368239	1.12597475988219	1.09851833535337	2.31365906486087	1.21581836469724	1.15126925929688	0.617480216890892	0.548502691821203	0.281193204380432	0.146496993654092	0.120387908602615	1.51165860878436	3.06223406304984	0.248145183485669
2008013	6	2.52450478205203	0.314321037414887	0.236827056534921	0.149933664425286	0.526791428548288	0.224392234252397	1.00884666396381	0.873413709862004	1.4892599676715	1.18156377020527	1.15202602303998	0.836360292001679	0.515901998478118	0.260720566519081	0.164443973891305	0.130022263012619	1.85066069523793	2.77767668290391	0.268518391990735
2008013	7	2.32304552253824	0.334504252889511	0.359269107730318	0.154004587136385	0.515951335248242	0.215805422839139	0.705492582099892	0.713227881730253	1.33063956363971	2.7481246640917	1.52103918591768	0.964789849717604	0.510411979426202	0.243258432290373	0.167007002214935	0.13574085674177	2.09891922908965	2.59068709819256	0.286423030353683
2008013	8	2.25472999941104	0.344413106206415	0.384365102991664	0.189344622511254	0.456764953388876	0.207111212366883	0.580342655888286	0.649641933927205	1.43761823098776	2.87165619810866	1.79784560323236	1.08931278136247	0.483926914382506	0.228817458965688	0.21499149398898	0.134510944447719	2.15353166672225	2.09753505135794	0.339218787142021
2008013	9	2.15260956685473	0.453423232582102	0.328915896834396	0.333124272236762	0.361154239816874	0.199556161865011	0.879496009711351	0.575764034953502	1.29317927358913	2.49496723974998	1.97144977854756	1.04988781024126	0.711636745739453	0.21867908906973	0.316510041745558	0.161617310500129	1.54145743331943	1.59222480448547	0.55085135526706
2008013	10	2.47329761300506	0.727232793922969	0.232684924952359	0.590199912507218	0.345137753958714	0.195711207775896	1.3180576289741	0.554076421648346	1.42025051433914	2.37450608751071	2.03035422498698	0.852393442947863	0.839481592209519	0.211641145166238	0.362512389372284	0.232988763443403	0.868934870260776	1.3519647402171	0.743776857223965
2008013	11	2.98056692923402	0.814507426901085	0.189428259525398	0.681790825208148	0.309268987707191	0.182913447900201	1.03770774514006	0.51895087749417	2.46028881588607	2.33840818449687	2.13786937439439	1.00023312065816	0.885354183086187	0.209153070883094	0.379346507945505	0.237113204065454	0.710362275801148	1.33891085088731	0.736675674337863
2008013	12	3.32100911324419	0.631267388152174	0.191096814398386	0.770635910640834	0.339143343456489	0.239218887740811	0.897855644665501	0.543594961082857	2.34870744138962	2.46931412208494	2.03550286131494	0.871883240421608	1.97385134092754	0.207931453689128	0.404193504497286	0.232196750028854	0.642347764701869	2.27453557279503	0.67320181651085
2008013	13	3.32096957148334	0.477866465228659	0.196455268762413	0.798399223738607	0.488661702196763	0.217977809479654	0.787487606464635	0.491497371243678	1.96079484777799	3.09260315106691	1.80912037731362	0.750366641108216	1.59894174897896	0.207549597703057	0.43196282810406	0.234804792753618	0.544625033194771	2.52101343104238	0.568657571536279
2008013	14	3.3733800063909	0.391534637191592	0.203593910680487	0.656748332308317	0.565621231368847	0.218614330445145	0.947006000600431	0.396503072737753	1.9261763421118	3.46836330464609	1.76774299670844	0.685306776625279	0.744152777532412	0.208794416845403	0.431943114427777	0.245238604276187	0.428925323736466	2.46373518958759	0.427790953388853
2008013	15	3.53463522207605	0.289013545607525	0.179629746440884	0.397745037516343	0.564283221887529	0.231480274219388	1.09771244331163	0.354188381317799	1.845345880119	3.7467561612686	1.50849606921642	0.69263409664199	0.423487222569672	0.212816915613613	0.372554686830806	0.247987486088128	0.354410142871552	2.6140262611945	0.307170058173805
2008013	16	3.54763441758862	0.241613623665939	0.163088281270506	0.245770629860075	0.483905948563044	0.242034702920995	1.26876221771049	0.332359419618315	1.71067077764184	3.63170352203539	1.32870501461704	0.648516222491605	0.978670947090393	0.224033676187132	0.318669989343432	0.234866292545196	0.279201406839871	2.59923265473902	0.226491583476212
2008013	17	3.5382718706095	0.211391856754775	0.150139799816905	0.280129463007045	0.392441384901544	0.240158644936639	1.20404160829792	0.295909385325852	1.64941531589542	3.49045050988176	1.31961679919599	0.567883134125677	2.51623952066229	0.235159481472603	0.287122417927487	0.212618785661517	0.211277263728035	2.40742206836646	0.173417575236419
2008013	18	3.50307600845044	0.186573703437033	0.1415251809203	0.22411619322701	0.320369439575011	0.22349873876258	1.00050648461777	0.366999334301158	1.86771028470714	3.15677912384989	1.34361474857652	0.570908197184495	3.78267236410008	0.238087462367471	0.274148859371848	0.194609359100662	0.197868687595437	2.58849380298038	0.127100216145266
2008013	19	3.34008148042114	0.227354547330922	0.13535682493177	0.166963560167454	0.282452744888048	0.214909270983913	0.914288247512323	0.401654944529042	2.06693612660822	2.85711763066683	1.45736945267306	0.600883494357884	4.85797862921126	0.266562798310308	0.265035479641494	0.175862107274729	0.249777070611269	3.08862908618274	0.119901846765714
2008013	20	3.13445727884565	0.266420353772908	0.135412534235769	0.159485395040311	0.403452635994043	0.216839651835271	0.737926110892201	0.432090217896044	2.0657456403276	2.74012716514014	1.61091453735885	0.511611579017459	5.54287789514865	0.313460711463799	0.319018524125216	0.14723639510574	0.187601505327785	3.46746267758098	0.11859058979073
2008013	21	2.96557061154498	0.268995105716498	0.138774997062244	0.150991016801229	0.565396263886292	0.216681761379217	0.517890793371951	0.455740204416865	2.1036205865543	2.48071474953541	1.81101897483084	0.419939380271431	4.97396733841453	0.338187316974037	0.331617716683946	0.128877629608679	0.206150509945665	3.55944653998864	0.13081132014237
2008013	22	2.71108806682914	0.247482957982288	0.145633056783972	0.142765102834366	0.46254860565941	0.192789808748893	0.407793814178846	0.433869223253452	2.07190476204427	2.0801179216603	1.53762643760821	0.409907799477189	3.96477912278258	0.342628003999658	0.368135253118508	0.127853828336958	0.35035769173293	3.51770921067552	0.155034876117398
2008013	23	2.34122219624745	0.219713399767274	0.153665946038813	0.142451935682435	0.36754969201287	0.156570960306589	0.313327059109576	0.411375168307756	1.91451991781346	1.63614034412458	1.41102307785443	0.484070086043722	4.68792254846586	0.437961207742203	0.377158283084305	0.15271475693378	0.525859962901906	3.34299877167952	0.182098052341139
2008014	0	2.06125094511934	0.201558077058613	0.158815976329417	0.149514247931726	0.271582481533254	0.125929553171698	0.199024942585616	0.463270590071964	1.80040147469828	0.998762555194468	1.59331880000245	0.594865878109667	5.21497288825553	0.911277826861902	0.339324950422195	0.155689335805822	0.540204957948441	3.11332650321658	0.197601026229249
2008014	1	2.16692255177583	0.192120847756288	0.149579233396517	0.162074156269751	0.231006990407198	0.10720043200915	0.203519613182822	0.551915827475838	1.65521935351865	0.525257196271245	1.7394120459045	0.526354489271284	4.93268991702097	1.54712116636672	0.295022006909814	0.144806698253953	0.493432336802699	2.78966177973346	0.209297049988011
2008014	2	2.26669800974233	0.184943398321447	0.142334585430441	0.158298353360503	0.230795887097561	0.101355072813433	0.262046390877274	0.482369599742461	1.65497793592246	0.435978022095569	1.75342288551464	0.434138999801841	4.58550246938764	1.83277392742926	0.193324527499516	0.147476299670954	0.540528470872273	2.58149646723377	0.197207076652912
2008014	3	2.39836612869383	0.176728595656875	0.14171100652477	0.142867867612932	0.209753347123565	0.103709089705461	0.282766448757055	0.400681073125444	1.62209649267263	0.570793144789902	1.96382036375975	0.478975604402619	4.80084344318354	1.99641414750404	0.171727651535894	0.154835595579223	0.587910330402975	2.60242210583025	0.177752825878128
2008014	4	2.42791671701585	0.164037935494088	0.145134069620193	0.145846384562632	0.166383555644372	0.105868459847764	0.232891797191515	0.36704608128394	1.56343627831565	0.628352885819845	1.90170253053263	0.621214959618365	4.60521930499994	2.16200111986182	0.172600874579632	0.0985905117021313	0.462516821959159	2.55041500539528	0.160041045574992
2008014	5	2.47009509593946	0.152868617763789	0.148779622476893	0.151189065222926	0.154597929257	0.10830775621683	0.215944748219762	0.484329385869708	1.68808433791165	0.549887080641722	2.10018744353779	0.727121786068836	3.51131769628532	2.07688131702811	0.166305959401621	0.0873117210612127	0.243687210648689	2.42583440697845	0.132424334328526
2008014	6	2.57062115951994	0.179421507683156	0.149996566766536	0.128744715532634	0.190667823162351	0.106440118115025	0.228606095163608	0.468127469527694	1.80838841353186	0.398851620640286	2.49662374259421	0.742811338385792	2.36013727713202	1.84969799990562	0.158732226646854	0.0984611814165432	0.209491000781475	2.38275828655207	0.12304323838066
2008014	7	2.71359493640371	0.147601164177384	0.14956608373587	0.0987713506931689	0.188366881000016	0.0955420174648166	0.214307524033719	0.411687362870502	1.85367353178774	0.274359896338501	2.72444845709318	1.11705982326916	1.97219446296041	1.72815951612913	0.146758135006541	0.160513805160104	0.232198444190647	2.35375070424369	0.151154440740253
2008014	8	3.01249272943019	0.135264024155086	0.145960737692076	0.0900396651862197	0.189168401965863	0.0824537520291882	0.235153092426865	0.365689070402311	1.46513629121264	0.207640532015384	2.7883522317637	1.42131669256843	1.96141299428095	2.37254222505918	0.133889099646897	0.180861670870988	0.348936591961752	2.17346770940348	0.127737819444675
2008014	9	3.28814721681665	0.131912830951172	0.172059539426254	0.129935799065415	0.188631730899029	0.0770082137162261	0.307776878874044	0.34593556065351	1.17367140559412	0.215877839344552	2.84626026249328	1.33147777900671	2.00835803452667	1.54263708176929	0.127873866877544	0.198107412319139	0.410249904400585	1.72488534059729	0.0870484309290626
2008014	10	3.32057135769282	0.144902963420874	0.1624127386125	0.141399444749138	0.199204982182186	0.142581476272504	0.29040364620979	0.415706917115997	1.03714997065599	0.271266248667421	2.85584775285177	1.30643258972319	2.03953893201509	1.10484559252932	0.207607276983066	0.189065140502655	0.299555170713058	1.15778395185747	0.0993918710403957
2008014	11	3.20825329728583	0.129017984516277	0.208541173295101	0.130186621959874	0.181750839653139	0.134800260531584	0.235698113475017	0.445843135840487	1.06003861503076	0.624041459369093	2.76481792892938	1.42568386113551	2.19812624279013	1.24445893114358	0.236613169660136	0.187279881340675	0.237582714728766	0.930437950837267	0.213599281784895
2008014	12	3.379097897509	0.106559657932071	0.286384636042142	0.121899259242095	0.161715507579847	0.126301209921021	0.201594257751015	0.369729687285276	1.27058304032307	1.23922714528496	2.45221176984317	1.54677123725146	2.23961809068086	1.31839048053205	0.244628903784749	0.171682266043292	0.197658489561447	1.16666008509147	0.381667233500237
2008014	13	3.79194312533643	0.10859370932487	0.304360578213019	0.122950418029817	0.152745497142372	0.132143892528578	0.278035977565848	0.3442362454044	1.53669957075892	1.63693685883589	1.81079756500872	1.64778951874822	2.12027486596873	1.41693772673787	0.219270354522912	0.140235988263578	0.156255169244262	1.74593836135642	0.43835054450155
2008014	14	4.44608745774771	0.130263372631611	0.356079060342778	0.115573872205876	0.142647919072008	0.138831059011116	0.378757955472799	0.315768494397132	1.64949858934969	1.68975542712213	1.44517323633914	1.66368068074693	2.12544488815927	1.25862451161226	0.181594207617492	0.118589740477233	0.122936804477192	2.42133976109667	0.474933908528094
2008014	15	4.06605006598526	0.13454149675406	0.343670172985676	0.10808064812686	0.135446323134157	0.142797162605012	0.430219715692024	0.343049886559336	1.83371446371844	1.6528614447298	1.53548718228002	1.54372813114199	2.10364774157378	0.740919226918973	0.164861897443303	0.108945076743984	0.105118303642117	2.55723511297972	0.39846136746916
2008014	16	4.27993537702589	0.12526981484089	0.300810541802348	0.113770764444203	0.127769598622354	0.135585911318603	0.506845689834327	0.40659943356043	2.04173353234485	0.99971099125755	1.84178841217863	1.36340765647177	1.99845164843438	0.375421922695221	0.151048540995779	0.0774323089757583	0.0993893000906811	2.65091485142405	0.348832749758337
2008014	17	5.06129588919268	0.119490953411858	0.233597488313607	0.120867870267203	0.114842022710171	0.123262825073436	0.917110338775719	0.449214189966617	2.04016013518904	0.792531077213054	2.31266846221538	1.22612108216979	1.78651790817628	0.215902852351307	0.143398700643061	0.073817829521864	0.0965759961059148	3.16743562782236	0.32659827377112
2008014	18	5.51047981249654	0.121158776933116	0.209955640826932	0.124092968563963	0.120768671992913	0.112045795250604	1.3395140926569	0.503195102966769	2.16921699745772	0.810149476089774	2.97389809264115	1.04370685408785	1.69987070400232	0.340188874322923	0.138573124905942	0.0808321427029242	0.091588248003994	3.3738533413525	0.414749628086498
2008014	19	5.48038784776433	0.138580310603911	0.205760555021979	0.126874759867631	0.138686942211332	0.106882723508034	0.88383986746638	0.597558259197207	2.23778526719236	1.02819866364054	3.63809919953659	0.872747257647213	1.92600583403799	0.262111382012966	0.133676473411684	0.0822118057125907	0.0930550840251672	3.55774426527935	0.58834051252517
2008014	20	5.5477483131329	0.170947120851718	0.18977285224546	0.135214961966558	0.146510740289103	0.109167846875815	0.892657942976386	0.657045008916569	2.28385845410732	1.45517196826787	3.63394777993831	0.661561989937098	1.564841468684	0.554873152797924	0.125572152809651	0.0761794170371189	0.0923881624878572	3.68389504523773	0.953365969197158
2008014	21	5.30716528621839	0.190597256544123	0.192711287913747	0.145924772487275	0.162604492104734	0.122830556217396	1.27350635753345	0.652904751231576	2.40665880675826	1.53902707803552	3.24007820408404	0.496559699286502	1.12704874695302	1.38087198750773	0.118243588843171	0.0714575787919137	0.0889450648641306	3.7440731899512	1.38471787870654
2008014	22	5.63567526266849	0.181845029525902	0.1669952644575	0.146876887913737	0.193711717283692	0.126324197729812	1.89465240472496	0.660454686013161	2.52751338846976	4.09055071776375	2.64219828212911	0.462697288179452	3.34442716658727	1.23372019325878	0.11327515360658	0.0681569673676838	0.0898661892052036	3.83105377965865	2.1068565192678
2008014	23	7.14797658009821	0.172237394602955	0.153522321924533	0.148419926529174	0.228208408307669	0.130558627304878	2.34921513440684	0.698969885221294	2.61595473699639	4.39993670258154	2.35180139181886	0.499569913383325	3.2278518831637	0.782680274963377	0.111367754789891	0.0694707581365731	0.0954608948624749	3.67356403177016	3.3928356580094
2008015	0	8.8149915142506	0.15843553585904	0.145131261877483	0.133447518203151	0.23160042233671	0.14510560015924	2.75004167060618	0.666673314708508	2.52486821968514	5.7838626073617	2.41446657482423	0.541361843078074	3.73175678954972	0.360294551355785	0.112262897626113	0.0810860294130315	0.096535282948906	3.70361285695787	3.96839284998576
2008015	1	9.04977569875596	0.143300202436347	0.123682605539049	0.121233548547285	0.216701454809581	0.135031334470716	3.33769220452588	0.628193116923171	2.83977728044016	5.76422528293037	2.45788273739174	0.58122395741968	3.39047619660634	0.304651797191701	0.114906944502119	0.0926474524867275	0.0963403247798007	3.46844916818792	4.48679725449808
2008015	2	7.50473508240798	0.127989887319802	0.101253601999383	0.123123082486877	0.205657687697216	0.112345876140634	3.54538907299112	0.625858991782636	3.17020455652689	4.1595357004883	2.36951067929553	0.577868029723075	2.3467052730449	0.971193703803474	0.118177394740687	0.0905137864952583	0.103427033377996	4.05215613153178	4.39030386145279
2008015	3	5.36428805119975	0.128220031517758	0.0836953451165857	0.127550116773937	0.196648493165098	0.101727746217751	3.35863526112056	0.682460726833786	3.34830141014978	3.26980260592436	2.23306829414652	0.578494787318595	1.82967330697659	1.31533052533354	0.119079676033527	0.0815164674828981	0.110145846761531	4.34039877058523	2.93242077545112
2008015	4	4.68802792359553	0.139264836950703	0.0960410511808126	0.125808117939761	0.186418490355824	0.104159251810711	2.64400313216816	1.07710148881196	4.46003173179845	2.42335498212853	2.17755255472718	0.606598577070789	0.648512674979457	1.30205004234233	0.116136650704306	0.0722981837711809	0.109642682475843	5.55281992946731	1.18237896876173
2008015	5	5.21030827564908	0.128889667376111	0.0921727781773996	0.119348502051877	0.174087156715444	0.0984395789661618	1.70502332957748	1.34885075915711	4.58559700871347	1.21879758636865	2.39200868504218	0.61475893491877	0.549746108378557	1.30133945042986	0.110167138718265	0.0671051814203353	0.116199528204395	6.00457938561008	1.03003702954626
2008015	6	5.78484881156603	0.116929985511218	0.091217106314126	0.110499002872353	0.207974052751383	0.088337991757721	0.698083041318845	1.36833845938273	4.46847132174172	4.37289132044992	2.35891612525073	0.616869935889804	0.918560837856969	1.69118505214854	0.101033808167474	0.0633648462894387	0.113178017347629	5.95254167686697	1.3786779878831
2008015	7	5.99910295489213	0.149789013266332	0.0888801829592662	0.103592004932418	0.330344345293196	0.0838693480513462	1.81345036909257	1.67782135229975	4.02652194318595	6.42254617888279	2.25822243092573	0.561290427977564	1.2443129685357	1.72479223522962	0.0930111604606861	0.059019144799882	0.106113403686509	5.49530681961482	1.99371747853129
2008015	8	7.12128775942691	0.248305690447935	0.0914700668726828	0.0980042184985867	0.480979558666419	0.0796284448905763	3.33996706167135	2.12982518419378	3.50812049901365	5.30770242351016	2.27456346455053	0.485855785885709	1.62171314212717	1.16787793102032	0.0889974334003919	0.0647185102530751	0.0962256525809175	4.44653318350771	1.87125654094572
2008015	9	6.49814951691242	0.480995574707147	0.126052112601292	0.125015635254398	0.604917897412521	0.0850423359378942	3.47900650595913	2.18305867874201	3.74841234074095	4.50878526927858	2.24375211045425	0.432053888883806	0.929810866121187	0.459751648928827	0.0940696061571238	0.11372465328704	0.0872715909953617	4.32841719996916	0.805030209914816
2008015	10	4.22367216745963	0.529836518745379	0.227205842972725	0.147309246388741	0.611760307601559	0.100199034418283	3.74816754342289	1.46502129653508	3.51571382898526	4.17047642274684	2.24362506596671	0.37399267732788	0.379638640906136	0.377492130987611	0.184502383584488	0.140398290728229	0.0811639328485124	5.07299883990558	0.265739776138939
2008015	11	4.86942018275387	0.50971532940395	0.246479298097735	0.254317995908426	0.548099775626416	0.10557431776878	4.22790299055192	1.0873200557189	3.76384131155464	5.51853888199622	2.28727244436506	0.346513620142496	0.442211727074848	0.648158828690717	0.253241442737913	0.13652285023076	0.0825847990068393	4.62846577974623	0.516971136415962
2008015	12	4.03576493357401	0.436303580972774	0.219836931101529	0.194226021396307	0.566029568217377	0.128173098512834	3.12944266394099	1.19812571123101	4.90524118134105	4.28025606426056	2.34185769437928	0.351908345941021	1.36302513489831	0.865135210233404	0.234972529610725	0.114553975040926	0.0839760393810975	4.4402116024472	0.950849458405148
2008015	13	3.64610263494989	0.334188842570634	0.226163662203695	0.166055274279368	0.472344834932347	0.156482210065155	1.57903887549134	1.00563702559563	4.16936268566389	3.63951415082312	2.32834528909874	0.345878438872693	2.76580950997919	0.710227970010304	0.223592477281937	0.0945988073151685	0.0795102271490341	4.92906126438096	0.985706727407256
2008015	14	4.34105440929983	0.376067712818776	0.216678875962044	0.16453201440737	0.426962737085574	0.192013698794787	1.57515617587479	0.959190934784644	2.68967383080676	2.55755153799411	2.25907597569845	0.335344714063332	2.95583457896841	0.449672312077608	0.225574255436976	0.0837323952035923	0.0736985624230971	4.79046201312182	0.671926409391605
2008015	15	6.01499672692045	0.218610811157341	0.180844840478168	0.148705309477625	0.40863473853599	0.199733942293465	0.712036768391793	1.08165135597856	2.72779941019484	0.961983030572918	2.1405493845863	0.331143449070902	2.87329418223882	0.17693361186551	0.265980337324802	0.083262117502868	0.0717274405840992	3.62464988418273	0.438885331495371
2008015	16	7.31138106149434	0.188629155753004	0.149579292681026	0.204849668953808	0.330173816407671	0.147894397133114	0.284949956894835	1.05035302524747	2.62537481854378	0.878781347532434	2.1521207645881	0.357816751245803	1.41509290588442	0.093399570500051	0.196777319897483	0.0776097734427102	0.071011545784872	3.62012200659225	0.331297163577054
2008015	17	6.30830856986981	0.195258050072638	0.133228625802771	0.236158956862292	0.367203298217668	0.109316362029786	0.264338081449745	1.47961559688092	2.42552911469784	1.85317402743968	2.15846945299687	0.406319008786357	1.38552121384738	0.210593391618701	0.133037342978534	0.0794141260476813	0.107760064891266	3.37602213324471	0.154653586139906
2008015	18	6.36162343182217	0.20088549479659	0.120863098764868	0.20025524179633	0.372146677999051	0.118284722997568	0.511308617733266	1.38604233803617	2.15330100412119	2.07114051665566	2.1891615061366	0.463821020625325	1.35305992489807	1.26384102205238	0.0841680878246166	0.0854671141805129	0.21556012262631	2.95796726618718	0.052719076668033
2008015	19	6.5935941692351	0.157523120396194	0.099340985857221	0.141637527662295	0.34899394363394	0.156755692862483	0.590954343781396	1.39137597687372	2.55396640765849	5.94529830652843	2.27290036822349	0.482712740224532	1.36156740198384	2.0566224279567	0.0711858517236139	0.0917776404522768	0.228591710631883	2.44535751662338	0.0636892985789661
2008015	20	6.16513727562919	0.13959930933279	0.0904607850809372	0.0950337374284553	0.333355257301593	0.146904513925269	0.836286294112351	1.26153046268882	3.35988938756919	8.02356470735207	2.31397881969699	0.513101885229931	1.65475657508149	1.54201262416254	0.070486083112277	0.0930790141714407	0.165229391388427	3.2302701079202	0.162529503198573
2008015	21	5.67807912981741	0.13793807949713	0.0875574154296093	0.0930036652912867	0.327670280595262	0.132305867442225	1.15821715420772	1.04653904785088	3.52487284023974	6.55678839321558	2.34905684098553	0.545235781000901	1.39113787717876	0.700901587001482	0.0735772551308383	0.0967414409367356	0.168728932764591	3.6793083073545	0.138197233271214
2008015	22	4.46866847105242	0.128674852888616	0.0771516047114383	0.10236947333922	0.310346206616122	0.131196080789864	1.16252685233015	0.898569649281925	4.07285978317376	5.60459409050483	2.43882622935697	0.561641762365584	0.52571571369936	0.445453956990306	0.0770785777882812	0.0987479299378938	0.199433263505493	3.71734717947624	0.284334560504785
2008015	23	3.77240532097108	0.100632347770667	0.0751362826332476	0.101806703933574	0.30796645916553	0.155955357884933	1.40132460901358	0.771943632855782	3.71733664049992	3.79420102530285	2.58933498650059	0.59078217785427	1.09572104836033	0.359939216986219	0.0871152986594696	0.100560461241574	0.234358926121341	3.69436816250387	0.840889643226477
2008016	0	3.69039170255257	0.0597219630546625	0.0866196052047151	0.0988732402738776	0.293299688750645	0.140555861852089	1.06354369519302	0.74211252365724	3.48361207025069	1.98794127105821	2.25991440724059	0.611027211548198	2.61272898835199	0.353825898642444	0.10372937506805	0.0986325200104245	0.273392151660542	3.42514050707379	1.05024476502571
2008016	1	4.40595623009532	0.0274101608228706	0.0858959150839211	0.0985591497639904	0.268460363176528	0.131786245277624	0.775276856064219	0.682594054713231	3.1135194255438	1.49504801692555	2.39936870510379	0.632002113935306	2.73910040946551	0.323650378905549	0.155364905467228	0.0871378167367712	0.23752849295878	3.30098754884051	1.28851578570868
2008016	2	6.61183537058114	0.0281045219678114	0.0737141862806408	0.0829378955529737	0.240213190483848	0.113872378006726	0.357601752365603	0.666522236069481	2.88859612536192	2.05284543552563	3.5729116297099	0.652461960152267	1.78883735039787	0.244835716208111	0.100356976492394	0.0749700262303895	0.228488276226954	3.34635463842367	1.59573989161427
2008016	3	6.56103009392529	0.0262904994429651	0.0806698498417252	0.051253674225866	0.201782746233994	0.104627711741276	0.514677146067607	0.800072899172371	2.85629746338302	1.90308430163702	4.67885891913884	0.633778607106465	1.30141914287864	0.172020222509931	0.0989029787693878	0.0781641807705222	0.231465142459123	3.41802797683275	1.21787106037928
2008016	4	5.6313445210768	0.023627766038308	0.0964253229452289	0.0346956522221285	0.177947341010855	0.090078424951835	1.26271996248377	0.850347990343123	2.93353280306563	5.35797974218992	5.57205269574016	0.592335684567723	0.681908489986834	0.114531793557669	0.0994511263016129	0.0812655382977054	0.22445515215814	3.65752369938383	1.13429553995583
2008016	5	6.15280544856809	0.0232349138834652	0.107563346797157	0.0265000226086852	0.172359461647378	0.0626167109140024	2.63085331105197	0.821430612632013	3.14006562473177	3.56729911062598	5.95301088766013	0.535776474887988	0.414784925781733	0.0863464808910464	0.104189140231655	0.0772124197154955	0.211001501416541	3.78801148904352	1.58439019894394
2008016	6	8.65478815455074	0.0519886456167846	0.13827334735277	0.0199471478859605	0.174797888007419	0.0304870086747762	1.94014406556082	0.806689210109649	3.45719875029755	3.74476643246629	6.0639531294364	0.5493447091381	0.272676704916808	0.0862533861411645	0.110162047084693	0.0813857867405848	0.189583095192154	3.99679358377467	1.65417125662301
2008016	7	7.94865892007806	0.0962047971439736	0.155023371817837	0.0145418227638318	0.150641826977574	0.0166545448581183	1.40100216173188	0.939892518751591	3.52800009357531	5.94421379948939	6.2110190751514	0.618161153063851	0.714944096242873	0.0803346223041356	0.112165121105833	0.0805599089157711	0.187260213403332	4.43895035175798	1.6229113915859
2008016	8	7.99622196832826	0.111998124281429	0.1259172547432	0.0171588080359672	0.171846897160835	0.0153426394849644	2.67883988661218	1.05063646303517	3.22342892217549	3.67023912383965	6.37919265781379	0.665491086560782	1.38537776672569	0.0682174634749959	0.10900976101088	0.081692704519697	0.153015382478175	4.17254601291692	1.58698372008587
2008016	9	8.34057621046483	0.191177309701148	0.103126956012102	0.022466799800981	0.113589849533569	0.0150777486437889	3.69344812299878	0.98934625640116	3.16473153807256	7.15055010577627	6.56207423548469	0.700832162910767	4.4898520682014	0.0683588556295981	0.119364742723685	0.0888902948568411	0.151442960821715	3.91801281137986	1.41946449548385
2008016	10	8.36395916899006	0.444839582710652	0.0938990384108136	0.0270500065141329	0.13629181405737	0.0132747218172694	4.62779797531638	0.881959055494698	3.27545347383814	8.51321161710773	6.63886804873533	0.727435514420131	3.6789877654851	0.0362697238920394	0.192126366837722	0.100529163976416	0.158158151656516	3.96257001853541	1.28431779001013
2008016	11	8.00779922321041	0.485318576396338	0.136742139401322	0.031540254063752	0.247963075478439	0.0209179986737275	5.04362080408923	0.710189295738401	3.70574103536741	8.73205451579363	6.27646356346717	0.748222948398602	1.21407575994067	0.0379855729518327	0.180498402149654	0.0834841632414718	0.0968434259964644	4.42435979283144	1.26608208020344
2008016	12	7.0542849498799	0.428131301411666	0.220863315862652	0.0501004374265352	0.315117251132467	0.041016840939463	5.09267326083186	0.72187504960099	4.1968180615793	8.3186280008149	5.69919851001982	0.762219335609486	2.51747575025582	0.340188229236321	0.164025698357072	0.0705072911379525	0.0875088322658428	4.95263021033212	1.08154893590142
2008016	13	6.74217645797506	0.322562194952988	0.287035710982694	0.14513363059527	0.273056385413768	0.148070959494173	5.54067811372946	0.937334118528161	4.75693933832576	7.673504511222	5.52359436287826	0.733003867742573	3.61189023820705	0.108451106795276	0.156814001081792	0.0614324448782472	0.0846019840133342	5.5302568945118	1.03753987437452
2008016	14	6.84356494303728	0.277922240555645	0.277591308145001	0.259611056076897	0.415525672038546	0.244297743000072	5.08230699254555	0.839115705943367	4.84819564767028	7.88434587703488	5.54704067856186	0.708578081168529	4.66370106484218	0.0543664150875272	0.1557653300455	0.0605748201780417	0.0807801599707449	5.46213309187478	1.09561740192072
2008016	15	6.24728177143073	0.263263715489522	0.199141985274947	0.283346364299441	0.312615034820758	0.282912889139378	4.36996700383807	0.790729691503791	4.7375404832459	8.29069400141409	5.28882152648964	0.715166279130292	4.38028113791816	0.0327027378029866	0.154261221563477	0.069184496579513	0.0772068419434578	5.50348513339348	0.965921611877461
2008016	16	6.5117550541146	0.237129534116396	0.0627995131028684	0.237822971889397	0.299391762178029	0.247794391133852	4.79602593876162	0.840408030677449	4.45393885517387	9.71310757177006	5.08730509329632	0.720222147041528	5.75351631051887	0.0294137977339103	0.135972790245454	0.0502604100565861	0.0689031010184707	5.66871795561597	0.599486198712354
2008016	17	6.8527957775653	0.21187466165468	0.0358457608425328	0.200722482296904	0.3974723087375	0.197704919628823	4.86444610116612	0.928885280638611	4.21196407112867	14.4375800696937	4.97303342765781	0.675900206576949	6.07104524842325	0.0768860572999805	0.123127122985788	0.0449351766790431	0.0616813359677112	5.22933889840957	0.385439151894322
2008016	18	6.7103375596294	0.180592041350689	0.0469702792388879	0.186025842624899	0.44114584386249	0.144912471833857	5.50157293863802	0.771537674801644	4.56525409003592	13.0493642302458	4.69323372011724	0.618948304356257	3.94988696456783	0.156072149488886	0.122372224398798	0.042294852874758	0.0573004395042532	5.44557253618464	0.291454808743149
2008016	19	7.37077543120272	0.156591512746121	0.0600754818385609	0.178382100564039	0.446906913553657	0.0959190676596695	8.04606361224577	0.644936762420074	5.1788187787259	4.56419052762591	4.49297567835803	0.565389578909465	1.8900199968537	0.258058780782549	0.134351752626319	0.0408700898669732	0.0544051518028776	5.81456320912201	0.274140564191194
2008016	20	9.95952824194655	0.179986484332829	0.0561041623370193	0.188225245278388	0.332548937153832	0.0623443633046892	8.8063186605155	0.746352228570597	5.9996952851074	3.0607668338373	4.20736683997317	0.515660990094311	0.369388073031829	0.299236475577441	0.138348013296841	0.0386347676549074	0.0508168409927981	6.32667872777547	0.264212265260816
2008016	21	12.5600348587612	0.214087030728838	0.142537482572028	0.212433993119224	0.253876231755991	0.0531047392713696	4.4120490419049	0.955886152089429	7.26667425223655	5.47522611441385	3.57317020830894	0.449067299657435	0.252119126513376	0.272452632297765	0.133494049480781	0.0365948199067992	0.079973518146673	10.1372108920124	0.237852185266085
2008016	22	12.9389149899285	0.24883006275707	0.132263520917284	0.207577470816862	0.212411748580557	0.0528436695500504	3.37438101138683	1.1138328084112	10.1616176241663	9.05053540730221	2.85863975482328	0.412424714837886	0.159659189374402	0.49314483275462	0.124338596751676	0.0362611932217827	0.124613501342314	12.0830534463521	0.213339545927044
2008016	23	11.7634602503558	0.310542459340852	0.0628384175299962	0.211525922423809	0.188352959613948	0.0495218151879458	5.45282382740126	1.16966747714631	11.0131207245321	8.10310095300115	2.52293245050819	0.448162667265926	0.256402159107718	0.646957841183358	0.11822519164283	0.0426866422155924	0.146839650361241	9.51506175822493	0.193383088940471
2008017	0	9.6667560804014	0.298475081727283	0.0946385949381573	0.207924348583919	0.188837956225591	0.0448557643683888	6.44215180306601	1.05537001953193	9.49697519210551	8.82274103872171	2.75608804456867	0.459450295139211	0.338392020732689	0.913893081605002	0.104453190516961	0.0630451080905829	0.166790156440399	6.87061756833391	0.173290318002084
2008017	1	8.62694194933512	0.226717880057922	0.182940501815865	0.204723301213381	0.207827734308323	0.0465066381520236	5.76121527738243	0.987745674638794	8.41059769753923	9.66141352788014	2.56636882179382	0.47808434351188	0.320729244587567	1.26970465209378	0.0989569754648056	0.0817063075943963	0.181901573455278	7.04076979913381	0.153310731564769
2008017	2	8.24879174128587	0.193176654066637	0.343890631787829	0.192894357213317	0.231385206084993	0.0559916243175924	6.53021943567621	1.08006268284155	6.75109800230048	9.42503163607757	2.17502909068185	0.501560610798905	0.3477767522471	1.33863711277119	0.0964819971389217	0.0896031524219794	0.186244582825349	6.68492187242643	0.147302771136651
2008017	3	7.96123985875977	0.164162211658588	0.403544559086249	0.151939868157743	0.261039025026874	0.0685875097748223	6.86377440466817	1.76840935491996	6.04169807621545	8.5681214135922	1.86824265313946	0.520441628830236	0.676124737186957	1.30358648640597	0.096352138280521	0.0911553340166816	0.198262193216436	6.73508257949793	0.178394284676201
2008017	4	7.38509163405695	0.11624973677164	0.392809348985016	0.115691928710344	0.314623579202072	0.0699891872839464	6.48882262379646	2.75627549319625	6.48642027094338	7.29507744270522	1.54365740840235	0.501598839579782	1.80706504787341	0.886187713353995	0.105068634806442	0.0891552607139509	0.234387654835469	6.87611836567021	0.262392560204904
2008017	5	6.56733375940165	0.0793283656431185	0.394022556290016	0.0570049413430611	0.344867580669422	0.0651966333247343	5.75091335864324	3.04756841538087	6.93429612652355	6.04803508571463	1.48692283375288	0.482714692621862	2.68538404177918	0.756740898214135	0.10449288476422	0.0865151267894743	0.275273735406615	7.69263998350657	0.253065931862016
2008017	6	5.85954565980716	0.0981274583205159	0.203955001257874	0.0465715019972352	0.320620707547574	0.0623986114361845	4.89921597661321	2.75472375886854	6.97164846223586	4.97083316434761	1.80274422970197	0.541945539852771	3.76028753357671	0.667302447435725	0.0983381755586023	0.0851807149689453	0.274369965507381	8.33515869917088	0.256845105835043
2008017	7	5.6268463637817	0.119935564659373	0.135550637238842	0.047643321318999	0.280587587506552	0.0638540043862127	4.10881141127942	2.61587951815011	6.31024016596724	4.90977897909252	2.16536109020977	0.606136662843303	4.43199674072207	0.583358828820519	0.0968367717292715	0.0851816776365163	0.24765123433716	7.82610457914266	0.242982157459129
2008017	8	5.40112995198769	0.13370435053078	0.227465252422409	0.0523616594304023	0.218665541661783	0.0644507966094272	3.35118499385231	1.89601212548257	5.53495098030154	5.35287537552396	2.63302684505843	0.617081337201396	4.3119744958994	0.524179194380265	0.0968496351369969	0.0856092662868261	0.220770920193575	7.35521377747617	0.215603948974564
2008017	9	5.16833755529744	0.181561520510253	0.292354352859946	0.0668467616350495	0.183147887614344	0.0722760725737754	2.9012262607019	1.36901340407184	4.54117170656486	4.27927882341687	3.21444242623765	0.623278347094685	3.77483305574158	0.569832178214916	0.093023844385348	0.0862266163763086	0.233678014096804	6.42219735240231	0.195449966139476
2008017	10	4.86795475789643	0.216861078674785	0.33137629087266	0.0786060148440133	0.157536653421339	0.0644560525610173	3.01010896915269	0.954158465274338	3.93310223045825	3.45708665831873	3.38695810320929	0.613624194307827	3.48385647672098	0.548471828740826	0.0849445734166475	0.0883948030493316	0.255663769176676	4.99002736365628	0.529412156590188
2008017	11	4.61420600791032	0.174694149706107	0.450127409871611	0.0824337719457645	0.121322406917064	0.0496757719315281	2.77722603055067	0.816181291168912	3.62191744240644	3.27831099727849	3.22082995898513	0.577822477360401	3.40494751421591	0.492958955912872	0.0787075875410111	0.0908517647114697	0.268138554251613	4.46886253107792	0.758715467027339
2008017	12	4.17291525418268	0.17408549488066	0.60268417225164	0.0937228168405849	0.0834526300829385	0.0371448616400267	2.56775134200293	0.793250076385998	3.45834390232314	3.16234881043413	3.02942962971511	0.547401610169023	3.1947016189863	0.442534149035814	0.0792148711569047	0.0856575475809203	0.24939002054691	3.91631219667949	0.515449579017535
2008017	13	1.96190844651977	0.155389934959383	0.573766079339616	0.109364501399084	0.0716296053928291	0.0331458459501041	2.19707833172138	0.689649457420719	3.26544751746652	2.99303205363457	2.80845165007409	0.528761644470068	2.77586116323239	0.413166128211129	0.0821565833043311	0.0765823380846652	0.239175422744881	3.39611292199358	0.535065714811001
2008017	14	1.1848679260701	0.282408269851616	0.533020231856898	0.0877767207599481	0.0733344461347704	0.0579832286695193	2.01570416096625	0.378349226681333	3.20384385981811	2.65117207815841	2.4594764862268	0.535053809938719	2.48304994086302	0.409595259066528	0.0913794998406002	0.0761797045048096	0.277098212616982	3.12770044426702	0.650051735895981
2008017	15	1.48609131430251	0.255771563385889	0.706955945348161	0.0686530856166494	0.0928945603763145	0.138488703160592	1.70979619550756	0.277067758182289	3.06452248059011	2.03603204425711	2.16253875271357	0.541946865729959	2.11913974156543	0.422077712390148	0.0934689823823548	0.0751422742959279	0.22484277920831	2.86755267681376	0.919699845474667
2008017	16	1.84885865143343	0.173534614978499	0.961996828305751	0.0534352232565508	0.105524167539273	0.190326971003622	1.59838116625189	0.406597619504218	2.91107602842317	1.43412768913083	1.9594347361344	0.557683738136636	1.87686632263866	0.464330496143403	0.075828998677538	0.0716860840703649	0.148334257474519	2.78642933736392	0.145655862923025
2008017	17	2.01686710846797	0.208357805015084	0.867410477568936	0.103409150590845	0.103691766051158	0.163961060981596	1.10602920629872	0.357395773988724	2.26342976108378	0.70776098086906	1.75695178776932	0.543771999738015	1.33577084697044	0.51105771729999	0.066805969592558	0.0692976564318603	0.120455332968161	2.83883382325228	0.402265852247861
2008017	18	2.16924543189514	0.232553979839252	0.739862968276147	0.181301470774222	0.10614687626063	0.131399819163297	0.291098964864833	0.236869752413502	1.13759673209733	0.263929209834274	1.77797406856561	0.500366006281605	1.66851111641707	0.548547087634714	0.0685227787304435	0.0631250928374964	0.117022999418925	2.83154919317192	2.4989055990961
2008017	19	2.28562073219292	0.204752029184635	0.751055847834809	0.174146912933139	0.143970468086242	0.105111261033511	0.192320159562085	0.368364544357933	0.881383872769313	0.296794388540574	1.69079723234321	0.458702133113019	2.05724455386569	0.594096612744765	0.0731490425588239	0.0584038796818284	0.110655985904022	2.2372108790558	3.63642629742843
2008017	20	2.03907143716667	0.180224234017412	0.597747194673226	0.18236573563549	0.183867313915259	0.0750261952376806	0.25185431964259	0.447496169890147	1.23270047667724	0.564720009281845	1.53215084206071	0.449479956451937	2.125398879226	0.669875507238417	0.0768758449634034	0.0541485253440779	0.108539109492924	1.11699809265958	2.89583397572729
2008017	21	1.86378952115979	0.123871348058325	0.264910001447115	0.169232681054262	0.171829778882253	0.103101609271929	0.269530733790725	0.473132976473639	1.27874832580728	0.51702836384097	1.39771345157885	0.449475871878472	1.96139592090297	0.760749161756287	0.0787219861427015	0.0497144421585184	0.0892624464034629	0.606038175231344	1.65469159247272
2008017	22	1.98022453497487	0.150013070478163	0.107370423014068	0.0923236997422632	0.183731540268383	0.196062299718006	0.221863715507105	0.445077943211103	0.452562287589628	0.480233365288517	1.19175760292987	0.440267394381819	1.51828447183985	0.834786205965029	0.08345320028696	0.0470493342833293	0.069263108449005	1.41760178993776	3.95746143216381
2008017	23	1.64467938009277	0.154249902478189	0.0703316211406493	0.094763438931001	0.180544283139745	0.27475117677996	0.213781102771508	0.370887403257431	0.666470085628277	0.39280591506924	1.03140652492204	0.391219678848393	1.16777399014372	0.710025016217707	0.0893202460374961	0.0485662090331051	0.0626049794606381	1.36232902438214	5.80494437413679
2008018	0	3.57232552315087	0.215769849611614	0.0700175170708134	0.13417923978541	0.155010421753051	0.268330527733688	0.250914965238149	0.298246095555627	0.789576604213428	0.231078047482073	0.845141643424402	0.345377278216466	0.764840219939499	0.673989033253007	0.0927748355306136	0.0550131671845263	0.0640670001917734	0.693898118116587	5.36786220974192
2008018	1	4.16937792097735	0.682740801009027	0.0769317023990903	0.142449145872077	0.112646583716663	0.22184556463404	0.20188341323185	0.324519968704058	0.941669518928553	0.314652997142766	0.788693893120646	0.334404643459078	0.531075829083531	0.627514673085515	0.0943904841037627	0.064618210106856	0.078975905124849	0.356008552215819	4.64206727169647
2008018	2	3.90592381172072	0.406479471365637	0.113855823150711	0.126263647832236	0.236271801805634	0.140046689451052	0.129872283034073	0.327543268037687	0.956384498372774	0.29699410447386	0.71103794803824	0.330388370289954	0.536885259978026	0.599590243491193	0.095166980323375	0.0716902519602748	0.144401662237312	0.391235908816791	3.9191812941492
2008018	3	3.70561908869417	0.0411706410579507	0.260769265599718	0.143283974827594	0.0891740100847273	0.076020459437048	0.0911867506906612	0.688543200293784	0.8326652750793	0.17299102980595	1.0563859799853	0.285689040486066	0.595563620739078	0.586102570229066	0.0967036058950349	0.068623411117851	0.164093867847091	1.01326698970791	2.84321567282932
2008018	4	3.44174203485464	0.616566612345346	0.51933611676337	0.116626603995645	0.120383047782789	0.0359625951344383	0.0811275508490363	1.9809652720733	0.973823564353175	0.159160918267412	1.27601268490466	0.25580321183789	0.626645266751846	0.56758966866195	0.0988162163737885	0.0628709067238084	0.128156088960448	1.1678465518759	2.13466244086061
2008018	5	2.92817077369289	2.18320751441932	0.723841414338189	0.0616332525158405	0.605657336984118	0.088687467852113	0.101124868638774	2.42572183040091	0.649461850736864	0.385633946952442	1.42272193415907	0.251546715368205	0.629355100950429	0.544660387672357	0.100355057316654	0.167922242287333	0.128477176780721	0.946184855945856	1.99108781324633
2008018	6	2.66493534214386	0.852923918968255	0.596159222597907	0.0160496596462224	1.04217809966179	0.402824823520367	0.184807352303593	0.851714730392655	0.381433848059722	1.72901040713952	1.44200441625392	0.242912548151287	0.660142614017335	0.52898140420201	0.100792912408513	0.0836984385619421	0.122997776198092	0.797732089874207	2.13579461459445
2008018	7	3.1097608891148	0.308296716175434	0.764744902181966	0.264467557119516	0.564226447846331	0.52693937852045	0.612445155052858	0.528016148677737	0.363970555945534	1.36347164607408	1.4216065728156	0.203027237252906	0.738488873138234	0.549297135730733	0.0994655562887119	0.102054741127456	0.106487546493563	0.623880287990144	2.06471703662185
2008018	8	5.49996443249178	1.62564549280913	0.729529603531113	0.548417932340389	0.291352985738451	0.479360057629932	1.08977073608261	1.08360733552805	0.407261164184422	1.37665026034544	1.50236330516574	0.217577649365078	0.764678028598037	0.552746655461357	0.0949968731562129	0.074822815025963	0.0981807286941081	0.494104929205506	2.07198251403309
2008018	9	6.02245763148024	2.23066256891235	0.531766981947521	0.40822852706417	0.338062012004185	0.299455375648139	0.976466798546105	2.73932376838945	0.456627886330393	2.13514563502807	1.57351844591468	0.177806225901627	0.736903019997853	0.536568319004948	0.0898059082657057	0.110996641161067	0.101941547759729	0.437315578887474	2.5382578257399
2008018	10	6.85449802623496	1.72040891337669	0.565400991023462	0.226137711921041	0.37635249670029	0.210469914748133	0.902612093904994	2.61978767876988	0.588837792488248	2.19286186561547	1.53627650027905	0.141939283717031	0.707762082235664	0.583544322640551	0.0853684933417465	0.343400054996803	0.11362800394125	0.446619358882578	2.76498432095613
2008018	11	6.92681041382087	1.36183465385056	0.864437751673669	0.855350646790646	0.360383344221579	0.764625977590026	1.61533743491796	2.27571769771943	1.19943063948403	3.06583797988408	1.3816042849634	0.147323311834992	0.696030891416005	0.604773544557688	0.0801496716033621	0.204206154828459	0.120420043736468	0.479377924785507	2.71086628289094
2008018	12	8.04046503337635	1.30579120978236	1.7052953858742	1.34148528586431	0.751329036292339	0.847112795450071	1.79175194964679	4.00778431968477	2.09278534192904	2.99623107098977	1.19831347985085	0.145677134757538	0.712007159490912	0.589975683030082	0.073309805847403	0.114976675349732	0.110738447143727	0.491460447131048	2.37515422816974
2008018	13	10.4636885812275	1.2280262217522	1.96123844011761	1.41241027785828	1.35898801953441	0.425846756971074	2.29117330690894	4.62317721628456	2.25993079752463	2.28239783668856	1.04174139754834	0.138470887422608	0.718778957393112	0.53201918547277	0.0681190417638762	0.0897561218971887	0.0894314128615627	0.55434132486566	1.9496968057951
2008018	14	11.042778056507	1.2955073708802	1.63407943839485	1.32822328395771	2.11393781009861	0.262202751741971	1.98007058089581	4.55881086550844	1.78517335001973	3.04478928923228	0.865412297705053	0.130556328697042	0.719919603690629	0.464267334751507	0.0645031159123312	0.0882660212912709	0.0614894165627585	1.41747206992077	1.33715246784827
2008018	15	10.8763169238881	1.40043531049823	1.18620859070619	1.04353001476807	3.57054311767267	0.426595981417097	1.92520415139794	4.81014406789425	1.66236527722112	6.61413473109425	0.761638095013177	0.127260231197969	0.65755219105245	0.363741595354048	0.0663208480593376	0.093865934769109	0.0686387489062343	1.78160784442882	1.03212691201097
2008018	16	9.03524195317879	0.952193821206118	0.908676069621943	0.808615560299226	3.48060666482258	0.520460196451721	4.04803391968866	5.9951465596875	2.64429103612752	7.47551308331786	0.719200279851838	0.124440668537772	0.563656847267397	0.244560484392813	0.0702132389055798	0.120137845519659	0.139133660991467	1.60619277014675	0.278453109284371
2008018	17	6.78487610351164	0.857755863513159	0.881259207154975	0.732883779562738	3.09700118686672	0.470116171119967	5.18064305386751	6.71745491874373	3.55718602385454	8.07146958135663	0.798640524870682	0.124327816933484	0.529335864226154	0.148190787137594	0.0688560046114331	0.144664391847385	0.232423088718828	1.77733956180957	0.205467427178918
2008018	18	4.97302810770962	0.937339935195893	1.1400030121058	0.764217949224524	2.98436108800063	0.373877692288532	6.26397707024093	5.77848391438056	5.69116056453501	7.22572202827106	0.779425440430298	0.128113908131456	0.620269732957234	0.11410681211488	0.0632093972536587	0.161051659530484	0.325834641987061	1.8499743044634	1.19136519938226
2008018	19	4.46061475218904	0.756286278288318	1.11468764670928	0.526560540693939	2.02759008002676	0.361743378004004	5.3110767313137	4.25454453657238	7.31227452131204	3.68469706390646	0.905111129596936	0.147513342886749	1.32934447379784	0.144291924611791	0.0560729662272122	0.175176545093843	0.901085618555426	3.6331511754429	3.08102262178802
2008018	20	6.72300050925007	0.515634229633045	0.877964708334106	0.535401677874255	1.49980368459627	0.307577889841219	2.633062315066	1.89178343961126	7.06676542739394	1.78539619735843	1.21777813773411	0.168247403340306	1.77609517674554	0.190156787943888	0.0508103444624747	0.198080868710739	1.35949357751434	6.02946883890973	4.38181775112197
2008018	21	7.47361600289655	0.712038018553266	0.769398905057809	0.560203225411506	1.14780760141465	0.275238998171173	1.28290437555593	1.02803690570292	6.34713905077446	1.81580477490017	0.957432242521207	0.197914480306344	1.87132583736786	0.150297471713004	0.0575623358728183	0.23412563374565	1.28651709493622	6.34964223174014	4.55527501459009
2008018	22	7.68859251923815	0.266883546225915	0.656578878957842	0.440310211817906	0.82702649728617	0.821260547626394	0.726661288155801	0.865116995602921	4.42104269087768	2.76177288426213	0.649672076889209	0.212848464302109	1.85353646854182	0.210714512308988	0.0748295397525864	0.277464544590251	1.35996540994516	4.97100915681587	3.82259099236104
2008018	23	6.39866208328053	0.473438421218896	0.537990163230913	0.533783399445582	0.479054962983614	1.28884870254987	1.38263201997471	1.32667968553892	2.87350537157951	2.57352336942759	1.07451952329779	0.246101250136147	1.16535198760608	0.153964242905054	0.0859352247186761	0.309195027105114	1.00085813061726	3.57935340870693	3.95705225568478
2008019	0	10.0601095084559	1.03731922668749	0.458258946476573	0.292899150262751	0.431515521761625	0.769684737929852	1.21313823159844	1.68286700757992	4.4583166973087	1.81178173570055	1.29330029932073	0.312665610029572	0.393412893318038	1.95341492673102	0.081616402644434	0.32971405298538	0.562729367442681	2.68291507940748	4.38894391247685
2008019	1	14.194870396763	1.58566008575263	0.371316819622866	0.373097795257754	0.574328380072324	0.64770115120327	0.518580854036589	2.35367226948202	5.3124727417099	5.75614819072239	1.92711783653833	0.366563627226805	0.580598474450297	2.34314275620095	0.0739657952443712	0.350254078387897	0.521914807959929	4.86307201962261	3.99422602026574
2008019	2	31.411146814715	2.3563511249888	0.22702381926374	0.787995274723712	0.67509788901823	1.02094034784978	1.07016561527009	2.63138673206975	11.1610522137023	4.62175066938302	2.6517002983121	0.345421503885341	1.39158508723529	1.7841813947292	0.0757784110669277	0.364515281100657	0.527517925714486	5.93690104322523	3.80893289097369
2008019	3	28.7566303150905	1.21581342497669	0.269057917882881	1.41929104000544	0.925941772440628	1.60169003314998	1.93607164405854	4.89844330468994	12.7638897933959	4.96019476389071	2.96293087648161	0.408021882702242	2.60791091840899	0.936451847642572	0.0883834365491106	0.247959561049538	0.485841271534963	8.5460503042873	4.05011646601232
2008019	4	19.5416717366858	1.56528641511296	0.737250976449012	1.29631356281537	1.25690993298667	2.12277687103638	4.14086083798579	3.88970487823139	8.12272741084651	9.19905069560518	3.1725627332552	0.421404635522206	4.31346932749428	0.527794748006092	0.105489634919567	0.0835843760260937	0.268314707681148	8.75796879876823	4.13529676762835
2008019	5	21.9313609853033	1.26957482223858	0.437477861318947	0.796488965452492	2.08641465125772	1.94261228609833	7.13963876727281	5.29648664478238	14.7604247689645	17.6652405400287	3.28253663767467	0.401899049123804	2.83971608641525	0.306983110548908	0.120813142498473	0.0576754664263555	0.170700338223275	19.6623582261676	3.90042827966243
2008019	6	15.6571415024559	0.665543776221156	0.437489654745562	0.881170212363655	3.87313109534955	1.48031453502424	13.3617420624778	7.91546435418089	17.2446470533476	16.014061029705	3.49618777585953	0.415004296274212	1.34631813061884	0.272460096459339	0.119544840522521	0.0631620192821022	0.37739296065722	19.2666788010697	3.33926088353565
2008019	7	16.9571015386578	0.203345278667376	0.485196985420802	0.310130772066866	5.43420449851898	1.28099958329824	12.0808241559312	8.75511808249331	15.4807995401708	13.3723628574839	3.15509412807064	0.425167987419991	1.76898758343873	0.188407525537377	0.149004051335379	0.0454137924775966	0.390125005546078	20.1996499346251	2.86842206145712
2008019	8	14.0347727048886	0.0915155829999507	0.44325098431205	0.198177368711874	7.11606257483737	1.02260846553349	10.6777879422411	10.4796198413182	15.3543693393998	12.7258846054091	2.98386212765542	0.430655877418575	1.05004697014234	0.201996553325275	0.330836610209324	0.00567000702606717	0.611696411524554	14.7125196438289	2.42301798681417
2008019	9	10.5706657729192	0.0693246085304311	0.350747145594829	0.255366396862982	8.22902721016333	0.600254748463001	11.2358127065575	11.6552225040015	15.4802640175158	12.0282448502677	2.50312182825053	0.431679947716301	2.03537125311907	0.374640756526015	0.562084891936272	0.0199946875699291	3.77547242728049	10.7394499732847	1.6987761192228
2008019	10	8.81466116199051	0.241089346857452	0.31896014197583	1.40261495433022	9.64481622381541	0.300382294078795	10.4712650522181	9.93014130747979	16.524087067841	11.0867415719127	2.6764145830511	0.456436640265851	2.23514717056368	0.607854923273528	0.448190370990519	0.175100566083317	6.65100853077139	9.2762916385543	1.19812806380633
2008019	11	8.19669039922716	0.805111955529762	0.29241705349623	2.46628672889016	8.92599964929438	0.187069751157257	10.4296248138855	7.72471773719105	15.2295232717721	11.7768397272278	1.62813048199982	0.544389001960826	2.97645042401835	1.79605080921292	0.214199666599773	0.320404483345167	8.30000946469879	9.00924934620564	0.713923859939358
2008019	12	8.42801968392083	1.53671814788057	0.307282574931032	2.84235699161687	6.92334822679102	0.128042712435665	10.1430360699267	6.69503228886688	11.4746207879923	10.8946978551476	1.62533618078059	0.621302326541269	4.66142190038268	1.13737489521939	0.120430365626882	0.225547939906666	8.79617635731	8.2312035992863	0.361033390852261
2008019	13	8.78172150890312	1.91623548332278	0.295296495493936	2.44426215927066	6.12572503677569	0.0729430752164407	9.98045199168094	6.33809508913678	9.49515586088252	13.5149035180152	3.48870409800887	0.794793108642295	4.77989830339765	1.59025600589458	0.129079654227651	0.152145162995822	7.83701422841292	7.44075939252306	0.225374849297287
2008019	14	8.4147447639986	2.07035441150284	0.262252750175661	2.77980469750946	5.59514441795382	0.0368239467686799	11.4243869360744	6.85509007664172	8.60170238163236	15.579773381425	3.96747260029353	0.805527346468776	3.08280588427779	3.4850349276817	0.098815991860542	0.116883197987333	6.97684006022268	7.96466581127162	0.340171445016134
2008019	15	8.15815931607719	2.66626650156509	0.250589989769399	2.93863795748505	6.19972927498169	0.00833526185714348	12.4699081007308	7.19759021927977	7.86472984181956	14.2532766762751	2.50631677260924	0.744043624261644	2.63255879004017	3.44279227964965	0.116017045185379	0.0679133492761672	6.76537470729454	8.25250753514463	0.668044385648374
2008019	16	9.98802651712829	2.96016821949057	0.445455714356744	2.67370349004121	6.62331781372657	0.0152455780922249	12.6532359211717	7.45103001886337	7.42610029788725	13.0976728660217	1.32659501901781	0.621916898957397	2.84517585719305	3.74528751179938	0.178117198041698	0.0489675615783639	8.51484308389025	6.59394267515299	0.990767097032439
2008019	17	11.6209706920546	2.79891192305852	0.611085846968276	2.36635400145808	6.7064506224756	0.132926225398961	11.7040452754852	7.74051372323214	9.6826068059692	11.5039997835052	0.796656581481348	0.744912257242982	1.67703409610043	2.90138127492115	0.240048918799846	0.0538090135655318	8.55772375641246	5.44957281847164	0.934284800536366
2008019	18	11.0140884598171	2.49522640203762	0.577902363007879	2.23701891551407	7.02753023629685	0.463297919979495	9.67204085157192	8.55760494854204	13.080982667349	7.92666411550394	1.1394843473853	1.36409661381488	3.46190162509763	2.69408075209903	0.261897845291534	0.0507686938945446	8.21673057674808	6.82398627214386	0.807547136447329
2008019	19	8.08477048804968	2.33211949562319	0.432627156650744	2.54235726959441	8.22387527570372	0.800560575119286	6.61284512383002	9.36216567379088	10.9742703366485	7.71615957392497	2.08034800546365	2.80307019359743	5.25569941781333	2.72883433989464	0.197699956367692	0.0395543830861769	7.24789427413606	3.45497654311406	0.704801001369675
2008019	20	6.64159020913674	2.24020553017946	0.242752252378789	2.84691042333369	8.62967698770634	1.0324753422068	6.47151911881067	9.60680829946151	8.11758681735513	8.05085437633402	2.98518579131035	2.74117625931008	2.82056898208117	2.26799880345945	0.100329527275321	0.0216955522070307	6.97282337248097	3.68142445730983	0.71642646368128
2008019	21	6.55592264292717	1.89355470512968	0.181370267526867	2.45377425425555	8.33713548010457	1.12134633741926	6.11406241222267	8.53130909305401	7.31033912253056	7.36638637491922	2.53504302988206	2.19589041794139	1.28141164678155	3.37703954797072	0.116520744849354	0.00926749109845339	7.16642097860588	4.81267927471394	0.638334668446322
2008019	22	6.82982599886954	1.32002956737777	0.139747604693968	1.85168877454615	8.15209546761039	1.09035224816912	5.84674268728931	6.46769849134867	7.10613405778075	7.7953983383662	2.64772036120671	1.65511819433887	2.34832594512169	3.93913978643205	1.09212632299664	0.00353615635339229	7.84641014520798	7.53212360141939	0.548430789058933
2008019	23	6.64480706856924	0.913647034588279	0.110437223458918	1.33242921001651	7.26426465649462	1.03822430123668	6.68743865603837	5.51081365558824	9.62039208344476	8.04704618358016	2.97079032927353	0.790008315911178	2.61537823371873	3.03038553887752	1.26950446402253	0.00309750214965166	8.48080058620798	5.92179384166772	0.344783863615889
2008020	0	6.42850567786064	0.657641433141462	0.0943438644345754	0.951419247280794	5.61612889079717	0.976393146191461	7.01342907563115	5.20923638441951	8.15640547488066	7.23177515207034	3.51748243231542	0.918275122410794	1.3677506946775	1.70223379427326	1.35217932241151	0.00728332945782847	8.67541068173915	4.25568505769063	0.0605562959039982
2008020	1	6.19544472200632	0.578510138694108	0.0977545474443607	0.741208261824123	4.87823532236924	0.872131768059412	6.12675729731756	5.13235223481955	6.66840893443018	6.11015315391647	3.99325227553038	0.866335296972181	1.47325733015941	1.1769245040428	1.5076460130473	0.0212020709492855	7.621462895635	4.18191260698218	0.00605312001319102
2008020	2	5.27403981729366	0.675355097418153	0.10213489946245	0.649295335383054	4.66449304438449	0.677963845371203	4.3290734106416	4.56636400002726	6.44580402819821	4.5284992464203	3.84348025821221	0.42258313483251	2.51477262331421	0.510057588290277	1.62796178672935	0.0438696783089191	6.02918159594029	3.88271715234315	0.352329386084071
2008020	3	4.24062676881863	0.841084498209806	0.114935020546477	0.764459050566788	4.19823693711923	0.624963409960112	2.53311078070219	3.91217900210323	6.54608217595273	2.85932469009611	3.47906485635295	0.14657793553029	2.46058278257695	0.429211580009117	1.46667256815679	0.0717393145052142	5.58987137134944	3.52928262967273	1.51812994165146
2008020	4	3.67494361598716	0.896041751879858	0.145343183054402	0.643833911296281	3.49515031982586	0.596570252347788	1.80821497371719	3.40312784885047	6.59471615582989	2.32747490755913	3.34416504406571	0.117975494368969	2.38514225383744	0.416764600269461	1.21436133904616	0.100103004870069	5.81050044002075	4.89691803108903	1.60198816571143
2008020	5	3.44108655140211	0.800386493149852	0.157915007843674	0.60274641607354	2.71245754378219	0.540981589042456	1.95745804395234	2.88860132000591	6.1124986266459	1.85524877555496	3.54458300061379	0.131946200187333	2.07763825888669	0.417514808588809	0.982582274952071	0.127697225393138	5.73558887061299	5.81184692217286	1.35279679571097
2008020	6	3.27484108829976	1.3507975185631	0.152363385165419	0.473300025859668	2.21188629749795	0.287391367991283	1.81613013882994	2.55345914316746	4.79703595064227	2.9799349209618	4.02504246315184	0.132405180464699	1.80156666408104	0.433686197837703	0.82784445022567	0.157148281604377	5.46525844989759	5.19650693728045	1.72443943716268
2008020	7	3.32125150632554	0.787628422489545	0.165300863959576	0.413340051811029	1.94633041657055	0.217008632684885	1.21021755342841	2.46601828229109	4.10404142159696	4.12278809428981	5.1904410853691	0.124684217020766	1.84082500883161	0.428296690382285	0.733598096790442	0.15661360708768	5.04706432300853	4.08254490450416	1.95278086303411
2008020	8	3.16022440291033	0.289184948378406	0.257699889442637	0.418949972511781	1.7231465800256	0.194013815851554	1.08419103957415	2.13045170581616	4.05014893681779	3.18301440138827	4.88595063418709	0.106604573366866	1.95180695475202	0.453188755967807	0.721354808837027	0.0410668423647937	4.65774894632048	3.6151229934537	1.84720912935469
2008020	9	2.96869437381851	0.0890329059302272	0.385411711488436	0.518564400689208	1.40848383670876	0.0284574002661884	1.76250463365849	1.87158596359931	3.40357618867227	2.39412975061822	3.1431014977905	0.102069912218639	1.98138605127112	0.609968532569764	0.708950467512514	0.00676019486386254	4.31786212782616	3.67508094335371	1.40204874162709
2008020	10	2.79195777749574	0.013632686585864	0.451115670120877	0.777703320963629	1.25654576713379	0.00998113458928685	1.55456570663963	1.99745804964952	2.61261042406922	2.18620637206058	2.38761805407664	0.125648136412148	1.76914140424081	0.675606495227341	0.682013333905081	0.00391746438920005	3.93369280611822	3.41258261118694	1.32794828050354
2008020	11	2.57240371269985	0.00349221439024223	0.370235052561514	0.753127946260004	1.3255082640073	0.0697397611484065	1.54441342231938	2.30620123904385	2.98816653915586	2.04585236236272	1.74322053284363	0.14691404061696	2.21340958772768	1.25644438744413	0.659091241443797	0.00190037826162149	3.4926357900995	3.5348879598625	1.21882196848941
2008020	12	2.33780776039393	0.0027309109313537	0.373495923599577	0.917888869430516	1.77559128208728	0.144662697845242	1.53222486436436	2.50867846606461	3.29501509981183	1.89466366771239	2.06015023288044	0.168288200725207	2.80618121610302	1.63509989919292	0.632846350966115	0.0181264686945398	2.99647619280282	3.62506844970456	1.02153175640282
2008020	13	1.94940009375395	0.00255091018682252	0.324942093180291	0.781016565790299	1.82593322204962	0.180960479153076	1.40530933550223	3.41773562430687	2.46759898352068	1.78855046836744	3.09671847012056	0.222460563164675	2.86715916849608	1.6300793789028	0.591391147697133	0.165137762037834	2.35944922348452	3.52840327084305	0.900506907140803
2008020	14	1.77472782362964	0.00249501912290336	0.328045148513672	0.533475580152047	3.18148283379655	0.18264845290126	1.11509804036309	3.73853604689664	2.09536599637886	1.52806633574111	2.02331128171095	0.382233822968978	2.76509745680433	0.940385275521562	0.488922173790289	0.0763387806348038	1.74357816697709	3.45037950313368	0.826049125588215
2008020	15	1.44830288772649	0.00865165242816456	0.293834623713132	0.357782782971511	2.90094582859134	0.128319072432507	0.979197773159251	3.18929526314039	2.07515672949351	1.33581275502011	2.05503107216889	0.870550134691414	2.57426048043572	0.652947917656617	0.411645734781733	0.0241735486496155	1.13424660186176	3.43675091174714	0.81552661378587
2008020	16	1.07029572914039	0.107125748152467	0.237728446370533	0.243076111774036	2.11692148769705	0.119497912826742	0.857275123565102	2.51939682007539	1.95110666053324	1.11259836690974	1.85589758002192	1.33776340003891	2.49966077351293	0.609827870639108	0.377121724702145	0.0487574184978482	0.673916778566055	3.70802126780705	0.811157014623152
2008020	17	1.02159986600804	0.285437279935022	0.234016682407514	0.149818509884881	1.20860473583311	0.168469464340529	0.687298690680426	2.08675390692222	1.86645928597344	0.901473764276633	1.62255361788399	1.10040329893903	2.89000988941072	0.563181451913699	0.367419204633391	0.0815503850148604	0.617377327476351	3.01180082736553	0.749432241145151
2008020	18	1.08019296028892	0.31596632326911	0.258702278349564	0.106910495115031	0.64080373305314	0.180675483519814	0.547916310262517	1.7173641015422	1.80699736611244	1.41625057480285	1.59727754264226	1.44607661128568	2.08738726184786	0.550024598624399	0.357090755961089	0.0500636466267003	0.693972727063396	2.84776135712471	0.735914781837705
2008020	19	1.17008889451803	0.250989626210895	0.272139504563389	0.0598714878976768	0.509382391124724	0.129658414358421	0.462640130701015	1.3919307909688	1.76608339284177	2.04476506259867	1.67536839242563	1.21860680710515	0.562327425117974	0.543012097195985	0.595864526565939	0.0374726937675765	0.957665906694809	2.53410029161294	0.858746319691117
2008020	20	1.12225762840732	0.148506233871496	0.256525619394021	0.0298595184234777	0.521330146313778	0.0786360630425952	0.505023139917898	1.13981372418547	1.72258154288664	2.38617719227841	1.94697356952021	0.963774741195178	0.348565643182191	0.464489793673076	1.1794030901181	0.0350586017554623	1.64152374324875	2.21047240859612	1.08830872258883
2008020	21	0.918395873580775	0.11117314062067	0.230770019748199	0.013735685966422	0.561218139040549	0.0430652196358252	0.634347050747608	0.872204512079236	1.82777428904913	2.91791684596839	2.36555760859225	1.10561228363383	0.535158132546875	0.379371452748292	1.20566389504697	0.0207452894135586	2.45038865074797	2.55639551585411	1.27058264992783
2008020	22	1.93703330137708	0.112583232458418	0.134933016844158	0.00884284329341092	0.600007315206785	0.0188600155130413	0.734152552148194	0.732778107512248	2.33960432744212	3.77115529846398	2.37834326324452	1.26249629797858	2.17739221152524	0.339144050576731	0.838573369730031	0.022374089647213	3.45255541640287	3.34514609323588	0.440426651273613
2008020	23	2.40460648733507	0.10989184872494	0.212473565968082	0.0110770425240026	0.614376153082181	0.009609414664187	0.83208387529524	0.713311457660288	3.04436794219309	4.70989470926395	2.15446574098237	1.26126968600265	2.81101564137602	0.327898151571715	0.419759623931591	0.0315457117279225	3.69428166320421	5.55373160284576	0.208005180787742
2008021	0	2.89434533009312	0.0916510581640967	0.310411476691008	0.0213513447061728	0.544021542398866	0.00629457979081016	1.07099351350899	0.690950834345875	4.06932094656531	5.38140501171285	1.97702657703951	1.49456930559773	3.18874387516355	0.327774570405203	0.227547191227841	0.037453563207322	2.93687950156138	5.20563057716299	0.670378055536599
2008021	1	3.39764376257924	0.00428123889673113	0.314333844492183	0.0305232530071691	0.458851937096971	0.0196367203114949	1.42170834220965	0.821258619226783	5.08029939789199	5.36106620299114	2.03538977321536	1.81995815407585	4.1790358386778	0.329317568566118	0.168354919067333	0.0381052390141453	2.33113101660541	3.31886813654297	0.574183208855414
2008021	2	3.97588047063211	0.000926137930152049	0.305629059039637	0.036129831009354	0.472466058476903	0.134530635505028	1.82286895979673	1.26223929079797	5.5183559855038	2.09789105803405	2.34029474178748	2.07472115217611	4.72356489167904	0.329804267705242	0.141963712082434	0.0515678664893579	1.81493415700159	3.15371165812673	0.513918544497418
2008021	3	4.54811501462793	0.000917614311286996	0.280582908152125	0.0392287206427402	0.578115699540273	0.0771757247484537	1.43822832219628	1.74351672642257	3.71003520553921	3.53244634367819	2.38148111392151	1.58322753573931	2.6128823885254	0.330465214651469	0.11645467350874	0.0755607373975699	1.1170703597111	6.27410682036415	0.737778052985637
2008021	4	4.88419230380867	0.000972514293794469	0.282551956838302	0.0299317418071504	0.678746677318726	0.0692816260273591	1.10481567790736	2.42751175079729	3.57419929217179	5.71866020654773	2.21431052221902	1.54144883219085	4.01862684610555	0.330531928941082	0.0587125878368343	0.122479548982408	0.894717201226768	7.08179926894945	0.938706554707319
2008021	5	5.04937745172966	0.000928195941989812	0.278172006163632	0.0242724706616704	1.06815121040238	0.0436427844536535	3.47135838838088	3.05582516184183	5.68242787268334	6.23237422253712	1.66085398724284	1.47529435617774	5.53153823564119	0.322810926558808	0.0541467509609142	0.131446947084167	0.764437543232661	7.91128835106535	1.15253865234484
2008021	6	5.26845015941749	0.00140882518918919	0.313032391771596	0.0188708653137967	1.65393341138707	0.0175908212323939	5.37810574968838	3.58678816438112	5.55734671742311	6.34698847079137	1.30641444142995	1.00694054328007	3.22707504110799	0.318395377194434	0.0712453691068159	0.0983824997894589	0.637947518406946	8.61380900871663	1.21108815680801
2008021	7	5.17219675197837	0.00854335146758519	0.334523298272252	0.0160564193354752	2.28017644114548	0.0325148104781498	5.26739831279199	4.00991674101574	6.49286382851312	7.27395592805571	1.38578278883794	0.784224022017806	1.33118967395813	0.336212938090167	0.0614113704159864	0.108707639875038	0.728922123312026	8.18016904206084	1.42237904401682
2008021	8	5.2581256642434	0.0360595490559291	0.341771967889026	0.0211813663221644	2.75685506160609	0.0509858906316689	5.46475434057703	4.01761338682828	7.56958179561249	7.77413776616704	1.94200278610671	0.932621348697978	1.05938623735802	0.396539657475636	0.0295278385268544	0.0850227755024763	0.823637595153267	8.57285050505904	1.16789981013031
2008021	9	5.31414251434644	0.0559228048032581	0.351810639730269	0.212432162190858	3.06345000605087	0.277119760816454	5.96433928315441	4.03164102385137	7.84852640584949	8.83654011821767	1.68684900840873	1.15426604508243	0.82300889804031	0.502434686157607	0.0189319364922068	0.0508558439689817	0.995947621230624	11.1680137519565	1.18404796176919
2008021	10	4.99991844463294	0.0129528514360236	0.319640106136391	0.281368939627762	2.99231144381809	0.313586398484988	6.96072480113763	3.94758562865582	7.76695182317297	10.4003024721076	1.69843672420263	1.2863366095719	0.60628434556141	0.58043649986703	0.0218062883291349	0.10321443426411	1.52810188227055	9.84151869361352	1.98779833775701
2008021	11	4.74613259043783	0.00271761356053488	0.332344645468379	0.276346030738531	2.87379928259313	0.471745487448552	8.59318208013242	3.71025303136108	9.71744869812239	10.6919069859156	2.03712495870614	1.32771909408939	0.40526274765679	0.74338988232874	0.0217965373747274	0.249970879857872	2.21805432528243	5.11410028472905	2.123352061459
2008021	12	4.54335966997239	0.00107078149457231	0.296061685040671	0.227184962725554	2.68149161903572	0.403306248694316	8.63641947547373	3.45151056466354	9.10438766739113	10.1525380107121	2.73059260773421	1.30426527409343	0.287240281216362	0.95726198549939	0.0186518026206669	0.264772521167542	2.14126540060431	3.71230019771188	2.01849118547305
2008021	13	4.29188623453728	0.000662249892612725	0.255910339860776	0.258192141062456	2.75524344254816	0.197506712147718	7.96369259816244	3.33246893844994	6.3645430116852	9.55025504702076	3.1438492508163	1.1827682969613	0.201200442378081	1.0751605436164	0.0131007292435123	0.264005315769038	2.16679373143341	3.4208088267421	1.30270267314467
2008021	14	3.74377002739022	0.000549464682939196	0.244932113383222	0.196777872039622	2.8647199154198	0.151240041017122	7.36990401761835	3.15505769325311	4.80200389075243	8.84173108884722	3.32544028684096	0.800543870562235	0.18980858411726	0.690358377907341	0.00827314294635572	0.24371255835013	2.55202861357618	3.39776408666128	1.35129309907339
2008021	15	3.64672276144157	0.00208370964190483	0.147304939589983	0.16028282959787	2.76012777727134	0.128359175564411	6.36426466588093	2.94870436213141	3.74702701760675	7.45805842303675	3.04427995515232	0.616171036079375	0.210592077509403	0.704319957587485	0.00434491177375308	0.1574659055286	2.51561964860154	3.44072778076176	2.46466558416046
2008021	16	3.49471930396333	0.00889393291889278	0.116241151750106	0.075433273124826	2.23289872454257	0.0989381215131001	4.96127813143607	2.75495789246526	2.8342027703911	5.84023151141139	2.34760695496323	1.46031829817741	0.340715596724753	0.651393462224025	0.00197242165823272	0.0766743112359095	2.44436914874792	3.16316130034439	2.72690383212792
2008021	17	2.74493837842945	0.0476660105568295	0.096811330116035	0.0760274463404864	2.02811922299038	0.0676568601675124	3.85933842407724	2.99172066931172	2.465454145349	4.94655582200838	1.85232014567876	1.56136509252556	0.520108869808838	0.58067772281179	0.00112933822140451	0.0586540583693893	2.21763696626965	3.01775608280354	1.52905159101595
2008021	18	2.48363062826043	0.123601158983255	0.0822385153438354	0.0282274045384568	2.03464200822151	0.0412237284012533	2.80307519610468	2.70737567869906	2.46163759736074	4.29024278079143	1.53141602476667	1.53623606149764	0.603052424470405	0.561984404459193	0.00084823189637742	0.0389107192433742	2.45973992050744	2.86141912763328	0.830257279155008
2008021	19	3.11444120307772	0.104980842461171	0.0800326485131857	0.00670467893308014	1.78988354404678	0.105640023160546	2.22134944397742	2.36336318746421	2.522440794465	3.62076123246296	1.40756773755609	1.42306745441837	0.586980885052357	0.549043111718582	0.000740488594813318	0.0389888145215212	3.08511130174311	2.19500609849012	0.247889354668985
2008021	20	3.72124566480193	0.146847044946073	0.0780587720956698	0.00203971066681984	1.43529149794755	0.0986173823009669	2.00126853979772	2.7300687909134	2.781368787747	3.59613731387737	1.37979913263192	1.44035129491841	0.548199716807714	0.576382583734565	0.000680608886100822	0.0471887308768431	3.32140172914482	1.80362325736608	0.159611043064154
2008021	21	4.20371897201786	0.0739950087402985	0.0707383614052329	0.00476792781211442	1.36295411423572	0.0741010343262709	1.88218067516445	3.21282274089415	2.85381490786491	3.70495118179472	1.55838659887159	1.50753931918762	0.530769546982639	0.610424832512059	0.000634086431909137	0.0566021782771668	2.41250699559723	1.64634650802907	0.299568778661069
2008021	22	5.24342309200892	0.0342872400984947	0.0651508736345527	0.0371676678998221	1.6972504361508	0.0574911010573799	1.87040545408772	3.26313045908008	2.623205970473	3.53273469217892	1.90392932863492	1.518526162517	0.614239887482119	0.669690637332607	0.000764540441728041	0.0555131370512251	2.06765350671813	1.47234389473567	0.794024564230457
2008021	23	5.63739296838299	0.0267263579274137	0.0684003605996327	0.1826983522445	2.18730319297084	0.0277011935404238	2.06844093353071	3.86980122261066	2.16905843058776	2.88684918084759	2.00902836458847	1.32647155861721	0.615601475621364	0.544412163325497	0.000583028144478107	0.0249911100333196	2.65715253871992	1.28152157832174	0.925274924439362
2008022	0	5.82304784668	0.0349297771044776	0.116905969806851	0.550284046158491	2.25308450256921	0.0087806546770609	1.65999198866962	2.83429344815314	1.76447687135221	2.35786896399649	1.90814253877012	0.942172147502725	0.625507466344025	0.478694602203876	0.000392740722065089	0.0157580853222463	2.81841534117155	1.2811615939302	1.51554130504729
2008022	1	6.20889525802127	0.0402775045884858	0.0745191642711481	0.968827771980189	2.79938025818989	0.00644335315037747	1.36732856760695	2.648658741922	1.58661975937704	1.8999027669407	1.15224651652749	0.587741096425726	0.703425586078373	0.448162886033249	0.000333530324858353	0.0108471837011131	2.50403141547578	1.6311640500331	1.84242158120811
2008022	2	5.99729962257933	0.171550059505706	0.0409754624531687	1.34123299962277	3.16611221262499	0.0083313565831057	1.10726220521681	2.95116046973794	1.52530145999265	1.2863125143211	0.702019686545407	0.417912360420718	0.544169233866225	0.419320288929346	0.000314842895002937	0.00788018002985635	1.83030854692675	1.52687104828353	1.632371087982
2008022	3	4.68705121866918	1.12883577719967	0.396189520434426	1.78566146778584	2.72978594216145	0.0164728360296534	0.712058657583497	2.66805089803444	2.09471942836853	0.825359362337174	0.666600514213369	0.364126265481777	0.566178925465284	0.392425427091346	0.000375045080734053	0.00507343315886467	1.48323952435523	1.45042913775921	2.72984375178347
2008022	4	1.91595938733071	2.38986629061428	1.12442007610337	1.9857983384355	2.40530215243722	0.00962711950308496	0.626339249015025	2.26458774927186	2.76562850834948	0.61745431251031	0.701375553502648	0.356707038998907	0.800203923036866	0.370201097039467	0.00318461168360282	0.00256314534962814	1.55801157782578	1.1707492607703	3.63428132312788
2008022	5	1.31835952308148	2.38322105318545	0.54117912897432	1.17547106544187	2.05246411420202	0.00454986802335024	0.679267443188692	2.04128958105247	3.23826332146122	0.50046429611064	0.659590739916747	0.365437064577911	0.742777769755202	0.340622101794253	0.00748217374181831	0.0238627436147872	1.95689285279898	1.03119693540325	3.96555414274411
2008022	6	1.92200542576951	2.17852996949363	0.195265891755772	0.776466474370662	1.95466659806207	0.0838628337038972	0.766517885341648	1.84255892378955	2.97142113041453	0.468723182282679	0.557114074348554	0.403719137955607	1.12425101651148	0.296179192776413	0.00425318888399404	0.0208365011824537	2.71228942087324	1.02439227088314	3.76647996827898
2008022	7	2.6463130808391	1.8092662021364	0.0194852525588404	0.948521052597088	1.7021366213013	1.5125556895198	0.764389071317066	1.57836768860054	1.9919489385852	0.500217369887554	0.516791562260844	0.389101815282213	1.44552433334874	0.252438214725011	0.000695932909453	0.00843119306045175	2.45837869275592	1.1590642701479	3.53920917086095
2008022	8	2.68961987090321	1.62319327676182	0.0156583297842159	1.14609224226231	1.87249652581397	1.65697543351635	0.843830626808354	1.41240540381238	2.05143045646051	0.573456461031489	0.515062761678277	0.362106170139048	1.41633113451159	0.208763723320555	0.0004470684589988	0.000875166947337283	2.26359694472744	1.59245606793344	3.66464935371994
2008022	9	2.0827309859454	2.08113350203279	0.0579666584496589	1.09182748381255	2.63386479853795	1.69682661150816	1.04216088225131	1.54054126242318	2.04339583160811	0.772107514617508	0.684030440064031	0.351936776851929	1.12543788844982	0.192858464766566	0.0323311607515191	0.00908549453012123	2.29496444163139	2.18574478173212	4.86462252792135
2008022	10	1.6553780802662	2.13399896518041	0.0856572847808122	0.877807775957219	2.73086352396564	1.63657499091698	1.13693983119195	2.03950671323758	2.1713575174455	1.03726478014529	1.04543603921089	0.342481006984923	0.822754714077572	0.182215288986269	0.290046197663731	1.09232667399429	2.11897594612841	2.40617311294204	6.12891461842874
2008022	11	1.46350694238992	1.80180636306403	0.112392765696049	0.883287424568958	2.54887201030317	1.40237875128835	1.08871914809679	2.23851941740746	2.24675257940523	1.31761652268663	1.14338420340985	0.334979215724607	0.526337003661908	0.187594950628912	0.65697249234309	1.47893810266738	1.64863076152585	2.72896418144707	6.29919333984408
2008022	12	1.39513993315115	1.50041622305647	0.220446011277453	1.12568901774551	2.12742019687288	0.992753984995928	1.08932315731055	1.97008856849791	2.23275712172262	1.52645727997286	1.22232346319804	0.375103069074728	0.560876528563169	0.210378864079547	1.1135690935044	1.44738077165436	1.37296027108302	3.06246147774486	6.03820514294373
2008022	13	1.35403569865812	1.32987804251026	0.322035472602533	1.2809105685576	1.72670008760744	0.870455555139336	1.29982109152991	1.5672049897219	2.22152299177353	1.36687359351778	1.26287769100951	0.386086615167605	0.398715258400745	0.199880502221243	0.852383630077506	0.910754535602768	1.38364807728324	3.12493871400191	5.80473058847963
2008022	14	1.27828575815268	1.32260764598612	0.394124450795835	1.02874788344355	1.55752585024132	0.859933900694436	1.25734718560807	1.42591739775954	1.86149313519957	1.28898832872586	0.992216403486804	0.360983901859043	0.30041438830703	0.197760430441493	0.619898774654366	0.773373389396844	1.46716939780597	3.03866063313821	4.97308312888268
2008022	15	1.23619841878312	1.26825304727857	0.426891925513567	0.924154789479122	1.45644907680605	0.770082617431694	1.17096770984791	1.52154840847439	1.62222191293044	1.22009359828373	0.733801350785131	0.366243814377358	0.257532679684767	0.197964412012765	0.703206679641332	0.813295518806353	1.56014775114623	2.86664830423918	4.37385838082733
2008022	16	1.32996751646864	0.929310090260562	0.411396995708996	0.801387671457799	1.34200562605269	0.611958610903954	1.07482165762196	2.02885491959471	1.52039531285411	1.62799623392523	0.555245137129976	0.368409395606394	0.262097615151812	0.201089564596024	1.09938970098171	0.90085305335419	1.49871981852917	2.48529543131059	3.59194524437587
2008022	17	1.43173617631556	0.714197005829935	0.37682336840826	0.753864018406098	1.17520519923428	0.547769154433226	1.0046181048474	2.34522014022166	1.45088729714262	1.91778083716172	0.484487665441069	0.362767641128693	0.267913845898058	0.204081254350512	1.05444940210653	1.10223030981394	1.4071190407406	1.77410621150841	2.90694558726218
2008022	18	1.90525625514277	0.593844451005813	0.344689633167128	0.81092463507181	1.11430729160448	0.521815579780972	0.923754365020259	2.1290325157026	1.34997373354777	1.62951341040733	0.464081711389508	0.359037238317085	0.292112930143685	0.209125542415637	1.02658883979813	1.19963164958127	1.33293792032469	1.22557529418333	1.43525755375127
2008022	19	2.28874156503685	0.494375690341043	0.309254796114449	0.778655729467622	1.36645526968914	0.514963013021145	0.869388609476754	2.0433091416893	1.3760938333428	1.32323212597498	0.406976757553754	0.355881080266029	0.337338567254007	0.216314946819596	0.983734707922184	1.03489219305722	1.25998059183738	0.896300044547322	1.14877603811317
2008022	20	2.34107060020088	0.447148594357891	0.27835260788733	0.808260599346864	1.62141778265076	0.573678560944826	0.780229867429562	2.02036971896589	1.35455999205795	1.06550979785541	0.408425789953583	0.366187946574513	0.302986686750563	0.220363866616212	1.00321535420066	0.75422541166375	1.24383222572861	0.846744226333313	1.00588783738855
2008022	21	2.23589825148174	0.424251206620821	0.267044330330411	0.809635940966629	1.73027916549931	0.531318752334813	0.659829389505867	1.81034503873237	1.33982896783766	1.04633226640517	0.456650063723497	0.481915888808924	0.439938402743304	0.223998718326864	1.05772834550708	0.643847031770205	1.15016387162992	0.859337285693664	0.940959581219875
2008022	22	2.13876343527374	0.404329890960647	0.256207298467949	0.735178580770945	1.50488388525319	0.566691290398038	0.589178316021869	1.64749592943061	1.33709829909178	1.12843882016503	0.450716783356133	0.523724869413774	0.446523599018175	0.230388664836818	1.0979643360138	0.582885366808873	1.11549250684875	0.864210400567333	0.940598543158579
2008022	23	2.0658700322135	0.390606224430062	0.249539862551049	0.627649713048865	1.3532768281362	0.580998335041638	0.555988348045643	1.9691552314214	1.28301037714	1.22134674946283	0.460405757717088	0.49765184258909	0.460029214328696	0.229129392735938	1.14242112099743	0.487034785599052	1.13812526408216	0.883231396590594	0.888938670910591
2008023	0	1.95512339780631	0.388581076616089	0.244160930013927	0.778880759011585	1.27261199768905	0.559996085866231	0.526115500697123	2.13076602826279	1.23302349585914	1.46557417089022	0.498141884209261	0.499066869923078	0.456256568515517	0.23022793453545	1.06875564780297	0.46791909581297	1.08889381440106	0.908164020022956	0.802715325762188
2008023	1	1.84759000411743	0.420303527476851	0.239253151824691	0.898435514353053	1.24199917494956	0.485193169485125	0.498559880925087	2.14680910068955	1.1839791601726	1.67821171876455	0.463526385327116	0.438214641246143	0.543234193380522	0.246660517324428	0.75939088274883	0.446904976213568	1.11529696812749	0.925621098657831	0.52792730704632
2008023	2	2.16212708182524	0.49928853080457	0.23311113715018	0.951219911275825	1.33858963047346	0.414130071943935	0.495074326525398	2.10487934779071	1.1599505602725	1.72237270411795	0.429069416678151	0.417874609982325	0.823243516576343	0.266886510027784	0.69754483834605	0.346385315944538	1.03678252412767	0.94664606537126	0.388902961578088
2008023	3	2.58331321136206	0.782704367272735	0.226413572179457	0.988009807978147	1.44490899067054	0.366899821233371	0.576413604765948	2.07113828091433	1.17712967019691	1.69700945825367	0.403922769808115	0.409949771161823	0.820461905371258	0.290648016831689	0.704943749905538	0.337802427731261	0.97145880263704	0.981805555352279	0.248886799367118
2008023	4	2.59281377642534	0.679729512795898	0.220051111668632	0.827205032320775	1.50898450436315	0.366519296558222	0.782311823785931	2.03657988453669	1.20676324677173	1.44465790191992	0.396736350761108	0.416736476726547	0.831575291764968	0.312897683447759	0.599831509412812	0.343621185012534	1.14394818737804	1.027559080274	0.18307466451596
2008023	5	2.55106043143469	0.582446541401654	0.212179606586349	0.689876223075889	1.53359678864915	0.431191290080698	1.056706473405	1.99560706735968	1.2200104562141	1.69881801914325	0.446923036147082	0.422094037529795	0.867773228133004	0.361476098595887	0.490235798485795	0.352778419174595	1.24025015876171	1.06247159848033	0.213304915659025
2008023	6	2.85876258338344	0.590435288618183	0.202656665475324	0.529165162669979	1.5750768695398	0.521852791903976	1.36020901341909	1.79691316093636	1.34674073973892	2.03606510283113	0.465173814152708	0.413573006279863	1.04284863477755	0.415275451288767	0.455333536243792	0.391980514266118	1.2648591841392	1.10199983057674	0.247631879681498
2008023	7	3.4528705177553	0.509718242505197	0.203165219220109	0.416934517935781	1.615438371277	0.769907108261892	1.22613101529626	1.60418894122934	1.34835017646738	1.87748551298422	0.445576900913921	0.403913497046329	1.34850662141589	0.4084233445606	0.44763918676625	0.653604213263499	1.19197672802484	1.21698506288657	0.290557773653089
2008023	8	3.67305488109105	0.513184887488745	0.197534123556358	0.383351768429027	1.55193902945304	0.71973909429512	1.03720559891896	1.76407090764724	1.36580511886437	2.13464904272211	0.449685079047048	0.364276952879101	1.18249817675225	0.364667581498883	0.472550841557017	0.902446537108986	1.10775865263255	1.28257830083345	0.316710807518153
2008023	9	3.41416867477375	0.598342919748217	0.232556680120559	0.532267958971297	1.30511528331697	0.63086863912635	0.707434842712594	2.02209682937234	1.701586679014	1.76430635860007	0.518828788885694	0.319174950107363	1.02679775441526	0.311425734983935	0.50211377503353	0.825769858780973	1.08646538297675	1.40688831530467	0.281353493552062
2008023	10	3.86052693852373	0.667527762641371	0.250113138595637	0.638759957176842	1.06842571421356	0.564428063487851	0.647739955474636	1.96833011158296	1.73974270799286	0.996205774114729	0.555693537637323	0.274577791721622	0.843367820893998	0.278787434441727	0.546435861396605	0.871639178781825	1.06489516648056	1.52097503875046	0.189000056326237
2008023	11	3.91625921747384	0.61588650913478	0.275483010161392	0.534752799736388	0.959833193714532	0.502279206607126	0.609325469158911	1.55757223503367	2.14401447127795	1.56593588742908	0.581963472661456	0.265681627396913	0.629810481331463	0.301528074385997	0.538027688904795	0.899359433400051	0.987004617875876	1.92069998570353	0.168299167467858
2008023	12	3.19153614565969	0.528178573565984	0.311394490007545	0.52254880723021	1.04626668270381	0.746392140580861	0.485193832793053	1.18183249645389	2.17103619939235	1.88296393372039	0.60313539430598	0.223315157740394	0.756464262960947	0.360694626322944	0.550841707356657	0.713628804470068	0.878259752162648	2.39964487274825	0.306906982992873
2008023	13	3.27585930011037	0.391900932097368	0.296009185150244	0.743932276269651	1.28713214786885	0.752375234018098	0.383406790827127	0.704057511350461	1.62697792859719	1.50796887796464	0.629385833883778	0.236670364449913	0.670211412996515	0.38875181276739	0.606180040203833	0.627502498451801	0.80457548419186	2.29958456558247	0.38158699004273
2008023	14	3.00661041076177	0.274782431088212	0.301168790506175	0.654188550733978	1.18163036502529	0.715734937993777	0.34772581357024	0.448107112265488	1.38893198592247	1.38577567514648	0.641493171421397	0.202944477526245	0.539014427831446	0.393302993919083	0.655340174260789	0.599464421337747	0.789164313794279	1.98355409296376	0.581735438890076
2008023	15	2.45375134007166	0.210156762947231	0.288400423909484	0.553648690491939	0.95730434792793	0.619607708031073	0.316785683178741	0.376642257698192	1.6648719647635	1.4394421266487	0.657650617952353	0.179299582466268	0.476237981718054	0.374703709279721	0.552282161828662	0.588948901968613	0.847572354645318	2.39749818706168	0.771645664155496
2008023	16	2.2220395614116	0.203410301143497	0.279385509145535	0.465745080796175	0.21069038997233	0.398787226368499	0.292818675200732	0.241601904610798	1.90710906725819	1.56494291125716	0.660719771799519	0.165791102971668	0.454279733527782	0.35710700969896	0.432926539411592	0.5345563983308	0.827233373485757	3.02656973627903	0.697440987053768
2008023	17	2.6533168724635	0.17252647279027	0.246255907537356	0.393587404157412	0.0686499793198628	0.313936389885707	0.268554823402758	0.309727472546094	2.08135743190689	1.60248012328201	0.646944991161837	0.155251938353204	0.424033924575479	0.349531543310651	0.388416816030216	0.419789000045916	0.785678632070544	2.86630900894656	0.56922592898227
2008023	18	4.23480615939417	0.0808760724189154	0.222847596736804	0.301725073457214	0.0458424399206074	0.288531188788489	0.257145522460435	0.35658862769001	1.61751663642305	1.5638815739263	0.647165701533435	0.14402189464661	0.421222796388014	0.349324440622602	0.377675614192156	0.297801664310718	0.705841254893017	2.26734372866458	0.477902276809168
2008023	19	5.21338582235053	0.0302985211214084	0.20666799335466	0.242806243927558	0.0548824529446385	0.284975501457702	0.26652039986806	0.351113838501522	1.38380727194541	1.54265209715319	0.655070961507699	0.140473768942444	0.746064442616242	0.354691650037273	0.437999461837558	0.274473441153327	0.493189866910808	1.83377647760652	0.421022057040718
2008023	20	6.27586550972003	0.156755136366992	0.209098393517685	0.196930842285182	0.154527290611147	0.270770238686577	0.292643890947714	1.00585628383838	1.36724811399641	1.59111153283082	0.72983584973412	0.142920198941212	1.44051639098304	0.358484586558745	0.476486817773566	0.289070562781283	0.371885825087341	1.74397884728966	0.404434543452839
2008023	21	9.01724656686314	0.41224005786356	0.19955111434264	0.141613711186375	0.136124814176135	0.131173125430645	0.309482852829912	1.88324051215293	1.55374094614576	1.36346623646328	0.78541374038594	0.144360376091656	1.72515723364231	0.36447517705027	0.349456124930131	0.303308615825576	0.77739022265712	1.84560445584118	0.437198894683203
2008023	22	10.22199565689	0.368793527741877	0.188488094526815	0.0563645620535046	0.193840015994856	0.037385482112524	0.33357551409698	2.44944340091067	1.54530114616802	1.07125536734105	0.807718178567278	0.200070275642498	0.752373212651204	0.367715338450651	0.329914634481875	0.283944925143634	1.11838855106332	2.16240896390213	0.528039605007717
2008023	23	13.0178298443441	0.327181290038638	0.191974198495363	0.0231726399619485	0.401121103557191	0.0622389099769245	0.438590139783762	2.84481121964737	1.53937631610986	2.18533656008033	0.791867870528813	0.212603283812134	0.192049553779905	0.373837466446442	0.303261529222747	0.240523183333854	1.00163922825166	2.6200497106536	0.677352525315688
2008024	0	16.5917306280053	0.306025732268228	0.205085023264585	0.0715591225237932	0.783003988295574	0.124045312921286	0.994712025017947	2.73411396981779	1.06079092090121	3.61447225824952	0.899216272572363	0.225707251523644	0.0875918769494231	0.449387968006993	0.302581089202338	0.221519452362784	0.394678117445718	1.68536209540288	0.652678080341441
2008024	1	18.2337023891713	0.292603014202024	0.233932120012691	0.17421522036732	1.02310506935119	0.19967161192235	1.37387763653096	3.04404585103758	4.10339104280758	5.75805565287432	1.23986174298574	0.248979819058785	0.127780447976476	0.546065884792727	0.310352915886369	0.188395689375711	0.21248014464784	1.10826084823408	0.656334287079273
2008024	2	23.4151528661229	0.296287358093972	0.258080968013842	0.254229766640454	0.62576224942081	0.229661814304358	1.66689772724546	3.25111948288854	7.39682208715287	8.25059248752357	1.53654633984346	0.466013584148176	0.304953532292518	0.507711327092714	0.291042045213427	0.0976323528950353	0.14512378550028	2.44960659314809	0.926769702632568
2008024	3	26.8902456164016	0.323587498926668	0.315142809513808	0.279186282885058	0.741484740288056	0.219509692498747	2.45630050445402	3.64919485076789	11.6914157216626	9.70429726189246	1.57970801138396	0.757858076930225	0.942150895088561	0.41575879597417	0.258204725947362	0.0340573888070744	0.131222405318583	8.38553664783625	1.37861897502849
2008024	4	26.1495348004639	0.375978648146613	0.334061366004283	0.282160002332664	0.851792620567417	0.225443306599573	3.48249477717475	4.30265420445085	10.9274844788223	10.986506913576	1.64410716989901	0.899136979966497	1.84621257181062	0.36338927776718	0.22916258499642	0.0158037890411958	0.116132130364544	9.12471840642457	1.72158675251458
2008024	5	24.7071776414445	0.353320399558582	0.34150285604722	0.278723463727942	0.777518520913039	0.267750188286743	4.51967467527137	5.15958764348164	9.32987115550692	10.2352066746403	1.85543954411466	0.931462259246288	1.40872370967289	0.334125021051661	0.210586084346567	0.0269269717850267	0.107766649879109	8.80767529049225	2.10001703876326
2008024	6	20.7403974216011	0.267177284773845	0.343733098557822	0.280821618700272	1.81358045709328	0.303496164507752	4.94327175455551	5.931415521365	9.26550697723549	4.28894509425246	2.30114569831618	0.939776671720489	0.663761880288039	0.42930513748653	0.204763426710529	0.0548130252439865	0.268474013425328	8.96708665866137	1.90917645183145
2008024	7	12.953615595501	0.24140018747023	0.323586420993369	0.285989141191253	2.22196242518235	0.33670259234537	2.65540396688848	6.41233003791438	9.07988907913683	6.00808359573543	2.92959668663053	1.33800023464011	0.429530749409104	0.473637981188689	0.23815392491209	0.0853164433079801	0.551262086755759	9.25708904469033	1.63664158128086
2008024	8	11.594345365316	0.298330069071305	0.292573969297894	0.263441404944454	2.4028585049102	0.282794395957387	4.1268735292877	6.83632258208571	8.61963115687664	7.7267407362028	3.43215737417031	1.88995403546057	0.401384783730719	0.470248657264021	0.251589789094336	0.111671754623374	0.590775795328893	9.3099511229066	0.714184362593054
2008024	9	9.65985731440366	0.388930261572529	0.249869366124357	0.219224459770504	2.4674471882834	0.281151500824175	5.95725474160166	6.24359751089041	7.73911697964259	8.49463280469805	4.35088124350066	2.03269188701995	0.259226918255127	0.455672690334734	0.233698128020081	0.121517681491382	0.56908917835866	7.42801089775446	1.79067268695146
2008024	10	10.2550181459371	0.510766925332688	0.384858419485796	0.193066950397974	2.60647738562032	0.252743978584965	6.21578378886466	5.47982753895205	7.52369434211608	9.729788209745	4.59686090214739	1.49680040078746	0.521246710605026	0.430025437479198	0.206359839691572	0.128180533437928	1.16808096708529	5.03034408898664	3.05203244561377
2008024	11	11.14655476204	0.54941286352715	0.453617521827785	0.21181610633908	3.33559927134176	0.283425189026562	7.30982513776487	5.51007395563905	6.58170016939983	12.2233477289802	3.56567831798475	0.876352809000055	0.885637459510913	0.392614863946734	0.166290336619805	0.129683050890337	1.44584437877017	6.35698375917689	2.9862640562829
2008024	12	10.1996612867521	0.321426438553375	0.431587860909539	0.26586559605989	4.6427431375999	0.277993700876039	9.33440692754557	7.22396650231286	7.63448383764677	12.7039104924398	2.27986085813297	0.874070506402416	0.878054861089643	0.78854989525061	0.0896832202041621	0.122391845309246	1.60235913349887	10.4150475613175	3.08810070562079
2008024	13	8.71229684440052	0.395329174090421	0.550862478827325	0.281941651351386	4.67370524594746	0.264421697464728	9.99276096677498	7.2474672368001	9.81855031722373	11.8096252980571	5.02157310361478	0.942922436959624	1.54360090871983	0.729841586292409	0.0440206181363532	0.119311684161678	1.96921500076348	11.5176186884329	2.76573944555257
2008024	14	9.66419851421526	1.30687971935782	0.575796079296828	0.474081753095127	6.26078781542353	0.265190710968598	9.16810810747598	7.64712580698943	10.642909734005	10.9907492545296	6.4635788633502	1.03626272356292	2.71155218127938	0.457364548017288	0.0469279088410379	0.116964449910843	2.53387553866684	9.19538289812206	2.29073135165038
2008024	15	11.069623392766	2.48971242754428	0.581153576359184	1.52995551638566	5.97651730149883	0.259028196706499	8.90110407132439	6.84562153954817	7.17700324574784	10.8293423411262	6.06179612323477	0.997464238488962	3.01691825717906	0.344050754505804	0.0480990764515753	0.114436791527043	3.40409776346919	8.67083391099796	1.95050785167911
2008024	16	11.3315907111394	3.22765105388029	0.503210964389891	2.39467303919872	6.49543965506277	0.250812296492893	8.69004911559793	6.84753318659449	6.86472625855536	11.1714193647319	6.17036613638367	0.999412972393998	2.49420680484541	0.247717750996624	0.0578706237283361	0.111619462035935	5.25627563103722	8.95430196837663	1.83688351247875
2008024	17	10.4743208258989	2.91656278229125	0.443567502534485	3.16214304727624	5.96178918663964	0.110686383300432	9.3537046428114	7.94606533234726	7.74967006632823	10.7181000759232	3.38710465252517	1.03841210634281	2.57918279691334	0.25219199749453	0.0748851788167368	0.108971567973256	4.72349654953147	7.98477748356394	1.97281471303175
2008024	18	9.87003427912118	2.42030167613532	0.366663149257271	3.25333259065427	6.18954705357972	0.231003673066995	8.61361463340594	8.16027969706278	9.32186065131123	9.19978561273245	1.83710157950562	1.2154565373979	2.42578263459633	0.246410730227478	0.0949198949282394	0.101252062632956	4.44597088327827	8.30135105323656	2.15963775757792
2008024	19	10.2312626145532	2.41541826654349	0.243871151490318	2.66528088158391	6.84077973054629	0.845396439089196	7.97763614567356	7.41828058174273	9.73492558740631	10.2176251394046	1.27628662234122	1.59906055259909	5.25152155816336	0.198416236640884	0.111046229890252	0.0820241285865212	4.66927179382779	9.72022357333128	2.18569341710776
2008024	20	10.5734204230664	2.87202144882008	0.0640191529008984	2.56434299907881	6.62471335628971	1.2547061668963	8.88432177463222	7.89697818391188	8.72121675034982	10.2470283871095	0.896945546493383	1.81105113517422	4.98412654999015	0.134306608138499	0.118040452251661	0.0421939967167176	4.79169188123502	9.12777240255696	2.16878519842433
2008024	21	10.602298242317	3.28652230922966	0.0236981731802607	2.68767460596169	6.24136527112117	1.32324717059584	8.83758696507397	8.22752219080754	10.5028383415725	10.0842126190673	0.929729499997412	1.20281505452317	3.6882927833069	0.155311313342197	0.118686219665028	0.016844532430191	4.76002286065464	12.2719256919746	2.1318384472761
2008024	22	10.4187492858075	2.99692657887906	0.00957508658066851	2.87133298982239	7.11191378498223	1.13496126553881	8.57559982493991	8.31680051931191	10.42953676654	9.62401483429656	2.23118055768822	0.603701581941704	2.29979738415441	0.840272123197251	0.112394648903856	0.00602423955963963	5.24168740624907	11.6363228559362	2.09667976509386
2008024	23	10.9214460092327	2.96689754086091	0.00419164654599088	3.13137604347453	6.89050266277604	1.03654577822381	8.22141971343689	8.90747825230653	9.28693980634546	8.74862962183523	3.07862377420519	0.658630232379871	2.7290032504248	0.694501522613653	0.0515477699157499	0.00826863701941469	5.71048689088355	8.7297111945231	1.34716287157467
2008025	0	11.0179746677586	2.65190975584378	0.002946380745366	3.77123259619855	7.27410762377277	1.36923906581834	7.38653379511157	8.35375038547756	10.2350819072852	6.69527147034808	1.59648578474156	0.857895977687521	5.61187662681117	0.898231523941793	0.017228178174109	0.133684974440365	6.05127504429793	8.05002658849492	0.80605311763376
2008025	1	10.0210370763317	2.29770435795743	0.00357589693372832	4.2008669485032	7.14143419459127	1.40959320308062	5.58024920026452	8.5086576608427	10.137036018542	7.08582798464885	1.44143375525351	0.546050737929534	4.85135191317849	1.3277766024798	0.0334304758146935	0.37402708564259	6.14102221455086	10.5935918862716	0.733923065252905
2008025	2	9.43102415082713	1.8472587441717	0.0246507094111256	2.57474952044982	7.22592897646327	1.30589413092136	5.68178194800596	8.80969583851321	8.83480542261149	9.42876349567415	1.8604750225067	0.476516607263156	4.50897928867434	1.43882713013206	0.241920152512052	0.541002007381749	6.40697449292319	10.5963669789157	0.745852102702079
2008025	3	8.61645143146202	1.63341190136262	0.0818419787847989	3.0925660017752	7.76644796078084	1.23270610869564	7.38229938002468	7.94869051709242	7.16383702006188	8.64635750010524	1.28394284547978	0.532783649247111	4.84933774343287	1.81132395755951	0.490638952210136	0.649851209008697	6.54204288742595	8.89065722262763	0.787037317734431
2008025	4	8.32763802295514	1.26955423039761	0.112502353086765	3.81673100118491	7.3466904831495	0.772737833021504	6.74792428408329	7.03403909746996	7.29986918890962	8.09504125947128	1.29440594507203	0.840875289951821	5.86845175292908	2.46926984486336	0.570770507921254	0.74856348019769	6.98398235417522	7.81158701408346	0.815535921773368
2008025	5	10.2340850873343	1.18532261246684	0.127354788464283	3.57928958305706	5.91847244096488	0.555817058694266	6.51090102881044	6.86541455182596	8.18489419034467	10.9050506273361	1.19400967102463	1.16135072489607	6.41621858644596	1.44278600170047	0.822181257742404	0.775421113910246	6.89926183651266	8.77818314188802	0.79323406484791
2008025	6	13.0206696780992	0.987582168680564	0.10430340494649	2.1554522836348	5.03157401245791	0.540337102333713	8.79262007310588	6.35399859697552	7.42128583237914	15.2000589521374	1.12698996449333	0.805210483613424	3.51014365390327	1.33128451410846	1.31326595984542	0.852791860259059	6.96454877871453	7.91755661740152	0.722624229082143
2008025	7	16.033729792721	1.00072368358471	0.0996373755936629	1.36182772659354	4.81834914155282	0.797733426666169	10.19113414761	6.93764222958714	10.188731598017	19.2073382897459	1.37845159834349	0.865565759316732	2.89896293812244	1.51389428368927	1.04596300880386	1.15209413559268	6.97437711914337	15.4737302383459	0.599977014219932
2008025	8	19.1127659830919	1.09804311213074	0.0993702414166402	1.57842044198132	4.77720908110469	0.805068183218057	12.3440491981947	8.41385161675754	16.5605963084273	19.5536078492209	1.71053377924117	1.09401875371695	2.0822175591819	4.95842440325364	1.0894964803932	1.46117578481067	6.83733169455991	19.6102042513099	0.996887869053849
2008025	9	22.499544583452	1.22509868738163	0.103323892084133	1.46096520167007	3.45400508104904	0.866831008026329	14.8125004595432	10.6164171750867	19.4055081621742	19.4051389616519	1.81147923755818	1.04324841054559	2.81082694769333	4.27928963921851	1.25327171578564	1.40506792664109	5.19161308567113	18.9982265580525	2.56747491851901
2008025	10	24.6419176104114	1.4488477082922	0.138904369429964	1.21096483541013	4.42984778933307	0.766129929679297	15.8531160434737	12.282551058931	20.6106419582717	22.8165846145608	1.66205417162096	0.851994493570949	1.74758309320394	3.77155717780645	1.2190639821152	1.28956978076015	3.97345930716184	16.0452644876864	2.97471524005251
2008025	11	23.294048285848	1.65623930646626	0.353760177655301	1.18461519909556	6.9453604101439	0.623822190547569	17.4304039136401	14.6031452103072	19.7953381981741	22.0207627179618	3.12773625745821	0.784823482720023	0.770119198337285	4.78147744008409	1.21490882480208	1.0271787705992	3.58511607448776	17.3385053862575	3.13548399876564
2008025	12	17.0246520396613	1.73132154967459	0.468594517451496	1.56595282681819	9.60931856218262	0.641152716786822	16.9605915599162	14.0476862220457	23.103156444563	20.9495043263304	5.44504633200547	0.736209439058099	2.23712206561042	5.72478128659983	1.06577375874351	0.884538378975834	3.90100203161969	18.6297262820677	3.21845829868996
2008025	13	21.4360699199448	1.80736619048024	0.438123491059263	1.73578098486705	12.0367002146887	0.614155447951883	16.5279426398278	11.0094719837666	23.240352756752	19.7565777400168	4.27895040147381	0.649401439617505	7.41025511163265	9.76316460147346	1.53214438684322	0.695990707947118	5.39831681739511	19.2809289749089	3.24734505860265
2008025	14	22.5251357566814	1.84301379424161	0.382368796930337	1.55134147892508	10.7741793650365	0.611994156332597	14.2930227512512	9.90776381895565	23.3066604859377	17.5538835416506	4.14405934895375	0.653753635642898	8.09199539338872	6.89048771798601	2.05556422684405	0.710071824576629	8.40189795339919	20.8635080187613	2.9978532319052
2008025	15	21.117380479109	1.88659319194951	0.224094076935346	1.64368445980359	9.63950571284848	0.697028724841612	12.5967787696139	12.1379645923309	21.2838026999915	17.2291732420043	4.42767241836846	1.41427878725835	7.05125866133784	6.93191222193009	1.54086430742412	0.487236220986378	9.60723232007958	19.8009243838961	3.07767954045375
2008025	16	23.1208464411529	2.01229854785832	0.202686890906985	1.6602114610777	10.1743677776801	0.665678098662136	11.3390852398252	13.1639643110653	18.1647707887019	17.2384834677222	4.94447068522322	2.43124128290282	5.80937734660793	6.23590500460175	1.26173708713203	0.293262073079584	10.7215254704469	14.2764442716461	2.9116656835487
2008025	17	20.8582290541089	1.97383948794983	0.192365482520931	1.68572702987962	10.7419845531123	0.606484861132605	13.3989309047546	13.1639427325975	17.1693491086985	18.2790483458505	10.6798585849457	2.24088905726396	4.78631533918378	4.6495587025668	1.03920989548973	0.262325231147925	10.1317545707162	6.95083886924196	2.48614810599887
2008025	18	20.2334530069892	1.78587864918384	0.187101666598047	1.91897948656995	9.6222081947391	0.566270227974902	14.3663010471338	16.248416679879	18.5214424306873	18.1720459150015	9.56951912111903	1.82762830806073	4.20223821981047	3.51051756332023	0.763433198520075	0.250186824917446	9.476165233632	3.56595814962154	1.53490146223215
2008025	19	20.1694347452201	1.67876764422556	0.183888301592972	1.97938391269248	10.1744883321055	0.522597085687743	14.1024696438091	14.8823497450396	17.5964988660815	17.6392886163284	6.60820922717139	1.68012824378502	3.67954916121595	2.7495266273181	0.542821621956157	0.257517943992638	9.98272888328483	5.52992138853475	1.20163169240418
2008025	20	18.9194694755527	1.76038441227722	0.181828558136455	2.01205924224531	13.0930409629748	0.496429079550649	13.8643554838368	14.9811188984339	15.6834882931637	16.836944159123	4.33408974520476	1.66139989064411	3.36501253246155	2.32206975036395	0.384043120630935	0.268948124822297	8.89072991277097	4.47918065910225	1.18034523259069
2008025	21	17.8519542494499	2.06222448897251	0.180404910551173	2.83359845769206	12.7278911861233	0.50594807290885	13.2603119555666	14.9205108922762	16.3257192149801	16.3854437728629	3.72465376950763	1.85771116438916	2.97561652381313	2.17650961116057	0.443330179645655	0.286743680483947	8.46674180616112	1.5539174483325	0.941523650340567
2008025	22	17.0626537642448	2.19424089688504	0.179096021426017	3.41837100939208	12.9677202671826	0.626618575639074	13.2560561245041	13.7928610999827	18.0088167467632	16.4549994334976	3.74340496967388	1.93743552885913	2.47497571633102	2.1002513445423	0.543553258232362	0.387086046876174	12.2045916181077	0.407712105163005	0.947204711206099
2008025	23	17.6856667587116	2.21617775789975	0.178277473592632	3.20252703187483	12.2830803546146	0.869398558933948	13.0231470654133	13.2683398515488	19.3785585323457	15.0387960227505	3.11306840744	1.3174219929865	2.16691206079175	1.76537703104771	0.537711203226919	0.449180798753749	13.1012730265934	2.79379428062171	0.996873223272332
2008026	0	16.562949667771	2.1739548067383	0.176930801654517	3.07811067617872	11.441631591227	1.19297189248428	11.488219928681	12.8958140309244	17.3548658005694	13.1648710317483	2.64213513556684	0.808906202406288	1.78878274654738	1.3337869010498	0.595071703861249	0.457214703280192	12.5368065505495	4.02222161900911	1.11668756911711
2008026	1	15.7475413985236	2.03795367459416	0.175884280262181	3.19368277095469	10.622565375171	1.2693184591041	9.37307737315364	12.5994287942578	13.026754927401	12.8108910007008	2.57304748584642	0.949925246841617	1.4868205912161	0.939778977175579	0.791523826315203	0.486422611296864	12.3935529525775	4.74990431035093	1.29481130616847
2008026	2	15.4627416051263	2.13298825286396	0.175238582032792	2.96906291048735	10.2245129099932	1.15983841538562	8.77451416219131	11.7517154065442	9.05777689762149	13.2071477289158	2.60712141066137	1.00832133063469	0.913919051444055	0.431506967258914	0.547816570354758	0.574057181944236	12.3172659004171	4.66696848559673	1.42278223871643
2008026	3	15.9809385267858	2.38538537065181	0.174984436804572	2.62726652861766	9.83574468734132	1.04476798605951	8.59552661517372	11.1377678236295	6.93325836467005	11.1667850825109	2.73421841905792	0.95366852251242	1.07491006492953	0.3385064093831	0.519161663273896	0.730090374545067	11.1378287752561	4.72822351500749	1.57846375208398
2008026	4	15.9898413339482	2.4956147779178	0.175382893421607	2.48830731613978	9.29262782970762	1.19059024698959	6.20313706581462	10.4168480926205	7.53915698724425	5.96553701079795	2.82993312614017	0.911053848713277	0.876221284268568	0.340589205581508	0.776539852323641	0.760819966085982	10.3277690154185	4.6391612138652	1.82297979257022
2008026	5	17.6648315319562	2.45089645781926	0.17658866668021	2.4029850913449	8.34376666431788	1.31664306632366	3.06382321835326	10.7889588616629	10.0923820507499	5.23073417944192	2.62927181519437	0.893665805742893	0.410849343501255	0.325979672462035	1.03605367467282	0.649160459264307	10.2054708859835	1.74227923323875	1.98526449394981
2008026	6	19.0179126456614	2.32959645462047	0.176862314912314	2.31306608591217	7.99681881881283	1.2718492135114	2.88451712726528	10.7434928659851	10.6209306974417	6.84416916710556	2.5119983589115	0.708923250454516	0.458893803315919	0.316351505583985	1.09327307068845	0.6894535354307	9.4708531625891	2.49051647530356	1.85007258131231
2008026	7	18.8300972012398	2.29642621920327	0.17652381169058	2.20226777212005	8.42195906017318	1.3323960407172	3.77066917384471	11.441874497581	9.58865396608052	8.05409433759868	2.36186299054398	0.621078686544069	4.70658230413001	0.319571625540564	1.23214402623313	0.770576403356443	5.71345125971168	7.26293646071845	1.62345091591478
2008026	8	18.5102274351836	2.34171244647926	0.175027189684914	2.15399585142803	8.430056225778	1.42464722768594	3.37748875071818	8.73299602615494	7.86077337011683	5.59701661242724	2.16727337293092	0.59949964513452	3.54990407091169	0.35152183384582	1.10513305938808	0.711652273943102	2.69506343466701	6.47364184899747	1.6505509324401
2008026	9	18.4540940621152	2.58032016648811	0.173381143449733	2.27084770951255	6.24418544476442	1.49330657641629	4.13945327543778	11.3243510439668	7.43705611590108	7.20154249402397	1.84638456086486	0.722713213481479	2.64800917822009	0.409435271930531	1.07286912734103	0.721854238317338	2.14991818990039	7.69158916081574	2.86764161784029
2008026	10	12.3580483734959	2.64267114585047	0.182295186415873	2.69851598435137	10.154235570482	1.59265808242274	3.9557850860864	12.2381281940438	5.83078517765852	8.31693315854493	1.79734428392403	0.942384425988171	2.55718323046565	1.26201997571587	1.11387892052468	0.771352902646032	2.29577227885942	8.12350350630739	3.65930212742185
2008026	11	7.48730325925196	2.88399832260791	0.207331734263081	3.55541559568996	11.3175990747083	1.56540109029926	2.7738090675641	6.61188313385732	7.12294395535065	6.62416423757249	1.62487395884947	0.830275857805162	1.53200854662871	1.2376643559743	0.885177626225669	0.846343932661062	2.98033583046751	6.9401376836459	4.01644090975489
2008026	12	8.39971835149559	3.44241286276927	0.291109347855014	4.08834036952692	6.21728001055439	1.5310272820659	2.72525862648806	4.95264940026639	6.18004963560134	6.81932674234607	1.45559957450143	0.680631740791882	1.75347779324937	0.786407072984361	0.685985266810373	0.912286374085848	6.08237224923779	7.20322053811671	3.95457502266932
2008026	13	9.66143792053337	3.98619798446175	0.291821363907107	4.53684293172736	5.01115606933426	1.52529342730713	2.54459420402307	7.49796890396827	5.70958572774855	9.42368984050351	1.25903673661661	0.566999938343393	3.89302159111644	0.563396093785325	0.607982504575126	0.893228548168952	7.61728906766318	6.79118058793779	3.90686459961433
2008026	14	9.35866192483545	4.41747926446645	0.325343664166193	4.25348246173109	6.24264388840193	1.52759761936735	7.71701388745444	7.7477911139274	4.63979060321199	9.19993124436735	1.08585887735477	0.490359534282471	2.65165904208051	0.420698494311164	0.750299207601101	0.849781498730673	5.0362249936632	5.31214824525153	3.67351137260269
2008026	15	8.35244266942637	4.37534652967929	0.323862960293748	1.80110308609893	6.1692039077801	2.02690586601595	7.38939453991572	7.43038794580801	4.85890752926186	9.15268115173342	1.05717300869845	0.455400696375364	4.57152987946712	0.394382983346364	0.603746903765454	0.952901110465141	5.12335072773964	4.87516288587989	3.49693600653294
2008026	16	7.36431525356876	3.48669880880461	0.322447690580232	1.08142217172045	5.95696187233927	2.5980053177535	7.31416226456347	7.63450334607497	6.88185366287586	13.1108140135415	1.06628613840254	0.448414309088124	6.18417883314748	0.552767271841021	0.764022459594536	1.01562603906196	5.13052699970063	6.13578959110202	3.14185923196808
2008026	17	11.6221647372651	3.27918060476517	0.406998911166482	2.30627063208977	6.44037216814052	2.90995185254093	9.6140662561427	7.84954690949132	6.96203613811546	14.4053742978213	1.20272730713576	0.431765893059648	3.02999087815623	2.24818467624765	1.09934171944452	0.669871305747348	4.68215929555255	4.89171214982211	2.68535430811412
2008026	18	16.7751078500674	4.08101616400208	0.347269628255065	2.60863050135987	6.54943211243345	2.72282802947704	12.259779460286	8.28782859772614	7.91734806256144	16.1326821248887	2.11221302761679	0.406678587746654	3.08998016887881	1.4472028453991	1.09183951423653	0.657177829877613	4.40490313688988	8.95355004982794	2.40934425560769
2008026	19	17.9284424676622	4.64282420276081	0.310938976344352	2.00116783875046	8.30494948249899	2.21434861632136	12.2185799878999	14.0891669977741	9.87099284039301	14.0226414853581	2.61912048505436	0.373556263630477	3.064943143977	1.92472855765039	0.940514089224967	0.756082791985766	4.16071246085294	8.52327707732487	2.2249014142054
2008026	20	17.9816534150269	4.53229551652512	0.285466584523414	2.07295950524015	10.5942214920644	1.6749866688934	10.1069181959178	15.7258155102928	6.85858981576307	12.8642934202725	3.1656362689236	0.345067606621945	3.160083883666	2.19143775108631	0.805436474640753	1.01122913443476	4.19092406846167	6.33222185030055	2.2267487948924
2008026	21	17.220530487648	5.81872270051928	0.265362351656173	3.22909858922183	11.0299174562603	1.51959700296917	9.83246209507077	15.1569382624348	6.61722521517893	12.1026102030054	2.79410948457175	0.31434554685699	3.09504420458842	2.60809151050914	0.703498732949111	0.781034179883793	4.62905324271775	6.30578177583406	2.0534529840589
2008026	22	14.3950358488432	5.71342189297547	0.238399934412681	7.05566117299426	11.8567096491202	2.10839902177895	8.65188044465404	13.9801102002876	6.51936664661746	12.2528829581614	2.63890309530401	0.269919742930682	3.20246758183099	2.71733750325473	1.0207036654189	0.472864670733838	3.22169467259023	7.79445859789858	1.37852446394187
2008026	23	12.1726964635283	5.26080840195038	0.224411357144082	8.41525762432935	10.0709069258516	3.21873791411095	7.683052161587	12.5054012195814	5.89434787565301	12.7438040539091	2.81788573851072	0.218126473362112	3.38965917134581	2.32219953132406	0.939130149787451	0.247495408114464	4.48468134309992	8.12477370224789	0.766416291328004
2008027	0	10.2824246239148	4.81958420281543	0.214531564299204	8.40642696472685	9.16600779234549	3.69398004648288	8.4978419701695	10.9246333241004	5.57246026983057	12.7206831422576	3.22169652651007	0.177221347567147	2.70082150657486	1.56409960400557	0.995199039497569	0.414783966323055	5.90881790545207	7.13631893238025	0.843067803013041
2008027	1	8.29293465740892	4.25493022703143	0.204232355618487	8.11638725317165	8.8738501951557	3.50303971902688	11.0698077566074	10.6641019264027	5.71240878066497	12.2197920297056	3.44590373835087	0.17247257616827	1.80902282822357	1.58437399471533	1.21097557926368	1.86730046923059	4.8499052169128	6.69043995628868	1.77144652237382
2008027	2	6.63560253490715	3.64525095175207	0.198240678687393	7.48855441186886	8.36394169728374	3.39562862446992	11.2244554823259	10.7599240353164	5.85301556792129	10.366376646799	3.42144677300008	0.209996841265613	1.44312096346257	1.76217498777743	1.33130119940712	2.13463779410006	3.28501489571592	6.72893600517298	2.28421803846174
2008027	3	5.15296722200645	2.75536585902582	0.318932366812888	6.12141904479761	9.31759522424167	3.10538100725003	10.0073639421329	10.1310804890902	6.74737504172143	8.32901649585736	3.18251177399589	0.327330593710928	1.21793027841591	1.66367941503959	0.778800597751103	2.02982708655986	2.6956909381305	6.50416871592462	2.3037781829125
2008027	4	2.38279877838816	1.05578100164158	0.278374522616911	4.90067015724632	9.16176366326229	2.40994486622776	7.91956916427047	9.15234427767073	6.238381651354	7.19489467650301	2.74557345883793	0.334147450638441	0.967837993108636	1.56333992480269	2.47249978774019	2.44931797772157	5.28572065421266	5.47707046739932	2.28186656715354
2008027	5	1.25465328645668	0.355743930421679	0.272695202656149	3.92065354014608	8.99470749384206	1.30449744210852	5.93550106014845	8.10196433488526	5.57815222773844	6.54661077557112	2.00998149243451	0.28512357006716	0.820639247522121	0.894266079735127	2.08634890321898	2.64133607002106	5.41585688200853	4.74775761921467	2.17508660968162
2008027	6	0.785735987568693	0.105065199792195	0.320676195719983	3.3482935945459	8.90865934963774	0.480224024652438	4.68157507819349	7.15207949746405	5.62291807076723	5.77552604396749	1.70794198681825	0.427962710671825	0.748908728587466	0.382070559848874	1.54063630874656	2.40040069467916	4.30791501294223	4.43034906720754	2.0172451720945
2008027	7	0.559226150580418	0.0571391728791779	0.318473319941419	2.82558284527129	7.81934910468865	0.114599284906149	3.96481381337309	6.41069462408496	4.96669645742555	4.91257716073625	1.8560989536287	0.654634392128847	0.912892603829879	0.333488401796919	1.22650487055617	1.98346736932234	4.9011598086805	4.26608291138364	2.22910677592484
2008027	8	0.801535017176986	0.0482433330211983	0.358435565510293	2.13909719967742	6.7137884318357	0.0225991428600273	3.19933818134312	5.80661149268402	4.42232893001701	4.02201446341338	2.04617247852395	0.617510857086156	1.16888907872734	0.314598508530899	1.00098184286233	1.6096973285554	4.40539628790333	4.12031978383386	2.71579883116289
2008027	9	0.923184823030833	0.0397445154144272	0.428984799522529	1.47009256957847	5.80343321780619	0.00730579727833937	2.66701489363534	4.79308205707391	4.19570020486167	3.53013321282241	2.24821658777537	0.757865792645589	1.30030370063004	0.31792471876367	1.11216246631699	1.24702664391987	3.50301615356553	3.88565419860896	3.38119137285179
2008027	10	0.922205715753099	0.0291580192042074	0.406771165914577	1.54246540419279	5.02695479572447	0.00531747722708069	2.92155839462814	4.43567978314319	3.99096763363755	2.86039801900599	3.07720441920726	0.597989453034639	1.53691193806641	0.344228020501381	1.76225977591564	0.903566669973202	3.06830053137314	4.00981543964293	4.22070308315242
2008027	11	0.945298466092438	0.0223609702197687	0.348545281259976	2.04014555873077	4.35632957269522	0.0129142255013305	2.66373171898514	4.38550776919666	3.91478341361967	2.33266820918229	4.39411590005165	0.452426622926076	1.27405485961056	0.345658569343436	1.62975973330515	0.902805354280874	2.67056172641656	4.27446082171119	5.10184181862773
2008027	12	1.02441754755616	0.0829806190958032	0.310996378331329	2.42338008492992	3.7742877511961	0.0301698882391523	2.50820236136551	4.11568833946187	3.57943925510909	2.1067674267317	4.39654754951339	0.37418438277543	1.15534046591804	0.351779145289686	0.943944673349029	1.13341585330103	2.87850851185773	4.34896697209972	5.69847255874788
2008027	13	1.62605062262347	0.497072801119754	0.292184494712565	2.16301371179628	3.29113683859737	0.0394445487998042	2.12876746036952	3.45521758034482	3.46564737483046	1.77029650288242	4.0302646171692	0.317118953607444	0.908048157859367	0.357967741126955	0.652689646222196	1.32147953594353	3.28630507258689	4.30866347073049	5.6811880672438
2008027	14	2.68370276231472	0.785520010548753	0.265242038102397	1.8215284078327	2.97987026873852	0.0442284159688459	1.73735805491749	3.41219087498385	3.62361399687426	1.45184036269542	3.73889473276343	0.26871626947287	0.782466012353656	0.361496969006515	0.901744595138442	1.32885277619572	3.34022196357092	4.13323395866941	5.24509734246746
2008027	15	5.4872487790409	0.74085458265257	0.231865053345395	1.62441463450948	2.68488860720673	0.0665579722657634	1.54256401934045	2.99719544029487	3.69323640918893	1.32227478714303	3.73122990658308	0.260107710163671	0.795943460748581	0.365887391276677	1.53931927534628	1.27132196024863	2.96819923119147	3.79974237670546	4.92639145344439
2008027	16	7.06836856941467	1.0876604396385	0.197834739991635	1.35873277938578	2.4221784495521	0.126443385512205	1.20175001884803	2.59949407135664	3.66179476590185	1.25722380558139	3.54059705140713	0.282581210649494	0.791052919941337	0.367396415600233	1.41219041600613	1.35280507166365	2.27454536142401	3.25015327678215	4.43817900707572
2008027	17	6.3354222342761	1.47173794960151	0.166248086705105	1.09550133506542	2.19982298171332	0.235883375572085	1.04031032658676	2.39678003266955	3.52454297553468	1.15082590553687	3.79416901840458	0.323965286238181	0.775305224649627	0.36646502006977	0.624377760229734	1.4718424151206	1.80182084910478	2.84869402817084	4.16970948247396
2008027	18	6.49681912124481	1.66382756855862	0.144599788187276	0.783881167585545	1.96467435280921	0.355999994734746	0.886839181427974	2.32343660970676	3.31330762018581	1.14223052561214	3.99650538068335	0.354436345444952	0.743757314165828	0.359912703483135	0.33717871587774	1.48894931514337	1.67282805130609	2.90813066221784	3.82913667708856
2008027	19	6.4815915519126	1.62314291067103	0.136045264569107	0.753103450084376	1.86845386587076	0.540768063073543	0.789146669164518	2.32783015077305	3.0739833091578	1.08679436696482	3.86623604494311	0.387787749286214	0.802997881555797	0.354517387522653	0.767256982264852	1.4824125747136	2.08616040229922	2.58068230193586	3.49306453406835
2008027	20	6.68002966787645	1.46354816387175	0.134570472126399	0.710963497684389	1.78620598132203	0.577761390878925	0.742638286816347	2.462714160213	2.87929368581778	1.09511529138905	3.37207128765567	0.447067806540102	0.849614573055296	0.361783759204745	1.30401358178983	1.51373753300326	2.32518705679287	2.19949848809184	3.24457518277569
2008027	21	6.73937933834018	1.47522751547815	0.121026514892641	0.685301178981318	1.72471943614099	0.593178453784215	0.713941612007872	2.62455040761094	2.68830355617658	1.09963666698618	3.2298209019878	0.573803315919838	1.04768508406053	0.380745918708205	1.46252618009933	1.48216760846775	2.28903042146358	2.10445635013711	2.92653545547467
2008027	22	7.01475663703672	1.58172926097758	0.113137074780908	0.682250069579732	1.62455743976258	0.542987199792098	0.967398370082425	2.64248833640084	2.51262801101871	1.31500854593456	3.11346621055628	0.721173300658758	1.34054583203846	0.475096364345268	1.26546423502252	1.4730492460528	2.01083114320852	1.70300982133384	2.80987874608475
2008027	23	7.43929740082464	1.68825427472533	0.10795166269748	0.664108323783911	1.51247471712741	0.557279173922377	1.05485241970746	2.56886864844794	2.52147843440276	2.32402980143986	2.65867324038099	0.830351552225323	1.5094386246093	0.787728549767686	1.13214759329987	1.45851979385267	1.80632095052456	2.48585098920089	2.74328365087021
2008028	0	7.3123632782868	1.78728933313387	0.102685241453743	0.640110364173488	1.46135553034794	0.718021050381039	0.978918682790447	2.28511978280491	2.37031071444798	3.41568610920751	2.34560863316935	0.915303744529193	1.52693954918489	0.965832133628074	1.05307182770813	1.59548332438699	1.67882121375223	2.7188287495817	2.17372333772458
2008028	1	7.02526914967564	2.02506660802813	0.0966957284785034	0.609846945993591	1.48190706925929	0.690771163769443	0.986134034338107	1.67705509584625	2.14859754940956	4.83683664631941	2.03979161253066	0.918936727994623	1.61315471049295	1.28736783590889	1.01593120759888	1.84168250281739	1.4931059901649	2.54854193897891	1.61077197579592
2008028	2	6.36757718461066	2.17484716116365	0.0915261329153962	0.564841495132855	1.51302565184419	0.614039008278841	0.985929184237514	1.35199426741575	1.98424551356882	5.3058929765474	1.80083083028696	0.83469148645938	1.64712447638109	1.21465287872893	0.998439555557178	1.89041459813748	1.28464008650309	2.25582470683668	1.34253704558134
2008028	3	5.29516321054501	2.27251009225793	0.0887580689922823	0.530844211291023	1.51865144113712	0.50816269001112	1.2163615087011	1.3781065128545	1.95681552208973	4.91961386856442	1.58524925648094	0.765667550421951	1.34294191419592	1.07037704567885	0.937762387482865	2.14716769109093	1.11885285905782	1.94607397514579	1.1603277902299
2008028	4	4.67326832811309	2.07904548416148	0.0906623783541038	0.498895946804126	1.58748437254525	0.394314075061097	2.16481467173543	2.08028535152881	1.92002121979509	4.1277695885416	1.41997015885843	0.727594530953599	1.17731546461523	0.935892873388139	1.10094797396602	2.25767956291631	0.991963359503075	1.84815126893322	1.01583254916695
2008028	5	4.4119244779483	1.68605108250019	0.0975132279380857	0.44597991756205	1.52788701966637	0.310156510100445	3.01451254115731	3.9432289724056	1.99411378531789	3.33606958732018	1.31689327733775	0.668417251160541	1.13210463766018	0.828449093789993	1.06591357339098	1.74426687201135	0.876115010288812	1.90223006024912	0.937099460403627
2008028	6	4.26674826834368	1.63891453724958	0.109768320828265	0.5192762752105	1.74236852366657	0.247871365472694	3.00721223126534	4.98944486014239	2.16023872153595	3.29063582929252	1.31332197188961	0.492974873541276	1.11040531755845	0.742016090408019	0.973890820105867	1.42927404750412	0.774244499646556	2.14885017478022	0.858883964250276
2008028	7	3.90352389631251	1.715903554564	0.126182327465751	0.510854242463862	1.47230996207029	0.203191404684664	2.57178720408187	5.35082541757798	3.06054094415485	2.62506270863358	1.3620862651989	0.435215229898654	1.15883015346676	0.668489916564468	0.85855020551703	1.05868750266722	0.713864551149219	3.18179012480141	0.79796632297224
2008028	8	3.73639815764806	1.66743792924985	0.142580258953013	0.39356290983525	0.98546718727954	0.188992008542258	2.06268791982314	5.34572585898787	5.36147114762845	2.77559358240619	1.39832569151723	0.422812004008011	1.09907256564284	0.618955293942253	0.851602570013543	0.744474694052896	0.690925125870565	5.28572921957289	0.775619923570605
2008028	9	3.50927905724395	1.73357332245564	0.154738667790833	0.331432685140572	0.855991273236411	0.199902664380275	1.64652209767135	4.88656270735917	4.31024228714557	2.48692936045129	1.50151682822669	0.424674045934888	0.846370541350245	0.597874303878746	0.786989521204921	1.02513917671447	0.646016655171213	4.97179909034914	0.822291464473699
2008028	10	2.81405894797996	1.83895794714221	0.164593876397777	0.299313778574612	1.92546903117176	0.254373197917161	1.61898181115571	4.1135259380478	3.81968613431939	1.85608423456739	1.85007850189643	0.434527692302582	0.523292285611154	0.585471241086148	0.729220280830182	0.986864937006257	0.599236456407917	4.85601386194991	1.17504032967705
2008028	11	2.16851079577018	2.64608898927352	0.256635353034103	0.278553545022955	3.05937243018587	0.378361774977353	1.65266688709867	3.90857713101544	3.55823059391402	1.60885692907539	2.11039123085712	0.398251522900491	0.417925395607097	0.570713702360073	0.80199061695198	1.0547990252536	0.546868811900177	4.53694485801312	1.10857513048023
2008028	12	1.51084251386143	2.78690160312641	0.432109151945556	0.306910380688473	3.63152134812645	0.624859655065756	1.15220679449334	3.50637907284892	3.11339369954918	1.90196917001563	2.00917735854355	0.405084520837089	0.666258426092479	0.566195247837736	0.891220354919054	1.08345243425847	0.560562709963853	3.8314353647345	1.04292974073863
2008028	13	1.38884283762736	2.25879292584601	0.378769794385543	0.539833191404149	3.74277836717719	0.914857611438002	1.13182474999605	3.27781379040364	2.66743495667972	1.82565016445151	1.80546427439113	0.397880713135214	0.838105716732151	0.573442548944762	0.991337190262794	1.7059809895568	0.584140057376492	3.17812679329392	0.973450882000993
2008028	14	1.41816534472865	1.75352529841324	0.431916679733473	1.02413374387461	3.28618894715981	0.997715296982979	1.14145571913994	2.24254606379023	2.2753086832312	1.80124528087279	1.91773319079122	0.404513287978577	0.421054282203309	0.58213762981096	1.09797968477951	1.41363440455185	0.965747355213565	2.68164062204319	0.868748913890985
2008028	15	1.55374796634663	1.25305152377868	0.414835877093503	1.31880015280111	3.09579330332858	1.03760454148542	1.07966217119184	1.58769451026506	1.50577582701838	1.86591811308059	2.4135018641104	0.484757003907441	0.344989258297325	0.579424640319885	0.810166751552271	1.00668054489513	1.65303428424941	3.19324292484269	0.797608431467535
2008028	16	1.86623099349433	0.679754933793622	0.361494421348752	1.28827812930807	2.06922740282412	0.985536060817571	1.27902581067209	1.19867953156898	1.09196097934294	1.85764129820311	3.06842994070983	0.659545719230685	0.648150124709301	0.565206607868506	0.613704823321977	1.25827477101582	1.87432030330371	3.63656972414398	0.805734833872504
2008028	17	2.16857806848722	0.510229331105115	0.33909819968022	1.15242666549748	1.59079027384938	0.93344460114368	1.28639628051513	1.14813685620317	1.6165104971593	1.68291716875701	3.29258854573723	0.726339610615554	1.06371779804213	0.54724778184078	0.490849625005697	1.43229219349833	0.990439767782294	3.71225502459332	0.728336067074622
2008028	18	2.27696434753781	0.466833601709472	0.333653707415779	0.892717616188037	1.2240187151869	0.896463030809972	0.850023316013779	1.23114918936133	1.71654433000919	1.38675232831795	2.36341247188968	0.714779103715057	1.29707384615208	0.524119769418286	0.435780561930806	1.18788846996328	0.570669018395953	3.36116741710601	0.667081809275428
2008028	19	2.30710369824745	0.412109070997015	0.331978992171423	0.708910713928822	0.965394218662123	0.782143276261627	0.672615034089838	1.32784415314696	1.40795898701018	1.63306612119733	1.89507972832494	0.678935554688464	1.38485820250436	0.497481360970299	0.359532818884039	1.1852799095317	0.634983125370788	3.70115656557561	0.631790412257063
2008028	20	2.18282540880205	0.355804743202175	0.321589005758499	0.579758348184701	0.894051866007004	0.883744850456235	1.31081079438163	1.35124570049709	1.75123304491866	1.92767915341221	2.16405167318607	0.689763893970107	1.40872002573023	0.459691203441166	0.319115478364342	1.16502712177893	1.61680249299085	4.0237547189877	0.610353269347664
2008028	21	2.05270356196287	0.333973964750611	0.31473665973041	0.486430945010865	0.942810614619031	0.799604950249653	1.56810110128166	1.40410059063119	2.19231068382353	2.73048777725081	2.19545612168325	0.838878210483521	1.38611151541849	0.407088471124664	0.290864853886671	1.01965878562877	1.9018291282209	3.432986592954	0.609555265519496
2008028	22	1.89201987147928	0.334753113131211	0.358749729888511	0.408764368625841	0.999779845863779	0.709171266518551	1.48539219575984	1.48466628453815	2.49194958004631	3.79562698377945	1.77018876139888	0.741448556812883	1.47536029658856	0.360927714223253	0.285976246652225	0.821632489393894	1.93867982735678	3.07267289525982	0.622165839140587
2008028	23	1.68619721504285	0.355152907275382	0.435851524771402	0.379192304961561	1.00609777441222	0.637323096784917	2.06706921954699	1.55388350929377	2.14745321944812	4.22945460143993	1.43339082004311	0.628850155396149	2.71748938711596	0.328190067447671	0.285976694155194	0.738116852441982	1.65112929151087	3.5649387611238	0.642045566079843
2008029	0	1.57283508325697	0.468328367257442	0.488570841686676	0.374951452054879	1.04615845234342	0.609910996956673	2.72907514462231	1.60380777429831	2.8851928118382	4.42456291587461	1.19545860222252	0.710040631899168	2.8621487948062	0.304317548282624	0.336061999079968	0.69053189289188	1.39073938630326	4.6329707257837	0.659185878427181
2008029	1	2.47515271008184	0.53669599979143	0.519178074670287	0.395139406818028	1.14351448913591	0.545306473735802	2.98628669362765	1.67098222120598	4.30086380388254	4.56451254885571	1.00519446328756	0.766366141632262	1.72182085098989	0.291383053860336	0.393291952765999	0.653983175242627	1.25554625172067	4.95944071968716	0.656101683079066
2008029	2	3.03384329669429	0.592460782339854	0.556174708893484	0.483145437706176	1.26400597761629	0.473928236632494	2.60211178315371	1.75510403434466	4.73350694038465	4.59581693596682	0.879634961867495	0.777178196070302	1.56128168803437	0.290715709453757	0.415003048262851	0.615773091083839	1.02980682501873	5.0455899055821	0.611174646490117
2008029	3	3.37557919512716	0.633542705428673	0.577318246301406	0.560874047442036	1.26414299120232	0.447531698250327	1.92686057818091	1.66483814314334	4.22118185602901	4.39892064869357	0.920385263529245	0.828156741505148	1.49850583635258	0.299452455060259	0.371853525196777	0.579244992325576	0.840861650191745	4.57013084599927	0.533280213286707
2008029	4	3.13353353610492	0.698087920868194	0.568360530365209	0.632555454198082	1.22707778240383	0.447116422611916	1.64562325200013	1.48783685804643	4.09178771805842	4.42251179369905	0.98582612095109	0.844327342936114	1.25492286827579	0.311832592691703	0.4814231442369	0.541728861422696	0.68383270099105	3.77913361464069	0.441146985775976
2008029	5	2.61884685149495	0.788213563886462	0.542985919259724	0.662053398245032	1.22535287133922	0.446963973112194	1.57758258736926	1.46552028204009	4.73282519257267	4.42676371981333	0.900895353853215	0.831919673854512	0.837771457250625	0.32673965801327	0.669032138722657	0.497239820818639	0.686112438329066	3.59555675646211	0.363755459256019
2008029	6	2.13980436504286	0.709763167496194	0.540722999860693	0.6722339401158	1.24852842643402	0.44571607295182	1.74360804077562	1.60351268527614	3.26832947009664	3.87289299563632	0.738418910770487	0.83259342806147	1.08998944808741	0.332559590987872	0.516324403086373	0.45669202835676	0.75822178373039	3.69274667673625	0.352940893400985
2008029	7	2.03119489465912	0.656560799239255	0.586869734018706	0.675396851450854	1.20756546106384	0.444318965155178	2.05632566782855	1.72325066673683	4.65449994408864	3.61123288760915	0.997505841573002	0.847955546050515	1.61747999496737	0.31819278514746	0.355496105634119	0.419945035136231	0.890060076253639	3.75438142910722	0.582285792408333
2008029	8	1.97988634538993	0.643928873608997	0.647508350925793	0.69665593911299	1.24267286448777	0.442939114718538	1.85151016781598	1.75202552962895	5.27604853958362	3.37220410379498	1.53895131724882	0.929454244380803	1.65395226465346	0.287438560692389	0.32031272425447	0.388919793328461	0.933383359624507	4.47928176008483	0.937534382712413
2008029	9	1.97144262884036	0.652286903798439	0.70815146514934	0.750409203160163	1.27078173763066	0.482186543436905	2.36212371172358	1.74535895191244	4.62398074392237	3.3496902800724	2.22529508588842	0.894155327983111	1.31296167494966	0.296240385488435	0.335001577235215	0.35571032404802	1.06252341387117	4.51424737728501	1.07833542132161
2008029	10	2.04304660597129	0.687204727915879	0.703333415579685	0.704878913948628	1.26935051799911	0.53772316754035	2.31661565974392	1.76199627106048	4.14121508381691	3.23973119423956	2.3908632708671	0.761222372385775	0.923357305400646	0.430836932040991	0.481820178694178	0.371623857616239	1.33362188811052	3.68081394945211	1.15738728135566
2008029	11	2.60738745615495	0.689647221729042	1.20476962136842	0.650973028023602	1.25330982734648	0.622347710582154	1.92378121880813	1.68120414837953	3.14869047171392	3.03302751504885	2.5131600056118	0.665072908161314	0.852818513047632	0.388456339089172	0.562540099661394	0.551557357990596	1.43806608505508	3.48409399896442	1.11233046300197
2008029	12	3.31256505429113	0.670012652840613	0.989049422695317	0.634399856820562	1.1397321237953	0.646273630919492	1.63495594138942	1.42144640937982	2.84522730460349	3.11656124498589	2.46026512324693	0.74400092774675	0.411160293138199	0.369176388969453	0.532322605429621	0.620092639645391	1.43901494352485	3.36568874597584	1.04662127755141
2008029	13	4.04109083888869	0.653102461135153	1.21703858498211	0.632810017325115	0.958560183655383	0.650249841366891	1.7099098107516	1.23990162603902	2.41748459185227	3.39352187901298	2.24431400560574	0.833595370235001	0.360028032024329	0.368142487123328	0.554888942913718	0.522774356800055	1.39477871807393	3.1124395303314	0.99379356821589
2008029	14	4.66393579124999	0.686918949594443	1.4400077611283	0.622323351554671	0.759849011701619	0.642586233743345	1.78133521481745	1.18451241639119	2.14954229334838	3.92657961550734	2.09309301370992	0.791707208252609	0.408395634534113	0.423740880602803	0.572300976578522	0.512015858676287	1.48379695955097	2.91061963079726	0.959367642127728
2008029	15	5.30903514778099	0.646720689713959	1.10919689719923	0.685947756639176	0.584685014398599	0.627146207766021	1.96915201696917	1.16387518908443	2.26155959609972	4.31917906617811	1.99149249098303	0.717608366392382	0.29825113735105	0.360921312620574	0.561019676807057	0.469479085247811	1.57722595878383	3.25468853211422	0.898918897464591
2008029	16	5.86825238305244	0.58545069883564	0.927326025143633	0.678723610671806	0.518783124816832	0.593517059949708	2.27715569874503	1.08281958748042	2.4333353293752	4.68475311592151	1.88977334806162	0.724051850134491	0.218601520669596	0.324994809985121	0.528646091483453	0.418297306868569	1.51495766255012	3.60130307004904	0.851146528082974
2008029	17	6.00916524513364	0.538049121574739	0.844609625778137	0.654107733115697	0.520737257924168	0.545827607429562	2.64577232211245	0.989118387439867	2.64813364267648	4.79972617328722	1.69365859585901	0.905936722180657	0.164558779041131	0.334918182902368	0.492801115792415	0.426651662785818	1.41707721828982	3.84207700536771	0.809721114760016
2008029	18	6.23566243271231	0.501184164892996	0.784825735370055	0.595236714554253	0.553543973105346	0.496375640263319	2.96993231196388	0.93264445321523	2.97028015308558	3.79056125585888	1.1044368359335	1.0825649483831	0.157848295748902	0.359471242978101	0.448060405895053	0.433066358531137	1.26681600988228	4.15230991670684	0.755377449352776
2008029	19	6.45593227840617	0.471841592801638	0.711974442641533	0.552019946373721	0.660537863090489	0.451607017544182	2.84085029807478	1.10044791977715	3.40605855519049	1.44957746108591	0.651981881338259	0.865847354840759	0.16181946735672	0.368417057219133	0.398722155167879	0.435048281027668	0.969139262418582	4.14526948422355	0.701249994195037
2008029	20	6.51503484617738	0.447602478275568	0.654975402830804	0.518730919098041	0.699477087758401	0.417887423474572	2.31719759827768	0.908757869318746	3.80654845170387	0.42989987539706	0.606809046964283	0.735931161471949	0.168475747570397	0.339646136439874	0.368998500384204	0.433930379155635	0.569384619937526	3.87540883420401	0.580556333692262
2008029	21	6.55099242166138	0.434532349171982	0.614402760550984	0.496290726216384	0.72216636672221	0.389178786343949	1.52445161430883	0.779538565635719	3.95355146176174	0.18486578296652	0.648593981980712	0.648100797572224	0.179839190478574	0.297548328058525	0.365159601324315	0.426580927077916	0.423682947175927	2.37634548222961	0.425767590039915
2008029	22	6.76211339706173	0.508756503929301	0.571510010658544	0.482517282712237	0.777380955735021	0.347146179297105	1.002118613103	0.718220081581143	3.70020177529845	0.371553167732365	0.97884628735928	0.618731487551963	0.189023911199341	0.264510249024806	0.379805700798416	0.417400250900089	0.448974103519174	1.94162326073726	0.32578610770063
2008029	23	7.02811135478617	0.547829953584106	0.636972787022885	0.480833477675975	0.706797588721437	0.292546609248919	0.608945396557089	0.722780928858732	3.17344335191448	1.19571822859416	1.74760964244726	0.605006934379537	0.208568870493311	0.240166827103576	0.412938177716233	0.414402452841463	0.486326950141439	1.51501278361602	0.31151543313546
2008030	0	6.50894024641876	0.59204080328155	0.648479232541143	0.488374827245899	0.649609102371401	0.251343268831322	0.268583478664857	0.959002146323634	2.50826631051611	1.77974583482174	2.37858121947944	0.465795388198679	0.232103310799516	0.219018158908575	0.425135395946221	0.415960123939098	0.53325947136681	1.05871744069754	0.355678525599955
2008030	1	4.88677777878184	0.616810333380115	0.557471566507023	0.495487749199631	0.632118799961056	0.247298966797317	0.148618881558261	1.03174452471655	2.09832653962045	1.2485824104998	2.3958806400986	0.29543634333564	0.253136083254927	0.203530270807749	0.42300486415427	0.419506793491916	0.559009686884911	0.832736407986074	0.416310305048257
2008030	2	1.85493832709885	0.617006575714085	0.48348254784353	0.497413430381343	0.597185593781475	0.305790816921264	0.195824544433022	0.974164036815174	0.871839710834347	0.63851960323072	2.54141903734201	0.333104207034398	0.267518975383885	0.196206236896293	0.409517139154058	0.411523557227374	0.5747803468244	0.998533539527411	0.457791060588168
2008030	3	0.788942224236673	0.58914555510715	0.422192004055812	0.492359424278032	0.559875950459815	0.402470315520937	0.181222527661471	0.91013908752607	0.266601196951247	0.748163104401157	1.88595397872945	0.785385797369483	0.275365464761824	0.196872764962636	0.396584423259978	0.381763205925848	0.527398584299063	1.08451422321574	0.411914432844057
2008030	4	1.83658195744469	0.548892992826942	0.333823505910654	0.478887495448913	0.521953577853501	0.486780186042237	0.21384567265897	0.992687193011025	0.126954499919758	0.804851893863422	1.20917453100315	1.1863296223613	0.278850862372017	0.201231106617251	0.38771669618265	0.347725426045485	0.465005318272709	1.28304341553833	0.427105429076198
2008030	5	2.04883149326884	0.481106359515299	0.255658977687247	0.474930275591382	0.489822004054381	0.537421311418555	0.345801779792972	1.02228042510631	0.669382791487552	0.809430909536557	0.899632328744267	1.07407268611971	0.359617381203892	0.205541427209776	0.378138733701569	0.329190217458615	0.452523125061515	1.27465567451004	0.492623400637127
2008030	6	2.11471827684638	0.381857863190054	0.199800977074476	0.593222107656101	0.457400688509056	0.54742654827192	0.593817642932915	1.08002892638935	1.52306756773738	1.16666650860043	0.820660208342201	0.634345347878414	0.326439330411862	0.208939184422317	0.368131903497517	0.394006712475901	0.442685121631434	0.956974581569125	0.760550186154789
2008030	7	4.556552156542	0.296360475634643	0.169795611526396	0.643252305384111	0.440049987167086	0.526634459113177	0.62803143247114	0.756537047651912	1.59321274187285	1.97707031405601	0.827055045606244	0.530516814140575	0.344462695455043	0.209775150225546	0.378661827351611	0.419212130969697	0.459841597852367	0.961641142116351	0.488670826733689
2008030	8	5.01534191909834	0.242015929606325	0.15652479472424	0.663056706962293	0.432717822214278	0.465493597213111	0.658885385778925	0.290557170412382	1.58074050261992	2.49605668248771	0.771936250633367	0.681570176884781	0.813845315870358	0.209508871054574	0.555451642989685	0.4334797110512	0.433314803585318	0.915407214724024	1.31903647936591
2008030	9	4.0568151208536	0.232174324253629	0.232306903218134	0.605079482748855	0.442145629051035	0.654761372712432	0.746780591468507	0.386176838998585	1.73265625828171	2.50059591366661	0.918797711131239	0.973231410479361	0.651091127510218	0.21100807699054	0.793465392955275	0.43626703681394	0.387928194074059	1.12463128396994	1.86143578345603
2008030	10	3.36093926371683	0.233522975680687	0.14626488018884	0.558383315091824	0.412324636103253	0.624022746648289	1.35905561756066	0.628819937289464	1.67942871404984	2.77262577874874	0.843667259512481	1.1272075061557	0.822507328294567	0.21673433245769	0.734381818006328	0.410209642537013	0.381123113821979	1.25084677466959	1.71087082782485
2008030	11	4.02248408128186	0.218325633971724	0.115265690373989	0.449179572905623	0.237330870054108	0.701128541915062	1.86777751266059	0.765916758111176	1.23011950077343	2.68941495413698	0.883078369140091	1.11454241358631	0.720746844954907	0.223140350141871	0.526494389351437	0.362450277426814	0.40362755774904	1.59857631330237	1.65806309379734
2008030	12	4.89908671276671	0.173950146566333	0.11138509205103	0.294749937445265	0.292800858411961	0.464350824016641	1.73559269551033	0.759809897318645	0.90696716212144	2.24404019288679	0.811865642701644	1.1784981887203	1.24293151418181	0.228243095689542	0.353567474968417	0.339016735811399	0.431776209027931	1.34124731889215	2.14377283926613
2008030	13	2.69443901730638	0.121415900897278	0.15594035483526	0.222306819559516	0.758422174999608	0.363327824978089	1.71655831321659	0.780513419515987	1.01980254163154	2.20644908162536	0.898170863057404	1.25358375460232	2.48027804738299	0.235801524929537	0.322405639737689	0.329921246449149	0.435572251285937	1.32110511795456	2.4558006952085
2008030	14	2.28258033862698	0.178293810177768	0.214160846109827	0.179909389611574	0.86248790309854	0.334842566579635	1.69806664643835	0.993740966748395	1.28320959810242	2.8698258772796	1.16983321496821	1.33898317639107	2.19409275217966	0.264399875223704	0.289145694568757	0.295584788894868	0.43028541046143	1.56181154017275	2.29389437756771
2008030	15	2.22133866936853	0.176355455850634	0.198115837093339	0.141591936241755	0.79020591925635	0.299229933482597	1.63382619869799	1.43279063732006	1.73246578255903	5.26309716816699	1.16553429217966	1.59242452124884	1.25641306403746	0.275375560816199	0.21641261140335	0.251058089701164	0.450354021387042	1.81905374199133	1.4963826304932
2008030	16	3.32465850605559	0.217693140064216	0.14803198275173	0.142297616305135	0.680552557052704	0.228478333423449	3.24016714579703	1.5078926259129	1.64777188311665	4.7234564572179	1.24069758241647	1.51724360498783	1.31782589681986	0.303684857122222	0.183420844368727	0.171086082128015	0.721053340909591	1.69658787294043	1.12169238207479
2008030	17	6.6572451194011	0.242750776303265	0.116855475467876	0.175229036573768	0.667641510044024	0.103278295576697	3.61477224936378	1.54396277854517	1.98652852892392	3.10600035572484	1.13901067389747	1.43245593324487	1.93502393820632	0.34571859643189	0.171028210123936	0.169044362033432	0.495968452259659	2.518923157771	1.65427181721917
2008030	18	7.02481946354883	0.535118236138028	0.0954698359530828	0.242608631776405	1.02329964604857	0.0748447637174172	2.55925921236231	1.46327926056755	3.86717981944152	3.59219562436974	1.01705685629689	1.50598212321664	1.39648976822606	0.389061465026912	0.168018668210309	0.178238614341855	0.279790215614645	3.79633002140791	2.66593708049095
2008030	19	6.86968684129399	0.844333278477331	0.0831550142180042	0.241317260507595	1.12781859199751	0.199767959207984	2.16244974528753	1.29583294036235	3.95515077761024	5.67342496994624	0.940376235866611	1.3920282970999	1.25499852251182	0.435195964552457	0.166052231244424	0.198692144480573	0.41724387185943	3.55597370653113	2.76584495878333
2008030	20	6.40948822321196	0.722549090707598	0.0788975459222857	0.287232024221513	1.10842382072767	0.244786566157434	4.33964178240381	2.73688584184721	3.3532022967848	4.68425796915506	0.85683277274828	1.24046626450646	1.96302346397247	0.488778351276152	0.163824418811918	0.216968608164027	0.606109697964058	3.11900165051749	2.49461602519427
2008030	21	5.3142617433623	0.579090045806927	0.0748206946454572	0.383560931813181	1.11443685546732	0.194886034358438	4.03725804928444	4.28045096042414	3.9287677859516	2.92669638511658	0.65276846069459	1.15605601723275	1.97809822008072	0.517119750110186	0.157215305946606	0.211915397291418	0.702680051067378	3.53430388832179	2.32764786264015
2008030	22	3.15105598368834	0.65780579526823	0.0739806884095734	0.413682224527181	1.81387836804274	0.181318610804499	2.79909564062467	4.00420952769843	4.54368548813185	2.27683909685708	0.56210518051464	1.00978431601009	1.29175163818306	0.524545449879251	0.153728657373344	0.161318859928466	0.751580117990353	3.89022163147186	1.98349492876037
2008030	23	2.58617258214527	0.886137261351061	0.0923390971431257	0.449070355428509	3.00795112210037	0.288120415268371	1.81478197601226	4.38916662515561	4.23483436268786	2.87872545896518	0.520418510304969	0.851993823810015	0.977719974992082	0.537805693744084	0.151565791023178	0.112204855846442	0.800593861101439	4.13748937801167	1.58750754280131
2008031	0	2.85258708393602	0.913683185350634	0.154703167035857	0.351070645882447	2.80888259917359	0.444631828732814	1.6055800283865	4.40497067970469	3.47499432022694	3.5975622617542	0.502545624799568	0.738976140224759	1.03767602819135	0.549175373767162	0.152136542995573	0.102021741862143	0.791218382100259	3.73944848067837	1.33028837926231
2008031	1	3.68568284457971	0.547853949156895	0.19652952014412	0.38659096816432	2.39775371894837	0.483766414689664	1.86800810500324	4.18321090618826	2.64855962071581	3.82943454811814	0.499247668658731	0.669559299764647	2.05425554314241	0.74957354493066	0.15414104835746	0.276962166815331	0.747085109777197	2.98848259583751	1.0486308935301
2008031	2	4.12318729468221	0.483786398414463	0.229464067982703	0.595942933354171	3.06771631042417	0.459433285674304	2.3540035782239	3.22624594113777	2.59593247525168	4.10954083760457	0.518170901190116	0.577902055583648	2.72374795571252	1.41703746874132	0.142987623038115	0.280802321023043	0.730359057721015	2.67051519466079	0.79134407943338
2008031	3	4.31333897044357	0.504381552576402	0.251870744968474	0.464865579541586	3.49903574664749	0.322588136949039	2.59095578437552	2.34166423930355	2.56270273769647	4.46498856278128	0.674895152943131	0.605030707043509	3.11204144436733	1.26958204802807	0.141900862997194	0.336571548609086	0.802178341569929	3.22390326175726	0.596737573672797
2008031	4	4.821636016763	0.567840365470165	0.257451364696146	0.516214122007991	3.2693903162984	0.259596770520292	2.68833423493723	1.82746334427446	2.8735830439953	4.48393707018427	0.921344472678846	0.844691541424845	3.6080868068598	0.787716403305887	0.144566822327253	0.386468359544531	1.36131821056926	3.37388672563731	0.436315389430821
2008031	5	5.61840258962323	0.608062001402473	0.262534083949988	0.731174171475311	2.77331764563626	0.24965847425455	2.72897137116246	1.8261621229132	3.13488315898966	4.86989058738446	1.08442440416661	0.966625485878028	4.15890958494795	0.706494439687195	0.141551762745201	0.407968975582734	1.74962705516513	3.54102201426074	0.373661392259075
2008031	6	6.30430935053593	0.738600321696899	0.253059309342674	0.88452222962702	1.84082844273612	0.249806397465226	2.82698123904749	1.83248379594404	3.42119478421179	5.54633203770092	1.17912479921025	0.883039081923088	5.03054016144742	0.69666452455424	0.147040477755852	0.392205557855149	1.67856581953514	3.98746175744582	0.328123606778424
2008031	7	6.62970371827885	1.17887736324184	0.238995114039986	0.944771655312574	1.4386006867577	0.26193557875499	3.32248742554774	1.68708467780186	3.96635593245287	5.87432903216091	1.41619464826	0.8618073365314	6.31529937253073	0.704761430460559	0.186611654238605	0.437868133265113	1.61005105295324	4.37554479489159	0.318750843730208
2008031	8	6.46571077835449	1.45902364325198	0.237645524471863	0.826516342477519	1.07351144670539	0.290468691879919	3.73438107424286	1.73245708873059	4.19571031723591	7.04865853132455	2.0143965342598	1.16879711959354	7.32505140132792	0.743412839355721	0.34691003767943	0.502354983669136	1.77188886322947	4.41426504188812	0.370303025159287
2008031	9	6.16249256656574	1.04918402389865	0.269796562764912	1.15088796499294	1.08399805392757	0.57909787257603	3.61173689342077	1.60910816178818	4.8228550355943	8.8128369014361	2.35223005601011	1.23847934954329	9.74516183573721	0.732772115537168	0.501003324555276	0.504786151311401	2.05169951901796	4.96803468158409	0.416074477895068
2008031	10	6.43941548038072	0.575885496268311	0.280547969132244	1.64219429117319	1.49494520857399	0.992826900215132	2.44037005983538	1.32489494084649	4.20615419816136	8.85553012503927	2.40048306313322	1.43680108760031	13.8350526096169	0.888687784063962	0.574971931025226	0.502809706172487	2.08166235502826	5.6663942991648	0.675705119242203
2008031	11	6.80560001003832	0.381547528822763	0.295831299702762	1.6573737666751	1.51288771609758	0.943928220693356	2.25687164252979	1.01030549421316	3.30636719926343	7.81178161688481	2.48417730896871	1.12365262519396	17.2099810368951	1.45789052139332	0.445090169042122	0.741872033930129	2.09928324026928	4.70601342499511	0.748628329087175
2008031	12	7.91497672827334	0.277011097992175	0.265302996860373	1.15174796757923	1.14307250926	1.08467871090051	2.69829332437075	1.00601193097132	3.52305910623758	8.47283441774223	2.30483703049655	1.04973134095834	19.7804373459594	4.11562244201143	0.337657976140652	0.684471939650197	1.75065245569537	4.51581817777315	0.404738589035265
2008031	13	12.8783933791648	0.204591941818307	0.211643259471637	0.697285317743881	0.707648902290268	0.589690715542802	2.69142109735092	1.03029938254375	3.84490659346504	9.73987115335548	1.73166440487387	0.741863065854017	19.4079171118418	4.52878171464844	0.288374795708305	0.648869891872904	1.14492773359092	4.84273159768994	0.713649221631845
2008031	14	15.6036128226743	0.158071557344423	0.188370160443705	0.448514777417847	0.472046181148306	0.41331892331919	2.75942531276562	1.07601524576097	4.66574358762188	14.6214427770267	1.58175589823424	0.486072569379109	19.3493713282512	4.50891135351302	0.253193966208998	0.561892934228063	1.25356879887744	5.71944716073529	1.26633699506379
2008031	15	17.8603113260973	0.134593130032931	0.17008590988579	0.283622924507031	0.396367430269301	0.349461724166081	4.14631148820944	1.31313448474543	5.15173419924114	17.5282684111897	1.72287900957658	0.609817765788359	18.095276076367	4.07100913708889	0.235215544070242	0.547814803295813	1.35604224687756	6.94298344292719	1.327792492168
2008031	16	18.3991278519037	0.12498135221167	0.15707058742907	0.192922384000803	0.351993865444804	0.295555436021508	5.35720886623972	1.36106155726632	7.37202972619391	15.988595630375	1.78394623071469	1.10591164361147	12.5717004435991	4.16929272178724	0.214270888695531	0.524852503667542	1.16511544178981	9.33261411697464	0.845545558723435
2008031	17	15.5316786680974	0.11671058258232	0.162680838128311	0.179331991569745	0.338306845387196	0.25474724741337	7.81488868258629	1.55346526093268	7.8695416695347	8.42959562117361	2.03820756863557	1.32060527330738	4.3254578487358	4.32054952218621	0.22302979940156	0.487452626737115	0.967557718905867	13.0009152338779	0.374611305706554
2008031	18	9.42882529410775	0.186168494417415	0.143386072837616	0.166787337693037	0.357413005827187	0.228045584249125	8.28134313297464	1.69098012604437	8.11801015908509	4.20538963773042	2.25555646763204	1.36036987716732	3.30469459473284	4.99801519235396	0.26432306432933	0.436325950751556	0.876537287121944	11.0105671767534	1.51620587053317
2008031	19	10.0075382389752	0.364695235945353	0.145794654586003	0.150846281123298	0.389204157037211	0.204503263319626	6.86618460168569	1.84179308149837	7.87145414061745	3.80426561109638	2.28870059371134	1.2731084267967	5.30597239209456	5.91300031093704	0.31266646404022	0.324182164886425	0.704873196313059	10.5326738834042	4.87466980162369
2008031	20	12.168636206264	0.375037908976624	0.191085329879377	0.139568052586432	0.467342916958628	0.171478069581462	4.63621595941178	1.84027981217498	7.09324872668645	5.3859612464771	2.41748735347934	1.08172675943009	7.59240627698328	6.45517097460412	0.457787247668092	0.179600054931622	0.562382213006986	10.1219044912656	4.91636535341179
2008031	21	14.6363538994485	0.302491535296853	0.246212372595135	0.158643980546067	0.63163999464342	0.251739905451769	3.911866790342	1.89545792845888	8.08049289869879	10.8549578274755	2.51945003723722	0.931030761709641	7.38231139984633	6.42115696296671	0.530923868642806	0.100577383399594	0.437535576460986	9.93895101072221	5.08779923534154
2008031	22	16.0545716438255	0.270643323192065	0.330763494016624	0.199344105907254	0.682274844617446	0.385995466823473	8.10388653836135	5.59797926829348	7.75906220745685	14.620941153534	2.64180684527174	0.782555965660718	5.47977965572655	3.593453431897	0.519836506492321	0.0987182837865799	0.334918192075695	7.75215505035416	5.02123944056474
2008031	23	17.4260126158616	0.321028675692295	0.411654674286848	0.215504183443787	0.636512660617234	0.238225720445616	11.1576577934535	8.30625654074876	7.62127094494075	16.4331632637014	2.96519122439536	0.68927411291478	5.60433609505903	1.71671257612027	0.469389688456892	0.0987943516994255	0.336126692579799	5.99093128419267	4.78865260934066
2008032	0	21.0615982628154	0.541438330476155	0.571356945622369	0.214119224484372	2.00613399689394	0.197660824803949	12.5331000809765	7.60427505037122	9.80654318183539	19.746410579279	3.79728891084071	0.673510387019804	7.10177613181882	1.92363857359798	0.38420944533282	0.0918138944421171	0.31297709163818	9.55546780819636	4.52803957081465
2008032	1	24.9623468515958	0.614279120792546	0.633934680399019	0.230373128567619	3.49938232112601	0.215988442762714	14.0513173275779	6.09065693372211	12.560965312604	22.0860770117042	4.72691434580806	0.692772561842582	9.82069656793174	3.26194149439246	0.383294982270095	0.0884538724468801	0.251433855613586	13.0941258137493	4.36081764116653
2008032	2	24.7900246396992	0.665178858299544	0.671255774978331	0.274175248760887	3.45712795381807	0.217184786754653	17.8002335649749	6.84387791854683	13.7888014158124	21.3522457211597	5.58070015016547	0.701843153459769	9.60183119668305	3.3944780386639	0.34299664609692	0.115377734104459	0.233933284941816	14.433330818471	4.32429339459296
2008032	3	23.7583066590514	0.924446678243085	0.661377187921767	0.22383728940432	3.2822489528652	0.19252126794987	18.2590932922882	6.23082874220808	16.4534955287567	22.1986066617862	6.34695835534154	0.872424864329013	10.4862582774929	1.95073706715892	0.253386837672121	0.118903509758067	0.259321056323268	15.1328951435408	4.70386423970483
2008032	4	25.1974511525786	1.27691032275017	0.533804027516164	0.207747106855375	2.89287342595184	0.166293810357113	17.1428065636419	5.48674368433142	19.1623458471618	17.7105838526977	7.46408500326179	1.1153574561271	7.10092593135824	1.59652331005926	0.183490201276573	0.112216572157427	0.272500780837761	19.1945457604097	5.21315095515338
2008032	5	27.7518403090105	1.42616427362136	0.383915948690435	0.311511119409927	2.44280644903685	0.157999184113295	16.8606140172166	5.43148791040945	18.5768535756116	10.8197268325909	7.75777343292107	1.20887000937859	11.9536001378603	5.95217748007795	0.148397100316985	0.125819185467742	0.375110818399106	16.9986184081852	5.23660042617782
2008032	6	18.4709722659958	1.78683280744697	0.336551684668903	0.726597655140133	2.26914401744717	0.153404135152508	11.3133564501422	5.96284743292106	16.0804766568193	11.7342718922744	8.50277582488148	1.13412986221619	9.28581915075054	6.86935011191857	0.129555468265904	0.162960409240426	0.557987785694029	19.4441928433343	4.84026630868664
2008032	7	15.1879632693279	1.66755611527091	0.308872215917878	1.10162383613214	2.2517040113405	0.146615135974513	6.49477393080307	6.06712182637751	15.0364199407144	11.9710939086572	6.9427187699628	1.13296734322553	7.95632248877585	7.43512974298808	0.115404896489352	0.198970472831498	0.319870730611999	18.7265817032898	4.69231819085694
2008032	8	18.0666166109992	1.53282431182181	0.261961783583941	1.46774470325172	2.33574575830541	0.217508377824349	5.03906639858083	6.66639422672531	14.6137150165468	8.63648478693073	2.8710981161848	1.04739100044755	6.00201213726864	7.33766778659001	0.102059908791461	0.209540573764409	0.418909449574961	14.7171727210586	5.58672179522722
2008032	9	31.9507204920453	1.72225268813139	0.223828683614002	1.55475922226699	2.3466777347093	0.321190346726256	4.06878614654036	11.4707085496646	12.34837651837	3.72352044301413	3.54711287095675	0.925107116832104	5.63533687090737	4.77243302177383	0.0879895884438642	0.196241864962461	0.896551903478435	9.89568577825392	7.25609730184576
2008032	10	36.5707162331832	2.10204601831215	0.239960836600444	1.38646414620371	2.48673295189296	0.43027189701446	2.58449712469825	16.3896117923338	7.99569384538777	4.81704602941909	4.24003495744049	0.883735726658603	5.19479003820017	6.72743136615423	0.0764335572173415	0.163492392419516	1.09659417828887	6.90487125945066	9.51667752527772
2008032	11	35.5119769861654	2.1281134659686	0.302593374046192	1.56746386636415	3.1079578187399	0.544074878356992	5.13352219402153	16.7822510307579	6.49813068372555	6.84532912278437	4.12460913292876	0.868373447126049	2.57644071395361	7.53988795520561	0.0664602012171198	0.124299789992809	1.28789230665159	6.35312237435817	10.2986862577949
2008032	12	34.5612166545891	2.14846387707093	0.242444940139987	1.79273620930141	4.79026059518992	0.765567323307609	6.80407803641514	18.9111653129602	4.98240384350213	11.1857034329022	4.08147032547462	0.792549785731242	1.23049895725913	8.33665267551202	0.0615987662477897	0.0918673524691766	1.62079935990699	4.57845237134736	10.0427367513973
2008032	13	33.2028465763976	2.65059882649752	0.258828413784971	1.50474817693404	6.39299532130903	0.781966280426651	5.95770857708569	19.9659860338529	11.0556127591238	8.4554607435946	3.96495018573361	0.742285572351828	1.03180792593126	7.01020368032579	0.0598211829383115	0.0721226274918753	1.41763130127827	4.21136429429627	9.43396609838664
2008032	14	32.5713999980479	3.40115657132328	0.666845797399661	1.3868376299949	7.71788178396121	0.871140540529839	7.77322541896112	19.9195627736942	14.8103694990276	5.22464739577141	3.95164963808395	0.745883637606227	1.24913103870923	5.71640797195889	0.0580920471220236	0.0621740656674698	1.37627024237566	5.92838668197575	8.61783505826062
2008032	15	29.8818076614266	3.16917057411481	0.861750590594727	1.79569847484407	7.90185255384262	1.02457062384934	7.57924939524876	18.5725804632064	17.0146320997264	3.08487373367652	3.48828675431796	0.760204750222985	1.64872198301442	4.43206031817066	0.0538748925515172	0.0573787919006676	1.461676824487	6.60094283732819	7.47672092986802
2008032	16	23.6395607673741	2.60972005586547	0.950628733911213	1.89190326375824	6.88944337330673	1.03787682040601	4.78980976583389	15.7365458220642	17.8480460129942	4.76028904880475	3.19472985905245	0.723232828991876	2.13158151231979	3.16428679441288	0.0613809234484017	0.0468440908493854	1.44605548542476	6.55495886356052	6.07524916122772
2008032	17	16.3073202924745	1.96508949962015	1.36228107167168	1.60067949898725	5.95260394411719	0.943274123048959	4.48429701749742	12.6761356999801	16.4833101999101	4.99980931693408	3.27409478949002	0.666556412270403	2.69282059232896	2.40880436597944	0.0569331115400914	0.0481233516694061	1.73062589886802	5.49935087239393	10.8521785010814
2008032	18	16.3502357409821	2.26183873385592	0.965991332573839	1.53406709368709	4.94341618154824	0.879985965970552	4.75230434034877	11.5448550491798	12.5173801192715	4.63115628717237	3.50632896216645	0.611732553805309	2.31435458312678	1.87207378893259	0.05376362899506	0.0505557004944065	1.9756914229838	5.46123218716551	9.69909358045554
2008032	19	14.3857302303116	2.61683390538027	0.61313510585735	1.50174161419384	4.49823479242549	0.902447543169733	3.72801474831172	9.43895306152759	9.95796398579983	8.83060592655137	3.67308718194835	0.546203547107312	1.92923420280865	1.36308711403256	0.05101167272915	0.053472120412074	1.82938843337893	7.14788252494446	21.3548072382552
2008032	20	5.46406665406018	2.75684927797253	0.296088785525328	1.46735999132573	4.41134421993745	0.828241757647904	4.22186130121801	9.48193177833859	8.63205980159304	12.7276817406363	4.87085971194896	0.481508415979676	1.6817167400604	1.03904620837687	0.0509637233010472	0.0494985307868192	1.93881346939217	6.68891722434833	18.383859069457
2008032	21	14.370846607454	2.36843040053753	0.0822795618293198	1.68987257252308	4.25210687310212	0.752361131978096	9.02388175312579	9.01581680172886	7.16545441970168	11.1503396710162	3.91534302427303	0.445018703777176	1.44443162102451	0.701880522736737	0.0521439757386812	0.0580381902863922	1.79023124853717	6.28495380277563	17.2788010777797
2008032	22	7.63536535686901	3.48608084403795	0.101337731374799	1.85099689008867	3.844349253841	0.718675516292969	8.0391212132537	8.55961341606769	7.14853711640206	16.6284535833759	5.65237872203117	0.438319415354643	1.46583277037554	0.533311184553024	0.0610034457053257	0.122582824622186	1.59859257497445	6.30465746895318	17.9755058195889
2008032	23	21.5153949004198	4.4276373921376	0.349260448417052	1.70660562501201	4.19772663710192	0.788843580532062	10.9783599933528	6.3108693745674	7.72846559288636	25.839514769374	8.01103095558086	0.456278542637022	2.16280198679577	0.523887169581918	0.0711229331729949	0.139456341749481	1.51063813475922	5.26882311920262	17.8284095760881
2008033	0	32.1763267061823	3.86257956850581	0.48826309149112	1.93720874875291	4.44666254331002	0.888485220599569	17.8164144112893	5.86994362008002	6.85901626507199	27.3487361430361	7.63401864049875	0.531862795247437	2.44965654254289	0.585138167160568	0.0752764855467057	0.0722168904704686	1.4091933633254	6.02409962956271	15.7808053258681
2008033	1	25.0853962091684	3.06000486165303	0.612968830528387	2.56310405489937	4.14068610793661	0.996466794845531	21.4269720028996	5.62685607260345	10.6718499304497	23.5059941153954	8.10721826721771	0.625768181348409	3.11369512552591	0.60587484164264	0.0705706353370927	0.0476946376755513	1.27854707862555	6.23958801409668	13.7041081781559
2008033	2	21.5844667472767	9.38613988805159	0.632702705499039	2.47852483593452	3.39403774629822	2.05608062446888	19.6652083627532	21.8333467010023	13.5645156735843	17.2701098976777	7.6605245951142	0.740538677168674	4.42397973673403	0.844416480283597	0.0631371605853853	0.366693606499133	1.68352966203557	6.53148579733488	10.6896146387565
2008033	3	19.5434241080823	7.44334510575597	0.582211258615231	1.99339640900834	3.75910805429935	2.35892659745318	16.0065182533842	19.4137106054259	15.3208509657566	12.2863988324019	7.64964266488474	0.80632628794459	4.95262845039587	1.84246605382858	0.0595096114503031	0.489498060247697	2.15707476062462	6.24404409768611	9.38500021147905
2008033	4	10.5767620178747	4.57919645963148	0.926109796543464	2.47265087370531	16.2627266042514	3.24912569894761	12.4074115321613	15.9523225578904	15.5433637365283	9.00298800519371	7.04785412202483	0.904126968004874	4.05108848120562	3.50387495439384	0.0588654009401474	0.677305603632343	2.07663135494402	6.70930743516245	8.08610311710102
2008033	5	5.60936549654855	4.10264177838521	1.36515803853944	3.44255569105326	15.0755978625301	4.6953860636982	8.88455308876886	13.2273610658502	13.6500964815643	9.53789217473728	6.26007412409048	1.15288822929145	3.3579924819963	3.12439493203418	0.0524598959847039	0.88218494865042	2.06934677221526	8.02881974044075	6.52367887325101
2008033	6	12.2930142928587	4.14835459032783	1.69003420576652	7.2567753679222	12.7423461915578	4.40476966384375	10.0731953849454	9.16136528935208	11.4511235011838	9.63881039420806	5.89234215201763	1.22334298240834	3.39762001021048	2.49373206624591	0.0502025700676423	2.04405234591975	2.33316752386582	8.8637619169009	5.91470200654646
2008033	7	19.4158249002545	7.89076418095029	1.59477927267295	8.8728282268468	10.1110065842742	4.16841055941576	8.31152047124155	6.62792112406098	9.91119209880199	10.9665770751618	5.84977768116227	1.30009855299044	4.66719420053175	1.93215007348944	0.0486682071474307	1.58079967719101	2.30943437020697	8.80349829632181	5.58282157116152
2008033	8	14.825416788159	10.6577543742619	1.43393090730978	8.64643879458965	7.73840555571106	6.45739408030287	9.28589558437716	3.84095162543434	8.98850390980158	16.700184819076	5.64005806700807	1.49370705914865	4.69595536919521	1.25322383346641	0.0559582596575675	1.90810463093501	7.63793967418722	8.35099187129055	5.1997671046247
2008033	9	13.6015882845204	9.55357932647191	1.59321538678694	6.6537113683944	5.03939842587262	7.05586978205438	13.9850113785	5.58790837190144	11.2390536113785	13.2672536943331	4.73023916393569	1.65118767014649	3.98671720212286	0.838003854799022	0.13098619297324	3.30887040612924	12.6853029847865	7.85068558412607	5.39118610878905
2008033	10	12.8325017956762	7.4454811056855	1.99884736224439	3.03320704923176	2.32142728730856	6.48723222842976	11.859447391075	6.92759208932169	13.9656305262349	11.2188054727768	4.00894763600304	1.92455396351808	4.12258322869967	0.962874084605485	0.233281188541892	2.7793991098312	9.73118910100353	9.064430435704	5.38064260356412
2008033	11	14.901536963595	5.6419412987046	2.04577577849503	4.29268768406529	5.89093094779838	6.04950336144063	9.43187958494433	11.2002272213234	14.0436066970105	9.23929458707013	3.37752255300199	2.0709186922745	4.2189397425982	1.20830351424131	0.272483997798151	2.5176555599077	7.20753784877898	11.5075323895934	5.08213110712034
2008033	12	13.0947350219706	5.05159888642562	2.70176206417522	6.95506037469447	5.69335292365248	5.25617165560535	8.37600087484128	10.0263900298465	12.8724932130538	7.15796993378605	2.77340895155605	1.93352211895419	5.01675135472804	1.26533111002694	0.39169618130332	3.63460543979534	6.46509774315779	11.2568841471686	4.56154953356639
2008033	13	10.7917131725076	5.13588077563966	4.12320099797007	4.73050818365147	9.61369337126965	2.83799881961726	6.9850782631759	9.48242701211422	11.8237106828747	7.63320046633457	2.20118518031806	1.92132868605531	3.76290157960674	1.52611841740337	1.02969608768878	3.20871590860992	5.77576694673544	9.89488589927633	4.44937717141245
2008033	14	8.28387965576382	4.69837352590183	3.97353448117262	2.59850575269739	8.57765332383298	2.99367060398791	6.05144661625476	8.66859588306683	8.2425237415299	8.52289158606969	1.6957642606145	1.96769374478591	3.03721949986808	1.46188089813579	1.56384178842024	3.23502300349179	3.6478007274135	7.97851235736295	4.63328753868683
2008033	15	8.1181097920501	4.289699485324	3.15405238923029	2.54949394632018	8.17625171711843	3.10645731463996	6.77575850051306	6.70687957375826	7.32722110716086	8.6344250535585	1.71670815359567	2.09492975323636	2.70116854305689	1.57349758040279	1.48263304366202	2.69710378686452	2.93909253087163	7.19781032858637	4.22854052883955
2008033	16	8.9061945623342	2.96665830403908	2.47295751254208	5.00327615837912	7.38735235139186	1.86379030795201	7.03819604492789	6.49049367263122	7.84180425133711	8.30713977116509	1.53377984899057	2.10097833308136	2.18754389903117	1.34887072388899	1.24255165039758	2.04408380007167	7.29593182677076	7.7920803408245	2.95510507753553
2008033	17	7.36203587561775	2.17916388425851	1.80152095181936	4.68223648028299	5.46448687352715	1.19019567562598	6.49106324113235	6.51560999428201	10.1605810466258	6.69887096400241	1.34218103967359	2.38424670428916	1.86351318751631	1.16658706827142	1.13109375088741	1.24529577545601	8.04886868616289	7.19004165994083	2.08535068275606
2008033	18	5.3806405420201	1.8779376520007	1.41085838735479	3.35550453206526	5.60775765625242	1.35135691739204	5.26335452596321	6.22512888337973	9.27235339838507	6.59895529501539	1.54382134786092	2.80070274745402	1.9758946225804	1.33764895925278	1.02597810165068	1.24922673095319	7.6444224034155	6.24183743998364	1.67464755877715
2008033	19	5.44970863473204	2.16273488765322	1.04556042637333	2.03503520526884	5.97405948838587	1.65554512613663	5.23539917451124	7.05272424731985	7.18730785777115	5.99329118127959	1.90162235728994	2.25850839416049	1.97603353245824	1.30671222762913	1.18015608845222	1.13703177699945	6.92180931978362	5.87189048651093	1.56073383162825
2008033	20	7.17578964663543	1.93367778659447	0.822467414473032	1.5042450890785	5.4444294409571	1.53634261586526	5.11497501472708	6.79497184278718	6.68120479807676	5.65403314308585	2.41703689123898	2.30667157424476	1.6359519784022	1.24720469673216	1.52626938203575	0.881278181626531	6.07831071166092	5.9608770449158	1.260569904337
2008033	21	6.79077537172796	1.08464557790419	0.724596269147399	1.51499713409041	5.38530720685891	1.3364785292137	4.72436009577337	5.97180353231543	6.01657654405473	5.20619378455797	1.91862681563011	2.78718072843015	1.23034236461295	1.80921654222853	1.36788700773377	0.627035245962801	5.48931330443396	5.6441442305584	1.06915160855866
2008033	22	5.35237024623257	0.787591779085544	0.681483344447182	1.14477625439931	5.6999995326659	0.961941786072889	4.4333147257634	3.59422420407423	5.75673183917445	4.27897111197017	1.2431157807553	2.57125751988768	1.03292710227829	1.75526234824967	1.6698088181402	0.506545995592924	5.47658555179249	5.11751515848571	1.15367693007404
2008033	23	4.85681129761732	0.78807124219488	0.658549803401013	0.90099144936443	4.24098770805768	0.709421659749468	3.64422416566635	2.87899105974638	6.4808605817981	3.61697513215601	1.1301824687062	2.19161251759525	1.59916818662143	1.41535807854649	1.11525566677333	0.440070115387477	5.79548238107207	4.90175022257717	1.25105432587604
2008034	0	4.29450958068945	0.823664748680448	0.676254294150792	0.878238634817676	2.93534274037468	0.614718398387283	2.65656140406601	4.01027226703236	6.0218738546274	3.49610805160281	1.35502741455681	2.26985528935435	1.69303661747345	1.26785112322769	1.22036628840415	0.41666447291714	5.76478870689461	2.54992534182299	1.1237282686904
2008034	1	4.51724238297145	0.781109518510693	0.674513028470631	0.732525196464284	2.57144896110584	0.579071248553635	2.17191710626987	3.50531161659473	5.62248034858687	3.82291150378063	1.78158164633479	2.29178471917774	1.76595579854786	1.36954468517041	1.57661760707135	0.405686958465813	4.77926694765962	5.08877849433097	0.958890925114574
2008034	2	4.76537150644079	0.77344982635661	0.715681897008826	0.624709100037468	2.26118722665674	0.53310168093466	2.27668861718735	2.67552985894688	4.23812280369282	3.71920652582715	1.40662398531139	1.87397566329986	1.57200813265344	1.35203409490516	1.45856565343785	0.412400251985022	4.02753036248952	5.75470240662237	0.867721913580601
2008034	3	4.44923024073168	0.792899636258874	0.633069565171863	0.604391278317893	1.97258259768482	0.480915575985131	2.2594941435424	2.35535092295918	3.59119850807002	3.98824917119083	1.98037384465592	1.36687839513499	0.948599143589435	0.815205396180707	1.38350187239903	0.473006363813575	4.51390851269812	3.77714864336971	0.852018728497276
2008034	4	4.50549492823473	0.736229672995987	0.590953398366978	0.585796357191309	1.56680349652218	0.451402050254985	1.99989681159517	2.2289113000513	3.54002021066357	5.23254093719454	2.94113846495599	0.820121083932551	0.81551256777067	0.402648919747732	1.52270906636464	0.50476365026843	3.47983612560031	4.32131019930423	0.766059151781524
2008034	5	5.05072358424607	0.692004475590994	0.55919291196552	0.572438262865635	1.39612466831123	0.44304600716908	2.06719435987802	1.61977235046334	3.57855163595509	5.80371611984792	3.23216977301402	0.632458002568883	0.575561321903871	0.324791552896094	1.64146477317334	0.371486003455333	2.95977953301138	4.4851480025648	0.649491183570411
2008034	6	5.42657306578086	0.687398528989388	0.535719336164696	0.576337901521385	1.4108018346511	0.450138233008247	2.67591168286926	1.52513999509583	4.12518428096753	6.14189286330032	3.15954931145617	0.731381259192407	0.750018203077671	0.316020984491812	0.826967906483746	0.345394692938496	2.68258096394739	4.77869614732985	0.550388528113842
2008034	7	5.39048800865192	0.641254034720957	0.522244126493342	0.568896935118179	1.18920675931489	0.476311968750056	3.12794464815228	1.36060351276276	4.494003176973	6.07495437954946	3.03669150357556	1.19954989880471	0.735704334686992	0.324817681677217	0.423493022034562	0.33452497721252	2.43501779292831	5.55197696100645	0.526685010749027
2008034	8	5.1198979802712	0.566870930062028	0.565221635766492	0.554201429798608	0.916091782330992	0.482659515448383	3.20704758673308	1.46270599218092	4.27652649114742	5.28789759930873	3.4754384111843	1.78377840751169	0.693685734224073	0.342545449391081	0.373175232967589	0.373242155309657	1.81249092710661	5.76819223173555	0.559589710629942
2008034	9	5.05931568912898	0.772536209578949	0.544636073271996	0.574086353254393	1.21186338287613	0.530526280951409	3.13090796115109	1.67278676750744	4.44953269148734	4.82663294978399	3.56115648978506	1.57274958839883	0.693478137692442	0.34003763968769	0.475759293632119	0.4818182413862	1.07799594501608	5.91411232058298	0.591518723321073
2008034	10	5.09264425794161	1.10030129754684	0.515636495322061	0.812545972567514	1.49660082109836	0.531659281431697	3.25552876310319	2.04278308117415	4.80886292670534	5.03737298871492	3.69901781262812	1.24103993166027	0.879725863746597	0.347407724366276	0.534455866329633	0.587517325407005	0.895934365171425	5.8881969989304	0.668812924813084
2008034	11	4.45649828199304	0.894060958600902	0.488607311203088	0.810918666741592	1.69503566470184	0.422433274069299	3.18705457921019	2.34451330528583	4.53042498994488	5.73299916335518	3.95803743222068	1.58597367717498	1.69442497997581	0.352000097889156	0.663296716645662	0.613533476739945	0.86578175928855	5.52216336972606	0.755245421186999
2008034	12	3.8055484036677	0.783794426297046	0.49593457964962	0.832461387817136	2.09140244677988	0.368147934551478	2.90466927561165	2.21502628314671	4.39145036149296	5.42006080326478	3.8555197453855	1.60205111341921	4.27858935530526	0.35843037040314	0.731693637439235	0.863614395800199	1.28153029532978	4.9635836456205	0.808420304971276
2008034	13	3.64154818057815	0.505375855611074	0.441255074841193	0.689943691604817	1.88346354173403	0.53296750313767	2.24790571519728	2.45422240991201	3.86423366837611	4.33328476407336	3.20589331831822	1.00579798176215	5.99033009991954	0.340259353613071	0.781326018128462	1.04464130742205	1.7589472841969	4.66782875848265	0.796050253995927
2008034	14	3.93495248473105	0.443008537918471	0.429501420877434	0.487235984378863	1.55103829466924	0.911539583423369	1.67400857781591	2.7431630649452	3.48092652406748	3.28258827517154	3.17011368457955	0.794009981104656	4.53822092558284	0.944958324140854	0.840409101305134	1.12154253960506	1.61939357140991	4.46374422621762	0.726663906107545
2008034	15	3.60585645456965	0.504567647299236	0.397169371169286	0.440786440056887	1.18941998921097	0.952383574902797	1.36164089501867	2.79176770282216	3.12987317024225	2.46886215996624	3.34297896615875	0.757878243430913	4.43200889596271	0.728105095906559	0.744197186044497	1.40390658929404	1.29010075777283	3.7651932286867	0.510450824416626
2008034	16	2.89141150173956	0.548682666495279	0.372570682538482	0.426587797620192	0.711157984667334	0.773864599089815	1.47278657644591	1.99097098987141	3.16599791995441	2.05007261614984	3.53328268570945	0.946599150078139	5.25868222501815	0.603530449100164	0.582767000126885	1.49392267449259	1.00034844242755	3.35904033199028	0.412059040285353
2008034	17	1.81935582609205	0.348548815390097	0.351516448324661	0.36520367315995	0.452873930591829	0.694759737999305	1.8951867869269	1.01285285898821	3.45263562115248	1.64132185238887	3.14537085661238	0.867531850337072	4.83969961279984	0.548386123024149	0.514153197915099	1.41133212713372	0.790905333861984	3.2229722944002	0.372455055876509
2008034	18	1.45704587364681	0.478975385099326	0.337220398921227	0.318818215997416	0.394202614986129	0.694153683449178	1.88764801210372	0.74673979160761	3.31590987076902	1.40088970461627	2.66663904347006	0.847028577763964	4.08282710740055	0.519124289380857	0.461164539486589	1.15585693491546	0.568310110131554	3.60141775408016	0.318412529088144
2008034	19	2.04449613547635	0.450902722568998	0.327013360683673	0.304931783847248	0.406138017307041	0.550086496107479	1.66147660286739	0.92561187324875	3.15419187395396	1.02487628808688	1.9284061137184	0.864034613504053	3.70577278732049	0.505753973080444	0.44199949940071	0.693856411615978	0.425995828546084	3.86337562555395	0.27466577424738
2008034	20	2.50769614254916	0.416089698634633	0.325366358065295	0.315427935524389	0.364625474493137	0.536418874345356	0.93359005060744	1.43172207912022	3.32530948880069	0.493188765619021	1.2885962811982	0.867497094171848	3.11235529212825	0.503194875403039	0.355571010135799	0.597239061004731	0.485327695626232	3.7810665948982	0.241443587896586
2008034	21	2.20170005244873	0.382984644392894	0.332071869027229	0.330990996150434	0.388304694746036	0.521608689792317	0.694362141781825	1.53222440084942	2.08170548559074	0.365793750057451	1.25431544697503	0.867910734700895	2.1315448719307	0.50122911903174	0.302839121857257	0.544281758344617	0.791828023609212	4.03804384283128	0.162985931117168
2008034	22	2.55066103389241	0.365064905519475	0.346478544423496	0.378388964616175	0.508383848948649	0.493097348529316	0.773713986619165	1.17072382290894	1.77850547854078	1.08657449769186	1.79369639424578	1.2393099922526	2.13387607136348	0.497802509625178	0.323185229482285	0.470950021416772	0.786975488021961	3.11476039015439	0.12133577955673
2008034	23	2.96393193409559	0.352826350151679	0.342807068076638	0.419192864577427	0.721427051376405	0.486609062682947	1.25711688972516	1.1028752755166	1.90890973503695	1.54363039289798	2.8911050286102	1.80317165347665	2.22867089331941	0.502966526577156	0.361873350784512	0.4137937157124	0.541097670805121	1.88154198687907	0.126263056987732
2008035	0	3.29698699623659	0.351891376971261	0.330596041275749	0.465846170523428	0.778210481878102	0.478550101048587	1.49912233563953	1.08301143370079	2.68197856846398	0.903959072110107	3.51490434867155	1.95800994088315	1.963767844456	0.53439650045383	0.415034495930584	0.371028437285762	0.780255214419787	1.82982554994942	0.122645380644723
2008035	1	3.37828265995156	0.351625295066743	0.314796241601899	0.504867269418897	0.793534466028906	0.459486798579502	1.3142672887621	1.09263470894717	3.03205799165165	0.425474762988581	3.43698527743615	1.89252899426965	1.74560095230572	0.662230132218599	0.518680325128231	0.333629132616908	0.886295999876557	2.23719714594397	0.108602703188219
2008035	2	3.23242551344585	0.351714509800636	0.291549876954351	0.520635292505229	0.703899762341823	0.439268937106967	0.856451714006459	1.10381512140303	3.05385123757869	0.391900017028279	2.41589127969597	1.91122015246713	1.89918779465062	0.728797523732606	0.593270219205828	0.316603466610673	1.18967694551376	2.42220803568314	0.096279910057542
2008035	3	3.11068360083746	0.353483505963313	0.267406031671706	0.508551799816313	0.673514400473402	0.422918255137604	0.747108748150681	1.0237893027479	3.0406654581324	0.417628280399127	2.10006346836247	1.51404922817173	2.17048626353695	0.670073384565365	0.598152187793717	0.318005452219532	1.36307696562556	2.73788021215903	0.093252340075749
2008035	4	2.98593020743399	0.358719017539504	0.252713448486432	0.480662262884561	0.63257392447554	0.410076139518549	0.716099576589019	1.00775559472949	3.10172730291728	0.407401435014129	2.61494800838512	0.99622813209	2.4049780097428	0.596748083558812	0.610701615059675	0.310299225534527	1.25935079539103	3.11079294166523	0.0874125408994281
2008035	5	2.85839386188864	0.376674605935393	0.238827564004096	0.450601898131755	0.61178572651337	0.400607026715337	0.65628016378392	0.978030532724891	3.06656372739209	0.391835527552033	2.5304710350333	0.952712991360146	2.44613366297607	0.494108886035319	0.451004929732401	0.275621924620642	0.990693270670668	3.28495182398704	0.0802984570109179
2008035	6	2.87565240551178	0.427580284151115	0.205965433380877	0.421698716421215	0.583826176819975	0.39935610457467	0.587556034027105	0.981275186907627	2.81888768769973	0.446516074264736	2.58365111255802	1.58995372524748	2.24242065510022	0.448075591643678	0.426124124692131	0.231134932305575	0.75905705387765	3.20033883545029	0.0603040175034334
2008035	7	2.83230656344694	0.443231247059012	0.179874082601041	0.392247877822814	0.533223074167244	0.401562143350996	0.576831619114695	0.982859425882411	2.83659147015579	0.451141496778335	2.63947734258228	1.7620530915391	1.9342602786753	0.380457482752563	0.440304974648633	0.189558623874328	0.65283547063808	2.69274052837881	0.040278976693428
2008035	8	2.79742962490157	0.485074969288429	0.161867282255008	0.364603976761672	0.517265354893268	0.40125797024858	0.606248775030032	1.07242672989218	3.08044741463038	0.392485842145122	2.1856513789782	1.76428473661947	1.77080278084508	0.369681292557496	0.387304171048674	0.163190400497549	0.545436118433173	2.44760964187451	0.0381684705663675
2008035	9	2.68293505983418	0.483512064356812	0.14071963493738	0.35733916060506	0.49346696898836	0.424309780047097	0.611720067417151	1.17314186754212	3.03366979025748	0.39234221943188	1.76950902118593	1.54643039538979	1.69129250999786	0.378022859507781	0.320493786325782	0.146744408480408	0.42053336702074	2.32997758433629	0.0411795706158217
2008035	10	2.43287980889525	0.449068355548549	0.139564821736497	0.36776006450843	0.458473663325907	0.416939146112128	0.620441888658189	1.20549853866039	2.85056698612712	0.412495498012866	1.9624302333415	1.43054593866519	1.6941332923098	0.382258709942817	0.273730039197389	0.134590099529103	0.320183093948154	2.07384056989052	0.0471611087759546
2008035	11	2.06094945396523	0.400429029233933	0.323908708456364	0.359843908504218	0.415983835166159	0.387516190389094	0.641910226701685	1.13328820052314	2.63494010772914	0.364185280607143	2.43338793392216	1.38722924401155	1.83706923184953	0.365388672802914	0.234181905774488	0.124217812042837	0.25321503331499	1.78832415791857	0.0562906574765656
2008035	12	1.76972233110046	0.369269817412338	0.441427483695397	0.349803154046167	0.387525064557484	0.341488890379554	0.663284824084842	0.933827478260789	2.45771559843174	0.381800542746778	2.69211604667265	1.24749229339333	1.89965333476756	0.337596447522773	0.216820911497127	0.106729306233079	0.216739404140549	1.54010086123849	0.214322174666338
2008035	13	1.78623186332093	0.34089697428359	0.393388003098033	0.331709353998313	0.369308026547023	0.295442174128122	0.668488926165925	0.802382421105347	2.35253308803263	0.401582156978664	2.52246864548523	1.14688068948895	1.89689562751347	0.334378224232903	0.206977918976161	0.0927727472264812	0.197410841051376	1.26896906245584	0.586924138949283
2008035	14	1.87881200008114	0.306840815972642	0.307266023260458	0.311288590259669	0.34513863712976	0.276592104342459	0.60994201458621	0.731702968677248	2.21318806499557	0.359106530377801	2.26783566997863	1.18168781779415	2.03540012626602	0.327888477586001	0.195474380399969	0.0827890824812617	0.17646177031964	1.08315370970605	0.562361863311567
2008035	15	1.90176817716456	0.283541975038638	0.264963438775485	0.296398891732362	0.337730422112458	0.289983979634084	0.572718422599473	0.661408282391076	2.07967343212723	0.353979179940397	1.93958123542899	1.14109151811582	2.16683792198787	0.327969693823764	0.192497524212711	0.0770840001670156	0.163177805842181	0.967800675852264	0.961358950761025
2008035	16	2.11617410587205	0.227954054685555	0.244709755071409	0.284475770051792	0.3399677247178	0.326817349249248	0.575305782738782	0.593107277439559	1.91694298061317	0.333998261222836	1.38873707095352	0.970757807143612	2.39355051989901	0.331097086032179	0.192020218965532	0.0715632035789684	0.160225139427856	0.965373583629461	1.15634138765208
2008035	17	2.51263468051522	0.114576492919388	0.166930881597064	0.270004643585663	0.35017023279631	0.32201254906509	0.588176969553049	0.51790882916628	1.7234058826725	0.344470332933783	1.34185349574178	0.816435062906546	2.68820600809486	0.334840124527544	0.198225563009822	0.053873091757963	0.170794078301101	0.985663547388382	0.925612078001872
2008035	18	2.61510547063383	0.126325983406093	0.200615243641258	0.260422450238351	0.350884018329176	0.180863070832761	0.549907958569192	0.393747228675467	1.65872786253667	0.510019318437055	1.50188885334786	0.665378698730389	2.74862803075764	0.344655465764909	0.191307031498534	0.0371865282014466	0.170327582523631	0.990741975302331	0.730598880591421
2008035	19	2.51336202992085	0.141952033517841	0.206230973466699	0.257717367435546	0.349601464798014	0.276188135408707	0.4046582261812	0.262566066815901	1.64682684034658	1.0133340048593	1.59700857734716	0.734270217320808	2.55330975850503	0.352544965768672	0.20105863184616	0.0444481713958241	0.155472232135883	1.05933922846312	0.65542094699266
2008035	20	3.24745228491686	0.159337820531904	0.195936441551444	0.317182987919234	0.363787703068582	0.235375481084588	0.272438610902073	0.365656872170111	1.6688247792062	1.17757905610265	1.58993281944678	0.712461096452363	2.12942640073882	0.355379919695173	0.220013712371143	0.061250534900092	0.138205268847333	1.16332662470724	0.573004149487224
2008035	21	3.90415984935941	0.142637327949488	0.188329367607687	0.204515919911374	0.358403233146562	0.18868355667805	0.394999636744847	0.692006438058033	1.69853491161918	0.562215594003486	1.49484293981812	0.650072305690277	1.72743220877702	0.353253617140572	0.207531703601836	0.0793538516565517	0.126690243587959	1.32711055842248	0.403514353206506
2008035	22	3.84914032142602	0.139333300686113	0.186709434958572	0.114638187301784	0.223622529021833	0.157534562054905	0.691381959809258	1.41125396555215	1.57799647908242	0.842298904717431	1.49801793963115	0.715207046380725	1.48930181191077	0.345387547445208	0.174802986114036	0.0975888516777802	0.118855987433036	1.66410787289	0.733796455105074
2008035	23	2.92309501407545	0.140109579141308	0.192739719762867	0.122108320519074	0.296561629337373	0.124943549921134	0.474396197274669	2.08500661567309	1.4471644974869	1.32441548481208	1.51880785650914	0.736874775818245	1.28889681656834	0.334562802120873	0.108119247534704	0.145987741568756	0.115524292632114	1.98946546967211	0.808944650734406
2008036	0	2.90189688501958	0.158438272787414	0.172377300299761	0.117838586206428	0.470719921147033	0.117726115183971	0.52589280293818	1.69203356457227	1.73401851839906	2.24874436580374	1.51563910846642	0.660458890390305	0.966286798458209	0.324152730619001	0.0610157572628787	0.261274657769981	0.114005336087732	2.02826120931917	0.543060116438358
2008036	1	2.9190850102469	0.20964648081037	0.413014616338469	0.127842619808082	0.657910004690013	0.12441781142837	0.764269192757974	1.51605766609987	1.51337947133138	2.65518041910869	1.56180957326195	0.565444101750377	0.496022200098053	0.314639353400902	0.0437615388995223	0.316098954783777	0.120017901248389	1.74001550986878	0.31611474394336
2008036	2	2.94544214708107	0.207585021817129	0.589336201788598	0.152098888428746	0.616386400849806	0.136623576279164	0.863020209870493	1.50647460939383	2.25722541110653	2.63396565456552	1.69873154897292	0.549985662207438	0.474512241985039	0.306282223102371	0.0386574126844382	0.277482118985447	0.152868731587467	1.50263845431452	0.243692309290456
2008036	3	3.70119513339909	0.245513430525951	0.329064805700796	0.173080773838221	0.744936102230803	0.209693066553113	0.763932843968534	1.28734401970451	2.71531731645212	2.27136318662682	1.87769760882848	0.538166875991264	0.706042509252264	0.298383069366769	0.0379551562731708	0.225422907402983	0.210055190247071	2.33087718834776	0.28325131708814
2008036	4	4.58807916179514	0.331163791926904	0.357540123389624	0.182614624018538	0.809127289431582	0.301187169397252	0.640074428819053	1.18996499319724	2.80834790446899	2.11708184995364	1.97363502527017	0.514857983631368	0.88703264958111	0.290643685188158	0.0393734697740756	0.200758801680414	0.26597526152961	2.81572224207936	0.316276497617348
2008036	5	4.45764228267375	0.334003824093635	0.295701229572592	0.216000483398379	0.67973975735915	0.278071039662827	0.636771323740691	1.14727074479366	2.62247539462494	1.74715961623276	1.9730510873676	0.473102576447838	0.798846299154566	0.281059685876827	0.0421725827125442	0.252228622770145	0.330674562012488	2.64221483178082	0.48328959147869
2008036	6	4.04378800528232	0.255427835479451	0.229959706885343	0.354298662385665	0.548842626916031	0.297458553247315	0.611075334152919	0.860369900040635	2.71349150555745	1.02524510391306	1.77315506941295	0.442731939122318	0.910058686284443	0.269400465737874	0.0443488882888797	0.265608624325448	0.324813640122363	2.45520763298885	0.757062484297168
2008036	7	3.69317441002096	0.2347382758612	0.237422147346927	0.261393543835335	0.438796093313114	0.277830672905914	0.74269112974126	0.915432184776513	2.844167830552	1.24300977822077	1.38103605903013	0.419246710933456	1.71552153533886	0.258401825483413	0.0465667397507617	0.254576319077047	0.539715084821868	2.36806896445553	0.729927238994109
2008036	8	3.65878593588433	0.281742465021249	0.290293356885038	0.228585131653966	0.33233512406723	0.274615879905943	0.914629641279617	0.825609858344889	2.74754847366675	1.07735655415395	1.322564116589	0.405759757439362	1.2450029655723	0.249768118441977	0.0554269137920157	0.324482509147849	0.992575356744198	2.4701539146966	0.58588541502343
2008036	9	4.01171668152441	0.336784030616053	0.3853929150191	0.197942020752891	0.249117951120061	0.244130385295597	1.28859759053513	0.550829074525131	2.70812331425938	1.29335730476568	1.25300332881822	0.398196392351433	1.19541362544622	0.244538158049309	0.134111125358266	0.280653142112144	1.25844063228938	2.48791771059629	0.171472341877598
2008036	10	5.03298552110502	0.324503498529558	0.471690131854215	0.177064537256044	0.210273751142808	0.281272457539512	0.581040300270964	0.601228161751998	2.61924263113908	1.42393325410948	1.19692969779305	0.384733499822823	2.46400319965475	0.245276573528175	0.169465451541701	0.276952042526408	1.36382142027862	3.02159970913706	0.128188795880416
2008036	11	4.12005692450061	0.300084795097443	0.614456317481237	0.188006771375091	0.20669554889679	0.3610014705389	0.387944710217566	0.644181872762451	2.40295758457193	1.58031646160185	1.01370425519477	0.361301143186176	2.56940897066606	0.537118658071461	0.173893278228696	0.272332349562461	1.21749508791215	3.42420054309154	0.237497865684085
2008036	12	2.68877372644557	0.434201841095947	0.461606282276819	0.250093152449866	0.181012495588281	0.295626026128955	0.31663771363139	0.790005430092653	2.19457450717034	1.36868819578567	0.937603565920469	0.339038328296648	2.71751045442332	0.759756750099887	0.157151193660313	0.263109324411874	0.811491515397458	3.40160785885855	0.589564174665496
2008036	13	2.91245261454474	0.655933345409875	0.372785314186508	0.233972367586117	0.202565914308376	0.254426955585826	0.58493237760612	1.0442001764247	2.10140606189511	1.1674744156217	0.822662546103716	0.331594549609204	2.65304923265071	0.776864317430403	0.152087208203316	0.234217049647301	0.545333504082749	3.06598128308081	2.23515634698244
2008036	14	6.18789097172726	0.807982017497298	0.271387361374167	0.20414835274038	0.288569385123617	0.234665297421583	0.747496239668139	1.17399442590539	2.30922273245349	0.752173380054853	0.575155007025473	0.331686498881205	2.29142724691483	0.687964052688324	0.248985941046047	0.185051827074565	0.411175363129074	2.64023147104281	2.32166747628427
2008036	15	7.65055683027482	0.518386820608066	0.37062256545272	0.202946141962164	0.309715872274869	0.228835124603801	0.329095788340091	1.15280123967818	2.57111413037146	0.615254138390149	0.444498495890759	0.334862433458374	2.07252045508256	0.606887995823629	0.319695839732208	0.159525283656401	0.338863175197197	2.36138854158971	1.92052462262064
2008036	16	6.91016787165461	0.361141819512686	0.443915450829451	0.247875961694471	0.427126604984647	0.24950756229483	0.176466636508112	0.733033655774363	2.59646439178047	1.24896347472101	0.445995737712856	0.335785398791381	1.71754753313969	0.740076772931422	0.314804634138573	0.143504318688014	0.286237604617423	2.53286422722292	2.86125234806727
2008036	17	7.67314398648692	0.222033597385901	0.422635501439471	0.256019709525307	0.531182239944094	0.299744150718996	0.206621544348052	0.692043999098198	2.76559978490689	0.900819595562776	0.418639473216048	0.339068130863777	1.87335121308325	0.607529422275367	0.288028020926337	0.124184090573204	0.219357341929425	2.29798021621644	2.51309141604517
2008036	18	7.57641916407107	0.119708439784096	0.371692059595892	0.286648335773001	0.366443772049458	0.238151374908205	0.531917592104139	0.903931896739172	2.82175311320548	0.84528079368196	0.390538941054273	0.354506904655484	1.74524693328253	0.431996549506332	0.301477097394671	0.114711966822303	0.179803116067412	2.60581949101965	1.90881620324812
2008036	19	7.39036372816745	0.0642375823431951	0.331873054277246	0.255671561874321	0.281522672734687	0.143191235028242	0.191560360520279	0.988485041855561	2.2315507991675	1.76703579933092	0.385511700993305	0.374077252290496	1.5793746311019	0.362615869189054	0.288236014995413	0.110585295500632	0.161140267393811	2.9952684213467	0.0858604864016928
2008036	20	7.16942934073818	0.0793961935509039	0.375959816329363	0.134026394097631	0.311334367952996	0.0959054305923861	0.429029086340836	1.0133052368953	2.04162667155057	3.06788911747874	0.391039496987876	0.385519681681426	1.25723011171148	0.254304888212321	0.289509096549989	0.108701691412313	0.144681864749812	2.75208205664542	0.342386055848631
2008036	21	7.35390861172375	0.244945705431427	0.414161595261905	0.0480064238550313	0.328555793538453	0.134917229484301	1.13039215868277	1.0111348541499	3.24751089662652	2.99661304870312	0.389617435367133	0.335789937088156	0.851246746549318	0.201848140648759	0.289105455713375	0.117783365196843	0.199720510799173	2.33798820295522	2.07467482373204
2008036	22	6.36489446051067	0.369911173986264	0.497740378575023	0.0358207952850732	0.171382130448203	0.358096698118132	1.2701773473047	1.07611927478507	5.11850647590039	2.83611054046667	0.374413488925377	0.281712459998057	0.480092395415134	0.175308894798339	0.30911605755134	0.13796598460686	0.192629737255025	3.00217279185702	3.67383695890061
2008036	23	5.94526694154579	0.346909344771172	0.706294854700827	0.0421607925784427	0.110569356769388	0.319031566257269	1.190193388602	1.59866819161316	5.80596663632476	2.45722871944914	0.404124280795215	0.248810843982676	0.219870454362159	0.14750795446584	0.481209554799994	0.12921299104902	0.190733848704315	4.94821792413902	5.92840440471983
2008037	0	6.02987570781815	0.0256340187450568	0.857766856901787	0.0791084800359155	0.0819596421899106	0.0201017175921824	1.12080366802062	1.85801962221092	5.05113855583466	1.90585441838058	0.427515759633784	0.233677869851628	0.202925045213289	0.133179780151421	0.567855838451647	0.10018369332775	0.115836307815535	6.11736275073264	5.54495525175635
2008037	1	6.23791387438775	0.0433870101548995	1.00406219700672	0.132554251848873	0.131937693706562	0.0673900993889433	1.07054097260952	1.05461392157501	4.59502297557583	1.67978540838412	0.476614484242668	0.22501008352673	0.603127972488189	0.126082126167421	0.57232715130903	0.0774089094541441	0.103198824979524	6.15718094196071	2.73124781180657
2008037	2	5.76060415263877	0.305075271101432	0.724494064951974	0.0294920035571104	0.300706613919674	0.324147024979977	1.02056303760075	0.578552366247608	4.69780217525334	1.72096754263933	0.942347114177561	0.219549357676103	0.568728126637496	0.127266689239386	0.30799682294234	0.0660902091806303	0.092192120846188	5.71409112168775	1.515944954763
2008037	3	5.20369417189117	1.71260301145371	0.300080464640143	0.017633897229317	0.295033012916241	0.892975365440716	0.926334918788964	1.62981371455596	3.14206149612696	2.57606595100897	1.4457628233908	0.218199264299838	0.602123678210022	0.130082462200539	0.18461495473037	0.0618905347986757	0.0793141557164136	5.4737146113971	1.89593661329411
2008037	4	4.46210508148854	1.93523896421654	0.103164463210324	0.0608094125905292	0.140077637900296	0.947888171266438	0.825290590582925	2.0188452222566	2.02785228746694	5.26035318733102	1.68980617025096	0.216690371662418	0.508877520051522	0.13110829883459	0.134875047026476	0.0504751313222853	0.0691039785853027	4.24909916785605	1.86124334177373
2008037	5	5.59891610007117	1.32960021770665	0.0809890267014718	0.247988016365362	0.110646704241749	0.589120864682299	0.775698258319725	2.36927200964268	3.2395241648795	5.09077078415099	1.71485072973546	0.216491010970882	0.527235834034113	0.132329344622266	0.111924590221522	0.0589868251449676	0.0688147253891927	2.54413163111677	0.565805051742742
2008037	6	5.60175184800701	0.29911729856249	0.0313147009526532	0.590475609927525	1.00233738523221	0.4129763304969	0.909924316425814	2.81137106667567	3.78133475482581	4.9693905444649	1.73343371555047	0.221120084146543	0.489263413874507	0.133401297043208	0.0950294883796727	0.0895874414638947	0.0802304108519857	3.56229073768483	3.06126385304554
2008037	7	10.3249949281172	0.205105252192256	0.094804658102919	0.611570496029653	1.89527908855474	0.288992852599499	1.33554593565766	3.10459972331751	3.66366300442116	6.00386478011716	1.8338258660712	0.243473006603819	0.388439107183355	0.132963576743341	0.0740589108075669	0.11527463189685	0.0392596647143361	3.90566753904272	3.92723193146599
2008037	8	13.2694307312023	0.662364047069864	0.503075803590918	0.376544896444662	2.36253629246065	0.490086361691046	1.41861257789166	2.25898809817441	2.86050375240765	5.24188354722867	1.78923354149749	0.292362557276836	0.427618381732967	0.131728521722264	0.0544049857561149	0.116117695163854	0.0348037183010827	3.64060562585715	5.85032707122229
2008037	9	13.0794200952677	0.612649663116879	0.269756695676329	0.0811375680961672	1.65177864608388	0.848238032927686	3.40204773006447	1.41230406701729	3.24706320363153	3.16047414406054	1.4536503632492	0.365693136128341	0.275452526267683	0.131522418665213	0.0428537641168687	0.0978893516087206	0.0324550936942533	3.72747755637662	5.83809308370694
2008037	10	14.7583516664639	0.0821059215041131	0.165725554295482	0.0651265773243416	0.914156864949138	0.573014341425034	3.51615732552078	4.9121871975848	3.26510703037305	4.93732851262934	1.22658780787075	0.418918201971888	0.156994534911267	0.131649228242932	0.122385522633111	0.0416814308489254	0.0305075624308338	3.72812148555539	5.63323866990957
2008037	11	15.0424390708636	2.06860228188	0.222507003972876	0.117882026376331	0.583028765890662	0.328659755759083	1.96003962622327	7.19643036807822	3.16928571095024	10.9448748651874	1.1143147739878	0.465980912408605	0.127842447986459	0.131469909662479	0.0897808556916409	0.0199190983913968	0.0508015500506536	3.48515602098226	6.18618603345587
2008037	12	15.3903489255289	6.92425304264009	0.205305103257584	0.14129677044691	1.31011316909818	0.299117156206859	3.66804132820638	3.93794307858159	3.38656420882207	13.6630750357948	1.01840525401524	0.524227785922637	0.130722929510721	0.132341952123582	0.0866767062992983	0.0140598125471916	0.364672553251523	3.16411253346207	6.18245013312582
2008037	13	15.5303006661697	6.70956043617127	0.411769588463433	1.36898939608506	5.43985292184205	0.0608085245704951	7.01929557761698	9.17001572190887	3.51194847774513	13.1793242230741	0.924571897520154	0.555785574928864	0.142216754415304	0.131647268129893	0.0958516492834722	0.0155644413826559	0.701475919144105	2.90856948233117	6.2690860231432
2008037	14	15.9737145303863	6.86510924904084	0.614935731530402	4.36054733618614	3.7572971752257	3.00199147222681	8.367279417639	11.8027118950947	2.10196039461221	12.5247064415539	0.862501068429605	0.59326489325949	0.212167551535111	0.132032253246811	0.105494015998555	0.0321459548038724	0.483676615937767	2.6787697944748	6.04218275047535
2008037	15	16.8368045589508	7.81719833217516	0.495568979496957	5.05777532005302	6.27708978012387	3.21301834849892	9.20125762276608	11.4904966755034	1.87597044547026	13.4638696845948	0.856484285925243	0.608005674381416	0.503072259377934	0.133052696114782	0.112040025737319	0.128071656496763	0.267318747320488	2.08005198012305	5.25318577477421
2008037	16	17.581729301985	7.58827249062921	0.38537954728212	5.38145871574946	8.72545873462297	2.83541022302587	10.6569490676389	10.2477407697103	4.42296081667229	14.8695874147093	0.821757955575067	0.540426939327446	1.24404672969424	0.133350519808022	0.0972091843310163	0.0241296049819862	0.198485999447994	1.50591157348003	5.12426819003656
2008037	17	16.465246355103	7.48395345210292	0.298079377409942	6.17469370030101	8.62135368457026	3.68783997770314	12.1147311977812	10.1237784307531	5.1538404647884	15.2200471053282	0.700831704618876	0.440046679347872	2.66614112433151	0.132377460376926	0.0891885561000888	0.539553968823109	0.162214586947265	1.4569767300385	5.07051763174801
2008037	18	13.4510611642739	7.24232040070234	0.22358133552102	6.0775762472824	8.64547467834867	4.42116362489458	12.3608987307885	10.6956445703434	4.67632216758149	14.5218693087498	0.592722717310409	0.389190321094983	3.44967019720026	0.130150428367946	0.0663121086699364	0.840041698573443	0.325168442733624	1.80561542578002	4.93111252314843
2008037	19	11.8628627296134	7.33625568368356	0.169343207784143	5.99843970473351	9.1743857851809	4.372753649927	10.6952335062993	10.1308502923686	4.49252846538758	12.8381591126762	0.459815075681881	0.317188024975163	2.73078652846975	0.133157444645317	0.0452518935320369	0.870598007809287	1.10912269333517	2.20160543484305	4.79239591141561
2008037	20	11.8117457643278	5.9365462810661	0.182434416368086	6.53627447902673	10.0061290062222	3.90778395007947	8.32468904286829	9.91294438253704	4.47608706868905	10.3635121472938	0.385269308168528	0.255710839147854	2.00281523759338	0.211469387597441	0.0336447588346044	1.56018880322561	1.67212908105818	2.4414167561895	4.20468434504594
2008037	21	10.942311795551	5.60213336968859	0.248547243947209	6.04097171872183	10.513646393146	3.72571424282337	6.42798969851525	10.3005722108004	4.78274013546952	8.23511151559745	0.367773104043391	0.229966078365086	1.547601823879	0.56980082529177	0.0244519803599964	1.96699688001554	2.12851050047172	2.53673364158029	3.48866041147987
2008037	22	9.64359441301733	6.85045227157215	0.331193317374592	4.83254939440579	9.97372111269799	3.37733806504284	5.06135434926477	9.38309974351631	4.85010537600286	6.85797916970718	0.354334279050205	0.21679739794641	1.26511270649801	2.55889320719985	0.0196219934320356	2.09838531836767	2.39813535394204	2.55567671423534	2.89464606773056
2008037	23	8.76677498047629	6.61997842762191	0.349003205004376	4.3231951444622	8.73110415102624	2.78930722247674	4.19261464451471	7.55413798244581	4.54720305362066	5.73361633429237	0.317458792606436	0.231457190328007	2.00560065297111	2.7646590073072	0.0200517063371533	1.86907185608166	3.77153625540143	2.50447421350953	2.05603038440866
2008038	0	8.48715328556111	6.34208767706083	0.31805390208446	4.36499106891936	6.73330493813263	2.32086343501973	3.85140702101314	6.08436129475191	4.72425071118776	5.85714551290617	0.259379678397889	0.286730720372382	3.55428574626056	2.22134504077759	0.0177512286312704	1.69496790375057	5.31958991102305	2.42883987328589	1.19989846580606
2008038	1	8.95648311556428	5.43092901262551	0.309140096890034	5.20654012564995	5.1952671765484	3.19391888278314	4.31922698459828	4.65899128054181	5.3229074554322	7.83012849398787	0.233410788380176	0.323517096672272	4.53295052409119	1.70163933858565	0.150789533484016	1.59235809839166	5.23246412412317	2.25027647963694	1.05684488773545
2008038	2	9.4837142014709	4.8402108919949	0.300371329605749	4.32672878171315	4.21510866175787	4.34474947057287	5.99938430783322	4.04850832245754	5.6587792807617	8.59400220254449	0.232039099573841	0.320947489039322	4.93780652558154	1.35973266152277	0.382006964304755	1.54725671941815	4.89593216577475	3.74447475740736	1.1368693663289
2008038	3	9.32635775598427	4.94368120124555	0.222651004559933	3.3435091975458	3.67866981658647	4.16634074653016	6.34888638025037	4.49776967550126	6.2718171155432	8.0607201471911	0.254306701735453	0.294307929699446	4.86104184853132	1.2253360979812	0.644045883154636	1.14585543658262	4.48828420878709	3.9946546856461	1.41672549638131
2008038	4	8.408328516639	4.80988803090471	0.214266765741836	2.73607812987097	4.01358361470158	3.12284030336797	5.80582069611662	5.74785171277571	5.3519608875619	7.64897233544741	0.299011450621962	0.278512940062759	4.41556927480235	1.03047699301211	1.02928382366716	1.39079769071746	3.59355093425759	2.99076679718923	1.45303630241156
2008038	5	7.74281962802317	4.71987681045505	0.21125469905593	2.50180485236369	4.80592174244036	3.3036291643714	5.43117842308993	6.26623535477804	4.68101595783895	7.31679040298153	0.319524775634288	0.250783912135832	3.28945603178836	0.822575473873947	1.15536122786945	2.31764202018307	2.14830371741407	2.25352261648516	1.74937432171483
2008038	6	7.43655290040779	4.99128217496891	0.220465753810304	2.55499378185442	4.82218052210057	3.0968809687344	5.20816916223714	6.0428604812292	4.02351245973429	6.81882657011744	0.328745871598741	0.241716631761685	1.94001176553489	0.641159984402212	1.37894078586278	2.16960987031725	1.2194207933115	1.77152801898462	1.84121434714126
2008038	7	7.2626353063989	5.21221760994842	0.216776158476109	2.71264575549196	3.98129472687954	3.11424656277722	4.92760892894309	5.65411998634844	3.35385888389596	6.24223112828468	0.336293324311381	0.221595071416565	1.3626479274728	0.45367891880611	1.51741671520705	2.12953774365023	1.02657656233143	1.44521079641898	2.14231357265285
2008038	8	7.10466860390257	4.35207768712645	0.20778618660069	2.76674246389733	3.63982866696212	3.19073799536183	4.19312405568317	5.1686252341338	2.80572546041214	5.54459776871986	0.326597583804803	0.188188846123871	0.836747043995905	0.349678635120663	1.54568743946298	1.72596868624908	1.18395740050101	1.32447793305433	1.9645559453569
2008038	9	7.07708440128361	3.88093649247059	0.208454478234217	2.98896488827009	3.48776669825022	3.02703913939644	3.33005544530174	4.48895549095476	2.52875935984473	4.70264082716708	0.301975616319487	0.139724119048044	0.730693048485865	0.368297600835741	1.80041382599156	1.42052508077346	1.32573909544098	1.16805372702234	1.67598872320207
2008038	10	5.68291316822977	3.54347770325271	0.196934277495329	2.91281525375768	3.26598685493882	2.96117862827189	2.53172810357261	3.75042471395482	2.22063487128895	4.10707595237378	0.29382411411425	0.112992911786878	1.07531363323156	0.409123099027703	1.96642029693992	1.24522396937322	1.34621714908304	1.08505065780244	1.68961111619552
2008038	11	3.50331434474284	3.0037602909864	0.477148430613774	3.0416817861523	2.9348972843344	2.5872985599339	2.26702365790987	3.09358476179673	1.93690974138727	3.8906760205105	0.292518663570682	0.0983891476320261	1.99639705258968	0.45141274993832	1.93465833074493	1.21518963799773	1.17786355197929	0.836900612174748	1.87675582201106
2008038	12	2.87191059142922	1.89029286185721	0.418032064053214	2.72705203216943	2.59255908848717	2.33732305554171	1.92142604205123	2.75341428125937	1.83107491362084	3.59411525942133	0.298638468091921	0.0919953350444797	3.28633431923242	0.549142487328858	1.86753151044537	1.3103582326492	1.00453829392138	0.788287896336705	1.46787689014518
2008038	13	2.53379978489736	1.34363853685513	0.27067273841242	2.52781027172801	2.30380248361471	2.04621166088927	1.79815826283847	3.14603478578405	1.68058631841436	3.26282822473135	0.319380980082978	0.0895500105460742	3.21513438150885	0.572471315431263	1.5074487258134	1.24556404348236	1.06131671816837	0.773063127595067	1.03288633425173
2008038	14	2.21177020634239	0.995015088333812	0.202948565453438	2.47933873386885	2.00071058093066	1.65276067164604	1.77273633604809	3.93351314801961	1.42516511162418	2.54559788532807	0.341116734719348	0.0877668453001377	3.17815365579193	0.596966292270512	1.16005744120577	1.15691428369466	0.945528158810716	0.78176399263628	0.84383079554841
2008038	15	2.09333748532817	0.823606470124735	0.161539104231935	2.55723766133488	1.85250073293422	1.19564522742602	1.69040074031198	3.75246021015973	1.23532334311919	1.99396059550974	0.334467628527017	0.0864483432658154	2.02688531461532	0.649466418488739	0.913797767932763	1.06120754040887	0.601047552711391	0.831493056767486	0.798032140426924
2008038	16	2.16746080139958	0.718068981176182	0.115861121720135	2.48176794110183	1.57455027000891	0.961280131667556	1.59752830782503	3.54351600189638	1.11847329758974	1.6752401632252	0.332619854644657	0.08707429799516	1.73681004225542	0.68706368812471	0.674433440106814	1.02957312662023	0.307901786316777	0.916796140366066	0.792348660321817
2008038	17	2.69168977280578	0.614086515049487	0.106317085622029	2.27061308919195	1.45839814384426	0.776280706918625	1.40797591670366	2.82105009390323	1.02497836245281	1.46651219146393	0.32959414278876	0.0879960714253116	2.29428031385953	0.695972980428069	0.495672135015931	0.999857405779415	0.266626009843891	1.01879590572191	0.698406649176428
2008038	18	3.11714877032513	0.564579975545405	0.103100089148776	1.19081275858646	1.48081174816064	0.630830682301048	1.14123765386644	2.03618218370568	0.946859500898591	1.52781154884773	0.32018170262559	0.0895227137988679	1.51988559121174	1.05753828098686	0.396634761804387	0.915277138137254	0.304536745823047	1.10258357130182	0.579165763666441
2008038	19	2.47289907594469	0.560313506956837	0.100804385031771	0.984053451595735	1.32318027635646	0.556342256451571	1.0072363546265	1.65196491852002	0.897374037731764	1.96923843385358	0.334598866890149	0.090219985455828	1.09911964772689	1.56951601655545	0.345738820187898	0.923114238768538	0.40062003136021	1.12065783200865	0.48487455288016
2008038	20	2.25192227069853	0.569409611630797	0.106811481419901	0.816705943060369	1.19897574511083	0.521611166397689	1.01322820433001	1.54993511332698	0.952892953719771	2.63549415736699	0.359530882303539	0.0908557171686785	1.94851241374987	2.35803531869165	0.314341847969378	0.912343188623165	0.445755519489515	1.13650066481198	0.418766352052002
2008038	21	2.65138805035181	0.517790773883109	0.10795297849286	0.652363047577323	1.14560810954829	0.496500148413884	1.25945338015543	1.54361056555331	1.42613390433286	2.18319020841451	0.370767593341372	0.0844390595484884	1.95751572549858	1.45454006453845	0.294537660241972	0.918798515309198	0.445167271101234	1.44452265881739	0.367855588278793
2008038	22	3.39442081232892	0.51147865049504	0.110057944112307	0.544406440961122	1.15048867981914	0.46951022311208	1.61446863917031	1.39913461230383	1.55973989758976	1.58317765306239	0.461311781640204	0.0714596757974035	0.740468976286802	1.05171397373242	0.26822968899974	0.877941708688893	0.450048998120512	1.89090685901374	0.322125534796924
2008038	23	4.27139371112747	0.502544695185316	0.115266071465529	0.481726779500039	1.24724566033541	0.453949151468941	1.70545338831074	0.998294839557803	1.32114180912041	2.75384613602146	0.496695296531883	0.0626938799522763	0.295566974516526	0.61775725525977	0.239359889990549	0.836925459826145	0.461445999873637	1.63898238283678	0.285416107459467
2008039	0	5.30327650356949	0.513988588989617	0.125421955231214	0.453590185688062	1.29850847063388	0.444143611901211	1.87713886894439	0.799924607526182	1.25692768966373	5.04417736096763	0.509008918850766	0.059374345809949	0.35271678573538	0.576237368256077	0.208620126739658	0.763084444903587	0.460685034791196	1.45706380883872	0.262172876312648
2008039	1	6.35430062034149	0.555526626283134	0.146639569653575	0.437728060128031	1.15274412852392	0.437962930555803	2.47093570968428	0.699080411892596	1.46405366157904	5.82413946901691	0.508945939152223	0.058215420158215	0.313629730262128	0.541249638863433	0.172766696877883	0.693359550109048	0.447419687322892	1.45418625142532	0.252749180661203
2008039	2	6.38672273586313	0.566610040477287	0.181466221777975	0.429317758520346	0.828577975410652	0.444955843475522	3.20387192317062	0.680253165483257	1.36981449684901	5.13306997220137	0.507742890713868	0.0581760067754533	0.243881634564677	0.481565467630082	0.136024699879382	0.621346383773463	0.429911262367142	1.60669138974709	0.254241190425611
2008039	3	5.72473120097306	0.580467193544522	0.228803548025278	0.416410557266889	0.679709913800333	0.455667410209761	3.39032134435103	0.683078144136813	1.62007489942388	2.67931248827402	0.553713868727681	0.0592761893925529	0.204201362608776	0.455992613256491	0.106691825471427	0.563877379443279	0.40938275554082	2.41987294444148	0.270349934760043
2008039	4	4.90487693349761	0.59111125269487	0.270501023824846	0.414403776136994	0.576376260239477	0.463387138873715	2.39570012963671	0.695565130072249	2.67110323044177	2.30707259484612	0.626560798261903	0.0619504785878496	0.185712323756475	0.440334995424957	0.086731648915097	0.516320779544166	0.377240169111109	3.47543588177484	0.272784244317765
2008039	5	3.67862002678995	0.606806565719387	0.2880806815135	0.415041946313577	0.592031265030661	0.459153291059698	1.74236330530901	0.650518851021708	3.51781567375195	2.24056749359395	0.848962610964187	0.067800769868761	0.173669934313466	0.427309837430656	0.0827750287005961	0.470101209341978	0.286023385459666	4.5735565331789	0.263207551920009
2008039	6	2.84155667064782	0.589212086521048	0.289545850503053	0.448636175382042	0.536871465795977	0.451154654219086	1.61485010162637	0.699943610368466	4.15580629095905	2.09215943767261	0.986828116631926	0.079762654836134	0.177153631525484	0.416710029414993	0.0927947174613458	0.427548018048996	0.292493344719745	5.05977005036018	0.257466119167529
2008039	7	2.40116754792371	0.566178857265477	0.286340528383176	0.515665501065945	0.553199651177765	0.438399306377548	1.43550617623576	0.76880391595052	4.63766326598989	2.0630425085275	0.856778860616909	0.100614096043374	0.214372180870791	0.409689249200615	0.109527931085253	0.388103585262686	0.280051716748426	4.50867246948395	0.275565569025253
2008039	8	2.31897569440534	0.548523279721026	0.258058130370294	0.534096557782673	0.576280032794036	0.505294231497874	1.22704551766788	0.860722889582855	3.91112309170387	2.00703466300079	0.793141678274961	0.13128751347256	0.257385023378048	0.408571052062372	0.18622746621125	0.367142760880538	0.298910542680459	4.10453330189842	0.303147724453204
2008039	9	2.45804958312628	0.543831936707897	0.314402144924493	0.514974030566837	0.561567192468354	0.519500394647522	1.04223897875586	0.887087165022023	3.26777495130091	1.94354463885865	0.742242305553073	0.151748902456592	0.357076317038577	0.430141576466906	0.172457898888187	0.345960825990032	0.358287528776854	3.32604789679006	0.318472047969156
2008039	10	2.75740038345007	0.523186504997029	0.404264707807708	0.641639141604507	0.530909431669198	0.670072930504235	1.33320052586677	0.882917304884701	2.60015575295657	2.29122763120883	0.70906552016109	0.160782862165712	0.689695503647388	0.454520306453703	0.186125435407537	0.304477042442382	0.454640119910321	3.02055045997664	0.312590837617538
2008039	11	2.86468737587704	0.527758122976973	0.300874028021815	0.557663474862694	0.578308889647559	0.766616655746256	1.2424773946229	0.909646627118524	2.57003850049191	1.92675391422326	0.722970229679803	0.152691971108872	1.27135036846614	0.511475851683635	0.151892441264183	0.268661270364247	0.560973443012248	2.91756299865655	0.376599554252693
2008039	12	2.94445451786451	0.668388832576995	0.29546860856141	0.506902038078375	0.603226995976853	1.02406317511632	1.10804562726109	0.951350388763643	2.42347354763891	1.66266320508816	0.753993548609098	0.159677375897522	1.8122698597738	0.684676871846697	0.117097148750796	0.250666996266248	0.725194645751863	2.71528421884699	0.396960317450595
2008039	13	2.94812548691553	0.557388566583971	0.192323210553305	0.452746297544426	0.660660239740559	1.18890791752671	1.00032743948433	1.01282171685306	2.24357431211602	1.48277890499896	0.764748208106058	0.138624409390749	2.03766775534398	0.6435056605707	0.105827218409579	0.242505988748512	0.875432132585116	2.6813430924009	0.396582844158561
2008039	14	2.7826713554339	0.534881130001279	0.152940193769674	0.39517195929945	0.720530168157847	1.13471351244886	0.903642698889475	1.10078151793533	2.02819403497223	1.39441585318912	0.691247789207457	0.129902244692256	2.01552652236483	0.649915982459227	0.101494551025837	0.265391414378638	0.889227619954584	2.62468376515852	0.348986850555961
2008039	15	2.61740658933729	0.565509307414627	0.138148951124445	0.362288982957791	0.744124969725821	1.18573112353392	0.880651707285702	1.43188340967223	1.86867611121406	1.43706768128673	0.635629109836574	0.131647008092894	1.74736588680606	0.639286385758655	0.0990703246014323	0.308280342125613	0.830555139648441	2.5679272528985	0.267642491568303
2008039	16	2.29168105457159	0.548959200593901	0.136749845483353	0.369794926317894	0.65807898712433	1.09846075354255	0.983650449553687	1.52522111980864	1.89066956488588	1.64824159643499	0.634778714057226	0.127920531783186	1.60266242577786	0.658793950735637	0.0972723036579678	0.234632529565262	0.667847596470243	2.53701284730425	0.260516804262855
2008039	17	1.7339966837919	0.50627412122215	0.13831485650498	0.393919317826112	0.572217445047853	1.04336669093807	1.03572929170293	1.51828377259187	1.98260308029186	1.99516582772159	0.757047991033672	0.134070112903168	1.54560612985698	0.648653342864278	0.0945379459458573	0.207386965656331	0.51995404799582	2.4378601701891	0.235624129745768
2008039	18	1.47400770231113	0.486303164949629	0.14949915185974	0.424831113742079	0.527769879861219	0.9693682019019	1.17145009644567	1.35974944311036	2.02088054974868	2.03135205241504	0.838350977919668	0.294513354212648	1.61766879719796	0.685258433000017	0.0907337710408042	0.19081868133611	0.423785764382935	2.30989173530545	0.192997572570517
2008039	19	1.28214817204971	0.47412866460896	0.15175698170368	0.441500565504608	0.507640218297087	0.923823514876867	1.27591280948484	1.27979012244352	2.06473537701455	2.16954700358795	0.866515797402035	0.584107295065285	1.62845703384545	0.771223747136046	0.087375383343377	0.183497325856273	0.373488405308106	2.17773819654415	0.146212682188981
2008039	20	0.991012532786229	0.446665926282703	0.151085447859779	0.450855983469415	0.512282823104499	0.888446644483631	1.33036027851167	1.27538589113405	2.25193805258791	1.98011817314379	1.16206799004413	0.916365065314872	1.63470228225229	0.854799388922593	0.0842633311725133	0.17930022534551	0.349802269490263	2.12773307114511	0.104215494802256
2008039	21	0.82575945922819	0.424424321856069	0.209791625245209	0.457050657210485	0.725044954352465	0.865645739249525	1.31205327419874	0.818168895092981	2.58151594016811	1.90764663982623	1.53980198223381	1.01488881361058	1.73418284302451	1.04078792727688	0.081612661013124	0.175693798057972	0.341465981361496	2.23582018172129	0.0892287277164117
2008039	22	0.807507186218896	0.413191753316597	0.221663532526766	0.478692685218862	0.868399084822336	0.857299779549231	1.24830342310511	0.674707931163134	2.89955956539212	1.7126999025528	1.93824549700422	0.947273876674545	1.8097950919564	1.39951653425279	0.0795572737905323	0.171755162567514	0.34282523201993	2.50067252791342	0.119777885174614
2008039	23	0.912400735275972	0.408142249643062	0.237296921979732	0.536244312106937	0.922166339411832	0.874939214069093	1.10382281156541	0.637239489727401	3.10578902167325	1.49443803287584	2.66218788402872	1.12865176553324	1.83864794391616	1.78939399094621	0.0777816683648458	0.168296437168052	0.374566561187855	2.85848192793905	0.211962234105622
2008040	0	1.09048011449783	0.432955122446435	0.247194630162479	0.546350668121732	0.909982241090379	0.845131768178039	0.886996738100971	0.665492514655581	3.25595345511474	1.51680206559479	2.11178945341823	1.10908256939008	1.86060602495608	1.83417608835057	0.0761649310382881	0.166377436884822	0.428760083732266	3.33340298449417	0.248851656637722
2008040	1	1.24938011137841	0.426479479697222	0.239624051599245	0.536053058555571	0.879859562763451	0.810733200082435	0.733991136930942	0.750748241129463	3.44627539119433	1.08840809786051	1.67850975751994	0.819313908502197	1.95648625966179	1.73933539711221	0.0746193152333912	0.166962597266902	0.493767957311303	3.72577118591845	0.264752305583032
2008040	2	1.34441903095688	0.4339685323592	0.233765005125973	0.564842763984204	0.823574729244471	0.776326693575374	0.585694004159143	0.835148271998598	3.55759681862658	0.789858381122272	1.7257138317794	0.57943117103594	2.04635054588142	1.61833903873322	0.073109577243081	0.169297693437732	0.537653177481157	3.97505273325636	0.265235548575558
2008040	3	1.31113447199128	0.43800594591671	0.230007388627069	0.616605938214851	0.757388378033344	0.743197414862899	0.463248728395526	0.881160091508958	3.3897054983787	0.734117261049642	1.84519422446331	0.473371676598822	1.99360709145204	1.48624366539981	0.0717077512117948	0.171808069452922	0.532528760241709	3.95059376135695	0.245860736117738
2008040	4	1.17925483942699	0.568733083525846	0.229418388946945	0.678794732805482	0.638372592343292	0.709406933944091	0.421400129228465	0.879895141254185	3.13642269001984	0.751962787312325	1.92347606921412	0.531942797730481	1.91602856458473	1.35135545365479	0.0704758944532138	0.171946865233158	0.520341097688712	3.17513536404647	0.214018743398686
2008040	5	1.1002632036062	0.596417820547366	0.229751010729868	0.748634234791147	0.518180997845454	0.684487130675224	0.421112034346889	0.909658199614071	2.73508936327595	0.750175284319733	1.969877840564	0.531136126238461	1.81078168158554	1.22504212786781	0.0694535786169612	0.167699665249347	0.562556073640408	2.00133249169341	0.205756114965743
2008040	6	1.13395048260055	0.708976070663437	0.229755870351607	1.14855526979215	0.585686009472228	0.671228833929712	0.434256999657509	0.899911160138962	1.87242547446102	0.777850106353956	2.00267755198442	0.524608671918987	1.72694875716257	1.11426091777843	0.0689921434974907	0.160141419800284	0.605416444397527	1.84011118746696	0.208942592113064
2008040	7	1.20984410501781	0.681761573318154	0.229974524460793	1.05649820523261	0.611001959154535	0.668752144047169	0.439291176943451	0.875367097721622	1.30814350851703	1.07569978257163	2.03318226511459	0.508943306255826	1.67764917921076	1.02538687257715	0.070061630182036	0.152884730507706	0.585191188211457	1.82900851399267	0.215123266791528
2008040	8	1.24213897599437	0.691477534787042	0.234454637669387	0.883930395214469	0.564179631042572	0.63869550131466	0.684106282385044	0.830724954979935	1.26590842205949	0.979171277273366	3.18284427189268	0.500753783646462	1.52940712692239	0.944961329311105	0.0857721325487678	0.187275875043396	0.546644866917639	1.85401147216809	0.19590000586412
2008040	9	1.22257357054387	0.700554353625041	0.270616796054519	1.13823491753284	0.536638805546285	0.586300753572337	0.664567759537015	0.737548195064043	1.22050762940545	1.02229348822572	4.06530309047077	0.567772852766771	1.35289726815453	0.894254368127642	0.0968128328106225	0.243168496579016	0.51200202044226	1.93561156656642	0.171348827225403
2008040	10	1.20377837255319	0.712859808227104	0.33499835046272	1.33179068491217	0.437001193591199	0.583381052478183	0.519258086166423	0.624821089392567	1.18212820059937	1.09326007064668	4.28935220419213	0.722485773461687	2.78039318727544	0.918856140006641	0.134177824000553	0.226738969403484	0.475911422744656	1.93631599406633	0.159818113685969
2008040	11	1.16357265947888	0.84501277774383	0.436351120847686	1.24551924568332	0.333133333060039	0.740880655048153	0.489443371395925	0.542665335416152	1.22346834044009	1.11735381196448	4.2731516763433	0.832157362795011	2.56159220695788	0.94623517585472	0.329412895618129	0.487724046974666	0.496856454013163	1.95498446367279	0.229696369216985
2008040	12	1.12256863528314	0.792837212137757	0.37522962788651	1.05340569110589	0.353988351891515	0.759835271121588	0.448288270495416	0.497853397885392	1.1202370555733	1.09193151816902	4.27979524063443	0.790189582082354	2.23018522809823	0.886516734601523	0.373580668491708	0.43678405645997	0.579059446514943	1.61491951970579	0.200701249123524
2008040	13	1.10290642614441	0.670412785590998	0.339289407110666	0.955144888564639	0.344697191016697	0.701510175355596	0.395215167411924	0.449784105843573	0.93496790450236	1.10851206558228	4.27448693198531	0.728576361721786	1.89425725236953	0.783175413283052	0.363527981287339	0.402601612728722	0.627736679670491	1.16981025114012	0.27862551027654
2008040	14	1.07305574642006	0.638054166277409	0.303996250464983	0.937843057319049	0.296583693603832	0.551597352800738	0.385878534919697	0.402583054967555	0.791583315318028	1.11364367563954	4.27539886110124	0.690032545409563	1.58566276291073	0.717574629576622	0.332833920825857	0.357352896380679	0.706956313701553	0.926707195709377	0.253485450840114
2008040	15	1.02559992264179	0.663088458735139	0.26552710096212	0.93127643174582	0.224584604424131	0.368403832363537	0.393799071187135	0.36309587267785	0.703371219372648	1.18595530202395	4.1666523440256	0.670733174697592	1.51342867224345	0.680671428387986	0.337835210489423	0.304403679415629	0.731573900933649	0.768316439875308	0.212116477218842
2008040	16	0.953576761289071	0.649336905930374	0.244020145748533	0.870191245346388	0.187163721483271	0.250274174938277	0.400598425174314	0.335088836364939	0.63433370505208	1.15876083770727	3.88813188784458	0.714259446011227	0.971942648189947	0.650896773785114	0.296951549646768	0.252467673080729	0.703370238358868	0.699906032617201	0.220012946795319
2008040	17	0.886234132787323	0.63019510233374	0.220657337085858	0.811161905858065	0.175961907001352	0.186989019944775	0.397672418972756	0.323552636772983	0.572036920357455	1.11158453530615	3.83343702010225	0.76381531885683	0.876041998489145	0.639503267834256	0.233493032491615	0.205051289971031	0.64296606634622	0.665857269571294	0.226252071151938
2008040	18	0.821285644936928	0.617654730078649	0.200298349240121	0.761411628295245	0.193421513613678	0.159944158194653	0.412263080924831	0.346742496786891	0.529453652787038	1.1002778365919	3.12623570346085	0.84828548105656	0.893244579870834	0.641972172789575	0.227832792613756	0.183058706111176	0.552726315951826	0.666979530571799	0.231027036378117
2008040	19	0.744135576232695	0.618636909438733	0.182745024981614	0.706939303463592	0.249265751552046	0.145364356145031	0.473320150965803	0.386696673624787	0.500645745935425	1.1129674085598	2.35161263697836	0.877631623632071	0.941624196086176	0.641623049405044	0.241616161555567	0.15254125559014	0.441695130376531	0.715599754814202	0.225549016925381
2008040	20	0.703787144651542	0.658299093101079	0.168996008359343	0.628954334766001	0.372464051487951	0.137642397329979	0.506443898292116	0.408733238386862	0.501468875831453	1.11245209845938	1.91447603823219	0.890164106939435	1.25723659770568	0.642034671603293	0.211478692716844	0.138238282066901	0.360864282678875	0.830467993291467	0.212236715097011
2008040	21	0.666574732135607	0.710170673657245	0.15592938678487	0.537776122734499	0.511533931221352	0.133160059259776	0.516834316563654	0.45842280787341	0.548187555467735	1.11700581495859	1.63324468269826	0.928271140390641	1.29729951354439	0.651727480190518	0.188643031919879	0.128691353208308	0.327550851149611	0.970980217492061	0.201406322242472
2008040	22	0.645929904335913	0.735101009885698	0.143201460429971	0.415893154963401	0.611940746762294	0.130105224648994	0.477356545605553	0.521904767299068	0.613979833967047	1.11591287583985	1.42708686806715	0.954860573686729	1.40585502242686	0.644875077382325	0.162833910482156	0.124413020623295	0.376387798451232	1.05339227368122	0.196909904920435
2008040	23	0.649436305310034	0.741347373305755	0.13214436984408	0.318735427675294	0.677554078051472	0.128801321029647	0.497107473003577	0.598922474254353	0.712966445752318	1.0869902292999	1.2593839135512	0.938381255571022	1.58229935757511	0.640343575909945	0.135647178805375	0.121426963512499	0.451313863913679	1.18504131456559	0.194373789073305
2008041	0	0.668919421893646	0.723099292534822	0.123115914923408	0.258570370286857	0.701268711776804	0.132197326656898	0.555507753806546	0.630696332936726	0.825482886677213	1.03712763742382	1.13880025179495	0.899785061861583	1.73782585635053	0.645213804477207	0.121557940948198	0.120563367994545	0.609259121566038	1.30019926154373	0.193440786838716
2008041	1	0.69924039356246	0.699963799606208	0.114550480210131	0.21971815837791	0.690035246636795	0.133996330935261	0.587229987703958	0.726296217185758	0.907382525276816	1.02099840544867	1.0574840275389	0.875963252563008	1.80132079737944	0.634647627508302	0.11815834677752	0.121580824771613	0.673054696099261	1.40650657175549	0.193788825580524
2008041	2	0.727539632279651	0.672933479312794	0.106279695366693	0.196712778752047	0.777893325573306	0.132590389096111	0.616537494233978	0.765393032722888	0.974412502608069	1.02290759438376	0.99003741834617	0.865104657281254	1.65740905343919	0.613466217072326	0.125150079168867	0.120987122743491	0.659125302994984	1.42475488729065	0.196216282365884
2008041	3	0.753245587439387	0.629506062871839	0.0989269145841447	0.182646579958609	0.844052228864614	0.132138828009418	0.63755258492359	0.820846530669512	1.00446180971026	1.04862900256194	0.924245952045214	0.860796153100176	2.04177515374854	0.598917803232801	0.141157042692984	0.118198628160369	0.627371328034209	1.43717212328521	0.200231242875448
2008041	4	0.765662125497967	0.571831512412984	0.0928016555621294	0.171242158480255	0.805867724820997	0.132635526567697	0.642593273292805	0.851110711188146	0.972294390611911	1.08341433397579	0.870280925323892	0.860710190967863	1.99903954197098	0.587264388175377	0.1768665705711	0.113217150788693	0.613382247637492	1.52299420162784	0.203852722290246
2008041	5	0.761979465051428	0.532614226238805	0.0877690313469145	0.160799626319745	0.833691059464495	0.13467907958081	0.63968351358303	0.864215718758793	0.930352680444125	1.11940678594389	0.840301372543285	0.852959287581821	1.96159320811916	0.577770851948217	0.237526782526995	0.107663965260103	0.643829723468241	1.61367681287654	0.210413684206264
2008041	6	0.750122076781453	0.503937635121347	0.0836703665371176	0.151697874328044	0.814009555064945	0.137482246224082	0.635729876794003	0.902885061357336	0.927610462669286	1.1184775838651	0.816712143959133	0.834416056364622	2.01819222529646	0.566769307055937	0.25962113667028	0.100602752763874	0.657452891256792	1.69649558986766	0.218771533194825
2008041	7	0.741041488028536	0.473068850316502	0.0805694079194978	0.143974386683485	0.717176213730839	0.139945736765806	0.629350749850048	0.933959966055624	0.944472627547272	1.05988666813501	0.768288781141019	0.810736412910461	1.97571996725418	0.552488444010217	0.264099128007972	0.107069854398938	0.634320891637235	1.77074483843435	0.224817339619896
2008041	8	0.732003740342061	0.436206887715136	0.0788001195328014	0.140399604662178	0.675186723197611	0.144848491973884	0.655550565956079	1.00507885393097	0.944647123239402	1.0326211099378	0.718867327770525	0.79467158670306	1.54772807105474	0.53353749054346	0.283885871324885	0.159747476917365	0.543804823008919	1.80005070717711	0.230199844875353
2008041	9	0.721528459101105	0.538149019166647	0.105539725613233	0.13822818081138	0.631721384765715	0.183563988236923	0.7003856083223	0.979885876971457	0.959791523916126	1.05376602729001	0.717700433750666	0.784614837207384	1.74309756453637	0.511598699558478	0.263248157254106	0.263119771828192	0.429563351505596	1.8128724264026	0.234125130452516
2008041	10	0.70155894291403	0.480187849447599	0.165498323369663	0.262192511579479	0.552121797966587	0.233343150620606	0.805443699258956	0.893525775475975	1.01850167641464	1.08874638460261	0.750181893082423	0.774444909025159	1.86342862930935	0.482489441314279	0.328139720681489	0.14754460017072	0.369935854718347	1.82839851603159	0.237379580273633
2008041	11	0.692525267356533	0.561802859761206	0.229565713493183	0.216444460693855	0.712626844039117	0.340369635259176	0.796865695472235	1.03935826064074	1.10006780446236	1.07998092594145	0.811904553995058	0.760050298311392	1.72219596823533	0.469689113451541	0.389991653741526	0.194288853505966	0.417242011365344	1.85564267120693	0.241231807680482
2008041	12	0.714645093645344	0.547065458156293	0.231176543242028	0.250992639425103	0.611783557355625	0.308747821149393	0.784146704040642	1.10137515372246	1.10513527281557	1.04741960768422	0.8195506512634	0.743961156531491	1.72837087108033	0.469922544331623	0.405111038010989	0.197399346383194	0.488734763272462	1.89624296270294	0.30083365198754
2008041	13	0.745793170827467	0.466857962088405	0.173594155030293	0.264854561121231	0.538036262239908	0.316495566398245	0.791291368783233	1.06286836890822	1.09109778933116	1.04001723042685	1.12759350693873	0.721832025488805	1.68089200450502	0.433265471068414	0.353240280702479	0.17345449344149	0.518168248658586	1.90438914312021	0.550908693830937
2008041	14	0.776547160193404	0.436200873258128	0.140551904171586	0.299907718570387	0.51310634538638	0.26245682550203	0.759355488663614	1.05144838445443	1.07914055536623	1.05055908786342	1.24813881112503	0.686869614670314	1.62395642594521	0.339746072481082	0.286666090588728	0.156218627438709	0.488005820888278	1.88785350484255	0.431444666468961
2008041	15	0.806168147027443	0.389991779532813	0.113735082664894	0.255923503751729	0.493490352329658	0.16828257873535	0.762571283913257	0.966626303974039	1.11161625564311	1.07208660094303	1.32995821857751	0.638230963676069	1.52753426399648	0.200623951623814	0.234771376780407	0.12515472237378	0.455224607284575	1.9206432960959	0.383273639564103
2008041	16	0.824819777372485	0.360058500195279	0.0946415800204161	0.237622765601506	0.457561635734712	0.124434840977093	0.808123717659789	0.932466657725868	1.169882498152	1.10188282975591	1.25817288419704	0.588288057984416	1.24151431662589	0.155338262214934	0.188661542265887	0.113359870118724	0.432334712022261	2.07796414766797	0.345234935899987
2008041	17	0.823204631226354	0.334681123432066	0.0790563397597896	0.221323093163242	0.413707212328315	0.105499534540729	0.868183158196411	0.867359708676611	1.22184559908738	1.13967506917961	1.21942045981856	0.56066217837891	0.890430748739226	0.171372174468972	0.162728382393378	0.0979205505153084	0.384721911211648	2.37031517112703	0.312567927103136
2008041	18	0.811388064000776	0.312778952842943	0.06880765474997	0.201495034292095	0.400019012140795	0.0922010724474192	0.910197949289779	0.805092759187911	1.26966161176953	1.17027183090203	1.21163421954602	0.55943858925756	0.71279022971792	0.240400238974598	0.141117856365298	0.0732872395105667	0.336870191432736	2.6636462113001	0.284405414264729
2008041	19	0.79579684202578	0.293626723617284	0.0619362209859223	0.183699822576834	0.466079519102714	0.0842180377992103	0.96108458755672	0.830314793312425	1.36649288121288	1.16851017549493	1.22878049062509	0.568592818565185	0.55967839636592	0.461530257326795	0.12371456277622	0.0685622419480444	0.281985117044336	2.97005146118725	0.250714592008489
2008041	20	0.779387103500906	0.277532744875593	0.0638931915076209	0.17040507278675	0.569814528345748	0.0792685929373232	0.952623936157649	0.89804400349034	1.57337282868864	1.24162475693165	1.21203337612915	0.577571193538319	0.437268649169789	0.553141412163595	0.10708145094936	0.0654722639547116	0.227775184102289	3.48270185853428	0.219528308466234
2008041	21	0.766066716437082	0.259161957161565	0.065236602970357	0.153175400482354	0.64155899387797	0.0762265088014688	0.921958461573992	0.94938084885329	1.76685158311912	1.39355506612296	1.02684324397807	0.579483995649931	0.268624258386526	0.549152238352846	0.087743502770717	0.0626783483360156	0.196211904184384	4.10448402575811	0.190047165121108
2008041	22	0.760730895628856	0.243375691676591	0.0662542021787149	0.149244640288911	0.635961898929085	0.0741623590573676	0.878101625216699	0.989027259144118	1.82724813666499	1.65888627233028	0.891612129847769	0.571573635158364	0.242712056966555	0.552947967064419	0.072475564120916	0.0612345205075908	0.178611406004423	3.84649886487776	0.164515256456621
2008041	23	0.757368346301141	0.231796535334316	0.0717466358648823	0.128807225153894	0.63156046787058	0.0724374392014621	0.829221206668658	1.00783452234829	1.90588402946341	1.9612867748142	0.818079746033169	0.536937318007603	0.323930124791919	0.550944470150951	0.0593755530851197	0.0603535998835409	0.191641584407264	3.19419489314815	0.145728404452887
2008042	0	0.758581128205367	0.223747898345391	0.0805588003854176	0.135556378100139	0.650332564931371	0.0712022236415409	0.802928860258068	1.01488949986145	1.96001669476805	2.16698747192577	0.785171780885768	0.493817478320807	0.358993112591938	0.544339756639833	0.0478234484802968	0.0599055122080496	0.202312269340812	2.4764342912888	0.134804268929456
2008042	1	0.768372689236102	0.218890453985374	0.0863742006063741	0.139356207684279	0.660092885754009	0.067299223210072	0.812719358414804	1.04909929926489	1.99734525271088	2.20635399929865	0.781086386622142	0.461236885137934	0.368464951643874	0.536688916927642	0.0374184305033952	0.0602940262070756	0.231902062433641	1.69815790855252	0.136218255067545
2008042	2	0.774241073363298	0.21504473784158	0.0851992915992083	0.134123348956154	0.667098066577241	0.0640364078223839	0.821918623483952	1.11973960887552	2.21221736161522	2.0571171748279	0.776168182480859	0.431765354568884	0.33630052945819	0.529443689429905	0.0278100410455587	0.0620200002245574	0.289678894908507	1.15939992298198	0.157993643315383
2008042	3	0.771912188092839	0.210510948851262	0.0818952625144942	0.129729616647105	0.67097286616297	0.0616841199073815	0.824330374704137	1.20671018071345	2.54420423499531	1.66463200662304	0.784746296998227	0.407739628154649	0.336462676459682	0.521544653061751	0.0198776643354436	0.0659142599458789	0.289851242451763	0.929434108872149	0.206769680981327
2008042	4	0.766733342095747	0.205411756643291	0.0783144918162073	0.127706397240396	0.674242063256123	0.0601162768933961	0.820039199652308	1.28933892297043	2.49223459445744	1.3353193737668	0.815578559739898	0.389254390667738	0.356014915200298	0.511946654967221	0.0147752994128421	0.0726474678069669	0.331444878952828	0.73380855604331	0.236093445690034
2008042	5	0.767327882740493	0.201262012481843	0.0746170810399904	0.119092898972266	0.682155516653968	0.0591988419136824	0.818376505562336	1.35613104321933	2.15809161672165	1.13137016521992	0.853274737120668	0.385331508179545	0.366196283157819	0.499870633670769	0.0118407140939505	0.0825698609645105	0.401248898381694	0.734689247850946	0.257087664073719
2008042	6	0.77874315031886	0.197442759869182	0.0718597357486137	0.113043759525136	0.701776793316848	0.0588074077538444	0.835997565746754	1.41199256345275	1.6255493494366	1.00562758976186	0.88908289058452	0.400339455947186	0.383668973141096	0.4852099481762	0.00993298816188127	0.094722188224363	0.472563421255026	0.641943228505736	0.273920695052038
2008042	7	0.770947387845299	0.192990005505658	0.0670260916772748	0.107332217404795	0.728908464427893	0.0577553056763295	0.964187133590692	1.46755012499389	1.19661166734673	0.931650516090061	0.915794006779154	0.427161483875055	0.408748258996242	0.468536192152266	0.00812769845544488	0.107648921344942	0.481153735289005	0.498294324130525	0.279874725689738
2008042	8	0.740953210259604	0.187563246857324	0.0728447111984919	0.113727715733953	0.752319492626141	0.0564819847120734	0.96997048316073	1.53620866807089	1.15878444157797	0.927198946239786	0.902737889596463	0.433727233072701	0.425836069987861	0.451864489237786	0.00506074655328749	0.114924981040623	0.49733453260832	0.420348746670834	0.315489953012839
2008042	9	0.697886997930572	0.173491338797467	0.0897076441104465	0.152023569572537	0.808454494766181	0.0601635317164637	0.890277052984821	1.63526772197104	1.01471426915986	0.945187915459444	0.925716571218631	0.42751101680485	0.521884512954552	0.436341532958579	0.00372480077306911	0.26029136071175	0.496570019096737	0.366845642847331	0.351344073631141
2008042	10	0.656453467239319	0.303303727652397	0.115847597013371	0.183485768776876	0.969438978960819	0.0766378398730728	0.801317867519628	1.7561732281364	0.997540392041752	0.693571982368705	0.949580310306337	0.412950937888114	0.646020296967819	0.422197002365352	0.00264596719103491	0.284621654068936	0.458957414705617	0.3356164606448	0.364705876859556
2008042	11	0.623747675666887	0.472089539864592	0.11110210775218	0.170073649917441	1.22733588919387	0.101702786739188	0.668910825654326	1.87579016653059	0.69687531298444	0.58582942631829	0.950268176698227	0.389716978235893	0.753204758383681	0.412230750120232	0.00151083611520552	0.260909431776718	0.408104374506084	0.327040033593755	0.522346621406351
2008042	12	0.598982371550658	0.524180771662971	0.093651658735531	0.17850420449691	1.42510096034522	0.160217321592082	0.571571357082892	2.00124069459981	0.510767279024582	0.526125383299457	0.914872401403942	0.347499421055087	0.822146768514116	0.406967079697034	0.000886484492613198	0.275030263915766	0.38508950839306	0.327691812480324	0.628621784178181
2008042	13	0.589202310249206	0.491348268743593	0.0734109198395997	0.190148996095734	1.53953710319401	0.193469739870957	0.47787050229846	2.14065783130081	0.438925095726086	0.45575839137078	0.853037609840572	0.290975519597647	0.913241532873035	0.402305293277833	0.000561762158735201	0.261350830618607	0.417559093658773	0.336897547647553	0.581060671891586
2008042	14	0.70473612070048	0.497121211179645	0.0575455042902163	0.216680327571223	1.60519493856497	0.204484377210067	0.42226070598879	2.29006124715867	0.394671364329644	0.373739992665443	0.804815911389574	0.23078754797134	0.975627579338865	0.397613009771606	0.000380046002534258	0.250048502225029	0.449549939765154	0.35575463831401	0.578599530849487
2008042	15	1.15691897097677	0.462801502488709	0.0478690621667364	0.135580203868332	1.65168681380928	0.194471396677388	0.450487889029821	2.4160197557058	0.375222196646927	0.322179185602415	0.766341791172061	0.192174565313428	1.04620768449281	0.397930917354924	0.000249043614815883	0.226014795692733	0.475545943230446	0.358149216503259	0.539117778347051
2008042	16	1.82463971028719	0.389324128280313	0.0414930975998879	0.13785796814766	1.6823219958216	0.176930928300168	0.493197769978631	2.47436943332157	0.369591464351698	0.299944520819603	0.73008028453365	0.173519907699274	1.11192622152439	0.41004029648975	0.000139675954013792	0.203707885187841	0.545654414840176	0.358162529617992	0.50616331137652
2008042	17	2.23704782727089	0.343650559065268	0.0367756245209218	0.142338819487373	1.70849014221479	0.161032047921463	0.477136993523242	2.42943897206873	0.363453485870471	0.26917809282921	0.699228816584995	0.164769769893582	1.18820611242442	0.437547804617359	6.48284082432494e-05	0.182107939045995	0.674755437431872	0.379097407324441	0.45969864639627
2008042	18	2.30245927700388	0.311409288180111	0.0342968293079549	0.14834226245455	1.73352507428861	0.145614332523857	0.431051102228616	2.14853083901873	0.352135307602954	0.24730174666413	0.690410760349224	0.160516116531491	1.27763676412484	0.475432345424601	2.65637409772461e-05	0.159554673762898	0.782196646838838	0.392165661396377	0.420667248340537
2008042	19	2.28662578491624	0.288079834940171	0.0335187690470425	0.155825450330733	1.74411494746018	0.130206457205752	0.427138177467734	1.76178612993128	0.333968413844308	0.245802496263284	0.709445149200778	0.158739562068548	1.331413677988	0.512164790354555	1.17760684080299e-05	0.138479142650979	0.813415277014087	0.41628862324842	0.385354755935408
2008042	20	2.24585771255436	0.270488559977842	0.0330236166997522	0.164154365799257	1.70008516286785	0.116022893751393	0.417487991194678	1.4385883453736	0.321365273959561	0.235683873017604	0.738953580054611	0.156480445051203	1.39709082462786	0.556171753213521	6.61942302665668e-06	0.12149411897504	0.758229507750405	0.462543977106062	0.353461217322916
2008042	21	2.29138121602616	0.255327884857988	0.0324033936655791	0.169648916929319	1.60502282388373	0.104049985844224	0.405333972900822	1.3491267905924	0.328906770011996	0.23064257101873	0.765326601781371	0.155354270604969	1.40464455321468	0.599246003533892	4.6771495456767e-06	0.110007069147051	0.709839683568894	0.554087871837843	0.331780286175757
2008042	22	2.33423642388519	0.240647071673033	0.0318425539805804	0.170264417181558	1.38100143018473	0.0946048948686814	0.381462950073527	1.35794183512065	0.350814106498001	0.242933486818579	0.774375112920365	0.153964203173608	1.31519888915637	0.62995300830721	3.76639451742417e-06	0.102979991898311	0.691984382276475	0.73690364303229	0.316615821829079
2008042	23	2.34861341558103	0.228037557468224	0.03139963018109	0.168343030914844	1.02012419116753	0.0883608027198556	0.358414980503489	1.38790680703768	0.382756417692335	0.269651353016977	0.770682820793426	0.152604423961606	1.20211540219995	0.654899144629323	3.24155521143225e-06	0.0997623218152422	0.673990884149071	0.964791256296681	0.30305343816115
2008043	0	2.31382360836833	0.220660707504989	0.0311708603313515	0.166704894843203	0.776527462945311	0.086262168989167	0.338860009620957	1.45521064227852	0.413237971064342	0.301990766411779	0.769934989762161	0.15084835887303	1.12867790235565	0.660380081651411	2.82697844352536e-06	0.0993791830186331	0.664680227768048	1.15259049073908	0.292243585242352
2008043	1	2.2585233080465	0.215283677805835	0.0311991250038795	0.166852397764519	0.704189597071461	0.0890081755830335	0.322342898823939	1.53646468826797	0.436847170527282	0.340797952406737	0.77878101364926	0.148489444741736	1.05282785678069	0.64898405897277	2.50247990323896e-06	0.0994271925598663	0.677862819452336	1.21748337787255	0.284366485929614
2008043	2	2.18816585403158	0.210034032762105	0.0314770887661734	0.168907494236392	0.690440207645055	0.0943427039514748	0.309368984222992	1.56057995964426	0.456355198102387	0.387813439690891	0.805120868161588	0.14585209763497	1.00780135706201	0.6326766318418	2.22879125627966e-06	0.0991648373857993	0.676211374859017	1.28059676321528	0.276100287298065
2008043	3	2.08459423317975	0.20578978521758	0.032118205932734	0.173885446500474	0.688873707142508	0.0996563366982849	0.299017075712324	1.42274114829243	0.479224447736027	0.418051551023069	0.841120741111597	0.143288974103841	0.929987485115102	0.616637556354657	1.93256848829182e-06	0.0987244263845604	0.662261401330164	1.30845610810104	0.270009884259706
2008043	4	1.93402212035361	0.202695784982739	0.0331672956542663	0.187455645476191	0.691081118902202	0.103077735788398	0.291760528672477	1.22786711389859	0.511881665574837	0.449096887390527	0.875613977333379	0.138456253094548	0.802068392568851	0.606323383104579	1.68439437670053e-06	0.0977282756405027	0.637945118491617	1.26829333942503	0.270121252902901
2008043	5	1.71272175125735	0.205765945892818	0.0346640701923685	0.222553254686622	0.692403782647798	0.103872791228587	0.288671206142869	1.06418103173392	0.538405889890575	0.487865333161873	0.90500122366475	0.135598953364308	0.679481619583172	0.602588467795652	1.59618696509934e-06	0.0945191396098922	0.595001140923328	1.08848070250517	0.274878616354983
2008043	6	1.50842465220514	0.218987811817811	0.036533618799431	0.30969277129428	0.690315801821703	0.102074937133366	0.294421118959734	0.995960233936449	0.551662570541364	0.520875719740048	0.917618852810981	0.138135611321124	0.588109404298491	0.602312465374934	1.6029814732683e-06	0.0878954665805526	0.54756991825715	0.89851984122823	0.27685333531885
2008043	7	1.38349502687518	0.241505610671102	0.0386468988469172	0.444461653032347	0.686484876317025	0.0984544463589742	0.460555281006261	0.951300044296977	0.556817180655293	0.594069280850984	0.894518337610867	0.144616734483331	0.510264163143474	0.6040236446231	1.61303188564882e-06	0.0794977530996945	0.508811006219206	0.765931704617416	0.279447263236429
2008043	8	1.2838336277618	0.269252082479494	0.040628177630934	0.578998484739268	0.68117384504329	0.0943672047278074	0.775105465054981	0.88663709599968	0.542684120670905	0.645217722732542	0.876232920183353	0.157851617431926	0.459892523287591	0.604987501417835	1.99129111981793e-06	0.0718213309169295	0.470171864931171	0.667295739756254	0.2845481272304
2008043	9	1.21439377284647	0.293217105910817	0.0638562239120917	0.860779459245174	0.675529012349055	0.101634068208285	0.968295932158869	0.829596961685424	0.540304810117004	0.753866049285058	0.885393934854628	0.179553896020611	0.433674402439827	0.595545648794072	5.67420280243436e-06	0.0651940680966611	0.448212496129063	0.61882631024066	0.325009369599838
2008043	10	1.17797355284246	0.32444014599223	0.0862338661918182	0.778324903104658	0.666389901140696	0.156361679304503	0.853523803633704	0.850604942960208	0.598161918461339	0.817314748492981	1.00506554501945	0.195917868382903	0.368430826172441	0.943862153153622	6.59841960227489e-06	0.0592823491940026	0.438193659214706	0.627914268450905	0.443494770175338
2008043	11	1.17713211114462	0.553520347502283	0.123556081809847	0.697268703264931	0.65691117832655	0.208849492524471	0.663828801729407	0.909726369925121	0.740193600540178	0.845738253688024	1.23464485883309	0.218852383382504	0.326509318653669	0.89280695329303	8.9417636721243e-06	0.0565942097315596	0.424847183274966	0.659008912573593	0.571732264411536
2008043	12	1.19266126393235	1.0553878500211	0.139170667824972	0.594092580470114	0.646501485889601	0.219453896830209	0.496099657213846	0.959075124265859	0.938946436654391	0.879195522650729	1.91658944648898	0.251410564187311	0.259997481906177	0.823156904660979	1.55858712911289e-05	0.0578971089626568	0.427497141967963	0.68703680335231	0.744472882168999
2008043	13	1.2347792034484	0.925747543763436	0.13313181998356	0.470062564049299	0.640151712362687	0.265201106674023	0.413314505732572	1.00357427276839	0.964099607033236	0.907170978816353	3.38466663889006	0.271032364074866	0.211447619346027	0.732860546189221	1.67830041889483e-05	0.0533606730062639	0.416366819798499	0.685461426973166	0.582999451918614
2008043	14	1.29755823860805	0.849599907172991	0.117631328815678	0.360576771730809	0.634643361715841	0.244091952473038	0.370481040583009	1.05083666901781	0.864492289266661	0.932148786404561	4.09128978827833	0.295407914464142	0.179998816323995	0.662291019764852	1.61124861033973e-05	0.0473838278704445	0.394503778799574	0.711127089757483	0.536492739596253
2008043	15	1.36243459583924	0.810331815714457	0.105509427819554	0.290395261939953	0.636647243206745	0.234726397629142	0.348964257273529	1.10930439728811	0.776978240454826	0.952274206007033	3.73091493719281	0.358628960072192	0.194620603104382	0.603524697739626	1.42307611140737e-05	0.0408580280808695	0.401271458855534	0.728503883515272	0.439464833833764
2008043	16	1.44110576523862	0.784386307945506	0.0929270107818276	0.248057397677852	0.64606903648266	0.229314908003913	0.34899579241173	1.18457081925364	0.737163415169288	0.973714007074041	2.87898276509224	0.36613775235916	0.220935261559853	0.569479508109961	1.23342396190275e-05	0.0337133914823356	0.448470351740809	0.716335766969976	0.372436721247958
2008043	17	1.54232489249519	0.745135182882258	0.0761015445216697	0.21427848860695	0.663287074117536	0.211047241061034	0.382660713400858	1.25501027631147	0.743637338913711	1.08609076316202	1.55284983854508	0.385342676710716	0.254074900429949	0.531758064047054	1.03879311746668e-05	0.0267014154810418	0.51703051318578	0.674830773361675	0.326179020028427
2008043	18	1.63485220900403	0.678031067115308	0.0635844217923207	0.189718167925587	0.676857080165007	0.192456028066376	0.407478494964656	1.22545397394043	0.759629289833403	1.02888043333052	0.934274749455912	0.37433941050421	0.352417795611936	0.493192649260297	8.69025121811753e-06	0.0203309259705909	0.568008705342944	0.605986865505908	0.282273174802752
2008043	19	1.67205556667204	0.624554744072548	0.0548027450529025	0.184185175648446	0.683682658996167	0.176973449967204	0.392765611141523	1.23346739911632	0.703861481961344	1.10962914866696	0.685418189199201	0.394260387690089	0.491489436384909	0.464799915808325	9.27714069446218e-06	0.0146425501344013	0.601644573306322	0.605405687386649	0.260295949415579
2008043	20	1.60055628173509	0.575286466716989	0.0484697634827793	0.188991940829734	0.677107510625144	0.164030368365651	0.367662999192184	1.2066204589886	0.637661024855346	1.23856881966679	0.517924130374832	0.410143062640936	0.481371886270082	0.442543688335987	8.31822939306431e-06	0.0102472707032902	0.611808755698325	0.666323062108987	0.248577203806274
2008043	21	1.42972848243189	0.532512854993106	0.0437444183089533	0.198673306269947	0.649008236038278	0.152865304772834	0.373297944968311	1.03991045176007	0.662988713314515	1.38143264660448	0.357585046261045	0.404850264588452	0.407672584864789	0.418917072984007	2.30738049810467e-05	0.00758599617418464	0.60148656389674	0.746376137127731	0.238877086161719
2008043	22	1.20145331763327	0.493966213466037	0.0402979517551687	0.219105526814324	0.613866468588141	0.143429647181141	0.472413536455488	0.8689010682816	0.790557781333105	1.43646865836793	0.322172361561358	0.39625932863262	0.327387063774575	0.388410225760838	0.000389941797909045	0.00608604086416287	0.563594999571055	0.926298005702763	0.239170963640643
2008043	23	1.02562824436129	0.460750998938522	0.037665203570052	0.228663898451829	0.618052338156311	0.135656527286301	0.616083950647107	0.81819584064962	0.931771389563783	1.39050509078657	0.487808083411343	0.409056683081781	0.2900672987083	0.341930266960483	0.00509273435245486	0.00540856820032094	0.471151472324498	1.35844187271968	0.259981159227685
2008044	0	0.912854470395493	0.428328688686695	0.0357340684484886	0.222860946828697	0.688321049696016	0.129437034606032	0.707883023753374	0.774191550679413	1.10911972908757	1.29784358406882	0.576053286787573	0.745803349970585	0.255003764297527	0.268719088609081	0.0187141745380299	0.00520393665436895	0.428258863188493	1.83719719506684	0.308564493565179
2008044	1	0.852495520104586	0.397450411136343	0.0344981934878085	0.216953718633695	0.588184464999256	0.124802180547207	0.755928218496408	0.715596191987287	1.52610165527089	1.18420093353627	0.591761025815059	1.06357797197046	0.22814537181178	0.187547073452366	0.0384365144381526	0.00513768268091527	0.419285214361475	1.87965846331832	0.367419173712181
2008044	2	0.844042012536509	0.366888375654816	0.0338039696765258	0.212707169046397	0.589073457350352	0.120629714672805	0.772074572653159	0.712394726768872	2.04237782219078	1.14486616497342	0.614843379911877	1.41342440604428	0.226828356599477	0.119951268215047	0.0668109893074666	0.00511217117753413	0.36361630083391	1.65829118764642	0.410547877152709
2008044	3	0.872707035609237	0.337026384127396	0.0335639830157553	0.21027676842083	0.624318791823255	0.116104280430927	0.728923894292497	0.729151266041915	2.21629745240018	1.18302910129131	0.643401705177755	1.3083553001724	0.228661495969902	0.081643901269417	0.0978556459462756	0.00531580623161382	0.321727468802653	1.48428951946939	0.435761375419631
2008044	4	0.909568428346469	0.314592846084435	0.033703468807343	0.209823374662931	0.662224766712059	0.111872465845396	0.652761716483993	0.734370071604227	1.28364893534743	1.26202703606164	0.570298030298076	0.816596273226948	0.273318617475676	0.0677709620193761	0.125252912417826	0.00602186787718597	0.330406971002986	1.49159870560395	0.444290273013261
2008044	5	0.946675971992747	0.295382823795789	0.0343259110449182	0.21315191682351	0.650705277347572	0.107649575353309	0.581951535902449	0.787921354608847	1.10983948559645	1.32318751853563	0.414910825391949	0.380946106189137	0.296934216345096	0.063275944151573	0.17901072364373	0.00738773379247027	0.504255768791235	1.64840280178842	0.442106028377467
2008044	6	0.963843605643503	0.275836038718723	0.0352974359416663	0.217225435885286	0.612007168832283	0.103313434240611	0.596837419818076	0.865653221342349	1.09695361750918	1.301863048177	0.328084046428921	0.25174022268925	0.284704662993104	0.0618732307493203	0.223640952473285	0.0096361891288251	0.546007336348318	1.68874633795863	0.433192403621515
2008044	7	0.936811667624503	0.255862222440127	0.0362913172470586	0.216092152852515	0.584364336166141	0.0989021515520141	0.63868633652498	0.973238833685953	1.23981032329006	1.15366937243905	0.313397237709637	0.244361416699128	0.245389836437944	0.0613965998582018	0.211998212233133	0.0130663533765822	0.483874174833366	1.61843311598	0.419933049661268
2008044	8	0.87756642774496	0.282727521080776	0.0370498900622967	0.261223242310995	0.565682961671415	0.0940555121525175	0.657720138813309	1.04771330795525	1.40412583148277	0.978978696914354	0.42820531583168	0.233609819244155	0.270930771506073	0.0616983913575803	0.230050630799992	0.0178966515522493	0.322773125973703	1.72795321299519	0.405231264113214
2008044	9	0.847959533556217	0.38520120947926	0.0460301460918288	0.629542242503946	0.540478041204965	0.125437408374549	0.769704999626009	1.08152762536029	1.36014631164637	1.04448533394482	0.454503551421671	0.196611371422055	0.308767511396725	0.0633552084704527	0.237355227494294	0.0229051156078946	0.337427609448347	1.95739806862151	0.406095176020229
2008044	10	0.856528261347344	0.560567629221078	0.0484680903382399	0.503856424634107	0.594179374088196	0.143077442328038	1.01084516106804	1.10291812684703	1.19525925401969	1.29991433600989	0.738977201260073	0.144427899936372	0.306989872348335	0.0655658605392032	0.262488954560403	0.026928504877164	0.450060500171487	2.01442331542459	0.547484450402513
2008044	11	0.892878940685461	0.5253090089931	0.0586713948931541	0.40675233051672	0.698811833138801	0.154521598668469	1.17101696593114	1.12707399199464	1.08579482880869	2.05335814816922	1.39546463811215	0.158933232370305	0.522879546359474	0.0673807223238371	0.266614988042524	0.0433817666793845	0.574098837937203	1.73542681844586	0.612538284156126
2008044	12	0.930063379449095	0.463261820489481	0.0704856219303608	0.341882043028324	0.806984162373681	0.145327616009783	1.19554079808787	1.13864663170831	1.08566952337548	2.81554962793	1.62860632127863	0.230846918971087	1.03780087866435	0.0687710225612392	0.244559962652811	0.0443808807601848	0.697036438415247	1.30870838572332	0.596100022279834
2008044	13	0.925715245292196	0.409440738888614	0.0719739163842935	0.373781203839907	0.885413464185618	0.142070009554442	1.02902846995277	1.09651362129622	1.25368186169832	2.7726065010145	2.06328820136588	0.356682576293595	1.01294724989598	0.0804822995438935	0.200443325469316	0.0431121814230844	0.858166893130578	0.849291055357462	0.57846489000927
2008044	14	0.902247194599938	0.359985354328919	0.0723932853956852	0.338387008583277	0.907737939301172	0.176348315060609	0.875074161266535	1.0229012841934	1.32166262959453	2.36124601253125	3.36911517618895	0.727569646163213	0.875046060859729	0.0799485607455036	0.15899175857856	0.040330858807694	0.851351414201875	0.568075045777604	0.483722054060483
2008044	15	0.909410123109336	0.32184047762238	0.0702763272238959	0.260120863138136	0.904064737800159	0.212675574337728	0.728541474159607	0.994117190160407	1.2403704989894	2.22608987564458	4.40753128452395	0.738642354174544	0.687912397949075	0.0846872145586716	0.132178795619777	0.0309208022614594	0.830913217220924	0.427386859634605	0.430808276551398
2008044	16	1.03524949638919	0.299723247480536	0.0650050234378537	0.265094842314834	0.875427586403467	0.237220492946542	0.707448100648344	1.04921354093541	0.866270097127164	1.85423202295296	3.78543649079019	0.975527073878716	0.476094639674201	0.0918759015288564	0.104030776222676	0.0183873740591129	0.791367563996361	0.369071536705489	0.398619316758408
2008044	17	1.72190661627485	0.3019588267715	0.0585162293357645	0.261270338266039	0.848745312798681	0.253669556397234	0.623905086404381	1.15057334941874	0.430227730035512	1.42402948224263	4.00148927250641	0.968791960564886	0.380418134099826	0.0994666931073052	0.107859558143657	0.0108033254917872	0.675668393499568	0.339201379934555	0.371356716172963
2008044	18	2.46814566373999	0.291793268252895	0.0539109959073258	0.222474176170178	0.855303986075365	0.257195177135221	0.568501035915742	1.26794132317492	0.26666151112255	1.34496052585167	4.45856063842034	0.726567643078236	0.346386831863497	0.108669012779672	0.118144388465431	0.0135452803138606	0.528552113542092	0.296343476039565	0.336856773896689
2008044	19	2.64450943787938	0.296801674916807	0.050725370564817	0.202985023315763	0.806319100858643	0.260958742134854	0.542480669095327	1.37814264504299	0.218392497551957	1.11930788047706	4.85463452553073	0.833162081081424	0.429906432924458	0.132210055341285	0.111673291962969	0.0181768162151738	0.437019957675991	0.269248555733208	0.317266249970874
2008044	20	2.59676319378902	0.305105724764483	0.0482053584753317	0.187887827483775	0.715877191777975	0.270791808689336	0.582479109885539	1.46698617508825	0.227976746332868	0.867038296807182	4.84798902975395	0.970268638331556	0.960548449054504	0.168031165976272	0.0924477060408645	0.0211066692560453	0.463241490886656	0.245816860817001	0.305418193662819
2008044	21	2.59236308889513	0.306912318953317	0.0457380228135275	0.17829740900225	0.529201820498558	0.254320625001193	0.756570954806407	1.5089120720816	0.287670236815731	0.689639095582602	4.74994016846905	0.914029046455644	1.43139538499365	0.18446386778224	0.0724214232566652	0.024966857007889	0.520093472841822	0.226869189964235	0.298706715038463
2008044	22	2.56428925518132	0.305973758848406	0.0433036042058201	0.174536634629605	0.454626253332746	0.241955362254002	0.898280999945676	1.40738829743234	0.297886891268334	0.671640548945025	4.80474798489381	0.894302004366279	1.00069617709193	0.205902968832755	0.0583862379364846	0.0395931465654321	0.625002880917709	0.222660171353103	0.296175927959245
2008044	23	2.67731324607924	0.306193887669664	0.0409769641990838	0.179460621782132	0.465885338055642	0.242761807597612	0.825112169186486	1.19529123400205	0.29704863667902	0.628748768115446	5.45010613839234	1.22752107083788	0.512355961703154	0.226540661190403	0.0535006692386332	0.0955203788639386	0.860745196671509	0.226518642608135	0.296890260940674
2008045	0	2.72101325031173	0.308133064194837	0.03911756673928	0.187736037644774	0.479793645701757	0.243572965747136	0.651246515653115	0.809122106901203	0.325591979126706	0.606198357255519	5.53623600017943	1.30615785326617	0.369220228862644	0.238421263190204	0.0558522562693899	0.188626591540188	1.33929211263126	0.231685677846015	0.29952469088736
2008045	1	2.36135291377958	0.308196982493683	0.0381815117528702	0.202797124502826	0.474408096061301	0.240779314510565	0.407275199577325	0.568195451359308	0.356040410661011	0.607787400298434	5.45169225127053	1.1153054516858	0.544326585405083	0.237689249304093	0.056964351556001	0.179928333749172	1.9755877925019	0.26318505430414	0.302253126746745
2008045	2	1.87148942174682	0.303302671253985	0.0382708004826484	0.256023379519352	0.508923703155291	0.238753407997609	0.292355398827534	0.476830001553871	0.38279654971879	0.595996751631772	6.82247081371211	0.971900475955836	0.739545167755801	0.230264723020168	0.0559486364962801	0.204461033079346	2.69504462615499	0.326415695301852	0.30306601933736
2008045	3	1.70273262633244	0.285389476419664	0.0389862237060161	0.323753098970524	0.55789238345191	0.235452368781663	0.27647008444723	0.473618752259503	0.415134718268692	0.544247448266276	7.31965368575146	0.907507788916549	0.840360470022552	0.223944826161441	0.0466678354754176	0.194403719001118	2.8135280153744	0.369302963597472	0.30222368079359
2008045	4	1.70587675962078	0.264579903281772	0.0402084673103757	0.440699439782102	0.610810093967273	0.227863287172721	0.31894726171735	0.489447726315277	0.423458316678746	0.436052659771131	6.8808488942778	0.906791023484259	0.728027209958295	0.221293916637424	0.0684486075634667	0.17739453211062	2.44408403877564	0.383931715277026	0.300173940494467
2008045	5	1.71276168318638	0.241379939353802	0.0415006657488955	0.468238628092763	0.646458714248333	0.218275226826469	0.334570881568617	0.492363197698574	0.427291871199873	0.332703721039316	6.09477941318949	0.916543278166328	0.606684614550161	0.219951710625903	0.173525734349397	0.159739192708083	1.62646722687839	0.406971240155575	0.297361418426783
2008045	6	1.61799593823215	0.217966154949383	0.0425765395830269	0.388070384102856	0.691480412470104	0.206352600918142	0.349564760588077	0.510930980900415	0.445558675005943	0.281965057029629	5.67584705103368	0.933715633721453	0.547972021470771	0.216727368378711	0.299566292995265	0.167152134133435	1.33541399613177	0.422470240637997	0.295668859849835
2008045	7	1.46489266851876	0.20312679942539	0.043562302359374	0.315580919762369	0.782405594691871	0.249427745875639	0.36353182018088	0.556326093980669	0.4395462590236	0.289371115582086	5.00112850480247	0.829978410395013	0.526660302330815	0.209449997937793	0.403867197481611	0.186341868363141	1.47056950532809	0.496499879913029	0.296558081061333
2008045	8	1.00124915988643	0.200343894586794	0.0446700278645422	0.275381395258441	0.858280356183297	0.234041087626059	0.390014069431392	0.619531388110855	0.452009270078633	0.34231713594804	4.55810510642752	0.693425620171541	0.546048947463928	0.199737382065804	0.523346901248713	0.202279651597952	1.57926740781419	0.587793582116386	0.302017286989281
2008045	9	0.738987945587043	0.35877002241354	0.0457132964252446	0.219946550705566	0.904821320994202	0.21254393234196	0.419680287871216	0.665017470870195	0.486175708032827	0.368259398348992	4.31863451178676	0.653360858269581	0.568022187127347	0.192821371774281	0.512680860087068	0.207416059384414	1.60164326427619	0.731425720316911	0.309380535511681
2008045	10	0.66502411499827	0.524446612888321	0.0447693255524665	0.221646481450187	0.93542011598746	0.185032612888066	0.447195400935502	0.693557693227045	0.565696764660387	0.382645657961289	4.22944963661338	0.661640824852988	0.587717054710104	0.189744952632318	0.445944016484701	0.203391850460593	1.58577717497671	0.884259657952515	0.317505266154205
2008045	11	0.663704641622658	0.412245198196181	0.113978282377189	0.299263461179882	0.967822043782929	0.174135816169214	0.472060487404424	0.713182767171718	0.675973440303563	0.396594562296994	4.32276179584461	0.663465747794835	0.606631993581554	0.189754113805525	0.401298266565323	0.197280607181086	1.53145244420282	1.02164186333404	0.327500536131868
2008045	12	0.610274876318203	0.301064363183809	0.157487418928356	0.363674485538244	0.981962451242798	0.216857630321125	0.473525649136976	0.727651864775552	0.798800974498627	0.411880469976257	4.49075013407264	0.67254723701035	0.630050808655087	0.192091076509077	0.509597674572682	0.179527502688489	1.40630704367456	1.08548879115858	0.332334904232209
2008045	13	0.572656176162063	0.273125801342485	0.138612552945642	0.381004287872087	0.955206618830903	0.214937829461872	0.446969728845352	0.722819739912365	0.895174591765614	0.402848106110389	4.60354848694671	0.691420798287792	0.60341091849224	0.35198516885517	0.589989149464019	0.149633848561023	1.43287666677028	1.20740163508195	0.650148250485867
2008045	14	0.573399483613161	0.259824951197449	0.124226038894104	0.393266167786498	0.894665366365777	0.217839992173796	0.421925045583057	0.70833415741132	0.969707500044103	0.382039030432766	4.64890478744192	0.581930486363666	0.541689756252484	0.377678937598628	0.572299209239823	0.141729465340623	1.44374827603658	1.45248582202714	0.848606677623076
2008045	15	0.598472996819586	0.207320410367931	0.110112505268589	0.40072739783156	0.79004220345713	0.285366591466338	0.401068614001669	0.707527313614966	1.22656796548083	0.36202702778771	4.55213719008303	0.444174687470598	0.507128230021012	0.358890758192075	0.520307466996343	0.143297757874448	1.76503383528235	1.27105713970882	0.850226297465158
2008045	16	0.631782797285991	0.174659366414905	0.0942751938211414	0.402327672236918	0.634191379753139	0.26387513701758	0.362917814653531	0.696108317110352	1.28324609864899	0.340746691402311	4.12862721453322	0.672598986652572	0.574506499822221	0.338785017169071	0.497563876606186	0.136473982523178	2.59268060023247	1.07032123038178	0.796486669132058
2008045	17	0.6720037319723	0.161312589329546	0.078310574100592	0.398881482557649	0.50588063861966	0.191537356821558	0.352967084057817	0.660805655945779	1.16589377239096	0.323003440881722	4.03384328788594	0.660902869971444	0.703395378182036	0.329611007440445	0.462591899653419	0.114721215291639	2.68855493451258	1.05567204916276	0.709237406609055
2008045	18	0.691295802255325	0.147806368089422	0.0671582209296	0.383826000533729	0.452610267597175	0.133063346887974	0.388884787447725	0.621249468868553	1.1711859207385	0.309902441863053	3.98854985113144	0.462340755360859	0.834173950544476	0.366364956627975	0.44489204767792	0.123106970864755	2.41557428783359	1.14375669541917	0.651007105724137
2008045	19	0.701702702849332	0.152493186889709	0.0592677030886502	0.343111193707642	0.433561184182816	0.120532300040036	0.432819910172091	0.591047705282891	1.29543329447306	0.297537576511974	3.74091377620752	0.334027904651354	0.967471874712211	0.532687801251836	0.550159416008196	0.193403489923986	2.09395614401572	1.14081517654911	0.611923849713834
2008045	20	0.713561019295994	0.184592931082254	0.0535236168189083	0.297077328728833	0.437468763722386	0.153543938863099	0.522689496741341	0.574895099737929	1.40943981546379	0.287536271203931	3.04405625896881	0.270729601417487	1.01065029765109	0.828789954210926	0.713678410976289	0.23051670011514	1.97989372520369	1.04817620123037	0.588938844440922
2008045	21	0.716763584495852	0.228796080442809	0.049025079278686	0.25828481618471	0.45995234828271	0.201166667262858	0.64597079162546	0.568187287255675	1.40065678025029	0.301863667670435	2.38710583382955	0.230668436790178	1.04968760944419	0.75590950954968	0.826805323497968	0.247906476800431	1.81614075098607	0.829373294542639	0.610057437332955
2008045	22	0.688666272495505	0.252685596717508	0.045375007414501	0.239023920598129	0.528361386649819	0.235735975195026	0.779314656783441	0.54367286705816	1.2078784543598	0.416261493331885	1.69357446443009	0.228161965886937	1.00159910780784	0.671453004723863	0.977547478737298	0.26920407801634	1.76071539503429	0.676743373908359	0.690257083666514
2008045	23	0.645860513832846	0.259607839706022	0.0427415536811043	0.24015263806305	0.601645448264947	0.245090627389737	0.845175448426093	0.528850558907495	0.954547907315366	0.596361740478207	1.36423260665734	0.256019216060626	0.920807038916675	0.622728251650277	1.17234456421067	0.27314159354711	1.89000525919349	0.606948741219373	0.81242832788122
2008046	0	0.658016105340859	0.265064017427039	0.0412707794529166	0.259624385764922	0.8927669441213	0.246277131234772	0.891401737447034	0.567420470323141	0.867891354595368	0.664406505679147	1.14672688139115	0.269431224819155	0.783287901136772	0.622757278829783	1.22794477625772	0.264042531250562	2.06768006838812	0.544425070754807	0.988054982760143
2008046	1	0.694219119386668	0.253528295737202	0.0405103853460804	0.276829226040364	1.40476544695469	0.217087872888994	0.847710824042568	0.698717772392399	0.801039349911939	0.700339445689009	1.17281157659062	0.285450967889273	0.686774596416236	0.637538582963864	1.28616659600971	0.249397698542581	2.39405303236011	0.522910831014548	1.17905331367554
2008046	2	0.72261463898823	0.240931234462943	0.0399003866068007	0.374379053188586	1.46136316187688	0.17882956500741	0.730983255445404	1.10563560010815	0.824357721512756	0.69121747125968	1.47216656302956	0.28773566483518	0.587219078804594	0.654568980179391	1.21200966051758	0.206739064277771	2.7031112853377	0.555338324520684	0.995545720874066
2008046	3	0.753395091967061	0.239193197412181	0.039068489522259	0.411268441716529	1.29892508263956	0.178704547697597	0.724708767704079	1.44820352657943	0.841301965217071	0.736087425229854	1.59449117747292	0.253761309814021	0.512181408537778	0.66352858859165	1.03610321988464	0.155154063618746	3.13034352972093	0.621320165716204	0.600142092120863
2008046	4	0.780920114275784	0.260341494491175	0.0378484107276676	0.489516733393422	1.11341942525037	0.200535003994442	0.625921423593383	1.49411620827764	0.847629621136918	0.683579411004622	1.21391804063719	0.214156802209581	0.485200253316155	0.674682625024397	0.946080064472525	0.153544328363751	3.24957935620976	0.703049087749353	0.34912252329373
2008046	5	0.903153938122045	0.268679138168816	0.0362930467048315	0.697318452059708	1.06146944325432	0.270905171755729	0.586351579040307	1.16898202464498	0.925289221142583	0.640155493580286	0.876386149648656	0.199948434134592	0.489779087016179	0.691877352728141	0.968008702317102	0.283966283532067	3.382900889787	0.988417003531291	0.27824806504033
2008046	6	1.15682802058281	0.278035240325408	0.0345430706758096	0.764521683869294	1.11040350580982	0.303183603643288	0.580378671447131	0.93712169773381	1.09399901967912	0.669606548806968	0.850064297834036	0.195911838865063	0.480618652422026	0.711214809089923	1.23339551946845	0.489915767868806	3.36137251816354	1.12168994995526	0.202435233739502
2008046	7	1.31525800708428	0.350821444935971	0.0326523581652488	0.655769036099761	1.10705390042457	0.26894560755356	0.589437592252287	0.895115654993756	1.33966417200334	0.681525973420651	0.89530256926687	0.200901108272773	0.502236926032906	0.73203815616173	1.12772811873947	0.507777198775198	3.14380397462817	1.22488609017039	0.200452869980303
2008046	8	1.35294022389313	0.466189631972654	0.0365451079567069	0.62447565701199	1.13966767051713	0.269632233347515	0.5894266107412	0.882778011431363	1.49551704034696	0.655309294602001	0.965109277083051	0.191829326439092	0.545741533949956	0.746940366825228	1.04746456601495	0.555773217313807	2.87298427984799	1.28500494805785	0.223507464015606
2008046	9	1.34370971505271	0.627411172009404	0.0474706812653175	0.76226635966668	1.21410249421045	0.471883266402537	0.668442524143645	0.820720604166751	1.66675763725649	0.71893928987766	0.979605177909959	0.183844886396114	0.66750846263272	0.755193369908017	1.06986026177067	0.727524109918342	2.64265890018393	1.36085406694222	0.165418886962319
2008046	10	1.24118851051694	0.747967075669844	0.0795055087705726	0.788720762319533	1.26377601291383	0.76641637757944	0.64059825823941	0.871630491781238	1.86583080593312	0.708358075786108	0.957211872795126	0.174528536567485	0.958135724392192	0.737914170544755	0.640813478925667	0.73768377964544	2.4789508640627	1.52879255363809	0.178229165603915
2008046	11	1.12690387715127	0.7529129126047	0.185251375145535	0.695509633875898	1.33548895357744	0.805751537012901	0.753540873114984	0.944466349960205	1.96773985256028	0.677152793666698	0.940985143583371	0.180457931333687	1.15441267687731	0.652802999300878	0.76161353893577	0.601568755636351	2.46271969331712	2.22951956088465	0.152427479391353
2008046	12	1.03652430724412	0.678708259858488	0.254486118977876	0.590633298028956	1.43937754520753	0.70167112738156	0.855062589728828	1.05588866942202	1.995511034423	0.659346945396775	0.871747033063388	0.195764219518873	1.02398071824006	1.32862930634774	0.332756356224539	0.466701727628905	2.43952398557045	2.40981245114908	0.15905057327398
2008046	13	0.986860197163793	0.584533935554037	0.233236133232233	0.517841861439897	1.56020175570664	0.582031293069749	0.962396585923705	1.04638811147304	2.17615261131037	0.664884212512125	0.791680523323227	0.198199118218627	0.828983403262307	1.66970165748265	0.299655540007069	0.523615201608683	2.80449921377129	2.39345353932319	0.159211738924454
2008046	14	0.903565674823718	0.469288302840964	0.197389033570679	0.483738961867273	1.57324975303092	0.477479103137527	0.903221780655528	1.057383277355	2.285456722706	0.659849055143306	0.842219025028881	0.215339498427298	0.69912852769207	1.45490290006871	0.286330973575602	0.703327670487218	3.08786210086924	2.12196331619654	0.146962018264224
2008046	15	0.978267234698049	0.395401354060059	0.167822772934849	0.471464522470774	1.51180179089802	0.40644819647712	0.805617730543005	1.1006391345824	2.16616630786955	0.651732296986136	0.948844382893591	0.168151052465113	0.634181232611077	1.13182208414073	0.259967261507691	0.781208911669208	3.03878867365158	1.91185210750348	0.135305314499787
2008046	16	0.956184323354413	0.336598082639961	0.129863139193674	0.452683277794527	1.39431819369554	0.34572668026547	0.686698952883551	1.17687332618066	1.90038371787446	0.613485237860236	1.03647386184939	0.157628256092513	0.591430798641081	0.958347759411771	0.31751191288692	0.685438115642222	2.67693642141695	1.71901657894218	0.134604635881289
2008046	17	0.910359241415395	0.298744518035542	0.111659566833963	0.481317371294417	1.18023462975149	0.283114479339247	0.476748598158916	1.24945854065859	1.55541521460163	0.413204418912569	1.19262370854233	0.180821467286535	0.570886727608013	0.853149940713665	0.319429786757917	0.520377073359837	2.53544820599388	1.51147115823544	0.147261482943475
2008046	18	0.852814949514419	0.272214540688248	0.101933335589517	0.557779748811914	0.933017260623616	0.232495988060253	0.393234608667413	1.260325012158	1.23035868994453	0.364210571790599	1.38324859601448	0.130505575588603	0.566556017377122	0.783393095821717	0.301728275389584	0.424467054391777	2.30612788171157	1.40338448932182	0.167292142516895
2008046	19	0.816182404175184	0.266327624179548	0.0975020465492638	0.582162577058703	0.752618296648694	0.212278324942728	0.366601798522839	1.22627830800389	1.0950421601261	0.343805435164038	1.49464876808566	0.12261799638334	0.566365650965776	0.737035462479817	0.287610652352139	0.421986036909901	2.10113818069923	1.51777693701246	0.186323158673272
2008046	20	0.808987949876115	0.277031629012124	0.0955834356912719	0.587724009580282	0.602495680009255	0.213360537926656	0.346951924624492	1.13987761879539	1.08510597710942	0.332212172746197	1.52753570855841	0.12667485440201	0.557954438291984	0.702559980054022	0.395734402785761	0.439823958818691	1.90378822334798	1.60382462236818	0.216193456600792
2008046	21	0.847264149718532	0.313772551236415	0.0929624954872345	0.530033557738137	0.493176935049088	0.263818811360449	0.335863036727725	0.969323819227256	1.06892054257416	0.339532337031591	1.49706020422217	0.134006410860399	0.55418217078712	0.671166929533953	0.434421070572289	0.364849279613534	1.87661271237752	1.61459048827294	0.264109640211067
2008046	22	0.925296831898883	0.334204183054664	0.0887302761345628	0.457042340359843	0.449436631168049	0.323571612394929	0.330462543448974	0.75526282160785	0.984264497223966	0.389824371425164	1.48287709522656	0.12481813063971	0.558647584369156	0.637090584222517	0.179272879639861	0.263445364475033	1.89732057507257	1.55877453093427	0.289474491352068
2008046	23	1.02909611408896	0.340898750446769	0.0793579302185564	0.451194452262797	0.441773972269819	0.379061134276637	0.329970321096353	0.579084762253789	0.969282174421848	0.38521364905818	1.41805878852219	0.126362042688116	0.564680086310693	0.604359777382655	0.15384124044443	0.332360666505983	2.04163850302291	1.52270394820586	0.286132439901906
2008047	0	1.15289328375979	0.305205735217122	0.0703275377851525	0.332564014451714	0.532278147578619	0.389621054993865	0.33263525302402	0.508536798403903	1.03255054638723	0.388907417018795	1.44284543093336	0.136367400265729	0.577941828793165	0.58134711027016	0.172374559611874	0.601049162951781	2.12888929096311	1.50395093441063	0.279407612079209
2008047	1	1.26100147049253	0.276179850511854	0.0660057054716992	0.269710947802665	0.737855678686337	0.355248979924186	0.337706985706681	0.498668426568435	1.1423341874004	0.402641145686071	1.41340739212075	0.147214556900824	0.596785061336894	0.571192326193564	0.167996000415969	0.6811168172301	2.0354680361062	1.43471546903774	0.266268413664605
2008047	2	1.32049799142044	0.27663908210618	0.0663878254405262	0.230838593987035	0.905308122845476	0.376736418607103	0.345833267180199	0.499068342540539	1.12906155802424	0.411826690426089	1.36434432928516	0.135338347119556	0.61519910160188	0.570124742899023	0.142615580739263	0.722521831086742	1.93720812657709	1.41292221752954	0.249179549139187
2008047	3	1.3903624225683	0.286691669375981	0.0706233365114448	0.223308049171565	0.964967900591506	0.396486530925196	0.365494805473368	0.500399845893007	1.0852905797405	0.52318794581249	1.42755296719164	0.119457172312889	0.637513418153512	0.568260070636821	0.182510769124865	0.682938629928235	1.87602834287535	1.43243535582955	0.236482891749824
2008047	4	1.45256176482725	0.298831267612553	0.0748085117850637	0.247329879604822	0.959508697562268	0.350132007491906	0.380894087655415	0.499555210775589	1.18639335030909	0.51356476521432	1.44153235803769	0.126658481908325	0.674575009113748	0.55777603705503	0.280819822702869	0.680375094286817	1.83721035029463	1.57430610494722	0.226499750570503
2008047	5	1.48042587367069	0.327581791347069	0.0804364494547698	0.268813439478251	0.875205544493002	0.30114240913951	0.550221645848291	0.519788720951086	1.34975862617709	0.553670250153272	1.4118410556769	0.137262679016268	0.76508796627444	0.542850668337215	0.236648790507464	0.674132069380215	1.77162243046535	1.60545786024415	0.21929009836192
2008047	6	1.51736306978828	0.358449083693048	0.0901018529564027	0.284598360897659	0.702271598212674	0.272772752620443	0.607362702558127	0.539020744319862	1.32180445859264	0.613387319586915	1.33880396168489	0.130201993230135	0.828028921556228	0.517422233501043	0.202411266101411	0.575125385207143	1.67769855371081	1.57612293803073	0.212642050083655
2008047	7	1.54455805580184	0.356405358677535	0.100870183860765	0.269568019472841	0.569496312714256	0.252741894737483	0.631155419131104	0.607187639878536	1.26704667284666	0.629689380258985	1.20745300536698	0.129627031103779	0.835451429986191	0.487088938353114	0.219502330558987	0.487788469430961	1.57508704588259	1.53813327918722	0.206157378189702
2008047	8	1.55390716797106	0.332873610765974	0.113083895132129	0.290877584736113	0.462220539678485	0.254580188434273	0.911443563461869	0.726165468885911	1.24836990856478	0.806866310491789	1.02310839402483	0.144327630719525	0.84251279969843	0.462461959840362	0.324230410980593	0.563618622099884	1.49090712950749	1.45051052245419	0.201274192207914
2008047	9	1.55399910895921	0.408077859938284	0.118483186614266	0.287511746141595	0.440956843340055	0.313366645912714	1.08282966288297	0.809839781168223	1.25144249634943	0.936252799778428	0.741093513028584	0.155604807119722	0.860582764696983	0.442307286805	0.575591797590727	0.668117510823915	1.4194733329766	1.35649728219025	0.202962752283566
2008047	10	1.56858980641836	0.465021861864665	0.1140265103868	0.38455910798367	0.412677463573317	0.431381982360177	0.902313765530729	1.0791044723437	1.28644125973257	0.994128924199426	0.569984334365189	0.155386381143297	0.874033358606273	0.421061096499463	0.805374951746819	0.528587593626511	1.35001559874049	1.24952692315523	0.207455841937196
2008047	11	1.48842121251351	0.450547077929017	0.10414512235522	0.55661241255421	0.41615303437185	0.559125800371532	0.85711285028902	1.23256457926293	1.35278916721565	0.936493637739289	0.536375301515901	0.208695112284228	0.728839031590733	0.399575073364701	0.698803078989509	0.41776678638043	1.29224443752744	1.11943173553119	0.212759542745105
2008047	12	1.49807218075981	0.443739290296082	0.0908761691508745	0.560745961958736	0.408239149745441	0.596980833755758	0.888403520124539	1.23793190804005	1.41371625831444	0.785210275309209	0.572698017889977	0.363200465408958	0.568909683933019	0.388962243940439	0.384859438122958	0.339255407548482	1.24180817831407	1.40417304378401	0.208282438395087
2008047	13	1.40441620629106	0.373441702387441	0.0856304592569949	0.506420494910859	0.402434815841876	0.584291755105687	0.714824933730157	1.16849111143944	1.43853113539675	0.743561550131962	0.973995065674797	0.385657764751277	0.499110809283408	0.475664478825137	0.301467365225264	0.277146782250624	1.19111142694386	1.50218439666656	0.202753682667206
2008047	14	1.12186287839161	0.414552647658794	0.0834976553809778	0.451956590825027	0.395100412276996	0.541745091794374	0.637697615989974	1.20867731708681	1.21115104601729	0.746179642098973	1.46127348445136	0.572839398831373	0.461401192092154	0.467848498944754	0.28597175366661	0.226902728046849	1.13039098063587	1.60447071810221	0.195292956581029
2008047	15	0.910307757871015	0.397366100136062	0.0821611071651266	0.424673268573199	0.407210870710674	0.478106594758646	0.54269014266057	1.16342841489964	1.23025470658646	0.769005013867139	1.68725311372925	0.625383063445453	0.481900472351721	0.462555570038398	0.281933537628273	0.190836234987013	1.0638550285553	1.56785164558273	0.181369945165712
2008047	16	0.780049440015363	0.39528737097161	0.0799466292152451	0.389010538442949	0.479190593088871	0.414418900782729	0.541890974615826	0.961954001776222	1.24530640090119	0.788698944457639	1.81589609046683	0.747795890988866	0.537946855021702	0.440698896183933	0.249467522079591	0.178838758775363	0.986049637345237	1.53934894611082	0.166276560985944
2008047	17	0.665903413953775	0.260727626201433	0.0789096639564029	0.354775705607151	0.586836472090627	0.352149566402528	0.589174560631	0.725854566100999	1.18737416157918	0.795707145193697	1.8975083628374	0.476975966746429	0.620759968979496	0.428870130546585	0.241800952132061	0.146424374755796	0.88322277994291	1.61967003493333	0.150248023233314
2008047	18	0.622033529045506	0.221148803722889	0.0824552290663398	0.293921294458799	0.760726829635985	0.310480906921888	0.599575879298646	0.601914957700653	1.23694634725416	0.782726251576507	1.99232227090479	0.314583805999786	0.925501669876822	0.424904297632591	0.222983342326717	0.159128389576292	0.747090665371926	1.81269416505542	0.140578246434985
2008047	19	0.583316609005319	0.214160350761992	0.0890156253541514	0.260650152209951	0.817174867962539	0.282002910902586	0.584066588254526	0.566712492901834	1.36318200921024	0.792231682221019	1.74653018489333	0.452244441529445	1.15428621777223	0.421932241268668	0.19048701573165	0.11268429299162	0.650746969265789	1.96904719741786	0.133706713961314
2008047	20	0.548767633460616	0.223657075867541	0.0980536682064212	0.287933474623863	0.760384985017932	0.253397070296889	0.549522809645908	0.559704711915278	1.54467293182509	0.840634761742229	1.6252594657676	0.645088878795421	1.27929195040689	0.416915163661806	0.158653318374199	0.0982159258237679	0.606445182400619	2.13156138479586	0.131950369424222
2008047	21	0.534313974622329	0.210765684606446	0.104035339034471	0.26323720266421	0.632176669695596	0.218712913408701	0.536509035415509	0.548597308701086	1.54017862638481	1.04213046266498	1.62761239803133	0.829683901118232	1.31790109056308	0.410082202042769	0.140588018305177	0.10044018446684	0.574387912162033	2.50154845368504	0.133523377639983
2008047	22	0.54501652600538	0.201179937448281	0.105326391868695	0.262609321075784	0.556681371448324	0.18659933582069	0.550408940474195	0.53984321835159	1.65773705693302	1.3248020514787	1.80468536131434	0.892214885342159	1.30056315655854	0.401362200780127	0.135466493523767	0.105950458440658	0.584401443452353	3.28562327304925	0.138378660172453
2008047	23	0.572845720829875	0.209927557879104	0.106428321447685	0.264083034592695	0.505317792169274	0.174131916528192	0.622190095764214	0.529744541770476	1.86608219359054	1.54538647170615	1.6998117398593	1.0347503803213	1.29070754925554	0.394973044853984	0.133948594511966	0.112233911501525	0.659067991057653	3.90441037626968	0.147067358313534
2008048	0	0.956841973335998	0.200109785155497	0.106857456404957	0.25738084865686	0.478148679592251	0.177569326173389	0.491733342690151	0.481732742981883	2.04658897278064	1.81360455247398	1.55630932425228	1.09895766876596	1.35925694654873	0.388288875810933	0.137796929177457	0.114045636754044	0.757502375385706	4.23315686527423	0.166015734119763
2008048	1	1.44214676074284	0.20416480975579	0.106334486857649	0.252647954569273	0.434935343485092	0.17698845347084	0.724282065910186	0.52446827152564	2.27436317763974	2.13849793356736	1.40067688073737	1.06508267972958	1.33045471344329	0.398782913463998	0.149729870636695	0.111085460063256	0.936367404881862	4.40811973913851	0.176701185428899
2008048	2	1.84040376704363	0.19818360079899	0.105624217555189	0.254671501186132	0.442170468604714	0.171809924957831	1.04158515320318	0.593962294266725	2.43828445856023	2.40422161847292	1.17161750051883	1.05117276933641	1.12837100715829	0.408888638051583	0.173543166629766	0.10768770458838	1.15241462603066	4.71261852338425	0.175635363695106
2008048	3	2.16123268961416	0.192071870517302	0.104934386605394	0.242506515728264	0.482428430072323	0.166374387222179	1.35076089883839	0.651516031702625	2.70897597329123	2.69658455085272	1.05715580923299	0.99326524250997	0.964162800592819	0.411766476570692	0.2120388230374	0.108208480746485	1.48033630353992	5.11932449269898	0.172688646330741
2008048	4	2.44994352819961	0.185017016189917	0.10409739921907	0.233806431311407	0.496421395325316	0.163361500273838	1.66548189850525	0.719164049108878	3.11866312323684	3.1119705576041	1.04275199733407	0.83407742923785	0.926733132092364	0.423253904473339	0.257626211503227	0.104267314185277	1.65779102181145	5.46533698319384	0.16640196159368
2008048	5	2.79357666270289	0.214531702927506	0.1039794621242	0.229898704565941	0.527337719698559	0.159690998470584	1.9543252231664	0.799683262712861	3.56563696888405	3.61013857856894	1.34505122606905	0.661587606288862	0.931427690566283	0.436864654860779	0.270973763381033	0.0988838006607833	1.78002049561639	5.75385801888235	0.156736894953051
2008048	6	3.09266214495366	0.217267739462817	0.103458056538163	0.227619186836884	0.647883761461998	0.1609304426871	2.22649583702525	0.938787707191246	4.10147678368389	3.96258299647277	1.73393470478237	0.559876733340072	0.899784356162028	0.449018018174717	0.235598181387743	0.103429881577527	2.00863791768384	6.13469035523328	0.146327248481954
2008048	7	3.26163848568857	0.206282551413697	0.103020388940658	0.216882267365639	0.684377726588615	0.16215749179012	1.98454615656825	1.16067803168396	4.58777219395638	4.18968651482024	1.40902666715537	0.433631255212751	1.0161894178725	0.440808717065646	0.173219678841481	0.105142923125522	2.17777486928017	6.21716163559467	0.137462761475013
2008048	8	3.46673483503019	0.183983951144383	0.103320131982452	0.215318016331695	0.768054325072116	0.1639585066704	2.58439475835499	1.44323154619709	4.92176937327397	4.247048859203	1.4555336905601	0.380035845832339	1.64913146732142	0.388541600439391	0.146291712866391	0.0967721544133433	2.26885222481659	5.92587887976414	0.130600828858164
2008048	9	3.70169697059838	0.164317910646479	0.0935639905759614	0.211928617066724	0.916130486718351	0.178349266447344	3.29322327374465	1.70156253937557	4.71773600711523	4.11045062531455	1.57146340208337	0.40137772586104	2.02419144047154	0.445947409459712	0.154784968472619	0.109490543115305	2.36811520692547	5.54619385477944	0.126195957273476
2008048	10	3.98643140115053	0.1567745191094	0.0844186223468284	0.183222686233043	1.08289957974979	0.180836506073401	3.17596116159639	1.91827209077981	4.80555006641762	3.87398703334656	1.52566429259492	0.378636357509626	2.50139729789934	1.02352964233115	0.175265372905447	0.12522815610421	2.55178590518561	5.24044742134052	0.122024507946959
2008048	11	4.12890984707076	0.154726734140804	0.0805666373580409	0.170766564926003	1.2840100223901	0.188664310258141	3.17889062922078	2.25774747593377	4.76039210372937	4.07200181382528	1.52657980378436	0.29629955401176	2.90102766538273	1.45395541171218	0.175057284781084	0.105108078316419	2.78154059163963	5.45832098802669	0.121287356632565
2008048	12	4.2265662977467	0.142312730084131	0.0783318462498934	0.158732193416096	1.5819855133704	0.167121967127012	3.34476976526388	2.5351031743373	4.68525646698007	4.17519953425981	1.72062598611751	0.261028471235919	2.06964974082119	1.57542148070522	0.168757060069865	0.0941537963734636	3.0150425635742	6.1001366906178	0.118766706988204
2008048	13	4.25407423843441	0.135229560584166	0.0862061242577513	0.151076892559503	1.95647624649718	0.152044376467555	3.30175948910524	2.70586298505349	4.69017219891171	3.96026501597237	2.04184117727687	0.253506038910727	1.50755234173044	1.29505955237863	0.161620387701741	0.0770062788568284	3.28459022022818	6.75996126674277	0.114187527683079
2008048	14	4.40060532684498	0.12872444959687	0.180188085778734	0.141633562695665	2.17950284421173	0.143140715115969	2.95170024981429	2.97785736707637	4.95391393937398	3.76234116184413	1.91676536194539	0.25713673107696	1.27759075136222	0.840660778355	0.14234377660303	0.0646459992692412	3.55678012438797	8.01330708523797	0.108330027514364
2008048	15	4.34131264355824	0.138199059154337	0.206743487351832	0.130722814462087	2.41186761841372	0.137861596785903	2.69225036619303	3.20160143685499	5.61486079733342	3.6815544030743	1.89837044485332	0.262462495702826	1.11390535366968	0.509768102493727	0.113028746211793	0.0547091831583798	3.74207730005562	7.61061107042818	0.102313409639583
2008048	16	4.21561260177743	0.128116165403731	0.211581404640558	0.122732133797594	2.65698435029672	0.133346837326527	3.00378165358196	3.25638597693119	6.44982734124303	4.12344876551537	1.88408297801175	0.270775960253719	1.01607407111919	0.384021007229896	0.0939990319547845	0.0506922540511716	3.76105180730159	7.16132072501831	0.0972528983207803
2008048	17	4.13944596194481	0.122457602906332	0.197172986352926	0.113995184454801	2.84953753718655	0.125929817028075	3.69170304274071	3.18036643893698	7.32172987619391	4.67755131359795	1.77861269483411	0.274805346412893	0.947875797133016	0.292998452249377	0.0776279749632182	0.0480842898948586	3.77995270459767	6.31626351605184	0.0928365101701052
2008048	18	4.15776245796483	0.121169452023417	0.185985205736891	0.110905895089387	2.90889660730979	0.113798108532862	3.99936721628301	3.15429492743158	7.75796848963988	5.17446169350951	1.85727257341205	0.276883541348404	0.937453575210375	0.226415262725798	0.071235546064721	0.04673942036871	3.35623999031588	5.48903007959212	0.0892842821646353
[truncated: 293 more rows]
