# Supplementary material for: A comparison of sea salt emission parameterizations in northwestern Europe using a chemistry transport model setup
Source: Copernicus journal article supplement (doi:10.5194/acp-16-9905-2016), 2016-08-08
Supplement: Supplementary file 2 [file acp-16-9905-2016-supplement.zip › conc/conc.timeseries.values.win2008.zero.Na.DE0001R.csv]

doy	hour	pm2.5	pm10
2008001	0	3.76563359924316e-17	4.09384038881816e-17
2008001	1	4.06074972164095e-17	4.36529774204331e-17
2008001	2	4.19707370928691e-17	4.54646879795028e-17
2008001	3	4.25760976306294e-17	4.72287980760561e-17
2008001	4	4.33824915974935e-17	4.86682462723843e-17
2008001	5	4.37646051563023e-17	4.94618489506023e-17
2008001	6	4.36704574163726e-17	4.95729954287231e-17
2008001	7	4.40401988349856e-17	5.00361760922542e-17
2008001	8	4.39179603757145e-17	5.00754171974468e-17
2008001	9	4.3469801690331e-17	5.01988127219554e-17
2008001	10	4.329620964372e-17	5.01743336651439e-17
2008001	11	4.24487667786581e-17	4.89632324550419e-17
2008001	12	4.16129807267121e-17	4.79516507872178e-17
2008001	13	4.09012269803337e-17	4.70848667837108e-17
2008001	14	4.03159974466707e-17	4.63901564781528e-17
2008001	15	3.98545246494115e-17	4.59025751241531e-17
2008001	16	3.98370597494388e-17	4.58901759107579e-17
2008001	17	4.03443283676277e-17	4.67764221449047e-17
2008001	18	4.10842193998609e-17	4.80382238224241e-17
2008001	19	4.15981933301449e-17	4.91150260163292e-17
2008001	20	4.19177971829749e-17	4.97814071970593e-17
2008001	21	4.2089359253826e-17	5.00177108516511e-17
2008001	22	4.23412746921511e-17	5.02670658257758e-17
2008001	23	4.26766946562534e-17	5.08033801697586e-17
2008002	0	4.35988484648058e-17	5.18981055794844e-17
2008002	1	4.47850017165527e-17	5.34543504021304e-17
2008002	2	4.56697927526313e-17	5.48871860151566e-17
2008002	3	4.47059033624312e-17	5.45763056214499e-17
2008002	4	4.5080851568554e-17	5.42334770068302e-17
2008002	5	4.65524253953353e-17	5.57550564908108e-17
2008002	6	4.82805297741897e-17	5.84869430130285e-17
2008002	7	4.96897104595484e-17	6.24176269384614e-17
2008002	8	4.95348415058809e-17	6.49084842782828e-17
2008002	9	5.05904148937212e-17	6.9463829462679e-17
2008002	10	7.12560906995636e-17	1.06906068778907e-16
2008002	11	4.96587765863678e-17	7.26642918045425e-17
2008002	12	6.02202696939764e-17	7.83356686573237e-17
2008002	13	5.95602066467953e-17	7.47736950190935e-17
2008002	14	5.77519700115372e-17	7.13010766315631e-17
2008002	15	5.57912679935893e-17	6.83850719527012e-17
2008002	16	5.24026063602342e-17	6.48236504194822e-17
2008002	17	4.94266826918704e-17	5.96093745098419e-17
2008002	18	4.71602829534032e-17	5.37331242812805e-17
2008002	19	4.23074940179467e-17	4.73325404030274e-17
2008002	20	3.53630770897496e-17	3.96378530096299e-17
2008002	21	2.83637392450101e-17	3.20389644412746e-17
2008002	22	2.31833331212625e-17	2.65049431681352e-17
2008002	23	1.85925668192e-17	2.13395439351128e-17
2008003	0	1.44424851377134e-17	1.67162055145593e-17
2008003	1	1.12258004084569e-17	1.30213457035211e-17
2008003	2	8.97576276990482e-18	1.03609922198461e-17
2008003	3	7.61806539934621e-18	8.80706534192673e-18
2008003	4	6.83021610993341e-18	7.98067694535958e-18
2008003	5	6.35332181185464e-18	7.51190055724326e-18
2008003	6	6.11528443717306e-18	7.20808626460987e-18
2008003	7	5.51213458481594e-18	6.44671226259061e-18
2008003	8	5.05584643265359e-18	5.88764612661043e-18
2008003	9	4.86895784537006e-18	5.6432028424526e-18
2008003	10	4.40159002948768e-18	5.05710411466482e-18
2008003	11	4.27904805326213e-18	4.93541029171955e-18
2008003	12	4.43615495810247e-18	5.16854148093162e-18
2008003	13	5.03569926478924e-18	5.91873949219226e-18
2008003	14	5.99329523629179e-18	7.03790920294128e-18
2008003	15	7.01957892360108e-18	8.25904378621677e-18
2008003	16	7.21813676942905e-18	8.39548625947052e-18
2008003	17	7.29834069828919e-18	8.37059546793816e-18
2008003	18	7.78799445350291e-18	8.8882016705257e-18
2008003	19	8.57426046335315e-18	9.61553004120021e-18
2008003	20	8.54029324694388e-18	9.5641798124855e-18
2008003	21	8.69840235109881e-18	9.69429289335335e-18
2008003	22	9.29790138536872e-18	1.03744817050234e-17
2008003	23	9.8013297550393e-18	1.09206006017148e-17
2008004	0	1.05713951984706e-17	1.17551083866269e-17
2008004	1	1.11895000821077e-17	1.24329110431557e-17
2008004	2	1.14280678913208e-17	1.26906190418586e-17
2008004	3	1.15879809311151e-17	1.28479987878946e-17
2008004	4	1.16154789211645e-17	1.27728889368489e-17
2008004	5	1.17057108342378e-17	1.2786468599628e-17
2008004	6	1.1574871873097e-17	1.25978794124037e-17
2008004	7	1.1673324962335e-17	1.27262316135081e-17
2008004	8	1.19729762668706e-17	1.30732047343817e-17
2008004	9	1.2523255617492e-17	1.36843161945896e-17
2008004	10	1.30927094078387e-17	1.42869652587659e-17
2008004	11	1.34924291849184e-17	1.47070957307291e-17
2008004	12	1.36306798844952e-17	1.48080580232953e-17
2008004	13	1.33838811040853e-17	1.45062612757053e-17
2008004	14	1.32971485328487e-17	1.44345838467522e-17
2008004	15	1.35853260321557e-17	1.48058955527547e-17
2008004	16	1.44066038968308e-17	1.58158575599819e-17
2008004	17	1.42889297964923e-17	1.56361385661816e-17
2008004	18	1.39560451678332e-17	1.51212834423689e-17
2008004	19	1.4205772912324e-17	1.53603400860314e-17
2008004	20	1.46092146739175e-17	1.58665045886935e-17
2008004	21	1.50429919291586e-17	1.63704914875785e-17
2008004	22	1.59381894797021e-17	1.72810765952902e-17
2008004	23	1.72553059451587e-17	1.87105252964155e-17
2008005	0	1.88115417997969e-17	2.03983325476409e-17
2008005	1	2.05842628874981e-17	2.22479506155128e-17
2008005	2	2.21340962375853e-17	2.40432927379911e-17
2008005	3	2.52243905838195e-17	2.75666721034393e-17
2008005	4	2.88297051789061e-17	3.16390758771465e-17
2008005	5	3.29703461084149e-17	3.73345585440425e-17
2008005	6	3.70772272577821e-17	4.3999149160075e-17
2008005	7	4.00516386159419e-17	4.92068091817157e-17
2008005	8	4.23809690632047e-17	5.22012180169779e-17
2008005	9	4.1228132944024e-17	4.87627262352658e-17
2008005	10	3.75136671911879e-17	4.34195088533176e-17
2008005	11	3.51633334706531e-17	3.91894823660084e-17
2008005	12	3.18264714206726e-17	3.54037329053968e-17
2008005	13	3.18203233807434e-17	3.73834169661375e-17
2008005	14	4.54064230317073e-17	5.75588174529373e-17
2008005	15	7.40679286531242e-17	1.00978860213861e-16
2008005	16	9.91899783252085e-17	1.32829944010364e-16
2008005	17	1.23724990899241e-16	1.69807975252417e-16
2008005	18	1.17980801782841e-16	1.60190709789873e-16
2008005	19	1.25589580183708e-16	1.69996519208315e-16
2008005	20	1.25142918841434e-16	1.69901605387536e-16
2008005	21	1.17412435609531e-16	1.60204969974665e-16
2008005	22	7.50627988586656e-17	1.03237467672073e-16
2008005	23	1.05431714654826e-16	1.44214982444149e-16
2008006	0	1.24977569705695e-16	1.70295501474029e-16
2008006	1	1.25353875400821e-16	1.67962859179721e-16
2008006	2	1.21679905651944e-16	1.59888699290216e-16
2008006	3	1.22175694804146e-16	1.63240907123324e-16
2008006	4	8.35707351216502e-17	1.12737455081485e-16
2008006	5	9.32780455844607e-17	1.26555918358456e-16
2008006	6	1.01666441121963e-16	1.38452291984733e-16
2008006	7	1.08627800742276e-16	1.49497927803922e-16
2008006	8	1.12280937512425e-16	1.56628761486049e-16
2008006	9	1.15449638903875e-16	1.59814367724226e-16
2008006	10	1.18360416219762e-16	1.63369013716302e-16
2008006	11	1.23970071734454e-16	1.71338396899774e-16
2008006	12	1.15994348710614e-16	1.55875754675366e-16
2008006	13	1.01985207074363e-16	1.28997148279436e-16
2008006	14	8.99672483462532e-17	1.09072241963183e-16
2008006	15	7.97843713336247e-17	9.4406484458109e-17
2008006	16	7.12192183871992e-17	8.27685348456232e-17
2008006	17	6.41049370419207e-17	7.3326864789742e-17
2008006	18	5.91971218541432e-17	6.68561822852937e-17
2008006	19	5.5869070611355e-17	6.2555376178383e-17
2008006	20	5.35093622453267e-17	5.96928615166308e-17
2008006	21	5.28125642997346e-17	5.79765418785647e-17
2008006	22	5.27988506716926e-17	5.75299869244642e-17
2008006	23	5.3427042680038e-17	5.79982585904012e-17
2008007	0	5.50061281224762e-17	5.98651205550567e-17
2008007	1	5.79839605277645e-17	6.41469156633126e-17
2008007	2	6.04405709908821e-17	7.0881517033938e-17
2008007	3	6.33362880832813e-17	7.81664220338724e-17
2008007	4	6.68632499955303e-17	8.36071663881886e-17
2008007	5	7.02380846686891e-17	8.8163165473087e-17
2008007	6	7.35213893294092e-17	9.12849933915708e-17
2008007	7	7.15952112495522e-17	9.17038374946704e-17
2008007	8	6.6362597715266e-17	8.92094660671648e-17
2008007	9	6.00221663951696e-17	8.49861115204046e-17
2008007	10	5.82713128402226e-17	8.26588880174105e-17
2008007	11	5.7455730729149e-17	8.14687093257131e-17
2008007	12	5.59020522081959e-17	7.85014411304759e-17
2008007	13	5.40169121054913e-17	7.4611122822965e-17
2008007	14	5.25196643396513e-17	7.20317083615116e-17
2008007	15	5.26219859709794e-17	7.08345326300521e-17
2008007	16	5.34955896785357e-17	7.07245890072998e-17
2008007	17	5.45031144282308e-17	7.08328573582332e-17
2008007	18	5.76815864919067e-17	7.20959813958804e-17
2008007	19	5.05625737060826e-17	6.36380199105972e-17
2008007	20	7.16691331945752e-17	1.03922777732027e-16
2008007	21	1.26579481628432e-19	1.81113487425157e-19
2008007	22	8.51778188925972e-17	1.14769528215968e-16
2008007	23	1.12057680563515e-16	1.47727797620692e-16
2008008	0	1.26194042151867e-16	1.70759999968603e-16
2008008	1	1.25581706812163e-16	1.70188257723295e-16
2008008	2	1.24986921826635e-16	1.6983336925752e-16
2008008	3	1.02860639409797e-16	1.39955402038169e-16
2008008	4	1.05494570706791e-16	1.42913634528731e-16
2008008	5	1.09341410080282e-16	1.36827166112956e-16
2008008	6	1.0753844397832e-16	1.31704522761957e-16
2008008	7	1.04168998314198e-16	1.31444545102024e-16
2008008	8	9.09917872067565e-17	1.18459267548403e-16
2008008	9	7.6811340122001e-17	9.96702123500787e-17
2008008	10	7.00208475793687e-17	8.9330902343632e-17
2008008	11	7.11793326471423e-17	8.69297675335601e-17
2008008	12	6.89112047051477e-17	8.04740911634609e-17
2008008	13	6.53507631893978e-17	7.39454430593424e-17
2008008	14	6.25597230137328e-17	7.27389001910696e-17
2008008	15	6.10222672006913e-17	7.41445290882522e-17
2008008	16	6.46139701495534e-17	7.63876894094968e-17
2008008	17	7.06691440323844e-17	8.28455349230292e-17
2008008	18	7.35119185340525e-17	8.99741596533334e-17
2008008	19	7.36648490154283e-17	8.85879731077303e-17
2008008	20	6.65120068465852e-17	7.49527105981512e-17
2008008	21	6.9002756481896e-17	7.67073568033927e-17
2008008	22	7.02864181969431e-17	7.65141507701648e-17
2008008	23	6.76859335476336e-17	7.4390640712997e-17
2008009	0	6.87214954833552e-17	7.65233047696688e-17
2008009	1	7.06174723683258e-17	8.10328321662417e-17
2008009	2	7.1480541722568e-17	8.21365965900367e-17
2008009	3	7.08559027511336e-17	8.20470744347795e-17
2008009	4	6.93514065293278e-17	8.0846385092884e-17
2008009	5	6.83999035294801e-17	7.81363055798625e-17
2008009	6	6.56931468261278e-17	7.40298920955627e-17
2008009	7	6.17061930686583e-17	6.74217605986483e-17
2008009	8	5.34486547140539e-17	6.2861173442541e-17
2008009	9	7.98932042093961e-17	1.01779967414373e-16
2008009	10	1.2453107599318e-16	1.70233375928625e-16
2008009	11	1.19364567632764e-16	1.56808964555926e-16
2008009	12	1.14466575875391e-16	1.438926408457e-16
2008009	13	1.1137075887607e-16	1.36377441102391e-16
2008009	14	1.07849829188136e-16	1.31127238294396e-16
2008009	15	1.05263059211303e-16	1.27001388667644e-16
2008009	16	1.03098456725875e-16	1.23759931747499e-16
2008009	17	1.0386799805092e-16	1.24955829002207e-16
2008009	18	1.06409437653903e-16	1.2901521033776e-16
2008009	19	1.07725431139964e-16	1.3077632110091e-16
2008009	20	1.07252076286435e-16	1.2918144017713e-16
2008009	21	1.05124697096011e-16	1.2600007301876e-16
2008009	22	1.05518798512502e-16	1.29489378423364e-16
2008009	23	9.58228038628782e-17	1.16875969780023e-16
2008010	0	8.77143413133781e-17	1.0760623298592e-16
2008010	1	8.4785686153511e-17	1.03105635617454e-16
2008010	2	7.75690959019083e-17	9.28954859355678e-17
2008010	3	6.81191286847373e-17	7.54239577170144e-17
2008010	4	6.11674680814586e-17	6.7225441373606e-17
2008010	5	6.09531291998383e-17	6.72845123853425e-17
2008010	6	6.045892186198e-17	6.69729427538254e-17
2008010	7	6.04145919052978e-17	6.65423312869887e-17
2008010	8	5.98900349792086e-17	6.54767666434038e-17
2008010	9	5.85945000075156e-17	6.36271596719861e-17
2008010	10	5.65398018590952e-17	6.15310670036254e-17
2008010	11	5.51409736104585e-17	6.00222497582663e-17
2008010	12	5.40906103200562e-17	5.96284260399808e-17
2008010	13	5.37453187620416e-17	6.01878738422862e-17
2008010	14	5.39513711139778e-17	6.10247847012822e-17
2008010	15	5.30587563970903e-17	6.08345509138509e-17
2008010	16	5.25708613779654e-17	6.0113507492346e-17
2008010	17	5.29830259233506e-17	6.08683261566101e-17
2008010	18	5.83646281679203e-17	6.87389815683329e-17
2008010	19	7.27802784449685e-17	9.16604196571963e-17
2008010	20	8.85966852495486e-17	1.13652472375427e-16
2008010	21	9.61102408397197e-17	1.23280662638399e-16
2008010	22	9.60065721658338e-17	1.2024392448563e-16
2008010	23	9.02736698674039e-17	1.10051780128357e-16
2008011	0	8.46687215551948e-17	1.00263133477707e-16
2008011	1	8.0839170348569e-17	9.22774592859467e-17
2008011	2	7.77911340882022e-17	8.74328200557889e-17
2008011	3	7.34421392627225e-17	8.23405931470522e-17
2008011	4	6.84666956390371e-17	7.54588770067643e-17
2008011	5	6.0241866080804e-17	6.55982908715183e-17
2008011	6	5.10015602109963e-17	5.51440335323061e-17
2008011	7	3.80229856909723e-17	3.93582358765517e-17
2008011	8	3.28241815404673e-17	3.35065209176978e-17
2008011	9	3.15697588039635e-17	3.21239457374828e-17
2008011	10	3.62114969701482e-17	3.76400787593009e-17
2008011	11	3.91485229727031e-17	4.10384956952917e-17
2008011	12	4.03804921611972e-17	4.25615782711715e-17
2008011	13	4.15877789503727e-17	4.39442618240572e-17
2008011	14	4.30384856283224e-17	4.59857034853289e-17
2008011	15	4.61240936662536e-17	4.96385740208562e-17
2008011	16	4.08628817979809e-17	4.27958098564649e-17
2008011	17	3.99584048764701e-17	4.37847488763042e-17
2008011	18	4.99864590292055e-17	5.75717727780845e-17
2008011	19	5.71204097836534e-17	6.72473443502738e-17
2008011	20	5.40380476909891e-17	6.33035589422222e-17
2008011	21	4.96855389836786e-17	5.62335878626671e-17
2008011	22	5.17731489244491e-17	5.66791150492672e-17
2008011	23	6.2157703794179e-17	7.58985151525467e-17
2008012	0	7.13586413709508e-17	8.79256634810264e-17
2008012	1	8.01075118181276e-17	9.69245227005082e-17
2008012	2	8.66516036700217e-17	1.03650843702583e-16
2008012	3	8.93957015012961e-17	1.07479138714132e-16
2008012	4	8.05160260303574e-17	1.08058640458518e-16
2008012	5	8.17032783075347e-17	1.10474083244107e-16
2008012	6	8.15432727054802e-17	1.12973785462205e-16
2008012	7	8.07950701130491e-17	1.14053152745807e-16
2008012	8	1.20746062454227e-16	1.76317441699965e-16
2008012	9	5.71527197745023e-17	7.48151892864659e-17
2008012	10	3.53234033177402e-17	4.09077001749701e-17
2008012	11	3.70665873708054e-17	4.25849635427993e-17
2008012	12	4.74215648016009e-17	5.82183760495376e-17
2008012	13	5.28335644091803e-17	6.83967989526559e-17
2008012	14	6.71842047542622e-17	8.50858196936001e-17
2008012	15	7.6476558419426e-17	9.51741678831644e-17
2008012	16	8.15728069752887e-17	1.04191130721326e-16
2008012	17	9.24966828734122e-17	1.19529981769136e-16
2008012	18	9.86221360042616e-17	1.27648265817384e-16
2008012	19	1.01141977780676e-16	1.33087187705103e-16
2008012	20	9.2075946969994e-17	1.23202592987121e-16
2008012	21	7.76155828134441e-17	9.94297672483499e-17
2008012	22	6.90512585743667e-17	8.53985471074134e-17
2008012	23	7.43173903268472e-17	9.41081366824964e-17
2008013	0	1.24268024640446e-16	1.73719581237786e-16
2008013	1	1.25056607296013e-16	1.79589050865876e-16
2008013	2	1.05927388230525e-16	1.4935424288813e-16
2008013	3	6.30236917394406e-17	8.95777203503206e-17
2008013	4	1.29091676264692e-17	1.85304601812464e-17
2008013	5	6.07166092140977e-17	7.82835494272691e-17
2008013	6	7.09806313097763e-17	9.26042360749272e-17
2008013	7	7.2521784082426e-17	9.4846324893496e-17
2008013	8	7.43992299473794e-17	9.56709342847086e-17
2008013	9	7.35910803675798e-17	9.55891542088469e-17
2008013	10	7.11863724961945e-17	9.35686616118413e-17
2008013	11	7.00762271497926e-17	9.10623691089293e-17
2008013	12	7.01981468030871e-17	8.95065047670795e-17
2008013	13	7.19398448433979e-17	8.97954507705062e-17
2008013	14	7.35737296789513e-17	8.99259391220086e-17
2008013	15	7.35668130844325e-17	8.82785105728134e-17
2008013	16	7.21179873651404e-17	8.49232832177466e-17
2008013	17	7.0334617841203e-17	8.13948851744819e-17
2008013	18	6.90649444384667e-17	7.93331716083752e-17
2008013	19	6.79774205548219e-17	7.83720787691303e-17
2008013	20	6.70014539955009e-17	7.85743773395318e-17
2008013	21	6.76935286392453e-17	8.00182485165929e-17
2008013	22	7.04594697963437e-17	8.30067192859792e-17
2008013	23	7.48355940691954e-17	8.82812090999397e-17
2008014	0	7.80634176202866e-17	9.49121108606388e-17
2008014	1	7.78059998701331e-17	9.57647171482909e-17
2008014	2	7.58105496916816e-17	9.43772367868999e-17
2008014	3	7.24167876798414e-17	9.0844971590102e-17
2008014	4	6.92467910199943e-17	8.64856883201691e-17
2008014	5	6.70235291804668e-17	8.36017607207055e-17
2008014	6	6.53648317359407e-17	8.08356718173048e-17
2008014	7	6.48403676956051e-17	7.9056935719252e-17
2008014	8	6.32097600896647e-17	7.59460975497981e-17
2008014	9	6.19803970591939e-17	7.30999827864337e-17
2008014	10	6.14174978540802e-17	7.07907067807061e-17
2008014	11	6.00361776568802e-17	6.76695483087664e-17
2008014	12	5.6035638640996e-17	6.21681693254017e-17
2008014	13	4.97834158870977e-17	5.52042860620005e-17
2008014	14	4.46416660067072e-17	4.89402824789804e-17
2008014	15	4.18159211225762e-17	4.66807288800086e-17
2008014	16	4.4375083533803e-17	5.01520817467681e-17
2008014	17	5.01828302156638e-17	5.76942964938923e-17
2008014	18	5.53494898996805e-17	6.52320553718102e-17
2008014	19	6.25464030454168e-17	7.44011127691332e-17
2008014	20	7.24534253472545e-17	8.57781579475883e-17
2008014	21	8.06487664782276e-17	9.53214255125954e-17
2008014	22	8.34341709934605e-17	9.82586325681282e-17
2008014	23	8.29186545413169e-17	9.83022623452611e-17
2008015	0	8.1472618027613e-17	9.66214981258626e-17
2008015	1	7.66605960626549e-17	9.32501059671542e-17
2008015	2	7.11598137671579e-17	8.83073912665541e-17
2008015	3	9.75742283412836e-17	1.38722755825907e-16
2008015	4	9.74524402612654e-17	1.38168237337301e-16
2008015	5	9.53238869810631e-17	1.37019671646692e-16
2008015	6	1.19306345515205e-16	1.69862290702254e-16
2008015	7	1.21165984413596e-16	1.70014165278647e-16
2008015	8	8.3076199279611e-17	1.01604368704805e-16
2008015	9	7.0490393626101e-17	8.55311591935072e-17
2008015	10	6.32679070410098e-17	7.46487782845441e-17
2008015	11	6.4811076377256e-17	7.30639235356552e-17
2008015	12	6.71809940265063e-17	7.73735468253406e-17
2008015	13	5.49240112257407e-17	6.16949607876431e-17
2008015	14	3.58809086668241e-17	3.76665068100706e-17
2008015	15	2.86911599232462e-17	2.97372128378085e-17
2008015	16	2.20157631643045e-17	2.2705659279291e-17
2008015	17	1.95080658111365e-17	2.00886827321125e-17
2008015	18	1.98010053738021e-17	2.04350033291471e-17
2008015	19	2.13172017022347e-17	2.20811400791427e-17
2008015	20	2.22053676788528e-17	2.3001960509708e-17
2008015	21	2.30903259394038e-17	2.41492186674186e-17
2008015	22	2.21632765379313e-17	2.32515237812115e-17
2008015	23	1.95986954191755e-17	2.06146835962547e-17
2008016	0	2.07548309405435e-17	2.21676837295761e-17
2008016	1	3.34400344288879e-17	3.82385812073366e-17
2008016	2	8.1180931907621e-17	1.0524736705461e-16
2008016	3	9.92425974261058e-17	1.3439572825859e-16
2008016	4	7.69679514418579e-17	1.00594964650276e-16
2008016	5	6.91894342020104e-17	8.9115431025217e-17
2008016	6	6.54711454865293e-17	8.15482433641857e-17
2008016	7	6.21343146418725e-17	7.33492937264463e-17
2008016	8	6.50564007683216e-17	7.7403302172876e-17
2008016	9	6.99025269085568e-17	8.32558319043129e-17
2008016	10	7.06883692648849e-17	8.45212007888722e-17
2008016	11	7.50347074125917e-17	9.01066510582702e-17
2008016	12	8.63725511311787e-17	1.07039855535467e-16
2008016	13	9.69741658651532e-17	1.23168790752582e-16
2008016	14	1.02805786165585e-16	1.31257697039336e-16
2008016	15	1.09938914017446e-16	1.40598437686169e-16
2008016	16	1.13112903226799e-16	1.46114216930059e-16
2008016	17	1.11842590032316e-16	1.450402448807e-16
2008016	18	1.04170702362111e-16	1.35230932206089e-16
2008016	19	8.98467386253663e-17	1.16070892503323e-16
2008016	20	7.45904089767223e-17	9.43951398133231e-17
2008016	21	6.36216559245281e-17	7.9233485175387e-17
2008016	22	6.05838644380995e-17	7.51146545859806e-17
2008016	23	4.98893543269492e-17	6.11499701526969e-17
2008017	0	3.73831877447811e-17	4.51568092715394e-17
2008017	1	2.97947954139754e-17	3.55957427076487e-17
2008017	2	2.72636644077183e-17	3.26147012496116e-17
2008017	3	2.60655301812344e-17	3.12448791968542e-17
2008017	4	2.49611696591384e-17	2.99361544033894e-17
2008017	5	2.48332836247302e-17	2.98628026496151e-17
2008017	6	2.54588885202467e-17	3.07635295390096e-17
2008017	7	2.54383171404684e-17	3.07213970403012e-17
2008017	8	2.7030229388938e-17	3.30846326732005e-17
2008017	9	3.27593831492175e-17	4.10120949628748e-17
2008017	10	4.05732106390302e-17	5.1620372388615e-17
2008017	11	5.09711607613498e-17	6.35960302218024e-17
2008017	12	5.84454117578115e-17	7.57171078736332e-17
2008017	13	6.43967959562875e-17	8.48136038933191e-17
2008017	14	5.9454951230829e-17	7.66383703834285e-17
2008017	15	5.71860507063363e-17	7.34280719421672e-17
2008017	16	5.80284258502279e-17	7.52102296875322e-17
2008017	17	5.90137670247172e-17	7.56445500771662e-17
2008017	18	6.28184894387503e-17	7.70971098421702e-17
2008017	19	6.44664982945601e-17	7.67535602485052e-17
2008017	20	5.6461634223321e-17	6.25395310592415e-17
2008017	21	4.21940094282022e-17	4.50044046324447e-17
2008017	22	3.54113034395387e-17	3.75968304285403e-17
2008017	23	3.40810247997422e-17	3.65936103472561e-17
2008018	0	5.2539073241102e-17	6.37783156914607e-17
2008018	1	7.56007747412568e-17	9.84762201431844e-17
2008018	2	1.21238998236614e-16	1.70784228293089e-16
2008018	3	1.20158070686057e-16	1.7132703318884e-16
2008018	4	1.20179679035173e-16	1.71634631785668e-16
2008018	5	1.23346495266622e-16	1.72333987426905e-16
2008018	6	1.25252288668454e-16	1.72330172824988e-16
2008018	7	1.25314836042911e-16	1.72396671580406e-16
2008018	8	7.99081138651337e-17	1.03495562712291e-16
2008018	9	7.48009671520172e-17	9.03731511504611e-17
2008018	10	7.22132298037084e-17	8.48613410821225e-17
2008018	11	7.06171499793062e-17	8.26429515381663e-17
2008018	12	7.27272137862261e-17	8.39756371248312e-17
2008018	13	7.19902529257127e-17	8.17616102476376e-17
2008018	14	6.92586731982837e-17	7.82823040750653e-17
2008018	15	6.6958578854184e-17	7.50020694179341e-17
2008018	16	6.74227384225391e-17	7.54367585063495e-17
2008018	17	6.86230316774239e-17	7.91934456924672e-17
2008018	18	6.50373033724506e-17	7.60388473654029e-17
2008018	19	5.00954275856485e-17	5.6323705897133e-17
2008018	20	3.55240966322354e-17	3.85506575171411e-17
2008018	21	2.42931621554548e-17	2.60798093955988e-17
2008018	22	1.91721327760165e-17	2.14922222672603e-17
2008018	23	1.70843387136648e-17	1.91340332851295e-17
2008019	0	1.27214422895366e-17	1.34838020020053e-17
2008019	1	1.55931777163699e-17	1.64825944548527e-17
2008019	2	3.89113783583237e-17	4.29942295788581e-17
2008019	3	6.48398051563859e-17	7.50587933193672e-17
2008019	4	1.26386089602376e-16	1.70137876534918e-16
2008019	5	1.14879252386931e-16	1.39951891811714e-16
2008019	6	5.83012548697803e-17	7.01400097803838e-17
2008019	7	4.93323931124111e-17	5.85269535996707e-17
2008019	8	6.03730475935567e-17	7.32882913644717e-17
2008019	9	6.70583088179008e-17	8.16381412041805e-17
2008019	10	6.51775277407025e-17	7.86736955338955e-17
2008019	11	6.27469247274937e-17	7.52486781903151e-17
2008019	12	6.4796208358771e-17	7.79069363931676e-17
2008019	13	7.1063230625214e-17	8.59575566898639e-17
2008019	14	7.77481732709906e-17	9.44553649525193e-17
2008019	15	8.28169094787598e-17	1.00272270653665e-16
2008019	16	8.56220951520887e-17	1.03265930311708e-16
2008019	17	8.38778283533245e-17	1.00840928690118e-16
2008019	18	7.76774669267293e-17	9.28987429435301e-17
2008019	19	7.07005073321516e-17	8.4563095066155e-17
2008019	20	6.5474058342191e-17	7.87590993789292e-17
2008019	21	6.1992799644273e-17	7.42561353938204e-17
2008019	22	5.87623992984925e-17	7.01695473986729e-17
2008019	23	5.59416865548227e-17	6.64267342868619e-17
2008020	0	5.32376945367536e-17	6.27064154653032e-17
2008020	1	5.11246914568559e-17	5.97274506729877e-17
2008020	2	4.97685372350919e-17	5.7642498576783e-17
2008020	3	4.92459461558375e-17	5.64841580728204e-17
2008020	4	4.94103925483299e-17	5.63349029944493e-17
2008020	5	4.99531986346908e-17	5.69615945942548e-17
2008020	6	5.04147672578695e-17	5.80408180441061e-17
2008020	7	5.10227690681065e-17	5.96623427451861e-17
2008020	8	5.10302583107448e-17	6.05855671854512e-17
2008020	9	5.02007059888557e-17	6.02326342632466e-17
2008020	10	4.90286674604442e-17	5.88329356244423e-17
2008020	11	4.73985491121424e-17	5.67151140499067e-17
2008020	12	4.55613350625276e-17	5.43417759571592e-17
2008020	13	4.35062448949725e-17	5.16409917894728e-17
2008020	14	3.95647793228958e-17	4.72524344297755e-17
2008020	15	3.3103434800993e-17	3.89648111492106e-17
2008020	16	2.76030827673181e-17	3.20641844264222e-17
2008020	17	2.49152807154715e-17	2.85305291631826e-17
2008020	18	2.36438753253164e-17	2.6462456997481e-17
2008020	19	2.1931769954183e-17	2.44086389676099e-17
2008020	20	1.96351067385423e-17	2.23797674670236e-17
2008020	21	1.76311246106366e-17	2.09688729588715e-17
2008020	22	1.75763661728872e-17	2.04436871542055e-17
2008020	23	1.80963607789102e-17	2.09416059860781e-17
2008021	0	1.85430622259101e-17	2.14964247858222e-17
2008021	1	1.82983248539487e-17	2.13088431480366e-17
2008021	2	1.76944912033188e-17	2.05671810078513e-17
2008021	3	1.66994359980406e-17	1.95285020481248e-17
2008021	4	1.59924713436339e-17	1.87734023093177e-17
2008021	5	1.62812610696599e-17	1.94181651334483e-17
2008021	6	1.83282355003172e-17	2.22459186229451e-17
2008021	7	2.10307401543164e-17	2.55339630364547e-17
2008021	8	2.36211016651215e-17	2.84030174771043e-17
2008021	9	2.58674091690247e-17	3.07279942604073e-17
2008021	10	2.85739590054764e-17	3.36952453426908e-17
2008021	11	3.13162878196776e-17	3.68001049123824e-17
2008021	12	3.36418136578251e-17	3.94738118660315e-17
2008021	13	3.52767151177959e-17	4.13980584523497e-17
2008021	14	3.68164185492106e-17	4.34790971471425e-17
2008021	15	3.99198085683195e-17	4.81207467635951e-17
2008021	16	4.02964518429845e-17	4.86261500673991e-17
2008021	17	3.75579394271262e-17	4.49086226828577e-17
2008021	18	3.73859537175025e-17	4.43714845142591e-17
2008021	19	4.45102658144697e-17	5.24298973385195e-17
2008021	20	5.07762930617673e-17	5.98253009634997e-17
2008021	21	5.75172249053797e-17	6.77369064206877e-17
2008021	22	6.74381350845963e-17	8.03835912966534e-17
2008021	23	7.64156387915534e-17	9.35187559267213e-17
2008022	0	1.01055532004918e-16	1.32513850648849e-16
2008022	1	1.30567802879121e-16	1.80028485547489e-16
2008022	2	1.31714343117394e-16	1.80883475696191e-16
2008022	3	1.14007951978522e-16	1.54616647097954e-16
2008022	4	1.15168982342327e-16	1.64002523894629e-16
2008022	5	1.26864543777785e-16	1.815276246247e-16
2008022	6	1.26050058523144e-16	1.83129310406856e-16
2008022	7	9.40628863531197e-17	1.26852602062141e-16
2008022	8	8.98886441702987e-17	1.15255646005431e-16
2008022	9	8.69873981889057e-17	1.0656207711437e-16
2008022	10	8.50027658214756e-17	1.01002488306122e-16
2008022	11	8.29274252532401e-17	9.78620877092327e-17
2008022	12	8.11062204257766e-17	9.63967162187013e-17
2008022	13	8.04370770678314e-17	9.69721178334939e-17
2008022	14	8.12820177921935e-17	9.9498664611089e-17
2008022	15	8.4884429990504e-17	1.0511265694042e-16
2008022	16	9.08182293853953e-17	1.14664252108755e-16
2008022	17	9.11209100322698e-17	1.15304809463289e-16
2008022	18	8.72258512476089e-17	1.09228899941798e-16
2008022	19	7.94567680105739e-17	9.84229125643113e-17
2008022	20	7.25708753804338e-17	8.91788457465288e-17
2008022	21	6.70167188639404e-17	8.16472067958593e-17
2008022	22	6.24565379324623e-17	7.5267912362779e-17
2008022	23	5.92349948272955e-17	7.08258181652698e-17
2008023	0	5.76022301814292e-17	6.83549982178838e-17
2008023	1	5.72557845187116e-17	6.75187581832421e-17
2008023	2	5.76365401234371e-17	6.78395930357633e-17
2008023	3	5.86029151257353e-17	6.88816580483609e-17
2008023	4	6.10036574069967e-17	7.30693479348611e-17
2008023	5	6.40010933158397e-17	7.77600293539852e-17
2008023	6	5.92677888493985e-17	7.2777939077659e-17
2008023	7	5.34097941250574e-17	6.63080910674731e-17
2008023	8	4.71798671510765e-17	5.77936284451102e-17
2008023	9	3.69118178622531e-17	4.50589778468285e-17
2008023	10	3.0384347371374e-17	3.65263984167694e-17
2008023	11	2.6132771610222e-17	3.01035315085923e-17
2008023	12	2.32204600074865e-17	2.57834228964613e-17
2008023	13	2.37062243436874e-17	2.62687892236424e-17
2008023	14	2.55561383125346e-17	2.87883153723265e-17
2008023	15	2.65994959120349e-17	3.00954438886874e-17
2008023	16	2.72372772154631e-17	3.0830393825718e-17
2008023	17	3.01197881907307e-17	3.48447486686106e-17
2008023	18	3.57916146582217e-17	4.20011013670775e-17
2008023	19	3.92552703103222e-17	4.76398978237195e-17
2008023	20	4.08842590693585e-17	5.0445229818926e-17
2008023	21	4.29152277709578e-17	5.10151291709256e-17
2008023	22	4.40649475220015e-17	5.07359910770442e-17
2008023	23	4.46434867390194e-17	5.08459172513118e-17
2008024	0	4.56917408231297e-17	5.22139838044249e-17
2008024	1	4.84719038549999e-17	5.4669977515006e-17
2008024	2	5.14380458558315e-17	5.78915781027009e-17
2008024	3	5.55392511638618e-17	6.27837952588154e-17
2008024	4	6.13669425281828e-17	6.96883752775643e-17
2008024	5	6.8646985006848e-17	7.79433530508824e-17
2008024	6	7.25328088846131e-17	8.23947773994988e-17
2008024	7	6.32020159043759e-17	7.06088181167593e-17
2008024	8	5.76510553271768e-17	6.46661620375149e-17
2008024	9	8.90724960117123e-17	1.10807889937681e-16
2008024	10	1.09583274993176e-16	1.36784726379914e-16
2008024	11	1.10534594138987e-16	1.36093333284578e-16
2008024	12	1.09463624595443e-16	1.35004735116569e-16
2008024	13	1.12923140518789e-16	1.4087880407418e-16
2008024	14	1.14175675960313e-16	1.42564584821655e-16
2008024	15	1.14683030686792e-16	1.44006207243462e-16
2008024	16	1.17626140422239e-16	1.49213627024405e-16
2008024	17	1.19775962071131e-16	1.51709891655374e-16
2008024	18	1.18252640056453e-16	1.50127455799708e-16
2008024	19	1.25311902771576e-16	1.70162357131979e-16
2008024	20	1.26550133610499e-16	1.71238901626988e-16
2008024	21	1.19573252935696e-16	1.51355259963782e-16
2008024	22	1.12454540289485e-16	1.39315116318823e-16
2008024	23	1.05084388110619e-16	1.27561376431634e-16
2008025	0	9.73812516247728e-17	1.15908207378267e-16
2008025	1	9.06202137185171e-17	1.07317207012355e-16
2008025	2	8.40271835353497e-17	9.88618517251336e-17
2008025	3	7.55944075666028e-17	8.82994924133909e-17
2008025	4	6.24043226058706e-17	7.22699785812392e-17
2008025	5	4.64208162290303e-17	5.23268682839748e-17
2008025	6	2.95466416276508e-17	3.22314241304575e-17
2008025	7	1.59081779254917e-17	1.6879419082356e-17
2008025	8	7.85242998408183e-18	8.21116838371469e-18
2008025	9	3.65478561424289e-18	3.81250818725689e-18
2008025	10	1.75817896434229e-18	1.8456367436479e-18
2008025	11	1.06409455357238e-18	1.12895688952018e-18
2008025	12	6.51870671170322e-19	6.9111729824492e-19
2008025	13	5.33665186084294e-19	5.64934607555593e-19
2008025	14	3.79105541133099e-19	3.99381356081509e-19
2008025	15	2.33419147611547e-19	2.44810979519207e-19
2008025	16	1.25353018829208e-19	1.31104612379055e-19
2008025	17	6.41190814715414e-20	6.70788538328739e-20
2008025	18	3.52975706520529e-20	3.71174955749472e-20
2008025	19	2.29489978349429e-20	2.44490569061548e-20
2008025	20	2.0138875186969e-20	2.17758793989357e-20
2008025	21	2.25800075614197e-20	2.46886520669796e-20
2008025	22	2.51385617933391e-20	2.75004054714569e-20
2008025	23	3.12174305241307e-20	3.41110537113242e-20
2008026	0	3.76241827556435e-20	4.07965393290176e-20
2008026	1	4.33144676825707e-20	4.64632241093515e-20
2008026	2	5.28178940743527e-20	5.5702481323531e-20
2008026	3	7.68549111411666e-20	8.04226050330454e-20
2008026	4	1.16510706290099e-19	1.21931435003055e-19
2008026	5	1.80507257491626e-19	1.91133018916976e-19
2008026	6	2.78745115569156e-19	2.96988637818009e-19
2008026	7	1.03890507522288e-18	1.20150525888652e-18
2008026	8	5.57943836585802e-18	6.48983929470362e-18
2008026	9	9.57086023398153e-18	1.1021965361232e-17
2008026	10	4.22670768932611e-17	5.18311058791875e-17
2008026	11	5.76522934088561e-17	7.78552986375097e-17
2008026	12	8.78256135967172e-17	1.13605291741132e-16
2008026	13	1.03505039070789e-16	1.34426040297591e-16
2008026	14	1.13222343569679e-16	1.47726396906567e-16
2008026	15	1.23311399719645e-16	1.63769042389269e-16
2008026	16	6.18335687041198e-17	8.34800836956132e-17
2008026	17	1.14235113823741e-16	1.54211402471557e-16
2008026	18	1.16451516201325e-16	1.52187763335317e-16
2008026	19	9.41818152795571e-17	1.16283175395957e-16
2008026	20	8.72307857559279e-17	1.06480309527093e-16
2008026	21	7.69979346846411e-17	9.30584326385643e-17
2008026	22	6.60492247010288e-17	7.86811652135841e-17
2008026	23	5.9218836656283e-17	6.97195026143117e-17
2008027	0	5.62285244891372e-17	6.58178846644524e-17
2008027	1	5.35031171938856e-17	6.22470345436286e-17
2008027	2	4.90673873395055e-17	5.66496064484376e-17
2008027	3	4.12386192079231e-17	4.7257600078281e-17
2008027	4	2.92487152681305e-17	3.26042341748564e-17
2008027	5	2.41496774244983e-17	2.64119357382167e-17
2008027	6	2.09052431552828e-17	2.25967792402811e-17
2008027	7	1.80353178035198e-17	1.92187171118842e-17
2008027	8	1.66071253710411e-17	1.77041972268919e-17
2008027	9	1.45364945275068e-17	1.53350372243165e-17
2008027	10	1.22488160505622e-17	1.28396992564529e-17
2008027	11	1.04930649890879e-17	1.09725922322138e-17
2008027	12	9.16711655065105e-18	9.54944859908502e-18
2008027	13	7.79633046073266e-18	8.24663748641004e-18
2008027	14	6.96020388474963e-18	7.43769372149482e-18
2008027	15	6.79573552008512e-18	7.33187273623196e-18
2008027	16	6.47922049132208e-18	6.97750798380695e-18
2008027	17	5.83621196389687e-18	6.23908352063085e-18
2008027	18	5.19654098005057e-18	5.56620428524964e-18
2008027	19	4.51887570247212e-18	4.84745966633937e-18
2008027	20	3.78507320728139e-18	4.0463089652927e-18
2008027	21	2.9747676537086e-18	3.16503169606327e-18
2008027	22	2.14469670407418e-18	2.2528090484143e-18
2008027	23	1.43210945328667e-18	1.49580613361869e-18
2008028	0	9.75120454910441e-19	1.0161720337284e-18
2008028	1	6.71400780538515e-19	6.97527455397746e-19
2008028	2	4.74487254479658e-19	4.93244953906002e-19
2008028	3	3.95086236968008e-19	4.11695386444035e-19
2008028	4	4.02503846894957e-19	4.21316830556457e-19
2008028	5	4.81365556310914e-19	5.12083415723667e-19
2008028	6	6.55212548649803e-19	7.08633083338235e-19
2008028	7	9.95244340219617e-19	1.09352214090236e-18
2008028	8	1.80315333569085e-18	2.01880489253691e-18
2008028	9	2.78504353755817e-18	3.15152718701453e-18
2008028	10	4.09480258454791e-18	4.67029885925855e-18
2008028	11	6.26485335042947e-18	7.28248644133152e-18
2008028	12	8.84629890446275e-18	1.03161455482453e-17
2008028	13	1.10919614283349e-17	1.30438362336737e-17
2008028	14	1.28727598031873e-17	1.51462012161082e-17
2008028	15	1.4278701669618e-17	1.67930154919823e-17
2008028	16	1.56788457565672e-17	1.87636886918669e-17
2008028	17	1.82585701362405e-17	2.2319127463762e-17
2008028	18	2.24326173012498e-17	2.77448450938069e-17
2008028	19	2.5910649682238e-17	3.22061110480948e-17
2008028	20	2.79785997062548e-17	3.44206683258115e-17
2008028	21	2.8725956026022e-17	3.55012801221096e-17
2008028	22	2.93979605036094e-17	3.61244456217848e-17
2008028	23	3.02098592680689e-17	3.68549185740414e-17
2008029	0	3.12481751139361e-17	3.82546834235249e-17
2008029	1	3.16430162339736e-17	3.978342370041e-17
2008029	2	3.20176551717525e-17	4.13647270722562e-17
2008029	3	3.32465291446765e-17	4.38216705784565e-17
2008029	4	3.46146844019445e-17	4.62263634397753e-17
2008029	5	3.6312594027887e-17	4.90102470251478e-17
2008029	6	3.79379674548345e-17	5.23475948205799e-17
2008029	7	3.81935747883591e-17	5.41690002173647e-17
2008029	8	3.80922563485601e-17	5.41605262797547e-17
2008029	9	3.71074783005455e-17	5.35614975080133e-17
2008029	10	3.63039760409608e-17	5.26210642321951e-17
2008029	11	3.54420105894091e-17	5.1763162421669e-17
2008029	12	3.32340286097209e-17	4.83120689263642e-17
2008029	13	3.07015779181023e-17	4.38485770898942e-17
2008029	14	2.86068168100147e-17	4.05806560650284e-17
2008029	15	2.72238489869425e-17	3.79048605931818e-17
2008029	16	2.60921120511971e-17	3.77963780202104e-17
2008029	17	2.58276311741746e-17	3.8091734358585e-17
2008029	18	2.48982013740099e-17	3.83132967979942e-17
2008029	19	2.44027425574957e-17	3.83957922284862e-17
2008029	20	2.51354339304735e-17	3.85215843912668e-17
2008029	21	2.71413974635984e-17	4.0178046172373e-17
2008029	22	2.92982568510048e-17	4.22288689731881e-17
2008029	23	3.12726307131594e-17	4.32680375278138e-17
2008030	0	3.04611936470778e-17	4.05859190997978e-17
2008030	1	2.71015223708715e-17	3.34506778104676e-17
2008030	2	2.41004927795846e-17	2.63646706583267e-17
2008030	3	2.88670303480388e-17	3.10389828148311e-17
2008030	4	3.90504813806918e-17	4.37600128200042e-17
2008030	5	5.52779642176452e-17	6.451177733186e-17
2008030	6	6.537586189723e-17	7.77210508872342e-17
2008030	7	7.07249179741234e-17	8.38401462425028e-17
2008030	8	7.34207665930304e-17	8.70625039902668e-17
2008030	9	7.639054274221e-17	9.10731643719033e-17
2008030	10	7.8606334974192e-17	9.43868119598131e-17
2008030	11	7.96658355894537e-17	9.59544225345035e-17
2008030	12	8.2352065202522e-17	1.00243713710129e-16
2008030	13	8.67570537375102e-17	1.08564974022565e-16
2008030	14	8.94579725751521e-17	1.15835305139222e-16
2008030	15	1.00054006160072e-16	1.3396411247385e-16
2008030	16	1.00308521983173e-16	1.35550271655041e-16
2008030	17	1.17323016744674e-16	1.54604647998351e-16
2008030	18	1.10147371046869e-16	1.41389814727117e-16
2008030	19	1.04946932729461e-16	1.32142977051029e-16
2008030	20	1.03094351719444e-16	1.29170314343769e-16
2008030	21	1.02042417468277e-16	1.27624129724863e-16
2008030	22	9.98438751768851e-17	1.2437731108132e-16
2008030	23	9.60021972157628e-17	1.17891180307989e-16
2008031	0	9.12755721373731e-17	1.09468528792311e-16
2008031	1	8.6279132420926e-17	1.02951476049573e-16
2008031	2	8.05097561192294e-17	9.59666076083393e-17
2008031	3	7.53200618469093e-17	9.05848891674794e-17
2008031	4	7.30082573088482e-17	8.68292216038013e-17
2008031	5	7.08896530162282e-17	8.3607686639862e-17
2008031	6	6.90882110338527e-17	8.07665306208076e-17
2008031	7	6.73010943039209e-17	7.87025501560443e-17
2008031	8	6.60878368972679e-17	7.7255316705615e-17
2008031	9	6.71920050228311e-17	7.68559658617691e-17
2008031	10	6.7338496567962e-17	7.75279744654899e-17
2008031	11	6.59903348953924e-17	7.57980999211378e-17
2008031	12	6.42715533199649e-17	7.31162696482546e-17
2008031	13	5.81967446292756e-17	6.49469361866423e-17
2008031	14	4.99194475845315e-17	5.45120342875053e-17
2008031	15	4.50912042774132e-17	4.94707927758995e-17
2008031	16	4.30655893656755e-17	4.91252104768479e-17
2008031	17	3.54249932355527e-17	4.06620633669676e-17
2008031	18	4.49078038252473e-17	5.61610152662519e-17
2008031	19	1.0490169360635e-16	1.43853017491169e-16
2008031	20	7.33612725195106e-17	1.00373568009731e-16
2008031	21	1.11873826299051e-16	1.5338264210912e-16
2008031	22	1.12424777799956e-16	1.53885776883535e-16
2008031	23	1.0287714845476e-16	1.29983497786816e-16
2008032	0	8.32400017043072e-17	9.9880216682956e-17
2008032	1	7.84443305020542e-17	9.30123800031965e-17
2008032	2	1.12656006948785e-16	1.52041692881617e-16
2008032	3	1.25316241745671e-16	1.66936171595719e-16
2008032	4	1.04671561380498e-16	1.40980591812004e-16
2008032	5	1.12697296261374e-16	1.52285158938052e-16
2008032	6	6.25551787611677e-17	8.46052513819959e-17
2008032	7	9.89850021481372e-18	1.33716725474576e-17
2008032	8	4.91839346523921e-17	6.6333721629621e-17
2008032	9	6.10937028470712e-17	8.23623002258252e-17
2008032	10	1.26523550225099e-16	1.70564023760648e-16
2008032	11	1.26647643205091e-16	1.70577753159662e-16
2008032	12	1.26665140983375e-16	1.70640145286338e-16
2008032	13	1.26725743866922e-16	1.70580636341387e-16
2008032	14	1.16337729350981e-16	1.51251045347406e-16
2008032	15	1.05075216540901e-16	1.35221318258621e-16
2008032	16	1.0390795586177e-16	1.38397261203105e-16
2008032	17	5.14137832250885e-17	6.91259036067245e-17
2008032	18	8.16194546422954e-17	1.09320779702929e-16
2008032	19	1.0725707785067e-16	1.45067984671361e-16
2008032	20	9.21092001634896e-17	1.23184592433386e-16
2008032	21	1.11060320775327e-16	1.48463397241824e-16
2008032	22	9.31174167972931e-17	1.22525920772555e-16
2008032	23	7.77656134544232e-17	1.02874451652903e-16
2008033	0	1.01279689209294e-16	1.28043964000633e-16
2008033	1	9.38321652248108e-17	1.17290792771099e-16
2008033	2	8.56008513422687e-17	1.06993201423922e-16
2008033	3	7.60722423516661e-17	9.63620785349324e-17
2008033	4	6.56911023524186e-17	8.59316025974233e-17
2008033	5	7.23506061942487e-17	9.76254890705554e-17
2008033	6	1.26956061843388e-19	1.71484646661632e-19
2008033	7	1.25984929568851e-16	1.70353188033412e-16
2008033	8	9.29811653133552e-17	1.25420209524883e-16
2008033	9	1.05936676798298e-16	1.42759468527105e-16
2008033	10	1.01776168989008e-16	1.32079167173216e-16
2008033	11	1.09492773313468e-16	1.42789306354234e-16
2008033	12	9.97500239306141e-17	1.29463504594151e-16
2008033	13	8.28439284590515e-17	1.05782875215907e-16
2008033	14	7.15513881647947e-17	9.00287410702431e-17
2008033	15	6.88343368583679e-17	8.57920205376964e-17
2008033	16	7.23242293782713e-17	8.95455475093644e-17
2008033	17	8.93553443525552e-17	1.21580561313128e-16
2008033	18	1.28629968615473e-19	1.74126993760435e-19
2008033	19	1.27864978486779e-19	1.70994170115255e-19
2008033	20	3.96900402576903e-17	4.77499580962039e-17
2008033	21	4.2931397822704e-17	5.04847721452605e-17
2008033	22	4.05049621060218e-17	4.72420547333772e-17
2008033	23	3.84483855453877e-17	4.45547106116715e-17
2008034	0	3.66601071288726e-17	4.24162640550056e-17
2008034	1	3.67919406346449e-17	4.19582184022467e-17
2008034	2	4.01842518214025e-17	4.48427232741534e-17
2008034	3	4.32380847089422e-17	4.81089656591045e-17
2008034	4	4.55217414952731e-17	5.09154039227127e-17
2008034	5	4.8688737092494e-17	5.47624204722464e-17
2008034	6	5.41214826547152e-17	6.01964885294138e-17
2008034	7	6.04344670490922e-17	6.65268755149305e-17
2008034	8	6.57561524861277e-17	7.29308352536461e-17
2008034	9	6.95733356206769e-17	7.93947521519902e-17
2008034	10	7.34319955779667e-17	8.56362625273004e-17
2008034	11	7.62889461716062e-17	9.07771861018529e-17
2008034	12	7.66457757214036e-17	9.5123136027504e-17
2008034	13	7.7449327884935e-17	9.77060892537666e-17
2008034	14	7.85161644988176e-17	9.71304714977416e-17
2008034	15	7.61648302572734e-17	9.31369684345885e-17
2008034	16	7.19123124744645e-17	8.64169025165454e-17
2008034	17	6.8886556744204e-17	8.07880031436893e-17
2008034	18	6.76458634040629e-17	7.7649256494178e-17
2008034	19	6.72551893459939e-17	7.57951856274154e-17
2008034	20	6.71289168343688e-17	7.41617370476266e-17
2008034	21	6.53773532229158e-17	7.1677127489557e-17
2008034	22	6.28226201217437e-17	6.80878819020166e-17
2008034	23	6.01027772294687e-17	6.50941759759642e-17
2008035	0	5.7512784724953e-17	6.2544633507108e-17
2008035	1	5.47000328597745e-17	5.98417841486463e-17
2008035	2	5.15650304639188e-17	5.64284333635087e-17
2008035	3	4.78999535316135e-17	5.19831444694702e-17
2008035	4	4.34160934234638e-17	4.68013962288727e-17
2008035	5	3.95377200290246e-17	4.25189283008762e-17
2008035	6	3.71427519116407e-17	4.0029971534473e-17
2008035	7	3.56475113189139e-17	3.84612416520379e-17
2008035	8	3.44970661652459e-17	3.71388943561754e-17
2008035	9	3.33410098107803e-17	3.58318464952438e-17
2008035	10	3.23961014909782e-17	3.47347763215765e-17
2008035	11	3.16993491705961e-17	3.39781559828233e-17
2008035	12	3.16084134638475e-17	3.40842299044093e-17
2008035	13	3.26414526765541e-17	3.54645855028316e-17
2008035	14	3.38429534858448e-17	3.67617362303744e-17
2008035	15	3.35224587479508e-17	3.65820171664216e-17
2008035	16	3.11336879414497e-17	3.4484278394427e-17
2008035	17	3.01003086105536e-17	3.35519567310405e-17
2008035	18	3.84540670043306e-17	4.3917014119381e-17
2008035	19	5.9338089088234e-17	7.26003225047103e-17
2008035	20	8.16949885270219e-17	1.03346318476028e-16
2008035	21	1.00393704790506e-16	1.28281791048399e-16
2008035	22	1.09166141983664e-16	1.45500913895018e-16
2008035	23	1.13939145557707e-16	1.58582009560901e-16
2008036	0	1.29440036857633e-16	1.83610834831126e-16
2008036	1	1.32326038421854e-16	1.85380316879816e-16
2008036	2	1.28674190445585e-16	1.82640426424064e-16
2008036	3	7.00762218016513e-17	9.90135572676427e-17
2008036	4	9.2497409130373e-17	1.16173877208514e-16
2008036	5	9.34578498942814e-17	1.14559927753706e-16
2008036	6	9.08960283172469e-17	1.11621347560199e-16
2008036	7	8.80681828958331e-17	1.09674593714974e-16
2008036	8	8.95247315321633e-17	1.10073525513231e-16
2008036	9	9.10575562196469e-17	1.11102127902069e-16
2008036	10	9.18481359851235e-17	1.09800302655905e-16
2008036	11	7.28418941436155e-17	8.58870000927073e-17
2008036	12	5.41216021513047e-17	5.90167115027762e-17
2008036	13	5.8527410440345e-17	6.69641164347542e-17
2008036	14	7.68117244713581e-17	9.42947633869079e-17
2008036	15	8.36268817019362e-17	1.04962704553181e-16
2008036	16	9.17449232444728e-17	1.17894510600634e-16
2008036	17	1.10517347274518e-16	1.51289772014988e-16
2008036	18	1.20935205729227e-16	1.7042640738069e-16
2008036	19	1.20576658449615e-16	1.70143914627936e-16
2008036	20	1.04407940971502e-16	1.43404490954085e-16
2008036	21	9.69906112947715e-17	1.29225534779306e-16
2008036	22	1.22007703108515e-16	1.69708416536498e-16
2008036	23	1.23398226840805e-16	1.7147393714698e-16
2008037	0	1.13255182581823e-16	1.53263142798291e-16
2008037	1	8.7281732125385e-17	1.14876139757011e-16
2008037	2	1.00131615248384e-16	1.34169775254707e-16
2008037	3	1.07431985438554e-16	1.40377485148889e-16
2008037	4	9.07754020399532e-17	1.14627210876732e-16
2008037	5	6.77092115344812e-17	8.21958117742877e-17
2008037	6	5.56170904839297e-17	6.55421637192719e-17
2008037	7	5.45329250366601e-17	6.30780257480696e-17
2008037	8	5.74973230136819e-17	6.69305901378375e-17
2008037	9	5.76786369770666e-17	6.68216817268683e-17
2008037	10	6.23145821787342e-17	7.2838259030188e-17
2008037	11	6.81871438082815e-17	8.10538798819354e-17
2008037	12	7.17834106799661e-17	8.55652065308021e-17
2008037	13	8.07805785431805e-17	9.81549405178737e-17
2008037	14	9.3082647646287e-17	1.15476499552992e-16
2008037	15	1.12529540815789e-16	1.43514149862995e-16
2008037	16	1.27967997529818e-16	1.70441841969056e-16
2008037	17	1.20419374835757e-16	1.55394656471332e-16
2008037	18	1.1583636819717e-16	1.49261865727812e-16
2008037	19	8.78298891377001e-17	1.07128162553673e-16
2008037	20	8.69453623848231e-17	1.06704275106919e-16
2008037	21	1.05976516729992e-16	1.37386775798183e-16
2008037	22	1.19932468154822e-16	1.62156545128534e-16
2008037	23	9.88596106868723e-17	1.24486428016068e-16
2008038	0	1.04392790265395e-16	1.31257471523742e-16
2008038	1	1.06840744245243e-16	1.3380191324227e-16
2008038	2	1.0878462073832e-16	1.36117045042292e-16
2008038	3	1.10863555105216e-16	1.38898140428976e-16
2008038	4	1.12285104731446e-16	1.41518804974838e-16
2008038	5	1.16669187911235e-16	1.50553428900099e-16
2008038	6	1.16794697761564e-16	1.53077797600421e-16
2008038	7	1.25932539187093e-16	1.70407710857656e-16
2008038	8	1.26627521580065e-16	1.70798722092736e-16
2008038	9	1.10716533411169e-16	1.46337073976534e-16
2008038	10	1.0082886523616e-16	1.26328340380636e-16
2008038	11	9.31282094157567e-17	1.12400721029165e-16
2008038	12	8.69845736258091e-17	1.02201993541151e-16
2008038	13	8.21776991245981e-17	9.53158158507991e-17
2008038	14	7.88384558245469e-17	9.10025966760908e-17
2008038	15	7.57575179122403e-17	8.79283960119646e-17
2008038	16	7.33173477198224e-17	8.44882225061136e-17
2008038	17	7.08673212778959e-17	8.16320737220178e-17
2008038	18	6.76831355988027e-17	7.85860619120065e-17
2008038	19	6.56968310764294e-17	7.61480684761411e-17
2008038	20	6.42455065444473e-17	7.42987165707068e-17
2008038	21	6.2914479656466e-17	7.31206481245388e-17
2008038	22	6.24049937632068e-17	7.21795182772841e-17
2008038	23	6.22418191740622e-17	7.10179631793689e-17
2008039	0	6.26837802819348e-17	7.03119417077966e-17
2008039	1	6.43917727592664e-17	7.1902501070261e-17
2008039	2	6.63778451296565e-17	7.63267303005695e-17
2008039	3	6.94863085592687e-17	8.22401379287977e-17
2008039	4	7.23303571564182e-17	8.73731494857347e-17
2008039	5	7.33718598685009e-17	9.15759849247343e-17
2008039	6	7.36704320528289e-17	9.51124296691729e-17
2008039	7	7.46639986730054e-17	9.68860580625644e-17
2008039	8	7.35551493376333e-17	9.5290855469654e-17
2008039	9	7.25984744312174e-17	9.39375273756397e-17
2008039	10	7.22246775559201e-17	9.28055358541499e-17
2008039	11	7.33222117358343e-17	9.22152056406869e-17
2008039	12	7.30510739823989e-17	9.12251248348868e-17
2008039	13	7.32189957795194e-17	9.04311513235449e-17
2008039	14	7.27244165328601e-17	8.97037618476028e-17
2008039	15	7.31858912813316e-17	8.88621321885755e-17
2008039	16	7.36369627245261e-17	8.80689192386772e-17
2008039	17	7.22769710297493e-17	8.76816937913476e-17
2008039	18	7.02207305195708e-17	8.65688642937885e-17
2008039	19	6.80521496464582e-17	8.54741578134476e-17
2008039	20	6.6642525149831e-17	8.6151447522374e-17
2008039	21	6.6591021210076e-17	8.80439043193974e-17
2008039	22	6.71341635899147e-17	8.97567004367473e-17
2008039	23	6.82615896541605e-17	9.13308129475587e-17
2008040	0	7.00427751780043e-17	9.30159820148104e-17
2008040	1	7.20999910373373e-17	9.51495611327286e-17
2008040	2	7.19001508311167e-17	9.74700720931569e-17
2008040	3	7.20231550045707e-17	9.96461556305199e-17
2008040	4	7.42529750942993e-17	1.02089397623363e-16
2008040	5	7.70869665564469e-17	1.04949613126561e-16
2008040	6	7.96100156827705e-17	1.07730606220568e-16
2008040	7	8.20185663749844e-17	1.10025718696986e-16
2008040	8	8.54485754131234e-17	1.11566847718028e-16
2008040	9	8.72517018473855e-17	1.12580815550669e-16
2008040	10	8.81313955119438e-17	1.13223717514446e-16
2008040	11	8.82558523956191e-17	1.13418609828221e-16
2008040	12	8.79184750749131e-17	1.13420367109111e-16
2008040	13	8.72008479163394e-17	1.12861826255915e-16
2008040	14	8.68460372967859e-17	1.11863088281119e-16
2008040	15	8.56054121840389e-17	1.09851272579993e-16
2008040	16	8.40622869764995e-17	1.07442643653436e-16
2008040	17	8.19946924248288e-17	1.04741092610494e-16
2008040	18	8.0007160696737e-17	1.01556298263144e-16
2008040	19	7.76249431297464e-17	9.74702461689646e-17
2008040	20	7.51693758534906e-17	9.4557286000729e-17
2008040	21	7.31830014855059e-17	9.23975079555903e-17
2008040	22	7.14841571629037e-17	9.081429260372e-17
2008040	23	7.02311909716992e-17	8.94840743534043e-17
2008041	0	6.92185538132015e-17	8.83271527354985e-17
2008041	1	6.85510263960174e-17	8.7371210811876e-17
2008041	2	6.78080622134207e-17	8.65547035341295e-17
2008041	3	6.72027420588472e-17	8.59236549829142e-17
2008041	4	6.64180027105752e-17	8.55943048028144e-17
2008041	5	6.62881899693433e-17	8.5465682770936e-17
2008041	6	6.64862802534345e-17	8.53248584235424e-17
2008041	7	6.63629929071462e-17	8.50332884323237e-17
2008041	8	6.61725575366033e-17	8.45287646749963e-17
2008041	9	6.60064399675066e-17	8.36882130982621e-17
2008041	10	6.49566657929558e-17	8.25205538217322e-17
2008041	11	6.35675017527278e-17	8.10235012447367e-17
2008041	12	6.2761606283637e-17	7.98126396437179e-17
2008041	13	6.23265973049565e-17	7.86929762601527e-17
2008041	14	6.18297078318807e-17	7.77953232900697e-17
2008041	15	6.06779218847584e-17	7.59956297210732e-17
2008041	16	5.92344239994495e-17	7.41883753097004e-17
2008041	17	5.81712159564611e-17	7.31488444745185e-17
2008041	18	5.74360841640453e-17	7.23874122342978e-17
2008041	19	5.67726940465775e-17	7.17573436852597e-17
2008041	20	5.60566914725833e-17	7.12077584058313e-17
2008041	21	5.54990720329355e-17	7.07144402785488e-17
2008041	22	5.48596463624217e-17	7.02106461536497e-17
2008041	23	5.42134386734314e-17	6.95669030282758e-17
2008042	0	5.33642216461717e-17	6.87469743810947e-17
2008042	1	5.24042440180875e-17	6.77440323742999e-17
2008042	2	5.12992083947661e-17	6.66915016356522e-17
2008042	3	5.02566522497138e-17	6.56949763694608e-17
2008042	4	4.93048757862946e-17	6.47451751337368e-17
2008042	5	4.85257426916342e-17	6.38857459773221e-17
2008042	6	4.75947992929048e-17	6.31258872256571e-17
2008042	7	4.69529733426593e-17	6.24575036502475e-17
2008042	8	4.63867954104041e-17	6.17657197823064e-17
2008042	9	4.58378483617399e-17	6.09496922477637e-17
2008042	10	4.52688719398602e-17	6.00034668360935e-17
2008042	11	4.45505606847084e-17	5.88276139259502e-17
2008042	12	4.35110130892325e-17	5.74183929198799e-17
2008042	13	4.18283644753858e-17	5.60061234325069e-17
2008042	14	3.96258868763052e-17	5.46496630003097e-17
2008042	15	3.74037788166433e-17	5.43372705063553e-17
2008042	16	3.49403803486353e-17	5.40497907791608e-17
2008042	17	3.38918965374853e-17	5.37772395617767e-17
2008042	18	3.36795776841424e-17	5.30630967549228e-17
2008042	19	3.37789374381112e-17	5.26247087305721e-17
2008042	20	3.45507536957584e-17	5.33520561265283e-17
2008042	21	3.65858097090645e-17	5.66124060712101e-17
2008042	22	3.76738932283118e-17	5.77090780733858e-17
2008042	23	3.90565284215317e-17	5.81327304180202e-17
2008043	0	3.96651039821786e-17	5.85259185404285e-17
2008043	1	3.99808266947734e-17	5.86425470457013e-17
2008043	2	4.08122597031048e-17	5.86506108263417e-17
2008043	3	4.1684461846121e-17	5.87495670941473e-17
2008043	4	4.19903916570172e-17	5.86906081602276e-17
2008043	5	4.24527940301813e-17	5.91552297024509e-17
2008043	6	4.26738392162562e-17	5.95856717007929e-17
2008043	7	4.22878855432685e-17	5.91129582329381e-17
2008043	8	4.22837682968029e-17	5.88361592448593e-17
2008043	9	4.21769534178309e-17	5.89836637950776e-17
2008043	10	4.20885928880483e-17	5.88402003536783e-17
2008043	11	4.17717854408472e-17	5.85115256532539e-17
2008043	12	4.11865586611992e-17	5.78066842076679e-17
2008043	13	4.01946170591852e-17	5.67474113998797e-17
2008043	14	3.92998400489803e-17	5.60173344979135e-17
2008043	15	3.87787387184684e-17	5.59829397421086e-17
2008043	16	3.82268056945065e-17	5.60394585943057e-17
2008043	17	3.78007276978851e-17	5.57268460847576e-17
2008043	18	3.7670963879625e-17	5.53913716616824e-17
2008043	19	3.77340598639503e-17	5.52126860785182e-17
2008043	20	3.81149380528725e-17	5.52615053705685e-17
2008043	21	3.8490749526131e-17	5.51351586890204e-17
2008043	22	3.87463564884419e-17	5.49790655562996e-17
2008043	23	3.94277448500269e-17	5.51938182918634e-17
2008044	0	3.93490760388827e-17	5.55654630244006e-17
2008044	1	4.03490173222923e-17	5.6117358563801e-17
2008044	2	4.12595172265472e-17	5.64851036945141e-17
2008044	3	4.16613274644014e-17	5.67982899873901e-17
2008044	4	4.14647829524862e-17	5.68048777750772e-17
2008044	5	4.10276241552434e-17	5.72318248723951e-17
2008044	6	4.08429884669926e-17	5.7638853114582e-17
2008044	7	4.16971343334744e-17	5.88875777486318e-17
2008044	8	4.27514808507827e-17	5.99865813119798e-17
2008044	9	4.37384206704074e-17	6.09003950004694e-17
2008044	10	4.42589328917781e-17	6.15295427365122e-17
2008044	11	4.47618202144982e-17	6.20196396958651e-17
2008044	12	4.5029315699155e-17	6.24437161435482e-17
2008044	13	4.53379116425661e-17	6.25647984033782e-17
2008044	14	4.58023170650817e-17	6.23224249288901e-17
2008044	15	4.51203045016374e-17	6.16325009390416e-17
2008044	16	4.44238132194337e-17	6.04887776711238e-17
2008044	17	4.3045746454737e-17	5.87433060145262e-17
2008044	18	4.00893866229776e-17	5.63323723419373e-17
2008044	19	3.74832178971722e-17	5.39657541653798e-17
2008044	20	3.4718836645347e-17	5.21339790139882e-17
2008044	21	3.23984599795625e-17	5.06850006356303e-17
2008044	22	3.08992101877851e-17	4.94137335275598e-17
2008044	23	2.96468606872963e-17	4.87617536899516e-17
2008045	0	3.03259877349792e-17	4.86712662104319e-17
2008045	1	3.14504935789824e-17	4.87565744888214e-17
2008045	2	3.27245179043865e-17	4.89527020395903e-17
2008045	3	3.32329777370773e-17	4.88454582722993e-17
2008045	4	3.30119245558291e-17	4.83426391650644e-17
2008045	5	3.13396264973973e-17	4.75707780894877e-17
2008045	6	2.95091169910152e-17	4.69255800647884e-17
2008045	7	2.89132244771213e-17	4.51486863451928e-17
2008045	8	2.87470995862651e-17	4.33508253569883e-17
2008045	9	2.86323562388859e-17	4.12798610306205e-17
2008045	10	2.76811719929277e-17	3.82626368778914e-17
2008045	11	2.59207009045074e-17	3.50015234779221e-17
2008045	12	2.43444990380486e-17	3.18103980676509e-17
2008045	13	2.28553806519865e-17	2.8765671409918e-17
2008045	14	2.12109037020375e-17	2.57147209168884e-17
2008045	15	1.89565218861325e-17	2.26446954677843e-17
2008045	16	1.66471858626204e-17	1.96056255109599e-17
2008045	17	1.49033648630966e-17	1.7233660399403e-17
2008045	18	1.27525417008287e-17	1.45227562716739e-17
2008045	19	1.05929473295278e-17	1.20168392137564e-17
2008045	20	8.90032000449876e-18	1.00898295586003e-17
2008045	21	7.67305536272943e-18	8.66275302795923e-18
2008045	22	6.76639214658423e-18	7.5727224492582e-18
2008045	23	6.32651038986982e-18	7.12471355058858e-18
2008046	0	5.43557655741381e-18	5.9459430671151e-18
2008046	1	4.13028995264136e-18	4.44956547302019e-18
2008046	2	2.8496244225041e-18	3.04359466631696e-18
2008046	3	2.09234302717202e-18	2.23351139166755e-18
2008046	4	1.62813825594062e-18	1.74801444063839e-18
2008046	5	1.21530381543602e-18	1.3109015773661e-18
2008046	6	8.58398027828844e-19	9.2689490732858e-19
2008046	7	6.05899748316845e-19	6.55296376207477e-19
2008046	8	4.68051586498989e-19	5.08154299900924e-19
2008046	9	4.20496769302163e-19	4.61747722577478e-19
2008046	10	4.32458693131485e-19	4.82757219768522e-19
2008046	11	4.72476498449124e-19	5.32664847557445e-19
2008046	12	5.22831463241483e-19	5.91293038604213e-19
2008046	13	5.72568565302816e-19	6.47480012177116e-19
2008046	14	6.16178440202305e-19	6.93760342539485e-19
2008046	15	6.71484973307588e-19	7.58963888890371e-19
2008046	16	7.05103124922753e-19	7.91857008658511e-19
2008046	17	7.38185553692254e-19	8.21330206903182e-19
2008046	18	7.83051308141575e-19	8.61897929171497e-19
2008046	19	8.44180948171209e-19	9.24052394652359e-19
2008046	20	9.16650963444353e-19	1.00637614797257e-18
2008046	21	9.9478427368118e-19	1.10072426069437e-18
2008046	22	1.07116619683549e-18	1.19106329058906e-18
2008046	23	1.14440166166966e-18	1.2756792809289e-18
2008047	0	1.22178290446695e-18	1.36750441424057e-18
2008047	1	1.2985120723355e-18	1.4570199901578e-18
2008047	2	1.36740281880169e-18	1.53462438417254e-18
2008047	3	1.43404151816504e-18	1.61423274099746e-18
2008047	4	1.49858872343928e-18	1.69284823726114e-18
2008047	5	1.57193592199875e-18	1.77865927895408e-18
2008047	6	1.66863695375475e-18	1.88995060325401e-18
2008047	7	1.80487134650885e-18	2.0434361086825e-18
2008047	8	1.98620890066304e-18	2.24624451979272e-18
2008047	9	2.21427933051777e-18	2.50603943837202e-18
2008047	10	2.49763902660995e-18	2.82938617286697e-18
2008047	11	2.82718634619116e-18	3.19756148305965e-18
2008047	12	3.1034536864036e-18	3.51290831011934e-18
2008047	13	3.46390697754643e-18	3.87659818913948e-18
2008047	14	3.79726187135063e-18	4.22231919277234e-18
2008047	15	4.03105980808753e-18	4.47526443047711e-18
2008047	16	4.33658700349623e-18	4.80197315659601e-18
2008047	17	4.74964242593912e-18	5.24761120569842e-18
2008047	18	5.1724610015389e-18	5.72163911421002e-18
2008047	19	5.70137212457907e-18	6.32766255789112e-18
2008047	20	6.32017239540147e-18	7.06227678197628e-18
2008047	21	7.01669028415725e-18	7.87575584871907e-18
2008047	22	7.7980097369371e-18	8.74445891099959e-18
2008047	23	8.56922076100315e-18	9.59682382887751e-18
2008048	0	9.28129597301812e-18	1.03511573078987e-17
2008048	1	9.94150067929457e-18	1.09575564050955e-17
2008048	2	1.04182485310522e-17	1.13881607249471e-17
2008048	3	1.0574202828512e-17	1.16246502029339e-17
2008048	4	1.05450240738843e-17	1.17108349433368e-17
2008048	5	1.04993828019933e-17	1.16389688438967e-17
2008048	6	1.00558612909167e-17	1.12482567624241e-17
2008048	7	9.49788916221226e-18	1.0666601422944e-17
2008048	8	9.23000118934577e-18	1.02243131070001e-17
2008048	9	8.91467896323841e-18	9.8036135845699e-18
2008048	10	8.6452070760394e-18	9.35082178946649e-18
2008048	11	8.15565786878232e-18	8.77266613284028e-18
2008048	12	7.37888149027371e-18	8.04048084393759e-18
2008048	13	6.34218922938738e-18	7.01667371370757e-18
2008048	14	5.48731852735293e-18	6.26469641828157e-18
2008048	15	5.58925527415831e-18	6.43639417771421e-18
2008048	16	6.74813369802601e-18	8.04819998960396e-18
2008048	17	9.15223219824633e-18	1.12319517264371e-17
2008048	18	1.25948571581792e-17	1.54865519771144e-17
2008048	19	1.5395391346746e-17	1.97483120572082e-17
2008048	20	1.86705599917615e-17	2.34957905698661e-17
2008048	21	2.14180350414885e-17	2.6494970226511e-17
2008048	22	2.22520943629002e-17	2.78436641410365e-17
2008048	23	2.17148336890802e-17	2.73669211107961e-17
2008049	0	2.03462917460048e-17	2.55805068676504e-17
2008049	1	1.87625751341629e-17	2.35740000202758e-17
2008049	2	1.73648761100755e-17	2.18332878026475e-17
2008049	3	1.62712658431945e-17	2.03105236960737e-17
2008049	4	1.47614460243636e-17	1.82113571661923e-17
2008049	5	1.30951325026992e-17	1.59606395313845e-17
2008049	6	1.19863604700343e-17	1.44829827859281e-17
2008049	7	1.13314956221306e-17	1.35209568780793e-17
2008049	8	1.07500545303193e-17	1.27166108404241e-17
2008049	9	1.02564557259053e-17	1.20504751273344e-17
2008049	10	9.88716176860463e-18	1.15098437089872e-17
2008049	11	9.4981436194817e-18	1.10338090421282e-17
2008049	12	9.06872734085256e-18	1.05489645560271e-17
2008049	13	8.60996669028224e-18	9.98914175257853e-18
2008049	14	8.1528699728705e-18	9.38655841205011e-18
2008049	15	7.54619048652015e-18	8.71851315944866e-18
2008049	16	6.88759505476378e-18	7.94023915298504e-18
2008049	17	6.20925114557652e-18	7.1480900749551e-18
2008049	18	5.72587073031823e-18	6.51356394722249e-18
2008049	19	5.26850580813209e-18	5.94513508927374e-18
2008049	20	4.76544213124494e-18	5.29632684767742e-18
2008049	21	4.42442022962335e-18	4.82892590223343e-18
2008049	22	4.22864838797045e-18	4.61699181853064e-18
2008049	23	4.14736497728921e-18	4.70571211997938e-18
2008050	0	4.30134352185919e-18	5.07121541786048e-18
2008050	1	4.69474637742383e-18	5.66382975825874e-18
2008050	2	5.15607872869083e-18	6.34258548564923e-18
2008050	3	5.5733987972383e-18	6.9511641791805e-18
2008050	4	5.88603698909987e-18	7.44395663043636e-18
2008050	5	6.11936952679538e-18	7.83398611011375e-18
2008050	6	6.33056976642155e-18	8.16757209468991e-18
2008050	7	6.56488296762576e-18	8.49374890238652e-18
2008050	8	6.84812840190443e-18	8.81033250348274e-18
2008050	9	7.09882817606488e-18	9.2033491633745e-18
2008050	10	7.58162629697048e-18	9.75934754658338e-18
2008050	11	8.14463562129379e-18	1.04982450485596e-17
2008050	12	8.79343535700002e-18	1.12567916441277e-17
2008050	13	9.49708380112596e-18	1.20245659989926e-17
2008050	14	1.03447817920078e-17	1.30016660777895e-17
2008050	15	1.13834181436682e-17	1.43798254528021e-17
2008050	16	1.26796289788235e-17	1.63667461842492e-17
2008050	17	1.34227002056666e-17	1.75863005449703e-17
2008050	18	1.40273559163414e-17	1.85538716663838e-17
2008050	19	1.45174178817672e-17	1.92660964394157e-17
2008050	20	1.46810365298367e-17	1.9643547227911e-17
2008050	21	1.41822592006085e-17	1.92785729006618e-17
2008050	22	1.31302765625918e-17	1.82873467034076e-17
2008050	23	1.19011178560716e-17	1.71804949805936e-17
2008051	0	1.12161352603603e-17	1.60916046383423e-17
2008051	1	1.08152708888616e-17	1.4924006419044e-17
2008051	2	1.00694639024127e-17	1.37019015852752e-17
2008051	3	9.60036653799179e-18	1.28782701233624e-17
2008051	4	9.41765505101506e-18	1.24218240668654e-17
2008051	5	9.51015043249968e-18	1.23586062801366e-17
2008051	6	9.61224265969349e-18	1.24067130668496e-17
2008051	7	9.58015839899327e-18	1.23742887152776e-17
2008051	8	9.51530557130901e-18	1.2252547251715e-17
2008051	9	9.49386763428628e-18	1.20282118257722e-17
2008051	10	9.53867375881554e-18	1.18976011299601e-17
2008051	11	9.59225433297487e-18	1.18876752549889e-17
2008051	12	9.65650021432999e-18	1.19169425612886e-17
2008051	13	9.73648555267698e-18	1.19961277390182e-17
2008051	14	9.9299408421979e-18	1.21965806505671e-17
2008051	15	1.03189372969753e-17	1.27912781715311e-17
2008051	16	1.08393670965524e-17	1.35445280525748e-17
2008051	17	1.12850787588815e-17	1.42233428497966e-17
2008051	18	1.18054772072345e-17	1.49152931960752e-17
2008051	19	1.22704737801786e-17	1.56063805742423e-17
2008051	20	1.28252264603571e-17	1.62894990381032e-17
2008051	21	1.3437226310185e-17	1.69587222901005e-17
2008051	22	1.40763586250738e-17	1.77402507092955e-17
2008051	23	1.52322366238032e-17	1.89455799349176e-17
2008052	0	1.66308499227362e-17	2.04970395875063e-17
2008052	1	1.77654485155726e-17	2.1859696424576e-17
2008052	2	1.81178412196228e-17	2.25288335965621e-17
2008052	3	1.81357148343101e-17	2.26416339835034e-17
2008052	4	1.85481704968657e-17	2.26686029764086e-17
2008052	5	1.85688322333781e-17	2.26948679232809e-17
2008052	6	1.76034029145189e-17	2.15966910891257e-17
2008052	7	1.55775582834584e-17	1.94685615464498e-17
2008052	8	1.30382147815954e-17	1.6762400990004e-17
2008052	9	1.21211213853316e-17	1.40301088650715e-17
2008052	10	1.02398262280545e-17	1.14993879203079e-17
2008052	11	8.34870354433176e-18	9.34395799815799e-18
2008052	12	6.72953200279908e-18	7.47132583017643e-18
2008052	13	5.34394273646166e-18	5.97102101336942e-18
2008052	14	4.25917160563652e-18	4.74126996835927e-18
2008052	15	3.17691296579663e-18	3.47822047256099e-18
2008052	16	1.78432022884529e-18	1.93202915632288e-18
2008052	17	7.51052072786762e-19	7.93891961949737e-19
2008052	18	3.05028110079309e-19	3.21354865942215e-19
2008052	19	1.84337814497866e-19	1.95981656061272e-19
2008052	20	1.26195213335439e-19	1.3471568661102e-19
2008052	21	9.95141986356368e-20	1.06592760471362e-19
2008052	22	9.45796334664287e-20	1.05042553091666e-19
2008052	23	1.52925487548229e-19	1.85007412997556e-19
2008053	0	4.80930227819186e-19	6.03421342744379e-19
2008053	1	1.04707452372015e-18	1.29285201042271e-18
2008053	2	1.33185887491645e-17	1.71943197614793e-17
2008053	3	1.1570805378181e-16	1.49726119312051e-16
2008053	4	1.25951806105405e-16	1.72317093744339e-16
2008053	5	1.25725008823481e-16	1.52196154294425e-16
2008053	6	1.17657141884439e-16	1.38932994785074e-16
2008053	7	1.04737327183903e-16	1.23843180373302e-16
2008053	8	9.66515919425903e-17	1.11298289637318e-16
2008053	9	8.48665865446159e-17	9.54420980144364e-17
2008053	10	7.85264314397024e-17	9.63562769735469e-17
2008053	11	1.25039163800328e-16	1.74120220810582e-16
2008053	12	1.27571813441502e-16	1.75821665977096e-16
2008053	13	8.84884398746451e-17	1.07254906011183e-16
2008053	14	2.58880205396405e-17	2.93601476009165e-17
2008053	15	8.51308748257527e-18	9.10078142437486e-18
2008053	16	4.69603707022643e-17	5.44469561900863e-17
2008053	17	1.25974703771077e-16	1.70309920896332e-16
2008053	18	1.09873371132816e-16	1.4233780381987e-16
2008053	19	1.17463352735073e-16	1.50300994526914e-16
2008053	20	1.20338187549851e-16	1.53783645202614e-16
2008053	21	1.2537095911175e-16	1.59744416290208e-16
2008053	22	1.20583700415407e-16	1.50421075314848e-16
2008053	23	1.17255977759313e-16	1.45065329981865e-16
2008054	0	1.14765140122468e-16	1.41458161388565e-16
2008054	1	1.11276986005515e-16	1.36582914323247e-16
2008054	2	1.05718061069562e-16	1.2864712403711e-16
2008054	3	1.27249213836185e-16	1.70839399209931e-16
2008054	4	1.26519103599561e-16	1.70035335713427e-16
2008054	5	1.10870486675015e-16	1.41397143413931e-16
2008054	6	8.78519688474561e-17	1.05687979523069e-16
2008054	7	7.72133032987133e-17	9.05037863210772e-17
2008054	8	7.31066172078473e-17	8.47237267113294e-17
2008054	9	7.18097323644127e-17	8.24176226787394e-17
2008054	10	7.14722645160108e-17	8.13709218651594e-17
2008054	11	7.02020119444651e-17	7.9854406358765e-17
2008054	12	6.6895654501427e-17	7.62630971719489e-17
2008054	13	5.9247313861506e-17	6.82177698422893e-17
2008054	14	4.81845127885335e-17	5.575512709323e-17
2008054	15	3.50399101244346e-17	4.03318351601008e-17
2008054	16	2.22062708625614e-17	2.67783882327055e-17
2008054	17	1.38444433358058e-17	1.62941268882833e-17
2008054	18	6.82975515114068e-18	7.9057922623703e-18
2008054	19	4.70512806860362e-18	5.84883236082575e-18
2008054	20	4.05410943240934e-18	5.12735134422813e-18
2008054	21	3.94243038539954e-18	4.89737335191494e-18
2008054	22	3.99351052942318e-18	4.86616142082816e-18
2008054	23	4.58065392196622e-18	5.52346736188482e-18
2008055	0	5.86252972020367e-18	7.05334441329686e-18
2008055	1	7.7872485753445e-18	9.33354880985609e-18
2008055	2	9.96532895684083e-18	1.193169036731e-17
2008055	3	1.23041061916822e-17	1.49067380737625e-17
2008055	4	1.49541602737964e-17	1.85498348352046e-17
2008055	5	1.81898329199608e-17	2.24018500257458e-17
2008055	6	2.16393325729518e-17	2.6431202793683e-17
2008055	7	2.53776876274642e-17	3.06049457474341e-17
2008055	8	2.88398825689313e-17	3.47957552869608e-17
2008055	9	3.16385498355536e-17	3.84930085682196e-17
2008055	10	3.32529416332177e-17	4.19440744049893e-17
2008055	11	3.51042559652763e-17	4.55161789292674e-17
2008055	12	3.75013710022185e-17	4.98031762507713e-17
2008055	13	3.89093505284496e-17	5.38935415186539e-17
2008055	14	3.87716352957894e-17	5.67426492646069e-17
2008055	15	3.93718297932339e-17	5.78553255464225e-17
2008055	16	4.12455849979137e-17	5.90977934065425e-17
2008055	17	4.48064088711115e-17	6.48157196270017e-17
2008055	18	4.96432764497727e-17	7.36868695814107e-17
2008055	19	5.07968273977917e-17	7.86754052832839e-17
2008055	20	4.79092143924579e-17	7.63222148629304e-17
2008055	21	4.00979812310969e-17	4.79621915232887e-17
2008055	22	2.49293326513767e-17	2.7644573689603e-17
2008055	23	3.50738333955103e-17	4.04241167978576e-17
2008056	0	4.91365412699718e-17	5.88776229446987e-17
2008056	1	7.41512503708341e-17	9.4255861314086e-17
2008056	2	1.26998077025428e-16	1.7166805296103e-16
2008056	3	1.26930023915414e-16	1.71458606457813e-16
2008056	4	1.26424777164395e-16	1.71184678044409e-16
2008056	5	1.26486208953137e-16	1.71170651186233e-16
2008056	6	1.26472142272339e-16	1.71233819852437e-16
2008056	7	1.26077825582401e-16	1.71168255275132e-16
2008056	8	1.26133214038087e-16	1.71195317633818e-16
2008056	9	1.16999144860762e-16	1.53846796553247e-16
2008056	10	1.14462132326669e-16	1.44504586110898e-16
2008056	11	1.13052647324449e-16	1.39999937121084e-16
2008056	12	1.13136231488599e-16	1.39782341244832e-16
2008056	13	1.12758261237295e-16	1.39409037051005e-16
2008056	14	1.1142133274476e-16	1.36375676759454e-16
2008056	15	1.10256829281313e-16	1.33655403390264e-16
2008056	16	1.0840080618612e-16	1.30339660197686e-16
2008056	17	1.05836543314643e-16	1.27514763082613e-16
2008056	18	1.01698797084829e-16	1.23769865350602e-16
2008056	19	9.28520845917671e-17	1.18298708536984e-16
2008056	20	8.49898788257258e-17	1.10605770591026e-16
2008056	21	7.56741679727707e-17	9.79015284461783e-17
2008056	22	6.2161225516225e-17	8.19141972951056e-17
2008056	23	4.99276102660898e-17	6.78726799058079e-17
2008057	0	4.66209068992038e-17	6.23161556872108e-17
2008057	1	4.74091893062818e-17	6.51032396987076e-17
2008057	2	4.92064427822304e-17	7.14512342499362e-17
2008057	3	5.15794040597676e-17	7.55218464587387e-17
2008057	4	5.8553768485565e-17	8.63827551842249e-17
2008057	5	6.07449027103597e-17	8.93534462299249e-17
2008057	6	5.84882847874743e-17	8.2058236143988e-17
2008057	7	4.81843293145808e-17	6.06451834647658e-17
2008057	8	3.63033904555624e-17	3.97002694525919e-17
2008057	9	2.88849865109809e-17	3.03411690744304e-17
2008057	10	2.31175829397288e-17	2.38185633700487e-17
2008057	11	1.96950478851563e-17	2.10541267395957e-17
2008057	12	2.98680848398058e-17	3.45509703178283e-17
2008057	13	4.40184175814003e-17	5.17965615108205e-17
2008057	14	5.8610758369285e-17	6.74489516799304e-17
2008057	15	7.14207722484176e-17	8.16300504906163e-17
2008057	16	7.63072434161589e-17	8.64405856182092e-17
2008057	17	6.68817374590203e-17	7.4647660297054e-17
2008057	18	4.69261226887753e-17	5.20322380759935e-17
2008057	19	3.26025269243395e-17	3.68579594803016e-17
2008057	20	3.44775319781652e-17	4.05723932410015e-17
2008057	21	4.22566655369263e-17	4.96650256891455e-17
2008057	22	3.8962105374433e-17	4.53369374369378e-17
2008057	23	3.61597493858387e-17	4.15934526253161e-17
2008058	0	3.83252727476388e-17	4.36747926334385e-17
2008058	1	4.33547432556609e-17	5.03788637166966e-17
2008058	2	4.90993787802637e-17	5.81400581306633e-17
2008058	3	5.74625380809801e-17	6.8966584371111e-17
2008058	4	8.05854571144987e-17	1.02116575924309e-16
2008058	5	1.25003264757582e-16	1.69970932667333e-16
2008058	6	1.26012183419082e-16	1.70265177795798e-16
2008058	7	1.26054865910809e-16	1.70516891902766e-16
2008058	8	1.26216275528958e-16	1.70286330565756e-16
2008058	9	1.25988782089197e-16	1.69730901417788e-16
2008058	10	1.21901287027755e-16	1.59657107478205e-16
2008058	11	1.02186476122386e-16	1.25084812331613e-16
2008058	12	9.61727771407025e-17	1.17893276499923e-16
2008058	13	8.27370215109607e-17	1.03963607358257e-16
2008058	14	7.73828959849856e-17	1.01579203607905e-16
2008058	15	7.27140316637917e-17	9.86889820238896e-17
2008058	16	3.34755808053669e-17	4.54450566166604e-17
2008058	17	6.02772369876424e-17	8.18439877859649e-17
2008058	18	1.12843728168476e-16	1.52570511701724e-16
2008058	19	1.25857322253996e-16	1.70131920060072e-16
2008058	20	1.029650217307e-16	1.32767392247291e-16
2008058	21	8.66178401428388e-17	1.08310506849042e-16
2008058	22	8.23600725320126e-17	1.02126375141559e-16
2008058	23	8.08345365444384e-17	9.98322444943342e-17
2008059	0	7.92899086953784e-17	9.74518562464152e-17
2008059	1	7.72094878694853e-17	9.45549617694329e-17
2008059	2	7.28539926171035e-17	8.87532276050982e-17
2008059	3	6.6692908809353e-17	8.081327562324e-17
2008059	4	6.02223682609431e-17	7.22721801486602e-17
2008059	5	5.46047693600733e-17	6.54090652543903e-17
2008059	6	4.94470923615927e-17	5.87094507244523e-17
2008059	7	4.44862932152144e-17	5.18886300384845e-17
2008059	8	4.17305159338303e-17	4.83253541797258e-17
2008059	9	4.35978269214917e-17	5.1421600993695e-17
2008059	10	8.08556983889566e-17	1.0500000352272e-16
2008059	11	1.12091770873551e-16	1.50175627864343e-16
2008059	12	1.264343364495e-16	1.71514115500346e-16
2008059	13	1.2691756447319e-16	1.71391054330899e-16
2008059	14	5.27672878653709e-17	6.60163772583945e-17
2008059	15	3.04848164548096e-17	3.5845244621982e-17
2008059	16	2.38970387927474e-17	2.80374148579473e-17
2008059	17	2.04805207402362e-17	2.44473233671159e-17
2008059	18	1.80937637684711e-17	2.13356652241809e-17
2008059	19	1.57791384054481e-17	1.87277159120075e-17
2008059	20	1.4523130558817e-17	1.66785784716518e-17
2008059	21	1.29790161232121e-17	1.46748317408116e-17
2008059	22	1.30769505814172e-17	1.48713454598403e-17
2008059	23	1.58576258653038e-17	1.86570534008939e-17
2008060	0	1.95056559431453e-17	2.35313328065551e-17
2008060	1	2.1622375720559e-17	2.6930200272477e-17
2008060	2	7.80896061045056e-17	1.12885404895583e-16
2008060	3	6.55435084692754e-17	9.63043407759534e-17
2008060	4	4.25145458300904e-17	5.94679601696604e-17
2008060	5	3.27291499264756e-17	4.48771937816738e-17
2008060	6	4.89235478117902e-17	6.94221123663255e-17
2008060	7	8.18307803923826e-17	1.19865279971667e-16
2008060	8	7.47249240109439e-17	1.12782667089561e-16
2008060	9	3.9483726830207e-17	5.94673605157626e-17
2008060	10	4.62766935693392e-17	7.49925504894473e-17
2008060	11	2.47917342195063e-17	3.60197387256405e-17
2008060	12	1.83529923518581e-17	2.5746766279323e-17
2008060	13	1.85407003464583e-17	2.61746527867797e-17
2008060	14	2.11258440938784e-17	3.0005040602298e-17
2008060	15	2.52368780886672e-17	3.50566545612736e-17
2008060	16	2.80076192301338e-17	3.76672239008606e-17
2008060	17	2.75951326989833e-17	3.5984758007611e-17
2008060	18	2.44464358118985e-17	3.10985265362577e-17
2008060	19	1.87900999618646e-17	2.24246458526531e-17
2008060	20	1.00670509791212e-17	1.09676260042777e-17
2008060	21	5.91754746589681e-18	6.14535111007286e-18
2008060	22	2.57534356650611e-17	2.91719820100619e-17
2008060	23	1.21922414177997e-16	1.69540510311574e-16
