# Supplementary material for: A comparison of sea salt emission parameterizations in northwestern Europe using a chemistry transport model setup
Source: Copernicus journal article supplement (doi:10.5194/acp-16-9905-2016), 2016-08-08
Supplement: Supplementary file 2 [file acp-16-9905-2016-supplement.zip › conc/conc.timeseries.values.win2008.zero.Na.DE0002R.csv]

doy	hour	pm2.5	pm10
2008001	0	1.6877663110474e-17	1.87788280947063e-17
2008001	1	1.71412910538229e-17	1.93692201925018e-17
2008001	2	1.67506232095759e-17	1.93585134321041e-17
2008001	3	1.67333815818555e-17	1.94109072259024e-17
2008001	4	1.70265755121174e-17	1.97400243426207e-17
2008001	5	1.77065326318328e-17	2.05802864278089e-17
2008001	6	1.90817527414712e-17	2.21723453630511e-17
2008001	7	2.11257384833013e-17	2.46026339593579e-17
2008001	8	2.36408834942097e-17	2.79611246216865e-17
2008001	9	2.72911335375214e-17	3.23279078716816e-17
2008001	10	3.24538609092311e-17	3.69348918308383e-17
2008001	11	3.67822596045191e-17	4.19225839394661e-17
2008001	12	3.87861311316781e-17	4.48917339972147e-17
2008001	13	3.91435823368179e-17	4.55009478317802e-17
2008001	14	3.94848850400345e-17	4.58702996807534e-17
2008001	15	3.9342395020725e-17	4.59320281094395e-17
2008001	16	3.87429789688336e-17	4.55273613861649e-17
2008001	17	3.78110360263893e-17	4.48569542251272e-17
2008001	18	3.69635746311591e-17	4.43266040834508e-17
2008001	19	3.62713716667176e-17	4.37471219529511e-17
2008001	20	3.61196173420445e-17	4.30231392180646e-17
2008001	21	3.55071909197982e-17	4.22286219223153e-17
2008001	22	3.46616122040023e-17	4.14305503918402e-17
2008001	23	3.36051609726657e-17	4.06453723437709e-17
2008002	0	3.30156627932021e-17	3.99664315811087e-17
2008002	1	3.1993311607288e-17	3.93206500571571e-17
2008002	2	3.19604529270614e-17	3.87526607343502e-17
2008002	3	3.1851361730905e-17	3.82467451805072e-17
2008002	4	3.13111684792171e-17	3.77312787093087e-17
2008002	5	3.01786004850049e-17	3.71569768363038e-17
2008002	6	2.90457929321599e-17	3.696034462707e-17
2008002	7	2.9652552179175e-17	3.88211336619694e-17
2008002	8	3.02400732340142e-17	4.00635941388208e-17
2008002	9	3.12597459621974e-17	4.3016443214102e-17
2008002	10	3.45658857332356e-17	4.7096274056194e-17
2008002	11	3.83920089168279e-17	5.15740014349618e-17
2008002	12	4.25485406886738e-17	5.44296826027573e-17
2008002	13	4.38734617280991e-17	5.5597212047478e-17
2008002	14	4.33058788601354e-17	5.42150822819889e-17
2008002	15	4.26193787305835e-17	4.98842074399864e-17
2008002	16	3.9249143835393e-17	4.37205133962811e-17
2008002	17	3.2563089210488e-17	3.56978411572457e-17
2008002	18	2.55539457612796e-17	2.76948087447653e-17
2008002	19	2.00420182461923e-17	2.16911321937983e-17
2008002	20	1.51576728043678e-17	1.62233071973412e-17
2008002	21	1.14267707894234e-17	1.21770611372676e-17
2008002	22	9.10056528277882e-18	9.66690345138351e-18
2008002	23	7.4788951175805e-18	7.94679913805387e-18
2008003	0	6.53946213795481e-18	6.98624403687082e-18
2008003	1	6.09383516775918e-18	6.49323022360466e-18
2008003	2	5.71491887515542e-18	6.05802763419661e-18
2008003	3	5.41195146766989e-18	5.71612318928468e-18
2008003	4	5.35255260411431e-18	5.6669335907516e-18
2008003	5	5.51952660027956e-18	5.77820915785854e-18
2008003	6	5.82298055109535e-18	6.16173239872555e-18
2008003	7	6.05814237189177e-18	6.48322801901199e-18
2008003	8	5.97573718540528e-18	6.4522907037123e-18
2008003	9	6.03708513394371e-18	6.59134344241166e-18
2008003	10	6.45282391305954e-18	6.90891870688506e-18
2008003	11	6.98653649939926e-18	7.46807222502529e-18
2008003	12	7.61575414893416e-18	8.14798139571769e-18
2008003	13	8.02789273223985e-18	8.54137848078433e-18
2008003	14	8.10491436558178e-18	8.54446158739022e-18
2008003	15	8.19836861766673e-18	8.59881334536959e-18
2008003	16	8.80073489452019e-18	9.24440307574584e-18
2008003	17	1.00476493991996e-17	1.05790088061591e-17
2008003	18	1.10657950711306e-17	1.15452124298407e-17
2008003	19	1.14791662888069e-17	1.21397432852585e-17
2008003	20	1.1799602153356e-17	1.26207910487051e-17
2008003	21	1.20268002908115e-17	1.29164415218251e-17
2008003	22	1.20787160501353e-17	1.29848605476337e-17
2008003	23	1.2497768998322e-17	1.34470284705112e-17
2008004	0	1.28416127753915e-17	1.38281140742725e-17
2008004	1	1.31883391656189e-17	1.42589494427339e-17
2008004	2	1.35936518107588e-17	1.48243114790192e-17
2008004	3	1.41260730774213e-17	1.55565853873094e-17
2008004	4	1.46812308847248e-17	1.62529038601944e-17
2008004	5	1.50599995775039e-17	1.6753553764897e-17
2008004	6	1.52703630162588e-17	1.70697454281542e-17
2008004	7	1.53490796226023e-17	1.72363157954373e-17
2008004	8	1.53298369616179e-17	1.72501815470054e-17
2008004	9	1.54572549892155e-17	1.73923381254973e-17
2008004	10	1.58692265306603e-17	1.78308963995383e-17
2008004	11	1.616495803404e-17	1.80601388913775e-17
2008004	12	1.62326097492887e-17	1.79936370256467e-17
2008004	13	1.61124885243329e-17	1.77272696028751e-17
2008004	14	1.60119897493954e-17	1.75082253165815e-17
2008004	15	1.598015713448e-17	1.74017333704717e-17
2008004	16	1.58916915288929e-17	1.71594705210447e-17
2008004	17	1.53579253348092e-17	1.63194555386206e-17
2008004	18	1.48207013731808e-17	1.56084290839995e-17
2008004	19	1.47234869330388e-17	1.54549866311169e-17
2008004	20	1.5261618861392e-17	1.60213895003981e-17
2008004	21	1.54779508455869e-17	1.61941337573733e-17
2008004	22	1.58555326676607e-17	1.66430160577064e-17
2008004	23	1.77311587067891e-17	1.89445111956738e-17
2008005	0	2.00970581309846e-17	2.17761866708523e-17
2008005	1	2.20337710161072e-17	2.40717830085579e-17
2008005	2	2.39587817939981e-17	2.63812569932059e-17
2008005	3	2.55832810517672e-17	2.84338519054577e-17
2008005	4	2.76718359475704e-17	3.1263680916206e-17
2008005	5	3.03804347754457e-17	3.50141269783959e-17
2008005	6	3.34893129704289e-17	3.92613136779008e-17
2008005	7	3.62899333258156e-17	4.27070294143519e-17
2008005	8	3.82963976306284e-17	4.50675199539537e-17
2008005	9	4.09023856808678e-17	4.78441098861836e-17
2008005	10	4.44838586963152e-17	5.21615099543696e-17
2008005	11	4.69140169482471e-17	5.56621717695248e-17
2008005	12	4.82600814162688e-17	5.62617869692345e-17
2008005	13	4.74511690948008e-17	5.37506210588575e-17
2008005	14	4.5647193362428e-17	5.07594393205713e-17
2008005	15	4.30186851548149e-17	4.8438838170414e-17
2008005	16	4.2172058655335e-17	4.79973385987249e-17
2008005	17	4.23956765106731e-17	4.92659522928814e-17
2008005	18	4.409707486109e-17	5.26392972286568e-17
2008005	19	4.59575829292195e-17	5.7358876625724e-17
2008005	20	4.7513851512771e-17	6.16286693640175e-17
2008005	21	4.93761918777166e-17	6.42440459293016e-17
2008005	22	4.89370590652122e-17	6.66350287258319e-17
2008005	23	5.08613866539065e-17	6.98711340564919e-17
2008006	0	5.2370932773529e-17	7.2447163682145e-17
2008006	1	5.3252443592654e-17	7.43652787969363e-17
2008006	2	5.3496908391718e-17	7.52682145760492e-17
2008006	3	5.26902806669541e-17	7.47258147501254e-17
2008006	4	5.10273889474405e-17	7.29611190283668e-17
2008006	5	4.89516414914433e-17	7.03651588881957e-17
2008006	6	4.68918562172883e-17	6.7350712867447e-17
2008006	7	4.50024571064884e-17	6.42204712136692e-17
2008006	8	4.37739027737325e-17	6.18624058121505e-17
2008006	9	4.32912860603705e-17	6.05181029755547e-17
2008006	10	4.2485561172586e-17	5.98003145047639e-17
2008006	11	4.15181231753739e-17	6.3232046866582e-17
2008006	12	4.97338047159754e-17	7.92128721184595e-17
2008006	13	5.40696143995877e-17	8.89014024132623e-17
2008006	14	5.53501639307902e-17	9.06155591404785e-17
2008006	15	5.50799423155703e-17	8.94397031426496e-17
2008006	16	5.46797586810029e-17	8.83093020149035e-17
2008006	17	5.46352274837915e-17	8.69574650568175e-17
2008006	18	5.57495471137044e-17	8.60223026620179e-17
2008006	19	5.77377197011489e-17	8.62787494088421e-17
2008006	20	5.84050671738866e-17	8.7324475343857e-17
2008006	21	5.91228517889184e-17	8.8989066045857e-17
2008006	22	6.13863475760062e-17	9.14463006711039e-17
2008006	23	6.53352606354528e-17	9.4800893553163e-17
2008007	0	7.25656637290106e-17	1.02275063742629e-16
2008007	1	7.51816793326807e-17	1.03539005603427e-16
2008007	2	7.38775691638894e-17	1.01565152236093e-16
2008007	3	7.0871205940679e-17	9.84432694566634e-17
2008007	4	6.643202067322e-17	9.57452007070036e-17
2008007	5	6.3800500160259e-17	9.32476238021747e-17
2008007	6	6.2863350940945e-17	9.16448257649075e-17
2008007	7	6.09275135642744e-17	8.97038558920423e-17
2008007	8	5.98643549573224e-17	8.50829672611773e-17
2008007	9	5.86426538230138e-17	8.17128875351092e-17
2008007	10	5.5217196122075e-17	7.71337227932952e-17
2008007	11	4.98035702241525e-17	6.55079951891163e-17
2008007	12	6.61301624895619e-17	8.39551199089315e-17
2008007	13	8.01795458480744e-17	9.67625398749106e-17
2008007	14	1.09517791594608e-16	1.30994682713778e-16
2008007	15	9.47386644177146e-17	1.0622479547748e-16
2008007	16	6.05606225056229e-17	6.83492412553952e-17
2008007	17	4.21531526139157e-17	4.90993325248073e-17
2008007	18	3.98393198770079e-17	4.90009641302664e-17
2008007	19	4.07381881621063e-17	4.78398426843602e-17
2008007	20	4.44450848118282e-17	5.1694911623838e-17
2008007	21	6.10979232356862e-17	7.12624536850064e-17
2008007	22	7.99973352476735e-17	9.55380618209351e-17
2008007	23	8.50794134148491e-17	1.13192553297868e-16
2008008	0	9.85614484564837e-17	1.28795939882075e-16
2008008	1	1.1796024874953e-16	1.72263327118563e-16
2008008	2	1.09818853038824e-16	1.48160921496403e-16
2008008	3	7.88534946643369e-17	9.5159191432039e-17
2008008	4	7.66790284746413e-17	9.23384286538724e-17
2008008	5	7.53915595694461e-17	9.08094298025327e-17
2008008	6	8.48525063066429e-17	1.0132227595837e-16
2008008	7	9.47692362767638e-17	1.1140985901045e-16
2008008	8	9.78667837993304e-17	1.09319085508965e-16
2008008	9	9.55711251482442e-17	1.04762377973034e-16
2008008	10	9.36797397030663e-17	1.02160417537151e-16
2008008	11	9.20473809076336e-17	1.0149115467292e-16
2008008	12	8.88030040303853e-17	1.00154227629953e-16
2008008	13	8.57668084262712e-17	9.7013304573027e-17
2008008	14	8.21603527221988e-17	9.33892958956735e-17
2008008	15	7.76467916328874e-17	9.05696182440414e-17
2008008	16	7.5349143936929e-17	8.85494047642844e-17
2008008	17	7.19186156426799e-17	8.46792429934278e-17
2008008	18	6.97088381062478e-17	8.27164883650228e-17
2008008	19	6.9078361685578e-17	8.09953161169126e-17
2008008	20	6.8523911324381e-17	7.93977453842823e-17
2008008	21	7.00713268469979e-17	8.0606943240832e-17
2008008	22	7.27042038475105e-17	8.62587443727777e-17
2008008	23	7.72000193530732e-17	9.38053840754516e-17
2008009	0	8.37830168455516e-17	1.03371216137768e-16
2008009	1	8.5759468946472e-17	1.10439023901351e-16
2008009	2	8.47293605209761e-17	1.1152916368485e-16
2008009	3	8.42997403303932e-17	1.08961524106731e-16
2008009	4	8.58654624083337e-17	1.09971429273602e-16
2008009	5	8.81639456001106e-17	1.12687483760799e-16
2008009	6	8.81389224056324e-17	1.12011587446361e-16
2008009	7	8.85276989035182e-17	1.08556908699439e-16
2008009	8	8.7747703057628e-17	1.03413539147115e-16
2008009	9	8.32144143812009e-17	9.74973433801434e-17
2008009	10	7.70208279557882e-17	8.97051424958991e-17
2008009	11	6.5781532451333e-17	7.65132309184276e-17
2008009	12	5.43372642990954e-17	6.25571856255118e-17
2008009	13	4.53450734203979e-17	5.31425307072609e-17
2008009	14	4.08383838149668e-17	4.93041321718139e-17
2008009	15	4.0605471020766e-17	5.07081163877863e-17
2008009	16	4.16977049587165e-17	5.33576392117592e-17
2008009	17	4.35636886282126e-17	5.70368854028733e-17
2008009	18	5.01767375748661e-17	6.70391972226235e-17
2008009	19	5.35564286870361e-17	7.08730746323566e-17
2008009	20	5.69276786461469e-17	7.31701641888472e-17
2008009	21	6.15357926027638e-17	7.58847041086499e-17
2008009	22	6.37070097927098e-17	7.8520491970349e-17
2008009	23	6.48256477045892e-17	8.21115681642745e-17
2008010	0	6.3083558947465e-17	8.52477952881282e-17
2008010	1	5.85960596576017e-17	8.33341592811662e-17
2008010	2	5.92373005096371e-17	8.14539247262926e-17
2008010	3	6.42653107349137e-17	8.27150965936489e-17
2008010	4	6.78259524653638e-17	8.48788670058583e-17
2008010	5	6.98341107858871e-17	8.71323716193251e-17
2008010	6	7.07454696916771e-17	8.79200549490685e-17
2008010	7	6.99087067442961e-17	8.64022215793455e-17
2008010	8	6.45318871620485e-17	8.00165913564614e-17
2008010	9	5.63585756067995e-17	7.11182119733435e-17
2008010	10	4.8373810995182e-17	6.53515794562628e-17
2008010	11	4.22513326652823e-17	5.53395065240708e-17
2008010	12	3.8198029705205e-17	4.98047103952119e-17
2008010	13	3.89610050378826e-17	5.02482812743388e-17
2008010	14	3.80129382036515e-17	4.79308836013375e-17
2008010	15	3.70023590609423e-17	4.66320174226164e-17
2008010	16	3.69454693982214e-17	4.65037747051638e-17
2008010	17	3.64218011664228e-17	4.58133795039533e-17
2008010	18	3.54036070137025e-17	4.37689233682053e-17
2008010	19	3.52831972031524e-17	4.24592339708639e-17
2008010	20	3.63486581624676e-17	4.42958963400738e-17
2008010	21	3.868995615379e-17	4.75397984099381e-17
2008010	22	4.36482577542805e-17	5.41595200735957e-17
2008010	23	6.29702495597896e-17	8.14743852612995e-17
2008011	0	8.52757466085917e-17	1.13124000742484e-16
2008011	1	7.88828692535842e-17	1.01436322701489e-16
2008011	2	7.58905558136824e-17	9.83495669272941e-17
2008011	3	7.53262035149481e-17	9.65002587992839e-17
2008011	4	7.27009903313999e-17	8.91655786772338e-17
2008011	5	6.86268489538685e-17	8.27121259644829e-17
2008011	6	6.14794608368527e-17	7.292762657685e-17
2008011	7	5.55114748835171e-17	6.7241354953507e-17
2008011	8	5.69947474202279e-17	7.23242093921192e-17
2008011	9	6.46801301942591e-17	8.11578936086074e-17
2008011	10	7.75421139933823e-17	9.71566274256681e-17
2008011	11	7.75058644115343e-17	9.35474087288003e-17
2008011	12	7.54369207237777e-17	8.9190859086385e-17
2008011	13	7.45659915759976e-17	8.80468710337351e-17
2008011	14	7.44175941997323e-17	8.80924459057083e-17
2008011	15	7.28491841528598e-17	8.6266919032211e-17
2008011	16	6.76701423298242e-17	7.84213283167691e-17
2008011	17	5.94932505010367e-17	6.78701180668535e-17
2008011	18	5.05242991557687e-17	5.79647763737208e-17
2008011	19	4.66686942363529e-17	5.41275630549105e-17
2008011	20	4.77293795632519e-17	5.70118711717646e-17
2008011	21	5.43049319187561e-17	6.47507611190318e-17
2008011	22	6.12701770918141e-17	7.31220789466841e-17
2008011	23	6.44011390574912e-17	7.81166519975983e-17
2008012	0	6.86212854638128e-17	8.44331513365822e-17
2008012	1	7.23861728471824e-17	8.97743004717109e-17
2008012	2	7.31590922533516e-17	9.11659856907428e-17
2008012	3	6.35576271319661e-17	8.38357514880795e-17
2008012	4	5.6666373036924e-17	7.25787148131557e-17
2008012	5	5.83594043993923e-17	7.12880764614398e-17
2008012	6	6.43175024118493e-17	7.70848909908044e-17
2008012	7	6.61676051968459e-17	8.18089936879415e-17
2008012	8	6.76686627180455e-17	8.27458060924094e-17
2008012	9	7.41456557596762e-17	8.72087580920746e-17
2008012	10	8.72590992290365e-17	1.01436669189816e-16
2008012	11	9.29933065724328e-17	1.08943158878486e-16
2008012	12	8.97967868694868e-17	1.04760524672129e-16
2008012	13	8.5263334252956e-17	9.86104482078386e-17
2008012	14	8.12746826075512e-17	9.31815550544791e-17
2008012	15	7.53807084272378e-17	8.75261271649664e-17
2008012	16	7.07396744013307e-17	8.4680841067389e-17
2008012	17	6.58144720702831e-17	8.16068958968236e-17
2008012	18	6.17269596076023e-17	7.92212703296194e-17
2008012	19	6.06307056887563e-17	7.81949092020465e-17
2008012	20	6.04321999598417e-17	7.96067167376431e-17
2008012	21	6.02629448696384e-17	8.08424861150663e-17
2008012	22	6.08898224138676e-17	8.14892411487071e-17
2008012	23	6.30482331522814e-17	8.11655050938701e-17
2008013	0	6.49260934200198e-17	8.1382650217278e-17
2008013	1	6.69252149496171e-17	8.19671096085095e-17
2008013	2	6.73065936774582e-17	8.30753513611083e-17
2008013	3	6.75374643064034e-17	8.42791908974179e-17
2008013	4	6.9197024302658e-17	8.63017013601131e-17
2008013	5	7.23376591409778e-17	8.87340450804574e-17
2008013	6	7.4287445900146e-17	9.0548401391241e-17
2008013	7	7.52391867103167e-17	9.13446853157877e-17
2008013	8	7.66015981280565e-17	9.18192847559492e-17
2008013	9	7.83061246727453e-17	9.37464631147383e-17
2008013	10	8.09539240617226e-17	9.96511221609339e-17
2008013	11	8.35519305603673e-17	1.06480220339692e-16
2008013	12	8.42699945844064e-17	1.07244237975077e-16
2008013	13	8.30180251682455e-17	1.05130468565409e-16
2008013	14	7.94686125525092e-17	1.02574760293665e-16
2008013	15	7.68179694683667e-17	1.00870659463726e-16
2008013	16	7.63883256761127e-17	1.00931114416633e-16
2008013	17	7.68985327662268e-17	1.0139218100789e-16
2008013	18	7.53159944037218e-17	1.00810471427162e-16
2008013	19	7.36861094546751e-17	9.92591209690637e-17
2008013	20	7.19117876877003e-17	9.74983384684969e-17
2008013	21	7.30662151235535e-17	9.62964117915369e-17
2008013	22	7.37820687124292e-17	9.56257110686393e-17
2008013	23	7.24824513557993e-17	9.4664701463143e-17
2008014	0	7.1791541233338e-17	9.32130887882601e-17
2008014	1	6.85767002177641e-17	9.12685268270936e-17
2008014	2	6.5906242108144e-17	8.89369180041539e-17
2008014	3	6.39431806765342e-17	8.64320361678312e-17
2008014	4	6.22692487914302e-17	8.33252001922103e-17
2008014	5	6.18299631948474e-17	8.12142765004741e-17
2008014	6	5.94569814649054e-17	8.07136578672077e-17
2008014	7	5.84644715268778e-17	7.6363738652717e-17
2008014	8	5.72231299309775e-17	7.3286546239751e-17
2008014	9	5.92404875221362e-17	7.33054439378253e-17
2008014	10	6.55300055270467e-17	7.9424386131208e-17
2008014	11	6.64681469408087e-17	7.77046231874132e-17
2008014	12	6.47930856816439e-17	7.31526038563283e-17
2008014	13	6.0929667569899e-17	6.68415094306149e-17
2008014	14	5.54263292055639e-17	6.02436979686769e-17
2008014	15	5.01713249645483e-17	5.50003705536104e-17
2008014	16	4.70813669327865e-17	5.196678124535e-17
2008014	17	4.53426163070446e-17	5.0344565111396e-17
2008014	18	4.44319003003997e-17	4.96298644539864e-17
2008014	19	4.38647770218557e-17	4.94421047731108e-17
2008014	20	4.39605631493137e-17	4.98949275336543e-17
2008014	21	4.46606249417856e-17	5.10579309158767e-17
2008014	22	4.57309472191432e-17	5.21742305912935e-17
2008014	23	4.6188848033261e-17	5.27896865702765e-17
2008015	0	4.61636092853841e-17	5.28207908718111e-17
2008015	1	4.59484641593839e-17	5.26451539258285e-17
2008015	2	4.59666049981713e-17	5.26672971348239e-17
2008015	3	4.65378107236937e-17	5.34560439065676e-17
2008015	4	4.75491442331644e-17	5.51446909976726e-17
2008015	5	4.81019078978703e-17	5.69826239247001e-17
2008015	6	4.9082425503959e-17	5.8508540731242e-17
2008015	7	5.07391745197309e-17	6.08625199813602e-17
2008015	8	5.44182050019914e-17	6.40952711506806e-17
2008015	9	5.90884970314201e-17	6.89714670614925e-17
2008015	10	6.05304652485696e-17	7.06592165829109e-17
2008015	11	6.06733512694814e-17	6.9562501078403e-17
2008015	12	6.01827372994351e-17	6.82047709078584e-17
2008015	13	6.10949854086659e-17	6.86594441755536e-17
2008015	14	6.02153393323025e-17	6.7390752496109e-17
2008015	15	5.79019893499994e-17	6.35621281216913e-17
2008015	16	5.4635027115401e-17	5.93089249758608e-17
2008015	17	5.27294438605396e-17	5.6811457855176e-17
2008015	18	5.31230394318838e-17	5.67293019592989e-17
2008015	19	5.55280509790494e-17	5.91643564872885e-17
2008015	20	5.86337855246311e-17	6.22083786925089e-17
2008015	21	6.07424353402758e-17	6.3871156256871e-17
2008015	22	6.17445175707032e-17	6.45357951215308e-17
2008015	23	6.07206300970988e-17	6.31967161211371e-17
2008016	0	5.34579841211893e-17	5.54535071410132e-17
2008016	1	4.37398784578003e-17	4.55120912463456e-17
2008016	2	3.96364396367742e-17	4.16686300185958e-17
2008016	3	3.95717210637782e-17	4.23033054043195e-17
2008016	4	4.08412795556986e-17	4.42395152241224e-17
2008016	5	4.30870914009193e-17	4.73482676376213e-17
2008016	6	4.62984832210203e-17	5.20340808869569e-17
2008016	7	4.83595168070756e-17	5.56803133032764e-17
2008016	8	5.38230658924927e-17	6.38378497346762e-17
2008016	9	7.08906224409175e-17	8.72979347294641e-17
2008016	10	8.88766737692944e-17	1.11667820564129e-16
2008016	11	9.52080358731535e-17	1.22776194100365e-16
2008016	12	1.21606754720641e-16	1.67369174412501e-16
2008016	13	8.3272727352523e-17	1.07834960706489e-16
2008016	14	8.51013182899728e-17	1.01865030522238e-16
2008016	15	8.38440010778979e-17	9.66430533948216e-17
2008016	16	8.08613309404487e-17	9.24182654470903e-17
2008016	17	7.88506541459052e-17	8.88706572807838e-17
2008016	18	7.51551335566385e-17	8.57452733665689e-17
2008016	19	7.1336819148995e-17	8.28267927123071e-17
2008016	20	7.09460561252765e-17	8.2010076467727e-17
2008016	21	6.9046410552331e-17	8.03866688488659e-17
2008016	22	6.66246926817369e-17	7.89707702137839e-17
2008016	23	6.49926247491959e-17	7.9332810293476e-17
2008017	0	6.30047626984543e-17	7.76989318483324e-17
2008017	1	6.04091780991372e-17	7.52186570710558e-17
2008017	2	5.68798319788323e-17	7.28252797714214e-17
2008017	3	5.32202173914819e-17	7.10155983436836e-17
2008017	4	5.21523571483061e-17	7.0728735847136e-17
2008017	5	5.35777249379667e-17	7.32495977533218e-17
2008017	6	5.72112023443158e-17	7.78847804355106e-17
2008017	7	6.07629831663045e-17	8.22365486286195e-17
2008017	8	6.32353459899308e-17	8.45017285819005e-17
2008017	9	6.64164280967524e-17	8.74389235754008e-17
2008017	10	6.78259777219822e-17	8.8168998320594e-17
2008017	11	6.74711159583572e-17	8.52975230963643e-17
2008017	12	6.6558300589418e-17	8.27788920762831e-17
2008017	13	6.62872538771671e-17	7.82675638237351e-17
2008017	14	6.75288606367784e-17	7.59358181319358e-17
2008017	15	6.39726179435523e-17	7.1710104452798e-17
2008017	16	6.16603503210051e-17	6.92410007267104e-17
2008017	17	6.44842246621034e-17	7.1788554655051e-17
2008017	18	6.71234162559991e-17	7.39103177910783e-17
2008017	19	6.4507161969002e-17	7.29936096810021e-17
2008017	20	6.01929228018833e-17	6.78041709298644e-17
2008017	21	4.48155400778829e-17	4.85391571910416e-17
2008017	22	3.69031250789108e-17	3.8800814968302e-17
2008017	23	3.25581897278159e-17	3.4604809416378e-17
2008018	0	3.31915440794634e-17	3.7428589449107e-17
2008018	1	3.6335006511921e-17	4.28978028458442e-17
2008018	2	3.17210763313947e-17	4.1808267253822e-17
2008018	3	3.14085315742121e-17	4.29807586876434e-17
2008018	4	5.73353881532733e-17	7.57170041944271e-17
2008018	5	7.03438298453319e-17	9.21180244407981e-17
2008018	6	6.10767302291589e-17	7.47383037094453e-17
2008018	7	6.26860596462219e-17	8.15974009632215e-17
2008018	8	1.1173655190087e-16	1.67907278544917e-16
2008018	9	1.11895946079246e-16	1.67691480379592e-16
2008018	10	1.12366251551312e-16	1.67627867155514e-16
2008018	11	7.50698188518154e-17	9.87992659135307e-17
2008018	12	6.76616615574983e-17	8.39436917856129e-17
2008018	13	6.72476387904014e-17	8.12917375358798e-17
2008018	14	6.91877381224872e-17	8.24830821915205e-17
2008018	15	7.09934882706974e-17	8.48258800669141e-17
2008018	16	6.80737713461616e-17	8.24397980535501e-17
2008018	17	6.60731455983301e-17	7.99338099631977e-17
2008018	18	6.70727850658904e-17	7.79129339940072e-17
2008018	19	6.66006714468385e-17	7.70752110066341e-17
2008018	20	6.20864203566787e-17	7.13989824144715e-17
2008018	21	5.38124207614854e-17	5.88096456721771e-17
2008018	22	3.47354118653462e-17	3.6669060656117e-17
2008018	23	3.60374696215477e-17	3.8946897192368e-17
2008019	0	4.43960230735763e-17	4.96051005007562e-17
2008019	1	5.15458035126508e-17	5.884290333304e-17
2008019	2	5.704645831768e-17	6.67319493788319e-17
2008019	3	3.71807563425849e-17	4.32209028366834e-17
2008019	4	5.40555729943852e-17	6.28678010145093e-17
2008019	5	6.6291421116715e-17	7.49850674172713e-17
2008019	6	4.90840846934845e-17	5.44509793732731e-17
2008019	7	3.04108408791803e-17	3.31880567383113e-17
2008019	8	2.04349410161789e-17	2.21774818250776e-17
2008019	9	1.92769501685731e-17	2.13249370267813e-17
2008019	10	2.59711278793736e-17	2.92816807790818e-17
2008019	11	3.74984541409534e-17	4.19658727634944e-17
2008019	12	4.54375304234611e-17	5.13221254489981e-17
2008019	13	4.95439325665187e-17	5.66284977954811e-17
2008019	14	5.01908917397644e-17	5.62587137400167e-17
2008019	15	4.93710168341363e-17	5.45608553565567e-17
2008019	16	4.76576131223633e-17	5.31314463640594e-17
2008019	17	4.66525433023664e-17	5.21616462938511e-17
2008019	18	4.67670776704685e-17	5.21062722209874e-17
2008019	19	4.7347721399806e-17	5.3134167206032e-17
2008019	20	4.82098644407729e-17	5.46927349359248e-17
2008019	21	4.88512769574355e-17	5.51644803053929e-17
2008019	22	4.8802654893177e-17	5.41778033879345e-17
2008019	23	4.74655670625075e-17	5.24718097704763e-17
2008020	0	4.57992818569541e-17	5.13212498285279e-17
2008020	1	4.43933782357789e-17	5.01536440753178e-17
2008020	2	4.33709546314628e-17	4.92367543718201e-17
2008020	3	4.29137800279563e-17	4.91868232208558e-17
2008020	4	4.25027973787856e-17	4.95447676543949e-17
2008020	5	4.13335695754876e-17	4.96205518895817e-17
2008020	6	3.85730501134465e-17	4.96038858389809e-17
2008020	7	2.97782872700689e-17	3.8649763319246e-17
2008020	8	2.29064927828527e-17	2.76484785220783e-17
2008020	9	1.94100517854322e-17	2.26494123458444e-17
2008020	10	1.78516099372756e-17	1.98448183744037e-17
2008020	11	1.74014659004063e-17	1.94111234447833e-17
2008020	12	1.74778099711309e-17	2.02156644626009e-17
2008020	13	1.79532242722078e-17	2.17279443142586e-17
2008020	14	1.86578449628825e-17	2.35542021510208e-17
2008020	15	2.41776602934894e-17	3.20871200381484e-17
2008020	16	3.47097282744008e-17	4.76449441048192e-17
2008020	17	3.75060374597167e-17	5.25388341296502e-17
2008020	18	3.00340072506777e-17	4.33837761946293e-17
2008020	19	2.25988732167517e-17	3.38496314786173e-17
2008020	20	1.804100874491e-17	2.75666162270576e-17
2008020	21	1.55483389361969e-17	2.47663125800926e-17
2008020	22	1.4040412815919e-17	2.41121340377801e-17
2008020	23	1.32585754256993e-17	2.33880717194361e-17
2008021	0	1.60766736018019e-17	2.23428549431847e-17
2008021	1	1.1837429859299e-17	1.21599756365152e-17
2008021	2	1.17453768542418e-17	1.17943515776439e-17
2008021	3	1.27127768105051e-17	1.27790491465173e-17
2008021	4	1.52146042465892e-17	1.53703446550528e-17
2008021	5	1.83979821106256e-17	1.85267382253094e-17
2008021	6	1.74888330659108e-17	2.04893129527627e-17
2008021	7	1.50947113412238e-17	2.21879773794814e-17
2008021	8	1.56216284964428e-17	2.42543085493516e-17
2008021	9	2.09318178352402e-17	2.37998514655601e-17
2008021	10	1.86992949456838e-17	1.95571258760212e-17
2008021	11	1.75517484948035e-17	1.7799561992849e-17
2008021	12	1.63463098700357e-17	1.64798238951247e-17
2008021	13	1.5243452730426e-17	1.53209483761276e-17
2008021	14	1.44367391579362e-17	1.45420734721739e-17
2008021	15	1.59908476101298e-17	1.63050207215603e-17
2008021	16	1.36899353113956e-17	1.5403511672344e-17
2008021	17	1.52845080478733e-17	1.65016074408726e-17
2008021	18	2.45003772785752e-17	2.74332822800638e-17
2008021	19	2.31489172825259e-17	2.63772064104295e-17
2008021	20	1.67960714974799e-17	1.90361617924311e-17
2008021	21	1.14406301721149e-17	1.29097833680546e-17
2008021	22	1.31109007488635e-17	1.44547362140428e-17
2008021	23	1.60828487587972e-17	1.83704717597587e-17
2008022	0	1.75621804102939e-17	2.03170616294478e-17
2008022	1	1.43850336240347e-17	1.72432360758555e-17
2008022	2	1.69887641451385e-17	2.07735866338661e-17
2008022	3	2.65876483255985e-17	3.55614391739706e-17
2008022	4	3.9966138932752e-17	5.43023833763315e-17
2008022	5	5.14231294714888e-17	6.70648965625415e-17
2008022	6	6.0076669836123e-17	7.70399179490316e-17
2008022	7	6.61171272395433e-17	8.28656241478479e-17
2008022	8	7.28879181886204e-17	8.88184115076481e-17
2008022	9	8.27702374036613e-17	9.92369051819221e-17
2008022	10	9.08745490942475e-17	1.07598963718443e-16
2008022	11	9.53876126385191e-17	1.11867711531109e-16
2008022	12	9.61662408787065e-17	1.14459187014957e-16
2008022	13	1.02424196782322e-16	1.27819722012796e-16
2008022	14	1.30672869278908e-16	1.85376099501829e-16
2008022	15	8.35352768028258e-17	1.1628472143841e-16
2008022	16	8.72789097239251e-17	1.22482681474135e-16
2008022	17	9.09256134734457e-17	1.26379193038853e-16
2008022	18	8.99800456648872e-17	1.25763678898232e-16
2008022	19	8.93795951298952e-17	1.25692663519546e-16
2008022	20	8.97031657485681e-17	1.27051535536782e-16
2008022	21	9.08820911992891e-17	1.29111479801128e-16
2008022	22	9.16506364075675e-17	1.30706121824354e-16
2008022	23	9.05534725281109e-17	1.30907658174273e-16
2008023	0	8.75899527137684e-17	1.28277899318668e-16
2008023	1	8.58052387635656e-17	1.22211630887553e-16
2008023	2	8.16914821139566e-17	1.1485930760071e-16
2008023	3	7.65561555374195e-17	1.07215798182991e-16
2008023	4	7.02324514047916e-17	9.88172824021025e-17
2008023	5	6.38420109635194e-17	9.19606692048241e-17
2008023	6	5.91493397410485e-17	8.52816402078104e-17
2008023	7	5.43676768842967e-17	7.77315059766129e-17
2008023	8	5.08484211505692e-17	7.0636570102934e-17
2008023	9	5.42681182537644e-17	6.53400063580026e-17
2008023	10	5.21325417468019e-17	6.12142481532955e-17
2008023	11	4.8155497671895e-17	5.79727528542581e-17
2008023	12	4.39780105093172e-17	5.34849997855842e-17
2008023	13	3.90247459843415e-17	4.67905879858298e-17
2008023	14	3.47433605595749e-17	4.0986050917153e-17
2008023	15	3.20092440077254e-17	3.70653664803407e-17
2008023	16	2.94339344003565e-17	3.41242011768631e-17
2008023	17	2.64136235437243e-17	3.0522517756472e-17
2008023	18	2.18253331187343e-17	2.49956718796442e-17
2008023	19	1.94841560827042e-17	2.25812202447167e-17
2008023	20	2.4208264156483e-17	2.89593320194668e-17
2008023	21	3.09504830788756e-17	3.76659815288559e-17
2008023	22	3.51648513644361e-17	4.27977490822726e-17
2008023	23	3.85244030282866e-17	4.66359786815439e-17
2008024	0	4.09809231304793e-17	4.93342914278421e-17
2008024	1	4.20811720564799e-17	5.08038229516464e-17
2008024	2	4.21216294174961e-17	5.15532541583283e-17
2008024	3	4.21539560792111e-17	5.3033781106349e-17
2008024	4	4.22090150915778e-17	5.35121226707976e-17
2008024	5	4.16980387463518e-17	5.16028724104901e-17
2008024	6	3.99592949344083e-17	4.89100414571157e-17
2008024	7	3.84875695454767e-17	4.62213967881229e-17
2008024	8	3.94112363747895e-17	4.74150338454159e-17
2008024	9	4.20100482454499e-17	5.14274290331171e-17
2008024	10	4.64760612635976e-17	5.72594669812219e-17
2008024	11	4.73582924181898e-17	5.87526183099935e-17
2008024	12	3.93955307425404e-17	4.83259875652836e-17
2008024	13	3.33307813045248e-17	3.79691658113626e-17
2008024	14	4.56661663118679e-17	5.12699551130722e-17
2008024	15	6.74263256080909e-17	7.56931737513784e-17
2008024	16	8.42341787590022e-17	9.37421082335355e-17
2008024	17	9.54381368323507e-17	1.09390741144198e-16
2008024	18	1.22945414573562e-16	1.67556655495104e-16
2008024	19	1.22498855041582e-16	1.6812651677542e-16
2008024	20	1.22592919677611e-16	1.68158779274818e-16
2008024	21	1.21767411619775e-16	1.67969244018952e-16
2008024	22	1.19996693690785e-16	1.67898314694582e-16
2008024	23	1.03868772870834e-16	1.37604907922523e-16
2008025	0	9.85955326565085e-17	1.24789532515256e-16
2008025	1	9.83145866237376e-17	1.21128593427964e-16
2008025	2	9.50669789710771e-17	1.16256543194197e-16
2008025	3	9.42037666336264e-17	1.13135567723532e-16
2008025	4	9.00192869581959e-17	1.10940376399941e-16
2008025	5	8.76679973972662e-17	1.1016345516682e-16
2008025	6	8.60826394673521e-17	1.093642820517e-16
2008025	7	8.76170115816134e-17	1.07329674707424e-16
2008025	8	8.46553128803543e-17	1.01821033067786e-16
2008025	9	8.18672854544134e-17	9.35230845482278e-17
2008025	10	7.47381014383314e-17	8.29718401655015e-17
2008025	11	6.44710177778503e-17	7.00661961156464e-17
2008025	12	5.16583910967494e-17	5.49972217507473e-17
2008025	13	4.1067211743155e-17	4.28958621610166e-17
2008025	14	3.2664956122133e-17	3.37807888727863e-17
2008025	15	2.53079127861846e-17	2.60801289825149e-17
2008025	16	1.92859011824053e-17	1.99449576636536e-17
2008025	17	1.52403516066099e-17	1.58805537893038e-17
2008025	18	1.30152456603791e-17	1.3871147295231e-17
2008025	19	1.09380857039816e-17	1.19059882200519e-17
2008025	20	8.46883744234664e-18	9.24479517536014e-18
2008025	21	6.4800892580926e-18	7.12427759596995e-18
2008025	22	5.11299450808369e-18	5.65681011776963e-18
2008025	23	4.12972616784031e-18	4.62260366470948e-18
2008026	0	3.52237945729828e-18	3.93023740858665e-18
2008026	1	3.22875685164987e-18	3.59383286774683e-18
2008026	2	3.04825266655905e-18	3.38717382704442e-18
2008026	3	2.73851098626748e-18	3.04347283288729e-18
2008026	4	2.49266544427768e-18	2.76695398057956e-18
2008026	5	2.53948975728134e-18	2.82226576537047e-18
2008026	6	2.61554732951573e-18	2.93011204099897e-18
2008026	7	2.55654335524811e-18	2.86862155134274e-18
2008026	8	2.54445947859178e-18	2.84950247005638e-18
2008026	9	2.6647651387564e-18	2.98447010826241e-18
2008026	10	3.12118181189853e-18	3.49879811860358e-18
2008026	11	4.17743195068948e-18	4.79573152394793e-18
2008026	12	8.45364360221656e-18	9.95244430837891e-18
2008026	13	2.01395525000802e-17	2.37000766647422e-17
2008026	14	5.46321582011794e-17	6.70275448760452e-17
2008026	15	6.95227441391525e-17	8.44930317998679e-17
2008026	16	7.21232594956171e-17	8.77714833310574e-17
2008026	17	1.24318581772154e-16	1.69268596645357e-16
2008026	18	7.45310327810494e-17	9.16007026864899e-17
2008026	19	7.98255305093961e-17	9.42162917518043e-17
2008026	20	6.79529924452879e-17	7.84726315459681e-17
2008026	21	5.69335580987603e-17	6.51029102369499e-17
2008026	22	5.48056946792177e-17	6.22161383197384e-17
2008026	23	5.26936553238728e-17	5.93295413446781e-17
2008027	0	4.87103473502373e-17	5.4470079058572e-17
2008027	1	4.3129966951768e-17	4.86403710612868e-17
2008027	2	3.74376854721913e-17	4.25110571995919e-17
2008027	3	3.11341607852879e-17	3.50260919811864e-17
2008027	4	2.02510573294539e-17	2.19754880280062e-17
2008027	5	1.44272899446658e-17	1.53094827900366e-17
2008027	6	1.17194915826816e-17	1.21963610847463e-17
2008027	7	1.11250044200725e-17	1.15350150092906e-17
2008027	8	1.093978005066e-17	1.13216087753665e-17
2008027	9	1.06374021486276e-17	1.09661846666522e-17
2008027	10	9.84840149407876e-18	1.01200382490454e-17
2008027	11	7.75847555753402e-18	7.99812217635676e-18
2008027	12	5.68779994124993e-18	5.90487662584058e-18
2008027	13	4.63476246629681e-18	4.95272398799382e-18
2008027	14	4.3442086953187e-18	4.66899630723607e-18
2008027	15	4.17891179924412e-18	4.53242468070067e-18
2008027	16	4.44278842958327e-18	4.94726928640905e-18
2008027	17	4.78791376201301e-18	5.48044847794329e-18
2008027	18	5.09145714619149e-18	5.91216059717902e-18
2008027	19	5.31262111292949e-18	6.18974352028082e-18
2008027	20	5.42262631281739e-18	6.28624150087503e-18
2008027	21	5.36072446334352e-18	6.20490734551325e-18
2008027	22	5.17565757238298e-18	5.99278108892615e-18
2008027	23	4.9306575367211e-18	5.670655167321e-18
2008028	0	4.60165238296142e-18	5.20790499661214e-18
2008028	1	4.12794786208295e-18	4.62363105475134e-18
2008028	2	3.54595501097568e-18	4.01964669266762e-18
2008028	3	3.00553978611544e-18	3.41509265873356e-18
2008028	4	2.36378881137878e-18	2.66455463968013e-18
2008028	5	1.64681293170525e-18	1.8615106563811e-18
2008028	6	1.23156123738202e-18	1.39528333556305e-18
2008028	7	1.02189503721528e-18	1.14990917562223e-18
2008028	8	9.16697502081426e-19	1.03048201094649e-18
2008028	9	8.7830706193708e-19	1.0439263345163e-18
2008028	10	1.05397998873096e-18	1.26810566760687e-18
2008028	11	1.49485341149741e-18	1.72501031463681e-18
2008028	12	2.15595195774273e-18	2.52236541221226e-18
2008028	13	3.06099247985301e-18	3.62768493845826e-18
2008028	14	4.18315394299761e-18	4.9729754841035e-18
2008028	15	5.60918947604791e-18	6.73781766631742e-18
2008028	16	6.98136405882999e-18	8.49563624472385e-18
2008028	17	8.50537699676422e-18	1.05142927940685e-17
2008028	18	9.99963009568908e-18	1.26769025665798e-17
2008028	19	1.06721349368408e-17	1.40946715663782e-17
2008028	20	1.07481944294092e-17	1.48456163971224e-17
2008028	21	1.12902899464594e-17	1.5158051596523e-17
2008028	22	1.12922029540256e-17	1.47281291717653e-17
2008028	23	1.20735147543965e-17	1.56158243883325e-17
2008029	0	1.46128521205925e-17	1.87057880924199e-17
2008029	1	1.53219890906795e-17	2.00795399497244e-17
2008029	2	1.56132004698291e-17	2.09935489898691e-17
2008029	3	1.56242417159863e-17	2.1658517120031e-17
2008029	4	1.59244073288934e-17	2.23803792077398e-17
2008029	5	1.64247214443145e-17	2.3393433192553e-17
2008029	6	1.61280283554266e-17	2.31772120198684e-17
2008029	7	1.61891198911365e-17	2.29754620408392e-17
2008029	8	1.71790450510576e-17	2.29662749822145e-17
2008029	9	1.77827785905152e-17	2.29501269886035e-17
2008029	10	1.86726310116752e-17	2.32454973120527e-17
2008029	11	1.88422115572853e-17	2.28383700940883e-17
2008029	12	1.85158418892417e-17	2.21889061108806e-17
2008029	13	1.81184637943888e-17	2.19004085329616e-17
2008029	14	1.78158237488899e-17	2.21167613966625e-17
2008029	15	1.70524877411779e-17	2.17095558438043e-17
2008029	16	1.63497127575283e-17	2.11797993469438e-17
2008029	17	1.58113299805292e-17	2.05207361577889e-17
2008029	18	1.52453782998218e-17	1.98258846525673e-17
2008029	19	1.49602870795038e-17	1.91522974197977e-17
2008029	20	1.44401302554749e-17	1.84915268390647e-17
2008029	21	1.36122549613015e-17	1.78260413519245e-17
2008029	22	1.36369308017978e-17	1.79376039278052e-17
2008029	23	1.34053877022152e-17	1.77904539568898e-17
2008030	0	1.32745071638351e-17	1.75976635263502e-17
2008030	1	1.32915192635751e-17	1.75694981429186e-17
2008030	2	1.37514486436272e-17	1.77678654224948e-17
2008030	3	1.39310037260238e-17	1.79174854865687e-17
2008030	4	1.40500698509422e-17	1.80709005437862e-17
2008030	5	1.42397356880712e-17	1.85897752379447e-17
2008030	6	1.48493853466137e-17	1.95542331892996e-17
2008030	7	1.55661415866064e-17	2.04018699226465e-17
2008030	8	1.66471656739547e-17	2.16385115265424e-17
2008030	9	1.83846334149965e-17	2.3458278593824e-17
2008030	10	2.10255882714632e-17	2.57943073536197e-17
2008030	11	2.18149206814121e-17	2.68360354456136e-17
2008030	12	2.21852880516903e-17	2.73553318751357e-17
2008030	13	2.79884057834519e-17	3.33522066931695e-17
2008030	14	3.69898192931004e-17	4.24066281109037e-17
2008030	15	4.75258318403201e-17	5.21965181589313e-17
2008030	16	6.03008906453841e-17	6.53212131730457e-17
2008030	17	6.66055683923959e-17	7.09538209018683e-17
2008030	18	7.81972228997386e-17	8.57414520510851e-17
2008030	19	9.19307203539929e-17	1.02998845639593e-16
2008030	20	9.5512606059668e-17	1.05790292150137e-16
2008030	21	9.3132549686184e-17	1.02510031163407e-16
2008030	22	9.2023024670663e-17	1.01348885091978e-16
2008030	23	9.58215536969581e-17	1.05860910990477e-16
2008031	0	1.00720323235957e-16	1.12237340175018e-16
2008031	1	1.0063064428721e-16	1.11610817259973e-16
2008031	2	1.02135226440758e-16	1.13300757543601e-16
2008031	3	1.02762316883873e-16	1.14660364356037e-16
2008031	4	1.0079469855605e-16	1.15958376712895e-16
2008031	5	1.00094764242826e-16	1.16626691456083e-16
2008031	6	9.74720527090849e-17	1.17134241406067e-16
2008031	7	8.89023563959657e-17	1.17616225120012e-16
2008031	8	9.18336558789231e-17	1.16824670087145e-16
2008031	9	9.4354682440928e-17	1.14040824993639e-16
2008031	10	9.26541817660742e-17	1.09723378481354e-16
2008031	11	9.08351503880916e-17	1.06704121488935e-16
2008031	12	8.92306052849726e-17	1.01943766577203e-16
2008031	13	8.61925720145173e-17	9.68838626416914e-17
2008031	14	8.18041113601228e-17	9.03963904014702e-17
2008031	15	7.67979526050704e-17	8.38498813824391e-17
2008031	16	7.15601562702446e-17	7.75820165747663e-17
2008031	17	6.51071973001151e-17	7.00362959019448e-17
2008031	18	5.76474984878928e-17	6.15993143070844e-17
2008031	19	5.05408515114041e-17	5.36593550042553e-17
2008031	20	4.36757865409713e-17	4.60434477011827e-17
2008031	21	3.53390180501073e-17	3.6950864355554e-17
2008031	22	2.6142786307354e-17	2.76240327551672e-17
2008031	23	2.08423088447188e-17	2.33326870120217e-17
2008032	0	2.28115517283741e-17	2.79634269081851e-17
2008032	1	2.94066955647615e-17	3.76450235613069e-17
2008032	2	3.39959953855742e-17	4.15169870768887e-17
2008032	3	3.79564563009962e-17	4.49869986848397e-17
2008032	4	4.18144024383783e-17	4.8548231942972e-17
2008032	5	4.31018066702264e-17	4.84933984417803e-17
2008032	6	4.37453061780846e-17	4.80710396878157e-17
2008032	7	4.43722257989677e-17	4.88165959755225e-17
2008032	8	4.7928164272759e-17	5.21558669018053e-17
2008032	9	5.07696478348224e-17	5.54928963395845e-17
2008032	10	5.26760145438474e-17	5.86944431368217e-17
2008032	11	5.4484804242083e-17	6.14640402158668e-17
2008032	12	5.67292815104908e-17	6.44800833722027e-17
2008032	13	6.02734567600837e-17	6.83924808347673e-17
2008032	14	6.5014363625373e-17	7.37718712685803e-17
2008032	15	6.92901661819705e-17	7.90428592036483e-17
2008032	16	7.22926379561543e-17	8.12987716469518e-17
2008032	17	7.47297291752344e-17	8.35752701944085e-17
2008032	18	7.96116731654327e-17	8.96699964052673e-17
2008032	19	8.5388381085805e-17	9.66690646105757e-17
2008032	20	8.97538853272839e-17	1.01312457419125e-16
2008032	21	9.08333214610714e-17	1.02598751598719e-16
2008032	22	8.66659926485771e-17	9.84744154449117e-17
2008032	23	7.76402753136375e-17	8.67961003370267e-17
2008033	0	7.03718024355442e-17	7.7259011819138e-17
2008033	1	7.04559094718198e-17	8.21564400656347e-17
2008033	2	8.26267405399709e-17	1.01960818295834e-16
2008033	3	9.53296849796601e-17	1.16316223837e-16
2008033	4	1.08158502031479e-16	1.288251866676e-16
2008033	5	1.12769047021329e-16	1.32493819385086e-16
2008033	6	1.10595156380115e-16	1.2818485482239e-16
2008033	7	1.00731267041944e-16	1.18908596145452e-16
2008033	8	1.02766265316549e-16	1.23360776710572e-16
2008033	9	1.02137238501985e-16	1.22389876343451e-16
2008033	10	1.07929568694573e-16	1.29213904225989e-16
2008033	11	1.1359816010973e-16	1.35697789251757e-16
2008033	12	1.12368681970287e-16	1.33704287663347e-16
2008033	13	1.02578490457586e-16	1.22837177425538e-16
2008033	14	1.00402127539296e-16	1.21357001466034e-16
2008033	15	1.01874015592557e-16	1.20498613025469e-16
2008033	16	9.0667645611258e-17	1.04604921329561e-16
2008033	17	7.3290157422301e-17	8.36001370227016e-17
2008033	18	6.19055310987811e-17	6.98254382941263e-17
2008033	19	6.2763632034067e-17	6.97478374491584e-17
2008033	20	6.86862231127616e-17	7.47362808045935e-17
2008033	21	7.3195009686315e-17	7.80207642268209e-17
2008033	22	7.57121483812873e-17	8.05816990781009e-17
2008033	23	7.81688175825902e-17	8.34301534909922e-17
2008034	0	8.02929798754818e-17	8.600297333269e-17
2008034	1	8.13644760532471e-17	8.76512746815465e-17
2008034	2	8.1382618611865e-17	8.90382637224468e-17
2008034	3	8.18927504087038e-17	9.00699759258517e-17
2008034	4	8.25002822190324e-17	9.07619234351998e-17
2008034	5	8.16910061375801e-17	9.10395780927229e-17
2008034	6	8.10425400467679e-17	9.14812216463893e-17
2008034	7	8.02630047422504e-17	9.15725744510704e-17
2008034	8	7.90498886798267e-17	9.08311789624335e-17
2008034	9	7.95893982109747e-17	9.17152565671886e-17
2008034	10	8.17283881802295e-17	9.42745848145337e-17
2008034	11	8.12778171404437e-17	9.26468735650992e-17
2008034	12	7.91730035900466e-17	9.13602817960794e-17
2008034	13	7.8264311675832e-17	8.82783634062911e-17
2008034	14	7.69930025831283e-17	8.59860425006279e-17
2008034	15	7.57335128081344e-17	8.46995277534974e-17
2008034	16	7.358349636668e-17	8.22862892357492e-17
2008034	17	7.1153800786926e-17	7.86011379918248e-17
2008034	18	6.97077198348038e-17	7.61983219641271e-17
2008034	19	6.84986903573864e-17	7.45567640167509e-17
2008034	20	6.74204467419639e-17	7.37495363767184e-17
2008034	21	6.65503701942798e-17	7.30164859612849e-17
2008034	22	6.53492734808923e-17	7.21443756946566e-17
2008034	23	6.47494906882457e-17	7.12470897329715e-17
2008035	0	6.41007274826155e-17	7.04371866072669e-17
2008035	1	6.35986304466135e-17	6.96286210367075e-17
2008035	2	6.28899484150736e-17	6.88592389715195e-17
2008035	3	6.20687800230309e-17	6.81114291997025e-17
2008035	4	6.12797011913953e-17	6.74672770912771e-17
2008035	5	6.03198104708012e-17	6.69896360697379e-17
2008035	6	5.91555913560331e-17	6.64918619359609e-17
2008035	7	5.84509304987064e-17	6.58865180360883e-17
2008035	8	5.82127046714339e-17	6.55624245274803e-17
2008035	9	5.74884203747951e-17	6.47366028264818e-17
2008035	10	5.62053039304752e-17	6.34769853232519e-17
2008035	11	5.51019288945949e-17	6.21745505192666e-17
2008035	12	5.37966261135567e-17	6.0952658462633e-17
2008035	13	5.2454345917558e-17	5.92991135331303e-17
2008035	14	5.03564384854898e-17	5.67799529936761e-17
2008035	15	4.84590878490889e-17	5.4718027196012e-17
2008035	16	4.48230090593586e-17	5.10752222458985e-17
2008035	17	3.9630143575057e-17	4.60743088642687e-17
2008035	18	3.638837752299e-17	4.45833050421876e-17
2008035	19	3.61720353526523e-17	4.62477223482778e-17
2008035	20	3.80073343883953e-17	4.90475381584275e-17
2008035	21	3.93726880698199e-17	5.08372538308031e-17
2008035	22	4.20087870251393e-17	5.41823900406481e-17
2008035	23	4.76216783139457e-17	6.1085974071889e-17
2008036	0	5.3593451959683e-17	6.86423181649597e-17
2008036	1	5.83493838351174e-17	7.57146192486183e-17
2008036	2	6.65869920893186e-17	8.15509673388168e-17
2008036	3	7.64031177713843e-17	9.06295027725942e-17
2008036	4	8.02331968246101e-17	9.75209406658015e-17
2008036	5	7.98930257616597e-17	9.42347416388105e-17
2008036	6	7.93545537430621e-17	9.20307404336559e-17
2008036	7	8.17773147449131e-17	9.39037110281022e-17
2008036	8	8.60670646343386e-17	9.84841144466887e-17
2008036	9	9.04823673131479e-17	1.03560039403311e-16
2008036	10	9.37493787695416e-17	1.07035085070944e-16
2008036	11	9.32644890910163e-17	1.06143926770994e-16
2008036	12	8.89372316305895e-17	1.00665880647259e-16
2008036	13	8.02822478977252e-17	9.05482328141241e-17
2008036	14	7.0694850766137e-17	7.80638105385885e-17
2008036	15	5.54353214173364e-17	5.97195018842766e-17
2008036	16	5.30217683686917e-17	5.68931563498214e-17
2008036	17	5.09698878338227e-17	5.51880807510372e-17
2008036	18	4.46842129265478e-17	4.87500494839842e-17
2008036	19	4.04629203206617e-17	4.52001269226561e-17
2008036	20	3.99694148600707e-17	4.67410502835431e-17
2008036	21	4.23483487192304e-17	5.08221679606081e-17
2008036	22	4.25444325403865e-17	5.13319130701424e-17
2008036	23	3.99078335347279e-17	4.81287336295376e-17
2008037	0	3.03418821391636e-17	3.49905379252277e-17
2008037	1	4.10377046827808e-17	4.92109890186595e-17
2008037	2	7.14881736042694e-17	8.77152644086661e-17
2008037	3	1.02829591036504e-16	1.27559506060441e-16
2008037	4	1.1900861844418e-16	1.72258601812577e-16
2008037	5	1.14042501216986e-16	1.5018355655337e-16
2008037	6	9.45505809322023e-17	1.20781127669623e-16
2008037	7	7.26026648161254e-17	8.23001542285073e-17
2008037	8	9.68243306712965e-17	1.14748970825761e-16
2008037	9	1.15248209896149e-16	1.6769106317759e-16
2008037	10	7.36970594086535e-17	9.32710494919626e-17
2008037	11	4.57824772033966e-17	5.0279012374731e-17
2008037	12	5.01784262220249e-17	5.52742742355871e-17
2008037	13	5.56431430217608e-17	6.27529167483548e-17
2008037	14	6.62721894809456e-17	7.64935518881588e-17
2008037	15	9.01706068544401e-17	1.08078118479376e-16
2008037	16	1.02575806253681e-16	1.28411082442035e-16
2008037	17	1.23784911769293e-16	1.69149433702565e-16
2008037	18	1.23986972912383e-16	1.69187425732671e-16
2008037	19	1.24197361965189e-16	1.69025468528173e-16
2008037	20	1.24448222239322e-16	1.69055670530663e-16
2008037	21	1.11019102123475e-16	1.50207488431971e-16
2008037	22	1.25002520481987e-16	1.69243854613317e-16
2008037	23	1.25181989941187e-16	1.69075719516852e-16
2008038	0	1.25331091868112e-16	1.68887387500915e-16
2008038	1	1.29369567896762e-16	1.72583168049127e-16
2008038	2	1.26285728755296e-16	1.69778328976483e-16
2008038	3	1.25490437055059e-16	1.68698263190544e-16
2008038	4	1.2529095378499e-16	1.68450478408101e-16
2008038	5	1.25879960656421e-16	1.6976907843844e-16
2008038	6	1.25016455158334e-16	1.70018607755481e-16
2008038	7	1.23916022868628e-16	1.69400235665194e-16
2008038	8	1.13262252199678e-16	1.40083840109241e-16
2008038	9	1.05804143592252e-16	1.2625228762067e-16
2008038	10	9.92645787116273e-17	1.15352896037294e-16
2008038	11	9.52486875866171e-17	1.09457537924413e-16
2008038	12	9.1167365775113e-17	1.0142182844154e-16
2008038	13	8.75790337723852e-17	9.55335024679564e-17
2008038	14	8.48649224195503e-17	9.19070325256038e-17
2008038	15	8.27958217279548e-17	8.98367383114678e-17
2008038	16	7.96464390230659e-17	8.79586887074207e-17
2008038	17	7.614453755726e-17	8.58588661504556e-17
2008038	18	7.39825059964822e-17	8.60975790166613e-17
2008038	19	7.27166800311597e-17	8.72272759267951e-17
2008038	20	7.25621983666773e-17	8.82693230561437e-17
2008038	21	7.45695468285926e-17	8.90045618209401e-17
2008038	22	7.53581802909532e-17	8.98157940611503e-17
2008038	23	7.73607161267961e-17	9.02584858390168e-17
2008039	0	7.87404374870455e-17	9.05252672214093e-17
2008039	1	7.84447719925038e-17	9.05510072816827e-17
2008039	2	7.80371512202876e-17	9.04123661532241e-17
2008039	3	7.78231249940977e-17	9.06403749376145e-17
2008039	4	7.47397072481365e-17	9.08865283215995e-17
2008039	5	7.40068581779842e-17	9.11556146580884e-17
2008039	6	7.49411605617295e-17	9.08285595435606e-17
2008039	7	7.42264667884801e-17	9.03845727841955e-17
2008039	8	7.33224038630837e-17	8.99504162053901e-17
2008039	9	7.28035116286133e-17	8.94754570782285e-17
2008039	10	7.19196262578883e-17	8.78680307991388e-17
2008039	11	7.15761810564729e-17	8.81204500972796e-17
2008039	12	7.23898578999772e-17	9.1860381331847e-17
2008039	13	7.14747688321942e-17	9.08450588911533e-17
2008039	14	7.03995948995461e-17	8.96672577534695e-17
2008039	15	6.98006375142704e-17	8.92211570282702e-17
2008039	16	6.90783260220214e-17	8.83473138361964e-17
2008039	17	6.78542550538525e-17	8.64280017915418e-17
2008039	18	6.73138163651255e-17	8.5291619899227e-17
2008039	19	6.68117829651004e-17	8.48215483851926e-17
2008039	20	6.5268086430162e-17	8.27442834718344e-17
2008039	21	6.38620271832192e-17	8.09146390718735e-17
2008039	22	6.28618848773502e-17	7.98002124488847e-17
2008039	23	6.17447501648309e-17	7.97406460928943e-17
2008040	0	6.25572776489104e-17	8.20343024678191e-17
2008040	1	6.22428641564755e-17	8.17177676649862e-17
2008040	2	6.21150524570035e-17	8.17074059316985e-17
2008040	3	6.13694402045856e-17	8.21644936129084e-17
2008040	4	6.50047200944304e-17	8.96861812158101e-17
2008040	5	6.57514045752143e-17	9.09709120188635e-17
2008040	6	6.72920093773882e-17	9.40047991953336e-17
2008040	7	6.76183958828178e-17	9.4414196748194e-17
2008040	8	6.76438865351604e-17	9.36368746558181e-17
2008040	9	6.77211562783603e-17	9.3306128028503e-17
2008040	10	6.80446775485856e-17	9.38946485020705e-17
2008040	11	7.29935947966948e-17	1.01176128137209e-16
2008040	12	7.62208995111811e-17	1.08260780558889e-16
2008040	13	7.43862094682828e-17	1.05853913548201e-16
2008040	14	7.23474714406314e-17	1.02891999978035e-16
2008040	15	7.08823634567179e-17	1.00522465251411e-16
2008040	16	6.91139296680255e-17	9.7577267427525e-17
2008040	17	6.71760170810192e-17	9.44222308631954e-17
2008040	18	6.53560357167566e-17	9.1653346989945e-17
2008040	19	6.2574581155416e-17	8.92668836990817e-17
2008040	20	6.10210114046813e-17	8.80710131624919e-17
2008040	21	6.05910792354294e-17	8.73079301763747e-17
2008040	22	6.02851630375552e-17	8.59299775696192e-17
2008040	23	5.94018512625007e-17	8.45420206208881e-17
2008041	0	5.84781349506209e-17	8.29910154449085e-17
2008041	1	5.68472523387317e-17	8.15315057276714e-17
2008041	2	5.56235855069312e-17	8.00855830083788e-17
2008041	3	5.47985399565513e-17	7.84720646248786e-17
2008041	4	5.37952988434867e-17	7.61954341531524e-17
2008041	5	5.29208659381171e-17	7.42856412077638e-17
2008041	6	5.21063577042408e-17	7.25765641853394e-17
2008041	7	5.11345318817452e-17	7.06868770188987e-17
2008041	8	4.90421222046252e-17	6.88709231253944e-17
2008041	9	4.97492240634459e-17	7.20300375884646e-17
2008041	10	5.0234708644156e-17	7.18534782462582e-17
2008041	11	5.5872067636701e-17	7.73499220549136e-17
2008041	12	5.64278782989006e-17	7.86725698021437e-17
2008041	13	5.45770211947404e-17	7.6166377532038e-17
2008041	14	5.27402706736658e-17	7.38323338563375e-17
2008041	15	5.16699547223964e-17	7.14118302651062e-17
2008041	16	5.11233513105202e-17	6.96090029171287e-17
2008041	17	5.05621939773112e-17	6.78589130863363e-17
2008041	18	4.9931326843474e-17	6.61208662003243e-17
2008041	19	4.96226813586044e-17	6.45679630499865e-17
2008041	20	4.90620042785316e-17	6.33346421033415e-17
2008041	21	4.83206127025868e-17	6.20014757954115e-17
2008041	22	4.76546275962034e-17	6.07843459924105e-17
2008041	23	4.68688282528231e-17	5.97647722664539e-17
2008042	0	4.6311731355274e-17	5.89510937648203e-17
2008042	1	4.57989114812462e-17	5.83390151752043e-17
2008042	2	4.57532167021118e-17	5.78550309534567e-17
2008042	3	4.57749459192862e-17	5.73954873506997e-17
2008042	4	4.5763382330656e-17	5.69529860898927e-17
2008042	5	4.58959514052979e-17	5.6601118383936e-17
2008042	6	4.58773976979316e-17	5.62700197344748e-17
2008042	7	4.57108760591992e-17	5.58801118184684e-17
2008042	8	4.5611424754826e-17	5.5434487185955e-17
2008042	9	4.4195857381641e-17	5.49824974592606e-17
2008042	10	4.62003648079609e-17	6.14915167715227e-17
2008042	11	5.01230943974991e-17	6.94931228709552e-17
2008042	12	5.22233678410265e-17	7.36598725988249e-17
2008042	13	5.11669895222839e-17	7.23876355708405e-17
2008042	14	4.9630762196157e-17	7.13310867466579e-17
2008042	15	4.78404375335327e-17	6.89025098649346e-17
2008042	16	4.56707290818583e-17	6.56925859337414e-17
2008042	17	4.42996085290753e-17	6.38677375643155e-17
2008042	18	4.29485953101631e-17	6.23570696652187e-17
2008042	19	4.18403572843299e-17	6.1013097632651e-17
2008042	20	4.11545921287624e-17	5.97922473685786e-17
2008042	21	4.01238419166378e-17	5.85795148099962e-17
2008042	22	3.95216865577236e-17	5.72898402778234e-17
2008042	23	3.98150761618768e-17	5.61568706969563e-17
2008043	0	4.01177995613969e-17	5.53186173806233e-17
2008043	1	3.97448911355888e-17	5.45797975234428e-17
2008043	2	3.86443032449363e-17	5.38025782196794e-17
2008043	3	3.77201006687403e-17	5.30168798973376e-17
2008043	4	3.56259463631808e-17	5.21738813203488e-17
2008043	5	3.40502974312906e-17	5.13203805262426e-17
2008043	6	3.36588786454092e-17	5.03821071680459e-17
2008043	7	3.33317057759074e-17	4.92109633841525e-17
2008043	8	3.30145898130839e-17	4.77965254605164e-17
2008043	9	3.2423800619578e-17	4.62165797220652e-17
2008043	10	3.08096631165041e-17	4.48659892967056e-17
2008043	11	2.92021911867077e-17	4.57142087615225e-17
2008043	12	3.54752270794658e-17	5.01701039340862e-17
2008043	13	3.5688881677041e-17	4.90806788109752e-17
2008043	14	3.49845492653979e-17	4.80614518715071e-17
2008043	15	3.33126890944046e-17	4.73055365166036e-17
2008043	16	3.17724251492813e-17	4.65117158912544e-17
2008043	17	2.94499446357683e-17	4.56272050834027e-17
2008043	18	2.7462736884439e-17	4.42103838549965e-17
2008043	19	2.66279580547448e-17	4.29332816392013e-17
2008043	20	2.58052448110637e-17	4.17004111707437e-17
2008043	21	2.51029341756098e-17	4.06338542416641e-17
2008043	22	2.4580684454827e-17	3.97322606380768e-17
2008043	23	2.42908453970166e-17	3.89935643687216e-17
2008044	0	2.41230056395152e-17	3.82884413331301e-17
2008044	1	2.40011204328121e-17	3.75687223093669e-17
2008044	2	2.38082183776184e-17	3.66965117294495e-17
2008044	3	2.34460946838706e-17	3.56942841485809e-17
2008044	4	2.3091982667329e-17	3.48802815120653e-17
2008044	5	2.33914950128448e-17	3.4049170404729e-17
2008044	6	2.26913693700384e-17	3.30618973531734e-17
2008044	7	2.18928123344516e-17	3.20103386419784e-17
2008044	8	2.2661214920109e-17	3.32312491042004e-17
2008044	9	2.96790569568821e-17	3.99537267913102e-17
2008044	10	3.45271770444019e-17	4.87952068922551e-17
2008044	11	3.50542628752397e-17	5.00956386149962e-17
2008044	12	3.53810416938827e-17	5.01361167789456e-17
2008044	13	3.5396606645272e-17	4.98056372948721e-17
2008044	14	3.49105420016227e-17	4.91801634200614e-17
2008044	15	3.3365028838647e-17	4.86104142797881e-17
2008044	16	3.10675101797651e-17	4.80478657190591e-17
2008044	17	2.92912238387347e-17	4.76719695584651e-17
2008044	18	2.76989523224717e-17	4.59517127332973e-17
2008044	19	2.66578320133012e-17	4.40764909665884e-17
2008044	20	2.56920512630439e-17	4.25195970734249e-17
2008044	21	2.49592772987739e-17	4.13342525132593e-17
2008044	22	2.47716828822795e-17	4.06866644272164e-17
2008044	23	2.42204649888544e-17	4.05142701125327e-17
2008045	0	2.46242176133762e-17	4.05836911648196e-17
2008045	1	2.49930190010124e-17	4.06534440525863e-17
2008045	2	2.46221741352011e-17	4.05797272069346e-17
2008045	3	2.49093299897892e-17	4.00338004861068e-17
2008045	4	2.5070473281005e-17	3.92988012587266e-17
2008045	5	2.50192467481789e-17	3.83189459827615e-17
2008045	6	2.47409782756781e-17	3.71303553524809e-17
2008045	7	2.4506925334117e-17	3.63214422977318e-17
2008045	8	2.38137354194436e-17	3.64047795392791e-17
2008045	9	2.63632769561671e-17	4.07819159035439e-17
2008045	10	2.79373110671787e-17	4.22919591534483e-17
2008045	11	2.72835405861452e-17	3.83740155376776e-17
2008045	12	2.56285121917905e-17	3.45308141020551e-17
2008045	13	2.46883662967123e-17	3.22098994906147e-17
2008045	14	2.3591207032677e-17	3.0619911856581e-17
2008045	15	2.22843692584756e-17	2.87439157496994e-17
2008045	16	2.11193966384934e-17	2.68320075595845e-17
2008045	17	1.96264212147863e-17	2.46750724820732e-17
2008045	18	1.82753872235281e-17	2.20508280128384e-17
2008045	19	1.62833399426909e-17	1.89425243436752e-17
2008045	20	1.37124559338149e-17	1.56389865705854e-17
2008045	21	1.10904675475067e-17	1.24753795186491e-17
2008045	22	9.15656905919337e-18	9.97631032125689e-18
2008045	23	7.4977624682965e-18	8.10459487171363e-18
2008046	0	6.22040430816935e-18	6.71377352526905e-18
2008046	1	5.17796257826412e-18	5.53548924480088e-18
2008046	2	4.24523213694686e-18	4.50234307569282e-18
2008046	3	3.47700211132395e-18	3.68527462014465e-18
2008046	4	2.88231354934676e-18	3.01726002026268e-18
2008046	5	2.29720535624903e-18	2.38907015057122e-18
2008046	6	1.66571711863347e-18	1.73415546399224e-18
2008046	7	1.1512696049731e-18	1.19778066474861e-18
2008046	8	9.76303787132031e-19	1.03701740436868e-18
2008046	9	1.38572803986585e-18	1.52744033393322e-18
2008046	10	2.58074444271477e-18	2.8945756147775e-18
2008046	11	4.33111726201965e-18	4.85008722613924e-18
2008046	12	6.05528765587168e-18	6.70777300533882e-18
2008046	13	7.32842910006642e-18	8.06197812438616e-18
2008046	14	8.42907046071376e-18	9.18701947957719e-18
2008046	15	9.39582334690257e-18	1.0159376529032e-17
2008046	16	1.02172875674257e-17	1.09375694246434e-17
2008046	17	1.10515974915032e-17	1.16904460584241e-17
2008046	18	1.19743247958415e-17	1.25423340825192e-17
2008046	19	1.31343285624368e-17	1.36857114809683e-17
2008046	20	1.44878399386407e-17	1.50602906985785e-17
2008046	21	1.57969681458069e-17	1.64421981478126e-17
2008046	22	1.67934693008991e-17	1.74924058999251e-17
2008046	23	1.73976032189266e-17	1.81628717275525e-17
2008047	0	1.73268918297807e-17	1.81021475526407e-17
2008047	1	1.67175416594462e-17	1.74469672391477e-17
2008047	2	1.61637277905824e-17	1.68901104621644e-17
2008047	3	1.57166916543776e-17	1.65056688597977e-17
2008047	4	1.51219165725507e-17	1.59466724022792e-17
2008047	5	1.45725286023499e-17	1.54027573324684e-17
2008047	6	1.40594768415072e-17	1.49002246734571e-17
2008047	7	1.36359907824646e-17	1.44740983196723e-17
2008047	8	1.34729754529786e-17	1.42974513111701e-17
2008047	9	1.36656035508442e-17	1.46174360200482e-17
2008047	10	1.33748385226735e-17	1.43191663815195e-17
2008047	11	1.30905677000812e-17	1.4051049303645e-17
2008047	12	1.26597779170405e-17	1.36616594006793e-17
2008047	13	1.2041965788309e-17	1.29479694342226e-17
2008047	14	1.12640216624406e-17	1.21533434206633e-17
2008047	15	1.06303956261899e-17	1.14580963374602e-17
2008047	16	1.01451959637635e-17	1.0904740614918e-17
2008047	17	9.70893352185189e-18	1.03857161151155e-17
2008047	18	9.25410827414034e-18	9.78174760177849e-18
2008047	19	8.9944455997097e-18	9.4691894832526e-18
2008047	20	9.01640729659662e-18	9.52030864074045e-18
2008047	21	8.86048037519376e-18	9.31781127034051e-18
2008047	22	8.68120599947603e-18	9.13570474742872e-18
2008047	23	8.6340700909617e-18	9.11439092681545e-18
2008048	0	8.47042509736275e-18	8.98123221795485e-18
2008048	1	8.35651138378851e-18	8.9061705151228e-18
2008048	2	8.26524107758135e-18	8.82746005350729e-18
2008048	3	8.19888846295182e-18	8.7833190742014e-18
2008048	4	8.17708372286489e-18	8.74237701044e-18
2008048	5	8.12495590157895e-18	8.62857562818833e-18
2008048	6	8.04193218062695e-18	8.44951223974068e-18
2008048	7	8.0549254621047e-18	8.26090788226609e-18
2008048	8	7.93779308980108e-18	8.0913441118268e-18
2008048	9	7.85510174472287e-18	7.97736717932238e-18
2008048	10	7.91289114092675e-18	8.06214307966375e-18
2008048	11	7.92960504805043e-18	8.11797237699388e-18
2008048	12	7.79221554847488e-18	7.98219879340543e-18
2008048	13	7.5319296333382e-18	7.72514397519119e-18
2008048	14	7.22919986374032e-18	7.44044071545549e-18
2008048	15	7.06723884655235e-18	7.37782969699064e-18
2008048	16	6.83316187932171e-18	7.17478841122643e-18
2008048	17	6.58174734795523e-18	6.92255279612336e-18
2008048	18	6.42340607653933e-18	6.77396939099441e-18
2008048	19	6.34723508665048e-18	6.6846521011556e-18
2008048	20	6.30362601196043e-18	6.61504915552595e-18
2008048	21	6.4294054586638e-18	6.73133746518117e-18
2008048	22	6.64504435257906e-18	6.93467224327804e-18
2008048	23	6.79057615234609e-18	7.06126640001549e-18
2008049	0	6.98145801152001e-18	7.26719906241961e-18
2008049	1	7.23461897767037e-18	7.57903876638527e-18
2008049	2	7.55018931289981e-18	7.98237844310137e-18
2008049	3	7.97394869570085e-18	8.5616712019373e-18
2008049	4	8.50966777845374e-18	9.41592024964918e-18
2008049	5	9.24878710575026e-18	1.05475108755002e-17
2008049	6	9.88196094415293e-18	1.1450553395364e-17
2008049	7	1.04138210652831e-17	1.22025679744164e-17
2008049	8	1.08904340499817e-17	1.2881963148541e-17
2008049	9	1.12962046020613e-17	1.34874672710652e-17
2008049	10	1.1475486161826e-17	1.38206829891258e-17
2008049	11	1.15803132042547e-17	1.40064276971689e-17
2008049	12	1.14747186342908e-17	1.40558008246516e-17
2008049	13	1.08773935931236e-17	1.37980789520486e-17
2008049	14	1.01259408434185e-17	1.3353231818235e-17
2008049	15	9.40653822171584e-18	1.27607583093858e-17
2008049	16	8.86346145649253e-18	1.22961334984013e-17
2008049	17	8.68007800151991e-18	1.21190608488249e-17
2008049	18	8.35804503178886e-18	1.15663264409176e-17
2008049	19	8.0009371916927e-18	1.10561767215716e-17
2008049	20	7.70766471881889e-18	1.0768127939703e-17
2008049	21	7.43938522000797e-18	1.05361448359029e-17
2008049	22	7.22726398206201e-18	1.03007687112189e-17
2008049	23	7.09911004646528e-18	1.00715764087912e-17
2008050	0	6.98934323635335e-18	9.89607358756614e-18
2008050	1	6.870776772976e-18	9.75836052812787e-18
2008050	2	6.7199851626756e-18	9.62910475287748e-18
2008050	3	6.55183204154787e-18	9.50826712801701e-18
2008050	4	6.37083326007585e-18	9.39801845098368e-18
2008050	5	6.24247357527173e-18	9.31340243640519e-18
2008050	6	6.09993810843965e-18	9.19842105996316e-18
2008050	7	5.97668952276295e-18	9.07815505947057e-18
2008050	8	5.94100100640044e-18	8.94702192464038e-18
2008050	9	6.03036235670965e-18	8.92696476469806e-18
2008050	10	5.92628209631446e-18	8.58975748721326e-18
2008050	11	6.01522194963152e-18	8.53518937853587e-18
2008050	12	6.07004024327098e-18	8.6288107173735e-18
2008050	13	6.03615865286101e-18	8.77103828997244e-18
2008050	14	5.94590152378438e-18	8.94759029466844e-18
2008050	15	5.8103903214908e-18	8.96578368512882e-18
2008050	16	5.84378106336138e-18	9.0132203417583e-18
2008050	17	6.0221131225971e-18	9.07834291381925e-18
2008050	18	6.33188190827356e-18	9.16535575720067e-18
2008050	19	6.60093873336598e-18	9.22908930980912e-18
2008050	20	6.98810893700768e-18	9.26516563306002e-18
2008050	21	7.12224846734461e-18	9.28041934193712e-18
2008050	22	7.39505202952057e-18	9.26921782065627e-18
2008050	23	7.49884261564979e-18	9.21504433214421e-18
2008051	0	7.52171397811883e-18	9.13521513011528e-18
2008051	1	7.46191108318909e-18	9.0460673079071e-18
2008051	2	7.35416290833624e-18	8.97657399919956e-18
2008051	3	7.18330473575881e-18	8.88358310125579e-18
2008051	4	6.84094160622256e-18	8.74091071379029e-18
2008051	5	6.5925109925415e-18	8.54971344491589e-18
2008051	6	6.27172451488278e-18	8.3178433442696e-18
2008051	7	5.9218368122046e-18	8.06498604164016e-18
2008051	8	5.58084426826389e-18	7.80839041415228e-18
2008051	9	5.98002203053592e-18	8.09023875558249e-18
2008051	10	6.62836760726582e-18	8.7328395027748e-18
2008051	11	7.42122232368466e-18	9.57551884617043e-18
2008051	12	8.18866174456055e-18	1.03709186564056e-17
2008051	13	8.68082920481888e-18	1.08618107883803e-17
2008051	14	9.08650079666726e-18	1.14067786444675e-17
2008051	15	9.39203187788916e-18	1.19741643690739e-17
2008051	16	9.69177900458831e-18	1.25897593482602e-17
2008051	17	9.87118707056152e-18	1.30819053732237e-17
2008051	18	9.90986815415913e-18	1.34453279985237e-17
2008051	19	9.89092178172294e-18	1.37549573840881e-17
2008051	20	1.0005515473077e-17	1.43275296292502e-17
2008051	21	1.03162313538934e-17	1.50477660503669e-17
2008051	22	1.09491458787662e-17	1.58094527170163e-17
2008051	23	1.13452049355815e-17	1.65688939521052e-17
2008052	0	1.15839092799246e-17	1.7228343691536e-17
2008052	1	1.2057792902283e-17	1.77020926557735e-17
2008052	2	1.23106428929898e-17	1.7997474881059e-17
2008052	3	1.26286305756022e-17	1.8129910236381e-17
2008052	4	1.3227509551515e-17	1.82418925100076e-17
2008052	5	1.47950559066286e-17	1.94494778042752e-17
2008052	6	1.67003414261721e-17	2.18960582908823e-17
2008052	7	1.74397519462832e-17	2.33601512389742e-17
2008052	8	1.70467380394827e-17	2.33883109973194e-17
2008052	9	1.78420410203539e-17	2.37496081463056e-17
2008052	10	2.0142380167047e-17	2.44073615333813e-17
2008052	11	2.08738937582713e-17	2.46220623209962e-17
2008052	12	2.10044882892872e-17	2.55373102247343e-17
2008052	13	2.15856564561299e-17	2.6922765676981e-17
2008052	14	2.37961552089124e-17	3.00882221373997e-17
2008052	15	2.55215163228168e-17	3.30258810856273e-17
2008052	16	2.3955281155193e-17	3.08990713953771e-17
2008052	17	2.09939270084936e-17	2.6564346476307e-17
2008052	18	1.76210415988901e-17	2.16843720972393e-17
2008052	19	1.4380502519389e-17	1.73550380756559e-17
2008052	20	1.15535498382165e-17	1.37127950782563e-17
2008052	21	8.79645931243963e-18	1.03368333382868e-17
2008052	22	6.68308441792879e-18	7.76725209223076e-18
2008052	23	5.08177812638851e-18	5.976763727172e-18
2008053	0	3.88127308363207e-18	4.54419397860402e-18
2008053	1	2.80178621343283e-18	3.26804847153783e-18
2008053	2	1.92013837159121e-18	2.24577609150204e-18
2008053	3	1.36298765515522e-18	1.60615273901586e-18
2008053	4	1.0930202868343e-18	1.30417946934433e-18
2008053	5	9.93926427366872e-19	1.20425230284303e-18
2008053	6	1.23887162863739e-18	1.55041890595155e-18
2008053	7	2.52316898594976e-18	3.27218672904005e-18
2008053	8	6.33779085479356e-18	8.41514990281621e-18
2008053	9	9.65214830061482e-18	1.27550995372165e-17
2008053	10	1.21606934735146e-17	1.58280046909986e-17
2008053	11	1.27189494082538e-17	1.61281721516098e-17
2008053	12	1.14709413552588e-17	1.42050021637294e-17
2008053	13	9.95768848337172e-18	1.21388385525538e-17
2008053	14	8.74062093592198e-18	1.05574093150039e-17
2008053	15	7.67759091979599e-18	9.28254911956946e-18
2008053	16	6.24761795887722e-18	7.52120725802021e-18
2008053	17	4.95949321677827e-18	5.84990799396274e-18
2008053	18	3.83770559908523e-18	4.27863630084836e-18
2008053	19	2.84677138347598e-18	3.05401795922731e-18
2008053	20	2.66896414485812e-18	2.83480738757903e-18
2008053	21	3.95432566461529e-18	4.09762167193261e-18
2008053	22	2.22579319839216e-17	2.37205756939392e-17
2008053	23	7.07544222067385e-17	8.32146942068828e-17
2008054	0	9.7714043727232e-17	1.17255498684021e-16
2008054	1	1.05135714504731e-16	1.25224762438088e-16
2008054	2	1.03461616033913e-16	1.23354697450709e-16
2008054	3	9.7912950248161e-17	1.18487269648843e-16
2008054	4	9.61560779931311e-17	1.16331833095014e-16
2008054	5	9.65940447721322e-17	1.15516620068049e-16
2008054	6	9.65335540916799e-17	1.11335924189657e-16
2008054	7	9.12758650863118e-17	1.00964860787451e-16
2008054	8	8.77220939450579e-17	1.0095502975318e-16
2008054	9	8.03398400291065e-17	9.037577284745e-17
2008054	10	7.34727696451064e-17	8.13339901291735e-17
2008054	11	6.67615323568687e-17	7.38175817983771e-17
2008054	12	6.00957752240808e-17	6.63089216197516e-17
2008054	13	5.36288492628804e-17	5.96101487555572e-17
2008054	14	4.7234652980076e-17	5.214920059573e-17
2008054	15	4.15334809948539e-17	4.56483612587669e-17
2008054	16	3.72749730284824e-17	4.06861950111793e-17
2008054	17	3.22293634219999e-17	3.60662403008011e-17
2008054	18	2.58362160987159e-17	3.06041399399042e-17
2008054	19	2.03250411686654e-17	2.47928747551579e-17
2008054	20	1.58380042270393e-17	1.9476657077589e-17
2008054	21	1.18069674520719e-17	1.48069335296869e-17
2008054	22	8.53814708798902e-18	1.11841472448044e-17
2008054	23	6.64115576081751e-18	8.89646897313224e-18
2008055	0	6.14443118723772e-18	7.99602827302689e-18
2008055	1	6.25098717634375e-18	8.01846872751872e-18
2008055	2	6.81165565825189e-18	8.69002036024739e-18
2008055	3	7.85814776521005e-18	9.98814012672588e-18
2008055	4	9.67730708015558e-18	1.24519685387807e-17
2008055	5	1.36053261003911e-17	1.76417494441726e-17
2008055	6	1.8838660359193e-17	2.47811995483942e-17
2008055	7	2.21602601932964e-17	2.96140571778066e-17
2008055	8	2.56993212123643e-17	3.3762520433585e-17
2008055	9	2.81517370176171e-17	3.64617237066164e-17
2008055	10	2.92426346402584e-17	3.63086881014583e-17
2008055	11	2.76335331466067e-17	3.30886163436601e-17
2008055	12	2.68662994509677e-17	3.23315725237911e-17
2008055	13	2.76029117618284e-17	3.39148293509261e-17
2008055	14	2.65166739749921e-17	3.26444634094617e-17
2008055	15	2.40201799646882e-17	2.96602441104247e-17
2008055	16	2.19351621715158e-17	2.67487588795507e-17
2008055	17	1.89749436115547e-17	2.30709626012133e-17
2008055	18	1.68251181541452e-17	2.02692456743862e-17
2008055	19	1.61007070671235e-17	1.89617892595369e-17
2008055	20	1.6257752603321e-17	1.93175726846529e-17
2008055	21	1.86722460435462e-17	2.29948876764955e-17
2008055	22	2.520215331466e-17	3.26975465239267e-17
2008055	23	2.54424025599061e-17	3.3809013200656e-17
2008056	0	2.33687067415459e-17	3.11999184004359e-17
2008056	1	2.35148451051338e-17	3.14959888714578e-17
2008056	2	2.34414786711118e-17	3.28057252132255e-17
2008056	3	2.22642970844039e-17	3.09059237129777e-17
2008056	4	1.99168598923739e-17	2.72838152387538e-17
2008056	5	2.03502542039232e-17	2.30088077446682e-17
2008056	6	2.98372416770522e-17	3.29176537818652e-17
2008056	7	4.03324013917979e-17	4.43367087447924e-17
2008056	8	4.75329615427581e-17	5.16600545304887e-17
2008056	9	5.40959495866092e-17	5.95028680410591e-17
2008056	10	6.13153759380686e-17	6.9026865481506e-17
2008056	11	7.00552871940846e-17	8.22657308382406e-17
2008056	12	7.34555588360191e-17	8.73810938736729e-17
2008056	13	7.28061962387137e-17	8.57306354077395e-17
2008056	14	7.09526303728265e-17	8.33071101386869e-17
2008056	15	6.75292454349341e-17	7.89480588257195e-17
2008056	16	6.36430245004979e-17	7.32523978513007e-17
2008056	17	6.01947818534185e-17	6.79879604387799e-17
2008056	18	5.71775356434243e-17	6.3670999925255e-17
2008056	19	5.30603305972682e-17	6.03775822347528e-17
2008056	20	4.678604883248e-17	5.66881248610575e-17
2008056	21	3.9080910090421e-17	5.21918966699126e-17
2008056	22	3.50189294457256e-17	5.17074145770304e-17
2008056	23	4.0744389534627e-17	6.88544966127759e-17
2008057	0	6.20509077179105e-17	1.08750234588948e-16
2008057	1	8.67248078603951e-17	1.48989485173953e-16
2008057	2	1.04475343513941e-16	1.84990920784044e-16
2008057	3	1.08836611220666e-16	1.85311665360316e-16
2008057	4	1.03604660343194e-16	1.59496449662864e-16
2008057	5	8.22141431358703e-17	1.19005087170818e-16
2008057	6	9.27235924342639e-17	1.37829577340652e-16
2008057	7	1.06376322231719e-16	1.58145614948152e-16
2008057	8	8.32672989988881e-17	1.1421050403457e-16
2008057	9	6.91392803565426e-17	9.07180464376299e-17
2008057	10	5.45364593422363e-17	6.72194839009243e-17
2008057	11	4.15220483123318e-17	4.84543460489113e-17
2008057	12	3.2715984236499e-17	3.68459322475238e-17
2008057	13	2.57458365039452e-17	2.83806133797596e-17
2008057	14	1.98067164279446e-17	2.16729989429449e-17
2008057	15	1.56299312888969e-17	1.61711003311096e-17
2008057	16	1.12380005719973e-17	1.14251064336181e-17
2008057	17	1.17694350248714e-17	1.25508261690245e-17
2008057	18	1.93370392372453e-17	2.1215475299961e-17
2008057	19	3.27412119657543e-17	3.61250998411117e-17
2008057	20	4.30168957388648e-17	4.74790534303771e-17
2008057	21	4.87270655393616e-17	5.42407086196396e-17
2008057	22	4.91835312627334e-17	5.4453676647925e-17
2008057	23	4.45190630135122e-17	4.84967665248897e-17
2008058	0	3.71684578124432e-17	3.99118435924349e-17
2008058	1	3.00093864203902e-17	3.31838044158949e-17
2008058	2	2.53995830521381e-17	2.86669559168341e-17
2008058	3	2.39354268323074e-17	2.7363472209652e-17
2008058	4	2.36554709821994e-17	2.68679113961917e-17
2008058	5	2.21746216645657e-17	2.46240466715903e-17
2008058	6	2.33662792215838e-17	2.57337116680766e-17
2008058	7	2.91669618831803e-17	3.23081669746019e-17
2008058	8	3.67611419115623e-17	4.06805902619334e-17
2008058	9	4.44514933697056e-17	4.91516119639627e-17
2008058	10	5.18085005505641e-17	5.85715257086876e-17
2008058	11	7.42773800773763e-17	9.4504984586376e-17
2008058	12	1.23034949760328e-16	1.69316681517456e-16
2008058	13	1.23227056126622e-16	1.69258339016424e-16
2008058	14	1.22841016268043e-16	1.69125777418404e-16
2008058	15	9.30976740434392e-17	1.12396461142407e-16
2008058	16	9.00823247986513e-17	1.02771432430905e-16
2008058	17	8.71477272957705e-17	9.83701828795297e-17
2008058	18	9.34816387395638e-17	1.1547214339556e-16
2008058	19	1.20864490997363e-16	1.68655719145666e-16
2008058	20	1.23995226509159e-16	1.69158920804612e-16
2008058	21	9.32108872298511e-17	1.16006041853709e-16
2008058	22	9.27391103415294e-17	1.08167939718437e-16
2008058	23	8.77136753154376e-17	1.0031393395429e-16
2008059	0	8.19432613344043e-17	9.24191986471381e-17
2008059	1	7.76652757607497e-17	8.7220770923402e-17
2008059	2	7.45826371940326e-17	8.23203354678343e-17
2008059	3	7.18545973732728e-17	7.84407079963054e-17
2008059	4	7.06246585361766e-17	7.65950724896689e-17
2008059	5	6.98507691490391e-17	7.68503956187263e-17
2008059	6	6.89394817264723e-17	7.87231664476272e-17
2008059	7	7.18794927133109e-17	8.15852499848525e-17
2008059	8	7.40330600191043e-17	8.43413277644485e-17
2008059	9	7.42527797374196e-17	8.60307324769883e-17
2008059	10	7.34834214022448e-17	8.65719063110369e-17
2008059	11	7.272178184989e-17	8.67233328820677e-17
2008059	12	7.13850442317715e-17	8.363180819511e-17
2008059	13	7.08693173136987e-17	8.25971353834205e-17
2008059	14	7.10969991084748e-17	8.23238994173502e-17
2008059	15	7.18476663402649e-17	8.32134450279129e-17
2008059	16	7.23135262788381e-17	8.45245065963343e-17
2008059	17	7.14121691962726e-17	8.5962307509798e-17
2008059	18	6.9510982688523e-17	8.62440727854524e-17
2008059	19	6.76379446606217e-17	8.54179883866791e-17
2008059	20	6.39195091502051e-17	8.29003681363726e-17
2008059	21	5.43080070113354e-17	7.29227658709727e-17
2008059	22	4.29003884651842e-17	5.80797498450982e-17
2008059	23	3.51165021996724e-17	4.77173625397165e-17
2008060	0	3.07307847227711e-17	4.10033053244121e-17
2008060	1	2.83071285419037e-17	3.70258703300432e-17
2008060	2	2.58143040373776e-17	3.46057665393299e-17
2008060	3	2.46620831563781e-17	3.32726838067191e-17
2008060	4	2.38739612124669e-17	3.30451594236653e-17
2008060	5	2.40568003293759e-17	3.38388614703456e-17
2008060	6	2.51288198038666e-17	3.5595007806226e-17
2008060	7	2.90975520343007e-17	3.96899768016555e-17
2008060	8	3.46432063819527e-17	4.43125009369003e-17
2008060	9	3.67393379153335e-17	4.57036140264534e-17
2008060	10	3.86277796567859e-17	4.68593119555334e-17
2008060	11	3.96350591217414e-17	4.74240180061057e-17
2008060	12	3.98420417794512e-17	4.79936849980708e-17
2008060	13	4.00340042976374e-17	4.86759765847741e-17
2008060	14	5.17712132029861e-17	6.63733674515015e-17
2008060	15	6.00831862652882e-17	7.73866023782154e-17
2008060	16	1.20513262024948e-16	1.74320654376263e-16
2008060	17	7.68237329669672e-17	9.86062136338126e-17
2008060	18	5.08156217958818e-17	5.9913328266288e-17
2008060	19	4.07090017378957e-17	4.72422628072837e-17
2008060	20	3.21654632850498e-17	3.63044773752191e-17
2008060	21	2.01887603926726e-17	2.27262450957068e-17
2008060	22	9.61863166819766e-18	1.03393004737652e-17
2008060	23	9.00316706273523e-18	9.44847665817077e-18
