# Supplementary material for: A comparison of sea salt emission parameterizations in northwestern Europe using a chemistry transport model setup
Source: Copernicus journal article supplement (doi:10.5194/acp-16-9905-2016), 2016-08-08
Supplement: Supplementary file 2 [file acp-16-9905-2016-supplement.zip › conc/conc.timeseries.values.win2008.zero.Na.DE0044R.csv]

doy	hour	pm2.5	pm10
2008001	0	2.71608129024623e-17	2.94948040861298e-17
2008001	1	2.64510819207172e-17	2.91267994536103e-17
2008001	2	2.46439268401716e-17	2.7187825918571e-17
2008001	3	2.29340639958261e-17	2.58306957649641e-17
2008001	4	2.15300833301386e-17	2.49614645612738e-17
2008001	5	2.09269064415147e-17	2.45253058342613e-17
2008001	6	2.07412386241947e-17	2.46096784257459e-17
2008001	7	2.11090259894747e-17	2.50319927726414e-17
2008001	8	2.14060187361226e-17	2.57346006277758e-17
2008001	9	2.28371907957725e-17	2.76043104918926e-17
2008001	10	2.50039050907496e-17	3.04086845729659e-17
2008001	11	2.65169804757416e-17	3.19596705211865e-17
2008001	12	2.95830929865606e-17	3.44418736977842e-17
2008001	13	3.25627465633859e-17	3.76228561098065e-17
2008001	14	3.56537561543387e-17	4.1425095970995e-17
2008001	15	3.69808486449078e-17	4.28544358321919e-17
2008001	16	3.72907591398551e-17	4.27300602210058e-17
2008001	17	3.7336102501976e-17	4.2626010648467e-17
2008001	18	3.71451475036334e-17	4.26320717135341e-17
2008001	19	3.68613911938809e-17	4.2459013270841e-17
2008001	20	3.6184011216598e-17	4.234178473111e-17
2008001	21	3.5428239641803e-17	4.20137516696836e-17
2008001	22	3.44885835529904e-17	4.15919820156501e-17
2008001	23	3.33052696873116e-17	4.1030383487466e-17
2008002	0	3.26478177167345e-17	4.0515140882958e-17
2008002	1	3.18674651177865e-17	3.99884758627986e-17
2008002	2	3.13723010457396e-17	3.94750472667868e-17
2008002	3	3.15095336289822e-17	3.90659533146961e-17
2008002	4	3.17583494016055e-17	3.88871490822222e-17
2008002	5	3.14625178842141e-17	3.96429649278207e-17
2008002	6	3.12863098497674e-17	4.08947788373445e-17
2008002	7	3.29745633149283e-17	4.28977859186055e-17
2008002	8	3.56532648529775e-17	4.47732740268324e-17
2008002	9	3.82061268862413e-17	4.49091610403575e-17
2008002	10	3.84696932366838e-17	4.25267750765206e-17
2008002	11	3.5715750996556e-17	3.81831985283949e-17
2008002	12	3.12685541473176e-17	3.34358018070541e-17
2008002	13	2.77418845293257e-17	2.98207903827399e-17
2008002	14	2.49978073614955e-17	2.70807130158762e-17
2008002	15	2.12585714968732e-17	2.30768477835752e-17
2008002	16	1.75741456550992e-17	1.90487082568907e-17
2008002	17	1.5286487782323e-17	1.65706453223881e-17
2008002	18	1.41895342722442e-17	1.55313070511888e-17
2008002	19	1.32486887455113e-17	1.45952106443598e-17
2008002	20	1.25052741715986e-17	1.3741547772993e-17
2008002	21	1.16991267022437e-17	1.27933090011102e-17
2008002	22	1.09202203854907e-17	1.18858147963274e-17
2008002	23	1.04495479888473e-17	1.13617797678996e-17
2008003	0	1.04375612965543e-17	1.13515854341371e-17
2008003	1	1.0330415883807e-17	1.1163250877951e-17
2008003	2	9.33319309555514e-18	9.96957317199827e-18
2008003	3	8.31197488670357e-18	8.91977746015454e-18
2008003	4	8.34748043673852e-18	8.9203107566678e-18
2008003	5	9.26235047405125e-18	9.9351071606181e-18
2008003	6	9.66996126605919e-18	1.03088226573887e-17
2008003	7	9.46204407169511e-18	1.00549380409087e-17
2008003	8	9.6470162437634e-18	1.03032082307776e-17
2008003	9	1.02949417919087e-17	1.11038639043486e-17
2008003	10	1.13576923107312e-17	1.22702657278888e-17
2008003	11	1.27218528124319e-17	1.3747527934574e-17
2008003	12	1.39493918712657e-17	1.50420306458059e-17
2008003	13	1.44150622695421e-17	1.54537458221255e-17
2008003	14	1.53392111791689e-17	1.65208941085408e-17
2008003	15	1.58545657179004e-17	1.71931024862945e-17
2008003	16	1.52413745413117e-17	1.66056571492378e-17
2008003	17	1.46712467085167e-17	1.5992750093686e-17
2008003	18	1.47443598761723e-17	1.6037520492237e-17
2008003	19	1.49384003924512e-17	1.62662261799163e-17
2008003	20	1.506127037999e-17	1.64889261895076e-17
2008003	21	1.50886141368109e-17	1.66452058606143e-17
2008003	22	1.52523123851664e-17	1.69580243534733e-17
2008003	23	1.55579230013282e-17	1.74033453636885e-17
2008004	0	1.58592623614656e-17	1.77929663441831e-17
2008004	1	1.60989547723533e-17	1.80812212756502e-17
2008004	2	1.63359196646811e-17	1.84077248157295e-17
2008004	3	1.66543738775578e-17	1.87996665049882e-17
2008004	4	1.69437405423437e-17	1.91885533892197e-17
2008004	5	1.70974482750398e-17	1.94846027781199e-17
2008004	6	1.71033152678871e-17	1.95245998424105e-17
2008004	7	1.69782364769483e-17	1.9335627646043e-17
2008004	8	1.69700995046817e-17	1.92638374354984e-17
2008004	9	1.81231175704014e-17	2.04567403158455e-17
2008004	10	1.84553119684692e-17	2.05048040840611e-17
2008004	11	1.83738141673542e-17	2.02188254035961e-17
2008004	12	1.82729438842856e-17	1.96795315879544e-17
2008004	13	1.82458131182292e-17	1.93426910315643e-17
2008004	14	1.83416899215633e-17	1.93586443206757e-17
2008004	15	1.84450524824324e-17	1.93975155527202e-17
2008004	16	1.84895163918204e-17	1.92773585779752e-17
2008004	17	1.83035154766306e-17	1.89520747271037e-17
2008004	18	1.83784694566095e-17	1.90067565042658e-17
2008004	19	1.85981307678293e-17	1.92700075017677e-17
2008004	20	1.87724155272194e-17	1.95049678486682e-17
2008004	21	1.89976848118717e-17	1.97782678010655e-17
2008004	22	1.9389465934418e-17	2.02117016305164e-17
2008004	23	1.99929771386008e-17	2.08660475959494e-17
2008005	0	2.08038832439107e-17	2.17267120582592e-17
2008005	1	2.20271898242337e-17	2.32302137634092e-17
2008005	2	2.60883744474904e-17	2.86603678958264e-17
2008005	3	2.91708534858553e-17	3.27947786974886e-17
2008005	4	3.19946446190263e-17	3.65432224985223e-17
2008005	5	3.45834448731772e-17	3.99472713851191e-17
2008005	6	3.67330819991679e-17	4.26036250841258e-17
2008005	7	3.85490535295592e-17	4.4760954754682e-17
2008005	8	4.03963434224409e-17	4.70015971751004e-17
2008005	9	4.24446054727035e-17	4.93151305348259e-17
2008005	10	4.44142528232263e-17	5.14866086742343e-17
2008005	11	4.65335604632378e-17	5.39798997597782e-17
2008005	12	4.78083654584961e-17	5.556868132205e-17
2008005	13	4.83465437144278e-17	5.60898941764161e-17
2008005	14	4.95317452784991e-17	5.7481010675062e-17
2008005	15	5.07141173099329e-17	5.91720513219617e-17
2008005	16	4.97415493881459e-17	5.87384015138299e-17
2008005	17	4.52335523400331e-17	5.43388834874041e-17
2008005	18	4.13281460761542e-17	4.98519078989131e-17
2008005	19	3.84664075822038e-17	4.64254375644719e-17
2008005	20	3.67992344541333e-17	4.45539170212211e-17
2008005	21	3.53290536715022e-17	4.38882479783738e-17
2008005	22	3.49764541024909e-17	4.40251772124639e-17
2008005	23	3.47705284164898e-17	4.44397379504551e-17
2008006	0	3.46164611492543e-17	4.5129098512491e-17
2008006	1	3.4568282590697e-17	4.58793411946641e-17
2008006	2	3.53347685696444e-17	4.64270992570899e-17
2008006	3	3.60122159706218e-17	4.64792120828662e-17
2008006	4	3.66730629473123e-17	4.62881214533494e-17
2008006	5	3.74340098584992e-17	4.60235224837996e-17
2008006	6	3.74184363710876e-17	4.57219975643639e-17
2008006	7	3.57821702258564e-17	4.52555305215182e-17
2008006	8	3.54604040828049e-17	4.47999433780519e-17
2008006	9	3.46598830369514e-17	4.40952325375283e-17
2008006	10	3.28753127654512e-17	4.27082305711759e-17
2008006	11	3.05709921660569e-17	4.07374973300599e-17
2008006	12	2.81333394254582e-17	3.85146077474716e-17
2008006	13	2.62731112554558e-17	3.67315647271743e-17
2008006	14	2.56313657009359e-17	3.66042924320049e-17
2008006	15	2.61014886061715e-17	3.7720796361764e-17
2008006	16	2.67137333193085e-17	3.91702729492564e-17
2008006	17	2.76132547488309e-17	4.10806481782801e-17
2008006	18	2.92209011662433e-17	4.43316643333901e-17
2008006	19	3.1824660066957e-17	4.90466477876612e-17
2008006	20	3.44716208880315e-17	5.41171022177044e-17
2008006	21	3.62318702866764e-17	5.74990797308938e-17
2008006	22	3.68954499132221e-17	5.88350283962693e-17
2008006	23	3.67369970552542e-17	5.87169388238789e-17
2008007	0	3.63927695719113e-17	5.81177353871247e-17
2008007	1	3.6211610448608e-17	5.78351587501787e-17
2008007	2	3.6249390588863e-17	5.81206601390181e-17
2008007	3	3.74668943596844e-17	5.83045555292387e-17
2008007	4	3.86396639147584e-17	5.75369595001767e-17
2008007	5	3.91859506741131e-17	5.78379284641015e-17
2008007	6	4.17391708601489e-17	6.0866844434653e-17
2008007	7	4.93364671286327e-17	6.83266496100935e-17
2008007	8	5.90165970612306e-17	7.75317390863051e-17
2008007	9	6.85091887881133e-17	9.15655586863843e-17
2008007	10	7.00548780540475e-17	9.27861017914544e-17
2008007	11	7.45005987822149e-17	9.62251499132101e-17
2008007	12	7.03901843313849e-17	8.42103986097245e-17
2008007	13	7.01860008734631e-17	8.31597724892896e-17
2008007	14	8.74109806250668e-17	1.05977408854143e-16
2008007	15	1.23827530267948e-16	1.68381096701784e-16
2008007	16	1.08000083800152e-16	1.2565134736859e-16
2008007	17	9.81695819960823e-17	1.11711410353088e-16
2008007	18	9.3299125759151e-17	1.0344136467804e-16
2008007	19	8.33325109907151e-17	9.18508149007842e-17
2008007	20	8.2048160270781e-17	9.09049691298116e-17
2008007	21	8.59848338792286e-17	9.55081735768887e-17
2008007	22	9.03171264456234e-17	1.00540002292384e-16
2008007	23	9.33122379701967e-17	1.04632862823961e-16
2008008	0	9.7893497993185e-17	1.1342062300957e-16
2008008	1	1.07931492322511e-16	1.31164890363853e-16
2008008	2	1.16130247758201e-16	1.46031157530834e-16
2008008	3	1.23451075319525e-16	1.60305479392542e-16
2008008	4	9.01673024477352e-17	1.09635574708569e-16
2008008	5	7.40707494126824e-17	8.55773219803314e-17
2008008	6	7.32623694620378e-17	8.32351613362194e-17
2008008	7	7.64704341997138e-17	8.72824385403558e-17
2008008	8	8.03291545425506e-17	9.26025973072417e-17
2008008	9	8.52820833013719e-17	9.693630020739e-17
2008008	10	8.89341474521824e-17	9.88038505291104e-17
2008008	11	8.94411320803796e-17	9.80004959790602e-17
2008008	12	9.01153435649963e-17	9.70939719622921e-17
2008008	13	8.95468963598722e-17	9.70717971171751e-17
2008008	14	8.85871781931961e-17	9.65332938099272e-17
2008008	15	8.70530391650592e-17	9.53214088559823e-17
2008008	16	8.47729499387952e-17	9.34900801743749e-17
2008008	17	8.08207334486654e-17	9.03653957279681e-17
2008008	18	7.4315670541356e-17	8.55596686032999e-17
2008008	19	6.93427593163037e-17	7.9883204842372e-17
2008008	20	6.42113601566967e-17	7.57341599812417e-17
2008008	21	6.14403421069481e-17	7.33082175523633e-17
2008008	22	6.0934501654427e-17	7.24518895503088e-17
2008008	23	6.07689241385742e-17	7.33877011502254e-17
2008009	0	6.20571145775453e-17	7.54421193356502e-17
2008009	1	6.36786709111236e-17	7.83052646082761e-17
2008009	2	6.58507210807236e-17	8.09185253329808e-17
2008009	3	6.77343903349476e-17	8.34108824205077e-17
2008009	4	7.13807020600658e-17	8.8076408940349e-17
2008009	5	7.70758079842974e-17	9.54006660703345e-17
2008009	6	8.14248782381071e-17	9.86511341033099e-17
2008009	7	8.4574537566842e-17	9.94112221752064e-17
2008009	8	8.53447252336397e-17	9.99439954515455e-17
2008009	9	8.46864137249838e-17	9.78381361038246e-17
2008009	10	8.17939304535452e-17	9.55040315393894e-17
2008009	11	7.77537703182556e-17	9.06427953630798e-17
2008009	12	7.24782968083558e-17	8.38578911747704e-17
2008009	13	6.7114097302424e-17	7.80643518078581e-17
2008009	14	6.30989771779781e-17	7.40811759107486e-17
2008009	15	6.09152301381449e-17	7.15994341823886e-17
2008009	16	5.90550925984332e-17	6.95768898847752e-17
2008009	17	5.65582632873944e-17	6.63569367516348e-17
2008009	18	5.18533709693094e-17	6.1540884147299e-17
2008009	19	4.59950726701926e-17	5.56669869003523e-17
2008009	20	4.16433238855508e-17	5.13946545032352e-17
2008009	21	3.81244559958309e-17	4.84199973242084e-17
2008009	22	3.55158776539143e-17	4.62511772079607e-17
2008009	23	3.37264279890114e-17	4.4486486814134e-17
2008010	0	3.2275420452635e-17	4.29624571908821e-17
2008010	1	3.18209590990197e-17	4.18162157826774e-17
2008010	2	3.12693368729935e-17	4.09036852174396e-17
2008010	3	3.0078298925402e-17	3.99234718885538e-17
2008010	4	2.96342459374822e-17	3.89258276795409e-17
2008010	5	2.81985279004556e-17	3.813988704598e-17
2008010	6	2.78924696214345e-17	3.77878279867218e-17
2008010	7	2.83271716928386e-17	3.81935184365677e-17
2008010	8	2.97250463099696e-17	3.98380226442692e-17
2008010	9	3.10864021756547e-17	4.19259601321838e-17
2008010	10	3.38222485572503e-17	4.58568899506242e-17
2008010	11	3.34422260118393e-17	4.32506854668393e-17
2008010	12	3.36513621555207e-17	4.30642837133677e-17
2008010	13	3.34667463924111e-17	4.185796460626e-17
2008010	14	3.26646778909956e-17	4.10721350569713e-17
2008010	15	3.32893440092217e-17	4.23848150436432e-17
2008010	16	3.52115379463575e-17	4.44585688942575e-17
2008010	17	3.69561002954974e-17	4.58389409549709e-17
2008010	18	3.82924348088534e-17	4.72153883991728e-17
2008010	19	3.92754639268569e-17	4.88048710507903e-17
2008010	20	4.03145565073588e-17	4.97172994041588e-17
2008010	21	4.05112791086627e-17	4.94478401948361e-17
2008010	22	4.05409090184888e-17	4.90356371863833e-17
2008010	23	4.0880927625877e-17	4.96076190869339e-17
2008011	0	4.58985721434985e-17	5.72266108628906e-17
2008011	1	5.00224866417767e-17	6.23328323983091e-17
2008011	2	5.22707819022744e-17	6.42151566374216e-17
2008011	3	5.32660002743375e-17	6.46649035135871e-17
2008011	4	5.39572701764058e-17	6.53505245671057e-17
2008011	5	5.45118488225844e-17	6.56442690540359e-17
2008011	6	5.43188684667061e-17	6.44681551527356e-17
2008011	7	5.39440664315891e-17	6.24962776802641e-17
2008011	8	5.35459450254293e-17	6.06062636683157e-17
2008011	9	5.35569010284906e-17	5.96519445838364e-17
2008011	10	5.41165069086004e-17	6.02037872738737e-17
2008011	11	5.53918061077358e-17	6.14553681063847e-17
2008011	12	5.60186125079895e-17	6.2276441707145e-17
2008011	13	5.70584755430184e-17	6.38053590348247e-17
2008011	14	5.9599800051269e-17	6.73479590858942e-17
2008011	15	6.18467985135611e-17	6.99782590034373e-17
2008011	16	6.19674067682698e-17	7.02786524222995e-17
2008011	17	6.07595941953201e-17	6.95453821443089e-17
2008011	18	5.81523257740275e-17	6.85789491814227e-17
2008011	19	5.70661593645489e-17	6.83774521205702e-17
2008011	20	5.84106492445115e-17	7.06613681064795e-17
2008011	21	6.02422637544347e-17	7.31652050580934e-17
2008011	22	6.08985760192731e-17	7.44140801869278e-17
2008011	23	5.99511327791746e-17	7.40820845858266e-17
2008012	0	5.89982946180962e-17	7.29146082620447e-17
2008012	1	5.89385511008142e-17	7.16364678935351e-17
2008012	2	5.7825619523118e-17	7.00060683035594e-17
2008012	3	5.64476230007531e-17	6.85211341942305e-17
2008012	4	5.49361528390029e-17	6.66441304448559e-17
2008012	5	5.29953018032996e-17	6.42640384649863e-17
2008012	6	5.00965403256044e-17	6.14351122472489e-17
2008012	7	4.55332241144039e-17	5.68635952254236e-17
2008012	8	4.37013423139836e-17	5.50373157391126e-17
2008012	9	5.3282382505132e-17	6.84791916686612e-17
2008012	10	6.56415913717837e-17	8.05072288532332e-17
2008012	11	7.5647579013457e-17	8.66342094536127e-17
2008012	12	8.3213965965869e-17	9.29164402896283e-17
2008012	13	8.81194835708464e-17	9.74869380518526e-17
2008012	14	9.11152830261914e-17	1.00729433010198e-16
2008012	15	9.18993859581139e-17	1.01951286059736e-16
2008012	16	9.07248986493043e-17	1.00238138138979e-16
2008012	17	8.84333296224393e-17	9.7735747855593e-17
2008012	18	8.63779363429885e-17	9.61367665759184e-17
2008012	19	8.43955340798881e-17	9.53139885349619e-17
2008012	20	8.28790692654511e-17	9.44718464973317e-17
2008012	21	8.11832862089035e-17	9.38373279656794e-17
2008012	22	7.83439658418738e-17	9.31710669923501e-17
2008012	23	7.55047254961838e-17	9.17264158410297e-17
2008013	0	7.47695928458277e-17	9.11503785084179e-17
2008013	1	7.31352468638562e-17	9.06340325412679e-17
2008013	2	7.27113734240395e-17	9.01346515210815e-17
2008013	3	7.26795828658002e-17	8.9741095409669e-17
2008013	4	7.26400562676246e-17	9.03319501136367e-17
2008013	5	7.28588580612245e-17	9.05108527565044e-17
2008013	6	7.37444395036951e-17	9.13658826452892e-17
2008013	7	7.39384378405355e-17	9.17805105527064e-17
2008013	8	7.41045093497057e-17	9.17902890021496e-17
2008013	9	7.47119247088597e-17	9.17713120026455e-17
2008013	10	7.44459370384069e-17	9.16472976357584e-17
2008013	11	7.44454166238904e-17	9.07331905799018e-17
2008013	12	7.45803991910421e-17	9.26520376568551e-17
2008013	13	7.33390868335698e-17	9.16510658813956e-17
2008013	14	7.26295332475651e-17	9.14237863488674e-17
2008013	15	7.33987471024401e-17	9.13224666126839e-17
2008013	16	7.45542321399525e-17	9.12730845274875e-17
2008013	17	7.45226316970931e-17	9.1173881171251e-17
2008013	18	7.40907003281293e-17	9.00213957802681e-17
2008013	19	7.25917530673944e-17	8.90936232431515e-17
2008013	20	7.27805751463865e-17	8.82110206257496e-17
2008013	21	7.00154979655817e-17	8.61635053360455e-17
2008013	22	6.52555373529151e-17	8.18054317177734e-17
2008013	23	5.94516573977218e-17	7.73352144438092e-17
2008014	0	5.70181985548103e-17	7.3411980135513e-17
2008014	1	5.47794809878232e-17	7.00189827374033e-17
2008014	2	5.32347224479102e-17	6.72702744487338e-17
2008014	3	5.19889175638851e-17	6.54128863114903e-17
2008014	4	5.12527080307978e-17	6.4468734213419e-17
2008014	5	5.19524289179587e-17	6.4307273482956e-17
2008014	6	5.22926272532863e-17	6.4674912395966e-17
2008014	7	5.30424980501269e-17	6.52610102178873e-17
2008014	8	5.39089277090036e-17	6.56257250045478e-17
2008014	9	5.55409898999794e-17	6.63185590953419e-17
2008014	10	6.38011169337454e-17	7.632340470246e-17
2008014	11	6.76244495084097e-17	8.00017873460233e-17
2008014	12	6.89421943976129e-17	8.0548518720979e-17
2008014	13	6.72034954233963e-17	7.77240387456201e-17
2008014	14	6.47378202271544e-17	7.42998808429066e-17
2008014	15	6.24190699969941e-17	7.18138211236578e-17
2008014	16	6.08191842785435e-17	7.04915369890094e-17
2008014	17	5.96313555063031e-17	6.97443761187593e-17
2008014	18	5.91131813223522e-17	6.92888902524342e-17
2008014	19	5.90185914908387e-17	6.91547868048088e-17
2008014	20	5.93087283345019e-17	6.93386710107348e-17
2008014	21	5.98689715282732e-17	6.99901073798107e-17
2008014	22	6.06652534246177e-17	7.0969886828567e-17
2008014	23	6.1518643102482e-17	7.22772045053188e-17
2008015	0	6.25089083657665e-17	7.37504157604065e-17
2008015	1	6.35696676283596e-17	7.54574938206811e-17
2008015	2	6.4916944487788e-17	7.70133955710658e-17
2008015	3	6.62689793665725e-17	7.81000783796301e-17
2008015	4	6.63398527979927e-17	7.72787619575297e-17
2008015	5	6.47707842217245e-17	7.46817803644723e-17
2008015	6	6.25766119114071e-17	7.17558649484773e-17
2008015	7	6.03035762868705e-17	6.91871278045215e-17
2008015	8	5.9060769476453e-17	6.72706268422228e-17
2008015	9	5.83452987454727e-17	6.61123397777161e-17
2008015	10	5.79550058504934e-17	6.53299438160309e-17
2008015	11	5.73624612002223e-17	6.47898432428449e-17
2008015	12	5.72731801157489e-17	6.54740866341771e-17
2008015	13	5.86790311698092e-17	6.78565099154415e-17
2008015	14	6.11170539008375e-17	7.09755065957619e-17
2008015	15	6.32714425281751e-17	7.36244442388583e-17
2008015	16	6.50804630201851e-17	7.55167413272179e-17
2008015	17	6.61146981689941e-17	7.69568068846835e-17
2008015	18	6.73380357201274e-17	7.80958610304558e-17
2008015	19	6.94684905232686e-17	8.09093677613648e-17
2008015	20	7.11737556076459e-17	8.32891802212787e-17
2008015	21	7.13684505000755e-17	8.34888833929292e-17
2008015	22	7.08069324190497e-17	8.25026484099876e-17
2008015	23	7.01468743868143e-17	8.20937450660938e-17
2008016	0	7.00661189871947e-17	8.21385326785539e-17
2008016	1	7.01551631705652e-17	8.25170390480008e-17
2008016	2	6.94044404721902e-17	8.15235841985093e-17
2008016	3	6.76999773668975e-17	7.92440625562885e-17
2008016	4	6.41588430556915e-17	7.41004155632001e-17
2008016	5	5.80317922834451e-17	6.47298000863152e-17
2008016	6	4.97753940765591e-17	5.32814745760474e-17
2008016	7	4.33076177508528e-17	4.54787234135663e-17
2008016	8	4.08120383802351e-17	4.26371463291591e-17
2008016	9	4.00888257148304e-17	4.20361553702873e-17
2008016	10	4.09511309964858e-17	4.34246268385894e-17
2008016	11	4.44351774378211e-17	4.81480321102469e-17
2008016	12	5.17319400482627e-17	5.8482895368099e-17
2008016	13	6.20304525894376e-17	7.21362286360585e-17
2008016	14	6.80743382507279e-17	8.02459703861924e-17
2008016	15	6.93004637599978e-17	8.21951341567543e-17
2008016	16	6.7853279010382e-17	8.0159324017953e-17
2008016	17	6.56753717192987e-17	7.77284231479629e-17
2008016	18	6.34870776195109e-17	7.53342730853164e-17
2008016	19	6.04894549919675e-17	7.2047356958308e-17
2008016	20	5.68909382198785e-17	6.90866159374712e-17
2008016	21	5.55035551611305e-17	6.62980863284501e-17
2008016	22	5.40056440685e-17	6.43157842237344e-17
2008016	23	5.11531308537318e-17	6.19269013121766e-17
2008017	0	4.83312114545084e-17	5.98036792000541e-17
2008017	1	4.70416584965011e-17	5.9177171691549e-17
2008017	2	4.59209259152219e-17	5.94251242587869e-17
2008017	3	4.539572940946e-17	5.99357463648204e-17
2008017	4	4.56488745010509e-17	6.03853961727014e-17
2008017	5	4.56787807380298e-17	6.08027989535279e-17
2008017	6	4.49462805908923e-17	6.14485193323025e-17
2008017	7	4.53158331156016e-17	6.22560693857724e-17
2008017	8	4.71274949795268e-17	6.32818672529474e-17
2008017	9	5.06750661819912e-17	6.77516096680888e-17
2008017	10	5.35887058364476e-17	6.88142117568442e-17
2008017	11	5.42511986604556e-17	6.73986306530555e-17
2008017	12	5.19390671026811e-17	6.22514542761016e-17
2008017	13	4.93272063450792e-17	5.6857284375263e-17
2008017	14	5.0697976197844e-17	5.66307989945649e-17
2008017	15	5.54028731468966e-17	6.11256427995283e-17
2008017	16	5.87794914276069e-17	6.61633803056051e-17
2008017	17	6.05802341527585e-17	6.82372651299235e-17
2008017	18	6.0408222807138e-17	6.85099054658741e-17
2008017	19	5.94101559820373e-17	6.82029602600231e-17
2008017	20	5.86900782393072e-17	6.73047607731339e-17
2008017	21	5.81229379688503e-17	6.75452310645726e-17
2008017	22	5.87868095701844e-17	6.70974442876734e-17
2008017	23	5.09958378400266e-17	5.68330371598368e-17
2008018	0	4.91684873636952e-17	5.323278855431e-17
2008018	1	4.37074137391912e-17	4.62582196282893e-17
2008018	2	3.70374724377664e-17	3.89201055508942e-17
2008018	3	3.22215999566725e-17	3.38202134458332e-17
2008018	4	3.08700664877679e-17	3.32014309156459e-17
2008018	5	3.92622671881062e-17	4.47469584006295e-17
2008018	6	6.16957527061316e-17	7.50242925538427e-17
2008018	7	7.51757474579447e-17	8.96441236155627e-17
2008018	8	6.65743946110086e-17	7.46495875742348e-17
2008018	9	6.77495576799245e-17	7.50256158172941e-17
2008018	10	9.00360360028028e-17	1.09756017946173e-16
2008018	11	1.22571474440923e-16	1.68360986480351e-16
2008018	12	1.02918456504516e-16	1.3380210875078e-16
2008018	13	7.16797289496638e-17	8.4102441370715e-17
2008018	14	6.01700020342039e-17	6.85185306396751e-17
2008018	15	5.8834821123484e-17	6.6811189558014e-17
2008018	16	6.00894555601757e-17	6.8133453456362e-17
2008018	17	6.15019810223476e-17	6.84860565101862e-17
2008018	18	6.27912365418003e-17	6.9395451869087e-17
2008018	19	6.52671649766778e-17	7.23503810002001e-17
2008018	20	6.6903359601873e-17	7.42620807726613e-17
2008018	21	6.7336098373651e-17	7.43430169897116e-17
2008018	22	6.65634390294938e-17	7.25118603517874e-17
2008018	23	6.04363448325227e-17	6.50730833714519e-17
2008019	0	4.93789165110154e-17	5.2375274216716e-17
2008019	1	4.2521859469902e-17	4.54269853290074e-17
2008019	2	4.51364111701019e-17	4.93856094218467e-17
2008019	3	5.12730696814302e-17	5.68823277909698e-17
2008019	4	5.57304403635032e-17	6.25866573945743e-17
2008019	5	5.60645920227014e-17	6.35139955875783e-17
2008019	6	6.61201931013923e-17	7.69777049735424e-17
2008019	7	8.39282258744757e-17	9.8249707055582e-17
2008019	8	8.25296256489797e-17	9.32912953062577e-17
2008019	9	6.61881434446781e-17	7.27621647995214e-17
2008019	10	5.26389037217416e-17	5.65481531158088e-17
2008019	11	4.51390361175144e-17	4.82597948862749e-17
2008019	12	3.98166253290168e-17	4.26853835583737e-17
2008019	13	3.42566106253162e-17	3.6751977412899e-17
2008019	14	2.85209763459192e-17	3.06308664221071e-17
2008019	15	2.2404751633407e-17	2.34306323670806e-17
2008019	16	2.02563946722601e-17	2.13213213212229e-17
2008019	17	2.45443581590462e-17	2.65388777285433e-17
2008019	18	3.05027306007985e-17	3.39362279265303e-17
2008019	19	3.54572702014501e-17	3.99720139650567e-17
2008019	20	3.82607133220267e-17	4.31809975679572e-17
2008019	21	3.95275421275074e-17	4.46151975069051e-17
2008019	22	4.01961652994063e-17	4.54838239683987e-17
2008019	23	4.06431923934063e-17	4.6050241389231e-17
2008020	0	4.06733462222426e-17	4.65334410885785e-17
2008020	1	4.06017320956557e-17	4.63259771743043e-17
2008020	2	3.95110370314267e-17	4.55953478975741e-17
2008020	3	3.78340414655245e-17	4.48539248174054e-17
2008020	4	3.60507166668135e-17	4.41172531624787e-17
2008020	5	3.38625551537594e-17	4.21398128154043e-17
2008020	6	2.53139698763138e-17	3.00255561239916e-17
2008020	7	2.22152306417263e-17	2.65520238695715e-17
2008020	8	2.34907449097328e-17	2.64298129519293e-17
2008020	9	1.8554861165441e-17	1.9844080916685e-17
2008020	10	1.99576742973103e-17	2.09994928225878e-17
2008020	11	2.65830862788447e-17	2.87542326794114e-17
2008020	12	3.89432332406398e-17	4.23220542122576e-17
2008020	13	4.91384103539066e-17	5.27033462183471e-17
2008020	14	4.72484603240915e-17	5.18468419696439e-17
2008020	15	4.68537425295253e-17	5.32271980943794e-17
2008020	16	1.20096240828826e-16	1.66930203223313e-16
2008020	17	1.21566548369972e-16	1.69858907651513e-16
2008020	18	1.17367397796247e-16	1.68661097900815e-16
2008020	19	9.05383251473971e-17	1.21406063072991e-16
2008020	20	3.51353913191444e-17	4.2886207934131e-17
2008020	21	2.45803500220766e-17	2.91141705015753e-17
2008020	22	2.96060011704077e-17	3.63169732741081e-17
2008020	23	5.09631319841519e-17	6.1812837838101e-17
2008021	0	7.08258863507846e-17	8.86856891797369e-17
2008021	1	8.32433195749514e-17	1.00259177517524e-16
2008021	2	1.20501456098872e-16	1.68663445783952e-16
2008021	3	7.07315460119059e-17	8.62484023861356e-17
2008021	4	5.89339646922059e-17	6.82482753322634e-17
2008021	5	5.13235204964656e-17	5.92607178257598e-17
2008021	6	5.29936494768279e-17	6.40315663006155e-17
2008021	7	1.16332737666068e-16	1.6735249616141e-16
2008021	8	1.21900653416047e-16	1.68130817446282e-16
2008021	9	1.14169312335726e-16	1.47583653058697e-16
2008021	10	9.57948159969091e-17	1.18133747791785e-16
2008021	11	1.23878440900342e-16	1.67803862900752e-16
2008021	12	9.73420851554205e-17	1.18507452715538e-16
2008021	13	8.08137925474099e-17	9.50576939064281e-17
2008021	14	5.79566137461866e-17	6.66163655489202e-17
2008021	15	3.55447237270943e-17	3.88982770758592e-17
2008021	16	2.90464804425477e-17	3.19002541806648e-17
2008021	17	2.54536413264178e-17	2.80087674788926e-17
2008021	18	2.09023397318008e-17	2.27224391200132e-17
2008021	19	2.51238705923596e-17	2.76853868212629e-17
2008021	20	2.53326428226508e-17	2.75646937573221e-17
2008021	21	2.5157550215534e-17	2.71551518058468e-17
2008021	22	2.23023585945305e-17	2.37082396272777e-17
2008021	23	1.51762104653859e-17	1.5817229610753e-17
2008022	0	1.24947025230068e-17	1.27917553755751e-17
2008022	1	1.57832504890064e-17	1.61382499007894e-17
2008022	2	2.42784250329597e-17	2.53098135056384e-17
2008022	3	3.3259824908137e-17	3.52309642075188e-17
2008022	4	3.12464696233987e-17	3.59894372048469e-17
2008022	5	2.62632614873163e-17	2.71656884348472e-17
2008022	6	2.23936168371978e-17	2.5120557483601e-17
2008022	7	3.61583570348725e-17	4.38798381150758e-17
2008022	8	5.05392314932101e-17	6.05271216543123e-17
2008022	9	6.66288454021545e-17	7.73098515935006e-17
2008022	10	7.82472368971488e-17	8.89091981004655e-17
2008022	11	8.15117108232682e-17	9.21499053351564e-17
2008022	12	8.1389417668261e-17	9.1884818570065e-17
2008022	13	8.03862949183391e-17	9.10303619894126e-17
2008022	14	7.92142093067047e-17	9.01938890333191e-17
2008022	15	7.67238505366914e-17	8.83760604746915e-17
2008022	16	7.5183217026898e-17	8.70632364669348e-17
2008022	17	7.41543818642431e-17	8.70397449766374e-17
2008022	18	7.34986726266968e-17	8.89624342039799e-17
2008022	19	7.28767531510842e-17	9.35052831848664e-17
2008022	20	7.54658112452565e-17	1.00582169406198e-16
2008022	21	7.88570517178165e-17	1.07049678085393e-16
2008022	22	8.31642732387372e-17	1.15181484191246e-16
2008022	23	8.7750836724947e-17	1.22312957777786e-16
2008023	0	8.77182747471026e-17	1.24786560326586e-16
2008023	1	8.11243592327011e-17	1.20209470904556e-16
2008023	2	7.49309899658036e-17	1.1119167101967e-16
2008023	3	7.03944278577683e-17	1.0311184731675e-16
2008023	4	6.76016230409587e-17	9.74691964020948e-17
2008023	5	6.99359451626458e-17	9.40132598704611e-17
2008023	6	7.41949374086036e-17	9.15753573267114e-17
2008023	7	7.76238911677947e-17	9.44667692627671e-17
2008023	8	7.54211946233711e-17	9.11680981306001e-17
2008023	9	7.39891779387908e-17	8.67465737373991e-17
2008023	10	7.35745783778218e-17	8.28204257632075e-17
2008023	11	7.06955253868693e-17	7.83712347279539e-17
2008023	12	6.69067280682396e-17	7.54143308860827e-17
2008023	13	6.16985124801786e-17	7.0116286714235e-17
2008023	14	5.65186255845879e-17	6.46635999891517e-17
2008023	15	5.19022446235178e-17	5.95509510196591e-17
2008023	16	4.77635254463182e-17	5.40992212161361e-17
2008023	17	4.56383975595055e-17	5.09518837198494e-17
2008023	18	4.37394860739864e-17	4.93179205752786e-17
2008023	19	4.21815605659643e-17	4.74251315601603e-17
2008023	20	4.00221746838284e-17	4.4433661574867e-17
2008023	21	3.00217704575652e-17	3.27075761388379e-17
2008023	22	2.22187951140337e-17	2.35860371814967e-17
2008023	23	2.39363431623275e-17	2.58512541622874e-17
2008024	0	3.02982270889723e-17	3.34583280671734e-17
2008024	1	3.56840496750769e-17	4.07955784779401e-17
2008024	2	3.88383772243439e-17	4.60313710662245e-17
2008024	3	4.11954110336769e-17	4.92398262268405e-17
2008024	4	4.22653495015744e-17	5.16914189056747e-17
2008024	5	4.31944410660993e-17	5.36544077196743e-17
2008024	6	4.31792595540401e-17	5.48009032947422e-17
2008024	7	4.31461925990417e-17	5.53149959891327e-17
2008024	8	4.29791428430014e-17	5.459945452647e-17
2008024	9	4.33626529188646e-17	5.3468415441541e-17
2008024	10	4.29551262057084e-17	5.13996532408455e-17
2008024	11	4.26033793503391e-17	5.03132144950494e-17
2008024	12	4.25219022335462e-17	4.98543970388777e-17
2008024	13	4.24073002380361e-17	5.00575175932194e-17
2008024	14	4.17106160616802e-17	5.08408451937243e-17
2008024	15	4.03601381700216e-17	5.01637814660741e-17
2008024	16	3.46711272568647e-17	4.32692639929103e-17
2008024	17	2.71262339394713e-17	3.2609216674223e-17
2008024	18	3.45151960982743e-17	3.87059697896654e-17
2008024	19	5.1684187333883e-17	5.81863529154278e-17
2008024	20	6.69441129635632e-17	7.47394478221114e-17
2008024	21	7.78121357756191e-17	8.7111324251528e-17
2008024	22	8.14162029871198e-17	9.61193614506676e-17
2008024	23	8.03601243217335e-17	9.73717201521004e-17
2008025	0	7.78212687712624e-17	9.79899677615858e-17
2008025	1	7.90811943271297e-17	1.00338256376567e-16
2008025	2	7.98215492458077e-17	9.8792483893968e-17
2008025	3	7.918474584706e-17	9.67163993357771e-17
2008025	4	7.66312904923455e-17	9.19346931395479e-17
2008025	5	7.4457101216985e-17	9.03650515105395e-17
2008025	6	7.28081524595875e-17	9.28704709948675e-17
2008025	7	8.09824429510953e-17	1.00802384531936e-16
2008025	8	8.56388962835605e-17	1.03283971683684e-16
2008025	9	9.2975458805536e-17	1.05464853481884e-16
2008025	10	9.70620437730567e-17	1.0713128622191e-16
2008025	11	9.65239965152259e-17	1.06309095428896e-16
2008025	12	9.27679993761714e-17	1.03383524092076e-16
2008025	13	8.60750726142293e-17	9.53499759976608e-17
2008025	14	7.80082002570475e-17	8.55878074832324e-17
2008025	15	6.98799773574912e-17	7.60534378511601e-17
2008025	16	6.4496555596856e-17	6.97982292724995e-17
2008025	17	6.0713545687109e-17	6.56058573218286e-17
2008025	18	5.70010783915163e-17	6.16505810468151e-17
2008025	19	5.25190698893652e-17	5.68525904042898e-17
2008025	20	4.71975395400969e-17	5.1003903465059e-17
2008025	21	4.08840694592945e-17	4.40078406340167e-17
2008025	22	3.32851058040149e-17	3.55836888783363e-17
2008025	23	2.69078051863337e-17	2.84510417586744e-17
2008026	0	2.21290790552083e-17	2.32720737320838e-17
2008026	1	1.89004314709205e-17	1.99315500358889e-17
2008026	2	1.72832748633526e-17	1.81949584741384e-17
2008026	3	1.55576369144742e-17	1.63674737351011e-17
2008026	4	1.34113933062991e-17	1.40742794905502e-17
2008026	5	1.18848633115806e-17	1.25101808224192e-17
2008026	6	1.12933634160181e-17	1.1920109338323e-17
2008026	7	1.08509332298865e-17	1.14420825988457e-17
2008026	8	9.92922914961815e-18	1.04738773224732e-17
2008026	9	8.83331528888826e-18	9.23199594308629e-18
2008026	10	7.99683416558732e-18	8.3229710455464e-18
2008026	11	7.73199284207226e-18	8.05412611901835e-18
2008026	12	8.04259121119699e-18	8.55197101159861e-18
2008026	13	9.20415116017487e-18	9.9836683480006e-18
2008026	14	1.17332076280608e-17	1.29554190312794e-17
2008026	15	1.88297403999941e-17	2.13875037459439e-17
2008026	16	3.37057643553518e-17	3.90929104196001e-17
2008026	17	4.74983561233837e-17	5.54218683955333e-17
2008026	18	5.51412961229093e-17	6.47116637182433e-17
2008026	19	5.7266399562705e-17	6.80028675526065e-17
2008026	20	5.63115802934994e-17	6.61456817770942e-17
2008026	21	5.47106054012592e-17	6.2558357967681e-17
2008026	22	5.26982259637488e-17	5.8606724150187e-17
2008026	23	4.84527090070132e-17	5.40817580006085e-17
2008027	0	4.87156491890824e-17	5.46946244404023e-17
2008027	1	4.99351289634851e-17	5.56247445447336e-17
2008027	2	4.79582788573009e-17	5.32758646840212e-17
2008027	3	4.36243403658993e-17	4.82926297900027e-17
2008027	4	3.71080276415532e-17	4.14769328492412e-17
2008027	5	2.7025891622257e-17	2.94344763127739e-17
2008027	6	1.83070425436253e-17	1.94069887159338e-17
2008027	7	1.30061423567745e-17	1.37027783290002e-17
2008027	8	1.06439523270056e-17	1.1030745927291e-17
2008027	9	9.3739943266702e-18	9.68414631079341e-18
2008027	10	8.6943371362674e-18	8.97127027225474e-18
2008027	11	8.40634175516149e-18	8.73079861916194e-18
2008027	12	8.75893611144201e-18	9.28210586420108e-18
2008027	13	9.1940004586002e-18	9.62823001123231e-18
2008027	14	9.17830778465802e-18	9.64339980055646e-18
2008027	15	9.56330813091379e-18	1.03526129305865e-17
2008027	16	1.04649767035163e-17	1.1794339762492e-17
2008027	17	1.19886714732798e-17	1.39719085458382e-17
2008027	18	1.42239932421454e-17	1.67957154033519e-17
2008027	19	1.6679655465721e-17	1.98297368503179e-17
2008027	20	1.88016505870411e-17	2.22073341391065e-17
2008027	21	2.00232509245444e-17	2.35043909040079e-17
2008027	22	1.98127224662605e-17	2.3340092569193e-17
2008027	23	1.93125161650999e-17	2.28789320468317e-17
2008028	0	1.9042464985393e-17	2.27635820090038e-17
2008028	1	1.81603808617952e-17	2.18771192931698e-17
2008028	2	1.6390352196244e-17	2.03357960749056e-17
2008028	3	1.49731985866281e-17	1.87238957029103e-17
2008028	4	1.36055757961123e-17	1.73579479149867e-17
2008028	5	1.20136803677331e-17	1.59986906112927e-17
2008028	6	1.06167433595728e-17	1.45800351734426e-17
2008028	7	9.54658141394271e-18	1.31425708582056e-17
2008028	8	8.69476268792689e-18	1.18331313052425e-17
2008028	9	7.72166320333122e-18	1.02233440776597e-17
2008028	10	6.38790581707201e-18	8.28033191341093e-18
2008028	11	4.92125346826954e-18	6.28063518454932e-18
2008028	12	3.54507408576852e-18	4.35601403529806e-18
2008028	13	2.41403049716458e-18	2.8598928141989e-18
2008028	14	1.81800235590751e-18	2.11935221411286e-18
2008028	15	1.57142961146836e-18	1.88641139741457e-18
2008028	16	1.52443664512086e-18	1.90614641382677e-18
2008028	17	1.58068706926099e-18	2.04739176296788e-18
2008028	18	1.75991641346482e-18	2.36805784706965e-18
2008028	19	2.33585628680515e-18	2.89109976323608e-18
2008028	20	3.4502065383158e-18	4.20763908287796e-18
2008028	21	4.19245265827798e-18	5.14629775248247e-18
2008028	22	4.90644032628055e-18	6.03082680432783e-18
2008028	23	5.90975538581565e-18	7.12644182441849e-18
2008029	0	7.30578345117557e-18	8.87601914212629e-18
2008029	1	8.04626362630739e-18	9.98970869647277e-18
2008029	2	7.86767938492337e-18	1.00831728156499e-17
2008029	3	7.34357576615156e-18	9.68792886556203e-18
2008029	4	6.97216879314473e-18	9.33407115885904e-18
2008029	5	6.55711387948203e-18	9.03227019742928e-18
2008029	6	6.42178289428818e-18	8.76512480680704e-18
2008029	7	6.33992787732592e-18	8.5506663663131e-18
2008029	8	6.23866050030525e-18	8.34367224495148e-18
2008029	9	7.18517202120506e-18	9.06625305447268e-18
2008029	10	9.9000501713889e-18	1.20299711668129e-17
2008029	11	1.33569234148073e-17	1.6062088551782e-17
2008029	12	1.39093521647085e-17	1.66717794206489e-17
2008029	13	1.34374997882843e-17	1.61300539823405e-17
2008029	14	1.25458115648676e-17	1.52895893134888e-17
2008029	15	1.16756346677557e-17	1.45723945227928e-17
2008029	16	1.09728707395225e-17	1.4001005048e-17
2008029	17	1.0533162006508e-17	1.34526026266535e-17
2008029	18	1.00722889168497e-17	1.29134257690627e-17
2008029	19	9.46242204493156e-18	1.24562023911818e-17
2008029	20	9.11498584019807e-18	1.21211275099892e-17
2008029	21	9.0314955075283e-18	1.19148096931058e-17
2008029	22	9.05440251656484e-18	1.17832755778426e-17
2008029	23	9.15156150636022e-18	1.17062208173635e-17
2008030	0	9.1734962838584e-18	1.15812384570504e-17
2008030	1	9.09481591668012e-18	1.13528382270541e-17
2008030	2	8.7468803210028e-18	1.10015873453937e-17
2008030	3	8.30946318855391e-18	1.0525863554341e-17
2008030	4	7.78305747250558e-18	9.97477358788337e-18
2008030	5	7.26224972244581e-18	9.40066495456228e-18
2008030	6	6.75302248801034e-18	8.83474065136183e-18
2008030	7	6.25525372501036e-18	8.28055084118421e-18
2008030	8	6.17134932490826e-18	7.82992802519232e-18
2008030	9	6.61410376000774e-18	8.45636799193806e-18
2008030	10	6.91596715074792e-18	8.5393931993775e-18
2008030	11	9.00449365322136e-18	1.11329998690315e-17
2008030	12	1.17624450385252e-17	1.44575678723534e-17
2008030	13	1.48197926561566e-17	1.81802749360656e-17
2008030	14	1.75153327864653e-17	2.11740595243567e-17
2008030	15	1.97603082876257e-17	2.36307899860166e-17
2008030	16	2.09848643681114e-17	2.50629741333626e-17
2008030	17	2.20699916407007e-17	2.67541612793142e-17
2008030	18	2.56071307595726e-17	3.19318847887315e-17
2008030	19	3.38903207306651e-17	4.18157701339167e-17
2008030	20	4.20727897187845e-17	5.14640752002119e-17
2008030	21	5.2914807141952e-17	5.97288314740511e-17
2008030	22	6.46571765725098e-17	6.99534402411445e-17
2008030	23	7.588166773299e-17	8.27224020806254e-17
2008031	0	8.32703306333999e-17	9.21043215386568e-17
2008031	1	8.69457570087752e-17	9.82807096608602e-17
2008031	2	8.86277339142135e-17	1.01964581692949e-16
2008031	3	8.82351189740778e-17	1.02660186371482e-16
2008031	4	8.79138323763282e-17	1.03818608757133e-16
2008031	5	8.72707355029409e-17	1.06064523619372e-16
2008031	6	8.70952557204479e-17	1.08167418900151e-16
2008031	7	8.55145717499465e-17	1.10246129394151e-16
2008031	8	8.69965980119239e-17	1.13192532877521e-16
2008031	9	8.88924870839216e-17	1.16025975906884e-16
2008031	10	8.98328357485976e-17	1.17820554595708e-16
2008031	11	9.21306610363036e-17	1.18354591418037e-16
2008031	12	9.38270965316732e-17	1.16606285454785e-16
2008031	13	9.16796079955171e-17	1.07987210221694e-16
2008031	14	8.7448258786261e-17	1.00742746398809e-16
2008031	15	8.32716991116548e-17	9.48376000536372e-17
2008031	16	7.87385234823648e-17	9.0278411536963e-17
2008031	17	7.42455668920078e-17	8.46927962210585e-17
2008031	18	6.96857625556328e-17	7.86699260563938e-17
2008031	19	6.51913493214809e-17	7.24444135026473e-17
2008031	20	6.01191441728165e-17	6.59103696520106e-17
2008031	21	5.48580912602704e-17	5.9363261430819e-17
2008031	22	5.06876186512393e-17	5.40683965710682e-17
2008031	23	4.76153818046358e-17	5.02910551200962e-17
2008032	0	4.37323449368068e-17	4.58105977182974e-17
2008032	1	3.84576165988693e-17	4.00672663834029e-17
2008032	2	3.29918841547842e-17	3.42383629354131e-17
2008032	3	2.83014029270612e-17	2.93646252341666e-17
2008032	4	2.43760411360588e-17	2.53150806025072e-17
2008032	5	2.1015869023677e-17	2.1833432627783e-17
2008032	6	1.82106985649764e-17	1.90421781502559e-17
2008032	7	1.62895272315317e-17	1.71346764433448e-17
2008032	8	1.5053276796914e-17	1.58093823364165e-17
2008032	9	1.43694458689934e-17	1.51334186130656e-17
2008032	10	1.45153375780833e-17	1.54084607947214e-17
2008032	11	1.55133229306415e-17	1.67452729960572e-17
2008032	12	1.70178669240906e-17	1.8660362805723e-17
2008032	13	1.80354545353865e-17	1.98309755984497e-17
2008032	14	2.03069610534893e-17	2.25647390648172e-17
2008032	15	2.53465901538238e-17	2.8691969572654e-17
2008032	16	3.01004284571426e-17	3.42816412032535e-17
2008032	17	3.40068237494664e-17	3.87322571972426e-17
2008032	18	3.85476168141256e-17	4.39381209523572e-17
2008032	19	4.42479902490668e-17	5.06300335859481e-17
2008032	20	4.98183429718243e-17	5.63766088145052e-17
2008032	21	5.65655913021762e-17	6.4174267400799e-17
2008032	22	6.43667147962054e-17	7.31104794902442e-17
2008032	23	7.10866512511554e-17	8.07678708342784e-17
2008033	0	7.61826937887665e-17	8.54483048000155e-17
2008033	1	8.0418148948e-17	8.8672084232388e-17
2008033	2	8.04903010972703e-17	8.77886218074796e-17
2008033	3	7.73263149100029e-17	8.27343819765422e-17
2008033	4	7.63481533648053e-17	8.13900847039295e-17
2008033	5	7.86054928898272e-17	8.56204322797017e-17
2008033	6	8.24367134986262e-17	9.16070887730216e-17
2008033	7	9.00678306912332e-17	1.03055461946273e-16
2008033	8	9.46261394138936e-17	1.08803476880879e-16
2008033	9	9.50537285288368e-17	1.09112931378757e-16
2008033	10	9.37438112700407e-17	1.07467102805471e-16
2008033	11	9.54113050770194e-17	1.16009704284484e-16
2008033	12	1.24729260609787e-16	1.67916749016617e-16
2008033	13	9.59581705671845e-17	1.29356721739884e-16
2008033	14	1.11661952087837e-16	1.49458098600058e-16
2008033	15	1.25776482599281e-16	1.67908673699215e-16
2008033	16	1.10925293249456e-16	1.49856699155784e-16
2008033	17	7.81099758450107e-17	1.05160964949855e-16
2008033	18	6.0480447763981e-17	7.46122297339584e-17
2008033	19	7.78529467460035e-17	8.9063046925728e-17
2008033	20	8.52193831103492e-17	9.45246515044412e-17
2008033	21	8.66027780850734e-17	9.48935825198242e-17
2008033	22	8.62460529639437e-17	9.3511055374577e-17
2008033	23	8.58742184074582e-17	9.27640604326719e-17
2008034	0	8.66130863300993e-17	9.26755970380585e-17
2008034	1	8.72257185014368e-17	9.31003935399418e-17
2008034	2	8.73581602295626e-17	9.32624471992225e-17
2008034	3	8.69167021752066e-17	9.28790240022099e-17
2008034	4	8.63651088451424e-17	9.28963099067738e-17
2008034	5	8.54928238108808e-17	9.2971826549315e-17
2008034	6	8.48689899378053e-17	9.3179711359114e-17
2008034	7	8.46545953697881e-17	9.35909853733645e-17
2008034	8	8.51431428030902e-17	9.39656357396591e-17
2008034	9	8.61591996962812e-17	9.50417209274018e-17
2008034	10	8.64901781240735e-17	9.48353072928825e-17
2008034	11	8.45288762286302e-17	9.21243752641771e-17
2008034	12	8.07959300572603e-17	8.75588506516107e-17
2008034	13	7.83339919510564e-17	8.42198476264663e-17
2008034	14	7.65586137841737e-17	8.23701705244939e-17
2008034	15	7.51386256490419e-17	8.08745896736809e-17
2008034	16	7.40416168852897e-17	7.95848441797133e-17
2008034	17	7.27737804099753e-17	7.78527644649192e-17
2008034	18	7.03963436437372e-17	7.56392193984204e-17
2008034	19	6.86365533424539e-17	7.34376547515598e-17
2008034	20	6.75231604940154e-17	7.19686060330388e-17
2008034	21	6.63761810519217e-17	7.05863546455683e-17
2008034	22	6.49193563097769e-17	6.92011506683943e-17
2008034	23	6.34159995688588e-17	6.78354597894919e-17
2008035	0	6.19462014936929e-17	6.65062832993127e-17
2008035	1	6.03437921657322e-17	6.52321921407296e-17
2008035	2	5.85440395416329e-17	6.40950954733669e-17
2008035	3	5.65689908809238e-17	6.32130871102415e-17
2008035	4	5.48419964845266e-17	6.25846079992272e-17
2008035	5	5.39269276356892e-17	6.22125391801446e-17
2008035	6	5.40692819938402e-17	6.20610132434105e-17
2008035	7	5.36904931926593e-17	6.2150504614654e-17
2008035	8	5.44215304843075e-17	6.25526225938428e-17
2008035	9	5.7789635538302e-17	6.71973350834657e-17
2008035	10	5.92518525798769e-17	6.89869773663547e-17
2008035	11	5.93613595875506e-17	6.90987885502386e-17
2008035	12	5.98116144385173e-17	6.85550266467496e-17
2008035	13	5.92717499644698e-17	6.74301102682535e-17
2008035	14	5.75989047791054e-17	6.63655112660674e-17
2008035	15	5.57440400810218e-17	6.48870612561176e-17
2008035	16	5.39568886939202e-17	6.29288689951334e-17
2008035	17	5.0932931569762e-17	6.0307970866993e-17
2008035	18	4.68294697514801e-17	5.63359640463748e-17
2008035	19	4.28131914658864e-17	5.37408599837624e-17
2008035	20	4.08721556748025e-17	5.18415551336096e-17
2008035	21	4.05106319067709e-17	5.04078894909996e-17
2008035	22	4.13329954440663e-17	5.05795174413158e-17
2008035	23	4.38615567309378e-17	5.33876496759612e-17
2008036	0	4.7939333518906e-17	5.78511170074775e-17
2008036	1	5.32827172563047e-17	6.29946355714921e-17
2008036	2	6.15176090689552e-17	6.88134761626744e-17
2008036	3	7.06141149590435e-17	7.75771648380947e-17
2008036	4	7.53239352650074e-17	8.3416235250358e-17
2008036	5	7.52190451251869e-17	8.33889769510729e-17
2008036	6	7.54863164159462e-17	8.40260659029977e-17
2008036	7	7.60718718398381e-17	8.49654237439112e-17
2008036	8	7.7559608112496e-17	8.79855525059051e-17
2008036	9	8.0627476119662e-17	9.06480612261359e-17
2008036	10	8.36890880894688e-17	9.31639429358572e-17
2008036	11	8.65029684962901e-17	9.77764370372648e-17
2008036	12	8.66986607522726e-17	9.67588836590684e-17
2008036	13	8.61113952416846e-17	9.55413795223403e-17
2008036	14	8.48028007107239e-17	9.43059964550747e-17
2008036	15	8.25198912922135e-17	9.24257148401836e-17
2008036	16	7.93937483656387e-17	8.88942685361525e-17
2008036	17	7.47411909182722e-17	8.24415570746497e-17
2008036	18	6.61242286976293e-17	7.11552885571714e-17
2008036	19	5.31214003857481e-17	5.65006455928318e-17
2008036	20	4.26049711588044e-17	4.55079684371926e-17
2008036	21	3.85812911305846e-17	4.15009886764008e-17
2008036	22	3.80124121120095e-17	4.14899248459966e-17
2008036	23	3.36872292089912e-17	3.70913996560149e-17
2008037	0	2.6651397122882e-17	2.83694743065633e-17
2008037	1	3.7436712103391e-17	4.13881642457943e-17
2008037	2	5.6406989029037e-17	6.57039891311857e-17
2008037	3	6.6529598468688e-17	7.96965475334806e-17
2008037	4	7.10392569510448e-17	8.72788711363476e-17
2008037	5	8.34727331000304e-17	1.04815205724897e-16
2008037	6	9.89630728544695e-17	1.2465714822869e-16
2008037	7	1.11277414758551e-16	1.45909272280323e-16
2008037	8	1.15478798480893e-16	1.5878393611916e-16
2008037	9	1.02023585950034e-16	1.25476363454738e-16
2008037	10	9.6069229621664e-17	1.20971199040953e-16
2008037	11	8.9310633729461e-17	1.06464106440056e-16
2008037	12	8.9787795882492e-17	1.07246824826715e-16
2008037	13	6.06397260157843e-17	6.88845491788908e-17
2008037	14	4.47842912609002e-17	4.89544544450871e-17
2008037	15	4.49205960839967e-17	4.92657454908148e-17
2008037	16	4.86744870190052e-17	5.46207971590827e-17
2008037	17	6.25781190052549e-17	7.29737977239719e-17
2008037	18	7.89171211841235e-17	9.45290542018584e-17
2008037	19	8.39583811421672e-17	1.02279807597036e-16
2008037	20	1.21226248499945e-16	1.68450654783197e-16
2008037	21	1.21485713458523e-16	1.68231968035276e-16
2008037	22	1.21439354514759e-16	1.68189254890724e-16
2008037	23	1.23030749938635e-16	1.69132322423354e-16
2008038	0	1.23226175419898e-16	1.68726708714327e-16
2008038	1	1.24277026664286e-16	1.68977437547698e-16
2008038	2	1.25199861134174e-16	1.68494366255205e-16
2008038	3	1.25124503397481e-16	1.67896743545645e-16
2008038	4	1.12193196425978e-16	1.50726398256034e-16
2008038	5	1.25278195237312e-16	1.68603864878191e-16
2008038	6	1.13067038963892e-16	1.43787026439825e-16
2008038	7	1.16351026957745e-16	1.46576468667234e-16
2008038	8	1.14148482930226e-16	1.38077067007073e-16
2008038	9	1.09569786639621e-16	1.26358246068655e-16
2008038	10	1.0452370591837e-16	1.18075521766638e-16
2008038	11	9.99603950955511e-17	1.11089775992067e-16
2008038	12	9.64050918943761e-17	1.06446026003623e-16
2008038	13	9.28327092741568e-17	1.02488453826459e-16
2008038	14	8.9738875227484e-17	9.90078787546879e-17
2008038	15	8.73549915915209e-17	9.63885917234727e-17
2008038	16	8.54905457882657e-17	9.40870824800744e-17
2008038	17	8.33138755166011e-17	9.19905214643321e-17
2008038	18	8.02015837891155e-17	9.04533250606219e-17
2008038	19	7.81401122449876e-17	8.97507098310781e-17
2008038	20	7.72408380152492e-17	8.96692011296705e-17
2008038	21	7.63671407023469e-17	8.94179515222904e-17
2008038	22	7.54946290550168e-17	9.00389814169357e-17
2008038	23	7.52767654531165e-17	9.07633423352514e-17
2008039	0	7.5382385602128e-17	9.13263173666905e-17
2008039	1	7.60834261330152e-17	9.16630661852495e-17
2008039	2	7.70789943910233e-17	9.16874158277814e-17
2008039	3	7.76044231900547e-17	9.13156108857237e-17
2008039	4	7.71865007537197e-17	9.04031440676237e-17
2008039	5	7.58925061744962e-17	8.89793306915605e-17
2008039	6	7.4562760912002e-17	8.75836760806508e-17
2008039	7	7.35175397365623e-17	8.63684095584376e-17
2008039	8	7.50188070476807e-17	8.91788467937595e-17
2008039	9	7.48985170513583e-17	8.94212443360898e-17
2008039	10	7.68275228396075e-17	9.29552212196831e-17
2008039	11	7.67120664290683e-17	9.32223781391246e-17
2008039	12	7.7374257582012e-17	9.52355487832065e-17
2008039	13	7.73298831320318e-17	9.61075354829598e-17
2008039	14	7.5989170216713e-17	9.47579963720987e-17
2008039	15	7.54019712928406e-17	9.42513956548074e-17
2008039	16	7.3904519146245e-17	9.22666996389626e-17
2008039	17	7.25430338171603e-17	9.03099812869468e-17
2008039	18	7.08935054085975e-17	8.75655531081139e-17
2008039	19	6.97316138652525e-17	8.55617286251817e-17
2008039	20	6.86411694489639e-17	8.37335311725415e-17
2008039	21	6.79956814865085e-17	8.235682407605e-17
2008039	22	6.77470176611341e-17	8.16842094502769e-17
2008039	23	6.80820473154067e-17	8.19605806494521e-17
2008040	0	6.74632827174082e-17	8.08490642695564e-17
2008040	1	6.69128702513639e-17	7.98408631495126e-17
2008040	2	6.65343826074958e-17	7.91362230650281e-17
2008040	3	6.61154810594749e-17	7.84202928217125e-17
2008040	4	6.53507607228252e-17	7.74380181776908e-17
2008040	5	6.45969161809736e-17	7.66314680005751e-17
2008040	6	6.41063925015112e-17	7.6031220972041e-17
2008040	7	6.4008364658418e-17	7.60439539793397e-17
2008040	8	6.29619785668457e-17	7.49537031419686e-17
2008040	9	6.10981457671485e-17	7.39590066430064e-17
2008040	10	6.27152454080742e-17	7.86090649750105e-17
2008040	11	6.40711566911002e-17	8.25336690607232e-17
2008040	12	6.41928668398222e-17	8.37299248306312e-17
2008040	13	6.32947566521312e-17	8.3022743568894e-17
2008040	14	6.11167790633968e-17	8.06075784636984e-17
2008040	15	5.81828020281126e-17	7.71935643121706e-17
2008040	16	5.52823602385277e-17	7.4269236328056e-17
2008040	17	5.2694247224794e-17	7.14635944874729e-17
2008040	18	5.10885752915537e-17	6.89219383370348e-17
2008040	19	4.99573351108691e-17	6.62055449553952e-17
2008040	20	4.91033110095688e-17	6.39489427605491e-17
2008040	21	4.89685587533513e-17	6.21276186633903e-17
2008040	22	4.86120720025536e-17	6.06592794835615e-17
2008040	23	4.82775341321479e-17	5.96265450785509e-17
2008041	0	4.86216397018551e-17	5.94105511775491e-17
2008041	1	4.86444336328585e-17	5.85560745879625e-17
2008041	2	4.81233526090549e-17	5.7251630423384e-17
2008041	3	4.74193090133405e-17	5.6204617572592e-17
2008041	4	4.67899643129392e-17	5.53099854872934e-17
2008041	5	4.58713337485901e-17	5.46182568929565e-17
2008041	6	4.49095373922971e-17	5.3951846030856e-17
2008041	7	4.41432639160741e-17	5.32635058842245e-17
2008041	8	4.43570982389877e-17	5.28257708334702e-17
2008041	9	4.58517885390543e-17	5.54079888062521e-17
2008041	10	4.79566927908266e-17	5.81450670406196e-17
2008041	11	5.01932601329589e-17	6.21475168888975e-17
2008041	12	5.01977668801301e-17	6.22464076146802e-17
2008041	13	5.08600936083528e-17	6.45015775013859e-17
2008041	14	5.03897065916178e-17	6.57218155859344e-17
2008041	15	4.9068959259372e-17	6.46348439179198e-17
2008041	16	4.80886924327102e-17	6.34236338869967e-17
2008041	17	4.73844711019527e-17	6.21762812744469e-17
2008041	18	4.68043342909878e-17	6.04610075964046e-17
2008041	19	4.62674367030315e-17	5.89555861166484e-17
2008041	20	4.55756213078396e-17	5.76794506712051e-17
2008041	21	4.52111540634988e-17	5.66916980504785e-17
2008041	22	4.46664648367224e-17	5.59371008420337e-17
2008041	23	4.47379045997358e-17	5.5459533472211e-17
2008042	0	4.50733833099254e-17	5.57935348426624e-17
2008042	1	4.49482772021378e-17	5.48276353650484e-17
2008042	2	4.47023908465813e-17	5.37868439830105e-17
2008042	3	4.43854958379729e-17	5.29215010359877e-17
2008042	4	4.39810708033727e-17	5.22413432915934e-17
2008042	5	4.36860202965792e-17	5.16280243942777e-17
2008042	6	4.34788430895439e-17	5.10164353367774e-17
2008042	7	4.29124058989695e-17	4.98587281622523e-17
2008042	8	4.21653426234919e-17	4.87647026669887e-17
2008042	9	4.30705904119677e-17	5.01150086447356e-17
2008042	10	4.45692171089111e-17	5.2668715629388e-17
2008042	11	4.53202288142421e-17	5.44973788846747e-17
2008042	12	4.60846653498395e-17	5.65894082316265e-17
2008042	13	4.55040500603505e-17	5.68598258424254e-17
2008042	14	4.33373111190884e-17	5.51598632531585e-17
2008042	15	4.01791874897996e-17	5.21441759338061e-17
2008042	16	3.81361013045829e-17	4.9489013173425e-17
2008042	17	3.73559569866967e-17	4.7906339636885e-17
2008042	18	3.68466127473173e-17	4.66840676518025e-17
2008042	19	3.63892414035606e-17	4.56995118238362e-17
2008042	20	3.59329272788489e-17	4.49200890111402e-17
2008042	21	3.55304259021585e-17	4.42176470445841e-17
2008042	22	3.51783173057187e-17	4.35137272201643e-17
2008042	23	3.4880245618508e-17	4.29050794952668e-17
2008043	0	3.46218531082573e-17	4.25125425601879e-17
2008043	1	3.43490397995067e-17	4.23215762341856e-17
2008043	2	3.41643382470362e-17	4.22945511649044e-17
2008043	3	3.40938697619999e-17	4.23143569902221e-17
2008043	4	3.37946072451394e-17	4.22383000103174e-17
2008043	5	3.32851562621862e-17	4.21748271499085e-17
2008043	6	3.28781224792664e-17	4.21875864047967e-17
2008043	7	3.23880760798004e-17	4.21387543622072e-17
2008043	8	3.15239789250663e-17	4.19974663745171e-17
2008043	9	3.07876309543009e-17	4.29769628711269e-17
2008043	10	3.56547319848119e-17	4.93675384664272e-17
2008043	11	3.98233147132861e-17	5.47904655134815e-17
2008043	12	4.232749008099e-17	5.6102342761992e-17
2008043	13	4.33637683443222e-17	5.70422274389145e-17
2008043	14	4.20905005269903e-17	5.53613041062758e-17
2008043	15	4.04040214891954e-17	5.35245993109784e-17
2008043	16	3.82706698089538e-17	5.17640876381533e-17
2008043	17	3.68298896510185e-17	4.98402700736091e-17
2008043	18	3.54603288398893e-17	4.78154948499773e-17
2008043	19	3.43542378948186e-17	4.57751605797161e-17
2008043	20	3.31748302541543e-17	4.38115189401745e-17
2008043	21	3.23151561450533e-17	4.19891696013042e-17
2008043	22	3.11328042624215e-17	4.0349437672653e-17
2008043	23	3.0053373546125e-17	3.89646655930082e-17
2008044	0	2.94359810908715e-17	3.78097946742233e-17
2008044	1	2.85830530611994e-17	3.68194842041787e-17
2008044	2	2.77914942938507e-17	3.59289394897432e-17
2008044	3	2.712331136489e-17	3.5146057646292e-17
2008044	4	2.65727286021584e-17	3.4541818687136e-17
2008044	5	2.5836107913271e-17	3.4078671569081e-17
2008044	6	2.55709696897744e-17	3.37206574462419e-17
2008044	7	2.50819311298913e-17	3.3425253192441e-17
2008044	8	2.49640277919923e-17	3.31320201497963e-17
2008044	9	2.61365309314641e-17	3.51396632352892e-17
2008044	10	2.80874459004432e-17	3.63428538856848e-17
2008044	11	2.83399296851645e-17	3.61299997685745e-17
2008044	12	2.84171973793226e-17	3.65170098880161e-17
2008044	13	3.00206675162777e-17	3.86355780140752e-17
2008044	14	3.35181386315634e-17	4.36368593298348e-17
2008044	15	3.61824988232438e-17	4.80767863942121e-17
2008044	16	3.74534140999259e-17	5.14733085658685e-17
2008044	17	3.78786270801922e-17	5.43566210280084e-17
2008044	18	3.76326001111148e-17	5.59068802250591e-17
2008044	19	3.70692799612979e-17	5.65719180934988e-17
2008044	20	3.61158297636288e-17	5.66823447233958e-17
2008044	21	3.53608483162796e-17	5.52973575710606e-17
2008044	22	3.4906752369859e-17	5.40726026023376e-17
2008044	23	3.50856112323172e-17	5.362214480717e-17
2008045	0	3.4713096318611e-17	5.310780772821e-17
2008045	1	3.40441447187754e-17	5.2316956064968e-17
2008045	2	3.37336363069279e-17	5.14638669896948e-17
2008045	3	3.25604526716696e-17	5.05628912526089e-17
2008045	4	3.12868393395217e-17	4.95483866925751e-17
2008045	5	2.90945062205899e-17	4.8422156247284e-17
2008045	6	2.81907454566345e-17	4.72602562467551e-17
2008045	7	2.68860173610877e-17	4.80405024938494e-17
2008045	8	2.57631552635275e-17	4.59327236804916e-17
2008045	9	2.486032178097e-17	4.35895278236998e-17
2008045	10	2.36507605406362e-17	4.08974903978951e-17
2008045	11	2.29094588142897e-17	3.95232556952063e-17
2008045	12	2.3532187749864e-17	4.04874452238641e-17
2008045	13	2.50814985410268e-17	3.91239237332393e-17
2008045	14	2.5587889390461e-17	3.6677885795165e-17
2008045	15	2.4381923019482e-17	3.4300689887929e-17
2008045	16	2.30545908611811e-17	3.14282567456697e-17
2008045	17	2.12685491436771e-17	2.77816358544518e-17
2008045	18	1.92834905334019e-17	2.38770055475565e-17
2008045	19	1.66164872387824e-17	1.96099457690229e-17
2008045	20	1.38419489923325e-17	1.56013388580885e-17
2008045	21	1.11659632304748e-17	1.23477266373498e-17
2008045	22	8.99852271552099e-18	9.86638003787352e-18
2008045	23	7.26092697779728e-18	7.86571027265148e-18
2008046	0	5.77964300866992e-18	6.20710048242266e-18
2008046	1	4.50924661261418e-18	4.82637936643401e-18
2008046	2	3.51200496544281e-18	3.74082986938077e-18
2008046	3	2.77952120053506e-18	2.94409900769456e-18
2008046	4	2.18877048211774e-18	2.31684087370216e-18
2008046	5	1.71843283598792e-18	1.8061759169773e-18
2008046	6	1.39385820503239e-18	1.44983163401816e-18
2008046	7	1.1812002126296e-18	1.23592466379967e-18
2008046	8	1.21897537618284e-18	1.30984600051001e-18
2008046	9	2.48482371540948e-18	2.81167628601145e-18
2008046	10	5.4154936437303e-18	6.16361618504225e-18
2008046	11	9.45697359645467e-18	1.06769399387999e-17
2008046	12	1.36981857424714e-17	1.53120547057682e-17
2008046	13	1.74480000141966e-17	1.93532304992759e-17
2008046	14	2.05312616893034e-17	2.25437770379806e-17
2008046	15	2.28499268293112e-17	2.47955777151565e-17
2008046	16	2.39369990694296e-17	2.55932497088127e-17
2008046	17	2.43041864014646e-17	2.5620339328044e-17
2008046	18	2.45832553176578e-17	2.56181349990177e-17
2008046	19	2.55881675933623e-17	2.66270162119925e-17
2008046	20	2.75254648121006e-17	2.84721467385418e-17
2008046	21	2.94967244169807e-17	3.03798136430791e-17
2008046	22	3.04422973170448e-17	3.14768298937345e-17
2008046	23	3.06529065339371e-17	3.18150032119867e-17
2008047	0	3.02658165223957e-17	3.14043851560601e-17
2008047	1	2.95149369361288e-17	3.06752239141864e-17
2008047	2	2.86670674268741e-17	2.99397746740975e-17
2008047	3	2.74266524441322e-17	2.87459048379114e-17
2008047	4	2.56919052977734e-17	2.69319183264756e-17
2008047	5	2.36534019428215e-17	2.47887855485103e-17
2008047	6	2.17608771214104e-17	2.27298952202411e-17
2008047	7	2.01126590723275e-17	2.09199468445332e-17
2008047	8	1.83321215342531e-17	1.90183167614743e-17
2008047	9	1.58139184942099e-17	1.64098160850668e-17
2008047	10	1.24693012825095e-17	1.29229089056384e-17
2008047	11	9.82817705237271e-18	1.01653412005894e-17
2008047	12	8.13039626553755e-18	8.3932656399168e-18
2008047	13	6.9842757097323e-18	7.18764398439259e-18
2008047	14	6.08401969300336e-18	6.23490500315347e-18
2008047	15	5.40308984337058e-18	5.52576879276221e-18
2008047	16	4.86979001852904e-18	4.9894752752768e-18
2008047	17	4.40771953642562e-18	4.55529765617769e-18
2008047	18	3.96990967001255e-18	4.21449742899292e-18
2008047	19	3.56389343959856e-18	3.91889024480287e-18
2008047	20	3.28186478574175e-18	3.6411149385163e-18
2008047	21	3.14437751624393e-18	3.37522238955355e-18
2008047	22	2.94890003201771e-18	3.13871237464892e-18
2008047	23	2.78214495509672e-18	2.97430286796755e-18
2008048	0	2.71524961043525e-18	2.91358356121981e-18
2008048	1	2.74073110976915e-18	2.94443683110034e-18
2008048	2	2.83986434984744e-18	3.0356908080661e-18
2008048	3	2.96509144152015e-18	3.17582547531726e-18
2008048	4	3.12706443871453e-18	3.35276832629682e-18
2008048	5	3.29766022377391e-18	3.50962665794205e-18
2008048	6	3.51025704772645e-18	3.71178287330244e-18
2008048	7	3.70501214892913e-18	3.90910881570298e-18
2008048	8	3.91808439836271e-18	4.10120836041456e-18
2008048	9	4.20206268774101e-18	4.37279993372734e-18
2008048	10	4.39984320537562e-18	4.56025491533798e-18
2008048	11	4.50975511378113e-18	4.68730996515068e-18
2008048	12	4.54012498301835e-18	4.72061672647335e-18
2008048	13	4.52115091647838e-18	4.70180903329986e-18
2008048	14	4.49057772310329e-18	4.67738154685088e-18
2008048	15	4.43871779051048e-18	4.63827843988448e-18
2008048	16	4.37733617194431e-18	4.58331483309878e-18
2008048	17	4.27682612285649e-18	4.48494319818003e-18
2008048	18	4.19024627424663e-18	4.38868808737334e-18
2008048	19	4.15390194656495e-18	4.34935984437305e-18
2008048	20	4.15861732793184e-18	4.36978432816484e-18
2008048	21	4.23399447854786e-18	4.47076557493029e-18
2008048	22	4.33824887608483e-18	4.60942523053434e-18
2008048	23	4.56480546988857e-18	4.88346259317101e-18
2008049	0	4.7506795524198e-18	5.08882106695833e-18
2008049	1	4.99694533084797e-18	5.3608835526686e-18
2008049	2	5.29377899975524e-18	5.68235110952293e-18
2008049	3	5.592606688667e-18	6.00428929340199e-18
2008049	4	5.89558382604991e-18	6.32547068844747e-18
2008049	5	6.26777547105123e-18	6.69465603131384e-18
2008049	6	6.6310057195423e-18	7.07347484837353e-18
2008049	7	7.02901591824325e-18	7.53861243251096e-18
2008049	8	7.93033691597259e-18	8.645618661898e-18
2008049	9	8.68669906475593e-18	9.54434554284029e-18
2008049	10	9.30316949723554e-18	1.03109730897489e-17
2008049	11	9.86778649890261e-18	1.09757858602943e-17
2008049	12	1.02944110117718e-17	1.14847325447973e-17
2008049	13	1.04586814176646e-17	1.1734234040618e-17
2008049	14	1.04256546353586e-17	1.17493404015452e-17
2008049	15	1.0323443110886e-17	1.17150317972433e-17
2008049	16	1.00669304642419e-17	1.15275046352959e-17
2008049	17	9.88957954107227e-18	1.14471948326889e-17
2008049	18	9.59006817398486e-18	1.13454409562164e-17
2008049	19	9.40035806064005e-18	1.12993853659014e-17
2008049	20	9.03524918276955e-18	1.12254865431236e-17
2008049	21	8.64367779583747e-18	1.11420960534024e-17
2008049	22	8.59855626286268e-18	1.11044779649076e-17
2008049	23	8.5684806888384e-18	1.09644420814764e-17
2008050	0	8.52990028909804e-18	1.07762465738618e-17
2008050	1	8.43166687913414e-18	1.05960033430002e-17
2008050	2	8.23464434805819e-18	1.02815605737775e-17
2008050	3	7.90940183878553e-18	9.85341562379257e-18
2008050	4	7.43348345662275e-18	9.36987270630876e-18
2008050	5	6.82102317604431e-18	8.86164378443395e-18
2008050	6	6.18974471953001e-18	8.27601150221549e-18
2008050	7	5.74512792063862e-18	7.74585646821756e-18
2008050	8	5.48081725164589e-18	7.48713257541835e-18
2008050	9	5.38837332728878e-18	7.46307914696787e-18
2008050	10	4.93419296289841e-18	6.81547612987594e-18
2008050	11	4.5014903535299e-18	6.10070543676098e-18
2008050	12	4.54299092860029e-18	5.84997744059658e-18
2008050	13	4.57380124180432e-18	5.80301598565127e-18
2008050	14	4.59356664208211e-18	5.84847568098253e-18
2008050	15	4.30722320790134e-18	5.98581213572664e-18
2008050	16	4.35625592518713e-18	6.24036015802082e-18
2008050	17	4.36655015259351e-18	6.35873968365526e-18
2008050	18	4.45882079122686e-18	6.50174299716969e-18
2008050	19	4.59265419152158e-18	6.64776318490109e-18
2008050	20	4.7150744475298e-18	6.73755112530645e-18
2008050	21	4.81803513731552e-18	6.76947200864866e-18
2008050	22	4.92989877880133e-18	6.80354054988872e-18
2008050	23	5.06258276220909e-18	6.88112441139917e-18
2008051	0	5.18821791849588e-18	6.98256709424582e-18
2008051	1	5.26174290085994e-18	7.06742740911973e-18
2008051	2	5.39054031961975e-18	7.09352623903628e-18
2008051	3	5.50076337846105e-18	7.05288645333873e-18
2008051	4	5.43521511727323e-18	6.95634579422451e-18
2008051	5	5.28302555501037e-18	6.81898601522135e-18
2008051	6	5.08293740107416e-18	6.64234277977744e-18
2008051	7	4.91486670545078e-18	6.42661053456271e-18
2008051	8	4.754797942256e-18	6.33215154929226e-18
2008051	9	4.55425014710439e-18	6.05053074296225e-18
2008051	10	4.37403491339684e-18	5.74726281465204e-18
2008051	11	4.29598004298036e-18	5.46543775349265e-18
2008051	12	4.22611149529341e-18	5.23685667261977e-18
2008051	13	4.22229571738956e-18	5.12163624106142e-18
2008051	14	4.35422438710399e-18	5.28210118960393e-18
2008051	15	4.67831981780542e-18	5.71487393618904e-18
2008051	16	5.21016129576841e-18	6.57669611372034e-18
2008051	17	6.00818449393281e-18	7.76467296084252e-18
2008051	18	6.60066234846417e-18	8.69052847507863e-18
2008051	19	7.53355148513469e-18	9.97063737673153e-18
2008051	20	8.98879083084206e-18	1.19196073759222e-17
2008051	21	1.07552660750975e-17	1.42973992420618e-17
2008051	22	1.26859300365351e-17	1.69764501984471e-17
2008051	23	1.38649431726182e-17	1.8595968803346e-17
2008052	0	1.44109283620429e-17	1.95176936838963e-17
2008052	1	1.45991874352074e-17	2.01862976207489e-17
2008052	2	1.44164666359429e-17	2.04522582333633e-17
2008052	3	1.41087857116546e-17	2.03049476995316e-17
2008052	4	1.43980178971634e-17	1.99307133720555e-17
2008052	5	1.44838973109825e-17	1.95352407013333e-17
2008052	6	1.47823069060707e-17	1.92947522295261e-17
2008052	7	1.57242515866034e-17	1.96364381013019e-17
2008052	8	1.78957136426762e-17	2.22509701426693e-17
2008052	9	2.15039892325401e-17	2.61174321087577e-17
2008052	10	2.26064063359203e-17	2.6792808755411e-17
2008052	11	2.29018493688412e-17	2.68458997678329e-17
2008052	12	2.30062620598029e-17	2.72717330587046e-17
2008052	13	2.35308458236533e-17	2.78173629543741e-17
2008052	14	2.37255732553691e-17	2.77346605203555e-17
2008052	15	2.36629269813309e-17	2.76528869657552e-17
2008052	16	2.3497946469299e-17	2.7965959897305e-17
2008052	17	2.37972992498263e-17	2.88945990228278e-17
2008052	18	2.50022783792493e-17	3.03846210053869e-17
2008052	19	2.64975537703183e-17	3.18301439292765e-17
2008052	20	2.61600707668081e-17	3.14962942981973e-17
2008052	21	2.41340487010215e-17	2.90587756428921e-17
2008052	22	2.1601732924106e-17	2.55144472162989e-17
2008052	23	1.89293078392061e-17	2.18272391629701e-17
2008053	0	1.61052001295043e-17	1.81877837167279e-17
2008053	1	1.33624540836162e-17	1.49682714450485e-17
2008053	2	1.07125999540546e-17	1.20251019192832e-17
2008053	3	8.11990672040154e-18	8.95884093209274e-18
2008053	4	6.83821238235032e-18	7.53635171947165e-18
2008053	5	5.96361900036686e-18	6.5387037164027e-18
2008053	6	5.54793102144242e-18	6.08722540741019e-18
2008053	7	5.46658995509257e-18	6.00797408191187e-18
2008053	8	5.48784990602726e-18	5.99901352360293e-18
2008053	9	5.48354122848152e-18	5.9664992875996e-18
2008053	10	5.79122151095588e-18	6.33477013368717e-18
2008053	11	6.39689259849027e-18	7.05780839243902e-18
2008053	12	7.24334918372188e-18	8.0128507923293e-18
2008053	13	8.25908625000415e-18	9.21335341566836e-18
2008053	14	9.01971602956392e-18	1.00333162628713e-17
2008053	15	9.61754866669406e-18	1.07046348298656e-17
2008053	16	9.89755660929439e-18	1.10329628298459e-17
2008053	17	1.00182033345963e-17	1.11189608710002e-17
2008053	18	1.0318927741726e-17	1.14133614921587e-17
2008053	19	1.1109384724351e-17	1.21248500779372e-17
2008053	20	1.23664056923402e-17	1.33069555193836e-17
2008053	21	1.28389091178e-17	1.36577591253482e-17
2008053	22	1.2002411530993e-17	1.26777019397572e-17
2008053	23	9.55006055559363e-18	1.01158750536962e-17
2008054	0	9.28762957855038e-18	9.96056847893366e-18
2008054	1	1.61242983818495e-17	1.67376514591639e-17
2008054	2	4.16771332674675e-17	4.54118562764582e-17
2008054	3	7.13573172799639e-17	7.96359245103726e-17
2008054	4	8.57075127350315e-17	9.55721892297751e-17
2008054	5	8.97162147070104e-17	9.95689308947921e-17
2008054	6	8.92466543017812e-17	9.84357067562386e-17
2008054	7	8.77453803529511e-17	9.6131297480021e-17
2008054	8	8.68986559955698e-17	9.49149846256346e-17
2008054	9	8.67190600396886e-17	9.55474753644664e-17
2008054	10	8.60521441337987e-17	9.59489199647164e-17
2008054	11	8.26241459459688e-17	9.18578182591743e-17
2008054	12	7.7096670735685e-17	8.53492526913361e-17
2008054	13	7.01121435668357e-17	7.79301994586215e-17
2008054	14	6.2764062392794e-17	6.9240569455032e-17
2008054	15	5.54102137411893e-17	6.11496417716948e-17
2008054	16	5.02039390116595e-17	5.49355393793081e-17
2008054	17	4.5841069467544e-17	4.99345436820566e-17
2008054	18	4.17815500966727e-17	4.58266421071991e-17
2008054	19	3.79050998225341e-17	4.19026049342332e-17
2008054	20	3.32059544087043e-17	3.73170397811374e-17
2008054	21	2.73772363467731e-17	3.18953487140616e-17
2008054	22	2.2172179070823e-17	2.66008814170397e-17
2008054	23	1.71737315171707e-17	2.17279847172917e-17
2008055	0	1.46026359266425e-17	1.84820615948275e-17
2008055	1	1.26324278998277e-17	1.61578366983199e-17
2008055	2	1.12220477023244e-17	1.46145155608504e-17
2008055	3	1.09793631506552e-17	1.41931270714579e-17
2008055	4	1.11675394502944e-17	1.43004198310246e-17
2008055	5	1.13016453476913e-17	1.4561621584926e-17
2008055	6	1.12986923800691e-17	1.47370749624245e-17
2008055	7	1.14428884222663e-17	1.41973355072083e-17
2008055	8	1.13981562095748e-17	1.39269565895286e-17
2008055	9	1.21948844359708e-17	1.4681685428917e-17
2008055	10	1.22562167023929e-17	1.43424170359524e-17
2008055	11	1.25358066279375e-17	1.44517001266484e-17
2008055	12	1.32032718753611e-17	1.5184258455344e-17
2008055	13	1.24878747973609e-17	1.41312676923688e-17
2008055	14	1.14861322452226e-17	1.2874754775157e-17
2008055	15	1.05927033929549e-17	1.19159202870997e-17
2008055	16	9.79932260226678e-18	1.11715704431239e-17
2008055	17	9.54574074401261e-18	1.11384679982694e-17
2008055	18	9.91064716595653e-18	1.17952830441421e-17
2008055	19	1.04470456185124e-17	1.29034857040728e-17
2008055	20	1.17517542192383e-17	1.4837897162587e-17
2008055	21	1.62956621973472e-17	2.00433179251181e-17
2008055	22	1.9057920263722e-17	2.28302333565635e-17
2008055	23	1.97014064647221e-17	2.38803693319282e-17
2008056	0	2.00783640830134e-17	2.48638693994651e-17
2008056	1	2.10946021471435e-17	2.63831902564592e-17
2008056	2	2.23672043745975e-17	2.78828987776848e-17
2008056	3	2.39512545879908e-17	2.9929389758891e-17
2008056	4	2.57934975165541e-17	3.30585764182009e-17
2008056	5	2.82851217420081e-17	3.71364968805214e-17
2008056	6	2.9753546070106e-17	4.0216345999049e-17
2008056	7	3.07561792759976e-17	4.07095841736993e-17
2008056	8	2.91801694988259e-17	3.765775863374e-17
2008056	9	2.44522482885215e-17	3.19618847639266e-17
2008056	10	2.19158523899797e-17	2.75813703702163e-17
2008056	11	2.52774965793331e-17	2.94741724265041e-17
2008056	12	3.16086346221924e-17	3.66698845259736e-17
2008056	13	4.29496735625923e-17	5.16730562971281e-17
2008056	14	4.83241233764192e-17	5.85694586888348e-17
2008056	15	4.68605934384814e-17	5.64975516880589e-17
2008056	16	4.26141256813138e-17	5.15245181536964e-17
2008056	17	3.83875308354514e-17	4.691843815095e-17
2008056	18	3.43254582782902e-17	4.33139484212197e-17
2008056	19	3.09059639719861e-17	4.0582584103233e-17
2008056	20	2.96595774595544e-17	4.05586525061813e-17
2008056	21	2.86922950176753e-17	4.23027911915929e-17
2008056	22	2.92034015947621e-17	4.42521543905739e-17
2008056	23	3.20433748288288e-17	4.65297442172891e-17
2008057	0	3.51254849498302e-17	4.72321113071114e-17
2008057	1	3.89940902103565e-17	5.25497364262257e-17
2008057	2	6.2484690860665e-17	9.11253220611542e-17
2008057	3	1.16600961966658e-16	1.85578592423699e-16
2008057	4	1.00386208680523e-16	1.55467635252138e-16
2008057	5	7.47200744497177e-17	1.10383821465474e-16
2008057	6	5.45252731269634e-17	7.47443406663013e-17
2008057	7	5.04747819612634e-17	6.51170688214103e-17
2008057	8	5.32143575331999e-17	6.6056495667101e-17
2008057	9	5.79598850123581e-17	6.98665229162331e-17
2008057	10	6.07418773453905e-17	7.16692063498003e-17
2008057	11	6.77776451011532e-17	7.95517894079735e-17
2008057	12	7.09600226627952e-17	8.28517547007033e-17
2008057	13	6.91937774080426e-17	8.2203321812954e-17
2008057	14	6.28612123153204e-17	7.50110846289674e-17
2008057	15	5.15372718605636e-17	5.95565119461305e-17
2008057	16	4.32827215229015e-17	4.83469598398877e-17
2008057	17	3.58247088307367e-17	3.91909528080513e-17
2008057	18	2.93592111118048e-17	3.15643550807972e-17
2008057	19	2.33932350337085e-17	2.51236871624554e-17
2008057	20	1.77574499709337e-17	1.94241779339907e-17
2008057	21	1.63133709663662e-17	1.81127661181194e-17
2008057	22	1.7827281045799e-17	1.93825552114027e-17
2008057	23	2.45375059929562e-17	2.69102256900703e-17
2008058	0	3.18522898865005e-17	3.526493961838e-17
2008058	1	3.71840756831795e-17	4.08863501391224e-17
2008058	2	3.91724611207284e-17	4.30319071030582e-17
2008058	3	3.88619964640445e-17	4.26182781129138e-17
2008058	4	3.58090080807896e-17	3.97878383662199e-17
2008058	5	3.21497225093362e-17	3.58432030291724e-17
2008058	6	2.79739887467737e-17	3.11095779414041e-17
2008058	7	2.35632275569563e-17	2.59145339851562e-17
2008058	8	2.0720676555854e-17	2.26466322523264e-17
2008058	9	1.97291902847881e-17	2.14089174744779e-17
2008058	10	2.2536078730243e-17	2.46534010142801e-17
2008058	11	2.8787741982669e-17	3.18731810817545e-17
2008058	12	3.66128963906759e-17	4.09029501173236e-17
2008058	13	4.90009135736198e-17	5.6945106661309e-17
2008058	14	3.05144011386207e-18	4.23951785247187e-18
2008058	15	1.21882074880702e-16	1.6819644955938e-16
2008058	16	9.435744258135e-17	1.2231680262035e-16
2008058	17	8.01812674589993e-17	9.80248078247002e-17
2008058	18	7.30505125822046e-17	8.56080497252867e-17
2008058	19	7.37636148045016e-17	8.55393169158241e-17
2008058	20	7.45375107657297e-17	8.57060190518643e-17
2008058	21	7.32286948818855e-17	8.30257626230049e-17
2008058	22	7.70586274137521e-17	9.30985803585701e-17
2008058	23	7.09426182109587e-17	8.67686526667015e-17
2008059	0	7.01674190726182e-17	8.34207426965925e-17
2008059	1	7.43672365173727e-17	8.67783615308258e-17
2008059	2	7.80255396580686e-17	9.02282560083579e-17
2008059	3	7.87692829783591e-17	8.98534753366762e-17
2008059	4	7.88305539441451e-17	8.73958999874401e-17
2008059	5	7.76319781755186e-17	8.45621576362908e-17
2008059	6	7.65882141324838e-17	8.26066455063967e-17
2008059	7	7.61058382591323e-17	8.15292318429345e-17
2008059	8	7.52710945359883e-17	8.09843992439321e-17
2008059	9	7.39970853420644e-17	8.07268856040834e-17
2008059	10	7.35911671649406e-17	7.99963793702871e-17
2008059	11	7.1895755760585e-17	8.0575417728428e-17
2008059	12	7.03940277218435e-17	7.98740820515362e-17
2008059	13	6.87308074813721e-17	7.83480066232779e-17
2008059	14	6.66308561119163e-17	7.65453463997713e-17
2008059	15	6.44317044066922e-17	7.48603117844698e-17
2008059	16	6.32953186978344e-17	7.3121810846592e-17
2008059	17	6.20647627197906e-17	7.1714454215448e-17
2008059	18	6.01274352105658e-17	7.06403676625576e-17
2008059	19	5.90107699538054e-17	6.97543390510981e-17
2008059	20	5.88780511757339e-17	6.95494888930156e-17
2008059	21	5.85973999329291e-17	6.91393316732838e-17
2008059	22	5.90034736504106e-17	7.06441596578031e-17
2008059	23	5.86479933219342e-17	7.19009335663534e-17
2008060	0	5.80730328210944e-17	7.27887519109817e-17
2008060	1	5.84572732339812e-17	7.48846001596657e-17
2008060	2	5.92858538647266e-17	7.69495292809875e-17
2008060	3	6.06084847690867e-17	7.73559789043938e-17
2008060	4	5.85479564700603e-17	7.5593920340044e-17
2008060	5	5.70451359841763e-17	7.34127619840769e-17
2008060	6	5.63401953556598e-17	7.21388027453717e-17
2008060	7	5.58075425177239e-17	7.14445999245158e-17
2008060	8	5.55683683633344e-17	6.99880548868684e-17
2008060	9	5.44037357063423e-17	6.72856852452738e-17
2008060	10	4.78590665757888e-17	5.85419795455308e-17
2008060	11	4.31393435211627e-17	5.232877065618e-17
2008060	12	4.08428080296303e-17	4.92421876312211e-17
2008060	13	3.98176590657248e-17	4.77726349418794e-17
2008060	14	3.93952217783558e-17	4.73552615609257e-17
2008060	15	3.98733583380479e-17	4.83929318892023e-17
2008060	16	4.19728579347827e-17	5.09009501581562e-17
2008060	17	4.59802796368733e-17	5.46749944586563e-17
2008060	18	4.77569598880745e-17	5.6344069960754e-17
2008060	19	4.35479527634535e-17	5.08541823833769e-17
2008060	20	3.44996656151886e-17	3.98194529597423e-17
2008060	21	2.55022028586752e-17	2.93149016188696e-17
2008060	22	1.67438319143832e-17	1.97773638095875e-17
2008060	23	1.95247611785009e-17	2.29464504240566e-17
