# Supplementary material for: A comparison of sea salt emission parameterizations in northwestern Europe using a chemistry transport model setup
Source: Copernicus journal article supplement (doi:10.5194/acp-16-9905-2016), 2016-08-08
Supplement: Supplementary file 2 [file acp-16-9905-2016-supplement.zip › conc/conc.timeseries.values.win2008.zero.Na.moreStations.csv]

doy	hour	DE0001R	DE0002R	DE0003R	DE0007R	DE0009R	DE0044R	DK0003R	DK0005R	DK0008R	DK0031R	FI0009R	FI0017R	NO0001R	NO0056R	PL0002R	PL0003R	PL0004R	SE0014R	NL0011R
2008001	0	2.69043087985878e-17	1.32280050157955e-17	8.48574088324661e-18	2.63467565919079e-17	2.82895691392883e-17	1.96282069189751e-17	2.81485194214359e-17	2.92512634670231e-17	2.78533027520725e-17	2.95412429993307e-17	4.12718647201703e-17	4.29584596893684e-17	3.01105946005681e-17	2.67967849889909e-17	3.08363097484986e-17	2.73006340833898e-17	4.03679916553781e-17	2.78045263553064e-17	7.08306769938889e-18
2008001	1	2.82767507513744e-17	1.35996713888173e-17	8.2023304529165e-18	2.60133463496568e-17	2.80661143581535e-17	1.94739219526924e-17	2.81835514300697e-17	2.99392886581631e-17	2.78187539020974e-17	3.00547248908441e-17	4.27857756998532e-17	4.31222205374017e-17	2.89248030643461e-17	2.53962245951334e-17	3.08436411429278e-17	2.69388539312526e-17	3.90391395998197e-17	2.73974247416e-17	7.11782872656277e-18
2008001	2	2.95250464363656e-17	1.35633412287749e-17	7.89624367278975e-18	2.58431968069114e-17	2.76079781172164e-17	1.82522329177625e-17	2.81891410662646e-17	3.08273267347936e-17	2.73579706500366e-17	3.03251841273247e-17	4.23280018268763e-17	4.33262540612723e-17	2.78373819522904e-17	2.40805593807863e-17	3.04868654338731e-17	2.57846454409194e-17	3.83876350335331e-17	2.76948279167201e-17	7.16187864520045e-18
2008001	3	3.11317706394243e-17	1.35584248699436e-17	7.69239450806645e-18	2.61302277120741e-17	2.68886869962508e-17	1.7448574493649e-17	2.81072066316775e-17	3.16971888424427e-17	2.68289343763202e-17	3.01673987527517e-17	4.22854420418057e-17	4.39220235399691e-17	2.71179696832425e-17	2.29324509723648e-17	3.02849836820108e-17	2.46361670839461e-17	4.27060586716634e-17	2.71592228660456e-17	7.31478766546431e-18
2008001	4	3.25640607163076e-17	1.37261329136327e-17	7.56776617442558e-18	2.65885810140969e-17	2.59743555214362e-17	1.68952119707952e-17	2.80545746465848e-17	3.24545465268026e-17	2.61623775964325e-17	2.98647046127608e-17	4.27994200417379e-17	4.47864190348288e-17	2.661127967182e-17	2.16531960915359e-17	3.01493279330885e-17	2.39196440563111e-17	4.70782887393196e-17	2.60233870777866e-17	7.38475705987454e-18
2008001	5	3.33346911374067e-17	1.42200935659255e-17	7.46671227361226e-18	2.70733673456316e-17	2.51952307921743e-17	1.66038337147934e-17	2.76612658630181e-17	3.2297257796052e-17	2.57171556296223e-17	2.95087465871177e-17	4.33293663812206e-17	4.57069232654423e-17	2.62605519772934e-17	2.03094586020784e-17	3.00437380037003e-17	2.32874049673365e-17	4.24630167405726e-17	2.53868136811252e-17	7.46207040914247e-18
2008001	6	3.34718972854861e-17	1.51983152874571e-17	7.40540119480299e-18	2.7201725834958e-17	2.45326911092181e-17	1.66439931667122e-17	2.72794417254654e-17	3.11464240076962e-17	2.59338501173533e-17	2.91541677366964e-17	4.48707689034263e-17	4.63497377622412e-17	2.51968917945127e-17	1.88260313766978e-17	2.99503306843511e-17	2.27167272228266e-17	3.40849649779383e-17	2.61844460785925e-17	7.57905739588074e-18
2008001	7	3.37098160521363e-17	1.67188570348014e-17	7.61524537911446e-18	2.73603973958036e-17	2.39651248925992e-17	1.6902683480722e-17	2.70261921922697e-17	2.9607809382897e-17	2.6635278080201e-17	2.85242129354477e-17	4.72129085020797e-17	4.6811077056314e-17	2.38998804758852e-17	1.73321046115552e-17	3.02715443702964e-17	2.21757756803838e-17	3.73611260912621e-17	2.68485145427204e-17	7.68689815882054e-18
2008001	8	3.36005189239953e-17	1.884908365104e-17	7.85376323012704e-18	2.71148085450237e-17	2.35344193958159e-17	1.73501591130686e-17	2.69881815136065e-17	2.84277448328324e-17	2.64857526600605e-17	2.784108117306e-17	5.00670580933245e-17	4.71258715932414e-17	2.26344512796911e-17	1.59742202652362e-17	3.01423473341861e-17	2.16878676444302e-17	3.6297241923616e-17	2.65669053635681e-17	7.76350517209075e-18
2008001	9	3.35108812021485e-17	2.16637260215155e-17	8.42960720667396e-18	2.67388656111721e-17	2.32772325201751e-17	1.85669801246623e-17	2.71056008831456e-17	2.7779109547214e-17	2.57575322005563e-17	2.76650013046156e-17	5.10668589188228e-17	4.70948914238167e-17	2.16021156164748e-17	1.4858930900933e-17	2.92501489044652e-17	2.08426686390954e-17	3.40698427070541e-17	2.59886217737807e-17	7.69872114484135e-18
2008001	10	3.32716516426771e-17	2.47031318923323e-17	9.05916567995278e-18	2.61805091086863e-17	2.33406703690815e-17	2.03934356797361e-17	2.72398331926328e-17	2.67669842056646e-17	2.53319902720578e-17	2.76574880998157e-17	5.06503736302358e-17	4.63506473406871e-17	2.13163396804174e-17	1.43150480464701e-17	2.79492304067701e-17	2.05324532303432e-17	3.26295048942508e-17	2.46330205950799e-17	7.71833855666931e-18
2008001	11	3.23830864422981e-17	2.83109727825255e-17	1.03614093789663e-17	2.5554151775884e-17	2.37591579198264e-17	2.13539242133795e-17	2.71403930761201e-17	2.52480521185162e-17	2.54136849944557e-17	2.75410186123617e-17	4.88257218581435e-17	4.53141278774431e-17	2.11045198617058e-17	1.42569264284365e-17	2.64100666061536e-17	2.05065479720355e-17	3.25609918332195e-17	2.41846402595359e-17	7.84660568423195e-18
2008001	12	3.1793356432848e-17	3.04633354127188e-17	1.21115804397904e-17	2.49648753360046e-17	2.51442717681204e-17	2.29375131870528e-17	2.65482911339648e-17	2.47591057518942e-17	2.61224048505317e-17	2.67367721225838e-17	4.59589691024882e-17	4.40761437361002e-17	2.0810852434617e-17	1.42105518100906e-17	2.42842378319892e-17	2.11409315088264e-17	3.17381058130454e-17	2.49059221213441e-17	7.74205310885678e-18
2008001	13	3.13315355476847e-17	3.09208052939343e-17	1.22866407717719e-17	2.43360623428481e-17	2.97362686245015e-17	2.50022434643044e-17	2.6159937496505e-17	2.45692463274094e-17	3.04803126598832e-17	2.57922380688398e-17	4.25970928934176e-17	4.27144634491959e-17	2.00405097351488e-17	1.40730750416848e-17	2.18125283972939e-17	2.15975649905104e-17	3.07939852301639e-17	2.66431443650257e-17	7.51086386663722e-18
2008001	14	3.09425562369703e-17	3.12365224221265e-17	1.2649579378648e-17	2.39133796628114e-17	4.12669328384149e-17	2.75122905785141e-17	2.60530174114535e-17	2.46467890629563e-17	3.31076049334463e-17	2.5021458588187e-17	3.86171827782756e-17	4.080746159658e-17	1.92402754502567e-17	1.41196832545008e-17	1.82669014095402e-17	2.17192146422391e-17	2.97660406155773e-17	2.82601521906909e-17	7.29895848205908e-18
2008001	15	3.05947150068075e-17	3.1237297028294e-17	1.30462418569792e-17	2.3662234142043e-17	7.79204345224453e-17	2.84792788143076e-17	2.58735527514513e-17	2.5232179186722e-17	3.40203626263471e-17	2.44844639830884e-17	3.38958403504508e-17	3.87907708542027e-17	1.8679695696007e-17	1.43575875985367e-17	1.44930368680836e-17	2.17746218244868e-17	2.96479391422764e-17	3.05871229469939e-17	7.13088721784541e-18
2008001	16	3.04215544114117e-17	3.08128200947058e-17	1.34236371798552e-17	2.36589950428853e-17	3.24855677562141e-17	2.83177652373209e-17	2.58190486306525e-17	2.62694869352207e-17	3.51938398390119e-17	2.4238125229585e-17	2.89237807076273e-17	3.71569738726742e-17	1.84878217246371e-17	1.45490123731996e-17	1.12039536109563e-17	2.19157277800779e-17	3.05208428967367e-17	3.36805570203862e-17	7.28360762255767e-18
2008001	17	3.06953250948572e-17	3.02294718991803e-17	1.36847365256288e-17	2.37594506815038e-17	5.73323734461549e-17	2.82121579427926e-17	2.60940126895989e-17	2.79053706486874e-17	3.65690895919993e-17	2.43212963172369e-17	2.49516546176119e-17	3.5613706362002e-17	1.84189009106428e-17	1.48653967650992e-17	8.4832483714354e-18	2.21757998241979e-17	3.18228192488677e-17	3.70867553608234e-17	7.29091125988726e-18
2008001	18	3.11957933866982e-17	2.97628382037229e-17	1.34258130663446e-17	2.37106726399237e-17	5.46401184619691e-17	2.82213902164946e-17	2.67026834808392e-17	3.07544322503594e-17	3.91239967199913e-17	2.45575965148903e-17	2.15288893342225e-17	3.40962326762531e-17	1.83808114446832e-17	1.53701148201826e-17	6.11782676744443e-18	2.24603883848208e-17	3.22395799144226e-17	4.01810885359192e-17	7.09649084859459e-18
2008001	19	3.16088294264138e-17	2.92626689274193e-17	1.34814839628962e-17	2.34907771012601e-17	4.88964089159525e-17	2.80843915624428e-17	2.73435106396199e-17	3.58213059604756e-17	4.04065925659915e-17	2.49545607342807e-17	1.88778052546259e-17	3.2833092791463e-17	1.86200028508095e-17	1.60664991746085e-17	4.32772240822777e-18	2.26976122561725e-17	3.25624112734359e-17	4.34804014019095e-17	6.86969049819267e-18
2008001	20	3.18174839210893e-17	2.8655485613509e-17	1.380181345205e-17	2.32060451187134e-17	4.60172888843879e-17	2.7988852243854e-17	2.73915680516583e-17	3.98238989884906e-17	4.09961118834884e-17	2.55148050357732e-17	1.62664653890016e-17	3.17728623170606e-17	1.89871288680282e-17	1.68157753967326e-17	3.20772319388923e-18	2.25829872637416e-17	3.22987608598044e-17	4.75192035349682e-17	6.67277050287133e-18
2008001	21	3.17898973805666e-17	2.79970506670405e-17	1.41709338840174e-17	2.33366641578277e-17	4.42097592377622e-17	2.77207876651512e-17	2.82855440665581e-17	4.15625975365617e-17	4.33321741235606e-17	2.57278979079026e-17	1.44853549533152e-17	3.06851456122577e-17	1.97545514866171e-17	1.77606786076423e-17	2.58046677747889e-18	2.2479773952983e-17	3.18502053151156e-17	5.18959675289561e-17	6.50379344215806e-18
2008001	22	3.17913421027351e-17	2.73573032595359e-17	1.45438396362667e-17	2.44542431181735e-17	4.20551476356891e-17	2.73776913783585e-17	3.17658039979836e-17	4.16182566949081e-17	4.41782440593056e-17	2.69101683853324e-17	1.29103381953179e-17	2.9048516733488e-17	2.08344384490889e-17	2.01868228381195e-17	2.34200650296449e-18	2.23598838509763e-17	3.18175540794807e-17	5.17677380374735e-17	6.82908397242412e-18
2008001	23	3.1943676834707e-17	2.67616370824952e-17	1.49824891923459e-17	2.66351376512248e-17	7.11659017895931e-17	2.69390499101469e-17	3.45986419836348e-17	3.90209866616621e-17	4.34939907464865e-17	2.81580065482916e-17	1.19290197140646e-17	2.72563538026289e-17	2.30762057596291e-17	2.41336631789565e-17	2.26814555980876e-18	2.22910741806644e-17	3.07356019782761e-17	4.87272211694481e-17	8.61000238294425e-18
2008002	0	3.23986809420669e-17	2.62450930915493e-17	1.5486307465426e-17	2.93428772342261e-17	5.11002112370734e-17	2.65264220790283e-17	3.74294927132766e-17	3.52315324696863e-17	3.92484918970067e-17	2.98185404578733e-17	1.1544051021017e-17	2.55847588933177e-17	3.33265739560702e-17	2.88670603326745e-17	2.19604379522928e-18	2.24172341958508e-17	3.00353761896796e-17	4.12996545549511e-17	1.05200716334922e-17
2008002	1	3.30819757228515e-17	2.57521508714339e-17	1.59550814866962e-17	3.22109028168868e-17	4.5613327770776e-17	2.61028508787489e-17	3.99965160850117e-17	3.17248334737684e-17	3.44231078748952e-17	3.20559784831124e-17	1.06898036245999e-17	2.43110058303227e-17	6.28415276669759e-17	3.46632652694394e-17	2.07737766379773e-18	2.26780571341239e-17	3.00034931588973e-17	3.52990361016404e-17	1.21777928346594e-17
2008002	2	3.37401614621103e-17	2.53412375367956e-17	1.63365918261429e-17	3.54413191754862e-17	4.31403582383679e-17	2.56815877337993e-17	4.13752534727348e-17	7.3151296125189e-17	2.98785216642684e-17	3.49210984605298e-17	1.01170448986406e-17	2.30525331882616e-17	2.69405989047898e-17	3.74616035992957e-17	1.9128926273989e-18	2.27550950626551e-17	2.80753817212001e-17	3.16797073717106e-17	1.29550584901434e-17
2008002	3	3.32424208218433e-17	2.49623761811674e-17	1.66155348965979e-17	3.90778591313463e-17	4.18137818683637e-17	2.53168545982126e-17	4.09578525363887e-17	1.15231876913312e-17	2.66346299150655e-17	3.78828456918996e-17	9.7513660794241e-18	2.1476286696336e-17	6.08470956029945e-17	3.74443624078686e-17	1.7246505347923e-18	2.28883286327421e-17	2.49211657290757e-17	2.9986065127595e-17	1.33651319855563e-17
2008002	4	3.28196677059525e-17	2.45717255767182e-17	1.68363156252239e-17	4.34439586319881e-17	4.17390730967664e-17	2.50896113155332e-17	3.95550425959925e-17	1.17126375235439e-19	1.2215820035236e-19	3.97523033027697e-17	8.91354368012675e-18	2.02727363956175e-17	5.83374696067524e-17	3.71195360735178e-17	1.54131280139204e-18	2.31036250251396e-17	2.13993397465141e-17	2.95398167524986e-17	1.42239769178609e-17
2008002	5	3.39398297638723e-17	2.41397635010398e-17	1.70989720168113e-17	4.52661020715358e-17	4.28892571615997e-17	2.54283513814585e-17	3.76058267764769e-17	2.38714988437993e-17	1.22956286907534e-19	3.98804281632921e-17	8.26685330928594e-18	1.88929259229232e-17	5.01671662409131e-17	3.65836430620837e-17	1.33508419491876e-18	2.31058920794393e-17	1.80242465282137e-17	2.93022723382234e-17	1.53984163291881e-17
2008002	6	3.60585001296616e-17	2.39593158093732e-17	1.73837742089214e-17	4.6658481903615e-17	4.27102595469916e-17	2.6074329661845e-17	3.56508489335297e-17	4.0859694298555e-17	1.23471351192734e-19	3.82512219917383e-17	7.77313580599809e-18	1.75104546083767e-17	4.20460075458056e-17	3.60211557238032e-17	1.10320292915392e-18	2.19642655994799e-17	1.49764240632679e-17	2.96255156363812e-17	1.68278083147552e-17
2008002	7	3.89874525526968e-17	2.5080274013532e-17	1.77245481519527e-17	4.50375896534973e-17	4.16235887040707e-17	2.71989550966175e-17	3.37924029306997e-17	4.31432595778e-17	1.2376301261611e-19	3.83087597202228e-17	7.21693662474601e-18	1.61262008485426e-17	5.2437507796093e-17	3.55268315810834e-17	8.31494857482026e-19	1.9800045357704e-17	1.14955908912098e-17	3.07799822353233e-17	1.86211290226068e-17
2008002	8	4.07432120666252e-17	2.56381092018513e-17	1.81162314226236e-17	4.03254218859811e-17	3.89524566027376e-17	2.83020596298501e-17	3.22321903603938e-17	4.37610902757592e-17	3.60518065776333e-17	3.75745341900176e-17	6.94636363949074e-18	1.53244531946594e-17	1.23707381540374e-19	3.50153290459605e-17	6.3806432603137e-19	1.74458876599191e-17	9.07445100696073e-18	3.2090620375294e-17	2.02981168871578e-17
2008002	9	4.35939193862469e-17	2.7287556706826e-17	2.12051674649649e-17	3.44612599985861e-17	3.57025123767667e-17	2.83887683660457e-17	3.15476293465279e-17	4.38297663955806e-17	7.17545816442524e-17	3.59308732412644e-17	6.8526512826619e-18	1.49430624067018e-17	1.2383685347111e-19	3.42925250297361e-17	5.27638550507949e-19	1.57387410415803e-17	7.82936824331127e-18	3.24673088274862e-17	2.19389799525437e-17
2008002	10	6.9990699783036e-17	2.98403430580323e-17	2.49590827180827e-17	2.93677324210439e-17	3.25860114104583e-17	2.69686959246579e-17	3.13340641806421e-17	4.2710512198849e-17	3.40680225662714e-17	3.38226806125736e-17	6.94677991571515e-18	1.47969525088867e-17	1.23855347102046e-19	3.16151248470996e-17	4.58880876309565e-19	1.50221879850709e-17	6.97410662174558e-18	3.21736669580515e-17	2.39677137301734e-17
2008002	11	4.77110708371389e-17	3.28641293581726e-17	2.67664091540432e-17	2.44315324883595e-17	2.94213428694303e-17	2.43968390929476e-17	3.13283768811963e-17	4.16998916916077e-17	2.85151535927623e-17	3.20018461007185e-17	7.24815946537285e-18	1.48624130632247e-17	2.60229044864422e-17	2.77720633140137e-17	5.44607403621555e-19	1.49871722415365e-17	6.16400466944294e-18	3.06103438496613e-17	2.56214145134468e-17
2008002	12	4.99388465964515e-17	3.48623555053031e-17	2.74253599563446e-17	2.01709489356005e-17	2.62060151169772e-17	2.16749674639184e-17	3.14331338129109e-17	3.95097976602954e-17	2.61320654608525e-17	3.10778616191796e-17	7.82957559040195e-18	1.47548872104351e-17	3.04574066090775e-17	2.48208878895027e-17	5.0825124978885e-19	1.43606731807481e-17	5.33123050680607e-18	2.84613091873736e-17	2.68577768485582e-17
2008002	13	4.78736945099428e-17	3.55697307486911e-17	2.79136969718561e-17	1.68142169602794e-17	2.32216220437014e-17	1.972483268872e-17	3.0543428373088e-17	3.6406927500911e-17	2.42723335673979e-17	3.11795177271606e-17	8.48560238214455e-18	1.44611728528464e-17	3.11109739825881e-17	2.24324106169109e-17	4.43582536404335e-19	1.24507232091832e-17	4.54698563225883e-18	2.6355597668258e-17	2.732294072016e-17
2008002	14	4.61404546660931e-17	3.45071964652784e-17	2.75311704681698e-17	1.36448140966097e-17	2.00646956407424e-17	1.814050898959e-17	2.8462482491345e-17	3.29751102922553e-17	2.18587899252917e-17	3.09362183869171e-17	9.19746519525941e-18	1.42647461671715e-17	3.07591368736197e-17	2.0600409818846e-17	3.84003900580218e-19	1.05279270589667e-17	3.85999951785078e-18	2.48642307542421e-17	2.73806552844578e-17
2008002	15	4.41038732490292e-17	3.15482431044717e-17	2.70237734209964e-17	1.03340719234923e-17	1.6086634374673e-17	1.55796637109742e-17	2.59223702043799e-17	2.9178705281563e-17	2.10147411996319e-17	2.93859667610077e-17	9.38621284497608e-18	1.38580344789236e-17	3.00874873808429e-17	1.93084178415262e-17	3.27043000767162e-19	8.64511956593212e-18	3.0287350980381e-18	2.29402703680137e-17	2.74645770601453e-17
2008002	16	4.14602091286831e-17	2.8011301283872e-17	2.69999039137515e-17	7.4666138414103e-18	1.24196698651455e-17	1.29708182798332e-17	2.37172259931034e-17	2.60150455407364e-17	1.85099382284914e-17	2.81231386328202e-17	9.43971456415967e-18	1.34053522941688e-17	2.87565065784793e-17	1.79616198773623e-17	2.55123738601816e-19	7.1750913668398e-18	2.31816474027828e-18	2.02968019580044e-17	2.73975274117668e-17
2008002	17	3.79250513997043e-17	2.33008613506732e-17	2.58187822459884e-17	5.36828314537285e-18	9.82888000516544e-18	1.13002109775984e-17	2.14703849784366e-17	2.23795461690056e-17	1.56522920442814e-17	2.61767405993086e-17	9.70180066569078e-18	1.28046304722302e-17	2.71877422185693e-17	1.6329770023617e-17	1.71963156009512e-19	6.19945026411319e-18	1.86049620086761e-18	1.75745437249685e-17	2.78185156391029e-17
2008002	18	3.42442618608919e-17	1.83004217568116e-17	2.5584656949189e-17	4.05602100736304e-18	8.04865502577168e-18	1.04601488043128e-17	1.89506066911314e-17	1.77657780495601e-17	1.31925159501381e-17	2.33497794648663e-17	1.01563201048992e-17	1.20303503594822e-17	2.49737811954057e-17	1.45516900772912e-17	1.08259825903146e-19	5.39554270504657e-18	1.47046618463401e-18	1.50096245105937e-17	2.83960896464101e-17
2008002	19	3.05892455269526e-17	1.43248628840111e-17	2.63501248015996e-17	3.31234367291264e-18	6.717489114073e-18	9.63369525385223e-18	1.62785825985265e-17	1.34940012019538e-17	1.11279102265088e-17	2.06163746005222e-17	1.05443355268553e-17	1.05154072795003e-17	2.22209435935524e-17	1.28814411653965e-17	6.91559870166149e-20	4.76104326058955e-18	1.15749913331197e-18	1.25755325804505e-17	2.85356555862566e-17
2008002	20	2.62069747402123e-17	1.05495907202478e-17	2.61139705773948e-17	2.95736777108112e-18	5.81927197512213e-18	8.92934606002567e-18	1.35177157596521e-17	1.03494017397487e-17	8.945753199301e-18	1.79004756273048e-17	1.08271645723739e-17	9.2216822001798e-18	1.98261834855824e-17	1.15317920525801e-17	4.53924496944171e-20	4.30623488764152e-18	9.81667659087527e-19	1.01848823844885e-17	2.81803126513973e-17
2008002	21	2.15195857931936e-17	7.79726821358937e-18	2.59877162031495e-17	2.80667986631517e-18	4.77243474962645e-18	8.25030315998192e-18	1.12172175322507e-17	8.23475035451269e-18	6.81034441771712e-18	1.46029049398922e-17	1.10036048229605e-17	8.29034889658576e-18	1.72977932128405e-17	1.04171399526694e-17	3.18727984249153e-20	4.01017328520974e-18	8.61892408666378e-19	8.00337745682645e-18	2.7938531126331e-17
2008002	22	1.77343233169388e-17	6.11562007208687e-18	2.60024225986869e-17	2.53988083082153e-18	4.01921984538211e-18	7.62200060163752e-18	9.21883422582798e-18	6.982264664402e-18	5.08776503472749e-18	1.19108321471867e-17	1.10381001380856e-17	7.49327977060869e-18	1.48273210008044e-17	9.41521325786536e-18	2.45471433477454e-20	3.81024124404773e-18	6.78954499965715e-19	6.05723352389482e-18	2.78241062603787e-17
2008002	23	1.40937961700064e-17	4.96578784560849e-18	2.61257282246372e-17	2.2027364269245e-18	3.63585037119489e-18	7.25504230771151e-18	7.30594100148736e-18	5.99902772465466e-18	3.73338752149462e-18	9.64592811476486e-18	1.04733937869351e-17	6.73263624954059e-18	1.22683241034009e-17	8.52078459529631e-18	2.03051899930456e-20	3.64405061939465e-18	5.06750125608207e-19	4.39349098555344e-18	2.78123860004466e-17
2008003	0	1.08615770903106e-17	4.32554997871483e-18	2.58725887911348e-17	2.02365673930189e-18	3.20507539056978e-18	7.23788141747109e-18	5.61152740016273e-18	5.14921913188284e-18	2.70461667639402e-18	7.68332581944423e-18	9.54244444535097e-18	5.84051376291804e-18	9.59002027264108e-18	7.77027908298867e-18	1.77232188664519e-20	3.50844852004583e-18	3.7294238744527e-19	3.1308714217009e-18	2.65242608385233e-17
2008003	1	8.26589828230636e-18	4.00568436991562e-18	2.52568390183005e-17	2.03651959762325e-18	2.90648020284951e-18	7.09945282658171e-18	4.27167219219744e-18	4.573444048178e-18	1.91164591780387e-18	5.98618738103432e-18	8.81822915432077e-18	5.11020519068189e-18	6.95756644218467e-18	7.11078715615562e-18	1.56112511874223e-20	3.40705086928743e-18	2.69320295014515e-19	2.15666587840419e-18	2.51267246443073e-17
2008003	2	6.43138355620673e-18	3.73334499908185e-18	2.44735570874491e-17	1.89350649916033e-18	2.47418694266191e-18	6.29899440860108e-18	3.32106855270066e-18	4.09675478951995e-18	1.34953561118081e-18	4.64632906800003e-18	8.17732894037124e-18	4.48810196931825e-18	4.90976206251447e-18	6.51420244022956e-18	1.46240380031621e-20	3.31275460353788e-18	1.94000708044651e-19	1.45188992660255e-18	2.59829860766198e-17
2008003	3	5.41456046019726e-18	3.53158899194091e-18	2.35717069223069e-17	1.59476428459871e-18	2.14209519680129e-18	5.56803825973638e-18	2.68831122916677e-18	3.57520977728274e-18	9.53639453474836e-19	3.6847668000771e-18	7.41668831843553e-18	3.88359580516721e-18	3.45577241678311e-18	6.00506161317517e-18	1.42322193232947e-20	3.22603398281934e-18	1.41078163612519e-19	9.69238338641527e-19	2.84054055268731e-17
2008003	4	4.8903720061137e-18	3.52312786011863e-18	2.2568368616313e-17	1.33892839785442e-18	1.83697908644379e-18	5.4765659110766e-18	2.09817207312387e-18	3.3006806175365e-18	6.63206173861529e-19	3.0897362298412e-18	6.53831134800412e-18	3.31227364712152e-18	2.46838907079744e-18	5.60199134992194e-18	1.50016947591742e-20	3.19801887256673e-18	1.05442535362977e-19	6.39802260466988e-19	2.85787074563408e-17
2008003	5	4.60006281451916e-18	3.62482300069147e-18	2.15809568302186e-17	1.21097146032847e-18	1.52658987077618e-18	6.05612238428596e-18	1.55898270858221e-18	3.04072101518366e-18	4.5912294531602e-19	2.52281191002671e-18	5.62210592703622e-18	2.79429892582634e-18	1.79434187978903e-18	5.31046415143622e-18	1.58280996951668e-20	3.3081814210765e-18	8.38482788051031e-20	4.24339794221232e-19	2.7636377066996e-17
2008003	6	4.43569983507216e-18	3.91753228240671e-18	2.06202727283504e-17	1.12227862939791e-18	1.25378415819577e-18	6.21784551904241e-18	1.18747867358401e-18	2.64583598815147e-18	3.2216731551142e-19	1.91383129012563e-18	4.72677217425154e-18	2.40115356788284e-18	1.33907769698243e-18	5.1498119196682e-18	1.63117474168059e-20	3.59313604821453e-18	7.15690391198005e-20	2.95438811515608e-19	2.62695304879765e-17
2008003	7	3.97066243740313e-18	4.1841329216089e-18	1.97893239943824e-17	1.04374083627692e-18	1.04412228649097e-18	6.00132480799577e-18	9.46518652684243e-19	2.21426947442445e-18	2.38515504050768e-19	1.52693447414185e-18	3.90142145324413e-18	2.05409599765841e-18	1.02908542871298e-18	5.06816919277915e-18	1.71387830057462e-20	4.09112002844223e-18	6.45780915256845e-20	2.27065272401193e-19	2.53490328166598e-17
2008003	8	3.62019145372105e-18	4.15360740576947e-18	1.9215399452748e-17	9.80057969616408e-19	8.71058816195993e-19	6.14015279896928e-18	7.28404127890729e-19	1.85617734711337e-18	1.9174585961477e-19	1.25314949487352e-18	3.22121773830632e-18	1.76361054520561e-18	8.10626264507418e-19	4.94857532079322e-18	1.81974148294611e-20	4.65134178194869e-18	6.07150792089032e-20	1.92365107306294e-19	2.50413906395041e-17
2008003	9	3.47597219176538e-18	4.15464586990135e-18	1.89897079108852e-17	1.03620318737454e-18	7.63203743235704e-19	6.67711326078478e-18	5.5895275630631e-19	1.65562946720761e-18	1.66675289415863e-19	1.00209040132898e-18	2.71870653328771e-18	1.39662317084429e-18	6.59873986968385e-19	4.68959610930629e-18	2.15644158908882e-20	6.67532984588181e-18	5.20414738042034e-20	1.70982382586992e-19	2.52584063065176e-17
2008003	10	3.10883870429083e-18	4.25152098001371e-18	1.89445034235013e-17	1.20990252851022e-18	7.4281620524179e-19	7.46691488056294e-18	4.72320932265293e-19	1.59638032736254e-18	1.48388542115945e-19	8.05555819444468e-19	2.27610662481088e-18	1.1497374613541e-18	5.65756528514751e-19	4.29178148217763e-18	2.85557935157111e-20	1.1039983140562e-17	4.76340899051185e-20	1.50572457566143e-19	2.56441879841936e-17
2008003	11	3.04588174222715e-18	4.52479518331709e-18	1.85763898246447e-17	1.60480995513569e-18	8.51899742205862e-19	8.49850296791159e-18	4.34495625219903e-19	1.67175100911775e-18	1.33011568958219e-19	7.24839937616798e-19	1.89735769705887e-18	1.02867246362998e-18	4.94068244479152e-19	3.85599758212265e-18	3.57256233247413e-20	1.09061791095926e-17	4.5986132508789e-20	1.26421279528019e-19	2.51168573518674e-17
2008003	12	3.1950511939711e-18	4.91338067286563e-18	1.80971851991377e-17	2.11787282606606e-18	1.09767362083129e-18	9.44588018708161e-18	4.16497268818496e-19	1.95666816772754e-18	1.18161159646571e-19	7.20470769057777e-19	1.61480431502778e-18	9.32890530312278e-19	4.38820854555791e-19	3.43136336817242e-18	4.16798901622001e-20	1.03424192958981e-17	4.75679956751606e-20	1.03237383543471e-19	2.38500070722967e-17
2008003	13	3.66067621234489e-18	5.13027047639533e-18	1.77302747672866e-17	2.37538758406649e-18	1.32951116757177e-18	9.79623353391888e-18	4.05838107754312e-19	2.33062730087691e-18	1.08564423978768e-19	7.23485346659617e-19	1.41468488762228e-18	8.03807409777944e-19	3.89234842794304e-19	2.96708366410246e-18	4.41382952071844e-20	9.70551237389255e-18	5.29144546626458e-20	8.59915998228929e-20	2.25479529421104e-17
2008003	14	4.35081703936813e-18	5.1106312210876e-18	1.73706422185261e-17	2.46992396522346e-18	1.63095007082762e-18	1.05269817557352e-17	4.09276777268569e-19	2.83337865250911e-18	1.33829302246044e-19	6.53528762467586e-19	1.27321023367514e-18	6.88166853712774e-19	3.30696172950181e-19	2.46266692040126e-18	4.68742976834233e-20	9.08674979412478e-18	7.36112075892318e-20	7.82163267896566e-20	2.13118326229633e-17
2008003	15	5.11988213211084e-18	5.14702897424067e-18	1.69691398262404e-17	2.56929970266764e-18	2.04001765593245e-18	1.09505665609673e-17	4.32206771480164e-19	3.17924043256283e-18	1.94716822823754e-19	6.39287487889839e-19	1.16362533397102e-18	5.82066786859534e-19	2.6986806752296e-19	1.93137923472091e-18	5.32569781121903e-20	8.67512221076958e-18	7.47507028066878e-20	8.57447615954004e-20	2.03219143114723e-17
2008003	16	5.18566323476961e-18	5.58819874270496e-18	1.65681821532292e-17	3.17666991212898e-18	2.40599624170666e-18	1.05305392380817e-17	4.5680883174682e-19	3.82989556791071e-18	2.90985945932019e-19	6.90466764684877e-19	1.06217133851572e-18	4.88485747677925e-19	2.11255707731623e-19	1.43329865016401e-18	6.51662978300798e-20	8.15180018537727e-18	8.87266079863946e-20	1.14881125382884e-19	1.96036838398981e-17
2008003	17	5.17445876114702e-18	6.47952146823476e-18	1.63145180745643e-17	3.25798595208591e-18	2.72036732181511e-18	1.00790188588952e-17	5.77235610713486e-19	4.27336373784674e-18	3.94682119071349e-19	7.4599021147242e-19	9.59757004316606e-19	4.09839326808931e-19	1.61256814828439e-19	1.01757160173918e-18	7.61291870776124e-20	7.27069124089183e-18	1.00390183746945e-19	1.60045544849397e-19	1.9519137936246e-17
2008003	18	5.54585905231042e-18	7.11859050385201e-18	1.62479920800329e-17	3.30009047765057e-18	3.18210138700833e-18	1.00495485732423e-17	9.97016871876211e-19	4.3782449319551e-18	5.05713331051196e-19	9.50187391142937e-19	8.5800502509775e-19	3.1637813168672e-19	1.27316022959723e-19	6.82937481781481e-19	8.28130377888942e-20	6.72490369847348e-18	9.72373722138588e-20	2.00476633625489e-19	1.95364223648969e-17
2008003	19	6.0609193609768e-18	7.58486252197451e-18	1.63128736875478e-17	3.38047756178035e-18	3.01222048704091e-18	1.01913366698709e-17	1.51617124150677e-18	4.19080073332952e-18	5.88435575177474e-19	1.51706231077276e-18	7.65671478958004e-19	2.55698748786567e-19	1.14682950295055e-19	4.7459302771585e-19	8.56287411515735e-20	6.34501914502956e-18	9.6851426593581e-20	2.45957043973721e-19	1.97945598058445e-17
2008003	20	6.07432471836161e-18	7.94052743103864e-18	1.63504802633825e-17	3.49886160040389e-18	2.65613109346834e-18	1.03907410565686e-17	1.83188499133347e-18	4.29392669385484e-18	6.38664938022093e-19	2.23095267175915e-18	6.81858033882265e-19	2.10158122990916e-19	1.24796429034821e-19	3.65170840875701e-19	8.48557868486689e-20	6.15513179579498e-18	1.01058580691654e-19	3.19655652807337e-19	2.01973815129183e-17
2008003	21	6.17200645450685e-18	8.13207054872127e-18	1.64338632839079e-17	3.56861122844872e-18	2.48075532987199e-18	1.05696705044901e-17	2.04229686021657e-18	4.50237576152536e-18	7.80794920298947e-19	2.73881972977045e-18	6.1213708510183e-19	1.72324416800225e-19	1.46285216652356e-19	3.0526934472601e-19	7.98918188039337e-20	6.52273969538805e-18	1.0604271877182e-19	3.74123186419135e-19	2.03822656341514e-17
2008003	22	6.58536889456148e-18	8.17055677020646e-18	1.66489913855568e-17	3.45855419937356e-18	2.49899516680461e-18	1.08372668678248e-17	2.34805344749785e-18	4.40436827329786e-18	1.06992940856904e-18	2.99334572339224e-18	5.33066825650881e-19	1.4328304093301e-19	1.50069219268169e-19	2.72653102290486e-19	7.27479432620419e-20	6.77385953304009e-18	1.11873964927829e-19	4.53963217589948e-19	2.04809079046178e-17
2008003	23	6.89228472741874e-18	8.45094515257419e-18	1.69524578038611e-17	3.29005436100043e-18	2.71841155667892e-18	1.11802474052065e-17	2.44128071479098e-18	4.33199154599584e-18	1.3043292622314e-18	3.12374658184396e-18	4.4795079159659e-19	1.19523391073475e-19	1.74193137118962e-19	2.53694743164301e-19	6.51406979151299e-20	6.92014676411422e-18	1.17501280355877e-19	5.73954637856343e-19	2.0599794367484e-17
2008004	0	7.39527894590886e-18	8.69459200095099e-18	1.73029761171212e-17	3.19651512447847e-18	2.73314690152939e-18	1.14916184232426e-17	2.79412727789827e-18	4.54352590927279e-18	1.33150698869686e-18	3.36679718724251e-18	3.70732773841048e-19	1.00062318361288e-19	2.30015950026995e-19	2.39375048279298e-19	5.80998363728022e-20	6.99174714689432e-18	1.24444797855843e-19	6.39257317264232e-19	2.0605653890776e-17
2008004	1	7.82190070690777e-18	8.9936083136735e-18	1.76945634998115e-17	3.15085776092796e-18	2.55976530984099e-18	1.17418284397498e-17	3.02680577008658e-18	4.53042681353222e-18	1.2439860766808e-18	3.73169640104898e-18	3.13970441387827e-19	8.46716131371301e-20	3.10603475889767e-19	2.28458324492861e-19	5.1182533700991e-20	6.97199232376678e-18	1.32634689515982e-19	6.47062715391601e-19	2.04880961850309e-17
2008004	2	7.98723432813602e-18	9.39331244378237e-18	1.84716818155108e-17	3.18432455449434e-18	2.43109415241965e-18	1.20170668988833e-17	3.04902066471758e-18	4.41446110425268e-18	1.09760811067951e-18	3.95895485921387e-18	2.66616078875942e-19	7.30638633006606e-20	4.09836075206258e-19	2.23437110254564e-19	4.44030769685558e-20	6.60227968108437e-18	1.40877498782984e-19	6.16278674224958e-19	2.03485477155127e-17
2008004	3	8.07713412736602e-18	9.90754587702992e-18	1.94420824259218e-17	3.22368142150988e-18	2.25659974381266e-18	1.23185998151415e-17	2.9302672256761e-18	4.34218509234125e-18	9.01376208919367e-19	3.95523576187417e-18	2.18731190820766e-19	6.46224639014998e-20	4.99953097163349e-19	2.28009185030139e-19	3.85487819119217e-20	6.5277206128519e-18	1.47430839582495e-19	5.50608814869387e-19	2.02665745127182e-17
2008004	4	8.01539348370898e-18	1.04071522802895e-17	2.02247821681334e-17	3.27026559743508e-18	2.15089306061283e-18	1.26003620620307e-17	2.70686854328304e-18	4.13291784466783e-18	8.33781579013055e-19	3.85085287088382e-18	1.65721115285559e-19	5.86310985660889e-20	5.58580297641833e-19	2.4373018887067e-19	3.23657572348173e-20	6.64679983150238e-18	1.53626506669016e-19	4.8828562932132e-19	2.02742370614813e-17
2008004	5	8.02225989178681e-18	1.07817144486506e-17	2.08437651172996e-17	3.31665734862138e-18	2.1603856318651e-18	1.28118533594901e-17	2.39379863649981e-18	4.02361175216432e-18	8.57758920458152e-19	3.76394577094456e-18	1.15516530766918e-19	5.45524273154274e-20	5.81622965533116e-19	2.70568699818975e-19	2.75500315587062e-20	6.8325909877851e-18	1.59186085131213e-19	4.72725268712219e-19	2.02462430549359e-17
2008004	6	7.89716292691123e-18	1.10320175530669e-17	2.13627821307694e-17	3.37617095497187e-18	2.17982373245509e-18	1.28271701998035e-17	2.22170242180105e-18	4.04617658790871e-18	8.22848292141447e-19	3.71558514873315e-18	8.1374620960297e-20	5.23152575769862e-20	5.95032698244038e-19	3.06946640185509e-19	2.38520126556827e-20	6.89324211727489e-18	1.62917885131696e-19	4.88288852900155e-19	2.00412487439831e-17
2008004	7	7.97320546684872e-18	1.11718753136076e-17	2.16359445237718e-17	3.47868763985198e-18	1.96672329049999e-18	1.26613923297918e-17	2.1395828085387e-18	3.76026540626608e-18	8.28201847783697e-19	3.66055878775525e-18	6.00060002657921e-20	5.1968414448322e-20	6.21899793912618e-19	3.48541544302073e-19	2.05654285058069e-20	6.98530329685203e-18	1.66357416250167e-19	5.08948745083405e-19	1.9759971477425e-17
2008004	8	8.18992575711416e-18	1.11957010311263e-17	2.18119731322301e-17	3.6421998485408e-18	1.98771496756343e-18	1.25567175209079e-17	2.23942381797406e-18	3.89422505673712e-18	8.21324606079353e-19	3.52790220709926e-18	4.72588134406004e-20	5.33757648279027e-20	6.68683539393135e-19	3.73439874753508e-19	2.56166515268178e-20	8.32115825492933e-18	1.6694858509546e-19	5.28989965404607e-19	1.96467233860606e-17
2008004	9	8.58222912589867e-18	1.12964686185087e-17	2.27359965031048e-17	3.85815143117257e-18	2.12722199079612e-18	1.32726021006748e-17	2.27491772447881e-18	4.22424532694804e-18	8.04872101456123e-19	3.50657062636534e-18	4.05442072981293e-20	5.63159283108483e-20	7.02478127417433e-19	3.86058019084006e-19	2.64482346778558e-20	9.36790784244084e-18	1.64700785465434e-19	5.39527959887333e-19	1.99575265933987e-17
2008004	10	8.96271535396048e-18	1.15704567950532e-17	2.31598380146468e-17	4.18039436618499e-18	2.48615789308474e-18	1.31770422178914e-17	2.35212656246759e-18	5.17055537563639e-18	8.58647372682312e-19	3.72449692024451e-18	3.68849095864035e-20	6.07294481931088e-20	7.56925597459812e-19	4.08349275423565e-19	2.0418909367647e-20	9.92471131979543e-18	1.66406412768842e-19	5.67966523790001e-19	2.06478700418998e-17
2008004	11	9.2200835812868e-18	1.16893841312094e-17	2.39681295158916e-17	4.13193102698725e-18	2.50316004008486e-18	1.27864990571671e-17	2.49186566007042e-18	5.52339956041896e-18	9.55608417766214e-19	4.19854145393475e-18	3.58536153288166e-20	6.62313648871361e-20	7.7076797058836e-19	4.2385499566738e-19	1.80723594500969e-20	1.03350849478039e-17	2.04146651754326e-19	6.18591843659167e-19	2.13845573356708e-17
2008004	12	9.25952467975384e-18	1.16027771609257e-17	2.37055030629035e-17	4.02416812951282e-18	2.60770149194038e-18	1.21502147743706e-17	2.76524239189558e-18	5.80975227309547e-18	1.1185833781984e-18	4.79439352395035e-18	3.91430987770736e-20	7.23151460554567e-20	8.01759009239807e-19	4.26557706819781e-19	1.73234967812631e-20	1.04065817444868e-17	2.60477016715314e-19	7.11177474479627e-19	2.23369871576097e-17
2008004	13	9.02348874123093e-18	1.13874573864041e-17	2.30371610331931e-17	3.85086851471405e-18	2.63214590068643e-18	1.18151181959532e-17	2.97286934828956e-18	6.12157930854586e-18	1.27803684763999e-18	5.20854165615358e-18	4.89763784735345e-20	7.93810996701613e-20	8.89353139792258e-19	4.16610857793283e-19	2.63541259920013e-20	1.05669150650895e-17	2.84319504213825e-19	8.24604292208868e-19	2.28806506276885e-17
2008004	14	8.93981573755792e-18	1.11992730580953e-17	2.22541093508573e-17	4.00549713046295e-18	2.63975772430882e-18	1.18245994750594e-17	3.18752951784801e-18	6.6222123428976e-18	1.48355997108083e-18	5.63713051629012e-18	6.58285940948608e-20	8.74448278375039e-20	9.79575702222943e-19	3.93496745228973e-19	3.15198811974013e-20	1.14138210004475e-17	3.28078943500692e-19	9.28590893139428e-19	2.19306004764952e-17
2008004	15	9.16041432531632e-18	1.10477731891525e-17	2.15511365660912e-17	3.97405673327171e-18	2.75441884681193e-18	1.1858713641032e-17	3.46104329142494e-18	6.75668098395228e-18	1.78705920979383e-18	5.56558466209436e-18	8.64170045865441e-20	9.68845540906101e-20	1.09061048566086e-18	3.74526769870865e-19	2.8142804042301e-20	1.17952658647876e-17	3.75654098827695e-19	1.09068127867281e-18	2.18801253955883e-17
2008004	16	9.8099555085934e-18	1.07608295337376e-17	2.12621072392839e-17	3.91416585883205e-18	2.67224856514062e-18	1.17185902799229e-17	3.742269688467e-18	6.61919824375387e-18	2.05602928225998e-18	5.56898235558471e-18	1.10819385735226e-19	1.07567661888918e-19	1.21818004297222e-18	3.58553249301521e-19	2.808360247302e-20	1.17611590135125e-17	4.42163310078953e-19	1.29435836860131e-18	2.26072176580876e-17
2008004	17	9.67502700493032e-18	1.00581113625049e-17	2.13280619708909e-17	4.09842123686637e-18	2.55843588316411e-18	1.14932996610915e-17	4.2713599243404e-18	6.38056118626644e-18	2.39239215002674e-18	5.88911324123527e-18	1.38377854938217e-19	1.2356733197277e-19	1.32689832953755e-18	3.43544191160011e-19	2.92908629958629e-20	1.22452914686516e-17	4.63631561811756e-19	1.53828879783643e-18	2.33947538974328e-17
2008004	18	9.3332586302009e-18	9.48520241459172e-18	2.14436923456607e-17	4.49473102290784e-18	2.54754618952448e-18	1.15472078424011e-17	4.97157841699316e-18	6.1098860995291e-18	2.75300446002799e-18	6.735861317978e-18	1.75070070748211e-19	1.45708176853452e-19	1.46554102834642e-18	3.29120548428961e-19	2.25503941812569e-20	1.31639500013921e-17	5.07441353915027e-19	1.79718975140804e-18	2.49200856873338e-17
2008004	19	9.48694939092371e-18	9.33685188703657e-18	2.22462178884656e-17	5.19041188749946e-18	3.17215720616272e-18	1.17163530658728e-17	5.43180071458051e-18	6.21519153567373e-18	3.01525834370238e-18	7.15832364969903e-18	2.2560092088073e-19	1.75210237687591e-19	1.66919046048113e-18	3.19004798120405e-19	1.91081787346137e-20	1.37788607821311e-17	6.84275907772062e-19	2.04091181162199e-18	2.46807776310577e-17
2008004	20	9.78300487293393e-18	9.68545494120263e-18	2.28720519120355e-17	6.40258880536351e-18	4.0296507967539e-18	1.18381845360622e-17	5.91455227780543e-18	6.34450949832542e-18	3.28590474555647e-18	7.34657209475806e-18	2.86049873673299e-19	1.9480508539819e-19	1.92767915520071e-18	3.13123338396016e-19	1.78416723236489e-20	1.44441050673856e-17	9.39181709793993e-19	2.27753391851082e-18	2.30713431910598e-17
2008004	21	9.98841216160344e-18	9.77787620529896e-18	2.25234853284568e-17	7.48352251371628e-18	4.73181009884851e-18	1.19642812629905e-17	6.10095348486269e-18	6.71269722079981e-18	3.49790687153804e-18	7.38743047306286e-18	3.56409218823041e-19	2.18397472015893e-19	2.15884464011758e-18	3.12607666833133e-19	1.96185725532499e-20	1.38901253953543e-17	1.19440374606745e-18	2.54315266920198e-18	2.2606364675081e-17
2008004	22	1.04399632980025e-17	1.00696217674486e-17	2.18824720460198e-17	8.27740742377084e-18	5.55863225130261e-18	1.21868653811819e-17	6.29623772116441e-18	6.73617426652298e-18	3.68225994447806e-18	7.43917439353251e-18	4.31878070043342e-19	2.62168502598384e-19	2.30546453125641e-18	3.21838363431574e-19	2.39725890291229e-20	1.36744809147398e-17	1.26773588427367e-18	2.82141024012156e-18	2.11572782085676e-17
2008004	23	1.1243758772331e-17	1.16155557078802e-17	2.23564172643353e-17	8.09906814958105e-18	6.24585088866147e-18	1.25576307212053e-17	6.79946683393987e-18	7.32418401481292e-18	3.99837622656827e-18	7.71415911550788e-18	5.08980155904561e-19	3.02651984974988e-19	2.50693085815325e-18	3.34008211851931e-19	2.8838628686447e-20	1.3811537976459e-17	1.51011163817176e-18	3.16702450771254e-18	2.23915035867348e-17
2008005	0	1.21620781650734e-17	1.34389744809324e-17	2.37619034110283e-17	8.12286726558977e-18	6.96022026152859e-18	1.3069458296125e-17	7.46541159003017e-18	8.38785940292787e-18	4.47927997544933e-18	8.50111739395087e-18	5.78931526467509e-19	3.46956791781809e-19	2.74964268023068e-18	3.54076224632122e-19	3.96138521284418e-20	1.42281380418987e-17	1.78266874929963e-18	3.58642600415362e-18	2.82916032885925e-17
2008005	1	1.30745258279314e-17	1.49144521116722e-17	2.53574196073056e-17	8.68655979671458e-18	7.83093223892319e-18	1.40199441345006e-17	8.2664478653408e-18	9.1349661618263e-18	5.22632356908587e-18	9.26861515947923e-18	6.38752731972823e-19	4.08488725616914e-19	3.10556386797404e-18	4.07268252864759e-19	5.7347370843942e-20	1.4997185653322e-17	2.10285116572306e-18	4.1342318345831e-18	3.31400284811659e-17
2008005	2	1.39243783252776e-17	1.63926705770027e-17	2.69303492067364e-17	1.08718914740463e-17	8.58581008360923e-18	1.769149488075e-17	9.10412687537273e-18	1.02693455944632e-17	6.22588746465265e-18	1.00636503710682e-17	6.79400671925272e-19	4.86626143847005e-19	3.41733820824775e-18	4.91126269113067e-19	7.64044027421164e-20	1.54948631273284e-17	2.56497988242686e-18	4.88026189072582e-18	3.18917842196783e-17
2008005	3	1.56075202634954e-17	1.77309391959492e-17	2.80124356846347e-17	1.21848771345289e-17	9.69088328193344e-18	2.04832065244793e-17	9.90040301288257e-18	1.14275735795273e-17	7.41250292908411e-18	1.07148986665124e-17	6.97493241345098e-19	5.80813596715675e-19	3.79377095523157e-18	5.93590920674978e-19	9.4629386161024e-20	1.55957276165348e-17	3.26685670504403e-18	5.59306771048153e-18	2.07383449452122e-17
2008005	4	1.73580138302597e-17	1.95372672273008e-17	2.96286265979268e-17	1.36744696893677e-17	1.08261652789227e-17	2.2931709920153e-17	1.05095178936047e-17	1.2541823245291e-17	8.55809578356764e-18	1.13553703714842e-17	7.02065243074041e-19	6.84780816782764e-19	4.35539871516612e-18	7.27442000775426e-19	1.05541357382031e-19	1.56203416898688e-17	4.03390092456699e-18	6.34768334186191e-18	1.05737409472008e-17
2008005	5	1.96585369887082e-17	2.1793358374831e-17	3.02991982414994e-17	1.51534389791595e-17	1.20328837833547e-17	2.50736168496143e-17	1.13220200803661e-17	1.42702084511099e-17	9.4551541629146e-18	1.20664250422693e-17	7.01166460290052e-19	7.84336539102174e-19	5.16401998125258e-18	9.15580620433656e-19	1.24827150518408e-19	1.54532481735227e-17	4.76753770217584e-18	7.22334885723847e-18	5.36736635546207e-18
2008005	6	2.25034893533412e-17	2.41986088331943e-17	3.03425634912211e-17	1.66386964032429e-17	1.35392173313339e-17	2.66191301630329e-17	1.21726725303691e-17	1.59894174416227e-17	1.00776079490897e-17	1.26037870137474e-17	6.98733189535065e-19	8.98111512086768e-19	6.13996146876003e-18	1.1512699748715e-18	1.56548233535908e-19	1.48468265788764e-17	5.35080626368752e-18	8.01723428741993e-18	3.52580008375315e-18
2008005	7	2.48373218804552e-17	2.60382105397383e-17	3.01434017362495e-17	1.85408029612244e-17	1.49757159785136e-17	2.77851957568785e-17	1.28169211155891e-17	1.73625005787834e-17	1.06208113947969e-17	1.33038252051552e-17	6.92923840197055e-19	1.02229256222461e-18	7.10407181404602e-18	1.4534646958556e-18	1.9040439948768e-19	1.42092125759707e-17	5.87195619564496e-18	8.67280448514041e-18	8.12443488954154e-18
2008005	8	2.59479021299603e-17	2.72337018567667e-17	2.93389377564562e-17	2.01097634595452e-17	1.5906829887821e-17	2.897098764858e-17	1.35287851442698e-17	1.82848960078922e-17	1.10241418502746e-17	1.47060128633741e-17	6.85526014938926e-19	1.18934005568529e-18	7.98328097224613e-18	1.84418084572548e-18	4.00577182390214e-19	1.37290344404144e-17	6.42979275405852e-18	9.43129512248725e-18	3.13772315071333e-17
2008005	9	2.20631040183749e-17	2.84724413023615e-17	2.81825320195385e-17	2.11076737709808e-17	1.69655227775538e-17	3.01699855271877e-17	1.46527774773879e-17	2.01126938541061e-17	1.15122574409421e-17	1.63720854552088e-17	6.78549485608575e-19	1.35839057849901e-18	8.64633027311302e-18	2.25640020476953e-18	8.19264781542958e-19	1.50848358979773e-17	6.94452609739615e-18	1.04899695629852e-17	7.06989899398714e-17
2008005	10	1.7092888246786e-17	3.0004030472358e-17	2.43542975748585e-17	2.19175926360376e-17	1.85917888100932e-17	3.12576410376629e-17	1.57744118501535e-17	2.21945556419147e-17	1.30943782481584e-17	1.81265861192024e-17	6.65313997972693e-19	1.49330863918259e-18	9.29167048473125e-18	2.58242650005041e-18	1.29842625617476e-18	1.57187186222843e-17	7.29756970857285e-18	1.08183352906493e-17	1.07805526925553e-16
2008005	11	1.3008942604358e-17	3.03265467877673e-17	2.01344444366397e-17	2.28181292036645e-17	1.96538572527335e-17	3.25702661329187e-17	1.7350172404329e-17	2.44631246968316e-17	1.48715679074844e-17	1.74800747339106e-17	6.41568755230173e-19	1.53356254159098e-18	1.0310495419629e-17	2.83910229258191e-18	1.72517105937956e-18	1.57631432790588e-17	7.57716889629844e-18	1.15067838820022e-17	1.07886038885841e-16
2008005	12	8.82612362332766e-18	2.90809106316431e-17	1.53999023760787e-17	2.42103170059826e-17	2.09791858569701e-17	3.33136074345749e-17	1.82904953101812e-17	2.68084632981503e-17	1.62003227031874e-17	1.68514026643096e-17	6.22727110357904e-19	1.62044735577781e-18	1.14036442528649e-17	3.19855430962591e-18	1.76922092657556e-18	1.55143965742644e-17	7.94201994730134e-18	1.273127378726e-17	1.0684656681468e-16
2008005	13	9.40477340823269e-18	2.65732481218767e-17	1.20226483487378e-17	2.45048843010257e-17	2.16285139198067e-17	3.33649643633052e-17	1.95236524116156e-17	2.73068812757864e-17	1.72105517218264e-17	1.71483494050452e-17	6.12103284776187e-19	1.75862148045576e-18	1.21200265996732e-17	3.67839179779268e-18	1.92773685552819e-18	1.4932941981881e-17	8.30220846238743e-18	1.394140289335e-17	1.06350125090702e-16
2008005	14	2.54342769831066e-17	2.37926165061096e-17	1.07688917224772e-17	2.4738017260323e-17	2.32680425686381e-17	3.39328845467982e-17	2.01965394790097e-17	2.55234524734733e-17	1.82501499933444e-17	1.65417705418604e-17	6.03495222870876e-19	1.88604707562479e-18	1.262910677034e-17	4.226660693703e-18	1.98896142100733e-18	1.5688088727916e-17	8.95989138450783e-18	1.52946770136942e-17	1.06181159240576e-16
2008005	15	5.78978705934142e-17	2.12596023851838e-17	1.00755148570298e-17	2.59341218496018e-17	2.5358748312947e-17	3.45062691297026e-17	1.98471098583908e-17	2.26029161720096e-17	1.85442540406897e-17	1.49395939063197e-17	6.04538723218339e-19	2.02327890950322e-18	1.33203698334415e-17	4.84614145438136e-18	1.94729879313363e-18	1.49774396767179e-17	9.717554112653e-18	1.61774543802922e-17	1.06674467019293e-16
2008005	16	8.14590397974013e-17	1.98665017431088e-17	1.00899471874878e-17	2.7794619208819e-17	2.5976095262539e-17	3.31039819976934e-17	1.84574018215574e-17	2.01639795061903e-17	1.89973994793981e-17	1.42231491297527e-17	6.21962704396312e-19	2.18431973983796e-18	1.38891450698351e-17	5.54787043489824e-18	1.75032474451935e-18	1.55440214346501e-17	1.05945238851057e-17	1.65419310585592e-17	1.06908323735244e-16
2008005	17	1.07829297599652e-16	1.98402161996267e-17	7.44675854857968e-18	2.86990350161278e-17	2.69803969294004e-17	2.82294283635384e-17	1.61250996816118e-17	2.07686409473037e-17	1.9217770795326e-17	1.86234644609222e-17	6.62580760817264e-19	2.36396390759897e-18	1.45157675133731e-17	6.27284255373749e-18	1.67569398937365e-18	1.57170969828454e-17	1.13939307245691e-17	1.69180627788683e-17	1.07528322314699e-16
2008005	18	1.01705975546594e-16	2.14915578272771e-17	5.68175839284326e-18	2.7785475972106e-17	2.72597324191604e-17	2.35450360628394e-17	1.44012798648599e-17	2.98959405795744e-17	1.939803506225e-17	2.19259310512938e-17	7.12403371817859e-19	2.54043499810849e-18	1.50662613658998e-17	6.98644705619286e-18	1.85924075507239e-18	1.60962868043847e-17	1.22516748053789e-17	1.72087960074786e-17	1.07920467212818e-16
2008005	19	1.07973462058371e-16	2.44878040268771e-17	4.84549540708613e-18	2.6419112961701e-17	2.72310174992512e-17	2.04459453025793e-17	1.46310552357134e-17	4.72586012138345e-17	1.95700007189084e-17	2.72643273884886e-17	7.73123150921886e-19	2.84620640530084e-18	1.55369845432639e-17	7.7264988917473e-18	2.48871357984038e-18	1.63084123402189e-17	1.29270729410158e-17	1.73054846707246e-17	1.10216059504647e-16
2008005	20	1.079244194392e-16	2.75429430140026e-17	3.40129625649745e-18	2.44598804676378e-17	2.82032670805434e-17	1.87346827688832e-17	1.98907609128607e-17	6.46823193473552e-17	1.99028704943117e-17	5.97658133577564e-17	8.5182874091451e-19	3.12010270739811e-18	1.5869895186964e-17	8.47946772671969e-18	4.14629115619217e-18	1.69073655824703e-17	1.35328979084292e-17	1.75543205269559e-17	1.12036245958867e-16
2008005	21	1.0177075754092e-16	2.96722784083844e-17	2.08146141766812e-18	2.25728712746604e-17	3.21625169812838e-17	1.80097734932251e-17	3.09955626387224e-17	7.22544648992496e-17	2.04421170158563e-17	7.71182416655244e-17	9.56160783700825e-19	3.35286766348018e-18	1.66202967163022e-17	9.15758662672308e-18	5.99823560893355e-18	1.84543161487596e-17	1.37693742294558e-17	1.80656000867671e-17	1.14253445247631e-16
2008005	22	6.56107203051414e-17	3.17221060120598e-17	1.55355639021492e-18	2.11913137916316e-17	3.71111990464921e-17	1.80053062235534e-17	4.37000719685625e-17	7.48812958578233e-17	1.86653697545621e-17	8.00867085906803e-17	1.12241457009674e-18	3.54340692951705e-18	1.79132397364235e-17	9.61370219979867e-18	8.08617229169619e-18	1.8756572222732e-17	1.41546733533694e-17	1.86671102988641e-17	1.07651666000331e-16
2008005	23	9.17455230854097e-17	3.44382712686638e-17	1.5934072882618e-18	2.0188097400206e-17	4.21360688814728e-17	1.83301868297138e-17	5.17613850693756e-17	7.87505516175462e-17	2.08942501207458e-17	7.92688222456458e-17	1.3647845240356e-18	3.70723685480899e-18	2.01320628994693e-17	9.80521861331931e-18	9.72193763672102e-18	1.87553025638482e-17	1.47741039428487e-17	1.92568995146242e-17	9.45411623086484e-17
2008006	0	1.08445027816484e-16	3.66759614158223e-17	2.06283506721227e-18	1.95255646355676e-17	4.50750553511948e-17	1.89057499321504e-17	5.57936561211734e-17	8.274494656479e-17	3.10056054191449e-17	7.77757250090402e-17	1.63365163477894e-18	3.84925898999524e-18	2.20938070494259e-17	9.89557363983222e-18	1.07838087469902e-17	1.88269346134516e-17	1.53727180786119e-17	1.98323303958479e-17	8.88961851483367e-17
2008006	1	1.07488815782e-16	3.82587209053449e-17	2.49004220233292e-18	1.92260542605334e-17	4.72618168105043e-17	1.95334740712984e-17	5.83739542978591e-17	8.74002044451394e-17	4.8324654692679e-17	7.7312483280037e-17	1.90641235225246e-18	3.98186041393319e-18	2.38290475558552e-17	1.00530181277872e-17	1.11774514930538e-17	1.92906910064009e-17	1.57771993056479e-17	2.11109169175379e-17	8.42629269369899e-17
2008006	2	1.02849658911393e-16	3.9049382578829e-17	2.49875513292754e-18	1.91584261132212e-17	4.8234449320423e-17	2.00054271641907e-17	6.21368993326335e-17	8.25336759547015e-17	5.38939868914841e-17	9.57234075130182e-17	2.21710424855488e-18	3.99550625772585e-18	2.47397150614266e-17	1.03238358327756e-17	1.16741355815392e-17	1.96568953597369e-17	1.57760325586323e-17	2.64294134791647e-17	7.8883955515806e-17
2008006	3	1.04099683567696e-16	3.88167752520917e-17	1.69479759513093e-18	1.93376525912611e-17	4.77476230204806e-17	2.0147527986265e-17	6.66457264106163e-17	8.00672991506491e-17	6.04311772756667e-17	7.46265578843031e-17	2.51029887013645e-18	3.93138075320428e-18	2.45827276939057e-17	1.0624548910116e-17	1.22227706833276e-17	2.02206546173995e-17	1.57043234735094e-17	3.69154184004535e-17	7.38809301125022e-17
2008006	4	7.19403557725114e-17	3.77905400566731e-17	1.61953073609299e-18	1.96026384176592e-17	4.72056826676079e-17	2.01688706757376e-17	7.0953666676531e-17	7.14573299954182e-17	6.33164569071598e-17	7.63749316023943e-17	2.5105883353123e-18	3.82379994440289e-18	2.88315909676192e-17	1.0965866366883e-17	1.25648577679625e-17	2.09839042196535e-17	1.58072153244026e-17	5.0165112949916e-17	7.14449601171919e-17
2008006	5	8.07404936765221e-17	3.61724371751489e-17	2.32056802941338e-18	1.95996106094563e-17	4.73561389191558e-17	2.02250314108475e-17	7.42754329496669e-17	6.68479214637925e-17	5.75309264180085e-17	8.50283774799726e-17	2.48154034423572e-18	3.66165853226565e-18	2.98794526053541e-17	1.13009603928202e-17	1.27263073509064e-17	2.02638851491997e-17	1.65645897135013e-17	8.40826610330593e-17	1.10074582971749e-16
2008006	6	8.83296243595881e-17	3.4224917586504e-17	2.69375999591906e-18	1.94190414778696e-17	4.77027230685518e-17	2.03437053695471e-17	7.56404775030376e-17	6.48453533279998e-17	9.02253745987046e-17	8.09879580013916e-17	2.87535497406135e-18	3.48894689548817e-18	3.03622636541442e-17	1.1539144712459e-17	1.29108251164385e-17	2.02076392357719e-17	1.77727162284957e-17	6.42974627228353e-17	9.03855344647218e-17
2008006	7	9.55390093147845e-17	3.21677154230336e-17	2.26942015822027e-18	1.90695179049526e-17	4.76271366532375e-17	2.03671293237034e-17	7.40261390757457e-17	6.36012753768607e-17	1.09257045232051e-16	7.43920789405745e-17	3.2900861870434e-18	3.28999233067477e-18	2.70633484619389e-17	1.16777846968178e-17	1.29198516770247e-17	2.06808579327422e-17	1.88873108121494e-17	1.09688705578929e-19	1.14572708838799e-16
2008006	8	9.98320224256757e-17	3.06561096196954e-17	1.89341922640624e-18	1.85687104453891e-17	4.71934539411842e-17	2.02450559917229e-17	7.033356226805e-17	6.25876536457704e-17	1.09524211800721e-16	7.49797274172329e-17	3.7068287198032e-18	3.02088134070538e-18	2.51989467169692e-17	1.17867233271821e-17	1.29941348085378e-17	2.33576430391252e-17	1.98089602389928e-17	5.0752870643436e-17	1.1610268021079e-16
2008006	9	1.018831487332e-16	2.98403741350933e-17	1.77831674419187e-18	1.79894202645606e-17	4.65755901275068e-17	1.9604221698308e-17	6.69710516567996e-17	6.20811353782068e-17	1.10346174685216e-16	7.72381589515854e-17	4.19995704134884e-18	2.73287740734449e-18	2.38658511318645e-17	1.18697298416932e-17	1.373043957722e-17	2.46946934204887e-17	2.01476420742831e-17	8.41646703502279e-17	9.94359697804637e-17
2008006	10	1.04229410905279e-16	2.94153969725413e-17	1.77210547424986e-18	1.74006484219871e-17	4.64456011706822e-17	1.8078612036339e-17	6.47715167237503e-17	6.18393550957054e-17	1.11299438177252e-16	8.10638431100621e-17	4.72654947114701e-18	2.45902670982707e-18	2.29624628066071e-17	1.19697180306889e-17	1.32448856088344e-17	2.43476298179702e-17	2.00756484368855e-17	9.56265068383622e-17	8.73197705670418e-17
2008006	11	1.09442521746861e-16	3.15358510284889e-17	1.8902664710296e-18	1.6882510520216e-17	4.62897354955419e-17	1.60952278385706e-17	6.38646899427358e-17	6.16588444281657e-17	7.49700812846934e-17	8.28993062475037e-17	5.05849007302133e-18	2.24381839728318e-18	2.23318773822649e-17	1.2105633923457e-17	1.22010888520245e-17	2.43466363718975e-17	1.93772216577473e-17	7.55047482922549e-17	8.83398238904337e-17
2008006	12	9.93418859374258e-17	4.23401838348553e-17	2.41078101930977e-18	1.64677896867295e-17	4.62455088942883e-17	1.41222431510742e-17	6.38866509444951e-17	6.1591401836043e-17	7.00309670492165e-17	7.89535617843715e-17	5.18494937861754e-18	2.05527887136917e-18	2.29264472646415e-17	1.22531566723376e-17	1.15564989691074e-17	2.50596933073274e-17	1.91670496345386e-17	7.76289690802375e-17	8.01051023570115e-17
2008006	13	8.17126780228386e-17	5.11461109669728e-17	3.59175178534344e-18	1.61631330254424e-17	4.67692965553219e-17	1.25849859904328e-17	6.43154551157379e-17	6.16968035520404e-17	6.69126431146851e-17	7.11270871949497e-17	5.3563984967998e-18	1.84904950745962e-18	2.41506463905539e-17	1.23232570856303e-17	1.10965596224778e-17	2.43405967563792e-17	1.9066710305968e-17	7.3927580015736e-17	7.34372125737763e-17
2008006	14	6.87423119633899e-17	5.33331601874476e-17	5.77012501369253e-18	1.59809636998903e-17	4.73710809871351e-17	1.23186627888123e-17	6.51531404077151e-17	6.22307499474714e-17	6.47601016255987e-17	6.26911083753115e-17	5.64407711828158e-18	1.68560755698563e-18	2.37485187063118e-17	1.24104919969634e-17	9.00639900043755e-18	2.31753821142379e-17	1.89294678596294e-17	1.13080495334216e-16	7.0773625965276e-17
2008006	15	5.91094206782962e-17	5.24084813365527e-17	7.95080082155801e-18	1.60675312592685e-17	4.7959692295592e-17	1.29157608325646e-17	6.62958892146034e-17	6.28497861669792e-17	6.43974214035761e-17	5.84337833795443e-17	6.00308004841037e-18	1.56442617686044e-18	2.40927443299216e-17	1.25298967856679e-17	9.55424080301297e-18	2.19135520391833e-17	1.86700312740687e-17	1.13558381467527e-16	6.87471636432821e-17
2008006	16	5.13682391913367e-17	5.12127861198264e-17	9.06188913835357e-18	1.67088113550425e-17	5.00936364702031e-17	1.38221968385922e-17	6.70646393394679e-17	6.33951226975909e-17	7.92573163712273e-17	5.4878463340194e-17	6.37463599762278e-18	1.437437741925e-18	2.9784054035952e-17	1.27328193199481e-17	1.25226161267844e-17	2.0701485499477e-17	1.8285591716418e-17	1.14432749751936e-16	6.10144004449615e-17
2008006	17	4.50148231370039e-17	4.97770174041193e-17	9.12160368957298e-18	1.98316088201895e-17	5.16841800201991e-17	1.52495802512966e-17	6.6995082778105e-17	6.34093854251857e-17	1.20524955139658e-16	5.68845728256011e-17	6.70185012567665e-18	1.32431608143816e-18	4.08491460521341e-17	1.30836392581962e-17	1.43669946167251e-17	1.95166719047393e-17	1.78815611768971e-17	1.15225310654872e-16	5.97066640316482e-17
2008006	18	4.06496633691048e-17	4.86185845501927e-17	8.83983950430748e-18	2.71485779992288e-17	5.34562431551734e-17	1.79185291157354e-17	6.49609108404462e-17	6.47591430246224e-17	9.72224015326714e-17	5.98470807275499e-17	6.92329965806514e-18	1.22499317698716e-18	5.10046996123873e-17	1.36589094709442e-17	1.46567446578603e-17	1.82428149825015e-17	1.75568784763182e-17	1.1526114824534e-16	5.87578934144809e-17
2008006	19	3.77242087461503e-17	4.8376010458564e-17	8.33904952827828e-18	3.77596729749034e-17	5.6363568818502e-17	2.17315262127318e-17	6.1088595703607e-17	6.5993312761725e-17	7.85191852024834e-17	6.16770759718583e-17	7.09200300004155e-18	1.14451687402982e-18	5.37705724683676e-17	1.43287268062334e-17	1.44289047320702e-17	1.67584509307256e-17	1.76080840061944e-17	7.64834720510055e-17	5.84615092984266e-17
2008006	20	3.5719919645608e-17	4.87983391790426e-17	7.55378187111614e-18	4.97484095951207e-17	5.89555376524326e-17	2.55736773538266e-17	5.67073923289262e-17	6.66393388506e-17	6.87931859969127e-17	6.11239367919455e-17	7.1659120664425e-18	1.1458122959556e-18	4.89464567771227e-17	1.56095003500484e-17	1.44055081746789e-17	1.52838911904664e-17	1.88617898328968e-17	7.51954479124895e-17	5.84184952554047e-17
2008006	21	3.44905744028673e-17	4.98819492397939e-17	6.91581262762797e-18	6.5489105560998e-17	6.15087258212984e-17	2.80386052236018e-17	5.28072393274005e-17	6.68332799781253e-17	6.48963960408251e-17	5.99556427534124e-17	6.98490029400754e-18	1.26294770176131e-18	4.09865089317363e-17	1.82214143006916e-17	1.47490042262423e-17	1.50909166455789e-17	2.23125773173197e-17	6.96895428541194e-17	5.80803910133573e-17
2008006	22	3.40903293869711e-17	5.21142882799454e-17	6.10915528886342e-18	6.94574685707125e-17	6.37629272799246e-17	2.89966463924426e-17	4.99061557839913e-17	6.50244544880913e-17	6.32059814001908e-17	5.83991867636439e-17	6.46886968267563e-18	1.42076854658237e-18	3.52249789787623e-17	2.26028714922589e-17	1.53524652008037e-17	1.86252806231261e-17	2.4990239008871e-17	6.45021474485648e-17	5.73159871471089e-17
2008006	23	3.4296110108591e-17	5.60326414588292e-17	4.94407411861745e-18	6.75474671028732e-17	6.60456946645018e-17	2.89473002909021e-17	4.78148252151527e-17	6.30062948084519e-17	6.13689601864268e-17	5.60125478893949e-17	5.87708756336272e-18	1.51141124422242e-18	3.14376783411754e-17	2.86129773483736e-17	1.65205330919159e-17	2.33763458368008e-17	2.96955518368576e-17	6.16865151291304e-17	5.62313078999397e-17
2008007	0	3.52684275062621e-17	6.37929272009799e-17	3.81082046956491e-18	5.98647002720582e-17	6.77575608816119e-17	2.86198168195122e-17	4.5903255319448e-17	6.04270682326318e-17	5.89067394320101e-17	5.28564071241762e-17	5.47260365130515e-18	1.50595224978245e-18	2.91685643863499e-17	3.56830261356721e-17	1.81276791165388e-17	2.74936373959544e-17	3.22576103162853e-17	6.03437490909925e-17	5.46705989527795e-17
2008007	1	3.76877525664792e-17	6.5289206517142e-17	2.96130149017907e-18	5.45375857699191e-17	6.98483768561206e-17	2.85489262301835e-17	4.38612391341639e-17	5.65690397926032e-17	5.67227550938642e-17	4.84725861177552e-17	5.23612926356975e-18	1.49643682097608e-18	2.75765581451626e-17	4.25091480288802e-17	2.0084696304623e-17	3.13439632997183e-17	3.33226660745118e-17	5.94685201327691e-17	5.30861969660474e-17
2008007	2	4.17268766244429e-17	6.38090856750032e-17	2.47656471908618e-18	5.09300169604837e-17	7.04922584374902e-17	2.88644085524628e-17	4.17098744245788e-17	5.33310478627923e-17	5.43436781306285e-17	4.33946160555065e-17	5.0643785315145e-18	1.46310300018468e-18	3.10438201494491e-17	4.70895722817301e-17	2.16121692237378e-17	3.29478662129155e-17	3.42108140916098e-17	5.84240256155646e-17	5.82489425293286e-17
2008007	3	4.61920984744887e-17	6.13332499062647e-17	6.17358270054835e-18	4.91035851180229e-17	6.96782998553029e-17	2.90938122398056e-17	3.97243184534414e-17	5.12676618003432e-17	5.16372361927493e-17	3.87895024277581e-17	4.97148623919232e-18	1.49252351631037e-18	1.07655654290486e-16	4.82184296812382e-17	2.22531603186094e-17	3.35677594662534e-17	3.59150367258807e-17	5.7535919249933e-17	5.79483720548874e-17
2008007	4	4.94386007077465e-17	5.88864098188408e-17	4.7569733355037e-17	4.99975529412442e-17	6.69285147905629e-17	2.86512048193364e-17	3.82824951118692e-17	5.12072986719754e-17	5.02782744898721e-17	3.52997312155578e-17	4.89054887638079e-18	1.58418611935336e-18	1.01462203221324e-16	4.74162954412323e-17	2.1679265764119e-17	3.36212083856882e-17	3.87675383824622e-17	5.54392401007873e-17	8.22293128227528e-17
2008007	5	5.23828844264419e-17	5.654494625279e-17	2.85718807474929e-17	5.95196209831584e-17	6.32841211205916e-17	2.89185277867291e-17	3.74647698294815e-17	5.25467655593068e-17	5.16363720206567e-17	3.3647799022422e-17	4.77463895199409e-18	1.6651643571565e-18	9.01383512921296e-17	4.61316445377401e-17	2.02054369777047e-17	3.3285188510301e-17	4.30650465203394e-17	5.23596321260282e-17	3.71437731989099e-17
2008007	6	5.45471760921279e-17	5.51219844563043e-17	3.47913337342333e-17	6.04350844331785e-17	6.2776994042713e-17	3.11737580699322e-17	3.73270231820621e-17	5.44651322720523e-17	5.33579281455549e-17	3.41458846274258e-17	4.66001796533966e-18	1.8946612997684e-18	7.62178295253407e-17	4.49710641445244e-17	1.87199061199036e-17	3.42361916134744e-17	4.63381511406734e-17	5.07213327327284e-17	1.89242612666773e-17
2008007	7	5.48964814186859e-17	5.3616636837547e-17	1.06296922970394e-16	5.91963165424867e-17	6.31393073129659e-17	3.69407437051112e-17	3.78666668119593e-17	5.56202844000412e-17	5.29141042372405e-17	3.58505137606635e-17	4.59082695932276e-18	2.12026812452915e-18	6.8915133897276e-17	4.43769064272603e-17	1.76743885421815e-17	3.67620657019866e-17	4.86491286669452e-17	5.15339304806115e-17	1.0759665689745e-16
2008007	8	5.32433570300086e-17	5.01685552542187e-17	1.05483241788695e-16	5.61892688243577e-17	6.5074039918716e-17	4.37294410116914e-17	3.92229690546088e-17	5.64839982361323e-17	5.26101183139906e-17	3.8226197507807e-17	4.47967302392384e-18	2.22564769947581e-18	6.36688948468902e-17	4.39455084895546e-17	1.71796063782746e-17	5.1836844041619e-17	4.97989697097394e-17	5.55531950410762e-17	1.08545148358155e-16
2008007	9	5.03546428602534e-17	4.84092540362021e-17	6.81059615186055e-17	5.2685187873727e-17	6.42910640067219e-17	5.45287537104289e-17	4.20239102670022e-17	5.65958191165953e-17	5.26929266984978e-17	4.39829455619053e-17	4.33256717096826e-18	2.26393286952145e-18	5.69429361515322e-17	4.45188159965714e-17	1.7332400051907e-17	5.42652625087326e-17	5.02048740275342e-17	5.87353787139064e-17	8.73495955018076e-17
2008007	10	4.90884336769613e-17	4.39336923030958e-17	6.08488612523221e-17	4.90019329975628e-17	6.12417869619315e-17	5.54417055497237e-17	4.73883727316213e-17	5.57356619912526e-17	5.52702995529068e-17	4.52901625616712e-17	4.22619458160277e-18	2.2438264188297e-18	2.30699457839888e-17	4.45680141975689e-17	1.81229007689631e-17	5.47883500554111e-17	5.08197916457275e-17	5.48049112848692e-17	4.3162250033736e-17
2008007	11	4.83368741561653e-17	2.87107292686969e-17	6.89346011894464e-17	4.83340609897682e-17	5.68234363152291e-17	5.52739188304778e-17	4.98110973341991e-17	5.37229658198169e-17	5.78941376497932e-17	4.64139509447128e-17	4.07905221363151e-18	2.17607249327096e-18	1.66197414741929e-17	3.87044935169172e-17	1.91386569744893e-17	5.65122404034233e-17	5.26510545591706e-17	5.04383445882978e-17	3.5516128886913e-17
2008007	12	4.59716278253439e-17	4.0796634116129e-17	9.0155084549939e-17	4.79125781794382e-17	5.1819956306622e-17	3.95892399333377e-17	5.08792418653416e-17	5.15279497925227e-17	6.05015120604148e-17	4.6495423356202e-17	3.94315748092822e-18	2.0893933334985e-18	2.28619716386046e-17	3.56092309365462e-17	2.05512946861722e-17	5.67432714171814e-17	5.52388874216131e-17	5.15513770002419e-17	3.08007433199997e-17
2008007	13	4.28943165926494e-17	5.05215942909732e-17	1.06387409947278e-16	4.47676103693174e-17	4.94379925994979e-17	4.05713586215646e-17	5.06541154535837e-17	4.66608162816162e-17	6.12214291195343e-17	4.77027412264451e-17	3.86881353622062e-18	1.77287162841269e-18	3.29446861012161e-17	3.41376439713352e-17	2.18576472113241e-17	5.84923970040299e-17	5.67669281837236e-17	5.41293941809002e-17	3.59924089569995e-17
2008007	14	4.07474015701959e-17	7.42164077705858e-17	1.06189448982764e-16	3.94480275717843e-17	4.8229169029155e-17	5.82843481531064e-17	5.12431885311323e-17	4.07422673863227e-17	6.09101710850407e-17	4.96109182180144e-17	3.82355352507031e-18	1.63577595597697e-18	3.75924992713737e-17	3.70518685611698e-17	2.33480855698925e-17	5.60208238661776e-17	5.86049068691534e-17	5.58968744734277e-17	5.46810705774441e-17
2008007	15	3.98184619357111e-17	5.3315644769257e-17	1.05662871750752e-16	4.66228878719651e-17	4.56942217659124e-17	1.06268182702078e-16	5.27030308918973e-17	3.21273404815843e-17	5.96217135426011e-17	5.06427666867319e-17	3.85068844805996e-18	1.61959394386835e-18	4.28453877764689e-17	4.34126706726181e-17	2.50031782119538e-17	4.96462776906072e-17	5.89744756144017e-17	5.57183427973569e-17	7.61655015326469e-17
2008007	16	3.99416591863398e-17	2.80501385126236e-17	1.05341481102151e-16	5.86037096363271e-17	4.14881209322675e-17	7.04494468075837e-17	5.37600263930694e-17	2.24721703247692e-17	5.84734780914966e-17	5.12724641620853e-17	3.97681340290667e-18	1.8116397864721e-18	4.28639630480101e-17	4.2834092694395e-17	2.57127229063499e-17	4.48359579896582e-17	6.09396284472859e-17	5.53626417059649e-17	7.92424533452545e-17
2008007	17	4.03552839896373e-17	1.47250063810662e-17	5.7501179239178e-17	5.77104365957407e-17	3.82259811194215e-17	6.1441535357727e-17	5.45462502020023e-17	2.25860455015691e-17	5.54621991601526e-17	5.18061075743071e-17	4.17071224584127e-18	1.85403144703668e-18	4.06284235359914e-17	4.19339229299783e-17	2.66485104188278e-17	3.74422626994002e-17	6.17582280144811e-17	5.5039941696286e-17	6.95369980228974e-17
2008007	18	4.13977048450547e-17	1.42168572740459e-17	5.27690262442884e-17	5.46585465183893e-17	3.4003557950173e-17	5.48159388118015e-17	5.44795803197619e-17	2.57823912925325e-17	5.34098571925291e-17	5.21023074983863e-17	4.33932935308207e-18	1.75342651446507e-18	3.90396350293122e-17	4.54679660447756e-17	2.77142337355047e-17	4.7041918645172e-17	6.15986294706077e-17	5.47044551909602e-17	9.43865643589607e-17
2008007	19	3.81669608023481e-17	1.33401099415643e-17	5.3340703680306e-17	4.40543631481506e-17	3.01319533331781e-17	4.65549943033238e-17	5.3243781954558e-17	3.13640018823665e-17	5.16661565784008e-17	5.21077241625098e-17	5.37214269120233e-18	1.76906926789373e-18	3.92028470031084e-17	4.40555576401329e-17	2.87717389525835e-17	5.23396384871117e-17	5.95927590067586e-17	5.31877177459368e-17	1.05956158867109e-16
2008007	20	6.85221927895242e-17	1.84702022101766e-17	5.63824918761857e-17	2.95698531644263e-17	2.42362702853123e-17	4.61727155929189e-17	5.10470091988072e-17	3.75101098739094e-17	4.82241939911094e-17	5.17420111920338e-17	5.67712038057679e-18	1.78135524231564e-18	3.91717948405805e-17	4.42675874581076e-17	2.93557284996128e-17	5.32494551380428e-17	5.30806042492134e-17	5.06342915824513e-17	1.0698979944389e-16
2008007	21	1.18786331151331e-19	3.33304543540026e-17	5.95549440076403e-17	1.68943256182408e-17	2.38092109489447e-17	4.96990843171685e-17	4.8490172582868e-17	4.37390869132146e-17	4.55703664158378e-17	5.13172853541691e-17	6.21123892754117e-18	1.78180744327097e-18	3.89548216635822e-17	4.57376968925016e-17	2.96338294940624e-17	5.22139989176451e-17	4.56829392892159e-17	4.83914224386697e-17	1.07148485734835e-16
2008007	22	7.59915460852671e-17	5.24019721792993e-17	6.33868262261148e-17	1.58027556760174e-17	3.32457027801367e-17	5.36715007841097e-17	4.66489578095673e-17	4.67792011341919e-17	4.32500019861347e-17	5.1053906009027e-17	6.82883813126809e-18	1.79639427086381e-18	3.92214564328822e-17	4.73525337451192e-17	3.13338049563225e-17	5.21710923744677e-17	4.17342086539654e-17	4.74294766207345e-17	7.5400283747176e-17
2008007	23	9.64092372645435e-17	6.5480246498097e-17	6.38581259379449e-17	2.55211962712327e-17	4.18990035759598e-17	5.62031112282284e-17	4.53487224100108e-17	5.67536920519704e-17	4.13023579207813e-17	5.9741073413821e-17	7.39968501507313e-18	1.81940438629151e-18	3.95453610178608e-17	4.858956440758e-17	3.82730508016567e-17	5.36453872212067e-17	4.16349368593022e-17	4.64707654680093e-17	8.03099177004738e-17
2008008	0	1.08947340244104e-16	7.03095272931993e-17	6.03540750849307e-17	3.01507507161823e-17	4.93200477751706e-17	6.15482769021776e-17	4.49742988302328e-17	7.32245095792297e-17	3.99949211294703e-17	9.76817919656171e-17	7.76110729007675e-18	1.88395531958485e-18	4.01306807809549e-17	4.90628732303217e-17	3.62939025732929e-17	5.65000903709496e-17	4.09262355312796e-17	4.57254179053086e-17	7.77251078109963e-17
2008008	1	1.08370968037298e-16	1.10209184532677e-16	5.90020188021442e-17	4.41183438986319e-17	4.75381342904568e-17	7.38013947867381e-17	5.25864276430881e-17	8.0358631348995e-17	3.91766345454953e-17	8.5951398232053e-17	8.53570106246505e-18	1.94282157176739e-18	4.08830264363129e-17	4.92457811780297e-17	3.9432373918051e-17	5.67586050207299e-17	3.85103573570595e-17	4.54753033868346e-17	7.21287510500409e-17
2008008	2	1.07924393945985e-16	8.88097758483158e-17	5.98084614398689e-17	4.29967857286117e-17	5.20081359513688e-17	8.5325475151506e-17	6.32560379348066e-17	8.3251744868236e-17	3.87399342894418e-17	8.2392813688924e-17	1.05328087218036e-17	2.0168030141591e-18	4.14516987606031e-17	4.93206982027005e-17	4.23717412719405e-17	5.64891849247301e-17	3.40611035102291e-17	4.52437889948415e-17	6.65476036576712e-17
2008008	3	8.90264965577434e-17	5.32090974276416e-17	6.10660061588015e-17	4.11944939053807e-17	6.74178541002496e-17	9.71561337822912e-17	7.25176595477375e-17	8.316681222739e-17	3.90361939201217e-17	8.68762101373323e-17	1.18711622924006e-17	2.16820517515123e-18	4.11065655362305e-17	4.95043268149057e-17	4.22739645680926e-17	5.80673115573636e-17	2.90775168213111e-17	4.47881386253589e-17	6.29106152314024e-17
2008008	4	9.10105850928381e-17	5.08714224350953e-17	6.39543927298462e-17	2.14009471347601e-17	7.02825499024306e-17	6.02524518143698e-17	7.14409406045548e-17	8.47565078107935e-17	4.24608323718974e-17	8.89898419565888e-17	1.30326266904339e-17	2.51976703280368e-18	4.04368865130783e-17	4.98173338614991e-17	4.05027864455895e-17	6.45526369912302e-17	3.04828725225585e-17	4.39857098859369e-17	5.87929227581409e-17
2008008	5	8.76096361503149e-17	4.95925550600578e-17	6.49963970347781e-17	2.73114020350386e-17	7.34476109786154e-17	4.19466139714529e-17	7.38965655268073e-17	8.19380515369121e-17	4.73853489357466e-17	7.48340402635747e-17	1.45430210764299e-17	2.72471035147626e-18	3.99723136418773e-17	5.01336146445427e-17	3.46510494051378e-17	6.79443581033956e-17	3.30273981238839e-17	4.34038627054779e-17	5.84384429839188e-17
2008008	6	8.34836389209762e-17	5.7464300311563e-17	6.66076009652241e-17	4.99022085831204e-17	7.61855663007921e-17	4.14675172251689e-17	7.32428231142377e-17	8.07243227745078e-17	5.34254888881465e-17	9.9679842923704e-17	1.60986586951214e-17	2.7275515584638e-18	3.98324174701643e-17	5.03043061785602e-17	2.77048047598945e-17	5.90421743005412e-17	2.74477184667455e-17	4.54416448899426e-17	5.94393975414102e-17
2008008	7	8.30086751669554e-17	6.36845908864831e-17	6.92420986847146e-17	5.22779573204847e-17	7.52724881525737e-17	4.51441803981455e-17	7.04981456170903e-17	7.98135685889941e-17	6.25759561359768e-17	8.92890497395235e-17	1.78267872455513e-17	2.73282962253844e-18	4.12506262326634e-17	5.03299055102096e-17	2.52540316014313e-17	5.03687608186291e-17	2.18955370888438e-17	4.79562299993699e-17	6.02341295415648e-17
2008008	8	7.47787551933658e-17	6.10414194226709e-17	6.66927370814436e-17	6.48885115447172e-17	7.43784960772114e-17	4.88983678030756e-17	7.45134279773766e-17	7.94323268082209e-17	7.43881373883111e-17	1.07282290720143e-16	1.70676852698325e-17	2.81118379949593e-18	4.28680901232627e-17	5.01515108850641e-17	2.86984899177881e-17	4.37315274005308e-17	2.69109021155735e-17	4.86892290200796e-17	5.95131828859817e-17
2008008	9	6.27231372748513e-17	5.76556301855399e-17	6.48451665572756e-17	7.0169000956126e-17	7.51433490774753e-17	5.15490634383744e-17	9.47881882161926e-17	7.64290560340554e-17	8.26996688152112e-17	1.07871805953035e-16	1.63320022421365e-17	2.92426187896323e-18	4.42897206944151e-17	5.00725324819772e-17	3.46305497596391e-17	3.95544219746523e-17	2.78740200325299e-17	5.42364797264171e-17	5.95290021606987e-17
2008008	10	5.54168081825937e-17	5.60052498277009e-17	6.70097721934078e-17	6.84796302426306e-17	7.50971537436608e-17	5.26127311444284e-17	8.27793566556951e-17	6.80873565373561e-17	8.55439915526532e-17	9.4507630309356e-17	1.63544816355094e-17	2.9011860026576e-18	4.61984132905593e-17	5.05695743249051e-17	3.86435435159273e-17	3.84491466596618e-17	6.95836948728484e-17	6.1371070983133e-17	5.88134953700065e-17
2008008	11	5.23995151617505e-17	5.6319235107275e-17	7.33059583319752e-17	6.15947113697187e-17	6.95977643447644e-17	5.2095934033174e-17	7.77163333563423e-17	5.24514495137031e-17	8.4972767684099e-17	7.68573332188091e-17	1.73144122714048e-17	2.78658758103582e-18	4.89825633119637e-17	5.06496105686761e-17	4.15239809751821e-17	4.02870876649308e-17	6.87131766393932e-17	7.2258413459878e-17	6.28528131386957e-17
2008008	12	4.66919960256904e-17	5.69179139507533e-17	7.75534499278469e-17	5.55662140684939e-17	5.86400830282775e-17	5.18166945728338e-17	7.05757770583691e-17	3.70475991515089e-17	8.35257802696675e-17	7.33423938009514e-17	1.86952869132399e-17	2.69926584618109e-18	5.37254995507051e-17	4.99282494880732e-17	4.46321449680632e-17	4.4299138202244e-17	6.57120677735719e-17	7.7328705157016e-17	6.0316618853828e-17
2008008	13	4.12308246407456e-17	5.57525990385273e-17	7.66085665847438e-17	5.3050517102037e-17	4.87408265425378e-17	5.23944668970618e-17	6.36538512211518e-17	2.83179440991261e-17	8.53486140573377e-17	7.65075807796208e-17	2.01841780143564e-17	2.556808353866e-18	6.04544092004739e-17	4.8897480937634e-17	4.78240376738411e-17	4.65517749969075e-17	6.86763257794229e-17	8.03081453210453e-17	5.2144665175997e-17
2008008	14	3.99129919044469e-17	5.35502715462673e-17	7.43118003167599e-17	5.2990448750992e-17	4.21718970293422e-17	5.29889119328987e-17	5.8986996555477e-17	2.72622574359106e-17	1.1189608582535e-16	8.1460503335893e-17	2.14139406306694e-17	2.3349618547621e-18	6.28689330075211e-17	4.77599041634293e-17	4.88213417034408e-17	4.59611486752176e-17	6.72719819896949e-17	8.25490460739008e-17	4.55171616046259e-17
2008008	15	4.10174410318765e-17	5.15916543724754e-17	7.10612691695444e-17	5.26638480830613e-17	3.66368719040417e-17	5.33294806848865e-17	6.01225845740369e-17	3.02985340640482e-17	7.82801133852613e-17	1.10954126630922e-16	2.27198546193688e-17	2.16656731160254e-18	6.49471529765189e-17	4.70819834149967e-17	4.8680484254905e-17	4.34045843112355e-17	8.94333248415475e-17	1.14032866134705e-16	4.21009494701211e-17
2008008	16	4.32967429254915e-17	5.00282635777395e-17	6.7105504983135e-17	5.14774604567838e-17	3.22398746282282e-17	5.32722320030204e-17	6.91648017674605e-17	3.45598146387751e-17	7.04805083333184e-17	9.74371201567061e-17	2.40329656606646e-17	2.20331358797918e-18	7.41750593980152e-17	4.65827210467122e-17	4.59055646827941e-17	4.31341084906344e-17	6.31532634726693e-17	1.14807031668593e-16	4.06907282515419e-17
2008008	17	4.86994134320075e-17	4.72797957856848e-17	6.4947635990891e-17	4.98574779387271e-17	3.13587255067996e-17	5.19552734086883e-17	7.47851154902892e-17	3.85295245593694e-17	6.8283125393406e-17	7.9931871467585e-17	2.54032998602434e-17	2.48089339158574e-18	7.38995769150323e-17	4.67178076046879e-17	4.18253458309343e-17	4.3839030431611e-17	5.88558660410374e-17	8.64518690378369e-17	4.08372135580112e-17
2008008	18	5.21122304326714e-17	4.63170026311143e-17	6.56880900046286e-17	4.88955515053834e-17	3.34749808126258e-17	4.82582221788665e-17	7.56820607815962e-17	4.06296206360468e-17	7.449219145433e-17	6.78977006387873e-17	2.64709051221604e-17	3.22586841916206e-18	7.85368901558595e-17	4.78759465008004e-17	3.86782324396168e-17	4.47955043418819e-17	5.56253687829722e-17	7.83296243793576e-17	4.23597447623884e-17
2008008	19	5.0131863308777e-17	4.5363929556748e-17	6.51104554417426e-17	4.88599468982932e-17	3.7523406017503e-17	4.31334464796354e-17	6.86834577229123e-17	3.79482580821792e-17	8.27177615963476e-17	4.21513287834548e-17	2.66121295202818e-17	4.54729561294396e-18	7.68297311822215e-17	5.08951831179144e-17	3.68589195511944e-17	4.57668914794566e-17	5.1759103243286e-17	7.35825134951097e-17	4.42949756369131e-17
2008008	20	4.1654135890869e-17	4.47169009563405e-17	6.49464026576755e-17	4.77174544638925e-17	4.13130386570162e-17	3.97261664129243e-17	4.58616907774508e-17	3.78704131984495e-17	8.78982949961215e-17	9.41078133197504e-18	2.63477409003769e-17	6.16009737043694e-18	7.15989901236563e-17	5.09720821319025e-17	3.64583941127228e-17	4.68447709182056e-17	4.68145501785739e-17	7.44113841681908e-17	4.66603631542002e-17
2008008	21	4.41114684583027e-17	4.62298186997148e-17	6.40735413208009e-17	4.6381067738641e-17	4.30742628566245e-17	3.77885102884311e-17	1.243000789198e-17	3.62556699744674e-17	7.41649053013765e-17	1.13939993320174e-17	2.59599808638725e-17	7.73814260064478e-18	6.61111129461524e-17	5.2254970146907e-17	3.74021155919227e-17	4.81599186040591e-17	4.32787090824536e-17	7.59364424136041e-17	4.74743646645277e-17
2008008	22	4.58474011976955e-17	5.08353342980451e-17	6.51325955710066e-17	2.54419657065389e-17	4.3100801139532e-17	3.7134515908356e-17	8.7645825901162e-18	3.12798210553969e-17	5.61982864838293e-17	4.30250952304734e-17	2.56189259795231e-17	9.02259232310411e-18	6.13888694908825e-17	5.13956717928777e-17	3.93800430425144e-17	5.08656144729465e-17	4.22377816382729e-17	7.27429927674262e-17	5.06398169373755e-17
2008008	23	4.54418458965989e-17	5.63011149150193e-17	6.49838785293587e-17	2.48791568392917e-17	4.08263164952131e-17	3.78575177274594e-17	1.67660798541563e-17	3.39027630278471e-17	2.75591172824702e-17	4.7357074340973e-17	2.52868722347415e-17	9.68461260530881e-18	5.60390121602366e-17	5.1412015787625e-17	4.18660218801418e-17	5.24837208643262e-17	4.16010064815063e-17	6.21386756423083e-17	5.33223563530676e-17
2008009	0	4.70344725013041e-17	6.34354798499516e-17	6.34585849027708e-17	3.59270325974441e-17	3.92805780779212e-17	3.95176965522661e-17	2.32692768735296e-17	4.00503904378659e-17	9.15373288597963e-18	4.53925599535684e-17	2.49657993962178e-17	9.63363612525279e-18	3.38240198656854e-17	5.17660079179116e-17	4.47330495218044e-17	5.20982459723043e-17	4.11251084558043e-17	3.24442979014665e-17	5.28761778778547e-17
2008009	1	4.98181916057715e-17	6.85129884321546e-17	6.27543070708624e-17	4.21774965954045e-17	4.04626060582011e-17	4.18562724572748e-17	2.79881701754789e-17	4.36189799701119e-17	1.91834367715023e-17	4.45405397805733e-17	2.62121482236915e-17	9.07635151237074e-18	1.53677896990409e-17	5.21956935482048e-17	4.53686592493894e-17	5.17547258678744e-17	4.10425530060992e-17	1.09976283416537e-17	5.11319553062377e-17
2008009	2	5.0120112437804e-17	6.87234304893534e-17	6.49336328974783e-17	4.99246885423359e-17	4.30936175543842e-17	4.38989249126241e-17	3.27528615198795e-17	4.75027689110955e-17	3.40377722929621e-17	4.66178045029565e-17	2.65051605703364e-17	8.88216137569261e-18	1.00029825687424e-17	5.33212049228493e-17	4.59167445928486e-17	5.13521960196636e-17	4.14376133174285e-17	1.1327356547325e-17	4.8983663932484e-17
2008009	3	4.98142877923601e-17	6.60281816830765e-17	6.20942559203272e-17	5.15124216303275e-17	4.73365508730137e-17	4.57459588566234e-17	3.70235179574312e-17	5.21630047029837e-17	4.01617887652377e-17	4.71170399836459e-17	2.61101516401991e-17	9.18224007873813e-18	8.81112744387093e-18	5.59228406947682e-17	4.7273610588976e-17	5.10523122288689e-17	4.03962022470073e-17	2.03630623049836e-17	4.72059166565198e-17
2008009	4	4.90917874988476e-17	6.60143896619048e-17	5.88909424983223e-17	5.15749355103132e-17	5.4013860160405e-17	4.91398222582571e-17	3.99878492224287e-17	5.72737629253164e-17	4.3927341482489e-17	4.54183545935544e-17	2.63585750132542e-17	9.80228031516171e-18	8.97911753252715e-18	6.13833103162609e-17	4.8456985018204e-17	5.11788248776519e-17	3.57119329452272e-17	3.10163633242371e-17	4.63797871721937e-17
2008009	5	4.73542955246997e-17	6.76455972479357e-17	5.48562911503459e-17	5.06700160272953e-17	6.10541390130916e-17	5.44507477171701e-17	4.13836302420021e-17	6.2184051078623e-17	4.63748005037198e-17	4.33711781137297e-17	2.77911024205468e-17	1.06944769863592e-17	1.95347734609666e-17	6.41464435089641e-17	4.85847261183648e-17	5.1196766713813e-17	3.21438989287102e-17	4.35004084630998e-17	4.10783387837786e-17
2008009	6	4.44373134795221e-17	6.71268626463094e-17	5.18710199356057e-17	4.90603332471985e-17	6.52284729286806e-17	5.63347930585595e-17	4.15689363428742e-17	6.46610008630087e-17	4.84352177138715e-17	4.02373821969789e-17	2.92743624009231e-17	1.16442203342541e-17	2.32993892888434e-17	5.90209183723781e-17	4.88699484284932e-17	5.08290058356837e-17	3.33293871956401e-17	4.60787484414474e-17	2.35797602635298e-17
2008009	7	3.85784793583373e-17	6.41693288105057e-17	5.02294612431895e-17	4.84356376978869e-17	6.53982606801241e-17	5.54400101128504e-17	4.10178633421654e-17	6.34854121233766e-17	4.98417758888441e-17	3.09181742163664e-17	3.0446168259202e-17	1.25366393138069e-17	1.0295678072117e-17	4.95901145315182e-17	4.78259067804357e-17	4.99814911508903e-17	3.77233824353149e-17	4.67421659790095e-17	2.68529686844612e-17
2008009	8	3.15447332559392e-17	6.04514551953258e-17	4.90964091264726e-17	5.38034852272591e-17	6.23748299149038e-17	5.55988848534675e-17	3.75168899298012e-17	5.95814876365664e-17	5.05985620374801e-17	2.37810185339099e-17	3.1953395513826e-17	1.3321389884412e-17	7.18937122992591e-18	3.520107466778e-17	4.54361360539663e-17	5.01039471838301e-17	4.19342702769807e-17	4.70596436581055e-17	4.12330864261775e-17
2008009	9	6.02838368279722e-17	5.723694179794e-17	4.5099172642406e-17	5.44606213128185e-17	5.9226164137895e-17	5.5214653290061e-17	2.69058967360519e-17	5.30330861322806e-17	4.95116994688847e-17	4.47800325579517e-17	3.48359270040667e-17	1.39748597004243e-17	1.61592392203113e-17	2.52438737381144e-17	5.13760486258388e-17	5.65702449997032e-17	4.60208825943203e-17	4.60750560541992e-17	6.36678673807292e-17
2008009	10	1.0831366963609e-16	5.34659252222435e-17	3.93837393445392e-17	5.44125955388493e-17	5.75624209920835e-17	5.58660021978772e-17	2.33287516437695e-17	4.58781264728997e-17	4.57948332877494e-17	1.07800767700109e-16	3.93276890022081e-17	1.47070502000926e-17	9.39108902144941e-17	2.23389625638494e-17	5.39545364668302e-17	5.66032111739606e-17	4.92652430930913e-17	4.26634311508341e-17	1.07143023902669e-16
2008009	11	9.90377381795983e-17	4.54651392832107e-17	3.6050661658243e-17	5.48206346878701e-17	5.61096360045541e-17	5.44182723823072e-17	4.7630519945838e-17	3.6428618365109e-17	3.91885121774535e-17	1.0010146591702e-16	4.38307626060281e-17	1.55495237788514e-17	1.00422225300132e-16	2.33908496517393e-17	5.36663958647516e-17	5.22123592072346e-17	5.13804814910268e-17	3.52692278381999e-17	1.06717985893481e-16
2008009	12	9.08395224496973e-17	3.44354745427601e-17	3.40813521990061e-17	5.40858372381779e-17	5.24950148432719e-17	5.12333147181261e-17	1.07219976555839e-16	3.14670871664419e-17	2.78674632269988e-17	8.86516819726488e-17	5.05976090687172e-17	1.64569562996556e-17	7.41300629422136e-17	2.13925262471975e-17	5.30473280031491e-17	5.03638346604947e-17	5.31078561360512e-17	2.53249297684742e-17	1.06337429376642e-16
2008009	13	8.67887107540645e-17	2.60776965867113e-17	3.32828688454935e-17	5.17368290055997e-17	4.60664305731573e-17	4.83857917217423e-17	1.07083418016889e-16	4.22438783144957e-17	4.49627956283223e-17	8.65274951844644e-17	5.5777016102704e-17	1.7445127643847e-17	6.10065088194004e-17	2.4322847573002e-17	5.32435530721376e-17	5.01644938796947e-17	5.24479495927708e-17	4.41764667786098e-17	1.06459122065433e-16
2008009	14	8.42509582443393e-17	2.2319389563485e-17	3.24872509842777e-17	4.67466754455592e-17	3.68089052940662e-17	4.61708109859526e-17	1.07000447158991e-16	5.50240659403073e-17	5.68847653200589e-17	8.66938626972123e-17	5.74824632102763e-17	1.83495328862429e-17	4.92767889932285e-17	3.92444941828852e-17	5.44063772141258e-17	4.94917571977516e-17	5.08243450492885e-17	1.08025405171297e-16	8.45071647752814e-17
2008009	15	8.17639421899677e-17	2.302675410367e-17	3.10697063059017e-17	4.01356333076399e-17	3.14511934507759e-17	4.43409394764794e-17	9.76326237714645e-17	1.08050816211433e-16	1.07770547530566e-16	8.72145082830246e-17	4.85007031757231e-17	1.92590548874285e-17	6.95599055956721e-17	5.69351728381111e-17	5.38070110190382e-17	5.0102102125358e-17	4.73469451173458e-17	1.07919207309818e-16	7.46483513823342e-17
2008009	16	7.9447680106611e-17	2.46709345148013e-17	2.93718038265601e-17	3.25610167430868e-17	3.49982799002422e-17	4.23923336590755e-17	8.65902949508133e-17	1.0817998675284e-16	1.07374455150629e-16	1.07723681301128e-16	3.16632511363995e-17	2.05802235210532e-17	1.07102677779052e-16	6.02748463834515e-17	5.24765119872065e-17	4.83913052332883e-17	4.50961168660025e-17	1.05437160725452e-16	6.99251807802241e-17
2008009	17	7.98251012149615e-17	2.71714891047657e-17	2.80679713948554e-17	2.93607613635108e-17	4.56947443925794e-17	3.9371075423474e-17	8.97179159719685e-17	1.08084635211559e-16	1.07400719850677e-16	1.07823972342739e-16	2.21073228854592e-17	2.32023976272853e-17	1.06776114359233e-16	5.21318177941848e-17	5.17223207850486e-17	4.98954664347636e-17	4.41022198681815e-17	9.83582636949986e-17	6.03444337293637e-17
2008009	18	8.20979757324663e-17	3.52382999399388e-17	2.7340184089345e-17	2.75088595369897e-17	5.17932241028861e-17	3.50521581604659e-17	1.06935984509105e-16	7.54847248167184e-17	9.40607081482535e-17	9.97909387378191e-17	2.79267866192764e-17	2.68225730277155e-17	8.26883607413163e-17	4.74824797930668e-17	5.11973035901854e-17	5.06042169243934e-17	4.30012303274918e-17	8.80450684847663e-17	5.69771451343359e-17
2008009	19	8.29982824960167e-17	3.92205865229424e-17	2.71490477440861e-17	2.57196063073872e-17	5.89395183475211e-17	2.98141574741242e-17	1.06993158726398e-16	7.60162218366796e-17	8.9336234805309e-17	1.08180572101556e-16	3.80437380704158e-17	3.15001768610026e-17	7.94187991528393e-17	4.56990208773512e-17	5.08001431846569e-17	5.08107208822635e-17	4.21486517830376e-17	9.25844623981776e-17	5.44069186029953e-17
2008009	20	8.17540286791016e-17	4.17364687925029e-17	2.7015764204626e-17	2.57454832687379e-17	6.49038911354996e-17	2.62326075790266e-17	1.08403107494597e-16	7.41685872021129e-17	1.00896359581895e-16	8.85436069368786e-17	4.58654765971221e-17	3.76391668467015e-17	7.411909760008e-17	4.27763095010559e-17	5.07926615195652e-17	5.16149113454449e-17	4.00263246396832e-17	1.07986850086863e-16	5.27302755670241e-17
2008009	21	7.91724600057721e-17	4.3977006129585e-17	2.68771358380305e-17	3.08374683980824e-17	6.63983245908971e-17	2.38517643752434e-17	9.11365835310565e-17	7.15844713928127e-17	1.07309113809447e-16	1.07546493918624e-16	4.97274190473547e-17	4.30949725408153e-17	6.8592801866624e-17	4.06685355408637e-17	5.09533189454102e-17	5.16231995855513e-17	3.57951539138516e-17	9.21024198948526e-17	5.13081227472099e-17
2008009	22	8.11014570644335e-17	4.56257224112948e-17	2.6709288332099e-17	3.62097265659819e-17	6.47201984335961e-17	2.21441190358715e-17	1.07517425556861e-16	6.91259254994424e-17	1.07424702987956e-16	8.30894272526085e-17	5.00163289288699e-17	4.59716701543209e-17	7.20258348185611e-17	4.70714722536793e-17	5.12880666745812e-17	5.04057382010607e-17	3.53013057539124e-17	1.07899692388252e-16	5.00713040301973e-17
2008009	23	7.20918405944931e-17	4.76557610807481e-17	2.65408761478984e-17	3.8201225910135e-17	6.1376593560088e-17	2.08259065047743e-17	8.43835226294614e-17	6.6660927574914e-17	1.07364408717481e-16	7.85587393980774e-17	4.85325824500707e-17	4.55160880940354e-17	7.55527718867254e-17	5.64294792445517e-17	5.15529240015905e-17	5.00454517834729e-17	4.02467943345191e-17	1.07850110918337e-16	4.9298025987483e-17
2008010	0	6.49573126745446e-17	4.96525768761889e-17	2.64055680553828e-17	3.93155595340267e-17	5.69607891907993e-17	1.97592643296237e-17	7.58579089226812e-17	6.23897200592415e-17	1.07304384705641e-16	7.28411046878944e-17	4.5913093518096e-17	4.24350821001687e-17	7.17370658053107e-17	6.12125000613457e-17	5.1816335535816e-17	5.01746003255156e-17	4.82379998736421e-17	1.07741225188989e-16	4.93700876321447e-17
2008010	1	6.1398830721079e-17	4.82513581343254e-17	2.63784963997748e-17	4.10275835678437e-17	5.2361966391601e-17	1.89730284475808e-17	6.92763021359448e-17	5.79365887827169e-17	1.07849679992914e-16	6.70453126724264e-17	4.10443117471767e-17	4.00641601376392e-17	6.5216402026881e-17	6.08036334625301e-17	5.3502682496819e-17	4.90915276479833e-17	5.42817457843863e-17	1.07625835581317e-16	5.03505884341888e-17
2008010	2	5.5403718120706e-17	4.7488554708518e-17	2.64802803999517e-17	4.11110894934366e-17	4.8213438084898e-17	1.83432366526199e-17	6.30856156655584e-17	5.70879674475074e-17	1.08376163692301e-16	5.39314168065384e-17	4.01894846922328e-17	3.78492044710625e-17	6.38382069782451e-17	5.60619619904812e-17	5.39177983947808e-17	4.78584527134987e-17	5.8359143879066e-17	1.08071564649641e-16	5.40008383972236e-17
2008010	3	4.64295469618396e-17	4.8555377395988e-17	2.67103557330112e-17	4.16366432209454e-17	4.55222142390567e-17	1.77096153194214e-17	5.6063024348282e-17	5.61898598574885e-17	7.4875768754832e-17	3.64728261269385e-17	4.614455955874e-17	3.57947568793084e-17	5.59506896339294e-17	5.50218549289565e-17	5.12367810317525e-17	4.70893963572284e-17	6.05976174214207e-17	1.09132767417339e-16	5.3988973960864e-17
2008010	4	4.31854209439554e-17	5.01051538486457e-17	2.70803228884757e-17	4.4209352938547e-17	4.50000563870508e-17	1.71010535073582e-17	4.8610285851212e-17	5.35902527599371e-17	6.67660401843136e-17	1.90100003030632e-17	5.23764009875379e-17	3.47373974971177e-17	4.32686537136073e-17	5.56237749511689e-17	4.9068294789611e-17	4.59940140935052e-17	6.14349873693355e-17	7.25565618581927e-17	5.12443579822118e-17
2008010	5	4.35711320634895e-17	5.16167628029718e-17	2.73460858585783e-17	4.50057164494979e-17	4.60505168678032e-17	1.66909188093295e-17	4.03715907262817e-17	5.0407676184037e-17	5.75360718237546e-17	5.16098391412882e-18	5.6684162140002e-17	3.24629559060784e-17	3.27922650056085e-17	5.6031361511485e-17	4.68325495549403e-17	4.47468959706447e-17	6.07736266689808e-17	6.24982571533204e-17	4.53116281829551e-17
2008010	6	4.33125958424861e-17	5.19808321609187e-17	2.79482938108862e-17	4.33502468966023e-17	4.67645339350814e-17	1.6760986192891e-17	3.17484715787737e-17	4.9209722381069e-17	4.53837425896704e-17	4.55961598622063e-18	5.83597250046961e-17	3.55933034280983e-17	2.78477568076901e-17	5.34201445009312e-17	4.467580139802e-17	4.34325941596882e-17	5.63730775048959e-17	4.64940427813098e-17	3.81220171053442e-17
2008010	7	4.2681420681499e-17	5.06014690395151e-17	2.79247220895821e-17	3.95602323724396e-17	4.75783269462762e-17	1.76175219224948e-17	2.4309580691031e-17	4.88031428184586e-17	3.23872048576138e-17	1.00012667602716e-17	5.86416521596157e-17	3.90388635246033e-17	2.63747429976911e-17	4.77454167789199e-17	4.32368676634695e-17	4.23545376283458e-17	5.29074374990108e-17	3.85579606402249e-17	3.35283978657826e-17
2008010	8	4.16128787099804e-17	4.59485436674503e-17	2.76622080546165e-17	3.4956245145501e-17	4.8015286546077e-17	1.92996956068263e-17	1.87442390072425e-17	4.80138558514415e-17	3.30068471387953e-17	1.48571809920951e-17	5.84903876425643e-17	4.10276221018624e-17	2.35645854782517e-17	4.33275807845841e-17	4.17504266761869e-17	4.15247823060398e-17	5.2743198591197e-17	2.68086238632153e-17	3.1465958251157e-17
2008010	9	4.01898592643374e-17	4.08103162879681e-17	2.76714322765176e-17	3.56386687073352e-17	4.85575695527195e-17	2.11459503771092e-17	1.74090943620035e-17	4.58516849623668e-17	2.93873385217126e-17	1.31872832951103e-17	5.80505582415625e-17	4.16675281947674e-17	2.31782357939658e-17	4.16698934038346e-17	4.01059913934818e-17	3.80483308332215e-17	5.05238173350741e-17	2.2364793625226e-17	3.17670873727988e-17
2008010	10	3.88017707017714e-17	3.86958382004022e-17	2.78179727085425e-17	3.7609803774855e-17	4.82906014881143e-17	2.41819361919637e-17	1.75256089442614e-17	4.23148568778081e-17	2.3961880627274e-17	1.28288025261356e-17	5.78976225047067e-17	4.10926662348342e-17	2.32013288576761e-17	3.89519241182715e-17	3.87262706300813e-17	3.59730593890958e-17	4.78850920907271e-17	2.07967431534988e-17	3.47206152093385e-17
2008010	11	3.7836257271703e-17	3.18517732216022e-17	2.79703671924598e-17	3.64701860640578e-17	4.49030360029323e-17	2.25836517654032e-17	1.94306953170225e-17	3.9742423546476e-17	2.0647110477799e-17	1.54935889209201e-17	5.79008477740147e-17	3.85716465346863e-17	2.30854082972272e-17	3.34270819055962e-17	3.74689769400266e-17	3.49611716822186e-17	4.42390551571329e-17	2.08286548110372e-17	4.57003931109422e-17
2008010	12	3.75879665392889e-17	2.87066806589445e-17	2.86366045075913e-17	3.47593380609181e-17	4.19146249281546e-17	2.26818889521922e-17	2.34369319203061e-17	3.80560447554312e-17	2.19431617006398e-17	2.24405384211285e-17	5.78290906093876e-17	3.64816697717253e-17	2.30617451839661e-17	2.86512650745542e-17	3.64932993806986e-17	3.46901125769545e-17	4.15449269594987e-17	1.88173533816853e-17	4.52660596212567e-17
2008010	13	3.78254390686286e-17	2.90632193442351e-17	2.89290287290056e-17	3.4045719802649e-17	4.01140224071752e-17	2.20410631115609e-17	2.80835332064828e-17	3.77240845712237e-17	2.68419423211782e-17	2.87208167983559e-17	5.82932041770695e-17	3.83097241891875e-17	2.28505518724673e-17	2.59821800466436e-17	3.57831255089644e-17	3.49362277917884e-17	4.2586372976614e-17	1.90201488666306e-17	4.02708672040127e-17
2008010	14	3.7997188707083e-17	2.73861336039168e-17	2.94031843714295e-17	3.22391875640855e-17	3.92399806393224e-17	2.18026431352652e-17	3.11473028804066e-17	3.77134518899142e-17	3.1101757216622e-17	2.64936738971298e-17	6.07564952519976e-17	4.14960216054989e-17	2.28678856041059e-17	2.56979934884959e-17	3.53521755676111e-17	3.56722601504504e-17	4.17340474200019e-17	2.20054962574259e-17	4.03709307879211e-17
2008010	15	3.75845259063164e-17	2.66520216970577e-17	2.94422988374759e-17	2.70589036658824e-17	3.95040734020559e-17	2.32107862179399e-17	3.20602116440678e-17	3.78915832827515e-17	3.34145948497895e-17	2.78483616771617e-17	6.42639401188445e-17	4.45268515836898e-17	2.26561604617529e-17	2.61614050605342e-17	3.50287377604306e-17	3.58296201160016e-17	3.93408910522296e-17	2.61418709475033e-17	1.05840911112148e-16
2008010	16	3.69187910555166e-17	2.67720293499574e-17	2.90632460259329e-17	2.37670993484072e-17	3.89815312895986e-17	2.51751029890609e-17	3.24203412730326e-17	3.82705026142762e-17	3.41183899873511e-17	3.19512531265005e-17	5.98704158587859e-17	4.74627679339438e-17	2.27013344725836e-17	2.78531215924026e-17	3.4931155022615e-17	3.64646470547337e-17	3.75583564015922e-17	2.60890060036717e-17	1.05701539937402e-16
2008010	17	3.66996275973533e-17	2.59365845386526e-17	2.96965611271221e-17	2.19335735888123e-17	3.75629072736147e-17	2.6387169707619e-17	3.27182461140646e-17	3.82086500760777e-17	3.44344096258523e-17	3.1612330518829e-17	4.72872170259588e-17	5.07291936920521e-17	2.18967498343856e-17	2.95161955010088e-17	3.51856056324612e-17	3.7330307007609e-17	3.56840236882077e-17	2.00317022841284e-17	1.06583180205058e-16
2008010	18	4.06793922795783e-17	2.32514855848181e-17	3.05859286865268e-17	2.1438582237771e-17	3.57499946451104e-17	2.73376806814752e-17	3.23398428831929e-17	3.66278184776734e-17	3.52011617889163e-17	3.07991779857712e-17	3.5506644430346e-17	5.28133335954006e-17	1.67671537999927e-17	3.01109229007423e-17	3.59310765154657e-17	3.79534994321025e-17	3.49920329688866e-17	3.13232223222748e-17	8.81941693625689e-17
2008010	19	5.72362679049424e-17	2.14610879922869e-17	3.13082286597943e-17	2.19376454015833e-17	3.26531470619432e-17	2.83090734958697e-17	3.15843021569572e-17	3.60113950291055e-17	3.54722402070888e-17	3.35010438069581e-17	2.45938790895886e-17	5.20352248156596e-17	8.1685529205956e-18	3.00013222273912e-17	3.73003638066178e-17	3.84687615374103e-17	3.60458404888185e-17	3.35719767108842e-17	7.97263819198611e-17
2008010	20	7.49740448126129e-17	2.28654853914249e-17	3.19903542550558e-17	2.25197389925802e-17	3.0453732176e-17	2.89078059841807e-17	3.1052979884032e-17	5.91024087003495e-17	3.47526760577452e-17	4.44147128016274e-17	2.13621269250387e-17	5.11110936311899e-17	4.65612813392235e-18	2.93240408750017e-17	3.89971125123633e-17	3.83241124496751e-17	3.81232184183943e-17	3.36670352759767e-17	7.62842250936469e-17
2008010	21	8.03704397367306e-17	2.58760258129061e-17	3.24702228112674e-17	2.31665582719403e-17	3.30840637907964e-17	2.87793680811424e-17	3.4715029646293e-17	9.44551437427333e-17	3.61170787522789e-17	5.45262368466613e-17	2.22266001234695e-17	5.13185559014053e-17	3.74874103917822e-18	2.81986090656251e-17	4.05651986789427e-17	3.84795966198907e-17	3.66109620145509e-17	3.36014942788015e-17	6.96243055261061e-17
2008010	22	7.41858374631496e-17	3.12679326627894e-17	3.23441229105274e-17	2.40971274766289e-17	4.59318275219178e-17	2.85901834228411e-17	4.38286281759223e-17	9.56112723067791e-17	4.59239718211964e-17	3.90404018697332e-17	2.26758320870067e-17	5.18741140010335e-17	3.35502110272224e-18	2.69541026506798e-17	4.17673258449525e-17	3.90550521607298e-17	3.35755929345752e-17	3.84835110884861e-17	6.16254268755495e-17
2008010	23	6.56435269998815e-17	4.99586691896631e-17	3.26636036380147e-17	2.5139008915979e-17	6.07833079296334e-17	2.89984132143055e-17	3.88652166374924e-17	9.1070664316187e-17	6.44241261338594e-17	2.46294015103061e-17	2.18311077029549e-17	5.21482701188899e-17	3.55459244768769e-18	2.64877777603903e-17	4.25381435933775e-17	3.98998002437978e-17	3.19802491282993e-17	5.20358820948846e-17	5.76076256037179e-17
2008011	0	5.81978960716062e-17	6.96778432125171e-17	3.39276194416765e-17	2.65653509452795e-17	6.20956702123918e-17	3.44529502443058e-17	2.87314885561892e-17	8.08809719658609e-17	7.61577777391022e-17	2.75332871824611e-17	1.91300513582856e-17	5.0872143005524e-17	5.28480284205844e-18	2.63252709736723e-17	4.29046638746647e-17	4.08232183508916e-17	3.01533080466405e-17	6.10662589667054e-17	5.76192028926948e-17
2008011	1	5.29117066902755e-17	6.10692575184843e-17	3.4835149132743e-17	2.94928395250708e-17	1.23742934339916e-16	3.81081617710294e-17	2.52670638127273e-17	7.8410824805656e-17	6.79388186562848e-17	2.70907933865982e-17	2.04011865960994e-17	4.85128787527318e-17	7.92565181006466e-18	2.61132272524081e-17	4.3102115122406e-17	4.17466962942398e-17	3.00084864838031e-17	5.31710174774762e-17	5.59034876059328e-17
2008011	2	4.99499886158542e-17	5.89003027122809e-17	3.49587991219658e-17	3.37493244689292e-17	9.53735429193552e-17	3.9211605716152e-17	2.2066025234895e-17	7.46290824158675e-17	6.17854177070377e-17	3.01448511851815e-17	2.78514844142697e-17	4.6437862255639e-17	3.47966660707253e-17	2.46011290874317e-17	4.50873383452033e-17	4.26973741381482e-17	3.22055543216547e-17	5.12547607393479e-17	5.32986946408397e-17
2008011	3	4.57472356372407e-17	5.65683725334766e-17	3.51564138507839e-17	3.67658920824562e-17	1.0219284799979e-16	3.9227262546287e-17	1.98906914658985e-17	6.98284816227972e-17	5.51630213645877e-17	3.47139662426441e-17	3.21430474947933e-17	4.39761055863189e-17	1.06948821966362e-16	2.0684496337818e-17	4.4574888182274e-17	4.35156379810049e-17	3.55389466833679e-17	4.71026028045e-17	5.15795862000758e-17
2008011	4	3.99012243348221e-17	5.00972398122958e-17	3.56576076866602e-17	4.07702262004124e-17	1.06288946282573e-16	3.95595835427259e-17	1.96667651940498e-17	6.6604417753598e-17	4.8547415950626e-17	4.13292302161623e-17	3.22164223443991e-17	4.068973807666e-17	4.70592065367346e-17	1.64424164474949e-17	4.42135285259612e-17	4.42456803604219e-17	3.90562921433404e-17	3.91047923214775e-17	4.74307147745878e-17
2008011	5	3.16501382436899e-17	4.46105104242191e-17	3.58268464228044e-17	4.15749540621756e-17	7.24106406878506e-17	3.94801293187124e-17	2.12607261128696e-17	6.53623815062546e-17	4.16451157006982e-17	4.86686916871454e-17	3.09972465302685e-17	3.73314142819891e-17	3.59222431140336e-17	1.39023340439865e-17	4.38712427982026e-17	4.48797101684907e-17	4.10539396983419e-17	3.30899574968691e-17	3.9856981280142e-17
2008011	6	2.31167084377504e-17	3.62182460885406e-17	3.49439681448625e-17	4.41341539893829e-17	6.15131463140413e-17	3.80769903052437e-17	2.40521380466596e-17	6.5191560326428e-17	3.46003883747887e-17	5.19993685398945e-17	3.08414126180342e-17	3.48579567256816e-17	3.29977278371707e-17	1.43298329809375e-17	4.33309479238342e-17	4.55020058904857e-17	4.23783629995257e-17	2.91051325589114e-17	3.64841726249742e-17
2008011	7	9.09368602376866e-18	3.18475179901929e-17	3.4188126834945e-17	4.09922251713601e-17	6.13001898665921e-17	3.56890358057762e-17	2.68710405069932e-17	6.29564962989838e-17	2.93894911067846e-17	5.0905226624858e-17	3.40584656859974e-17	3.30424196298737e-17	2.99857930870117e-17	1.91265026561201e-17	4.30811332762601e-17	4.5927430737438e-17	7.09215520337763e-17	2.86833242158652e-17	3.40869315636547e-17
2008011	8	4.46984049669053e-18	3.60623308821825e-17	3.36082502868962e-17	3.53237542750642e-17	5.46204265152094e-17	3.32478581948561e-17	2.73363919295933e-17	5.59414500250016e-17	2.63751275378311e-17	4.7551565796409e-17	3.70999331334849e-17	3.26220701605279e-17	3.45909562417992e-17	2.45360711810879e-17	4.3058458928107e-17	4.57046547410071e-17	6.93400965084923e-17	3.1400305462309e-17	3.15744169300239e-17
2008011	9	3.89086287018819e-18	4.28812958667398e-17	3.25644043105608e-17	3.16361800826331e-17	4.51223282816869e-17	3.14093370944604e-17	2.80536839328317e-17	4.75961906597841e-17	2.44826616775419e-17	4.33988893160095e-17	4.35556192576408e-17	3.31122799884951e-17	4.16181763366636e-17	3.06783933924999e-17	4.29508521597896e-17	4.52388577030645e-17	4.60936953263929e-17	3.43534429006315e-17	3.27019175065397e-17
2008011	10	9.37966866160709e-18	5.55510451942908e-17	3.11316966473232e-17	3.27172198360389e-17	4.31545631302653e-17	3.07142649684368e-17	3.11197542917063e-17	3.89388793459761e-17	2.23053505173096e-17	4.13416230561252e-17	4.30597547563741e-17	3.20988132177865e-17	4.86733021283758e-17	3.68723193393779e-17	4.27544500003137e-17	4.52217342035181e-17	3.8698098541916e-17	3.62174141469153e-17	3.9140105507768e-17
2008011	11	1.25790101571571e-17	5.34840638514124e-17	2.89831302338346e-17	3.57066798520384e-17	4.59278229897277e-17	3.10882603168648e-17	3.6738078424001e-17	3.20248561271016e-17	2.02255308458549e-17	4.01144746393674e-17	3.99173914386696e-17	2.76509353438752e-17	5.35281374523679e-17	4.0302545683873e-17	4.25352138633641e-17	4.3340205939868e-17	3.58109929520324e-17	3.67311915335737e-17	4.26945437402538e-17
2008011	12	1.39050397698083e-17	5.08532246373505e-17	2.70796346731866e-17	3.77716152215741e-17	4.59266814274315e-17	3.13804585735487e-17	3.61513094110306e-17	2.97418233560649e-17	1.91645685784805e-17	3.79990101525207e-17	3.69778472552576e-17	1.92591090723192e-17	5.85760564874584e-17	4.03164887138773e-17	4.20814493930884e-17	4.26105703544949e-17	3.27565769330612e-17	3.67211717801113e-17	3.39016506248691e-17
2008011	13	1.49537269505391e-17	5.01669356017678e-17	2.5402743326144e-17	3.78907635392465e-17	4.40095202356511e-17	3.21815119740829e-17	3.5250380133156e-17	3.08530813197212e-17	1.91174975932497e-17	3.58425414427522e-17	3.60935165313401e-17	1.66932388761751e-17	6.32622503049406e-17	3.86308019183107e-17	4.12360431577123e-17	4.20939359788884e-17	3.04036575034194e-17	3.75468859075102e-17	2.10123595880831e-17
2008011	14	1.62265206084089e-17	4.95876132702021e-17	2.35856689153711e-17	3.72080260643687e-17	4.2577481158061e-17	3.4136818686838e-17	3.50607577474811e-17	3.35192682094324e-17	2.00510314692906e-17	3.44941365324634e-17	3.55124308584686e-17	1.92357875788584e-17	6.55989390097065e-17	3.70454489245073e-17	4.05265813927639e-17	4.23570820134887e-17	2.97209912951174e-17	3.92080103496186e-17	1.41964447314089e-17
2008011	15	1.82938900426885e-17	4.68212091742109e-17	2.21972845281558e-17	3.3687463434505e-17	4.17334284071596e-17	3.50935701432662e-17	3.32882170841212e-17	3.62576354380921e-17	2.17913943736077e-17	3.37356612343709e-17	3.51699267699089e-17	2.53796743769617e-17	6.47007687005705e-17	3.60945552145106e-17	3.91043814994304e-17	4.30744640885345e-17	2.97367306187705e-17	4.1103641135453e-17	1.66651454839262e-17
2008011	16	9.31348149020451e-18	3.91080362186047e-17	2.10957351663685e-17	3.27644598875363e-17	4.01675137047004e-17	3.48530798649245e-17	3.2078741150996e-17	3.88093975842903e-17	2.40612282568115e-17	3.36479997388503e-17	3.57620227193107e-17	3.68523730382713e-17	6.52616540150987e-17	3.56907559307508e-17	3.82275731387451e-17	4.18954835474109e-17	2.97720606056294e-17	4.29637710978177e-17	2.9995009301409e-17
2008011	17	8.36536559177969e-18	3.06269087976994e-17	2.09211208948139e-17	3.7943345825065e-17	3.87577848043896e-17	3.49872560764281e-17	3.15333686764954e-17	4.06028846896797e-17	2.84014643204268e-17	3.43460759206515e-17	3.69111629474904e-17	3.78703654817528e-17	6.42186427246302e-17	3.57193078808775e-17	3.75118953179607e-17	4.18562725599189e-17	3.00288134179004e-17	4.43732183147382e-17	4.98214805745621e-17
2008011	18	2.08057687505464e-17	2.34962624892466e-17	2.02842045336596e-17	4.61421244893709e-17	3.79915268371068e-17	3.55227874910843e-17	3.18798456022057e-17	4.16052359124932e-17	2.80990782179411e-17	3.59132649775082e-17	3.77651169331885e-17	3.76447124980544e-17	6.39536112485351e-17	3.59943582877948e-17	3.71667564196935e-17	4.20061799094947e-17	3.10354815455137e-17	4.50476142875271e-17	6.6748341329937e-17
2008011	19	3.07090139333227e-17	2.14942235838402e-17	1.93875498895315e-17	4.10368292467779e-17	3.74679035703935e-17	3.68693840043015e-17	3.24645860931809e-17	4.1254301383127e-17	2.61441564189104e-17	3.68142691328914e-17	3.81123824236264e-17	3.7028745666903e-17	6.40602089752488e-17	3.65238845317339e-17	3.7069245267524e-17	4.2068627730471e-17	3.20661187533006e-17	4.4817230912756e-17	7.30040815917117e-17
2008011	20	2.84453906263044e-17	2.42407032445381e-17	1.86569798425868e-17	2.95151972832189e-17	3.65501445450541e-17	3.9987172940231e-17	2.99930417397792e-17	3.89943414214007e-17	2.45357812011563e-17	3.64525773127302e-17	3.73574237578495e-17	3.37463278973745e-17	6.27058370420825e-17	3.72917091014633e-17	3.72234375287106e-17	4.20531586992257e-17	3.32128663536652e-17	4.33416921934033e-17	7.49959460182902e-17
2008011	21	2.38015788676473e-17	3.01704019627008e-17	1.76979973551038e-17	2.38619986842556e-17	3.41376922177244e-17	4.27218969170177e-17	2.68833595508006e-17	3.45411667066916e-17	2.18031191894029e-17	3.27086891822823e-17	3.59985881200576e-17	2.97390292929828e-17	6.18289427460829e-17	3.81473186980225e-17	3.74338394310114e-17	4.1974811845216e-17	3.50904371065941e-17	4.16814302257265e-17	7.72000781773264e-17
2008011	22	2.52794352416424e-17	3.74792152418752e-17	1.70996924766136e-17	2.77800746636226e-17	3.03843790751607e-17	4.41103132561077e-17	2.09916908675989e-17	3.02419459565299e-17	2.09527512705792e-17	2.59404194710788e-17	3.52897080929195e-17	2.54924926672887e-17	6.15807063934526e-17	3.91806564449571e-17	3.75364806155017e-17	4.18511236403044e-17	3.70222777771797e-17	4.02436054386238e-17	7.8528737099509e-17
2008011	23	4.18855817757845e-17	4.29050336411178e-17	1.63968688229313e-17	3.34009318936132e-17	2.65613165960032e-17	4.41117154951758e-17	1.47282633004611e-17	2.81451455451469e-17	2.25212334174019e-17	1.65882261125629e-17	3.52411872537213e-17	2.39024489015385e-17	6.11638504421769e-17	4.0128778239243e-17	3.91434098134546e-17	4.18247000619424e-17	3.76367522582654e-17	3.73673360721678e-17	7.61314853732976e-17
2008012	0	5.1282060307656e-17	4.79520648056113e-17	1.53492816895741e-17	3.74869941752374e-17	2.37983429529014e-17	4.33277040616097e-17	1.25261916184703e-17	2.77755854309802e-17	2.4549666333575e-17	1.25960418407591e-17	3.53472246410167e-17	2.09865670485537e-17	6.22134329750035e-17	4.06425833440098e-17	3.76278656864425e-17	4.15709481572685e-17	3.64693875885481e-17	3.14555786455592e-17	6.625665533993e-17
2008012	1	5.78230326033351e-17	5.15072814118831e-17	1.34553673571692e-17	3.9046351119735e-17	2.55959169135755e-17	4.22516370854115e-17	1.34559458286187e-17	2.78294161392054e-17	2.67174931278835e-17	1.69895110236168e-17	3.50660099444469e-17	1.79476080704569e-17	6.2653791844564e-17	4.12098927723956e-17	3.68251929974365e-17	4.09533449886549e-17	3.49238522767207e-17	2.01778220176606e-17	6.1380340114932e-17
2008012	2	6.22376188481751e-17	5.10759868470702e-17	1.00729308034545e-17	3.85709368736079e-17	3.27110917674905e-17	4.09363503810499e-17	1.75841780375844e-17	2.9606212089728e-17	2.7468991524876e-17	2.65459622475109e-17	3.49605368900822e-17	2.35785242487971e-17	6.32294191705958e-17	4.20155302507034e-17	3.65267749141414e-17	4.01914634632097e-17	3.39825242929176e-17	1.0916422124067e-17	1.07816932893094e-16
2008012	3	6.45212278306445e-17	4.30492819476111e-17	1.35409895428632e-17	3.78748731680982e-17	3.61567579649699e-17	3.97016863541892e-17	2.51261286324541e-17	3.15977911059904e-17	2.70576821168512e-17	3.77143551622416e-17	3.48832324332544e-17	2.95184423774521e-17	6.34460027634473e-17	4.28578950348617e-17	3.69192201629873e-17	3.9483151442686e-17	3.41437804043023e-17	1.08676938466669e-17	1.07566698802143e-16
2008012	4	6.52063095228466e-17	3.24087695966673e-17	2.17096413579346e-17	3.72407192328886e-17	4.02202920083502e-17	3.8009730892665e-17	3.18894446018642e-17	3.00410845484685e-17	2.64138707866948e-17	5.12535770105921e-17	3.47213084289786e-17	3.06347757837542e-17	6.32061956090472e-17	4.35004429592139e-17	3.76663877811487e-17	3.88597165575625e-17	3.48273867764093e-17	1.59115516421361e-17	1.06693270424851e-16
2008012	5	6.84256934370149e-17	3.03873486796432e-17	2.62709476245787e-17	3.61413086560297e-17	4.05739891818766e-17	3.57810856804958e-17	3.73223948099593e-17	2.81409032075966e-17	2.59204013378245e-17	5.80767461489033e-17	3.44906185837688e-17	3.06508209134124e-17	6.27644898161034e-17	4.38783062839618e-17	3.78084944317319e-17	3.81992863542187e-17	3.55680829593988e-17	2.01586510654239e-17	1.06932371063524e-16
2008012	6	7.23052974450901e-17	3.52194904138208e-17	3.03274828041786e-17	3.52121825637666e-17	3.76855194216087e-17	3.30707176823619e-17	4.10580813252932e-17	2.96992851353361e-17	2.53841917839088e-17	6.11053662092531e-17	3.41419117686843e-17	2.99891574457828e-17	6.23680652277015e-17	4.40082497190794e-17	3.72057875195296e-17	3.74273715648516e-17	3.63466626523601e-17	2.18271979936275e-17	1.07829621416096e-16
2008012	7	7.4221153786635e-17	4.04066964519095e-17	3.37844653112752e-17	3.43595676163417e-17	3.39796129578585e-17	2.87476199635406e-17	4.4084598265134e-17	3.70438109876792e-17	2.4515816780644e-17	1.13848872282284e-16	3.36054459847593e-17	2.90177182297531e-17	6.25660335656064e-17	4.42547782590664e-17	3.59378035829424e-17	3.64648204694725e-17	3.71278486553626e-17	2.21934742279837e-17	1.08986078226789e-16
2008012	8	1.14192945843764e-16	4.3042964244662e-17	3.76703389548256e-17	3.35450857012486e-17	3.25605107294176e-17	2.61561794625909e-17	4.67261910659895e-17	4.60896926276808e-17	2.44521777539914e-17	1.15699513731711e-16	3.26775579536531e-17	2.82963582977478e-17	6.29199556596455e-17	4.46838932422792e-17	3.4364827344979e-17	3.48625082981115e-17	3.78336694638443e-17	2.23778217161771e-17	1.10259792320777e-16
2008012	9	4.31401875543441e-17	4.75810468740305e-17	4.11640174534653e-17	3.3545116286964e-17	3.2571658433214e-17	3.46350925431143e-17	5.47329590428992e-17	4.68739049700933e-17	2.59807238523247e-17	1.1452397708384e-16	3.12771550889151e-17	2.77273092066413e-17	6.38268444354087e-17	4.59073406884658e-17	3.30213089460259e-17	3.23853758141442e-17	3.83672496168516e-17	2.43610696062763e-17	1.10929780279391e-16
2008012	10	1.57308559626621e-17	5.64018259727509e-17	4.23946924656313e-17	3.49069941806928e-17	3.38804910949394e-17	4.10827681284212e-17	5.35048579777215e-17	4.83438507150659e-17	3.17595658984141e-17	1.11059555441741e-16	2.90333649943087e-17	2.75377037567764e-17	6.52107684841282e-17	5.39979565306594e-17	3.22620319314132e-17	2.97611436677665e-17	3.85984888980666e-17	2.94687043611078e-17	1.12175894083938e-16
2008012	11	1.42249615118236e-17	6.07879106005645e-17	4.42348592358133e-17	3.73516829021099e-17	3.95325065871651e-17	4.3825824031151e-17	4.84423326355978e-17	4.88648101573399e-17	4.69122908189156e-17	4.80461392398626e-17	2.54338347924568e-17	2.71694434180383e-17	6.60339786327652e-17	5.93679970847738e-17	3.17002441480056e-17	2.80756115545429e-17	3.85611980095777e-17	4.03140870191381e-17	1.12030926333212e-16
2008012	12	2.67001725320098e-17	5.77002293391065e-17	4.32569395734795e-17	4.24226398753539e-17	4.22646643559911e-17	4.80817521663795e-17	4.06572276770381e-17	4.01596695881114e-17	5.19100739829867e-17	3.34588499667533e-17	2.10128708196153e-17	2.67217614572318e-17	6.60578874528605e-17	6.05881239521896e-17	3.1145620139269e-17	2.7026843979967e-17	3.82368309238926e-17	4.73904746060305e-17	1.11480278137952e-16
2008012	13	3.55646387716008e-17	5.36068436526847e-17	4.15203392410631e-17	4.92013721792077e-17	4.543498561369e-17	5.13383685104985e-17	3.04273859640266e-17	2.54786130258308e-17	5.08882232858604e-17	2.43541833622955e-17	1.89846767582943e-17	2.62984495715179e-17	6.61346851481986e-17	6.03202071005695e-17	3.06882747917114e-17	2.62599219041003e-17	3.73067216274259e-17	5.07169891368641e-17	1.11038932993749e-16
2008012	14	4.87916878292837e-17	4.95147343476013e-17	4.09755987560643e-17	5.30955080590553e-17	4.39105696159501e-17	5.41572518927678e-17	1.50100887831251e-17	1.86722271429492e-17	4.7646068143632e-17	3.33453867909235e-17	2.06000276690893e-17	2.55980533941858e-17	6.61210251122857e-17	6.02593520931057e-17	3.05205678677899e-17	2.58968970574951e-17	3.56541684306238e-17	5.45955327588819e-17	1.1166225792294e-16
2008012	15	5.72707593527215e-17	4.52213165165568e-17	4.22891669295728e-17	5.24297470585241e-17	3.60270162208753e-17	5.55403350049251e-17	7.25636491882073e-18	2.97071533453767e-17	3.93944524574226e-17	5.40903964156397e-17	2.48060778093777e-17	2.44555590818722e-17	6.53370511205692e-17	5.98989941154988e-17	3.02467690068349e-17	2.58429149405342e-17	3.34817128620658e-17	1.10947299827499e-16	1.1546799441169e-16
2008012	16	6.56639255245281e-17	4.40227247699022e-17	4.12752407498608e-17	4.90583816639828e-17	2.89045856090708e-17	5.43040114779149e-17	1.41941134238897e-17	3.88859030401456e-17	1.86869857019992e-17	3.99285910097224e-17	2.93951367544815e-17	2.25604285499055e-17	6.32326334010925e-17	6.07563899788757e-17	3.01134784721888e-17	2.57864132020994e-17	3.23909220694327e-17	6.41549019522676e-17	1.18426464012348e-16
2008012	17	7.75372632943308e-17	4.2528574707442e-17	4.13342670586022e-17	4.50651303804095e-17	2.91048596692666e-17	5.25968437867277e-17	3.02224160039122e-17	4.27246383905381e-17	4.80317298636102e-18	5.09438478317861e-17	3.33794429968451e-17	1.96002902196527e-17	5.98446461036434e-17	6.04124950904263e-17	2.94647344141583e-17	2.53386828806978e-17	3.44260074950756e-17	4.59724986964964e-17	9.83886205887706e-17
2008012	18	8.35960816254899e-17	4.13912973923033e-17	4.13647038577572e-17	4.10604262990857e-17	3.2456588086228e-17	5.15578114607981e-17	4.14668689695698e-17	4.47125062907575e-17	9.56640802716674e-18	6.52000970039969e-17	3.52766220664511e-17	1.70698265587847e-17	5.77428934600249e-17	6.01411610685217e-17	2.89757823080224e-17	2.54579904308775e-17	3.84320307895853e-17	4.05460322333287e-17	1.20801909302291e-16
2008012	19	8.85895173134343e-17	4.12406298616126e-17	4.11473349629445e-17	3.90777789232701e-17	3.59764109102954e-17	5.09469271948889e-17	5.34132242574538e-17	5.7791057281576e-17	3.47306819572473e-17	8.26573803544956e-17	3.43308546605648e-17	1.70753190735035e-17	5.91759920252119e-17	6.00392887209038e-17	2.83187102419456e-17	2.69782481682502e-17	4.16339853266583e-17	3.7203247542391e-17	7.60384185326813e-17
2008012	20	8.09874377657818e-17	4.2832582994377e-17	4.04422212150762e-17	3.92538444149084e-17	4.42485238525196e-17	5.0355796398326e-17	6.71446775938699e-17	6.91525036489269e-17	4.99549578907998e-17	1.09567067452532e-16	3.26365336119479e-17	1.91612030853108e-17	6.08144189208149e-17	5.99607031463795e-17	2.75761039174311e-17	2.75583647131219e-17	4.04432639125026e-17	4.27971429972029e-17	6.95734596266075e-17
2008012	21	6.47901244803073e-17	4.38855830316309e-17	4.03198673850409e-17	4.05297325717516e-17	5.72775086651611e-17	5.00423153193544e-17	1.11452384633099e-16	7.38982334596791e-17	5.97536909483293e-17	1.09296698840117e-16	2.3689534530281e-17	2.2240348227981e-17	6.37158602397976e-17	6.01843081397957e-17	2.7010613375564e-17	2.73634253708864e-17	3.52313174322058e-17	5.78167347799248e-17	6.83095815573912e-17
2008012	22	5.55175803620841e-17	4.42773541266268e-17	4.09504711747849e-17	4.19438224772224e-17	6.50107333974596e-17	4.9695260704584e-17	1.08380854812086e-16	7.17048738629863e-17	7.15216332878305e-17	1.08592323844818e-16	1.15356535493234e-17	2.42708873758881e-17	6.43568696879002e-17	6.06195781733266e-17	2.81654385666886e-17	2.74104942555575e-17	2.78598284559873e-17	7.27534305265844e-17	6.67334502069526e-17
2008012	23	6.13363408015401e-17	4.42031449356743e-17	4.19419735355615e-17	4.25704285375911e-17	6.62692793604023e-17	4.87005297548967e-17	1.07948551988532e-16	6.67582712911708e-17	7.95426443201904e-17	8.48758595944109e-17	1.17733361045493e-17	2.65870645582242e-17	6.22350302081572e-17	6.0304810849445e-17	3.56224466613191e-17	2.80071184402353e-17	2.96234104121128e-17	8.56589685699778e-17	6.37978923802165e-17
2008013	0	1.11907988488592e-16	4.42956637392339e-17	4.25093218624597e-17	4.10611675635737e-17	6.38425289384059e-17	4.8539258009354e-17	7.90584370877343e-17	6.14742408362388e-17	1.11085701139265e-16	7.56158419836699e-17	1.65678090740074e-17	2.78287365212668e-17	6.04059682399738e-17	5.94019183026733e-17	3.79469884054521e-17	2.91400029277446e-17	3.43622129977716e-17	1.09924948629015e-16	6.07125860828883e-17
2008013	1	1.17761693093367e-16	4.43550778804001e-17	4.23670833460979e-17	3.98646877716313e-17	6.28052811109068e-17	4.83865801399418e-17	7.36931095378251e-17	5.71278547630011e-17	1.08944433634501e-16	7.24883286018218e-17	2.46204651660627e-17	2.82424921963411e-17	5.89496827621738e-17	5.86188197069204e-17	3.56685770538008e-17	2.96720555614184e-17	4.07353061990669e-17	6.82827753172252e-17	5.83867007695209e-17
2008013	2	9.88571790362285e-17	4.47637419248742e-17	4.19274455896149e-17	4.01917275379275e-17	6.30677923538743e-17	4.81774672354152e-17	6.95432994497888e-17	5.3531675967397e-17	8.02828204986654e-17	6.94939960231155e-17	2.35496316179349e-17	2.83690780552083e-17	5.90867081599339e-17	5.79980040571772e-17	3.37529122251121e-17	3.01794176858428e-17	4.80862251647576e-17	6.15215691813533e-17	5.65753050002656e-17
2008013	3	5.92025716242602e-17	4.51144081766797e-17	4.1559948643662e-17	4.12525240992315e-17	5.93949490330573e-17	4.79962517935863e-17	6.87752176052222e-17	5.27634935480148e-17	7.75770546344841e-17	6.97622413432535e-17	2.30577977246848e-17	3.00482181183541e-17	6.17739727090743e-17	5.75681886040746e-17	3.30567924109353e-17	3.10215295905158e-17	5.2596118013336e-17	6.07242784902102e-17	5.3639844576408e-17
2008013	4	1.22681483643811e-17	4.61914388482605e-17	4.12483862288711e-17	4.09368039962468e-17	5.41513284355649e-17	4.85403788213161e-17	6.88934876471144e-17	5.13131807606918e-17	7.67857157739557e-17	7.88525654282218e-17	2.45944975423105e-17	2.60768829557201e-17	6.52107743910713e-17	5.7080794792649e-17	3.35684588499919e-17	3.19739120508832e-17	5.83640531000004e-17	6.22513389248406e-17	5.20015191758897e-17
2008013	5	4.9377191229999e-17	4.78088490969768e-17	4.10923804802431e-17	4.11403976782664e-17	4.87363105736895e-17	4.87396231630258e-17	7.16428579202951e-17	4.62314753833645e-17	7.47324313015618e-17	8.80921304708895e-17	2.57014721861596e-17	2.27240682410185e-17	6.70981198173907e-17	5.64445746108679e-17	3.52582269636012e-17	3.28819512879472e-17	6.20302431640585e-17	6.35597207862276e-17	5.22211194722246e-17
2008013	6	5.77095110557202e-17	4.90813724838954e-17	4.09969165591579e-17	4.17723613866383e-17	4.58181973914459e-17	4.95188033442896e-17	7.288273510396e-17	4.50167980766804e-17	7.23914889833386e-17	7.67159254242727e-17	2.75527465945438e-17	1.79888151919007e-17	6.72974264795514e-17	5.56261266176327e-17	3.64725482387887e-17	3.39604451808172e-17	6.23641975896265e-17	6.36440956479138e-17	5.1990863520446e-17
2008013	7	5.88259533706808e-17	4.96104399786727e-17	4.47713950401095e-17	4.29242740514958e-17	4.52580861691202e-17	5.00030348208771e-17	6.20507684705145e-17	4.7830771338434e-17	7.45510666387406e-17	6.20477412270556e-17	3.26922729818983e-17	1.65677934570393e-17	6.57552156126067e-17	5.46708925959753e-17	3.71390767622615e-17	3.47722644540074e-17	6.10064780196361e-17	6.37956772750792e-17	5.16413806737666e-17
2008013	8	5.91669857715124e-17	4.99663335341037e-17	4.63130265353561e-17	4.41690071824331e-17	4.54328653285465e-17	5.01928689433716e-17	4.97618853835341e-17	4.9521756747369e-17	7.61894913311588e-17	5.50715840248709e-17	3.92471264619854e-17	1.77080029015956e-17	6.36520055540914e-17	5.3734239377915e-17	4.06164019447895e-17	3.4902557261571e-17	5.81339745310975e-17	6.62568998697776e-17	5.27079175174235e-17
2008013	9	5.8847159597688e-17	5.17791491266073e-17	4.73427187554475e-17	4.58316338005687e-17	4.61811514619393e-17	5.03677029028233e-17	4.36917007358102e-17	4.9837017898957e-17	7.38622469778008e-17	5.35182565431403e-17	4.44113532989689e-17	1.68723091698776e-17	6.46895077384026e-17	5.28483868887453e-17	4.22363171396591e-17	3.73880894186851e-17	5.43246232711063e-17	6.93070288319924e-17	5.72598430817579e-17
2008013	10	5.70579249228712e-17	5.76702660604462e-17	4.7780534578479e-17	4.96337874353077e-17	4.71207151365707e-17	5.04566366008509e-17	4.52223965456625e-17	5.41223084326323e-17	5.859479995213e-17	5.30810840061423e-17	4.87000314951117e-17	1.43344761128678e-17	6.35564456891571e-17	5.21409028499996e-17	4.27756733309959e-17	4.59607890445587e-17	5.18767969841838e-17	7.15440628399974e-17	5.77294498943668e-17
2008013	11	5.513801596473e-17	6.4383611602845e-17	4.74458420469601e-17	5.37120159438625e-17	4.79502167451829e-17	4.98789496182194e-17	4.59741627041572e-17	6.11517440586e-17	4.75284677753547e-17	5.25192926418294e-17	5.37645867678505e-17	2.26626390666939e-17	6.11675023846253e-17	5.1760556405599e-17	4.30140492502207e-17	4.64166225237693e-17	5.22518023709014e-17	6.34247898833314e-17	5.41633083933837e-17
2008013	12	5.4132246524705e-17	6.50013039602164e-17	4.79839502706386e-17	5.78598662592996e-17	5.01463305229777e-17	5.15837201041709e-17	4.77595762935052e-17	6.23357391013105e-17	4.41612742811595e-17	4.96414237447427e-17	5.83266372810202e-17	3.06962203553354e-17	5.71693327402636e-17	5.14276542500435e-17	4.33795874686925e-17	4.55786854076853e-17	5.22815975716234e-17	5.23181879259207e-17	4.94545600748244e-17
2008013	13	5.45280057501331e-17	6.30881621242208e-17	4.81256816271104e-17	6.13901243125659e-17	5.32722253708278e-17	5.08543646923691e-17	4.78532410709693e-17	5.8708569231389e-17	4.5577491578935e-17	4.57146918231284e-17	6.17347011818267e-17	3.55659945635348e-17	3.88142828146643e-17	5.13021490264047e-17	4.39541789645551e-17	4.45119283948483e-17	4.98600307939552e-17	4.52194529972649e-17	4.61135728430136e-17
2008013	14	5.45579712296009e-17	6.08080760970292e-17	4.76893494596457e-17	6.08503046185883e-17	5.56926765451277e-17	5.07133215798025e-17	4.53266812041536e-17	5.48441687534375e-17	4.98100255213195e-17	4.36581661174931e-17	6.62704207324488e-17	3.89795030741124e-17	1.46096063587607e-17	5.1305277307768e-17	4.44584972665754e-17	4.39026233727864e-17	4.72005202376187e-17	4.36571893684413e-17	4.3939426706085e-17
2008013	15	5.2751002971907e-17	5.92690243222162e-17	4.65110643657076e-17	5.79686033770596e-17	5.73749120101998e-17	5.06192700813809e-17	4.38100728706225e-17	5.23506767138771e-17	5.19707906367915e-17	4.32753718456746e-17	7.00697568290406e-17	4.24573481768567e-17	6.65607513231866e-18	5.14605665221852e-17	4.39661399704004e-17	4.30775273575658e-17	4.59607268681025e-17	4.56261863829265e-17	4.30899991749134e-17
2008013	16	4.92092691506361e-17	5.92415789884305e-17	4.51448829906867e-17	5.45541982087156e-17	5.79872472427783e-17	5.05071671575068e-17	4.40538766725701e-17	5.14975079940209e-17	5.18763471676992e-17	4.26998893028623e-17	7.272746420985e-17	4.48230249973725e-17	6.8485814470442e-18	5.20965837867723e-17	4.31792901543029e-17	4.17612371680796e-17	4.54795162743786e-17	4.76392317378698e-17	4.32576904275751e-17
2008013	17	4.56225712274753e-17	5.97552998997205e-17	4.38619872995673e-17	5.25964075861045e-17	5.79662746754856e-17	5.02794814850101e-17	4.34694395817548e-17	5.12311576930542e-17	4.90318183860562e-17	4.18331469318084e-17	7.50007332217309e-17	4.59896247907748e-17	1.20191795465759e-17	5.23267861181057e-17	4.27741624904367e-17	4.00671523983074e-17	4.49532987059293e-17	4.76660835013104e-17	4.36347916236917e-17
2008013	18	4.36832097397008e-17	5.96225251232482e-17	4.29355017136344e-17	5.07615417718552e-17	5.76747301719084e-17	4.92700342410712e-17	4.26040470380947e-17	5.17363937082406e-17	4.71120616562167e-17	4.03554637987045e-17	7.67265515512427e-17	4.77118707598064e-17	1.76515848709811e-17	5.17892437871247e-17	4.30862494535275e-17	3.82407955053501e-17	4.51251196756079e-17	4.54460700595378e-17	4.39124793511089e-17
2008013	19	4.27729006166363e-17	5.88152866340013e-17	4.22700046151709e-17	4.77444749691599e-17	5.8203658861441e-17	4.84997787441837e-17	4.16135626387996e-17	5.27693478804475e-17	4.55142893649683e-17	3.90116037511262e-17	7.67346293466447e-17	4.97013837320263e-17	2.09613763446052e-17	5.25628076616728e-17	4.42222337773449e-17	3.59025897448501e-17	4.62726264622627e-17	4.38826806556212e-17	4.54441596094805e-17
2008013	20	4.29189251890287e-17	5.77075696007572e-17	4.17714658279531e-17	4.62710586132275e-17	5.87000509679935e-17	4.78623326125906e-17	4.10069788806666e-17	5.34478082098487e-17	4.48024945124025e-17	3.78830908357644e-17	7.2836337669548e-17	4.99654620761188e-17	2.28622067443164e-17	5.4434050791406e-17	4.74068806539e-17	3.41384786365423e-17	4.64151090931388e-17	4.28069003111942e-17	4.71218460420886e-17
2008013	21	4.4149645868247e-17	5.66248425330741e-17	4.13040920901524e-17	4.56174271781048e-17	5.79902402952019e-17	4.64515980478135e-17	4.05151417043184e-17	5.42622213572431e-17	4.46789885538791e-17	3.75599678742936e-17	7.1105870861332e-17	5.00959751979124e-17	1.9734777729146e-17	5.35853498498879e-17	4.91508301183217e-17	3.30992094750392e-17	4.78734711385959e-17	4.22910331083851e-17	4.8831056081002e-17
2008013	22	4.65601213459788e-17	5.55475359322058e-17	4.13501390072617e-17	4.50622753596209e-17	5.64816260265577e-17	4.36187241263443e-17	4.09463339363345e-17	5.59071783023549e-17	4.54253345325248e-17	3.84287374842786e-17	6.64693105613193e-17	5.12409209648019e-17	1.49200444761453e-17	4.69059302867813e-17	5.02822399022249e-17	3.30953145103161e-17	5.26463055772632e-17	4.25275434317285e-17	5.09313766789939e-17
2008013	23	5.05467605356341e-17	5.43902129000939e-17	4.1597368037868e-17	4.42130880970949e-17	5.54544479533303e-17	4.07764920365875e-17	4.27314705036039e-17	5.7412826596855e-17	4.74792252283577e-17	4.01155566101203e-17	5.96288749000433e-17	5.32355092299672e-17	1.8287512995054e-17	3.66881425015886e-17	5.01012492013663e-17	3.42269032167229e-17	5.79636238185858e-17	4.34506120839956e-17	5.37778449584415e-17
2008014	0	5.5582009451582e-17	5.30857507504391e-17	4.18870692872302e-17	4.31447177420582e-17	5.29907660237344e-17	3.84672734901007e-17	4.53151695360524e-17	5.8426714016733e-17	4.97749760214968e-17	4.21557660598511e-17	5.01480485706076e-17	5.51555679710619e-17	2.44221134762468e-17	3.00964916028496e-17	4.85131877174219e-17	3.67713371979602e-17	6.10608754177165e-17	4.59074644251126e-17	5.57237284547836e-17
2008014	1	5.6448176536873e-17	5.14849655379887e-17	4.18811383918598e-17	4.22412822191468e-17	4.98205684458947e-17	3.66579592756325e-17	4.84309764618419e-17	5.77408054649045e-17	5.33473243297129e-17	4.50110666587756e-17	4.69326565547722e-17	5.73830691489241e-17	2.71579402311709e-17	2.58124080266377e-17	4.68337770419314e-17	4.0501813877625e-17	5.90929251829226e-17	5.07040786106671e-17	5.64557082971706e-17
2008014	2	5.56517797010213e-17	4.96996088077904e-17	4.21685367072857e-17	4.07278875874987e-17	4.6772765310713e-17	3.55215678057492e-17	5.20667388935274e-17	5.59679690618731e-17	5.64311907086972e-17	4.8201584428524e-17	4.52802809611341e-17	5.97225822427772e-17	2.94599505615742e-17	2.24716970131219e-17	4.39266427719791e-17	4.73977329464347e-17	5.4792639496288e-17	5.49638634665984e-17	5.46890435394448e-17
2008014	3	5.32477948584409e-17	4.78444927538117e-17	4.2669164127276e-17	3.90280955014726e-17	4.40647483343914e-17	3.51450175023652e-17	5.5021247338529e-17	5.28848523136466e-17	5.67590496479655e-17	5.06674503412501e-17	4.39701563195962e-17	6.19777417470538e-17	3.2463041380029e-17	2.2000308541927e-17	4.20294918379198e-17	5.18694501366846e-17	5.10191253300511e-17	5.66897062328661e-17	5.14688728565013e-17
2008014	4	5.02318870382449e-17	4.55782520978693e-17	4.33301662515729e-17	3.77451465231455e-17	4.20977136031725e-17	3.53029124434716e-17	5.2989055214373e-17	4.9583609384753e-17	5.55362519051736e-17	4.93819195363838e-17	4.41938605063176e-17	6.35232033904725e-17	3.58958548053813e-17	2.33998741809427e-17	4.07711980198933e-17	5.01948614490647e-17	4.75104798077572e-17	5.68338914673626e-17	4.74917393615449e-17
2008014	5	4.82444815192873e-17	4.40189427657853e-17	4.43043719051087e-17	3.66117874113768e-17	4.09442193269817e-17	3.58179459482105e-17	5.09220475993043e-17	4.70690150362496e-17	5.1767964173298e-17	4.79270259697683e-17	4.47618241131264e-17	6.32533677000112e-17	3.89739777579847e-17	2.52773251202299e-17	3.97692142799976e-17	4.86151174143767e-17	4.5169741054089e-17	5.53637987738165e-17	4.19006697740914e-17
2008014	6	4.6373508066326e-17	4.37874525764284e-17	4.54380024912259e-17	3.58837902003522e-17	4.08106361818114e-17	3.65100241432016e-17	4.85833171647372e-17	4.51419450654427e-17	4.82022378477503e-17	4.64123477449036e-17	4.53321640688758e-17	5.94807160888668e-17	4.08090823566034e-17	2.73004967491233e-17	3.92244624487958e-17	4.74846896321724e-17	4.47165697412418e-17	5.29241394178609e-17	3.50304805208053e-17
2008014	7	4.51753277301971e-17	4.07723718789969e-17	4.64315539053385e-17	3.53728348302353e-17	4.04345321259916e-17	3.70837749801525e-17	4.47627201369399e-17	4.4735481682247e-17	4.4814085208817e-17	4.54192355874657e-17	4.53261156401369e-17	5.16396718723147e-17	4.23785289293973e-17	2.98705913820612e-17	3.87128868216256e-17	5.0680580763017e-17	4.57568554119875e-17	4.83014114463056e-17	2.90538545203376e-17
2008014	8	4.29479750701331e-17	3.89718623922659e-17	4.66397836062428e-17	3.57972072992544e-17	4.06666749426603e-17	3.71018846013843e-17	4.30158786911376e-17	4.41681670392094e-17	4.2382340630215e-17	4.52058304462769e-17	4.51424815621619e-17	4.54642470111463e-17	4.30871709399594e-17	3.41048248534015e-17	3.81368646257798e-17	5.13409256288092e-17	4.72570917256782e-17	4.49040511091216e-17	2.37351575887313e-17
2008014	9	4.09710828693991e-17	3.94984561379932e-17	4.92551900828227e-17	3.93504472882458e-17	4.13906877847285e-17	3.69650640104505e-17	4.3786403763277e-17	4.36807614153282e-17	3.90312920681318e-17	4.44330979604346e-17	4.57300970067395e-17	4.23412381681304e-17	4.21668768430677e-17	3.61915131479914e-17	3.77238795741137e-17	5.09936013592699e-17	4.94720509101058e-17	4.15637045949286e-17	2.04460530990416e-17
2008014	10	3.94656902849203e-17	4.39350873259309e-17	4.96212146236428e-17	4.04193657238246e-17	4.3120500938204e-17	4.21948747078671e-17	4.26999924448012e-17	4.27276977103441e-17	3.5776216389173e-17	4.16197759014574e-17	4.67067231954084e-17	4.03449186026666e-17	4.14476890048287e-17	3.874038155026e-17	4.16938882565351e-17	4.97548146434626e-17	4.93711933370179e-17	3.24711232932059e-17	1.99723693886201e-17
2008014	11	3.75407906989502e-17	4.26406203583792e-17	5.26763659207883e-17	4.08395643173264e-17	4.34765035619732e-17	4.3768509477713e-17	4.02498362973977e-17	4.09754768928083e-17	3.71179552424029e-17	3.84001238381021e-17	4.77187051644991e-17	3.94955336048188e-17	4.11382022294877e-17	3.96192365393756e-17	4.1957471444363e-17	4.79321098711931e-17	4.86803215761764e-17	2.6951609282868e-17	2.40970609083597e-17
2008014	12	3.40881762638156e-17	3.95569549866346e-17	5.76305552104338e-17	4.06676057566032e-17	4.15738326477136e-17	4.37016805189996e-17	3.83400637014772e-17	3.92414174914754e-17	4.18193047219966e-17	3.60740544634784e-17	4.89216411121253e-17	3.96251049177065e-17	4.0547522125726e-17	3.92283750415739e-17	4.14288562066453e-17	4.65012984431745e-17	4.7660613069608e-17	2.80733371254497e-17	3.82068949172361e-17
2008014	13	2.99380813739555e-17	3.53732281720565e-17	5.98515991857705e-17	4.05854396630928e-17	3.98860552126766e-17	4.17687896144314e-17	3.67940150609543e-17	3.81276343809388e-17	4.31443543516985e-17	3.45065482478179e-17	4.79806694794699e-17	4.00572507868651e-17	3.83934792480385e-17	3.77329042546736e-17	4.05738401077346e-17	4.48772913114798e-17	4.63423110312695e-17	3.56157507065934e-17	5.80422768060246e-17
2008014	14	2.62655337042559e-17	3.12458180947501e-17	5.95929479726535e-17	4.01620494912965e-17	3.91140572977343e-17	3.95685102963137e-17	3.5263081921315e-17	3.69215083418719e-17	4.33846601350729e-17	3.21244591781548e-17	4.81675153372771e-17	4.03883654336823e-17	3.62383413311689e-17	3.45428192871599e-17	3.83743488921589e-17	4.43325107833554e-17	4.49819549674265e-17	4.05443105952679e-17	8.08565782146317e-17
2008014	15	2.4809013572721e-17	2.79611057153335e-17	5.70524107676115e-17	3.87051689407763e-17	3.87119219257343e-17	3.78651330322532e-17	3.33946816852087e-17	3.4360123235209e-17	4.04174746039383e-17	2.93427228013387e-17	4.59388028912689e-17	4.05966521687304e-17	3.4438490968865e-17	3.14198132099078e-17	3.64174528757549e-17	4.47755368345607e-17	4.41648021628033e-17	4.19309343412504e-17	7.43194315640568e-17
2008014	16	2.67634389092774e-17	2.59589548794714e-17	5.50238378425296e-17	3.61913116884599e-17	3.78663485606156e-17	3.68331192174598e-17	3.02078910719139e-17	3.08565927168593e-17	3.73083608499361e-17	2.65510523550806e-17	4.02606492914598e-17	4.11260012908612e-17	3.07876772486568e-17	2.94916166650226e-17	3.46329333576728e-17	4.39747666943597e-17	4.34467442759511e-17	4.04441292097042e-17	6.76902290402188e-17
2008014	17	3.15418581321382e-17	2.49712553662687e-17	5.27280166149199e-17	3.35342654868606e-17	3.59192880765899e-17	3.61974754397996e-17	2.78439555840305e-17	2.78410667558905e-17	3.51690668947261e-17	2.48298812887094e-17	4.33662602085023e-17	4.20272134161883e-17	2.33955773516734e-17	2.82594709206828e-17	3.31631482694551e-17	4.41241030190842e-17	4.26208790614144e-17	3.7012511752912e-17	6.00611274245116e-17
2008014	18	3.62918027869044e-17	2.47254386837543e-17	5.02740787675269e-17	3.16255914997675e-17	3.2923052299361e-17	3.58983875937608e-17	2.65456518689876e-17	2.60002795753554e-17	3.34910912479076e-17	2.38539320046653e-17	4.37558725646667e-17	4.26493140281465e-17	1.93139645364709e-17	2.80315503280363e-17	3.20265130087258e-17	4.54610880906689e-17	4.13856714554339e-17	3.42243989800856e-17	5.46513079406528e-17
2008014	19	4.19207427477074e-17	2.4976752154474e-17	4.82582448916221e-17	3.05817764186432e-17	2.98837125142303e-17	3.58779712689967e-17	2.55296830512407e-17	2.63209900027747e-17	3.13210360930474e-17	2.47189842784839e-17	4.16765681937576e-17	4.3822298063588e-17	2.20535722300086e-17	2.68202531693929e-17	3.11816404342734e-17	4.68671157552732e-17	4.06789859358078e-17	3.21919842971126e-17	5.48371761522387e-17
2008014	20	4.84503964665005e-17	2.55924729298476e-17	4.68326835384918e-17	3.00740943192436e-17	2.7795460004157e-17	3.61215171069739e-17	2.6538157938643e-17	2.80047180878737e-17	2.88131635895615e-17	2.77607775058461e-17	4.12323817150533e-17	4.45793557769146e-17	1.60317005619355e-17	2.69291219707738e-17	3.05573301839794e-17	4.73758259984394e-17	4.02458925249467e-17	3.03613913445582e-17	5.47819502802337e-17
2008014	21	5.35989737840133e-17	2.65350613021749e-17	4.50270752361498e-17	3.00186531967648e-17	2.70675434381016e-17	3.67718639359021e-17	3.03857777317979e-17	2.98039301909543e-17	2.70733992760733e-17	3.25695747545295e-17	3.99555247110964e-17	4.50304180917778e-17	9.02212990557513e-18	2.68741620364931e-17	3.02595474599901e-17	4.74945863089269e-17	3.96831446976956e-17	2.82772080547347e-17	5.38169316236848e-17
2008014	22	5.51296435986112e-17	2.73539090032601e-17	4.21443257978946e-17	3.02104901051583e-17	2.74977077449499e-17	3.75829271326863e-17	3.59751986462526e-17	3.32008901977543e-17	2.74935621689006e-17	4.56526210424404e-17	3.78275439345112e-17	4.51452814032307e-17	2.54601533198055e-17	2.36731028382361e-17	3.04610696397308e-17	4.77862021447403e-17	3.89723989876119e-17	2.76181485041954e-17	5.66824105450182e-17
2008014	23	5.48993189554524e-17	2.77596250284148e-17	3.95045373655717e-17	3.10429683267808e-17	2.8008466417118e-17	3.85282619277096e-17	4.15764260695623e-17	3.73114681938751e-17	3.0399126801134e-17	4.81278690898282e-17	3.77776587974031e-17	4.42544794698789e-17	2.86437073420913e-17	1.85823833928425e-17	3.11068265935381e-17	4.85043055315667e-17	3.8243067058399e-17	2.99129099105306e-17	1.07094511954983e-16
2008015	0	5.36601092091822e-17	2.75364034925476e-17	3.80298874420321e-17	3.16951613420292e-17	2.89544640022376e-17	3.94518558306988e-17	4.57341477614365e-17	3.91545256542051e-17	3.48554305764354e-17	4.69955537720188e-17	4.04055671336356e-17	4.32879056599976e-17	2.67088884221629e-17	1.29540707002602e-17	3.19282598891456e-17	4.93715852178489e-17	3.74215855614049e-17	3.39341151655735e-17	1.07277395217203e-16
2008015	1	5.16684457623359e-17	2.69755084353078e-17	3.67739744629869e-17	3.16182205031414e-17	3.03825070650739e-17	4.03921156290408e-17	4.54656327212433e-17	3.83616561680428e-17	3.79108373227231e-17	3.90890109878712e-17	4.30901317192627e-17	4.32882864996629e-17	2.2872674213249e-17	9.7882049368038e-18	3.27662199874966e-17	5.02133457444831e-17	3.65415212719532e-17	3.89008258133217e-17	1.06851356305173e-16
2008015	2	4.77047725933545e-17	2.63286441007664e-17	3.53427665669163e-17	3.1428435121386e-17	3.09235187929354e-17	4.11326441267045e-17	4.25600179231514e-17	3.70258654914662e-17	4.11945853536558e-17	2.95108732303797e-17	4.42250016305146e-17	4.43567042160573e-17	2.07239001900133e-17	1.25201504131012e-17	3.35668459897649e-17	5.07549225120864e-17	3.59319050125124e-17	3.98729660827392e-17	5.96995119469698e-17
2008015	3	8.36609731556918e-17	2.5960896508129e-17	3.42550080845638e-17	3.11951705985446e-17	3.05631076148763e-17	4.15910258786609e-17	3.69428666980247e-17	3.76254222139254e-17	4.21891538978954e-17	2.90768108480515e-17	4.42814430473279e-17	4.50629952099999e-17	2.30624131540762e-17	1.72589517589802e-17	3.41878508755402e-17	5.08599069956991e-17	3.58438520786298e-17	4.13941052187886e-17	5.14961401306415e-17
2008015	4	8.42670283296533e-17	2.59704588877328e-17	3.38669350952422e-17	3.066484918166e-17	3.00972595009254e-17	4.07139176279422e-17	3.40113578212593e-17	3.89262952252975e-17	4.17654910702091e-17	3.47319860335218e-17	4.32094093948691e-17	4.51217745504248e-17	1.06132548172183e-16	1.77087943049514e-17	3.45299886300988e-17	5.09381572858527e-17	3.59524488331146e-17	4.14295622044826e-17	4.44585094736344e-17
2008015	5	8.70173589354782e-17	2.60010278609649e-17	3.37641022471649e-17	2.97253698598863e-17	2.98985414193586e-17	3.85875400382426e-17	4.08156055471874e-17	4.22946376539896e-17	4.10002252080149e-17	3.9882771855209e-17	4.06430924177137e-17	4.50095369373139e-17	8.74270157925217e-17	1.4682954156929e-17	3.46146096232382e-17	5.07349203313389e-17	3.57763257363216e-17	3.91194126541598e-17	4.32096753106414e-17
2008015	6	1.07856853725319e-16	2.60795925971331e-17	3.36793034648176e-17	2.82425901231658e-17	3.08408134408944e-17	3.61770670565306e-17	3.15109758503998e-17	4.92009832192021e-17	4.19278793271031e-17	8.00827123616463e-17	3.86339491598127e-17	4.51958355158969e-17	9.12618192729458e-17	1.51522537956796e-17	3.45694873354175e-17	5.01682039558284e-17	3.51964638468789e-17	3.81538035216557e-17	4.35654718520168e-17
2008015	7	1.08008124252619e-16	2.72788762042027e-17	3.33195107275473e-17	2.68457055644797e-17	3.23549929670908e-17	3.39892570553728e-17	3.91085498665391e-17	5.34389111543093e-17	5.18322138847435e-17	6.27396781789585e-17	3.69718849734011e-17	4.51812278848904e-17	8.33074866039873e-17	1.72810487114215e-17	3.46315315723102e-17	4.93017968816675e-17	3.48537882937697e-17	4.25651686561358e-17	4.80497947241005e-17
2008015	8	5.88852956522103e-17	2.97325044654797e-17	3.34624213841834e-17	2.57378749061375e-17	3.32772429784638e-17	3.23285566029653e-17	4.59729621764278e-17	4.30770491911625e-17	5.92212951244532e-17	6.27666011485345e-17	3.35109573565079e-17	4.44861067991308e-17	6.00375109109545e-17	1.79245663016533e-17	3.49641494752185e-17	4.9902449070371e-17	3.48830478660331e-17	5.51993235150004e-17	5.09030838932578e-17
2008015	9	4.76650146205756e-17	3.36180168377964e-17	3.71975195370047e-17	2.60627447676539e-17	3.43613021004846e-17	3.12954373251814e-17	5.18273249646734e-17	4.24233283646442e-17	4.86985463136238e-17	5.43814090650203e-17	3.01110829488526e-17	4.3212468930553e-17	8.27483609553014e-17	1.45655747119287e-17	3.65864033175502e-17	5.00908916705267e-17	3.47718020671103e-17	4.91625384899146e-17	3.33005707470087e-17
2008015	10	4.02106184703878e-17	3.51817570361839e-17	4.11137459601567e-17	2.75471240773899e-17	3.47694285695898e-17	3.06103659925575e-17	4.86091058909414e-17	4.05104284901687e-17	4.02834718447107e-17	4.6473261973658e-17	2.99022779960894e-17	4.09359537720443e-17	6.674440461426e-17	1.53478064779942e-17	4.81596454620308e-17	4.96722529478894e-17	3.42417270184398e-17	4.47229528080762e-17	1.53714730182624e-17
2008015	11	3.88483332275743e-17	3.49527182663911e-17	4.17096776344686e-17	2.96878867707566e-17	3.40574125326038e-17	3.03022495045547e-17	4.41989815121923e-17	3.87168331360675e-17	4.08255499155571e-17	4.21887079638319e-17	3.00155135856282e-17	4.07106086942041e-17	6.04797949024204e-17	2.39472274608268e-17	5.59554070354377e-17	4.91025628372636e-17	3.32705188410843e-17	4.6165832358768e-17	1.78346630660716e-17
2008015	12	4.16017346552002e-17	3.46855780854858e-17	4.0373531344307e-17	2.9167515878137e-17	3.34403217718069e-17	3.10792143584433e-17	3.91227571764986e-17	3.79530369276561e-17	4.32534631328075e-17	3.48196102419911e-17	3.01581334226466e-17	4.24346272140452e-17	5.39571167372699e-17	2.91646760000608e-17	6.05510192076338e-17	4.88082734869842e-17	3.22559013179336e-17	4.67767412170548e-17	1.7809763604777e-17
2008015	13	2.7843988030492e-17	3.54531031806987e-17	4.03132629149241e-17	2.94314735591845e-17	3.30524690177311e-17	3.30801256286222e-17	3.29141355099749e-17	3.67470206316256e-17	4.19432906737031e-17	3.25574323842815e-17	3.10307561907524e-17	4.34193001431541e-17	5.72898659582565e-17	2.61866120783981e-17	5.96880722526707e-17	4.83924018192779e-17	3.15191871269635e-17	4.53969363818725e-17	1.38004327125019e-17
2008015	14	9.96672052304828e-18	3.49561330883972e-17	4.1724298644092e-17	2.99659619464907e-17	3.1736218089761e-17	3.54243076479572e-17	3.36323857927372e-17	3.48927152782624e-17	3.84450926624514e-17	3.04102718564996e-17	3.27043992298515e-17	4.31287921229645e-17	4.87170370772971e-17	2.13938610763018e-17	5.74152802413917e-17	4.81124677463638e-17	3.120266017793e-17	4.22432354599353e-17	1.1042217868721e-17
2008015	15	8.58115476953686e-18	3.25116145301649e-17	4.27083897523558e-17	2.99204128890292e-17	3.01299308237413e-17	3.72343033013878e-17	2.75775902025216e-17	3.14518756861515e-17	3.61388210680865e-17	1.20318105751006e-17	3.33904760223335e-17	4.19030455585791e-17	3.62176668755938e-17	1.71098803854657e-17	5.62914822465243e-17	4.85774188798982e-17	3.13711320219927e-17	3.80701055591454e-17	1.03840631826488e-17
2008015	16	6.49860551130575e-18	3.01792046241443e-17	4.24758974179881e-17	3.04216141393012e-17	2.96793808228557e-17	3.82975654357509e-17	1.2253258746951e-17	2.124839809767e-17	3.45264146325597e-17	4.73038063060026e-18	3.366470327599e-17	4.01744854715502e-17	1.51669068096401e-17	1.90673775399974e-17	5.16571557134336e-17	4.73710023175311e-17	3.19481452221171e-17	3.51087923967449e-17	9.63857122677033e-18
2008015	17	5.27607581326255e-18	2.88882681633489e-17	4.19744374826909e-17	3.18873354692022e-17	2.96471348394344e-17	3.91745321966667e-17	5.04452633801864e-18	2.24478823457115e-17	2.72013554400988e-17	4.04472692451054e-18	3.3233745738186e-17	3.83469157675151e-17	1.44796081527248e-17	2.84894521185088e-17	5.03187355890407e-17	4.65233000645764e-17	3.32126282933499e-17	3.23493580222946e-17	7.75069257216867e-18
2008015	18	5.20413681628706e-18	2.90396241196268e-17	4.16482571433855e-17	3.21640398227325e-17	2.92672577911512e-17	4.00089511967974e-17	4.69677302663949e-18	2.22491601367636e-17	1.19793117013561e-17	3.39677994311813e-18	3.39411688028653e-17	3.65420450050014e-17	1.08446847392288e-17	4.12237186241244e-17	4.95953507694919e-17	4.68339894773648e-17	3.50509264109981e-17	2.02015836321889e-17	5.06484084218362e-18
2008015	19	5.82493815031649e-18	3.03883470876185e-17	4.05657324383925e-17	3.20175615734227e-17	2.86339480715829e-17	4.18280567453631e-17	3.75255633104049e-18	2.27553218491921e-17	7.66379897731847e-18	7.70991029938443e-18	3.33806020669698e-17	3.52246993874064e-17	5.14003902321852e-18	4.05776595799305e-17	4.85456458586506e-17	4.74838892940873e-17	3.67468986660848e-17	8.54439808426398e-18	3.97873544954564e-18
2008015	20	6.04490115016661e-18	3.16825148723002e-17	4.04891288496274e-17	3.24468428031741e-17	2.80812577820963e-17	4.33742787051469e-17	3.71935665608769e-18	2.32346676828139e-17	8.07906722334487e-18	1.05674897756127e-17	3.21042453059422e-17	3.45505171943194e-17	2.3163762537298e-18	3.12217696268539e-17	4.7402822363552e-17	4.82033087089693e-17	3.73957995636383e-17	5.9807912370426e-18	5.4605737541371e-18
2008015	21	7.10601311631953e-18	3.19943123686941e-17	4.05878514144788e-17	3.33213538782739e-17	2.84700390320851e-17	4.35725805789042e-17	4.81402952655096e-18	2.39540288445789e-17	8.90566372036702e-18	9.2494787015089e-18	3.17494470737758e-17	3.46809807108008e-17	2.58579262847445e-18	2.37621743659426e-17	4.64883209125681e-17	4.91383063589491e-17	3.84084533591781e-17	5.73357326702937e-18	1.17909101723064e-17
2008015	22	6.6234008781656e-18	3.19336458704732e-17	3.98777818439795e-17	3.40698428648944e-17	2.93645223509362e-17	4.315703947647e-17	5.43132126987908e-18	2.40305926194567e-17	1.17753089937234e-17	7.97888038234168e-18	3.29838356466831e-17	3.54651455750325e-17	2.06273634930386e-18	1.97668663134986e-17	4.61597536587274e-17	4.96532662457029e-17	4.00344346792646e-17	6.38836408731449e-18	5.35404819153484e-17
2008015	23	5.03647282204336e-18	3.05188225150951e-17	3.95751774338854e-17	3.44673032253334e-17	2.99267890286996e-17	4.33001161495149e-17	6.90416350539653e-18	2.31496410961554e-17	1.38121350769275e-17	5.86518215960551e-18	3.51117723170283e-17	3.63739096980152e-17	6.5845269346543e-18	1.70947935465171e-17	4.65628648208536e-17	4.88429283562716e-17	4.26939233573506e-17	7.79589421059361e-18	1.07440048962569e-16
2008016	0	5.11445099985723e-18	2.38753438843313e-17	3.85043547738864e-17	3.46711434554634e-17	3.00812172157313e-17	4.37023918924791e-17	7.06469103773326e-18	2.07362831343047e-17	1.59037858846824e-17	2.90342653412438e-18	3.69663598257545e-17	3.70064056214782e-17	1.47438446093184e-17	1.45954479852961e-17	4.77508129843273e-17	4.7065372762629e-17	4.53675463760413e-17	9.2525140141778e-18	1.0725275645608e-16
2008016	1	1.34510789425353e-17	1.59841332875781e-17	3.37480956908755e-17	3.46381062903536e-17	2.97069036127407e-17	4.4305190079515e-17	4.85828600061595e-18	1.46271661908338e-17	1.66465874351963e-17	2.51027273718262e-18	3.57871314687429e-17	3.7568669755864e-17	1.54807932173854e-17	1.26464349423581e-17	5.06803181977603e-17	4.47944840564896e-17	4.63307409264505e-17	1.08920759723199e-17	1.07026187000632e-16
2008016	2	6.23888348791558e-17	1.36795708456138e-17	2.94028894946703e-17	3.2618952674709e-17	2.68470429855413e-17	4.38192378490998e-17	2.71297505148054e-18	9.45295404041569e-18	1.55308030940437e-17	4.73974198266855e-18	3.42390255350909e-17	3.82117273330368e-17	7.86000204550972e-18	1.08988632704941e-17	4.69026529369848e-17	4.28529055143425e-17	4.65305620920357e-17	1.22181794974252e-17	1.06828865905872e-16
2008016	3	8.43051976084163e-17	1.45982326135592e-17	2.83622700368031e-17	2.77734158911562e-17	2.11143300158335e-17	4.23911521383155e-17	4.61336124439348e-18	1.31969333434254e-17	1.21657226027054e-17	1.27185530435187e-17	3.30125841279784e-17	3.90988541133559e-17	3.92072052752964e-18	9.16823007011492e-18	4.57534500625115e-17	4.0229774196269e-17	4.65703534801819e-17	1.16397551297656e-17	9.68118905437595e-17
2008016	4	5.92178858426265e-17	1.57660789657076e-17	2.52824001210855e-17	2.37070706675002e-17	1.67811782025413e-17	3.85265866678731e-17	2.0103168685279e-17	3.39613689283264e-17	8.08563250045483e-18	4.9397795683307e-17	3.14725517212363e-17	4.05951621952464e-17	2.08262357013949e-18	7.4700491369234e-18	4.51296680195176e-17	3.66609383736862e-17	4.67753054587648e-17	9.10726949288537e-18	9.85728487592299e-17
2008016	5	5.03962289860915e-17	1.76565921128881e-17	2.37064011232171e-17	2.07805307278989e-17	1.74314444555191e-17	3.071276377432e-17	4.7480967032238e-17	4.59476258054366e-17	1.12189059590093e-17	4.85944876959674e-17	3.2573672135864e-17	4.26329760233294e-17	1.4307074008676e-18	5.71647130290445e-18	4.40242045515406e-17	3.22832825447304e-17	4.61353615347588e-17	7.09060073509629e-18	1.06862254649014e-16
2008016	6	4.47531539918304e-17	2.11667133903268e-17	2.45013360346414e-17	1.81195838539227e-17	1.89121595696898e-17	2.08344139448773e-17	4.40802267447975e-17	4.88438934957697e-17	3.10146888550735e-17	3.67020367312875e-17	3.4515702212791e-17	4.52753152872696e-17	2.65495374070833e-18	3.91803683286253e-18	4.36069854768594e-17	3.04706065314917e-17	4.44059952910515e-17	1.53234790733523e-17	1.0692105718088e-16
2008016	7	3.93665428153494e-17	2.41713344134844e-17	2.90987187196858e-17	1.59906914447436e-17	2.01909904027609e-17	1.42400222852262e-17	3.1750408337021e-17	5.47367241510277e-17	4.9800773188513e-17	2.78977036532477e-17	3.61594963071293e-17	4.78559641296336e-17	1.15357395137402e-17	2.58262412408741e-18	4.39454770886447e-17	2.94591781090707e-17	4.20948960092552e-17	3.69755773782607e-17	1.06892928980256e-16
2008016	8	4.42499754111269e-17	3.0106404619508e-17	3.24510736703916e-17	1.50864383585204e-17	2.291596627082e-17	1.20074677160599e-17	2.28422038937788e-17	7.26152775016401e-17	5.07424100158267e-17	1.98380919043446e-17	3.69173293715857e-17	4.98777146797318e-17	2.5117614922624e-17	1.86176053831646e-18	4.4397441490362e-17	3.01662202492182e-17	4.02702270814365e-17	4.78655888534705e-17	1.06843639171157e-16
2008016	9	5.06513398303887e-17	4.6711642345983e-17	5.98663737942585e-17	1.50847811623552e-17	2.74849315191124e-17	1.17368864792593e-17	2.45205823834619e-17	1.06635508503076e-16	4.46346893995593e-17	2.71534880762908e-17	3.75150222900139e-17	5.13924791952679e-17	8.02531636140892e-17	1.44077380747859e-18	4.64685884205532e-17	3.19171438941798e-17	3.8416521129566e-17	4.42985472993374e-17	1.07111116183062e-16
2008016	10	5.26877151349509e-17	6.48193390856437e-17	6.74772803604495e-17	1.52032597348563e-17	3.27876456853959e-17	1.28887868277317e-17	3.1015834419429e-17	9.31570541776889e-17	4.3386169861172e-17	3.29925458416762e-17	3.8334433655237e-17	5.29763820179432e-17	6.80934171246697e-17	1.41999772343631e-18	5.17486704070678e-17	3.175442892015e-17	3.63144896640673e-17	3.80336695069946e-17	1.07147805851774e-16
2008016	11	5.58679327269664e-17	7.30104731356342e-17	7.90492094139448e-17	1.83193451647986e-17	3.90223604509451e-17	1.64050647613288e-17	3.63523318360237e-17	9.11693035698285e-17	4.68157446477235e-17	3.39285912012794e-17	3.78245720409049e-17	5.42223145570309e-17	5.91136684319924e-17	2.45304826118196e-18	5.17506124511421e-17	3.01522758721838e-17	3.45883812274356e-17	3.67021558366816e-17	1.06637118744285e-16
2008016	12	6.6653145775633e-17	1.05286427072684e-16	6.38613105357066e-17	2.69968489658683e-17	4.76014305137777e-17	2.43415510933871e-17	3.79067302627381e-17	8.48623349626326e-17	5.04625154088836e-17	3.52058820138729e-17	3.47952167006658e-17	5.49894744136447e-17	4.4624286988652e-17	6.94525521090208e-18	5.09685963214561e-17	2.79276327295381e-17	3.31795546637814e-17	3.75507799901535e-17	1.06125879738468e-16
2008016	13	7.76466868261978e-17	6.53475973981733e-17	5.25649725619402e-17	3.93048173476917e-17	5.62462613951331e-17	3.55036151658975e-17	4.11671065616121e-17	1.0684412819354e-16	5.20240593706978e-17	3.84638550640212e-17	3.25866184422663e-17	5.51198323590743e-17	3.59162443417405e-17	7.74030246524697e-18	5.03503544559423e-17	2.59059978534712e-17	3.17265824408529e-17	4.06913257070764e-17	1.05629440568247e-16
2008016	14	8.30019258964904e-17	5.84373931068164e-17	4.89450004138213e-17	4.76711918812169e-17	7.25777008984266e-17	4.25842483955322e-17	4.55260447783007e-17	1.06841419766372e-16	5.18221024143869e-17	4.27927350138715e-17	3.32275983565571e-17	5.4722894541081e-17	1.52269677229306e-17	5.65775244435611e-18	4.96512904515737e-17	2.47647593988532e-17	3.03742843216702e-17	4.25227406818705e-17	1.05686126033084e-16
2008016	15	8.82940878128607e-17	5.39437050783508e-17	4.44684167512682e-17	5.2275279592466e-17	7.0548989115878e-17	4.48103281956199e-17	4.94317950856552e-17	1.06959098749658e-16	5.24102067506064e-17	4.50291678466096e-17	3.28090601958947e-17	5.37503492066001e-17	1.86282927747627e-17	4.36359473391538e-18	4.89796725417896e-17	2.45196197053576e-17	2.89658443409079e-17	4.43555173303589e-17	7.09978345544197e-17
2008016	16	9.17392348630665e-17	5.12229080134412e-17	3.91569596088912e-17	5.09968991198235e-17	6.45955895015347e-17	4.33808054078802e-17	5.55665760101229e-17	1.06986317616541e-16	5.62179091127724e-17	4.68055269200272e-17	3.33680563385564e-17	5.26972922185709e-17	1.39087207635893e-17	3.57887305921446e-18	4.76166829496853e-17	2.32304796974593e-17	2.70664460696109e-17	4.69571017167757e-17	5.92848761079118e-17
2008016	17	9.11201145052548e-17	4.87554064509859e-17	3.44863643980867e-17	4.80718390862148e-17	1.0645455287707e-16	4.14538176980535e-17	5.89325891029626e-17	7.90923157751182e-17	6.16027844338208e-17	5.7280563226844e-17	3.40884608307504e-17	5.15155111261445e-17	1.42802452628872e-17	3.51541586588519e-18	4.70863914349118e-17	2.2231531331251e-17	2.5281805170846e-17	5.16454079314038e-17	5.17525290705586e-17
2008016	18	8.49795189370903e-17	4.64330599242086e-17	5.69602780888205e-17	4.63528292651392e-17	1.06318216208707e-16	3.95850828801006e-17	6.04638807592295e-17	7.26044138064534e-17	6.41338774230137e-17	5.28125557177089e-17	3.4435889727822e-17	5.04948429839236e-17	1.04971612202597e-17	4.36151188457102e-18	4.68401856578334e-17	2.18071362359367e-17	2.39441012631024e-17	5.72762183011819e-17	4.7953111964227e-17
2008016	19	7.24972953739378e-17	4.40751089929895e-17	7.39929843407534e-17	4.46946684776746e-17	6.42585793794574e-17	3.69082397715369e-17	5.60109737666869e-17	6.68387980715286e-17	6.90915106090942e-17	3.45308960349478e-17	3.43336430230556e-17	4.96630307470438e-17	7.40730536621266e-18	5.86564750719506e-18	4.66179831482356e-17	2.16569663810902e-17	2.31162424245347e-17	6.15351121995489e-17	4.67528316154906e-17
2008016	20	5.82834443005186e-17	4.38905721955836e-17	7.22572081342938e-17	4.34316923023692e-17	5.94728692146318e-17	3.45785904181677e-17	4.77203586911308e-17	6.06109372881717e-17	7.19466912395256e-17	3.35353139103066e-17	3.30210319660597e-17	4.91930954228957e-17	3.73620795335701e-18	7.29479879152954e-18	4.63305172795578e-17	2.16069630061855e-17	2.52536914786707e-17	6.48184239289267e-17	4.63200046502559e-17
2008016	21	4.86004469903513e-17	4.32812402993322e-17	7.41720216882506e-17	4.25535012255117e-17	5.44103418701047e-17	3.23794477662176e-17	3.48181943717958e-17	5.71166634244512e-17	6.70019888570316e-17	1.07894602191007e-19	2.93584955782736e-17	4.85620813764896e-17	8.35839379827533e-18	8.35941629768201e-18	4.62398673562464e-17	2.17626250626059e-17	3.05352222567282e-17	6.04265087887849e-17	4.62550334578054e-17
2008016	22	4.61740892478566e-17	4.27728147922121e-17	6.78120917719262e-17	4.14847734350802e-17	5.09636793942733e-17	3.07897618643383e-17	3.92653868844859e-17	5.55207022793728e-17	5.59255288817446e-17	2.4731017777191e-17	2.51826350838592e-17	4.72853527912836e-17	6.09609554730496e-18	1.12224673282635e-17	4.64545114260573e-17	2.22523876938283e-17	3.56669580259563e-17	4.58651861914594e-17	4.85809315946529e-17
2008016	23	3.75007342580984e-17	4.34080873864532e-17	4.88092894217607e-17	4.0856709171129e-17	4.88738592784415e-17	2.8910002059875e-17	3.78204378042818e-17	5.34965349542127e-17	4.81919759611799e-17	1.53551107861455e-17	2.36757574269027e-17	4.56141205752398e-17	5.20511492736047e-18	1.56597215399583e-17	4.70436540769787e-17	2.34681303775675e-17	3.83576821114527e-17	3.32685798433423e-17	5.24534253653813e-17
2008017	0	2.75585361984846e-17	4.19361708523805e-17	4.08396779001664e-17	4.01838100769598e-17	4.72100147130051e-17	2.72355174992156e-17	3.10764786795468e-17	5.06154978603059e-17	4.27826033002362e-17	1.25596279300298e-17	2.70344315633293e-17	4.43623159690177e-17	5.82033939719484e-18	2.08475428254083e-17	4.79964116126643e-17	2.51584718019231e-17	4.00292324106178e-17	2.55318516623776e-17	5.51665806985954e-17
2008017	1	2.17099142818271e-17	3.98256776045149e-17	4.342263276013e-17	3.98002664979959e-17	4.57453958054768e-17	2.66216007176672e-17	2.11544506290615e-17	4.85883658765518e-17	4.1323014863636e-17	1.16110133501475e-17	2.86907879393305e-17	4.39073610844825e-17	7.09565868661552e-18	2.62078494072179e-17	4.88800305239832e-17	2.68724097055147e-17	4.21171653292274e-17	2.29672739513185e-17	5.73440566233344e-17
2008017	2	1.98915066158579e-17	3.78254455814458e-17	4.66059818979284e-17	3.91705373055722e-17	4.48172316568429e-17	2.6697895160587e-17	1.54247517141366e-17	4.70532167054566e-17	3.5628579556978e-17	1.11048596411398e-17	3.00136585282929e-17	4.40862491103972e-17	7.50423249820562e-18	2.93850052589404e-17	4.98249535078757e-17	2.8379815084772e-17	4.40797853744204e-17	1.9330089771626e-17	5.92558059174561e-17
2008017	3	1.8997827074269e-17	3.63067145234996e-17	4.46103005274557e-17	3.73863407767187e-17	4.43907474996407e-17	2.70481491569522e-17	1.2019120547384e-17	4.49966803814795e-17	2.63273755654212e-17	9.50006160819512e-18	3.37722069191809e-17	4.41244937573101e-17	7.4771881643305e-18	2.96029739125331e-17	5.10908902757012e-17	2.93096102334139e-17	4.56653436002507e-17	1.53283799583182e-17	6.04463843979774e-17
2008017	4	1.82284989807651e-17	3.5932691754586e-17	4.07648484149855e-17	3.54925705006801e-17	4.44575446848763e-17	2.74153221346266e-17	1.01200755323034e-17	4.29014138359606e-17	1.94103650957046e-17	7.79831454725106e-18	3.55994734485723e-17	4.34575650334651e-17	8.86118711921111e-18	2.88520840037243e-17	5.28895275111782e-17	2.95076651997195e-17	4.77904732785473e-17	1.26977206183677e-17	6.05553823094288e-17
2008017	5	1.83605466670532e-17	3.76816492866556e-17	3.69737785124322e-17	3.2947952558135e-17	4.40061904463613e-17	2.7761248707221e-17	8.53272558818769e-18	4.12190973439273e-17	1.52426074397266e-17	6.5243317491224e-18	3.87730324546951e-17	4.23944048583764e-17	1.0022261447823e-17	2.84251092156083e-17	5.33962512730157e-17	2.98046126913718e-17	4.87273675020645e-17	1.16177774874086e-17	5.75801466512918e-17
2008017	6	1.92326717480352e-17	4.10532603971086e-17	3.01989809399712e-17	3.12390831736144e-17	4.2811873281476e-17	2.82597965883514e-17	7.14216970734927e-18	3.99339940570604e-17	1.25515833744287e-17	5.98329318750439e-18	4.48344744042004e-17	4.13781261353237e-17	1.02220690215248e-17	2.79069134773481e-17	5.35976868210025e-17	3.05669943180881e-17	4.69971989120505e-17	1.07324414369255e-17	5.3997561742524e-17
2008017	7	1.96310289554266e-17	4.43265831351998e-17	2.5562579301562e-17	3.05422931264132e-17	4.1324968826748e-17	2.89040919645566e-17	6.57560539444276e-18	3.92731818575961e-17	1.05435095471776e-17	6.09623776694966e-18	4.72008447225879e-17	4.01824027240377e-17	9.62545582532664e-18	2.71013174533091e-17	5.37251270263749e-17	3.15120412938299e-17	4.44725669752513e-17	9.53606086660444e-18	5.01031070399861e-17
2008017	8	2.17829258871412e-17	4.60610639915316e-17	2.68105945061733e-17	3.04548159754159e-17	3.95829139852044e-17	2.9833370574755e-17	6.30376578106166e-18	3.93130446039732e-17	9.26705835683839e-18	6.63206060014798e-18	4.74544518685329e-17	3.89529503067528e-17	8.60026126575666e-18	2.59104187165904e-17	5.37827922326731e-17	3.26411264057753e-17	4.23098948058293e-17	8.4029797434433e-18	5.02268439102509e-17
2008017	9	2.75423084997229e-17	4.81606508159194e-17	2.95881026430197e-17	3.13324164799147e-17	3.79430107264593e-17	3.33385946501803e-17	6.60037779803274e-18	3.99986952340363e-17	8.52990275017158e-18	7.48589636324866e-18	4.53126446848647e-17	3.80598150207013e-17	7.58904308360523e-18	2.38396868683272e-17	5.36756063789842e-17	3.38889855355752e-17	4.15222387536001e-17	7.50029642070121e-18	5.95532637563747e-17
2008017	10	3.47769514076413e-17	4.86755594566883e-17	3.13620694677131e-17	3.18519882094003e-17	3.68485368317193e-17	3.40877041593502e-17	7.85635326917371e-18	4.13215874884916e-17	8.4313409026489e-18	8.81289132809135e-18	4.30854723610419e-17	3.7310814513709e-17	6.81210759254769e-18	2.07134342444612e-17	5.3524920571603e-17	3.5377721922248e-17	4.14482281772961e-17	6.78776213035017e-18	1.12020944392305e-16
2008017	11	4.22701316130564e-17	4.65974090489469e-17	3.3540671448038e-17	3.26872790034485e-17	3.53875593218717e-17	3.26823682095751e-17	1.00683865958295e-17	4.2514261686657e-17	9.45276024423747e-18	9.91454977263033e-18	4.12940653847978e-17	3.6417321538309e-17	6.17294127291739e-18	1.75871729619518e-17	5.33009785815025e-17	3.58389826510345e-17	4.11252694994473e-17	6.59010915608549e-18	7.38807921007483e-17
2008017	12	4.87580669282681e-17	4.47493035188739e-17	3.60274122468376e-17	3.46578734969318e-17	3.42788376361776e-17	2.85142003833559e-17	1.27029282856101e-17	4.3668548617049e-17	1.23281697909096e-17	1.22579048882542e-17	3.94663206608971e-17	3.56664993065877e-17	5.57031480494679e-18	1.50835951010506e-17	5.30511991465704e-17	3.46687016913249e-17	4.06737740485408e-17	6.62541985685557e-18	5.99649996520136e-17
2008017	13	5.10120518780876e-17	4.10584963559989e-17	3.83310479063429e-17	3.54565311159058e-17	3.50188239844887e-17	2.42418135174674e-17	1.67571380453876e-17	4.43027908852341e-17	1.68228393838357e-17	1.67144258307712e-17	3.79432943598795e-17	3.5093245483374e-17	5.00093350370998e-18	1.32159210060326e-17	5.294240765455e-17	3.38541485298136e-17	4.04844049296266e-17	7.70875207114875e-18	5.63619910844743e-17
2008017	14	4.05201423390599e-17	3.94001220880075e-17	4.02702191252183e-17	3.46228364134403e-17	3.56146569614238e-17	2.40231769177836e-17	2.24182561491258e-17	4.38879771788732e-17	2.13848581541281e-17	2.24533190076741e-17	3.58936229829656e-17	3.4686170529258e-17	4.62577966045179e-18	1.18115244256026e-17	5.31040954416981e-17	3.33755705265253e-17	4.12618485610156e-17	1.04476239221163e-17	3.58453241580894e-17
2008017	15	3.72887488605735e-17	3.59754839280295e-17	4.13138768537923e-17	3.34282092534174e-17	3.79003894428682e-17	2.71260219187057e-17	2.89068096388556e-17	3.93652411104661e-17	2.71642440690587e-17	2.88168050213629e-17	3.20995059222117e-17	3.45067068386637e-17	4.66800665828675e-18	1.07537134464672e-17	5.32353217098029e-17	3.22804640977592e-17	4.10604374554936e-17	1.43864932544153e-17	2.52772523590682e-17
2008017	16	4.01066954362376e-17	3.4188026074444e-17	4.16440466044038e-17	3.28264062647218e-17	3.92758971880123e-17	3.03551334034464e-17	3.48082310752648e-17	3.77169525596611e-17	3.47723933046027e-17	3.28195783839785e-17	2.90292523519166e-17	3.47550451127079e-17	5.1100367417508e-18	9.80229964990661e-18	5.23531753322863e-17	3.0608775373368e-17	4.02319755417775e-17	1.89611846204579e-17	1.23120741958863e-17
2008017	17	4.1927132094411e-17	3.68229739797305e-17	4.06855402217261e-17	3.28933833678648e-17	3.94412112137911e-17	3.12273360259086e-17	3.55849289071008e-17	3.68150504028068e-17	4.17490729947285e-17	3.288492817329e-17	2.73416526837917e-17	3.49797821988861e-17	5.54685672336149e-18	8.9685125172465e-18	5.0838006427558e-17	2.96652006129849e-17	3.87588341011451e-17	2.51697573920086e-17	3.19112052236994e-17
2008017	18	4.36267064934368e-17	3.91285151416365e-17	3.91462337971387e-17	3.20955927770761e-17	3.90719386405813e-17	3.05975247892736e-17	3.09073929257005e-17	3.35290988431409e-17	3.58146542600026e-17	3.084960503433e-17	2.77817189023144e-17	3.49355599799429e-17	6.02798830106138e-18	8.32782990149024e-18	4.99732518525293e-17	2.85553797625238e-17	3.77624068725075e-17	3.21936067345657e-17	6.68595112656783e-17
2008017	19	4.16400422494535e-17	3.91624207848576e-17	3.67155173341216e-17	3.33256020598458e-17	3.72219775762557e-17	2.97940539047636e-17	2.96131843046024e-17	3.06131558252493e-17	2.07427744351515e-17	3.01080728576699e-17	2.81173737507348e-17	3.5331838315895e-17	6.86751851482373e-18	7.79665018557217e-18	4.98222539979629e-17	2.75274472013038e-17	3.60347789383526e-17	3.33702556574925e-17	1.06097326958912e-16
2008017	20	2.69469693671563e-17	3.51035071228543e-17	2.4234601673476e-17	3.55764873280151e-17	3.45218289292722e-17	2.9583855336251e-17	3.08443266716982e-17	3.2635679473041e-17	2.31355900069677e-17	3.03040623660397e-17	2.83568778686578e-17	3.63738683961062e-17	8.57080859703334e-18	7.33285668786464e-18	5.00150113064974e-17	2.64845920561107e-17	3.36289020020655e-17	2.49256054132643e-17	1.06769721082418e-16
2008017	21	1.10317165491266e-17	1.82798796230931e-17	1.31184991957598e-17	3.50904551773734e-17	3.40525458035741e-17	3.13081476619583e-17	3.05747070051894e-17	3.58125135105419e-17	3.1183646401235e-17	2.78519008488087e-17	2.90262909970133e-17	3.76449228082883e-17	1.18067897117694e-17	6.95319902754867e-18	5.00816481316146e-17	2.57662242661211e-17	3.19929751767777e-17	1.43492507204601e-17	1.07010815055414e-16
2008017	22	6.3486835169763e-18	1.18357035119015e-17	7.65238628161997e-18	3.15212713671045e-17	3.49090574266929e-17	3.23647260665215e-17	2.80952480296383e-17	3.52480785381461e-17	3.30010340736028e-17	2.25656148280832e-17	2.99732884343159e-17	3.92837107782718e-17	1.63287480704145e-17	6.66781649742578e-18	5.01975510836936e-17	2.5565425684819e-17	3.04770141720689e-17	2.01642057597814e-17	1.06953703308963e-16
2008017	23	7.17082714182763e-18	1.08486908036865e-17	8.12344926930519e-18	2.83519380551142e-17	3.46796008266119e-17	2.41704444881678e-17	2.7117066819158e-17	2.54923310571293e-17	3.09480720108883e-17	1.67041948502024e-17	3.02545756447052e-17	3.93820325534241e-17	1.92578522687706e-17	6.41660067866937e-18	5.03513962368941e-17	2.61684304192829e-17	2.8992406259298e-17	2.84969136139347e-17	6.76700215278378e-17
2008018	0	3.06279146320831e-17	1.44006327656469e-17	1.05809076818886e-17	2.08402699416842e-17	3.06851499269105e-17	2.31503874612004e-17	2.57824919114228e-17	1.4054160777559e-17	2.23407081513108e-17	1.08257320919683e-17	3.09314359811883e-17	3.92110016422948e-17	1.87966554860602e-17	6.23450702611702e-18	5.03408589268446e-17	2.74865775266937e-17	2.83312845714567e-17	3.0292834708359e-17	6.71118482843804e-17
2008018	1	5.89807465042639e-17	1.86005517662143e-17	1.79789567159895e-17	1.52485809684888e-17	2.30303010099248e-17	1.96557889156568e-17	2.01035447631505e-17	8.08046866795492e-18	2.30478102336392e-17	7.35232732536157e-18	3.30416630245999e-17	3.93762960511999e-17	1.85831827368681e-17	6.07486986647396e-18	5.00410358522977e-17	2.9303467352108e-17	2.86363391582263e-17	1.97698036730246e-17	8.00111411787498e-17
2008018	2	1.08747828388993e-16	1.63183684523666e-17	2.89830237269135e-17	1.15556152646746e-17	1.5043985750521e-17	1.51253754168493e-17	1.40234794063892e-17	9.70975738635008e-18	2.65764923596757e-17	6.66488090995151e-18	3.56345711082726e-17	4.02165729917692e-17	1.94985750439337e-17	5.95921092988175e-18	4.94893240724167e-17	3.1285701216548e-17	2.97771775797527e-17	1.16406560169814e-17	1.06810680144463e-16
2008018	3	1.09254496873981e-16	1.39062070699729e-17	1.07845384783601e-16	1.22709844172466e-17	9.09548044391128e-18	1.17197858755726e-17	9.94380619751308e-18	2.14634529340191e-17	2.54077935720755e-17	8.46065582052982e-18	3.70171968251466e-17	4.13345600120259e-17	1.98004419278984e-17	5.8915491860063e-18	4.87987087618965e-17	3.30784277328788e-17	3.13460066940933e-17	1.74659762199913e-17	1.06605197784226e-16
2008018	4	1.09567943571565e-16	3.80539829884548e-17	1.07929259127894e-16	1.21773268906363e-17	1.16218957016396e-17	1.06546345095714e-17	8.55123036265228e-18	3.60907225913346e-17	2.01787401248035e-17	1.46076307434727e-17	3.80842436858304e-17	4.20618114595243e-17	1.87829867460901e-17	5.84771544208386e-18	4.80258747733937e-17	3.42977983626149e-17	3.29973244025009e-17	2.08056435077898e-17	1.06446179925099e-16
2008018	5	1.10261559505793e-16	4.97849773300334e-17	1.06513081693943e-16	1.06705502106051e-17	1.86473177198915e-17	1.7567166378073e-17	1.06951518152054e-17	3.87078096042071e-17	1.45162455407918e-17	3.25300453238631e-17	4.20054874977046e-17	4.23606811113031e-17	1.68006792856091e-17	5.81521601983756e-18	4.71616049039491e-17	3.53749928145751e-17	3.33267620070751e-17	1.90587850346025e-17	6.65564690416446e-17
2008018	6	1.10229521236678e-16	3.32517834292968e-17	7.2385042848045e-17	1.04761161527843e-17	2.27465855824479e-17	3.76462017312024e-17	1.72829256170067e-17	3.20954485748563e-17	1.08891756159253e-17	7.22427545797211e-17	4.34785606432993e-17	3.65964411287e-17	1.49287675222691e-17	5.81005455148685e-18	4.63022086613223e-17	3.31029451123918e-17	3.12156827688729e-17	1.56664383627014e-17	5.83699641202981e-17
2008018	7	1.10279969124321e-16	3.72547047548351e-17	4.53672849578302e-17	1.77273982058688e-17	2.03608588863667e-17	4.6141001429071e-17	3.60783051678956e-17	3.60036901739914e-17	9.94467230084278e-18	7.54794887244429e-17	4.34390921150028e-17	3.10451616596462e-17	1.36399432523772e-17	5.89905767970379e-18	4.56180171235464e-17	3.10135670738582e-17	2.69994879797361e-17	1.24694920567869e-17	5.7579319223166e-17
2008018	8	6.33772784549235e-17	1.05609568829252e-16	3.24885865756531e-17	2.45573881207012e-17	1.75444746363584e-17	3.36449369191488e-17	6.51975992651674e-17	6.61819641303502e-17	1.11146439277536e-17	5.86205159521654e-17	4.24610127993276e-17	3.32408266453541e-17	1.30439914841043e-17	6.01905237777468e-18	4.51143258596213e-17	2.46204346170947e-17	2.29865038433171e-17	1.06737513951152e-17	5.47227247235171e-17
2008018	9	5.2273700703775e-17	1.0570780538816e-16	2.91327804089915e-17	2.80025569462818e-17	2.00445336207873e-17	3.18782303487354e-17	7.88423880677307e-17	1.13784701849559e-16	1.4228695026638e-17	4.15082645024168e-17	4.13123726540987e-17	3.58857708693579e-17	1.26142756957156e-17	6.09504984053102e-18	4.47347048992275e-17	2.28404641901865e-17	2.0087211853287e-17	9.74708884225296e-18	5.26461778102522e-17
2008018	10	4.892858152385e-17	1.05690446840142e-16	3.41689157028397e-17	4.5115747091474e-17	3.49517407195019e-17	5.80229986444596e-17	7.34027339595692e-17	1.12866099828322e-16	2.31313021385213e-17	3.11814151778831e-17	4.03704169438952e-17	3.48588138065845e-17	1.21249515420254e-17	6.41649972075539e-18	4.42085884462158e-17	2.39154344440564e-17	1.79004748357671e-17	9.53927646254571e-18	5.19519724680438e-17
2008018	11	4.84156153289105e-17	5.82476380128176e-17	3.97924124505803e-17	1.07148400611739e-16	5.24022722053296e-17	1.05674443115185e-16	4.58411431820324e-17	7.44502724970417e-17	4.32436716808619e-17	2.67329921338742e-17	4.00175923333705e-17	3.83461555910631e-17	1.18489304575137e-17	6.99315822328655e-18	4.29042290054866e-17	2.24029825904066e-17	1.66572466761602e-17	1.08934768315078e-17	5.35439170184354e-17
2008018	12	4.95612235581633e-17	4.75412992539422e-17	4.36826105037624e-17	1.06771865979618e-16	1.16987825600431e-16	8.02112638465212e-17	2.95116466473017e-17	5.43851867489176e-17	6.10683458620502e-17	2.69669324477697e-17	4.01606463012939e-17	4.05208813832727e-17	1.16998267271558e-17	8.26618097166669e-18	4.04818164698377e-17	1.93004276895133e-17	1.54257422550626e-17	1.58586128636602e-17	5.48864003045474e-17
2008018	13	4.79155175120427e-17	4.51271223354621e-17	4.42369738060335e-17	1.06192695802415e-16	9.94065459819613e-17	4.30244860583897e-17	2.70313067039092e-17	4.96855326426842e-17	6.15848398579658e-17	2.95298614865874e-17	4.02046483772994e-17	4.12445985993788e-17	1.16828189785064e-17	9.86854377520587e-18	3.74915165934564e-17	1.52793892244277e-17	1.39141931058032e-17	2.74348013223771e-17	5.45353762466573e-17
2008018	14	4.64723394138269e-17	4.58120109983906e-17	4.30186989767584e-17	5.88131494460132e-17	6.27444551293286e-17	3.15201624964617e-17	2.8226998970796e-17	4.9109182679762e-17	4.87262891474011e-17	3.17351035784101e-17	3.75209447823675e-17	4.14435047840067e-17	1.26492245125451e-17	1.13935591382663e-17	3.46643322536339e-17	1.40989595968785e-17	1.28287202036459e-17	4.04249529582115e-17	5.25652499644454e-17
2008018	15	4.60980585406259e-17	4.77104467822331e-17	4.14232651721707e-17	4.80893075031735e-17	5.48725568996746e-17	3.11423965173506e-17	3.01933712929519e-17	5.06606363277474e-17	3.6895756662626e-17	3.30754973337266e-17	3.26528500752095e-17	4.14545697602674e-17	1.45698424850701e-17	1.30798880734098e-17	3.2456858178782e-17	1.41822682081569e-17	1.39258040597233e-17	4.27489523870015e-17	4.79690162394757e-17
2008018	16	4.82691483626025e-17	4.52313780207783e-17	3.9457739136636e-17	4.45043354188197e-17	5.25975404263372e-17	3.27981976699686e-17	3.13455559148887e-17	5.05491064734239e-17	3.20297658427868e-17	3.42902464394232e-17	2.65017459332738e-17	4.12351075759408e-17	1.67620839252735e-17	1.39233262259011e-17	3.06647832357159e-17	1.56339335750244e-17	1.88693283467842e-17	3.62165246782119e-17	1.2686857681241e-17
2008018	17	5.14840448868178e-17	4.31931047053858e-17	3.79937135226945e-17	4.29919171906049e-17	5.21620795539344e-17	3.35183404554651e-17	3.29671665161825e-17	5.02132391362019e-17	3.22142217025168e-17	3.62061913393826e-17	2.12821775600452e-17	4.12250447082343e-17	1.9422658726703e-17	1.44611186394813e-17	2.87287255083408e-17	1.6833859216389e-17	2.82290987540956e-17	2.91924120744926e-17	1.1545660070624e-17
2008018	18	4.68283747989205e-17	4.25927205812121e-17	3.69604078442761e-17	4.16397911181647e-17	5.23353079626694e-17	3.5058055951367e-17	3.6248647126373e-17	5.06662878470989e-17	3.31110509242228e-17	3.92952449261573e-17	1.4800460892725e-17	4.15101647117989e-17	2.39578173688873e-17	1.42700675341271e-17	2.65478537224649e-17	1.73367448532008e-17	3.78271658727612e-17	2.75355095943295e-17	3.23707930559759e-17
2008018	19	2.75846793492273e-17	4.32737832563167e-17	3.53957423966512e-17	4.0553125154172e-17	4.87049087189276e-17	3.86174269688693e-17	3.88229562432109e-17	4.98494310492163e-17	3.40197711040329e-17	3.25210405160877e-17	1.13006754700252e-17	4.20658243789511e-17	2.82204175269258e-17	1.41958156762417e-17	2.41695966410661e-17	1.75705830188444e-17	4.90676630981627e-17	2.90089947883435e-17	6.00848405914512e-17
2008018	20	1.65485582952548e-17	3.9865166766226e-17	3.41810245608442e-17	4.01377828805484e-17	4.49429358645721e-17	4.10711333565278e-17	3.02074794774681e-17	4.35914694033185e-17	3.7985536897838e-17	1.43249777143693e-17	1.25323116392368e-17	4.20163680435001e-17	2.50111988215031e-17	1.53561073699562e-17	2.21747423774607e-17	1.78469611068812e-17	5.41347686281984e-17	3.15165276549884e-17	7.29731111377693e-17
2008018	21	1.16562388193408e-17	3.07014250156891e-17	3.30834806354563e-17	4.08482544308573e-17	4.15688050771007e-17	4.22945580839261e-17	1.81871582313496e-17	2.82639152070652e-17	4.02507195503904e-17	4.03630653959937e-18	1.21089174486959e-17	4.14573312002655e-17	1.76562698833381e-17	1.75012579711183e-17	2.09002946646824e-17	1.85029229261125e-17	5.41958950918723e-17	3.47649295030977e-17	7.41710802363358e-17
2008018	22	1.14045233182152e-17	1.43182571076225e-17	3.17046366910759e-17	4.01550616674932e-17	3.63852122266991e-17	4.3000298282141e-17	6.29635842969106e-18	1.0917004417413e-17	3.69855072255746e-17	5.52924450067255e-18	1.02090093104069e-17	4.18020964958693e-17	1.34864244200281e-17	1.64722604885251e-17	2.01325135572297e-17	1.9575575431658e-17	5.32008094224485e-17	3.51985672276573e-17	7.29823971062241e-17
2008018	23	1.04761427097288e-17	2.3619598962061e-17	3.03167027092621e-17	3.50339713044096e-17	2.64239232755708e-17	3.95884520955964e-17	5.1066880428814e-18	5.76108000946228e-18	4.32830465349661e-17	1.28484468673058e-17	1.41938628265244e-17	4.15378900187855e-17	5.42766593455284e-18	1.30717089973215e-17	1.97300490845324e-17	2.13554495267812e-17	5.01234829614617e-17	3.27292188030598e-17	7.43384357664089e-17
2008019	0	5.24502294840299e-18	3.81540812299996e-17	2.9120305378258e-17	1.78673716319961e-17	1.04366323237654e-17	3.15081318932892e-17	1.05155401004026e-17	5.35850795942421e-18	1.32537066055747e-17	3.40999458750646e-17	1.86392204304983e-17	4.07396155933479e-17	6.98407968990475e-18	1.56670677365173e-17	1.96600141485895e-17	2.38385052376878e-17	4.54887737343804e-17	3.12125325931352e-17	7.85088561385367e-17
2008019	1	6.28224472294701e-18	4.98639506056716e-17	2.56484695452004e-17	2.1441270063121e-17	4.12302126188424e-18	2.94756488468962e-17	1.6500578161787e-17	5.31498234576629e-18	6.35146999811938e-18	1.05651636081453e-16	2.27910557465293e-17	3.87735697739989e-17	1.06450748010924e-16	1.69143566150132e-17	1.97598452951311e-17	2.62368718678601e-17	4.09865554984916e-17	7.56775389348164e-18	8.815201767829e-17
2008019	2	2.51796797606855e-17	5.93454992563464e-17	2.05608482464685e-17	3.5586128986096e-17	4.7520016213131e-18	3.77444462222572e-17	1.05803513346438e-16	4.45278296955617e-18	1.59085730982605e-17	1.06933859803173e-16	2.61889099586611e-17	3.25852612026103e-17	1.06527695468409e-16	1.44639174614179e-17	1.99932531527212e-17	2.58004072755257e-17	3.82703866726709e-17	2.61576629320554e-17	9.62561167383078e-17
2008019	3	4.66498321715707e-17	3.48859259400986e-17	2.42221923927816e-17	4.88481120084566e-17	5.0492545495599e-18	4.82627492317242e-17	1.0743306054512e-16	3.04913247209436e-18	4.50047617478324e-17	1.07642373233617e-16	2.94997739746863e-17	3.30129939534781e-17	1.070591090336e-16	1.42106961445766e-17	2.01245112785462e-17	1.6562959722452e-17	3.42071756865617e-17	1.08172937016602e-16	1.0069287629898e-16
2008019	4	1.08144132151255e-16	5.08221743386304e-17	3.44420697792338e-17	4.26482849513957e-17	2.96176640394761e-18	5.57752747517194e-17	1.07974612123775e-16	1.91592905984478e-18	1.09509212144041e-16	9.90606240226279e-17	3.38340304653056e-17	3.13283902827671e-17	2.24941983003831e-17	1.37827954967849e-17	1.99887282202978e-17	7.30244035907114e-18	1.43409917351654e-17	1.09269458099326e-16	1.01992499224065e-16
2008019	5	8.36936064343034e-17	5.75403845264702e-17	3.25409886651304e-17	3.23382349998767e-17	1.28737407361335e-18	5.62258113168198e-17	5.14314356062423e-17	9.2549273450132e-18	1.09193861708328e-16	2.28503507400288e-17	3.09906033221584e-17	2.74650370895881e-17	8.32872787249561e-18	1.52613960881387e-17	2.00707426243107e-17	7.39864227274131e-18	3.58891061414252e-18	1.01170977235969e-16	9.93165200785224e-17
2008019	6	4.18603055956405e-17	3.28458511682089e-17	3.10385844331156e-17	3.12278813895741e-17	2.89475517569921e-18	5.90766412498454e-17	2.51079304716226e-17	3.37530121121086e-17	6.79781899601198e-17	4.31310023882352e-17	3.1181250202247e-17	2.69906187509651e-17	2.56028809452074e-17	1.85657628123124e-17	2.04101057056857e-17	6.72476289612629e-18	5.36536826050899e-18	4.19512827010316e-17	9.21994533544296e-17
2008019	7	3.64673652549523e-17	1.43323617484678e-17	3.21783654883205e-17	2.067901511588e-17	1.40050420439182e-17	6.46713153660701e-17	6.20438952098308e-17	4.51887183292612e-17	3.03044731065383e-17	8.47512328912651e-17	2.49036727671354e-17	2.55617276245402e-17	2.67974787500328e-17	1.81170161095564e-17	2.23851426327124e-17	4.45328363925318e-18	5.86036258656879e-18	3.14256481847259e-17	8.50270294590881e-17
2008019	8	4.81187547838901e-17	7.21835910198608e-18	3.25866736729376e-17	1.77257642496865e-17	3.22884611201696e-17	5.54596358579638e-17	8.04145045714592e-17	3.69130462515298e-17	7.68084140062784e-17	7.75792760487389e-17	1.58776809043481e-17	2.43134302641754e-17	1.73583578453581e-17	1.58694194081385e-17	2.55351994224233e-17	6.35540981958957e-19	4.24381473615698e-18	5.57882237977797e-17	7.22621731247129e-17
2008019	9	5.34613284938204e-17	6.21527134568872e-18	3.18008022802457e-17	1.42174906537446e-17	4.0266353740737e-17	3.7251131483945e-17	6.93193923936801e-17	3.93981877004555e-17	8.22359768314614e-17	6.0061295325381e-17	7.89421547091073e-18	2.33170454992252e-17	3.25793575523494e-17	1.51311506964121e-17	2.52893625033755e-17	3.50148529836504e-18	7.21457564715881e-18	4.82090104103274e-17	4.51175389298849e-17
2008019	10	5.08369862718438e-17	1.04894891723384e-17	3.17075896514841e-17	2.52503713381028e-17	3.7416976700015e-17	2.40967993965867e-17	5.44424926237419e-17	4.79239367853059e-17	6.43556474275474e-17	5.15681708857375e-17	6.73134160295607e-18	2.37096434140338e-17	5.91785342977271e-17	2.00114990601332e-17	2.32089983272494e-17	1.48384140235284e-17	1.61227916642245e-17	3.50136267057208e-17	3.14133824327634e-17
2008019	11	4.84519320919261e-17	1.8545402526407e-17	2.944178296523e-17	3.55742761187076e-17	4.37460481893881e-17	1.89184532030943e-17	5.06167152070992e-17	4.92204471822625e-17	5.09475218265062e-17	5.45599008055471e-17	1.259376451187e-17	2.56340466868874e-17	7.2108899130667e-17	2.91925383602143e-17	1.33736943627415e-17	2.36559814167546e-17	3.13442678057447e-17	4.02089437321986e-17	1.83881679850877e-17
2008019	12	5.06895399688867e-17	2.55590658713009e-17	2.85671757145175e-17	3.75898755116414e-17	4.68812835632699e-17	1.59184634308554e-17	5.13618193873607e-17	4.56765307641009e-17	5.25330868598417e-17	5.78047406997389e-17	2.78607921139989e-17	2.95426973660607e-17	7.28571052570816e-17	3.84441143861073e-17	1.3686992626474e-17	1.99293609170927e-17	3.87987366092833e-17	5.65375583322904e-17	7.63064076582002e-18
2008019	13	5.66380183816334e-17	3.10265000081618e-17	2.91533805079462e-17	3.56640067164443e-17	4.47479388976509e-17	1.22718776946487e-17	5.41935172626341e-17	4.42438477604282e-17	5.75311301147405e-17	6.17100058470622e-17	4.35171188943928e-17	3.13610431108553e-17	5.80101073860067e-17	4.74533005416497e-17	2.01820067400458e-17	1.84467744485804e-17	4.74827790080983e-17	6.82441043070199e-17	5.49076415555897e-18
2008019	14	6.21292783011005e-17	3.21239350570226e-17	3.07546057562674e-17	3.38975580964351e-17	4.24561627761373e-17	8.28497838373005e-18	5.70213428828996e-17	4.76300335286772e-17	6.15730219586928e-17	6.42258180031737e-17	2.95774384044649e-17	3.0352116479536e-17	5.07482450563941e-17	5.22104212424018e-17	1.7064062212322e-17	1.99771618938593e-17	4.90669468784778e-17	7.14266547672688e-17	1.0032761655889e-17
2008019	15	6.51415474025579e-17	3.2144628060305e-17	3.32018256309033e-17	3.37570819386979e-17	4.45179418833573e-17	3.51821381848951e-18	5.98604868737825e-17	5.25704500046278e-17	6.02220622721819e-17	6.73306946208567e-17	2.0252648298798e-17	3.20005814646915e-17	5.25411684771267e-17	4.97918179003487e-17	1.71317874602793e-17	1.49048239714566e-17	4.54560506269701e-17	6.57962652314843e-17	1.41397780172819e-17
2008019	16	6.65696606810851e-17	3.23892119638513e-17	3.55620259931237e-17	3.38863916462994e-17	4.79915347295769e-17	2.8589111999567e-18	1.07152561002464e-16	5.65488787477247e-17	1.08061999583124e-16	1.07877205941066e-16	1.47933914629345e-17	3.59832125047506e-17	5.77546795402264e-17	4.55593195368779e-17	1.94089851615956e-17	9.68790420192933e-18	4.43127745319004e-17	6.45546319184496e-17	1.72662553451199e-17
2008019	17	6.49584741538853e-17	3.29169274347434e-17	3.69706869212857e-17	3.37815653883718e-17	5.17471868378659e-17	7.44363788675977e-18	8.33515236736775e-17	5.92317670592987e-17	1.08147455987208e-16	6.3477451590268e-17	8.70534385818202e-18	3.12008357744199e-17	6.12434199793472e-17	4.23900136705479e-17	2.24222234455923e-17	9.22484770555751e-18	4.53897720425306e-17	6.62354365824913e-17	1.84064128160919e-17
2008019	18	5.99586444247524e-17	3.4020201227012e-17	3.72652047066153e-17	3.42732130636705e-17	5.46877116547442e-17	1.38318381867723e-17	6.19978176859576e-17	6.07176648086628e-17	8.26612043979312e-17	5.29285757422714e-17	7.99187895356298e-18	2.45027649219924e-17	5.44977909103864e-17	4.1842400280107e-17	2.47203606919967e-17	8.93951310754778e-18	4.65601126489939e-17	6.1860074373013e-17	1.84660184224575e-17
2008019	19	5.46668039508563e-17	3.55096213039584e-17	3.65171900988142e-17	3.74238051251883e-17	5.78991910443025e-17	1.96148360273889e-17	5.18286329120553e-17	6.08384928157219e-17	6.65847497056398e-17	4.95529181877002e-17	9.93284349269564e-18	2.21632584571756e-17	3.76860049684159e-17	4.03012587498116e-17	2.0530374475336e-17	7.68631144668552e-18	4.72534171249773e-17	1.08358030520658e-19	1.81304498902601e-17
2008019	20	5.10339763182897e-17	3.67426335749352e-17	3.3673027310326e-17	4.08168282725832e-17	6.01814110197871e-17	2.32299945117788e-17	4.77842370431686e-17	5.86067714588863e-17	6.01569654021532e-17	4.62069810961051e-17	1.52383540473897e-17	1.95902242622953e-17	2.93668579317108e-17	3.82447627734704e-17	1.15150722620655e-17	5.09587271832539e-18	5.19684233085022e-17	1.08076092842398e-19	1.78536162072613e-17
2008019	21	4.82699603198077e-17	3.68387802168993e-17	3.08226725011512e-17	4.20754711798668e-17	5.96946458048262e-17	2.5449348310676e-17	4.44594919642257e-17	5.43809101015918e-17	5.37979338114758e-17	4.05576322926804e-17	1.7616243115002e-17	1.4561033100009e-17	2.88117502875746e-17	4.14988644671711e-17	1.26414823295696e-17	3.08904052116314e-18	1.07822435213059e-16	9.53639018532824e-17	1.68528877372814e-17
2008019	22	4.57771320481594e-17	3.59888613597478e-17	2.77909283779191e-17	4.14830639750249e-17	5.64872016077841e-17	2.70713203975502e-17	3.81334712764093e-17	5.03673317961872e-17	4.58572362177848e-17	3.69605462608611e-17	2.05883454100116e-17	1.18003981589482e-17	4.10306090159899e-17	4.66802870034203e-17	2.20261510814972e-17	2.00985085652749e-18	1.07820135881081e-16	3.97835207509895e-17	1.46808001981022e-17
2008019	23	4.34675630046671e-17	3.46520968266156e-17	2.51480098505745e-17	4.03712874596036e-17	5.21406220487317e-17	2.81762788375812e-17	3.31863602936925e-17	4.70702938135227e-17	3.60868290993667e-17	3.37244567303299e-17	2.41844618158311e-17	6.7445546791536e-18	4.77476388924296e-17	4.6572703668165e-17	2.80125332590825e-17	1.92040315224151e-18	7.55886966496967e-17	3.35615918280249e-17	1.12120913905505e-17
2008020	0	4.11603399184155e-17	3.388656822795e-17	2.33666669949685e-17	3.92136169157484e-17	4.82492100094109e-17	2.89882899860749e-17	2.97843214795465e-17	4.43466254151625e-17	3.02067909157514e-17	3.07403708697954e-17	2.763846547047e-17	7.44580085523631e-18	4.73930936678852e-17	4.38746712169764e-17	3.03127179281043e-17	2.94832987119817e-18	6.73615169163696e-17	3.26283929477017e-17	3.3645308412842e-18
2008020	1	3.93500416704627e-17	3.31307954608887e-17	2.2877780955293e-17	3.83859955753858e-17	4.49776682963323e-17	2.90380864224882e-17	2.74670681219717e-17	4.18254216115573e-17	2.85557665637267e-17	2.91378530778373e-17	3.06741408130446e-17	8.09139805831036e-18	4.34653829755659e-17	4.17537317014787e-17	3.20269295145742e-17	4.52592677755278e-18	5.92956362480976e-17	3.5968276802398e-17	1.06824562176446e-18
2008020	2	3.8166353905222e-17	3.24818202443179e-17	2.32614181501759e-17	3.78994597997124e-17	4.22096441307053e-17	2.86695415248655e-17	2.5782749720382e-17	3.96768394644666e-17	2.93523891368375e-17	2.78078026341749e-17	3.32378463008865e-17	9.13235389723101e-18	3.76298534401262e-17	3.97810894692074e-17	3.36086340951081e-17	6.05869681336611e-18	5.031805253039e-17	8.20907170207597e-17	2.1995117314999e-17
2008020	3	3.761046455929e-17	3.23860544491362e-17	2.4143733940963e-17	3.81433347977228e-17	4.00252777194055e-17	2.81071056315608e-17	2.47226431842259e-17	3.82026973564533e-17	2.99288472763672e-17	3.09711665375778e-17	3.52569742838485e-17	1.30342725251166e-17	3.12865488601671e-17	3.91901855408481e-17	3.48980970900315e-17	7.06428856303514e-18	4.34510465712015e-17	1.07496999340319e-16	6.08377106180127e-17
2008020	4	3.76914416717483e-17	3.25657540604366e-17	2.52704895191357e-17	3.79059205957819e-17	3.85738771965719e-17	2.73484436847982e-17	2.50905680573448e-17	3.74540592135822e-17	2.90618330769174e-17	4.12578222626853e-17	3.65891286684841e-17	1.83112641273772e-17	2.55294679901704e-17	3.9067380754122e-17	3.5844225295457e-17	7.79704769920287e-18	3.90067574725997e-17	5.46821467788731e-17	7.82386922943297e-17
2008020	5	3.82755487232178e-17	3.22702275943438e-17	2.60266475602008e-17	3.7401195940504e-17	3.79562979984291e-17	2.53192488959806e-17	2.65134619710815e-17	3.72195295835658e-17	2.75703890061844e-17	3.69853322823655e-17	3.75870750693084e-17	2.16743549671757e-17	2.0970495954932e-17	3.92209472627352e-17	3.65389860154742e-17	8.56189701659039e-18	3.59082756826315e-17	3.25683314342149e-17	6.39607165192979e-17
2008020	6	3.91416339342959e-17	3.08964656523944e-17	2.63691687556469e-17	3.64400662593213e-17	3.79472676056264e-17	1.32338899587761e-17	2.76049219059519e-17	3.74593207559398e-17	2.61744594969633e-17	3.19658209676785e-17	3.76026950437852e-17	2.3041532818626e-17	1.80678898030251e-17	3.98562970216248e-17	3.6975793081683e-17	9.16436619475068e-18	3.3392247741515e-17	2.6748125894806e-17	7.98225140141827e-17
2008020	7	4.03604100530393e-17	1.99218961167199e-17	2.70696213378517e-17	3.48901142242484e-17	3.82373580894032e-17	9.64789603912409e-18	2.56631345084911e-17	3.7924820240024e-17	2.58825814758463e-17	2.77110922065732e-17	3.7267046557397e-17	2.31149288502381e-17	1.84458035239935e-17	4.01408832822877e-17	3.71932029772375e-17	9.34108268612246e-18	3.19553796533676e-17	2.34991748972955e-17	9.28038948332289e-17
2008020	8	4.10631564493456e-17	9.22360199928415e-18	3.03526941542024e-17	3.37386341436766e-17	3.85475870662097e-17	9.42721105894336e-18	2.4695480979507e-17	3.80920005495182e-17	2.81465841957373e-17	2.70217072161894e-17	3.6993299290327e-17	2.24442319974654e-17	2.17343378446918e-17	3.99877198407093e-17	3.75917524545014e-17	2.86238026631237e-18	3.09829404506079e-17	2.31993001686518e-17	8.981244482827e-17
2008020	9	4.0873845179347e-17	4.55978107293595e-18	3.32563918592113e-17	3.38719538659786e-17	3.90082784561389e-17	2.512506283936e-18	2.61667464802187e-17	3.82928373714033e-17	3.1110771552253e-17	2.74102811620856e-17	3.80357011511286e-17	2.19702205880132e-17	2.86152687237383e-17	3.84757182887929e-17	3.77176171697571e-17	6.76234996815725e-19	3.0140716108735e-17	2.64555032546929e-17	1.06909642344571e-16
2008020	10	3.99473468580633e-17	1.7468334124873e-18	3.45732859949394e-17	3.62210621823379e-17	3.93220611413785e-17	2.24527429207198e-18	2.72245047823204e-17	3.88883268044061e-17	3.26558232490735e-17	2.78370047890711e-17	3.98149210458933e-17	2.24864612650042e-17	3.94923230550741e-17	3.48930650603462e-17	3.75255047812558e-17	6.48782723901195e-19	2.92048528030065e-17	3.22262401292859e-17	1.06169771146733e-16
2008020	11	3.83887970533395e-17	7.81614811320498e-19	3.48026695594757e-17	3.73368902870439e-17	3.95258913776653e-17	6.93869708010001e-18	2.82602085854938e-17	3.96367377113609e-17	3.20227447190175e-17	2.81146237476704e-17	4.1059688443447e-17	2.31415228537468e-17	5.05390903841169e-17	3.02222634502025e-17	3.72289649424703e-17	1.34955802543545e-18	2.83062006961541e-17	3.96557412812653e-17	6.88958526833521e-17
2008020	12	3.64576570456957e-17	8.98742569548131e-19	3.63958441570045e-17	3.79892109951265e-17	4.03062272988046e-17	1.73197603373573e-17	2.88316109744114e-17	4.03128751847557e-17	3.00388333650169e-17	2.80352829997754e-17	4.17645604327414e-17	2.39825551334487e-17	5.52982693206374e-17	3.35440881732957e-17	3.6800085818498e-17	7.52654486281098e-18	2.79328006936478e-17	4.5505937061526e-17	5.93906798070696e-17
2008020	13	3.41990764843572e-17	1.67792595052308e-18	3.72833167454411e-17	3.43884148691961e-17	4.08713417818417e-17	2.71602503794621e-17	2.86990558233555e-17	4.26986607705767e-17	2.85390452132947e-17	2.77804774016906e-17	4.05131084247081e-17	2.493577166763e-17	5.10784719729369e-17	3.709550391301e-17	3.6379667561803e-17	1.64208905591037e-17	2.84190429143115e-17	4.59549592775779e-17	5.70621134259729e-17
2008020	14	3.03813585711474e-17	2.94904049628363e-18	3.81531474066099e-17	2.89147369459859e-17	4.41659818720088e-17	2.93593449390318e-17	2.80039606371882e-17	4.27728670789456e-17	2.8066025962107e-17	2.69487858651334e-17	3.50662666408405e-17	2.49214863523218e-17	4.33851851614161e-17	3.7605787144755e-17	3.5705863058611e-17	1.09122504630709e-17	2.95042479203238e-17	4.41377189056064e-17	5.28940236684182e-17
2008020	15	2.347479589179e-17	9.16752890025975e-18	3.76378718804977e-17	2.38033149932513e-17	4.40284755711236e-17	3.00573057677948e-17	2.70847109926155e-17	4.01263638773549e-17	2.81943738399422e-17	2.58016054467726e-17	2.99054267291618e-17	2.56229557241178e-17	3.66514184062966e-17	3.73213308930317e-17	3.48903937158264e-17	5.17857294645369e-18	3.09858573836323e-17	4.28925056232008e-17	5.13658810111245e-17
2008020	16	1.80221085487624e-17	2.09077862157108e-17	3.68137284126123e-17	1.98638894378317e-17	4.23089897480183e-17	1.04994513655533e-16	2.58540746168217e-17	3.72190521450009e-17	2.8022082056349e-17	2.42773595092382e-17	2.75019094032161e-17	2.8407011827158e-17	3.66592511145928e-17	3.7344153245432e-17	3.40637852877273e-17	1.14577850311668e-17	3.28663968866097e-17	4.21705828112834e-17	4.96399429556724e-17
2008020	17	1.57047857512324e-17	2.53993495108159e-17	3.67905986413644e-17	1.71534878036329e-17	3.96223338734437e-17	1.06172426998504e-16	2.43935774647165e-17	3.46834162782706e-17	2.75388639776187e-17	2.29186763197829e-17	2.55071222689992e-17	3.18387266299639e-17	4.20559989548152e-17	3.73265519826985e-17	3.32210951028446e-17	2.04911574832847e-17	3.47054165751929e-17	3.38194818942762e-17	4.71045818036466e-17
2008020	18	1.47780884689779e-17	2.0573903119835e-17	3.79523931124639e-17	1.49153308064717e-17	3.66920930988273e-17	1.06102918927576e-16	2.2861095025958e-17	3.24047242545967e-17	2.66807505821129e-17	2.17859515738859e-17	2.49944123424189e-17	3.49924738216723e-17	4.07121216891927e-17	3.73231413489635e-17	3.23550463283344e-17	1.8284108312191e-17	3.63365260662764e-17	2.69651309467798e-17	5.42564059345452e-17
2008020	19	1.39410063844677e-17	1.62331131348079e-17	3.95440507150862e-17	1.26164813310872e-17	3.37543787064111e-17	7.18933935927473e-17	2.13286808532109e-17	2.9705170493648e-17	2.55161432047889e-17	2.05074248773929e-17	2.67231101124119e-17	3.55793443666415e-17	4.20254618784488e-17	3.7018971311025e-17	3.32453811997342e-17	1.8492977984312e-17	3.81113014693789e-17	2.41095475298136e-17	4.69005330661726e-17
2008020	20	1.30896697143094e-17	1.39514350538487e-17	3.99133329713053e-17	1.03743674704645e-17	3.10021293813191e-17	2.23462318723028e-17	1.98599191789842e-17	2.60568172119845e-17	2.41508268175436e-17	1.90337416252399e-17	3.16508749306491e-17	3.53186853082102e-17	4.13297565437585e-17	3.62157024683171e-17	3.47871532763224e-17	1.86545406549963e-17	4.0197919222831e-17	2.26799015052119e-17	4.71942354690828e-17
2008020	21	1.26382937343252e-17	1.28198963706352e-17	3.91164158901232e-17	8.26974152355696e-18	2.85188202022321e-17	1.27217430327282e-17	1.83527345035343e-17	2.1599970073815e-17	2.25249115818944e-17	1.74239551468994e-17	3.78245784608006e-17	3.55958145835851e-17	4.41297809658736e-17	3.5116598972254e-17	3.36564312643092e-17	1.1506853053094e-17	4.21875884397399e-17	2.15445200177614e-17	5.33950625250703e-17
2008020	22	1.26853502824114e-17	1.27091652603929e-17	3.68894570516051e-17	7.3756075436037e-18	2.6270548971053e-17	1.56627700694477e-17	1.68118469717408e-17	1.72414504281451e-17	2.07069258400808e-17	1.56425324948286e-17	4.17348343943959e-17	3.58271609237212e-17	5.48805904031323e-17	3.42990113355826e-17	3.08257194818094e-17	1.22664773114483e-17	4.34030945133556e-17	2.2139531728529e-17	2.78388227758806e-17
2008020	23	1.33717548760271e-17	1.20248759991705e-17	3.94471971292991e-17	7.44658169494228e-18	2.34348556397052e-17	2.7737385327399e-17	1.53323711788144e-17	1.42189771070779e-17	1.87149998296179e-17	1.44354174934385e-17	4.41289679186937e-17	3.56436994245345e-17	5.75872386342349e-17	3.40957975288292e-17	2.62944922556155e-17	1.27953397337463e-17	4.32329154594078e-17	3.04013793608731e-17	2.32020043985174e-17
2008021	0	1.40504905563204e-17	1.08571150855404e-17	4.41605229673377e-17	8.26941875975663e-18	2.0233114629002e-17	4.30839320593866e-17	1.42002730481539e-17	1.19227714762481e-17	1.75760826206843e-17	1.69450580887046e-17	4.39188900454289e-17	3.42867381240006e-17	5.67359600549945e-17	3.44674485111597e-17	2.18002750916608e-17	1.28063267130361e-17	4.17557053494659e-17	4.32734268556843e-17	5.40027783550028e-17
2008021	1	1.41498996544594e-17	5.77724341341881e-19	4.57889769675372e-17	6.93111766429555e-18	1.67308474355734e-17	5.0765246766521e-17	1.38163882957929e-17	1.03444567763598e-17	2.29695082455561e-17	5.43654474254409e-17	4.05539937926594e-17	3.26830674030026e-17	5.4388113451896e-17	3.5130651512244e-17	1.92675141234392e-17	1.36913132143353e-17	3.93032330525561e-17	4.26021301994825e-17	6.8445396579529e-17
2008021	2	1.38161805869274e-17	5.55474510815508e-20	4.63689825752301e-17	4.57997875092604e-18	1.31843316054417e-17	1.06729518907833e-16	1.93768849594939e-17	1.04752711835415e-17	3.51134273359877e-17	4.13669006639239e-17	3.72306717204823e-17	3.18644946758246e-17	6.09362092513415e-17	3.57478126482319e-17	1.87342968685347e-17	2.0113489146273e-17	3.61495560835781e-17	4.79839284737766e-17	1.06245243207159e-16
2008021	3	1.31339487940704e-17	1.52759598937078e-19	4.53197431687552e-17	5.09450600940652e-18	1.04772503994915e-17	4.57986704677865e-17	2.75497234936027e-17	1.13910722364751e-17	4.46318389727412e-17	5.36837621987842e-17	3.54650963615002e-17	3.00547632696375e-17	6.03203932115135e-17	3.62682729271172e-17	2.14413081605815e-17	1.11934170213724e-16	3.2988807109919e-17	1.07821916029997e-16	1.06264009146931e-16
2008021	4	1.25647636315984e-17	3.2776233532291e-19	4.25280055045007e-17	4.3366480291357e-18	9.44824576689081e-18	2.85275783738404e-17	3.44878664085452e-17	1.21818504456551e-17	5.5317968942944e-17	4.85458433591024e-17	3.73927840155064e-17	2.94173149668193e-17	6.63270434167439e-17	3.66911911432226e-17	2.71798292184144e-17	6.18429341448686e-17	2.97764498778768e-17	1.04767265252149e-16	8.5539480829583e-17
2008021	5	1.28918643170854e-17	2.72929197527654e-19	3.95294398994509e-17	3.59594045798579e-18	9.99651260835963e-18	2.04365958901378e-17	4.11218535437452e-17	1.25015542022092e-17	1.08188667091031e-16	5.83370039383879e-17	4.3476629832391e-17	3.05944325867735e-17	6.27614597970037e-17	3.65641700093707e-17	2.82260212733731e-17	5.04443537487193e-17	2.6234217105876e-17	7.58411939231865e-17	1.06854233589642e-16
2008021	6	1.46008370361368e-17	4.96403864525832e-19	3.94976715905788e-17	3.02328590515803e-18	1.07247541085117e-17	2.50292413092299e-17	1.0741779485728e-16	1.30085554348342e-17	1.07417564770636e-16	5.58211712097512e-17	4.8645382553586e-17	3.13470752314221e-17	6.19084522028223e-17	3.63041103531864e-17	2.56705131036053e-17	4.27856528098983e-17	2.19813186124813e-17	6.38164269186228e-17	1.07254570010719e-16
2008021	7	1.65697254608834e-17	1.88538002400318e-18	4.22996840510237e-17	2.75799240328062e-18	1.14897311210997e-17	1.05449657274593e-16	5.10561978320451e-17	1.47503898542888e-17	7.69959313495578e-17	4.81345162244513e-17	5.49829144899815e-17	3.12805529231737e-17	6.6584825448001e-17	3.7154767122678e-17	1.99652581421259e-17	4.28093448123722e-17	1.7698064491029e-17	6.85392579266042e-17	4.99221379867882e-17
2008021	8	1.83023705380554e-17	4.46352891415017e-18	4.4062422869387e-17	3.21989102220566e-18	1.2600035969979e-17	1.05100756574317e-16	4.78140996942905e-17	1.7147008825535e-17	5.80287886799121e-17	5.36208374951322e-17	6.05847223267828e-17	3.02673698352028e-17	6.79937220178386e-17	3.88098882563338e-17	1.24802349706802e-17	3.55870148383709e-17	1.46253068303073e-17	8.43365789960416e-17	3.35113501507463e-17
2008021	9	1.9707313632229e-17	4.81080248708943e-18	4.58297858630584e-17	1.40510667183266e-17	1.41828636242188e-17	8.93603077566361e-17	5.14668056720152e-17	1.96957456099706e-17	6.09325720112357e-17	6.17774873514173e-17	6.24372406537557e-17	2.8465960036038e-17	6.24634941023596e-17	4.0747955145441e-17	9.51352422975913e-18	2.92368501761174e-17	1.26580782971423e-17	9.17262553837722e-17	3.18397864482587e-17
2008021	10	2.15132049883086e-17	1.32904229763873e-18	4.68325314271335e-17	1.55894630725928e-17	1.57920459369336e-17	6.90949687623541e-17	5.93086449331272e-17	2.18602961599829e-17	6.62694793239815e-17	6.82188199483111e-17	6.27175896916663e-17	2.72627614990993e-17	5.77655365755014e-17	4.3114698609247e-17	9.52071283392908e-18	1.07433081321889e-16	1.19378882177066e-17	9.20989723416833e-17	3.28513542955306e-17
2008021	11	2.34291038652274e-17	5.11333500332884e-19	4.7916170612046e-17	1.29735968642331e-17	1.73155886199449e-17	1.05843024562167e-16	6.59207646025913e-17	2.22357992775831e-17	7.53181647555957e-17	7.20321036755741e-17	6.2042123613667e-17	2.67789573220676e-17	5.4316980566582e-17	4.75497343504275e-17	8.95716609435855e-18	6.68019624750967e-17	1.13701554766715e-17	1.07707086103809e-16	3.1181687844958e-17
2008021	12	2.50881059791775e-17	4.05189864895577e-19	4.64835248371743e-17	8.04324652397345e-18	1.75965278014457e-17	6.83990742722348e-17	6.98064833813893e-17	2.16557727345271e-17	8.10477497079805e-17	7.41631007621523e-17	6.15877127412013e-17	2.76343655329253e-17	5.40028696588164e-17	5.1206594270391e-17	8.10931964537889e-18	6.55404998760394e-17	1.13045467455862e-17	1.07374669329838e-16	3.62564210634484e-17
2008021	13	2.62974157960291e-17	4.41527035177054e-19	4.36899726212309e-17	6.34876057182633e-18	1.93041355101923e-17	5.0958782015425e-17	7.21986460376377e-17	2.12247635167648e-17	8.35088005062557e-17	7.42168456652452e-17	6.17027042412677e-17	2.99685737605723e-17	5.28937151619646e-17	5.36175057454481e-17	7.87624007323711e-18	1.0823288236169e-16	9.54202732841323e-17	1.05294289485029e-16	3.59384153891789e-17
2008021	14	2.76303518154333e-17	4.76868540559199e-19	3.92066359598643e-17	4.79358273603639e-18	2.04025639567265e-17	3.32685436921178e-17	7.32061913099904e-17	2.05325826957876e-17	8.42334214529236e-17	7.28840876069907e-17	6.15921924710937e-17	3.78415808086567e-17	5.06234360442212e-17	5.31795698072878e-17	6.93595677557686e-18	6.56845924498818e-17	1.08128413134208e-16	8.83225054967241e-17	3.30465242413728e-17
2008021	15	3.05683123828287e-17	9.53663327344047e-19	3.1335490741768e-17	3.78104134290971e-18	1.97779153014976e-17	1.76536882333643e-17	7.29152689961309e-17	2.02019879158296e-17	8.52760335045728e-17	7.27522010261959e-17	5.98687225512748e-17	1.18125199462318e-16	5.02579613477358e-17	5.31237580901068e-17	5.11814320558881e-18	5.61769784581567e-17	1.08342171852453e-16	7.48714406887126e-17	3.09135526845374e-17
2008021	16	3.02939284865376e-17	1.68857061201927e-18	2.5239164950349e-17	2.58860396479272e-18	1.79310680176093e-17	1.68430646739545e-17	7.278941238871e-17	2.1699309626469e-17	8.1636584062817e-17	7.32431692835565e-17	5.68623893450393e-17	1.15088908934906e-16	5.26262463941437e-17	5.1639579349201e-17	2.68680260982367e-18	4.36586005387948e-17	6.33648153431457e-17	6.46831451021916e-17	2.94306744602876e-17
2008021	17	2.62173274574789e-17	6.89079722929924e-18	2.31509862854886e-17	2.1023973683601e-18	1.72382815682164e-17	1.58058716335932e-17	7.3048197283731e-17	2.53001017310969e-17	7.75240911337061e-17	8.46207368244574e-17	5.47272150590299e-17	5.85985605945124e-17	5.49808771025017e-17	4.99729410029138e-17	1.50982998793828e-18	3.11175790488322e-17	5.5698029010039e-17	5.85178938492169e-17	1.74435092710659e-17
2008021	18	2.44379308255892e-17	2.0302503243995e-17	2.32540246095685e-17	1.16388571929162e-18	1.74920956909282e-17	1.27076427409475e-17	7.17138751856786e-17	2.35566124921031e-17	7.35780763092389e-17	8.59217032443367e-17	5.28745344805469e-17	5.48978307190955e-17	5.48456687497345e-17	4.92350613180097e-17	9.58552611472641e-19	2.04410020770764e-17	5.10450444706354e-17	5.5385652971188e-17	1.48110089003165e-17
2008021	19	3.07068872490522e-17	2.00703015797914e-17	2.36828371281907e-17	5.84674438887917e-19	1.61369443567303e-17	1.91189112416115e-17	7.08622445523151e-17	2.20099293520428e-17	6.85059329228436e-17	8.36349124371078e-17	5.11634028267683e-17	5.2038089246781e-17	5.52214135967327e-17	4.90044988435843e-17	7.484416157367e-19	1.82996590788264e-17	4.78083260708471e-17	5.4358056315677e-17	1.5498441145024e-17
2008021	20	3.60730950098139e-17	1.24785284322454e-17	2.380428128368e-17	4.12659232955544e-19	1.50245721643887e-17	1.9978387971288e-17	6.97158775864306e-17	2.55744087659809e-17	6.31508719074667e-17	7.61374280898622e-17	4.9438243176121e-17	5.06227350174102e-17	5.60385961116494e-17	4.95837122738156e-17	6.39253689515989e-19	2.00545885887232e-17	4.57232608176807e-17	5.55885769522136e-17	1.54158876727506e-17
2008021	21	4.14796760215181e-17	4.53976605044382e-18	2.21355073017893e-17	5.41894837605949e-19	1.7217657064148e-17	1.99599914039385e-17	6.89982145145358e-17	3.12511608084625e-17	5.96694424424878e-17	6.83683292599076e-17	4.76294883857278e-17	5.02406278430072e-17	5.73062051749057e-17	5.05404536880957e-17	5.76039703389317e-19	2.29067498713554e-17	6.22002337148348e-17	5.70773947921108e-17	2.6916137399397e-17
2008021	22	4.98190038599393e-17	2.59738464865179e-18	2.05405686444385e-17	1.18789564548925e-18	2.30489673174101e-17	1.64416428312258e-17	6.88902396427438e-17	3.51513321228047e-17	5.92574414691942e-17	6.22145713302576e-17	4.49692923596867e-17	5.0354105340855e-17	5.89191594843459e-17	5.24091011459365e-17	6.39647294796033e-19	1.88551662600615e-17	6.34809553550667e-17	5.76279615099548e-17	1.06471886381332e-16
2008021	23	5.84240525731451e-17	2.60772698648678e-18	2.0916358208111e-17	2.75336910684604e-18	3.10496768094485e-17	7.78280382690498e-18	7.00977930666957e-17	4.12123772949441e-17	6.00904869464724e-17	5.77792431223575e-17	4.13417977304941e-17	5.03382426390444e-17	6.03575145766586e-17	5.27315051655107e-17	5.25783417047772e-19	1.02693624561251e-17	4.09820420032452e-17	5.69939878903093e-17	3.98288313519837e-17
2008022	0	8.52771386016635e-17	2.8229563088389e-18	1.90696350177088e-17	6.60230450728541e-18	4.07194917859981e-17	3.07565254555579e-18	6.57098928848933e-17	4.8646125560923e-17	6.00176590297969e-17	5.71015708614692e-17	3.69906000423053e-17	4.78183367810923e-17	6.15983966998249e-17	5.28095943232756e-17	3.42819082053071e-19	7.17516444581197e-18	4.44036875094564e-17	5.60034882163627e-17	1.89864022466514e-17
2008022	1	1.18183151722891e-16	3.45206142547779e-18	1.20581166000663e-17	1.25838008009714e-17	5.53041927007944e-17	2.76117926568488e-18	6.12269586024198e-17	5.57299363841278e-17	5.90973328922118e-17	5.99439109783261e-17	3.24360071195924e-17	4.55836959149814e-17	6.27726095127655e-17	5.31056704729084e-17	2.56885886600936e-19	5.34528487172036e-18	5.18327709231585e-17	5.44652962401462e-17	1.73046350098899e-17
2008022	2	1.19082489906592e-16	8.44286220796388e-18	1.0736115498728e-16	2.03773260703331e-17	6.53388359755933e-17	4.23849639341871e-18	5.883108083623e-17	6.11088073631302e-17	5.74638691139278e-17	6.35516860070373e-17	2.78221696082587e-17	4.39841953203042e-17	6.22550728841366e-17	5.34835100934781e-17	2.20334565272197e-19	3.97303997304911e-18	5.62541984528508e-17	5.16649429760705e-17	2.02746009609652e-17
2008022	3	1.00912792006567e-16	1.91437438018629e-17	1.06992506153058e-16	2.86413526732462e-17	6.65352536792798e-17	6.0387460350251e-18	5.6894095046614e-17	6.23801463914017e-17	5.47909049605155e-17	6.04414699399141e-17	2.36781767865916e-17	4.31128689211645e-17	6.20927786745568e-17	5.35617965281378e-17	4.75810670233011e-19	3.02621706662116e-18	5.77717204863975e-17	5.01637136281662e-17	2.76337879099186e-17
2008022	4	1.07312207888211e-16	3.15440718529304e-17	5.7105928181226e-17	3.54543441947243e-17	6.36526967551762e-17	4.72315999528429e-18	5.53061530762309e-17	6.07484273616782e-17	5.16738661319082e-17	5.84064826111454e-17	2.2280253627194e-17	4.2686594977132e-17	6.3442022892963e-17	5.37290288309418e-17	1.94632423443063e-18	3.21850591972638e-18	5.82044750964664e-17	4.95879236448468e-17	3.63559104861052e-17
2008022	5	1.19593467604151e-16	3.90757252291939e-17	3.52187783376767e-17	3.85121123599747e-17	5.93993747731062e-17	2.76971053683262e-18	5.38367559458355e-17	5.87616125197258e-17	4.90891959299378e-17	5.63903654370027e-17	2.49134434521067e-17	4.23256330433161e-17	6.18075952310864e-17	5.36496332682987e-17	3.18860832259068e-18	5.21348330551471e-18	5.81493715526992e-17	5.06027465574099e-17	4.29581795887501e-17
2008022	6	1.211603584542e-16	4.50229418716257e-17	5.49317921258338e-17	3.93924167812824e-17	5.81819342282387e-17	7.13718529509222e-18	5.2533286958146e-17	5.84776600940222e-17	4.81060234275706e-17	5.42298760233976e-17	2.59077559159683e-17	4.21143424922106e-17	6.28610916093748e-17	5.42204887835307e-17	2.75838847090672e-18	4.40453838372686e-18	5.84351353957721e-17	5.24838855120021e-17	4.55011624163395e-17
2008022	7	8.11306587370587e-17	4.8225732826421e-17	1.07062571233239e-16	4.69559154608891e-17	5.90163012964918e-17	2.29439289924105e-17	5.17345554583412e-17	5.89886265108156e-17	4.90755330362344e-17	5.25297730813924e-17	2.66633782026423e-17	4.1696502669243e-17	6.48474398630076e-17	5.58832318190752e-17	1.06231120053064e-18	2.97716155542221e-18	5.57414663936591e-17	5.47947388355008e-17	4.43171151341614e-17
2008022	8	7.1886242377553e-17	5.12411806255407e-17	6.24631253550805e-17	5.18251917252548e-17	5.4532538301475e-17	3.41309523606944e-17	5.16277900283647e-17	5.62307269031089e-17	5.10362235583957e-17	5.10774428937722e-17	2.55889994235823e-17	4.13444467928429e-17	6.65576300025443e-17	5.41055805648834e-17	7.6931215193755e-19	2.12709534061632e-18	5.18283326911164e-17	5.70404092530929e-17	4.25785160173542e-17
2008022	9	6.56303031505723e-17	5.74976116976248e-17	3.56062920625803e-17	5.23936754405515e-17	4.84987528721226e-17	4.46479946651543e-17	5.2425416365905e-17	5.24443372331323e-17	5.37265633803679e-17	5.05527831679901e-17	3.83140152674497e-17	4.108305529602e-17	6.87330352140245e-17	5.26056204025129e-17	4.46026014551498e-18	3.73958931480093e-18	4.59305344214762e-17	5.94145613271521e-17	4.41539909514185e-17
2008022	10	6.22363269254269e-17	6.25534686245268e-17	1.52551276628268e-17	5.0347890392689e-17	4.34004529150031e-17	5.16069999498317e-17	5.2605586272879e-17	4.94898419054895e-17	5.64925535091495e-17	5.05821695095115e-17	1.14649880906686e-17	4.07957891758221e-17	7.08446177781517e-17	5.00088032800396e-17	1.14357136804136e-17	1.92055893363306e-17	3.88981893885419e-17	6.26960715338554e-17	5.03229198113459e-17
2008022	11	6.08417890116057e-17	6.50195333764049e-17	1.3447534158386e-17	4.69895668236592e-17	4.06367687357593e-17	5.33806611218849e-17	5.20480037885693e-17	4.71881086591846e-17	5.92386689806764e-17	5.19532265405442e-17	7.04368721305924e-18	4.07050821173097e-17	7.03275314274165e-17	4.82726666929279e-17	1.90811515451317e-17	3.58801176618408e-17	3.14289196736383e-17	6.66470590394295e-17	5.65270201777123e-17
2008022	12	6.06031423894131e-17	6.70795670353927e-17	1.47202176319618e-17	4.32010471237132e-17	3.99949407591614e-17	5.30961757927592e-17	5.22425614271131e-17	4.579138180261e-17	6.31779906458996e-17	5.5719536481774e-17	6.78277455930973e-18	4.16083614159937e-17	7.11588910767778e-17	4.70805087892857e-17	2.6778343385875e-17	4.56818450256679e-17	2.46897120073374e-17	6.8922279319744e-17	5.95803806452703e-17
2008022	13	6.15843287088585e-17	7.82781549505697e-17	1.61906361910758e-17	3.99457859477155e-17	4.05495325666984e-17	5.25530208291701e-17	5.61017671805445e-17	4.54477271650766e-17	6.45688082953935e-17	5.94721664486761e-17	7.15617467720664e-18	4.19833147396716e-17	6.84372266021901e-17	4.59081136809187e-17	3.20542278155745e-17	4.8158676997163e-17	1.95190776059889e-17	6.89051015308635e-17	5.9800539991739e-17
2008022	14	6.37222652934584e-17	1.23327761265638e-16	1.75434803085034e-17	3.75470081520459e-17	4.14306147228814e-17	5.19887150115847e-17	5.62502289167455e-17	4.63133399155097e-17	6.44873770454807e-17	6.45026962226608e-17	7.86889401335422e-18	4.16954389552679e-17	6.38787277122026e-17	4.43865568520024e-17	3.68605773002337e-17	4.74166242193455e-17	1.58980809584305e-17	6.7701462957412e-17	5.81664357259143e-17
2008022	15	6.78986719709576e-17	7.52089699473179e-17	1.84347765156967e-17	3.66058600255265e-17	4.20229030487792e-17	5.06239507855513e-17	5.66421554079285e-17	4.80188710544397e-17	6.42639910705918e-17	6.17170520106776e-17	8.76174494349925e-18	4.16885092315214e-17	6.04604258482503e-17	4.27958547674741e-17	4.07484502845169e-17	4.55983004585939e-17	1.3632443382787e-17	6.54387448321293e-17	5.61452248178229e-17
2008022	16	7.46415291585354e-17	7.79256665439131e-17	1.84517005069017e-17	3.65694579204872e-17	4.29660576496689e-17	4.95486177116969e-17	5.6810894812076e-17	5.12899932432329e-17	6.40941684161901e-17	5.60696638949257e-17	9.87745094602478e-18	4.15796547639062e-17	5.75688780852225e-17	4.11832664637282e-17	4.2229436544888e-17	4.33765188662514e-17	1.25474290447328e-17	6.27452676900149e-17	5.29937375680847e-17
2008022	17	7.47890612057613e-17	7.81665828533334e-17	1.87328387352442e-17	3.71708216277982e-17	4.41450485537347e-17	4.9436933503613e-17	5.5470381998036e-17	5.54691114543091e-17	6.3267105791317e-17	5.15149945864802e-17	1.12261461238664e-17	4.11348977327838e-17	5.59833991274262e-17	3.99755568204732e-17	4.05386018575693e-17	4.00253940675163e-17	1.24889494227387e-17	5.88670470940051e-17	5.02912421722268e-17
2008022	18	7.07645562280305e-17	7.55079133591404e-17	1.9040877950749e-17	3.83135702807441e-17	4.62985618181019e-17	5.11053802205399e-17	5.25692746549728e-17	5.9055586127093e-17	6.15534714715546e-17	6.80138540617064e-17	1.26447526142211e-17	4.05392565643376e-17	5.6125108169301e-17	3.92212255123574e-17	3.70608468117625e-17	3.65443492038363e-17	1.3279654498713e-17	5.51873808471535e-17	4.56670111041223e-17
2008022	19	6.36295731932522e-17	7.40527597131034e-17	1.90599957739521e-17	3.92223251497535e-17	4.96501782007556e-17	5.49164780539555e-17	5.1191669247382e-17	6.51964768136169e-17	6.01403436640495e-17	7.69500424982954e-17	1.3862561802199e-17	3.9765573677169e-17	5.70774016319578e-17	3.86845294314358e-17	3.30720450818574e-17	3.41869410859228e-17	1.45895361626686e-17	5.17552287295041e-17	4.339081876568e-17
2008022	20	5.76269642456786e-17	7.40607699647553e-17	1.89757443645827e-17	4.0327384618527e-17	5.35021168638879e-17	6.01489841063229e-17	5.22557986796687e-17	6.66566796347881e-17	5.8477972091237e-17	6.64761891168999e-17	1.50202909295492e-17	3.95056026638938e-17	5.54730224692485e-17	3.82888864500379e-17	2.97657968993505e-17	3.28637457244349e-17	1.60679825286525e-17	4.87529424576495e-17	4.09575711239999e-17
2008022	21	5.26989120334213e-17	7.48733888279798e-17	1.87134063278294e-17	4.19445662096316e-17	5.69002118204121e-17	6.39231742583968e-17	5.35744670087953e-17	6.59869746734123e-17	5.7025211580529e-17	5.53793831117519e-17	1.617282451217e-17	3.98606830406292e-17	5.89382642162856e-17	3.81269279302252e-17	2.75373029748213e-17	3.27919536947992e-17	1.73840684673297e-17	4.60351984483269e-17	3.79850619677673e-17
2008022	22	4.85365448552049e-17	7.54889369439694e-17	1.83475298376345e-17	4.32741184847579e-17	5.7993301533418e-17	6.89561562711851e-17	5.38624349932257e-17	6.4194288894223e-17	5.53570379894236e-17	4.9301140699551e-17	1.74333512364533e-17	3.99281290325148e-17	5.8794783609806e-17	3.784986316658e-17	2.57229673142984e-17	3.33222334332872e-17	1.80415078731965e-17	4.36646398096003e-17	3.45066196087304e-17
2008022	23	4.57193400281086e-17	7.53130432512313e-17	1.80830208308606e-17	4.42207371698846e-17	5.83927506017529e-17	7.32119279672207e-17	5.31563863070435e-17	6.21855766810616e-17	5.36186911394668e-17	4.5729373031086e-17	1.87794746037132e-17	3.95974205314739e-17	5.82367901528437e-17	3.75606132021232e-17	2.36873670080329e-17	3.39280644896092e-17	1.8132016464427e-17	4.1618544010106e-17	3.05825433266866e-17
2008023	0	4.42815969456032e-17	7.35671990120054e-17	1.77980061804965e-17	4.82369405828505e-17	5.84120824064627e-17	7.42856996218159e-17	5.18065340001491e-17	5.9369478443565e-17	5.2006433848945e-17	4.30140055060977e-17	1.99036283254027e-17	3.9225984344918e-17	5.6996019322711e-17	3.77475686879434e-17	2.04005881389877e-17	3.49157805058586e-17	1.83145847989884e-17	3.9922220644747e-17	2.62824065797636e-17
2008023	1	4.39595211633527e-17	7.01005993244512e-17	1.75148560206571e-17	5.25041029727496e-17	5.84442925221223e-17	7.05884713646582e-17	5.03327618469696e-17	5.59500829943757e-17	5.0721020381265e-17	4.08766006358392e-17	2.03145174222677e-17	3.81633050375057e-17	5.56347208373879e-17	3.8008716129634e-17	1.68034956462122e-17	3.61220344533776e-17	1.8658582938894e-17	3.84878019712928e-17	2.3388180915454e-17
2008023	2	4.4430086050031e-17	6.62532362193559e-17	1.71749111838367e-17	5.60296742744658e-17	5.77848072771412e-17	6.3897341159147e-17	4.90765961091692e-17	5.14104520921412e-17	4.99862560409578e-17	3.93602736416435e-17	2.01631831919599e-17	3.689235470824e-17	5.72056580736779e-17	3.76621061542264e-17	1.46436334925875e-17	3.5750928110111e-17	1.84486571558647e-17	3.75327458361646e-17	2.21807795682569e-17
2008023	3	4.53203109195666e-17	6.35832519760133e-17	1.68558567061964e-17	5.89973376933825e-17	5.60738709320711e-17	5.81757942885234e-17	4.81519802407687e-17	4.75941644121886e-17	4.98127247309167e-17	3.90809728335104e-17	1.96329453592391e-17	3.56475527026966e-17	5.40934661558494e-17	3.6908855187759e-17	1.40371235495497e-17	3.68218219297471e-17	1.79892292149095e-17	3.72469027957006e-17	2.20613554675509e-17
2008023	4	4.81737242250152e-17	5.9478362133903e-17	1.66339125190231e-17	5.8916708028208e-17	5.36734792625619e-17	5.46600816167879e-17	4.66094931046342e-17	4.52712373869726e-17	5.02422754875926e-17	4.00337479187305e-17	1.85135958869853e-17	3.45862471015194e-17	5.13636030307925e-17	3.61265240891683e-17	1.36620975020159e-17	3.80081240888803e-17	1.78375628319624e-17	3.79804571983903e-17	2.25844498464599e-17
2008023	5	5.14577277982239e-17	5.56172411588704e-17	1.64175405330283e-17	5.92564350213286e-17	5.11481314256958e-17	5.3166241014806e-17	4.39209570338606e-17	4.41754310562398e-17	5.13821254393399e-17	4.2240107266584e-17	1.72512251786396e-17	3.30761374787314e-17	4.88126698019491e-17	3.54163682017389e-17	1.30353456632891e-17	3.90039956926511e-17	1.80383016946111e-17	3.97811946996379e-17	2.41674945320556e-17
2008023	6	4.71455244268417e-17	5.1643168660271e-17	1.61768386717825e-17	5.90102122526902e-17	4.87790830443611e-17	5.1815867242825e-17	4.1971220128957e-17	4.32733486401774e-17	5.3257353019696e-17	4.0480180474585e-17	1.58651408113226e-17	3.08665322433783e-17	4.51896675045357e-17	3.46464425354981e-17	1.30341672904607e-17	4.09094520488061e-17	1.83468547840167e-17	4.25878900156959e-17	2.60314543981063e-17
2008023	7	4.19510356741164e-17	4.70484360383546e-17	1.68010303138609e-17	5.80036484463569e-17	4.63872442344672e-17	5.46838778332677e-17	4.11992009242277e-17	4.30764301575854e-17	5.24464923720354e-17	3.23499528744346e-17	1.44799458061488e-17	2.87092745867804e-17	3.96985051446611e-17	3.26348884995245e-17	1.34510193095046e-17	5.00651458483826e-17	1.8527829875237e-17	4.58328577237031e-17	2.78446005143943e-17
2008023	8	3.56092244891855e-17	4.28499032787644e-17	1.73311119078573e-17	5.69385228093006e-17	4.44711185200182e-17	5.28716642454346e-17	3.91284349603324e-17	4.42550981482338e-17	4.97016367678952e-17	2.1489951246476e-17	1.34299090976299e-17	2.6590620569818e-17	3.15156585834236e-17	2.95483740956357e-17	1.40648177144808e-17	6.1302037365462e-17	1.89176077947204e-17	4.7390026044483e-17	2.92909386303165e-17
2008023	9	2.5764564459226e-17	3.92277700646402e-17	1.97453674582919e-17	5.74654470687992e-17	4.3631924554551e-17	4.99409018143744e-17	3.63289923185e-17	4.69478750100954e-17	4.54099541014889e-17	1.05153716683669e-17	1.37198908353662e-17	2.43963218964653e-17	2.23456042042378e-17	2.68138415308206e-17	1.47110060517433e-17	6.21417410767661e-17	1.97920099892038e-17	4.7498695655949e-17	2.90062999714511e-17
2008023	10	1.99842725164164e-17	3.66415370264617e-17	2.20848527260149e-17	5.42731367520359e-17	4.39038316656278e-17	4.74640612799721e-17	3.35254208142051e-17	4.89774870959804e-17	4.17859135964427e-17	5.80044786117684e-18	1.29475993511933e-17	2.23683110636926e-17	1.66060959176958e-17	2.53198752891135e-17	1.54914696482922e-17	6.32246095357651e-17	2.10191687631176e-17	4.46186772305501e-17	2.40054617487002e-17
2008023	11	1.54923007704597e-17	3.48330087530998e-17	2.54332365479923e-17	5.00683104465317e-17	4.46396802678328e-17	4.47461397022878e-17	2.90780865960025e-17	4.30831317237557e-17	4.0571860907316e-17	7.25205370237952e-18	1.22746027401923e-17	2.06454082152488e-17	1.7979136956017e-17	2.69283828582803e-17	1.62969617882416e-17	6.31191141657637e-17	2.30422493036521e-17	4.08069289797161e-17	2.18447007587343e-17
2008023	12	1.17550788059865e-17	3.20638242121421e-17	2.79525526622836e-17	4.55115129618745e-17	4.54548555963359e-17	4.35487899101549e-17	2.12109212827944e-17	3.10191383557379e-17	3.40934944179714e-17	8.86424101474214e-18	1.19203597159795e-17	1.88306551804564e-17	2.50114203581003e-17	2.94444205478099e-17	1.70851151302134e-17	6.19039526965551e-17	2.68273204111272e-17	3.64657331160945e-17	2.56911983005225e-17
2008023	13	1.21372026368349e-17	2.76141595696854e-17	2.9358399999023e-17	4.24994929872718e-17	4.64952487543768e-17	4.0592714565268e-17	1.4318900718843e-17	1.95930799216308e-17	2.07189814065992e-17	1.0250095762396e-17	1.16813819889256e-17	1.73613988196649e-17	2.85549278615933e-17	3.06953742894323e-17	1.81099620958067e-17	6.21359915834636e-17	3.29815723676649e-17	2.62956322231638e-17	3.03277527860491e-17
2008023	14	1.43140966071094e-17	2.37920261873376e-17	2.93977144870183e-17	4.0127241722084e-17	4.35776385854564e-17	3.75919020064196e-17	1.07966976705735e-17	1.13112761144576e-17	1.03536755120237e-17	1.14428537804239e-17	1.1497138375476e-17	1.57204916283056e-17	3.02136060596781e-17	3.0906252721233e-17	1.93341667891323e-17	5.96754107336727e-17	3.97737992986167e-17	1.48988946329821e-17	3.63398695280858e-17
2008023	15	1.51428109513949e-17	2.12985402069769e-17	2.85927584137954e-17	3.8084155506297e-17	3.4431396691145e-17	3.46653831294972e-17	9.19239009301014e-18	7.32982798674884e-18	7.13988856807432e-18	1.23148057381369e-17	1.1597905205652e-17	1.41190967233899e-17	3.0586884449367e-17	3.04674893323901e-17	2.03125370442205e-17	5.49862652399948e-17	4.41907374613221e-17	1.08070864104233e-17	4.17116450046995e-17
2008023	16	1.53975940510739e-17	1.93079706538731e-17	2.77749235427592e-17	3.5410705973614e-17	1.39783761494593e-17	3.13425909706151e-17	8.45307983097305e-18	6.42591457187887e-18	6.66425273515222e-18	1.279889601687e-17	1.17938896660934e-17	1.27982365211432e-17	3.02289651827566e-17	2.98751730257572e-17	2.15660750888434e-17	5.10010303000558e-17	4.54808679333578e-17	1.10200222508616e-17	4.53136386940563e-17
2008023	17	1.89445673370088e-17	1.61386019088641e-17	2.67152026532372e-17	3.18669697646611e-17	6.06193948155391e-18	2.95130732871981e-17	8.14438863737779e-18	7.33156522434664e-18	6.78383437574041e-18	1.28551697239367e-17	1.20253858203737e-17	1.17863359186335e-17	2.98250956294593e-17	2.93382065139372e-17	2.3209843188294e-17	4.77284659507661e-17	4.51197723304498e-17	1.19500326135168e-17	4.7341830486004e-17
2008023	18	2.56827919205152e-17	1.05761396297462e-17	2.59593412032116e-17	2.86304350016907e-17	3.61153249498031e-18	2.84635888455538e-17	7.97724137748587e-18	7.38792619194509e-18	7.27015144717758e-18	1.27428555987962e-17	1.22939458817908e-17	1.10820685414031e-17	2.94140934913804e-17	2.88621130820458e-17	2.57983391719284e-17	4.3623153076519e-17	4.45927256141881e-17	1.27375196865135e-17	4.81408160703812e-17
2008023	19	3.09891093379009e-17	7.94742489843932e-18	2.54328835810281e-17	2.55587251390253e-17	4.10363030839368e-18	2.73261591417031e-17	7.83777503050534e-18	7.88423046811603e-18	8.23847850525384e-18	1.27702519511116e-17	1.27546770141096e-17	1.08360668504823e-17	3.13581599457205e-17	2.84194697799325e-17	2.9553202943002e-17	4.11801934120364e-17	4.44488303780163e-17	1.32638708640627e-17	4.81700329502051e-17
2008023	20	3.37570670715795e-17	1.44406354970889e-17	2.58204027427072e-17	2.22468342574109e-17	8.69265684457963e-18	2.51702770891187e-17	7.71440095474018e-18	1.38111145175911e-17	8.95013076067671e-18	1.3222766477089e-17	1.37515704026407e-17	1.09610920372911e-17	3.37456894318478e-17	2.7987896754438e-17	3.39939371955151e-17	3.87059264194169e-17	4.40423442810761e-17	1.42120472713601e-17	4.76884890818521e-17
2008023	21	3.53651689569863e-17	2.34908522955524e-17	2.5568711315911e-17	1.53092498416794e-17	9.18743210526608e-18	1.43533682694022e-17	7.7238797093617e-18	2.28908149239748e-17	9.57907302208092e-18	1.23003961276264e-17	1.42582432264678e-17	1.12575521855863e-17	3.49221408766232e-17	2.7580674130423e-17	3.70331882373966e-17	3.62177107467485e-17	4.61268433886361e-17	1.4898545972884e-17	4.66944146954582e-17
2008023	22	3.69055290360536e-17	2.89769331521374e-17	2.54642238912687e-17	8.10063412726378e-18	1.06655385178267e-17	6.16700813119819e-18	8.05773640487611e-18	3.01797705038016e-17	9.64906149630466e-18	1.34180440914989e-17	1.43245765191703e-17	1.23384026255544e-17	1.44823048056098e-17	2.71735930042322e-17	3.98936130330889e-17	3.44907346546295e-17	4.57016096985518e-17	1.51502657836165e-17	4.55517531246572e-17
2008023	23	3.83464944727221e-17	3.31128656757414e-17	2.59989337339809e-17	6.76303044406625e-18	1.40347036139716e-17	9.43820490837287e-18	1.00662842143786e-17	3.18016968284591e-17	1.03366302903681e-17	2.06842515327777e-17	1.43424100303074e-17	1.31595282052213e-17	3.23895838961164e-18	2.64168061155642e-17	4.23659539772347e-17	3.30546669306789e-17	4.0970179676954e-17	1.49967555227442e-17	4.44883586926986e-17
2008024	0	3.98926389505282e-17	3.62000905806862e-17	2.69058356002205e-17	1.09367506070032e-17	2.0692720844432e-17	1.82762039594029e-17	1.59702019461349e-17	3.08524307991101e-17	1.02660518334928e-17	2.8223807586266e-17	1.47701472760651e-17	1.41172770916109e-17	9.31236297308766e-19	2.52643580974813e-17	4.41100633928226e-17	3.13974982060003e-17	3.30708540235305e-17	1.00534137570242e-17	4.253665612965e-17
2008024	1	4.09331450351209e-17	3.8239576493913e-17	2.81295289209767e-17	1.79117108672697e-17	2.61306358453434e-17	2.6936472482313e-17	2.31390724523994e-17	3.30683403920375e-17	1.1002930456035e-17	3.5370030370775e-17	1.54263136165209e-17	1.53184659105247e-17	1.85905069217407e-18	2.4111775695012e-17	4.54139118453583e-17	2.59486305235519e-17	2.05456454154553e-17	3.65858893318646e-18	3.84018913451818e-17
2008024	2	4.21830868679897e-17	3.94528909910133e-17	2.8901150684404e-17	2.49298205059284e-17	2.57519268540681e-17	3.29884778800551e-17	3.08080374688657e-17	3.56143519690242e-17	1.81247076349624e-17	4.27643710414787e-17	1.84693597722442e-17	1.77408751499716e-17	4.90131587489881e-18	2.23282912505058e-17	4.64355001272866e-17	1.60409862310289e-17	1.33991372623788e-17	4.11385364402386e-18	3.38892109613228e-17
2008024	3	4.54221927209361e-17	4.09669902651624e-17	3.04168044570339e-17	3.02756237687063e-17	2.88408579035455e-17	3.63983002186942e-17	3.87926306412102e-17	3.75273648884495e-17	2.56360311939276e-17	4.96953606530264e-17	2.35805267559703e-17	2.0249006780219e-17	8.08151685616549e-18	2.01532055633368e-17	4.69247465026623e-17	9.5729761904516e-18	1.08210980267058e-17	1.27060617122945e-17	3.41862291584308e-17
2008024	4	4.9928575669867e-17	4.13060459652686e-17	3.09708919921657e-17	3.38907808582069e-17	3.29841858608294e-17	3.90065057966592e-17	4.52416867056734e-17	3.89168327055297e-17	3.22072520143277e-17	5.3967492111765e-17	2.80478395453635e-17	2.22306718808215e-17	9.27375501162073e-18	1.85819640428603e-17	4.71140770236816e-17	6.37368233689578e-18	9.14065240119352e-18	2.3132433449139e-17	4.09677382591154e-17
2008024	5	5.36939572630707e-17	3.96813404969575e-17	3.11661984261895e-17	3.63583660027134e-17	3.57870291855108e-17	4.11391314652326e-17	4.85385755286962e-17	4.17171112205347e-17	3.81652697499599e-17	4.95055274027806e-17	3.03397649074965e-17	2.3885276247015e-17	8.20009517292139e-18	1.82819184055131e-17	4.7342434529842e-17	9.22469217975332e-18	8.7962099350391e-18	3.29626047528856e-17	4.77954614843067e-17
2008024	6	5.32426450860469e-17	3.73931670866518e-17	3.10897646793159e-17	3.79518985922015e-17	3.7253410317089e-17	4.22798676712109e-17	4.56912037184951e-17	4.5753526689515e-17	4.09319505963199e-17	3.50470318164548e-17	3.00947103605224e-17	2.56942734039893e-17	8.55025513957429e-18	1.98403439563282e-17	4.74283988786121e-17	1.49337113361965e-17	1.33167171540779e-17	3.8359543487952e-17	5.26440899865128e-17
2008024	7	4.17195835438787e-17	3.47584198897656e-17	3.02555994106921e-17	3.80711497265871e-17	3.86716822015783e-17	4.26055866170977e-17	3.41478223679075e-17	4.89618641488827e-17	4.26657490158472e-17	4.00001784160443e-17	2.91126049331626e-17	2.88510786752453e-17	1.30652282714351e-17	2.29958990058763e-17	4.68114988742782e-17	1.98299184634121e-17	2.24227293302972e-17	4.03007621861917e-17	5.25114758858959e-17
2008024	8	3.64982711648929e-17	3.5228201255362e-17	2.88908893885165e-17	3.73243162593826e-17	4.04087106334001e-17	4.17722247517712e-17	3.85358993999144e-17	4.90704286547073e-17	4.37105722107342e-17	7.1765825720891e-17	3.09399882526188e-17	3.04015389825121e-17	2.92465586075959e-17	2.69532950916294e-17	4.40396767166248e-17	2.35693122980704e-17	3.15869884673083e-17	4.15102403691094e-17	2.50313967531347e-17
2008024	9	7.1085339140224e-17	3.8346060476455e-17	2.72988298033306e-17	3.65853721771984e-17	4.2015584475794e-17	4.04762495453953e-17	6.41546191566697e-17	4.14838764618036e-17	3.97935625256586e-17	1.07851403269904e-16	3.01234571495657e-17	2.99395231968433e-17	1.0527708524792e-16	2.8540245885355e-17	3.96075390030836e-17	2.56803350564086e-17	3.60257821511556e-17	5.46253074699201e-17	2.28403077976512e-17
2008024	10	9.07320736391966e-17	4.31540927291487e-17	3.02239431946143e-17	3.65306713334344e-17	4.1829632731681e-17	3.83597086179294e-17	1.07510985609783e-16	3.33453181249092e-17	1.09849648271538e-16	1.07904559462086e-16	2.39010782402644e-17	2.86020606989472e-17	1.06397873610652e-16	2.83618800594189e-17	3.33884410830432e-17	2.75230922053802e-17	3.19353935446831e-17	1.09417224052082e-16	3.43615869947246e-17
2008024	11	9.08274436558466e-17	4.35604721351117e-17	3.11071903412584e-17	3.69326957294577e-17	3.89668579596572e-17	3.72779481527208e-17	1.07503527996374e-16	4.37365495708177e-17	1.08440112962056e-16	9.17676663515775e-17	1.2946074016571e-17	2.78018380636951e-17	1.06511682012338e-16	2.99580939847336e-17	2.55867866723508e-17	2.86874009527162e-17	3.47289469102118e-17	8.45400904037619e-17	4.67593735250569e-17
2008024	12	8.77070356611736e-17	3.2690595438993e-17	3.14914465289168e-17	3.76869872839473e-17	3.4729113350847e-17	3.69047540246486e-17	1.08148701246913e-16	7.46454767111877e-17	1.06828550169183e-16	9.07005234493719e-17	5.13702100278967e-18	2.74255583268869e-17	1.06687528492775e-16	3.75767247312428e-17	1.71207576570239e-17	2.80926331696689e-17	3.79619355172505e-17	1.07251782759892e-16	5.62308341991966e-17
2008024	13	8.97947355250554e-17	1.76239457810539e-17	3.31013437522153e-17	3.74622744922288e-17	4.54111780302472e-17	3.71150763175905e-17	9.57009717284695e-17	8.52933755831259e-17	1.0650453704033e-16	9.21965127512774e-17	1.77933668250168e-17	2.70536259716798e-17	1.07048367064495e-16	4.73337153606347e-17	1.41092861722821e-17	2.81580795369932e-17	3.99814258166081e-17	1.07121945965511e-16	6.15954928589976e-17
2008024	14	9.03255654084279e-17	2.38453750824854e-17	3.33533806324857e-17	2.87534715428534e-17	7.40743872964123e-17	3.7924449115709e-17	1.09197516306777e-16	8.5168885414214e-17	1.11056174780007e-16	1.09532207686971e-16	2.29579634820961e-17	2.65389848416594e-17	1.06819833447748e-16	4.99407007648363e-17	1.45486230330858e-17	2.85543132880436e-17	4.0252341890291e-17	1.09388013641086e-16	7.31721229898774e-17
2008024	15	9.09668600149948e-17	4.17597827614182e-17	3.30236333322336e-17	3.00422142518058e-17	8.24743646014476e-17	3.74062831897703e-17	1.07682447793998e-16	8.48659259044815e-17	1.08201057952598e-16	1.08035059183846e-16	2.51892062179093e-17	2.60450602930313e-17	1.06290638195707e-16	4.7734852533783e-17	1.5009252239718e-17	2.9096739776813e-17	3.93593547061852e-17	1.082489297975e-16	1.059410616419e-16
2008024	16	9.40051454144455e-17	5.51388054644073e-17	3.18674477791012e-17	4.38017350626381e-17	9.5425214706643e-17	2.99087750802436e-17	1.07625169812747e-16	1.00289046374591e-16	1.07763388761554e-16	1.08094697910384e-16	2.61721150896123e-17	2.49557049685047e-17	7.66796754185176e-17	4.40574544380455e-17	1.68568948741981e-17	2.99387042291337e-17	4.3938760578409e-17	1.09789208023887e-16	1.06014352889551e-16
2008024	17	9.5462337258963e-17	6.51904394771916e-17	3.06319980195469e-17	5.78983950967987e-17	1.07708517414481e-16	1.62278852369065e-17	1.07716961032046e-16	1.09139960566641e-16	1.07841412188009e-16	1.09214726643494e-16	2.84369115108104e-17	2.29804352236463e-17	6.98835307497791e-17	4.28441646302924e-17	1.91771025083926e-17	3.11573316955383e-17	6.47113926339057e-17	1.09408944486496e-16	1.06176924799931e-16
2008024	18	9.4652490742399e-17	1.05607019266812e-16	2.89430003357673e-17	6.51440433883212e-17	1.07640609937535e-16	1.62345277693247e-17	1.07714309082111e-16	1.07557378919014e-16	1.08001506807546e-16	9.98690574390998e-17	2.8529517997213e-17	2.08819787799828e-17	6.5802056341725e-17	4.22453016035447e-17	2.140501477998e-17	3.10583889419243e-17	7.77739680374633e-17	1.07957244168171e-16	1.06748114063942e-16
2008024	19	1.08328421263335e-16	1.06054939833667e-16	2.10461960568011e-17	6.82054274694446e-17	1.07662811904755e-16	2.95840041169438e-17	1.07671146408749e-16	1.07565580588318e-16	1.07936391432076e-16	1.08041723359829e-16	2.56040558261354e-17	1.84266200531811e-17	1.06700536937276e-16	4.09383019174075e-17	2.32293678928028e-17	2.55554680975716e-17	1.07776231512296e-16	1.00580946581704e-16	1.07373025276685e-16
2008024	20	1.09189680291049e-16	1.06057816529986e-16	6.28111130562387e-18	1.05664721084595e-16	1.07605512798481e-16	4.104102321272e-17	1.07680523965972e-16	1.07729858543376e-16	1.07963607027362e-16	9.46851754512607e-17	2.76998102746053e-17	1.43497930419183e-17	7.73505053331707e-17	3.94822434441472e-17	2.46955112681212e-17	1.33091607143501e-17	1.07684403826296e-16	1.0803104522401e-16	1.07447102791356e-16
2008024	21	9.5824988287229e-17	1.0588550039412e-16	2.83592030151261e-18	1.05649274285402e-16	1.07675719611017e-16	4.91297283550583e-17	1.0853330456268e-16	1.07931975548483e-16	1.07981409787388e-16	9.91840612137161e-17	3.67698369048557e-17	1.11502154863345e-17	7.01307886305451e-17	4.01394988204186e-17	2.55754576508991e-17	5.42413886222585e-18	1.07694329178214e-16	9.5996140313391e-17	8.81818081442177e-17
2008024	22	8.79958694689406e-17	1.05874476747621e-16	1.51323067875114e-18	1.05695967687923e-16	1.07761211635341e-16	5.51740215453171e-17	1.01154444903408e-16	1.07959148198665e-16	1.07980878122043e-16	8.97091736053086e-17	5.28938352730061e-17	9.75645163981767e-18	6.65426583397332e-17	4.545450275696e-17	2.50370674882026e-17	2.12302433697753e-18	1.07671888904637e-16	1.02186878869209e-16	8.10526685673967e-17
2008024	23	8.00475553286072e-17	8.29908477684746e-17	1.03469406562735e-18	1.05709234396664e-16	1.07887312966716e-16	5.65374510827265e-17	1.07325618886685e-16	1.07830315464954e-16	1.02598288838738e-16	7.5761154851933e-17	5.90189833075193e-17	1.05131564551433e-17	6.70572909318904e-17	4.63157192037287e-17	1.2216652207861e-17	3.72958687827935e-18	1.07702060252566e-16	9.87812172185084e-17	7.3587250375564e-17
2008025	0	7.19731298782227e-17	7.16020937462967e-17	1.61362719907029e-18	1.05563835153493e-16	1.07978137839163e-16	5.78610720320988e-17	1.07313636993572e-16	1.07671347397876e-16	1.07819124757837e-16	1.07680118641455e-16	5.85625793327725e-17	1.57178178050206e-17	6.81410896028844e-17	4.94602279802776e-17	4.68519563024669e-18	1.43493107212386e-17	1.07725411220741e-16	1.0364869549315e-16	6.7261571730397e-17
2008025	1	6.61548077430604e-17	6.71933102737302e-17	4.09098703409714e-18	1.09072596495369e-16	1.07724459165204e-16	5.92384570735084e-17	1.07026798705097e-16	9.027177762519e-17	1.07630168480957e-16	6.1927420010517e-17	5.55236506480049e-17	2.25077491798313e-17	7.25037587165382e-17	5.49756415253952e-17	5.58280289288092e-18	2.60433435569939e-17	1.07677168225641e-16	1.02865288624449e-16	6.38764996273391e-17
2008025	2	6.07783789391286e-17	6.26622327574361e-17	1.0684360241258e-17	7.65724290199896e-17	1.07599216445917e-16	5.69536792919456e-17	6.34231043376194e-17	7.33061199453229e-17	1.09092033655252e-16	5.40996778298374e-17	5.3103650426914e-17	2.90708346251533e-17	6.15947158425398e-17	5.8121705706038e-17	1.10660065855644e-17	3.63684686560399e-17	1.07637400772937e-16	1.07764291119127e-16	6.07361424932035e-17
2008025	3	5.43307552967574e-17	6.04210942256715e-17	1.89358674837216e-17	7.25635884144211e-17	8.23422206430826e-17	5.39901259020324e-17	5.2522172264061e-17	6.5555584806819e-17	9.38306556234258e-17	5.1652274359551e-17	5.06832252549872e-17	3.62130684575576e-17	4.91758381542422e-17	5.41674504351738e-17	1.87686213484219e-17	4.5279845892516e-17	1.07124012232217e-16	9.2713205483249e-17	5.7542859625193e-17
2008025	4	4.45807286894049e-17	5.90245282176951e-17	2.32126146462311e-17	6.92528208654804e-17	6.98817501855363e-17	4.87609620663718e-17	4.91723091889582e-17	6.05545079452124e-17	6.36641513403247e-17	4.13242668323616e-17	4.8693554962053e-17	3.97138312229468e-17	3.622250189923e-17	4.88426650188577e-17	2.7096335951437e-17	4.62973930188678e-17	9.88742662015166e-17	7.21053818092082e-17	5.45233061481234e-17
2008025	5	3.20456626035338e-17	5.89007477228728e-17	2.43300910510542e-17	6.43857056772441e-17	6.27814238417106e-17	4.67698854370617e-17	3.86227657506456e-17	5.55832565701226e-17	5.15383900010391e-17	2.60690216798798e-17	4.80146387795709e-17	4.25818544061687e-17	1.07389297963759e-17	4.50940043349874e-17	3.9442533391771e-17	4.63700063315302e-17	9.15112473043724e-17	5.24465413848846e-17	5.16999779529083e-17
2008025	6	1.96876273863082e-17	5.84694040790602e-17	2.32893380591689e-17	5.94838632645219e-17	5.80428206619904e-17	4.80375471121275e-17	2.46980811008575e-17	4.9373648233787e-17	4.28338297115387e-17	1.43949303100212e-17	4.88381779811109e-17	4.3948097345213e-17	2.87167340949448e-18	4.37202719119939e-17	5.01870977325242e-17	4.73249537444794e-17	8.11922381993248e-17	4.16226214370341e-17	4.91041275640524e-17
2008025	7	1.04003753515842e-17	5.79320190201547e-17	2.22817267090367e-17	5.56559966989652e-17	5.33223469656819e-17	5.31791274329185e-17	1.33518546563808e-17	4.00442047591469e-17	2.78910982185903e-17	7.05933631936368e-18	5.27839639861201e-17	4.66136806147614e-17	3.77805447042707e-18	3.60112020300859e-17	4.63876349932304e-17	4.90360406112009e-17	7.03766184336627e-17	2.28693473837508e-17	4.60178719935233e-17
2008025	8	5.14196555108532e-18	5.5695018924868e-17	2.16022072812435e-17	5.39336185337526e-17	4.70364177374522e-17	5.42845229012049e-17	6.62146777086149e-18	2.8294915853018e-17	1.41237551580962e-17	3.12249937236035e-18	1.11346001969219e-16	5.07058200264167e-17	5.98014539788096e-18	2.90482014349461e-17	4.56427601365996e-17	5.04613174245273e-17	6.21082883051955e-17	9.23675773104751e-18	3.97533630664779e-17
2008025	9	2.43231124470843e-18	5.15288360738903e-17	2.18789712758715e-17	5.23954615629491e-17	3.91183209618438e-17	5.55303072170185e-17	3.17692154711825e-18	1.75379445909482e-17	6.91362851900628e-18	1.4387092993549e-18	5.73072151422511e-17	5.23238122194638e-17	8.41922657125028e-18	3.33663092055053e-17	4.97376704377079e-17	5.09158818034457e-17	5.61527602695403e-17	4.32343106061976e-18	3.13013266423943e-17
2008025	10	1.18926864841361e-18	4.61105478934493e-17	2.55694527275049e-17	4.8900808901178e-17	2.93138578314442e-17	5.66636972886627e-17	1.50083370574526e-18	9.76178499349758e-18	3.52880337290548e-18	8.56554554596826e-19	5.38777728630539e-17	5.2633727329717e-17	7.11445268873061e-18	1.04957760426711e-16	5.35630590362437e-17	5.27732508477388e-17	5.04794085673795e-17	2.15326189880464e-18	2.62606544563588e-17
2008025	11	7.25150258394033e-19	3.96114460133331e-17	3.59082341222151e-17	4.26597600156947e-17	1.91261599997606e-17	5.64198160258576e-17	8.1824652242799e-19	4.78810997383774e-18	1.97234845758601e-18	4.6960813756811e-19	5.55201086952319e-17	5.31377822251542e-17	5.13887867572001e-18	4.97321721459243e-17	5.56213564692581e-17	5.51730542733673e-17	4.38558467467058e-17	1.4374845677309e-18	2.2022528349962e-17
2008025	12	4.07274963229373e-19	3.1747176420913e-17	4.56523660735632e-17	3.53444603177246e-17	1.08815206710657e-17	5.56961750643922e-17	4.0844723256135e-19	2.18471750029497e-18	1.25958730000325e-18	2.21504412754034e-19	5.64808775918255e-17	5.32639865141255e-17	1.11431345298186e-17	3.31758316015266e-17	5.47349926138483e-17	5.58559633540668e-17	3.53127765600139e-17	1.03911725697856e-18	1.76721331506779e-17
2008025	13	3.70324360439689e-19	2.51025081068002e-17	4.95290050241267e-17	2.69438579747428e-17	5.50077174917388e-18	5.15729349687867e-17	1.97676011738267e-19	1.10429428618869e-18	7.85336778872166e-19	1.0732648701632e-19	4.31467345320992e-17	5.3024120423657e-17	2.40611959506561e-17	3.25309746583902e-17	5.53875412836847e-17	5.34711208395719e-17	2.60336295908639e-17	8.83652922314947e-19	1.41157934217988e-17
2008025	14	2.78484361614478e-19	2.00453651621052e-17	4.85388771458175e-17	2.08155250143875e-17	2.97769741657423e-18	4.66926024080515e-17	9.77150775999967e-20	8.69164759572761e-19	4.99809106083302e-19	5.77420951565396e-20	1.91370886253877e-17	5.56111716145436e-17	3.12520219603531e-17	2.94589030214534e-17	5.6450773143612e-17	5.31373148358844e-17	1.74253999378467e-17	1.02858728818372e-18	1.15651853651525e-17
2008025	15	1.73926670606592e-19	1.569648988747e-17	4.60495290935513e-17	1.62215741581589e-17	2.13725847963822e-18	4.17769079688403e-17	5.29159148270164e-20	7.64919715924918e-19	2.73296580733363e-19	3.70670020274984e-20	1.38170758332555e-17	6.79196441485987e-17	3.40113645556416e-17	4.75637411612714e-17	5.37324359682016e-17	5.13279021379062e-17	1.16839865577407e-17	9.5527002088306e-19	9.89019905526414e-18
2008025	16	9.44856468060787e-20	1.2197880670531e-17	4.31060411968911e-17	1.31443728637939e-17	1.80458570794769e-18	3.84779169106303e-17	3.60636523226836e-20	5.16119565942219e-19	1.56148677730886e-19	4.33495565305518e-20	4.95485210891591e-17	6.8064656963331e-17	3.65490565224105e-17	5.37948059250874e-17	5.14368288096613e-17	5.00229392482429e-17	6.80832139555144e-18	7.05798485700076e-19	8.80518815766711e-18
2008025	17	4.83053443392995e-20	9.83951525328029e-18	4.04435865820289e-17	1.05005811181111e-17	1.3188337039181e-18	3.62673713117763e-17	6.78054019445683e-20	2.86361178379192e-19	1.30794934276621e-19	1.04765188592266e-19	1.07285621125834e-16	5.77802452305875e-17	3.94197025657031e-17	5.6555573681942e-17	5.02709266807531e-17	4.91254311528769e-17	3.43186206217489e-18	2.16906425703945e-18	8.54474515590852e-18
2008025	18	2.6293934550348e-20	8.6591686279815e-18	3.88003194518571e-17	7.91611748119778e-18	7.31392028088407e-19	3.42745795993172e-17	1.67295214263099e-19	1.63490623931222e-19	1.90847614485098e-19	1.98411453414062e-19	7.79323529039606e-17	5.22874878376138e-17	4.02530859833815e-17	5.87163315007208e-17	4.70601547768877e-17	4.81100048897202e-17	2.00271455541549e-18	7.4995537758547e-18	9.20907941372046e-18
2008025	19	1.67167572500861e-20	7.46293880581667e-18	3.7729051215322e-17	6.13044714708333e-18	3.99397365102992e-19	3.18554672545438e-17	3.30103890345341e-19	8.42327887132012e-20	3.97067379071094e-19	2.94577128307246e-19	5.64675062131747e-17	4.64919629978333e-17	3.90735673499237e-17	5.9891494441918e-17	4.26261114641055e-17	4.60029561076688e-17	1.43134909121297e-18	1.17334337378044e-17	9.42933606590145e-18
2008025	20	1.42235567635058e-20	5.83780602418616e-18	3.69912970090066e-17	4.80403105905388e-18	2.24417160464521e-19	2.89374283311347e-17	4.33340041142561e-19	4.68928006433725e-20	6.78348701878775e-19	3.11714000273249e-19	4.42362469836095e-17	3.77882881775065e-17	3.69870613982153e-17	5.71344130873789e-17	3.74272070385047e-17	4.35897967140131e-17	9.46276853302265e-19	1.16393758195013e-17	9.35645188206947e-18
2008025	21	1.48395951392803e-20	4.53167746540748e-18	3.64437597902175e-17	3.50937789139115e-18	1.29532007024321e-19	2.54113036171793e-17	4.35082243508924e-19	3.94863750737784e-20	8.55082291263666e-19	3.24137120241942e-19	4.35935799680802e-17	2.88274684636473e-17	3.3936793500189e-17	5.5020049523045e-17	3.22384872822343e-17	4.12985519276238e-17	4.89087367956189e-19	5.75695001438924e-18	9.74853582227846e-18
2008025	22	1.63805636672073e-20	3.59646733612473e-18	3.60780089025625e-17	2.44930212180556e-18	8.60272924159926e-20	2.09776302320215e-17	4.71374928037208e-19	3.75375832932643e-20	9.5070432024013e-19	4.16049665815243e-19	4.61057587063538e-17	2.60837836734918e-17	2.93562293914667e-17	5.64908262675134e-17	2.77577304197827e-17	3.85613988959857e-17	3.25879382673483e-19	1.07474990559457e-18	1.0252382768132e-17
2008025	23	2.10522156683023e-20	2.94497888184349e-18	3.60699053042419e-17	1.81531763698134e-18	6.70214876633425e-20	1.71169301686545e-17	6.42354686113119e-19	3.20398179061103e-20	1.09902876723691e-18	5.61007450090276e-19	4.4491182405616e-17	2.70412274149989e-17	2.31235044535707e-17	5.6606594328582e-17	2.41400971298434e-17	3.5786213038548e-17	3.8008679748546e-19	1.85139272156466e-18	1.03351676106455e-17
2008026	0	2.62002291794317e-20	2.51967542825377e-18	3.58848633334016e-17	1.41359641166555e-18	5.42803222923439e-20	1.42352153694239e-17	8.09065744850537e-19	3.01744411939017e-20	1.3114082284343e-18	4.98204166697946e-19	4.05085225414696e-17	2.94299701787827e-17	1.97604491070965e-17	5.56907623884984e-17	2.03469287718818e-17	3.22351915555534e-17	4.17886056223587e-19	1.73514700644897e-17	1.01528884951548e-17
2008026	1	3.14536262529592e-20	2.33432082916901e-18	3.55057901452139e-17	1.10109199093157e-18	4.30456904072308e-20	1.2324039940636e-17	6.02599090945608e-19	4.07806241944529e-20	1.47346479803621e-18	2.7394324288317e-19	3.9989053466734e-17	3.38867542980559e-17	1.78934697600282e-17	5.4624092760518e-17	1.67292868983708e-17	2.77990293977109e-17	3.72831306753454e-19	8.0603113421843e-18	9.90173452048218e-18
2008026	2	4.10411003971355e-20	2.2322091674994e-18	3.52671947643228e-17	9.46532050225374e-19	4.31549966397735e-20	1.13407109672551e-17	2.78468061966807e-19	5.22258770245835e-20	1.53553832905906e-18	1.15315017141358e-19	4.34436686807742e-17	3.77397723830725e-17	1.47503595381962e-17	5.12368981979299e-17	1.31938920323699e-17	2.31234197275916e-17	4.07094528773769e-19	1.20291177492946e-17	9.45929364026135e-18
2008026	3	6.12733668407946e-20	2.03071580721697e-18	3.53401380876493e-17	9.11400100416791e-19	5.20643827401003e-20	1.03228267756068e-17	1.14071836103822e-19	4.85402541320266e-20	1.19327227146718e-18	7.79873325239785e-20	4.75307811398746e-17	4.01918188952347e-17	1.19939281555255e-17	5.05350647391814e-17	1.02662861721521e-17	1.97990830256104e-17	2.49213442573743e-19	1.21626404483523e-17	8.73013539056008e-18
2008026	4	9.24181624692003e-20	1.85931460701906e-18	3.57425298115899e-17	8.99750993513033e-19	5.86605704965162e-20	9.0070715823667e-18	7.16656088239225e-20	5.48274993069248e-20	6.73714508105989e-19	5.69395507756695e-20	5.01933835774787e-17	4.12682677452412e-17	8.62245528614346e-18	4.97201464070121e-17	8.70068039090219e-18	1.75380352774525e-17	2.50279271053893e-19	8.46985725938421e-18	8.09802779655464e-18
2008026	5	1.46182040102104e-19	1.9116168847675e-18	3.63320272003808e-17	8.71987539200043e-19	7.34709569119796e-20	8.10423264826008e-18	5.19806441947308e-20	7.94577625770153e-20	3.18636783854104e-19	6.63256755138e-20	5.08410801000327e-17	4.14710137942453e-17	5.17382054509287e-18	4.86056594437465e-17	7.03039234813698e-18	1.61876624975522e-17	2.48930160676884e-19	3.152549551655e-18	7.85769444074518e-18
2008026	6	2.30753500252434e-19	2.012752177883e-18	3.66658603927607e-17	8.74750804198566e-19	1.06061999314708e-19	7.78262687919716e-18	7.05583071808216e-20	1.16919459624147e-19	1.82506883674493e-19	1.70054358790589e-19	5.09475163680923e-17	4.08094627085063e-17	6.90976127003724e-18	4.75888687816087e-17	5.68029138449606e-18	1.48098447352454e-17	2.1068981432306e-19	5.16492793352297e-19	8.1168901914305e-18
2008026	7	7.99805127976252e-19	2.00107320219983e-18	3.65254598661385e-17	9.3340488975848e-19	1.5060579146483e-19	7.52496253300734e-18	2.25534865916794e-19	1.85105674858587e-19	1.44304864478391e-19	7.91030888966073e-19	5.13851306283106e-17	4.03381226362283e-17	4.16251143089493e-17	4.67142972555321e-17	4.44687717584041e-18	1.33833946531185e-17	1.01405786979581e-19	5.89051011280915e-19	8.5449051677335e-18
2008026	8	4.05039558595722e-18	2.02151943951379e-18	3.59961066510776e-17	1.00291456586134e-18	2.07346100544614e-19	6.92047370527509e-18	2.42748101052976e-18	2.11137676776909e-19	3.43314586756271e-19	9.60045451792334e-18	5.33363637349081e-17	4.05467186836302e-17	5.68282121593552e-17	4.6363908952248e-17	3.99068910318353e-18	1.24627600320263e-17	3.50873802520179e-20	6.9839420369677e-18	8.68172168405091e-18
2008026	9	6.76611810698107e-18	2.13675466545469e-18	3.58418505412887e-17	1.06505649789551e-18	1.87167130216266e-19	6.10978391416797e-18	5.07159093361828e-17	1.27262394092696e-18	1.11917322540051e-17	1.07924251182266e-16	5.26356755289849e-17	4.10127522894861e-17	6.39298230692898e-17	4.70342087818075e-17	4.05695031972667e-18	1.16694838152243e-17	2.90629398279218e-20	2.97090729477678e-17	7.51696017430532e-18
2008026	10	2.92890595452883e-17	2.50859318649708e-18	3.72643290776639e-17	1.16059105822056e-18	1.01972285861427e-18	5.52035375087181e-18	1.07894161038618e-16	4.17320197495425e-18	7.77516607888197e-17	1.07841930054623e-16	5.17195694080454e-17	4.11897112829414e-17	6.41761108654843e-17	5.37541720348266e-17	3.62540091512815e-18	1.06698539581876e-17	3.49544113761393e-20	5.1139357211499e-17	9.1049191189725e-18
2008026	11	4.94930712098064e-17	3.40773699527138e-18	4.04132240186031e-17	1.65849126497526e-18	3.84602569034685e-18	5.3780018581706e-18	9.12557616269387e-17	7.34651879674682e-18	6.91961662160445e-17	9.37468712003883e-17	5.10612863424609e-17	4.06652484255419e-17	5.95878713178275e-17	5.10154986460337e-17	3.13008059575799e-18	9.2682776654694e-18	5.15455874918408e-20	8.64565977653381e-17	1.38675153075852e-17
2008026	12	7.19492726348039e-17	6.88706770535035e-18	4.52676925702339e-17	3.50628579193416e-18	8.73365360289738e-18	5.73440275407418e-18	9.98102089805223e-17	3.90416939850554e-17	9.10163976735441e-17	9.30294580159786e-17	5.04418856586337e-17	3.96952252185051e-17	6.32743574537671e-17	4.63375881381238e-17	3.17249778031508e-18	7.94642847335882e-18	7.1051914929386e-19	7.81038416495538e-17	2.0525579286889e-17
2008026	13	8.54440207234903e-17	1.61648190695087e-17	4.40243457015388e-17	8.4552361909546e-18	1.07975696807456e-16	6.67896054499028e-18	8.13486198246892e-17	7.48980751932225e-17	9.01071014944782e-17	1.07721068616486e-16	4.96331341611869e-17	3.86347185240336e-17	6.48184372140951e-17	4.44103173376605e-17	3.61782254004664e-18	7.33499798274758e-18	1.72157662996935e-17	7.13061978062183e-17	2.63697180104988e-17
2008026	14	9.39367378349055e-17	4.32007719734843e-17	4.33718593583883e-17	3.07649700665887e-17	8.92102304897618e-17	8.55600721433776e-18	1.07738768973991e-16	9.33069683737791e-17	9.36586529029762e-17	1.00608727483526e-16	4.88179678042013e-17	3.77422876865095e-17	6.56632923303988e-17	4.35604061143919e-17	3.42152757214649e-18	7.33900983362425e-18	1.07818871118613e-16	7.89681598588287e-17	2.92233530877393e-17
2008026	15	1.04014583788139e-16	5.36130777495026e-17	4.16232908056901e-17	7.84555774558571e-17	1.07715412496646e-16	1.38260701993228e-17	1.08578559595997e-16	1.08846587856976e-16	1.03264509512487e-16	1.07805476305453e-16	4.85826480295196e-17	3.71256717262403e-17	1.07242514590868e-16	4.54651905920922e-17	2.49196042977511e-18	7.90150209681934e-18	9.9361089091244e-17	9.44014804678753e-17	2.96874131699271e-17
2008026	16	5.31064729709245e-17	5.42605704340906e-17	3.93944106537103e-17	1.0714078908506e-16	1.07748036337119e-16	2.49406435679038e-17	8.00048565789028e-17	1.09038828673776e-16	1.07787046588271e-16	8.18037830375675e-17	4.94481268745514e-17	3.68178188281789e-17	1.07032485221001e-16	5.47214895169093e-17	2.40909845232855e-18	8.86471682829821e-18	1.07137074847965e-16	1.01857252454523e-16	2.82162162106144e-17
2008026	17	9.8175855921981e-17	1.07288750398434e-16	3.89802112259366e-17	8.79750012211695e-17	1.07759083990973e-16	3.54719949987788e-17	9.28039627862436e-17	1.07818510304472e-16	6.70696673694245e-17	9.03033934533069e-17	5.16885868190333e-17	3.685004291411e-17	8.04612448669562e-17	8.23342696724878e-17	2.59473484462725e-18	9.68387689338705e-18	1.07140912321915e-16	7.02541646438128e-17	2.54323897268408e-17
2008026	18	9.71419600938803e-17	5.68072052877757e-17	3.63800913420514e-17	9.61781854189362e-17	1.07875806629001e-16	4.15548650060798e-17	1.07893322819731e-16	1.07841746674293e-16	1.07894661804115e-16	1.07871956105759e-16	5.59140043466223e-17	3.71567308714332e-17	1.06516162292351e-16	6.3827163041849e-17	6.78047611577007e-18	1.23288246426476e-17	1.07493473818915e-16	9.49780411713649e-17	2.21092879583435e-17
2008026	19	7.51520375269268e-17	5.92433252769237e-17	3.45640650366454e-17	7.91673258118874e-17	8.96365493905856e-17	4.30035545192861e-17	1.07626606679277e-16	1.07825547690974e-16	1.03683469987071e-16	9.56188872019122e-17	5.5321194724973e-17	3.77407343156788e-17	7.62633478813977e-17	5.88775142774848e-17	1.07313597453823e-16	1.84069981377145e-17	1.07537560211033e-16	9.68805636955614e-17	1.91659583031344e-17
2008026	20	6.85354497385724e-17	4.89673553898426e-17	3.37848206343841e-17	6.75369266319421e-17	1.07852799926698e-16	4.0574045686259e-17	1.07625127694886e-16	1.07805176108553e-16	1.00399079173132e-16	8.77890143432477e-17	5.6461315082053e-17	3.84013709322107e-17	8.03373822795554e-17	6.09769642136267e-17	1.07467409382986e-16	2.48903110251409e-17	1.07720032829997e-16	8.03424995854925e-17	1.71988295860118e-17
2008026	21	5.98752275906418e-17	4.04344284636093e-17	3.34245573721408e-17	7.13334925913623e-17	1.07891192143861e-16	3.74975532198283e-17	1.07229661103677e-16	1.0780862769325e-16	9.39347236286521e-17	7.82419823397392e-17	6.07230440225092e-17	3.91972516224593e-17	7.88639442237696e-17	6.35674027742089e-17	8.97387406523258e-17	2.51787336509625e-17	1.0776474606684e-16	7.56565807063104e-17	1.53386631806726e-17
2008026	22	5.07696307153331e-17	3.86848003183147e-17	3.26441756393776e-17	9.55959769439493e-17	1.07881049161904e-16	3.56548800797008e-17	9.93253556297174e-17	8.32833439221028e-17	8.67461739940581e-17	7.30535589228091e-17	6.5051630711355e-17	4.01729017861328e-17	7.72961375305005e-17	6.06270573016173e-17	9.91355369441326e-17	1.89686736384785e-17	1.08460888721293e-19	8.2718418281423e-17	1.09082749087696e-17
2008026	23	4.51006011092653e-17	3.71021568980743e-17	3.18638481515047e-17	8.02115926841436e-17	1.08568689553848e-16	3.30949180569569e-17	7.5111151657646e-17	7.23492847350354e-17	8.6740581247052e-17	6.94924656964201e-17	6.81061328578533e-17	4.13689046398615e-17	6.83188061181657e-17	5.83389048551942e-17	9.39142493692432e-17	1.32371741637833e-17	3.30047069899556e-17	8.74423246158152e-17	6.60519073561652e-18
2008027	0	4.26981951462736e-17	3.42350181449107e-17	3.08939425004478e-17	7.14649488020966e-17	1.08709239724071e-16	3.33828084282231e-17	6.75419356385556e-17	6.05784067395191e-17	8.40859591875153e-17	6.74001073464105e-17	7.09290605726798e-17	4.30430848714652e-17	5.58677030966928e-17	5.81882990864027e-17	1.07272742315123e-16	1.40777164354392e-17	6.40618174908393e-17	8.63351356272559e-17	5.37036151000224e-18
2008027	1	4.04919293971576e-17	3.06340043125485e-17	2.98935500360532e-17	6.30952835222992e-17	9.33586342342612e-17	3.38139172696529e-17	6.14869833618265e-17	5.31900414659488e-17	7.53169389168397e-17	6.36670040796735e-17	7.16463821249267e-17	4.53460179974572e-17	4.66110078291707e-17	5.91709053872526e-17	1.07049988552505e-16	2.28427530516798e-17	1.03412651590222e-16	8.52185586676876e-17	6.86264663084055e-18
2008027	2	3.67279673459845e-17	2.66067665243137e-17	2.90723127374446e-17	5.43675012291001e-17	6.86687082310963e-17	3.24716720760601e-17	5.68868416898935e-17	5.02671346269829e-17	6.57248901151171e-17	5.99540094937343e-17	6.91757335940361e-17	4.77858791824785e-17	3.68168039265056e-17	5.84124291638205e-17	7.03637106367615e-17	2.83039984270917e-17	9.50797161789592e-17	8.14186079170787e-17	7.73918480880344e-18
2008027	3	2.94334303150205e-17	2.09523329763339e-17	3.08443070682707e-17	4.63011049409458e-17	6.09740967846506e-17	2.93718688724375e-17	5.57367725695792e-17	4.85507413195378e-17	6.00149784967559e-17	5.61642008024338e-17	6.64063366422449e-17	4.97413215601183e-17	3.12032706725358e-17	5.77472296671226e-17	6.53042304757994e-17	4.10873999538898e-17	8.21399040919482e-17	6.85864217056635e-17	8.19355068922776e-18
2008027	4	1.68816746500221e-17	9.68270539495985e-18	2.86080654543221e-17	4.07442212926036e-17	5.69778821155255e-17	2.46336503668711e-17	5.40164693738492e-17	4.69734918709251e-17	5.63942355838141e-17	5.2133930540767e-17	6.46044952204928e-17	5.09474975969059e-17	2.91455208899413e-17	5.75878991736085e-17	6.06491041727281e-17	4.42753627310408e-17	8.49867438827382e-17	7.20231313723484e-17	8.74125031676149e-18
2008027	5	1.20466362647255e-17	4.30945173416995e-18	2.68687151089771e-17	3.72311846841985e-17	5.40714259368419e-17	1.47893235393442e-17	5.15210533406046e-17	4.54063594844579e-17	6.09998173480939e-17	4.87114619032507e-17	6.1120576138121e-17	5.15945212429973e-17	2.84981699222348e-17	5.41998361230077e-17	6.15900736282818e-17	4.15146822356934e-17	9.95631161382989e-17	1.07268985676238e-16	9.32509340789567e-18
2008027	6	9.17310012225791e-18	1.8906094018419e-18	2.52016933118938e-17	3.50617806174504e-17	5.18821388657647e-17	6.80928801924859e-18	4.8839120370054e-17	4.39379694305723e-17	7.53360448538359e-17	4.57886560019689e-17	5.80676689036275e-17	5.32360969637246e-17	2.85967907047225e-17	5.14653297904582e-17	5.96979089474718e-17	3.73757773952869e-17	8.85915573688681e-17	1.06598573046144e-16	1.00267392481307e-17
2008027	7	6.63420044993576e-18	1.46182985399137e-18	2.34600320995446e-17	3.29506889205191e-17	4.9795002616297e-17	2.79390190336762e-18	4.6719715314991e-17	4.21331196454814e-17	1.07490892716016e-16	4.29120592238854e-17	5.5973748542475e-17	5.48172150743652e-17	2.9065040985412e-17	5.08631430083188e-17	6.11582481503768e-17	3.28362382449048e-17	9.77646567184006e-17	1.05817326803937e-16	1.06163531935893e-17
2008027	8	6.07828905952375e-18	1.43977148959472e-18	2.19636501037508e-17	3.04175521142083e-17	4.85069821514164e-17	1.3116981684922e-18	4.45785073892142e-17	3.98566034961951e-17	1.07616614391368e-16	3.9694766465294e-17	5.52086842946028e-17	5.47958752621369e-17	2.98276368499108e-17	5.03312973334757e-17	6.42282657314973e-17	2.77923522646898e-17	1.07095913904302e-16	1.05075310352796e-16	1.06536427287037e-17
2008027	9	5.0279970752592e-18	1.31415438433129e-18	1.9709728386495e-17	2.79366615255181e-17	4.73524215927455e-17	7.55386453006632e-19	4.24738367416616e-17	3.75044686183152e-17	1.07630016881908e-16	3.62535523466772e-17	5.5310539012407e-17	5.55532066209952e-17	3.02921818168071e-17	5.00117698459384e-17	6.94051294232699e-17	2.29041103073545e-17	1.02343788063208e-16	1.01462410326791e-16	9.91095509923096e-18
2008027	10	3.92546456549789e-18	1.0937992665093e-18	1.76468053776541e-17	2.69122902826843e-17	4.60263693737006e-17	6.5431991585709e-19	4.05106716813454e-17	3.59933336106157e-17	8.36953927733161e-17	3.27455162016829e-17	5.93723538807043e-17	5.55449561015613e-17	3.18990406373841e-17	5.05557646666037e-17	7.28101805309902e-17	1.87513583149068e-17	1.00430834827952e-16	9.65647649081427e-17	8.59587460105801e-18
2008027	11	3.33754991063838e-18	8.08800412483278e-19	1.58370114152819e-17	2.7358785595418e-17	4.50779776511292e-17	8.58363626834435e-19	3.77926639983294e-17	3.48420460747408e-17	8.50759870741678e-17	2.99243670595384e-17	6.20479035180633e-17	5.49302783614453e-17	3.22956549669221e-17	5.01878960630619e-17	7.28785411148374e-17	1.62002431042202e-17	9.88872133609779e-17	8.87736408790464e-17	6.99759069698759e-18
2008027	12	3.13679191310966e-18	7.97152782523827e-19	1.46946102445296e-17	2.89164530234913e-17	4.44257014475984e-17	1.42584705501495e-18	3.53257641972328e-17	3.34329080694827e-17	7.66341653433933e-17	2.72251326559873e-17	6.02109247667395e-17	5.48780243819513e-17	3.21088993214751e-17	4.96078615463221e-17	7.41570927464226e-17	1.51452908305349e-17	9.44770217863904e-17	7.78134402206556e-17	5.55203784897134e-18
2008027	13	3.27691965714307e-18	1.15859714171965e-18	1.43415499468148e-17	2.96115830747399e-17	4.37342203665977e-17	1.7266148707392e-18	3.28589177245403e-17	3.18566275278432e-17	6.77186931251652e-17	2.40230789970726e-17	5.87984830017405e-17	5.49755486937074e-17	3.11269225408682e-17	4.86887079393402e-17	2.20289849856578e-17	1.5100325742369e-17	8.92183324770479e-17	6.73742369376507e-17	4.65663167467778e-18
2008027	14	3.71021114408039e-18	1.45909929532741e-18	1.41744141452966e-17	3.01263057523068e-17	4.30458515316852e-17	1.79774293219419e-18	3.04651048478332e-17	3.11682773919719e-17	6.05860520151504e-17	2.09400527252625e-17	5.76951014985811e-17	5.4624786141078e-17	2.98009419488438e-17	4.75767722118719e-17	6.06989003824827e-17	1.7465563293725e-17	8.15437456391618e-17	6.05497793774984e-17	4.17388099204433e-18
2008027	15	4.2894628378542e-18	1.60674498760266e-18	1.37467399331681e-17	3.06135540441066e-17	4.22513887235986e-17	2.50020197255331e-18	2.84602481696705e-17	2.97956310798741e-17	5.51373427699773e-17	1.86169502775835e-17	5.82704720970691e-17	5.47686717984823e-17	2.87105127151352e-17	4.68329288267694e-17	7.27919802110324e-17	2.10060339870798e-17	7.34387076690838e-17	5.72977862991626e-17	3.82830980815902e-18
2008027	16	4.46241997912559e-18	2.21946401251348e-18	1.30723102870188e-17	3.02476798369661e-17	4.14201215944251e-17	3.69019199208919e-18	2.6477014096352e-17	2.86306183828373e-17	5.17387515631726e-17	1.70915152752953e-17	5.88329693186134e-17	5.53730553424884e-17	2.764241475712e-17	4.63929446902221e-17	7.75689250056527e-17	2.38025922195095e-17	6.74912941997667e-17	5.62879727972588e-17	3.50276548686145e-18
2008027	17	4.22388761657066e-18	2.8795629188125e-18	1.23780118990189e-17	2.97639808680142e-17	4.07979229225835e-17	5.3093675153553e-18	2.50932459922437e-17	2.8018967156503e-17	4.99250246251325e-17	1.62600608512695e-17	5.93520048481218e-17	5.62168490301094e-17	2.64549107850877e-17	4.62158870163961e-17	4.28696740971596e-17	2.57468774601856e-17	6.25214527854548e-17	5.65621570953077e-17	3.1956811258338e-18
2008027	18	3.8994418567308e-18	3.34284004930737e-18	1.19921008553366e-17	2.87827136726091e-17	3.96395008747862e-17	7.27551545395956e-18	2.41072762472381e-17	2.74844785068476e-17	4.82027961938646e-17	1.55948098594545e-17	5.89741113019676e-17	5.64564334256785e-17	2.54425876424897e-17	4.62505099926841e-17	1.07556196312354e-19	2.77028663871112e-17	6.03088404782615e-17	5.62850932805083e-17	2.97499416747965e-18
2008027	19	3.4643281888985e-18	3.58748728507008e-18	1.17872855132229e-17	2.80943978315881e-17	3.9038160361861e-17	9.38645321498884e-18	2.33967227476168e-17	2.65539369222176e-17	4.64746943633163e-17	1.45287494095233e-17	5.82744500973257e-17	5.74028342507509e-17	2.61854260067756e-17	4.64787264248687e-17	2.54602397108718e-17	2.98287911250536e-17	6.13450627469598e-17	5.47484255861809e-17	2.87583530946882e-18
2008027	20	2.93877294589756e-18	3.69935672399459e-18	1.17519325319804e-17	2.73525299414397e-17	3.8467671457355e-17	1.10616829927382e-17	2.27308320516532e-17	2.57043549018314e-17	4.63612020723574e-17	1.31790564592799e-17	5.77325965160553e-17	5.85401979088988e-17	2.5649297956737e-17	4.66368413158053e-17	1.07101596845292e-16	3.24313262412302e-17	6.09150162701216e-17	5.40305041248544e-17	2.88496600162607e-18
2008027	21	2.33839829729197e-18	3.76766441487332e-18	1.14287161737884e-17	2.66348996521809e-17	3.76932240538322e-17	1.20048993837688e-17	2.21006351768874e-17	2.46217223550708e-17	4.69700488151243e-17	1.12842520484297e-17	5.78491247366485e-17	5.99359206380659e-17	2.5173335610031e-17	4.63121027455703e-17	1.06865449043809e-16	3.47845581257124e-17	5.95300638982485e-17	5.44360627685862e-17	3.01171491547042e-18
2008027	22	1.69805214739634e-18	3.79071257584899e-18	1.13266370683542e-17	2.60718526522123e-17	3.65311544532724e-17	1.19589149723235e-17	2.14760878558025e-17	2.32746700262252e-17	4.70746791070429e-17	8.97590031874248e-18	5.76557421660134e-17	6.10914033197918e-17	2.47557703348867e-17	4.64176676238586e-17	1.06574585798732e-16	3.59439144394674e-17	5.7806574877697e-17	5.43251611053378e-17	3.25272399751004e-18
2008027	23	1.14767767679231e-18	3.74390585116548e-18	1.12838117021751e-17	2.54488990453845e-17	3.50813857946745e-17	1.17344787933016e-17	1.92682095709299e-17	2.14628239325103e-17	4.62623873698509e-17	6.56511895532022e-18	5.67071441318817e-17	6.18823801349775e-17	2.46439346647928e-17	4.94221930856951e-17	8.25359652053291e-17	3.68656427770449e-17	5.63594504228709e-17	5.58746384204547e-17	3.61600996253608e-18
2008028	0	7.8916314550937e-19	3.59991081858681e-18	1.11841813844576e-17	2.48463618008474e-17	3.33829610703613e-17	1.1775894567058e-17	1.59950446568003e-17	1.92408808143783e-17	4.09620472133297e-17	4.62753048262485e-18	5.56857775368389e-17	6.25948335067038e-17	2.41975002337557e-17	5.00860978043843e-17	7.88047103413633e-17	3.7997914798535e-17	5.55263265784448e-17	5.29232328033708e-17	4.12767826184326e-18
2008028	1	5.49371469857545e-19	3.34143015910165e-18	1.1040396585128e-17	2.43922923894501e-17	3.16804165593609e-17	1.12774376575534e-17	1.26723414213356e-17	1.65707340644606e-17	3.4950322456993e-17	2.83526868848965e-18	5.42919895202023e-17	6.25087072061203e-17	2.35480660939499e-17	5.20028413206692e-17	6.94393965309759e-17	3.88393837150981e-17	5.47781256483306e-17	4.5279289418702e-17	4.86797194107239e-18
2008028	2	3.96825076196171e-19	3.00540099390806e-18	1.09748317456555e-17	2.39249932298737e-17	3.0487808617751e-17	1.03523513943963e-17	1.02563301662603e-17	1.35482711517951e-17	3.03013817803397e-17	1.52381802396981e-18	5.28337464197612e-17	6.25945380582652e-17	2.23416058256222e-17	5.19017511646021e-17	6.00221884338304e-17	3.87035918597866e-17	5.32792922402433e-17	3.73643887172142e-17	5.92581285954645e-18
2008028	3	3.38841971214548e-19	2.62089403267278e-18	1.10586521636188e-17	2.34081090712035e-17	2.93271830886236e-17	9.39537077931956e-18	7.80701257072974e-18	1.00564294278178e-17	2.63126751421422e-17	8.0508541210105e-19	5.2335567176881e-17	6.39587684556444e-17	2.13613947275224e-17	5.05056075877833e-17	5.36855613100904e-17	3.88066176883913e-17	5.2028772180923e-17	3.0425363326585e-17	7.0806230177003e-18
2008028	4	3.52268198791268e-19	2.06625421553295e-18	1.12935806689627e-17	2.28088959464774e-17	2.8575883370761e-17	8.57811531440582e-18	5.26201908297549e-18	6.9934676218663e-18	2.21870862523698e-17	4.57992137698083e-19	5.12665506188839e-17	6.55253897549425e-17	2.02963428689255e-17	4.83351600299013e-17	5.08994126115626e-17	3.87399830708061e-17	5.10733155529736e-17	2.38697094546136e-17	8.11107467206081e-18
2008028	5	4.30007099540653e-19	1.42132634774937e-18	1.15223754849311e-17	2.20410962266421e-17	2.72623559409575e-17	7.78721184441424e-18	3.21922706803235e-18	4.46211249735121e-18	1.77372209779644e-17	3.26638220299183e-19	5.03226949318253e-17	6.64167779274473e-17	1.77211363392843e-17	4.61260410738038e-17	4.88244187016523e-17	3.77097219003852e-17	4.9905539851616e-17	1.80732849222559e-17	9.27055459892839e-18
2008028	6	5.88542700862345e-19	1.06279640055358e-18	1.15981602147883e-17	2.17821859111479e-17	2.49734279602269e-17	7.01470354026964e-18	1.8367395576568e-18	3.13898761503121e-18	1.20663874018538e-17	3.79532651560112e-19	5.00192143384977e-17	6.46956758245184e-17	1.37881564536746e-17	4.42539900589542e-17	4.73437604637914e-17	3.78633905576145e-17	4.82171073066244e-17	1.24406766539212e-17	1.05123904429333e-17
2008028	7	8.82089430162108e-19	8.85947754975311e-19	1.15237415166183e-17	2.09340395345909e-17	2.04248636825214e-17	6.28980622921895e-18	1.04659605642229e-18	2.20197985808444e-18	7.37994160886361e-18	6.15999080729414e-19	4.94482379117556e-17	6.36810373182785e-17	9.74023930864738e-18	4.27654445943458e-17	4.63575182335726e-17	3.66197033847578e-17	4.6707324761195e-17	7.77100657298505e-18	1.17923760719209e-17
2008028	8	1.56662045439309e-18	8.01436318734908e-19	1.13661181903568e-17	1.94177772850675e-17	1.57324966854881e-17	5.67927854545866e-18	6.83357511168899e-19	1.48778054747402e-18	4.48869474251825e-18	1.14223993390799e-18	4.91420378810742e-17	6.29214931711679e-17	6.37835644256453e-18	4.14821762193014e-17	4.63723837423258e-17	3.55086951653267e-17	4.58602643170022e-17	4.15552781131397e-18	1.29730475325181e-17
2008028	9	2.42409715100096e-18	8.13164391668488e-19	1.12049012061737e-17	1.7758776308968e-17	1.13265922477097e-17	4.94979686245731e-18	6.5723055594792e-19	1.00656848795176e-18	3.12726835502109e-18	1.83924979829561e-18	4.92387966651462e-17	6.25337423969656e-17	3.88667225883284e-18	4.03888114489412e-17	4.65786036956875e-17	3.75594261455973e-17	4.5239235482585e-17	2.69542349616863e-18	1.40845764158321e-17
2008028	10	3.51602550383006e-18	9.81233321278682e-19	1.11036939427971e-17	1.57346691160636e-17	7.21334562123221e-18	4.08390021572532e-18	1.06651825195612e-18	7.96372945126407e-19	2.13904802131115e-18	2.50404924630413e-18	5.12215745108192e-17	6.24317824686573e-17	2.29271722968859e-18	3.93121436929188e-17	4.74981592448355e-17	3.75691328432869e-17	4.53916132217328e-17	1.73359827591631e-18	1.6248645030251e-17
2008028	11	5.26955711431679e-18	1.31942953768585e-18	1.13731270555826e-17	1.30595145724685e-17	4.59471921381301e-18	3.19442226797108e-18	1.91535890028988e-18	9.81250053426211e-19	1.37379543928116e-18	3.29424391775935e-18	5.29183728262255e-17	6.19939328515616e-17	1.8634629309679e-18	3.80540780275608e-17	4.93225632188025e-17	3.7256415924148e-17	4.67107374328328e-17	1.12813886415156e-18	1.63608576455748e-17
2008028	12	7.16692648872455e-18	1.88783960783962e-18	1.20647421478893e-17	9.86585895444558e-18	2.80574207219539e-18	2.30510734272205e-18	2.59959462567359e-18	1.49745866686975e-18	1.0713231110234e-18	4.84973427092009e-18	5.25126118635321e-17	6.19508822984458e-17	3.36183525976905e-18	3.67862367114473e-17	5.09780308988885e-17	3.66624101277063e-17	4.88075212308228e-17	1.03982871181364e-18	1.59495156350738e-17
2008028	13	8.81182426625209e-18	2.63260085129616e-18	1.14863261395222e-17	6.68661490759081e-18	1.66811796765279e-18	1.58754203307155e-18	3.88279143823428e-18	2.63109647629742e-18	1.2509437801595e-18	6.41490675389005e-18	5.10097910850963e-17	6.13363451504983e-17	4.61488702310989e-18	3.54567580661182e-17	5.25606206234755e-17	3.79831945899517e-17	4.97684726965224e-17	1.41081226853602e-18	1.52431233556615e-17
2008028	14	1.00655416837422e-17	3.50702832061577e-18	1.14669529554815e-17	4.14262972699698e-18	1.41165018043119e-18	1.27495736577156e-18	5.1340170276204e-18	3.75099645015291e-18	1.69389293259775e-18	8.20205233567476e-18	4.91625770206526e-17	6.02623355250417e-17	4.30289541741681e-18	3.3708026052918e-17	5.31127220043358e-17	3.65520981579744e-17	5.00592058659433e-17	2.61978697038126e-18	1.45384112334432e-17
2008028	15	1.12244311574745e-17	4.62480868019298e-18	1.10844251577318e-17	2.69034866066298e-18	2.02783747673453e-18	1.23962894471916e-18	6.73859324063208e-18	5.86005724388695e-18	2.52723419470965e-18	1.03736752345528e-17	4.59273631643888e-17	5.96096328152712e-17	6.06177623545131e-18	3.15435780294212e-17	5.01596038429833e-17	3.41242956581377e-17	4.90245939183077e-17	4.99102314873966e-18	1.39118805239356e-17
2008028	16	1.27669945055334e-17	5.69631865412601e-18	1.06157685807083e-17	2.30310194569467e-18	2.89997415946843e-18	1.31643083946321e-18	8.79789681141175e-18	8.70482035186082e-18	4.48135382890034e-18	1.26060261525932e-17	4.13393764269311e-17	5.97545248124154e-17	1.00565759516586e-17	2.92446820991918e-17	4.77634319440565e-17	3.20691807075188e-17	4.33738339036839e-17	7.18841304772304e-18	1.35553848707873e-17
2008028	17	1.52925809417689e-17	6.96771607724089e-18	1.03017212114074e-17	2.55950209466355e-18	4.44490793767937e-18	1.44479827077002e-18	1.03971268038614e-17	1.0445723282341e-17	6.93059710626437e-18	1.44702466633031e-17	3.39099664842886e-17	5.76886114110935e-17	1.47337890841743e-17	2.69302897212495e-17	4.60228484925836e-17	2.96151641306326e-17	3.41924795580136e-17	9.21653004084539e-18	1.30606093347938e-17
2008028	18	1.8764025089639e-17	8.33089986868644e-18	1.00764041292741e-17	3.1713197540456e-18	6.50305217705824e-18	1.68302108601493e-18	1.08472855381448e-17	1.11843113093926e-17	8.80486169774661e-18	1.57775934470504e-17	2.21151910713827e-17	5.4513007158248e-17	1.86330014788043e-17	2.48411035552477e-17	4.46566976832488e-17	2.71822795254971e-17	2.26433099085659e-17	1.18160890182583e-17	1.27579246990806e-17
2008028	19	2.14092080866589e-17	9.17406864239259e-18	9.97113160818093e-18	4.08293712122928e-18	8.27864279570717e-18	2.05590619486055e-18	1.16368495474778e-17	1.16059011243055e-17	1.04304419248502e-17	1.80922717217655e-17	1.45909442819215e-17	5.10136857008877e-17	2.21792550843663e-17	2.2967380295233e-17	4.33601327669084e-17	2.52038897690141e-17	1.36531456245676e-17	1.48602802829723e-17	1.25641825698592e-17
2008028	20	2.26057606399336e-17	9.56036773747472e-18	9.95975658778031e-18	4.99959838542e-18	9.28871008260433e-18	2.99451706220089e-18	1.54477003097896e-17	1.21054985592644e-17	1.22719490223515e-17	2.06266383747901e-17	1.2289967094484e-17	4.68112781919781e-17	2.59992453722047e-17	2.10889907798781e-17	4.22821433864541e-17	2.29273501588659e-17	7.3126935641003e-18	1.71154697635294e-17	1.242847090892e-17
2008028	21	2.31005961583564e-17	9.71642436060871e-18	9.93916352970316e-18	6.04290011763332e-18	1.00709981644788e-17	3.64563447966684e-18	1.81104829160875e-17	1.37325843973869e-17	1.43630784638175e-17	2.2586596660597e-17	1.13989821765581e-17	4.37075916467985e-17	3.00670288021746e-17	1.92627830489291e-17	4.13210936429146e-17	2.18008529594243e-17	3.66977066666692e-18	1.70119889636578e-17	1.23345053789183e-17
2008028	22	2.33046505453525e-17	9.44204672526437e-18	9.81991461128548e-18	7.29572884568446e-18	1.03075137990905e-17	4.23749244718942e-18	2.00516866530462e-17	1.58887421302784e-17	1.61244785145982e-17	2.43882132683968e-17	1.01960202959763e-17	4.08793664345305e-17	3.49690389061252e-17	1.75820647979633e-17	4.12811178184373e-17	2.1115371546096e-17	3.1383967917031e-18	1.73979251762492e-17	1.22514947178658e-17
2008028	23	2.37309479412928e-17	9.96744678758894e-18	9.60076049404408e-18	8.5903515689841e-18	1.07985489284959e-17	4.94375038625268e-18	2.14665299334368e-17	1.73609060829628e-17	1.62917518264823e-17	2.60100078737886e-17	9.25096404333275e-18	3.83147353014838e-17	4.83124340588805e-17	1.60705901158448e-17	4.10664551179176e-17	2.04309612350804e-17	3.50132632472285e-18	2.02842590956869e-17	1.21438843524819e-17
2008029	0	2.46472413969613e-17	1.1844476772416e-17	9.3846337080231e-18	9.88893918834185e-18	1.23255879345187e-17	6.0535008820559e-18	2.29797701449972e-17	1.86418052069985e-17	1.96675605572435e-17	2.76288320743641e-17	8.97707384157512e-18	3.57811198306589e-17	4.85703281452351e-17	1.49175197165679e-17	4.16182528119389e-17	1.96388961110282e-17	4.08380256426373e-18	2.57014041142899e-17	1.20223322274493e-17
2008029	1	2.57032142375558e-17	1.26904112726326e-17	9.20225015413303e-18	1.08238934183186e-17	1.41888827840002e-17	6.73616931401389e-18	2.42264654779251e-17	1.98983845309342e-17	2.50208997405032e-17	2.90874908806144e-17	9.11245396202351e-18	3.35051827784844e-17	4.43927057498704e-17	1.43201412819156e-17	4.21215257601432e-17	1.88781426865978e-17	4.68810700729208e-18	3.19983224110058e-17	1.1896496875255e-17
2008029	2	2.67814362295816e-17	1.32679801546879e-17	9.02241977444645e-18	1.1815400646067e-17	1.57530045915753e-17	6.77455267026273e-18	2.46248641767988e-17	2.09319258784601e-17	3.01976816893235e-17	2.98751972268508e-17	9.48186061611532e-18	3.18623944141616e-17	4.34384507611795e-17	1.45735724322962e-17	4.25155821869192e-17	1.82580304333613e-17	5.44848362167687e-18	3.75224921569202e-17	1.18054522361379e-17
2008029	3	2.84486208271845e-17	1.36967141505837e-17	8.87139351979175e-18	1.29500722438603e-17	1.70460095628521e-17	6.49460581809162e-18	2.40621662555669e-17	2.19952039920717e-17	3.26730955208778e-17	2.97571908116162e-17	1.00374056866697e-17	3.00798911137942e-17	4.19264928882747e-17	1.57297325640105e-17	4.27497646146034e-17	1.76841117142212e-17	6.33361531404077e-18	3.88392332423954e-17	1.17393395682467e-17
2008029	4	3.01337990191003e-17	1.41927622776016e-17	8.77495431545159e-18	1.41965271570901e-17	1.78835330664788e-17	6.2414147132607e-18	2.42742154223002e-17	2.2755072753093e-17	3.30213045636874e-17	2.98892079882609e-17	1.14664799026257e-17	2.81299363049821e-17	3.51322212491775e-17	1.74334713440544e-17	4.24938971523927e-17	1.70793233231212e-17	7.1946854591029e-18	3.68894104163696e-17	1.17536242693423e-17
2008029	5	3.21087623663348e-17	1.4892672513197e-17	8.71735630070888e-18	1.51491511577665e-17	1.85879157515579e-17	6.01736288776313e-18	2.43698934655495e-17	2.35423638687398e-17	3.23368124023806e-17	3.03718001213153e-17	1.36388554730711e-17	2.54813241406684e-17	2.82659896711141e-17	1.96279578638188e-17	4.03932884866669e-17	1.63313480180336e-17	8.45354174542496e-18	3.5138617762529e-17	1.18560493431919e-17
2008029	6	3.44408184711867e-17	1.47106274774931e-17	8.58912411476796e-18	1.59619589603348e-17	1.97049543474357e-17	5.81681752533292e-18	2.51245091837923e-17	2.47017781931488e-17	2.88455329206127e-17	3.40158712975397e-17	1.62598042410168e-17	2.18509514854071e-17	2.85856770034149e-17	2.18261205409038e-17	3.68185225817401e-17	1.54309702364959e-17	9.97255093052017e-18	3.29266962205942e-17	1.19725813644127e-17
2008029	7	3.56632261852276e-17	1.45239395058701e-17	8.33547689614107e-18	1.64308908985589e-17	2.08008884637573e-17	5.65566916005429e-18	2.85752503342138e-17	2.59523665445434e-17	2.73329092413616e-17	3.82102236895496e-17	1.97390265649913e-17	1.78666724386642e-17	2.95193903313098e-17	2.25299846413422e-17	3.30078494925058e-17	1.44995317008209e-17	1.17305884755337e-17	3.06615681603236e-17	1.27188708264516e-17
2008029	8	3.56057876762206e-17	1.44599778764108e-17	8.07502128139539e-18	1.6975589706662e-17	2.14376254414109e-17	5.50299639143883e-18	3.17670311330842e-17	2.68388766723176e-17	2.69732214183547e-17	4.12399617907242e-17	2.32314901967798e-17	1.43359958162702e-17	2.59474869101575e-17	2.14618863774524e-17	2.87397954284887e-17	1.36193574217699e-17	1.30165580594515e-17	2.8932262999647e-17	1.39918185607717e-17
2008029	9	3.51579570901253e-17	1.43829807108408e-17	7.83115159919254e-18	1.83888554517388e-17	2.15749559627527e-17	6.00216944700882e-18	3.75753845912673e-17	2.66473063495631e-17	2.78669855700586e-17	4.27009208191555e-17	2.66739096615442e-17	1.22624564588958e-17	2.06080834407185e-17	2.15473979437831e-17	2.4280943716262e-17	1.26484762125789e-17	1.35613247370839e-17	2.8026679855226e-17	1.48213270493342e-17
2008029	10	3.45001777871744e-17	1.45161799238448e-17	7.61726575150546e-18	1.91813680449302e-17	2.16302375029514e-17	7.83194386583817e-18	3.96154771470506e-17	2.57193222668036e-17	3.17328270807775e-17	4.25551971196092e-17	2.95601375993695e-17	1.13584451643525e-17	1.44879384393197e-17	2.55510227443747e-17	2.02713956717617e-17	1.03419287020802e-17	1.45539410923879e-17	2.86238416589225e-17	1.54724436336188e-17
2008029	11	3.39240712965888e-17	1.41878217732103e-17	7.43496207802102e-18	2.0213152787979e-17	2.18042541094824e-17	1.02824635888823e-17	4.06320683195364e-17	2.5622526179883e-17	3.81090688363253e-17	4.15914144133017e-17	3.24178242908605e-17	1.08197109578114e-17	9.4180866092607e-18	2.42866449408073e-17	1.7811641926136e-17	6.34571636851391e-18	1.6032124765651e-17	3.41807920059451e-17	1.56381470952503e-17
2008029	12	3.16693179176369e-17	1.37157680393725e-17	7.12521838737117e-18	2.16817729697467e-17	2.20569021011057e-17	1.06494550850788e-17	4.00446582927894e-17	2.67701091441017e-17	4.04089327331599e-17	3.94412477455999e-17	3.51814000156969e-17	1.10144511312431e-17	6.81008330684799e-18	2.36042656278736e-17	1.68581799457614e-17	5.63776347872959e-18	1.68641511345372e-17	3.70868660917055e-17	1.59289574538607e-17
2008029	13	2.87103406600105e-17	1.35185333971058e-17	6.87538557878736e-18	2.2906679881876e-17	2.31052323498002e-17	1.03103183860705e-17	3.82174429637021e-17	2.77686523179131e-17	4.11100163851307e-17	3.68570133853752e-17	3.78266429050958e-17	1.2430339644253e-17	7.43696267047502e-18	2.37670950307652e-17	1.56488983808162e-17	5.62829284757038e-18	1.75688601276587e-17	3.79799902164003e-17	1.67108435140026e-17
2008029	14	2.66022719427121e-17	1.36858498993395e-17	6.7799014580975e-18	2.33210905584426e-17	2.4127869653289e-17	9.79678571413013e-18	3.58605304232222e-17	2.74235532925819e-17	4.04836089868817e-17	3.45762594542229e-17	4.00333795160556e-17	1.44862802019243e-17	8.39953703403393e-18	2.45263036341283e-17	1.41266623962333e-17	6.26235823883137e-18	1.86746380941924e-17	3.76629383467663e-17	1.77599631899096e-17
2008029	15	2.48156493545818e-17	1.34415237965654e-17	6.51102714951827e-18	2.32593883339258e-17	2.47681467471967e-17	9.36151824542796e-18	3.3433374356506e-17	2.65714076473959e-17	3.89889879030476e-17	3.33428137060198e-17	4.17629761999097e-17	1.65532520670507e-17	8.94837613432059e-18	2.36834952060176e-17	1.2591852233627e-17	6.372979799355e-18	1.97408416329527e-17	3.58971069572932e-17	1.7983900961978e-17
2008029	16	2.46793555002397e-17	1.31144097173648e-17	6.34530373177585e-18	2.22898223898366e-17	2.46409555224842e-17	8.99042151141884e-18	3.109819512207e-17	2.53001878147359e-17	3.73954606244641e-17	3.27958808015319e-17	4.27812002674532e-17	1.8384705452794e-17	1.10839456704893e-17	2.28888486498135e-17	1.13160375275846e-17	6.07814030138787e-18	2.06578033647689e-17	3.37844193755542e-17	1.80058399443255e-17
2008029	17	2.48473799884841e-17	1.26889483993349e-17	6.21026770863236e-18	2.03028233062989e-17	2.39734353175066e-17	8.61077342543543e-18	2.9244362123278e-17	2.38208422047152e-17	3.54084472345886e-17	3.16143419776569e-17	4.19438955475224e-17	1.97253690488908e-17	1.44229136538775e-17	2.28211138565922e-17	1.0245331485204e-17	5.77672360387246e-18	2.10380922407072e-17	3.21276008062813e-17	1.79620289671263e-17
2008029	18	2.49850121882761e-17	1.22397562427869e-17	6.08076540813859e-18	1.84965839419372e-17	2.27377050140704e-17	8.23443818730157e-18	2.81465703400692e-17	2.20874698939851e-17	3.27350892298006e-17	2.3725239125734e-17	3.61375395624555e-17	2.01542153413767e-17	1.85526755292465e-17	2.29295472865846e-17	9.34039695456126e-18	5.53405918970972e-18	2.09333679826937e-17	2.98812634200756e-17	1.76298803703299e-17
2008029	19	2.51331213382752e-17	1.18091213290046e-17	5.93911294162408e-18	1.6823459469127e-17	2.17757948668154e-17	7.91459289357276e-18	2.5387658302619e-17	2.05255647590427e-17	2.99697872533772e-17	1.10248664606951e-17	3.10420125429607e-17	1.75416801666927e-17	2.20423948452768e-17	2.29421781539159e-17	8.60884689751587e-18	5.36681281905027e-18	2.07471987549383e-17	2.63024119127717e-17	1.75095302640778e-17
2008029	20	2.52517061216721e-17	1.13952609531487e-17	5.81943352894756e-18	1.52974097760114e-17	2.03505375316927e-17	7.67986215157468e-18	2.01827321358693e-17	1.9125176967873e-17	2.76910611948208e-17	5.49338784426388e-18	2.79128396738227e-17	1.57049799507694e-17	2.47785354535164e-17	2.26366385650649e-17	8.06668460142286e-18	5.26731535441813e-18	2.07421838241404e-17	1.92369134953618e-17	1.63921202768618e-17
2008029	21	2.63228920239952e-17	1.09888809698799e-17	5.70256665746984e-18	1.39227632203231e-17	1.86835063764389e-17	7.5334328404894e-18	1.42791129373491e-17	1.90637052356093e-17	2.49555726775999e-17	4.04180914365765e-18	2.62271748449372e-17	1.53445970883097e-17	2.80358394977302e-17	2.22633301358372e-17	7.7252321191489e-18	5.19800325067979e-18	2.20003852154222e-17	1.20988077853577e-17	1.56377461512871e-17
2008029	22	2.75415017261873e-17	1.11728471812652e-17	5.55703954408654e-18	1.26901687796966e-17	1.78455399250849e-17	7.43644183861129e-18	1.04195317269468e-17	1.96561086983927e-17	2.09692800447538e-17	8.17586358775513e-18	2.57253968518416e-17	1.63810862720782e-17	3.06570615081739e-17	2.21456242009681e-17	7.61047510432872e-18	5.21684876357767e-18	2.35230436018226e-17	1.12033633769831e-17	1.54571660201366e-17
2008029	23	2.75831859194841e-17	1.11280192455309e-17	5.42957761320058e-18	1.16284042173533e-17	1.76963305262144e-17	7.38701607277732e-18	8.27063228499568e-18	2.03732405811394e-17	1.63616965565909e-17	1.36761419109701e-17	2.65689096635225e-17	1.81115480398317e-17	3.32011493109816e-17	2.23898961489011e-17	7.73895667717184e-18	5.36954670775526e-18	2.50934836048364e-17	1.01686277781359e-17	1.57829262896729e-17
2008030	0	2.35429640099351e-17	1.1047562491548e-17	5.24856518302318e-18	1.0747926560512e-17	1.76127176534153e-17	7.32316715881748e-18	6.55631390339058e-18	2.11638974542533e-17	1.32635742700631e-17	2.15310021878793e-17	2.80812452331424e-17	1.92802882904903e-17	3.55047976343734e-17	2.29335589201668e-17	8.08378749102935e-18	5.59212059650926e-18	2.62307430592335e-17	1.03692766135121e-17	1.67056039533891e-17
2008030	1	1.51226381150755e-17	1.10552348380762e-17	4.98334771946369e-18	1.00481140667892e-17	1.74821032433883e-17	7.20475511120086e-18	5.81492989679514e-18	2.17168412939996e-17	1.10669009739775e-17	1.96430436324711e-17	2.94659875977058e-17	1.98574631568919e-17	3.81548532899922e-17	2.35811475771507e-17	8.5508080987203e-18	5.7885677109911e-18	2.60904119308192e-17	1.24880532711179e-17	1.82583568414379e-17
2008030	2	7.0349245547505e-18	1.11962467297865e-17	4.74142899059571e-18	9.48763231723584e-18	1.72691516232422e-17	7.0180902901632e-18	5.52799436280529e-18	2.19390394533659e-17	7.71181567529558e-18	1.812472147474e-17	3.19310740097835e-17	2.08017171432693e-17	4.09763777653367e-17	2.43132288212353e-17	9.04489858815031e-18	5.92628435676351e-18	2.52672000661397e-17	1.49793555408835e-17	2.03695397594304e-17
2008030	3	1.07764944118549e-17	1.12924828981225e-17	4.58711538179974e-18	9.06246560247318e-18	1.69936292298728e-17	6.74647173581288e-18	4.86309481836502e-18	2.24995786703044e-17	5.09828442899427e-18	2.72167165502085e-17	3.32396427353866e-17	2.24025853440419e-17	4.40275505509458e-17	2.51538629696842e-17	9.52214707936194e-18	6.10752027470367e-18	2.32385408023381e-17	1.77910896999069e-17	2.15290987801515e-17
2008030	4	2.15550762023405e-17	1.1376859423478e-17	4.4609375972631e-18	8.75029656538665e-18	1.72578389306207e-17	6.4139999798798e-18	8.93534916913353e-18	2.14683868937437e-17	3.56761770696429e-18	3.17210859116453e-17	3.4386272681182e-17	2.43209894695455e-17	4.66796800331595e-17	2.59828309274358e-17	9.95846631080942e-18	6.4610687865222e-18	2.11170308971834e-17	1.98713537419356e-17	2.40847849537623e-17
2008030	5	3.85913585505083e-17	1.1683573353363e-17	4.41277217802827e-18	8.61607720618629e-18	1.77241868775457e-17	6.05885109596922e-18	1.47963403227706e-17	1.7147324742317e-17	1.12627577335574e-17	3.65335636432088e-17	3.55449545670777e-17	2.66049629940301e-17	5.32386125354487e-17	2.66285042008654e-17	1.03764784442112e-17	6.96852915647146e-18	1.8909435823631e-17	2.10357723832469e-17	2.54904933058883e-17
2008030	6	4.92413524960002e-17	1.22640503451615e-17	4.38552414996209e-18	9.58882615745224e-18	1.77427004728007e-17	5.70223465499425e-18	2.01872067476391e-17	1.34094868166671e-17	1.96378409809011e-17	4.30929737951268e-17	3.74382914997368e-17	2.94890419084859e-17	5.40725666732558e-17	2.71894548271123e-17	1.0813589546742e-17	7.74763701103518e-18	1.67793072099655e-17	2.16037724354753e-17	1.94361938841284e-17
2008030	7	5.49219512690972e-17	1.27479711226053e-17	4.42008402034909e-18	9.76644090334212e-18	1.6995832443963e-17	5.33046294076202e-18	2.50764925861428e-17	9.10701930166203e-18	2.44261175851814e-17	5.13450100496971e-17	3.98700034755331e-17	3.45525632183408e-17	5.48457305054219e-17	2.76688309009961e-17	1.13316581986979e-17	8.35658030570257e-18	1.56195420960527e-17	2.25654625268196e-17	9.36420348136565e-18
2008030	8	5.79979335841184e-17	1.34921129850589e-17	4.5931125710398e-18	9.99686047147584e-18	1.55683617855258e-17	5.024188548385e-18	3.36481901453235e-17	6.90349004211673e-18	2.70743536020318e-17	5.85714359780154e-17	3.97424004814955e-17	3.90961539294722e-17	6.41349531327944e-17	2.82187181062404e-17	1.19908739722834e-17	8.87674391845393e-18	1.42696217276499e-17	2.37282152377563e-17	1.19661849764864e-17
2008030	9	6.09318775792897e-17	1.46068076744164e-17	6.18833089447867e-18	1.08879400161543e-17	1.2603176564736e-17	5.46037874101881e-18	4.77023983784565e-17	1.08656803972937e-17	3.04120624164431e-17	6.21352854084996e-17	4.07555940216609e-17	4.24164715881447e-17	6.65087107817292e-17	2.90071505048465e-17	1.25039732573606e-17	9.1040004306492e-18	1.29091589169216e-17	2.75148874790867e-17	2.37607305049377e-17
2008030	10	6.30605156846022e-17	1.58391834708673e-17	6.55703334160489e-18	1.12414227054813e-17	9.6263977454987e-18	5.47651684340752e-18	6.17232493816412e-17	1.9795368156714e-17	3.9139955999348e-17	6.43996244040642e-17	4.0628634856976e-17	4.40323603483693e-17	7.42177808482672e-17	3.00684191043285e-17	1.28013246435357e-17	9.07128241553067e-18	1.21223429193026e-17	4.64683862825422e-17	3.67277388784266e-17
2008030	11	6.3718656263565e-17	1.53615707662809e-17	6.6496067782064e-18	1.22445097993821e-17	7.24780941687647e-18	7.11151469153898e-18	1.07175026531926e-16	2.90364844614444e-17	7.20577322775223e-17	6.7327009754189e-17	4.07693964266389e-17	4.51337795261267e-17	7.90008678826171e-17	3.1052980866876e-17	1.3003969804282e-17	8.75786640821357e-18	1.17177593705452e-17	1.22488784239693e-16	4.38398504372985e-17
2008030	12	6.60447327890501e-17	1.34553374930547e-17	6.66681881836877e-18	1.32309625170631e-17	1.17630629900407e-17	9.15178591806182e-18	1.06769011337212e-16	3.6683981685606e-17	1.22711087284835e-16	7.23419124226902e-17	4.11354339411205e-17	4.67504642694815e-17	7.81297010321203e-17	3.16969250619816e-17	1.31993452279907e-17	8.27532814633997e-18	1.16857020295223e-17	1.22400774239664e-16	5.58623032720714e-17
2008030	13	7.07536475885149e-17	1.54560253887655e-17	6.84429231680048e-18	1.36222652493791e-17	2.55619686309645e-17	1.14365615113303e-17	1.06560778377164e-16	4.52032839906362e-17	1.20369820355969e-16	7.91051501186346e-17	4.13130144024912e-17	4.79027209282202e-17	7.13728327487679e-17	3.20327052368527e-17	1.37189333439532e-17	7.61386806679396e-18	1.16126237473485e-17	1.21622559617736e-16	1.06854384535198e-16
2008030	14	7.43135058810995e-17	2.09155927793492e-17	7.45587772224487e-18	1.16775322376814e-17	3.90745308977793e-17	1.31990133597981e-17	1.06805330069296e-16	7.15785433916013e-17	1.14798735571472e-16	8.87173649175888e-17	4.19449705842138e-17	4.86534370997605e-17	6.66414685932354e-17	3.28177159055561e-17	1.3986184087621e-17	6.84662078523082e-18	1.13904896329026e-17	1.17654716287192e-16	1.07045769389137e-16
2008030	15	8.52927648648162e-17	2.74597892943652e-17	8.45398033805267e-18	1.18010014441308e-17	4.99164558698805e-17	1.44702185552011e-17	9.43015768555447e-17	1.01905613057585e-16	1.04450471689174e-16	1.07831109728284e-16	4.09519941117252e-17	4.953283018203e-17	6.42519464410637e-17	3.27894897990069e-17	1.42037790204771e-17	6.07133432232323e-18	1.0266763980754e-17	9.8752273581799e-17	9.14968701999538e-17
2008030	16	8.6364766047299e-17	3.69138741351648e-17	9.86143178838573e-18	1.4736517715293e-17	6.22806459532324e-17	1.44284588371971e-17	9.08522887657004e-17	1.00407204446618e-16	1.01630769088917e-16	9.52907820668555e-17	4.0722876294389e-17	4.86862225851577e-17	6.19688768957943e-17	3.33121525039284e-17	1.47282016025586e-17	5.43293342928575e-18	8.54881810996131e-18	9.92889431827007e-17	7.06892594944927e-17
2008030	17	9.90943156097252e-17	4.13803599169778e-17	1.04357528019406e-17	2.02826274732481e-17	8.09296635025204e-17	1.40160104494921e-17	8.94367500310422e-17	1.07383995200972e-16	1.03014864298775e-16	8.29630516841187e-17	4.10085823410456e-17	4.79081894211741e-17	6.03919502519797e-17	3.42257857874126e-17	1.54002274866878e-17	4.91897632601505e-18	7.74330872463348e-18	1.10768239470879e-16	7.15055273009401e-17
2008030	18	9.29935601259451e-17	5.08379375794935e-17	1.05843430828966e-17	2.95437571656224e-17	1.07673873974838e-16	1.59949707857991e-17	7.80033794138505e-17	1.07406864417956e-16	1.03453658444463e-16	8.12227939719845e-17	4.23638730622842e-17	4.82824166552028e-17	5.8197485018361e-17	3.52851693492003e-17	1.59280309504277e-17	4.5091785449044e-18	1.00383802163152e-17	1.07118881791227e-16	7.55843614288864e-17
2008030	19	8.91887647433179e-17	6.02638777181622e-17	1.07487893973811e-17	3.73281803746384e-17	1.07421536259545e-16	2.15211941851396e-17	7.2883961542782e-17	1.07446573186258e-16	1.0754999025127e-16	8.05742770225998e-17	4.52305464683917e-17	4.85118572551739e-17	5.80495384999272e-17	3.65464816079237e-17	1.55163186055148e-17	4.38019436351857e-18	1.59378117144177e-17	1.02508944332733e-16	7.67432482271149e-17
2008030	20	8.73827749097087e-17	6.05420038337617e-17	1.05613105621887e-17	4.69776163921411e-17	1.07760323457791e-16	2.74835175952179e-17	7.53039620140343e-17	1.0746991104956e-16	1.07638186932293e-16	7.57884815009614e-17	4.92439065436713e-17	4.89031845994469e-17	6.0035884885224e-17	3.82748504651425e-17	1.4970513435544e-17	4.72425756373855e-18	2.22475980048936e-17	9.36147480689839e-17	6.79749530892101e-17
2008030	21	8.54701858739115e-17	5.80883612760346e-17	1.04203317030183e-17	5.8991242896849e-17	9.29853007902181e-17	3.27483981481301e-17	7.18143839824708e-17	1.07573245425722e-16	1.07438906511048e-16	7.33029053298317e-17	5.37624085192643e-17	4.8853534708535e-17	6.26292126669035e-17	3.96710380752156e-17	1.47093039859997e-17	5.84950962365456e-18	2.83532395066839e-17	1.00590532219339e-16	6.19730253004202e-17
2008030	22	8.23246844146107e-17	5.75023911358363e-17	1.14814014607586e-17	6.51065485529218e-17	1.07595169741803e-16	3.90616546707422e-17	6.89475733680205e-17	9.02161864279953e-17	1.0769737881874e-16	7.2511605694453e-17	5.86829353588588e-17	4.75892830753906e-17	6.37937506850126e-17	4.08737584619396e-17	1.36039613198123e-17	1.01935709763455e-17	3.61405208521572e-17	1.07819264858053e-16	5.79475761777932e-17
2008030	23	7.72035638455663e-17	6.02028324182349e-17	1.58396895510544e-17	6.53870175830225e-17	1.07621968100208e-16	4.66420880919662e-17	6.6811022663767e-17	7.95929152813445e-17	9.40206894299776e-17	7.13194934218348e-17	6.209340680256e-17	4.58311730785033e-17	6.74958227639001e-17	4.23596782096182e-17	1.22556799052592e-17	1.29825466572107e-17	4.81007782270441e-17	7.25093656189773e-17	5.51246146469163e-17
2008031	0	7.105631645756e-17	6.37634785399256e-17	2.0549163552898e-17	6.34218147450392e-17	1.07623705443388e-16	5.16745636650502e-17	6.63796177106547e-17	7.77400064478109e-17	7.00559855631541e-17	6.9026258527918e-17	6.2228888652326e-17	4.41200765372947e-17	7.11031292874669e-17	4.3660071901811e-17	1.10583516526597e-17	1.94886333835812e-17	6.00164290558944e-17	6.47734184113379e-17	5.35244361919254e-17
2008031	1	6.6434293536197e-17	6.18806131914665e-17	2.43056145380751e-17	6.25757119022146e-17	8.06023710001441e-17	5.47920960980783e-17	6.47899492588749e-17	7.6132158767916e-17	6.64273231387519e-17	6.52777659638695e-17	6.07592271052635e-17	4.33395472076741e-17	7.25087952073272e-17	4.72142628646317e-17	1.01662278983228e-17	3.08235650075777e-17	6.56051182378796e-17	6.50688841973249e-17	5.20832236334101e-17
2008031	2	6.13414460491065e-17	6.30265253214011e-17	2.73742116984611e-17	6.23063244641631e-17	7.31462805477908e-17	5.65565863994798e-17	6.13021403295724e-17	7.30197310644347e-17	6.56180044355134e-17	5.93507504189487e-17	5.9928073324501e-17	4.39013772659189e-17	6.99506998325813e-17	5.88415131408723e-17	9.60264569843028e-18	4.1312111911518e-17	6.89471339901595e-17	6.56501718903785e-17	5.12175023552373e-17
2008031	3	5.72076346188457e-17	6.41497748639139e-17	2.9420371825648e-17	6.01566789814208e-17	7.12370383359255e-17	5.61306337291017e-17	5.66412353279879e-17	6.91254157184855e-17	6.42945957903399e-17	5.36379304674687e-17	6.1495828528407e-17	4.51867150926119e-17	6.62508230746156e-17	6.47382396136408e-17	9.03458466857808e-18	4.70896611042452e-17	7.47208483662445e-17	6.54711310704194e-17	5.17921137142452e-17
2008031	4	5.42428865433537e-17	6.54170318002108e-17	3.10163286458447e-17	6.13196413923763e-17	6.96514101411889e-17	5.66199041344597e-17	5.22260377229806e-17	6.49853119360489e-17	6.19623816771712e-17	5.0167081459884e-17	5.88326877733633e-17	4.73991749513997e-17	5.99859718553799e-17	6.28528527870267e-17	8.66773923842045e-18	4.85774390647728e-17	1.09437659532002e-16	6.36434290020292e-17	5.36416605626971e-17
2008031	5	5.176401576259e-17	6.66931835753491e-17	3.26105867580258e-17	6.41826735385706e-17	6.74186809582445e-17	5.81545781361492e-17	4.90648117897968e-17	6.12988425775386e-17	5.8028944447038e-17	4.71743229788603e-17	5.83691193808291e-17	5.02306424494976e-17	5.43161163605656e-17	5.97054363136644e-17	9.07957283464918e-18	4.80355118686309e-17	1.08466763015037e-16	6.0167035892812e-17	5.58342628923754e-17
2008031	6	4.95084497127025e-17	6.80064086344804e-17	3.30235388131475e-17	6.65959131344312e-17	6.51958452802614e-17	5.96216880207463e-17	4.68500211238166e-17	5.71226573172665e-17	5.41306276904603e-17	4.44049559694874e-17	6.20883717812168e-17	5.26332628307806e-17	5.14280117295015e-17	5.78704572646422e-17	1.17261713243925e-17	4.87942264399019e-17	1.08197720061181e-16	5.61233105320688e-17	5.45212470370888e-17
2008031	7	4.77952556884296e-17	6.94072293869489e-17	3.29619189080105e-17	6.77635798098713e-17	6.45204074304245e-17	6.11561651913698e-17	4.47290704178734e-17	5.48659607885749e-17	5.19394152268234e-17	4.15739346285698e-17	6.78162862637791e-17	5.63562738586218e-17	3.9009318613235e-17	5.60696354289137e-17	1.6213935637973e-17	5.08195143717151e-17	1.08034926558844e-16	5.1811577981321e-17	5.37441082002227e-17
2008031	8	4.65450280801913e-17	6.97192663808797e-17	3.30940284309019e-17	6.77439476057503e-17	6.45262207304639e-17	6.35545191337556e-17	4.28390535785758e-17	5.65646810705896e-17	5.00816524386652e-17	3.87716951951508e-17	7.21644644780872e-17	6.11675357950542e-17	3.11325472246908e-17	5.50192943505039e-17	1.98892001821543e-17	5.28197845100754e-17	8.1708022416713e-17	1.07533950131453e-16	5.48941538655808e-17
2008031	9	4.60606618198844e-17	6.84159684541738e-17	3.36323792431795e-17	7.01149464568601e-17	6.52684365658838e-17	6.64208130761103e-17	4.1886732975022e-17	5.84608652073908e-17	4.90959039706605e-17	3.6071544861518e-17	7.44812567401584e-17	6.40147839966573e-17	2.72351597273514e-17	5.47400610603317e-17	2.58427041335268e-17	5.36178319577222e-17	7.605829520385e-17	1.08430912924472e-16	5.38141275166129e-17
2008031	10	4.58159432829162e-17	6.45299547091852e-17	3.37605065613417e-17	7.48327366209551e-17	6.93626000470847e-17	6.87024974111404e-17	4.15868607334034e-17	5.65623961647853e-17	5.10143816711288e-17	3.4832641283798e-17	7.34439891381573e-17	6.7842209310123e-17	2.3389855973253e-17	5.75672815447916e-17	3.27226053267022e-17	5.38415057375145e-17	7.06553060324199e-17	5.34636498903506e-17	4.80239547126941e-17
2008031	11	4.39837555114731e-17	6.18513662370582e-17	3.4315488985373e-17	7.70145217704038e-17	6.942390899646e-17	6.98379010027769e-17	4.06716022384053e-17	5.36891095077189e-17	5.40094042734093e-17	3.45134796021356e-17	7.00995797204977e-17	6.79102578867164e-17	1.97264544743922e-17	5.14316223800076e-17	3.82341760513307e-17	5.78683126520628e-17	6.69169456905205e-17	5.01287097553836e-17	4.1722866089283e-17
2008031	12	4.24342224021427e-17	5.79322549289777e-17	3.54130177626265e-17	7.42399217788715e-17	6.3693432658094e-17	6.89215663845897e-17	4.02099355888718e-17	5.18575407468716e-17	5.32436011864823e-17	3.29980731494236e-17	6.62330003187946e-17	6.75580145197059e-17	1.66200518233143e-17	4.51755541736633e-17	4.19321281317934e-17	5.88344188042463e-17	6.35720081170983e-17	5.08924757904602e-17	3.69027943730944e-17
2008031	13	3.76945516262962e-17	5.4002075075898e-17	3.49665752038585e-17	7.08807982849376e-17	5.99442504091286e-17	6.23706103599809e-17	3.77854088303846e-17	5.10866119138723e-17	5.02051809718107e-17	3.12784810974833e-17	6.20500956680965e-17	6.28688382305151e-17	1.74784348867221e-17	3.26964531798394e-17	4.53692135576081e-17	6.16548653331139e-17	6.13475459664938e-17	4.85452068935678e-17	3.04282714946341e-17
2008031	14	3.15729877324757e-17	4.94965692818939e-17	3.4412194327985e-17	6.081995849509e-17	5.8085383529802e-17	5.70226147099192e-17	3.61275176838645e-17	4.95977099481206e-17	4.76762660502447e-17	2.73368879019538e-17	5.65635666157517e-17	5.68252576312605e-17	1.80921978984392e-17	2.82523742191251e-17	4.84561569740354e-17	6.38163268828032e-17	6.40994722525048e-17	4.61620488556073e-17	2.20838710176289e-17
2008031	15	2.78368434237059e-17	4.5728331389684e-17	3.44595265940651e-17	5.31719830625258e-17	5.51402948396028e-17	5.30550896278634e-17	3.34153064193637e-17	4.64246805469023e-17	4.56790017260408e-17	2.40725065111749e-17	5.35229663259143e-17	5.39833840483954e-17	1.80258519189317e-17	2.81660868483971e-17	5.02946925989669e-17	6.75376797192252e-17	6.79353362836493e-17	4.3918322921376e-17	1.48750512121751e-17
2008031	16	2.55116177959807e-17	4.2280697304806e-17	3.4656895285581e-17	4.8175317356073e-17	5.03117525129978e-17	5.04755644337708e-17	2.99459113319394e-17	4.20954475437522e-17	4.28274129498539e-17	2.73117881204539e-17	5.2237518632279e-17	5.48145030754501e-17	2.98786142369903e-17	2.77830545983368e-17	5.14537019761511e-17	6.74923256011651e-17	6.97957979900097e-17	4.15811495529032e-17	7.01857086581144e-18
2008031	17	1.90700082247249e-17	3.81673752834305e-17	3.60430986844631e-17	4.45429606688611e-17	4.55507407300921e-17	4.7321900319685e-17	2.80806852350617e-17	3.71893800521001e-17	3.98441083566014e-17	4.15883305040625e-17	5.37803668122722e-17	5.85919249122066e-17	5.88123320029567e-17	2.69285729765325e-17	5.26124721200327e-17	6.44974301753009e-17	7.1090042988454e-17	3.8905160128445e-17	2.73948595374219e-18
2008031	18	2.91111336362738e-17	3.35622708457975e-17	3.58343652481558e-17	4.13108485207788e-17	4.09873922741959e-17	4.3811368742164e-17	2.64945646204158e-17	3.19891433577013e-17	3.5566708158417e-17	9.44102006089648e-17	5.5808273396889e-17	6.11333344416957e-17	9.0166846282837e-17	2.6236231316076e-17	5.39067422965741e-17	5.950763246429e-17	6.64402985742073e-17	3.56147705464316e-17	4.27457797529128e-18
2008031	19	9.16404409907175e-17	2.92602371702933e-17	3.59181303193168e-17	3.78984064562721e-17	3.67080270731842e-17	4.02280182874272e-17	4.01492191576085e-17	2.49025176079576e-17	2.80086913549508e-17	5.95016888437961e-17	5.78718532827163e-17	6.26316024979817e-17	7.96361089363434e-17	2.66475094274186e-17	5.53182673272882e-17	5.28901371654608e-17	6.122978237177e-17	2.9353059142728e-17	1.41406103190364e-17
2008031	20	6.39517874789486e-17	2.492101278984e-17	3.51884040482568e-17	3.45355102964341e-17	3.17244802900865e-17	3.65838364540531e-17	1.07418049769375e-16	1.81760181718905e-17	2.34240653467696e-17	3.01932649288694e-17	6.06891883892136e-17	6.28980981101124e-17	1.0691971006954e-16	2.8775457370182e-17	5.95095319434906e-17	4.51050883900621e-17	5.65757671606468e-17	2.58084283497686e-17	1.9306889576406e-17
2008031	21	9.77364200924173e-17	1.95578932227619e-17	3.32456486939647e-17	3.10054452464984e-17	2.53036115799356e-17	3.28302412505778e-17	1.07711712470381e-16	3.50350815045626e-17	3.70801904137459e-17	9.18474257824644e-17	6.30996256956168e-17	6.16881694639232e-17	7.13951916236483e-17	3.6103240366256e-17	6.25656544052993e-17	3.81012027329263e-17	5.26545183616888e-17	3.95520604477932e-17	1.07241683565093e-16
2008031	22	9.80606484058312e-17	1.39543459959875e-17	3.05809585301715e-17	2.67831712386467e-17	1.97964839457552e-17	2.97341580932319e-17	1.07962619321455e-16	9.28412243127228e-17	1.08183215981752e-16	9.03555236530744e-17	6.47170353641707e-17	5.998193519345e-17	7.41734808587244e-17	1.04674989558018e-16	6.41045721437352e-17	3.47305829380433e-17	4.85743658596355e-17	1.0092554543446e-16	6.75938530734113e-17
2008031	23	8.0991660693227e-17	1.14825919421781e-17	2.80338687279838e-17	2.17688425658391e-17	2.97255840379391e-17	2.75054240891889e-17	7.66871739143368e-17	9.81614320771492e-17	9.81030731527164e-17	7.55727288690494e-17	6.65942714159364e-17	5.84603406567032e-17	5.82707221584977e-17	1.04819121994269e-16	6.37266798666158e-17	3.24379786254089e-17	4.44785697571998e-17	6.82337756092653e-17	5.41578305188926e-17
2008032	0	6.0952898909328e-17	1.43424441285302e-17	2.58954935183201e-17	1.72903261342692e-17	1.0759075129954e-16	2.5074373314862e-17	7.37373650776827e-17	1.07803151131819e-16	1.08053930559693e-16	8.21075627049858e-17	6.51425646809149e-17	5.8707041980219e-17	7.47272562305306e-17	5.94260581107386e-17	6.29226456439449e-17	3.00478254307572e-17	3.89430907133559e-17	8.68086839661031e-17	4.19034746188335e-17
2008032	1	5.62017628456769e-17	2.0150862316267e-17	2.38308984602486e-17	1.56246692189626e-17	6.47374820454132e-17	2.19950999156975e-17	7.55210784229539e-17	7.28860267799838e-17	1.08338278937535e-16	1.08478076839983e-16	6.34836040560751e-17	6.03024615645477e-17	1.08384966764683e-19	5.72725787312023e-17	6.36136471294677e-17	2.82592931097537e-17	3.28636865059744e-17	1.08038335285822e-16	3.57091050470962e-17
2008032	2	9.68082648608575e-17	2.2017024153838e-17	2.17010407183997e-17	1.6004474438783e-17	4.88365289013122e-17	1.86756808168327e-17	7.20005973740093e-17	6.13946721612445e-17	8.72868629688019e-17	9.94829308141405e-17	5.97160524719075e-17	6.18383549524163e-17	2.28812069677455e-17	5.51882207736774e-17	5.99588905704518e-17	2.67297823217081e-17	2.77179064577904e-17	8.14602414345986e-17	3.55227555115142e-17
2008032	3	1.05573714550684e-16	2.37948561685511e-17	1.9596036348713e-17	1.63843136404013e-17	5.51684561486675e-17	1.57078634966949e-17	1.08257909367571e-16	6.39914600584977e-17	7.31491010660189e-17	7.02482688705198e-17	5.47397721672505e-17	6.27926293939878e-17	6.75131765958279e-17	5.09373404802328e-17	5.33817729415146e-17	2.485936538438e-17	2.42367612913376e-17	7.46046244640989e-17	5.38873348774572e-17
2008032	4	8.97740538130607e-17	2.5899316244964e-17	1.71958419731302e-17	1.62031610390862e-17	5.49175791541253e-17	1.31190390916833e-17	7.62101035243215e-17	5.92612676782507e-17	1.08307090461917e-16	5.69000161803447e-17	4.98374185779398e-17	6.35361406196736e-17	6.53792937356029e-17	4.77519590339386e-17	4.69226573298032e-17	2.27101852538142e-17	2.50280172955366e-17	1.08328213217069e-16	5.84853230280186e-17
2008032	5	9.70121365938849e-17	2.60210627801787e-17	1.49084914944304e-17	1.06275020086179e-16	4.91179504503011e-17	1.0932080003699e-17	7.48262542386726e-17	5.78662375034871e-17	9.34217390996743e-17	7.45989543046802e-17	4.56314520607417e-17	6.32198840821695e-17	7.83358820715289e-17	4.65322143397289e-17	4.09317804358044e-17	2.03165538323162e-17	3.18982544868546e-17	3.29897298634832e-17	4.83716210482929e-17
2008032	6	5.3891810774171e-17	2.6491527171576e-17	1.28456504072364e-17	1.06468972563588e-16	4.35953784794614e-17	9.27077992417225e-18	7.04820917319792e-17	5.82001969648481e-17	5.6859795800897e-17	9.92443167636534e-17	4.12711037161782e-17	6.27685904867944e-17	7.52753478581263e-17	4.55094656995807e-17	3.50513072743565e-17	1.81536332716231e-17	4.09785121546699e-17	6.88768935157775e-17	4.40847809143291e-17
2008032	7	8.51920481550859e-18	2.74058891858421e-17	1.10457223415203e-17	1.06486212175412e-16	4.0704133856758e-17	8.16774978316616e-18	7.41648511237706e-17	5.75645105094833e-17	8.08783147301558e-17	1.07670805707458e-16	5.25291585274276e-17	6.23541251633968e-17	6.86990408512718e-17	4.3763658671782e-17	2.97699380736902e-17	1.66805375237063e-17	4.57798273478513e-17	8.38575564773097e-17	4.66282081189463e-17
2008032	8	4.22820575090972e-17	2.94420447821372e-17	9.24635504761035e-18	6.67049507914143e-17	3.98620941564773e-17	7.42638056304975e-18	7.12579593636152e-17	5.84987093489801e-17	7.95814542856596e-17	7.4513924180416e-17	7.75147155197067e-17	6.17637853205144e-17	6.16063433787389e-17	5.3139658686665e-17	2.53096203481828e-17	1.52938332362403e-17	1.05945509843877e-16	4.7730356048572e-17	5.09913550191889e-17
2008032	9	5.24989014512764e-17	3.13421405820218e-17	7.38679580345924e-18	5.33198546944724e-17	4.01295587539333e-17	7.13653849755814e-18	7.35841353377562e-17	5.83330951797295e-17	8.16412427661906e-17	8.16536073962008e-17	8.09005888073036e-17	6.12718239588885e-17	6.0638533469419e-17	5.49600920124803e-17	2.19753791701303e-17	1.3997937169558e-17	1.05735902426034e-16	1.08564240430742e-19	5.58332955386311e-17
2008032	10	1.08716595451247e-16	3.31648228557263e-17	5.74281078070063e-18	5.38592071033968e-17	4.21794738062463e-17	7.51124426062311e-18	5.61006221663905e-17	5.7149592455912e-17	9.0090624971182e-17	6.88041299021367e-17	9.26952814755936e-17	6.02183026560712e-17	7.06252823829892e-17	7.3779981479659e-17	1.96613570633488e-17	1.29240892012285e-17	1.05926047776974e-16	4.31788932582323e-18	6.07856816026477e-17
2008032	11	1.08723748962914e-16	3.41028775677812e-17	4.28807570862629e-18	5.58215176262022e-17	4.47981494395021e-17	8.56487207449298e-18	6.11893256441931e-17	6.68334286898799e-17	9.17524902163566e-17	1.08579702153009e-19	7.8246828598928e-17	5.7077870714191e-17	6.02158105176187e-17	6.51660088623888e-17	1.80879341439881e-17	1.2109364027229e-17	1.05939389447605e-16	2.52136457154598e-17	6.3255072558387e-17
2008032	12	1.08780798826322e-16	3.53230318092194e-17	3.31923617823591e-18	5.9478982882332e-17	4.68568748865828e-17	9.9093663607333e-18	3.70408261914407e-17	6.78898905807247e-17	5.42989367409611e-17	4.66204453882106e-17	6.95027317293452e-17	5.35786012611633e-17	5.90593630254991e-17	6.18450961513046e-17	1.70081211038404e-17	1.14753725309256e-17	1.06004417040562e-16	3.05154535648163e-17	6.30428518024988e-17
2008032	13	1.08729868472243e-16	3.73329735950451e-17	3.44511779532842e-18	4.91554109034697e-17	4.76693971343312e-17	1.06601727620503e-17	1.08554508951359e-19	6.90327313488147e-17	2.78240953795525e-17	9.66839780016718e-17	6.27706212328959e-17	5.01034239277916e-17	4.86536819009822e-17	5.95284536999321e-17	1.6411226838522e-17	1.07825149193554e-17	6.07936070341436e-17	8.47230086665592e-17	6.08237086182651e-17
2008032	14	9.59760512693564e-17	4.04994531484267e-17	5.67192681720192e-18	3.532366927369e-17	5.00973792578433e-17	1.23463903443494e-17	1.32894548117754e-17	1.08360848882529e-16	7.50002642149774e-17	6.6099027652698e-17	5.89621402638616e-17	4.66284572550723e-17	4.35996687715442e-17	5.84619402134017e-17	1.64560596155056e-17	1.00642160316663e-17	5.92801991679097e-17	1.02984041215504e-16	6.53921557297043e-17
2008032	15	8.60234712484882e-17	4.35972567632805e-17	9.46390556235872e-18	3.42686246891618e-17	5.33942405096684e-17	1.60776861142508e-17	7.89303795847297e-17	1.08289042363736e-16	8.0869319627572e-17	4.22439981004456e-17	5.87358208562088e-17	4.37699543163769e-17	4.38584421954147e-17	5.89960173058723e-17	1.72529950115314e-17	9.21731855289806e-18	7.80202979464424e-17	1.08099856400811e-16	8.26351652834475e-17
2008032	16	8.79362760456812e-17	4.45343682216702e-17	1.3791371042366e-17	3.67830483081619e-17	5.51197395524187e-17	1.9309683823802e-17	9.11982129391494e-17	1.08113695093837e-16	8.00145534826545e-17	2.58849832563864e-17	6.23720248912032e-17	4.17604872372434e-17	4.60874261525336e-17	5.554683509886e-17	1.84008762458556e-17	8.10853408847821e-18	8.3542407103618e-17	7.21041456428235e-17	1.07658765857692e-16
2008032	17	4.40845958660128e-17	4.57546577478611e-17	1.52434238374594e-17	3.86252837570506e-17	5.73026017957503e-17	2.17487470603169e-17	1.07616860935706e-16	7.76093367327018e-17	7.42447304744581e-17	6.15709704784778e-17	1.07749312144371e-16	4.03395912921705e-17	4.93186277730729e-17	5.46840129293161e-17	1.94515542759977e-17	7.11797175857736e-18	8.02527742451795e-17	8.43266695307776e-17	7.95234292696625e-17
2008032	18	6.96759194217374e-17	4.96654721805934e-17	1.18178153941752e-17	4.07526911251089e-17	6.04907854747774e-17	2.46594895989687e-17	1.07464813977083e-16	7.39778760798054e-17	1.08121280076723e-16	4.60547637044909e-17	1.07814659140132e-16	3.91019760697465e-17	5.11870443344939e-17	5.35249881562844e-17	2.0279474110971e-17	6.15786134203464e-18	1.05757674539001e-16	1.07868424745203e-16	5.61604266869592e-17
2008032	19	9.25654292887571e-17	5.40088307878644e-17	7.65757040892505e-18	4.37292740056661e-17	6.37884856351426e-17	2.84168569033647e-17	1.07047070422137e-16	6.82962740738819e-17	1.08159843233313e-16	7.22859402750517e-17	1.07503443988991e-16	3.78397538207308e-17	5.19428871283324e-17	5.14254817161319e-17	2.04790213346092e-17	4.56793629278041e-18	7.769893667521e-17	1.07940880865427e-16	4.54782764642881e-17
2008032	20	7.91845964374429e-17	5.6730503146809e-17	3.8419139383281e-18	4.68340863003161e-17	6.53781131632816e-17	3.13599646534591e-17	1.06549617988409e-16	6.81247760817153e-17	1.07872516726888e-16	1.06783533775344e-16	9.66269259332577e-17	3.65888706296334e-17	5.26058115385825e-17	5.05871549588044e-17	2.05428147215571e-17	3.1200634444752e-18	4.07713942837115e-17	1.07766822827804e-16	4.52005690679265e-17
2008032	21	9.53561554038553e-17	5.72163012364341e-17	2.71994982643134e-18	5.04092130181864e-17	6.467010006475e-17	3.54572579726196e-17	1.06736555432545e-16	6.53697245907402e-17	7.32076095947501e-17	1.0101847287861e-16	5.49543759143894e-17	3.50324435408877e-17	5.20865096116822e-17	4.96268191134434e-17	2.03975709881728e-17	2.84039212591617e-18	3.71024380208217e-17	1.07412159292791e-16	8.51070063172834e-17
2008032	22	7.84698218177542e-17	5.49088528421245e-17	4.83429530109671e-18	5.25343894673586e-17	6.08362927852171e-17	4.02664389532533e-17	7.48879900207945e-17	6.08331425457597e-17	7.07411069462557e-17	6.85536691338327e-17	7.45448028155102e-17	3.29691925621237e-17	4.70726565716656e-17	4.84420438726428e-17	2.00219274508234e-17	3.56177628445158e-18	6.0297975757577e-17	1.07248790241736e-16	3.46409715617619e-17
2008032	23	6.62362977473708e-17	4.74311346508389e-17	9.36231261119315e-18	5.18973564576567e-17	5.55374238731681e-17	4.45774557260204e-17	7.23122030021951e-17	6.38331670671448e-17	1.07245271937904e-16	9.20792534981537e-17	7.00636191183823e-17	3.02173133807048e-17	4.1547158140747e-17	4.58220976241992e-17	1.92938312614038e-17	3.85988779170241e-18	1.06859914727834e-16	1.07690495626605e-16	6.32487427415839e-17
2008033	0	8.26501906460691e-17	4.12701642626083e-17	1.20727513185532e-17	4.9631000945802e-17	5.05599855176126e-17	4.7202791364625e-17	8.07226598405654e-17	7.04938029269935e-17	7.26578425268257e-17	7.81400121780887e-17	9.35326710814016e-17	2.85058557587946e-17	3.81274166526283e-17	4.32711299948444e-17	1.80644389144673e-17	3.50610935661869e-18	1.07420930157006e-16	5.99279106167173e-17	5.63913315295079e-17
2008033	1	7.64673099078314e-17	4.46772581859433e-17	1.54105532217326e-17	4.57146901506179e-17	4.88970806969122e-17	4.87791973868877e-17	5.98068257277675e-17	7.1347682612237e-17	6.19810917520753e-17	5.18324918874499e-17	9.00395441697887e-17	3.21912995832518e-17	3.59186186327776e-17	3.96872793990051e-17	1.71500983324258e-17	6.1181055957325e-18	5.95395157947105e-17	5.00807009653718e-17	9.26217239132046e-17
2008033	2	6.97061368343267e-17	5.79753857273056e-17	2.1277621662874e-17	4.13744106952218e-17	5.10323386588573e-17	4.74099218649843e-17	4.81036461001508e-17	7.08556139086e-17	4.86515588021067e-17	5.26682906708305e-17	5.05054627579819e-17	3.86395856690091e-17	3.64406996313495e-17	3.56879598255366e-17	1.73811549016652e-17	2.13734937099111e-17	4.9813083322851e-17	4.41267034301872e-17	9.45379627659586e-17
2008033	3	6.24849109076786e-17	6.57307384654994e-17	3.01778982000775e-17	4.17601323045386e-17	8.98397633385091e-17	4.36723771762552e-17	4.85208555265631e-17	6.82731408027004e-17	4.34833876710376e-17	5.11951260091294e-17	4.95592334721086e-17	4.29774254065527e-17	4.12844140284269e-17	3.62645360511082e-17	1.83328222942201e-17	3.24285382096567e-17	5.03642381823639e-17	4.10240176328548e-17	1.07863874693154e-16
2008033	4	5.51235523136826e-17	7.16059148863353e-17	3.90875735467701e-17	4.82343193232034e-17	5.32071323038671e-17	4.25833631512434e-17	4.73377032106734e-17	6.27416179427489e-17	4.20744646585992e-17	5.01295883696672e-17	4.84126943110651e-17	4.56760179896231e-17	4.91996604330363e-17	3.99954594528953e-17	1.78979174235865e-17	3.91504466461601e-17	4.83247763060851e-17	3.80608892792e-17	1.07707349809811e-16
2008033	5	6.21554056425506e-17	7.3660458422453e-17	4.60234843669247e-17	5.44495980459935e-17	6.29505607663147e-17	4.55024064554726e-17	4.56825539906585e-17	5.86516551149408e-17	4.1227652478159e-17	5.08935085593475e-17	4.68513245844185e-17	4.74432715650471e-17	5.63284377614694e-17	4.28637772130252e-17	1.63632941382118e-17	4.29621906651301e-17	4.57623256072499e-17	3.67915154052646e-17	1.07487327964557e-16
2008033	6	1.09197704973801e-19	7.24724868116965e-17	5.10811693277446e-17	5.79913313986213e-17	5.99159880834308e-17	4.96199601622712e-17	4.28087182715167e-17	5.31682717893677e-17	4.25320554371273e-17	4.52627257480422e-17	4.5675028406064e-17	4.67943729530434e-17	5.88059474009384e-17	4.50542061166655e-17	1.45891415935369e-17	4.36651773376989e-17	4.50790199466335e-17	3.78884545762877e-17	1.07197394390095e-16
2008033	7	1.08465034644605e-16	6.93283308326413e-17	5.28968242676528e-17	6.02284118140272e-17	5.56373488762251e-17	5.72130621060031e-17	4.46700414562473e-17	4.86721211426905e-17	4.30873716406244e-17	9.16153905587035e-18	4.46753168277719e-17	4.69680550894948e-17	6.05799908837579e-17	4.73904343848561e-17	1.30192034714276e-17	4.19121188793002e-17	4.81734890446121e-17	4.27134241213699e-17	7.75085883606487e-17
2008033	8	7.98298922483697e-17	7.37200328482806e-17	5.27579545514497e-17	6.09174462118061e-17	5.29602014378297e-17	6.1293268902767e-17	5.80878785786421e-17	6.14219443364283e-17	5.1824120991985e-17	9.79805420338113e-17	4.43238009093651e-17	4.97475465983118e-17	6.31817670722959e-17	4.87674958771747e-17	1.25521451795853e-17	4.09266844437973e-17	5.20417061758513e-17	4.98152290183336e-17	6.81312612994585e-17
2008033	9	9.08456922955687e-17	7.38278980256133e-17	5.29159016564874e-17	5.9186606144027e-17	7.10591182469393e-17	6.25325352896485e-17	7.04815364728003e-17	1.08435912925312e-19	5.8369799892115e-17	1.08129082249183e-16	4.48328075566166e-17	5.33234886285388e-17	6.77531478504942e-17	4.98331734293642e-17	1.50204839628047e-17	4.20121909428035e-17	5.33781940757735e-17	5.58759144493205e-17	6.53631972824944e-17
2008033	10	8.63516285740136e-17	7.85392491842689e-17	5.3317166035656e-17	7.58397363503463e-17	3.72183035427798e-17	6.21375189460836e-17	1.08038698736198e-16	9.4998864912245e-17	6.92073304364088e-17	1.01976583033879e-16	4.33697086942228e-17	5.52062488318503e-17	7.16470909424342e-17	5.33207176673583e-17	2.02179173542826e-17	4.48459154396398e-17	4.99299063436357e-17	6.24514315456657e-17	6.38840257990807e-17
2008033	11	9.29878403724818e-17	8.3777690051619e-17	5.26574877041938e-17	7.1024138436062e-17	7.70590805321576e-17	6.94849296726481e-17	1.02080809889389e-16	9.65962882418371e-17	1.08112149563658e-16	7.65465490329972e-17	3.92980584210966e-17	5.39147467884739e-17	7.01073103050121e-17	5.65416979605488e-17	2.6526416090696e-17	4.75308133358075e-17	4.65682017267964e-17	7.43951181341677e-17	6.23691127143467e-17
2008033	12	8.50045186680064e-17	8.30891459505941e-17	5.35847883788356e-17	1.07335380696816e-16	6.84816266806802e-17	1.05911798784108e-16	8.28412328705546e-17	9.82094847072342e-17	1.08078405107556e-16	6.862442748816e-17	3.64426715864452e-17	4.98314452972743e-17	7.4682029207835e-17	5.83138558743068e-17	3.19813887508116e-17	5.15326456978844e-17	4.47892594673445e-17	8.66068190553212e-17	6.11165628482783e-17
2008033	13	7.08187970283191e-17	7.59492166587897e-17	5.60548559474301e-17	7.98705646853215e-17	8.45422018096611e-17	8.16193824063622e-17	7.30150294336398e-17	9.48441770845004e-17	1.07995089792071e-16	6.57897148419409e-17	3.66016694801948e-17	4.61026687151451e-17	7.2995326610145e-17	6.08375279217074e-17	3.61674375035726e-17	1.05652152633212e-16	5.12066833703786e-17	8.79160460532499e-17	6.04224592693713e-17
2008033	14	6.11729241177024e-17	7.44092021890757e-17	5.5604552575172e-17	6.34673550697467e-17	1.04711778848727e-16	9.43349979510145e-17	6.57625210484634e-17	9.14776369071674e-17	9.19335154451251e-17	6.03305166492955e-17	3.59117883915429e-17	4.43597227494652e-17	6.78265067301534e-17	6.08767732464785e-17	3.94197203739144e-17	1.05497021048538e-16	6.86267571326362e-17	8.59396193504513e-17	6.04561467055e-17
2008033	15	5.83323511838049e-17	7.314773869453e-17	5.42966850370594e-17	7.40975702926868e-17	1.00389572880519e-16	1.05945348890732e-16	6.27015479982965e-17	7.14959237101927e-17	8.67437029144813e-17	8.08094689359556e-17	3.5826737476219e-17	4.37555528860824e-17	6.34249559202778e-17	5.93152664295904e-17	3.95720026290784e-17	1.05382958271613e-16	7.02902317200016e-17	9.10205460103196e-17	5.93101400210103e-17
2008033	16	5.99299987808139e-17	6.28393032405241e-17	5.34711062912436e-17	9.7270189163985e-17	8.28847055881772e-17	9.45354706994305e-17	7.13169402538496e-17	6.43238757930929e-17	7.8281614617623e-17	7.38190752446949e-17	3.64774283784382e-17	4.41885104770279e-17	5.93760639334295e-17	5.79079556898725e-17	3.90469391756187e-17	1.05597445904666e-16	8.05754699413686e-17	9.52325464573172e-17	5.61662203380712e-17
2008033	17	7.82504136811598e-17	5.00706758909001e-17	5.22656150399144e-17	7.89292456706346e-17	7.01469571166336e-17	6.63296316405934e-17	6.43178874388418e-17	6.04064430734125e-17	7.21574932580107e-17	5.82833806807253e-17	3.50134617157545e-17	4.37411175058026e-17	5.75941980877646e-17	5.50630248861777e-17	3.88726661923456e-17	1.05773689426605e-16	1.02504423216697e-16	8.54062420630719e-17	5.45064048344673e-17
2008033	18	1.11996995539787e-19	4.20881235177002e-17	5.18073037360593e-17	6.48946616171208e-17	6.45425410100607e-17	4.47729547742895e-17	5.2490977166496e-17	5.65232429851097e-17	7.33676297167887e-17	4.72306708713843e-17	3.76672662013752e-17	4.07162237847491e-17	5.84521228073039e-17	5.31087665936168e-17	3.97148206092576e-17	1.05366719078235e-16	8.73427528865043e-17	7.76809758816136e-17	5.30536516800763e-17
2008033	19	1.08869325066706e-19	4.24008459765643e-17	5.09005210568192e-17	5.44000729848993e-17	6.13205100523096e-17	5.15756429606596e-17	4.80976132028206e-17	5.73804532975875e-17	7.60203220365601e-17	5.35491468176151e-17	4.078585193955e-17	3.77536602124989e-17	5.89437129451695e-17	5.35486094701934e-17	4.23830119731543e-17	6.82357692634113e-17	8.56432587042712e-17	7.42529943876473e-17	5.20983950956526e-17
2008033	20	3.1600279461477e-17	4.54410323379279e-17	5.03475429262953e-17	4.79364388131348e-17	5.78060714966414e-17	5.43674041504328e-17	5.13578917240779e-17	5.17167396156345e-17	7.69183869528933e-17	5.30516828874882e-17	4.47696401059399e-17	3.52708618317965e-17	5.85389997561251e-17	5.57533321495405e-17	4.77038033484369e-17	6.35289561757496e-17	7.3722601236461e-17	7.3975377412308e-17	5.16969382926148e-17
2008033	21	3.41371484620308e-17	4.69551809049898e-17	4.99448071767801e-17	4.40749320264744e-17	5.48432411831924e-17	5.46981171659371e-17	5.20644924038406e-17	5.11895093100197e-17	7.36907596273052e-17	4.70707235175983e-17	4.82554367475442e-17	3.51440735500546e-17	5.82936004474906e-17	6.00066295553327e-17	5.33666452714448e-17	5.66074634433571e-17	6.48336559699379e-17	7.53469787744089e-17	5.18499836474196e-17
2008033	22	3.21379860603955e-17	4.7776031755359e-17	4.95915136723775e-17	4.12674703630301e-17	5.30630072814257e-17	5.36872562298158e-17	4.79327723251964e-17	1.07307607356195e-19	6.96072496337666e-17	3.91080565583641e-17	5.06782985140636e-17	4.3593739603811e-17	6.17525176328045e-17	6.02803133770507e-17	5.80820954514237e-17	5.28070847104785e-17	5.86698875983966e-17	7.01540220836704e-17	5.26103418907643e-17
2008033	23	3.03078971177796e-17	4.86728625709726e-17	4.94530756569603e-17	4.11306266901479e-17	5.11361252789026e-17	5.29973247588476e-17	4.10508558273245e-17	1.06888285253815e-19	6.23649899820461e-17	3.26276135505305e-17	5.23674638530658e-17	5.4213235726054e-17	6.50570793069432e-17	5.73076756051742e-17	6.0703346835183e-17	4.99166981561735e-17	5.54984336349561e-17	6.5128395229815e-17	5.35823352862958e-17
2008034	0	2.86297482561271e-17	4.95140066255243e-17	4.96310213538772e-17	4.36006376980457e-17	4.72422743244644e-17	5.27613553212553e-17	3.45441651469157e-17	3.20365493770603e-17	5.20251726663552e-17	2.8442576694199e-17	5.38576405101071e-17	5.64457919283758e-17	5.43464100442037e-17	5.51938530322197e-17	6.23792114257672e-17	4.82040274471235e-17	5.34361513460188e-17	1.0825066240363e-19	5.42860504305626e-17
2008034	1	2.76735584388637e-17	4.98969028218378e-17	4.98929933807237e-17	4.59169983779475e-17	4.44032919601262e-17	5.29992396455437e-17	2.97826044657344e-17	3.39102538668175e-17	4.30617157078767e-17	2.57720176697013e-17	5.45718503571299e-17	5.56882303038293e-17	4.02383625515884e-17	5.50458449117666e-17	6.12954733492916e-17	4.76835715823316e-17	5.17280488619112e-17	1.08014802858213e-19	5.4718501332667e-17
2008034	2	2.90175003431461e-17	5.046668692856e-17	4.99244661478035e-17	4.7280569305661e-17	4.20906754951413e-17	5.31298144051122e-17	2.67143342118988e-17	2.84957515931237e-17	3.62988085244761e-17	2.43401812098657e-17	5.33358025147147e-17	5.23809239706819e-17	3.8292802618262e-17	5.63591844891006e-17	5.85403128042676e-17	4.81652522592842e-17	5.0177331813805e-17	4.17408185511284e-17	5.54988358987684e-17
2008034	3	3.08674652022343e-17	5.10972371912231e-17	4.91747048988353e-17	4.80988240345472e-17	3.99874951834488e-17	5.28997247548526e-17	2.49933301296606e-17	2.90063508904787e-17	3.08479020331143e-17	2.40695817022744e-17	5.44319825338203e-17	4.90375589850628e-17	4.22417577208175e-17	5.52934208176078e-17	5.64202607236621e-17	4.97635853271636e-17	4.74398295699412e-17	3.22319055876502e-17	5.61733096430039e-17
2008034	4	3.2360185425371e-17	5.18066985447776e-17	4.82487428340095e-17	4.89848187094992e-17	3.99932051705688e-17	5.31067512687768e-17	2.40216252841045e-17	3.52863524238065e-17	2.72386527912645e-17	2.51939070559438e-17	5.70916884781541e-17	4.70886154526305e-17	4.21167849689798e-17	5.4148192777666e-17	5.53351534649794e-17	5.04929404534377e-17	4.26350104021033e-17	2.99528020320755e-17	5.56623557451648e-17
2008034	5	3.42627972906414e-17	5.23505976881526e-17	4.7368998156336e-17	4.97919303914555e-17	4.19544266440089e-17	5.33433763948569e-17	2.41035262630998e-17	3.96105400089847e-17	2.54057813681946e-17	2.66842787049686e-17	5.76696490718757e-17	4.72227747258557e-17	4.07096299758971e-17	5.25794501720824e-17	5.35278646714943e-17	4.88407726811597e-17	3.75846508444401e-17	2.84080347967704e-17	5.4276783599841e-17
2008034	6	3.68654160719385e-17	5.3049806248446e-17	4.6509205894244e-17	5.09376179202223e-17	4.40366624346353e-17	5.36470906383792e-17	2.56130432806702e-17	4.19647336673287e-17	2.46173727271422e-17	2.82981382022096e-17	5.75477288398861e-17	4.84372833081833e-17	4.04604478775955e-17	5.13082260646594e-17	5.02954848878828e-17	4.78844529604587e-17	3.56655851237972e-17	2.92075964547145e-17	5.2651470488338e-17
2008034	7	3.99377451988177e-17	5.34318125068052e-17	4.57637813582636e-17	5.16375991294279e-17	4.55522448828988e-17	5.40515043811013e-17	2.75442807726705e-17	4.43975221052488e-17	2.51186101569554e-17	2.90910614966864e-17	5.72115959174115e-17	4.93477516093329e-17	3.97065749745598e-17	5.0591955485001e-17	4.73409571303612e-17	4.75730814008428e-17	3.5988923133342e-17	2.69292066623031e-17	5.14844289266997e-17
2008034	8	4.32960242993592e-17	5.30829754639063e-17	4.57759785259681e-17	5.23531815262847e-17	4.70031578788179e-17	5.44401988438153e-17	2.90040657175711e-17	4.72930149030934e-17	2.65780093040256e-17	2.95619290710524e-17	5.68730807976366e-17	4.93119946321205e-17	3.88974095086236e-17	5.01858989378124e-17	4.58234781530988e-17	5.23645118027177e-17	3.72773889275724e-17	2.56115406929592e-17	5.12918308622786e-17
2008034	9	4.73682886349426e-17	5.41419473584256e-17	4.37150146985612e-17	5.31473033909513e-17	4.93785814059244e-17	5.56312241533855e-17	3.07227139732728e-17	5.06390277382357e-17	2.83027913457399e-17	3.03950887676808e-17	5.63905611706478e-17	4.88011548955418e-17	3.80430689018639e-17	4.94545899906546e-17	4.62069383710424e-17	5.7840638296281e-17	3.88603632860268e-17	2.61969472074044e-17	5.17745658636974e-17
2008034	10	5.14940262518043e-17	5.65540247166577e-17	4.06953428264344e-17	5.54652514386595e-17	5.14897736003119e-17	5.60857580507522e-17	3.31356588587302e-17	5.3565937685041e-17	3.00286420958511e-17	3.24661065888641e-17	5.67299117681073e-17	4.78517981889221e-17	3.56485010613458e-17	4.90746147498487e-17	4.63904908018546e-17	5.9150446633637e-17	4.05823596559063e-17	2.70843331152355e-17	5.17537110115129e-17
2008034	11	5.53386210262685e-17	5.5509152137277e-17	3.70038248019926e-17	5.60080756459423e-17	5.30579533349046e-17	5.48711833603258e-17	3.60737466930994e-17	5.50407240918876e-17	3.20825040426802e-17	3.56372916239934e-17	5.80760645026806e-17	4.7789775754467e-17	2.81908958131173e-17	4.8545075709814e-17	4.69930029323969e-17	5.75571746976797e-17	4.27379126849396e-17	2.78738464057274e-17	5.00895451692901e-17
2008034	12	5.87530240552969e-17	5.49975544484866e-17	3.26610924887798e-17	5.59130185157439e-17	5.54807530525964e-17	5.2127086525234e-17	3.8818376496101e-17	5.46473148070326e-17	3.48142343978325e-17	3.91423080104034e-17	5.9405161247554e-17	4.72063071057077e-17	2.4947532584476e-17	4.77628315920768e-17	4.70281363683235e-17	5.49941469569412e-17	4.52289507619443e-17	2.89717697165644e-17	4.73945601925397e-17
2008034	13	6.03952709925722e-17	5.29678363706921e-17	3.05955337718428e-17	5.48224293522891e-17	5.6194152158612e-17	5.00160828501819e-17	4.12303244383096e-17	5.56967442182646e-17	3.7822027838788e-17	4.2365698666155e-17	5.96753580708256e-17	4.59784640978585e-17	2.59038353623069e-17	4.65154706106209e-17	4.72943361982726e-17	5.27577587967859e-17	4.72240563929264e-17	3.10063937802759e-17	4.46475678325138e-17
2008034	14	5.98898716724905e-17	5.15729340556503e-17	2.88902668321009e-17	5.20271244914538e-17	5.54218211078664e-17	4.85944964540754e-17	4.3542991915421e-17	5.63567107367755e-17	4.11707490465967e-17	4.50587213997663e-17	5.99049338132447e-17	4.54060611979709e-17	2.64376172796117e-17	4.99834719141353e-17	4.78786839469811e-17	5.08098788114306e-17	4.78369239549612e-17	3.35522073470903e-17	4.21683895632191e-17
2008034	15	5.72610329477138e-17	5.11310094661861e-17	2.7499790373613e-17	5.01417665154569e-17	5.42027409683372e-17	4.69616972289717e-17	4.5273722859452e-17	5.55452126614025e-17	4.48326038835592e-17	4.67595521185103e-17	5.86913225600219e-17	4.56109969097762e-17	2.72215743258042e-17	4.73948753406723e-17	4.78828582994994e-17	4.68700834322964e-17	4.7004238746414e-17	3.62381975529795e-17	3.95357394602101e-17
2008034	16	5.24984868456851e-17	4.96869336564843e-17	2.64190296422677e-17	4.84247578949258e-17	5.30349850284721e-17	4.52184644380327e-17	4.64909014711231e-17	5.37120153377687e-17	4.77393923237682e-17	4.72819984842144e-17	5.68761262605439e-17	4.68290464558585e-17	2.93556337983012e-17	4.51584495374676e-17	4.75503741146714e-17	4.31825768998663e-17	4.57915593493289e-17	3.9578728860785e-17	3.71751058497885e-17
2008034	17	4.82475954069236e-17	4.70789176853434e-17	2.55244038737414e-17	4.65487300856044e-17	4.99945940344467e-17	4.32892987016077e-17	4.67684884412249e-17	5.18501098350844e-17	4.82532354705436e-17	4.67731939556006e-17	5.33076408538233e-17	4.73538382582052e-17	3.20854221320396e-17	4.38933429023195e-17	4.74825453100267e-17	4.01088584624422e-17	4.49566140819285e-17	4.3177511765406e-17	3.50269987674232e-17
2008034	18	4.57390625063162e-17	4.49904372100185e-17	2.48107946670356e-17	4.52725606333798e-17	4.79920175829288e-17	4.13522498591697e-17	4.57792071013758e-17	5.00868974300166e-17	4.87448342738723e-17	4.48852418795848e-17	4.8918437702973e-17	4.81997617354378e-17	3.48685706327932e-17	4.2925452708532e-17	4.65140330285084e-17	3.73850147839131e-17	4.41220601597361e-17	4.55341692187588e-17	3.27324311821607e-17
2008034	19	4.43239309719583e-17	4.31581841009912e-17	2.41760108550257e-17	4.44568751077815e-17	4.66630229403969e-17	3.95718294978482e-17	4.47860232923714e-17	4.86995341135437e-17	4.85804229823766e-17	4.33255892812704e-17	4.25464464170189e-17	4.92739381388668e-17	3.69319969675034e-17	4.20532128993192e-17	4.62721674525545e-17	3.50795418697563e-17	4.40071192707196e-17	4.62538142164937e-17	3.03059809356133e-17
2008034	20	4.32745304768815e-17	4.19471793030026e-17	2.38154785735027e-17	4.32728391946684e-17	4.53243964840646e-17	3.85089136450236e-17	4.39221437808116e-17	4.71587215997581e-17	4.92035079078206e-17	4.24463478189209e-17	3.57766418109022e-17	5.01770436224573e-17	3.91046318107273e-17	4.1064137336026e-17	4.74680286513513e-17	3.39093154816746e-17	4.54430915232185e-17	4.62433860724139e-17	2.76103525990371e-17
2008034	21	4.16965034615082e-17	4.08128344889114e-17	2.36953274169441e-17	4.20943696827095e-17	4.43261082900541e-17	3.75416791232608e-17	4.31891475484165e-17	4.51483961554025e-17	4.76527495944366e-17	4.19839234313499e-17	3.00532390493378e-17	5.03179914632306e-17	3.8649615706621e-17	3.99910673250229e-17	4.99991683052122e-17	3.45004020149273e-17	4.6414242048372e-17	4.7479998019597e-17	2.43541672364182e-17
2008034	22	3.90941916047568e-17	3.97494262881926e-17	2.36904298847612e-17	4.1265514306795e-17	4.37544315230667e-17	3.65997174873006e-17	4.24421729788937e-17	4.29268111518292e-17	4.61514606624078e-17	4.14610199292809e-17	2.59607693041705e-17	5.24650368814894e-17	3.84025522041592e-17	3.88142363123072e-17	5.27131054831403e-17	3.57868839290435e-17	4.65579697649718e-17	4.6768056187016e-17	2.12182607702403e-17
2008034	23	3.68837829458347e-17	3.88719261831575e-17	2.34852118330231e-17	4.06237581156828e-17	4.32450542126105e-17	3.57054197100967e-17	4.17022827968541e-17	4.14435594951567e-17	4.55648524562418e-17	4.05073009949675e-17	2.3947442543223e-17	5.30148819720848e-17	3.81516644641802e-17	3.74355422194116e-17	5.35086057456895e-17	3.68775659494774e-17	4.67126093495807e-17	4.50790940687519e-17	1.87544772137779e-17
2008035	0	3.50552031851755e-17	3.81833741999659e-17	2.34459030262972e-17	3.98566707922507e-17	4.22188808337677e-17	3.48576935580696e-17	4.06637138861619e-17	4.01794709416804e-17	4.47415716163474e-17	3.91614307076075e-17	2.39946058659334e-17	5.25432601624658e-17	3.80135833378749e-17	3.57150564707683e-17	5.27217468702783e-17	3.75714895311307e-17	4.76147653125678e-17	4.39490392384027e-17	1.70590299851435e-17
2008035	1	3.32026310132915e-17	3.75653779264764e-17	2.38594449391179e-17	3.89466315903477e-17	4.11305252995692e-17	3.40644610503683e-17	3.91881228173467e-17	3.89164603469803e-17	4.35917749986905e-17	3.76501671003894e-17	2.49766409201262e-17	5.13042239615394e-17	3.78411287901611e-17	3.39852652619247e-17	5.14095062500987e-17	3.70854426111403e-17	4.72272395359599e-17	4.30582337067201e-17	1.58703712885684e-17
2008035	2	3.10004936959628e-17	3.70242533833217e-17	2.4605695231106e-17	3.79557539911295e-17	4.00312080728132e-17	3.33754918706654e-17	3.7532830021955e-17	3.76774215385202e-17	4.22201152051697e-17	3.59317397642959e-17	2.64201872526711e-17	4.72951413264706e-17	3.75344052113086e-17	3.29752727314068e-17	4.93562742689843e-17	3.71335570910325e-17	4.71600166163685e-17	4.22503602206036e-17	1.48770046033625e-17
2008035	3	2.81765641911311e-17	3.65494349232794e-17	2.56403833788141e-17	3.69873610933705e-17	3.9021171133797e-17	3.28872163638475e-17	3.53803441700389e-17	3.64207663284418e-17	4.0757025113437e-17	3.44615020861103e-17	2.88663832672491e-17	4.04302397662541e-17	3.7207937286971e-17	3.28012991238992e-17	4.68030209991461e-17	3.73745798741006e-17	4.67969114823375e-17	4.12572697413933e-17	1.33833424159381e-17
2008035	4	2.4871773052099e-17	3.61725805364109e-17	2.71180776453061e-17	3.6037105231057e-17	3.8065147771813e-17	3.26199228651991e-17	3.34617457074168e-17	3.57088855142535e-17	3.92379642514827e-17	3.30421003830943e-17	3.25077940023226e-17	3.35974540578074e-17	3.65721818456015e-17	3.30565654688209e-17	4.35049634944824e-17	3.75673184649136e-17	4.59447682573671e-17	4.01238483984797e-17	1.14660623779638e-17
2008035	5	2.21065250819135e-17	3.590842613469e-17	2.80702434883864e-17	3.51898490644688e-17	3.73241834693484e-17	3.2581111430392e-17	3.19561274920991e-17	3.51668115797439e-17	3.78559277049776e-17	3.15514873004126e-17	3.5723351027161e-17	2.81022168589189e-17	3.5556573614319e-17	3.39088449797451e-17	4.08391388730469e-17	3.71518340577035e-17	4.5114964473216e-17	3.89564125407564e-17	9.70619336582217e-18
2008035	6	2.04749910307189e-17	3.57191876556111e-17	2.85625829932664e-17	3.4514958330728e-17	3.68065143543349e-17	3.27657988159577e-17	3.08124349786764e-17	3.47527747192708e-17	3.66749957463163e-17	2.96350213164345e-17	3.7279006617929e-17	2.46910430574717e-17	3.44477357843308e-17	3.55412971102268e-17	3.89927690788604e-17	3.65359610022268e-17	4.42809133522883e-17	3.77808287770017e-17	8.07192735494748e-18
2008035	7	1.94388179505264e-17	3.53198260207246e-17	2.75245785947152e-17	3.39583017072945e-17	3.65606989668205e-17	3.31029100233074e-17	3.02850790599105e-17	3.41535427409047e-17	3.55876640919366e-17	2.77374466007522e-17	3.84523978050292e-17	2.37841170966667e-17	3.31606476707898e-17	3.60445000600825e-17	3.77537355331382e-17	3.59258228848127e-17	4.32268704426773e-17	3.6755917262655e-17	6.98952867461675e-18
2008035	8	1.85571254596646e-17	3.51464930583876e-17	2.61238410536776e-17	3.3735271814934e-17	3.65805275222478e-17	3.36419183981686e-17	3.01937384359415e-17	3.3739616731779e-17	3.47593595099891e-17	2.64012212287466e-17	3.96803128221117e-17	2.40713215336064e-17	3.1801369045859e-17	3.56747425139238e-17	3.58254721421498e-17	3.59743171953131e-17	4.19919919486469e-17	3.60987610820581e-17	6.60102837402729e-18
2008035	9	1.76583167820648e-17	3.46491495043879e-17	2.44537350530597e-17	3.57852270825072e-17	3.67680957735283e-17	3.68423080926219e-17	2.9911310645269e-17	3.34744835139247e-17	3.4150614890903e-17	2.49948078767968e-17	4.06477061736079e-17	2.48420256448906e-17	3.03745973914104e-17	3.54476589933774e-17	3.48060768516941e-17	3.69200143166924e-17	4.08494386302765e-17	3.5130142213668e-17	6.59802137526065e-18
2008035	10	1.68194180246364e-17	3.38982223219284e-17	1.91911371808713e-17	3.73047376152584e-17	3.6586022972343e-17	3.76060597440049e-17	2.95133001718487e-17	3.32592784305235e-17	3.36795642527989e-17	2.35039396533632e-17	4.21185912143828e-17	2.6183322184119e-17	2.89988563747225e-17	3.68261507603093e-17	3.43976341383067e-17	3.8261719952198e-17	4.02940125306046e-17	3.45131042915918e-17	6.98910436052714e-18
2008035	11	1.60632202598101e-17	3.30599218248524e-17	1.86202344964727e-17	3.725649686929e-17	3.61624801218355e-17	3.72475757965552e-17	2.92683272526919e-17	3.29104618428532e-17	3.32871641546563e-17	2.25831530988316e-17	4.40346518088609e-17	2.77341316975008e-17	2.7656232864906e-17	3.68317307941996e-17	3.42234510096006e-17	3.91846926667657e-17	4.01235384878956e-17	3.39926866084595e-17	1.09932517393678e-17
2008035	12	1.57669557199296e-17	3.22687652157677e-17	2.20445491154008e-17	3.70685889341711e-17	3.60402103132513e-17	3.65054756981394e-17	2.89711724894688e-17	3.22531267675564e-17	3.31055621069516e-17	2.19268839015455e-17	4.57227722641527e-17	2.92398755034657e-17	2.66091965568588e-17	3.65378694977965e-17	3.42350608206734e-17	3.84999676198336e-17	3.99906663557754e-17	3.35870388095588e-17	2.4381807792708e-17
2008035	13	1.63337555963998e-17	3.12802747591014e-17	2.6802947004991e-17	3.6761699265779e-17	3.63399734490704e-17	3.5501469856898e-17	2.81263899684606e-17	3.15481126586193e-17	3.31282807882076e-17	2.12272062832115e-17	4.69896911769346e-17	3.04139486177398e-17	2.6002254320376e-17	3.61531937278317e-17	3.36111548027322e-17	3.66904299541802e-17	3.97872654168961e-17	3.34771307147492e-17	4.60688713950602e-17
2008035	14	1.68085643584069e-17	2.97880463751823e-17	3.3725760176836e-17	3.62765003265789e-17	3.68009935894217e-17	3.44255673976012e-17	2.72573451529484e-17	3.10741318386505e-17	3.31954168584221e-17	2.04795052866652e-17	4.80302963523176e-17	3.14978467910275e-17	2.56715624784947e-17	3.5554914092921e-17	3.42924380139662e-17	3.53945985448075e-17	3.98172289054135e-17	3.35503467990189e-17	5.30686049492964e-17
2008035	15	1.61571458677337e-17	2.82654461352482e-17	4.73407395026422e-17	3.5743023985706e-17	3.7081581665268e-17	3.272723816896e-17	2.67780749725821e-17	3.05244625889159e-17	3.32780953268167e-17	2.00324530911892e-17	4.83344747100711e-17	3.30485807603585e-17	2.54740887396689e-17	3.49481574270905e-17	3.56218065546298e-17	3.49185978226215e-17	4.06205484969885e-17	3.3643743512673e-17	1.07347302311052e-16
2008035	16	1.40330229972862e-17	2.4790465040776e-17	5.99100329598104e-17	3.52622717383004e-17	3.6655974206721e-17	3.12500758152286e-17	2.65478441923408e-17	2.98648506172589e-17	3.34515105803257e-17	2.0214530452614e-17	4.77156300693418e-17	3.50844958518393e-17	2.54598835325594e-17	3.43624764579612e-17	3.09338245348453e-17	3.31796105945907e-17	4.19240411928119e-17	3.37065358162884e-17	1.07642378140314e-16
2008035	17	1.22366942857023e-17	2.03133921077141e-17	6.00423207222411e-17	3.45846574327336e-17	3.55139815277423e-17	2.98781521725335e-17	2.64106684558845e-17	2.86303091231129e-17	3.35749146236958e-17	2.01246341691133e-17	4.68921336102091e-17	3.75606078277964e-17	2.51728497720125e-17	3.38489619450961e-17	2.89434853095104e-17	2.61984004806605e-17	4.3970686973182e-17	3.36918675396202e-17	1.08985801327501e-16
2008035	18	1.7858678239736e-17	1.8478650606137e-17	6.57116919411365e-17	3.41613857286224e-17	3.43529270414963e-17	2.74878433209485e-17	2.59253359412418e-17	2.54318961889345e-17	3.35266797483229e-17	1.84234387931997e-17	4.61307672951427e-17	4.05594999711207e-17	2.45035729562442e-17	3.35346977714552e-17	2.89306571464184e-17	1.94182368737702e-17	4.50089023446481e-17	3.35863743688522e-17	1.09834880568013e-16
2008035	19	3.79174714578349e-17	1.93928106615109e-17	7.10468810944355e-17	3.35952276192132e-17	3.36638693982237e-17	2.54122094263947e-17	2.41358334151508e-17	2.06275112330178e-17	3.32499791575186e-17	1.54690298522686e-17	4.549099007547e-17	4.35892053355046e-17	2.34292600721112e-17	3.31936889501455e-17	3.1680335108756e-17	2.16142222994559e-17	4.52681314982443e-17	3.33889046375099e-17	1.09762401147303e-16
2008035	20	6.01579373634693e-17	2.14245506082853e-17	7.37252985672874e-17	3.11766316431287e-17	3.25023334451712e-17	2.34954233836979e-17	2.0646533185372e-17	1.75904956571634e-17	3.26820056278813e-17	1.43878719955574e-17	4.49589604100615e-17	4.55962209631718e-17	2.30419018156551e-17	3.29716860386073e-17	3.74737030453318e-17	2.3873220503266e-17	4.36648948199785e-17	3.30760573095953e-17	1.01607650000744e-16
2008035	21	7.86936866160858e-17	2.28140691553626e-17	7.3355838660669e-17	2.5186337483154e-17	2.82545204333802e-17	2.21071091120026e-17	1.74691776921817e-17	1.84645269624927e-17	3.17515389362976e-17	1.76792293284414e-17	4.38948346178017e-17	4.66084214005876e-17	2.1633080403925e-17	3.29320564306607e-17	4.04914177217503e-17	2.59360619542645e-17	4.30383503694441e-17	3.27883791716123e-17	8.19119441341198e-17
2008035	22	9.16627070801472e-17	2.52889841441024e-17	7.06057588895833e-17	2.33195574569728e-17	2.30540326860589e-17	2.22577700720536e-17	1.82352259287969e-17	2.81902002473968e-17	2.963059295743e-17	3.27660023538744e-17	4.24256049195531e-17	4.7151445900471e-17	1.93241787542865e-17	3.30735054392117e-17	3.9214623422538e-17	2.79382335909091e-17	4.25334228807767e-17	3.20721314006863e-17	7.89915640926596e-17
2008035	23	1.02254950411723e-16	3.02271234234762e-17	6.62889943215503e-17	2.31242924721167e-17	2.21170290741841e-17	2.42711087714511e-17	2.0235532348659e-17	4.17017862529195e-17	2.35553932278109e-17	5.01203207149169e-17	4.0490746010126e-17	4.71301393828231e-17	1.67012694361358e-17	3.32676522322694e-17	3.02755220664445e-17	3.05154280558536e-17	4.20569373202752e-17	2.9482607927593e-17	7.636013516186e-17
2008036	0	1.21746407403922e-16	3.58360570842152e-17	6.12535022842136e-17	2.29707478522079e-17	2.54599098506543e-17	2.74236375066102e-17	2.86781810555623e-17	5.17741313063509e-17	2.01111332632685e-17	6.88698470419132e-17	3.83892678900963e-17	4.62137777115642e-17	1.61580495202104e-17	3.33974514835414e-17	2.40023317834356e-17	3.0466483738096e-17	4.16640573138767e-17	2.22577975131302e-17	7.29163697682597e-17
2008036	1	1.23381814754109e-16	4.09632816962979e-17	6.04551184080909e-17	2.49418820992848e-17	3.12806239145539e-17	3.12326104089793e-17	4.14418514939434e-17	5.91967231907554e-17	2.66388790587566e-17	7.83637562120544e-17	3.66621501837073e-17	4.48507774862485e-17	2.15778142113597e-17	3.34227939755709e-17	2.26364190312495e-17	2.98044634607459e-17	4.13165372873588e-17	1.72908146984666e-17	6.87818901841672e-17
2008036	2	1.2047814460255e-16	4.51618039574939e-17	6.05137495877651e-17	2.95138423856929e-17	3.89062536699075e-17	3.56746384822351e-17	5.23305318202592e-17	6.63495742066872e-17	4.10605080892322e-17	8.20449388132716e-17	3.54606087977908e-17	4.34557767179278e-17	2.84637774682051e-17	3.33959662902634e-17	2.13457635877507e-17	3.08249320240914e-17	4.04188008949083e-17	2.38719274328152e-17	6.53609654536052e-17
2008036	3	6.20300166727177e-17	5.12866396651462e-17	5.85392181557763e-17	3.4034354761085e-17	4.77708999151175e-17	4.27255222777226e-17	5.79215412451103e-17	7.15540171667943e-17	5.80709496471342e-17	8.6357595606467e-17	3.47560622315836e-17	4.20178239014684e-17	3.79697514157316e-17	3.33243173978334e-17	2.0590675299302e-17	3.21115625331887e-17	3.85114990167042e-17	4.01189151914768e-17	6.36774550277857e-17
2008036	4	6.79158005982122e-17	5.57948270759713e-17	5.96163606980176e-17	3.67617900519748e-17	5.49660544408571e-17	4.83248788495697e-17	6.29886057120762e-17	7.09108244440508e-17	6.96025232008875e-17	9.22079604043063e-17	3.50722728400808e-17	4.07547450059476e-17	4.99118674009738e-17	3.31880558389811e-17	2.10530821671134e-17	3.40678553156966e-17	3.57319518852323e-17	5.811541927212e-17	6.14739381324615e-17
2008036	5	6.57236576054684e-17	5.32869530610178e-17	5.96472515895112e-17	4.03374693804035e-17	5.91040674260041e-17	4.91078802598293e-17	6.90262685767359e-17	6.70970370805347e-17	7.40151370268503e-17	8.291362602202e-17	3.60465172520442e-17	3.95674893113418e-17	5.47002276851573e-17	3.2988363313808e-17	2.18191549367965e-17	3.7307742690691e-17	3.21744739239344e-17	6.9107422862722e-17	5.97627015978966e-17
2008036	6	6.36005596996797e-17	5.15079404501983e-17	5.91159376115734e-17	5.44481602762443e-17	5.96329305869527e-17	4.98634175832933e-17	6.89314764112513e-17	6.28404169258381e-17	7.91807955569653e-17	6.1590553529513e-17	3.60909053346698e-17	3.84617358906107e-17	5.78728518607981e-17	3.26700511086513e-17	2.29054694206802e-17	3.97100952990607e-17	2.91458046515851e-17	7.68404174831137e-17	5.51506299016384e-17
2008036	7	6.23820993404178e-17	5.2132403983761e-17	6.01553342890401e-17	5.44576114824872e-17	5.80461910713829e-17	5.01033071648501e-17	6.02863140051583e-17	5.93067503677523e-17	8.08291533784443e-17	5.22728272621574e-17	2.880634982342e-17	3.79205305881935e-17	6.62506264250172e-17	3.21963321736749e-17	2.5760016381592e-17	4.13046591399497e-17	2.8786204558928e-17	7.99288564867275e-17	3.5173242424975e-17
2008036	8	6.25085661559179e-17	5.42162855369755e-17	6.24839796334148e-17	5.33784321376025e-17	5.42564831709576e-17	5.1251163610156e-17	5.38241652741895e-17	5.55308338692466e-17	7.36648669004506e-17	4.80800977284874e-17	2.53954997325711e-17	3.71462665928412e-17	6.54031486549047e-17	3.15717423356982e-17	2.95904012135147e-17	4.5232952302914e-17	3.17007636129899e-17	8.0247324396699e-17	5.7553359661805e-17
2008036	9	6.26893575097037e-17	5.72469515881192e-17	6.47869037984263e-17	5.05083603674159e-17	5.09818852784977e-17	5.17221615716358e-17	5.41958071907287e-17	5.09779644717042e-17	6.64892248461127e-17	5.14412125671985e-17	2.26076870709912e-17	3.64714084230969e-17	6.55654371332566e-17	3.07984344145685e-17	3.27080487858864e-17	4.66312426427501e-17	3.69236743742133e-17	7.61386805006235e-17	4.97976830350671e-17
2008036	10	6.17165693126879e-17	6.02575633471014e-17	6.56623601807444e-17	4.88569408273532e-17	4.88867903243847e-17	5.252640844986e-17	5.17347297358424e-17	5.00727841064421e-17	6.08585810113969e-17	5.40713019008651e-17	1.94256591381106e-17	3.59832288150288e-17	6.09756636514714e-17	3.04133028419832e-17	3.06410845832713e-17	4.75128240069503e-17	4.32157409505512e-17	6.8401821907829e-17	1.64875895885791e-17
2008036	11	4.06142163331056e-17	6.10070909512467e-17	6.52511976220381e-17	4.9309569751966e-17	4.91073447748955e-17	5.56317783019783e-17	4.8738220881975e-17	5.0966773169755e-17	5.68018325604817e-17	5.39423707852186e-17	1.93773243485046e-17	3.55676760228856e-17	5.13368106744298e-17	3.51030614108165e-17	2.94980172983004e-17	4.73031612472397e-17	4.9852817582108e-17	6.26087374553641e-17	2.04097254816475e-17
2008036	12	1.60112684815124e-17	5.84399920829767e-17	6.18677262131482e-17	5.18050089134426e-17	4.81478339627401e-17	5.43765979205086e-17	4.83277611592383e-17	5.39258096212005e-17	5.3905510905349e-17	4.78945505324878e-17	2.30092952879406e-17	3.48426944526569e-17	4.78861014009817e-17	4.69079598429285e-17	2.97828575760543e-17	4.76034987548835e-17	5.23509082080915e-17	5.79253631077272e-17	4.06277387492868e-17
2008036	13	2.15877846834879e-17	5.21421063642607e-17	5.70825750532297e-17	5.23201462477434e-17	4.96949660200971e-17	5.32684657098908e-17	4.93716432934806e-17	5.44151983252533e-17	5.0565025516105e-17	3.52912888006813e-17	2.7242903825187e-17	3.37939717158249e-17	4.66638047000517e-17	5.86385097429282e-17	3.10498372681671e-17	4.76682197030152e-17	5.20866110317716e-17	5.43754523528603e-17	1.06860759046407e-16
2008036	14	4.40975601975366e-17	4.35422770623736e-17	4.81711828281035e-17	5.16943925509144e-17	5.13661484790395e-17	5.23699818947303e-17	3.60943924052706e-17	4.93802336698663e-17	4.87715293391856e-17	1.83929559929251e-17	2.96404152603764e-17	3.26090228037995e-17	4.52849493721718e-17	5.99953532214047e-17	3.23879337148936e-17	4.62693380087209e-17	5.16943545218501e-17	5.03335297259468e-17	1.06881912736631e-16
2008036	15	5.58531743843573e-17	2.76730554885243e-17	3.68235955112957e-17	5.02231630915964e-17	5.13342479616127e-17	5.12971010159367e-17	1.97871273252465e-17	3.65960215786017e-17	4.81848350565516e-17	9.44136696393451e-18	3.06649173526164e-17	3.15161264713879e-17	4.19876512058343e-17	5.86036746579129e-17	3.32826276191914e-17	4.64635895943312e-17	5.14207252943732e-17	4.80400363400082e-17	1.06908295513789e-16
2008036	16	6.49596549447267e-17	2.56616597559334e-17	2.97865289717949e-17	4.73040089693834e-17	4.85675857866018e-17	4.92604458440434e-17	9.9837352534726e-18	1.77736644259106e-17	4.83465854764721e-17	1.20394083586343e-17	3.09039017841749e-17	3.0533609469613e-17	3.56222548604979e-17	5.61830950953137e-17	3.42549637872862e-17	4.60470920285005e-17	5.08436483944775e-17	4.66708228285242e-17	1.06515456323228e-16
2008036	17	9.33655934559414e-17	2.46380980260317e-17	2.62826382653779e-17	3.86810398337046e-17	4.18554602851777e-17	4.51990744708758e-17	7.38979757666121e-18	1.41775159430385e-17	4.42153158731528e-17	1.64739651516887e-17	3.07894310729559e-17	2.94955804349311e-17	2.8979093595215e-17	5.23427822230811e-17	3.47823971287774e-17	4.57539230051557e-17	4.8238171361889e-17	4.59014654461431e-17	1.07712937321257e-16
2008036	18	1.08052077064842e-16	1.91678497995034e-17	2.41915233940861e-17	3.44952522325532e-17	2.50818236200977e-17	3.71098496813306e-17	1.1093648788179e-17	2.82932092403024e-17	3.92506982229354e-17	3.07015111039337e-17	3.04950001367184e-17	2.853548131685e-17	2.01552895623168e-17	4.95409205742876e-17	3.54038825289134e-17	4.74546127817065e-17	4.57399450066119e-17	4.07183440143719e-17	1.06121703681205e-16
2008036	19	1.07919941924649e-16	1.59292703385338e-17	2.21298483172643e-17	3.07680617306057e-17	2.09252470824115e-17	2.59528608713741e-17	1.09951918866149e-17	3.50381132109317e-17	3.7581153163947e-17	1.07411855478649e-16	3.05550478587432e-17	2.7685774752247e-17	1.38931197239578e-17	4.81817648555721e-17	3.51540735073656e-17	4.94467301104593e-17	4.4560690237324e-17	3.68210549670274e-17	9.68570381201452e-17
2008036	20	9.03478225356924e-17	1.79622769015794e-17	2.07350584708345e-17	2.07413467061182e-17	2.14291364406923e-17	1.80675307289639e-17	2.46828307108447e-17	3.89813003206866e-17	1.44845721525987e-17	1.0683034541625e-16	3.08314207692252e-17	2.69996472379924e-17	1.30096880312511e-17	4.69194343921665e-17	3.47678564936929e-17	5.2197824726008e-17	4.35599032982181e-17	2.67839105512415e-17	1.05822448637352e-16
2008036	21	8.02481790556244e-17	2.34425457083664e-17	2.00304756381952e-17	1.48623773406332e-17	2.13946083148218e-17	1.70207160700463e-17	4.53762413020607e-17	4.36808348456174e-17	2.22955879810765e-17	1.06331539345253e-16	3.12794965692927e-17	2.64415255438873e-17	1.80194462719881e-17	4.64174709164851e-17	3.43934379254614e-17	5.13674898554549e-17	4.35193483727775e-17	1.4555238012851e-17	1.05734693057247e-16
2008036	22	1.07684564499074e-16	2.60004236334356e-17	2.0312568517102e-17	1.32186595348643e-17	2.06154659239485e-17	1.95863078767245e-17	5.57623449920248e-17	4.96927481380167e-17	4.68866841025293e-17	9.0232627787903e-17	3.22812684775187e-17	2.60585092370293e-17	2.14467140088904e-17	4.6224985090572e-17	3.44685508456362e-17	4.90894727200397e-17	4.38708663277822e-17	1.91363013557671e-17	1.01134506857811e-16
2008036	23	1.08596071419675e-16	2.22752514125317e-17	2.16925018587311e-17	1.33701638581692e-17	2.03750450794025e-17	1.58961032284566e-17	5.7008796177846e-17	5.68000763009003e-17	6.18607996706363e-17	6.57307422613201e-17	3.54344002970506e-17	2.57833739076414e-17	1.51724017846681e-17	4.42719508468749e-17	3.59740482591526e-17	4.62236211105084e-17	4.20061258505051e-17	4.05658751727674e-17	9.26596110020565e-17
2008037	0	9.55531915770991e-17	5.59537630574599e-18	2.30347831432547e-17	1.47769175942723e-17	2.01889858277403e-17	5.18408058532895e-18	5.52256773745893e-17	5.94830057904197e-17	6.57728580496396e-17	1.06547362617594e-16	3.87716428037033e-17	2.5607713493645e-17	1.54287696970454e-17	4.1843462812617e-17	3.6764014424452e-17	4.2178960534371e-17	3.95254725950338e-17	5.99693386835535e-17	1.06927643888881e-16
2008037	1	7.20956181064052e-17	1.28281232907312e-17	2.32977117055033e-17	1.35224343488942e-17	2.28172937090321e-17	1.29786882517681e-17	5.3269643074709e-17	5.44126633112527e-17	6.64152671903651e-17	1.06532844998026e-16	4.22086902740273e-17	2.54862726525162e-17	2.28097417452538e-17	3.97490513928547e-17	3.63887799467352e-17	3.47999969048847e-17	3.68457970460485e-17	6.79467477517792e-17	1.06715587620736e-16
2008037	2	8.40596761426616e-17	4.25486228569445e-17	1.47165163729818e-17	3.35424248790824e-18	2.61618044891002e-17	3.12385677897761e-17	5.10277296399253e-17	4.06189212677158e-17	6.59089481820077e-17	6.21862686256676e-17	4.64650495181663e-17	2.53698619229344e-17	3.45798508860905e-17	3.805692329294e-17	3.42090086447852e-17	2.35640826076205e-17	3.32929773791025e-17	6.77544612390936e-17	1.06897952330724e-16
2008037	3	8.47834013634421e-17	7.29289629986381e-17	9.53185584738282e-18	5.21770120061002e-18	2.40945674107768e-17	4.30392059010539e-17	4.9411381748797e-17	5.24326129270965e-17	5.18667014291745e-17	4.11120092136134e-17	5.00661612991218e-17	2.52438460961732e-17	3.6887205480981e-17	3.67394742368491e-17	3.21676250294492e-17	1.88551104065395e-17	2.96350531730978e-17	6.5103333551163e-17	1.07133225134098e-16
2008037	4	6.60536243303919e-17	1.08861191805808e-16	7.33804813478726e-18	1.35753536268187e-17	1.3791092101e-17	4.94664742239609e-17	4.70006307825808e-17	7.38398825119537e-17	3.03337818237424e-17	3.6947437769304e-17	5.15184244789292e-17	2.50973062365521e-17	3.09367344665991e-17	3.54502099621788e-17	3.07667781537266e-17	1.69589593222477e-17	2.67425994121432e-17	5.04549034436254e-17	8.05396410182879e-17
2008037	5	4.37645809627926e-17	8.63054855134217e-17	7.01395652504431e-18	2.93117852803984e-17	1.00455754462603e-17	6.10368821641797e-17	4.43034912948347e-17	8.97120552466699e-17	3.54006049509261e-17	3.26778833226736e-17	4.99028030159312e-17	2.49576611349942e-17	2.79752983380341e-17	3.41032835903004e-17	2.97456310718038e-17	1.49275016356038e-17	2.41862428178289e-17	3.07528666595461e-17	1.06764245543545e-19
2008037	6	3.12373531573547e-17	6.12236824567432e-17	8.18853622523667e-18	4.49906228237617e-17	3.84661317986507e-17	7.29772976578871e-17	4.15690833893111e-17	1.09949854809026e-16	4.52417103530935e-17	2.96014095232582e-17	4.73356981328684e-17	2.48628523678223e-17	2.51235266013639e-17	3.26978133299418e-17	2.94252354675301e-17	1.47774215021537e-17	1.9738585831924e-17	3.18883216835326e-17	4.09755413951022e-17
2008037	7	2.98005102916928e-17	2.68488842012191e-17	3.7690351131542e-17	5.42318944533048e-17	6.46116314372215e-17	8.81743347118375e-17	3.78040329202296e-17	1.05759209626712e-16	5.2040965168269e-17	3.3387280102636e-17	4.52225248187661e-17	2.48813955144592e-17	1.41406155003793e-17	3.14776894010398e-17	3.00854216125685e-17	1.49506931633325e-17	8.45686287065949e-18	4.21357412335077e-17	3.53372053885207e-17
2008037	8	3.27879947014896e-17	5.71562430583655e-17	6.24595777349707e-17	5.55851966722791e-17	7.67499629530517e-17	9.99803708059829e-17	3.30306404910774e-17	7.2419543578285e-17	5.5917982340926e-17	4.35008106020321e-17	4.40047835176321e-17	2.51152462975684e-17	1.65839808909628e-17	3.06547590383709e-17	3.16128535684892e-17	1.40895770258491e-17	5.93097733299078e-18	4.75065944143415e-17	3.42734265789227e-17
2008037	9	3.32186981854513e-17	1.05357356836479e-16	3.89837429983873e-17	2.20533115508496e-17	7.78837769018989e-17	7.35803027558819e-17	3.07386643246934e-17	4.74466387954144e-17	5.53372189806325e-17	4.93642274775597e-17	4.31041187944051e-17	2.55601645894528e-17	1.67495456954658e-17	3.0121534346782e-17	2.75244909690369e-17	1.21239888905741e-17	5.76107234966034e-18	4.80029249643276e-17	3.58601393485681e-17
2008037	10	3.99223452211134e-17	4.13036796090876e-17	1.06174759592037e-16	1.58943521815136e-17	6.88065099560179e-17	6.70667041189791e-17	3.52204954902308e-17	3.03256743624923e-17	5.08168347145168e-17	3.8933908625734e-17	4.36097710303605e-17	2.56036264900968e-17	1.80146226289323e-17	2.96767625477764e-17	3.20965803551601e-17	6.57034068470328e-18	6.82798397071473e-18	4.63556810058059e-17	3.86056561985666e-17
2008037	11	4.78977442774978e-17	1.4735959816281e-17	1.06393746083677e-16	1.97995530303368e-17	5.99342834470368e-17	5.14042800054613e-17	3.6913281154227e-17	2.57530334946431e-17	4.4929119432093e-17	3.17881152963336e-17	4.4104286936622e-17	2.75662471052646e-17	2.07704013067324e-17	2.9264059642915e-17	2.72953406835337e-17	7.08270352360085e-18	1.2304436423808e-17	4.41248838301756e-17	4.14843201337735e-17
2008037	12	5.24755027770827e-17	2.67266394244008e-17	1.06224599890131e-16	3.10555276386321e-17	4.26985361002534e-17	5.30428014222749e-17	2.88508226571562e-17	2.0532005318698e-17	3.81944088210208e-17	3.45533787728846e-17	4.22052970266956e-17	3.179785073126e-17	2.29407135796088e-17	2.8673005397602e-17	2.50227906535643e-17	1.16114238490902e-17	2.43660274082822e-17	4.12593209131334e-17	5.23081347619787e-17
2008037	13	6.18679239669089e-17	3.52136051929624e-17	1.0590602717246e-16	1.63748221903654e-17	2.81740187643902e-17	2.49029802498831e-17	2.82221321026441e-17	2.77233309476784e-17	3.41364927763586e-17	4.07543138324907e-17	3.62123051044465e-17	3.61858914371316e-17	2.55193708801955e-17	2.83439109985899e-17	2.39019526844839e-17	1.46987552173209e-17	3.5451509209749e-17	3.77220738956714e-17	6.56590337607947e-17
2008037	14	7.33452150872856e-17	4.52657293316315e-17	1.05517282936528e-16	2.3589848861641e-17	2.21883814899072e-17	1.84935665201549e-17	3.38093891793147e-17	3.62603726334264e-17	3.31333725846139e-17	4.71180184908828e-17	3.06890189355176e-17	3.97229540078401e-17	3.03382608000179e-17	2.8367811115567e-17	2.33921693332957e-17	1.95249138214062e-17	3.95347108356979e-17	3.537216403705e-17	6.54180381948953e-17
2008037	15	9.0753589336185e-17	6.42239298378418e-17	1.05219821609104e-16	3.11191760980806e-17	2.45033581772618e-17	2.25263311742223e-17	4.01916204527873e-17	4.40417715850608e-17	3.09107000616386e-17	5.46248457855904e-17	3.03087766437189e-17	4.20207528363769e-17	3.69035456684136e-17	2.88071697320527e-17	2.29005475425262e-17	3.02454080107881e-17	3.80236709307035e-17	3.41235243512087e-17	5.72743808676403e-17
2008037	16	1.08645973678951e-16	7.70693008310574e-17	1.05017282951825e-16	3.84329113961226e-17	3.08410546210173e-17	2.75127656007267e-17	4.38045495130978e-17	5.24636510222697e-17	3.02463775540117e-17	6.31364884613952e-17	3.16491865171372e-17	4.2664124508384e-17	3.97190377971095e-17	2.94931887083119e-17	2.1797978469122e-17	1.0767424014511e-17	3.50222223739227e-17	3.2970799467445e-17	9.52168187137178e-17
2008037	17	9.87423046360746e-17	1.07125859067689e-16	9.38099581712144e-17	4.85202299726456e-17	3.98207718591155e-17	3.99413603320363e-17	4.77697826636724e-17	6.76142385076558e-17	3.16149758867068e-17	5.57459722839742e-17	3.36592646677298e-17	4.23789435075178e-17	4.18202625648695e-17	3.04285532525578e-17	2.07572170769607e-17	9.08188832031e-18	3.17993555479132e-17	3.05394110799691e-17	6.15894389624313e-17
2008037	18	9.51767046541218e-17	1.07121181504802e-16	8.36929836327451e-17	5.60270175397419e-17	4.97980084072588e-17	5.27094782574352e-17	4.84337528429387e-17	8.98262287329467e-17	3.02927769912942e-17	5.59731018270401e-17	3.53979416281695e-17	4.20289239223763e-17	4.45574586285676e-17	3.15166966058858e-17	1.94835709820517e-17	1.28717641186704e-17	2.66503106206623e-17	2.46013529981753e-17	5.49184329789034e-17
2008037	19	7.06345324531404e-17	1.06985427534077e-16	8.07446394415564e-17	6.0714282645375e-17	6.11063503671888e-17	5.83585839576231e-17	4.92078285042733e-17	1.0737801869476e-16	3.15587084107652e-17	5.73745760065013e-17	3.67021155525349e-17	4.12783849477492e-17	4.6088406343523e-17	3.33199647956035e-17	1.81887366799222e-17	1.60734031894474e-17	1.99515383800569e-17	2.11637891989046e-17	5.53373070651761e-17
2008037	20	7.06978439316164e-17	1.07037869429542e-16	1.12786250203997e-16	6.47193635925303e-17	7.38431004646178e-17	1.06437162317849e-16	4.88377032128431e-17	1.07471829640733e-16	3.33095695183314e-17	5.78335272911631e-17	3.72914695386802e-17	4.00616798687359e-17	4.75828087949073e-17	3.57388076157568e-17	1.63195656809859e-17	2.52137316385899e-17	1.78731620858806e-17	2.05445764276953e-17	5.68216275032021e-17
2008037	21	8.81757150740732e-17	9.51415098443057e-17	1.1337739301543e-16	7.00846542268216e-17	7.24138700702851e-17	1.06220252027969e-16	4.89019260455965e-17	7.76222497393628e-17	3.45651290374033e-17	6.09745408411148e-17	3.7708630722775e-17	3.93326144744513e-17	5.05351689993567e-17	3.87935441300708e-17	1.54841961832138e-17	3.33287742485817e-17	1.7761619765708e-17	2.18979956820181e-17	5.83832645555835e-17
2008037	22	1.03246448012151e-16	1.07210966835287e-16	1.13747656177806e-16	1.06902917684948e-16	6.14009428412977e-17	1.06159952009268e-16	4.9683211417965e-17	6.00329092443717e-17	3.49977471300499e-17	6.5817928602653e-17	3.83119404383003e-17	3.92526786340013e-17	5.49030779291611e-17	4.2786144545092e-17	1.72521261305179e-17	3.73801137882656e-17	1.9569491166488e-17	2.52791382993112e-17	5.88217761876655e-17
2008037	23	7.96560076869888e-17	1.07009807781029e-16	1.13966730305746e-16	7.90992818951009e-17	5.26469606266304e-17	1.06362953018222e-16	5.13672731977341e-17	5.98798301414128e-17	3.51879453691769e-17	7.10974768616017e-17	3.91815108789606e-17	3.97351511890111e-17	6.13616177746863e-17	4.49602255092296e-17	1.82201267625124e-17	4.17008754250917e-17	2.22354628990276e-17	2.91302483685868e-17	5.63987364632307e-17
2008038	0	8.40216494133302e-17	1.06811463710255e-16	5.2270665369271e-17	7.00344385829734e-17	4.90250476743832e-17	1.06684807541604e-16	5.53043813923864e-17	5.86228780986238e-17	3.64420090403455e-17	7.56243141259515e-17	4.01106096442643e-17	3.99819233159578e-17	6.67535183913748e-17	4.57369394416052e-17	1.22100721797269e-17	4.61017798996649e-17	2.62350274325649e-17	3.33864980986481e-17	5.44961733092832e-17
2008038	1	8.56965771360907e-17	1.08658202992533e-16	4.74177912683538e-17	7.48737215880705e-17	4.70249937474301e-17	1.06852419583854e-16	6.09821403139677e-17	5.88135074765904e-17	3.92492238285032e-17	7.8949231946043e-17	4.09097902309464e-17	3.99597065637582e-17	6.82569463583961e-17	4.51337844025545e-17	7.2619122752639e-18	1.05606749224439e-16	2.88476820206755e-17	3.68959764760848e-17	5.31848567981837e-17
2008038	2	8.72552031644917e-17	1.07310656159244e-16	4.41780456247131e-17	7.72967829932548e-17	4.51225889205239e-17	1.06416959714609e-16	6.58481981708095e-17	6.04246306494219e-17	4.11642403743009e-17	7.99188248163964e-17	4.15067186552236e-17	3.97976707771148e-17	6.72164527411384e-17	4.69252349909545e-17	8.84723920018458e-18	1.06083769717941e-16	2.96962225136412e-17	3.92597145401462e-17	5.28236772339312e-17
2008038	3	8.91443418880751e-17	1.06605209487771e-16	4.16367895498458e-17	7.37433988505066e-17	4.41672895635477e-17	1.05855920221755e-16	6.83265840539174e-17	6.32027832004342e-17	4.29967080006572e-17	7.94381457921071e-17	4.18848441579839e-17	3.91110120046442e-17	6.4538827874398e-17	5.0849095004699e-17	1.17766400731424e-17	9.49104106237461e-17	2.87065788109448e-17	4.13291585899108e-17	5.2857760513316e-17
2008038	4	9.08567029613961e-17	1.06288795978359e-16	3.9955914046918e-17	6.82078894285808e-17	4.43284403007593e-17	9.51533884733361e-17	6.80250620137488e-17	6.56309659593023e-17	4.47797223869528e-17	7.79749528446284e-17	4.20919212825177e-17	3.78310561048346e-17	6.19496782182566e-17	5.31317039935021e-17	1.75595800727165e-17	1.06801565220247e-16	2.41789886150863e-17	4.12902762129697e-17	5.23018818029308e-17
2008038	5	9.63866008801011e-17	1.07031087099834e-16	3.91395520631268e-17	6.38960485351492e-17	4.50829652605634e-17	1.06505298579118e-16	6.5900133195019e-17	6.7754021546358e-17	4.44353902457043e-17	7.59620657399186e-17	4.22734565859591e-17	3.65687514780041e-17	6.02289222824393e-17	5.33697117021665e-17	2.32886234476632e-17	5.15832862927296e-17	1.81754059530964e-17	3.97788863956356e-17	5.21104696346579e-17
2008038	6	9.77018682970493e-17	1.07164676399939e-16	3.98125770324224e-17	6.08829721791704e-17	4.69860017263093e-17	8.73841696113259e-17	6.2925917367741e-17	6.88394911588367e-17	4.23485546655527e-17	7.27816415675838e-17	4.25190362764194e-17	3.57803280651574e-17	5.7159168907653e-17	5.17812512926528e-17	3.07952315103788e-17	5.73023372547149e-17	1.56093582453377e-17	3.83545184962122e-17	5.20257429219603e-17
2008038	7	1.0856244009999e-16	1.06684351489464e-16	3.98689812329949e-17	5.74076473137849e-17	4.92828055268883e-17	8.84000372113985e-17	5.99517496851848e-17	6.76903457073499e-17	4.01798086039738e-17	6.96436782111115e-17	4.29508858237632e-17	3.42061561581273e-17	5.49849369475458e-17	4.97178508989069e-17	3.92518271288508e-17	7.23723329943057e-17	1.73725718610715e-17	3.75377409636187e-17	5.29190290357089e-17
2008038	8	1.08896203951585e-16	8.25421348986953e-17	4.00244506561819e-17	5.69874557353982e-17	5.01181615607736e-17	8.11061753257663e-17	5.73226712566222e-17	6.50940627768541e-17	3.86601826175927e-17	6.71039060391889e-17	4.35723752711061e-17	3.19543376462513e-17	5.40046541681441e-17	4.76925043665091e-17	4.37058486200596e-17	6.10645010323032e-17	2.08922981058954e-17	3.69728772794977e-17	5.27891154441245e-17
2008038	9	9.31851314524812e-17	7.36611103798087e-17	4.16685393776227e-17	5.82622827204517e-17	4.91952174928115e-17	7.23953015260401e-17	5.55227571105949e-17	6.25997334473998e-17	3.76281513370514e-17	6.50597319190543e-17	4.41833512983874e-17	2.97475430393914e-17	5.35431740920234e-17	4.73939679540767e-17	4.56887214531308e-17	5.65605627966192e-17	2.25857860856145e-17	3.64812204169379e-17	5.21310195693914e-17
2008038	10	8.03841175186361e-17	6.75118164157803e-17	4.32293028613254e-17	5.88340580367627e-17	4.79328677382375e-17	6.72448756672317e-17	5.42359080206444e-17	6.04936906419724e-17	3.70436924316352e-17	6.33669628985782e-17	4.47418260669705e-17	2.82860498548928e-17	5.44071840015672e-17	4.71175445191037e-17	4.57617196059742e-17	5.30333872141389e-17	2.24066626738939e-17	3.59821411973007e-17	5.22331399586753e-17
2008038	11	7.19929772227067e-17	6.43869042525415e-17	5.23730612777816e-17	5.87102659112081e-17	4.66914255045929e-17	6.29247028971921e-17	5.36131788364105e-17	5.8770697374026e-17	3.63728658636274e-17	6.31805846418393e-17	4.53589601350537e-17	2.71617232998696e-17	5.62707403679102e-17	4.59530474405649e-17	4.52196352157307e-17	5.01583263701113e-17	2.11366481710887e-17	3.52225406884618e-17	5.27535473678046e-17
2008038	12	6.604783717287e-17	5.91493378397739e-17	5.52524901428201e-17	5.71784032721277e-17	4.59710046506418e-17	6.02919875883178e-17	5.28062307424642e-17	5.77881065728668e-17	3.6016319670441e-17	6.32426407012534e-17	4.62594549573978e-17	2.61728877312161e-17	6.12588573115288e-17	4.62625396883443e-17	4.45897216653774e-17	4.89352930011395e-17	1.95341593155135e-17	3.48401763747505e-17	5.19480299694245e-17
2008038	13	6.2070648291377e-17	5.58287583578629e-17	5.31412379801905e-17	5.64166526204244e-17	4.57363629086002e-17	5.81453652264066e-17	5.22386083102271e-17	5.84000334579215e-17	3.64809870291019e-17	6.35088026816955e-17	4.75595767706185e-17	2.53024007762755e-17	6.15441475772274e-17	4.45529051934093e-17	4.23702098012404e-17	4.86780681664611e-17	1.78631779909503e-17	3.52536478228227e-17	5.0876501505698e-17
2008038	14	5.95529896091164e-17	5.42059804891425e-17	5.18369349745182e-17	5.60901206184667e-17	4.60149702437297e-17	5.6331512689991e-17	5.22240695348288e-17	6.05787086190756e-17	3.75059102485932e-17	6.13490548187531e-17	4.90686829827256e-17	2.44648393664631e-17	6.75384582408693e-17	4.31071239293089e-17	3.94930013017204e-17	4.85254420689178e-17	1.58828621679443e-17	3.61171965146745e-17	4.86489413211799e-17
2008038	15	5.76664024583302e-17	5.35241949433395e-17	4.96615628206749e-17	5.55957977515242e-17	4.67130289102079e-17	5.49615886434157e-17	5.23261947779386e-17	6.13050584700034e-17	3.86605655404823e-17	5.84731581428522e-17	4.9833987209637e-17	2.36364760784493e-17	6.07895041769937e-17	4.26638110937817e-17	3.68508913295979e-17	4.82248225729519e-17	1.37182633160768e-17	3.69843573053925e-17	4.7002010321229e-17
2008038	16	5.51584375753319e-17	5.29478249135566e-17	4.74688091441568e-17	5.50675927232972e-17	4.69279226542313e-17	5.36254580993263e-17	5.28027178135882e-17	6.08195938518212e-17	3.96915735701132e-17	5.56094449835226e-17	5.00753014691736e-17	2.28787675940354e-17	5.77543427428238e-17	4.28113134219108e-17	3.45723566628068e-17	4.77059554177416e-17	1.20164362044968e-17	3.77037663429841e-17	4.5942888679103e-17
2008038	17	5.30425911539236e-17	5.20834884136869e-17	4.351285670521e-17	5.42756335893718e-17	4.76913497742178e-17	5.24649356214187e-17	5.34954886113103e-17	5.82377665478611e-17	4.03058232729743e-17	5.29471596704076e-17	4.98807187816493e-17	2.22655610749563e-17	5.82515760575846e-17	4.24468930955814e-17	3.28831456405137e-17	4.80612351203388e-17	1.1581085126757e-17	3.80041727915685e-17	4.49579904083883e-17
2008038	18	5.04365372039345e-17	5.30826104011561e-17	4.19927519415016e-17	5.13228871454854e-17	4.80075934679022e-17	5.18331063372939e-17	5.27246322892549e-17	5.52087033430928e-17	4.04537967200861e-17	5.05760655079262e-17	5.03504044157333e-17	2.17983056307055e-17	5.83439312928368e-17	4.48963424512314e-17	3.14700888616237e-17	4.69406745332711e-17	1.32983397485974e-17	3.81257406296372e-17	4.41442570484705e-17
2008038	19	4.82228493725397e-17	5.44447924718242e-17	4.09475871983332e-17	5.09084092212751e-17	4.72047223820964e-17	5.19465444933562e-17	5.10738837979832e-17	5.28903488400938e-17	4.08553529049996e-17	4.71370424477494e-17	5.19636080869504e-17	2.14218490635007e-17	5.34902259565406e-17	5.58469433819287e-17	3.01480031487466e-17	4.52451680606037e-17	1.71406812429467e-17	3.86754675873069e-17	4.3719549842165e-17
2008038	20	4.63701122298038e-17	5.54225095724422e-17	4.3795549562733e-17	5.05607176293684e-17	4.66677498337641e-17	5.26573556901448e-17	4.90558176346341e-17	5.1092050492287e-17	4.23860696552093e-17	4.04997238814131e-17	5.28019002048329e-17	2.11034353869699e-17	4.22116178755375e-17	6.64385629692315e-17	2.84186775508007e-17	4.36769824691755e-17	2.17965260671452e-17	4.06273223743414e-17	4.36933631505018e-17
2008038	21	4.49312117774766e-17	5.59902523577799e-17	4.4109450671641e-17	5.01557587615557e-17	4.66380797890532e-17	5.31750999341208e-17	4.60248877945056e-17	5.01427719980529e-17	4.59527756396408e-17	2.90539379082358e-17	5.25717543521104e-17	2.08904737803252e-17	2.61814887389171e-17	6.03034451080201e-17	2.56218997339717e-17	4.24917764469497e-17	2.61997212416581e-17	4.44019331267154e-17	4.40980233715235e-17
2008038	22	4.35843868055971e-17	5.65314928584574e-17	4.41656608770859e-17	4.97149280904016e-17	4.69371221183384e-17	5.43950385032825e-17	4.1567535439033e-17	4.91631222061022e-17	4.90025884529595e-17	2.31483744174293e-17	5.19738692136921e-17	2.08073898111977e-17	1.48083831197795e-17	5.5476067649392e-17	2.28229105780194e-17	4.14321265847393e-17	2.92754614035166e-17	4.90827992626314e-17	4.47839065441363e-17
2008038	23	4.2024910610559e-17	5.67069170060998e-17	4.41747199521586e-17	4.92468412820375e-17	4.73364370262508e-17	5.54700644587299e-17	3.65251540151446e-17	4.85739456430031e-17	4.93631383336965e-17	3.06681237729359e-17	4.96903192352724e-17	2.08468253746466e-17	1.22913255239532e-17	5.06862600626018e-17	2.07247140206648e-17	4.03438608336454e-17	3.08345132475836e-17	4.99361927398718e-17	4.56536630148762e-17
2008039	0	4.06019048196612e-17	5.66878511131257e-17	4.41526662861278e-17	4.88118526828786e-17	4.7474843236967e-17	5.62244991321874e-17	3.48116831375907e-17	4.81835256421634e-17	4.68735903239325e-17	3.81807026048459e-17	4.68185958175707e-17	2.09261260497637e-17	1.36527152671591e-17	4.82959770290565e-17	1.87988841053275e-17	3.9202998964911e-17	3.14891893100596e-17	4.67893496883542e-17	4.67133087820249e-17
2008039	1	4.07312217838852e-17	5.65242998815273e-17	4.47478937475677e-17	4.8692752165177e-17	4.73907494914571e-17	5.66623914740385e-17	3.59011546221376e-17	4.74688314832572e-17	4.46096360912919e-17	4.0718073337144e-17	4.32148201959115e-17	2.09193419455564e-17	1.66053303177168e-17	4.63604477367102e-17	1.70972358450696e-17	3.81426408926683e-17	3.22225187072766e-17	4.27204671712317e-17	4.75992730477065e-17
2008039	2	4.29157427260009e-17	5.62512029646264e-17	4.55670767981513e-17	4.9105134949956e-17	4.73343925559889e-17	5.67828399931839e-17	3.69851736460536e-17	4.64072316957327e-17	3.14810696783312e-17	4.29509169045207e-17	3.86122715971366e-17	2.11636379197575e-17	1.96082846619497e-17	4.46814199502822e-17	1.56909458661365e-17	3.73535395442303e-17	3.19211721471082e-17	3.84439343325334e-17	4.78438024000308e-17
2008039	3	4.64464670008448e-17	5.62153491168738e-17	4.64925918663385e-17	4.88992665248991e-17	4.73264672195414e-17	5.656484620173e-17	3.84312308871488e-17	4.50356283487545e-17	2.6090085387434e-17	4.23245998054028e-17	3.39814347304754e-17	2.18494870582732e-17	2.15592765929185e-17	4.35503239434336e-17	1.45605694897737e-17	3.69304328180026e-17	3.12565514967826e-17	3.28870373064197e-17	4.73668033732721e-17
2008039	4	4.9633385928632e-17	5.61873757218225e-17	4.74789135993824e-17	4.88647583050826e-17	4.73556249109946e-17	5.59371471558435e-17	3.82812817115997e-17	4.38029131816541e-17	3.30446240322589e-17	4.19402685232316e-17	3.05657560773488e-17	2.2668309776167e-17	2.2473508699962e-17	4.32453464291221e-17	1.36339153643479e-17	3.65831797994709e-17	3.03143416150141e-17	3.26129459515363e-17	4.66586653224504e-17
2008039	5	5.22642544862452e-17	5.62452892675578e-17	4.82410663172205e-17	4.90511672632887e-17	4.81616003418772e-17	5.49237759642406e-17	3.76245569784562e-17	4.28627991427582e-17	3.83105444091068e-17	4.19774987908473e-17	2.94279849873748e-17	2.379538264343e-17	2.2648795253187e-17	4.32509099921783e-17	1.29140731367598e-17	3.62418621300608e-17	2.86095771447053e-17	3.78775250362856e-17	4.61062082979867e-17
2008039	6	5.47036903740942e-17	5.58966483909613e-17	4.87337752398077e-17	5.01404309881339e-17	4.83769020573234e-17	5.39269570307102e-17	3.83529140524105e-17	4.23332654730492e-17	4.25980884654295e-17	4.24973539964747e-17	2.94429945680835e-17	2.5405312059281e-17	2.26580939921686e-17	4.31208014724762e-17	1.23859173251591e-17	3.59564202825187e-17	2.81745423905741e-17	4.40474491131538e-17	4.57363661984668e-17
2008039	7	5.61815283095658e-17	5.54887569005383e-17	4.89839395179139e-17	5.13612308292242e-17	4.84453821324552e-17	5.30455463719153e-17	3.94634045415276e-17	4.22725258851223e-17	4.76458228922304e-17	4.38577260764248e-17	3.0158869731708e-17	2.76939689307756e-17	2.30842769414059e-17	4.30012214804466e-17	1.20233783890887e-17	3.54892448216781e-17	2.74432761715057e-17	4.98386960613089e-17	4.57216287955113e-17
2008039	8	5.53306803767111e-17	5.5110844690836e-17	4.92510266320273e-17	5.21694486695482e-17	4.77139547529105e-17	5.50868329167848e-17	4.08264776202058e-17	4.28027377886254e-17	5.10485833143986e-17	4.55187888306013e-17	3.12968343729231e-17	3.07114900446434e-17	2.41110222192316e-17	4.3060770071043e-17	1.18702791692002e-17	3.46860157059914e-17	2.74019386753836e-17	5.43446038383336e-17	4.60485876698878e-17
2008039	9	5.48312756551324e-17	5.47305321381668e-17	5.98712155670819e-17	5.26785871464564e-17	4.66585028233822e-17	5.52282713980803e-17	4.28859881401649e-17	4.3657215386522e-17	5.31591149695741e-17	4.68293409094231e-17	3.21446582035291e-17	3.39191520232486e-17	2.726278822513e-17	4.42430228712907e-17	1.16985701452236e-17	3.37443077431694e-17	2.84683173481725e-17	5.30449259238893e-17	4.62380264383312e-17
2008039	10	5.45937639192846e-17	5.35376132904518e-17	6.95833067096423e-17	5.57863819219134e-17	4.54099363869783e-17	5.77606707180985e-17	5.72503495731425e-17	4.54785602889303e-17	5.01298307507986e-17	5.59485837500578e-17	3.32268886008879e-17	3.6944907380642e-17	3.34248570957619e-17	4.46617049909773e-17	1.17047765895408e-17	3.30670065086652e-17	3.02438873256156e-17	5.01828230407252e-17	4.62737675214038e-17
2008039	11	5.47057562970052e-17	5.37941042749878e-17	7.19200281174139e-17	5.63039331793892e-17	4.45165860265711e-17	5.79606542336326e-17	5.89028835611677e-17	4.88159030296524e-17	4.96679781170884e-17	5.76505547314962e-17	3.43596819342266e-17	3.93595298714331e-17	4.31190723933518e-17	4.42144600477947e-17	1.17922348556149e-17	3.27688992549967e-17	3.24147095592326e-17	4.91631974829816e-17	4.76225892966234e-17
2008039	12	5.43069070057599e-17	5.67602378184335e-17	7.11757420693412e-17	5.65196505606685e-17	4.41847113839055e-17	5.94895049059221e-17	5.59500881634623e-17	5.3044107276747e-17	5.07460136258972e-17	5.8387814556209e-17	3.52911652460848e-17	4.13062326710094e-17	5.20288918148861e-17	4.25747281794165e-17	1.17922392916566e-17	3.28543577632186e-17	3.58144422234705e-17	5.00651722604679e-17	5.03546138433585e-17
2008039	13	5.38408790048078e-17	5.61319342098342e-17	6.66676659475533e-17	5.63188893145405e-17	4.51226736350967e-17	6.02440956604285e-17	5.48646436703107e-17	5.62498581077561e-17	5.13132682682634e-17	5.94146205323895e-17	3.60611361753761e-17	4.20481972793145e-17	5.48433066168252e-17	4.04083387975754e-17	1.17904179871928e-17	3.33472883523301e-17	3.94180771052008e-17	5.18448437798843e-17	5.16931349882828e-17
2008039	14	5.33276946271624e-17	5.53813925823593e-17	6.30236465446531e-17	5.58078534805434e-17	4.71992305844102e-17	5.94261710920353e-17	5.55617918888935e-17	5.74823972289742e-17	5.0715860085543e-17	5.88947713114829e-17	3.67808103791637e-17	4.24382881410762e-17	5.36267992069576e-17	3.78398275878933e-17	1.17678834710565e-17	3.41746172257265e-17	4.27619683901519e-17	5.27605866901671e-17	5.06737078797318e-17
2008039	15	5.27181337495558e-17	5.51865810267011e-17	6.01889080317904e-17	5.54031546856994e-17	4.92834491721892e-17	5.91779012468799e-17	5.62842595924368e-17	5.65506527220798e-17	4.95672925068288e-17	5.94706623979027e-17	3.76875916989096e-17	4.24892781664923e-17	5.13955970695103e-17	3.60205277574204e-17	1.16604974695224e-17	3.44930254443565e-17	4.52531458067165e-17	5.23377396290832e-17	4.93762650703688e-17
2008039	16	5.2181208725745e-17	5.46462613069977e-17	5.78982762643022e-17	5.52189456495722e-17	4.96013726108649e-17	5.78663872482533e-17	5.77307010602655e-17	5.54551598401702e-17	4.87759909428582e-17	5.93034921492272e-17	3.97979606509802e-17	4.2039187655649e-17	5.07660827897593e-17	3.61582438209936e-17	1.15340914072312e-17	3.37280479568511e-17	4.6130295902884e-17	5.07987561449217e-17	4.85385540886977e-17
2008039	17	5.20353466469473e-17	5.33068132593998e-17	5.61891793407701e-17	5.47423736118813e-17	4.90647367153851e-17	5.65274903831345e-17	5.33941288587282e-17	5.33792868507844e-17	4.87862222670717e-17	5.88158243946505e-17	4.36828389961889e-17	4.14797336351687e-17	5.099699750471e-17	3.6668027237268e-17	1.15020364507274e-17	3.26135577143171e-17	4.62450145376483e-17	4.90782021525668e-17	4.79183646366973e-17
2008039	18	5.14757952716409e-17	5.24787624515254e-17	5.54189310978152e-17	5.3742038023239e-17	4.82840232388841e-17	5.462527552103e-17	5.19345336462695e-17	5.13196669302959e-17	4.94685527949439e-17	5.52862752868088e-17	4.6900140047162e-17	4.21350178254421e-17	5.15482554096824e-17	3.81471950019093e-17	1.14464893633481e-17	3.13160081542064e-17	4.60296615329025e-17	4.77269591557816e-17	4.715652786786e-17
2008039	19	5.09879974962529e-17	5.21235151707726e-17	5.4740169156421e-17	5.30605634610516e-17	4.78511874146605e-17	5.32633128523253e-17	5.13239861432252e-17	5.00951657983149e-17	5.03798585573171e-17	5.40584917978303e-17	5.02769939805637e-17	4.13882737274132e-17	5.2427781682059e-17	4.11554891621947e-17	1.13747302204371e-17	3.04256376686813e-17	4.56048732419254e-17	4.68229245313809e-17	4.74714843632394e-17
2008039	20	5.18076077958774e-17	5.06246510793138e-17	5.40202967928493e-17	5.21546237647071e-17	4.90445621352463e-17	5.20409476431361e-17	5.0716663621536e-17	4.95042845405497e-17	5.10083311975506e-17	5.50385257413221e-17	5.29940012771205e-17	4.02651181159047e-17	5.34763988660138e-17	4.5493818982183e-17	1.13243622198957e-17	2.98031607318583e-17	4.51083416757347e-17	4.6653468030143e-17	4.84637560453423e-17
2008039	21	5.352918598064e-17	4.93361536021814e-17	5.47208226124376e-17	5.13332342857832e-17	5.25147390545149e-17	5.11401988018604e-17	5.02942706262056e-17	4.97739369019544e-17	5.11979188578065e-17	5.87597711369966e-17	5.25389088253152e-17	3.90794825697029e-17	5.41384824402818e-17	5.05107088224713e-17	1.13101885573443e-17	2.92800520077437e-17	4.48644756099127e-17	4.74070673667419e-17	5.03243561544033e-17
2008039	22	5.50941520193669e-17	4.85852281837882e-17	5.45567530924314e-17	5.11143290204469e-17	5.55178485944276e-17	5.07278658920134e-17	5.03701301999123e-17	4.97658512109146e-17	5.09475827221143e-17	5.93357914327093e-17	5.12263561725779e-17	3.8303431857915e-17	5.36471973241306e-17	5.32518274883854e-17	1.13008563391711e-17	2.87550474170199e-17	4.46892328686555e-17	4.85691117280234e-17	5.33185388579811e-17
2008039	23	5.65108876509254e-17	4.85917620868924e-17	5.38310511925692e-17	5.14095024689585e-17	5.76483326273626e-17	5.09571219315356e-17	5.10652875153997e-17	5.03039093888714e-17	5.03541889068761e-17	5.89787586210835e-17	4.9100198257783e-17	3.91203396914646e-17	5.19485643384405e-17	5.27137734211261e-17	1.12560601693624e-17	2.82749922749184e-17	4.48125706562565e-17	4.94864464361743e-17	5.66643321521826e-17
2008040	0	5.79337372790402e-17	5.02560487278162e-17	5.34494653547462e-17	5.06025583593105e-17	5.87462991859135e-17	5.02008681265008e-17	5.16730145381504e-17	5.19266086181951e-17	4.96294797742424e-17	5.83358922398015e-17	4.76579751030708e-17	3.936084083517e-17	4.89966105343221e-17	5.02166657751581e-17	1.11650922407537e-17	2.79560286560665e-17	4.52424727476519e-17	5.02207968001942e-17	5.95444374628012e-17
2008040	1	5.96136305225623e-17	5.0017595183135e-17	5.26207693131333e-17	4.91351979343154e-17	5.86018959933162e-17	4.95081722198901e-17	5.1393596205569e-17	5.39784608425868e-17	4.90713599477258e-17	5.70850848588809e-17	4.84381511921669e-17	3.81828899782843e-17	4.53803604791214e-17	4.72819226220148e-17	1.10511504417161e-17	2.7875915331371e-17	4.61590284092018e-17	5.07917917945338e-17	6.15146632554444e-17
2008040	2	6.13701686799731e-17	4.99914117376821e-17	5.12621710174022e-17	4.87232520415831e-17	5.793762879144e-17	4.90202768520111e-17	5.03039511731984e-17	5.57308956919545e-17	4.89238393236418e-17	5.52073498429688e-17	5.03493307734171e-17	3.65297865263473e-17	4.20696231591057e-17	4.49294523290701e-17	1.09136290133841e-17	2.79822645462938e-17	4.74845987434983e-17	5.1377903291365e-17	6.24755466770561e-17
2008040	3	6.29195305525723e-17	5.0297157799259e-17	4.95679273487983e-17	4.91937753987778e-17	5.68474222194641e-17	4.85010717628293e-17	4.96007038603777e-17	5.65924059095346e-17	4.92099946574043e-17	5.39561153942492e-17	5.23103631103392e-17	3.61224139697984e-17	3.9890390670834e-17	4.34838335445483e-17	1.07644556663976e-17	2.80886087202077e-17	4.8301076145355e-17	5.21755422651678e-17	6.24548107771267e-17
2008040	4	6.45210942944205e-17	5.57175529792983e-17	4.84010686392997e-17	5.00423604186962e-17	5.52526973277061e-17	4.77677433063435e-17	4.92445353864555e-17	5.70105657843594e-17	4.97879218331274e-17	5.37153458185109e-17	5.39309621423383e-17	3.68476022589052e-17	3.94253866977525e-17	4.28196547667235e-17	1.06167929467501e-17	2.80215311529801e-17	4.86523929797648e-17	5.36690854860034e-17	6.14090494853582e-17
2008040	5	6.62934823567209e-17	5.65946963143904e-17	4.75215384957723e-17	5.13206475283123e-17	5.44477827159282e-17	4.71436561007708e-17	4.92511414472502e-17	5.74744333935142e-17	5.07815253996856e-17	5.44868624264412e-17	5.50563242107845e-17	3.7736995597708e-17	3.97402226108622e-17	4.23821704486696e-17	1.04699645897962e-17	2.75422151204477e-17	4.93381553228172e-17	5.64633368951419e-17	6.0002748716806e-17
2008040	6	6.80242176630987e-17	5.87305786360498e-17	4.67556847686986e-17	5.86527269889619e-17	5.57263728039429e-17	4.66486053356319e-17	4.97623280721224e-17	5.79183862783043e-17	5.38898146571726e-17	5.62547719900063e-17	5.55096200077454e-17	3.78860638553933e-17	4.02284100261173e-17	4.23820924451976e-17	1.03406375176464e-17	2.6756461643762e-17	4.97153476325639e-17	5.74769247096709e-17	5.86055510891034e-17
2008040	7	6.94693146186333e-17	5.8941779875484e-17	4.6069667398239e-17	5.88249172140361e-17	5.72498124277374e-17	4.65359501101565e-17	5.07074377745463e-17	5.86982897400578e-17	5.80203627070611e-17	6.01609489387396e-17	5.54445147168374e-17	3.77815323252226e-17	4.0621101971879e-17	4.21260185093069e-17	1.0312542668844e-17	2.59371378012401e-17	4.93133302616691e-17	5.7598340453342e-17	5.72361219506886e-17
2008040	8	7.04803031019242e-17	5.83463543762649e-17	4.59640399653712e-17	5.67937572442287e-17	5.89870960573968e-17	4.56200856674726e-17	5.65238116513491e-17	6.01145643585736e-17	5.84371982938507e-17	6.11406296776871e-17	5.5001551536087e-17	3.75650643198433e-17	4.09036263809218e-17	4.15583016295248e-17	1.12684600721774e-17	2.72459399573122e-17	4.87560147627021e-17	5.76781824591338e-17	5.60660167705336e-17
2008040	9	7.12097982098711e-17	5.81136336187971e-17	4.91289526824696e-17	5.79308829464084e-17	6.06368207879987e-17	4.47076602993368e-17	5.83071312935735e-17	6.16367991451441e-17	5.79440519693422e-17	6.1888520040268e-17	5.41610362122076e-17	3.76604799047269e-17	4.13856989868395e-17	4.09692777684205e-17	1.20642189630264e-17	2.89164648058237e-17	4.83089476762475e-17	5.77403359514178e-17	5.49956823734837e-17
2008040	10	7.16722696232079e-17	5.85825577809974e-17	5.15130366616037e-17	6.41019254793472e-17	6.10839751163861e-17	4.75919982698816e-17	5.80917176676666e-17	6.28847131930168e-17	5.79169522679606e-17	6.25133754862929e-17	5.32099730065153e-17	4.06204079420477e-17	4.37269305600322e-17	4.03728654950493e-17	1.4175189451848e-17	2.94612220592392e-17	4.78798482686381e-17	5.74641272486492e-17	5.39743892259676e-17
2008040	11	7.17701434372869e-17	6.39429573537072e-17	5.41588312115771e-17	6.78500126773018e-17	6.08672726929501e-17	4.98659792708677e-17	5.91050898571854e-17	6.37153134584634e-17	5.86043669408293e-17	6.26185313668833e-17	5.23031285003971e-17	4.2540390655038e-17	4.49127160920875e-17	3.97383419287909e-17	2.13124719236269e-17	3.22695437581147e-17	4.85033754446935e-17	5.6943636518571e-17	5.57090450028323e-17
2008040	12	7.1712179009057e-17	6.88946348081023e-17	5.28573982341973e-17	6.632443672059e-17	6.19509456730362e-17	5.03055782236068e-17	6.01495145262685e-17	6.40082318941408e-17	5.90634324889631e-17	6.19626254883848e-17	5.14627738000121e-17	4.33397942564739e-17	4.5808442878327e-17	3.91755202308115e-17	2.61800178905021e-17	3.23920937476873e-17	5.13005704931832e-17	5.65192626028488e-17	5.35751120317347e-17
2008040	13	7.12237588175761e-17	6.69837751435721e-17	5.18619235145348e-17	6.46970700912352e-17	6.31781607475312e-17	4.96586014378695e-17	6.03598930471533e-17	6.40602676668026e-17	5.94320722073613e-17	6.1333504580278e-17	5.0634610129925e-17	4.39991445247948e-17	4.63765724128659e-17	3.88012525835124e-17	2.83989469543593e-17	3.20414141115191e-17	5.35358801217321e-17	5.62750105340422e-17	5.33897765041339e-17
2008040	14	7.0359936600742e-17	6.49067029476991e-17	5.20943593807214e-17	6.31690580008797e-17	6.33534433977172e-17	4.791808547888e-17	6.10922351014752e-17	6.37109740094827e-17	5.97153334107617e-17	6.09824573700931e-17	4.97695427155093e-17	4.5393676278808e-17	4.65391348159672e-17	3.86945857435698e-17	2.8492686585745e-17	3.15696707354325e-17	5.58949715674619e-17	5.62781961187142e-17	5.10809897192897e-17
2008040	15	6.86898456266981e-17	6.3296230470307e-17	5.09808763809019e-17	6.15285964812649e-17	6.24750608541278e-17	4.55311834097007e-17	6.18660508688058e-17	6.29337767515481e-17	5.9985831608803e-17	6.09754808944238e-17	4.8837261225873e-17	4.61093992447969e-17	4.65300463900414e-17	3.87018645334031e-17	2.81984028539958e-17	3.10881128952918e-17	5.7597372622621e-17	5.64473235297658e-17	4.88678479281522e-17
2008040	16	6.66574713004616e-17	6.12005651029385e-17	4.93355802621362e-17	5.90901754527944e-17	6.12996860509723e-17	4.33819317183445e-17	6.24710853410638e-17	6.18305563403886e-17	6.01007562393778e-17	6.09662891896649e-17	4.78212863542738e-17	4.59868201904633e-17	4.57599769002884e-17	3.86784400628689e-17	2.73720750136344e-17	3.07344806105344e-17	5.86238505883675e-17	5.67501162236842e-17	4.74094997820868e-17
2008040	17	6.44138217158898e-17	5.87946167206007e-17	4.64296396746393e-17	5.664260731037e-17	6.01977780494677e-17	4.11565705705461e-17	6.22017941269849e-17	6.06359452173027e-17	6.01014448129368e-17	6.04570611895733e-17	4.68422216357151e-17	4.50802826817997e-17	4.45083576264118e-17	3.85390971439321e-17	2.57963121392431e-17	3.10299913325978e-17	5.94371457390355e-17	5.69779620327945e-17	4.58650275470706e-17
2008040	18	6.18459720364306e-17	5.6624919741889e-17	4.39059215330455e-17	5.42418671541438e-17	5.91236833436507e-17	3.90497429092732e-17	6.15664839783556e-17	5.99059636851336e-17	6.00057449469267e-17	5.96570530607003e-17	4.59198830887566e-17	4.42545381414023e-17	4.38447887740268e-17	3.84783063040038e-17	2.5061220325267e-17	3.17206094512596e-17	5.94712284137164e-17	5.69351580469473e-17	4.47076774445575e-17
2008040	19	5.86632216733443e-17	5.47621033658111e-17	4.20293963937245e-17	5.1904465851623e-17	5.8330073025408e-17	3.68418184304816e-17	6.07284579598938e-17	5.89436312503738e-17	5.97016141742455e-17	5.83663541977589e-17	4.49662520578487e-17	4.32379278119208e-17	4.3785618794841e-17	3.83522886166346e-17	2.48000383421725e-17	3.13679732620232e-17	5.8823277635264e-17	5.66589578816465e-17	4.40006060038258e-17
2008040	20	5.63998716414868e-17	5.38485596578297e-17	4.09933673376567e-17	4.95581032852519e-17	5.76193928369352e-17	3.50323136778233e-17	5.94451653158012e-17	5.74574357722696e-17	5.9186858746064e-17	5.66847760356836e-17	4.39282152639446e-17	4.23124100124252e-17	4.50427829295799e-17	3.82255066490929e-17	2.38886047798173e-17	3.07787144004368e-17	5.78190592205642e-17	5.60510141447732e-17	4.36489463358176e-17
2008040	21	5.47251893137574e-17	5.32991936484824e-17	4.01070827733227e-17	4.80761005974724e-17	5.69845417265944e-17	3.36141483911669e-17	5.77742178557758e-17	5.72129185545022e-17	5.84796273603338e-17	5.47786379521842e-17	4.28990261212541e-17	4.15487731646683e-17	4.47399281400108e-17	3.80053267501343e-17	2.33109097328468e-17	3.01215755676139e-17	5.68810165093173e-17	5.51430418864575e-17	4.35380232301131e-17
2008040	22	5.34962829158932e-17	5.22557746746824e-17	3.90610614576021e-17	4.64669704486811e-17	5.6483340802788e-17	3.24989728929216e-17	5.58872089418571e-17	5.72965348006362e-17	5.75508513401097e-17	5.29382299378732e-17	4.20844807815903e-17	4.08862434449224e-17	4.4415217152987e-17	3.74813462956099e-17	2.29360507910781e-17	2.96068863596642e-17	5.64318535354149e-17	5.40924265488493e-17	4.33539361478033e-17
2008040	23	5.24716377629273e-17	5.11567276992585e-17	3.78985882279075e-17	4.47323177617543e-17	5.60433386527034e-17	3.17398055804179e-17	5.4071680259445e-17	5.72786005865062e-17	5.65076144849453e-17	5.13888277928302e-17	4.142927636585e-17	4.02627567035893e-17	4.41953549636584e-17	3.6829279599757e-17	2.26193945176943e-17	2.92982037583854e-17	5.64690167508359e-17	5.28880597430995e-17	4.30043474897291e-17
2008041	0	5.15764615730224e-17	4.99084598283254e-17	3.66794203886768e-17	4.23453295033093e-17	5.55038437732773e-17	3.16475807463477e-17	5.25433275270228e-17	5.71756118819716e-17	5.52969276628386e-17	5.01662036999672e-17	4.08731666675574e-17	3.97878610534988e-17	4.39486847871733e-17	3.61739670578686e-17	2.25126751768839e-17	2.92134723265778e-17	5.67502931912458e-17	5.15052566941155e-17	4.27512272610226e-17
2008041	1	5.08332072748738e-17	4.87281370071052e-17	3.55126878993965e-17	4.05842252719729e-17	5.51359213252078e-17	3.10455066064546e-17	5.11723078990903e-17	5.96792081447628e-17	5.39913252364006e-17	4.91803781662739e-17	4.03855899173927e-17	3.94766916177706e-17	4.3643841125129e-17	3.55423190000207e-17	2.26399196305674e-17	2.92935142849621e-17	5.55993519845635e-17	5.00917474356132e-17	4.25555103353146e-17
2008041	2	5.02031248370491e-17	4.75437287864549e-17	3.4409208291206e-17	3.93157952608358e-17	5.65495399644139e-17	3.00963565436681e-17	5.01009056909355e-17	6.03997661955888e-17	5.26867700289696e-17	4.83388683528777e-17	3.98928729434813e-17	3.920797685966e-17	4.32376353194695e-17	3.49014814642134e-17	2.33883244349758e-17	2.94216005375495e-17	5.46619202722888e-17	4.86424721360168e-17	4.23310232680863e-17
2008041	3	4.97419598276817e-17	4.62239060441983e-17	3.34116882246664e-17	3.82902480832262e-17	5.78104077217784e-17	2.93498359605682e-17	4.91563757203613e-17	6.00240318857562e-17	5.16158890392452e-17	4.75600893242593e-17	3.94353866886367e-17	3.88475837713835e-17	4.37979231695224e-17	3.42043152794734e-17	2.48151316016963e-17	2.9593326845167e-17	5.46053514573761e-17	4.71678412674717e-17	4.19941617581268e-17
2008041	4	4.95329171180524e-17	4.44003043734727e-17	3.25505856094002e-17	3.71270471877813e-17	5.7768543250849e-17	2.87387397110375e-17	4.81324698703657e-17	5.9577846988929e-17	5.02254723489956e-17	4.68192798564181e-17	3.90706039334196e-17	3.83612707649671e-17	4.39213861449695e-17	3.35210843059773e-17	2.65645542464353e-17	2.99384680861615e-17	5.51982858353956e-17	4.5903352277258e-17	4.16047585819613e-17
2008041	5	4.94890061539031e-17	4.28811800297258e-17	3.18186246199824e-17	3.58506152411568e-17	5.77955375514578e-17	2.83110394712396e-17	4.71361155013725e-17	5.89468396588545e-17	4.88422333634471e-17	4.59455290029942e-17	3.88017640403913e-17	3.77733712222393e-17	4.39516127965346e-17	3.29286497057342e-17	2.91866467156969e-17	3.0551969003951e-17	5.5397902143749e-17	4.48212961873149e-17	4.12741321335675e-17
2008041	6	4.94535024110399e-17	4.15499496364613e-17	3.11655963686413e-17	3.46741723773847e-17	5.65986464212913e-17	2.79189374610402e-17	4.62469651190587e-17	5.81592694363538e-17	4.73970467082595e-17	4.50615984592086e-17	3.85816977212907e-17	3.71519531343079e-17	4.3877879047767e-17	3.23723052239985e-17	3.17502142733869e-17	3.11935115729093e-17	5.50849834653966e-17	4.38508175333793e-17	4.09802565594783e-17
2008041	7	4.93249389203343e-17	4.01521860936979e-17	3.05935023733211e-17	3.35893763871841e-17	5.47477842598486e-17	2.75255744522859e-17	4.52815210983081e-17	5.70016249468345e-17	4.60628144393946e-17	4.4237234431876e-17	3.82843133062922e-17	3.65809785481585e-17	4.35516309589988e-17	3.17846261896092e-17	3.40693029557577e-17	3.31335417949886e-17	5.41749093849356e-17	4.29865302055081e-17	4.06629409729001e-17
2008041	8	4.90593836955805e-17	3.88900527446343e-17	3.00849699635989e-17	3.30825049844307e-17	5.35567578641574e-17	2.73399621197127e-17	4.42352332865547e-17	5.58827578616162e-17	4.49892239086011e-17	4.34947729450921e-17	3.77746864705659e-17	3.60839712608991e-17	4.26370586508178e-17	3.11237461264341e-17	3.60934263044297e-17	3.88839287229979e-17	5.24424245787345e-17	4.22058934961775e-17	4.03752656814115e-17
2008041	9	4.855908195485e-17	4.13172779422272e-17	3.24768530130809e-17	3.29539503936289e-17	5.22957282409424e-17	2.95446204634479e-17	4.32246966202973e-17	5.39677564790368e-17	4.41239134758243e-17	4.27796026097327e-17	3.69932117635424e-17	3.57276229006219e-17	4.32534524859648e-17	3.04258630360423e-17	3.7416660406087e-17	4.13212052693388e-17	5.04611360661831e-17	4.15033330226967e-17	4.00880693284539e-17
2008041	10	4.78208853387883e-17	4.12192728529132e-17	3.51944559864044e-17	4.10359189369756e-17	5.09492703683564e-17	3.19921162052798e-17	4.28898035568714e-17	5.22656836847603e-17	4.33611820418342e-17	4.20197837194949e-17	3.62099292772108e-17	3.55429475005931e-17	4.44756765941362e-17	2.97818242902231e-17	4.04080358710516e-17	4.06498807993894e-17	4.97991052056988e-17	4.08372758831873e-17	3.9640808458369e-17
[truncated: 469 more rows]
