# Supplementary material for: A comparison of sea salt emission parameterizations in northwestern Europe using a chemistry transport model setup
Source: Copernicus journal article supplement (doi:10.5194/acp-16-9905-2016), 2016-08-08
Supplement: Supplementary file 2 [file acp-16-9905-2016-supplement.zip › input_files/griddef_CMAQ_CD24]

#
# gridID 0
#
gridtype  = curvilinear
gridsize  = 11872
xname     = lon
xlongname = longitude coordinate
xunits    = degrees_east
yname     = lat
ylongname = latitude coordinate
yunits    = degrees_north
xsize     = 112
ysize     = 106
xvals     = -7.6639967 -7.36771011 -7.07093954 -6.77369165 -6.47597408 -6.1777935 
            -5.87915754 -5.58007288 -5.28054762 -4.98058891 -4.68020391 -4.37940025 
            -4.07818604 -3.77656841 -3.47455549 -3.17215514 -2.86937499 -2.56622314 
            -2.26270771 -1.95883667 -1.65461826 -1.35006046 -1.04517174 -0.739960313 
            -0.434434593 -0.128602996 0.177526012 0.48394388 0.790642083 1.0976119 
            1.40484476 1.71233189 2.02006459 2.32803369 2.63623095 2.94464707 3.25327325 
            3.56210065 3.87111998 4.18032217 4.48969841 4.79923964 5.10893679 5.41878033 
            5.7287612 6.03887033 6.34909868 6.65943623 6.96987486 7.28040409 7.59101534 
            7.90169954 8.21244621 8.52324772 8.83409309 9.14497375 9.45588017 9.76680279 
            10.077733 10.3886604 10.6995754 11.0104704 11.3213348 11.6321592 11.942934 
            12.2536507 12.5642996 12.8748713 13.1853561 13.4957457 13.8060293 14.1161995 
            14.4262457 14.7361593 15.0459309 15.3555508 15.6650105 15.9743013 16.2834129 
            16.5923386 16.9010658 17.2095871 17.5178947 17.8259792 18.133831 18.4414425 
            18.7488041 19.0559063 19.3627415 19.6693001 19.9755745 20.2815571 20.5872364 
            20.8926067 21.1976566 21.5023804 21.8067703 22.110817 22.4145107 22.7178459 
            23.0208111 23.3234024 23.6256104 23.9274273 24.2288437 24.5298538 24.8304482 
            25.130621 25.4303646 25.7296715 26.028532 26.3269405 -7.73063231 -7.43330002 
            -7.1354785 -6.83717442 -6.5383954 -6.23914814 -5.93944073 -5.63927937 
            -5.33867264 -5.03762722 -4.73615122 -4.43425179 -4.13193703 -3.82921457 
            -3.52609229 -3.22257805 -2.91867995 -2.61440563 -2.30976391 -2.00476217 
            -1.69940937 -1.39371324 -1.08768237 -0.781325161 -0.474650055 -0.167665526 
            0.139619797 0.447197318 0.755058408 1.06319427 1.3715961 1.68025517 1.98916268 
            2.29830956 2.607687 2.91728592 3.22709727 3.537112 3.84732103 4.15771532 
            4.46828556 4.77902269 5.08991718 5.40096045 5.71214247 6.02345371 6.33488607 
            6.64642906 6.95807362 7.26981068 7.58163023 7.89352322 8.20548058 8.51749229 
            8.82954884 9.14164066 9.45375919 9.76589394 10.0780354 10.3901749 10.7023029 
            11.0144091 11.3264847 11.6385202 11.9505053 12.2624321 12.5742893 12.8860693 
            13.1977606 13.5093555 13.8208447 14.1322174 14.4434652 14.7545795 15.0655489 
            15.3763657 15.6870213 15.9975042 16.3078079 16.6179199 16.9278336 17.2375412 
            17.5470295 17.8562927 18.1653214 18.4741058 18.7826366 19.0909081 19.3989067 
            19.7066269 20.0140591 20.3211956 20.628027 20.9345436 21.2407398 21.5466042 
            21.852129 22.1573067 22.4621296 22.7665901 23.0706768 23.3743839 23.6777039 
            23.9806271 24.2831459 24.5852547 24.8869419 25.1882038 25.4890308 25.7894154 
            26.0893517 26.3888302 -7.7977643 -7.49937916 -7.20049953 -6.90113211 
            -6.6012845 -6.3009634 -6.00017691 -5.69893169 -5.39723587 -5.09509659 
            -4.79252195 -4.48951912 -4.18609571 -3.88226056 -3.57802105 -3.27338505 
            -2.96836066 -2.662956 -2.3571794 -2.05103922 -1.74454355 -1.43770075 
            -1.13051939 -0.823007941 -0.515174866 -0.207028896 0.101421386 0.410167247 
            0.719199896 1.02851057 1.3380903 1.64793026 1.9580214 2.26835489 2.57892156 
            2.8897121 3.20071769 3.51192927 3.82333732 4.13493252 4.44670582 4.75864792 
            5.07074976 5.38300133 5.69539356 6.00791693 6.32056236 6.63331985 6.94618034 
            7.25913382 7.57217169 7.88528299 8.19845963 8.51169109 8.82496834 9.13828182 
            9.45162106 9.76497746 10.0783415 10.3917017 10.7050514 11.0183792 11.3316755 
            11.6449308 11.9581356 12.2712812 12.5843573 12.8973541 13.2102623 13.5230722 
            13.8357754 14.1483603 14.4608192 14.7731428 15.0853205 15.3973436 15.7092028 
            16.0208874 16.3323898 16.6437016 16.9548111 17.2657108 17.5763912 17.8868408 
            18.1970558 18.507021 18.8167324 19.1261787 19.4353523 19.7442417 20.0528412 
            20.3611412 20.6691303 20.9768047 21.2841511 21.5911655 21.8978348 22.204155 
            22.5101147 22.8157063 23.1209202 23.4257526 23.7301903 24.0342293 24.3378601 
            24.6410732 24.9438629 25.2462215 25.5481396 25.8496113 26.1506271 26.4511833 
            -7.86539793 -7.56595325 -7.26600838 -6.96557045 -6.66464663 -6.36324453 
            -6.0613718 -5.75903511 -5.45624256 -5.15300179 -4.84932041 -4.54520607 
            -4.24066734 -3.93571115 -3.63034606 -3.32458019 -3.01842165 -2.7118783 
            -2.40495896 -2.09767175 -1.79002476 -1.48202693 -1.17368662 -0.865012288 
            -0.55601269 -0.246696562 0.0629273877 0.372850329 0.683063388 0.993557692 
            1.30432427 1.61535406 1.92663789 2.23816705 2.54993176 2.86192346 3.17413259 
            3.48654985 3.79916596 4.11197186 4.42495728 4.73811388 5.05143213 5.36490154 
            5.67851353 5.99225855 6.30612612 6.62010813 6.93419361 7.24837351 7.56263828 
            7.8769784 8.19138432 8.50584507 8.82035255 9.13489628 9.44946671 9.7640543 
            10.0786486 10.3932409 10.7078209 11.0223799 11.3369064 11.651392 11.965826 
            12.2802 12.5945044 12.9087276 13.2228613 13.5368967 13.8508224 14.1646299 
            14.4783096 14.791852 15.1052465 15.4184847 15.7315578 16.0444546 16.3571663 
            16.6696835 16.9819984 17.2940998 17.6059799 17.9176273 18.2290344 18.5401936 
            18.8510933 19.1617241 19.4720783 19.7821484 20.0919228 20.4013939 20.7105522 
            21.0193901 21.3278999 21.6360683 21.9438934 22.2513599 22.558466 22.8651981 
            23.1715488 23.4775124 23.7830791 24.0882416 24.3929901 24.6973171 25.001215 
            25.304678 25.6076946 25.9102612 26.2123661 26.5140057 -7.93353844 -7.63302708 
            -7.33201027 -7.03049421 -6.72848749 -6.42599678 -6.12302971 -5.81959438 
            -5.51569748 -5.21134758 -4.90655184 -4.60131836 -4.29565525 -3.98957038 
            -3.68307209 -3.37616825 -3.06886697 -2.76117706 -2.4531064 -2.14466357 
            -1.83585715 -1.52669561 -1.21718764 -0.907341897 -0.597167075 -0.286672056 
            0.0241343845 0.335243285 0.646645725 0.958332598 1.2702949 1.58252358 
            1.8950094 2.20774317 2.52071548 2.83391714 3.14733911 3.46097136 3.77480507 
            4.08883047 4.4030385 4.71741867 5.03196239 5.34665966 5.66150093 5.97647619 
            6.29157686 6.60679197 6.92211246 7.23752832 7.55303049 7.868608 8.18425274 
            8.49995327 8.81569958 9.13148403 9.44729519 9.76312351 10.0789595 10.3947926 
            10.7106133 11.026412 11.3421783 11.6579037 11.9735775 12.2891893 12.6047306 
            12.9201908 13.2355604 13.5508299 13.8659887 14.1810274 14.4959373 14.810708 
            15.125329 15.4397926 15.7540874 16.0682049 16.3821354 16.6958714 17.0093994 
            17.3227119 17.6357994 17.9486542 18.2612648 18.5736237 18.8857193 19.197546 
            19.5090923 19.8203487 20.1313076 20.4419594 20.7522945 21.0623074 21.3719845 
            21.6813202 21.9903049 22.2989311 22.6071892 22.9150696 23.2225666 23.5296707 
            23.8363724 24.1426659 24.4485397 24.7539902 25.0590038 25.3635788 25.6677036 
            25.9713707 26.2745724 26.5773029 -8.0021925 -7.7006073 -7.39851046 -7.0959096 
            -6.79281235 -6.48922539 -6.18515682 -5.88061476 -5.57560587 -5.27013874 
            -4.964221 -4.65786028 -4.35106516 -4.04384375 -3.73620343 -3.42815351 
            -3.11970139 -2.8108561 -2.50162578 -2.19201922 -1.88204455 -1.57171082 
            -1.2610265 -0.950000584 -0.638641715 -0.326958925 -0.0149611039 0.297342718 
            0.609943509 0.922832131 1.23599935 1.54943609 1.86313295 2.17708063 2.49126983 
            2.805691 3.12033486 3.43519187 3.75025249 4.06550741 4.38094616 4.69656038 
            5.01233912 5.32827377 5.64435387 5.96056986 6.27691221 6.59337044 6.90993595 
            7.22659731 7.54334593 7.86017179 8.17706394 8.49401379 8.81101036 9.12804508 
            9.44510651 9.7621851 10.0792713 10.3963556 10.7134275 11.0304766 11.3474932 
            11.6644678 11.98139 12.2982502 12.6150389 12.9317446 13.2483597 13.5648727 
            13.8812742 14.1975546 14.5137043 14.8297129 15.1455708 15.4612684 15.7767954 
            16.092144 16.4073029 16.7222633 17.037014 17.3515472 17.6658535 17.9799232 
            18.2937469 18.6073151 18.9206181 19.2336483 19.5463943 19.8588467 20.1709995 
            20.4828396 20.794363 21.1055565 21.4164124 21.7269211 22.037077 22.3468685 
            22.6562881 22.9653282 23.2739773 23.5822296 23.8900757 24.1975079 24.5045166 
            24.8110962 25.1172352 25.4229298 25.7281685 26.0329437 26.3372517 26.6410789 
            -8.07136536 -7.76869869 -7.46551514 -7.16182137 -6.85762596 -6.5529356 
            -6.24775791 -5.942101 -5.6359725 -5.32938051 -5.02233267 -4.71483707 
            -4.40690184 -4.09853506 -3.78974509 -3.48054051 -3.17092943 -2.86092019 
            -2.55052185 -2.23974252 -1.92859113 -1.6170764 -1.30520713 -0.992992103 
            -0.680440366 -0.367560834 -0.05436261 0.2591452 0.572953463 0.887052953 
            1.20143437 1.51608837 1.83100557 2.14617658 2.46159196 2.77724218 3.09311771 
            3.40920877 3.72550583 4.04199934 4.35867929 4.67553663 4.99256039 5.30974197 
            5.6270709 5.94453716 6.26213121 6.57984304 6.89766216 7.21557999 7.53358507 
            7.85166788 8.16981888 8.48802757 8.80628395 9.12457848 9.44290066 9.76124001 
            10.079587 10.3979311 10.7162638 11.0345726 11.352849 11.6710835 11.9892645 
            12.3073826 12.6254282 12.9433908 13.26126 13.5790272 13.8966808 14.2142124 
            14.5316114 14.8488674 15.1659718 15.482913 15.7996836 16.116272 16.4326687 
            16.7488632 17.0648479 17.3806114 17.696146 18.0114403 18.3264847 18.6412716 
            18.9557915 19.2700329 19.5839882 19.897646 20.2110004 20.5240402 20.8367577 
            21.1491432 21.4611855 21.7728786 22.0842133 22.3951797 22.7057686 23.015974 
            23.3257847 23.6351948 23.9441929 24.2527714 24.5609245 24.8686409 25.1759129 
            25.4827347 25.7890949 26.0949898 26.4004078 26.7053413 -8.14106178 -7.83730698 
            -7.53302908 -7.22823572 -6.92293453 -6.61713266 -6.31083822 -6.00405931 
            -5.69680309 -5.38907814 -5.08089209 -4.77225304 -4.46316957 -4.15364933 
            -3.8437016 -3.53333402 -3.22255516 -2.91137385 -2.59979868 -2.28783822 
            -1.97550118 -1.66279662 -1.34973347 -1.03632045 -0.722566783 -0.408481479 
            -0.0940737203 0.220647261 0.535672188 0.850991786 1.16659665 1.48247731 
            1.7986244 2.11502838 2.43167925 2.74856806 3.0656848 3.38301969 3.70056295 
            4.01830482 4.336236 4.65434551 4.97262478 5.29106283 5.60965014 5.92837667 
            6.24723244 6.56620741 6.8852911 7.20447397 7.52374601 7.84309673 8.16251564 
            8.48199368 8.80152035 9.12108421 9.44067669 9.76028728 10.0799046 10.3995199 
            10.7191219 11.038702 11.3582487 11.6777515 11.9972019 12.3165874 12.6359005 
            12.9551287 13.2742634 13.5932941 13.9122114 14.2310038 14.5496616 14.8681755 
            15.1865349 15.5047312 15.822753 16.1405907 16.4582348 16.7756748 17.0929012 
            17.4099045 17.7266769 18.0432053 18.3594818 18.6754971 18.9912415 19.3067036 
            19.6218777 19.9367523 20.251318 20.5655651 20.8794861 21.1930695 21.5063095 
            21.8191948 22.1317158 22.4438667 22.7556343 23.0670147 23.3779945 23.68857 
            23.9987278 24.3084641 24.6177654 24.9266281 25.2350426 25.5429993 25.8504906 
            26.1575089 26.4640465 26.7700958 -8.21128941 -7.90643883 -7.60105896 
            -7.29515791 -6.98874331 -6.68182278 -6.37440395 -6.06649446 -5.75810289 
            -5.44923687 -5.1399045 -4.83011389 -4.51987362 -4.20919228 -3.89807749 
            -3.58653855 -3.27458358 -2.96222138 -2.64946055 -2.33631015 -2.02277875 
            -1.70887566 -1.39460945 -1.07998943 -0.765024781 -0.449724555 -0.134098083 
            0.181845322 0.498096317 0.81464541 1.1314832 1.44860005 1.76598644 2.08363271 
            2.40152907 2.719666 3.03803349 3.35662198 3.67542124 3.99442172 4.31361341 
            4.63298607 4.95252943 5.27223444 5.59209013 5.91208696 6.23221445 6.55246258 
            6.87282085 7.19327974 7.51382828 7.83445644 8.15515423 8.47591114 8.79671764 
            9.11756229 9.43843555 9.75932598 10.080225 10.4011211 10.7220039 11.0428648 
            11.3636913 11.684474 12.0052023 12.3258667 12.6464567 12.9669619 13.2873716 
            13.6076756 13.927865 14.2479286 14.5678558 14.8876371 15.207263 15.5267229 
            15.8460054 16.1651039 16.484005 16.8027 17.1211777 17.4394321 17.7574501 
            18.075222 18.3927402 18.7099934 19.0269718 19.3436661 19.6600666 19.9761658 
            20.2919521 20.6074162 20.9225502 21.2373428 21.5517864 21.8658733 22.1795921 
            22.4929333 22.805891 23.1184521 23.4306126 23.7423611 24.053688 24.3645878 
            24.6750488 24.9850655 25.2946281 25.6037292 25.9123592 26.2205105 26.5281754 
            26.8353462 -8.28205299 -7.97609901 -7.66961002 -7.36259413 -7.05505848 
            -6.74701071 -6.4384594 -6.12941217 -5.81987667 -5.50986147 -5.19937468 
            -4.8884244 -4.57701969 -4.26516771 -3.95287824 -3.64015913 -3.32701921 
            -3.01346731 -2.69951224 -2.38516307 -2.07042837 -1.75531745 -1.43983936 
            -1.12400317 -0.807818294 -0.491293907 -0.1744394 0.142735824 0.460222244 
            0.778010368 1.09609056 1.41445315 1.73308861 2.05198693 2.37113833 2.69053316 
            3.01016164 3.33001328 3.65007854 3.97034717 4.29080963 4.61145496 4.93227339 
            5.25325537 5.57438946 5.8956666 6.21707582 6.5386076 6.86025047 7.18199539 
            7.50383091 7.82574701 8.14773369 8.46977997 8.79187679 9.11401176 9.43617535 
            9.758358 10.0805473 10.4027348 10.7249098 11.04706 11.3691769 11.6912498 
            12.0132675 12.3352203 12.6570978 12.9788895 13.3005838 13.6221733 13.9436445 
            14.2649889 14.5861959 14.9072552 15.228157 15.5488901 15.8694448 16.1898117 
            16.5099792 16.8299408 17.1496811 17.4691944 17.7884693 18.1074944 18.4262619 
            18.7447624 19.0629864 19.3809204 19.6985588 20.015892 20.3329067 20.6495972 
            20.9659538 21.2819653 21.5976238 21.91292 22.2278442 22.542387 22.8565388 
            23.1702938 23.4836407 23.7965717 24.1090775 24.4211483 24.7327785 25.0439568 
            25.3546772 25.6649284 25.9747047 26.2839966 26.5927982 26.9010983 -8.35335922 
            -8.04629421 -7.73868847 -7.43054962 -7.12188482 -6.81270313 -6.50301123 
            -6.19281769 -5.88213062 -5.57095814 -5.25930834 -4.94719028 -4.63461161 
            -4.32158136 -4.00810814 -3.69420028 -3.37986684 -3.06511664 -2.74995828 
            -2.43440127 -2.11845422 -1.80212653 -1.48542726 -1.16836572 -0.850951314 
            -0.533193409 -0.215101421 0.103315085 0.422046512 0.741083205 1.06041551 
            1.38003361 1.69992769 2.02008796 2.34050441 2.66116714 2.98206592 3.30319118 
            3.62453222 3.94607949 4.26782227 4.58975077 4.91185427 5.23412323 5.55654621 
            5.87911415 6.20181561 6.52464056 6.847579 7.17061949 7.49375248 7.81696749 
            8.14025307 8.46359921 8.78699589 9.11043262 9.43389797 9.75738144 10.0808735 
            10.4043617 10.7278376 11.0512896 11.3747072 11.6980801 12.0213976 12.3446493 
            12.6678247 12.9909134 13.3139038 13.6367865 13.9595509 14.2821875 14.6046839 
            14.9270315 15.2492189 15.5712357 15.8930731 16.2147198 16.5361652 16.857399 
            17.1784115 17.4991951 17.8197346 18.1400242 18.4600525 18.77981 19.099287 
            19.4184723 19.7373581 20.055933 20.3741894 20.6921139 21.0097027 21.3269405 
            21.6438236 21.9603367 22.2764759 22.5922298 22.9075871 23.2225437 23.5370865 
            23.8512077 24.1648998 24.4781532 24.7909584 25.1033077 25.4151917 25.7266045 
            26.0375347 26.3479767 26.6579208 26.9673576 -8.42521381 -8.11703014 -7.8083005 
            -7.49903059 -7.18922949 -6.87890482 -6.56806421 -6.25671673 -5.94486952 
            -5.63253164 -5.31971073 -5.00641632 -4.69265556 -4.37843847 -4.06377268 
            -3.74866724 -3.43313146 -3.11717367 -2.80080342 -2.48402929 -2.16686082 
            -1.84930718 -1.53137743 -1.21308124 -0.894427896 -0.575426936 -0.256087959 
            0.0635794103 0.383565485 0.703860521 1.02445459 1.34533799 1.66650069 
            1.9879328 2.3096242 2.63156462 2.95374441 3.27615285 3.59878016 3.92161584 
            4.24464989 4.56787109 4.89127016 5.21483612 5.53855896 5.86242723 6.18643141 
            6.51056051 6.83480453 7.15915203 7.48359251 7.80811644 8.13271141 8.45736885 
            8.78207684 9.10682392 9.43160152 9.75639725 10.0812016 10.406002 10.7307901 
            11.0555544 11.3802834 11.7049665 12.0295944 12.3541555 12.6786385 13.0030346 
            13.3273315 13.6515188 13.9755869 14.2995243 14.6233215 14.9469671 15.2704506 
            15.5937624 15.9168911 16.2398281 16.562561 16.8850784 17.2073746 17.5294361 
            17.8512535 18.1728172 18.4941158 18.8151398 19.1358795 19.4563255 19.7764664 
            20.0962944 20.4157982 20.7349701 21.0537987 21.3722744 21.6903896 22.008131 
            22.3254948 22.6424656 22.9590397 23.2752056 23.5909519 23.9062748 24.2211609 
            24.5356045 24.8495941 25.1631222 25.476181 25.7887611 26.1008549 26.4124527 
            26.7235489 27.034132 -8.49762344 -8.18831348 -7.87845135 -7.56804323 
            -7.25709724 -6.94562197 -6.63362503 -6.32111502 -6.00809956 -5.69458771 
            -5.38058758 -5.06610775 -4.75115681 -4.43574333 -4.11987638 -3.80356503 
            -3.4868176 -3.16964364 -2.85205197 -2.5340519 -2.2156527 -1.8968637 -1.57769418 
            -1.2581538 -0.938252091 -0.61799854 -0.297402918 0.0235250238 0.344775498 
            0.666338623 0.988204479 1.31036305 1.63280439 1.95551825 2.2784946 2.60172319 
            2.92519379 3.24889588 3.57281947 3.89695406 4.22128916 4.54581451 4.87051916 
            5.19539309 5.52042532 5.84560537 6.17092228 6.4963665 6.82192612 7.14759064 
            7.47335005 7.79919338 8.12510872 8.451087 8.77711678 9.10318661 9.429286 
            9.75540543 10.0815315 10.4076557 10.7337666 11.0598526 11.3859034 11.7119093 
            12.0378571 12.3637381 12.6895409 13.015254 13.340868 13.6663704 13.9917526 
            14.3170023 14.6421099 14.9670649 15.2918549 15.6164713 15.9409027 16.2651386 
            16.5891685 16.9129829 17.2365704 17.5599213 17.8830261 18.2058716 18.52845 
            18.8507519 19.1727657 19.494482 19.8158894 20.1369801 20.4577427 20.7781677 
            21.0982475 21.4179707 21.7373257 22.0563068 22.3749008 22.6931019 23.0108986 
            23.3282833 23.6452446 23.9617767 24.2778664 24.5935078 24.9086914 25.2234077 
            25.5376492 25.8514061 26.164669 26.4774342 26.7896881 27.1014252 -8.57059383 
            -8.26015091 -7.9491477 -7.63759327 -7.32549524 -7.01286077 -6.6996994 
            -6.38601828 -6.07182646 -5.75713205 -5.44194412 -5.12627029 -4.81012011 
            -4.49350214 -4.17642546 -3.8588984 -3.54093075 -3.22253108 -2.90370917 
            -2.58447361 -2.2648344 -1.94480062 -1.6243819 -1.30358779 -0.982428014 
            -0.660912216 -0.339050233 -0.0168518983 0.305672854 0.628514051 0.951661646 
            1.27510548 1.59883547 1.92284131 2.24711275 2.57163978 2.89641142 3.22141767 
            3.54664803 3.87209177 4.19773865 4.52357817 4.84959888 5.17579126 5.50214338 
            5.82864571 6.15528679 6.48205614 6.80894232 7.13593531 7.46302414 7.79019737 
            8.11744404 8.4447546 8.77211666 9.09951973 9.42695236 9.75440502 10.0818653 
            10.4093227 10.7367668 11.064187 11.3915701 11.7189083 12.0461874 12.3733997 
            12.700532 13.0275736 13.3545151 13.681344 14.00805 14.3346233 14.6610518 
            14.9873257 15.3134336 15.6393652 15.9651098 16.2906551 16.6159954 16.9411144 
            17.2660046 17.5906544 17.9150562 18.2391949 18.5630646 18.886652 19.2099495 
            19.5329456 19.855629 20.1779919 20.5000248 20.8217144 21.1430531 21.4640312 
            21.7846394 22.104866 22.4247036 22.7441425 23.0631733 23.3817844 23.6999683 
            24.0177174 24.3350201 24.6518688 24.9682541 25.2841682 25.5995998 25.9145412 
            26.2289867 26.542923 26.8563461 27.1692448 -8.64413166 -8.33254719 -8.02039623 
            -7.70768738 -7.39442825 -7.08062744 -6.76629257 -6.4514327 -6.13605595 
            -5.82017088 -5.50378561 -5.18690968 -4.86955166 -4.55171967 -4.23342419 
            -3.91467285 -3.59547544 -3.27584124 -2.95577931 -2.63529944 -2.31441045 
            -1.99312258 -1.67144501 -1.34938753 -1.02696002 -0.704172134 -0.381033897 
            -0.0575552471 0.266253769 0.590383053 0.914822459 1.23956168 1.56459057 
            1.88989878 2.2154758 2.54131126 2.86739469 3.19371533 3.52026296 3.84702659 
            4.17399597 4.50115967 4.8285079 5.15602875 5.4837122 5.81154728 6.13952303 
            6.46762848 6.79585266 7.12418413 7.45261288 7.78112745 8.10971642 8.43836975 
            8.76707458 9.09582138 9.42459965 9.75339603 10.082202 10.4110041 10.7397928 
            11.0685558 11.3972836 11.7259645 12.0545864 12.3831396 12.7116127 13.0399942 
            13.3682737 13.6964397 14.0244818 14.3523884 14.6801491 15.0077524 15.3351889 
            15.662446 15.9895134 16.3163815 16.6430378 16.9694748 17.2956772 17.6216373 
            17.9473457 18.272789 18.5979595 18.9228439 19.2474346 19.5717201 19.8956909 
            20.2193356 20.5426464 20.8656101 21.1882191 21.5104637 21.8323326 22.1538162 
            22.474905 22.7955914 23.1158638 23.4357128 23.7551289 24.0741043 24.3926296 
            24.7106934 25.0282898 25.3454094 25.6620407 25.9781761 26.293808 26.6089287 
            26.9235268 27.2375946 -8.7182436 -8.40550995 -8.09220314 -7.77833176 
            -7.4639039 -7.14892769 -6.83341169 -6.51736403 -6.20079374 -5.88370895 
            -5.56611824 -5.24803114 -4.92945623 -4.61040211 -4.29087782 -3.97089338 
            -3.65045714 -3.32957888 -3.00826788 -2.68653369 -2.36438584 -2.04183412 
            -1.71888804 -1.3955574 -1.07185221 -0.747782409 -0.423357964 -0.0985889807 
            0.226514399 0.551941931 0.877683401 1.20372832 1.53006649 1.85668731 
            2.18358016 2.5107348 2.83814049 3.16578627 3.49366164 3.82175589 4.15005827 
            4.47855759 4.80724335 5.13610411 5.46512985 5.79430866 6.12362957 6.45308208 
            6.78265476 7.11233664 7.44211626 7.77198267 8.1019249 8.4319315 8.7619915 
            9.09209347 9.42222691 9.75237942 10.0825405 10.4126987 10.7428427 11.0729618 
            11.4030437 11.733079 12.063055 12.3929605 12.722785 13.0525169 13.3821459 
            13.7116594 14.041048 14.3702993 14.6994028 15.028347 15.3571224 15.6857157 
            16.0141182 16.3423176 16.6703033 16.9980659 17.3255939 17.652874 17.9799004 
            18.3066578 18.6331387 18.9593315 19.2852268 19.6108112 19.936079 20.2610168 
            20.5856133 20.9098625 21.2337513 21.5572701 21.8804092 22.2031593 22.5255108 
            22.8474541 23.1689777 23.4900723 23.8107319 24.1309433 24.4506989 24.769989 
            25.0888042 25.4071369 25.7249756 26.0423145 26.3591442 26.6754532 26.9912357 
            27.3064842 -8.79293633 -8.47904491 -8.16457367 -7.84953213 -7.53392744 
            -7.21776772 -6.90106201 -6.58381844 -6.26604557 -5.94775248 -5.62894821 
            -5.30964041 -4.98983955 -4.66955376 -4.34879255 -4.02756548 -3.70588112 
            -3.38374925 -3.06117988 -2.73818183 -2.41476536 -2.09094 -1.76671541 
            -1.44210184 -1.11710918 -0.791747332 -0.466026604 -0.139957115 0.186450854 
            0.513186932 0.840240777 1.16760182 1.49525964 1.82320368 2.15142322 2.47990751 
            2.80864573 3.1376276 3.46684146 3.79627705 4.12592316 4.45576906 4.78580332 
            5.11601543 5.44639349 5.77692699 6.10760498 6.43841553 6.76934767 7.10039043 
            7.43153286 7.76276255 8.09406948 8.42544079 8.75686646 9.08833504 9.41983509 
            9.75135422 10.0828819 10.4144077 10.7459183 11.077404 11.4088526 11.7402525 
            12.0715933 12.4028625 12.7340498 13.0651436 13.3961325 13.727006 14.0577517 
            14.3883581 14.7188158 15.0491123 15.3792362 15.709178 16.0389252 16.3684673 
            16.697794 17.0268936 17.3557549 17.6843662 18.0127201 18.3408031 18.6686058 
            18.9961166 19.3233261 19.6502209 19.9767952 20.3030357 20.628931 20.9544735 
            21.2796516 21.6044559 21.9288769 22.252903 22.5765247 22.8997345 23.2225189 
            23.5448704 23.8667793 24.1882362 24.5092316 24.8297558 25.1498013 25.4693565 
            25.788414 26.1069641 26.4249973 26.742506 27.0594826 27.3759155 -8.86821651 
            -8.55315971 -8.2375164 -7.92129612 -7.60450554 -7.2871542 -6.9692502 
            -6.65080166 -6.3318181 -6.01230812 -5.69228029 -5.37174368 -5.05070782 
            -4.72918129 -4.40717363 -4.08469391 -3.76175237 -3.43835759 -3.11451983 
            -2.79024863 -2.46555352 -2.14044476 -1.81493211 -1.48902547 -1.1627351 
            -0.836071253 -0.509043992 -0.181663722 0.146059155 0.47411418 0.80249089 
            1.13117862 1.46016669 1.78944445 2.11900115 2.44882607 2.77890801 3.10923624 
            3.43980002 3.77058792 4.10158873 4.43279219 4.76418591 5.09575987 5.42750216 
            5.7594018 6.09144735 6.42362738 6.75593042 7.08834553 7.42086124 7.75346565 
            8.08614826 8.41889572 8.75169849 9.08454514 9.41742229 9.75032043 10.0832272 
            10.4161301 10.7490196 11.0818825 11.4147081 11.7474852 12.0802021 12.4128466 
            12.7454081 13.0778751 13.4102354 13.7424793 14.0745926 14.4065666 14.738389 
            15.0700483 15.4015341 15.7328339 16.0639381 16.3948326 16.7255096 17.0559578 
            17.3861637 17.7161198 18.0458107 18.3752308 18.7043648 19.0332031 19.3617363 
            19.6899548 20.0178452 20.3453979 20.6726017 20.9994488 21.3259277 21.6520271 
            21.9777374 22.303051 22.6279526 22.9524384 23.2764931 23.600111 23.9232807 
            24.2459927 24.5682373 24.8900051 25.2112885 25.5320759 25.8523579 26.1721287 
            26.4913769 26.8100929 27.1282711 27.4459 -8.94409084 -8.62786007 -8.31103706 
            -7.99362898 -7.67564487 -7.35709333 -7.03798199 -6.71832037 -6.39811707 
            -6.07738113 -5.75612116 -5.43434668 -5.11206627 -4.78928995 -4.46602631 
            -4.14228535 -3.81807637 -3.49340916 -3.16829348 -2.84273911 -2.51675582 
            -2.19035363 -1.86354256 -1.53633285 -1.20873475 -0.880758464 -0.552414358 
            -0.223712966 0.105335295 0.434719801 0.764429927 1.09445488 1.42478406 
            1.75540638 2.0863111 2.41748738 2.74892402 3.0806098 3.412534 3.74468517 
            4.07705212 4.4096241 4.7423892 5.07533598 5.40845346 5.74173021 6.07515478 
            6.40871572 6.74240112 7.07620001 7.41010046 7.74409151 8.07816029 8.4122963 
            8.74648857 9.08072281 9.41499043 9.74927807 10.0835743 10.4178677 10.7521467 
            11.0863991 11.4206142 11.7547789 12.0888834 12.4229145 12.7568617 13.0907125 
            13.4244566 13.7580814 14.0915747 14.4249268 14.7581263 15.0911598 15.424017 
            15.7566862 16.0891571 16.4214172 16.753458 17.0852642 17.4168262 17.7481346 
            18.0791759 18.4099407 18.7404175 19.0705967 19.400465 19.7300129 20.0592308 
            20.3881073 20.7166309 21.0447941 21.3725815 21.6999874 22.0269985 22.3536072 
            22.6798 23.0055714 23.3309059 23.6557999 23.980238 24.3042145 24.627718 
            24.9507389 25.2732697 25.5952969 25.9168167 26.2378159 26.5582867 26.8782196 
            27.197607 27.5164394 -9.02056599 -8.70315361 -8.38514233 -8.06653881 
            -7.74735212 -7.42759132 -7.107265 -6.78638124 -6.46494913 -6.14297819 
            -5.82047701 -5.49745512 -5.17392111 -4.84988546 -4.52535629 -4.20034456 
            -3.87485886 -3.54890943 -3.22250605 -2.89565849 -2.56837678 -2.24067116 
            -1.91255176 -1.58402872 -1.25511253 -0.925813496 -0.596142173 -0.266109049 
            0.0642751679 0.394999802 0.726054072 1.05742717 1.38910806 1.72108591 
            2.05334973 2.38588834 2.7186904 3.05174518 3.385041 3.71856689 4.05231142 
            4.38626289 4.72040987 5.05474138 5.38924599 5.72391129 6.05872631 6.39367962 
            6.72875881 7.06395292 7.39925003 7.73463821 8.07010651 8.40564156 8.74123383 
            9.07686901 9.41253757 9.74822712 10.0839243 10.4196196 10.7552996 11.0909529 
            11.426569 11.7621336 12.0976372 12.4330664 12.7684107 13.1036577 13.438796 
            13.7738132 14.1086988 14.4434404 14.7780275 15.1124468 15.4466877 15.7807379 
            16.1145878 16.448225 16.7816372 17.1148129 17.4477425 17.7804146 18.1128178 
            18.4449387 18.7767696 19.1082993 19.4395142 19.7704048 20.1009598 20.4311695 
            20.7610245 21.0905094 21.4196186 21.7483406 22.0766621 22.4045773 22.7320709 
            23.0591373 23.3857632 23.7119408 24.0376606 24.3629093 24.6876812 25.0119648 
            25.3357506 25.6590309 25.9817924 26.3040314 26.6257324 26.9468918 27.267498 
            27.5875435 -9.09764957 -8.77904701 -8.45983887 -8.14003181 -7.81963396 
            -7.4986558 -7.17710447 -6.85499001 -6.5323205 -6.20910501 -5.88535357 
            -5.56107473 -5.23627853 -4.91097355 -4.58516979 -4.25887728 -3.93210506 
            -3.60486364 -3.27716255 -2.9490118 -2.62042189 -2.29140258 -1.96196449 
            -1.63211775 -1.30187309 -0.971240819 -0.640231669 -0.308856279 0.0228746161 
            0.35495013 0.687359393 1.02009141 1.35313523 1.68647957 2.02011347 2.3540256 
            2.68820453 3.02263927 3.35731816 3.69222975 4.02736282 4.36270571 4.69824648 
            5.03397417 5.36987686 5.70594263 6.04216003 6.37851667 6.71500158 7.05160284 
            7.38830805 7.72510576 8.06198406 8.3989315 8.73593521 9.07298279 9.4100647 
            9.74716663 10.0842781 10.4213858 10.7584791 11.0955458 11.4325733 11.7695503 
            12.1064644 12.4433041 12.780057 13.1167116 13.4532557 13.7896786 14.125967 
            14.4621096 14.7980957 15.1339121 15.4695482 15.8049908 16.1402302 16.4752541 
            16.810051 17.1446095 17.4789181 17.8129654 18.1467381 18.4802303 18.8134251 
            19.1463146 19.4788857 19.8111305 20.143034 20.4745884 20.8057823 21.1366043 
            21.4670448 21.7970924 22.1267357 22.455965 22.784771 23.113142 23.4410706 
            23.7685432 24.0955505 24.4220848 24.7481327 25.0736885 25.3987408 25.72328 
            26.0472965 26.3707809 26.6937237 27.0161171 27.3379517 27.6592178 -9.17534828 
            -8.8555479 -8.53513336 -8.21411419 -7.89249706 -7.57029247 -7.24750805 
            -6.92415333 -6.60023689 -6.27576876 -5.9507575 -5.62521267 -5.29914379 
            -4.97256088 -4.64547253 -4.31788921 -3.98982096 -3.66127729 -3.33226848 
            -3.00280476 -2.67289591 -2.3425529 -2.01178575 -1.68060493 -1.3490212 
            -1.01704514 -0.684687436 -0.35195896 -0.0188705865 0.314566731 0.648341954 
            0.982443988 1.31686163 1.65158367 1.98659885 2.32189584 2.65746307 2.99328899 
            3.32936239 3.66567159 4.0022049 4.33895063 4.67589664 5.01303196 5.35034466 
            5.68782234 6.02545357 6.36322641 6.70112848 7.03914833 7.37727356 7.71549273 
            8.05379391 8.39216328 8.73059082 9.06906414 9.40757084 9.74609756 10.0846348 
            10.4231682 10.7616863 11.1001768 11.4386292 11.777029 12.115366 12.4536276 
            12.7918015 13.1298752 13.4678383 13.8056774 14.1433802 14.4809361 14.8183327 
            15.1555586 15.4926004 15.8294477 16.16609 16.502512 16.8387051 17.1746559 
            17.5103531 17.845787 18.1809444 18.5158138 18.8503857 19.1846466 19.5185871 
            19.8521957 20.1854591 20.5183697 20.850914 21.1830807 21.5148621 21.8462467 
            22.1772213 22.5077782 22.8379059 23.167593 23.49683 23.8256073 24.1539154 
            24.4817429 24.8090782 25.1359158 25.462244 25.7880516 26.1133308 26.4380722 
            26.7622643 27.0859013 27.4089718 27.7314682 -9.25366974 -8.93266296 -8.61103439 
            -8.28879356 -7.96594858 -7.64250851 -7.31848192 -6.99387789 -6.66870594 
            -6.34297514 -6.01669502 -5.68987465 -5.36252403 -5.03465271 -4.70627022 
            -4.37738657 -4.04801178 -3.7181561 -3.38782954 -3.05704236 -2.72580481 
            -2.39412737 -2.06202054 -1.72949517 -1.39656174 -1.06323111 -0.729514003 
            -0.395421594 -0.0609647408 0.273845404 0.608997703 0.944480896 1.28028369 
            1.61639476 1.95280254 2.28949571 2.62646246 2.96369147 3.30117106 3.63888907 
            3.9768343 4.31499434 4.65335798 4.99191284 5.33064699 5.66954851 6.00860548 
            6.34780598 6.6871376 7.02658844 7.36614561 7.70579815 8.04553318 8.38533878 
            8.72520256 9.06511211 9.40505505 9.74501991 10.0849934 10.4249649 10.7649202 
            11.1048479 11.4447365 11.7845716 12.1243439 12.4640388 12.8036451 13.1431513 
            13.4825439 13.8218117 14.1609411 14.4999228 14.8387413 15.1773882 15.5158482 
            15.8541117 16.1921654 16.5299988 16.8675995 17.2049541 17.5420551 17.8788853 
            18.2154369 18.5516987 18.8876572 19.2233009 19.5586205 19.8936024 20.2282372 
            20.5625134 20.8964195 21.2299461 21.5630779 21.8958092 22.2281265 22.5600204 
            22.8914795 23.2224922 23.553051 23.8831444 24.2127609 24.5418911 24.8705254 
            25.1986523 25.5262642 25.8533516 26.179903 26.5059109 26.8313618 27.1562519 
            27.4805679 27.8043022 -9.33262062 -9.01039886 -8.68754768 -8.36407757 
            -8.03999519 -7.71531057 -7.39003277 -7.06417084 -6.73773384 -6.41073132 
            -6.08317232 -5.75506735 -5.42642498 -5.09725571 -4.76756907 -4.43737507 
            -4.10668421 -3.77550602 -3.44385123 -3.11173034 -2.77915335 -2.44613099 
            -2.11267424 -1.77879333 -1.44449949 -1.10980332 -0.77471602 -0.439248621 
            -0.103412218 0.232781932 0.569322526 0.906198204 1.24339759 1.58090901 
            1.91872096 2.25682187 2.59520006 2.93384361 3.27274084 3.61187983 3.95124865 
            4.29083538 4.63062763 4.97061396 5.31078196 5.65111971 5.99161434 6.33225441 
            6.67302752 7.01392126 7.35492325 7.69602108 8.03720284 8.37845516 8.71976757 
            9.06112576 9.40251827 9.74393272 10.0853558 10.4267769 10.7681818 11.1095581 
            11.4508953 11.7921791 12.1333981 12.4745388 12.8155909 13.1565399 13.4973745 
            13.8380833 14.1786518 14.5190697 14.8593235 15.1994028 15.5392933 15.8789845 
            16.2184639 16.5577183 16.8967381 17.2355099 17.5740223 17.9122639 18.2502213 
            18.5878849 18.9252415 19.2622814 19.5989895 19.93536 20.2713757 20.607029 
            20.9423084 21.2772007 21.6116982 21.9457855 22.2794571 22.6126976 22.9454975 
            23.2778492 23.6097374 23.9411545 24.2720909 24.6025352 24.932476 25.2619057 
            25.5908127 25.9191875 26.2470207 26.5743027 26.9010239 27.2271748 27.5527458 
            27.8777275 -9.41220951 -9.08876324 -8.76468182 -8.43997192 -8.11464405 
            -7.7887063 -7.46216822 -7.13503885 -6.80732727 -6.47904348 -6.15019655 
            -5.82079649 -5.49085283 -5.1603756 -4.82937479 -4.49786091 -4.16584301 
            -3.83333254 -3.50033927 -3.16687393 -2.83294725 -2.49856949 -2.1637516 
            -1.82850468 -1.49283934 -1.15676689 -0.820298195 -0.483444631 -0.14621745 
            0.191371992 0.529312313 0.867591918 1.20619929 1.54512274 1.88435054 
            2.22387099 2.56367207 2.90374207 3.24406886 3.5846405 3.92544508 4.26646996 
            4.60770369 4.94913387 5.29074764 5.63253307 5.97447824 6.31657028 6.65879679 
            7.00114584 7.34360456 7.68616009 8.02880096 8.37151337 8.71428585 9.05710602 
            9.39995956 9.742836 10.085722 10.4286041 10.771471 11.1143093 11.4571066 
            11.7998514 12.1425295 12.4851294 12.8276377 13.170043 13.512332 13.8544931 
            14.1965132 14.5383806 14.8800812 15.2216053 15.5629387 15.9040689 16.2449856 
            16.5856743 16.9261265 17.266325 17.6062622 17.9459248 18.2853012 18.6243782 
            18.9631443 19.30159 19.6397018 19.9774666 20.3148766 20.6519184 20.9885807 
            21.3248539 21.6607227 21.9961815 22.3312149 22.6658134 22.9999676 23.3336658 
            23.6668949 23.999649 24.3319149 24.663681 24.9949398 25.3256798 25.6558914 
            25.9855652 26.3146896 26.6432571 26.9712543 27.2986774 27.6255112 27.9517517 
            -9.49244308 -9.16776466 -8.84244251 -8.51648617 -8.18990326 -7.86270285 
            -7.53489494 -7.20648861 -6.87749338 -6.54791832 -6.21777391 -5.88706923 
            -5.55581427 -5.22401953 -4.89169455 -4.55884981 -4.22549534 -3.89164162 
            -3.55729961 -3.22247934 -2.88719201 -2.55144811 -2.21525836 -1.87863421 
            -1.54158652 -1.20412648 -0.866265297 -0.528014302 -0.189384982 0.14961122 
            0.48896271 0.828657806 1.16868484 1.50903201 1.84968734 2.19063902 2.53187513 
            2.87338352 3.21515203 3.55716848 3.89942074 4.24189663 4.58458328 4.92746925 
            5.27054119 5.61378717 5.95719481 6.30075121 6.64444399 6.98826075 7.33218861 
            7.67621469 8.02032661 8.36451149 8.7087574 9.05305099 9.39737892 9.74172974 
            10.0860901 10.4304476 10.7747889 11.1191006 11.4633722 11.8075895 12.1517391 
            12.4958105 12.8397884 13.1836624 13.5274181 13.8710451 14.2145281 14.5578566 
            14.9010172 15.2439976 15.5867853 15.929369 16.2717342 16.6138706 16.9557648 
            17.2974033 17.6387768 17.9798737 18.3206787 18.6611805 19.0013695 19.3412323 
            19.6807575 20.0199318 20.3587456 20.6971874 21.0352459 21.3729076 21.7101631 
            22.0470009 22.3834076 22.7193756 23.0548935 23.3899479 23.7245312 24.05863 
            24.3922348 24.7253361 25.0579224 25.3899841 25.7215099 26.0524902 26.3829174 
            26.7127781 27.0420647 27.3707657 27.6988735 28.0263786 -9.57332897 -9.24740982 
            -8.92083931 -8.59362602 -8.26577854 -7.93730688 -7.6082201 -7.27852774 
            -6.94823885 -6.61736345 -6.28591108 -5.95389223 -5.62131643 -5.28819323 
            -4.95453405 -4.62034798 -4.28564644 -3.95043945 -3.61473775 -3.27855206 
            -2.94189334 -2.60477209 -2.26719975 -1.92918742 -1.59074616 -1.2518872 
            -0.912622154 -0.572962344 -0.23291938 0.107495129 0.448269457 0.789391816 
            1.13085032 1.472633 1.8147279 2.15712309 2.49980593 2.84276485 3.18598723 
            3.52946067 3.873173 4.21711159 4.56126451 4.90561819 5.25016117 5.5948801 
            5.93976259 6.28479624 6.62996769 6.97526455 7.32067394 7.66618299 8.01177979 
            8.35744953 8.70318127 9.04896069 9.39477634 9.74061489 10.086462 10.4323063 
            10.7781353 11.1239338 11.4696913 11.8153944 12.1610289 12.5065832 12.8520441 
            13.1973991 13.542635 13.8877382 14.2326984 14.5775003 14.9221334 15.2665834 
            15.6108379 15.9548855 16.2987118 16.6423073 16.9856567 17.3287487 17.6715698 
            18.0141106 18.3563576 18.6982975 19.0399208 19.3812122 19.7221622 20.0627575 
            20.4029884 20.7428417 21.082304 21.4213676 21.7600193 22.0982475 22.4360409 
            22.7733898 23.110281 23.4467049 23.78265 24.1181049 24.4530621 24.7875061 
            25.1214294 25.4548225 25.787674 26.1199722 26.4517097 26.7828732 27.1134567 
            27.443449 27.7728405 28.1016197 -9.65487576 -9.32770634 -8.99987793 -8.67139912 
            -8.34227848 -8.01252651 -7.68215084 -7.35116291 -7.01957083 -6.68738508 
            -6.35461569 -6.02127218 -5.68736506 -5.35290384 -5.01789951 -4.68236256 
            -4.34630299 -4.00973225 -3.67266011 -3.33509803 -2.99705672 -2.6585474 
            -2.31958127 -1.98016942 -1.64032328 -1.30005419 -0.959373772 -0.618293583 
            -0.276825309 0.0650192201 0.407228172 0.749789596 1.09269154 1.43592179 
            1.77946842 2.12331891 2.46746111 2.81188273 3.15657115 3.5015142 3.846699 
            4.19211292 4.53774405 4.88357878 5.22960472 5.57580948 5.9221797 6.26870251 
            6.61536551 6.96215534 7.30905962 7.65606451 8.00315762 8.35032654 8.6975565 
            9.04483604 9.39215088 9.73948956 10.0868368 10.4341822 10.7815104 11.128809 
            11.4760656 11.823267 12.1703987 12.5174494 12.8644056 13.2112541 13.5579824 
            13.9045773 14.2510252 14.5973148 14.9434309 15.2893639 15.6350975 15.9806223 
            16.325922 16.6709881 17.0158062 17.360363 17.7046452 18.0486431 18.3923435 
            18.735733 19.0788021 19.4215336 19.7639217 20.1059494 20.447607 20.7888832 
            21.1297646 21.4702415 21.8103008 22.149931 22.4891205 22.8278599 23.1661358 
            23.5039387 23.8412571 24.1780815 24.5143967 24.8501968 25.1854687 25.5202026 
            25.8543892 26.188015 26.5210724 26.8535519 27.185442 27.5167332 27.8474159 
            28.1774807 -9.73709106 -9.4086628 -9.07956791 -8.74981403 -8.41941071 
            -8.08836842 -7.75669527 -7.42440128 -7.09149647 -6.75799084 -6.42389393 
            -6.08921576 -5.75396729 -5.41815758 -5.08179855 -4.74489927 -4.40747166 
            -4.06952572 -3.73107243 -3.39212298 -3.05268836 -2.71277976 -2.37240839 
            -2.03158593 -1.69032335 -1.34863257 -1.00652516 -0.664012849 -0.321107566 
            0.0221788697 0.365834415 0.709846973 1.05420434 1.39889443 1.74390483 
            2.08922315 2.43483686 2.78073359 3.12690067 3.47332549 3.8199954 4.16689777 
            4.51401949 4.86134768 5.20886993 5.55657291 5.90444374 6.25246906 6.60063648 
            6.94893265 7.29734421 7.64585829 7.99446154 8.3431406 8.69188309 9.04067421 
            9.38950253 9.73835468 10.0872154 10.4360733 10.784915 11.1337271 11.4824953 
            11.8312073 12.1798506 12.5284109 12.8768749 13.2252302 13.5734644 13.9215622 
            14.2695122 14.6173 14.9649143 15.3123417 15.6595678 16.0065823 16.3533688 
            16.6999187 17.0462151 17.3922501 17.7380066 18.0834732 18.4286404 18.7734909 
            19.1180172 19.462204 19.8060379 20.1495113 20.492609 20.8353195 21.1776295 
            21.5195312 21.8610096 22.2020531 22.5426521 22.8827934 23.2224655 23.5616589 
            23.900362 24.2385635 24.5762501 24.9134159 25.2500458 25.586132 25.9216614 
            26.2566261 26.5910149 26.924818 27.2580242 27.5906258 27.9226093 28.2539692 
            -9.81998253 -9.49028683 -9.15991592 -8.82887745 -8.49718285 -8.1648407 
            -7.83186007 -7.49825096 -7.16402388 -6.82918787 -6.49375343 -6.15773058 
            -5.8211298 -5.48396158 -5.14623642 -4.80796528 -4.46915817 -4.12982655 
            -3.78998113 -3.44963312 -3.10879397 -2.76747489 -2.42568707 -2.08344197 
            -1.74075174 -1.39762759 -1.05408144 -0.710125208 -0.365770936 -0.021030603 
            0.324083596 0.669559419 1.01538455 1.36154664 1.7080332 2.05483174 2.40192962 
            2.74931407 3.09697247 3.44489193 3.79305959 4.1414628 4.49008846 4.83892298 
            5.18795443 5.5371685 5.88655281 6.236094 6.58577919 6.93559408 7.28552628 
            7.63556242 7.98568869 8.33589268 8.68615913 9.03647709 9.38683128 9.73720932 
            10.0875969 10.4379816 10.7883492 11.1386871 11.4889812 11.8392181 12.1893845 
            12.5394678 12.8894539 13.2393293 13.5890808 13.938695 14.2881594 14.6374607 
            14.9865847 15.3355198 15.6842518 16.0327682 16.3810539 16.7290993 17.0768909 
            17.4244137 17.771656 18.1186066 18.46525 18.8115749 19.1575718 19.5032234 
            19.8485203 20.193449 20.5379963 20.8821545 21.2259064 21.5692425 21.9121513 
            22.2546215 22.5966396 22.9381943 23.279274 23.6198692 23.9599667 24.2995567 
            24.638628 24.977169 25.3151684 25.6526165 25.989502 26.3258152 26.6615448 
            26.9966812 27.3312149 27.6651325 27.9984303 28.3310928 -9.90355873 -9.57258606 
            -9.2409296 -8.9085989 -8.57560253 -8.24195099 -7.90765333 -7.5727191 
            -7.23715925 -6.90098286 -6.56420088 -6.22682333 -5.88886023 -5.55032253 
            -5.21122122 -4.8715663 -4.53136921 -4.19064093 -3.84939218 -3.50763464 
            -3.16537976 -2.82263851 -2.47942257 -2.13574386 -1.79161382 -1.44704449 
            -1.1020478 -0.756635666 -0.410820335 -0.0646139607 0.281971127 0.628922582 
            0.97622782 1.32387447 1.67184973 2.02014112 2.36873555 2.71762061 3.06678319 
            3.41621017 3.76588869 4.11580563 4.46594763 4.8163023 5.16685534 5.51759434 
            5.86850548 6.21957541 6.57079077 6.92213869 7.27360487 7.62517643 7.97683907 
            8.3285799 8.68038559 9.03224277 9.3841362 9.73605442 10.0879822 10.4399071 
            10.7918139 11.1436911 11.4955244 11.8472996 12.1990032 12.550622 12.9021425 
            13.2535505 13.6048346 13.9559784 14.3069706 14.6577978 15.0084457 15.358901 
            15.7091503 16.0591812 16.4089813 16.7585354 17.107832 17.4568577 17.8055992 
            18.1540432 18.5021782 18.8499908 19.1974678 19.5445976 19.8913689 20.2377644 
            20.5837784 20.9293938 21.2745991 21.6193829 21.9637337 22.3076401 22.6510887 
            22.9940701 23.3365688 23.6785755 24.0200806 24.3610706 24.7015343 25.0414619 
            25.3808422 25.7196617 26.0579147 26.395586 26.7326679 27.0691471 27.4050159 
            27.7402649 28.0748825 28.4088573 -9.98782825 -9.65557003 -9.32261848 
            -8.98898506 -8.65467834 -8.31970692 -7.9840827 -7.6478138 -7.3109107 
            -6.97338438 -6.63524437 -6.29650116 -5.95716524 -5.61724758 -5.27675867 
            -4.93570995 -4.59411144 -4.25197554 -3.90931249 -3.56613398 -3.22245145 
            -2.87827659 -2.53362131 -2.18849683 -1.84291542 -1.49688888 -1.15042949 
            -0.803549409 -0.456260771 -0.108576059 0.239492312 0.587931812 0.936729789 
            1.28587353 1.63535035 1.98514724 2.33525133 2.68564963 3.03632927 3.38727665 
            3.73847914 4.0899229 4.44159508 4.7934823 5.14557076 5.49784756 5.85029888 
            6.2029109 6.55567074 6.90856457 7.26157808 7.61469841 7.96791172 8.32120419 
            8.6745615 9.02797031 9.38141823 9.73488903 10.0883703 10.4418488 10.79531 
            11.1487398 11.5021248 11.8554516 12.2087059 12.5618744 12.9149427 13.2678986 
            13.6207266 13.9734144 14.3259478 14.6783133 15.0304976 15.3824873 15.7342682 
            16.0858288 16.4371529 16.788229 17.1390457 17.4895859 17.839838 18.1897907 
            18.5394287 18.8887405 19.2377129 19.5863342 19.9345894 20.2824669 20.6299553 
            20.9770412 21.3237133 21.6699562 22.0157623 22.3611164 22.7060089 23.0504246 
            23.3943558 23.7377872 24.0807095 24.423111 24.7649784 25.1063042 25.447073 
            25.7872791 26.1269073 26.4659481 26.80439 27.1422253 27.4794407 27.8160286 
            28.1519756 28.4872742 -10.0727997 -9.73924541 -9.40499115 -9.07004452 
            -8.73441696 -8.39811802 -8.06115627 -7.72354221 -7.38528633 -7.04639912 
            -6.70689058 -6.36677122 -6.026052 -5.6847434 -5.34285688 -5.00040245 
            -4.65739202 -4.31383705 -3.96974802 -3.62513709 -3.28001571 -2.93439555 
            -2.58828878 -2.24170685 -1.8946619 -1.54716623 -1.19923198 -0.850871623 
            -0.502097368 -0.152921826 0.196642369 0.54658252 0.896885872 1.24753964 
            1.59853065 1.94984603 2.30147266 2.65339756 3.00560713 3.35808849 3.71082783 
            4.06381226 4.41702747 4.77046108 5.1240983 5.47792625 5.83193111 6.18609953 
            6.54041672 6.8948698 7.24944496 7.60412788 7.95890474 8.31376171 8.66868496 
            9.02366066 9.37867451 9.73371315 10.0887623 10.4438076 10.7988358 11.1538324 
            11.5087843 11.8636761 12.2184944 12.573226 12.9278564 13.2823725 13.6367598 
            13.991004 14.3450928 14.6990108 15.0527449 15.4062824 15.7596083 16.112709 
            16.4655724 16.8181858 17.1705322 17.5226021 17.8743782 18.2258511 18.5770054 
            18.9278297 19.2783108 19.6284332 19.9781876 20.3275585 20.6765347 21.0251045 
            21.3732529 21.7209702 22.0682411 22.4150562 22.7614021 23.1072674 23.4526386 
            23.7975063 24.1418591 24.4856815 24.8289661 25.1716995 25.5138721 25.8554707 
            26.1964855 26.5369072 26.8767223 27.2159214 27.554493 27.8924294 28.2297192 
            28.5663509 -10.1584806 -9.82362175 -9.48805428 -9.15178585 -8.81482792 
            -8.47719002 -8.13888168 -7.79991245 -7.46029377 -7.12003517 -6.77914762 
            -6.4376421 -6.09552813 -5.75281811 -5.40952206 -5.06565142 -4.72121763 
            -4.37623167 -4.03070545 -3.68465066 -3.33807874 -2.99100161 -2.64343119 
            -2.29537964 -1.94685924 -1.59788215 -1.24846077 -0.898607612 -0.548335195 
            -0.197656274 0.153416455 0.504870057 0.856691718 1.20886827 1.56138659 
            1.91423368 2.26739621 2.62086058 2.97461367 3.32864189 3.6829319 4.03746986 
            4.39224243 4.7472353 5.10243511 5.45782852 5.81340075 6.16913843 6.52502728 
            6.88105392 7.2372036 7.59346294 7.94981766 8.30625343 8.66275692 9.01931286 
            9.3759079 9.73252773 10.0891581 10.4457846 10.8023939 11.1589708 11.515502 
            11.871974 12.2283707 12.5846796 12.9408855 13.2969761 13.652935 14.00875 
            14.3644075 14.7198915 15.0751896 15.4302883 15.7851725 16.1398296 16.4942455 
            16.8484058 17.2022972 17.5559082 17.9092236 18.2622299 18.6149139 18.9672642 
            19.3192635 19.6709042 20.0221691 20.373045 20.7235222 21.0735874 21.4232254 
            21.7724266 22.1211777 22.4694653 22.8172779 23.1646023 23.5114288 23.8577442 
            24.2035351 24.5487938 24.8935051 25.2376575 25.5812435 25.9242477 26.2666607 
            26.6084709 26.9496689 27.2902431 27.6301842 27.9694786 28.3081188 28.6460934 
            -10.2448807 -9.90870857 -9.5718174 -9.23421764 -8.8959198 -8.55693245 
            -8.21726704 -7.87693262 -7.53594065 -7.19430065 -6.85202312 -6.50911999 
            -6.16560125 -5.82147837 -5.47676182 -5.13146353 -4.78559494 -4.43916702 
            -4.09219217 -3.74468136 -3.39664698 -3.04810071 -2.69905496 -2.34952164 
            -1.99951339 -1.64904237 -1.29812133 -0.94676286 -0.594979644 -0.2427845 
            0.109809592 0.462789625 0.816142499 1.169855 1.52391398 1.87830591 2.23301744 
            2.58803487 2.94334507 3.29893398 3.65478802 4.01089334 4.36723614 4.72380304 
            5.08057928 5.43755102 5.79470444 6.1520257 6.5095005 6.86711407 7.22485304 
            7.58270311 7.94064951 8.2986784 8.65677547 9.01492596 9.37311554 9.73133087 
            10.0895567 10.4477787 10.8059835 11.164155 11.5222807 11.8803453 12.2383347 
            12.5962353 12.954031 13.3117094 13.6692553 14.0266552 14.383894 14.7409582 
            15.0978346 15.4545078 15.8109636 16.1671906 16.5231705 16.8788948 17.2343464 
            17.5895119 17.9443779 18.2989311 18.6531582 19.0070457 19.3605804 19.713747 
            20.0665359 20.418932 20.7709236 21.1224957 21.4736366 21.8243351 22.1745758 
            22.5243492 22.8736401 23.2224369 23.5707283 23.9185028 24.2657471 24.6124496 
            24.9585991 25.304184 25.6491928 25.9936142 26.3374367 26.6806488 27.023241 
            27.3652 27.7065182 28.0471821 28.3871841 28.726511 -10.3320084 -9.99451256 
            -9.6562891 -9.31734848 -8.97770023 -8.6373539 -8.29632092 -7.9546113 
            -7.61223507 -7.26920271 -6.92552519 -6.58121347 -6.23627853 -5.89073181 
            -5.5445838 -5.19784641 -4.85053158 -4.50264978 -4.15421391 -3.80523562 
            -3.45572686 -3.1056993 -2.75516582 -2.40413857 -2.05262995 -1.70065272 
            -1.34821939 -0.995342851 -0.642035961 -0.28831172 0.065816775 0.420336336 
            0.775233686 1.13049543 1.48610818 1.84205842 2.19833255 2.55491686 2.91179752 
            3.26896071 3.6263926 3.98407936 4.34200668 4.7001605 5.05852699 5.41709185 
            5.77584076 6.1347599 6.49383402 6.85304928 7.21239185 7.57184649 7.93139887 
            8.2910347 8.65073967 9.010499 9.37029839 9.73012352 10.0899591 10.449791 
            10.8096056 11.1693869 11.5291204 11.888793 12.2483892 12.6078939 12.9672947 
            13.3265753 13.6857214 14.0447197 14.4035559 14.7622147 15.1206818 15.4789438 
            15.8369865 16.1947956 16.5523567 16.9096546 17.2666798 17.6234131 17.979845 
            18.3359585 18.6917419 19.0471802 19.4022617 19.7569714 20.1112976 20.4652252 
            20.8187428 21.1718349 21.5244923 21.8766994 22.2284431 22.5797138 22.9304943 
            23.280777 23.6305466 23.9797916 24.3285007 24.6766605 25.0242596 25.3712883 
            25.7177315 26.0635815 26.408823 26.7534485 27.0974445 27.4407997 27.7835064 
            28.1255493 28.4669228 28.8076134 -10.4198732 -10.0810442 -9.74147797 
            -9.40118599 -9.0601778 -8.71846294 -8.37605286 -8.03295612 -7.68918514 
            -7.34474993 -6.99966145 -6.65393019 -6.30756807 -5.96058607 -5.61299515 
            -5.26480722 -4.91603422 -4.56668711 -4.21677876 -3.86632061 -3.51532507 
            -3.16380429 -2.81177068 -2.45923686 -2.10621548 -1.75271916 -1.39876068 
            -1.04435325 -0.68950963 -0.334243208 0.021432871 0.377505213 0.73396039 
            1.09078491 1.44796503 1.80548716 2.16333747 2.52150226 2.87996721 3.23871875 
            3.59774256 3.95702434 4.31655025 4.67630577 5.03627682 5.39644909 5.75680733 
            6.11733818 6.47802639 6.83885813 7.19981766 7.56089163 7.92206478 8.28332233 
            8.64464951 9.00603294 9.36745644 9.72890472 10.0903654 10.4518213 10.8132601 
            11.1746645 11.5360212 11.897316 12.2585335 12.6196585 12.9806776 13.3415747 
            13.7023363 14.0629482 14.4233942 14.7836609 15.1437349 15.5036001 15.8632421 
            16.2226486 16.5818024 16.940691 17.2993011 17.6576195 18.0156269 18.3733158 
            18.730669 19.0876732 19.444315 19.8005791 20.156456 20.5119286 20.8669853 
            21.2216129 21.5757961 21.9295254 22.2827873 22.6355648 22.9878502 23.3396301 
            23.6908894 24.0416183 24.3918018 24.7414322 25.0904922 25.4389744 25.7868652 
            26.1341534 26.4808273 26.8268757 27.172287 27.5170498 27.8611546 28.2045898 
            28.5473442 28.8894081 -10.5084839 -10.1683111 -9.82739353 -9.48574066 
            -9.14336205 -8.80026817 -8.45646954 -8.11197662 -7.76679993 -7.42095089 
            -7.07444 -6.72727823 -6.3794775 -6.03104877 -5.6820035 -5.33235359 -4.9821105 
            -4.63128614 -4.27989292 -3.92794323 -3.57544875 -3.22242212 -2.86887598 
            -2.51482296 -2.16027594 -1.80524755 -1.44975114 -1.09379959 -0.737406254 
            -0.380584329 -0.0233473256 0.33429125 0.692317843 1.05071867 1.40947986 
            1.76858771 2.12802815 2.48778725 2.8478508 3.20820451 3.5688343 3.92972565 
            4.29086447 4.65223598 5.01382542 5.37561893 5.73760176 6.0997591 6.46207571 
            6.82453775 7.18712997 7.54983759 7.91264582 8.27554035 8.63850498 9.00152588 
            9.36458778 9.72767544 10.0907755 10.4538708 10.816947 11.1799908 11.542985 
            11.9059172 12.2687693 12.6315298 12.9941816 13.3567104 13.7191019 14.0813408 
            14.4434118 14.8053026 15.166996 15.5284777 15.8897352 16.2507515 16.611515 
            16.9720078 17.3322182 17.692131 18.051733 18.4110088 18.7699451 19.1285286 
            19.4867439 19.8445778 20.2020168 20.5590477 20.915657 21.2718315 21.6275578 
            21.9828205 22.3376102 22.6919117 23.0457134 23.3990002 23.7517624 24.1039867 
            24.4556599 24.8067703 25.1573048 25.5072536 25.8566017 26.2053413 26.5534573 
            26.9009399 27.2477779 27.5939579 27.9394722 28.2843094 28.6284561 28.9719028 
            -10.5978498 -10.2563248 -9.91404438 -9.57102013 -9.22726059 -8.88277721 
            -8.53758049 -8.19167995 -7.84508705 -7.49781322 -7.14986897 -6.80126572 
            -6.45201492 -6.10212803 -5.75161648 -5.40049267 -5.04876757 -4.69645405 
            -4.34356403 -3.99011016 -3.63610435 -3.28155923 -2.92648792 -2.57090306 
            -2.21481752 -1.8582443 -1.50119662 -1.14368784 -0.785731375 -0.427340567 
            -0.0685291141 0.290689319 0.65030092 1.01029193 1.37064815 1.73135567 
            2.09240031 2.45376778 2.81544399 3.17741418 3.53966427 3.90217948 4.26494551 
            4.62794733 4.99117041 5.35460043 5.71822166 6.08202028 6.44598055 6.81008768 
            7.1743269 7.53868341 7.9031415 8.26768684 8.63230419 8.99697781 9.36169338 
            9.72643566 10.0911884 10.4559383 10.8206682 11.1853657 11.5500126 11.9145956 
            12.2790995 12.6435089 13.0078087 13.3719835 13.7360191 14.0999002 14.4636116 
            14.8271399 15.1904678 15.5535822 15.9164677 16.27911 16.6414948 17.0036068 
            17.3654327 17.7269554 18.0881634 18.4490414 18.8095741 19.1697502 19.5295525 
            19.8889694 20.2479858 20.6065903 20.9647655 21.3224983 21.6797791 22.0365906 
            22.3929214 22.7487583 23.1040878 23.4588985 23.8131752 24.1669064 24.5200806 
            24.8726845 25.2247047 25.5761299 25.9269505 26.2771511 26.6267204 26.9756489 
            27.323925 27.6715355 28.0184689 28.3647175 28.710268 29.055109 -10.6879807 
            -10.3450928 -10.001441 -9.65703487 -9.31188393 -8.96600056 -8.6193943 
            -8.27207565 -7.92405605 -7.57534599 -7.22595739 -6.87590122 -6.52518892 
            -6.17383194 -5.82184267 -5.46923256 -5.116014 -4.76219893 -4.40779972 
            -4.05282879 -3.697299 -3.341223 -2.98461366 -2.62748384 -2.26984668 -1.91171539 
            -1.55310333 -1.19402397 -0.834490776 -0.474517524 -0.114117905 0.246694177 
            0.607904792 0.969499767 1.33146513 1.69378638 2.05644941 2.41943979 2.78274298 
            3.14634418 3.51022911 3.87438273 4.23879051 4.60343742 4.96830893 5.33338976 
            5.69866467 6.06411934 6.42973757 6.79550505 7.16140652 7.52742672 7.8935504 
            8.25976181 8.62604618 8.99238777 9.35877228 9.72518349 10.0916061 10.458025 
            10.8244238 11.1907892 11.5571041 11.9233541 12.2895231 12.6555967 13.0215597 
            13.3873959 13.7530909 14.1186295 14.4839964 14.8491755 15.2141542 15.5789146 
            15.9434443 16.3077259 16.6717472 17.0354919 17.3989468 17.7620945 18.1249237 
            18.4874172 18.8495636 19.2113457 19.5727501 19.9337616 20.2943707 20.6545582 
            21.0143127 21.373621 21.7324696 22.0908413 22.4487286 22.8061123 23.1629848 
            23.5193291 23.8751335 24.2303848 24.5850716 24.9391804 25.2926979 25.6456146 
            25.9979153 26.3495903 26.7006264 27.051012 27.4007359 27.7497864 28.0981522 
            28.4458237 28.7927876 29.1390343 -10.7788849 -10.4346247 -10.089591 -9.74379253 
            -9.39724159 -9.04994678 -8.70192051 -8.35317326 -8.00371456 -7.65355778 
            -7.30271339 -6.95119238 -6.59900665 -6.24616814 -5.89268923 -5.53858089 
            -5.18385649 -4.82852745 -4.47260666 -4.11610651 -3.75904012 -3.40142012 
            -3.04325986 -2.68457198 -2.32537007 -1.96566725 -1.60547733 -1.2448138 
            -0.883690298 -0.522120833 -0.160119176 0.202300519 0.565124154 0.928337395 
            1.29192603 1.65587544 2.0201714 2.384799 2.7497437 3.11499071 3.48052502 
            3.84633207 4.21239662 4.5787034 4.94523811 5.31198502 5.67892838 6.04605389 
            6.41334581 6.7807889 7.14836788 7.51606703 7.8838706 8.2517643 8.61973095 
            8.98775673 9.35582447 9.72391987 10.0920267 10.4601297 10.8282137 11.1962624 
            11.5642605 11.9321928 12.3000431 12.6677971 13.0354376 13.4029503 13.7703199 
            14.1375303 14.5045671 14.8714142 15.2380562 15.6044788 15.9706669 16.3366051 
            16.7022762 17.0676689 17.4327679 17.7975559 18.1620197 18.526144 18.8899136 
            19.2533169 19.6163368 19.97896 20.3411732 20.702961 21.0643082 21.4252033 
            21.7856331 22.1455803 22.5050335 22.8639812 23.2224064 23.5802994 23.9376431 
            24.2944279 24.6506405 25.0062656 25.3612957 25.7157135 26.0695076 26.4226685 
            26.7751827 27.127037 27.47822 27.8287239 28.1785316 28.5276356 28.8760242 
            29.2236862 -10.870574 -10.5249319 -10.1785049 -9.83130455 -9.48334122 
            -9.13462543 -8.78516769 -8.43498039 -8.08407307 -7.73245764 -7.38014507 
            -7.02714825 -6.67347765 -6.31914568 -5.96416473 -5.60854626 -5.25230312 
            -4.89544773 -4.53799248 -4.17995071 -3.82133484 -3.46215796 -3.1024332 
            -2.74217415 -2.38139415 -2.02010655 -1.65832496 -1.29606354 -0.93333596 
            -0.570156217 -0.206538528 0.157502934 0.521953821 0.886799693 1.25202596 
            1.6176182 1.9835614 2.34984112 2.71644211 3.08334947 3.45054841 3.81802368 
            4.18576002 4.55374193 4.92195511 5.29038286 5.65901041 6.02782249 6.39680338 
            6.76593733 7.13520861 7.50460196 7.87410212 8.2436924 8.61335754 8.98308182 
            9.35284996 9.72264481 10.092452 10.4622555 10.8320389 11.201787 11.5714836 
            11.9411135 12.3106604 12.680109 13.0494432 13.4186478 13.7877073 14.1566057 
            14.5253277 14.893857 15.2621794 15.6302786 15.9981403 16.3657475 16.7330856 
            17.1001415 17.466898 17.8333397 18.1994534 18.5652218 18.9306335 19.2956715 
            19.6603222 20.0245705 20.388401 20.7518024 21.1147575 21.477253 21.8392773 
            22.2008133 22.5618477 22.922369 23.2823639 23.6418152 24.0007133 24.359045 
            24.716795 25.0739517 25.4305019 25.7864342 26.1417351 26.4963932 26.8503971 
            27.2037315 27.5563869 27.9083538 28.2596149 28.6101646 28.9599895 29.3090763 
            -10.9630575 -10.6160221 -10.2681923 -9.91957951 -9.57019329 -9.22004509 
            -8.86914635 -8.5175066 -8.1651392 -7.81205368 -7.45826244 -7.10377741 
            -6.74861002 -6.39277267 -6.03627729 -5.67913628 -5.32136202 -4.96296787 
            -4.60396576 -4.24436903 -3.88419032 -3.52344346 -3.16214132 -2.8002975 
            -2.43792558 -2.07503939 -1.71165276 -1.34777951 -0.983433723 -0.618629694 
            -0.25338167 0.112295896 0.478388488 0.844881475 1.21176016 1.57900977 
            1.94661522 2.31456161 2.68283391 3.05141711 3.42029548 3.78945422 4.15887737 
            4.52855015 4.89845657 5.26858091 5.63890839 6.0094223 6.3801074 6.75094748 
            7.12192774 7.49303102 7.86424255 8.23554611 8.60692501 8.97836399 9.34984684 
            9.7213583 10.0928812 10.4644003 10.8358994 11.2073622 11.5787735 11.9501162 
            12.3213758 12.6925354 13.0635786 13.4344912 13.8052559 14.1758575 14.5462799 
            14.9165077 15.2865248 15.6563168 16.0258656 16.3951588 16.7641792 17.1329117 
            17.5013428 17.8694534 18.2372303 18.60466 18.9717274 19.3384132 19.7047081 
            20.0705948 20.43606 20.8010883 21.1656647 21.5297756 21.8934078 22.256546 
            22.6191769 22.981287 23.3428612 23.7038879 24.064352 24.4242401 24.7835426 
            25.1422424 25.5003281 25.8577862 26.2146053 26.5707741 26.9262772 27.281105 
            27.6352463 27.9886856 28.3414135 28.6934185 29.0446892 29.3952141 -11.056345 
            -10.7079067 -10.3586636 -10.0086269 -9.65780735 -9.30621624 -8.9538641 
            -8.60076237 -8.24692249 -7.89235544 -7.53707361 -7.18108845 -6.82441235 
            -6.46705723 -6.10903549 -5.75035906 -5.39104176 -5.0310955 -4.67053318 
            -4.30936861 -3.94761443 -3.58528399 -3.22239089 -2.85894895 -2.49497175 
            -2.1304729 -1.76546705 -1.39996791 -1.03398979 -0.667547107 -0.300654352 
            0.0666738153 0.434422731 0.802577615 1.1711235 1.54004526 1.90932798 
            2.27895641 2.64891529 3.01918912 3.3897624 3.76061988 4.13174582 4.50312424 
            4.87474012 5.24657679 5.61861897 5.99085093 6.36325598 6.73581839 7.10852289 
            7.48135233 7.85429144 8.22732353 8.6004324 8.97360229 9.34681606 9.72005939 
            10.0933142 10.4665651 10.8397951 11.2129898 11.5861311 11.9592037 12.3321905 
            12.7050772 13.0778456 13.4504814 13.8229675 14.1952877 14.5674267 14.9393682 
            15.3110962 15.6825953 16.0538502 16.4248428 16.7955608 17.165987 17.5361042 
            17.905901 18.2753582 18.6444626 19.0131969 19.3815498 19.7495041 20.1170444 
            20.4841557 20.8508263 21.2170372 21.5827789 21.9480324 22.3127861 22.6770267 
            23.0407372 23.4039078 23.7665195 24.1285648 24.4900265 24.8508911 25.2111473 
            25.5707798 25.9297791 26.2881279 26.6458187 27.0028362 27.359169 27.7148037 
            28.0697289 28.4239349 28.7774067 29.1301346 29.4821072 -11.1504469 -10.8005953 
            -10.4499283 -10.0984573 -9.74619389 -9.39314842 -9.03933239 -8.68475628 
            -8.32943249 -7.97337246 -7.61658812 -7.2590909 -6.90089369 -6.5420084 
            -6.18244743 -5.82222366 -5.46134996 -5.09983921 -4.7377038 -4.37495804 
            -4.0116148 -3.6476872 -3.28318977 -2.91813564 -2.55253911 -2.186414 -1.81977451 
            -1.45263517 -1.08501041 -0.716914594 -0.348362535 0.0206309743 0.390051037 
            0.759882689 1.13011074 1.50072002 1.87169516 2.24302077 2.61468148 2.98666143 
            3.35894537 3.73151708 4.10436106 4.47746134 4.85080194 5.22436714 5.59814024 
            5.9721055 6.3462472 6.72054815 7.09499264 7.46956444 7.84424686 8.2190237 
            8.59387875 8.96879578 9.34375763 9.71874809 10.093751 10.46875 10.8437281 
            11.2186699 11.5935574 11.9683752 12.3431072 12.7177362 13.092247 13.4666214 
            13.8408442 14.2149 14.5887709 14.9624424 15.3358974 15.7091198 16.0820942 
            16.4548035 16.8272343 17.1993675 17.5711899 17.9426842 18.3138371 18.6846313 
            19.0550518 19.4250832 19.7947121 20.1639194 20.5326939 20.9010201 21.2688828 
            21.6362667 22.0031586 22.3695412 22.735405 23.1007309 23.4655094 23.8297234 
            24.1933594 24.556406 24.918848 25.280674 25.6418667 26.0024185 26.3623123 
            26.7215366 27.08008 27.4379272 27.7950706 28.1514931 28.5071869 28.8621387 
            29.2163353 29.5697689 -11.2453737 -10.8940983 -10.541997 -10.1890812 
            -9.83536243 -9.48085117 -9.12555981 -8.76949883 -8.41267967 -8.05511379 
            -7.69681501 -7.33779383 -6.97806311 -6.61763525 -6.25652266 -5.89473867 
            -5.5322957 -5.16920662 -4.80548525 -4.44114494 -4.07619858 -3.71066093 
            -3.34454489 -2.97786498 -2.6106348 -2.24286914 -1.87458205 -1.50578809 
            -1.13650191 -0.766738355 -0.39651221 -0.0258384477 0.345267802 0.716791332 
            1.08871675 1.46102881 1.83371174 2.20675015 2.58012819 2.95383024 3.32784033 
            3.70214224 4.07672024 4.45155811 4.82664013 5.20194912 5.57746935 5.9531846 
            6.32907867 6.70513391 7.08133507 7.45766544 7.83410788 8.21064663 8.58726406 
            8.96394348 9.34066963 9.71742439 10.0941925 10.4709558 10.8476982 11.2244034 
            11.6010542 11.9776335 12.354126 12.7305145 13.106782 13.482913 13.8588896 
            14.2346964 14.6103163 14.985733 15.3609304 15.7358923 16.1106014 16.4850445 
            16.8592014 17.2330608 17.6066017 17.9798126 18.3526745 18.725174 19.0972958 
            19.4690208 19.8403378 20.2112312 20.5816822 20.9516792 21.3212051 21.6902466 
            22.0587902 22.4268188 22.7943172 23.161274 23.5276737 23.8935032 24.2587471 
            24.6233921 24.9874249 25.3508301 25.7135983 26.0757141 26.4371643 26.7979355 
            27.1580162 27.5173931 27.8760548 28.2339897 28.5911827 28.9476242 29.3033028 
            29.658205 -11.3411369 -10.9884262 -10.6348791 -10.280508 -9.92532253 
            -9.56933498 -9.21255684 -8.85499859 -8.49667168 -8.13758945 -7.77776384 
            -7.41720629 -7.05593014 -6.69394684 -6.33126974 -5.9679122 -5.6038866 
            -5.23920679 -4.87388563 -4.50793743 -4.14137506 -3.7742126 -3.40646434 
            -3.03814411 -2.66926646 -2.2998457 -1.92989635 -1.55943322 -1.18847108 
            -0.817024767 -0.445109487 -0.072740376 0.300067246 0.673297942 1.04693627 
            1.42096651 1.79537296 2.17013979 2.54525113 2.92069101 3.29644299 3.67249131 
            4.04881954 4.42541122 4.80225039 5.17931986 5.55660391 5.93408537 6.31174803 
            6.68957472 7.06754923 7.44565392 7.82387304 8.20218945 8.58058643 8.95904636 
            9.33755302 9.71608829 10.0946379 10.4731817 10.8517056 11.2301912 11.6086216 
            11.9869795 12.3652496 12.7434139 13.1214552 13.4993582 13.8771048 14.2546787 
            14.6320639 15.009243 15.386199 15.7629166 16.1393776 16.5155697 16.8914719 
            17.2670689 17.6423473 18.0172882 18.3918762 18.7660961 19.1399326 19.5133686 
            19.8863907 20.2589798 20.6311245 21.0028076 21.3740139 21.7447281 22.1149368 
            22.484623 22.853775 23.222374 23.5904102 23.9578686 24.3247318 24.6909885 
            25.0566254 25.421627 25.7859821 26.1496754 26.5126934 26.8750267 27.2366581 
            27.5975761 27.9577694 28.3172245 28.67593 29.0338745 29.3910446 29.7474289 
            -11.4377451 -11.0835896 -10.7285872 -10.3727484 -10.0160856 -9.65861034 
            -9.30033302 -8.94126606 -8.5814209 -8.22080898 -7.85944462 -7.49733829 
            -7.13450336 -6.77095222 -6.40669775 -6.04175377 -5.67613268 -5.30984831 
            -4.94291401 -4.57534361 -4.20715094 -3.8383503 -3.46895552 -3.0989809 
            -2.72844124 -2.35735083 -1.98572457 -1.61357737 -1.24092424 -0.867780149 
            -0.494160593 -0.120080836 0.254443586 0.629397035 1.00476384 1.38052797 
            1.75667381 2.13318491 2.51004553 2.88723922 3.26474953 3.64256048 4.02065516 
            4.39901733 4.77762985 5.1564765 5.53554058 5.91480494 6.29425287 6.6738677 
            7.05363178 7.4335289 7.81354141 8.19365215 8.57384491 8.95410156 9.3344059 
            9.7147398 10.0950871 10.4754295 10.855751 11.2360334 11.6162605 11.9964142 
            12.3764782 12.7564354 13.1362677 13.5159597 13.8954926 14.2748508 14.6540174 
            15.0329752 15.4117069 15.7901964 16.1684265 16.546381 16.9240437 17.3013973 
            17.6784267 18.0551147 18.4314461 18.8074036 19.18297 19.5581322 19.9328728 
            20.3071766 20.6810284 21.0544128 21.4273129 21.799715 22.1716042 22.542963 
            22.9137802 23.2840405 23.6537266 24.0228252 24.391325 24.7592068 25.126461 
            25.4930725 25.859026 26.2243118 26.588913 26.952816 27.3160114 27.678484 
            28.0402203 28.4012108 28.7614403 29.1208973 29.4795704 29.83745 -11.5352116 
            -11.1795998 -10.8231297 -10.4658136 -10.1076622 -9.74868679 -9.3888998 
            -9.02831173 -8.66693497 -8.30478287 -7.9418664 -7.57819891 -7.21379232 
            -6.84866047 -6.48281574 -6.11627197 -5.74904203 -5.38113928 -5.01257801 
            -4.64337206 -4.27353525 -3.90308189 -3.53202629 -3.16038299 -2.78816652 
            -2.41539192 -2.04207373 -1.66822755 -1.29386818 -0.919011176 -0.543671906 
            -0.167865977 0.208390862 0.585082769 0.962193847 1.33970797 1.71760905 
            2.09588075 2.47450686 2.8534708 3.2327559 3.6123457 3.9922235 4.37237215 
            4.75277567 5.13341618 5.51427698 5.89534092 6.2765913 6.65801096 7.03958225 
            7.42128801 7.80311108 8.1850338 8.56703949 8.94911098 9.33122921 9.71337891 
            10.095541 10.4776983 10.8598347 11.2419319 11.6239719 12.0059385 12.3878145 
            12.7695808 13.1512213 13.5327187 13.9140558 14.2952156 14.6761799 15.0569324 
            15.4374571 15.8177347 16.1977501 16.577486 16.9569263 17.3360519 17.7148495 
            18.0932999 18.4713879 18.8490982 19.2264137 19.6033173 19.9797935 20.3558254 
            20.7314014 21.1065006 21.4811115 21.8552151 22.2287998 22.6018486 22.9743462 
            23.3462772 23.7176285 24.0883846 24.4585323 24.8280544 25.1969395 25.5651741 
            25.9327412 26.2996311 26.6658268 27.0313168 27.3960876 27.7601261 28.1234188 
            28.4859543 28.8477211 29.208704 29.5688934 29.9282761 -11.6335468 -11.2764673 
            -10.91852 -10.5597143 -10.2000628 -9.83957577 -9.47826672 -9.11614609 
            -8.75322628 -8.38951969 -8.02503967 -7.65979767 -7.29380751 -6.92708158 
            -6.55963326 -6.19147587 -5.82262373 -5.45308924 -5.08288717 -4.71203136 
            -4.34053612 -3.96841598 -3.59568501 -3.22235799 -2.84845018 -2.47397614 
            -2.09895134 -1.72339082 -1.34730995 -0.970724404 -0.593649864 -0.216102064 
            0.161903024 0.540349364 0.919220805 1.29850101 1.67817378 2.05822229 
            2.43863034 2.819381 3.20045733 3.5818429 3.96352053 4.34547329 4.72768354 
            5.11013508 5.49280977 5.87569094 6.25876093 6.64200258 7.02539778 7.40892982 
            7.7925806 8.17633343 8.56016922 8.94407177 9.328022 9.71200371 10.0959988 
            10.47999 10.8639584 11.2478867 11.6317587 12.0155544 12.3992586 12.7828522 
            13.1663179 13.5496387 13.9327965 14.315774 14.698554 15.0811195 15.4634523 
            15.8455362 16.227354 16.6088867 16.9901199 17.3710365 17.7516174 18.1318474 
            18.5117111 18.8911896 19.2702675 19.6489277 20.0271549 20.4049339 20.7822475 
            21.1590786 21.5354137 21.9112377 22.2865314 22.6612835 23.0354767 23.4090958 
            23.7821255 24.1545525 24.5263634 24.897541 25.2680702 25.6379414 26.0071354 
            26.3756428 26.7434464 27.1105347 27.4768963 27.8425121 28.2073765 28.5714703 
            28.9347858 29.2973061 29.6590233 30.0199223 -11.7327614 -11.3742046 -11.0147676 
            -10.6544609 -10.2932978 -9.93128777 -9.56844425 -9.20477867 -8.84030342 
            -8.4750309 -8.10897446 -7.74214554 -7.37455797 -7.00622511 -6.63715982 
            -6.26737595 -5.89688683 -5.52570677 -5.15385008 -4.78133059 -4.40816212 
            -4.03436041 -3.65993953 -3.28491426 -2.90929985 -2.53311157 -2.15636444 
            -1.77907431 -1.40125644 -1.02292669 -0.644101083 -0.264795482 0.114973918 
            0.495190859 0.875838935 1.25690162 1.63836241 2.02020454 2.40241098 2.78496528 
            3.16785002 3.55104804 3.93454266 4.31831598 4.70235109 5.08663082 5.47113657 
            5.85585213 6.2407589 6.62583971 7.01107693 7.39645243 7.78194904 8.16754818 
            8.55323219 8.93898392 9.32478428 9.71061611 10.0964613 10.4823027 10.8681211 
            11.2538996 11.6396198 12.0252628 12.4108133 12.7962513 13.1815596 13.566721 
            13.9517174 14.3365307 14.7211437 15.1055384 15.4896984 15.8736048 16.2572403 
            16.6405888 17.023632 17.4063549 17.7887363 18.170763 18.5524158 18.9336796 
            19.314537 19.694973 20.0749683 20.4545078 20.8335743 21.2121544 21.5902309 
            21.9677868 22.3448067 22.7212772 23.0971794 23.4725018 23.8472271 24.2213402 
            24.5948257 24.9676723 25.3398628 25.7113819 26.0822182 26.4523563 26.8217831 
            27.1904831 27.558445 27.9256554 28.2921009 28.6577663 29.0226421 29.386713 
            29.7499695 30.1123981 -11.8328676 -11.4728222 -11.1118841 -10.7500658 
            -10.3873787 -10.0238342 -9.65944386 -9.29422188 -8.92817783 -8.56132698 
            -8.19368076 -7.82525206 -7.45605421 -7.08610058 -6.71540499 -6.34398031 
            -5.97184134 -5.59900188 -5.22547579 -4.85127783 -4.47642231 -4.10092402 
            -3.7247982 -3.34805965 -2.97072363 -2.59280562 -2.2143209 -1.83528543 
            -1.4557147 -1.07562506 -0.695032239 -0.313952714 0.0675972626 0.449601144 
            0.832042396 1.21490419 1.5981698 1.98182213 2.36584425 2.75021887 3.13492894 
            3.51995707 3.9052856 4.29089737 4.6767745 5.06289911 5.44925404 5.83582163 
            6.22258282 6.60952091 6.99661779 7.38385487 7.77121401 8.15867805 8.54622841 
            8.93384647 9.32151508 9.70921516 10.0969286 10.4846382 10.872324 11.2599697 
            11.6475563 12.0350657 12.4224796 12.8097801 13.196949 13.5839691 13.9708214 
            14.3574877 14.7439508 15.1301928 15.5161963 15.9019432 16.2874146 16.672596 
            17.0574665 17.4420109 17.8262119 18.2100506 18.5935116 18.9765778 19.3592319 
            19.741457 20.1232357 20.5045528 20.8853912 21.2657337 21.645565 22.0248718 
            22.4036331 22.7818356 23.1594658 23.5365047 23.9129391 24.2887535 24.6639309 
            25.0384598 25.412323 25.7855091 26.157999 26.5297832 26.9008446 27.2711716 
            27.640749 28.0095634 28.3776016 28.7448521 29.1113014 29.4769363 29.8417435 
            30.2057133 -11.933877 -11.5723305 -11.2098808 -10.8465385 -10.482316 
            -10.1172247 -9.75127697 -9.38448524 -9.01686096 -8.64841843 -8.27916908 
            -7.90912771 -7.53830624 -7.16671848 -6.79437828 -6.42129993 -6.04749632 
            -5.67298269 -5.29777336 -4.92188215 -4.5453248 -4.16811562 -3.79026985 
            -3.41180277 -3.03272963 -2.6530664 -2.27282834 -1.89203167 -1.51069224 
            -1.12882638 -0.746450245 -0.363580376 0.0197666492 0.403574109 0.787825227 
            1.17250299 1.55759025 1.94307005 2.32892489 2.71513724 3.10169005 3.48856544 
            3.87574577 4.26321316 4.65094995 5.03893805 5.42715931 5.81559658 6.20423079 
            6.5930438 6.98201799 7.37113428 7.76037502 8.1497221 8.53915596 8.92865944 
            9.31821346 9.70779991 10.0974007 10.4869957 10.8765688 11.2660999 11.655571 
            12.0449638 12.4342594 12.8234406 13.2124882 13.6013842 13.9901104 14.3786478 
            14.7669792 15.1550865 15.5429506 15.9305553 16.3178806 16.7049122 17.0916271 
            17.4780121 17.864048 18.2497177 18.635004 19.0198879 19.4043541 19.7883854 
            20.1719646 20.5550766 20.9377003 21.3198242 21.7014294 22.0824986 22.4630184 
            22.8429699 23.2223415 23.6011124 23.9792709 24.3568001 24.7336864 25.1099129 
            25.4854641 25.8603268 26.2344875 26.6079311 26.9806423 27.3526077 27.723814 
            28.0942459 28.4638939 28.8327408 29.2007771 29.5679855 29.9343567 30.2998791 
            -12.0358019 -11.6727438 -11.3087702 -10.9438934 -10.5781231 -10.2114725 
            -9.84395409 -9.47558022 -9.10636234 -8.73631573 -8.36545086 -7.993783 
            -7.62132454 -7.24808884 -6.87409067 -6.49934387 -6.12386179 -5.74766016 
            -5.37075233 -4.99315357 -4.61487913 -4.23594379 -3.85636258 -3.47615147 
            -3.09532595 -2.71390152 -2.3318944 -1.94932055 -1.5661962 -1.18253791 
            -0.798361957 -0.413685232 -0.0285244361 0.357103467 0.743181348 1.12969208 
            1.51661837 1.9039427 2.29164767 2.67971539 3.06812859 3.45686889 3.84591842 
            4.23525953 4.62487364 5.01474333 5.40484953 5.79517412 6.18569899 6.57640553 
            6.96727514 7.35828972 7.74943018 8.14067841 8.53201485 8.92342186 9.31488037 
            9.70637131 10.0978765 10.489377 10.8808546 11.2722893 11.6636629 12.0549583 
            12.4461546 12.8372345 13.228179 13.618969 14.0095873 14.4000139 14.7902317 
            15.1802225 15.5699663 15.959446 16.3486443 16.7375412 17.1261196 17.5143623 
            17.9022522 18.2897682 18.6768951 19.0636158 19.449913 19.8357677 20.2211647 
            20.6060848 20.9905128 21.3744335 21.7578259 22.1406765 22.5229702 22.9046879 
            23.2858143 23.6663342 24.0462322 24.4254932 24.8041 25.1820393 25.5592937 
            25.9358501 26.3116932 26.6868095 27.0611839 27.434803 27.8076515 28.1797161 
            28.5509853 28.921442 29.2910767 29.659874 30.0278206 30.394907 -12.1386538 
            -11.7740726 -11.4085646 -11.0421391 -10.6748104 -10.3065882 -9.93748665 
            -9.56751823 -9.19669437 -8.82503033 -8.45253658 -8.0792284 -7.70511913 
            -7.33022261 -6.95455217 -6.57812214 -6.20094776 -5.82304287 -5.44442225 
            -5.06510115 -4.68509436 -4.30441761 -3.92308569 -3.54111505 -3.15852094 
            -2.77531958 -2.39152718 -2.00715995 -1.62223434 -1.23676693 -0.850774586 
            -0.464274138 -0.0772826374 0.31018275 0.69810468 1.08646572 1.47524834 
            1.86443496 2.25400758 2.64394855 3.03423953 3.42486286 3.81579995 4.20703268 
            4.59854269 4.99031162 5.38232088 5.77455187 6.16698599 6.55960417 6.95238829 
            7.34531927 7.73837805 8.13154602 8.52480316 8.91813278 9.3115139 9.7049284 
            10.0983572 10.4917812 10.8851824 11.2785397 11.6718359 12.0650511 12.4581661 
            12.8511639 13.2440233 13.6367264 14.0292549 14.4215899 14.8137131 15.2056036 
            15.5972462 15.9886198 16.3797073 16.7704887 17.1609478 17.5510674 17.9408264 
            18.3302078 18.7191944 19.107769 19.4959126 19.8836079 20.2708378 20.6575871 
            21.0438347 21.4295673 21.8147659 22.1994152 22.5834961 22.9669952 23.3498955 
            23.7321796 24.1138325 24.4948387 24.8751831 25.2548485 25.6338215 26.012085 
            26.3896275 26.7664318 27.1424828 27.5177689 27.8922729 28.2659836 28.6388855 
            29.0109673 29.3822117 29.7526093 30.1221466 30.4908104 -12.242445 -11.8763304 
            -11.5092745 -11.1412907 -10.7723894 -10.4025841 -10.0318871 -9.66031075 
            -9.2878685 -8.91457272 -8.5404377 -8.16547585 -7.78970194 -7.41312933 
            -7.0357728 -6.65764618 -6.27876377 -5.89914131 -5.51879263 -5.13773394 
            -4.75597954 -4.37354565 -3.99044776 -3.60670161 -3.22232318 -2.83732891 
            -2.45173478 -2.06555772 -1.67881417 -1.29152107 -0.903695345 -0.515354156 
            -0.126514733 0.262805432 0.652588844 1.04281783 1.43347442 1.82454097 
            2.21599936 2.60783124 3.0000186 3.39254284 3.78538561 4.17852879 4.57195282 
            4.96563959 5.3595705 5.75372648 6.14808846 6.54263735 6.93735456 7.33222055 
            7.72721624 8.12232304 8.5175209 8.91279125 9.30811501 9.70347214 10.0988436 
            10.4942102 10.8895521 11.284852 11.680088 12.075243 12.4702969 12.8652296 
            13.2600241 13.6546593 14.0491171 14.4433784 14.8374243 15.2312355 15.6247931 
            16.0180798 16.4110737 16.8037605 17.1961193 17.588131 17.9797783 18.3710423 
            18.7619057 19.1523514 19.5423603 19.9319134 20.3209953 20.709589 21.0976734 
            21.4852352 21.8722553 22.2587185 22.6446056 23.0299015 23.4145908 23.7986546 
            24.1820793 24.564846 24.9469433 25.328352 25.7090569 26.0890446 26.468298 
            26.8468056 27.2245483 27.6015148 27.9776897 28.3530598 28.7276096 29.101326 
            29.4741974 29.8462086 30.2173462 30.5875988 -12.3471889 -11.9795275 -11.6109133 
            -11.2413578 -10.8708735 -10.4994717 -10.1271667 -9.75397015 -9.37989521 
            -9.00495529 -8.62916374 -8.25253487 -7.87508297 -7.49682045 -7.11776304 
            -6.73792505 -6.35732079 -5.9759655 -5.59387398 -5.21106195 -4.82754517 
            -4.44333839 -4.05845833 -3.67292047 -3.28674173 -2.89993787 -2.5125258 
            -2.12452197 -1.73594368 -1.34680784 -0.957131565 -0.566932321 -0.176227644 
            0.214964882 0.606627405 0.998742044 1.39129066 1.78425527 2.17761731 
            2.57135868 2.96546054 3.35990429 3.75467134 4.14974308 4.54510021 4.9407239 
            5.33659506 5.73269463 6.12900352 6.5255022 6.92217159 7.31899214 7.71594429 
            8.1130085 8.51016617 8.90739727 9.30468178 9.70200062 10.0993338 10.4966621 
            10.8939667 11.2912264 11.6884232 12.085536 12.4825468 12.8794355 13.2761831 
            13.6727695 14.0691757 14.4653826 14.8613701 15.2571201 15.6526127 16.0478306 
            16.4427509 16.8373585 17.2316341 17.6255589 18.0191116 18.4122772 18.8050365 
            19.1973705 19.589262 19.9806919 20.3716412 20.7620964 21.1520367 21.5414448 
            21.9303036 22.3185959 22.7063065 23.0934162 23.4799099 23.8657703 24.2509823 
            24.6355267 25.0193901 25.4025574 25.7850113 26.1667366 26.547718 26.9279404 
            27.3073902 27.6860523 28.0639114 28.4409542 28.8171654 29.1925316 29.5670414 
            29.9406796 30.3134308 30.6852856 -12.452898 -12.0836792 -11.7134943 -11.3423548 
            -10.970274 -10.5972633 -10.2233372 -9.84850693 -9.47278595 -9.0961895 
            -8.71872807 -8.34041882 -7.96127319 -7.58130741 -7.20053434 -6.8189702 
            -6.43662882 -6.05352545 -5.66967583 -5.28509521 -4.89979982 -4.51380444 
            -4.12712622 -3.7397809 -3.35178494 -2.96315503 -2.57390809 -2.18406105 
            -1.79363084 -1.40263498 -1.01109087 -0.619016051 -0.226428375 0.166654289 
            0.560213864 0.954232275 1.34869111 1.74357188 2.13885617 2.53452516 2.93056035 
            3.32694244 3.7236526 4.12067175 4.51798105 4.91556072 5.31339169 5.71145391 
            6.10972881 6.50819683 6.90683746 7.30563164 7.7045598 8.10360146 8.502738 
            8.90194893 9.30121422 9.70051384 10.0998287 10.4991388 10.8984241 11.2976646 
            11.6968403 12.095932 12.4949198 12.8937836 13.2925034 13.6910601 14.0894337 
            14.4876051 14.8855543 15.2832623 15.6807089 16.0778751 16.4747429 16.8712902 
            17.2675018 17.6633568 18.058836 18.4539204 18.8485928 19.2428322 19.6366253 
            20.0299473 20.4227848 20.8151188 21.2069302 21.5982018 21.9889183 22.3790588 
            22.7686081 23.1575489 23.5458622 23.9335365 24.320549 24.7068882 25.092535 
            25.4774761 25.8616924 26.2451706 26.6278954 27.0098495 27.3910198 27.7713928 
            28.1509495 28.5296783 28.9075661 29.2845974 29.6607571 30.0360336 30.4104137 
            30.783884 -12.5595846 -12.188796 -11.817028 -11.444293 -11.0706034 -10.6959724 
            -10.3204107 -9.94393444 -9.56655502 -9.18828583 -8.80914211 -8.42913723 
            -8.04828548 -7.66660023 -7.28409767 -6.90079212 -6.51669836 -6.13183212 
            -5.74620867 -5.35984421 -4.97275352 -4.58495378 -4.1964612 -3.80729151 
            -3.41746211 -3.02698946 -2.63589072 -2.24418283 -1.85188365 -1.45901036 
            -1.06558073 -0.67161268 -0.277124107 0.117866725 0.513341606 0.909282029 
            1.30566943 1.70248508 2.09971023 2.4973259 2.89531302 3.29365253 3.69232488 
            4.09131098 4.49059105 4.89014626 5.28995609 5.69000101 6.09026146 6.49071789 
            6.89134979 7.29213762 7.69306135 8.0941 8.49523544 8.89644623 9.29771137 
            9.69901276 10.1003294 10.5016403 10.9029264 11.3041677 11.7053432 12.106432 
            12.5074167 12.9082747 13.3089867 13.7095337 14.1098948 14.5100498 14.9099798 
            15.3096647 15.7090845 16.1082191 16.5070515 16.9055595 17.3037262 17.7015285 
            18.0989532 18.4959755 18.8925781 19.2887459 19.6844559 20.0796909 20.474432 
            20.8686638 21.2623634 21.6555176 22.0481052 22.4401112 22.8315163 23.2223053 
            23.6124592 24.0019608 24.3907928 24.7789421 25.1663895 25.5531178 25.9391136 
            26.3243618 26.7088432 27.0925446 27.4754505 27.8575459 28.2388153 28.6192474 
            28.9988232 29.3775311 29.7553558 30.1322861 30.5083065 30.8834057 -12.667263 
            -12.2948933 -11.9215298 -11.5471869 -11.171876 -10.7956095 -10.4184017 
            -10.0402641 -9.66121197 -9.28125858 -8.90041733 -8.51870251 -8.13612938 
            -7.7527113 -7.36846399 -6.98340178 -6.59754086 -6.21089602 -5.82348299 
            -5.43531799 -5.04641724 -4.65679646 -4.26647282 -3.87546253 -3.48378253 
            -3.09144998 -2.69848204 -2.30489635 -1.91071057 -1.5159421 -1.12060916 
            -0.724729776 -0.328322202 0.0685951337 0.466003686 0.863884747 1.26221943 
            1.66098881 2.06017375 2.45975518 2.85971355 3.26002955 3.66068363 4.061656 
            4.46292686 4.86447668 5.26628494 5.66833258 6.0705986 6.47306347 6.87570667 
            7.27850771 7.68144703 8.08450317 8.48765755 8.89088726 9.29417419 9.69749737 
            10.1008348 10.5041676 10.9074745 11.3107357 11.7139301 12.1170378 12.5200386 
            12.9229116 13.3256359 13.7281923 14.1305609 14.5327196 14.9346504 15.3363323 
            15.7377443 16.1388683 16.5396843 16.9401722 17.3403111 17.7400837 18.1394691 
            18.5384483 18.9370041 19.3351135 19.7327614 20.1299267 20.5265903 20.9227371 
            21.318346 21.713398 22.1078777 22.5017662 22.8950443 23.2876968 23.6797047 
            24.0710526 24.4617214 24.851696 25.2409592 25.6294937 26.0172844 26.4043159 
            26.7905712 27.176033 27.5606899 27.9445248 28.3275223 28.7096691 29.0909481 
            29.4713478 29.8508511 30.2294483 30.6071224 30.9838619 -12.7759466 -12.4019823 
            -12.0270119 -11.6510477 -11.2741022 -10.8961887 -10.5173206 -10.1375103 
            -9.75677109 -9.37511921 -8.99256611 -8.609128 -8.22481823 -7.83965206 
            -7.45364475 -7.06681108 -6.67916679 -6.29072809 -5.90150976 -5.51152849 
            -5.1208005 -4.72934246 -4.33717108 -3.9443028 -3.5507555 -3.15654588 
            -2.76169157 -2.36621022 -1.97011995 -1.57343841 -1.17618406 -0.778375089 
            -0.380030066 0.0188323129 0.418193251 0.818033755 1.21833479 1.61907697 
            2.02024102 2.42180729 2.82375646 3.2260685 3.62872386 4.03170204 4.43498373 
            4.83854818 5.24237537 5.64644527 6.0507369 6.45523024 6.85990477 7.26473999 
            7.66971493 8.07480907 8.4800024 8.88527298 9.29060078 9.69596577 10.1013451 
            10.5067196 10.9120684 11.3173704 11.7226048 12.1277514 12.5327883 12.9376965 
            13.342454 13.7470398 14.1514359 14.5556183 14.9595699 15.3632679 15.7666941 
            16.1698265 16.5726452 16.975132 17.377264 17.7790241 18.1803932 18.5813484 
            18.9818726 19.3819447 19.7815475 20.1806622 20.5792675 20.9773483 21.3748817 
            21.7718525 22.1682396 22.5640278 22.959198 23.3537331 23.7476139 24.1408234 
            24.5333443 24.9251614 25.3162575 25.7066135 26.0962143 26.4850464 26.8730888 
            27.2603302 27.6467533 28.032341 28.4170799 28.8009567 29.1839542 29.5660591 
            29.9472561 30.3275318 30.7068729 31.0852661 -12.8856478 -12.5100784 -12.1334877 
            -11.7558908 -11.3772984 -10.9977236 -10.6171808 -10.2356834 -9.85324478 
            -9.46987915 -9.08560085 -8.70042324 -8.31436348 -7.92743397 -7.53965139 
            -7.15103102 -6.7615881 -6.37133884 -5.980299 -5.58848524 -5.19591379 
            -4.80260181 -4.40856552 -4.01382303 -3.61839056 -3.22228622 -2.82552791 
            -2.42813325 -2.03012037 -1.63150775 -1.23231351 -0.832556486 -0.432255328 
            -0.0314290822 0.369903207 0.771722317 1.17400885 1.57674325 1.97990584 
            2.38347673 2.78743649 3.19176435 3.59644079 4.00144529 4.40675735 4.81235695 
            5.21822309 5.62433577 6.0306735 6.43721628 6.84394264 7.25083256 7.65786409 
            8.06501675 8.47227001 8.87960148 9.28699112 9.69441795 10.101861 10.5092983 
            10.9167089 11.3240728 11.7313681 12.1385736 12.5456686 12.952631 13.3594418 
            13.7660789 14.1725225 14.5787497 14.9847422 15.3904772 15.7959356 16.2010975 
            16.6059399 17.0104446 17.4145908 17.8183594 18.2217274 18.6246796 19.0271912 
            19.4292469 19.8308258 20.2319069 20.632473 21.032505 21.431982 21.8308887 
            22.2292023 22.6269093 23.0239887 23.4204216 23.8161926 24.2112808 24.6056728 
            24.9993496 25.3922939 25.7844887 26.1759167 26.5665627 26.9564114 27.3454456 
            27.7336483 28.121006 28.5075035 28.8931236 29.277853 29.6616764 30.0445805 
            30.4265499 30.8075733 31.1876335 -12.9963827 -12.619194 -12.2409716 -11.8617277 
            -11.4814749 -11.1002264 -10.7179966 -10.3347979 -9.95064545 -9.56555176 
            -9.179533 -8.79260349 -8.40477657 -8.01606941 -7.62649632 -7.23607349 
            -6.84481573 -6.45274019 -6.05986261 -5.66619968 -5.27176809 -4.87658501 
            -4.48066711 -4.08403206 -3.68669748 -3.28868103 -2.89000058 -2.4906745 
            -2.09072089 -1.69015849 -1.28900588 -0.887281954 -0.485005766 -0.0821965486 
            0.321126372 0.724943399 1.12923503 1.5339812 1.93916214 2.3447578 2.75074768 
            3.15711188 3.56382966 3.97088075 4.37824392 4.78589916 5.19382477 5.60200071 
            6.01040554 6.41901827 6.82781792 7.23678255 7.64589167 8.05512428 8.46445751 
            8.8738718 9.28334522 9.69285583 10.1023817 10.5119028 10.9213972 11.3308439 
            11.7402201 12.1495066 12.5586796 12.9677191 13.3766041 13.7853127 14.1938238 
            14.6021166 15.0101709 15.417964 15.8254757 16.2326851 16.6395721 17.0461159 
            17.4522953 17.8580914 18.2634811 18.6684475 19.0729694 19.477026 19.8805981 
            20.2836666 20.6862125 21.0882149 21.4896545 21.8905144 22.2907753 22.6904163 
            23.0894222 23.4877739 23.8854504 24.2824383 24.6787167 25.0742702 25.46908 
            25.8631287 26.2564011 26.64888 27.0405483 27.4313908 27.8213902 28.2105331 
            28.5988007 28.9861813 29.3726578 29.758215 30.1428394 30.5265179 30.9092331 
            31.2909737 -13.1081638 -12.7293444 -12.3494768 -11.9685736 -11.586648 
            -11.2037125 -10.8197803 -10.4348669 -10.0489864 -9.66215134 -9.27437687 
            -8.88567924 -8.49607182 -8.10557079 -7.71419144 -7.32194996 -6.92886162 
            -6.53494358 -6.14021158 -5.74468327 -5.34837437 -4.95130301 -4.55348587 
            -4.15494108 -3.75568652 -3.35573983 -2.95511913 -2.55384302 -2.15193033 
            -1.74939942 -1.34626961 -0.942559719 -0.538289249 -0.133477718 0.271855325 
            0.677690029 1.08400643 1.49078441 1.89800382 2.30564427 2.71368504 3.12210584 
            3.53088546 3.94000363 4.34943867 4.75917006 5.16917658 5.57943726 5.98992968 
            6.40063381 6.81152725 7.22258854 7.63379669 8.04512978 8.45656586 8.868083 
            9.27966118 9.69127655 10.1029081 10.514535 10.9261341 11.3376846 11.7491636 
            12.1605511 12.5718241 12.9829617 13.3939419 13.8047438 14.2153444 14.6257238 
            15.0358591 15.4457312 15.8553171 16.2645969 16.6735477 17.0821514 17.4903851 
            17.8982277 18.3056602 18.7126617 19.1192112 19.5252895 19.9308758 20.3359509 
            20.7404938 21.1444855 21.5479088 21.9507408 22.3529644 22.7545624 23.1555119 
            23.5557976 23.9554024 24.3543034 24.7524872 25.1499329 25.5466251 25.9425468 
            26.3376789 26.7320061 27.1255112 27.518177 27.9099903 28.3009319 28.6909885 
            29.080143 29.46838 29.8556862 30.2420464 30.6274452 31.0118694 31.3953056 
            -13.2210054 -12.8405437 -12.4590178 -12.0764427 -11.6928301 -11.3081932 
            -10.9225464 -10.5359039 -10.1482801 -9.75968933 -9.37014484 -8.97966385 
            -8.58826065 -8.19595051 -7.80274916 -7.40867281 -7.01373768 -6.61796045 
            -6.22135782 -5.82394648 -5.4257431 -5.0267663 -4.62703276 -4.22656059 
            -3.82536745 -3.42347217 -3.0208931 -2.6176486 -2.21375775 -1.80923951 
            -1.40411317 -0.998398125 -0.592113912 -0.185280383 0.222082585 0.629954875 
            1.03831625 1.4471463 1.85642457 2.26613021 2.67624259 3.08674049 3.49760318 
            3.90880919 4.3203373 4.73216629 5.14427471 5.55664062 5.96924305 6.3820591 
            6.79506826 7.20824814 7.62157679 8.03503227 8.44859219 8.86223507 9.27593899 
            9.68968105 10.1034403 10.5171938 10.9309196 11.344595 11.7581997 12.17171 
            12.5851049 12.9983616 13.411459 13.8243742 14.2370863 14.6495733 15.0618134 
            15.4737844 15.8854656 16.2968349 16.7078724 17.1185551 17.5288639 17.9387741 
            18.3482685 18.7573261 19.1659241 19.5740433 19.9816647 20.3887653 20.7953262 
            21.2013283 21.6067505 22.0115757 22.4157829 22.8193531 23.2222672 23.624506 
            24.0260525 24.4268875 24.826992 25.2263508 25.6249428 26.0227528 26.4197617 
            26.8159542 27.2113113 27.6058197 27.9994602 28.3922176 28.7840767 29.1750202 
            29.5650349 29.9541054 30.3422146 30.7293491 31.1154957 31.500639 -13.3349237 
            -12.9528055 -12.5696096 -12.1853485 -11.8000355 -11.4136839 -11.026309 
            -10.6379232 -10.2485418 -9.85817909 -9.46685123 -9.07457161 -8.68135548 
            -8.28722095 -7.8921814 -7.49625444 -7.09945631 -6.70180321 -6.3033123 
            -5.90400124 -5.50388622 -5.10298586 -4.70131779 -4.29890013 -3.895751 
            -3.49188876 -3.08733225 -2.68210053 -2.27621269 -1.8696878 -1.46254551 
            -1.05480564 -0.646487951 -0.237612501 0.171800494 0.581730664 0.9921574 
            1.40306008 1.81441772 2.2262094 2.63841414 3.05101061 3.4639771 3.87729263 
            4.29093504 4.7048831 5.11911488 5.53360844 5.94834137 6.36329222 6.77843904 
            7.19375849 7.60922956 8.02482986 8.44053555 8.8563261 9.2721777 9.68806934 
            10.1039772 10.5198803 10.9357548 11.3515787 11.7673292 12.1829853 12.5985231 
            13.0139217 13.4291573 13.8442087 14.2590532 14.6736698 15.0880346 15.5021276 
            15.915926 16.3294067 16.7425518 17.1553345 17.5677376 17.9797401 18.3913174 
            18.8024502 19.2131176 19.6232986 20.0329723 20.4421196 20.8507175 21.258749 
            21.666193 22.0730286 22.4792366 22.8848 23.2896957 23.6939087 24.0974159 
            24.5002022 24.9022465 25.3035336 25.7040424 26.1037579 26.5026608 26.9007359 
            27.2979641 27.6943283 28.0898132 28.4844017 28.8780804 29.2708282 29.6626358 
            30.0534821 30.4433556 30.8322411 31.2201233 31.6069889 -13.4499331 -13.0661469 
            -12.6812658 -12.2953062 -11.9082794 -11.5201998 -11.1310816 -10.7409382 
            -10.3497849 -9.95763588 -9.56450748 -9.17041397 -8.77537155 -8.37939548 
            -7.98250198 -7.58470774 -7.18602943 -6.78648376 -6.38608789 -5.98485899 
            -5.58281517 -5.1799736 -4.77635288 -4.37197161 -3.96684718 -3.56099939 
            -3.15444684 -2.7472086 -2.33930445 -1.93075347 -1.52157569 -1.11179101 
            -0.701419771 -0.290482193 0.121001236 0.533009768 0.945522606 1.35851872 
            1.77197683 2.18587589 2.60019422 3.01491022 3.43000245 3.84544873 4.26122761 
            4.67731619 5.09369326 5.5103364 5.92722273 6.34432983 6.76163626 7.17911816 
            7.59675407 8.01452065 8.43239498 8.85035515 9.26837826 9.68644047 10.1045198 
            10.5225945 10.9406395 11.358634 11.7765541 12.1943779 12.6120815 13.0296431 
            13.4470406 13.8642502 14.28125 14.6980171 15.1145296 15.5307655 15.946702 
            16.362318 16.7775898 17.1924953 17.6070156 18.0211277 18.4348087 18.8480377 
            19.2607956 19.6730595 20.0848083 20.4960213 20.9066772 21.3167572 21.7262421 
            22.1351089 22.5433388 22.9509125 23.357811 23.7640133 24.1695004 24.5742569 
            24.97826 25.3814926 25.7839375 26.1855774 26.5863914 26.9863644 27.385479 
            27.7837162 28.1810627 28.5774994 28.973011 29.3675804 29.7611942 30.1538334 
            30.5454865 30.9361362 31.3257694 31.7143707 -13.5660486 -13.1805801 -12.7940035 
            -12.4063301 -12.0175762 -11.6277542 -11.2368784 -10.8449631 -10.4520226 
            -10.058073 -9.66312885 -9.26720619 -8.87032032 -8.47248745 -8.07372284 
            -7.67404509 -7.27346992 -6.87201452 -6.46969604 -6.06653261 -5.66254139 
            -5.25774097 -4.85214901 -4.44578505 -4.0386672 -3.63081503 -3.22224712 
            -2.81298304 -2.40304279 -1.99244595 -1.58121264 -1.16936314 -0.756917953 
            -0.3438977 0.0696768165 0.483784616 0.898404539 1.31351519 1.72909522 
            2.14512277 2.56157637 2.97843385 3.39567351 3.81327271 4.23120928 4.64946127 
            5.06800604 5.48682022 5.90588236 6.32516909 6.74465704 7.16432428 7.58414745 
            8.00410366 8.42416954 8.8443222 9.26453781 9.68479443 10.1050692 10.5253372 
            10.9455767 11.3657637 11.7858763 12.2058897 12.625782 13.0455303 13.4651108 
            13.8845015 14.3036785 14.7226191 15.1413012 15.5597029 15.9777994 16.3955708 
            16.8129921 17.2300434 17.6467018 18.0629463 18.4787521 18.8941002 19.3089676 
            19.7233353 20.1371784 20.550478 20.963213 21.3753643 21.7869072 22.1978245 
            22.6080971 23.0177002 23.4266186 23.8348312 24.2423191 24.6490631 25.0550423 
            25.4602413 25.8646393 26.268219 26.6709614 27.0728512 27.4738693 27.8739967 
            28.2732201 28.6715202 29.068882 29.4652882 29.8607254 30.2551727 30.6486206 
            31.04105 31.4324474 31.8227978 -13.6832857 -13.2961226 -12.907835 -12.5184364 
            -12.1279411 -11.7363625 -11.3437147 -10.9500122 -10.5552702 -10.1595049 
            -9.76272964 -9.36496162 -8.96621609 -8.56650925 -8.16585827 -7.76428032 
            -7.36179066 -6.95840836 -6.55414963 -6.14903307 -5.7430768 -5.33629894 
            -4.92871809 -4.52035284 -4.11122227 -3.70134592 -3.29074335 -2.87943387 
            -2.46743774 -2.05477476 -1.64146578 -1.22753096 -0.812991261 -0.397867531 
            0.0178190991 0.434047312 0.850795627 1.26804245 1.68576586 2.10394382 
            2.52255464 2.94157577 3.36098456 3.7807591 4.20087624 4.62131357 5.04204845 
            5.46305752 5.8843174 6.30580616 6.72749949 7.14937449 7.57140779 7.99357653 
            8.41585636 8.83822441 9.26065731 9.68313122 10.1056232 10.5281096 10.9505653 
            11.3729687 11.7952957 12.2175236 12.6396275 13.0615845 13.4833717 13.9049654 
            14.3263426 14.7474804 15.168355 15.5889435 16.0092239 16.4291725 16.8487663 
            17.2679844 17.6868038 18.1051998 18.5231533 18.9406414 19.3576431 19.7741337 
            20.190094 20.6055012 21.0203362 21.434576 21.8481998 22.2611885 22.673521 
            23.0851765 23.4961338 23.9063759 24.3158817 24.7246323 25.1326084 25.5397892 
            25.9461594 26.3516979 26.7563877 27.1602097 27.5631485 27.9651852 28.3663006 
            28.7664814 29.1657104 29.5639687 29.9612427 30.3575153 30.7527695 31.1469936 
            31.5401707 31.9322853 -13.8016605 -13.4127893 -13.0227785 -12.6316404 
            -12.2393894 -11.8460388 -11.4516048 -11.0561008 -10.659543 -10.2619448 
            -9.86332321 -9.46369362 -9.06307316 -8.66147709 -8.25892162 -7.85542583 
            -7.45100498 -7.04567766 -6.63946104 -6.23237371 -5.8244338 -5.4156599 
            -5.00607061 -4.59568548 -4.18452311 -3.77260351 -3.35994625 -2.94657135 
            -2.53249931 -2.11775017 -1.70234466 -1.28630388 -0.869648635 -0.452400267 
            -0.0345802233 0.383789867 0.802688241 1.22209287 1.64198172 2.06233239 
            2.48312259 2.9043293 3.32593036 3.74790263 4.17022324 4.5928688 5.01581669 
            5.43904305 5.86252451 6.28623819 6.71015978 7.1342659 7.55853319 7.98293781 
            8.40745544 8.83206272 9.2567358 9.68145084 10.106184 10.5309105 10.9556074 
            11.3802509 11.8048162 12.2292805 12.6536188 13.0778084 13.5018253 13.9256458 
            14.349247 14.772604 15.195693 15.6184931 16.0409794 16.463129 16.8849182 
            17.306324 17.7273254 18.1478996 18.5680218 18.9876709 19.406826 19.8254623 
            20.2435608 20.6610966 21.0780525 21.4944019 21.9101276 22.3252087 22.7396221 
            23.153347 23.5663662 23.9786568 24.3901997 24.8009758 25.2109661 25.6201496 
            26.0285091 26.4360256 26.84268 27.2484531 27.6533298 28.057291 28.4603176 
            28.8623962 29.2635059 29.6636333 30.0627613 30.4608727 30.8579521 31.2539864 
            31.6489563 32.0428505 -13.9211893 -13.5305967 -13.1388483 -12.7459564 
            -12.3519363 -11.9568005 -11.560565 -11.1632452 -10.7648544 -10.3654089 
            -9.96492481 -9.56341839 -9.16090488 -8.75740242 -8.35292721 -7.94749546 
            -7.54112625 -7.13383627 -6.72564363 -6.31656742 -5.90662527 -5.49583673 
            -5.08421993 -4.67179489 -4.25858116 -3.84459853 -3.42986679 -3.01440644 
            -2.59823775 -2.1813817 -1.76385903 -1.34569108 -0.926899135 -0.507504702 
            -0.0875296444 0.333004147 0.754074574 1.17565918 1.59773576 2.02028131 
            2.44327354 2.86668897 3.29050493 3.71469808 4.13924503 4.5641222 4.98930597 
            5.41477346 5.84049988 6.26646185 6.69263554 7.1189971 7.54552174 7.97218561 
            8.39896488 8.82583523 9.25277233 9.67975235 10.1067495 10.533742 10.9607029 
            11.3876095 11.8144379 12.2411623 12.6677599 13.0942059 13.5204763 13.9465466 
            14.3723946 14.7979946 15.2233229 15.6483564 16.0730705 16.4974442 16.9214516 
            17.3450699 17.7682762 18.1910496 18.6133633 19.0351963 19.4565258 19.8773308 
            20.2975883 20.7172756 21.1363716 21.5548553 21.972702 22.3898945 22.8064098 
            23.2222271 23.6373253 24.0516853 24.4652863 24.8781071 25.2901306 25.7013359 
            26.1117039 26.5212154 26.9298515 27.337595 27.7444267 28.1503296 28.5552845 
            28.9592762 29.3622875 29.7642994 30.1652966 30.5652618 30.9641819 31.3620396 
            31.7588196 32.1545067 -14.0418873 -13.6495609 -13.2560616 -12.8614025 
            -12.4655981 -12.0686626 -11.6706114 -11.2714586 -10.8712206 -10.4699116 
            -10.0675497 -9.66414928 -9.25972748 -8.85430145 -8.44788742 -8.0405035 
            -7.63216734 -7.22289705 -6.81271076 -6.40162659 -5.9896636 -5.57684088 
            -5.16317749 -4.74869347 -4.33340883 -3.91734266 -3.50051618 -3.08294964 
            -2.66466379 -2.24567986 -1.82601881 -1.40570235 -0.984752059 -0.563189864 
            -0.141037807 0.281681806 0.704946518 1.12873375 1.55302048 1.97778404 
            2.40300107 2.82864809 3.25470209 3.68113947 4.10793591 4.53506851 4.96251249 
            5.39024448 5.81823969 6.24647427 6.6749239 7.10356426 7.53237057 7.96131849 
            8.39038372 8.81954098 9.2487669 9.67803478 10.1073217 10.536603 10.9658527 
            11.3950472 11.8241625 12.2531719 12.6820517 13.1107779 13.5393267 13.9676714 
            14.3957891 14.8236561 15.2512474 15.6785383 16.105505 16.5321255 16.958374 
            17.3842278 17.8096619 18.2346554 18.6591835 19.0832233 19.506752 19.9297466 
            20.3521862 20.7740459 21.1953049 21.615942 22.0359325 22.4552574 22.8738956 
            23.2918243 23.7090225 24.1254711 24.5411491 24.9560375 25.3701134 25.7833576 
            26.1957531 26.6072788 27.0179176 27.4276485 27.8364544 28.2443161 28.6512165 
            29.0571384 29.4620647 29.8659782 30.2688618 30.6706982 31.0714741 31.4711723 
            31.8697758 32.2672691 -14.1637726 -13.7696981 -13.3744335 -12.977993 
            -12.58039 -12.1816406 -11.7817583 -11.3807583 -10.9786568 -10.575469 
            -10.1712122 -9.76590157 -9.35955429 -8.95218754 -8.54381752 -8.13446426 
            -7.72414351 -7.31287432 -6.90067482 -6.48756409 -6.07356119 -5.65868521 
            -5.24295616 -4.82639313 -4.40901709 -3.99084759 -3.57190561 -3.15221214 
            -2.73178816 -2.31065488 -1.88883412 -1.46634746 -1.04321706 -0.619464874 
            -0.195113584 0.229814336 0.655296028 1.08130848 1.50782871 1.93483305 
            2.36229825 2.79020071 3.21851635 3.64722133 4.07629156 4.50570297 4.935431 
            5.36545181 5.79574013 6.22627163 6.65702152 7.08796501 7.51907778 7.95033407 
            8.38171005 8.81317902 9.2447176 9.67630005 10.1079006 10.5394955 10.9710588 
            11.402566 11.8339911 12.2653103 12.6964979 13.1275291 13.5583792 13.9890232 
            14.4194365 14.8495932 15.2794714 15.7090435 16.1382885 16.5671787 16.9956913 
            17.4238033 17.85149 18.2787285 18.7054939 19.1317635 19.5575123 19.9827194 
            20.407362 20.8314171 21.2548618 21.6776733 22.0998287 22.5213089 22.942091 
            23.3621521 23.7814713 24.2000294 24.6178055 25.0347767 25.4509258 25.8662319 
            26.280674 26.6942329 27.1068897 27.5186272 27.9294243 28.3392639 28.748127 
            29.1559963 29.5628567 29.9686871 30.3734741 30.7771969 31.1798439 31.5813961 
            31.9818401 32.3811569 -14.2868624 -13.8910255 -13.4939823 -13.095746 
            -12.6963301 -12.2957506 -11.894022 -11.4911594 -11.0871792 -10.6820965 
            -10.2759275 -9.86869049 -9.46040058 -9.05107594 -8.64073372 -8.2293911 
            -7.8170681 -7.40378141 -6.98955059 -6.5743947 -6.15833235 -5.74138355 
            -5.32356834 -4.90490627 -4.48541832 -4.06512499 -3.64404678 -3.22220516 
            -2.79962158 -2.37631774 -1.95231533 -1.52763653 -1.10230362 -0.676339149 
            -0.249765977 0.177393049 0.605114698 1.03337574 1.46215248 1.89142132 
            2.32115841 2.75133967 3.18194103 3.61293793 4.0443058 4.47602081 4.90805769 
            5.34039116 5.77299738 6.2058506 6.63892555 7.07219744 7.50564098 7.93923092 
            8.37294197 8.80674839 9.24062443 9.67454529 10.1084852 10.5424194 10.9763212 
            11.4101658 11.8439274 12.2775803 12.7111006 13.1444616 13.5776386 14.0106058 
            14.4433384 14.8758116 15.3079996 15.7398787 16.171423 16.6026077 17.033411 
            17.4638042 17.8937664 18.3232727 18.7522984 19.1808205 19.6088142 20.0362587 
            20.4631271 20.8893986 21.3150501 21.7400589 22.164402 22.5880585 23.0110054 
            23.4332199 23.8546829 24.2753716 24.6952648 25.1143417 25.5325832 25.9499683 
            26.3664761 26.7820873 27.1967831 27.6105442 28.0233517 28.4351864 28.8460312 
            29.255867 29.6646767 30.0724411 30.479147 30.8847752 31.2893085 31.6927319 
            32.0950279 32.4961853 -14.4111729 -14.0135612 -13.6147251 -13.2146778 
            -12.8134346 -12.4110098 -12.0074196 -11.6026793 -11.1968031 -10.7898092 
            -10.3817129 -9.97253132 -9.56228161 -9.1509819 -8.73864841 -8.32530022 
            -7.91095543 -7.49563313 -7.0793519 -6.66213083 -6.24398947 -5.82494831 
            -5.40502691 -4.98424578 -4.56262541 -4.14018679 -3.71695137 -3.29294038 
            -2.86817551 -2.44267917 -2.01647305 -1.58957958 -1.16202176 -0.733822227 
            -0.305004209 0.124409057 0.554394066 0.984927058 1.41598415 1.84754133 
            2.27957439 2.71205878 3.14496994 3.57828331 4.01197386 4.44601679 4.88038683 
            5.31505871 5.75000715 6.18520689 6.62063265 7.0562582 7.49205828 7.92800665 
            8.36407852 8.80024719 9.23648643 9.67277241 10.1090765 10.5453749 10.9816408 
            11.4178476 11.8539715 12.2899847 12.7258625 13.1615782 13.5971069 14.032423 
            14.4674997 14.9023132 15.3368378 15.7710476 16.2049179 16.638422 17.071537 
            17.5042381 17.9365005 18.3682976 18.7996082 19.2304058 19.6606693 20.0903702 
            20.5194893 20.948 21.3758831 21.8031101 22.2296638 22.6555176 23.0806503 
            23.5050411 23.9286671 24.3515072 24.7735386 25.1947422 25.615097 26.0345802 
            26.4531746 26.8708572 27.287611 27.7034149 28.1182518 28.5321007 28.9449425 
            29.3567619 29.7675381 30.1772575 30.5858974 30.9934444 31.3998814 31.8051929 
            32.2093582 32.6123695 -14.5367212 -14.1373205 -13.7366772 -13.3348055 
            -12.9317198 -12.5274363 -12.1219683 -11.715333 -11.3075466 -10.8986235 
            -10.4885836 -10.0774403 -9.66521358 -9.2519207 -8.83757782 -8.42220592 
            -8.00582123 -7.58844376 -7.17009258 -6.75078726 -6.33054733 -5.90939331 
            -5.48734522 -5.06442404 -4.64065027 -4.21604538 -3.79063129 -3.36442924 
            -2.93746138 -2.50975013 -2.0813179 -1.65218723 -1.22238159 -0.791923881 
            -0.360837698 0.0708533227 0.50312531 0.935954273 1.36931574 1.80318558 
            2.23753881 2.67235088 3.10759664 3.54325128 3.97928929 4.41568518 4.85241413 
            5.28944969 5.72676611 6.16433811 6.60213947 7.04014444 7.47832632 7.91665983 
            8.3551178 8.79367447 9.23230362 9.6709795 10.1096745 10.5483627 10.9870186 
            11.4256144 11.8641253 12.3025246 12.7407856 13.1788816 13.6167879 14.0544777 
            14.4919252 14.9291048 15.3659906 15.802556 16.2387753 16.6746254 17.1100788 
            17.5451107 17.9796963 18.4138107 18.8474293 19.280529 19.7130814 20.1450672 
            20.576458 21.0072327 21.4373665 21.8668385 22.2956219 22.7236977 23.1510391 
            23.5776272 24.0034389 24.4284496 24.8526421 25.2759933 25.6984806 26.1200829 
            26.5407829 26.9605579 27.3793888 27.7972546 28.214138 28.6300201 29.0448799 
            29.4587002 29.8714619 30.2831478 30.6937428 31.1032257 31.5115833 31.9187965 
            32.3248482 32.7297287 -14.6635275 -14.2623234 -13.8598585 -13.4561472 
            -13.0512047 -12.6450453 -12.2376842 -11.8291388 -11.4194241 -11.0085573 
            -10.5965548 -10.1834345 -9.76921272 -9.35390854 -8.9375391 -8.52012253 
            -8.1016798 -7.68222809 -7.26178789 -6.84037828 -6.41801977 -5.99473238 
            -5.57053709 -5.14545488 -4.71950674 -4.29271412 -3.86509919 -3.43668413 
            -3.00749087 -2.57754207 -2.14686084 -1.71547019 -1.28339338 -0.850654125 
            -0.417276084 0.016716579 0.451299697 0.886448801 1.32213914 1.75834608 
            2.19504452 2.6322093 3.06981492 3.50783587 3.94624662 4.38502169 4.82413435 
            5.26355886 5.70326948 6.14323997 6.58344316 7.0238533 7.46444368 7.90518761 
            8.34605885 8.78703022 9.22807503 9.66916656 10.1102781 10.551384 10.9924555 
            11.4334669 11.8743916 12.3152018 12.7558727 13.1963758 13.6366863 14.0767765 
            14.5166197 14.9561911 15.395463 15.8344097 16.2730064 16.7112255 17.1490421 
            17.5864296 18.023365 18.4598198 18.8957729 19.3311958 19.7660637 20.2003555 
            20.6340427 21.0671043 21.4995155 21.9312534 22.3622913 22.7926102 23.2221832 
            23.6509895 24.0790081 24.5062141 24.9325867 25.3581047 25.7827473 26.2064915 
            26.6293163 27.0512028 27.4721298 27.8920784 28.3110294 28.72896 29.1458549 
            29.5616951 29.9764595 30.3901329 30.8026981 31.2141342 31.6244259 32.0335579 
            32.4415131 32.8482742 -14.7916088 -14.388587 -13.9842863 -13.578721 -13.1719055 
            -12.763855 -12.3545856 -11.9441137 -11.5324554 -11.119627 -10.7056456 
            -10.2905293 -9.87429428 -9.45696068 -9.03854561 -8.61906815 -8.19854641 
            -7.77700138 -7.35445213 -6.93091822 -6.50642061 -6.08097935 -5.65461588 
            -5.22735119 -4.79920721 -4.37020493 -3.9403677 -3.50971675 -3.07827568 
            -2.64606667 -2.21311355 -1.77943921 -1.34506774 -0.910023034 -0.474329203 
            -0.038010627 0.398908019 0.836401939 1.27444601 1.7130152 2.15208387 
            2.59162664 3.0316174 3.47203064 3.91284013 4.35401964 4.79554272 5.23738289 
            5.67951345 6.12190819 6.56453991 7.00738192 7.45040703 7.89358854 8.3368988 
            8.78031158 9.22379875 9.6673336 10.1108894 10.5544376 10.9979525 11.4414053 
            11.8847704 12.3280201 12.7711267 13.2140636 13.6568041 14.0993204 14.5415869 
            14.9835749 15.4252605 15.8666143 16.3076134 16.7482262 17.1884327 17.6282024 
            18.0675106 18.5063343 18.944643 19.3824158 19.8196239 20.2562466 20.692255 
            21.1276283 21.5623398 21.9963646 22.4296818 22.8622665 23.2940941 23.7251415 
            24.1553898 24.5848122 25.0133877 25.4410954 25.8679123 26.2938156 26.7187881 
            27.142807 27.5658512 27.9879017 28.4089355 28.8289375 29.2478867 29.6657639 
            30.08255 30.4982281 30.9127789 31.3261871 31.7384319 32.149498 32.5593719 
            32.9680328 -14.9209833 -14.5161304 -14.1099787 -13.7025442 -13.2938404 
            -12.8838844 -12.4726906 -12.0602751 -11.646656 -11.2318487 -10.8158712 
            -10.3987408 -9.98047638 -9.56109428 -9.14061451 -8.71905613 -8.29643726 
            -7.87277937 -7.44810057 -7.02242231 -6.59576464 -6.16814899 -5.73959589 
            -5.31012726 -4.87976551 -4.44853163 -4.01644897 -3.5835402 -3.14982796 
            -2.71533585 -2.28008699 -1.8441056 -1.40741551 -0.970041156 -0.532007039 
            -0.0933379605 0.345941067 0.785804868 1.22622788 1.66718471 2.10864925 
            2.55059576 2.99299788 3.43582916 3.87906361 4.3226738 4.76663351 5.21091604 
            5.65549374 6.10033941 6.54542685 6.99072742 7.43621445 7.88186026 8.32763767 
            8.77351856 9.21947575 9.66548061 10.1115074 10.5575266 11.0035105 11.4494333 
            11.8952656 12.3409805 12.7865505 13.2319479 13.677145 14.1221151 14.5668306 
            15.0112638 15.4553881 15.8991766 16.3426018 16.7856388 17.2282581 17.6704369 
            18.1121445 18.5533581 18.994051 19.4341984 19.8737736 20.3127499 20.7511044 
            21.1888123 21.6258469 22.0621872 22.4978046 22.9326782 23.3667831 23.8000965 
            24.2325954 24.664257 25.0950565 25.5249748 25.953989 26.3820744 26.8092136 
            27.2353859 27.6605663 28.0847378 28.5078773 28.9299698 29.3509903 29.7709236 
            30.1897488 30.6074486 31.0240059 31.4393997 31.8536148 32.2666359 32.6784401 
            33.0890198 -15.051671 -14.6449718 -14.2369556 -13.8276358 -13.4170294 
            -13.0051498 -12.5920153 -12.1776409 -11.762044 -11.3452415 -10.9272499 
            -10.5080881 -10.0877743 -9.66632652 -9.24376297 -8.8201046 -8.39536858 
            -7.96957731 -7.5427494 -7.11490583 -6.6860671 -6.25625515 -5.82549143 
            -5.3937974 -4.96119499 -4.52770758 -4.09335709 -3.65816712 -3.22216058 
            -2.78536129 -2.34779334 -1.90948057 -1.47044754 -1.03071904 -0.590319872 
            -0.149275288 0.292389363 0.734648407 1.17747605 1.62084627 2.06473279 
            2.50910926 2.95394874 3.399225 3.84491062 4.29097891 4.73740244 5.18415356 
            5.63120556 6.07852983 6.52609968 6.97388649 7.42186308 7.87000084 8.31827259 
            8.76664925 9.21510315 9.66360664 10.1121311 10.5606489 11.0091314 11.457551 
            11.9058781 12.3540869 12.8021469 13.2500324 13.6977139 14.1451645 14.5923567 
            15.0392609 15.4858522 15.9321012 16.3779812 16.8234653 17.268528 17.7131386 
            18.1572742 18.6009045 19.0440063 19.4865532 19.9285183 20.3698769 20.8106022 
            21.2506695 21.690052 22.1287289 22.5666714 23.0038586 23.4402637 23.8758659 
            24.3106384 24.7445602 25.1776085 25.6097584 26.0409908 26.4712811 26.90061 
            27.3289528 27.7562923 28.1826038 28.6078701 29.0320702 29.455183 29.8771915 
            30.2980747 30.7178154 31.1363926 31.553793 31.9699955 32.3849831 32.7987404 
            33.2112465 -15.183691 -14.7751312 -14.3652344 -13.9540157 -13.5414896 
            -13.1276722 -12.7125807 -12.2962303 -11.8786383 -11.4598227 -11.0397997 
            -10.6185884 -10.1962061 -9.77267361 -9.3480072 -8.92222881 -8.49535656 
            -8.06741142 -7.63841343 -7.20838356 -6.77734327 -6.34531403 -5.91231728 
            -5.47837543 -5.04351044 -4.60774612 -4.17110491 -3.73361015 -3.29528594 
            -2.85615587 -2.41624427 -1.9755758 -1.53417516 -1.0920676 -0.649278224 
            -0.205832705 0.238243163 0.682923377 1.12818158 1.57399154 2.02032638 
            2.46715927 2.91446328 3.36221123 3.81037545 4.25892878 4.7078433 5.15709114 
            5.60664415 6.05647516 6.50655508 6.95685625 7.40735006 7.85800791 8.30880165 
            8.75970268 9.21068192 9.66171169 10.1127634 10.5638075 11.0148153 11.4657593 
            11.9166107 12.3673401 12.8179197 13.2683201 13.7185144 14.1684732 14.6181688 
            15.0675726 15.5166578 15.965395 16.4137573 16.8617172 17.3092461 17.7563171 
            18.2029057 18.6489811 19.0945187 19.5394897 19.9838715 20.4276352 20.8707561 
            21.3132076 21.7549648 22.196003 22.6362953 23.0758209 23.5145512 23.9524632 
            24.389534 24.8257389 25.2610569 25.6954632 26.1289349 26.561451 26.9929886 
            27.4235268 27.8530426 28.281517 28.7089272 29.1352558 29.5604801 29.9845829 
            30.4075432 30.8293419 31.2499599 31.6693821 32.0875893 32.5045624 32.9202843 
            33.3347397 -15.3170624 -14.9066277 -14.4948359 -14.0817022 -13.6672411 
            -13.2514696 -12.834404 -12.4160604 -11.9964571 -11.5756102 -11.1535378 
            -10.730258 -10.3057899 -9.8801527 -9.45336533 -9.02544689 -8.59641743 
            -8.16629791 -7.73510933 -7.30287266 -6.86960888 -6.43533993 -6.00008821 
            -5.56387615 -5.12672615 -4.68866158 -4.24970627 -3.80988312 -3.36921692 
            -2.92773175 -2.48545218 -2.04240322 -1.59860992 -1.15409791 -0.708892763 
            -0.263020515 0.183492616 0.630620182 1.07833552 1.5266118 1.97542179 
            2.42473841 2.87453389 3.3247807 3.77545118 4.2265172 4.67795038 5.1297226 
            5.58180571 6.0341711 6.4867897 6.93963337 7.39267254 7.84587908 8.2992239 
            8.75267696 9.20621109 9.65979576 10.1134024 10.5670013 11.0205641 11.474061 
            11.9274645 12.380743 12.8338699 13.2868147 13.7395496 14.1920452 14.6442728 
            15.0962038 15.5478106 15.9990635 16.4499359 16.9003983 17.3504219 17.7999821 
            18.2490482 18.6975956 19.1455936 19.5930195 20.0398426 20.4860382 20.9315796 
            21.376442 21.8205986 22.2640228 22.7066898 23.1485748 23.5896549 24.0299015 
            24.4692936 24.9078064 25.345417 25.7821007 26.2178364 26.6525993 27.0863686 
            27.5191212 27.9508362 28.3814926 28.8110695 29.2395458 29.6669006 30.0931168 
            30.5181713 30.9420471 31.3647251 31.7861881 32.2064171 32.6253929 33.0430984 
            33.4595184 -15.451807 -15.0394821 -14.6257792 -14.2107143 -13.7943029 
            -13.3765612 -12.9575052 -12.5371523 -12.1155186 -11.6926231 -11.2684832 
            -10.8431168 -10.416544 -9.98878288 -9.5598526 -9.12977505 -8.69856834 
            -8.26625443 -7.83285379 -7.39838839 -6.96287918 -6.52634907 -6.0888195 
            -5.65031433 -5.21085596 -4.77046824 -4.32917452 -3.88699961 -3.4439671 
            -3.00010204 -2.5554297 -2.10997486 -1.66376352 -1.21682131 -0.769174397 
            -0.32084927 0.128127575 0.577729225 1.02792859 1.47869825 1.9300108 2.38183832 
            2.83415318 3.28692698 3.74013138 4.19373798 4.64771843 5.10204363 5.55668497 
            6.01161337 6.46679926 6.92221403 7.37782812 7.83361197 8.28953648 8.74557209 
            9.20168877 9.65785694 10.114048 10.5702314 11.0263777 11.4824581 11.9384413 
            12.3942995 12.8500023 13.3055201 13.7608242 14.2158852 14.6706734 15.1251602 
            15.5793161 16.0331135 16.4865227 16.9395161 17.3920631 17.8441372 18.2957115 
            18.7467556 19.1972446 19.6471481 20.0964413 20.5450954 20.993084 21.440382 
            21.8869629 22.332798 22.7778645 23.2221375 23.6655884 24.1081963 24.5499325 
            24.9907761 25.4307022 25.869688 26.3077068 26.7447395 27.1807632 27.6157532 
            28.0496883 28.4825478 28.9143105 29.3449554 29.7744617 30.2028103 30.6299801 
            31.0559521 31.4807072 31.9042282 32.3264961 32.7474899 33.1671982 33.585598 
            -15.5879431 -15.1737137 -14.7580853 -14.341074 -13.9226961 -13.5029669 
            -13.0819044 -12.659523 -12.2358427 -11.8108807 -11.384654 -10.9571829 
            -10.5284853 -10.0985813 -9.66749001 -9.2352314 -8.80182743 -8.36729717 
            -7.93166351 -7.49494743 -7.05717134 -6.6183567 -6.17852736 -5.73770571 
            -5.2959156 -4.85318041 -4.40952492 -3.96497321 -3.51954985 -3.0732801 
            -2.62618923 -2.17830324 -1.72964787 -1.28024948 -0.830134451 -0.379329711 
            0.0721376985 0.524240494 0.976951122 1.43024182 1.88408458 2.33845115 
            2.79331326 3.24864221 3.70440936 4.1605854 4.61714172 5.074049 5.53127718 
            5.98879766 6.44658041 6.90459585 7.36281395 7.82120466 8.27973843 8.7383852 
            9.19711494 9.65589714 10.1147013 10.5734987 11.032258 11.4909506 11.949544 
            12.4080105 12.8663187 13.324439 13.782342 14.2399969 14.6973753 15.1544466 
            15.6111822 16.0675526 16.5235271 16.9790783 17.4341774 17.8887959 18.3429031 
            18.7964745 19.2494793 19.701889 20.153677 20.6048164 21.0552807 21.5050392 
            21.954071 22.4023438 22.8498363 23.2965183 23.7423687 24.1873589 24.6314659 
            25.0746651 25.5169296 25.9582386 26.3985672 26.8378925 27.2761898 27.7134399 
            28.1496181 28.5847015 29.018671 29.4515057 29.8831825 30.3136826 30.7429867 
            31.1710739 31.5979252 32.0235214 32.4478455 32.8708763 33.2926025 33.7130013 
            -15.7254925 -15.3093433 -14.8917742 -14.4728012 -14.0524406 -13.6307077 
            -13.2076197 -12.7831945 -12.3574495 -11.9304018 -11.5020704 -11.0724754 
            -10.641634 -10.2095661 -9.7762928 -9.34183502 -8.9062109 -8.46944427 
            -8.03155613 -7.59256697 -7.15250111 -6.71138 -6.26922703 -5.82606602 
            -5.38191986 -4.93681383 -4.49077177 -4.04381847 -3.59597898 -3.14727902 
            -2.69774437 -2.247401 -1.79627538 -1.34439421 -0.891784251 -0.438472897 
            0.0155124022 0.470143914 0.925393641 1.38123333 1.83763444 2.29456854 
            2.75200653 3.20991945 3.66827798 4.12705278 4.58621407 5.0457325 5.50557756 
            5.96572018 6.42612886 6.88677454 7.34762669 7.80865431 8.26982784 8.73111534 
            9.19248772 9.6539135 10.1153631 10.5768042 11.0382071 11.4995403 11.9607754 
            12.4218798 12.882823 13.3435755 13.8041067 14.2643862 14.7243843 15.1840696 
            15.6434126 16.1023846 16.560955 17.0190945 17.4767742 17.9339638 18.3906345 
            18.8467579 19.3023071 19.7572517 20.2115631 20.6652145 21.1181793 21.5704269 
            22.0219345 22.4726715 22.9226151 23.3717346 23.8200073 24.2674065 24.7139072 
            25.1594849 25.6041145 26.0477715 26.4904308 26.9320717 27.3726673 27.8121967 
            28.250639 28.6879692 29.1241665 29.5592117 29.9930801 30.4257526 30.8572083 
            31.2874298 31.7163963 32.1440887 32.5704842 32.995575 33.4193306 33.8417435 
            -15.8644772 -15.446393 -15.0268669 -14.605916 -14.1835556 -13.7598028 
            -13.3346739 -12.908186 -12.4803581 -12.0512066 -11.6207523 -11.1890125 
            -10.7560081 -10.3217583 -9.88628197 -9.44960213 -9.01173878 -8.57271385 
            -8.13254738 -7.69126415 -7.24888563 -6.8054347 -6.36093521 -5.91541052 
            -5.46888494 -5.02138281 -4.57292938 -4.12354946 -3.67326856 -3.22211289 
            -2.77010822 -2.31728125 -1.86365867 -1.40926766 -0.954135537 -0.498290062 
            -0.0417591333 0.415429056 0.873246074 1.33166325 1.79065156 2.25018191 
            2.71022487 3.17075109 3.63173056 4.09313345 4.55492973 5.01708937 5.47958136 
            5.94237518 6.40544081 6.86874723 7.33226347 7.795959 8.25980186 8.72376156 
            9.18780708 9.65190792 10.1160316 10.5801468 11.0442238 11.5082312 11.9721365 
            12.4359093 12.899519 13.3629341 13.8261242 14.2890577 14.7517042 15.2140341 
            15.6760159 16.137619 16.598814 17.0595703 17.5198593 17.9796486 18.4389114 
            18.8976192 19.3557396 19.8132458 20.2701092 20.7263012 21.1817932 21.6365566 
            22.0905685 22.5437965 22.9962158 23.4477978 23.8985195 24.3483543 24.7972736 
            25.2452545 25.6922722 26.1382999 26.5833149 27.0272923 27.470211 27.9120445 
            28.3527718 28.7923698 29.2308178 29.6680908 30.1041718 30.5390377 30.9726677 
            31.4050426 31.8361416 32.2659454 32.6944389 33.1215973 33.5474091 33.9718513 
            -16.0049191 -15.5848837 -15.1633863 -14.7404404 -14.3160639 -13.890274 
            -13.4630861 -13.0345182 -12.6045885 -12.173316 -11.7407188 -11.3068161 
            -10.8716278 -10.4351749 -9.99747658 -9.5585537 -9.11842823 -8.67712212 
            -8.23465824 -7.79105711 -7.34634256 -6.90053844 -6.45366859 -6.00575638 
            -5.55682611 -5.10690355 -4.65601349 -4.20418167 -3.75143337 -3.29779553 
            -2.84329438 -2.38795686 -1.93181026 -1.47488213 -1.01720023 -0.55879277 
            -0.0996879786 0.360085368 0.820498407 1.28152192 1.74312651 2.20528245 
            2.66796017 3.13112926 3.5947597 4.05882072 4.52328205 4.98811293 5.45328236 
            5.91875935 6.38451195 6.85051012 7.31672144 7.78311539 8.24965954 8.71632195 
            9.18307304 9.6498785 10.1167078 10.5835295 11.0503111 11.5170221 11.9836292 
            12.4501028 12.9164085 13.3825178 13.8483973 14.3140154 14.7793427 15.2443466 
            15.7089968 16.1732616 16.6371117 17.1005154 17.5634422 18.0258617 18.4877472 
            18.9490643 19.4097862 19.8698826 20.3293266 20.7880859 21.2461338 21.7034416 
            22.1599827 22.6157284 23.070652 23.524725 23.9779205 24.4302139 24.8815784 
            25.3319874 25.7814159 26.2298412 26.6772346 27.1235752 27.5688381 28.0129986 
            28.4560337 28.8979225 29.3386402 29.7781658 30.2164803 30.6535587 31.0893822 
            31.5239296 31.9571819 32.3891182 32.8197212 33.2489738 33.6768532 34.103344 
            -16.1468391 -15.7248383 -15.3013515 -14.8763962 -14.4499874 -14.0221424 
            -13.5928774 -13.1622124 -12.7301626 -12.2967491 -11.86199 -11.4259052 
            -10.9885139 -10.5498362 -10.1098938 -9.66870785 -9.22629929 -8.78269005 
            -8.33790398 -7.89196253 -7.44488955 -6.99670887 -6.54744387 -6.09711933 
            -5.64576054 -5.19339228 -4.74003983 -4.28572989 -3.83048797 -3.37434149 
            -2.91731691 -2.45944166 -2.00074363 -1.54125059 -1.08099067 -0.619992733 
            -0.158285454 0.304102004 0.76714021 1.23079944 1.69505 2.15986156 2.62520385 
            3.09104609 3.55735779 4.02410793 4.4912653 4.95879841 5.42667627 5.89486694 
            6.36333847 6.83205938 7.30099773 7.7701211 8.239398 8.70879555 9.17828178 
            9.64782524 10.1173925 10.5869513 11.0564699 11.5259161 11.9952574 12.4644623 
            12.9334965 13.4023304 13.8709307 14.3392658 14.8073034 15.275013 15.742362 
            16.2093201 16.6758556 17.1419353 17.6075325 18.0726128 18.5371475 19.0011063 
            19.4644585 19.9271755 20.389225 20.8505821 21.3112144 21.7710953 22.2301941 
            22.6884842 23.145937 23.6025257 24.0582237 24.5130024 24.9668369 25.4197006 
            25.8715668 26.3224125 26.7722111 27.2209358 27.6685658 28.1150761 28.5604439 
            29.0046444 29.4476547 29.8894558 30.3300228 30.7693348 31.2073708 31.6441116 
            32.0795364 32.5136261 32.9463577 33.3777199 33.8076859 34.2362442 -16.2902584 
            -15.8662777 -15.4407873 -15.0138054 -14.5853472 -14.1554298 -13.7240715 
            -13.2912893 -12.8571024 -12.4215288 -11.9845877 -11.5462999 -11.1066847 
            -10.6657629 -10.2235556 -9.78008366 -9.33537006 -8.88943672 -8.44230556 
            -7.99400043 -7.5445447 -7.09396267 -6.64227867 -6.1895175 -5.73570395 
            -5.28086424 -4.82502413 -4.36820936 -3.9104476 -3.4517653 -2.99219012 
            -2.53174973 -2.070472 -1.60838568 -1.14551938 -0.681902051 -0.217563123 
            0.247467801 0.713160813 1.1794858 1.64641237 2.11390972 2.58194733 3.05049372 
            3.51951766 3.98898768 4.45887232 4.92913961 5.39975691 5.87069321 6.34191513 
            6.81339121 7.28508806 7.75697374 8.22901535 8.70118046 9.17343521 9.64574718 
            10.1180849 10.590414 11.0627012 11.5349159 12.0070229 12.4789906 12.9507856 
            13.4223766 13.8937292 14.3648129 14.8355932 15.3060398 15.7761202 16.2458019 
            16.7150517 17.1838417 17.6521378 18.1199093 18.5871239 19.0537529 19.5197659 
            19.9851322 20.4498215 20.9138031 21.3770485 21.839529 22.3012142 22.7620754 
            23.2220879 23.6812191 24.1394463 24.5967369 25.0530682 25.5084114 25.9627399 
            26.4160309 26.8682575 27.3193932 27.7694149 28.218298 28.6660194 29.1125546 
            29.5578804 30.001976 30.4448185 30.8863869 31.3266563 31.7656116 32.203228 
            32.6394882 33.0743713 33.5078583 33.93993 34.3705711 -16.4352036 -16.0092258 
            -15.5817156 -15.1526899 -14.7221651 -14.2901583 -13.8566885 -13.421771 
            -12.9854279 -12.5476751 -12.1085329 -11.6680222 -11.2261629 -10.7829752 
            -10.3384819 -9.89270306 -9.44566154 -8.9973793 -8.54788017 -8.097188 
            -7.64532614 -7.19231892 -6.73819113 -6.28296757 -5.82667446 -5.36933708 
            -4.91098261 -4.45163679 -3.99132776 -3.53008246 -3.06792855 -2.60489464 
            -2.14100909 -1.67630088 -1.21079898 -0.744533002 -0.277532846 0.190171435 
            0.658549488 1.12757063 1.59720385 2.0674181 2.53818178 3.00946355 3.48123145 
            3.9534533 4.42609692 4.89912987 5.37251949 5.84623337 6.32023859 6.79450178 
            7.26899004 7.74367046 8.21850967 8.69347382 9.16853046 9.64364529 10.1187859 
            10.5939169 11.0690069 11.5440216 12.0189276 12.4936914 12.9682798 13.4426603 
            13.9167986 14.3906622 14.8642178 15.3374338 15.810276 16.2827129 16.7547112 
            17.2262402 17.6972675 18.1677589 18.6376877 19.1070175 19.5757217 20.043766 
            20.5111237 20.9777603 21.4436474 21.9087563 22.3730564 22.8365192 23.299118 
            23.7608204 24.2216015 24.6814327 25.1402855 25.598135 26.0549526 26.5107155 
            26.9653931 27.4189644 27.8714027 28.3226814 28.7727814 29.221674 29.6693382 
            30.1157513 30.5608902 31.004734 31.4472599 31.8884468 32.3282776 32.7667274 
            33.2037773 33.6394081 34.0736046 34.5063477 -16.5816975 -16.1537056 -15.7241592 
            -15.2930737 -14.860465 -14.4263515 -13.9907513 -13.5536814 -13.1151609 
            -12.67521 -12.2338476 -11.7910938 -11.3469687 -10.901495 -10.4546928 
            -10.0065842 -9.55719185 -9.10653973 -8.65464973 -8.20154572 -7.74725294 
            -7.29179573 -6.8351984 -6.37748766 -5.9186883 -5.4588275 -4.99793196 
            -4.53602791 -4.07314396 -3.60930777 -3.14454746 -2.67889142 -2.2123692 
            -1.74500966 -1.27684271 -0.807898283 -0.338206768 0.132201299 0.603294969 
            1.07504308 1.5474143 2.02037668 2.49389839 2.96794724 3.44249105 3.91749668 
            4.39293194 4.86876345 5.34495783 5.82148266 6.2983036 6.77538729 7.25270033 
            7.73020887 8.20787907 8.68567657 9.16356754 9.64151859 10.1194944 10.5974627 
            11.075388 11.553236 12.0309744 12.5085678 12.9859829 13.4631853 13.9401417 
            14.4168186 14.8931828 15.3691998 15.8448372 16.3200626 16.7948399 17.2691402 
            17.7429295 18.216177 18.6888466 19.1609116 19.6323357 20.1030903 20.5731449 
            21.0424652 21.5110245 21.9787922 22.4457359 22.911829 23.3770409 23.8413429 
            24.3047066 24.7671051 25.228508 25.6888885 26.148222 26.6064816 27.0636387 
            27.5196686 27.9745464 28.4282475 28.8807468 29.3320217 29.7820473 30.2308006 
            30.6782589 31.1243992 31.5692005 32.0126419 32.4547043 32.8953629 33.3346024 
            33.7723999 34.2087364 34.6435966 -16.7297611 -16.2997417 -15.8681421 
            -15.4349794 -15.0002708 -14.5640326 -14.1262836 -13.6870422 -13.2463264 
            -12.8041573 -12.3605537 -11.9155359 -11.4691248 -11.0213423 -10.5722094 
            -10.1217489 -9.66998386 -9.21693707 -8.76263237 -8.30709362 -7.85034466 
            -7.39241219 -6.93332052 -6.47309589 -6.01176453 -5.54935312 -5.08588886 
            -4.6213994 -4.15591288 -3.68945742 -3.22206163 -2.75375485 -2.28456616 
            -1.81452596 -1.34366393 -0.872010767 -0.399597257 0.0735454857 0.54738605 
            1.02189267 1.49703336 1.97277594 2.44908786 2.92593622 3.40328836 3.88111091 
            4.35937071 4.83803368 5.31706619 5.79643488 6.2761054 6.75604343 7.23621511 
            7.71658516 8.19711971 8.67778492 9.15854454 9.6393652 10.1202126 10.6010504 
            11.0818453 11.562562 12.0431662 12.5236225 13.0038977 13.4839563 13.9637651 
            14.4432888 14.9224939 15.4013462 15.8798122 16.3578568 16.8354492 17.3125534 
            17.7891369 18.2651691 18.7406139 19.2154427 19.6896191 20.1631145 20.6358967 
            21.107935 21.579195 22.0496502 22.519268 22.9880199 23.4558754 23.9228039 
            24.3887787 24.8537712 25.3177509 25.7806911 26.2425671 26.7033482 27.1630096 
            27.6215248 28.0788689 28.5350151 28.9899406 29.4436188 29.8960285 30.3471432 
            30.7969437 31.2454033 31.692503 32.1382217 32.5825348 33.0254211 33.4668655 
            33.9068489 34.3453445 34.782341 -16.8794212 -16.4473572 -16.013689 -15.5784321 
            -15.1416044 -14.7032242 -14.2633085 -13.8218756 -13.3789463 -12.9345388 
            -12.4886732 -12.0413704 -11.5926523 -11.14254 -10.6910543 -10.2382193 
            -9.78405762 -9.32859325 -8.87184906 -8.41384983 -7.95462084 -7.49418736 
            -7.03257513 -6.56981039 -6.10592031 -5.64093113 -5.17487144 -4.70776844 
            -4.23965073 -3.77054715 -3.30048704 -2.82949972 -2.35761523 -1.88486397 
            -1.41127634 -0.936883628 -0.46171701 0.0141918268 0.490810931 0.968108058 
            1.44605064 1.92460585 2.40374064 2.88342166 3.36361551 3.84428811 4.3254056 
            4.80693436 5.28883886 5.77108574 6.2536397 6.73646641 7.21953058 7.70279741 
            8.18623161 8.6697979 9.15346146 9.637187 10.1209383 10.604681 11.0883799 
            11.5719995 12.0555048 12.5388594 13.0220289 13.5049791 13.9876738 14.4700785 
            14.952158 15.4338789 15.9152069 16.3961067 16.876543 17.3564854 17.8358974 
            18.3147469 18.7929993 19.2706242 19.7475853 20.2238541 20.6993942 21.1741791 
            21.6481724 22.1213455 22.593668 23.0651073 23.535635 24.0052204 24.473835 
            24.9414482 25.4080334 25.8735619 26.3380051 26.8013344 27.2635269 27.7245522 
            28.1843872 28.6430054 29.1003799 29.5564861 30.0113029 30.4648037 30.9169674 
            31.3677692 31.8171883 32.2652016 32.7117882 33.1569252 33.6005974 34.0427818 
            34.4834557 34.9226074 -17.0307026 -16.5965786 -16.1608238 -15.7234564 
            -15.2844925 -14.8439512 -14.4018497 -13.9582071 -13.5130434 -13.0663776 
            -12.6182299 -12.168622 -11.7175741 -11.2651091 -10.8112497 -10.3560171 
            -9.89943504 -9.44152832 -8.98231983 -8.52183628 -8.06010151 -7.59714174 
            -7.13298273 -6.66765118 -6.20117474 -5.73358059 -5.26489687 -4.79515171 
            -4.32437468 -3.8525939 -3.37983966 -2.906142 -2.43153119 -1.95603824 
            -1.47969413 -1.00253046 -0.524579048 -0.0458721444 0.433557779 0.913677931 
            1.39445519 1.87585604 2.35784721 2.84039426 3.32346344 3.80702019 4.29102993 
            4.77545834 5.26026964 5.74542952 6.23090172 6.71665192 7.20264387 7.68884182 
            8.17521095 8.6617136 9.14831638 9.63498116 10.1216736 10.6083565 11.0949945 
            11.5815525 12.0679932 12.5542812 13.0403805 13.5262556 14.0118713 14.4971914 
            14.9821815 15.4668055 15.9510288 16.4348164 16.9181347 17.4009476 17.8832207 
            18.3649197 18.846014 19.3264656 19.8062458 20.2853184 20.7636509 21.2412128 
            21.7179699 22.1938934 22.6689491 23.1431065 23.6163368 24.0886078 24.5598907 
            25.0301552 25.4993725 25.9675159 26.4345551 26.9004612 27.3652096 27.8287735 
            28.2911243 28.7522354 29.2120857 29.6706448 30.1278934 30.5838032 31.038353 
            31.491518 31.9432774 32.3936081 32.8424873 33.2898979 33.7358131 34.1802216 
            34.6230927 35.0644188 -17.18363 -16.7474289 -16.3095722 -15.8700752 -15.4289589 
            -14.9862375 -14.5419321 -14.0960608 -13.6486425 -13.1996984 -12.7492476 
            -12.2973127 -11.843914 -11.3890743 -10.9328165 -10.4751625 -10.0161371 
            -9.5557642 -9.09406757 -8.63107395 -8.16680717 -7.7012949 -7.2345624 
            -6.76663733 -6.29754734 -5.8273201 -5.35598373 -4.88356781 -4.41010141 
            -3.93561387 -3.4601357 -2.98369718 -2.50632954 -2.02806354 -1.54893148 
            -1.06896496 -0.588196695 -0.106659189 0.375614375 0.858590662 1.34223592 
            1.82651627 2.31139731 2.79684472 3.2828238 3.76929927 4.25623608 4.74359894 
            5.23135233 5.71946001 6.20788622 6.69659519 7.18555069 7.674716 8.16405487 
            8.65353107 9.14310837 9.63274956 10.1224174 10.6120768 11.1016903 11.5912218 
            12.0806341 12.569891 13.0589561 13.5477924 14.0363646 14.5246363 15.0125713 
            15.5001335 15.9872875 16.473999 16.9602299 17.4459476 17.9311161 18.4157009 
            18.8996677 19.3829842 19.865612 20.3475227 20.8286781 21.3090496 21.7886047 
            22.2673073 22.7451267 23.2220345 23.6979961 24.1729832 24.646965 25.1199093 
            25.5917892 26.0625744 26.5322361 27.0007477 27.4680786 27.934206 28.3990974 
            28.8627319 29.3250809 29.7861176 30.245821 30.7041626 31.1611214 31.6166725 
            32.070797 32.5234642 32.974659 33.4243584 33.8725433 34.319191 34.7642822 
            35.207798 -17.3382301 -16.8999348 -16.459959 -16.0183163 -15.5750275 
            -15.1301098 -14.6835814 -14.2354603 -13.7857685 -13.3345251 -12.8817511 
            -12.4274664 -11.9716949 -11.5144587 -11.0557795 -10.5956812 -10.1341877 
            -9.67132378 -9.20711422 -8.74158382 -8.27475929 -7.8066678 -7.33733463 
            -6.86678839 -6.39505672 -5.92216778 -5.44815063 -4.97303486 -4.49684954 
            -4.01962519 -3.54139209 -3.06218195 -2.58202577 -2.10095549 -1.61900318 
            -1.1362015 -0.65258348 -0.168182358 0.316968232 0.802834272 1.28938162 
            1.77657557 2.26438141 2.75276375 3.24168754 3.73111701 4.22101641 4.71134949 
            5.20207977 5.69317198 6.18458796 6.67629194 7.16824722 7.66041613 8.15276241 
            8.64524746 9.13783646 9.63048935 10.1231709 10.6158428 11.108469 11.6010103 
            12.0934305 12.5856924 13.0777597 13.5695934 14.0611582 14.5524168 15.0433331 
            15.5338688 16.0239906 16.5136585 17.00284 17.491497 17.9795952 18.4671001 
            18.9539757 19.4401855 19.9256992 20.4104786 20.8944931 21.3777065 21.8600883 
            22.3416023 22.8222198 23.3019066 23.780632 24.2583656 24.7350731 25.2107277 
            25.6852989 26.1587543 26.6310692 27.102211 27.572155 28.0408707 28.5083313 
            28.9745121 29.4393845 29.9029255 30.3651066 30.8259068 31.2852974 31.7432594 
            32.1997643 32.6547966 33.1083298 33.5603409 34.0108109 34.4597168 34.9070473 
            35.3527718 -17.4945278 -17.0541229 -16.612009 -16.1682053 -15.7227268 
            -15.2755928 -14.8268213 -14.3764324 -13.9244461 -13.4708824 -13.0157633 
            -12.5591087 -12.1009417 -11.6412849 -11.1801605 -10.7175941 -10.2536087 
            -9.78822899 -9.3214798 -8.85338783 -8.3839798 -7.91328144 -7.4413209 
            -6.96812534 -6.49372339 -6.01814413 -5.54141665 -5.06357098 -4.58463669 
            -4.10464478 -3.62362623 -3.14161277 -2.65863633 -2.17472935 -1.68992424 
            -1.20425451 -0.71775347 -0.230455056 0.257606506 0.746396661 1.23588061 
            1.72602308 2.21678853 2.70814133 3.20004559 3.69246483 4.18536234 4.67870235 
            5.17244673 5.66655922 6.16100216 6.65573835 7.15073013 7.64593983 8.14132977 
            8.6368618 9.13249874 9.62820148 10.1239338 10.6196556 11.1153307 11.61092 
            12.1063852 12.6016903 13.0967951 13.5916643 14.0862589 14.5805407 15.0744743 
            15.5680208 16.0611439 16.5538063 17.0459728 17.5376053 18.0286694 18.5191288 
            19.0089455 19.4980869 19.986517 20.4742012 20.9611053 21.4471951 21.932436 
            22.4167976 22.9002438 23.3827419 23.8642616 24.3447704 24.8242378 25.3026314 
            25.7799225 26.2560787 26.7310734 27.2048759 27.6774578 28.1487904 28.6188469 
            29.0876007 29.5550232 30.0210915 30.4857769 30.9490566 31.4109039 31.8712978 
            32.3302116 32.7876282 33.243515 33.6978607 34.1506386 34.6018295 35.0514107 
            35.4993668 -17.6525497 -17.2100201 -16.7657528 -16.319767 -15.8720808 
            -15.4227123 -14.9716787 -14.519002 -14.0647011 -13.6087971 -13.15131 
            -12.6922636 -12.231678 -11.769578 -11.3059864 -10.8409262 -10.374423 
            -9.90650272 -9.4371891 -8.96650887 -8.49448967 -8.02115822 -7.54654169 
            -7.0706687 -6.59356785 -6.11526918 -5.63580132 -5.15519524 -4.67348099 
            -4.19069052 -3.70685506 -3.22200656 -2.73617768 -2.24940109 -1.76171017 
            -1.27313876 -0.783720851 -0.293490976 0.197516143 0.689265311 1.18172097 
            1.67484736 2.16860843 2.66296768 3.15788841 3.6533339 4.14926672 4.64564991 
            5.14244556 5.63961601 6.13712263 6.6349287 7.13299465 7.63128281 8.12975502 
            8.62837124 9.12709427 9.62588596 10.1247053 10.6235161 11.1222782 11.6209526 
            12.1195021 12.6178865 13.1160688 13.6140089 14.1116705 14.6090136 15.1060019 
            15.6025953 16.0987587 16.5944519 17.0896397 17.5842838 18.0783501 18.5717983 
            19.0645924 19.5566998 20.0480824 20.5387058 21.0285339 21.5175323 22.0056686 
            22.4929066 22.9792118 23.4645557 23.9489021 24.4322186 24.9144745 25.3956394 
            25.875679 26.3545666 26.8322697 27.3087597 27.784008 28.2579861 28.7306652 
            29.2020187 29.6720181 30.1406384 30.6078529 31.0736389 31.5379677 32.0008163 
            32.462162 32.9219818 33.380249 33.8369484 34.2920532 34.7455444 35.197403 
            35.6476059 -17.8123264 -17.3676529 -16.9212151 -16.473032 -16.023119 
            -15.5714951 -15.1181812 -14.6631956 -14.2065592 -13.7482929 -13.2884178 
            -12.8269558 -12.3639297 -11.8993626 -11.433279 -10.9657021 -10.4966564 
            -10.0261688 -9.55426502 -9.08096981 -8.60631275 -8.1303196 -7.65301847 
            -7.17443943 -6.69461107 -6.21356249 -5.7313242 -5.24792719 -4.76340246 
            -4.27778196 -3.79109716 -3.30338097 -2.81466651 -2.32498717 -1.83437669 
            -1.34286964 -0.850500345 -0.357304126 0.136683688 0.631427288 1.12689054 
            1.6230371 2.11983013 2.61723232 3.11520672 3.61371565 4.11272097 4.61218548 
            5.11206961 5.61233568 6.11294508 6.6138587 7.11503744 7.61644268 8.11803436 
            8.61977482 9.12162304 9.62353992 10.1254873 10.6274242 11.1293125 11.6311111 
            12.132782 12.6342859 13.1355829 13.6366339 14.1373997 14.6378431 15.1379223 
            15.6376019 16.1368408 16.635603 17.1338501 17.6315422 18.1286449 18.6251202 
            19.1209278 19.6160374 20.1104069 20.6040039 21.0967903 21.5887337 22.0797958 
            22.5699463 23.0591469 23.5473652 24.0345707 24.5207272 25.0058041 25.489769 
            25.9725895 26.454237 26.934679 27.413887 27.8918304 28.3684807 28.8438091 
            29.3177891 29.7903919 30.261591 30.7313614 31.1996746 31.6665096 32.1318359 
            32.5956383 33.0578842 33.5185547 33.9776268 34.4350815 34.8908958 35.345047 
            35.7975197 -17.9738846 -17.52705 -17.0784245 -16.6280231 -16.1758652 
            -15.7219696 -15.2663546 -14.8090401 -14.3500481 -13.8893976 -13.4271116 
            -12.963213 -12.4977226 -12.0306654 -11.5620651 -11.0919456 -10.6203327 
            -10.1472521 -9.67273045 -9.19679356 -8.71947002 -8.24078751 -7.76077461 
            -7.27945995 -6.79687357 -6.3130455 -5.82800627 -5.34178734 -4.85442019 
            -4.36593723 -3.87637067 -3.38575387 -2.89412045 -2.40150428 -1.90794015 
            -1.41346252 -0.918106914 -0.421908915 0.0750953779 0.572869599 1.07137692 
            1.57058024 2.0704422 2.570925 3.07199049 3.57360077 4.07571697 4.57830048 
            5.0813117 5.58471251 6.08846283 6.5925231 7.09685373 7.60141516 8.10616684 
            8.61106968 9.11608219 9.62116528 10.1262789 10.631382 11.1364355 11.6413984 
            12.1462307 12.6508923 13.1553431 13.659543 14.1634541 14.6670341 15.1702452 
            15.6730471 16.1754017 16.6772709 17.1786137 17.6793919 18.1795692 18.6791058 
            19.1779652 19.6761112 20.1735058 20.6701107 21.1658916 21.6608124 22.1548386 
            22.647934 23.1400623 23.6311913 24.1212864 24.6103153 25.0982456 25.585043 
            26.0706749 26.5551128 27.0383244 27.5202789 28.000946 28.4802971 28.9583035 
            29.4349365 29.9101696 30.3839741 30.8563232 31.3271942 31.7965565 32.264389 
            32.7306633 33.1953621 33.6584587 34.1199303 34.5797539 35.0379105 35.4943771 
            35.9491348 -18.1372509 -17.6882401 -17.2374096 -16.7847729 -16.3303509 
            -15.8741627 -15.4162273 -14.9565639 -14.4951944 -14.0321388 -13.56742 
            -13.1010599 -12.6330824 -12.1635113 -11.6923695 -11.2196827 -10.7454767 
            -10.2697773 -9.79261112 -9.3140049 -8.83398819 -8.35258675 -7.86983204 
            -7.38575268 -6.90037823 -6.41373968 -5.92586851 -5.43679571 -4.94655371 
            -4.45517588 -3.96269441 -3.46914339 -2.97455716 -2.47896981 -1.98241687 
            -1.48493361 -0.986555934 -0.487320095 0.0127371205 0.513578713 1.01516712 
            1.51746476 2.02043343 2.52403474 3.02822971 3.53297973 4.0382452 4.5439868 
            5.05016518 5.55673981 6.06367064 6.57091713 7.07843971 7.5861969 8.09414864 
            8.60225391 9.11047077 9.61876011 10.1270809 10.6353903 11.1436491 11.6518154 
            12.1598492 12.6677084 13.1753531 13.6827431 14.1898375 14.6965942 15.2029762 
            15.7089405 16.2144489 16.7194614 17.2239399 17.7278423 18.2311325 18.7337704 
            19.2357178 19.7369385 20.2373924 20.7370434 21.2358551 21.7337894 22.2308121 
            22.7268867 23.2219772 23.7160511 24.2090702 24.701004 25.1918182 25.6814804 
            26.1699562 26.6572151 27.1432247 27.6279564 28.1113777 28.5934582 29.0741711 
            29.5534859 30.0313759 30.5078125 30.9827671 31.4562168 31.9281349 32.3984947 
            32.8672714 33.3344421 33.7999878 34.2638741 34.7260895 35.1866112 35.6454124 
            36.102478 -18.3024578 -17.8512535 -17.3981972 -16.9433079 -16.4866047 
            -16.0281029 -15.5678272 -15.105794 -14.6420259 -14.1765432 -13.7093687 
            -13.2405262 -12.7700367 -12.2979269 -11.8242188 -11.3489399 -10.8721142 
            -10.3937683 -9.91393089 -9.43262768 -8.94988823 -8.46574116 -7.9802146 
            -7.49334002 -7.00514698 -6.51566696 -6.02493143 -5.53297329 -5.03982401 
            -4.54551792 -4.05008793 -3.5535686 -3.05599451 -2.55740118 -2.05782413 
            -1.55729914 -1.05586302 -0.553552747 -0.0504055433 0.453540832 0.958248258 
            1.46367824 1.96979201 2.47655034 2.9839139 3.49184299 4.00029755 4.50923729 
            5.01862192 5.52841043 6.0385623 6.54903603 7.05979061 7.57078457 8.08197689 
            8.59332561 9.10478878 9.61632442 10.1278925 10.6394501 11.1509552 11.6623659 
            12.1736412 12.6847401 13.1956196 13.7062387 14.2165565 14.726532 15.2361231 
            15.7452908 16.2539921 16.7621899 17.2698402 17.776907 18.2833481 18.7891254 
            19.294199 19.7985306 20.3020821 20.8048153 21.3066921 21.8076782 22.3077335 
            22.8068237 23.3049107 23.8019619 24.2979412 24.7928143 25.2865448 25.7791023 
            26.2704544 26.7605667 27.2494068 27.7369442 28.2231483 28.7079887 29.1914368 
            29.67346 30.1540356 30.6331291 31.1107178 31.5867748 32.0612717 32.5341835 
            33.0054855 33.4751549 33.9431648 34.4094963 34.8741264 35.3370285 35.7981873 
            36.257576 -18.469532 -18.0161152 -17.5608196 -17.1036587 -16.6446533 
            -16.1838207 -15.7211838 -15.2567596 -14.7905712 -14.3226395 -13.8529873 
            -13.3816376 -12.9086132 -12.4339399 -11.9576406 -11.4797421 -11.0002708 
            -10.5192528 -10.0367155 -9.55268764 -9.06719685 -8.58027267 -8.09194565 
            -7.60224533 -7.11120272 -6.61884975 -6.12521839 -5.63034105 -5.13425159 
            -4.63698339 -4.13857079 -3.63904834 -3.13845158 -2.6368165 -2.13417888 
            -1.6305759 -1.12604451 -0.620622396 -0.114347428 0.392741859 0.900606692 
            1.40920782 1.91850591 2.42846084 2.93903279 3.45018077 3.96186471 4.47404289 
            4.98667431 5.49971819 6.01313162 6.52687359 7.04090166 7.55517435 8.06964874 
            8.58428192 9.0990324 9.61385822 10.1287146 10.6435614 11.1583548 11.6730518 
            12.1876116 12.7019901 13.2161455 13.7300358 14.243619 14.7568521 15.2696953 
            15.7821054 16.2940426 16.8054619 17.316328 17.8265953 18.3362274 18.8451824 
            19.3534203 19.8609028 20.36759 20.8734417 21.3784237 21.8824959 22.3856201 
            22.8877621 23.3888817 23.8889465 24.3879185 24.8857632 25.3824463 25.8779335 
            26.3721924 26.8651886 27.3568897 27.8472652 28.3362827 28.8239117 29.3101234 
            29.7948856 30.2781734 30.7599545 31.240202 31.7188892 32.1959915 32.6714821 
            33.1453323 33.6175232 34.088028 34.5568199 35.0238838 35.489193 35.9527283 
            36.414463 -18.638504 -18.1828613 -17.7253056 -17.2658539 -16.8045273 
            -16.3413448 -15.8763256 -15.4094896 -14.9408598 -14.4704571 -13.9983034 
            -13.5244226 -13.0488396 -12.5715771 -12.0926619 -11.6121187 -11.1299744 
            -10.6462564 -10.1609926 -9.67421055 -9.18593884 -8.69620895 -8.20504951 
            -7.71249294 -7.21856928 -6.72331095 -6.22675085 -5.72892189 -5.22985792 
            -4.72959328 -4.22816324 -3.72560239 -3.22194719 -2.71723413 -2.21149945 
            -1.70478117 -1.19711685 -0.68854481 -0.179103717 0.331167281 0.842228711 
            1.35404062 1.86656272 2.37975454 2.89357495 3.40798306 3.92293692 4.43839502 
            4.95431519 5.47065544 5.98737288 6.50442505 7.02176905 7.53936195 8.05716038 
            8.57512188 9.09320259 9.61135864 10.1295481 10.6477261 11.1658497 11.683876 
            12.2017622 12.7194633 13.2369366 13.7541399 14.2710304 14.7875643 15.3036995 
            15.8193941 16.3346062 16.8492908 17.3634109 17.8769226 18.3897839 18.9019566 
            19.4133987 19.9240704 20.4339314 20.9429417 21.4510651 21.9582615 22.4644928 
            22.9697208 23.4739094 23.9770222 24.4790211 24.9798737 25.4795418 25.977993 
            26.4751911 26.9711056 27.4657001 27.9589443 28.4508057 28.9412537 29.4302597 
            29.9177895 30.4038162 30.8883114 31.3712444 31.8525925 32.332325 32.8104172 
            33.2868423 33.7615776 34.2345963 34.7058792 35.1753998 35.6431351 36.1090622 
            36.5731659 -18.8094082 -18.3515186 -17.8916855 -17.4299259 -16.966259 
            -16.5007057 -16.0332832 -15.5640154 -15.0929213 -14.6200237 -14.1453466 
            -13.6689119 -13.1907444 -12.7108688 -12.229311 -11.7460966 -11.2612524 
            -10.774806 -10.2867861 -9.79722118 -9.3061409 -8.81357384 -8.31955242 
            -7.82410717 -7.32727003 -6.82907391 -6.32955217 -5.82873726 -5.32666492 
            -4.8233695 -4.31888628 -3.81325126 -3.30650115 -2.79867291 -2.28980398 
            -1.7799325 -1.26909697 -0.757336378 -0.244689986 0.268802255 0.783100188 
            1.29816306 1.81394994 2.33041954 2.84752989 3.36523914 3.88350511 4.4022851 
            4.92153645 5.44121552 5.96127939 6.48168468 7.00238752 7.52334404 8.04450989 
            8.56584263 9.08729649 9.60882759 10.1303921 10.6519451 11.1734428 11.6948414 
            12.2160969 12.7371635 13.2579985 13.7785578 14.2987976 14.818675 15.3381453 
            15.8571663 16.3756943 16.8936882 17.4111023 17.9278984 18.4440308 18.9594612 
            19.4741478 19.9880466 20.5011215 21.0133305 21.5246334 22.0349903 22.5443668 
            23.0527191 23.5600128 24.0662098 24.5712738 25.0751686 25.5778561 26.0793037 
            26.5794773 27.0783405 27.575861 28.0720062 28.5667439 29.0600414 29.5518684 
            30.0421944 30.5309906 31.0182285 31.5038757 31.9879093 32.4702988 32.9510193 
            33.4300423 33.9073486 34.3829079 34.8566971 35.3286934 35.7988777 36.2672272 
            36.7337189 -18.9822731 -18.5221195 -18.0599918 -17.5959053 -17.129879 
            -16.6619339 -16.1920891 -15.7203665 -15.2467861 -14.7713718 -14.2941465 
            -13.815134 -13.3343573 -12.8518429 -12.3676167 -11.8817034 -11.3941326 
            -10.9049301 -10.4141264 -9.92174816 -9.42782784 -8.93239403 -8.43547821 
            -7.93711329 -7.43733072 -6.93616343 -6.43364573 -5.92981148 -5.42469549 
            -4.91833305 -4.41076088 -3.90201521 -3.39213324 -2.88115239 -2.36911106 
            -1.85604799 -1.34200239 -0.827013671 -0.311122209 0.205631539 0.72320652 
            1.24156141 1.76065445 2.28044343 2.80088568 3.32193875 3.84355927 4.36570406 
            4.88832903 5.41139078 5.93484449 6.4586463 6.98275185 7.50711584 8.03169441 
            8.55644131 9.08131218 9.60626221 10.1312466 10.6562195 11.1811361 11.7059507 
            12.2306185 12.7550955 13.279336 13.8032951 14.3269291 14.8501921 15.3730412 
            15.8954315 16.4173183 16.9386616 17.4594135 17.9795361 18.4989815 19.0177116 
            19.5356808 20.0528507 20.5691776 21.0846233 21.5991459 22.1127052 22.6252613 
            23.1367779 23.6472149 24.1565323 24.6646957 25.1716671 25.677412 26.1818905 
            26.6850719 27.1869183 27.687397 28.1864758 28.6841202 29.1802979 29.6749783 
            30.1681328 30.6597271 31.1497326 31.6381245 32.1248703 32.6099434 33.0933151 
            33.5749626 34.054863 34.5329857 35.0093079 35.4838066 35.9564629 36.4272461 
            36.8961449 
yvals     = 42.6348152 42.6832542 42.7308884 42.7777176 42.8237343 42.8689423 42.9133339 
            42.956913 42.9996719 43.0416107 43.0827332 43.1230278 43.1625023 43.201149 
            43.2389641 43.2759514 43.3121109 43.3474312 43.3819199 43.4155731 43.4483871 
            43.4803619 43.5114937 43.5417862 43.5712318 43.5998383 43.627594 43.6545029 
            43.6805611 43.7057724 43.7301331 43.7536392 43.7762947 43.7980919 43.8190384 
            43.8391228 43.8583565 43.8767281 43.8942413 43.9108925 43.9266891 43.9416199 
            43.9556885 43.968895 43.9812393 43.9927216 44.0033379 44.0130882 44.0219727 
            44.029995 44.0371475 44.0434341 44.0488548 44.0534096 44.0570984 44.0599174 
            44.0618668 44.0629539 44.0631714 44.0625191 44.0610008 44.0586166 44.0553627 
            44.0512428 44.0462532 44.0403976 44.03368 44.0260925 44.0176392 44.0083199 
            43.9981384 43.9870872 43.9751778 43.9624023 43.948761 43.9342613 43.9188995 
            43.9026756 43.8855896 43.8676491 43.8488464 43.8291893 43.80867 43.7873001 
            43.7650719 43.741993 43.7180595 43.6932755 43.6676369 43.6411552 43.6138191 
            43.58564 43.5566139 43.5267448 43.4960327 43.4644775 43.4320831 43.3988495 
            43.3647804 43.3298759 43.294136 43.2575645 43.2201614 43.1819267 43.142868 
            43.1029854 43.0622749 43.0207443 42.9783936 42.9352226 42.8912392 42.8464394 
            42.8526115 42.9012375 42.9490585 42.9960709 43.0422668 43.0876503 43.1322174 
            43.1759682 43.218895 43.2610016 43.3022804 43.3427391 43.3823662 43.4211617 
            43.4591293 43.4962654 43.5325623 43.5680237 43.6026497 43.6364326 43.6693764 
            43.7014809 43.7327347 43.7631493 43.7927132 43.8214302 43.8492966 43.8763123 
            43.9024734 43.927784 43.95224 43.9758415 43.9985847 44.0204735 44.0415001 
            44.0616684 44.0809746 44.0994186 44.1170044 44.1337242 44.1495781 44.1645699 
            44.1786957 44.1919556 44.2043495 44.2158775 44.2265358 44.2363243 44.2452469 
            44.2532997 44.2604828 44.2667923 44.2722359 44.2768097 44.2805099 44.2833405 
            44.2853012 44.2863884 44.2866058 44.2859535 44.2844315 44.2820358 44.2787666 
            44.2746315 44.2696228 44.2637444 44.257 44.249382 44.2408943 44.2315369 
            44.2213135 44.2102203 44.1982613 44.1854362 44.1717415 44.1571846 44.1417618 
            44.125473 44.1083183 44.0903053 44.0714302 44.051693 44.0310936 44.0096359 
            43.9873199 43.9641495 43.9401207 43.9152374 43.8894997 43.8629112 43.8354683 
            43.8071747 43.7780342 43.7480469 43.7172127 43.6855354 43.6530113 43.619648 
            43.5854416 43.5503998 43.5145187 43.4778023 43.4402504 43.4018669 43.3626556 
            43.3226128 43.2817459 43.2400513 43.1975327 43.1541939 43.1100349 43.0650597 
            43.0704041 43.1192245 43.1672287 43.2144241 43.2608032 43.3063622 43.3511047 
            43.3950272 43.4381218 43.4803925 43.5218353 43.5624504 43.6022339 43.6411858 
            43.6793022 43.7165833 43.7530251 43.7886276 43.8233871 43.8573074 43.8903809 
            43.9226074 43.9539909 43.9845238 44.0142021 44.0430336 44.0710106 44.0981331 
            44.1244011 44.1498146 44.174366 44.1980629 44.2208977 44.2428703 44.2639809 
            44.2842293 44.3036118 44.3221321 44.3397865 44.3565712 44.3724899 44.3875427 
            44.4017258 44.4150391 44.4274826 44.4390526 44.4497528 44.4595833 44.4685402 
            44.4766235 44.4838371 44.4901733 44.495636 44.5002289 44.5039444 44.5067863 
            44.5087547 44.5098495 44.510067 44.5094109 44.5078812 44.5054741 44.5021973 
            44.4980431 44.4930153 44.487114 44.4803391 44.4726906 44.4641685 44.4547768 
            44.4445114 44.4333763 44.4213676 44.4084892 44.3947411 44.380127 44.3646393 
            44.3482857 44.3310661 44.3129807 44.2940292 44.2742119 44.2535324 44.2319908 
            44.2095871 44.1863213 44.1621971 44.1372147 44.1113739 44.0846786 44.0571289 
            44.0287247 43.9994698 43.9693604 43.9384041 43.906601 43.873951 43.8404541 
            43.8061142 43.7709312 43.7349091 43.6980476 43.660347 43.6218147 43.5824471 
            43.5422478 43.5012169 43.459362 43.4166756 43.3731689 43.3288383 43.2836838 
            43.2881927 43.337204 43.3853989 43.4327774 43.4793358 43.525074 43.5699921 
            43.6140862 43.6573486 43.6997871 43.741394 43.7821693 43.8221092 43.8612137 
            43.8994789 43.9369087 43.9734917 44.0092354 44.044136 44.078186 44.111393 
            44.1437492 44.175251 44.2059059 44.2357063 44.2646484 44.2927399 44.3199692 
            44.3463402 44.3718529 44.3965034 44.4202919 44.4432182 44.4652786 44.4864731 
            44.5068016 44.5262642 44.544857 44.5625801 44.5794334 44.595417 44.6105309 
            44.6247673 44.638134 44.6506271 44.6622467 44.6729889 44.6828575 44.6918488 
            44.6999664 44.7072067 44.7135696 44.7190552 44.7236671 44.7273979 44.7302513 
            44.7322273 44.7333221 44.7335434 44.7328835 44.7313461 44.7289352 44.7256393 
            44.7214699 44.716423 44.7104988 44.7036972 44.6960182 44.6874619 44.6780319 
            44.6677284 44.6565475 44.6444893 44.6315613 44.6177597 44.6030846 44.5875359 
            44.5711174 44.5538292 44.5356712 44.5166435 44.4967461 44.4759865 44.4543571 
            44.4318657 44.4085083 44.384285 44.3592033 44.3332634 44.3064613 44.278801 
            44.2502861 44.2209129 44.1906853 44.1596069 44.1276741 44.0948944 44.0612679 
            44.0267906 43.9914703 43.955307 43.9182968 43.8804512 43.8417664 43.8022423 
            43.7618866 43.7206955 43.6786728 43.6358223 43.5921402 43.5476379 43.5023079 
            43.5059738 43.5551758 43.6035576 43.651123 43.6978645 43.743782 43.7888756 
            43.8331413 43.8765755 43.9191818 43.9609489 44.0018845 44.0419807 44.0812416 
            44.1196594 44.1572342 44.1939621 44.229847 44.2648849 44.2990723 44.3324089 
            44.3648911 44.3965225 44.4272957 44.4572144 44.4862709 44.514473 44.5418129 
            44.5682869 44.5939026 44.6186523 44.6425362 44.6655502 44.6876984 44.7089806 
            44.7293892 44.7489281 44.7675934 44.7853889 44.8023109 44.8183556 44.8335304 
            44.8478241 44.8612442 44.8737869 44.8854523 44.8962364 44.906147 44.9151764 
            44.9233246 44.9305916 44.9369812 44.9424896 44.9471169 44.9508629 44.9537277 
            44.9557114 44.9568138 44.9570351 44.9563713 44.9548302 44.9524078 44.9491005 
            44.944912 44.939846 44.9338989 44.9270668 44.9193611 44.9107704 44.9013023 
            44.8909531 44.8797302 44.8676262 44.8546448 44.840786 44.8260536 44.8104439 
            44.7939606 44.7765999 44.7583694 44.7392693 44.7192917 44.6984482 44.6767349 
            44.6541519 44.6306992 44.6063843 44.5812035 44.5551567 44.5282478 44.5004807 
            44.4718513 44.4423599 44.412014 44.3808136 44.3487549 44.3158455 44.2820854 
            44.2474709 44.2120094 44.175705 44.1385498 44.1005554 44.061718 44.0220375 
            43.9815216 43.9401703 43.8979836 43.8549614 43.8111115 43.7664337 43.7209282 
            43.7237473 43.7731361 43.8217087 43.8694572 43.9163857 43.9624825 44.0077515 
            44.0521889 44.0957947 44.1385689 44.1805 44.2215958 44.2618523 44.3012657 
            44.3398361 44.3775558 44.4144325 44.4504585 44.4856339 44.5199547 44.5534248 
            44.5860367 44.6177902 44.6486893 44.6787224 44.7078972 44.7362099 44.7636566 
            44.7902412 44.8159561 44.8408012 44.8647804 44.8878899 44.9101257 44.9314919 
            44.9519806 44.9715996 44.9903412 45.0082054 45.0251961 45.0413055 45.0565376 
            45.0708923 45.084362 45.0969543 45.1086693 45.1194954 45.1294441 45.1385078 
            45.1466904 45.1539879 45.1604042 45.1659355 45.170578 45.1743393 45.1772156 
            45.1792107 45.1803169 45.1805382 45.1798744 45.1783218 45.1758881 45.1725693 
            45.1683693 45.1632805 45.1573067 45.1504517 45.1427116 45.1340866 45.1245804 
            45.114193 45.1029205 45.0907707 45.0777359 45.0638237 45.0490303 45.0333595 
            45.0168114 44.999382 44.9810791 44.9618988 44.9418449 44.9209175 44.8991165 
            44.8764458 44.8529015 44.8284874 44.8032074 44.7770576 44.750042 44.7221642 
            44.6934204 44.6638145 44.6333466 44.6020203 44.5698357 44.5367966 44.502903 
            44.4681511 44.4325523 44.3961029 44.3588028 44.3206558 44.2816658 44.2418289 
            44.2011528 44.1596413 44.1172867 44.0740967 44.0300751 43.9852219 43.939537 
            43.9415016 43.9910851 44.0398483 44.0877838 44.1348915 44.1811714 44.2266159 
            44.2712288 44.3150063 44.3579445 44.4000435 44.4413033 44.4817162 44.521286 
            44.5600052 44.5978775 44.6348991 44.6710663 44.7063789 44.7408371 44.774437 
            44.8071785 44.8390617 44.870079 44.9002342 44.9295235 44.9579506 44.9855042 
            45.0121918 45.0380096 45.0629578 45.0870323 45.1102295 45.1325569 45.154007 
            45.1745796 45.1942749 45.213089 45.2310257 45.248085 45.2642593 45.2795525 
            45.2939606 45.3074875 45.3201332 45.3318901 45.342762 45.3527489 45.3618507 
            45.3700676 45.3773918 45.3838348 45.3893852 45.3940506 45.3978271 45.4007149 
            45.4027138 45.4038239 45.4040451 45.4033813 45.401825 45.3993797 45.3960495 
            45.3918304 45.3867188 45.3807259 45.3738403 45.3660698 45.3574104 45.3478661 
            45.3374367 45.3261223 45.3139191 45.3008347 45.2868652 45.2720146 45.2562828 
            45.239666 45.222168 45.2037926 45.184536 45.164402 45.1433907 45.1215019 
            45.0987396 45.0751038 45.0505943 45.0252113 44.9989586 44.9718361 44.9438438 
            44.9149895 44.8852654 44.8546791 44.8232269 44.7909164 44.7577438 44.7237167 
            44.6888275 44.6530876 44.6164932 44.5790482 44.5407524 44.501606 44.4616165 
            44.4207802 44.3791008 44.3365822 44.2932243 44.2490273 44.2039986 44.1581345 
            44.1592369 44.2090149 44.2579689 44.3060913 44.3533821 44.3998451 44.4454689 
            44.4902573 44.5342064 44.5773125 44.6195755 44.6609955 44.7015686 44.7412949 
            44.7801666 44.8181877 44.8553543 44.8916664 44.9271202 44.9617119 44.9954453 
            45.0283165 45.0603256 45.091465 45.1217422 45.1511459 45.1796837 45.2073517 
            45.2341461 45.2600632 45.2851105 45.3092804 45.3325729 45.3549881 45.3765221 
            45.3971748 45.4169502 45.4358406 45.4538498 45.470974 45.4872131 45.5025673 
            45.5170364 45.5306168 45.5433121 45.5551147 45.5660324 45.5760574 45.5851974 
            45.5934448 45.6007996 45.6072655 45.6128426 45.6175232 45.621315 45.6242142 
            45.6262207 45.6273384 45.6275597 45.6268921 45.6253319 45.6228752 45.6195297 
            45.6152954 45.6101646 45.6041451 45.5972328 45.5894318 45.5807381 45.5711555 
            45.5606842 45.549324 45.537075 45.5239372 45.5099144 45.4950027 45.4792061 
            45.4625206 45.4449577 45.426506 45.4071732 45.3869591 45.3658638 45.3438911 
            45.3210373 45.2973061 45.2726974 45.2472153 45.2208557 45.1936264 45.1655235 
            45.1365547 45.1067123 45.076004 45.0444298 45.0119896 44.9786873 44.9445229 
            44.9095001 44.8736153 44.8368759 44.7992821 44.7608376 44.7215385 44.6813889 
            44.6403923 44.5985489 44.5558624 44.5123367 44.467968 44.42276 44.3767166 
            44.3769531 44.4269257 44.4760666 44.5243797 44.5718575 44.6184998 44.6643028 
            44.7092667 44.7533875 44.7966614 44.8390923 44.8806763 44.9214096 44.9612885 
            45.0003166 45.0384865 45.075798 45.1122551 45.1478462 45.182579 45.2164459 
            45.2494469 45.2815819 45.3128471 45.3432388 45.3727646 45.401413 45.4291916 
            45.456089 45.4821129 45.5072594 45.5315247 45.5549088 45.5774117 45.5990334 
            45.6197701 45.6396217 45.6585884 45.6766701 45.6938629 45.7101669 45.7255821 
            45.7401085 45.753746 45.7664871 45.7783394 45.7893028 45.7993698 45.8085442 
            45.8168221 45.8242073 45.8306999 45.8362961 45.8409996 45.8448067 45.8477173 
            45.8497314 45.850853 45.8510742 45.8504028 45.848835 45.8463745 45.8430138 
            45.8387604 45.8336105 45.8275681 45.8206291 45.8127937 45.8040657 45.794445 
            45.7839317 45.7725258 45.7602272 45.7470398 45.7329559 45.7179871 45.7021255 
            45.685379 45.6677399 45.6492195 45.6298065 45.6095123 45.5883331 45.5662727 
            45.5433273 45.5195007 45.4947968 45.4692116 45.442749 45.4154129 45.3871994 
            45.3581123 45.3281517 45.2973213 45.2656212 45.2330551 45.1996193 45.1653214 
            45.1301575 45.0941353 45.057251 45.0195084 44.9809074 44.9414558 44.9011497 
            44.8599892 44.8179855 44.7751312 44.7314301 44.6868896 44.6415062 44.5952835 
            44.5946426 44.6448097 44.6941452 44.7426453 44.7903061 44.8371315 44.8831139 
            44.9282532 44.9725456 45.015995 45.0585899 45.100338 45.1412315 45.1812668 
            45.2204475 45.25877 45.2962303 45.3328285 45.3685608 45.4034309 45.4374313 
            45.470562 45.5028229 45.534214 45.5647278 45.594368 45.6231346 45.6510201 
            45.6780281 45.704155 45.7294006 45.7537613 45.7772408 45.7998314 45.8215408 
            45.8423576 45.8622894 45.8813324 45.8994865 45.916748 45.9331169 45.9485931 
            45.9631767 45.9768677 45.9896622 46.001564 46.0125656 46.0226746 46.0318832 
            46.0401993 46.0476151 46.0541306 46.0597496 46.0644722 46.0682945 46.0712166 
            46.0732384 46.0743637 46.0745888 46.0739136 46.0723419 46.0698662 46.066494 
            46.0622253 46.0570526 46.0509834 46.0440178 46.0361519 46.0273933 46.0177307 
            46.0071754 45.9957237 45.9833755 45.9701347 45.9559975 45.9409676 45.925045 
            45.9082298 45.890522 45.8719254 45.8524361 45.8320618 45.8107986 45.7886467 
            45.7656097 45.7416916 45.7168846 45.6912003 45.6646347 45.637188 45.60886 
            45.5796585 45.5495796 45.5186272 45.4868011 45.4541054 45.4205399 45.3861046 
            45.3508034 45.3146362 45.277607 45.2397156 45.2009659 45.1613541 45.1208916 
            45.0795708 45.0373993 44.9943771 44.9505043 44.9057884 44.8602257 44.8138237 
            44.8123016 44.8626633 44.9121933 44.9608803 45.0087318 45.0557365 45.101902 
            45.1472168 45.1916847 45.235302 45.2780685 45.3199768 45.3610306 45.401226 
            45.4405594 45.4790344 45.5166397 45.5533829 45.5892601 45.6242638 45.6584015 
            45.6916656 45.7240524 45.7555656 45.7862015 45.8159599 45.844841 45.8728371 
            45.8999519 45.9261818 45.9515266 45.9759865 45.9995575 46.0222435 46.0440369 
            46.0649376 46.0849495 46.1040688 46.1222916 46.1396217 46.1560593 46.1715965 
            46.1862373 46.1999817 46.2128296 46.2247772 46.2358246 46.2459717 46.2552223 
            46.2635689 46.2710114 46.2775574 46.2831993 46.2879372 46.2917747 46.2947083 
            46.2967415 46.2978706 46.2980957 46.2974167 46.2958374 46.293354 46.2899704 
            46.2856827 46.2804909 46.2743988 46.2674026 46.2595062 46.2507095 46.2410126 
            46.2304115 46.218914 46.2065201 46.193222 46.1790314 46.1639404 46.147953 
            46.1310692 46.1132927 46.0946198 46.0750542 46.0545998 46.0332489 46.011013 
            45.9878845 45.9638672 45.9389648 45.9131775 45.8865051 45.8589478 45.8305092 
            45.8011932 45.7709961 45.7399178 45.7079659 45.6751404 45.6414413 45.6068726 
            45.5714302 45.5351219 45.4979439 45.4599037 45.4210014 45.381237 45.3406105 
            45.2991295 45.2567902 45.2136002 45.1695557 45.1246643 45.0789261 45.032341 
            45.0299301 45.0804863 45.1302071 45.1790886 45.2271233 45.2743149 45.3206596 
            45.3661537 45.4107971 45.4545822 45.4975166 45.5395927 45.5808067 45.6211586 
            45.6606483 45.6992722 45.73703 45.7739182 45.8099365 45.8450813 45.8793526 
            45.9127464 45.9452629 45.976902 46.0076599 46.0375366 46.0665283 46.0946388 
            46.1218605 46.1481934 46.1736412 46.1981964 46.2218628 46.2446365 46.2665176 
            46.2875023 46.3075943 46.3267899 46.3450851 46.3624878 46.3789864 46.3945885 
            46.4092903 46.4230881 46.4359856 46.447979 46.4590721 46.4692612 46.4785461 
            46.486927 46.4944 46.5009727 46.5066376 46.5113945 46.5152473 46.5181923 
            46.5202332 46.5213661 46.5215912 46.5209122 46.5193253 46.5168343 46.5134354 
            46.5091286 46.5039177 46.4977989 46.4907761 46.4828491 46.4740181 46.4642792 
            46.45364 46.4420967 46.4296494 46.4163017 46.40205 46.386898 46.3708496 
            46.3538971 46.3360519 46.3173027 46.2976608 46.2771225 46.2556877 46.2333603 
            46.2101402 46.1860313 46.1610298 46.1351395 46.1083603 46.0806923 46.0521431 
            46.0227089 45.9923897 45.9611931 45.9291153 45.8961563 45.8623238 45.8276176 
            45.7920341 45.7555847 45.7182617 45.680069 45.6410141 45.6010895 45.5603065 
            45.5186615 45.4761581 45.4327965 45.3885803 45.3435135 45.2975922 45.250824 
            45.2475204 45.298275 45.3481903 45.3972588 45.4454842 45.4928589 45.5393867 
            45.5850563 45.6298752 45.6738358 45.716938 45.7591782 45.8005562 45.8410683 
            45.8807106 45.919487 45.9573936 45.9944267 46.0305862 46.0658722 46.1002769 
            46.1338043 46.1664505 46.1982155 46.2290955 46.2590904 46.2881966 46.3164177 
            46.34375 46.3701897 46.3957367 46.4203911 46.444149 46.4670143 46.4889832 
            46.5100517 46.5302238 46.5494957 46.5678635 46.5853348 46.601902 46.6175652 
            46.6323242 46.6461792 46.6591263 46.6711693 46.6823082 46.6925354 46.7018585 
            46.7102737 46.7177773 46.7243729 46.7300606 46.7348404 46.7387047 46.7416649 
            46.7437134 46.7448502 46.745079 46.7443962 46.7428017 46.7402992 46.7368851 
            46.732563 46.7273293 46.7211876 46.714138 46.7061806 46.6973114 46.6875343 
            46.6768532 46.6652641 46.6527672 46.6393623 46.6250572 46.6098442 46.5937309 
            46.5767136 46.5587921 46.5399704 46.5202484 46.49963 46.4781113 46.4556961 
            46.4323807 46.4081764 46.3830719 46.3570786 46.3301926 46.3024178 46.2737541 
            46.2442017 46.2137642 46.1824417 46.150238 46.1171494 46.0831833 46.0483398 
            46.012619 45.9760208 45.938549 45.9002075 45.8609962 45.820919 45.7799721 
            45.7381668 45.6954956 45.6519623 45.6075745 45.5623283 45.5162277 45.4692802 
            45.4650688 45.5160255 45.5661316 45.6153946 45.6638069 45.7113686 45.7580757 
            45.8039284 45.8489227 45.893055 45.9363251 45.9787292 46.0202713 46.0609436 
            46.1007423 46.1396751 46.1777306 46.2149086 46.2512131 46.2866364 46.3211784 
            46.3548355 46.3876114 46.4195023 46.4505043 46.4806175 46.5098419 46.5381737 
            46.5656128 46.5921593 46.6178093 46.6425629 46.6664162 46.689373 46.7114258 
            46.7325821 46.7528305 46.7721825 46.7906227 46.8081627 46.8247948 46.8405228 
            46.8553391 46.8692513 46.8822517 46.8943443 46.9055252 46.9157944 46.9251556 
            46.9336014 46.9411354 46.9477577 46.9534683 46.9582672 46.9621506 46.9651184 
            46.9671745 46.9683189 46.9685478 46.9678612 46.9662628 46.9637489 46.9603233 
            46.9559822 46.9507294 46.944561 46.9374847 46.929493 46.9205894 46.9107742 
            46.9000473 46.8884125 46.8758659 46.8624077 46.8480453 46.8327713 46.8165932 
            46.7995071 46.781517 46.762619 46.7428207 46.7221146 46.7005119 46.6780052 
            46.6546021 46.6302986 46.6050949 46.5789986 46.5520058 46.5241203 46.4953423 
            46.4656715 46.4351158 46.4036674 46.3713341 46.3381157 46.3040161 46.2690315 
            46.2331696 46.1964302 46.1588097 46.1203194 46.0809517 46.0407143 45.9996109 
            45.957634 45.9147987 45.8710938 45.8265305 45.7811089 45.7348289 45.6876945 
            45.6825752 45.7337303 45.7840347 45.8334885 45.8820915 45.9298363 45.9767265 
            46.0227585 46.0679283 46.112236 46.155674 46.1982498 46.2399521 46.2807846 
            46.3207436 46.3598251 46.3980331 46.4353561 46.4718056 46.5073662 46.5420456 
            46.57584 46.6087456 46.6407623 46.6718864 46.7021217 46.7314606 46.7599068 
            46.7874527 46.814106 46.8398552 46.8647079 46.8886566 46.911705 46.9338455 
            46.9550858 46.9754181 46.9948425 47.0133629 47.0309715 47.0476685 47.0634575 
            47.0783348 47.0923004 47.1053543 47.1174965 47.1287193 47.1390343 47.1484299 
            47.1569099 47.1644745 47.1711235 47.176857 47.181675 47.1855736 47.1885529 
            47.1906204 47.1917648 47.1919937 47.1913071 47.1897011 47.1871796 47.1837387 
            47.1793785 47.1741066 47.1679153 47.1608086 47.1527824 47.1438446 47.1339912 
            47.1232224 47.1115379 47.0989418 47.085434 47.0710106 47.0556793 47.0394325 
            47.0222778 47.0042152 46.9852448 46.9653664 46.9445801 46.9228897 46.9002914 
            46.8767929 46.8523941 46.8270912 46.8008919 46.7737923 46.7457962 46.7169037 
            46.6871147 46.6564369 46.6248627 46.5924034 46.5590553 46.5248184 46.4896965 
            46.4536896 46.4168053 46.3790398 46.3403931 46.3008728 46.2604752 46.2192078 
            46.1770706 46.1340637 46.0901909 46.0454521 45.9998512 45.9533882 45.9060707 
            45.9000359 45.9513893 46.0018883 46.0515366 46.1003265 46.148262 46.1953354 
            46.2415466 46.2868958 46.3313751 46.3749847 46.4177284 46.4595947 46.5005875 
            46.5407028 46.5799408 46.6182976 46.6557693 46.6923599 46.7280655 46.7628822 
            46.7968102 46.8298454 46.8619881 46.8932381 46.9235916 46.9530487 46.9816055 
            47.0092621 47.0360184 47.0618744 47.0868225 47.1108704 47.1340065 47.1562386 
            47.1775627 47.1979752 47.2174797 47.2360725 47.2537498 47.2705154 47.2863693 
            47.3013077 47.3153267 47.328434 47.3406219 47.3518944 47.3622475 47.3716812 
            47.3801956 47.3877907 47.3944664 47.4002228 47.4050598 47.4089737 47.4119644 
            47.4140396 47.4151917 47.4154205 47.4147301 47.4131165 47.4105835 47.4071312 
            47.4027557 47.3974609 47.391243 47.3841095 47.3760529 47.3670769 47.3571854 
            47.3463707 47.3346405 47.3219948 47.3084335 47.2939529 47.2785568 47.262249 
            47.2450256 47.2268906 47.2078438 47.1878853 47.1670151 47.145237 47.122551 
            47.0989609 47.0744629 47.0490608 47.0227547 46.9955482 46.9674377 46.9384308 
            46.9085274 46.8777237 46.8460274 46.8134384 46.7799568 46.7455826 46.7103233 
            46.6741753 46.637146 46.5992279 46.5604324 46.5207558 46.4802017 46.4387703 
            46.3964653 46.3532906 46.3092422 46.264328 46.2185516 46.1719055 46.1244011 
            46.1174431 46.1689949 46.2196922 46.2695351 46.3185196 46.3666382 46.4138985 
            46.460289 46.5058136 46.5504684 46.5942535 46.6371613 46.6791954 46.7203484 
            46.7606239 46.8000145 46.8385239 46.8761444 46.9128799 46.9487228 46.9836807 
            47.0177422 47.0509071 47.0831795 47.1145515 47.1450272 47.1745987 47.20327 
            47.2310371 47.2579002 47.2838593 47.3089104 47.3330498 47.3562813 47.3786011 
            47.4000092 47.4205055 47.4400864 47.4587517 47.4765015 47.4933357 47.5092506 
            47.5242462 47.5383263 47.5514832 47.5637207 47.5750389 47.5854301 47.594902 
            47.6034546 47.6110802 47.6177826 47.6235619 47.6284142 47.6323471 47.6353531 
            47.6374321 47.638588 47.6388206 47.6381264 47.6365089 47.6339645 47.630497 
            47.6261024 47.6207886 47.6145477 47.6073799 47.5992928 47.5902824 47.580349 
            47.5694962 47.5577164 47.5450211 47.5314026 47.5168648 47.5014076 47.4850349 
            47.4677429 47.4495354 47.4304085 47.4103699 47.3894196 47.3675537 47.34478 
            47.3210945 47.2964973 47.2709923 47.2445831 47.2172661 47.1890488 47.1599236 
            47.1299019 47.0989761 47.0671539 47.0344353 47.0008202 46.9663124 46.930912 
            46.8946228 46.8574448 46.8193779 46.7804298 46.7405968 46.6998825 46.658287 
            46.615818 46.5724716 46.5282516 46.4831619 46.4372025 46.390377 46.3426857 
            46.3347969 46.3865509 46.4374466 46.487484 46.5366554 46.5849648 46.6324081 
            46.6789856 46.7246857 46.769516 46.8134727 46.8565483 46.8987465 46.9400635 
            46.9804955 47.0200424 47.0587044 47.0964737 47.1333542 47.169342 47.2044334 
            47.2386322 47.2719307 47.3043289 47.3358269 47.3664207 47.3961143 47.4249001 
            47.4527779 47.4797478 47.5058098 47.5309563 47.5551949 47.5785179 47.6009293 
            47.6224213 47.6429977 47.6626587 47.6814003 47.6992226 47.7161217 47.7321014 
            47.7471581 47.7612915 47.7745018 47.7867889 47.7981491 47.8085861 47.8180962 
            47.8266792 47.8343353 47.8410683 47.8468666 47.8517418 47.85569 47.8587074 
            47.8607941 47.8619576 47.8621902 47.8614922 47.8598671 47.8573151 47.8538322 
            47.8494225 47.8440819 47.8378181 47.8306236 47.8225021 47.8134575 47.8034821 
            47.7925835 47.7807617 47.768013 47.7543411 47.7397461 47.7242279 47.7077866 
            47.6904259 47.6721458 47.6529427 47.6328239 47.6117897 47.5898399 47.5669708 
            47.54319 47.5184975 47.4928932 47.4663773 47.4389534 47.4106178 47.381382 
            47.3512383 47.3201904 47.2882423 47.255394 47.2216454 47.1870003 47.1514626 
            47.1150284 47.0777016 47.0394859 47.0003815 46.960392 46.9195175 46.877758 
            46.8351212 46.7916031 46.7472115 46.7019463 46.6558037 46.6087952 46.5609207 
            46.5520935 46.6040459 46.6551399 46.7053719 46.7547379 46.8032379 46.8508682 
            46.897625 46.9435081 46.9885139 47.0326385 47.0758858 47.1182518 47.159729 
            47.2003212 47.2400246 47.2788391 47.316761 47.3537865 47.3899155 47.425148 
            47.4594803 47.4929085 47.5254364 47.5570602 47.5877762 47.6175842 47.6464844 
            47.6744766 47.7015533 47.7277184 47.7529678 47.7773018 47.8007202 47.8232193 
            47.844799 47.8654556 47.8851929 47.9040108 47.9219017 47.9388695 47.9549141 
            47.9700317 47.9842224 47.9974861 48.0098228 48.0212288 48.0317078 48.041256 
            48.0498734 48.05756 48.0643158 48.0701408 48.0750351 48.0789986 48.0820274 
            48.0841255 48.085289 48.0855255 48.0848236 48.0831947 48.0806274 48.0771332 
            48.0727043 48.0673447 48.0610542 48.053833 48.045681 48.0365982 48.0265846 
            48.0156403 48.0037689 47.9909706 47.9772415 47.9625893 47.9470062 47.9305038 
            47.9130707 47.8947182 47.8754425 47.8552437 47.8341217 47.8120842 47.7891235 
            47.7652473 47.7404556 47.7147484 47.6881294 47.6605949 47.6321487 47.6027946 
            47.5725327 47.5413628 47.509285 47.4763069 47.4424248 47.4076424 47.3719635 
            47.3353844 47.2979126 47.2595444 47.2202873 47.1801376 47.1391029 47.0971794 
            47.0543747 47.010685 46.9661179 46.9206734 46.8743553 46.8271599 46.7790985 
            46.7693253 46.8214798 46.872776 46.9232025 46.9727631 47.02145 47.0692673 
            47.1162071 47.1622696 47.2074509 47.2517548 47.2951698 47.3376999 47.3793449 
            47.4200974 47.4599571 47.4989243 47.5369949 47.5741653 47.6104393 47.6458092 
            47.6802788 47.7138405 47.7464981 47.7782478 47.8090858 47.8390121 47.8680267 
            47.8961296 47.9233131 47.949585 47.9749336 47.9993668 48.0228767 48.0454636 
            48.067131 48.0878716 48.1076889 48.1265793 48.1445427 48.1615791 48.1776886 
            48.1928673 48.2071152 48.2204285 48.2328148 48.2442665 48.2547874 48.2643738 
            48.2730255 48.2807465 48.287529 48.2933769 48.2982903 48.302269 48.3053131 
            48.3074188 48.3085861 48.3088226 48.3081207 48.3064804 48.3039093 48.300396 
            48.2959518 48.2905693 48.284256 48.2770042 48.2688179 48.259697 48.2496452 
            48.2386589 48.226738 48.2138901 48.2001076 48.1853943 48.1697502 48.1531792 
            48.1356773 48.1172523 48.0978966 48.0776176 48.0564117 48.0342865 48.0112343 
            47.9872627 47.9623718 47.9365654 47.9098358 47.8821945 47.8536339 47.8241615 
            47.7937813 47.7624855 47.7302818 47.6971741 47.6631584 47.6282349 47.5924149 
            47.5556908 47.5180702 47.4795532 47.4401398 47.3998337 47.3586349 47.3165474 
            47.273571 47.2297134 47.1849709 47.1393471 47.0928459 47.0454674 46.9972153 
            46.9864922 47.0388527 47.0903435 47.1409683 47.1907234 47.2396011 47.2876053 
            47.3347282 47.3809738 47.4263344 47.4708099 47.5143967 47.5570946 47.5988998 
            47.6398163 47.6798325 47.7189522 47.7571716 47.7944908 47.8309097 47.8664207 
            47.9010239 47.9347229 47.9675064 47.999382 48.0303459 48.0603905 48.0895233 
            48.117733 48.1450272 48.171402 48.1968536 48.2213821 48.2449875 48.2676659 
            48.2894173 48.3102455 48.3301392 48.3491058 48.3671417 48.3842468 48.4004173 
            48.415657 48.4299622 48.4433327 48.4557686 48.4672661 48.477829 48.4874535 
            48.4961395 48.503891 48.5107002 48.5165749 48.5215073 48.5255013 48.528553 
            48.5306702 48.5318451 48.5320778 48.5313759 48.5297279 48.5271454 48.5236206 
            48.5191574 48.5137558 48.507412 48.5001335 48.4919128 48.4827576 48.4726639 
            48.4616356 48.4496651 48.4367638 48.4229279 48.4081535 48.3924484 48.3758125 
            48.358242 48.3397408 48.3203087 48.2999458 48.2786598 48.256443 48.2332993 
            48.2092323 48.1842422 48.158329 48.1314964 48.1037445 48.0750694 48.0454826 
            48.0149765 47.9835587 47.9512291 47.9179878 47.8838348 47.8487778 47.8128128 
            47.7759438 47.7381744 47.6995049 47.659935 47.6194687 47.5781097 47.5358582 
            47.4927139 47.4486809 47.4037628 47.3579597 47.3112755 47.2637138 47.215271 
            47.2035866 47.2561531 47.3078461 47.3586693 47.4086151 47.4576874 47.5058784 
            47.5531883 47.5996132 47.6451492 47.6898003 47.7335587 47.7764282 47.8183975 
            47.8594742 47.8996506 47.9389229 47.9772949 48.0147629 48.0513229 48.0869751 
            48.1217155 48.1555481 48.1884651 48.2204666 48.2515488 48.2817154 48.3109627 
            48.3392906 48.3666916 48.3931694 48.4187241 48.4433517 48.4670486 48.4898186 
            48.5116577 48.5325661 48.5525436 48.5715866 48.589695 48.6068649 48.6231041 
            48.638401 48.6527634 48.6661873 48.6786728 48.6902199 48.7008247 48.7104874 
            48.7192078 48.7269897 48.7338295 48.7397232 48.7446785 48.7486877 48.7517548 
            48.7538757 48.7550545 48.755291 48.7545853 48.7529335 48.7503395 48.7467995 
            48.7423172 48.7368927 48.730526 48.723217 48.7149658 48.7057724 48.6956367 
            48.6845627 48.6725502 48.6595955 48.6457024 48.6308708 48.6151009 48.5983963 
            48.5807571 48.5621796 48.5426712 48.5222282 48.5008545 48.47855 48.4553146 
            48.4311523 48.4060631 48.3800468 48.3531075 48.3252411 48.2964554 48.2667465 
            48.2361221 48.2045784 48.1721191 48.1387482 48.1044617 48.0692635 48.0331573 
            47.9961433 47.9582214 47.9193993 47.879673 47.8390465 47.7975235 47.7551041 
            47.711792 47.6675873 47.6224937 47.5765114 47.529644 47.4818916 47.4332619 
            47.4206085 47.4733772 47.5252762 47.5762978 47.6264381 47.6757011 47.7240829 
            47.7715759 47.8181839 47.863903 47.9087257 47.9526596 47.9956932 48.0378304 
            48.0790672 48.1194038 48.1588326 48.1973572 48.2349701 48.2716789 48.3074722 
            48.34235 48.3763161 48.4093628 48.4414902 48.4726982 48.5029869 48.5323486 
            48.5607872 48.5882988 48.6148834 48.6405411 48.6652641 48.6890564 48.7119179 
            48.7338448 48.754837 48.7748947 48.794014 48.8121948 48.8294334 48.8457375 
            48.8610992 48.8755188 48.8889961 48.9015312 48.9131203 48.9237671 48.9334717 
            48.9422302 48.9500389 48.9569054 48.9628258 48.9678001 48.9718246 48.9749031 
            48.9770355 48.9782181 48.9784584 48.9777451 48.9760895 48.973484 48.9699287 
            48.9654312 48.9599838 48.9535904 48.9462547 48.9379692 48.9287376 48.9185638 
            48.907444 48.8953819 48.8823738 48.8684273 48.8535347 48.8377037 48.8209305 
            48.8032188 48.7845688 48.7649841 48.7444572 48.7229996 48.7006035 48.6772766 
            48.653019 48.6278267 48.6017075 48.5746613 48.5466843 48.5177841 48.487957 
            48.4572105 48.4255409 48.392952 48.3594475 48.3250237 48.2896881 48.253437 
            48.2162781 48.1782074 48.1392288 48.09935 48.0585632 48.0168762 47.9742889 
            47.9308052 47.886425 47.8411522 47.7949905 47.7479401 47.7000008 47.6511803 
            47.6375542 47.6905289 47.74263 47.7938499 47.8441887 47.8936424 47.942215 
            47.9898949 48.0366859 48.0825806 48.1275826 48.1716881 48.2148933 48.2571983 
            48.2985954 48.3390884 48.3786774 48.4173508 48.4551163 48.4919662 48.5279045 
            48.5629196 48.5970192 48.6301994 48.6624565 48.6937904 48.7241974 48.7536774 
            48.7822266 48.8098488 48.8365402 48.8622971 48.8871231 48.9110107 48.9339638 
            48.9559784 48.9770546 48.9971886 49.0163841 49.0346375 49.0519485 49.0683174 
            49.0837402 49.098217 49.1117477 49.1243362 49.1359711 49.1466637 49.1564026 
            49.1651955 49.1730385 49.1799316 49.1858749 49.1908684 49.194912 49.1980019 
            49.2001419 49.2013321 49.2015686 49.2008553 49.199192 49.1965752 49.1930084 
            49.1884918 49.1830254 49.1766052 49.1692352 49.1609192 49.1516533 49.1414375 
            49.1302719 49.1181602 49.1051025 49.0910988 49.0761452 49.0602531 49.0434113 
            49.025631 49.0069046 48.9872398 48.9666328 48.9450874 48.9226036 48.8991814 
            48.8748283 48.8495369 48.8233109 48.796154 48.7680664 48.7390518 48.7091064 
            48.6782379 48.6464424 48.6137238 48.5800858 48.5455284 48.5100479 48.4736557 
            48.436348 48.3981285 48.3589973 48.3189583 48.2780113 48.2361565 48.1934052 
            48.1497498 48.1051941 48.0597458 48.013401 47.9661636 47.9180412 47.8690262 
            47.8544197 47.9076004 47.9599037 48.011322 48.0618591 48.1115074 48.1602669 
            48.2081375 48.2551117 48.3011894 48.3463669 48.3906441 48.434021 48.47649 
            48.518055 48.5587082 48.5984497 48.6372795 48.6751938 48.7121887 48.7482681 
            48.7834244 48.8176613 48.8509712 48.883358 48.914814 48.945343 48.9749413 
            49.0036049 49.0313377 49.058136 49.0839958 49.1089172 49.1329041 49.1559448 
            49.178051 49.1992111 49.2194252 49.2387009 49.2570267 49.2744064 49.2908401 
            49.306324 49.3208618 49.334446 49.3470802 49.3587685 49.3694992 49.3792801 
            49.3881073 49.3959846 49.4029045 49.4088707 49.4138832 49.417942 49.4210472 
            49.4231949 49.4243889 49.4246292 49.423912 49.4222412 49.4196129 49.4160347 
            49.411499 49.4060059 49.3995628 49.3921661 49.383812 49.3745079 49.364254 
            49.3530426 49.3408813 49.3277702 49.3137093 49.2987022 49.2827415 49.2658348 
            49.247982 49.2291794 49.2094345 49.1887474 49.1671143 49.1445427 49.1210289 
            49.0965729 49.0711823 49.0448532 49.0175896 48.9893875 48.9602585 48.9301949 
            48.8992004 48.8672791 48.8344307 48.8006592 48.7659607 48.7303429 48.6938057 
            48.6563492 48.6179771 48.5786934 48.5384941 48.4973869 48.455368 48.4124451 
            48.368618 48.3238907 48.2782593 48.2317352 48.1843147 48.1359978 48.0867958 
            48.0711975 48.124588 48.1770935 48.228714 48.2794495 48.3292923 48.3782425 
            48.4263 48.4734573 48.5197144 48.5650711 48.6095238 48.6530724 48.6957092 
            48.7374382 48.7782516 48.8181496 48.857132 48.8951988 48.9323425 48.9685631 
            49.0038605 49.0382309 49.0716743 49.104187 49.1357689 49.16642 49.1961365 
            49.2249184 49.252758 49.2796631 49.3056259 49.3306503 49.3547325 49.3778687 
            49.4000587 49.4213028 49.4416008 49.4609528 49.479351 49.4968033 49.5133018 
            49.5288467 49.5434418 49.5570831 49.5697708 49.581501 49.5922775 49.6020966 
            49.6109619 49.618866 49.6258163 49.6318092 49.6368408 49.6409149 49.6440315 
            49.6461906 49.6473885 49.6476288 49.6469078 49.6452293 49.6425934 49.6389999 
            49.6344452 49.628933 49.6224632 49.6150322 49.6066475 49.5973053 49.5870094 
            49.5757561 49.5635452 49.5503807 49.5362625 49.5211945 49.5051689 49.4881973 
            49.4702721 49.4513969 49.431572 49.4108009 49.38908 49.3664169 49.3428078 
            49.3182564 49.2927628 49.2663269 49.2389565 49.2106438 49.1813965 49.1512108 
            49.1200943 49.088047 49.055069 49.0211601 48.9863281 48.9505692 48.9138832 
            48.8762817 48.8377571 48.798317 48.7579575 48.7166862 48.6745033 48.6314125 
            48.5874138 48.5425072 48.4967003 48.4499893 48.4023819 48.353878 48.3044815 
            48.2878876 48.3414841 48.3941956 48.4460182 48.4969521 48.5469894 48.5961342 
            48.6443787 48.6917229 48.738163 48.783699 48.8283234 48.8720436 48.9148483 
            48.9567413 48.9977188 49.0377731 49.0769119 49.1151276 49.15242 49.1887817 
            49.2242203 49.258728 49.292305 49.3249474 49.3566551 49.3874283 49.417263 
            49.4461594 49.4741135 49.5011253 49.5271912 49.5523148 49.5764923 49.59972 
            49.6220016 49.6433296 49.6637115 49.683136 49.7016106 49.7191315 49.7356987 
            49.7513084 49.7659607 49.7796555 49.7923927 49.8041725 49.814991 49.824852 
            49.8337517 49.8416901 49.8486671 49.8546829 49.8597336 49.8638268 49.8669548 
            49.8691216 49.8703232 49.8705635 49.8698425 49.8681564 49.865509 49.8619003 
            49.8573265 49.8517952 49.8452988 49.837841 49.829422 49.8200417 49.8097 
            49.7984009 49.7861443 49.7729263 49.7587547 49.7436218 49.7275352 49.7104912 
            49.6924934 49.673542 49.6536407 49.6327858 49.6109772 49.5882225 49.5645218 
            49.5398712 49.5142746 49.4877357 49.4602509 49.4318275 49.402462 49.3721581 
            49.3409195 49.3087425 49.2756348 49.2415924 49.2066193 49.1707153 49.1338882 
            49.0961342 49.057457 49.0178604 48.9773445 48.9359093 48.8935585 48.8502998 
            48.8061256 48.7610435 48.7150536 48.6681633 48.620369 48.5716743 48.5220833 
            48.5044823 48.5582924 48.6112099 48.6632347 48.7143669 48.7645988 48.8139343 
            48.8623695 48.9099007 48.9565239 49.0022354 49.047039 49.0909309 49.1339073 
            49.1759644 49.2171021 49.2573166 49.2966118 49.3349762 49.3724174 49.4089241 
            49.4445038 49.4791489 49.5128593 49.5456314 49.5774651 49.6083603 49.6383171 
            49.6673241 49.6953926 49.7225113 49.7486839 49.7739067 49.7981796 49.8215027 
            49.8438721 49.8652878 49.8857498 49.9052544 49.9238014 49.9413948 49.9580269 
            49.9736977 49.9884109 50.0021591 50.0149498 50.0267754 50.0376396 50.0475388 
            50.0564728 50.0644455 50.0714493 50.0774879 50.0825615 50.0866699 50.0898132 
            50.0919876 50.0931931 50.0934372 50.0927124 50.0910187 50.0883598 50.0847359 
            50.0801468 50.0745888 50.0680656 50.0605774 50.0521278 50.0427094 50.0323296 
            50.0209846 50.0086746 49.9954071 49.9811745 49.9659805 49.9498291 49.9327202 
            49.91465 49.8956223 49.8756371 49.8546982 49.8328056 49.8099594 49.7861633 
            49.7614136 49.735714 49.7090683 49.6814766 49.6529388 49.623455 49.5930328 
            49.5616684 49.5293617 49.4961205 49.4619446 49.4268303 49.390789 49.3538132 
            49.3159103 49.2770805 49.2373238 49.1966476 49.1550484 49.1125336 49.0690994 
            49.0247536 48.9794922 48.9333229 48.8862457 48.8382645 48.7893791 48.7395935 
            48.7209854 48.7750015 48.828125 48.880352 48.9316864 48.9821167 49.0316467 
            49.0802689 49.1279869 49.1747932 49.2206879 49.265667 49.3097305 49.3528786 
            49.3950996 49.4364014 49.4767761 49.5162239 49.5547447 49.5923309 49.6289864 
            49.6647072 49.6994896 49.7333336 49.7662354 49.7981987 49.829216 49.8592911 
            49.8884163 49.9165955 49.943821 49.9701004 49.9954224 50.0197945 50.0432091 
            50.06567 50.0871735 50.1077156 50.1273003 50.1459198 50.1635818 50.1802826 
            50.1960182 50.2107887 50.2245941 50.2374344 50.2493095 50.2602158 50.270153 
            50.2791252 50.2871284 50.2941628 50.3002243 50.3053207 50.3094444 50.3125992 
            50.3147812 50.3159943 50.3162384 50.3155098 50.3138123 50.311142 50.3075027 
            50.3028946 50.2973137 50.2907677 50.2832489 50.2747612 50.2653046 50.2548828 
            50.2434921 50.2311363 50.2178116 50.2035217 50.1882706 50.1720543 50.1548729 
            50.1367302 50.1176262 50.0975647 50.0765419 50.0545578 50.03162 50.0077286 
            49.9828796 49.9570808 49.9303284 49.9026222 49.87397 49.8443718 49.8138275 
            49.7823372 49.7499008 49.7165298 49.6822128 49.6469612 49.610775 49.5736542 
            49.5356026 49.4966164 49.4567032 49.4158669 49.3741035 49.3314209 49.2878151 
            49.2432938 49.1978531 49.1515045 49.1042404 49.0560722 49.0069962 48.9570122 
            48.9373817 48.9916115 49.0449409 49.097374 49.1489067 49.1995392 49.2492599 
            49.2980766 49.3459816 49.392971 49.439045 49.4842033 49.5284424 49.5717583 
            49.6141472 49.6556129 49.6961479 49.7357521 49.7744255 49.8121605 49.8489609 
            49.8848228 49.9197426 49.9537239 49.9867592 50.0188484 50.0499878 50.0801811 
            50.1094246 50.1377144 50.1650543 50.1914368 50.2168617 50.2413292 50.2648392 
            50.2873878 50.308979 50.3296051 50.3492661 50.3679619 50.3856964 50.402462 
            50.4182625 50.4330902 50.4469528 50.4598465 50.4717674 50.4827194 50.4926987 
            50.5017052 50.5097389 50.5167999 50.5228882 50.5280037 50.5321465 50.5353127 
            50.5375061 50.538723 50.5389671 50.5382347 50.5365295 50.5338516 50.5301971 
            50.5255699 50.5199661 50.5133934 50.5058441 50.4973221 50.4878273 50.4773636 
            50.4659271 50.4535217 50.4401436 50.4257965 50.4104843 50.3941994 50.3769493 
            50.3587341 50.3395538 50.3194122 50.2983055 50.2762337 50.2532043 50.2292137 
            50.2042694 50.1783638 50.1515045 50.1236916 50.0949211 50.0652046 50.0345383 
            50.0029221 49.9703598 49.9368515 49.902401 49.8670082 49.830677 49.7934074 
            49.7552032 49.7160645 49.6759949 49.6349945 49.5930672 49.5502167 49.5064392 
            49.4617386 49.4161224 49.3695908 49.3221436 49.2737808 49.224514 49.1743355 
            49.1536789 49.2081184 49.2616577 49.3142967 49.3660316 49.4168587 49.4667778 
            49.5157814 49.5638771 49.6110497 49.6573067 49.7026443 49.7470551 49.7905426 
            49.8331032 49.8747292 49.9154243 49.9551888 49.9940109 50.0318985 50.0688477 
            50.1048508 50.1399117 50.1740265 50.2071915 50.2394104 50.2706757 50.3009911 
            50.330349 50.3587532 50.3862 50.4126892 50.4382172 50.4627838 50.4863853 
            50.5090256 50.5307007 50.5514107 50.5711517 50.5899239 50.6077309 50.6245613 
            50.6404266 50.6553154 50.6692352 50.6821785 50.694149 50.705143 50.7151604 
            50.724205 50.7322731 50.7393646 50.7454758 50.7506104 50.7547684 50.7579498 
            50.7601509 50.7613716 50.7616196 50.7608833 50.7591705 50.7564812 50.7528114 
            50.7481651 50.7425423 50.735939 50.728363 50.7198067 50.7102737 50.6997681 
            50.6882858 50.675827 50.6623955 50.6479912 50.6326141 50.6162682 50.5989494 
            50.5806618 50.5614014 50.5411758 50.5199852 50.4978294 50.4747047 50.4506187 
            50.4255714 50.3995628 50.3725967 50.3446732 50.3157883 50.2859535 50.2551613 
            50.2234192 50.1907272 50.1570854 50.1224976 50.0869675 50.0504913 50.013073 
            49.9747162 49.9354248 49.895195 49.8540306 49.8119392 49.7689171 49.7249641 
            49.6800919 49.6342964 49.5875778 49.5399437 49.491394 49.4419289 49.3915558 
            49.3698654 49.4245148 49.4782639 49.5311089 49.583046 49.6340752 49.6841888 
            49.733387 49.7816696 49.8290291 49.8754692 49.9209862 49.9655724 50.0092316 
            50.0519562 50.09375 50.1346092 50.1745262 50.2135086 50.251545 50.2886391 
            50.3247871 50.3599854 50.3942375 50.427536 50.4598808 50.491272 50.5217094 
            50.5511856 50.5797043 50.6072617 50.6338539 50.6594849 50.6841507 50.7078476 
            50.7305794 50.7523422 50.7731323 50.7929535 50.8118057 50.8296776 50.8465805 
            50.8625069 50.8774567 50.8914299 50.9044266 50.9164467 50.9274864 50.9375458 
            50.9466248 50.9547234 50.9618454 50.9679832 50.9731369 50.977314 50.9805031 
            50.9827156 50.9839439 50.9841881 50.9834518 50.9817314 50.9790306 50.9753494 
            50.9706841 50.9650345 50.9584084 50.950798 50.9422073 50.9326363 50.9220886 
            50.9105606 50.8980522 50.8845673 50.8701057 50.8546677 50.838253 50.8208618 
            50.8025017 50.783165 50.7628593 50.741581 50.7193336 50.6961212 50.6719398 
            50.6467896 50.6206779 50.5936012 50.5655632 50.5365677 50.5066109 50.4756966 
            50.4438286 50.4110069 50.3772316 50.3425064 50.3068314 50.2702103 50.2326431 
            50.1941338 50.154686 50.114296 50.0729713 50.0307121 49.9875183 49.9433937 
            49.8983421 49.8523674 49.8054657 49.7576447 49.7089005 49.6592445 49.6086731 
            49.5859375 49.6408043 49.6947632 49.7478142 49.7999535 49.851181 49.9014931 
            49.9508858 49.9993553 50.0469055 50.0935287 50.1392212 50.1839867 50.2278175 
            50.2707138 50.3126717 50.3536911 50.3937683 50.4329033 50.4710922 50.5083351 
            50.5446243 50.5799675 50.6143532 50.6477852 50.6802597 50.7117767 50.7423325 
            50.7719307 50.80056 50.828228 50.8549309 50.880661 50.905426 50.9292221 
            50.9520416 50.9738922 50.9947701 51.0146713 51.033596 51.0515404 51.068512 
            51.0845032 51.099514 51.1135445 51.1265907 51.1386566 51.1497421 51.1598434 
            51.1689606 51.1770935 51.1842384 51.190403 51.1955795 51.1997719 51.2029762 
            51.2051964 51.2064285 51.2066765 51.2059364 51.2042084 51.2014961 51.1977997 
            51.1931152 51.1874428 51.1807899 51.1731491 51.1645241 51.1549149 51.1443214 
            51.1327477 51.1201897 51.1066513 51.0921288 51.0766296 51.0601501 51.0426903 
            51.0242538 51.0048409 50.9844513 50.963089 50.9407539 50.9174461 50.8931656 
            50.8679161 50.8417015 50.8145142 50.7863655 50.7572517 50.7271767 50.6961403 
            50.6641426 50.6311874 50.5972786 50.5624161 50.5265999 50.48983 50.4521179 
            50.413456 50.373848 50.3332977 50.2918091 50.249382 50.2060165 50.1617203 
            50.1164894 50.0703316 50.0232468 49.975235 49.9263039 49.8764496 49.8256836 
            49.8018951 49.8569756 49.9111443 49.9644051 50.0167465 50.0681763 50.1186867 
            50.1682739 50.2169342 50.2646713 50.3114777 50.3573532 50.4022942 50.4462967 
            50.4893646 50.5314865 50.57267 50.6129074 50.6521988 50.6905365 50.7279282 
            50.7643623 50.7998466 50.8343697 50.8679352 50.9005394 50.9321823 50.9628639 
            50.9925766 51.0213242 51.0491028 51.0759087 51.1017456 51.1266098 51.1505013 
            51.1734161 51.1953506 51.2163124 51.2362938 51.2552948 51.2733154 51.2903519 
            51.3064079 51.3214798 51.3355637 51.3486671 51.3607826 51.3719101 51.3820534 
            51.3912048 51.3993721 51.4065475 51.412735 51.4179344 51.422142 51.4253616 
            51.4275894 51.4288254 51.4290733 51.4283295 51.4265976 51.4238739 51.4201622 
            51.4154587 51.4097672 51.4030838 51.3954124 51.3867531 51.3771057 51.3664703 
            51.354847 51.3422394 51.3286438 51.314064 51.2985039 51.2819557 51.2644272 
            51.2459145 51.2264252 51.2059555 51.1845055 51.1620789 51.1386757 51.1142998 
            51.0889511 51.0626259 51.0353355 51.0070724 50.9778404 50.9476433 50.916481 
            50.8843575 50.8512726 50.8172264 50.7822227 50.7462654 50.7093506 50.6714859 
            50.6326714 50.592907 50.5521965 50.5105438 50.4679489 50.4244118 50.37994 
            50.3345299 50.2881889 50.2409172 50.1927185 50.1435928 50.093544 50.0425758 
            50.0177307 50.0730247 50.1274071 50.1808739 50.2334251 50.2850571 50.335762 
            50.3855438 50.4343987 50.4823227 50.5293159 50.5753708 50.6204872 50.664669 
            50.7079048 50.7501945 50.7915421 50.8319397 50.8713837 50.9098778 50.9474182 
            50.9839973 51.0196228 51.0542831 51.0879822 51.1207199 51.1524887 51.1832924 
            51.2131233 51.2419853 51.2698746 51.2967911 51.322731 51.3476944 51.3716812 
            51.3946877 51.4167137 51.4377594 51.4578209 51.4768982 51.4949913 51.5120964 
            51.5282173 51.5433502 51.5574951 51.5706482 51.5828133 51.5939865 51.6041679 
            51.6133575 51.6215591 51.6287651 51.6349754 51.6401939 51.6444206 51.6476517 
            51.6498909 51.6511307 51.6513824 51.6506348 51.6488953 51.6461601 51.6424332 
            51.6377106 51.6319923 51.6252861 51.6175842 51.6088867 51.5992012 51.5885239 
            51.5768547 51.5641937 51.5505447 51.5359077 51.5202789 51.5036659 51.4860687 
            51.4674835 51.4479141 51.4273605 51.4058228 51.3833084 51.3598099 51.3353348 
            51.3098831 51.2834549 51.2560539 51.2276764 51.1983299 51.1680107 51.1367264 
            51.1044731 51.0712547 51.0370712 51.0019302 50.9658279 50.9287682 50.8907509 
            50.8517799 50.8118591 50.7709885 50.7291679 50.6864052 50.6426964 50.5980453 
            50.5524597 50.5059357 50.458477 50.4100876 50.3607712 50.310524 50.2593575 
            50.2334442 50.2889557 50.3435478 50.3972244 50.4499817 50.5018158 50.5527229 
            50.6026993 50.6517448 50.6998596 50.747036 50.7932739 50.8385696 50.8829231 
            50.9263306 50.968792 51.0103035 51.0508614 51.0904617 51.1291084 51.1667976 
            51.2035255 51.2392921 51.2740898 51.3079262 51.3407936 51.3726883 51.403614 
            51.433567 51.4625473 51.4905472 51.5175705 51.5436172 51.5686798 51.592762 
            51.6158638 51.6379776 51.6591072 51.6792488 51.6984024 51.716568 51.7337456 
            51.7499313 51.7651253 51.7793236 51.7925339 51.8047447 51.8159637 51.8261871 
            51.8354149 51.843647 51.8508835 51.8571205 51.8623619 51.8666039 51.8698502 
            51.8720932 51.8733444 51.8735924 51.8728447 51.8710976 51.868351 51.8646088 
            51.8598671 51.854126 51.8473892 51.8396568 51.8309288 51.8212013 51.8104782 
            51.7987633 51.7860527 51.7723465 51.7576523 51.7419624 51.7252808 51.7076111 
            51.6889496 51.6693001 51.6486664 51.6270447 51.604435 51.5808449 51.5562706 
            51.5307159 51.5041809 51.4766693 51.4481773 51.4187126 51.3882751 51.3568611 
            51.324482 51.2911301 51.256813 51.2215271 51.1852837 51.1480751 51.1099052 
            51.0707817 51.0307007 50.989666 50.9476814 50.904747 50.8608665 50.81604 
            50.7702713 50.7235641 50.6759186 50.6273384 50.5778275 50.5273857 50.4760132 
            50.449028 50.5047531 50.5595627 50.6134491 50.6664124 50.7184486 50.769558 
            50.8197327 50.8689728 50.9172745 50.9646378 51.0110588 51.0565338 51.1010628 
            51.1446457 51.1872711 51.2289467 51.2696648 51.3094254 51.3482285 51.3860664 
            51.4229393 51.458847 51.4937897 51.5277596 51.5607567 51.5927811 51.6238327 
            51.653904 51.6829987 51.711113 51.7382469 51.7643967 51.7895584 51.8137398 
            51.8369331 51.8591347 51.880352 51.9005737 51.9198074 51.9380455 51.9552917 
            51.9715424 51.9867973 52.0010529 52.0143166 52.0265808 52.0378418 52.0481071 
            52.057373 52.0656395 52.0729027 52.0791664 52.0844269 52.0886879 52.0919456 
            52.0942001 52.0954552 52.0957031 52.0949516 52.0931969 52.0904427 52.0866814 
            52.0819206 52.0761604 52.069397 52.0616302 52.0528679 52.0431023 52.0323372 
            52.0205727 52.0078087 51.9940491 51.9792938 51.9635391 51.9467926 51.9290504 
            51.9103127 51.8905869 51.8698654 51.848156 51.8254585 51.8017731 51.7770996 
            51.751442 51.7248001 51.6971779 51.6685753 51.6389885 51.608429 51.5768929 
            51.5443802 51.5108948 51.4764404 51.4410172 51.4046249 51.3672676 51.328949 
            51.2896652 51.2494278 51.2082291 51.1660767 51.1229744 51.0789185 51.0339127 
            50.9879646 50.9410744 50.8932419 50.8444672 50.7947617 50.7441216 50.6925468 
            50.6644783 50.7204247 50.7754478 50.8295441 50.8827171 50.9349556 50.9862633 
            51.0366364 51.086071 51.1345634 51.1821136 51.2287178 51.2743759 51.3190804 
            51.3628349 51.405632 51.4474716 51.4883537 51.5282745 51.5672302 51.605217 
            51.6422386 51.6782913 51.7133713 51.7474785 51.7806091 51.8127594 51.8439369 
            51.8741302 51.9033394 51.9315681 51.9588089 51.9850655 52.0103302 52.0346069 
            52.0578957 52.0801888 52.1014862 52.1217918 52.1411018 52.1594162 52.1767311 
            52.1930466 52.2083626 52.2226791 52.2359962 52.2483063 52.2596169 52.2699242 
            52.2792282 52.2875252 52.2948189 52.3011093 52.3063927 52.3106689 52.3139381 
            52.3162041 52.3174629 52.3177147 52.3169594 52.315197 52.3124313 52.3086548 
            52.303875 52.2980919 52.2912979 52.2835045 52.2747002 52.2648964 52.2540894 
            52.2422752 52.2294617 52.2156487 52.2008324 52.1850128 52.1681976 52.150383 
            52.1315727 52.111763 52.0909615 52.0691643 52.0463753 52.0225945 51.9978218 
            51.9720612 51.9453125 51.9175758 51.8888588 51.8591537 51.8284721 51.7968063 
            51.764164 51.730545 51.6959534 51.6603889 51.6238518 51.5863457 51.5478706 
            51.5084343 51.4680328 51.4266739 51.3843536 51.3410759 51.2968483 51.251667 
            51.2055359 51.1584587 51.1104355 51.06147 51.01157 50.9607277 50.9089546 
            50.8797951 50.9359589 50.9911957 51.0455055 51.0988846 51.1513329 51.2028427 
            51.2534142 51.3030434 51.3517265 51.3994637 51.4462547 51.4920921 51.5369759 
            51.5809021 51.6238708 51.6658745 51.7069206 51.7469978 51.7861099 51.8242493 
            51.8614197 51.8976173 51.9328346 51.9670792 52.0003433 52.0326233 52.0639229 
            52.0942383 52.1235657 52.1519089 52.1792603 52.2056198 52.2309875 52.2553635 
            52.2787437 52.3011284 52.3225136 52.3429031 52.3622894 52.3806763 52.3980598 
            52.414444 52.429821 52.4441986 52.4575653 52.4699287 52.4812851 52.4916344 
            52.5009727 52.5093079 52.5166283 52.5229454 52.5282478 52.5325432 52.5358276 
            52.5381012 52.5393639 52.5396156 52.5388565 52.5370903 52.5343094 52.5305214 
            52.5257225 52.5199127 52.5130959 52.5052681 52.4964294 52.4865837 52.4757309 
            52.4638748 52.4510078 52.4371338 52.4222603 52.4063797 52.3894958 52.3716087 
            52.3527222 52.3328323 52.3119469 52.290062 52.2671776 52.2433014 52.2184296 
            52.1925659 52.1657066 52.1378593 52.1090279 52.0792046 52.0483971 52.0166054 
            51.9838333 51.9500809 51.9153481 51.8796387 51.8429565 51.8053017 51.766674 
            51.7270813 51.6865196 51.6449928 51.6025047 51.5590591 51.5146523 51.4692917 
            51.4229774 51.3757133 51.3275032 51.2783432 51.2282448 51.1772041 51.1252251 
            51.0949669 51.1513519 51.2068062 51.2613297 51.3149185 51.3675728 51.4192848 
            51.4700546 51.5198784 51.5687561 51.616684 51.6636581 51.7096748 51.7547379 
            51.7988396 51.8419762 51.8841515 51.9253578 51.9655991 52.0048637 52.0431595 
            52.0804749 52.1168175 52.1521797 52.1865578 52.2199554 52.2523651 52.2837906 
            52.3142281 52.3436775 52.3721313 52.3995934 52.4260597 52.4515305 52.4760056 
            52.4994774 52.5219536 52.5434265 52.5638962 52.5833626 52.6018219 52.619278 
            52.6357269 52.6511688 52.6655998 52.6790237 52.6914368 52.7028389 52.7132301 
            52.7226105 52.7309761 52.738327 52.7446671 52.7499924 52.7543068 52.7576027 
            52.7598877 52.7611542 52.7614098 52.7606468 52.758873 52.7560806 52.7522774 
            52.7474594 52.7416267 52.7347794 52.7269173 52.7180481 52.7081604 52.6972656 
            52.6853561 52.6724396 52.6585121 52.6435738 52.6276283 52.6106758 52.5927162 
            52.5737534 52.5537872 52.532814 52.5108414 52.4878654 52.4638901 52.4389191 
            52.4129486 52.3859863 52.3580284 52.3290749 52.2991333 52.2682037 52.2362823 
            52.2033806 52.1694908 52.1346207 52.0987701 52.0619392 52.0241318 51.9853516 
            51.9455986 51.9048767 51.8631859 51.8205299 51.7769089 51.7323265 51.6867867 
            51.6402893 51.5928383 51.5444374 51.4950829 51.4447861 51.3935432 51.341362 
            51.3099976 51.3666 51.4222717 51.4770088 51.5308113 51.5836678 51.6355858 
            51.6865578 51.7365761 51.7856483 51.8337631 51.8809242 51.9271278 51.9723663 
            52.0166435 52.0599556 52.1022949 52.1436691 52.1840668 52.2234917 52.2619362 
            52.2994041 52.3358917 52.3713951 52.4059105 52.4394417 52.4719849 52.5035362 
            52.5340958 52.5636635 52.5922318 52.6198044 52.6463776 52.6719513 52.6965256 
            52.7200928 52.7426567 52.7642174 52.784771 52.8043175 52.8228531 52.8403778 
            52.8568954 52.8723984 52.8868904 52.9003677 52.9128304 52.9242783 52.9347115 
            52.9441299 52.9525299 52.9599113 52.9662781 52.9716263 52.975956 52.9792671 
            52.9815598 52.98283 52.9830856 52.9823227 52.9805374 52.9777374 52.9739189 
            52.9690781 52.9632225 52.9563484 52.9484558 52.9395485 52.9296227 52.9186821 
            52.9067268 52.8937569 52.8797722 52.8647728 52.8487625 52.8317413 52.8137093 
            52.7946701 52.7746201 52.7535629 52.7315025 52.7084351 52.6843643 52.6592903 
            52.6332169 52.606144 52.5780716 52.5490036 52.51894 52.4878845 52.4558372 
            52.422802 52.3887749 52.3537674 52.3177719 52.2807922 52.242836 52.2038994 
            52.16399 52.1231041 52.0812454 52.0384216 51.9946251 51.9498672 51.9041443 
            51.8574638 51.8098259 51.7612305 51.7116852 51.66119 51.609745 51.5573578 
            51.5248756 51.5817032 51.6375923 51.6925468 51.7465553 51.7996254 51.8517456 
            51.902916 51.9531364 52.0023994 52.0507088 52.098053 52.1444397 52.1898575 
            52.2343102 52.2777939 52.3203049 52.3618431 52.402401 52.4419823 52.4805832 
            52.5182037 52.5548363 52.5904808 52.6251373 52.658802 52.6914749 52.723156 
            52.7538376 52.7835197 52.8122063 52.8398895 52.8665733 52.8922501 52.9169197 
            52.9405861 52.9632416 52.98489 53.0055237 53.0251503 53.0437622 53.0613594 
            53.0779419 53.0935097 53.1080589 53.1215897 53.1341057 53.1455994 53.1560745 
            53.1655312 53.1739655 53.1813774 53.1877708 53.1931381 53.1974869 53.2008095 
            53.2031097 53.2043915 53.2046471 53.2038803 53.2020874 53.199276 53.1954384 
            53.1905823 53.1847 53.1777992 53.1698761 53.1609306 53.1509666 53.1399803 
            53.1279755 53.1149521 53.1009102 53.0858498 53.0697784 53.0526848 53.0345802 
            53.0154648 52.9953346 52.9741898 52.9520378 52.9288788 52.9047089 52.8795357 
            52.8533554 52.8261719 52.7979889 52.7688026 52.7386208 52.7074394 52.6752625 
            52.6420937 52.607933 52.5727806 52.5366402 52.4995155 52.4614067 52.4223175 
            52.3822441 52.341198 52.2991714 52.256176 52.2122078 52.1672707 52.1213684 
            52.074501 52.0266724 51.9778862 51.9281464 51.877449 51.8258018 51.7732086 
            51.7396049 51.7966499 51.8527603 51.9079285 51.9621544 52.0154305 52.0677567 
            52.1191292 52.169548 52.2190056 52.2675056 52.3150406 52.3616104 52.4072113 
            52.4518394 52.4954948 52.5381775 52.5798798 52.6206017 52.6603394 52.6990967 
            52.736866 52.7736435 52.809433 52.8442268 52.8780289 52.9108353 52.9426422 
            52.9734459 53.0032501 53.0320511 53.0598488 53.0866356 53.1124191 53.137188 
            53.1609497 53.1836967 53.2054329 53.2261543 53.2458572 53.2645454 53.2822113 
            53.2988625 53.3144951 53.3291016 53.3426895 53.3552551 53.3667984 53.3773155 
            53.3868103 53.3952789 53.4027214 53.4091377 53.4145279 53.4188957 53.4222336 
            53.4245453 53.425827 53.4260826 53.425312 53.4235153 53.4206924 53.4168396 
            53.4119606 53.4060593 53.399128 53.3911705 53.3821907 53.3721848 53.3611526 
            53.349102 53.3360252 53.3219261 53.3068047 53.2906647 53.2735062 53.2553291 
            53.2361336 53.2159195 53.1946907 53.172451 53.1491966 53.1249313 53.0996513 
            53.0733681 53.0460739 53.0177765 52.9884758 52.958168 52.9268608 52.894558 
            52.8612518 52.8269539 52.7916603 52.7553787 52.7181053 52.6798401 52.6405945 
            52.6003647 52.5591507 52.5169601 52.4737892 52.4296455 52.3845329 52.3384476 
            52.2913933 52.2433777 52.194397 52.1444588 52.0935631 52.0417137 51.9889107 
            51.954174 52.0114441 52.0677757 52.1231613 52.177597 52.2310829 52.2836151 
            52.3351936 52.3858109 52.4354668 52.4841576 52.5318794 52.5786324 52.6244164 
            52.6692238 52.7130547 52.7559052 52.7977715 52.8386574 52.8785553 52.917469 
            52.9553871 52.9923134 53.0282478 53.0631828 53.0971184 53.1300583 53.1619911 
            53.1929207 53.222847 53.2517624 53.2796707 53.3065681 53.3324547 53.3573265 
            53.3811836 53.4040222 53.4258461 53.4466515 53.4664345 53.485199 53.5029411 
            53.5196571 53.5353508 53.5500183 53.5636635 53.5762787 53.5878677 53.5984268 
            53.6079597 53.6164627 53.6239395 53.6303825 53.6357956 53.6401787 53.643528 
            53.6458511 53.6471405 53.6473961 53.6466217 53.6448174 53.641983 53.6381149 
            53.6332169 53.6272888 53.6203308 53.6123428 53.6033249 53.593277 53.5822029 
            53.5700989 53.5569687 53.5428123 53.5276337 53.511425 53.4941978 53.4759445 
            53.4566689 53.4363747 53.415062 53.3927307 53.369381 53.3450165 53.3196373 
            53.2932472 53.2658424 53.2374306 53.2080078 53.1775818 53.1461487 53.1137123 
            53.0802765 53.0458412 53.0104065 52.9739761 52.9365501 52.8981361 52.8587303 
            52.8183403 52.7769623 52.7346001 52.6912613 52.6469421 52.6016464 52.555378 
            52.5081406 52.4599304 52.410759 52.3606224 52.3095245 52.2574692 52.2044601 
            52.1685829 52.226078 52.2826309 52.3382339 52.3928833 52.4465828 52.499321 
            52.5511017 52.6019173 52.6517715 52.7006531 52.7485695 52.7955093 52.8414726 
            52.8864594 52.9304619 52.973484 53.015522 53.0565681 53.0966301 53.1356964 
            53.1737671 53.2108421 53.2469177 53.2819939 53.3160706 53.3491402 53.3812027 
            53.4122581 53.4423027 53.4713364 53.4993591 53.5263634 53.5523567 53.5773277 
            53.6012802 53.6242142 53.6461258 53.6670151 53.686882 53.705719 53.7235336 
            53.7403183 53.7560768 53.7708054 53.7845039 53.7971725 53.8088074 53.8194122 
            53.8289833 53.8375206 53.8450241 53.8514938 53.8569298 53.8613319 53.8646965 
            53.8670273 53.8683205 53.8685799 53.8678017 53.8659897 53.8631439 53.8592606 
            53.8543434 53.8483887 53.841404 53.8333817 53.8243256 53.8142395 53.8031197 
            53.790966 53.7777824 53.7635689 53.7483253 53.7320557 53.714756 53.6964264 
            53.6770744 53.6567001 53.6352997 53.6128769 53.5894318 53.5649681 53.5394859 
            53.512989 53.4854736 53.4569473 53.4274063 53.3968544 53.3652954 53.3327293 
            53.29916 53.2645836 53.2290039 53.1924286 53.1548538 53.1162872 53.076725 
            53.036171 52.9946251 52.9520988 52.9085846 52.8640862 52.8186111 52.7721596 
            52.7247314 52.6763344 52.6269646 52.5766296 52.5253296 52.4730721 52.4198532 
            52.3828239 52.4405479 52.4973221 52.5531425 52.6080093 52.6619186 52.7148666 
            52.7668495 52.8178711 52.8679199 52.916996 52.9650993 53.0122261 53.0583763 
            53.1035385 53.1477203 53.1909142 53.23312 53.274334 53.3145523 53.353775 
            53.3919983 53.4292221 53.4654465 53.5006638 53.534874 53.5680771 53.6002693 
            53.6314507 53.6616173 53.6907692 53.7189064 53.7460213 53.7721176 53.7971916 
            53.8212433 53.8442688 53.8662682 53.8872414 53.9071884 53.9261055 53.9439888 
            53.9608459 53.9766655 53.9914551 54.0052109 54.0179291 54.0296135 54.0402603 
            54.0498695 54.058445 54.065979 54.0724754 54.0779343 54.0823517 54.0857315 
            54.0880699 54.0893707 54.0896301 54.0888481 54.0870285 54.0841713 54.0802727 
            54.0753326 54.069355 54.0623398 54.054287 54.0451965 54.0350647 54.0238991 
            54.0116997 53.9984627 53.9841919 53.9688835 53.9525452 53.9351768 53.9167747 
            53.8973427 53.8768845 53.8553963 53.8328819 53.8093452 53.7847824 53.7591972 
            53.7325897 53.7049637 53.6763229 53.6466637 53.6159897 53.584301 53.5516014 
            53.5178947 53.483181 53.4474602 53.4107361 53.3730125 53.3342857 53.2945671 
            53.253849 53.2121391 53.1694412 53.1257553 53.0810814 53.0354233 52.9887848 
            52.9411697 52.8925781 52.8430138 52.7924805 52.7409782 52.6885109 52.6350822 
            52.5968971 52.6548462 52.7118454 52.7678833 52.8229675 52.8770905 52.9302483 
            52.9824371 53.0336571 53.0839081 53.1331787 53.1814728 53.2287903 53.2751198 
            53.3204651 53.3648224 53.4081879 53.4505615 53.4919395 53.5323219 53.571701 
            53.6100807 53.6474533 53.6838226 53.7191811 53.7535324 53.786869 53.819191 
            53.8504982 53.8807869 53.9100571 53.9383049 53.9655342 53.9917336 54.0169106 
            54.0410576 54.0641785 54.0862694 54.1073303 54.1273537 54.146347 54.1643066 
            54.1812325 54.1971169 54.2119675 54.2257767 54.2385483 54.2502785 54.2609711 
            54.2706223 54.2792282 54.2867928 54.2933159 54.2987976 54.3032341 54.3066254 
            54.3089752 54.3102798 54.3105431 54.3097572 54.30793 54.3050613 54.3011475 
            54.2961884 54.2901878 54.2831421 54.2750549 54.2659264 54.2557564 54.244545 
            54.2322922 54.2190018 54.20467 54.1893044 54.1728973 54.1554565 54.136982 
            54.1174698 54.0969276 54.0753517 54.0527458 54.0291138 54.0044518 53.9787598 
            53.9520493 53.9243088 53.8955498 53.8657722 53.8349724 53.8031578 53.7703285 
            53.7364845 53.7016296 53.6657639 53.6288948 53.5910149 53.5521355 53.5122566 
            53.4713745 53.4295006 53.386631 53.3427658 53.2979164 53.252079 53.2052536 
            53.1574478 53.1086655 53.0589027 53.0081711 52.9564629 52.9037895 52.8501472 
            52.8107986 52.8689728 52.9261932 52.9824562 53.0377579 53.0920906 53.1454582 
            53.1978569 53.249279 53.2997284 53.3491974 53.397686 53.4451866 53.491703 
            53.5372314 53.5817642 53.6253052 53.6678467 53.7093925 53.7499352 53.7894745 
            53.8280067 53.8655319 53.9020462 53.9375496 53.9720383 54.0055084 54.0379601 
            54.069397 54.0998077 54.1291962 54.1575584 54.1848946 54.2112045 54.2364807 
            54.2607307 54.2839432 54.3061256 54.3272705 54.3473778 54.3664474 54.3844795 
            54.401474 54.4174232 54.4323349 54.4462013 54.4590263 54.4708061 54.4815407 
            54.49123 54.4998703 54.5074692 54.514019 54.5195198 54.5239754 54.5273819 
            54.5297394 54.5310516 54.5313148 54.5305252 54.5286942 54.5258102 54.5218773 
            54.5168991 54.5108757 54.5037994 54.4956818 54.486515 54.4763031 54.4650459 
            54.4527435 54.4393997 54.4250107 54.4095802 54.3931084 54.3755951 54.3570442 
            54.3374519 54.3168259 54.2951622 54.2724648 54.2487335 54.2239723 54.1981773 
            54.1713562 54.1435051 54.1146317 54.0847282 54.0538063 54.021862 53.9888992 
            53.9549179 53.9199257 53.8839149 53.8468933 53.8088646 53.7698288 53.7297897 
            53.6887436 53.6467018 53.6036606 53.5596199 53.5145912 53.4685669 53.4215584 
            53.3735619 53.324585 53.2746277 53.22369 53.1717796 53.1188965 53.0650444 
            53.0245209 53.0829239 53.1403694 53.1968536 53.2523727 53.3069229 53.3605003 
            53.413105 53.4647331 53.5153809 53.5650482 53.6137276 53.6614189 53.7081223 
            53.75383 53.798542 53.8422585 53.8849716 53.9266815 53.9673882 54.0070839 
            54.0457726 54.0834503 54.1201096 54.1557579 54.1903839 54.2239914 54.2565765 
            54.2881393 54.3186722 54.3481827 54.3766594 54.4041061 54.4305229 54.4559021 
            54.4802513 54.5035591 54.5258293 54.5470619 54.5672531 54.5863991 54.6045074 
            54.6215668 54.6375847 54.6525536 54.6664772 54.6793556 54.6911812 54.7019615 
            54.711689 54.7203674 54.7279968 54.7345734 54.740097 54.7445717 54.7479935 
            54.7503624 54.7516785 54.7519417 54.751152 54.7493095 54.7464142 54.742466 
            54.7374687 54.7314186 54.7243156 54.7161598 54.7069588 54.6967049 54.6854019 
            54.6730461 54.6596489 54.6451988 54.6297073 54.6131668 54.5955849 54.5769577 
            54.5572853 54.5365753 54.5148239 54.4920349 54.4682045 54.4433441 54.4174423 
            54.3905106 54.3625488 54.3335571 54.3035355 54.2724838 54.2404137 54.2073174 
            54.1731987 54.1380615 54.1019058 54.0647392 54.0265541 53.9873619 53.9471588 
            53.9059525 53.863739 53.8205261 53.77631 53.7310982 53.6848946 53.6376953 
            53.5895119 53.5403366 53.490181 53.4390411 53.3869247 53.3338318 53.2797699 
            53.23806 53.2966919 53.3543663 53.4110718 53.4668083 53.5215759 53.575367 
            53.6281776 53.6800117 53.7308617 53.7807236 53.8295975 53.8774796 53.9243698 
            53.9702606 54.015152 54.0590401 54.1019287 54.1438065 54.1846733 54.2245331 
            54.2633781 54.3012047 54.3380165 54.373806 54.4085732 54.4423141 54.4750328 
            54.5067215 54.5373802 54.567009 54.5956039 54.6231613 54.6496849 54.6751709 
            54.6996155 54.7230186 54.7453804 54.7667007 54.786972 54.8061981 54.824379 
            54.8415108 54.8575935 54.8726234 54.8866043 54.8995361 54.9114113 54.9222336 
            54.932003 54.9407158 54.9483757 54.9549789 54.9605293 54.9650192 54.9684525 
            54.9708328 54.9721527 54.9724197 54.9716263 54.9697762 54.9668694 54.9629059 
            54.9578857 54.9518089 54.9446793 54.9364929 54.9272499 54.916954 54.9056053 
            54.8932037 54.8797455 54.865242 54.8496819 54.8330765 54.8154221 54.7967148 
            54.7769661 54.7561722 54.7343292 54.7114487 54.6875229 54.6625557 54.6365547 
            54.6095123 54.5814362 54.5523224 54.5221786 54.4910049 54.4588013 54.4255714 
            54.3913155 54.3560371 54.3197365 54.2824173 54.2440834 54.204731 54.1643677 
            54.1229935 54.0806084 54.0372238 53.9928322 53.9474373 53.9010506 53.8536644 
            53.8052864 53.7559166 53.7055588 53.6542168 53.6018944 53.5485916 53.4943123 
            53.4514122 53.5102768 53.5681763 53.6251068 53.6810646 53.7360458 53.7900505 
            53.843071 53.8951111 53.9461632 53.9962234 54.0452919 54.0933685 54.1404419 
            54.1865158 54.2315903 54.2756538 54.3187141 54.3607597 54.4017944 54.4418106 
            54.4808121 54.518795 54.5557518 54.5916862 54.6265945 54.6604767 54.693325 
            54.7251434 54.755928 54.785675 54.8143845 54.8420563 54.8686905 54.8942757 
            54.9188232 54.9423218 54.9647751 54.9861794 55.0065384 55.0258408 55.0440979 
            55.0612984 55.077446 55.0925407 55.1065788 55.1195602 55.131485 55.1423531 
            55.1521606 55.1609116 55.168602 55.1752357 55.1808052 55.1853142 55.1887627 
            55.1911507 55.1924782 55.1927414 55.1919479 55.1900902 55.1871719 55.1831932 
            55.1781502 55.1720505 55.1648903 55.1566696 55.1473885 55.1370506 55.1256561 
            55.1132011 55.0996933 55.085125 55.0695038 55.0528297 55.0351028 55.0163193 
            54.9964905 54.9756088 54.9536781 54.9307022 54.9066811 54.8816147 54.8555031 
            54.8283539 54.8001595 54.7709312 54.7406654 54.709362 54.6770287 54.6436653 
            54.6092682 54.5738487 54.5373993 54.4999313 54.461441 54.4219284 54.3814049 
            54.3398628 54.2973099 54.2537498 54.2091789 54.1636047 54.1170311 54.0694542 
            54.0208817 53.9713173 53.9207611 53.8692131 53.8166847 53.7631683 53.7086754 
            53.6645737 53.723671 53.7817955 53.8389511 53.8951302 53.9503288 54.0045471 
            54.0577812 54.1100273 54.1612816 54.211544 54.260807 54.3090744 54.3563385 
            54.4025993 54.4478493 54.4920921 54.5353241 54.5775414 54.6187401 54.6589203 
            54.6980782 54.7362137 54.7733192 54.8093987 54.8444519 54.8784676 54.9114494 
            54.9433975 54.974308 55.0041771 55.0330048 55.0607872 55.0875282 55.1132202 
            55.137867 55.1614647 55.1840096 55.2055016 55.2259407 55.245327 55.2636528 
            55.2809258 55.297142 55.3122978 55.3263931 55.3394279 55.3514023 55.3623161 
            55.3721657 55.3809509 55.3886719 55.3953323 55.4009247 55.4054527 55.4089165 
            55.4113121 55.4126472 55.4129105 55.4121132 55.4102478 55.4073181 55.4033203 
            55.398262 55.3921356 55.3849449 55.3766899 55.3673706 55.3569908 55.3455467 
            55.3330421 55.3194771 55.3048515 55.2891655 55.2724228 55.2546234 55.2357635 
            55.2158508 55.1948853 55.1728668 55.1497955 55.1256752 55.1005058 55.0742912 
            55.0470276 55.0187225 54.9893723 54.9589844 54.9275551 54.8950882 54.8615875 
            54.8270531 54.7914886 54.7548943 54.7172737 54.678627 54.638958 54.5982666 
            54.5565605 54.5138359 54.4700966 54.4253502 54.3795929 54.3328323 54.2850647 
            54.2363014 54.1865387 54.1357803 54.0840263 54.0312881 53.977562 53.9228516 
            53.8775406 53.9368668 53.995224 54.0526047 54.109005 54.1644249 54.2188568 
            54.2723045 54.3247566 54.3762169 54.4266777 54.4761391 54.5245972 54.572052 
            54.6184959 54.663929 54.7083511 54.7517548 54.7941437 54.8355064 54.8758507 
            54.9151649 54.9534569 54.990715 55.0269394 55.0621338 55.0962868 55.129406 
            55.1614838 55.1925163 55.2225075 55.2514534 55.2793541 55.3062019 55.3320007 
            55.3567467 55.3804398 55.4030762 55.4246559 55.445179 55.4646454 55.4830475 
            55.5003929 55.516674 55.5318909 55.5460434 55.5591354 55.5711594 55.5821152 
            55.5920029 55.6008263 55.6085815 55.6152649 55.6208839 55.6254311 55.6289062 
            55.6313171 55.6326523 55.6329193 55.6321182 55.6302452 55.6273041 55.623291 
            55.6182098 55.6120567 55.6048393 55.59655 55.5871925 55.5767708 55.5652809 
            55.5527229 55.5391006 55.5244141 55.508667 55.4918518 55.4739799 55.4550438 
            55.435051 55.4139977 55.3918877 55.3687248 55.3445053 55.3192329 55.2929077 
            55.2655334 55.237114 55.2076454 55.1771317 55.1455727 55.1129761 55.0793419 
            55.0446663 55.0089569 54.9722137 54.9344406 54.8956375 54.8558083 54.8149529 
            54.7730751 54.7301826 54.6862679 54.6413383 54.5954018 54.5484505 54.5004959 
            54.4515343 54.4015732 54.3506126 54.2986526 54.2457047 54.1917648 54.1368408 
            54.0903053 54.149868 54.2084579 54.2660637 54.3226891 54.3783264 54.4329758 
            54.4866333 54.5392952 54.5909576 54.6416245 54.6912804 54.7399368 54.7875786 
            54.8342094 54.8798256 54.924427 54.9680061 55.0105629 55.0520935 55.0926018 
            55.1320763 55.1705208 55.2079277 55.2443047 55.2796364 55.3139343 55.3471832 
            55.3793945 55.410553 55.4406662 55.4697304 55.4977417 55.524704 55.5506058 
            55.5754547 55.5992432 55.6219749 55.6436424 55.6642494 55.6837959 55.7022743 
            55.7196884 55.7360382 55.7513199 55.7655296 55.7786751 55.7907486 55.8017502 
            55.8116798 55.8205376 55.8283234 55.8350372 55.8406792 55.8452454 55.8487358 
            55.8511543 55.8524971 55.8527641 55.8519592 55.8500786 55.8471222 55.8430939 
            55.8379936 55.8318138 55.8245659 55.8162422 55.8068504 55.7963829 55.7848434 
            55.7722359 55.7585602 55.7438126 55.7279968 55.7111168 55.6931686 55.6741562 
            55.6540794 55.6329422 55.6107407 55.5874825 55.5631638 55.5377846 55.5113564 
            55.4838676 55.4553299 55.4257431 55.3951035 55.3634186 55.3306885 55.296917 
            55.2621002 55.2262459 55.1893539 55.1514282 55.1124687 55.0724754 55.031456 
            54.9894104 54.9463425 54.9022522 54.8571434 54.8110199 54.7638817 54.7157364 
            54.6665764 54.6164169 54.5652504 54.5130882 54.4599304 54.4057732 54.3506317 
            54.3028679 54.3626671 54.4214859 54.4793205 54.536171 54.5920296 54.6468964 
            54.7007675 54.7536392 54.8055077 54.8563728 54.9062309 54.9550819 55.0029144 
            55.0497322 55.0955353 55.1403122 55.1840668 55.2267952 55.2684975 55.309166 
            55.3488007 55.3874016 55.4249649 55.461483 55.4969635 55.5313988 55.564785 
            55.597126 55.6284142 55.6586494 55.6878319 55.7159576 55.7430267 55.7690392 
            55.7939873 55.8178749 55.8406982 55.8624573 55.8831482 55.9027748 55.9213295 
            55.9388161 55.9552307 55.9705772 55.984848 55.9980431 56.0101662 56.0212135 
            56.0311852 56.040081 56.0479012 56.0546417 56.0603027 56.064888 56.0683937 
            56.0708237 56.0721703 56.0724411 56.0716324 56.0697441 56.0667763 56.0627327 
            56.0576057 56.051403 56.0441246 56.0357666 56.0263329 56.0158234 56.0042381 
            55.991581 55.9778442 55.9630394 55.9471588 55.9302063 55.9121857 55.8930931 
            55.8729362 55.8517113 55.8294182 55.8060646 55.7816467 55.7561646 55.7296257 
            55.7020264 55.6733742 55.6436615 55.6128998 55.5810852 55.5482216 55.5143127 
            55.4793549 55.4433556 55.406311 55.3682327 55.329113 55.2889595 55.247776 
            55.2055626 55.1623192 55.1180496 55.0727615 55.0264511 54.979126 54.9307823 
            54.8814278 54.8310661 54.7796974 54.7273254 54.673954 54.6195869 54.5642242 
            54.5152245 54.5752602 54.6343079 54.6923752 54.7494469 54.8055267 54.8606148 
            54.9146996 54.9677811 55.0198593 55.0709267 55.1209869 55.1700287 55.2180557 
            55.2650642 55.3110466 55.3560066 55.3999405 55.4428406 55.4847107 55.5255432 
            55.5653381 55.6040955 55.6418114 55.6784782 55.7141037 55.7486763 55.7822037 
            55.8146744 55.8460884 55.8764496 55.9057503 55.9339943 55.961174 55.9872894 
            56.0123444 56.0363274 56.0592461 56.0810928 56.1018715 56.1215782 56.1402092 
            56.1577682 56.1742516 56.1896591 56.2039871 56.2172394 56.2294121 56.2405052 
            56.2505188 56.2594528 56.2673035 56.2740707 56.2797585 56.2843628 56.2878799 
            56.2903175 56.2916718 56.2919426 56.2911301 56.2892342 56.2862549 56.282196 
            56.27705 56.2708206 56.2635117 56.2551193 56.2456474 56.235096 56.2234612 
            56.2107506 56.1969566 56.1820908 56.1661453 56.1491241 56.1310272 56.1118584 
            56.0916176 56.0703049 56.0479202 56.0244675 55.9999504 55.9743652 55.9477158 
            55.9200058 55.8912354 55.8614006 55.830513 55.7985687 55.7655716 55.7315216 
            55.6964226 55.6602745 55.623085 55.5848465 55.5455704 55.5052567 55.4639053 
            55.4215202 55.3781013 55.3336563 55.2881851 55.2416878 55.1941719 55.1456337 
            55.0960846 55.0455208 54.9939461 54.9413643 54.8877792 54.8331947 54.7776108 
            54.7273674 54.7876396 54.8469238 54.9052162 54.9625168 55.0188217 55.0741234 
            55.1284256 55.1817207 55.234005 55.2852783 55.335537 55.3847771 55.4329987 
            55.4801941 55.5263634 55.5715065 55.6156158 55.6586914 55.7007294 55.7417297 
            55.7816849 55.8205986 55.8584671 55.8952866 55.9310532 55.9657707 55.9994316 
            56.0320358 56.0635796 56.0940666 56.1234856 56.151844 56.1791382 56.2053604 
            56.2305145 56.2546005 56.2776108 56.2995491 56.3204117 56.3401985 56.3589096 
            56.3765411 56.3930931 56.4085617 56.4229507 56.4362564 56.4484825 56.4596214 
            56.469677 56.4786453 56.4865265 56.4933243 56.4990349 56.5036583 56.5071907 
            56.5096397 56.5110016 56.5112724 56.5104561 56.5085526 56.5055618 56.5014801 
            56.496315 56.4900627 56.4827232 56.4742966 56.4647827 56.4541855 56.4425049 
            56.4297409 56.4158936 56.4009628 56.3849525 56.3678589 56.3496895 56.3304405 
            56.3101158 56.2887154 56.2662392 56.242691 56.218071 56.1923828 56.1656227 
            56.1377983 56.1089096 56.0789566 56.0479393 56.0158653 55.9827347 55.9485435 
            55.9133034 55.8770065 55.8396645 55.8012733 55.761837 55.7213593 55.6798401 
            55.6372833 55.593689 55.5490646 55.5034065 55.4567261 55.4090157 55.3602867 
            55.3105354 55.2597694 55.2079887 55.155201 55.1014023 55.0465965 54.9907951 
            54.9392929 54.9998016 55.0593224 55.1178474 55.1753731 55.2319031 55.287426 
            55.3419418 55.3954506 55.4479446 55.499424 55.5498848 55.5993233 55.6477394 
            55.6951256 55.7414818 55.7868042 55.8310928 55.8743401 55.9165497 55.9577141 
            55.9978371 56.0369072 56.0749283 56.1119003 56.1478119 56.1826706 56.2164688 
            56.2492065 56.28088 56.3114891 56.3410339 56.3695068 56.3969116 56.4232445 
            56.4485016 56.4726868 56.4957924 56.5178223 56.5387688 56.5586395 56.5774269 
            56.5951309 56.6117477 56.627285 56.6417313 56.6550941 56.6673698 56.6785545 
            56.6886482 56.6976547 56.705574 56.7123985 56.718132 56.7227745 56.7263222 
            56.7287827 56.7301483 56.7304192 56.729599 56.7276878 56.7246857 56.7205887 
            56.7154007 56.7091217 56.7017517 56.6932907 56.6837387 56.6730957 56.6613693 
            56.6485481 56.6346436 56.6196518 56.6035767 56.5864143 56.5681686 56.5488396 
            56.5284309 56.5069427 56.484375 56.4607277 56.4360085 56.4102135 56.3833427 
            56.3554039 56.3263969 56.2963181 56.2651787 56.2329712 56.1997032 56.1653748 
            56.1299896 56.093544 56.0560493 56.0175018 55.9779053 55.9372635 55.8955765 
            55.8528442 55.8090782 55.7642708 55.7184296 55.6715584 55.6236572 55.5747337 
            55.5247841 55.4738121 55.4218254 55.368824 55.3148117 55.2597885 55.2037621 
            55.1509972 55.2117462 55.2714996 55.3302574 55.3880157 55.444767 55.5005112 
            55.5552483 55.6089706 55.6616745 55.7133598 55.7640228 55.8136597 55.8622704 
            55.9098473 55.9563904 56.0018959 56.0463638 56.0897903 56.1321678 56.1735001 
            56.2137833 56.2530174 56.2911949 56.3283119 56.3643761 56.3993759 56.4333115 
            56.4661827 56.4979858 56.5287247 56.5583878 56.5869789 56.6144943 56.640934 
            56.6662979 56.6905823 56.7137833 56.7359047 56.7569389 56.7768898 56.7957535 
            56.81353 56.8302193 56.8458176 56.8603287 56.873745 56.8860703 56.8973007 
            56.9074402 56.9164848 56.9244308 56.9312859 56.9370422 56.9417038 56.9452705 
            56.9477386 56.9491081 56.9493828 56.9485588 56.94664 56.9436226 56.9395103 
            56.9343033 56.9279976 56.9205933 56.9120979 56.9025078 56.8918228 56.880043 
            56.8671722 56.8532104 56.8381577 56.8220139 56.8047791 56.7864571 56.7670517 
            56.7465553 56.7249794 56.7023163 56.6785736 56.6537514 56.6278496 56.600872 
            56.5728188 56.5436897 56.5134888 56.4822197 56.4498825 56.4164772 56.3820076 
            56.3464775 56.3098869 56.2722359 56.233532 56.1937752 56.1529655 56.1111107 
            56.0682068 56.0242615 55.9792747 55.9332466 55.8861885 55.8380928 55.7889709 
            55.7388191 55.687645 55.6354485 55.5822372 55.5280075 55.4727669 55.4165154 
            55.3624763 55.4234657 55.4834557 55.5424461 55.6004333 55.6574135 55.7133789 
            55.7683334 55.8222694 55.8751869 55.9270821 55.9779472 56.0277824 56.0765877 
            56.1243591 56.1710892 56.2167816 56.2614288 56.3050308 56.34758 56.3890839 
            56.4295311 56.4689217 56.5072556 56.5445251 56.5807343 56.6158791 56.6499557 
            56.6829605 56.7148972 56.7457581 56.7755432 56.8042526 56.8318825 56.8584328 
            56.8838997 56.9082832 56.9315796 56.9537926 56.9749146 56.9949493 57.0138931 
            57.0317421 57.0485001 57.0641632 57.0787315 57.092205 57.1045837 57.11586 
            57.1260414 57.1351242 57.1431046 57.1499863 57.1557693 57.16045 57.1640282 
            57.1665077 57.1678848 57.1681595 57.1673317 57.1654053 57.1623764 57.1582451 
            57.1530151 57.1466827 57.1392517 57.1307182 57.1210899 57.1103592 57.0985298 
            57.0856056 57.0715866 57.056469 57.0402565 57.022953 57.0045547 56.9850693 
            56.964489 56.9428215 56.9200668 56.896225 56.8712997 56.8452911 56.818203 
            56.7900314 56.7607841 56.7304611 56.6990623 56.6665916 56.633049 56.5984383 
            56.5627632 56.5260239 56.4882202 56.4493561 56.4094391 56.3684654 56.3264351 
            56.2833595 56.2392349 56.1940651 56.1478539 56.100605 56.0523148 56.0029945 
            55.9526405 55.9012604 55.8488579 55.7954292 55.7409859 55.685524 55.6290474 
            55.5737228 55.6349564 55.6951828 55.7544098 55.8126259 55.8698349 55.9260254 
            55.9811974 56.0353508 56.0884819 56.140583 56.1916542 56.2416916 56.2906914 
            56.3386536 56.3855743 56.4314499 56.4762802 56.5200577 56.5627823 56.604454 
            56.6450653 56.6846199 56.7231064 56.7605324 56.7968903 56.8321762 56.866394 
            56.8995361 56.9316025 56.9625893 56.9925003 57.021328 57.0490723 57.0757294 
            57.1013031 57.1257858 57.1491814 57.1714859 57.1926956 57.2128105 57.2318344 
            57.2497597 57.2665863 57.2823143 57.2969437 57.3104744 57.3229027 57.3342247 
            57.3444481 57.353569 57.3615837 57.3684959 57.3742981 57.3790016 57.3825951 
            57.3850822 57.386467 57.3867416 57.3859138 57.383976 57.3809357 57.3767891 
            57.3715363 57.3651772 57.3577156 57.3491478 57.3394775 57.328701 57.3168259 
            57.3038483 57.2897682 57.2745895 57.2583084 57.2409325 57.2224579 57.2028885 
            57.1822281 57.1604691 57.137619 57.1136818 57.0886536 57.0625343 57.0353355 
            57.0070496 56.9776802 56.9472313 56.9157028 56.8830986 56.8494186 56.8146667 
            56.7788429 56.7419548 56.7039948 56.6649742 56.6248932 56.5837517 56.5415535 
            56.4983025 56.4539986 56.4086456 56.3622475 56.3148041 56.2663231 56.2168007 
            56.1662445 56.1146584 56.0620422 56.0084038 55.9537392 55.898056 55.8413582 
            55.7847366 55.8462105 55.9066811 55.9661407 56.0245895 56.0820236 56.138443 
            56.1938362 56.2482071 56.301548 56.3538589 56.4051361 56.4553757 56.5045738 
            56.5527306 56.5998421 56.6459045 56.6909142 56.7348709 56.777771 56.8196106 
            56.8603897 56.9001045 56.9387512 56.9763298 57.0128365 57.0482674 57.0826225 
            57.1159019 57.1481018 57.1792183 57.2092514 57.2381973 57.2660561 57.2928238 
            57.3185043 57.3430901 57.366581 57.3889771 57.4102745 57.4304733 57.4495735 
            57.4675751 57.4844742 57.500267 57.5149574 57.5285416 57.5410233 57.5523949 
            57.5626602 57.5718193 57.5798645 57.5868073 57.5926361 57.5973549 57.6009636 
            57.6034622 57.6048508 57.6051292 57.6042976 57.6023521 57.5993004 57.5951347 
            57.589859 57.5834732 57.5759811 57.567379 57.5576668 57.5468483 57.5349197 
            57.5218887 57.5077515 57.4925079 57.476162 57.4587135 57.4401627 57.4205132 
            57.3997612 57.3779144 57.3549728 57.3309326 57.3058014 57.2795753 57.2522621 
            57.2238579 57.1943703 57.1637955 57.1321373 57.0993996 57.0655785 57.0306854 
            56.9947166 56.9576721 56.9195595 56.8803787 56.8401337 56.7988243 56.7564545 
            56.7130241 56.668541 56.6230049 56.5764198 56.5287857 56.4801064 56.4303856 
            56.3796272 56.3278313 56.2750053 56.2211494 56.1662674 56.1103592 56.0534363 
            55.9955139 56.0572319 56.117939 56.177639 56.2363205 56.2939835 56.3506241 
            56.4062424 56.4608307 56.514389 56.5669098 56.6183929 56.6688347 56.718235 
            56.7665863 56.8138885 56.8601379 56.9053307 56.9494667 56.9925423 57.0345535 
            57.0754967 57.1153717 57.1541786 57.1919098 57.2285652 57.2641449 57.2986412 
            57.332058 57.3643875 57.3956337 57.4257889 57.4548569 57.48283 57.5097122 
            57.5354958 57.5601845 57.5837746 57.6062622 57.6276474 57.647934 57.6671143 
            57.6851883 57.7021561 57.7180176 57.732769 57.7464104 57.7589417 57.7703629 
            57.7806702 57.7898674 57.7979469 57.8049164 57.8107719 57.8155098 57.8191338 
            57.8216438 57.82304 57.8233185 57.8224831 57.8205299 57.8174629 57.8132782 
            57.8079834 57.8015709 57.7940445 57.785408 57.7756538 57.7647896 57.7528152 
            57.739727 57.7255325 57.7102242 57.6938095 57.6762886 57.6576614 57.637928 
            57.6170921 57.5951538 57.5721169 57.5479774 57.5227394 57.4964066 57.4689789 
            57.4404602 57.4108505 57.380146 57.3483582 57.3154869 57.2815285 57.2464905 
            57.2103729 57.1731796 57.1349106 57.0955696 57.0551567 57.0136795 56.971138 
            56.9275322 56.8828659 56.8371429 56.7903671 56.7425423 56.6936646 56.6437454 
            56.5927811 56.5407791 56.4877396 56.4336662 56.3785629 56.3224335 56.2652779 
            56.2060432 56.2680054 56.3289566 56.3888931 56.4478111 56.505703 56.5625725 
            56.618412 56.6732216 56.7269936 56.7797279 56.8314171 56.8820648 56.9316635 
            56.9802132 57.0277061 57.0741425 57.1195221 57.1638374 57.2070847 57.2492676 
            57.2903824 57.3304214 57.3693848 57.4072723 57.4440804 57.479805 57.5144463 
            57.5479965 57.5804634 57.6118355 57.6421165 57.6713066 57.6993942 57.726387 
            57.7522774 57.7770691 57.8007584 57.8233376 57.8448143 57.8651848 57.8844452 
            57.9025955 57.919632 57.9355583 57.9503746 57.9640732 57.9766579 57.9881248 
            57.9984741 58.0077095 58.0158272 58.0228233 58.0287018 58.0334625 58.0371017 
            58.0396233 58.0410233 58.0413017 58.0404625 58.0385017 58.0354233 58.0312233 
            58.0259018 58.0194626 58.0119057 58.003231 57.9934387 57.9825287 57.9705048 
            57.9573631 57.9431038 57.9277344 57.9112511 57.8936577 57.8749542 57.8551369 
            57.8342171 57.8121872 57.7890511 57.7648125 57.7394714 57.713028 57.6854858 
            57.6568489 57.6271133 57.5962868 57.5643654 57.5313568 57.497261 57.4620781 
            57.4258118 57.3884659 57.3500366 57.3105354 57.2699585 57.2283096 57.1855927 
            57.1418114 57.0969658 57.0510559 57.0040894 56.9560699 56.9069939 56.8568726 
            56.8057022 56.7534904 56.7002373 56.6459465 56.5906219 56.5342674 56.4768867 
            56.4163284 56.4785385 56.5397301 56.5999031 56.6590576 56.7171822 56.7742805 
            56.8303452 56.8853722 56.9393616 56.9923058 57.0442085 57.0950584 57.1448593 
            57.1936035 57.241291 57.2879181 57.3334808 57.3779793 57.4214058 57.4637604 
            57.505043 57.5452461 57.5843697 57.6224136 57.6593704 57.6952438 57.7300262 
            57.7637177 57.7963181 57.8278236 57.8582268 57.8875351 57.9157448 57.9428482 
            57.9688454 57.9937401 58.0175247 58.0402031 58.0617676 58.082222 58.1015625 
            58.1197891 58.136898 58.1528931 58.1677666 58.1815224 58.1941605 58.205677 
            58.2160721 58.2253456 58.2334938 58.2405205 58.2464256 58.2512054 58.2548599 
            58.2573891 58.2587967 58.259079 58.2582321 58.2562637 58.2531738 58.2489548 
            58.2436142 58.2371483 58.2295609 58.2208481 58.2110138 58.200058 58.1879807 
            58.1747856 58.1604691 58.1450348 58.1284828 58.110817 58.0920334 58.0721359 
            58.0511246 58.0290031 58.0057716 57.9814301 57.955986 57.9294319 57.9017792 
            57.8730202 57.8431625 57.8122063 57.7801552 57.7470093 57.7127724 57.6774445 
            57.6410294 57.6035271 57.5649414 57.52528 57.4845352 57.4427185 57.399826 
            57.3558617 57.310833 57.2647362 57.2175827 57.1693649 57.1200905 57.069767 
            57.0183907 56.9659653 56.9124985 56.8579865 56.8024406 56.7458611 56.6882477 
            56.626358 56.6888161 56.7502518 56.8106689 56.8700562 56.9284172 56.9857407 
            57.0420303 57.0972824 57.1514893 57.2046471 57.2567596 57.3078156 57.3578186 
            57.4067612 57.4546432 57.501461 57.5472069 57.5918846 57.6354904 57.6780205 
            57.719471 57.7598419 57.7991257 57.837326 57.8744354 57.9104576 57.945385 
            57.9792137 58.0119514 58.0435829 58.0741158 58.1035461 58.1318703 58.1590881 
            58.1851959 58.2101936 58.2340775 58.2568474 58.2785034 58.2990456 58.3184662 
            58.3367691 58.3539505 58.3700104 58.3849487 58.3987617 58.4114532 58.4230156 
            58.4334564 58.4427681 58.4509506 58.4580078 58.4639359 58.4687347 58.4724045 
            58.4749451 58.4763603 58.4766426 58.4757957 58.4738159 58.4707108 58.4664764 
            58.461113 58.4546204 58.4469986 58.4382515 58.4283752 58.4173737 58.4052467 
            58.3919945 58.3776207 58.3621216 58.3455009 58.3277588 58.3088951 58.2889137 
            58.2678185 58.2456017 58.2222748 58.197834 58.1722794 58.1456184 58.1178474 
            58.0889702 58.0589867 58.0279045 57.9957199 57.9624367 57.9280586 57.8925819 
            57.8560181 57.8183632 57.7796173 57.7397919 57.6988792 57.6568909 57.6138229 
            57.5696831 57.5244675 57.4781837 57.4308357 57.3824234 57.3329506 57.2824173 
            57.230835 57.1781998 57.1245155 57.0697861 57.0140152 56.9572067 56.8993645 
            56.836132 56.898838 56.9605217 57.0211754 57.0808029 57.1393967 57.1969528 
            57.2534676 57.3089409 57.363369 57.4167442 57.4690628 57.5203285 57.5705338 
            57.6196785 57.6677551 57.7147598 57.7606964 57.8055573 57.8493423 57.8920441 
            57.9336662 57.9742012 58.013649 58.0520058 58.0892715 58.1254387 58.160511 
            58.1944847 58.2273521 58.2591209 58.2897797 58.3193321 58.3477745 58.375103 
            58.4013214 58.4264221 58.4504089 58.4732742 58.4950218 58.5156479 58.5351486 
            58.5535278 58.5707817 58.5869102 58.6019096 58.6157837 58.6285248 58.6401367 
            58.6506195 58.6599731 58.66819 58.6752777 58.6812286 58.6860504 58.6897354 
            58.6922874 58.6937065 58.6939888 58.6931381 58.6911545 58.6880341 58.6837807 
            58.6783943 58.671875 58.6642227 58.6554375 58.6455193 58.6344719 58.6222954 
            58.6089859 58.5945511 58.5789871 58.562294 58.5444794 58.5255394 58.5054741 
            58.4842873 58.4619789 58.4385567 58.4140129 58.3883514 58.3615799 58.3336906 
            58.3046951 58.2745895 58.2433739 58.2110558 58.1776352 58.1431122 58.1074944 
            58.0707779 58.0329666 57.9940605 57.954071 57.9129906 57.8708305 57.8275833 
            57.7832603 57.7378616 57.691391 57.6438484 57.5952377 57.5455666 57.4948273 
            57.4430351 57.3901863 57.3362846 57.2813377 57.2253418 57.1683044 57.1102295 
            57.0456429 57.1086006 57.1705284 57.2314262 57.2912941 57.3501205 57.4079094 
            57.464653 57.5203514 57.5749969 57.6285858 57.6811218 57.7325935 57.7830048 
            57.8323479 57.880619 57.9278183 57.9739456 58.0189896 58.0629539 58.1058311 
            58.147625 58.1883278 58.2279358 58.2664528 58.3038712 58.3401909 58.3754082 
            58.4095192 58.4425278 58.4744263 58.5052109 58.5348892 58.5634499 58.5908928 
            58.617218 58.6424255 58.6665115 58.6894722 58.7113113 58.7320213 58.751606 
            58.7700653 58.7873917 58.8035851 58.8186493 58.8325806 58.8453751 58.8570404 
            58.8675652 58.8769569 58.8852081 58.8923264 58.898304 58.9031448 58.9068451 
            58.9094086 58.9108315 58.9111176 58.9102631 58.908268 58.9051361 58.9008675 
            58.8954582 58.8889084 58.8812256 58.8724022 58.8624458 58.8513489 58.839119 
            58.8257561 58.8112602 58.7956314 58.7788696 58.7609787 58.7419548 58.7218094 
            58.7005348 58.6781311 58.6546097 58.6299629 58.6041946 58.5773087 58.5493088 
            58.5201874 58.4899559 58.4586143 58.4261627 58.392601 58.3579369 58.3221703 
            58.2853012 58.2473335 58.2082672 58.1681137 58.1268654 58.0845299 58.0411072 
            57.9966011 57.9510155 57.9043541 57.856617 57.8078079 57.7579346 57.7069893 
            57.6549873 57.6019249 57.5478058 57.4926338 57.4364128 57.3791466 57.3208389 
            57.2548904 57.3180962 57.3802719 57.4414177 57.5015221 57.5605888 57.6186066 
            57.6755791 57.7315025 57.7863693 57.8401794 57.8929253 57.9446068 57.995224 
            58.0447693 58.0932388 58.1406326 58.1869431 58.2321739 58.2763176 58.3193741 
            58.3613396 58.4022102 58.4419823 58.4806595 58.5182304 58.5547028 58.590065 
            58.624321 58.6574631 58.6894951 58.7204094 58.7502098 58.7788887 58.8064499 
            58.8328857 58.8581963 58.8823853 58.9054413 58.927372 58.9481697 58.9678383 
            58.9863739 59.0037727 59.0200348 59.0351639 59.0491524 59.0620041 59.0737152 
            59.0842857 59.0937157 59.1020012 59.1091499 59.1151543 59.1200142 59.1237297 
            59.1263046 59.1277351 59.1280212 59.1271629 59.1251602 59.1220169 59.1177254 
            59.1122932 59.1057205 59.0980034 59.0891418 59.0791435 59.0680008 59.0557213 
            59.0423012 59.0277405 59.0120468 58.9952126 58.9772491 58.9581451 58.937912 
            58.9165497 58.8940544 58.8704338 58.8456841 58.819809 58.7928085 58.7646904 
            58.7354507 58.7050934 58.6736183 58.6410294 58.6073303 58.5725212 58.5366058 
            58.4995842 58.4614601 58.4222336 58.3819122 58.3404922 58.2979813 58.2543831 
            58.2096939 58.1639214 58.1170692 58.0691376 58.0201302 57.9700508 57.9188995 
            57.866684 57.8134079 57.7590675 57.7036743 57.6472244 57.5897293 57.5311852 
            57.4638634 57.5273247 57.5897484 57.6511383 57.7114868 57.7707863 57.8290443 
            57.8862457 57.9423943 57.9974823 58.0515099 58.1044731 58.1563644 58.2071877 
            58.2569351 58.305603 58.3531914 58.3996925 58.4451103 58.4894371 58.5326691 
            58.5748062 58.6158447 58.6557846 58.694622 58.7323494 58.7689705 58.8044815 
            58.8388786 58.8721619 58.9043274 58.9353714 58.9652939 58.9940948 59.0217705 
            59.048317 59.0737343 59.0980225 59.1211777 59.1431999 59.1640854 59.1838379 
            59.2024498 59.2199211 59.2362556 59.2514458 59.2654953 59.2783966 59.2901573 
            59.3007736 59.3102455 59.3185692 59.3257446 59.3317719 59.3366547 59.3403893 
            59.3429718 59.3444099 59.344696 59.3438339 59.3418236 59.338665 59.3343582 
            59.3289032 59.3223 59.3145485 59.3056526 59.2956085 59.2844238 59.2720871 
            59.2586136 59.2439919 59.2282295 59.2113266 59.1932869 59.1741028 59.1537857 
            59.1323318 59.1097412 59.0860214 59.0611687 59.035183 59.0080719 58.9798355 
            58.9504738 58.9199867 58.888382 58.8556595 58.8218193 58.7868652 58.7507973 
            58.713623 58.6753426 58.635952 58.5954628 58.553875 58.5111885 58.4674072 
            58.4225388 58.3765755 58.3295326 58.2814026 58.2321968 58.1819115 58.1305542 
            58.078125 58.0246315 57.9700699 57.9144516 57.8577766 57.800045 57.7412682 
            57.6725655 57.7362785 57.798954 57.8605881 57.9211769 57.9807205 58.0392113 
            58.0966454 58.153019 58.2083321 58.2625809 58.3157578 58.3678627 58.4188919 
            58.4688416 58.5177078 58.5654907 58.6121864 58.6577911 58.7022972 58.7457123 
            58.7880211 58.8292313 58.8693352 58.9083328 58.9462204 58.9829941 59.0186501 
            59.0531921 59.0866127 59.1189117 59.1500893 59.1801376 59.2090569 59.2368507 
            59.2635078 59.289032 59.3134232 59.3366776 59.3587914 59.3797646 59.399601 
            59.4182892 59.4358368 59.4522362 59.4674911 59.4816017 59.4945602 59.5063705 
            59.5170326 59.5265427 59.5349007 59.5421066 59.5481606 59.5530624 59.5568123 
            59.5594063 59.5608482 59.5611382 59.5602722 59.5582542 59.5550842 59.5507584 
            59.5452805 59.5386467 59.5308647 59.5219307 59.5118446 59.5006104 59.488224 
            59.4746895 59.4600067 59.4441795 59.4272041 59.4090881 59.3898239 59.3694229 
            59.3478775 59.3251915 59.3013687 59.276413 59.2503204 59.2230949 59.1947403 
            59.1652527 59.1346397 59.1029053 59.0700417 59.0360603 59.0009613 58.9647446 
            58.9274139 58.8889732 58.8494225 58.8087654 58.7670059 58.724144 58.6801796 
            58.6351242 58.588974 58.5417366 58.493412 58.4440002 58.3935127 58.3419456 
            58.2893028 58.2355881 58.180809 58.1249657 58.068058 58.0100975 57.9510803 
            57.8809853 57.9449501 58.0078773 58.0697594 58.1305962 58.1903763 58.2491035 
            58.3067703 58.3633766 58.418911 58.473381 58.5267754 58.5790939 58.6303329 
            58.6804848 58.7295532 58.7775345 58.8244209 58.8702126 58.9149055 58.9584961 
            59.0009842 59.042366 59.082634 59.1217957 59.1598396 59.1967659 59.2325706 
            59.2672577 59.3008194 59.333252 59.3645592 59.3947334 59.4237747 59.451683 
            59.4784546 59.5040894 59.5285797 59.5519333 59.5741386 59.5952034 59.6151199 
            59.6338921 59.6515121 59.6679802 59.6833 59.6974678 59.7104836 59.7223434 
            59.7330513 59.7425995 59.7509956 59.7582321 59.7643127 59.7692375 59.7730026 
            59.7756081 59.7770538 59.7773438 59.7764778 59.7744484 59.7712631 59.7669182 
            59.7614174 59.7547607 59.7469444 59.7379723 59.7278404 59.7165604 59.7041206 
            59.6905289 59.6757851 59.6598892 59.6428452 59.624649 59.6053047 59.584816 
            59.563179 59.5403976 59.5164757 59.4914131 59.46521 59.43787 59.4093971 
            59.3797874 59.3490486 59.3171768 59.2841797 59.2500534 59.2148094 59.1784401 
            59.1409569 59.1023521 59.0626373 59.0218124 58.9798775 58.9368401 58.8926964 
            58.8474541 58.8011131 58.7536812 58.7051582 58.6555443 58.604847 58.5530701 
            58.5002136 58.4462814 58.3912773 58.3352051 58.2780685 58.2198715 58.1606178 
            58.089119 58.1533432 58.2165222 58.2786522 58.3397331 58.3997574 58.4587212 
            58.5166206 58.5734558 58.6292191 58.6839104 58.7375221 58.7900543 58.8415031 
            58.8918648 58.9411354 58.9893112 59.0363922 59.0823708 59.1272469 59.1710205 
            59.2136841 59.2552376 59.2956734 59.3349953 59.3731995 59.4102821 59.4462395 
            59.4810677 59.5147705 59.5473404 59.5787773 59.6090813 59.6382446 59.6662712 
            59.6931534 59.718895 59.7434921 59.7669411 59.7892418 59.8103943 59.8303986 
            59.849247 59.8669434 59.8834839 59.8988686 59.9130974 59.9261665 59.938076 
            59.9488297 59.9584198 59.9668503 59.9741173 59.9802246 59.9851685 59.9889488 
            59.9915657 59.9930191 59.9933128 59.9924393 59.9904022 59.9872055 59.9828415 
            59.9773178 59.9706306 59.96278 59.9537697 59.9435959 59.9322662 59.9197769 
            59.9061279 59.8913193 59.8753586 59.8582382 59.8399658 59.8205414 59.7999649 
            59.7782364 59.7553596 59.7313347 59.7061691 59.6798553 59.652401 59.623806 
            59.5940704 59.5632019 59.5311966 59.4980621 59.4637947 59.4284019 59.39188 
            59.3542404 59.3154755 59.2755966 59.2346001 59.1924896 59.1492729 59.1049461 
            59.0595169 59.012989 58.9653587 58.9166336 58.8668175 58.8159142 58.7639236 
            58.7108498 58.6567001 58.6014709 58.5451736 58.4878044 58.4293709 58.3698769 
            58.2969627 58.3614464 58.424881 58.4872627 58.5485878 58.6088524 58.6680565 
            58.7261925 58.7832565 58.8392487 58.8941612 58.9479942 59.0007401 59.0524025 
            59.1029701 59.1524429 59.2008171 59.2480927 59.2942619 59.339325 59.3832779 
            59.4261208 59.4678459 59.5084534 59.5479393 59.5862999 59.623539 59.6596451 
            59.694622 59.728466 59.7611732 59.7927437 59.8231697 59.852459 59.8806038 
            59.9076004 59.9334488 59.958149 59.9817009 60.004097 60.0253372 60.0454254 
            60.0643539 60.0821266 60.0987358 60.1141853 60.1284752 60.1416016 60.1535645 
            60.16436 60.1739922 60.182457 60.1897583 60.1958885 60.2008553 60.2046509 
            60.2072792 60.2087402 60.209034 60.2081566 60.2061119 60.2028999 60.1985168 
            60.1929703 60.1862526 60.1783714 60.169323 60.1591072 60.147728 60.1351852 
            60.1214752 60.1066055 60.0905762 60.0733833 60.0550346 60.0355263 60.0148621 
            59.993042 59.9700699 59.9459457 59.9206696 59.8942451 59.8666725 59.8379593 
            59.8080978 59.7770996 59.7449608 59.7116852 59.6772766 59.6417313 59.6050606 
            59.5672607 59.5283356 59.4882889 59.4471245 59.4048386 59.3614426 59.3169327 
            59.2713165 59.2245941 59.1767654 59.1278419 59.0778198 59.0267067 58.9745026 
            58.9212151 58.8668404 58.8113861 58.7548599 58.697258 58.638588 58.5788536 
            58.5045128 58.5692558 58.632946 58.6955795 58.7571526 58.8176613 58.8771057 
            58.9354782 58.992775 59.048996 59.1041336 59.1581841 59.2111511 59.2630196 
            59.313797 59.3634758 59.4120483 59.4595184 59.5058823 59.5511322 59.5952682 
            59.6382866 59.6801872 59.7209625 59.7606163 59.7991371 59.8365288 59.8727875 
            59.9079132 59.9418983 59.9747429 60.0064468 60.0370026 60.0664139 60.094677 
            60.1217918 60.1477509 60.172554 60.1962051 60.2186966 60.2400284 60.2602005 
            60.2792091 60.2970581 60.3137398 60.3292542 60.343605 60.3567848 60.3687973 
            60.3796425 60.3893166 60.3978195 60.4051476 60.4113083 60.4162941 60.420105 
            60.4227448 60.4242134 60.4245071 60.4236259 60.4215736 60.4183464 60.4139481 
            60.4083748 60.4016304 60.3937149 60.3846245 60.3743668 60.3629379 60.3503418 
            60.3365746 60.3216438 60.305542 60.2882805 60.2698517 60.2502594 60.2295074 
            60.2075958 60.1845245 60.1602974 60.1349144 60.1083794 60.0806923 60.0518532 
            60.0218697 59.9907379 59.9584618 59.9250488 59.8904915 59.8548012 59.8179741 
            59.7800179 59.7409286 59.7007179 59.6593781 59.6169167 59.5733414 59.5286446 
            59.4828377 59.4359245 59.3879013 59.3387718 59.2885475 59.2372208 59.184803 
            59.1312943 59.0766983 59.0210228 58.9642601 58.9064255 58.8475189 58.7875404 
            58.7117653 58.7767677 58.8407135 58.9035988 58.9654236 59.0261803 59.085865 
            59.144474 59.2020073 59.2584572 59.3138199 59.3680916 59.4212761 59.4733582 
            59.5243454 59.5742264 59.6230049 59.6706696 59.7172241 59.7626648 59.8069839 
            59.8501816 59.8922577 59.9332047 59.9730225 60.0117035 60.0492554 60.0856667 
            60.1209373 60.1550674 60.1880493 60.2198868 60.2505722 60.2801094 60.3084908 
            60.3357201 60.3617897 60.3866997 60.41045 60.4330368 60.4544601 60.4747162 
            60.4938087 60.5117302 60.5284843 60.5440674 60.5584793 60.5717163 60.5837822 
            60.5946693 60.6043854 60.6129227 60.620285 60.6264687 60.6314774 60.6353073 
            60.6379585 60.639431 60.6397247 60.6388435 60.6367798 60.6335411 60.6291199 
            60.6235237 60.6167526 60.6088028 60.5996742 60.5893707 60.5778961 60.5652428 
            60.5514183 60.5364227 60.520256 60.5029144 60.4844093 60.4647331 60.4438934 
            60.4218864 60.3987198 60.3743896 60.3488998 60.3222504 60.294445 60.2654877 
            60.2353745 60.204113 60.1716995 60.1381454 60.1034431 60.0676041 60.0306206 
            59.9925041 59.9532547 59.9128723 59.8713608 59.8287239 59.7849655 59.7400856 
            59.694088 59.6469765 59.5987549 59.5494232 59.4989891 59.4474525 59.3948212 
            59.3410912 59.286274 59.2303658 59.1733742 59.115303 59.0561562 58.9959335 
            58.9187164 58.9839783 59.0481834 59.1113243 59.1733971 59.2343979 59.2943268 
            59.3531761 59.4109421 59.4676247 59.5232124 59.5777092 59.6311111 59.6834106 
            59.7346077 59.7846947 59.8336754 59.8815384 59.9282875 59.9739151 60.0184212 
            60.0617981 60.1040497 60.1451683 60.185154 60.223999 60.2617073 60.2982712 
            60.3336906 60.3679657 60.4010887 60.4330597 60.4638748 60.4935379 60.5220413 
            60.5493813 60.5755615 60.6005783 60.6244316 60.6471138 60.6686287 60.6889725 
            60.7081451 60.7261467 60.7429695 60.7586212 60.7730942 60.7863884 60.7985039 
            60.8094406 60.8191948 60.8277702 60.8351669 60.8413773 60.846405 60.8502502 
            60.8529129 60.854393 60.8546906 60.8538017 60.8517303 60.8484764 60.8440399 
            60.8384209 60.8316154 60.8236313 60.8144646 60.8041191 60.7925949 60.7798882 
            60.7660027 60.7509422 60.7347069 60.7172928 60.6987076 60.6789474 60.65802 
            60.6359177 60.6126518 60.5882187 60.5626183 60.5358582 60.5079346 60.4788513 
            60.4486122 60.4172173 60.3846703 60.3509712 60.316124 60.2801323 60.2429962 
            60.2047195 60.1653023 60.124752 60.083065 60.0402489 59.9963074 59.9512405 
            59.9050522 59.8577461 59.8093224 59.7597885 59.7091484 59.6573982 59.6045494 
            59.5505981 59.4955559 59.4394188 59.3821945 59.3238869 59.2644997 59.2040329 
            59.1253548 59.1908798 59.2553444 59.3187408 59.3810692 59.442318 59.502491 
            59.5615807 59.6195831 59.6764946 59.7323151 59.7870369 59.8406563 59.8931732 
            59.9445801 59.9948769 60.0440559 60.0921211 60.1390648 60.1848831 60.2295723 
            60.2731323 60.3155594 60.3568535 60.3970032 60.4360161 60.4738808 60.510601 
            60.5461693 60.5805893 60.6138496 60.6459579 60.6769066 60.7066956 60.7353172 
            60.7627754 60.7890701 60.8141937 60.8381462 60.8609276 60.882534 60.9029655 
            60.9222183 60.9402962 60.9571915 60.972908 60.9874458 61.0007973 61.0129623 
            61.0239487 61.0337448 61.0423584 61.0497856 61.0560226 61.0610733 61.0649338 
            61.0676079 61.0690956 61.0693932 61.0685005 61.0664215 61.0631523 61.0586967 
            61.053051 61.0462189 61.0382004 61.0289955 61.0186043 61.0070267 60.9942665 
            60.9803238 60.9651985 60.9488907 60.9314041 60.9127388 60.8928947 60.8718758 
            60.8496819 60.8263168 60.8017769 60.7760696 60.7491951 60.7211494 60.6919441 
            60.6615791 60.6300507 60.5973625 60.5635223 60.5285301 60.4923859 60.4550896 
            60.4166527 60.3770714 60.3363495 60.2944908 60.2514954 60.2073669 60.1621132 
            60.1157341 60.0682297 60.0196075 59.9698677 59.919014 59.8670502 59.8139839 
            59.7598114 59.7045403 59.6481743 59.5907173 59.5321693 59.472538 59.4118271 
            59.3316803 59.3974724 59.4621964 59.5258522 59.5884285 59.649929 59.7103462 
            59.76968 59.827919 59.885067 59.9411125 59.9960594 60.0499039 60.1026344 
            60.1542549 60.2047615 60.2541466 60.3024139 60.3495522 60.3955612 60.4404373 
            60.4841805 60.5267868 60.5682526 60.6085739 60.647747 60.6857758 60.7226486 
            60.7583694 60.7929344 60.8263397 60.8585815 60.8896599 60.9195747 60.9483223 
            60.9758987 61.0023041 61.0275345 61.05159 61.0744667 61.0961647 61.116684 
            61.1360245 61.1541786 61.1711464 61.1869316 61.2015266 61.2149391 61.2271576 
            61.2381897 61.2480278 61.2566795 61.2641373 61.270401 61.2754745 61.2793541 
            61.2820396 61.2835312 61.2838287 61.2829323 61.2808456 61.2775612 61.2730865 
            61.2674179 61.2605553 61.2525024 61.2432594 61.2328224 61.2211952 61.2083817 
            61.1943779 61.1791878 61.1628113 61.1452484 61.126503 61.106575 61.0854645 
            61.0631752 61.0397072 61.0150642 60.9892464 60.9622574 60.9340935 60.9047623 
            60.8742676 60.8426056 60.8097801 60.775795 60.740654 60.7043571 60.6669044 
            60.6283035 60.5885544 60.5476608 60.5056267 60.4624519 60.4181404 60.3726959 
            60.3261223 60.2784195 60.2295952 60.1796494 60.1285858 60.0764084 60.0231209 
            59.9687271 59.9132271 59.8566284 59.7989349 59.7401505 59.680275 59.6193161 
            59.5376892 59.6037483 59.6687355 59.7326469 59.7954788 59.8572311 59.9178963 
            59.9774704 60.0359497 60.0933304 60.1496086 60.2047844 60.2588501 60.3118019 
            60.363636 60.4143486 60.4639435 60.5124092 60.559742 60.6059456 60.6510124 
            60.6949387 60.7377243 60.7793617 60.8198547 60.8591957 60.8973808 60.9344139 
            60.9702835 61.0049973 61.0385437 61.0709229 61.1021347 61.1321754 61.1610451 
            61.1887398 61.2152596 61.2405968 61.2647552 61.2877312 61.3095245 61.3301315 
            61.3495522 61.3677864 61.3848267 61.4006805 61.4153404 61.4288063 61.441082 
            61.4521599 61.4620438 61.4707298 61.4782181 61.4845123 61.4896049 61.4934998 
            61.4962006 61.4976959 61.4979973 61.497097 61.4949989 61.491703 61.4872093 
            61.481514 61.4746246 61.4665337 61.4572487 61.4467697 61.4350929 61.4222221 
            61.4081573 61.3929024 61.3764534 61.3588181 61.3399925 61.3199768 61.2987747 
            61.2763901 61.2528229 61.2280731 61.2021446 61.1750412 61.146759 61.1173019 
            61.0866737 61.0548782 61.0219154 60.9877853 60.9524956 60.9160423 60.8784332 
            60.8396683 60.7997513 60.7586861 60.7164764 60.6731186 60.6286201 60.5829849 
            60.5362167 60.4883156 60.4392853 60.3891335 60.3378563 60.2854652 60.2319565 
            60.1773338 60.1216087 60.0647774 60.0068474 59.9478188 59.8876991 59.8264923 
            59.7433777 59.8097 59.8749504 59.9391251 60.0022125 60.0642166 60.1251297 
            60.184948 60.2436676 60.3012848 60.3577957 60.4132004 60.4674873 60.5206604 
            60.5727081 60.6236382 60.6734352 60.7221031 60.7696381 60.8160324 60.86129 
            60.9053993 60.9483643 60.990181 61.0308456 61.0703506 61.1086998 61.1458893 
            61.1819115 61.2167702 61.2504616 61.2829781 61.3143234 61.3444939 61.3734894 
            61.4013023 61.4279327 61.4533806 61.4776421 61.5007172 61.5226059 61.5433006 
            61.5628052 61.5811157 61.5982323 61.614151 61.6288757 61.6424026 61.6547279 
            61.6658554 61.6757812 61.6845055 61.692028 61.6983452 61.7034645 61.7073746 
            61.7100868 61.7115898 61.7118912 61.7109871 61.7088814 61.7055702 61.7010574 
            61.6953392 61.6884155 61.680294 61.6709671 61.6604424 61.648716 61.635788 
            61.621666 61.6063423 61.5898247 61.5721092 61.5531998 61.5331001 61.5118103 
            61.4893303 61.4656601 61.4408035 61.4147644 61.3875427 61.3591385 61.3295555 
            61.2987976 61.2668648 61.2337608 61.1994858 61.1640472 61.1274376 61.0896721 
            61.0507431 61.0106583 60.9694176 60.9270287 60.8834877 60.8388023 60.7929764 
            60.7460136 60.6979103 60.6486778 60.5983124 60.5468254 60.4942131 60.4404831 
            60.3856392 60.3296814 60.2726135 60.214447 60.1551781 60.0948105 60.0333519 
            59.9487343 60.0153275 60.0808449 60.1452789 60.2086258 60.2708817 60.3320465 
            60.3921089 60.4510689 60.5089264 60.56567 60.6213036 60.6758156 60.7292099 
            60.7814751 60.8326149 60.8826218 60.9314957 60.979229 61.0258179 61.0712662 
            61.1155624 61.1587105 61.2007027 61.2415352 61.2812119 61.3197212 61.3570709 
            61.3932457 61.4282532 61.4620895 61.4947472 61.526226 61.5565262 61.5856438 
            61.613575 61.6403198 61.6658783 61.6902466 61.7134209 61.7354012 61.7561874 
            61.7757759 61.7941666 61.8113556 61.8273468 61.8421326 61.8557167 61.8680954 
            61.8792725 61.8892403 61.8980026 61.9055595 61.9119034 61.9170418 61.9209747 
            61.9236946 61.9252052 61.9255066 61.9246025 61.9224854 61.9191589 61.9146271 
            61.9088821 61.9019318 61.8937721 61.884407 61.8738365 61.8620567 61.8490753 
            61.8348885 61.8195 61.8029099 61.7851181 61.7661285 61.7459412 61.7245598 
            61.7019806 61.6782112 61.6532478 61.6270943 61.5997581 61.5712318 61.541523 
            61.5106316 61.4785652 61.4453163 61.4108963 61.3753052 61.3385429 61.3006134 
            61.2615204 61.2212639 61.1798515 61.1372795 61.0935593 61.048687 61.0026665 
            60.9555054 60.9071999 60.8577614 60.8071861 60.7554817 60.702652 60.6487007 
            60.5936279 60.5374374 60.4801369 60.4217262 60.3622131 60.3016014 60.2398911 
            60.1537628 60.2206268 60.2864075 60.3511047 60.414711 60.4772224 60.5386353 
            60.5989456 60.6581535 60.7162476 60.7732277 60.8290901 60.8838272 60.9374428 
            60.9899292 61.0412827 61.0914993 61.1405754 61.1885109 61.2352982 61.2809372 
            61.3254204 61.3687477 61.4109192 61.4519272 61.4917717 61.5304451 61.5679512 
            61.6042862 61.6394424 61.67342 61.7062187 61.7378311 61.768261 61.7975044 
            61.8255577 61.852417 61.8780861 61.9025574 61.9258347 61.9479103 61.9687843 
            61.9884605 62.0069275 62.0241928 62.0402527 62.0551033 62.0687485 62.0811806 
            62.0924034 62.102417 62.1112175 62.1188049 62.1251793 62.1303406 62.1342888 
            62.1370201 62.1385384 62.1388435 62.1379318 62.135807 62.1324654 62.1279144 
            62.1221428 62.1151619 62.1069679 62.0975609 62.0869446 62.0751152 62.0620766 
            62.0478287 62.0323753 62.0157127 61.9978447 61.9787712 61.9584961 61.9370232 
            61.9143448 61.8904724 61.8654022 61.839138 61.8116798 61.7830315 61.7531967 
            61.7221718 61.6899681 61.6565781 61.6220093 61.5862656 61.5493469 61.5112534 
            61.4719963 61.4315681 61.3899803 61.347229 61.3033218 61.2582588 61.2120476 
            61.1646843 61.1161804 61.0665321 61.0157471 60.963829 60.910778 60.8565979 
            60.8012962 60.7448769 60.6873398 60.6286888 60.5689278 60.5080681 60.4461021 
            60.358448 60.4255867 60.4916344 60.5565987 60.6204643 60.6832314 60.7448997 
            60.8054581 60.8649063 60.9232407 60.9804573 61.0365524 61.0915222 61.145359 
            61.1980667 61.2496338 61.3000603 61.3493423 61.39748 61.4444656 61.4902954 
            61.5349693 61.5784798 61.6208305 61.662014 61.7020264 61.7408676 61.7785339 
            61.8150215 61.8503265 61.8844528 61.9173927 61.9491425 61.979702 62.0090714 
            62.0372467 62.0642242 62.0900002 62.1145782 62.1379547 62.1601257 62.1810913 
            62.2008514 62.2194023 62.2367439 62.2528725 62.2677879 62.2814903 62.2939796 
            62.3052521 62.3153076 62.3241463 62.331768 62.3381691 62.3433533 62.3473167 
            62.3500633 62.3515854 62.3518906 62.3509789 62.3488426 62.3454895 62.3409119 
            62.3351212 62.3281097 62.3198776 62.3104324 62.2997665 62.2878876 62.2747917 
            62.2604828 62.244957 62.2282257 62.2102776 62.191124 62.1707611 62.1491928 
            62.1264191 62.1024399 62.0772629 62.0508842 62.0233078 61.9945374 61.9645729 
            61.9334145 61.9010696 61.8675385 61.8328209 61.7969246 61.7598457 61.7215958 
            61.6821671 61.6415672 61.5998001 61.5568695 61.5127754 61.4675255 61.4211159 
            61.3735542 61.3248444 61.2749901 61.2239914 61.1718559 61.1185837 61.0641785 
            61.0086479 60.951992 60.8942146 60.8353233 60.7753181 60.7142029 60.6519852 
            60.5627975 60.6302071 60.6965256 60.7617531 60.825882 60.8889084 60.9508286 
            61.0116386 61.071331 61.1299095 61.1873627 61.2436905 61.2988892 61.352951 
            61.40588 61.4576645 61.5083008 61.5577927 61.6061325 61.6533165 61.6993408 
            61.7442055 61.7879028 61.8304329 61.871788 61.911972 61.9509811 61.9888077 
            62.0254517 62.0609093 62.0951805 62.1282616 62.1601486 62.1908417 62.2203369 
            62.2486343 62.2757263 62.3016167 62.3263016 62.349781 62.3720474 62.3931046 
            62.4129524 62.4315834 62.4489975 62.4651985 62.4801788 62.4939423 62.506485 
            62.517807 62.5279045 62.5367813 62.5444374 62.550869 62.5560722 62.5600548 
            62.5628128 62.5643425 62.5646515 62.5637321 62.5615883 62.5582199 62.5536232 
            62.5478058 62.5407639 62.5324974 62.5230064 62.5122986 62.5003662 62.4872131 
            62.4728394 62.4572487 62.4404411 62.4224167 62.4031792 62.3827286 62.3610649 
            62.338192 62.3141098 62.2888222 62.2623291 62.2346344 62.2057419 62.1756439 
            62.1443558 62.1118698 62.0781937 62.0433273 62.0072784 61.9700432 61.9316254 
            61.8920288 61.8512573 61.8093109 61.7661972 61.7219162 61.6764717 61.6298676 
            61.5821075 61.5331917 61.4831276 61.4319153 61.3795586 61.3260612 61.271431 
            61.2156677 61.1587753 61.1007614 61.041626 60.9813728 60.9200058 60.8575325 
            60.7667961 60.8344803 60.9010696 60.9665642 61.0309563 61.0942421 61.1564178 
            61.2174797 61.27742 61.3362427 61.3939362 61.4504967 61.505928 61.560215 
            61.6133652 61.6653671 61.7162209 61.7659187 61.8144646 61.8618469 61.9080658 
            61.9531212 61.9970055 62.0397148 62.0812492 62.1216049 62.1607819 62.1987686 
            62.2355728 62.271183 62.305603 62.3388252 62.3708496 62.4016762 62.4313011 
            62.4597168 62.4869308 62.5129318 62.5377235 62.561306 62.5836678 62.6048203 
            62.624752 62.6434631 62.6609535 62.6772232 62.6922722 62.7060966 62.7186928 
            62.7300644 62.7402077 62.7491264 62.756813 62.7632713 62.7685013 62.7724991 
            62.7752686 62.7768059 62.7771149 62.7761917 62.7740364 62.7706528 62.7660408 
            62.7601967 62.7531204 62.7448196 62.7352905 62.7245331 62.7125473 62.699337 
            62.6849022 62.6692429 62.6523628 62.6342583 62.6149368 62.5943947 62.5726395 
            62.5496674 62.5254784 62.5000839 62.4734764 62.4456596 62.4166374 62.3864136 
            62.3549881 62.3223648 62.2885399 62.2535248 62.2173195 62.179924 62.1413422 
            62.1015778 62.0606308 62.0185051 61.9752083 61.9307404 61.8851013 61.8382988 
            61.7903366 61.7412148 61.690937 61.6395111 61.5869331 61.5332146 61.4783554 
            61.4223595 61.3652306 61.3069725 61.2475891 61.187088 61.1254692 61.0627365 
            60.9704399 61.0384026 61.1052666 61.1710281 61.2356873 61.2992325 61.3616638 
            61.4229813 61.4831696 61.5422363 61.6001701 61.656971 61.7126312 61.7671471 
            61.8205185 61.8727417 61.9238091 61.9737167 62.0224686 62.0700531 62.1164703 
            62.1617165 62.2057877 62.2486801 62.2903938 62.3309212 62.3702621 62.4084167 
            62.4453773 62.481144 62.5157089 62.5490761 62.5812416 62.6122017 62.6419525 
            62.6704941 62.6978226 62.7239418 62.7488403 62.772522 62.7949867 62.816227 
            62.8362465 62.8550415 62.8726082 62.8889503 62.9040642 62.9179497 62.9305992 
            62.9420204 62.9522095 62.9611664 62.9688873 62.9753761 62.980629 62.9846458 
            62.9874268 62.9889717 62.9892807 62.9883537 62.9861908 62.9827919 62.978157 
            62.9722862 62.9651833 62.9568443 62.9472694 62.9364662 62.924427 62.9111595 
            62.8966599 62.8809357 62.8639793 62.8457985 62.8263893 62.8057594 62.783905 
            62.7608337 62.7365417 62.7110329 62.6843109 62.6563759 62.6272278 62.5968704 
            62.5653076 62.5325432 62.4985771 62.4634094 62.4270477 62.3894882 62.3507423 
            62.3108063 62.2696838 62.2273788 62.1838989 62.1392403 62.0934067 62.0464058 
            61.9982376 61.9489098 61.8984184 61.8467751 61.7939758 61.7400322 61.6849442 
            61.6287117 61.5713463 61.5128441 61.4532166 61.3924637 61.3305893 61.2675972 
            61.1737328 61.2419701 61.3091087 61.3751411 61.4400635 61.5038719 61.5665665 
            61.6281319 61.6885757 61.7478867 61.8060646 61.863102 61.9189949 61.9737396 
            62.0273361 62.0797806 62.1310616 62.1811867 62.2301407 62.2779274 62.324543 
            62.3699799 62.4142418 62.4573174 62.4992104 62.5399132 62.5794258 62.6177444 
            62.6548615 62.6907845 62.7254982 62.7590103 62.791317 62.8224106 62.8522911 
            62.8809586 62.9084053 62.9346352 62.9596443 62.9834328 63.0059929 63.0273285 
            63.0474358 63.0663109 63.0839577 63.1003723 63.115551 63.1294975 63.1422043 
            63.1536751 63.1639099 63.172905 63.1806602 63.1871758 63.1924515 63.1964874 
            63.1992798 63.2008324 63.2011414 63.2002106 63.19804 63.1946259 63.1899681 
            63.1840744 63.1769371 63.1685638 63.158947 63.1480942 63.1360054 63.1226768 
            63.1081161 63.0923195 63.0752907 63.0570259 63.0375366 63.0168152 62.9948654 
            62.9716911 62.9472923 62.9216728 62.8948326 62.8667755 62.8375015 62.8070145 
            62.7753143 62.7424049 62.7082901 62.6729736 62.6364517 62.598732 62.5598183 
            62.5197105 62.4784126 62.4359283 62.3922577 62.3474083 62.301384 62.2541809 
            62.2058105 62.1562691 62.1055679 62.0537033 62.0006828 61.9465103 61.8911896 
            61.8347244 61.7771187 61.7183723 61.6584969 61.5974884 61.5353584 61.4721069 
            61.3766594 61.4451752 61.5125885 61.5788956 61.6440849 61.7081604 61.7711105 
            61.8329353 61.893631 61.9531898 62.0116081 62.0688858 62.1250153 62.1799927 
            62.2338142 62.2864799 62.3379784 62.3883133 62.4374771 62.4854698 62.5322838 
            62.5779152 62.6223679 62.6656303 62.7076988 62.7485809 62.7882614 62.8267441 
            62.8640251 62.9001007 62.934967 62.9686279 63.0010719 63.032299 63.0623131 
            63.0911026 63.1186714 63.1450195 63.1701355 63.1940269 63.2166862 63.2381172 
            63.2583122 63.2772713 63.2949944 63.3114815 63.3267288 63.3407326 63.3535004 
            63.3650208 63.3753014 63.3843346 63.3921242 63.3986702 63.4039688 63.40802 
            63.4108276 63.412384 63.4126968 63.4117622 63.4095802 63.4061508 63.401474 
            63.3955536 63.3883858 63.3799744 63.3703156 63.359417 63.347271 63.3338852 
            63.3192596 63.3033943 63.2862892 63.2679443 63.2483673 63.2275543 63.205513 
            63.1822357 63.1577301 63.132 63.1050415 63.0768585 63.0474586 63.0168381 
            62.9850006 62.9519501 62.9176865 62.8822136 62.8455353 62.8076515 62.7685699 
            62.7282906 62.6868134 62.644146 62.6002884 62.5552483 62.5090256 62.4616203 
            62.413044 62.3632927 62.3123741 62.2602921 62.2070465 62.1526489 62.0970917 
            62.04039 61.9825401 61.9235535 61.8634262 61.802166 61.7397766 61.6762619 
            61.5792198 61.6480179 61.7157097 61.7822876 61.8477478 61.9120865 61.9752998 
            62.037384 62.0983315 62.1581383 62.2168045 62.2743187 62.3306847 62.3858948 
            62.4399452 62.4928322 62.5445518 62.5951004 62.644474 62.6926727 62.7396851 
            62.7855148 62.8301544 62.8736038 62.9158592 62.956913 62.9967651 63.0354156 
            63.0728607 63.1090927 63.1441116 63.1779137 63.2105026 63.2418671 63.2720108 
            63.30093 63.3286171 63.3550797 63.3803101 63.4043045 63.427063 63.4485893 
            63.4688721 63.487915 63.5057182 63.5222778 63.53759 63.5516586 63.5644798 
            63.5760536 63.58638 63.5954552 63.6032791 63.6098518 63.6151733 63.6192436 
            63.6220627 63.6236267 63.6239433 63.6230011 63.6208115 63.6173668 63.6126709 
            63.60672 63.5995216 63.5910721 63.5813713 63.5704231 63.5582237 63.5447807 
            63.5300903 63.5141525 63.4969711 63.47855 63.4588852 63.4379807 63.4158401 
            63.3924599 63.3678474 63.3420029 63.3149261 63.2866211 63.2570915 63.2263374 
            63.1943626 63.1611671 63.1267548 63.0911255 63.0542908 63.016243 62.9769897 
            62.9365349 62.8948822 62.8520279 62.8079834 62.7627487 62.7163277 62.6687202 
            62.6199341 62.569973 62.5188408 62.4665337 62.4130669 62.3584366 62.3026466 
            62.2457047 62.1876144 62.128376 62.067997 62.0064812 61.9438362 61.8800583 
            61.7814064 61.8504868 61.918457 61.9853134 62.0510445 62.1156502 62.1791267 
            62.2414665 62.3026695 62.3627281 62.4216385 62.4794006 62.5360031 62.5914459 
            62.6457253 62.6988373 62.7507782 62.8015442 62.8511276 62.8995323 62.9467468 
            62.9927711 63.0376053 63.0812416 63.1236763 63.1649094 63.204937 63.2437553 
            63.2813606 63.317749 63.3529243 63.3868752 63.4196053 63.451107 63.4813805 
            63.5104256 63.5382385 63.5648155 63.5901566 63.6142578 63.6371193 63.6587372 
            63.6791115 63.6982384 63.7161217 63.7327538 63.7481346 63.7622643 63.7751427 
            63.7867699 63.7971382 63.8062553 63.8141136 63.8207169 63.8260651 63.8301506 
            63.8329811 63.8345566 63.8348694 63.8339272 63.8317261 63.8282661 63.8235474 
            63.8175735 63.8103409 63.8018532 63.7921104 63.7811127 63.7688599 63.7553558 
            63.7406006 63.7245941 63.7073364 63.6888313 63.6690788 63.6480827 63.625843 
            63.6023636 63.5776405 63.5516815 63.5244865 63.4960594 63.4664001 63.4355087 
            63.4033928 63.3700523 63.3354912 63.2997093 63.2627106 63.2244987 63.1850739 
            63.1444435 63.1026115 63.0595741 63.0153389 62.9699097 62.9232864 62.8754768 
            62.8264847 62.7763062 62.7249565 62.6724281 62.6187325 62.5638695 62.5078468 
            62.4506645 62.3923264 62.3328438 62.272213 62.2104378 62.1475296 62.0834885 
            61.9832153 62.0525818 62.1208344 62.1879616 62.2539673 62.3188438 62.3825836 
            62.4451866 62.5066452 62.5669556 62.6261177 62.6841202 62.740963 62.7966423 
            62.8511505 62.9044876 62.9566498 63.0076332 63.0574303 63.106041 63.1534615 
            63.1996841 63.244709 63.2885361 63.3311539 63.3725662 63.4127693 63.4517555 
            63.4895248 63.5260735 63.5614014 63.5955009 63.6283722 63.6600151 63.6904221 
            63.7195969 63.7475319 63.7742233 63.7996788 63.8238869 63.8468475 63.8685608 
            63.8890266 63.9082375 63.9262009 63.9429054 63.9583549 63.9725494 63.9854851 
            63.9971619 64.007576 64.0167389 64.0246277 64.0312653 64.0366287 64.040741 
            64.0435791 64.0451584 64.0454788 64.0445328 64.0423203 64.0388412 64.0341034 
            64.0281067 64.0208435 64.0123138 64.0025253 63.9914818 63.9791756 63.9656105 
            63.9507866 63.9347076 63.9173775 63.8987885 63.878952 63.8578606 63.8355217 
            63.8119354 63.7871056 63.7610321 63.7337189 63.705162 63.6753731 63.6443481 
            63.6120911 63.5786018 63.5438881 63.5079498 63.4707909 63.432415 63.3928185 
            63.3520126 63.3099976 63.2667732 63.2223473 63.1767197 63.1298981 63.0818825 
            63.0326805 62.9822884 62.9307175 62.8779678 62.8240433 62.7689476 62.7126846 
            62.655262 62.5966797 62.5369453 62.476059 62.4140282 62.3508568 62.2865486 
            62.1846428 62.2542953 62.3228302 62.3902359 62.4565163 62.5216637 62.5856705 
            62.6485329 62.7102509 62.7708168 62.8302269 62.8884735 62.9455566 63.0014725 
            63.0562172 63.1097832 63.1621666 63.2133675 63.2633781 63.3121986 63.3598213 
            63.4062462 63.4514656 63.4954796 63.5382881 63.5798798 63.6202545 63.6594124 
            63.6973457 63.7340546 63.7695351 63.8037872 63.8368034 63.8685837 63.899128 
            63.9284286 63.9564896 63.9832993 64.0088654 64.0331802 64.0562439 64.0780563 
            64.0986099 64.1179123 64.1359482 64.1527328 64.168251 64.1825104 64.1955032 
            64.2072296 64.2176971 64.2268906 64.2348175 64.2414856 64.2468796 64.2509995 
            64.2538605 64.2554474 64.2557602 64.2548065 64.2525864 64.2490997 64.244339 
            64.2383118 64.2310104 64.2224503 64.2126236 64.2015228 64.1891632 64.1755371 
            64.1606522 64.1445007 64.1270905 64.1084213 64.0884933 64.0673065 64.0448685 
            64.0211792 63.9962387 63.9700508 63.9426155 63.9139328 63.8840103 63.8528481 
            63.8204498 63.7868156 63.7519493 63.7158546 63.6785316 63.6399841 63.6002197 
            63.5592346 63.5170364 63.4736252 63.4290047 63.3831825 63.3361588 63.2879372 
            63.2385216 63.1879158 63.1361198 63.0831451 63.0289917 62.9736633 62.91716 
            62.8594933 62.8006668 62.7406769 62.6795349 62.6172447 62.5538101 62.4892311 
            62.3856812 62.4556236 62.5244408 62.5921288 62.6586838 62.724102 62.7883759 
            62.8515053 62.9134827 62.9743042 63.0339622 63.0924606 63.1497841 63.2059402 
            63.2609138 63.3147087 63.367321 63.4187393 63.4689674 63.5179977 63.5658264 
            63.6124496 63.6578674 63.702076 63.7450676 63.7868385 63.8273926 63.8667221 
            63.9048233 63.9416924 63.9773293 64.011734 64.0448914 64.0768127 64.1074905 
            64.1369247 64.1651077 64.1920395 64.21772 64.2421417 64.2653046 64.2872162 
            64.3078613 64.3272476 64.3453674 64.3622208 64.3778152 64.3921356 64.4051895 
            64.4169693 64.427475 64.4367142 64.4446793 64.4513702 64.4567947 64.4609375 
            64.4638062 64.4654007 64.4657211 64.4647598 64.462532 64.4590225 64.4542389 
            64.4481888 64.4408569 64.4322586 64.4223785 64.411232 64.398819 64.3851318 
            64.3701782 64.3539581 64.3364639 64.3177109 64.297699 64.2764206 64.2538834 
            64.2300873 64.2050323 64.1787262 64.1511688 64.1223679 64.092308 64.0610123 
            64.0284653 63.9946861 63.9596634 63.9234123 63.8859253 63.8472099 63.8072701 
            63.7661057 63.7237206 63.6801224 63.6353111 63.5892906 63.5420609 63.4936295 
            63.4440002 63.393177 63.3411636 63.2879601 63.2335739 63.178009 63.1212692 
            63.0633583 63.0042801 62.9440384 62.882637 62.8200836 62.756382 62.6915359 
            62.5863304 62.656559 62.7256622 62.7936325 62.860466 62.9261589 62.9907036 
            63.0540962 63.116333 63.1774139 63.2373238 63.2960701 63.3536415 63.4100342 
            63.4652443 63.519268 63.5721054 63.623745 63.6741905 63.7234306 63.7714691 
            63.8182983 63.8639107 63.9083099 63.9514885 63.9934464 64.0341797 64.0736771 
            64.1119461 64.1489792 64.1847763 64.2193298 64.2526398 64.2846985 64.3155136 
            64.3450775 64.3733826 64.4004364 64.4262314 64.4507599 64.4740295 64.4960403 
            64.516777 64.5362473 64.554451 64.5713806 64.5870438 64.6014252 64.6145325 
            64.6263733 64.6369247 64.6462097 64.654213 64.6609344 64.6663742 64.6705399 
            64.6734161 64.6750183 64.6753387 64.6743774 64.6721344 64.6686172 64.6638107 
            64.6577301 64.6503677 64.6417313 64.6318054 64.6206131 64.608139 64.5943909 
            64.5793686 64.5630722 64.5455093 64.5266724 64.5065613 64.4851913 64.4625549 
            64.438652 64.4134903 64.3870621 64.3593826 64.330452 64.3002625 64.2688217 
            64.2361374 64.2022018 64.1670303 64.1306152 64.0929642 64.0540771 64.0139618 
            63.9726219 63.9300537 63.8862648 63.8412552 63.7950325 63.7476006 63.6989632 
            63.6491165 63.5980759 63.5458374 63.4924049 63.4377861 63.3819847 63.3250008 
            63.2668419 63.2075157 63.1470184 63.0853615 63.0225449 62.9585724 62.8934555 
            62.7865791 62.8570976 62.9264908 62.9947433 63.0618553 63.1278229 63.1926384 
            63.2563019 63.3188019 63.3801384 63.4403038 63.4992981 63.5571175 63.6137505 
            63.6691971 63.7234573 63.7765198 63.8283844 63.8790436 63.9285011 63.9767456 
            64.0237808 64.0695953 64.1141815 64.1575546 64.1996918 64.2406006 64.2802811 
            64.318718 64.3559113 64.391861 64.4265671 64.4600296 64.4922333 64.5231857 
            64.5528793 64.5813141 64.6084824 64.6343918 64.6590347 64.6824112 64.7045135 
            64.7253494 64.7449036 64.7631912 64.7801971 64.795929 64.810379 64.8235474 
            64.835434 64.8460388 64.8553619 64.8634033 64.8701553 64.875618 64.8797989 
            64.8826981 64.8843002 64.8846283 64.8836594 64.8814087 64.8778687 64.8730469 
            64.8669357 64.8595428 64.8508606 64.8408966 64.8296509 64.8171234 64.8033142 
            64.7882233 64.7718506 64.7542114 64.7352829 64.7150879 64.6936188 64.6708832 
            64.6468735 64.6215973 64.5950546 64.5672531 64.5381851 64.5078659 64.4762878 
            64.4434586 64.4093704 64.3740463 64.337471 64.2996521 64.2605972 64.2202988 
            64.1787796 64.1360245 64.092041 64.0468369 64.000412 63.952774 63.903923 
            63.8538666 63.8026009 63.7501373 63.696476 63.6416245 63.5855827 63.5283546 
            63.4699478 63.4103699 63.349617 63.2876968 63.2246132 63.1603737 63.0949821 
            62.9864235 63.0572395 63.1269188 63.1954575 63.2628517 63.3290939 63.3941841 
            63.4581146 63.5208778 63.5824776 63.6428986 63.7021446 63.7602081 63.8170853 
            63.8727722 63.9272652 63.9805565 64.0326462 64.0835266 64.133194 64.1816559 
            64.2288895 64.2749023 64.3196945 64.3632507 64.4055786 64.4466629 64.4865189 
            64.5251236 64.5624847 64.5985947 64.6334534 64.6670609 64.6994095 64.7304993 
            64.7603302 64.788887 64.816185 64.8422089 64.8669586 64.8904419 64.9126434 
            64.9335709 64.9532166 64.9715881 64.9886703 65.0044708 65.0189819 65.0322113 
            65.0441589 65.0548096 65.0641708 65.0722504 65.0790329 65.0845261 65.0887222 
            65.091629 65.0932465 65.0935669 65.092598 65.0903397 65.0867844 65.0819397 
            65.075798 65.0683746 65.0596542 65.0496445 65.0383453 65.0257568 65.0118866 
            64.996727 64.9802856 64.9625626 64.9435577 64.9232712 64.9017029 64.8788605 
            64.854744 64.8293533 64.8026962 64.774765 64.745575 64.7151108 64.6833954 
            64.6504135 64.6161804 64.5806961 64.5439606 64.5059738 64.4667435 64.4262772 
            64.3845673 64.341629 64.2974548 64.2520523 64.2054214 64.1575775 64.1085129 
            64.0582352 64.006752 63.9540596 63.9001694 63.8450775 63.7887955 63.7313271 
            63.6726685 63.6128349 63.5518227 63.4896431 63.4262924 63.3617821 63.2961159 
            63.1858597 63.2569695 63.3269386 63.3957672 63.4634438 63.5299644 63.5953293 
            63.6595306 63.7225609 63.78442 63.8451042 63.9046021 63.9629135 64.0200348 
            64.0759659 64.1306915 64.1842117 64.2365265 64.2876282 64.3375168 64.3861847 
            64.4336243 64.4798431 64.524826 64.5685806 64.6110916 64.652359 64.6923904 
            64.731163 64.768692 64.8049698 64.8399811 64.8737411 64.9062347 64.9374619 
            64.9674225 64.996109 65.0235291 65.0496674 65.0745316 65.0981216 65.1204224 
            65.1414413 65.1611786 65.1796265 65.1967926 65.2126617 65.2272415 65.2405319 
            65.252533 65.2632294 65.2726364 65.2807465 65.2875595 65.2930832 65.2973022 
            65.3002243 65.3018417 65.3021698 65.3011932 65.2989197 65.2953491 65.2904816 
            65.284317 65.2768555 65.2680969 65.2580414 65.2466965 65.2340469 65.2201157 
            65.2048874 65.1883698 65.1705627 65.151474 65.1310959 65.1094284 65.0864868 
            65.0622635 65.0367584 65.0099792 64.981926 64.9525986 64.9220047 64.8901443 
            64.8570175 64.8226318 64.7869873 64.7500839 64.711937 64.6725311 64.6318817 
            64.5899887 64.5468597 64.5024872 64.4568863 64.4100571 64.3619995 64.3127213 
            64.2622299 64.2105179 64.1576004 64.1034775 64.0481491 63.9916229 63.9339066 
            63.875 63.8149109 63.7536392 63.6911926 63.6275749 63.5627937 63.4968491 
            63.3848839 63.4562874 63.5265503 63.595665 63.6636276 63.7304306 63.7960701 
            63.8605461 63.9238434 63.9859695 64.0469055 64.1066666 64.1652298 64.2225952 
            64.2787628 64.333725 64.3874817 64.4400253 64.4913483 64.5414505 64.590332 
            64.6379852 64.6844025 64.7295837 64.7735291 64.8162308 64.8576889 64.8978882 
            64.9368362 64.9745331 65.0109711 65.0461426 65.0800476 65.1126862 65.1440582 
            65.1741486 65.2029724 65.2305069 65.2567673 65.2817459 65.3054352 65.3278427 
            65.3489609 65.3687897 65.3873215 65.4045563 65.4205017 65.4351501 65.4485016 
            65.4605484 65.4712982 65.480751 65.4888992 65.4957428 65.5012894 65.5055237 
            65.508461 65.5100937 65.5104141 65.5094376 65.5071564 65.5035706 65.4986801 
            65.492485 65.4849854 65.4761887 65.4660873 65.454689 65.4419861 65.4279861 
            65.4126968 65.3961029 65.378212 65.3590317 65.338562 65.316803 65.2937546 
            65.2694168 65.2437973 65.2168961 65.1887207 65.1592636 65.1285324 65.0965271 
            65.0632553 65.028717 64.9929123 64.9558411 64.9175186 64.8779449 64.8371124 
            64.7950363 64.7517166 64.7071533 64.6613464 64.6143112 64.5660477 64.5165558 
            64.4658356 64.4139023 64.3607559 64.3063965 64.2508316 64.1940613 64.1360931 
            64.0769348 64.0165863 63.9550552 63.8923416 63.8284531 63.7633972 63.6971741 
            63.5834846 63.6551895 63.7257462 63.7951546 63.8633995 63.9304886 63.9964066 
            64.0611496 64.1247253 64.1871109 64.2483139 64.3083267 64.3671417 64.4247589 
            64.481163 64.5363693 64.5903549 64.6431274 64.6946793 64.7450027 64.7940979 
            64.8419571 64.8885803 64.9339676 64.9781036 65.0209961 65.0626297 65.1030121 
            65.1421356 65.1800003 65.2165985 65.2519302 65.2859879 65.318779 65.3502884 
            65.3805161 65.409462 65.4371262 65.4635086 65.4886017 65.5123978 65.5349045 
            65.5561142 65.5760345 65.5946503 65.611969 65.6279831 65.6427002 65.6561127 
            65.6682205 65.6790161 65.6885071 65.6966934 65.7035675 65.709137 65.7133942 
            65.7163467 65.7179794 65.7183075 65.7173309 65.7150345 65.7114334 65.7065201 
            65.7002945 65.6927643 65.6839294 65.6737823 65.6623306 65.6495667 65.6355057 
            65.6201401 65.6034698 65.5855026 65.5662384 65.5456696 65.5238113 65.5006561 
            65.4762115 65.4504776 65.4234543 65.3951492 65.3655624 65.3346863 65.3025436 
            65.2691193 65.2344208 65.1984558 65.161232 65.1227341 65.0829773 65.0419693 
            64.9997025 64.956192 64.9114304 64.8654251 64.8181839 64.7697067 64.7199936 
            64.6690598 64.6168976 64.5635147 64.5089188 64.4531097 64.3960953 64.337883 
            64.2784653 64.2178574 64.1560669 64.0930862 64.028923 63.9635925 63.8970909 
            63.7816658 63.8536682 63.9245224 63.9942207 64.0627594 64.130127 64.1963272 
            64.2613525 64.3251877 64.3878479 64.4493103 64.5095825 64.5686493 64.6265182 
            64.6831741 64.7386169 64.7928391 64.8458405 64.8976135 64.9481583 64.9974747 
            65.0455475 65.0923767 65.1379623 65.1822891 65.2253723 65.2671967 65.3077621 
            65.3470612 65.3850937 65.4218521 65.4573441 65.4915543 65.5244904 65.5561447 
            65.5865097 65.6155853 65.6433792 65.6698761 65.6950836 65.7189865 65.7416 
            65.7629089 65.7829132 65.8016205 65.8190155 65.8351059 65.8498917 65.8633575 
            65.8755188 65.8863678 65.8959045 65.904129 65.9110413 65.9166336 65.9209061 
            65.9238739 65.9255142 65.9258423 65.9248581 65.922554 65.9189377 65.9140015 
            65.9077454 65.9001846 65.891304 65.8811111 65.869606 65.8567886 65.842659 
            65.8272247 65.8104782 65.7924271 65.7730713 65.7524185 65.7304535 65.7071991 
            65.6826401 65.6567917 65.6296463 65.6012115 65.5714874 65.5404739 65.5081863 
            65.4746094 65.4397583 65.4036331 65.3662338 65.3275681 65.2876358 65.2464447 
            65.2039871 65.1602859 65.1153259 65.0691147 65.0216599 64.9729691 64.9230423 
            64.8718796 64.8194885 64.7658768 64.7110443 64.6549911 64.5977325 64.5392685 
            64.479599 64.4187317 64.3566666 64.2934189 64.2289886 64.1633759 64.0965881 
            63.9794121 64.0517197 64.1228714 64.1928635 64.2616882 64.3293457 64.3958282 
            64.4611282 64.5252457 64.5881653 64.6498947 64.7104263 64.7697525 64.8278656 
            64.8847733 64.9404526 64.9949188 65.0481491 65.1001587 65.1509247 65.2004547 
            65.2487335 65.2957764 65.3415604 65.3860931 65.4293671 65.4713745 65.5121231 
            65.5515976 65.589798 65.6267242 65.6623764 65.6967468 65.7298279 65.7616196 
            65.7921295 65.8213425 65.8492584 65.8758774 65.9011917 65.925209 65.9479218 
            65.9693298 65.9894333 66.0082169 66.0256958 66.0418625 66.0567093 66.0702438 
            66.0824585 66.0933609 66.1029434 66.1111984 66.1181412 66.1237564 66.1280594 
            66.1310349 66.1326828 66.1330185 66.1320267 66.1297073 66.1260757 66.1211166 
            66.1148376 66.1072388 66.0983124 66.0880737 66.0765152 66.0636444 66.0494461 
            66.0339432 66.0171204 65.9989853 65.9795456 65.9587936 65.9367294 65.9133682 
            65.8886948 65.8627243 65.8354568 65.8068924 65.7770386 65.7458878 65.7134476 
            65.679718 65.6447144 65.6084213 65.5708542 65.5320206 65.4919052 65.450531 
            65.4078827 65.3639832 65.3188248 65.2724152 65.2247467 65.1758423 65.1256943 
            65.0743103 65.0216904 64.9678421 64.9127655 64.8564758 64.7989655 64.740242 
            64.6803131 64.6191864 64.5568542 64.4933319 64.428627 64.3627319 64.2956619 
            64.1767273 64.2493362 64.3207932 64.3910751 64.4601974 64.5281372 64.594902 
            64.6604843 64.7248764 64.7880707 64.8500671 64.9108582 64.9704437 65.0288086 
            65.0859604 65.1418915 65.1965866 65.250061 65.3022919 65.3532791 65.4030304 
            65.4515305 65.4987793 65.5447693 65.5895004 65.6329651 65.6751633 65.7160873 
            65.7557449 65.7941208 65.8312149 65.8670273 65.9015503 65.9347839 65.9667206 
            65.9973679 66.0267105 66.0547562 66.0814972 66.1069336 66.1310577 66.1538773 
            66.1753769 66.1955719 66.214447 66.2320023 66.2482452 66.2631607 66.2767563 
            66.289032 66.2999802 66.3096085 66.3179016 66.3248749 66.3305206 66.3348389 
            66.3378296 66.3394852 66.3398209 66.3388214 66.3365021 66.3328476 66.3278656 
            66.3215561 66.3139191 66.3049622 66.2946701 66.2830582 66.2701263 66.255867 
            66.2402878 66.2233887 66.2051697 66.1856384 66.1647949 66.1426315 66.1191559 
            66.0943756 66.0682907 66.0408936 66.0121994 65.9822083 65.9509125 65.9183273 
            65.8844452 65.8492813 65.8128281 65.7750931 65.7360764 65.6957855 65.6542206 
            65.6113892 65.5672913 65.5219269 65.4753113 65.4274368 65.3783112 65.3279419 
            65.276329 65.2234802 65.1693954 65.1140747 65.0575409 64.9997787 64.9408035 
            64.8806152 64.8192215 64.7566223 64.6928329 64.6278458 64.5616684 64.4943161 
            64.3735962 64.4465179 64.5182724 64.5888596 64.6582718 64.7265015 64.7935562 
            64.8594131 64.9240799 64.9875488 65.0498123 65.1108704 65.1707153 65.2293396 
            65.2867355 65.3429108 65.39785 65.4515533 65.5040207 65.5552368 65.6052017 
            65.653923 65.7013779 65.7475739 65.7925034 65.8361664 65.8785553 65.9196701 
            65.9595032 65.9980469 66.0353088 66.0712814 66.1059647 66.1393509 66.1714325 
            66.2022171 66.2316971 66.2598724 66.2867355 66.3122864 66.336525 66.3594437 
            66.3810501 66.4013367 66.4202957 66.4379349 66.4542465 66.4692383 66.4828949 
            66.495224 66.5062256 66.5158997 66.524231 66.5312424 66.536911 66.5412445 
            66.5442505 66.5459213 66.5462494 66.5452499 66.5429153 66.5392456 66.5342407 
            66.5279007 66.5202332 66.5112305 66.5008926 66.4892273 66.4762344 66.4619064 
            66.4462585 66.4292831 66.4109802 66.3913574 66.3704147 66.3481522 66.3245697 
            66.299675 66.273468 66.2459488 66.2171173 66.1869888 66.1555557 66.122818 
            66.0887833 66.0534592 66.0168381 65.9789352 65.939743 65.8992691 65.8575211 
            65.8144913 65.770195 65.7246323 65.677803 65.6297226 65.5803757 65.5297852 
            65.4779434 65.4248581 65.3705368 65.3149796 65.2581863 65.2001801 65.1409454 
            65.0804901 65.0188293 64.9559631 64.8918991 64.8266296 64.7601776 64.6925354 
            64.5700226 64.6432495 64.7153091 64.7861938 64.8559036 64.9244308 64.9917679 
            65.0579071 65.1228561 65.1865997 65.2491379 65.3104553 65.3705597 65.4294357 
            65.4870911 65.5435104 65.5986938 65.6526337 65.7053299 65.7567749 65.8069687 
            65.8559036 65.9035721 65.9499741 65.9951096 66.0389633 66.081543 66.1228409 
            66.1628571 66.2015839 66.2390137 66.2751465 66.3099899 66.3435211 66.3757553 
            66.4066849 66.4362946 66.4645996 66.4915848 66.5172577 66.5416031 66.5646362 
            66.5863419 66.60672 66.6257629 66.643486 66.659874 66.6749344 66.6886597 
            66.7010422 66.7120972 66.7218094 66.7301865 66.7372208 66.7429199 66.7472763 
            66.7502975 66.751976 66.7523041 66.7513046 66.7489548 66.7452698 66.740242 
            66.7338715 66.7261658 66.7171173 66.7067413 66.695015 66.6819611 66.667572 
            66.6518478 66.6347961 66.6164093 66.5966949 66.5756531 66.5532837 66.5295944 
            66.5045853 66.4782562 66.4506149 66.4216537 66.3913803 66.3598022 66.3269196 
            66.2927322 66.2572403 66.220459 66.1823807 66.143013 66.102356 66.0604172 
            66.0171967 65.972702 65.9269333 65.8798981 65.8315964 65.7820282 65.7312088 
            65.6791382 65.625824 65.5712585 65.5154572 65.4584198 65.4001541 65.3406601 
            65.2799454 65.2180176 65.1548767 65.0905304 65.0249863 64.9582443 64.8903122 
            64.7659988 64.8395309 64.9118958 64.9830856 65.053093 65.1219101 65.189537 
            65.2559662 65.3211975 65.3852158 65.4480209 65.509613 65.5699768 65.6291122 
            65.6870193 65.7436905 65.799118 65.8532944 65.9062271 65.957901 66.008316 
            66.0574722 66.1053543 66.1519623 66.1973038 66.2413559 66.2841339 66.3256149 
            66.3658142 66.4047089 66.4423141 66.4786148 66.5136108 66.5473022 66.5796814 
            66.6107483 66.6405029 66.6689377 66.6960449 66.7218399 66.7462997 66.7694321 
            66.7912369 66.8117142 66.8308487 66.8486557 66.8651199 66.880249 66.8940353 
            66.9064789 66.9175797 66.9273453 66.9357605 66.9428253 66.948555 66.9529266 
            66.9559631 66.9576492 66.9579849 66.9569702 66.9546127 66.9509125 66.9458618 
            66.9394608 66.9317169 66.9226303 66.9122009 66.9004211 66.8873062 66.8728485 
            66.8570557 66.83992 66.8214493 66.8016434 66.7805023 66.7580338 66.73423 
            66.7091064 66.6826553 66.6548843 66.6257935 66.5953827 66.5636597 66.5306244 
            66.4962769 66.4606247 66.4236755 66.3854218 66.345871 66.3050308 66.2629013 
            66.2194901 66.1747894 66.1288147 66.0815735 66.0330505 65.9832687 65.9322205 
            65.879921 65.8263626 65.7715607 65.7155075 65.6582184 65.5997009 65.5399475 
            65.4789658 65.4167709 65.3533554 65.2887344 65.2229004 65.1558762 65.0876465 
