# Supplementary material for: A comparison of sea salt emission parameterizations in northwestern Europe using a chemistry transport model setup
Source: Copernicus journal article supplement (doi:10.5194/acp-16-9905-2016), 2016-08-08
Supplement: Supplementary file 2 [file acp-16-9905-2016-supplement.zip › input_files/griddef_CMAQ_CD72]

#
# gridID 0
#
gridtype  = curvilinear
gridsize  = 3762
xname     = LON
xlongname = longitudes      
xunits    = degree east     
yname     = LAT
ylongname = latitudes       
yunits    = degree north    
xsize     = 57
ysize     = 66
xvals     = -9.46603012 -8.75178528 -8.03448677 -7.31423235 -6.59112024 -5.86525154 
            -5.13673115 -4.40566587 -3.6721642 -2.93633795 -2.19830108 -1.45816946 
            -0.716061115 0.0279038753 0.773603618 1.52091432 2.26971078 3.01986575 
            3.77125144 4.52373791 5.27719402 6.0314889 6.78648901 7.54206133 8.29807186 
            9.05438614 9.81086826 10.5673857 11.323801 12.0799799 12.8357878 13.5910912 
            14.3457546 15.0996475 15.8526344 16.6045876 17.3553734 18.104866 18.8529339 
            19.5994549 20.3443031 21.0873547 21.8284893 22.5675888 23.3045349 24.0392132 
            24.7715092 25.5013161 26.2285233 26.9530277 27.6747227 28.3935127 29.1092949 
            29.8219795 30.5314713 31.2376804 31.9405231 -9.6443758 -8.92408943 -8.20066833 
            -7.47421169 -6.74481916 -6.01259613 -5.27764797 -4.54008532 -3.80001903 
            -3.05756354 -2.31283593 -1.56595492 -0.817041636 -0.0662193447 0.686386704 
            1.44064951 2.19644022 2.9536283 3.71208215 4.47166824 5.23225212 5.9936986 
            6.75587082 7.51863146 8.28184319 9.04536724 9.80906487 10.5727968 11.3364248 
            12.0998106 12.8628139 13.6252975 14.3871241 15.1481562 15.9082584 16.6672955 
            17.4251328 18.1816387 18.9366817 19.6901321 20.4418621 21.1917439 21.9396572 
            22.6854763 23.4290829 24.1703587 24.9091873 25.6454563 26.379055 27.1098766 
            27.8378124 28.5627651 29.2846298 30.0033131 30.7187195 31.4307594 32.1393433 
            -9.82595253 -9.09952927 -8.36988735 -7.63712597 -6.90135002 -6.16266537 
            -5.42118073 -4.67700863 -3.93026328 -3.18106198 -2.42952466 -1.67577291 
            -0.919931412 -0.162126645 0.597512841 1.35885644 2.12177181 2.88612485 
            3.65178013 4.41860056 5.18644762 5.95518208 6.72466373 7.49475098 8.2653017 
            9.03617477 9.80722618 10.5783129 11.3492928 12.1200228 12.8903599 13.660162 
            14.429287 15.1975956 15.9649467 16.7312012 17.4962234 18.2598743 19.0220203 
            19.7825279 20.5412674 21.2981052 22.0529175 22.8055782 23.5559616 24.3039494 
            25.0494232 25.7922668 26.5323639 27.2696075 28.0038891 28.7351036 29.46315 
            30.1879253 30.909338 31.6272926 32.3417015 -10.0108452 -9.27818775 -8.54222393 
            -7.80305624 -7.06079006 -6.31553459 -5.56740141 -4.81650543 -4.06296396 
            -3.30689716 -2.54842782 -1.7876811 -1.02478492 -0.259868979 0.506934464 
            1.27549136 2.0456655 2.81731915 3.59031296 4.36450577 5.13975573 5.91591883 
            6.69285059 7.47040606 8.24843979 9.02680302 9.80535126 10.5839367 11.3624105 
            12.1406279 12.9184408 13.6957026 14.4722681 15.2479925 16.0227318 16.7963428 
            17.5686836 18.3396149 19.1089973 19.8766956 20.6425705 21.4064941 22.1683311 
            22.9279556 23.6852379 24.4400578 25.1922913 25.9418201 26.68853 27.4323044 
            28.1730347 28.910614 29.6449356 30.3759022 31.1034145 31.8273754 32.5476952 
            -10.1991453 -9.46015453 -8.71776581 -7.972085 -7.22321987 -6.47128201 
            -5.71638536 -4.9586482 -4.19819021 -3.43513513 -2.66960859 -1.90173924 
            -1.13165832 -0.359499186 0.414602429 1.1905086 1.96807945 2.74717307 
            3.5276463 4.30935431 5.09214973 5.87588596 6.66041422 7.44558382 8.23124599 
            9.01724815 9.80344009 10.5896702 11.3757858 12.1616373 12.947072 13.7319393 
            14.5160904 15.2993746 16.0816441 16.8627529 17.6425552 18.4209061 19.1976604 
            19.972683 20.7458305 21.5169678 22.2859592 23.0526733 23.8169804 24.5787525 
            25.3378639 26.0941963 26.8476276 27.5980434 28.3453312 29.0893784 29.8300819 
            30.5673351 31.3010406 32.0310974 32.7574196 -10.3909454 -9.64551926 -8.89660072 
            -8.14429855 -7.38872337 -6.62998819 -5.86821079 -5.10351181 -4.33601427 
            -3.56584477 -2.79313254 -2.01800942 -1.24061036 -0.461072177 0.320465475 
            1.10386086 1.88897014 2.67564726 3.46374512 4.25311422 5.04360342 5.83506155 
            6.62733507 7.42026997 8.21371174 9.00750351 9.80149078 10.5955172 11.3894272 
            12.1830626 12.9762707 13.7688942 14.5607786 15.3517714 16.1417198 16.9304714 
            17.7178783 18.5037899 19.2880592 20.0705452 20.8511009 21.6295853 22.4058647 
            23.1797981 23.9512558 24.7201042 25.4862194 26.2494717 27.0097427 27.7669125 
            28.5208664 29.2714901 30.0186749 30.7623177 31.5023117 32.2385635 32.970974 
            -10.5863419 -9.83437538 -9.07882023 -8.31978703 -7.5573864 -6.79173756 
            -6.02295876 -5.25117445 -4.476511 -3.69909787 -2.91906786 -2.13655639 
            -1.35170174 -0.564644992 0.224470466 1.01549888 1.80829239 2.60270095 
            3.39857244 4.19575357 4.99408865 5.79342175 6.59359503 7.39444923 8.19582558 
            8.99756336 9.79950237 10.6014814 11.4033403 12.2049179 13.006053 13.8065872 
            14.6063595 15.4052134 16.2029915 16.9995365 17.7946949 18.588316 19.3802452 
            20.1703358 20.9584389 21.7444134 22.5281143 23.3094025 24.0881405 24.8641949 
            25.637434 26.407732 27.1749611 27.9390011 28.6997318 29.4570408 30.2108135 
            30.9609451 31.7073307 32.4498672 33.1884575 -10.7854328 -10.0268211 -9.26451969 
            -8.49864101 -7.72929955 -6.95661592 -6.18071318 -5.40171719 -4.61975765 
            -3.83496833 -3.04748487 -2.25744677 -1.46499574 -0.670276999 0.126562119 
            0.925371706 1.72599947 2.52829099 3.3320899 4.13723803 4.94357586 5.75094175 
            6.55917311 7.36810684 8.17757797 8.98742294 9.79747391 10.6075668 11.4175358 
            12.2272139 13.036437 13.8450403 14.6528597 15.4597321 16.2654953 17.0699883 
            17.8730526 18.6745319 19.4742699 20.2721138 21.0679111 21.8615131 22.6527767 
            23.441555 24.2277088 25.0110989 25.7915936 26.5690594 27.3433685 28.1143951 
            28.882021 29.6461258 30.4065952 31.1633205 31.9161949 32.6651154 33.4099846 
            -10.9883242 -10.2229586 -9.45379829 -8.68095779 -7.9045558 -7.12471485 
            -6.34156084 -5.55522299 -4.76583529 -3.97353315 -3.17845726 -2.38075018 
            -1.58055806 -0.778029799 0.0266829468 0.833425879 1.64204228 2.45237327 
            3.26425791 4.07753325 4.89203453 5.70759535 6.52404928 7.34122658 8.15895844 
            8.97707462 9.79540443 10.6137772 11.4320211 12.2499666 13.0674419 13.8842783 
            14.7003069 15.5153589 16.3292675 17.1418686 17.9529972 18.7624893 19.5701904 
            20.3759365 21.1795769 21.9809551 22.7799244 23.576334 24.370039 25.160902 
            25.948782 26.7335434 27.5150566 28.2931938 29.067831 29.8388462 30.606123 
            31.3695488 32.1290169 32.8844185 33.6356583 -11.1951208 -10.4228907 -9.64675617 
            -8.86683655 -8.08325195 -7.29612732 -6.50559282 -5.71178055 -4.91482687 
            -4.11487293 -3.31206107 -2.50653911 -1.69845688 -0.887967467 -0.0752268359 
            0.739606202 1.55637038 2.37490201 3.19503498 4.01660204 4.83943319 5.66335678 
            6.48820114 7.31379175 8.13995361 8.96651268 9.79329109 10.6201143 11.446805 
            12.2731876 13.0990858 13.924325 14.7487307 15.5721302 16.3943501 17.2152214 
            18.0345745 18.8522434 19.6680622 20.4818687 21.2935028 22.102808 22.9096298 
            23.7138157 24.5152168 25.3136883 26.109087 26.9012775 27.6901245 28.4754944 
            29.2572613 30.0353031 30.8094997 31.5797367 32.3459015 33.1078873 33.865593 
            -11.4059353 -10.6267262 -9.84350204 -9.05638123 -8.26548767 -7.47095108 
            -6.67290258 -5.87147903 -5.06682014 -4.25906992 -3.44837594 -2.63488913 
            -1.81876349 -1.00015676 -0.179229453 0.643854976 1.46893048 2.29582858 
            3.1243782 3.9544065 4.78573847 5.61819792 6.45160627 7.28578472 8.12055302 
            8.95573044 9.79113483 10.626585 11.4618979 12.2968931 13.1313896 13.9652052 
            14.7981615 15.6300793 16.4607811 17.2900925 18.1178379 18.9438457 19.7679462 
            20.5899734 21.4097595 22.2271461 23.0419712 23.8540821 24.6633224 25.4695454 
            26.272604 27.0723572 27.8686676 28.6613979 29.4504204 30.2356091 31.01684 
            31.7939968 32.566967 33.3356361 34.0999069 -11.6208811 -10.8345795 -10.0441437 
            -9.24969769 -8.45136833 -7.64928722 -6.84358883 -6.03441381 -5.22190571 
            -4.40621185 -3.58748436 -2.76587796 -1.94155157 -1.11466706 -0.285389662 
            0.546112299 1.37966776 2.21510315 3.05224228 3.89090681 4.7309165 5.5720892 
            6.41424131 7.25718784 8.10074329 8.94472027 9.7889328 10.6331911 11.4773092 
            12.3210983 13.1643734 14.0069456 14.8486309 15.6892452 16.5286045 17.3665295 
            18.2028389 19.0373554 19.8699055 20.7003174 21.5284195 22.354044 23.1770306 
            23.9972172 24.8144474 25.6285667 26.4394264 27.2468815 28.0507889 28.8510113 
            29.6474152 30.4398708 31.2282543 32.0124474 32.7923279 33.567791 34.338726 
            -11.8400793 -11.046566 -10.2487974 -9.44689941 -8.6410017 -7.83124018 
            -7.01775265 -6.20068216 -5.38017702 -4.55638838 -3.72947216 -2.89958763 
            -2.06689835 -1.23157072 -0.393774956 0.446315616 1.28852487 2.13267374 
            2.97858071 3.82606173 4.67493105 5.52500105 6.37608147 7.22798252 8.08051205 
            8.93347645 9.78668308 10.6399384 11.4930487 12.3458195 13.1980581 14.0495729 
            14.9001722 15.7496653 16.5978642 17.444582 18.2896328 19.1328335 19.9740047 
            20.8129711 21.6495533 22.4835835 23.3148899 24.1433105 24.9686832 25.7908497 
            26.6096554 27.4249535 28.2365952 29.0444431 29.8483562 30.6482048 31.4438629 
            32.2352028 33.02211 33.8044701 34.5821762 -12.0636539 -11.2628078 -10.4575806 
            -9.64810085 -8.83450127 -8.01692009 -7.19549942 -6.3703866 -5.54173231 
            -4.70969296 -3.87442875 -3.03610301 -2.19488382 -1.35094297 -0.504455626 
            0.344399869 1.19544184 2.04848576 2.90334439 3.75982809 4.61774492 5.47690153 
            6.33710146 7.19814873 8.05984402 8.92199039 9.78438568 10.6468315 11.5091267 
            12.3710718 13.2324686 14.0931168 14.9528198 15.8113804 16.6686058 17.5242996 
            18.3782749 19.230341 20.0803127 20.9280071 21.773243 22.6158447 23.4556389 
            24.2924538 25.1261253 25.9564915 26.7833958 27.6066799 28.426199 29.2418079 
            30.0533638 30.860733 31.6637859 32.4623947 33.256443 34.0458069 34.8303833 
            -12.2917328 -11.4834309 -10.6706171 -9.85342216 -9.03198242 -8.20643997 
            -7.3769393 -6.54363203 -5.70667362 -4.86622381 -4.02244711 -3.17551208 
            -2.32559156 -1.47286248 -0.617504835 0.240297154 1.10035646 1.96248269 
            2.82648277 3.69216108 4.5593195 5.42775774 6.29727459 7.16766596 8.03872776 
            8.91025352 9.78203773 10.6538734 11.5255547 12.3968744 13.2676268 14.1376057 
            15.006609 15.8744326 16.7408752 17.6057396 18.4688263 19.3299427 20.1888981 
            21.0455017 21.8995667 22.7509136 23.5993633 24.4447403 25.2868748 26.1255989 
            26.9607525 27.7921753 28.6197147 29.443224 30.262558 31.0775795 31.8881531 
            32.6941528 33.4954529 34.2919388 35.0834923 -12.5244503 -11.7085667 -10.8880348 
            -10.0629892 -9.23356915 -8.39991856 -7.56218719 -6.72053003 -5.87510729 
            -5.02608204 -4.17362452 -3.31790733 -2.45910883 -1.5974108 -0.732999146 
            0.133936688 1.00320351 1.8746053 2.74794245 3.6230135 4.49961329 5.37753582 
            6.25657225 7.13651276 8.01714611 8.89825821 9.77963829 10.6610718 11.542345 
            12.4232445 13.3035574 14.1830721 15.0615778 15.9388647 16.8147259 17.6889553 
            18.5613499 19.4317093 20.2998352 21.1655331 22.0286102 22.8888817 23.7461624 
            24.6002712 25.4510345 26.2982788 27.14184 27.981554 28.8172626 29.6488171 
            30.4760685 31.2988739 32.1170998 32.9306107 33.7392807 34.5429955 35.3416367 
            -12.7619457 -11.9383516 -11.1099682 -10.2769318 -9.43938541 -8.59747791 
            -7.75136137 -6.90119505 -6.04714298 -5.18937397 -4.32806158 -3.46338463 
            -2.59552622 -1.72467351 -0.851018071 0.0252445843 0.903915405 1.78479183 
            2.66766834 3.55233622 4.43858433 5.32619953 6.2149663 7.10466719 7.99508381 
            8.88599682 9.77718544 10.6684294 11.5595083 12.4502001 13.3402863 14.2295475 
            15.1177654 16.0047245 16.8902092 17.7740078 18.6559086 19.5357094 20.4132004 
            21.2881832 22.1604614 23.0298424 23.8961315 24.7591496 25.6187115 26.4746437 
            27.3267746 28.1749363 29.0189667 29.8587132 30.6940231 31.5247498 32.3507538 
            33.1719055 33.9880714 34.7991295 35.6049652 -13.0043621 -12.1729259 -11.3365536 
            -10.4953852 -9.6495657 -8.79924679 -7.94458628 -7.08574677 -6.22289658 
            -5.35620975 -4.48586416 -3.61204457 -2.73493838 -1.85473943 -0.971644878 
            -0.085856244 0.802421033 1.69297802 2.58560228 3.48007846 4.37618828 
            5.27371168 6.17242527 7.07210541 7.9725256 8.87345886 9.77467728 10.6759529 
            11.5770578 12.4777632 13.377841 14.2770662 15.1752129 16.0720577 16.9673767 
            17.8609543 18.752573 19.6420155 20.5290737 21.4135418 22.2952137 23.1738911 
            24.0493774 24.9214821 25.7900219 26.6548119 27.5156784 28.3724499 29.2249584 
            30.0730476 30.9165592 31.7553482 32.5892715 33.4181862 34.2419662 35.0604897 
            35.8736305 -13.2518501 -12.4124384 -11.5679379 -10.7184906 -9.86424541 
            -9.0053587 -8.14199066 -7.27431011 -6.40248823 -5.52670479 -4.64714241 
            -3.76399112 -2.87744451 -1.98770177 -1.09496641 -0.199446321 0.698646486 
            1.5990963 2.50168371 3.40618634 4.31237888 5.22003269 6.12891817 7.03880358 
            7.94945383 8.86063576 9.77211189 10.6836481 11.5950069 12.5059528 13.4162493 
            14.3256636 15.233963 16.1409149 17.0462894 17.9498634 18.8514099 19.7507076 
            20.647541 21.5416946 22.4329605 23.3211308 24.2060032 25.0873833 25.9650803 
            26.8389053 27.7086792 28.5742245 29.4353714 30.2919579 31.1438236 31.9908161 
            32.8327904 33.6696053 34.5011253 35.3272285 36.147789 -13.5045662 -12.6570425 
            -11.8042688 -10.946394 -10.0835676 -9.21595192 -8.34370995 -7.46701479 
            -6.58604336 -5.70097876 -4.81201077 -3.91933346 -3.02314734 -2.12365746 
            -1.22107339 -0.315609783 0.592514396 1.50307643 2.41584969 3.33060408 
            4.24710703 5.16512203 6.08441162 7.00473547 7.92585135 8.84751701 9.76948833 
            10.6915207 11.613369 12.53479 13.4555407 14.3753777 15.2940598 16.2113476 
            17.1270065 18.0407982 18.9524956 19.861866 20.7686882 21.672739 22.5738029 
            23.4716663 24.3661232 25.2569714 26.1440105 27.0270519 27.9059086 28.7803993 
            29.6503487 30.5155888 31.3759594 32.2313042 33.0814705 33.9263153 34.7657051 
            35.5995102 36.4276047 -13.7626715 -12.9068956 -12.0457039 -11.1792479 
            -10.307683 -9.43117142 -8.54988384 -7.6639967 -6.77369165 -5.87915754 
            -4.98058891 -4.07818604 -3.17215514 -2.26270771 -1.35006046 -0.434434593 
            0.48394388 1.40484476 2.32803369 3.25327325 4.18032217 5.10893679 6.03887033 
            6.96987486 7.90169954 8.83409309 9.76680279 10.6995754 11.6321592 12.5642996 
            13.4957457 14.4262457 15.3555508 16.2834129 17.2095871 18.133831 19.0559063 
            19.9755745 20.8926067 21.8067703 22.7178459 23.6256104 24.5298538 25.4303646 
            26.3269405 27.2193851 28.1075039 28.9911137 29.8700352 30.7440929 31.6131248 
            32.4769669 33.3354683 34.1884842 35.0358734 35.8775024 36.7132492 -14.0263357 
            -13.1621647 -12.2924051 -11.4172115 -10.5367441 -9.65116882 -8.76065922 
            -7.86539793 -6.96557045 -6.0613718 -5.15300179 -4.24066734 -3.32458019 
            -2.40495896 -1.48202693 -0.55601269 0.372850329 1.30432427 2.23816705 
            3.17413259 4.11197186 5.05143213 5.99225855 6.93419361 7.8769784 8.82035255 
            9.7640543 10.7078209 11.651392 12.5945044 13.5368967 14.4783096 15.4184847 
            16.3571663 17.2940998 18.2290344 19.1617241 20.0919228 21.0193901 21.9438934 
            22.8651981 23.7830791 24.6973171 25.6076946 26.5140057 27.4160423 28.313612 
            29.2065201 30.0945835 30.9776268 31.8554783 32.7279739 33.5949593 34.4562798 
            35.3118019 36.1613808 37.0048981 -14.2957344 -13.4230223 -12.5445423 
            -11.6604519 -10.7709141 -9.87610054 -8.97618866 -8.07136536 -7.16182137 
            -6.24775791 -5.32938051 -4.40690184 -3.48054051 -2.55052185 -1.6170764 
            -0.680440366 0.2591452 1.20143437 2.14617658 3.09311771 4.04199934 4.99256039 
            5.94453716 6.89766216 7.85166788 8.80628395 9.76124001 10.7162638 11.6710835 
            12.6254282 13.5790272 14.5316114 15.482913 16.4326687 17.3806114 18.3264847 
            19.2700329 20.2110004 21.1491432 22.0842133 23.015974 23.9441929 24.8686409 
            25.7890949 26.7053413 27.6171703 28.5243797 29.4267712 30.3241558 31.2163544 
            32.1031876 32.9844933 33.8601074 34.7298813 35.5936661 36.4513283 37.3027344 
            -14.5710497 -13.6896477 -12.8022909 -11.9091406 -11.0103617 -10.1061316 
            -9.19663143 -8.28205299 -7.36259413 -6.4384594 -5.50986147 -4.57701969 
            -3.64015913 -2.69951224 -1.75531745 -0.807818294 0.142735824 1.09609056 
            2.05198693 3.01016164 3.97034717 4.93227339 5.8956666 6.86025047 7.82574701 
            8.79187679 9.758358 10.7249098 11.6912498 12.6570978 13.6221733 14.5861959 
            15.5488901 16.5099792 17.4691944 18.4262619 19.3809204 20.3329067 21.2819653 
            22.2278442 23.1702938 24.1090775 25.0439568 25.9747047 26.9010983 27.8229218 
            28.7399654 29.652029 30.5589161 31.4604435 32.3564301 33.2467041 34.1311035 
            35.0094719 35.8816605 36.7475281 37.6069489 -14.8524723 -13.9622288 -13.0658369 
            -12.1634569 -11.2552624 -10.3414326 -9.42215443 -8.49762344 -7.56804323 
            -6.63362503 -5.69458771 -4.75115681 -3.80356503 -2.85205197 -1.8968637 
            -0.938252091 0.0235250238 0.988204479 1.95551825 2.92519379 3.89695406 
            4.87051916 5.84560537 6.82192612 7.79919338 8.77711678 9.75540543 10.7337666 
            11.7119093 12.6895409 13.6663704 14.6421099 15.6164713 16.5891685 17.5599213 
            18.52845 19.494482 20.4577427 21.4179707 22.3749008 23.3282833 24.2778664 
            25.2234077 26.164669 27.1014252 28.0334511 28.9605331 29.8824615 30.7990398 
            31.7100754 32.6153831 33.5147934 34.4081306 35.2952385 36.175972 37.0501823 
            37.9177361 -15.1402006 -14.240962 -13.3353691 -12.4235907 -11.5058002 
            -10.5821829 -9.65293026 -8.7182436 -7.77833176 -6.83341169 -5.88370895 
            -4.92945623 -3.97089338 -3.00826788 -2.04183412 -1.07185221 -0.0985889807 
            0.877683401 1.85668731 2.83814049 3.82175589 4.80724335 5.79430866 6.78265476 
            7.77198267 8.7619915 9.75237942 10.7428427 11.733079 12.722785 13.7116594 
            14.6994028 15.6857157 16.6703033 17.652874 18.6331387 19.6108112 20.5856133 
            21.5572701 22.5255108 23.4900723 24.4506989 25.4071369 26.3591442 27.3064842 
            28.2489281 29.1862526 30.118248 31.0447083 31.965435 32.8802414 33.7889481 
            34.6913872 35.5873871 36.4768066 37.3594894 38.2353096 -15.4344416 -14.5260487 
            -13.6110907 -12.6897373 -11.7621679 -10.8285704 -9.88914204 -8.94409084 
            -7.99362898 -7.03798199 -6.07738113 -5.11206627 -4.14228535 -3.16829348 
            -2.19035363 -1.20873475 -0.223712966 0.764429927 1.75540638 2.74892402 
            3.74468517 4.7423892 5.74173021 6.74240112 7.74409151 8.74648857 9.74927807 
            10.7521467 11.7547789 12.7568617 13.7580814 14.7581263 15.7566862 16.753458 
            17.7481346 18.7404175 19.7300129 20.7166309 21.6999874 22.6798 23.6557999 
            24.627718 25.5952969 26.5582867 27.5164394 28.4695225 29.4173069 30.3595734 
            31.2961102 32.2267189 33.1512032 34.0693817 34.9810753 35.8861237 36.7843704 
            37.6756668 38.5598755 -15.7354097 -14.8177023 -13.8932085 -12.962101 
            -12.0245638 -11.0807896 -10.1309805 -9.17534828 -8.21411419 -7.24750805 
            -6.27576876 -5.29914379 -4.31788921 -3.33226848 -2.3425529 -1.3490212 
            -0.35195896 0.648341954 1.65158367 2.65746307 3.66567159 4.67589664 5.68782234 
            6.70112848 7.71549273 8.73059082 9.74609756 10.7616863 11.777029 12.7918015 
            13.8056774 14.8183327 15.8294477 16.8387051 17.845787 18.8503857 19.8521957 
            20.850914 21.8462467 22.8379059 23.8256073 24.8090782 25.7880516 26.7622643 
            27.7314682 28.6954174 29.6538792 30.6066265 31.5534439 32.4941254 33.4284706 
            34.3562927 35.2774162 36.1916656 37.0988884 37.9989357 38.8916588 -16.0433311 
            -15.1161451 -14.181941 -13.2408962 -12.2931986 -11.3390446 -10.3786421 
            -9.41220951 -8.43997192 -7.46216822 -6.47904348 -5.49085283 -4.49786091 
            -3.50033927 -2.49856949 -1.49283934 -0.483444631 0.529312313 1.54512274 
            2.56367207 3.5846405 4.60770369 5.63253307 6.65879679 7.68616009 8.71428585 
            9.742836 10.771471 11.7998514 12.8276377 13.8544931 14.8800812 15.9040689 
            16.9261265 17.9459248 18.9631443 19.9774666 20.9885807 21.9961815 22.9999676 
            23.999649 24.9949398 25.9855652 26.9712543 27.9517517 28.9268017 29.8961658 
            30.8596115 31.8169155 32.767868 33.7122612 34.64991 35.5806274 36.5042381 
            37.4205894 38.3295212 39.230896 -16.3584385 -15.421607 -14.4775162 -13.5263472 
            -12.5682907 -11.60355 -10.6323376 -9.65487576 -8.67139912 -7.68215084 
            -6.68738508 -5.68736506 -4.68236256 -3.67266011 -2.6585474 -1.64032328 
            -0.618293583 0.407228172 1.43592179 2.46746111 3.5015142 4.53774405 5.57580948 
            6.61536551 7.65606451 8.6975565 9.73948956 10.7815104 11.823267 12.8644056 
            13.9045773 14.9434309 15.9806223 17.0158062 18.0486431 19.0788021 20.1059494 
            21.1297646 22.149931 23.1661358 24.1780815 25.1854687 26.188015 27.185442 
            28.1774807 29.1638737 30.1443729 31.1187382 32.0867424 33.0481682 34.0028038 
            34.9504585 35.8909416 36.8240776 37.7497063 38.6676674 39.5778236 -16.6809769 
            -15.7343292 -14.7801714 -13.8186855 -12.850069 -11.8745289 -10.8922825 
            -9.90355873 -8.9085989 -7.90765333 -6.90098286 -5.88886023 -4.8715663 
            -3.84939218 -2.82263851 -1.79161382 -0.756635666 0.281971127 1.32387447 
            2.36873555 3.41621017 4.46594763 5.51759434 6.57079077 7.62517643 8.68038559 
            9.73605442 10.7918139 11.8472996 12.9021425 13.9559784 15.0084457 16.0591812 
            17.107832 18.1540432 19.1974678 20.2377644 21.2745991 22.3076401 23.3365688 
            24.3610706 25.3808422 26.395586 27.4050159 28.4088573 29.4068432 30.398716 
            31.3842297 32.3631516 33.3352547 34.3003311 35.2581787 36.2086029 37.1514282 
            38.0864868 39.0136261 39.9326935 -17.0112019 -16.0545654 -15.0901546 
            -14.1181583 -13.1387739 -12.152216 -11.1587057 -10.1584806 -9.15178585 
            -8.13888168 -7.12003517 -6.09552813 -5.06565142 -4.03070545 -2.99100161 
            -1.94685924 -0.898607612 0.153416455 1.20886827 2.26739621 3.32864189 
            4.39224243 5.45782852 6.52502728 7.59346294 8.66275692 9.73252773 10.8023939 
            11.871974 12.9408855 14.00875 15.0751896 16.1398296 17.2022972 18.2622299 
            19.3192635 20.373045 21.4232254 22.4694653 23.5114288 24.5487938 25.5812435 
            26.6084709 27.6301842 28.6460934 29.6559258 30.6594181 31.6563148 32.6463776 
            33.6293755 34.6050911 35.5733223 36.5338669 37.4865494 38.4311981 39.3676529 
            40.2957687 -17.3493786 -16.3825779 -15.4077272 -14.4250183 -13.4346561 
            -12.4368563 -11.4318476 -10.4198732 -9.40118599 -8.37605286 -7.34474993 
            -6.30756807 -5.26480722 -4.21677876 -3.16380429 -2.10621548 -1.04435325 
            0.021432871 1.09078491 2.16333747 3.23871875 4.31655025 5.39644909 6.47802639 
            7.56089163 8.64464951 9.72890472 10.8132601 11.897316 12.9806776 14.0629482 
            15.1437349 16.2226486 17.2993011 18.3733158 19.444315 20.5119286 21.5757961 
            22.6355648 23.6908894 24.7414322 25.7868652 26.8268757 27.8611546 28.8894081 
            29.9113522 30.9267159 31.9352379 32.9366722 33.9307823 34.9173431 35.8961487 
            36.8669968 37.8297043 38.7840996 39.7300186 40.6673164 -17.6957874 -16.7186432 
            -15.73316 -14.7395353 -13.737977 -12.7287064 -11.7119579 -10.6879807 
            -9.65703487 -8.6193943 -7.57534599 -6.52518892 -5.46923256 -4.40779972 
            -3.341223 -2.26984668 -1.19402397 -0.114117905 0.969499767 2.05644941 
            3.14634418 4.23879051 5.33338976 6.42973757 7.52742672 8.62604618 9.72518349 
            10.8244238 11.9233541 13.0215597 14.1186295 15.2141542 16.3077259 17.3989468 
            18.4874172 19.5727501 20.6545582 21.7324696 22.8061123 23.8751335 24.9391804 
            25.9979153 27.051012 28.0981522 29.1390343 30.1733608 31.2008572 32.2212524 
            33.2342911 34.2397346 35.2373543 36.2269325 37.2082672 38.1811752 39.1454773 
            40.1010094 41.0476265 -18.0507164 -17.0630474 -16.0667381 -15.0619888 
            -14.0490122 -13.0280352 -11.999299 -10.9630575 -9.91957951 -8.86914635 
            -7.81205368 -6.74861002 -5.67913628 -4.60396576 -3.52344346 -2.43792558 
            -1.34777951 -0.25338167 0.844881475 1.94661522 3.05141711 4.15887737 
            5.26858091 6.3801074 7.49303102 8.60692501 9.7213583 10.8358994 11.9501162 
            13.0635786 14.1758575 15.2865248 16.3951588 17.5013428 18.60466 19.7047081 
            20.8010883 21.8934078 22.981287 24.064352 25.1422424 26.2146053 27.281105 
            28.3414135 29.3952141 30.4422054 31.4820995 32.5146217 33.5395088 34.5565147 
            35.5654068 36.5659599 37.557972 38.541256 39.515625 40.4809227 41.4369926 
            -18.4144726 -17.4160919 -16.4087563 -15.3926706 -14.3680506 -13.3351278 
            -12.2941484 -11.2453737 -10.1890812 -9.12555981 -8.05511379 -6.97806311 
            -5.89473867 -4.80548525 -3.71066093 -2.6106348 -1.50578809 -0.39651221 
            0.716791332 1.83371174 2.95383024 4.07672024 5.20194912 6.32907867 7.45766544 
            8.58726406 9.71742439 10.8476982 11.9776335 13.106782 14.2346964 15.3609304 
            16.4850445 17.6066017 18.725174 19.8403378 20.9516792 22.0587902 23.161274 
            24.2587471 25.3508301 26.4371643 27.5173931 28.5911827 29.658205 30.7181492 
            31.7707176 32.8156281 33.8526115 34.8814125 35.9017944 36.9135323 37.9164124 
            38.9102478 39.8948517 40.87006 41.8357239 -18.7873707 -17.7780933 -16.759531 
            -15.7318907 -14.6953936 -13.6502781 -12.5967941 -11.5352116 -10.4658136 
            -9.3888998 -8.30478287 -7.21379232 -6.11627197 -5.01257801 -3.90308189 
            -2.78816652 -1.66822755 -0.543671906 0.585082769 1.71760905 2.8534708 
            3.9922235 5.13341618 6.2765913 7.42128801 8.56703949 9.71337891 10.8598347 
            12.0059385 13.1512213 14.2952156 15.4374571 16.577486 17.7148495 18.8490982 
            19.9797935 21.1065006 22.2287998 23.3462772 24.4585323 25.5651741 26.6658268 
            27.7601261 28.8477211 29.9282761 31.0014706 32.0669975 33.1245651 34.1738968 
            35.2147331 36.24683 37.2699585 38.283905 39.2884712 40.283474 41.2687454 
            42.2441406 -19.1697464 -18.1493797 -17.1193829 -16.0799694 -15.0313597 
            -13.9737978 -12.9075422 -11.8328676 -10.7500658 -9.65944386 -8.56132698 
            -7.45605421 -6.34398031 -5.22547579 -4.10092402 -2.97072363 -1.83528543 
            -0.695032239 0.449601144 1.5981698 2.75021887 3.9052856 5.06289911 6.22258282 
            7.38385487 8.54622841 9.70921516 10.872324 12.0350657 13.196949 14.3574877 
            15.5161963 16.672596 17.8262119 18.9765778 20.1232357 21.2657337 22.4036331 
            23.5365047 24.6639309 25.7855091 26.9008446 28.0095634 29.1113014 30.2057133 
            31.2924633 32.3712387 33.4417381 34.5036812 35.556797 36.6008415 37.6355705 
            38.660778 39.6762581 40.6818275 41.6773186 42.6625786 -19.5619431 -18.5302963 
            -17.4886589 -16.4372444 -15.3762808 -14.306015 -13.2267113 -12.1386538 
            -11.0421391 -9.93748665 -8.82503033 -7.70511913 -6.57812214 -5.44442225 
            -4.30441761 -3.15852094 -2.00715995 -0.850774586 0.31018275 1.47524834 
            2.64394855 3.81579995 4.99031162 6.16698599 7.34531927 8.52480316 9.7049284 
            10.8851824 12.0650511 13.2440233 14.4215899 15.5972462 16.7704887 17.9408264 
            19.107769 20.2708378 21.4295673 22.5834961 23.7321796 24.8751831 26.012085 
            27.1424828 28.2659836 29.3822117 30.4908104 31.5914345 32.6837578 33.7674751 
            34.8422928 35.9079399 36.9641609 38.0107155 39.0473824 40.0739594 41.0902634 
            42.0961227 43.0913849 -19.9643288 -18.9212074 -17.8677158 -16.8040714 
            -15.7305059 -14.6472721 -13.5546398 -12.452898 -11.3423548 -10.2233372 
            -9.0961895 -7.96127319 -6.8189702 -5.66967583 -4.51380444 -3.35178494 
            -2.18406105 -1.01109087 0.166654289 1.34869111 2.53452516 3.7236526 4.91556072 
            6.10972881 7.30563164 8.502738 9.70051384 10.8984241 12.095932 13.2925034 
            14.4876051 15.6807089 16.8712902 18.058836 19.2428322 20.4227848 21.5982018 
            22.7686081 23.9335365 25.092535 26.2451706 27.3910198 28.5296783 29.6607571 
            30.783884 31.8987064 33.0048866 34.1021118 35.1900826 36.2685127 37.3371506 
            38.3957443 39.4440765 40.4819374 41.5091438 42.5255241 43.5309258 -20.3772812 
            -19.3224888 -18.2569294 -17.1808224 -16.0944042 -14.9979305 -13.8916798 
            -12.7759466 -11.6510477 -10.5173206 -9.37511921 -8.22481823 -7.06681108 
            -5.90150976 -4.72934246 -3.5507555 -2.36621022 -1.17618406 0.0188323129 
            1.21833479 2.42180729 3.62872386 4.83854818 6.0507369 7.26473999 8.4800024 
            9.69596577 10.9120684 12.1277514 13.342454 14.5556183 15.7666941 16.975132 
            18.1803932 19.3819447 20.5792675 21.7718525 22.959198 24.1408234 25.3162575 
            26.4850464 27.6467533 28.8009567 29.9472561 31.0852661 32.2146225 33.33498 
            34.4460106 35.5474091 36.6388855 37.7201805 38.7910423 39.8512421 40.9005775 
            41.938858 42.9659081 43.9815865 -20.8012028 -19.734539 -18.6566963 -17.5678883 
            -16.4683609 -15.3583708 -14.238204 -13.1081638 -11.9685736 -10.8197803 
            -9.66215134 -8.49607182 -7.32194996 -6.14021158 -4.95130301 -3.75568652 
            -2.55384302 -1.34626961 -0.133477718 1.08400643 2.30564427 3.53088546 
            4.75917006 5.98992968 7.22258854 8.45656586 9.69127655 10.9261341 12.1605511 
            13.3939419 14.6257238 15.8553171 17.0821514 18.3056602 19.5252895 20.7404938 
            21.9507408 23.1555119 24.3543034 25.5466251 26.7320061 27.9099903 29.080143 
            30.2420464 31.3953056 32.5395393 33.6743965 34.7995415 35.9146576 37.0194473 
            38.1136475 39.1970024 40.2692833 41.3302765 42.3797951 43.417675 44.4437561 
            -21.2365074 -20.1577778 -19.0674267 -17.9656792 -16.8527794 -15.7289925 
            -14.5946064 -13.4499331 -12.2953062 -11.1310816 -9.95763588 -8.77537155 
            -7.58470774 -6.38608789 -5.1799736 -3.96684718 -2.7472086 -1.52157569 
            -0.290482193 0.945522606 2.18587589 3.43000245 4.67731619 5.92722273 
            7.17911816 8.43239498 9.68644047 10.9406395 12.1943779 13.4470406 14.6980171 
            15.946702 17.1924953 18.4348087 19.6730595 20.9066772 22.1351089 23.357811 
            24.5742569 25.7839375 26.9863644 28.1810627 29.3675804 30.5454865 31.7143707 
            32.8738403 34.0235367 35.163105 36.2922287 37.4106064 38.5179634 39.6140404 
            40.6986084 41.7714539 42.832386 43.881237 44.9178581 -21.6836357 -20.5926361 
            -19.4895592 -18.3746281 -17.2480907 -16.1102161 -14.9612999 -13.8016605 
            -12.6316404 -11.4516048 -10.2619448 -9.06307316 -7.85542583 -6.63946104 
            -5.4156599 -4.18452311 -2.94657135 -1.70234466 -0.452400267 0.802688241 
            2.06233239 3.32593036 4.5928688 5.86252451 7.1342659 8.40745544 9.68145084 
            10.9556074 12.2292805 13.5018253 14.772604 16.0409794 17.306324 18.5680218 
            19.8254623 21.0780525 22.3252087 23.5663662 24.8009758 26.0285091 27.2484531 
            28.4603176 29.6636333 30.8579521 32.0428505 33.217926 34.3828011 35.537117 
            36.6805534 37.8127937 38.9335594 40.0425949 41.1396599 42.2245445 43.2970543 
            44.357029 45.4043198 -22.1430473 -21.0395775 -19.9235497 -18.795187 -17.6547413 
            -16.5024853 -15.3387203 -14.1637726 -12.977993 -11.7817583 -10.575469 
            -9.35955429 -8.13446426 -6.90067482 -5.65868521 -4.40901709 -3.15221214 
            -1.88883412 -0.619464874 0.655296028 1.93483305 3.21851635 4.50570297 
            5.79574013 7.08796501 8.38171005 9.67630005 10.9710588 12.2653103 13.5583792 
            14.8495932 16.1382885 17.4238033 18.7054939 19.9827194 21.2548618 22.5213089 
            23.7814713 25.0347767 26.280674 27.5186272 28.748127 29.9686871 31.1798439 
            32.3811569 33.5722122 34.7526245 35.92202 37.0800705 38.2264595 39.3608932 
            40.48312 41.5928955 42.6900101 43.7742691 44.8455124 45.903595 -22.6152229 
            -21.4990826 -20.3698769 -19.2278347 -18.073204 -16.9062672 -15.7273293 
            -14.5367212 -13.3348055 -12.1219683 -10.8986235 -9.66521358 -8.42220592 
            -7.17009258 -5.90939331 -4.64065027 -3.36442924 -2.0813179 -0.791923881 
            0.50312531 1.80318558 3.10759664 4.41568518 5.72676611 7.04014444 8.3551178 
            9.6709795 10.9870186 12.3025246 13.6167879 14.9291048 16.2387753 17.5451107 
            18.8474293 20.1450672 21.4373665 22.7236977 24.0034389 25.2759933 26.5407829 
            27.7972546 29.0448799 30.2831478 31.5115833 32.7297287 33.9371529 35.133461 
            36.3182793 37.4912567 38.6520767 39.8004456 40.9361 42.0587997 43.1683311 
            44.2645073 45.3471603 46.4161568 -23.1006699 -21.9716568 -20.8290482 
            -19.6730709 -18.5039806 -17.3220558 -16.1276112 -14.9209833 -13.7025442 
            -12.4726906 -11.2318487 -9.98047638 -8.71905613 -7.44810057 -6.16814899 
            -4.87976551 -3.5835402 -2.28008699 -0.970041156 0.345941067 1.66718471 
            2.99299788 4.3226738 5.65549374 6.99072742 8.32763767 9.66548061 11.0035105 
            12.3409805 13.677145 15.0112638 16.3426018 17.6704369 18.994051 20.3127499 
            21.6258469 22.9326782 24.2325954 25.5249748 26.8092136 28.0847378 29.3509903 
            30.6074486 31.8536148 33.0890198 34.3132172 35.5257988 36.7263794 37.9146042 
            39.0901489 40.2527161 41.4020386 42.5378761 43.6600151 44.7682686 45.8624725 
            46.9425011 -23.5999146 -22.4578304 -21.3015938 -20.1314278 -18.9475918 
            -17.75037 -16.5400791 -15.3170624 -14.0817022 -12.834404 -11.5756102 
            -10.3057899 -9.02544689 -7.73510933 -6.43533993 -5.12672615 -3.80988312 
            -2.48545218 -1.15409791 0.183492616 1.5266118 2.87453389 4.2265172 5.58180571 
            6.93963337 8.2992239 9.65979576 11.0205641 12.380743 13.7395496 15.0962038 
            16.4499359 17.7999821 19.1455936 20.4860382 21.8205986 23.1485748 24.4692936 
            25.7821007 27.0863686 28.3814926 29.6669006 30.9420471 32.2064171 33.4595184 
            34.700901 35.9301376 37.1468353 38.3506355 39.5412025 40.718235 41.8814659 
            43.0306549 44.1655846 45.2860756 46.3919716 47.483139 -24.1135159 -22.9581623 
            -21.7880688 -20.6034622 -19.4045963 -18.191761 -16.9652748 -15.7254925 
            -14.4728012 -13.2076197 -11.9304018 -10.641634 -9.34183502 -8.03155613 
            -6.71138 -5.38191986 -4.04381847 -2.69774437 -1.34439421 0.0155124022 
            1.38123333 2.75200653 4.12705278 5.50557756 6.88677454 8.26982784 9.6539135 
            11.0382071 12.4218798 13.8041067 15.1840696 16.560955 17.9339638 19.3023071 
            20.6652145 22.0219345 23.3717346 24.7139072 26.0477715 27.3726673 28.6879692 
            29.9930801 31.2874298 32.5704842 33.8417435 35.1007347 36.347023 37.580204 
            38.7999039 40.0057945 41.1975632 42.3749466 43.537693 44.6856003 45.8184891 
            46.9361992 48.0386162 -24.6420555 -23.4732399 -22.2890663 -21.0897598 
            -19.875576 -18.6468048 -17.4037724 -16.1468391 -14.8763962 -13.5928774 
            -12.2967491 -10.9885139 -9.66870785 -8.33790398 -6.99670887 -5.64576054 
            -4.28572989 -2.91731691 -1.54125059 -0.158285454 1.23079944 2.62520385 
            4.02410793 5.42667627 6.83205938 8.239398 9.64782524 11.0564699 12.4644623 
            13.8709307 15.275013 16.6758556 18.0726128 19.4644585 20.8505821 22.2301941 
            23.6025257 24.9668369 26.3224125 27.6685658 29.0046444 30.3300228 31.6441116 
            32.9463577 34.2362442 35.513279 36.7770195 38.02705 39.2629929 40.4845085 
            41.691288 42.8830605 44.0595779 45.2206459 46.3660774 47.4957314 48.6094894 
            -25.1861496 -24.0036774 -22.8052006 -21.5909386 -20.3611469 -19.1161175 
            -17.8561802 -16.5816975 -15.2930737 -13.9907513 -12.67521 -11.3469687 
            -10.0065842 -8.65464973 -7.29179573 -5.9186883 -4.53602791 -3.14454746 
            -1.74500966 -0.338206768 1.07504308 2.49389839 3.91749668 5.34495783 
            6.77538729 8.20787907 9.64151859 11.075388 12.5085678 13.9401417 15.3691998 
            16.7948399 18.216177 19.6323357 21.0424652 22.4457359 23.8413429 25.228508 
            26.6064816 27.9745464 29.3320217 30.6782589 32.0126419 33.3346024 34.6435966 
            35.9391251 37.2207336 38.4879913 39.7405167 40.9779663 42.2000275 43.4064255 
            44.5969276 45.7713242 46.9294472 48.0711594 49.1963539 -25.7464428 -24.550127 
            -23.3371258 -22.1076527 -20.8619633 -19.6003475 -18.3231373 -17.0307026 
            -15.7234564 -14.4018497 -13.0663776 -11.7175741 -10.3560171 -8.98231983 
            -7.59714174 -6.20117474 -4.79515171 -3.37983966 -1.95603824 -0.524579048 
            0.913677931 2.35784721 3.80702019 5.26026964 6.71665192 8.17521095 9.63498116 
            11.0949945 12.5542812 14.0118713 15.4668055 16.9181347 18.3649197 19.8062458 
            21.2412128 22.6689491 24.0886078 25.4993725 26.9004612 28.2911243 29.6706448 
            31.038353 32.3936081 33.7358131 35.0644188 36.3789024 37.6787987 38.9636688 
            40.2331276 41.4868164 42.7244339 43.9457016 45.150383 46.3382835 47.5092354 
            48.6631126 49.7998161 -26.3236084 -25.1132717 -23.8855286 -22.6405926 
            -21.3787117 -20.1001778 -18.8053246 -17.4945278 -16.1682053 -14.8268213 
            -13.4708824 -12.1009417 -10.7175941 -9.3214798 -7.91328144 -6.49372339 
            -5.06357098 -3.62362623 -2.17472935 -0.71775347 0.746396661 2.21678853 
            3.69246483 5.17244673 6.65573835 8.14132977 9.62820148 11.1153307 12.6016903 
            14.0862589 15.5680208 17.0459728 18.5191288 19.986517 21.4471951 22.9002438 
            24.3447704 25.7799225 27.2048759 28.6188469 30.0210915 31.4109039 32.7876282 
            34.1506386 35.4993668 36.8332787 38.1518936 39.4547691 40.7415047 42.0117531 
            43.2651939 44.501564 45.7206268 46.9221954 48.1061058 49.2722473 50.4205284 
            -26.9183598 -25.6938267 -24.4511318 -23.1904812 -21.9121189 -20.6163349 
            -19.303463 -17.9738846 -16.6280231 -15.2663546 -13.8893976 -12.4977226 
            -11.0919456 -9.67273045 -8.24078751 -6.79687357 -5.34178734 -3.87637067 
            -2.40150428 -0.918106914 0.572869599 2.0704422 3.57360077 5.0813117 6.5925231 
            8.10616684 9.62116528 11.1364355 12.6508923 14.1634541 15.6730471 17.1786137 
            18.6791058 20.1735058 21.6608124 23.1400623 24.6103153 26.0706749 27.5202789 
            28.9583035 30.3839741 31.7965565 33.1953621 34.5797539 35.9491348 37.3029594 
            38.6407356 39.9620132 41.2663841 42.5534973 43.8230362 45.0747375 46.3083763 
            47.5237617 48.7207565 49.8992462 51.0591621 -27.5314465 -26.292551 -25.0347004 
            -23.7580872 -22.4629536 -21.1495857 -19.8183174 -18.469532 -17.1036587 
            -15.7211838 -14.3226395 -12.9086132 -11.4797421 -10.0367155 -8.58027267 
            -7.11120272 -5.63034105 -4.13857079 -2.6368165 -1.12604451 0.392741859 
            1.91850591 3.45018077 4.98667431 6.52687359 8.06964874 9.61385822 11.1583548 
            12.7019901 14.243619 15.7821054 17.316328 18.8451824 20.36759 21.8824959 
            23.3888817 24.8857632 26.3721924 27.8472652 29.3101234 30.7599545 32.1959915 
            33.6175232 35.0238838 36.414463 37.7887001 39.1460876 40.4861679 41.8085289 
            43.1128197 44.3987236 45.6659851 46.9143791 48.143734 49.3539162 50.5448265 
            51.7164116 -28.1636505 -26.9102402 -25.6370354 -24.344223 -23.032032 
            -21.7007465 -20.3506985 -18.9822731 -17.5959053 -16.1920891 -14.7713718 
            -13.3343573 -11.8817034 -10.4141264 -8.93239403 -7.43733072 -5.92981148 
            -4.41076088 -2.88115239 -1.34200239 0.205631539 1.76065445 3.32193875 
            4.88832903 6.4586463 8.03169441 9.60626221 11.1811361 12.7550955 14.3269291 
            15.8954315 17.4594135 19.0177116 20.5691776 22.1127052 23.6472149 25.1716671 
            26.6850719 28.1864758 29.6749783 31.1497326 32.6099434 34.054863 35.4838066 
            36.8961449 38.2913017 39.6687584 41.0280457 42.3687553 43.6905327 44.9930687 
            46.276104 47.5394287 48.7828865 50.0063477 51.2097397 52.3930168 -28.8157978 
            -27.5477333 -26.2589893 -24.9497414 -23.6202126 -22.2706776 -20.9014664 
            -19.5129642 -18.1056099 -16.6799049 -15.236412 -13.7757492 -12.2985983 
            -10.8056993 -9.29785442 -7.77592278 -6.24081993 -4.69351721 -3.13503671 
            -1.56645 0.0111267539 1.59653676 3.18858695 4.78605366 6.38768673 7.99221754 
            9.59836292 11.2048311 12.8103304 14.4135714 16.013279 17.6081924 19.197073 
            20.7787132 22.3519382 23.9156075 25.4686317 27.0099583 28.5385933 30.0535927 
            31.5540676 33.0391884 34.5081863 35.9603462 37.3950195 38.8116112 40.2095985 
            41.5885086 42.9479256 44.2874947 45.6069145 46.9059372 48.1843605 49.4420357 
            50.6788597 51.8947678 53.0897446 -29.48876 -28.2059116 -26.9014549 -25.5755501 
            -24.2284088 -22.8602962 -21.4715366 -20.0625153 -18.6336727 -17.1855221 
            -15.7186317 -14.2336397 -12.7312498 -11.2122288 -9.67741203 -8.12769508 
            -6.5640378 -4.98745918 -3.39903498 -1.79989469 -0.191217244 1.42577362 
            3.0498147 4.67960787 6.31382751 7.95112562 9.59013939 11.229496 12.8678236 
            14.5037518 16.1359253 17.7630062 19.3836823 20.9966717 22.6007309 24.1946583 
            25.777298 27.3475475 28.9043579 30.4467411 31.9737682 33.4845734 34.9783554 
            36.45438 37.9119759 39.3505402 40.7695312 42.1684761 43.5469551 44.9046173 
            46.2411728 47.5563774 48.8500443 50.1220436 51.3722916 52.6007385 53.8073959 
            -30.1834469 -28.8857059 -27.5653782 -26.2226048 -24.857584 -23.4705715 
            -22.0618801 -20.6318951 -19.1810589 -17.7098885 -16.2189636 -14.7089396 
            -13.180542 -11.6345663 -10.0718794 -8.49341774 -6.90018654 -5.29325533 
            -3.67375731 -2.04288387 -0.401881367 1.24795485 2.90528512 4.56873226 
            6.23688698 7.90831709 9.58157158 11.2551928 12.9277172 14.5976896 16.2636681 
            17.9242306 19.5779839 21.2235699 22.8596668 24.4850044 26.0983639 27.6985836 
            29.2845592 30.8552551 32.4096985 33.946991 35.4662933 36.9668541 38.447979 
            39.9090538 41.3495216 42.7689133 44.1668091 45.5428619 46.8967857 48.2283592 
            49.5374069 50.8238182 52.0875244 53.3285103 54.5468063 -30.9008179 -29.5880966 
            -28.2517567 -26.8919182 -25.5087624 -24.1025314 -22.6735306 -21.2221355 
            -19.7487926 -18.2540169 -16.7384052 -15.2026253 -13.6474237 -12.0736256 
            -10.482132 -8.87392139 -7.2500453 -5.61162853 -3.95986414 -2.29601073 
            -0.621386409 1.06263566 2.7546339 4.45314455 6.15666866 7.86368179 9.57263947 
            11.2819853 12.9901648 14.6956253 16.3968315 18.0922718 19.7804623 21.4599609 
            23.1293678 24.7873383 26.4325809 28.0638733 29.6800518 31.2800312 32.8627968 
            34.4274025 35.9729919 37.4987755 39.0040474 40.4881783 41.9506073 43.3908577 
            44.8085136 46.2032433 47.5747643 48.9228745 50.2474174 51.5483017 52.8254852 
            54.0789833 55.3088455 -31.6418839 -30.3141155 -28.9616413 -27.5845585 
            -26.1830292 -24.7572727 -23.3075886 -21.8343391 -20.3379688 -18.8189983 
            -17.2780285 -15.715745 -14.1329165 -12.5303936 -10.9091148 -9.27010155 
            -7.61445618 -5.94335985 -4.25807047 -2.55991769 -0.850297451 0.869333446 
            2.59746432 4.33253813 6.07295895 7.81710052 9.56331635 11.309947 13.0553331 
            14.7978191 16.5357685 18.2675667 19.9916401 21.7064514 23.4105167 25.1024075 
            26.7807617 28.4442863 30.0917587 31.7220364 33.3340607 34.9268494 36.4995041 
            38.0512238 39.5812721 41.0890121 42.5738831 44.0354004 45.4731636 46.886837 
            48.2761688 49.6409607 50.9810905 52.2964897 53.5871429 54.8530922 56.094429 
            -32.4077034 -31.0648479 -29.6961441 -28.3016605 -26.8815289 -25.435957 
            -23.9652214 -22.469677 -20.9497585 -19.4059906 -17.8389797 -16.2494259 
            -14.6381149 -13.0059309 -11.3538475 -9.68292809 -7.99433041 -6.28929567 
            -4.56915092 -2.83530211 -1.08922815 0.667523444 2.43334579 4.20658016 
            5.98552418 7.76844311 9.55357742 11.3391562 13.1234035 14.9045544 16.6808586 
            18.4505959 20.2120876 21.9636974 23.7038479 25.4310265 27.1437874 28.8407631 
            30.5206718 32.182312 33.8245735 35.4464378 37.0469742 38.625351 40.1808205 
            41.7127342 43.2205238 44.7037163 46.1619072 47.5947876 49.0021172 50.3837242 
            51.7395096 53.0694313 54.3735123 55.6518288 56.9044991 -33.1993904 -31.8414421 
            -30.4564381 -29.0444183 -27.605484 -26.1398182 -24.6476765 -23.1294003 
            -21.5854149 -20.0162411 -18.4224911 -16.8048763 -15.1642036 -13.5013838 
            -11.8174286 -10.1134491 -8.39065552 -6.65035534 -4.89394855 -3.12292242 
            -1.33884668 0.456634015 2.26180816 4.07490635 5.89411068 7.71756744 9.54339504 
            11.3696966 13.1945753 15.01614 16.8325214 18.6418819 20.4424267 22.2324142 
            24.0101662 25.7740746 27.5226078 29.254324 30.9678688 32.6619797 34.3355026 
            35.9873657 37.6166191 39.2223969 40.8039398 42.3605919 43.8917809 45.3970375 
            46.8759804 48.3283043 49.7537994 51.1523209 52.5237961 53.8682251 55.1856575 
            56.4762154 57.7400551 -34.018116 -32.6450996 -31.243763 -29.8141003 -28.3561859 
            -26.8701687 -25.3562813 -23.814846 -22.2462769 -20.6510849 -19.0298862 
            -17.3834 -15.7124548 -14.0179892 -12.3010502 -10.5627995 -8.80450249 
            -7.02753687 -5.23337889 -3.42360473 -1.59988117 0.236041501 2.08233833 
            3.93711948 5.79844141 7.66431904 9.53273678 11.4016628 13.2690639 15.1329136 
            16.9912109 18.8419895 20.6833324 22.5133801 24.3303413 26.1325111 27.9182625 
            29.6860733 31.4345131 33.1622581 34.8680992 36.55093 38.2097549 39.8436928 
            41.451973 43.0339241 44.5889854 46.1166916 47.6166763 49.0886688 50.5324707 
            51.9479713 53.335144 54.6940193 56.0246925 57.3273239 58.6021194 -34.8651047 
            -33.4770927 -32.0594215 -30.6120472 -29.135004 -27.6284046 -26.0924511 
            -24.5274429 -22.9337749 -21.3119526 -19.6625843 -17.9864006 -16.2842464 
            -14.557085 -12.8060045 -11.0322113 -9.23703671 -7.42192602 -5.5884409 
            -3.73825073 -1.87312746 0.00506407721 1.89437532 3.79278493 5.69821167 
            7.60852718 9.52156925 11.4351568 13.3471069 15.2552462 17.1574287 19.0515461 
            20.935545 22.8074417 24.6653252 26.5073776 28.3318787 30.1372089 31.9218674 
            33.6844635 35.4237251 37.1385117 38.8277969 40.4906693 42.1263466 43.7341614 
            45.3135567 46.8640823 48.3853874 49.8772278 51.339447 52.7719688 54.1748009 
            55.5480232 56.891777 58.2062759 59.4917717 -35.7416534 -34.3387566 -32.9047966 
            -31.4396782 -29.9433918 -28.416008 -26.8576946 -25.2687168 -23.6494503 
            -22.0003815 -20.3221207 -18.6153946 -16.8810654 -15.120122 -13.3336897 
            -11.5230265 -9.6895256 -7.83470821 -5.96022463 -4.06784534 -2.15945601 
            -0.237045154 1.69730365 3.64142561 5.59308815 7.55000544 9.50985432 11.4702902 
            13.4289656 15.383544 17.3317184 19.2712288 21.1998749 23.11553 25.0161572 
            26.8998165 28.7646809 30.6090393 32.4313049 34.2300148 36.0038528 37.7516212 
            39.4722633 41.164856 42.8286057 44.462841 46.0670166 47.6407013 49.1835785 
            50.6954308 52.176136 53.6256676 55.0440788 56.4315033 57.7881317 59.1142349 
            60.4101181 
yvals     = 28.7378693 28.8901234 29.0368786 29.1780872 29.3137035 29.4436836 29.5679855 
            29.6865673 29.7993908 29.9064178 30.0076122 30.1029396 30.1923714 30.2758732 
            30.3534203 30.4249859 30.4905434 30.5500736 30.6035538 30.6509666 30.6922951 
            30.7275276 30.756649 30.7796516 30.796526 30.8072662 30.8118706 30.8103352 
            30.8026638 30.7888546 30.7689152 30.7428532 30.7106743 30.6723919 30.6280193 
            30.57757 30.5210629 30.4585171 30.3899517 30.3153934 30.2348652 30.1483955 
            30.0560112 29.9577465 29.8536301 29.7437019 29.6279945 29.5065479 29.3794022 
            29.2465973 29.1081791 28.9641914 28.8146801 28.6596966 28.4992867 28.3335037 
            28.1623993 29.3635044 29.5175686 29.6660728 29.8089676 29.9462051 30.0777416 
            30.2035351 30.3235416 30.4377232 30.5460396 30.6484547 30.7449341 30.8354473 
            30.9199619 30.9984474 31.0708809 31.1372356 31.1974888 31.2516193 31.2996082 
            31.3414421 31.3771019 31.40658 31.4298611 31.4469414 31.4578152 31.4624748 
            31.4609203 31.4531555 31.4391785 31.4189949 31.3926144 31.3600445 31.3212948 
            31.2763824 31.2253208 31.1681252 31.1048203 31.0354233 30.959959 30.8784561 
            30.7909393 30.6974392 30.5979862 30.4926167 30.3813629 30.2642651 30.1413593 
            30.0126896 29.8782959 29.738224 29.5925198 29.4412289 29.2844028 29.1220913 
            28.9543457 28.7812233 29.9905567 30.14645 30.2967205 30.4413166 30.5801945 
            30.7133045 30.8406048 30.9620514 31.0776024 31.1872234 31.2908726 31.3885174 
            31.4801216 31.5656586 31.6450958 31.7184067 31.7855663 31.84655 31.9013386 
            31.9499111 31.9922523 32.028347 32.0581818 32.081749 32.0990372 32.1100426 
            32.1147614 32.1131859 32.1053276 32.0911789 32.0707512 32.0440483 32.0110817 
            31.9718628 31.926403 31.8747196 31.8168316 31.7527561 31.682518 31.606142 
            31.5236511 31.4350758 31.3404465 31.2397957 31.1331577 31.0205669 30.9020615 
            30.7776833 30.6474724 30.5114727 30.36973 30.2222919 30.0692024 29.9105167 
            29.7462845 29.5765591 29.4013939 30.6189575 30.7766991 30.9287529 31.0750713 
            31.2156029 31.3503036 31.479126 31.6020279 31.7189655 31.8299026 31.9347992 
            32.0336189 32.1263313 32.2129021 32.2932968 32.3674965 32.4354668 32.4971924 
            32.5526466 32.6018066 32.6446648 32.6811981 32.7113953 32.7352486 32.7527466 
            32.7638855 32.7686615 32.7670708 32.7591133 32.7447929 32.7241173 32.6970901 
            32.663723 32.6240273 32.5780144 32.5257034 32.4671135 32.4022636 32.3311729 
            32.2538719 32.1703873 32.0807419 31.984972 31.8831081 31.7751865 31.6612434 
            31.5413189 31.415451 31.2836857 31.1460629 31.0026321 30.8534412 30.6985359 
            30.5379715 30.3717995 30.2000713 30.0228462 31.2486401 31.4082489 31.5621052 
            31.7101612 31.8523655 31.9886703 32.1190338 32.2434044 32.3617439 32.4740105 
            32.5801697 32.6801796 32.7740059 32.8616219 32.9429893 33.0180817 33.0868797 
            33.1493492 33.2054749 33.2552338 33.2986107 33.3355865 33.3661537 33.3902969 
            33.4080086 33.419281 33.4241142 33.4225044 33.4144478 33.3999557 33.3790283 
            33.3516731 33.3178978 33.2777214 33.2311516 33.1782074 33.1189079 33.0532684 
            32.9813232 32.9030876 32.8185921 32.7278671 32.6309433 32.5278549 32.4186401 
            32.3033295 32.1819687 32.0545959 31.9212589 31.7819977 31.6368618 31.485899 
            31.3291607 31.1666965 30.9985638 30.8248158 30.6455097 31.8795338 32.0410271 
            32.1967049 32.3465157 32.4904099 32.6283379 32.7602539 32.8861122 33.005867 
            33.1194801 33.2269135 33.328125 33.4230804 33.5117493 33.594101 33.6701012 
            33.739727 33.8029556 33.8597603 33.9101219 33.9540215 33.9914474 34.0223846 
            34.0468216 34.0647469 34.0761566 34.0810509 34.0794182 34.0712662 34.0565987 
            34.0354156 34.0077286 33.9735451 33.9328804 33.885746 33.8321609 33.7721405 
            33.7057114 33.6328964 33.5537148 33.4682045 33.3763847 33.2782974 33.1739693 
            33.0634422 32.9467545 32.8239441 32.6950493 32.5601234 32.4192047 32.2723465 
            32.1195946 31.9610043 31.7966251 31.6265125 31.4507217 31.2693138 32.5115662 
            32.6749611 32.8324814 32.984066 33.1296654 33.2692337 33.4027214 33.5300789 
            33.6512642 33.7662392 33.874958 33.9773827 34.0734825 34.1632195 34.2465591 
            34.3234787 34.3939438 34.4579353 34.5154266 34.5663986 34.6108322 34.6487122 
            34.6800232 34.7047539 34.7229004 34.7344475 34.739399 34.737751 34.7294998 
            34.714653 34.6932106 34.6651878 34.6305923 34.5894356 34.541729 34.4874954 
            34.4267502 34.35952 34.2858238 34.2056885 34.1191483 34.026226 33.92696 
            33.8213806 33.7095299 33.5914459 33.4671669 33.3367424 33.2002068 33.0576172 
            32.9090195 32.7544594 32.5939941 32.427681 32.2555695 32.0777168 31.8941879 
            33.1446609 33.3099823 33.4693604 33.6227379 33.7700615 33.9112854 34.04636 
            34.1752357 34.2978668 34.4142151 34.5242348 34.6278877 34.7251396 34.8159561 
            34.9002991 34.9781456 35.0494614 35.1142235 35.1724091 35.223999 35.2689705 
            35.3073082 35.3389969 35.3640289 35.3823929 35.3940811 35.3990936 35.3974228 
            35.3890724 35.3740463 35.3523483 35.3239861 35.2889671 35.2473106 35.1990318 
            35.1441422 35.0826645 35.0146217 34.9400368 34.8589363 34.7713547 34.6773186 
            34.5768585 34.4700165 34.3568306 34.2373352 34.1115761 33.9795952 33.8414383 
            33.6971588 33.5467987 33.390419 33.2280617 33.0597916 32.8856583 32.7057266 
            32.5200539 33.7787514 33.9460144 34.1072655 34.262455 34.4115219 34.5544205 
            34.6910973 34.8215065 34.9455986 35.0633354 35.1746712 35.2795639 35.3779831 
            35.4698868 35.5552444 35.6340294 35.7062035 35.7717476 35.8306351 35.8828468 
            35.92836 35.9671631 35.9992371 36.0245705 36.0431595 36.0549889 36.0600586 
            36.0583687 36.0499191 36.0347099 36.0127487 35.9840431 35.9486008 35.9064407 
            35.8575783 35.8020248 35.7398071 35.6709442 35.5954628 35.5133858 35.4247513 
            35.329586 35.2279243 35.1198044 35.0052643 34.884346 34.7570877 34.623539 
            34.4837456 34.3377571 34.1856194 34.0273933 33.8631287 33.6928825 33.5167122 
            33.3346786 33.1468391 34.4137497 34.5829773 34.7461243 34.903141 35.0539703 
            35.1985588 35.3368568 35.4688148 35.5943871 35.7135239 35.8261909 35.9323387 
            36.0319366 36.1249428 36.2113266 36.2910538 36.3640976 36.4304314 36.4900284 
            36.5428696 36.5889359 36.6282043 36.6606674 36.6863098 36.7051201 36.7170944 
            36.7222252 36.7205162 36.7119598 36.6965675 36.6743393 36.6452866 36.6094208 
            36.5667496 36.5172958 36.4610748 36.3981056 36.3284149 36.2520218 36.1689644 
            36.0792656 35.9829597 35.8800812 35.770668 35.6547623 35.532402 35.4036331 
            35.2684975 35.1270485 34.979332 34.8254051 34.6653137 34.4991188 34.3268776 
            34.1486473 33.964489 33.7744675 35.0495872 35.2207947 35.3858604 35.5447235 
            35.6973305 35.8436279 35.9835625 36.1170883 36.2441483 36.3647079 36.478714 
            36.586132 36.6869202 36.7810402 36.8684616 36.9491463 37.0230713 37.0902023 
            37.1505165 37.2039948 37.2506142 37.2903595 37.3232117 37.3491631 37.3682022 
            37.3803215 37.3855171 37.3837852 37.3751259 37.3595467 37.3370514 37.3076477 
            37.271347 37.2281647 37.178112 37.121212 37.0574875 36.9869576 36.9096489 
            36.825592 36.7348175 36.6373596 36.5332527 36.4225311 36.3052444 36.181427 
            36.0511284 35.9143944 35.7712708 35.6218109 35.4660683 35.3041 35.1359558 
            34.9616966 34.7813873 34.5950851 34.4028549 35.6861801 35.8593903 36.0263901 
            36.1871185 36.3415222 36.4895477 36.6311378 36.766243 36.8948135 37.0168076 
            37.1321716 37.2408714 37.342865 37.4381104 37.526577 37.6082306 37.6830406 
            37.7509804 37.8120232 37.8661461 37.9133263 37.9535522 37.9868011 38.0130653 
            38.0323334 38.0445976 38.0498543 38.0481033 38.039341 38.0235748 38.0008049 
            37.9710464 37.9343109 37.8906059 37.8399506 37.7823639 37.7178726 37.6464958 
            37.5682564 37.4831924 37.3913307 37.2927094 37.1873589 37.0753212 36.9566345 
            36.8313484 36.6995049 36.5611496 36.4163361 36.2651176 36.1075401 35.9436684 
            35.7735558 35.5972633 35.4148521 35.226387 35.031929 36.3234444 36.4986763 
            36.6676331 36.8302498 36.9864693 37.1362381 37.2794991 37.4162025 37.546299 
            37.6697388 37.7864799 37.8964729 37.9996834 38.0960693 38.1855965 38.2682266 
            38.3439369 38.412693 38.4744682 38.5292397 38.576992 38.6176987 38.6513519 
            38.6779327 38.6974335 38.7098465 38.715168 38.7133942 38.704525 38.6885681 
            38.6655273 38.6354103 38.5982285 38.553997 38.5027313 38.4444542 38.3791847 
            38.3069496 38.2277756 38.1416931 38.0487328 37.9489288 37.8423233 37.7289505 
            37.6088562 37.4820824 37.3486748 37.2086868 37.0621643 36.9091606 36.7497368 
            36.5839424 36.4118423 36.2334938 36.0489616 35.8583069 35.661602 36.9613037 
            37.1385803 37.3095093 37.4740295 37.6320839 37.7836151 37.9285698 38.0668869 
            38.1985245 38.3234291 38.441555 38.5528603 38.6573029 38.754837 38.8454361 
            38.9290581 39.0056763 39.0752563 39.1377754 39.1932068 39.2415314 39.2827301 
            39.3167877 39.343689 39.3634224 39.375988 39.3813705 39.3795776 39.3706017 
            39.354454 39.331131 39.3006516 39.2630234 39.2182579 39.166378 39.107399 
            39.0413475 38.9682426 38.8881226 38.8010063 38.7069359 38.6059418 38.4980659 
            38.3833427 38.2618217 38.1335449 37.9985619 37.8569183 37.7086678 37.5538712 
            37.3925743 37.2248421 37.0507317 36.8703079 36.6836319 36.4907684 36.29179 
            37.5996704 37.7790108 37.9519348 38.1183777 38.2782898 38.4315987 38.5782585 
            38.7182121 38.8514061 38.9777908 39.0973206 39.2099495 39.3156357 39.4143372 
            39.5060158 39.590641 39.6681747 39.7385902 39.8018608 39.8579597 39.9068642 
            39.9485588 39.9830246 40.0102539 40.0302277 40.042942 40.0483894 40.0465736 
            40.0374908 40.0211449 39.9975433 39.9666977 39.9286156 39.8833122 39.8308067 
            39.7711182 39.7042732 39.6302948 39.5492134 39.4610558 39.3658638 39.2636642 
            39.1545029 39.0384178 38.9154549 38.7856598 38.6490784 38.505764 38.3557739 
            38.1991539 38.0359688 37.8662758 37.690136 37.5076141 37.3187752 37.1236839 
            36.9224129 38.2384567 38.4198799 38.5948219 38.7632103 38.9249916 39.0801048 
            39.2284927 39.3700943 39.5048637 39.6327438 39.7536926 39.8676605 39.9746056 
            40.074482 40.1672592 40.2528915 40.331356 40.4026146 40.4666443 40.5234146 
            40.5729103 40.6151085 40.6499901 40.6775436 40.6977577 40.7106247 40.7161407 
            40.7143021 40.7051125 40.6885681 40.6646843 40.6334648 40.5949211 40.5490761 
            40.4959373 40.4355354 40.3678894 40.2930222 40.210968 40.1217613 40.0254288 
            39.9220123 39.811554 39.694088 39.5696678 39.4383354 39.3001442 39.1551437 
            39.0033875 38.8449326 38.6798401 38.5081673 38.3299751 38.1453362 37.9543114 
            37.7569656 37.5533791 38.8775826 39.0611115 39.2380867 39.4084396 39.5721169 
            39.7290459 39.8791771 40.0224495 40.1588058 40.2882042 40.4105835 40.5259056 
            40.6341209 40.7351913 40.829071 40.9157333 40.9951324 41.0672455 41.1320457 
            41.1894989 41.2395859 41.2822914 41.3175926 41.3454781 41.3659363 41.3789597 
            41.3845406 41.3826828 41.3733788 41.356636 41.3324623 41.300869 41.2618637 
            41.2154655 41.1616898 41.100563 41.0321045 40.9563408 40.8733063 40.7830315 
            40.6855507 40.5809059 40.4691315 40.3502731 40.2243805 40.0914955 39.9516716 
            39.804966 39.6514282 39.4911156 39.3240929 39.1504211 38.9701614 38.7833786 
            38.5901451 38.3905296 38.1846008 39.5169487 39.7026062 39.8816376 40.053978 
            40.2195663 40.378334 40.5302277 40.6751862 40.8131523 40.9440804 41.0679092 
            41.1846008 41.2941017 41.3963737 41.4913788 41.579071 41.6594238 41.7324028 
            41.7979736 41.8561172 41.9068108 41.9500275 41.9857521 42.0139771 42.0346794 
            42.0478592 42.0535088 42.0516243 42.0422096 42.0252686 42.0008049 41.9688263 
            41.9293556 41.8823967 41.8279762 41.7661171 41.6968346 41.6201668 41.5361404 
            41.4447861 41.3461456 41.2402534 41.1271515 41.0068855 40.8795013 40.7450485 
            40.6035767 40.455143 40.2998047 40.137619 39.968647 39.7929535 39.6105995 
            39.4216576 39.2261963 39.0242805 38.8159904 40.1564713 40.3442764 40.5253868 
            40.6997337 40.8672523 41.0278816 41.1815567 41.3282204 41.4678154 41.6002846 
            41.7255821 41.8436584 41.9544601 42.0579491 42.1540871 42.2428284 42.3241386 
            42.3979912 42.4643517 42.5231934 42.5744934 42.6182289 42.6543884 42.6829491 
            42.7039032 42.7172394 42.7229576 42.7210503 42.711525 42.6943779 42.6696167 
            42.6372566 42.5973091 42.5497856 42.4947128 42.4321098 42.3619995 42.2844162 
            42.1993828 42.1069412 42.007122 41.899971 41.7855263 41.6638336 41.5349426 
            41.3989029 41.2557678 41.1055908 40.9484329 40.7843513 40.6134109 40.4356728 
            40.2512054 40.0600815 39.8623657 39.6581345 39.4474564 40.7960587 40.9860344 
            41.1692429 41.3456192 41.5150909 41.677597 41.8330727 41.9814606 42.1226997 
            42.2567329 42.3835144 42.5029869 42.6151085 42.7198296 42.8171082 42.9069099 
            42.9891968 43.0639305 43.1310883 43.1906357 43.2425499 43.2868118 43.3234062 
            43.3523102 43.3735161 43.3870163 43.3927994 43.390873 43.3812294 43.3638763 
            43.3388176 43.3060684 43.2656403 43.2175484 43.1618118 43.0984573 43.0275078 
            42.9489937 42.8629494 42.7694016 42.668396 42.5599709 42.4441681 42.3210335 
            42.1906204 42.0529747 41.9081573 41.756218 41.5972214 41.431221 41.2582893 
            41.0784912 40.8918877 40.698555 40.4985657 40.2919884 40.078907 41.4356155 
            41.6277847 41.8131142 41.991539 42.1629868 42.3273888 42.4846878 42.6348152 
            42.7777176 42.9133339 43.0416107 43.1625023 43.2759514 43.3819199 43.4803619 
            43.5712318 43.6545029 43.7301331 43.7980919 43.8583565 43.9108925 43.9556885 
            43.9927216 44.0219727 44.0434341 44.0570984 44.0629539 44.0610008 44.0512428 
            44.03368 44.0083199 43.9751778 43.9342613 43.8855896 43.8291893 43.7650719 
            43.6932755 43.6138191 43.5267448 43.4320831 43.3298759 43.2201614 43.1029854 
            42.9783936 42.8464394 42.7071724 42.5606499 42.406929 42.2460709 42.0781403 
            41.9031944 41.7213097 41.5325508 41.3369904 41.1347008 40.9257584 40.7102432 
            42.0750465 42.2694321 42.4569054 42.6374016 42.8108444 42.9771652 43.1363029 
            43.2881927 43.4327774 43.5699921 43.6997871 43.8221092 43.9369087 44.044136 
            44.1437492 44.2357063 44.3199692 44.3965034 44.4652786 44.5262642 44.5794334 
            44.6247673 44.6622467 44.6918488 44.7135696 44.7273979 44.7333221 44.7313461 
            44.7214699 44.7036972 44.6780319 44.6444893 44.6030846 44.5538292 44.4967461 
            44.4318657 44.3592033 44.278801 44.1906853 44.0948944 43.9914703 43.8804512 
            43.7618866 43.6358223 43.5023079 43.3614006 43.2131577 43.0576363 42.8948975 
            42.7250061 42.5480309 42.3640366 42.1730995 41.9752846 41.7706757 41.5593452 
            41.3413734 42.7142563 42.910881 43.1005211 43.2831078 43.4585686 43.6268311 
            43.7878304 43.9415016 44.0877838 44.2266159 44.3579445 44.4817162 44.5978775 
            44.7063789 44.8071785 44.9002342 44.9855042 45.0629578 45.1325569 45.1942749 
            45.248085 45.2939606 45.3318901 45.3618507 45.3838348 45.3978271 45.4038239 
            45.401825 45.3918304 45.3738403 45.3478661 45.3139191 45.2720146 45.222168 
            45.164402 45.0987396 45.0252113 44.9438438 44.8546791 44.7577438 44.6530876 
            44.5407524 44.4207802 44.2932243 44.1581345 44.0155678 43.8655853 43.7082405 
            43.543602 43.3717346 43.1927032 43.0065804 42.8134346 42.6133499 42.406395 
            42.1926498 41.9721985 43.3531456 43.5520325 43.743866 43.928566 44.1060638 
            44.2762871 44.439167 44.5946426 44.7426453 44.8831139 45.015995 45.1412315 
            45.25877 45.3685608 45.470562 45.5647278 45.6510201 45.7294006 45.7998314 
            45.8622894 45.916748 45.9631767 46.001564 46.0318832 46.0541306 46.0682945 
            46.0743637 46.0723419 46.0622253 46.0440178 46.0177307 45.9833755 45.9409676 
            45.890522 45.8320618 45.7656097 45.6912003 45.60886 45.5186272 45.4205399 
            45.3146362 45.2009659 45.0795708 44.9505043 44.8138237 44.6695786 44.5178337 
            44.3586502 44.1920891 44.018219 43.8371124 43.6488342 43.4534645 43.2510796 
            43.0417557 42.8255768 42.6026192 43.9916153 44.192791 44.3868332 44.5736732 
            44.753231 44.9254379 45.0902252 45.2475204 45.3972588 45.5393867 45.6738358 
            45.8005562 45.919487 46.0305862 46.1338043 46.2290955 46.3164177 46.3957367 
            46.4670143 46.5302238 46.5853348 46.6323242 46.6711693 46.7018585 46.7243729 
            46.7387047 46.7448502 46.7428017 46.732563 46.714138 46.6875343 46.6527672 
            46.6098442 46.5587921 46.49963 46.4323807 46.3570786 46.2737541 46.1824417 
            46.0831833 45.9760208 45.8609962 45.7381668 45.6075745 45.4692802 45.3233376 
            45.1698112 45.0087624 44.8402596 44.6643677 44.4811592 44.2907066 44.0930901 
            43.888382 43.6766663 43.4580193 43.2325325 44.62957 44.8330536 45.029335 
            45.2183342 45.3999748 45.5741882 45.7408981 45.9000359 46.0515366 46.1953354 
            46.3313751 46.4595947 46.5799408 46.6923599 46.7968102 46.8932381 46.9816055 
            47.0618744 47.1340065 47.1979752 47.2537498 47.3013077 47.3406219 47.3716812 
            47.3944664 47.4089737 47.4151917 47.4131165 47.4027557 47.3841095 47.3571854 
            47.3219948 47.2785568 47.2268906 47.1670151 47.0989609 47.0227547 46.9384308 
            46.8460274 46.7455826 46.637146 46.5207558 46.3964653 46.264328 46.1244011 
            45.9767456 45.8214188 45.6584854 45.4880142 45.3100777 45.1247482 44.9320984 
            44.7322044 44.5251503 44.3110161 44.0898819 43.8618431 45.2668953 45.4727173 
            45.671257 45.862442 46.0461922 46.222435 46.3910904 46.5520935 46.7053719 
            46.8508682 46.9885139 47.1182518 47.2400246 47.3537865 47.4594803 47.5570602 
            47.6464844 47.7277184 47.8007202 47.8654556 47.9219017 47.9700317 48.0098228 
            48.041256 48.0643158 48.0789986 48.085289 48.0831947 48.0727043 48.053833 
            48.0265846 47.9909706 47.9470062 47.8947182 47.8341217 47.7652473 47.6881294 
            47.6027946 47.509285 47.4076424 47.2979126 47.1801376 47.0543747 46.9206734 
            46.7790985 46.6296997 46.4725533 46.3077126 46.1352577 45.9552536 45.7677765 
            45.5729027 45.3707123 45.1612854 44.944706 44.7210617 44.4904366 45.9034996 
            46.1116791 46.3125076 46.5059013 46.6917839 46.8700714 47.040699 47.2035866 
            47.3586693 47.5058784 47.6451492 47.7764282 47.8996506 48.0147629 48.1217155 
            48.2204666 48.3109627 48.3931694 48.4670486 48.5325661 48.589695 48.638401 
            48.6786728 48.7104874 48.7338295 48.7486877 48.7550545 48.7529335 48.7423172 
            48.723217 48.6956367 48.6595955 48.6151009 48.5621796 48.5008545 48.4311523 
            48.3531075 48.2667465 48.1721191 48.0692635 47.9582214 47.8390465 47.711792 
            47.5765114 47.4332619 47.2821083 47.1231155 46.9563484 46.7818794 46.5997849 
            46.4101372 46.2130165 46.008503 45.7966805 45.5776329 45.3514481 45.1182175 
            46.5392685 46.749836 46.9529724 47.1486015 47.3366394 47.5170021 47.689621 
            47.8544197 48.011322 48.1602669 48.3011894 48.434021 48.5587082 48.6751938 
            48.7834244 48.883358 48.9749413 49.058136 49.1329041 49.1992111 49.2570267 
            49.306324 49.3470802 49.3792801 49.4029045 49.417942 49.4243889 49.4222412 
            49.411499 49.3921661 49.364254 49.3277702 49.2827415 49.2291794 49.1671143 
            49.0965729 49.0175896 48.9301949 48.8344307 48.7303429 48.6179771 48.4973869 
            48.368618 48.2317352 48.0867958 47.9338608 47.7730026 47.6042862 47.427784 
            47.243576 47.0517311 46.8523369 46.6454773 46.4312286 46.2096863 45.980938 
            45.7450714 47.1741028 47.3870773 47.5925522 47.7904396 47.9806595 48.1631203 
            48.3377571 48.5044823 48.6632347 48.8139343 48.9565239 49.0909309 49.2171021 
            49.3349762 49.4445038 49.5456314 49.6383171 49.7225113 49.7981796 49.8652878 
            49.9238014 49.9736977 50.0149498 50.0475388 50.0714493 50.0866699 50.0931931 
            50.0910187 50.0801468 50.0605774 50.0323296 49.9954071 49.9498291 49.8956223 
            49.8328056 49.7614136 49.6814766 49.5930328 49.4961205 49.390789 49.2770805 
            49.1550484 49.0247536 48.8862457 48.7395935 48.5848618 48.4221115 48.2514229 
            48.0728645 47.8865128 47.6924515 47.4907608 47.2815208 47.064827 46.8407631 
            46.6094208 46.3708954 47.807888 48.0233002 48.2311401 48.4313126 48.6237335 
            48.8083229 48.9849968 49.1536789 49.3142967 49.4667778 49.6110497 49.7470551 
            49.8747292 49.9940109 50.1048508 50.2071915 50.3009911 50.3862 50.4627838 
            50.5307007 50.5899239 50.6404266 50.6821785 50.7151604 50.7393646 50.7547684 
            50.7613716 50.7591705 50.7481651 50.728363 50.6997681 50.6623955 50.6162682 
            50.5614014 50.4978294 50.4255714 50.3446732 50.2551613 50.1570854 50.0504913 
            49.9354248 49.8119392 49.6800919 49.5399437 49.3915558 49.2350006 49.0703392 
            48.8976517 48.7170105 48.5284958 48.3321915 48.1281738 47.9165344 47.6973648 
            47.4707527 47.2367897 46.995575 48.4405136 48.6583939 48.8686218 49.071106 
            49.2657585 49.4524956 49.6312332 49.8018951 49.9644051 50.1186867 50.2646713 
            50.4022942 50.5314865 50.6521988 50.7643623 50.8679352 50.9628639 51.0491028 
            51.1266098 51.1953506 51.2552948 51.3064079 51.3486671 51.3820534 51.4065475 
            51.422142 51.4288254 51.4265976 51.4154587 51.3954124 51.3664703 51.3286438 
            51.2819557 51.2264252 51.1620789 51.0889511 51.0070724 50.916481 50.8172264 
            50.7093506 50.592907 50.4679489 50.3345299 50.1927185 50.0425758 49.8841743 
            49.7175789 49.5428696 49.3601227 49.1694145 48.9708366 48.7644691 48.5504036 
            48.3287315 48.0995407 47.8629341 47.6190033 49.0718727 49.2922478 49.5048904 
            49.709713 49.9066238 50.0955353 50.2763634 50.449028 50.6134491 50.769558 
            50.9172745 51.0565338 51.1872711 51.3094254 51.4229393 51.5277596 51.6238327 
            51.711113 51.7895584 51.8591347 51.9198074 51.9715424 52.0143166 52.0481071 
            52.0729027 52.0886879 52.0954552 52.0931969 52.0819206 52.0616302 52.0323372 
            51.9940491 51.9467926 51.8905869 51.8254585 51.751442 51.6685753 51.5768929 
            51.4764404 51.3672676 51.2494278 51.1229744 50.9879646 50.8444672 50.6925468 
            50.5322723 50.3637199 50.1869621 50.0020828 49.8091621 49.608284 49.3995399 
            49.1830177 48.9588127 48.7270203 48.4877357 48.2410622 49.7018471 49.9247437 
            50.1398354 50.347023 50.5462151 50.7373276 50.9202728 51.0949669 51.2613297 
            51.4192848 51.5687561 51.7096748 51.8419762 51.9655991 52.0804749 52.1865578 
            52.2837906 52.3721313 52.4515305 52.5219536 52.5833626 52.6357269 52.6790237 
            52.7132301 52.738327 52.7543068 52.7611542 52.758873 52.7474594 52.7269173 
            52.6972656 52.6585121 52.6106758 52.5537872 52.4878654 52.4129486 52.3290749 
            52.2362823 52.1346207 52.0241318 51.9048767 51.7769089 51.6402893 51.4950829 
            51.341362 51.1791954 51.0086555 50.8298264 50.6427879 50.4476242 50.2444191 
            50.0332718 49.8142662 49.5875015 49.3530731 49.1110878 48.8616371 50.3303261 
            50.5557747 50.7733383 50.9829178 51.1844254 51.3777695 51.5628548 51.7396049 
            51.9079285 52.0677567 52.2190056 52.3616104 52.4954948 52.6206017 52.736866 
            52.8442268 52.9426422 53.0320511 53.1124191 53.1836967 53.2458572 53.2988625 
            53.3426895 53.3773155 53.4027214 53.4188957 53.425827 53.4235153 53.4119606 
            53.3911705 53.3611526 53.3219261 53.2735062 53.2159195 53.1491966 53.0733681 
            52.9884758 52.894558 52.7916603 52.6798401 52.5591507 52.4296455 52.2913933 
            52.1444588 51.9889107 51.8248253 51.6522751 51.4713478 51.2821236 51.0846863 
            50.8791313 50.6655464 50.4440308 50.2146759 49.9775887 49.7328644 49.4806137 
            50.9571953 51.1852226 51.4052887 51.6172905 51.8211403 52.0167389 52.2039948 
            52.3828239 52.5531425 52.7148666 52.8679199 53.0122261 53.1477203 53.274334 
            53.3919983 53.5006638 53.6002693 53.6907692 53.7721176 53.8442688 53.9071884 
            53.9608459 54.0052109 54.0402603 54.065979 54.0823517 54.0893707 54.0870285 
            54.0753326 54.054287 54.0238991 53.9841919 53.9351768 53.8768845 53.8093452 
            53.7325897 53.6466637 53.5516014 53.4474602 53.3342857 53.2121391 53.0810814 
            52.9411697 52.7924805 52.6350822 52.4690514 52.2944679 52.1114159 51.9199753 
            51.7202415 51.5123024 51.296257 51.072197 50.8402252 50.6004448 50.3529587 
            50.0978737 51.5823288 51.8129692 52.0355682 52.2500229 52.4562416 52.6541252 
            52.8435822 53.0245209 53.1968536 53.3605003 53.5153809 53.6614189 53.798542 
            53.9266815 54.0457726 54.1557579 54.2565765 54.3481827 54.4305229 54.5035591 
            54.5672531 54.6215668 54.6664772 54.7019615 54.7279968 54.7445717 54.7516785 
            54.7493095 54.7374687 54.7161598 54.6854019 54.6451988 54.5955849 54.5365753 
            54.4682045 54.3905106 54.3035355 54.2073174 54.1019058 53.9873619 53.863739 
            53.7310982 53.5895119 53.4390411 53.2797699 53.1117668 52.9351196 52.7499123 
            52.5562325 52.3541679 52.1438179 51.9252777 51.6986465 51.4640274 51.2215233 
            50.9712448 50.713295 52.205616 52.4388962 52.6640587 52.8810005 53.0896187 
            53.289814 53.4814987 53.6645737 53.8389511 54.0045471 54.1612816 54.3090744 
            54.4478493 54.5775414 54.6980782 54.8093987 54.9114494 55.0041771 55.0875282 
            55.1614647 55.2259407 55.2809258 55.3263931 55.3623161 55.3886719 55.4054527 
            55.4126472 55.4102478 55.398262 55.3766899 55.3455467 55.3048515 55.2546234 
            55.1948853 55.1256752 55.0470276 54.9589844 54.8615875 54.7548943 54.638958 
            54.5138359 54.3795929 54.2363014 54.0840263 53.9228516 53.7528534 53.5741158 
            53.3867264 53.190773 52.9863548 52.7735634 52.5524979 52.3232651 52.0859642 
            51.8407059 51.5876007 51.3267555 52.826931 53.0628853 53.2906418 53.5100975 
            53.7211456 53.9236908 54.11763 54.3028679 54.4793205 54.6468964 54.8055077 
            54.9550819 55.0955353 55.2267952 55.3488007 55.461483 55.564785 55.6586494 
            55.7430267 55.8178749 55.8831482 55.9388161 55.984848 56.0212135 56.0479012 
            56.064888 56.0721703 56.0697441 56.0576057 56.0357666 56.0042381 55.9630394 
            55.9121857 55.8517113 55.7816467 55.7020264 55.6128998 55.5143127 55.406311 
            55.2889595 55.1623192 55.0264511 54.8814278 54.7273254 54.5642242 54.3922005 
            54.2113419 54.02174 53.8234863 53.6166801 53.401413 53.1777954 52.9459267 
            52.7059135 52.4578705 52.2019043 51.9381371 53.4461517 53.6848106 53.9151955 
            54.1371956 54.350708 54.5556297 54.7518539 54.9392929 55.1178474 55.287426 
            55.4479446 55.5993233 55.7414818 55.8743401 55.9978371 56.1119003 56.2164688 
            56.3114891 56.3969116 56.4726868 56.5387688 56.5951309 56.6417313 56.6785545 
            56.705574 56.7227745 56.7301483 56.7276878 56.7154007 56.6932907 56.6613693 
            56.6196518 56.5681686 56.5069427 56.4360085 56.3554039 56.2651787 56.1653748 
            56.0560493 55.9372635 55.8090782 55.6715584 55.5247841 55.368824 55.2037621 
            55.029686 54.8466797 54.6548347 54.4542503 54.2450218 54.0272522 53.8010445 
            53.5665092 53.3237534 53.0728912 52.8140373 52.5473061 54.0631561 54.304554 
            54.5375977 54.7621803 54.9781876 55.1855164 55.3840599 55.5737228 55.7544098 
            55.9260254 56.0884819 56.2416916 56.3855743 56.5200577 56.6450653 56.7605324 
            56.866394 56.9625893 57.0490723 57.1257858 57.1926956 57.2497597 57.2969437 
            57.3342247 57.3615837 57.3790016 57.386467 57.383976 57.3715363 57.3491478 
            57.3168259 57.2745895 57.2224579 57.1604691 57.0886536 57.0070496 56.9157028 
            56.8146667 56.7039948 56.5837517 56.4539986 56.3148041 56.1662445 56.0084038 
            55.8413582 55.6651955 55.4800072 55.2858925 55.082943 54.8712616 54.6509552 
            54.4221268 54.1848907 53.9393578 53.6856422 53.4238663 53.1541405 54.6778145 
            54.9219856 55.1577263 55.3849182 55.6034546 55.8132248 56.014122 56.2060432 
            56.3888931 56.5625725 56.7269936 56.8820648 57.0277061 57.1638374 57.2903824 
            57.4072723 57.5144463 57.6118355 57.6993942 57.7770691 57.8448143 57.9025955 
            57.9503746 57.9881248 58.0158272 58.0334625 58.0410233 58.0385017 58.0259018 
            58.003231 57.9705048 57.9277344 57.8749542 57.8121872 57.7394714 57.6568489 
            57.5643654 57.4620781 57.3500366 57.2283096 57.0969658 56.9560699 56.8057022 
            56.6459465 56.4768867 56.2986107 56.1112099 55.9147873 55.7094421 55.4952774 
            55.2723961 55.0409164 54.8009453 54.5526009 54.2960014 54.0312653 53.7585144 
            55.2900009 55.5369797 55.7754517 56.005291 56.2263908 56.4386368 56.6419182 
            56.836132 57.0211754 57.1969528 57.363369 57.5203285 57.6677551 57.8055573 
            57.9336662 58.0520058 58.160511 58.2591209 58.3477745 58.4264221 58.4950218 
            58.5535278 58.6019096 58.6401367 58.66819 58.6860504 58.6937065 58.6911545 
            58.6783943 58.6554375 58.6222954 58.5789871 58.5255394 58.4619789 58.3883514 
            58.3046951 58.2110558 58.1074944 57.9940605 57.8708305 57.7378616 57.5952377 
            57.4430351 57.2813377 57.1102295 56.9298058 56.7401657 56.5414047 56.3336258 
            56.1169395 55.8914566 55.6572876 55.414547 55.163353 54.9038315 54.6361046 
            54.3602905 55.8995819 56.1494102 56.3906441 56.6231689 56.8468666 57.0616226 
            57.2673264 57.4638634 57.6511383 57.8290443 57.9974823 58.1563644 58.305603 
            58.4451103 58.5748062 58.694622 58.8044815 58.9043274 58.9940948 59.0737343 
            59.1431999 59.2024498 59.2514458 59.2901573 59.3185692 59.3366547 59.3444099 
            59.3418236 59.3289032 59.3056526 59.2720871 59.2282295 59.1741028 59.1097412 
            59.035183 58.9504738 58.8556595 58.7507973 58.635952 58.5111885 58.3765755 
            58.2321968 58.078125 57.9144516 57.7412682 57.5586662 57.366745 57.1656113 
            56.9553719 56.7361298 56.5080032 56.2711067 56.0255623 55.7714882 55.5090065 
            55.2382507 54.959343 56.5064316 56.75914 57.0031776 57.2384262 57.4647598 
            57.6820602 57.8902168 58.089119 58.2786522 58.4587212 58.6292191 58.7900543 
            58.9411354 59.0823708 59.2136841 59.3349953 59.4462395 59.5473404 59.6382446 
            59.718895 59.7892418 59.849247 59.8988686 59.938076 59.9668503 59.9851685 
            59.9930191 59.9904022 59.9773178 59.9537697 59.9197769 59.8753586 59.8205414 
            59.7553596 59.6798553 59.5940704 59.4980621 59.39188 59.2755966 59.1492729 
            59.012989 58.8668175 58.7108498 58.5451736 58.3698769 58.1850624 57.9908333 
            57.7872887 57.5745468 57.3527145 57.1219101 56.8822517 56.6338615 56.3768692 
            56.111393 55.8375702 55.5555305 57.1104164 57.3660431 57.6129227 57.8509254 
            58.0799332 58.2998199 58.5104675 58.7117653 58.9035988 59.085865 59.2584572 
            59.4212761 59.5742264 59.7172241 59.8501816 59.9730225 60.0856667 60.1880493 
            60.2801094 60.3617897 60.4330368 60.4938087 60.5440674 60.5837822 60.6129227 
            60.6314774 60.639431 60.6367798 60.6235237 60.5996742 60.5652428 60.520256 
            60.4647331 60.3987198 60.3222504 60.2353745 60.1381454 60.0306206 59.9128723 
            59.7849655 59.6469765 59.4989891 59.3410912 59.1733742 58.9959335 58.8088722 
            58.6122932 58.4063072 58.1910248 57.9665642 57.7330399 57.4905853 57.239315 
            56.9793625 56.7108574 56.4339333 56.1487198 57.7113953 57.9699821 58.2197418 
            58.4605408 58.6922607 58.914772 59.1279488 59.3316803 59.5258522 59.7103462 
            59.885067 60.0499039 60.2047615 60.3495522 60.4841805 60.6085739 60.7226486 
            60.8263397 60.9195747 61.0023041 61.0744667 61.1360245 61.1869316 61.2271576 
            61.2566795 61.2754745 61.2835312 61.2808456 61.2674179 61.2432594 61.2083817 
            61.1628113 61.106575 61.0397072 60.9622574 60.8742676 60.775795 60.6669044 
            60.5476608 60.4181404 60.2784195 60.1285858 59.9687271 59.7989349 59.6193161 
            59.4299698 59.2310028 59.0225334 58.8046761 58.5775452 58.3412704 58.095974 
            57.8417854 57.5788345 57.3072586 57.0271912 56.7387733 58.3092346 58.5708199 
            58.8234978 59.0671387 59.301609 59.5267792 59.7425308 59.9487343 60.1452789 
            60.3320465 60.5089264 60.6758156 60.8326149 60.979229 61.1155624 61.2415352 
            61.3570709 61.4620895 61.5565262 61.6403198 61.7134209 61.7757759 61.8273468 
            61.8680954 61.8980026 61.9170418 61.9252052 61.9224854 61.9088821 61.884407 
            61.8490753 61.8029099 61.7459412 61.6782112 61.5997581 61.5106316 61.4108963 
            61.3006134 61.1798515 61.048687 60.9071999 60.7554817 60.5936279 60.4217262 
            60.2398911 60.0482216 59.8468323 59.6358414 59.4153633 59.1855278 58.9464569 
            58.6982803 58.4411316 58.1751442 57.9004593 57.6172142 57.3255501 58.9037933 
            59.1684189 59.424057 59.670578 59.9078407 60.1357193 60.3540764 60.5627975 
            60.7617531 60.9508286 61.1299095 61.2988892 61.4576645 61.6061325 61.7442055 
            61.871788 61.9888077 62.0951805 62.1908417 62.2757263 62.349781 62.4129524 
            62.4651985 62.506485 62.5367813 62.5560722 62.5643425 62.5615883 62.5478058 
            62.5230064 62.4872131 62.4404411 62.3827286 62.3141098 62.2346344 62.1443558 
            62.0433273 61.9316254 61.8093109 61.6764717 61.5331917 61.3795586 61.2156677 
            61.041626 60.8575325 60.6635017 60.4596481 60.2460938 60.0229607 59.7903748 
            59.5484657 59.2973709 59.03722 58.768158 58.4903183 58.2038536 57.9089012 
            59.4949303 59.7626381 60.0212822 60.2707214 60.5108223 60.7414436 60.9624557 
            61.1737328 61.3751411 61.5665665 61.7478867 61.9189949 62.0797806 62.2301407 
            62.3699799 62.4992104 62.6177444 62.7254982 62.8224106 62.9084053 62.9834328 
            63.0474358 63.1003723 63.1422043 63.172905 63.1924515 63.2008324 63.19804 
            63.1840744 63.158947 63.1226768 63.0752907 63.0168152 62.9472923 62.8667755 
            62.7753143 62.6729736 62.5598183 62.4359283 62.301384 62.1562691 62.0006828 
            61.8347244 61.6584969 61.4721069 61.2756767 61.0693207 60.8531609 60.627327 
            60.3919487 60.1471596 59.8931007 59.6299057 59.3577232 59.0766945 58.7869682 
            58.4886894 60.0825005 60.3533325 60.6150246 60.8674316 61.1104126 61.3438225 
            61.5675316 61.7814064 61.9853134 62.1791267 62.3627281 62.5360031 62.6988373 
            62.8511276 62.9927711 63.1236763 63.2437553 63.3529243 63.451107 63.5382385 
            63.6142578 63.6791115 63.7327538 63.7751427 63.8062553 63.8260651 63.8345566 
            63.8317261 63.8175735 63.7921104 63.7553558 63.7073364 63.6480827 63.5776405 
            63.4960594 63.4033928 63.2997093 63.1850739 63.0595741 62.9232864 62.7763062 
            62.6187325 62.4506645 62.272213 62.0834885 61.884613 61.6757088 61.4569016 
            61.2283211 60.9901085 60.7423973 60.4853287 60.2190475 59.9437027 59.6594391 
            59.3664055 59.0647621 60.6663551 60.9403572 61.205143 61.4605637 61.7064667 
            61.9427147 62.1691666 62.3856812 62.5921288 62.7883759 62.9743042 63.1497841 
            63.3147087 63.4689674 63.6124496 63.7450676 63.8667221 63.9773293 64.0768127 
            64.1651077 64.2421417 64.3078613 64.3622208 64.4051895 64.4367142 64.4567947 
            64.4654007 64.462532 64.4481888 64.4223785 64.3851318 64.3364639 64.2764206 
            64.2050323 64.1223679 64.0284653 63.9234123 63.8072701 63.6801224 63.5420609 
            63.393177 63.2335739 63.0633583 62.882637 62.6915359 62.4901733 62.2786751 
            62.0571747 61.8258095 61.584713 61.334034 61.0739136 60.8045006 60.5259438 
            60.2384033 59.9420242 59.6369705 61.2463455 61.5235672 61.7914925 62.0499687 
            62.2988472 62.5379791 62.7672195 62.9864235 63.1954575 63.3941841 63.5824776 
            63.7602081 63.9272652 64.0835266 64.2288895 64.3632507 64.4865189 64.5985947 
            64.6994095 64.788887 64.8669586 64.9335709 64.9886703 65.0322113 65.0641708 
            65.0845261 65.0932465 65.0903397 65.075798 65.0496445 65.0118866 64.9625626 
            64.9017029 64.8293533 64.745575 64.6504135 64.5439606 64.4262772 64.2974548 
            64.1575775 64.006752 63.8450775 63.6726685 63.4896431 63.2961159 63.0922203 
            62.8780823 62.6538429 62.4196396 62.1756172 61.9219208 61.658699 61.3861084 
            61.1043015 60.8134346 60.5136681 60.2051582 61.8223228 62.1028061 62.3739204 
            62.6355019 62.8874054 63.129467 63.3615417 63.5834846 63.7951546 63.9964066 
            64.1871109 64.3671417 64.5363693 64.6946793 64.8419571 64.9781036 65.1030121 
            65.2165985 65.318779 65.409462 65.4886017 65.5561142 65.611969 65.6561127 
            65.6885071 65.709137 65.7179794 65.7150345 65.7002945 65.6737823 65.6355057 
            65.5855026 65.5238113 65.4504776 65.3655624 65.2691193 65.161232 65.0419693 
            64.9114304 64.7697067 64.6168976 64.4531097 64.2784653 64.0930862 63.8970909 
            63.6906128 63.4737892 63.2467613 63.0096741 62.7626724 62.5059128 62.2395439 
            61.963726 61.6786194 61.3843803 61.0811806 60.7691765 62.3941307 62.6779251 
            62.9522743 63.2170143 63.4719887 63.7170334 63.9519958 64.1767273 64.3910751 
            64.594902 64.7880707 64.9704437 65.1418915 65.3022919 65.4515305 65.5895004 
            65.7160873 65.8312149 65.9347839 66.0267105 66.1069336 66.1753769 66.2320023 
            66.2767563 66.3096085 66.3305206 66.3394852 66.3365021 66.3215561 66.2946701 
            66.255867 66.2051697 66.1426315 66.0682907 65.9822083 65.8844452 65.7750931 
            65.6542206 65.5219269 65.3783112 65.2234802 65.0575409 64.8806152 64.6928329 
            64.4943161 64.2852097 64.0656509 63.8357849 63.5957603 63.3457336 63.0858574 
            62.8162918 62.5372009 62.2487411 61.951088 61.6444054 61.3288574 62.9616089 
            63.2487679 63.5264053 63.7943535 64.0524445 64.3005295 64.5384293 64.7659988 
            64.9830856 65.189537 65.3852158 65.5699768 65.7436905 65.9062271 66.0574722 
            66.1973038 66.3256149 66.4423141 66.5473022 66.6405029 66.7218399 66.7912369 
            66.8486557 66.8940353 66.9273453 66.948555 66.9576492 66.9546127 66.9394608 
            66.9122009 66.8728485 66.8214493 66.7580338 66.6826553 66.5953827 66.4962769 
            66.3854218 66.2629013 66.1288147 65.9832687 65.8263626 65.6582184 65.4789658 
            65.2887344 65.0876465 64.8758621 64.6535187 64.4207611 64.1777496 63.9246407 
            63.6615982 63.3887863 63.106369 62.8145142 62.5133934 62.2031822 61.8840485 
            63.524601 63.8151703 64.0961456 64.3673553 64.6286316 64.8797913 65.1206894 
            65.3511581 65.5710297 65.780159 65.9784012 66.1656036 66.341629 66.5063553 
            66.6596451 66.801384 66.9314575 67.0497665 67.1562195 67.2507172 67.3331909 
            67.4035721 67.4617996 67.5078201 67.5416031 67.5631104 67.5723343 67.5692596 
            67.553894 67.5262451 67.4863358 67.4342041 67.3698959 67.2934647 67.2049637 
            67.1044846 66.9920883 66.8678818 66.7319641 66.5844345 66.425415 66.2550201 
            66.0733871 65.8806534 65.6769485 65.4624252 65.237236 65.0015335 64.7554855 
            64.4992447 64.2329865 63.9568672 63.6710739 63.3757706 63.0711365 62.7573471 
            62.4345779 64.0829391 64.376976 64.6613464 64.9358673 65.2003708 65.4546814 
            65.6986313 65.932045 66.1547623 66.3666229 66.567482 66.7571793 66.9355774 
            67.1025314 67.2579117 67.4016037 67.5334854 67.65345 67.7613907 67.8572235 
            67.9408722 68.0122528 68.071312 68.1179962 68.1522598 68.1740799 68.1834335 
            68.1803131 68.1647263 68.1366806 68.096199 68.0433273 67.978096 67.9005737 
            67.8108292 67.708931 67.5949631 67.4690323 67.3312302 67.1816788 67.0204926 
            66.8478012 66.6637344 66.4684372 66.2620621 66.0447464 65.8166656 65.5779648 
            65.3288116 65.0693817 64.7998505 64.5203781 64.2311554 63.9323502 63.6241493 
            63.3067322 62.9802856 64.6364517 64.9340057 65.2218246 65.4997253 65.7675171 
            66.025032 66.2720795 66.5085068 66.7341232 66.9487839 67.1523132 67.3445587 
            67.5253754 67.6946182 67.85215 67.9978409 68.1315689 68.2532196 68.3627014 
            68.4598999 68.5447464 68.617157 68.6770706 68.7244339 68.7591934 68.7813339 
            68.7908249 68.7876587 68.771843 68.7433929 68.7023239 68.6486816 68.5825119 
            68.5038757 68.4128418 68.3094864 68.1939087 68.0662079 67.9264832 67.7748566 
            67.6114502 67.4364014 67.249855 67.0519485 66.8428345 66.622673 66.3916321 
            66.1498718 65.8975677 65.6348953 65.36203 65.0791473 64.786438 64.4840775 
            64.1722641 63.8511696 63.5209923 65.1849747 65.4861069 65.7774353 66.0587616 
            66.3299026 66.5906754 66.8408966 67.0803833 67.3089676 67.526474 67.7327347 
            67.9275894 68.1108856 68.2824707 68.4421997 68.5899353 68.725563 68.8489532 
            68.9600067 69.0586166 69.1446915 69.2181625 69.2789536 69.3270111 69.3622894 
            69.3847504 69.3943863 69.3911743 69.3751221 69.3462448 69.3045731 69.250145 
            69.1830063 69.1032257 69.0108719 68.9060287 68.7887955 68.6592712 68.5175705 
            68.3638229 68.1981506 68.0206909 67.8315964 67.6310196 67.4191208 67.1960526 
            66.9619904 66.7171173 66.4615936 66.1956177 65.9193573 65.6330109 65.3367538 
            65.0307922 64.7153015 64.39048 64.0565262 65.7283325 66.0330963 66.3279877 
            66.6128006 66.887352 67.1514511 67.4048996 67.647522 67.8791275 68.0995483 
            68.3086014 68.5061264 68.6919556 68.8659363 69.0279236 69.1777649 69.3153381 
            69.4405136 69.5531769 69.6532364 69.7405777 69.8151321 69.8768311 69.9255981 
            69.9614029 69.9842072 69.9939804 69.9907227 69.9744339 69.9451294 69.902832 
            69.8475952 69.7794571 69.6985016 69.6047897 69.4984207 69.3794785 69.2480927 
            69.1043701 68.9484406 68.7804413 68.6005173 68.4088211 68.2055054 67.9907455 
            67.7647171 67.5275726 67.2795181 67.0207214 66.7513733 66.4716644 66.1817856 
            65.8819351 65.5723038 65.2530899 64.9244919 64.5867081 66.2663422 66.5747986 
            66.8733063 67.1616745 67.4396973 67.7071838 67.9639282 68.2097473 68.4444427 
            68.6678467 68.8797607 69.0800095 69.2684402 69.4448776 69.6091766 69.7611771 
            69.9007492 70.0277557 70.1420822 70.2436218 70.3322754 70.4079437 70.4705658 
            70.5200806 70.556427 70.5795746 70.5895004 70.5861893 70.5696487 70.5399017 
            70.4969635 70.4408951 70.3717346 70.289566 70.194458 70.0865097 69.9658279 
            69.8325272 69.6867218 69.5285568 69.3581696 69.1757126 68.9813538 68.7752457 
            68.5575714 68.3284988 68.0882187 67.8369141 67.5747681 67.3019943 67.0187759 
            66.7253036 66.4217987 66.1084442 65.7854538 65.4530258 65.1113586 66.7988205 
            67.1110229 67.4132233 67.7052078 67.986763 68.2577057 68.5178146 68.7668915 
            69.0047531 69.2311935 69.4460297 69.649086 69.8401794 70.0191422 70.1858063 
            70.3400269 70.4816513 70.6105423 70.7265778 70.8296432 70.9196396 70.9964676 
            71.0600433 71.1103134 71.1472244 71.1707306 71.180809 71.1774445 71.1606522 
            71.1304398 71.0868454 71.0299149 70.9597015 70.8762817 70.7797394 70.6701736 
            70.5476913 70.4124222 70.2644806 70.1040192 69.9311905 69.7461395 69.5490417 
            69.3400726 69.1194077 68.8872375 68.6437454 68.389122 68.1235733 67.8472977 
            67.5605011 67.2633896 66.9561615 66.6390305 66.3121948 65.9758835 65.6302872 
            67.3255768 67.6415939 67.9475403 68.2432022 68.5283661 68.8028259 69.0663681 
            69.3187866 69.5598679 69.7894287 70.0072632 70.2131882 70.4070129 70.588562 
            70.7576675 70.9141617 71.0578995 71.1887283 71.3065262 71.411171 71.5025482 
            71.5805588 71.6451263 71.6961823 71.7336655 71.7575378 71.7677765 71.7643585 
            71.7473068 71.7166214 71.672348 71.6145248 71.5432281 71.458519 71.3604965 
            71.2492676 71.124939 70.9876328 70.8375015 70.6746826 70.4993362 70.3116226 
            70.1117325 69.899826 69.6761017 69.4407578 69.1939774 68.9359741 68.666954 
            68.3871155 68.0966721 67.7958374 67.4848328 67.1638565 66.8331375 66.4928818 
            66.1433029 67.8464279 68.1663132 68.4760742 68.7754822 69.0643234 69.3423767 
            69.6094208 69.865242 70.1096344 70.3423843 70.5632858 70.7721481 70.9687805 
            71.1529846 71.3245926 71.4834366 71.6293411 71.7621765 71.8817825 71.9880447 
            72.0808487 72.1600876 72.2256775 72.2775421 72.3156204 72.3398743 72.3502731 
            72.3468094 72.3294754 72.2983093 72.2533264 72.1945953 72.1221695 72.0361404 
            71.9365921 71.8236389 71.697403 71.5580139 71.4056244 71.2403793 71.0624466 
            70.8720093 70.6692352 70.4543304 70.227478 69.9888763 69.7387466 69.4772873 
            69.2047119 68.9212418 68.6270905 68.3224792 68.0076218 67.6827469 67.3480759 
            67.00383 66.6502151 68.3611603 68.6849899 68.9986267 69.301857 69.5944366 
            69.876152 70.1467743 70.4060822 70.6538544 70.8898697 71.1139221 71.3258057 
            71.5253143 71.7122498 71.8864365 72.0476837 72.1958313 72.330719 72.4522018 
            72.5601425 72.6544189 72.7349243 72.8015594 72.8542633 72.8929596 72.9176025 
            72.9281769 72.9246521 72.9070435 72.8753662 72.8296585 72.7699814 72.6963959 
            72.6089935 72.5078735 72.3931427 72.264946 72.1234055 71.968689 71.8009491 
            71.6203613 71.4271164 71.2213974 71.0034027 70.7733459 70.5314255 70.2778549 
            70.0128632 69.7366714 69.4494934 69.1515579 68.8431015 68.5243378 68.1955032 
            67.8568192 67.5085144 67.1508179 
