# Supplementary material for: A comparison of sea salt emission parameterizations in northwestern Europe using a chemistry transport model setup
Source: Copernicus journal article supplement (doi:10.5194/acp-16-9905-2016), 2016-08-08
Supplement: Supplementary file 2 [file acp-16-9905-2016-supplement.zip › ssemis/run_ov14_and_sp13_example.sh]

#!/bin/bash

cd ssemis_v4.0.1

Rscript ssemis_main_ovadnevaite.R --args FROM=2008370 TO=2008370 GRID_NAME=CD24
Rscript ssemis_main_spada.R --args FROM=2008370 TO=2008370 GRID_NAME=CD24

cd ..
