# Supplementary material for: A comparison of sea salt emission parameterizations in northwestern Europe using a chemistry transport model setup
Source: Copernicus journal article supplement (doi:10.5194/acp-16-9905-2016), 2016-08-08
Supplement: Supplementary file 2 [file acp-16-9905-2016-supplement.zip › wetdep/wetdep.timeseries.values.DE0002R.zero.moreStations.csv]

doy_start	hour_start	doy_end	hour_end	n_vals	Na in kg/ha/d	precip in mm/d
2008001	8	2008002	8	24	0	0
2008002	8	2008003	8	24	0	0
2008003	8	2008004	8	24	0	0
2008004	8	2008005	8	24	0	1.31749038759154
2008005	8	2008006	8	24	2.34792506075486e-19	2.66665441813984
2008006	8	2008007	8	24	3.5228684233549e-20	0.242374128409795
2008007	8	2008008	8	24	2.9543755813395e-18	5.4992015442258
2008008	8	2008009	8	24	3.75859988233838e-20	1.3210213154325
2008009	8	2008010	8	24	3.58488562923072e-20	0.562968971362583
2008010	8	2008011	8	24	3.35354502999897e-29	0.0192654274037484
2008011	8	2008012	8	24	3.45672814754172e-21	0.108061709790806
2008012	8	2008013	8	24	5.28873694022388e-19	0.919387860924189
2008013	8	2008014	8	24	3.03546047122702e-21	0.0306448242425846
2008014	8	2008015	8	24	1.59685075050572e-20	0.089847510227503
2008015	8	2008016	8	24	7.91485238543933e-21	1.77745174669643
2008016	8	2008017	8	24	9.870021600368e-20	0.057614790113477
2008017	8	2008018	8	24	5.68279462174594e-19	4.69290095883496
2008018	8	2008019	8	24	2.55914293396869e-18	5.15001357842446
2008019	8	2008020	8	24	6.07426359139991e-19	6.94488394494615
2008020	8	2008021	8	24	1.66691325433815e-18	11.6680772383825
2008021	8	2008022	8	24	1.94562232766167e-18	26.5738161404079
2008022	8	2008023	8	24	0	0.212023345336003
2008023	8	2008024	8	24	2.69066773242073e-19	2.21726336834645
2008024	8	2008025	8	24	1.34565581506705e-19	1.47327004644235
2008025	8	2008026	8	24	5.3971964448218e-27	1.69483163681364e-05
2008026	8	2008027	8	24	2.12909856703606e-19	7.15732173453084
2008027	8	2008028	8	24	1.88064034237084e-19	4.60080008255488
2008028	8	2008029	8	24	8.83911343144211e-23	0.00432248336181336
2008029	8	2008030	8	24	0	0
2008030	8	2008031	8	24	3.02806766126387e-20	0.951057004776419
2008031	8	2008032	8	24	1.06310430912615e-19	0.444020606728316
2008032	8	2008033	8	24	8.7108882811031e-20	0.814010761699026
2008033	8	2008034	8	24	6.47644991536349e-28	0.0774879080399166
2008034	8	2008035	8	24	0	0
2008035	8	2008036	8	24	5.8100629313477e-22	0.00643149300501848
2008036	8	2008037	8	24	2.207067289005e-18	8.89208291267606
2008037	8	2008038	8	24	1.05158210717458e-18	3.22042417673842
2008038	8	2008039	8	24	0	2.58972536107964e-11
2008039	8	2008040	8	24	1.33161565432857e-27	8.14599137364642e-10
2008040	8	2008041	8	24	0	4.53318308223325e-11
2008041	8	2008042	8	24	0	0
2008042	8	2008043	8	24	1.46115220972287e-21	0.000149021676470648
2008043	8	2008044	8	24	3.24360430898962e-20	0.0503791423393096
2008044	8	2008045	8	24	1.72511296842626e-21	0.000114748944037789
2008045	8	2008046	8	24	3.82487380284016e-20	0.070765370929246
2008046	8	2008047	8	24	0	0
2008047	8	2008048	8	24	0	0
2008048	8	2008049	8	24	4.03639441571259e-23	7.3864704575044e-07
2008049	8	2008050	8	24	5.01680223224208e-20	0.83391092986858
2008050	8	2008051	8	24	2.27122236569812e-20	0.141903846402441
2008051	8	2008052	8	24	6.809048616901e-20	0.188650541659818
2008052	8	2008053	8	24	5.31198265140105e-20	2.09229555709552
2008053	8	2008054	8	24	3.54565656343747e-19	6.09350924274157
2008054	8	2008055	8	24	1.2445581270698e-32	5.17824958748067e-05
2008055	8	2008056	8	24	2.59881283013282e-19	1.19898792305776
2008056	8	2008057	8	24	1.26695816378176e-19	0.285103889441525
2008057	8	2008058	8	24	5.02680866780633e-19	4.82905087689639
2008058	8	2008059	8	24	2.13497352824782e-18	1.59498756119779
2008059	8	2008060	8	24	1.69716645554751e-25	1.13929191293744e-05
2008060	8	2008061	8	16	1.04623907576143e-19	4.66877638005753
2008182	8	2008183	8	8	0	0
2008183	8	2008184	8	24	0	0
2008184	8	2008185	8	24	0	0
2008185	8	2008186	8	24	1.7138414417453e-18	2.13158417777793
2008186	8	2008187	8	24	1.32283069056828e-18	6.82740735160717
2008187	8	2008188	8	24	1.05696898216115e-19	0.106627620185967
2008188	8	2008189	8	24	1.54944756018415e-18	1.15177759391372
2008189	8	2008190	8	24	2.09869331776167e-19	0.341726985040109
2008190	8	2008191	8	24	4.44049704800387e-21	0.168322147266519
2008191	8	2008192	8	24	9.05552381453177e-19	4.47031047094187
2008192	8	2008193	8	24	4.56649424121355e-18	11.8355031932267
2008193	8	2008194	8	24	2.68355757050595e-18	3.10385644286393
2008194	8	2008195	8	24	3.08367830793708e-18	2.43290857136678
2008195	8	2008196	8	24	0	4.94664368060754e-12
2008196	8	2008197	8	24	0	0
2008197	8	2008198	8	24	2.71672690940412e-19	0.288799021734458
2008198	8	2008199	8	24	2.4865000624561e-18	1.48449328904193
2008199	8	2008200	8	24	4.23710710705524e-18	3.24923893722132
2008200	8	2008201	8	24	8.2094766202658e-21	0.14913273684438
2008201	8	2008202	8	24	7.77121885326391e-18	5.69124107351992
2008202	8	2008203	8	24	5.76900858949781e-19	0.456515998294191
2008203	8	2008204	8	24	2.76786663938263e-18	3.23039840281247
2008204	8	2008205	8	24	1.43846909632346e-27	1.95795232602561e-09
2008205	8	2008206	8	24	0	0
2008206	8	2008207	8	24	0	1.05718956484001e-09
2008207	8	2008208	8	24	3.24054286928127e-24	0.056347697539868
2008208	8	2008209	8	24	0	0
2008209	8	2008210	8	24	0	0
2008210	8	2008211	8	24	0	0
2008211	8	2008212	8	24	0	0
2008212	8	2008213	8	24	0	0
2008213	8	2008214	8	24	0	0
2008214	8	2008215	8	24	2.90120455110471e-18	2.3756944467961
2008215	8	2008216	8	24	2.48591405569411e-20	0.0135837584807124
2008216	8	2008217	8	24	9.24706857774602e-18	13.6985208258383
2008217	8	2008218	8	24	2.86508686114349e-18	2.8505930311011
2008218	8	2008219	8	24	0	0
2008219	8	2008220	8	24	8.75243187128755e-20	0.0925934757391331
2008220	8	2008221	8	24	2.73668343836402e-18	2.09536579708721
2008221	8	2008222	8	24	4.90778562993983e-18	3.94592098506715
2008222	8	2008223	8	24	2.88054448360406e-19	0.16985307684283
2008223	8	2008224	8	24	2.04475791966845e-19	0.426604849884964
2008224	8	2008225	8	24	0	0
2008225	8	2008226	8	24	1.64286033333975e-18	1.98927981405745
2008226	8	2008227	8	24	0	2.65832529322552e-07
2008227	8	2008228	8	24	0	0
2008228	8	2008229	8	24	0	0
2008229	8	2008230	8	24	0	0
2008230	8	2008231	8	24	2.7858222428526e-26	1.50124986227074e-11
2008231	8	2008232	8	24	2.39335386898053e-20	0.00921284971236735
2008232	8	2008233	8	24	4.36024901526207e-21	0.0676926057605908
2008233	8	2008234	8	24	0	0
2008234	8	2008235	8	24	0	0.0261371934902854
2008235	8	2008236	8	24	4.03313988274969e-18	5.38673806459184
2008236	8	2008237	8	24	2.67027137286212e-18	2.12400255590723
2008237	8	2008238	8	24	3.68504324905472e-20	0.0346598005961982
2008238	8	2008239	8	24	8.11717862923573e-19	0.807751332057363
2008239	8	2008240	8	24	3.58052620550592e-29	3.00590262750089e-08
2008240	8	2008241	8	24	0	0
2008241	8	2008242	8	24	3.91070606059496e-20	0.200866482646205
2008242	8	2008243	8	24	0	0
2008243	8	2008244	8	16	0	0
