# Supplementary material for: A comparison of sea salt emission parameterizations in northwestern Europe using a chemistry transport model setup
Source: Copernicus journal article supplement (doi:10.5194/acp-16-9905-2016), 2016-08-08
Supplement: Supplementary file 2 [file acp-16-9905-2016-supplement.zip › wetdep/wetdep.timeseries.values.DE0007R.base.moreStations.csv]

doy_start	hour_start	doy_end	hour_end	n_vals	Na in kg/ha/d	precip in mm/d
2008001	8	2008002	8	24	8.62298116059284e-13	2.53924676803848e-09
2008002	8	2008003	8	24	0	0
2008003	8	2008004	8	24	0	0
2008004	8	2008005	8	24	0	0
2008005	8	2008006	8	24	0.00133741983890299	2.34241405780721
2008006	8	2008007	8	24	0.000916779208037457	3.55105906741719
2008007	8	2008008	8	24	0.0250455313639953	3.18664053599113
2008008	8	2008009	8	24	0.00486503471943946	3.72698333715395
2008009	8	2008010	8	24	8.49970458867346e-05	0.876869946230457
2008010	8	2008011	8	24	1.80050486992733e-09	0.171858107419236
2008011	8	2008012	8	24	0	0.95579338218216
2008012	8	2008013	8	24	0.00256791627084716	0.526130162205766
2008013	8	2008014	8	24	6.9959257696285e-05	0.0728717029642766
2008014	8	2008015	8	24	2.23040832651122e-06	0.260759054449945
2008015	8	2008016	8	24	7.48520895228921e-06	0.740323024664957
2008016	8	2008017	8	24	0.000495755660999978	1.79547328156842
2008017	8	2008018	8	24	0.00431908157102585	2.85155073726707
2008018	8	2008019	8	24	0.0463210117161411	4.81850933935107
2008019	8	2008020	8	24	0.0080799170172714	0.913639365533758
2008020	8	2008021	8	24	0.000769774823626548	3.49537371067691
2008021	8	2008022	8	24	0.00737262692633294	18.0303876679318
2008022	8	2008023	8	24	2.68613787422355e-13	6.43075310621933e-09
2008023	8	2008024	8	24	0.00796325766265901	3.48108600184681
2008024	8	2008025	8	24	0.00330431596973727	1.09428584070192
2008025	8	2008026	8	24	2.26456372883176e-05	0.00104453869132559
2008026	8	2008027	8	24	0.104699047791235	7.2138034997318
2008027	8	2008028	8	24	0.00352704094832042	0.199721501283383
2008028	8	2008029	8	24	0.0481324302191679	0.800155567694674
2008029	8	2008030	8	24	3.77261800484488e-16	1.12025425746823e-09
2008030	8	2008031	8	24	0.00206522114854225	1.15993921948287
2008031	8	2008032	8	24	0.00456974043314405	0.509123136676426
2008032	8	2008033	8	24	7.56925429776167e-05	0.0786371889285885
2008033	8	2008034	8	24	0.0130163219289442	0.341746008577107
2008034	8	2008035	8	24	7.71343391584153e-14	0
2008035	8	2008036	8	24	5.22092280921641e-05	0.00278303274265947
2008036	8	2008037	8	24	0.0312997209613399	6.80282292586721
2008037	8	2008038	8	24	0.0439422724237602	8.96994984534174
2008038	8	2008039	8	24	4.39803225332465e-12	5.92226094083346e-10
2008039	8	2008040	8	24	0.000490031949869364	0.0295525815912283
2008040	8	2008041	8	24	0	3.06768967867077e-10
2008041	8	2008042	8	24	0	0
2008042	8	2008043	8	24	0.0022494232554748	0.0442037606730185
2008043	8	2008044	8	24	0.0011742670373008	0.0387108932688355
2008044	8	2008045	8	24	0.000424954123023002	0.0193864188943899
2008045	8	2008046	8	24	9.1617150725587e-07	0.0018803825226889
2008046	8	2008047	8	24	0	0
2008047	8	2008048	8	24	0	0
2008048	8	2008049	8	24	0.0116243865280495	0.0621889622220754
2008049	8	2008050	8	24	0.00677578275520075	0.10974308569962
2008050	8	2008051	8	24	0.00356133205349041	0.691357447321368
2008051	8	2008052	8	24	0.000534458172486191	0.184626680649214
2008052	8	2008053	8	24	0.00583102443984966	1.85578798549685
2008053	8	2008054	8	24	0.0126405211180122	3.93256526361763
2008054	8	2008055	8	24	1.59330128202038e-05	0.0507796889486015
2008055	8	2008056	8	24	0.00131398561229333	1.64638904280773
2008056	8	2008057	8	24	0.00045138779078855	0.419330026363823
2008057	8	2008058	8	24	0.0220167332698384	5.71827346517239
2008058	8	2008059	8	24	0.068723191995531	2.05456275340011
2008059	8	2008060	8	24	0.00805225254392052	0.391107309147132
2008060	8	2008061	8	16	0.00037497741428524	2.27370893097261
2008182	8	2008183	8	8	0	0
2008183	8	2008184	8	24	0	0
2008184	8	2008185	8	24	0	0
2008185	8	2008186	8	24	0	0
2008186	8	2008187	8	24	0	0
2008187	8	2008188	8	24	4.75520287634564e-15	1.55733237416911e-08
2008188	8	2008189	8	24	0.000326016828385036	1.0908676457829
2008189	8	2008190	8	24	0.000255673846743737	0.490210112969248
2008190	8	2008191	8	24	0.00272886430051268	0.711131558445965
2008191	8	2008192	8	24	0.0119000668642653	4.75640291755873
2008192	8	2008193	8	24	0.0042580515403519	7.55724472535803
2008193	8	2008194	8	24	0.00049548800323123	1.75209036240992
2008194	8	2008195	8	24	0	0
2008195	8	2008196	8	24	2.27405689146032e-06	0.00100935626505816
2008196	8	2008197	8	24	3.65769048874278e-17	1.42341006874065e-14
2008197	8	2008198	8	24	0.000252815105783921	0.109449043149914
2008198	8	2008199	8	24	0.00064448573673122	2.15603752361253
2008199	8	2008200	8	24	0.000276936116550246	0.307298356195756
2008200	8	2008201	8	24	0.000162875893554053	0.363445031334625
2008201	8	2008202	8	24	0.00583156547552097	4.63635854589434
2008202	8	2008203	8	24	2.20714826163616e-05	0.473355636558275
2008203	8	2008204	8	24	0.00934509598610237	1.10457842627831
2008204	8	2008205	8	24	0	0
2008205	8	2008206	8	24	0	0
2008206	8	2008207	8	24	5.22393401392838e-11	0.0283520360316385
2008207	8	2008208	8	24	0	0
2008208	8	2008209	8	24	0	0
2008209	8	2008210	8	24	0	0
2008210	8	2008211	8	24	0	0
2008211	8	2008212	8	24	0	0
2008212	8	2008213	8	24	0	0
2008213	8	2008214	8	24	0	0
2008214	8	2008215	8	24	0.000319728151098407	2.07456253489635
2008215	8	2008216	8	24	1.35649742713616e-05	0.00518824325046232
2008216	8	2008217	8	24	0.00115945576854611	16.7394264108734
2008217	8	2008218	8	24	0.0057497538190546	4.1600008140631
2008218	8	2008219	8	24	0	0
2008219	8	2008220	8	24	0	0
2008220	8	2008221	8	24	8.06917119643913e-05	0.864381167652512
2008221	8	2008222	8	24	0.000927450533945375	1.31419139783247
2008222	8	2008223	8	24	2.03842070970537e-14	1.40101209279708e-09
2008223	8	2008224	8	24	0.0010166800437034	1.00352113851062
2008224	8	2008225	8	24	0	3.57661816829946e-11
2008225	8	2008226	8	24	0.000324942680185749	1.59531859905032
2008226	8	2008227	8	24	0	0
2008227	8	2008228	8	24	0	0
2008228	8	2008229	8	24	0	0.267093062770458
2008229	8	2008230	8	24	0.000142955143797241	0.337073022132776
2008230	8	2008231	8	24	0	0.296561422262773
2008231	8	2008232	8	24	0	6.4316654970753e-05
2008232	8	2008233	8	24	8.7042913306766e-11	1.78066567671498e-07
2008233	8	2008234	8	24	0	0
2008234	8	2008235	8	24	0.000784822498681024	0.138478719163686
2008235	8	2008236	8	24	0.0013727121975218	4.71816187553514
2008236	8	2008237	8	24	0.00112912303081786	0.738215154885052
2008237	8	2008238	8	24	0.000597644727076034	0.190894192880933
2008238	8	2008239	8	24	8.35250145059952e-10	1.31006194028891e-06
2008239	8	2008240	8	24	0.00973598533816126	0.380008129627778
2008240	8	2008241	8	24	1.42810352047882e-05	0.0334616063643213
2008241	8	2008242	8	24	0.00132023222384288	0.615859076237834
2008242	8	2008243	8	24	0	0
2008243	8	2008244	8	16	0	0
