# Supplementary material for: A comparison of sea salt emission parameterizations in northwestern Europe using a chemistry transport model setup
Source: Copernicus journal article supplement (doi:10.5194/acp-16-9905-2016), 2016-08-08
Supplement: Supplementary file 2 [file acp-16-9905-2016-supplement.zip › wetdep/wetdep.timeseries.values.DE0007R.zero.moreStations.csv]

doy_start	hour_start	doy_end	hour_end	n_vals	Na in kg/ha/d	precip in mm/d
2008001	8	2008002	8	24	8.92947007634391e-29	2.53924676803848e-09
2008002	8	2008003	8	24	0	0
2008003	8	2008004	8	24	0	0
2008004	8	2008005	8	24	0	0
2008005	8	2008006	8	24	4.26220961506793e-20	2.34241405780721
2008006	8	2008007	8	24	6.05096377341088e-20	3.55105906741719
2008007	8	2008008	8	24	1.25964530813488e-18	3.18664053599113
2008008	8	2008009	8	24	4.27973613576985e-19	3.72698333715395
2008009	8	2008010	8	24	3.7717693666279e-20	0.876869946230457
2008010	8	2008011	8	24	7.18369983781322e-25	0.171858107419236
2008011	8	2008012	8	24	0	0.95579338218216
2008012	8	2008013	8	24	2.087380561756e-19	0.526130162205766
2008013	8	2008014	8	24	1.08908676993211e-20	0.0728717029642766
2008014	8	2008015	8	24	9.73903055698255e-22	0.260759054449945
2008015	8	2008016	8	24	4.17028416808876e-21	0.740323024664957
2008016	8	2008017	8	24	7.04963324965569e-20	1.79547328156842
2008017	8	2008018	8	24	3.35096008176465e-19	2.85155073726707
2008018	8	2008019	8	24	2.2514693062888e-18	4.81850933935107
2008019	8	2008020	8	24	1.53018003977369e-19	0.913639365533758
2008020	8	2008021	8	24	1.22365319321528e-19	3.49537371067691
2008021	8	2008022	8	24	2.78971258120755e-19	18.0303876679318
2008022	8	2008023	8	24	1.45855047226504e-29	6.43075310621933e-09
2008023	8	2008024	8	24	2.97176011376098e-19	3.48108600184681
2008024	8	2008025	8	24	1.24382057609011e-19	1.09428584070192
2008025	8	2008026	8	24	4.66865742527375e-24	0.00104453869132559
2008026	8	2008027	8	24	4.79108549559231e-18	7.2138034997318
2008027	8	2008028	8	24	1.33722175787461e-20	0.199721501283383
2008028	8	2008029	8	24	6.77466794214961e-20	0.800155567694674
2008029	8	2008030	8	24	1.42217628738441e-32	1.12025425746823e-09
2008030	8	2008031	8	24	1.07853435387191e-19	1.15993921948287
2008031	8	2008032	8	24	2.92893804113391e-19	0.509123136676426
2008032	8	2008033	8	24	3.87188899918501e-21	0.0786371889285885
2008033	8	2008034	8	24	4.16499828780471e-19	0.341746008577107
2008034	8	2008035	8	24	1.44949271352224e-29	0
2008035	8	2008036	8	24	4.43723229651081e-21	0.00278303274265947
2008036	8	2008037	8	24	1.41807930705793e-18	6.80282292586721
2008037	8	2008038	8	24	1.56410866109951e-18	8.96994984534174
2008038	8	2008039	8	24	4.273677537047e-28	5.92226094083346e-10
2008039	8	2008040	8	24	3.53379237089288e-20	0.0295525815912283
2008040	8	2008041	8	24	0	3.06768967867077e-10
2008041	8	2008042	8	24	0	0
2008042	8	2008043	8	24	8.34512125284169e-20	0.0442037606730185
2008043	8	2008044	8	24	4.73879834939722e-20	0.0387108932688355
2008044	8	2008045	8	24	1.33673955095295e-20	0.0193864188943899
2008045	8	2008046	8	24	2.35933254095045e-23	0.0018803825226889
2008046	8	2008047	8	24	0	0
2008047	8	2008048	8	24	0	0
2008048	8	2008049	8	24	2.07789230654706e-20	0.0621889622220754
2008049	8	2008050	8	24	1.11279330160242e-20	0.10974308569962
2008050	8	2008051	8	24	5.21833091983715e-20	0.691357447321368
2008051	8	2008052	8	24	3.64761783756404e-20	0.184626680649214
2008052	8	2008053	8	24	5.76607901240885e-20	1.85578798549685
2008053	8	2008054	8	24	1.88955162777239e-19	3.93256526361763
2008054	8	2008055	8	24	3.70154026171258e-22	0.0507796889486015
2008055	8	2008056	8	24	3.97238961250613e-19	1.64638904280773
2008056	8	2008057	8	24	2.82416242167861e-19	0.419330026363823
2008057	8	2008058	8	24	1.06286241996511e-18	5.71827346517239
2008058	8	2008059	8	24	3.39899281439879e-18	2.05456275340011
2008059	8	2008060	8	24	5.86741040906488e-19	0.391107309147132
2008060	8	2008061	8	16	1.08921247269446e-19	2.27370893097261
2008182	8	2008183	8	8	0	0
2008183	8	2008184	8	24	0	0
2008184	8	2008185	8	24	0	0
2008185	8	2008186	8	24	0	0
2008186	8	2008187	8	24	0	0
2008187	8	2008188	8	24	4.33585646952667e-30	1.55733237416911e-08
2008188	8	2008189	8	24	1.42325514897885e-18	1.0908676457829
2008189	8	2008190	8	24	3.41752023525986e-19	0.490210112969248
2008190	8	2008191	8	24	1.50285280290267e-18	0.711131558445965
2008191	8	2008192	8	24	1.91344171929209e-18	4.75640291755873
2008192	8	2008193	8	24	2.06870578679054e-18	7.55724472535803
2008193	8	2008194	8	24	1.65186898288746e-18	1.75209036240992
2008194	8	2008195	8	24	0	0
2008195	8	2008196	8	24	1.33823380341127e-21	0.00100935626505816
2008196	8	2008197	8	24	3.09407362965011e-33	1.42341006874065e-14
2008197	8	2008198	8	24	6.26977141975719e-19	0.109449043149914
2008198	8	2008199	8	24	1.60937870098304e-18	2.15603752361253
2008199	8	2008200	8	24	7.26908484119282e-20	0.307298356195756
2008200	8	2008201	8	24	2.34801781392014e-20	0.363445031334625
2008201	8	2008202	8	24	7.79067712438099e-18	4.63635854589434
2008202	8	2008203	8	24	2.66665554070893e-22	0.473355636558275
2008203	8	2008204	8	24	7.34330324182717e-19	1.10457842627831
2008204	8	2008205	8	24	0	0
2008205	8	2008206	8	24	0	0
2008206	8	2008207	8	24	1.08103583112753e-25	0.0283520360316385
2008207	8	2008208	8	24	0	0
2008208	8	2008209	8	24	0	0
2008209	8	2008210	8	24	0	0
2008210	8	2008211	8	24	0	0
2008211	8	2008212	8	24	0	0
2008212	8	2008213	8	24	0	0
2008213	8	2008214	8	24	0	0
2008214	8	2008215	8	24	2.54519249554195e-18	2.07456253489635
2008215	8	2008216	8	24	6.07557008881562e-21	0.00518824325046232
2008216	8	2008217	8	24	9.30490413771792e-18	16.7394264108734
2008217	8	2008218	8	24	5.44085274466778e-18	4.1600008140631
2008218	8	2008219	8	24	0	0
2008219	8	2008220	8	24	0	0
2008220	8	2008221	8	24	1.16101097383495e-18	0.864381167652512
2008221	8	2008222	8	24	1.48829086315324e-18	1.31419139783247
2008222	8	2008223	8	24	2.96638041310711e-29	1.40101209279708e-09
2008223	8	2008224	8	24	4.76242307655573e-19	1.00352113851062
2008224	8	2008225	8	24	0	3.57661816829946e-11
2008225	8	2008226	8	24	1.34308672593387e-18	1.59531859905032
2008226	8	2008227	8	24	0	0
2008227	8	2008228	8	24	0	0
2008228	8	2008229	8	24	0	0.267093062770458
2008229	8	2008230	8	24	1.43160628877484e-19	0.337073022132776
2008230	8	2008231	8	24	0	0.296561422262773
2008231	8	2008232	8	24	0	6.4316654970753e-05
2008232	8	2008233	8	24	3.36049626213469e-26	1.78066567671498e-07
2008233	8	2008234	8	24	0	0
2008234	8	2008235	8	24	2.39684998646044e-19	0.138478719163686
2008235	8	2008236	8	24	4.25201791651222e-18	4.71816187553514
2008236	8	2008237	8	24	1.08112150598259e-18	0.738215154885052
2008237	8	2008238	8	24	3.89855793065359e-19	0.190894192880933
2008238	8	2008239	8	24	8.19941604087275e-25	1.31006194028891e-06
2008239	8	2008240	8	24	4.5894084036581e-19	0.380008129627778
2008240	8	2008241	8	24	5.31156651591057e-21	0.0334616063643213
2008241	8	2008242	8	24	4.43425061027207e-19	0.615859076237834
2008242	8	2008243	8	24	0	0
2008243	8	2008244	8	16	0	0
