# Supplementary material for: A comparison of sea salt emission parameterizations in northwestern Europe using a chemistry transport model setup
Source: Copernicus journal article supplement (doi:10.5194/acp-16-9905-2016), 2016-08-08
Supplement: Supplementary file 2 [file acp-16-9905-2016-supplement.zip › wetdep/wetdep.timeseries.values.LT0015R.base.moreStations.csv]

doy_start	hour_start	doy_end	hour_end	n_vals	Na in kg/ha/d	precip in mm/d
2008001	8	2008002	8	24	0	0
2008002	8	2008003	8	24	0	0
2008003	8	2008004	8	24	0	0
2008004	8	2008005	8	24	0	0
2008005	8	2008006	8	24	0	0
2008006	8	2008007	8	24	0	0
2008007	8	2008008	8	24	0.00160502405262378	0.328913297482121
2008008	8	2008009	8	24	0.0774934898227746	4.96895127753305
2008009	8	2008010	8	24	0.000163991529155983	2.26518348324498
2008010	8	2008011	8	24	2.72046389926159e-05	0.100248170893605
2008011	8	2008012	8	24	0.000129734633687848	0.571249844828236
2008012	8	2008013	8	24	0.00597689096532559	0.295138466482321
2008013	8	2008014	8	24	0.00102274810509113	0.0396541562375688
2008014	8	2008015	8	24	1.8312066318098e-05	0.00391068438703303
2008015	8	2008016	8	24	2.54378433804138e-09	0.00113581741603434
2008016	8	2008017	8	24	0.00075074498620949	0.167386833862403
2008017	8	2008018	8	24	1.82822026371084e-08	0.452340243333902
2008018	8	2008019	8	24	0.00587444837132217	4.03781145510071
2008019	8	2008020	8	24	0.0197755074422132	4.8733241396166
2008020	8	2008021	8	24	0.000658403379233583	0.639665758026952
2008021	8	2008022	8	24	0.0713580474392645	3.96719698589043
2008022	8	2008023	8	24	0.021649395819184	1.28348819128397
2008023	8	2008024	8	24	0.00183939538521372	0.586191532897544
2008024	8	2008025	8	24	0.0105944977773755	2.24506875791532
2008025	8	2008026	8	24	0.18615660099664	9.00447861074841
2008026	8	2008027	8	24	0.0647863264647026	11.5442883677384
2008027	8	2008028	8	24	0.0155753460985762	0.339720257024675
2008028	8	2008029	8	24	0.00982428672962755	1.23290864682181
2008029	8	2008030	8	24	0.00939757442408202	0.639174203778131
2008030	8	2008031	8	24	0.00384872409534617	4.43129467676863
2008031	8	2008032	8	24	2.68744799159084e-05	0.0301983467125573
2008032	8	2008033	8	24	0.0388099530467286	2.89689023877145
2008033	8	2008034	8	24	0.206356467372362	3.11181540453317
2008034	8	2008035	8	24	1.61637451471996e-05	0.0984790878669615
2008035	8	2008036	8	24	0.00152391190311986	2.38045922848529
2008036	8	2008037	8	24	0.00336860143560181	1.23622020073576
2008037	8	2008038	8	24	0.0151891389753143	3.54918075705491
2008038	8	2008039	8	24	0.00158817941260684	0.293813513114554
2008039	8	2008040	8	24	0.00483706648319895	1.33497216833149
2008040	8	2008041	8	24	0.00281617726766736	0.589814356105742
2008041	8	2008042	8	24	0.0028476317341665	5.12341718795142
2008042	8	2008043	8	24	0.0098523053355666	3.28418838878861
2008043	8	2008044	8	24	0.00278939789745436	1.27510775797418
2008044	8	2008045	8	24	9.28237541752198e-06	0.808462812736536
2008045	8	2008046	8	24	0	0
2008046	8	2008047	8	24	0	0
2008047	8	2008048	8	24	0	0
2008048	8	2008049	8	24	0.0228474074977748	1.56283386235954
2008049	8	2008050	8	24	5.20922567880993e-07	0.0443585392978735
2008050	8	2008051	8	24	0	5.947413384133e-16
2008051	8	2008052	8	24	0.00463094754202757	1.8559783299163
2008052	8	2008053	8	24	0.0459946597239218	5.12700761458291
2008053	8	2008054	8	24	0.0262413468826019	2.92727304816057
2008054	8	2008055	8	24	0.0114029689366414	1.554338621926
2008055	8	2008056	8	24	0.0150129296210889	3.30861516562178
2008056	8	2008057	8	24	0	0.54554581348068
2008057	8	2008058	8	24	0.0249558133655751	6.06390834956984
2008058	8	2008059	8	24	0.206168094829627	5.08539210102754
2008059	8	2008060	8	24	0.0010346065570333	0.224888558554123
2008060	8	2008061	8	16	0.0124972893908401	4.52953119024566
2008182	8	2008183	8	8	0	0.0554549176013097
2008183	8	2008184	8	24	0	0
2008184	8	2008185	8	24	0	0
2008185	8	2008186	8	24	0	0
2008186	8	2008187	8	24	0	2.56502767115308e-05
2008187	8	2008188	8	24	0	0
2008188	8	2008189	8	24	0.000137496434094819	0.0411815303556183
2008189	8	2008190	8	24	0.00185973489244487	6.50680053565533
2008190	8	2008191	8	24	0.00845476456306642	2.43556629792044
2008191	8	2008192	8	24	0.00107210229842167	0.445465818528965
2008192	8	2008193	8	24	0	0.0385086773371768
2008193	8	2008194	8	24	1.57989815670589e-05	0.401368077264644
2008194	8	2008195	8	24	7.58435768942628e-05	0.460621797205189
2008195	8	2008196	8	24	0.00529778222733968	9.08468387831898
2008196	8	2008197	8	24	0.0105636134441454	8.25694990105112
2008197	8	2008198	8	24	0	0
2008198	8	2008199	8	24	0.000850858853409591	1.42186233761777
2008199	8	2008200	8	24	0.00172532566997688	0.477892537674356
2008200	8	2008201	8	24	0	0
2008201	8	2008202	8	24	0.00197471483676054	2.3855137396805
2008202	8	2008203	8	24	0.00221371914323873	0.81112767842472
2008203	8	2008204	8	24	0.000707635071157711	0.471485894349143
2008204	8	2008205	8	24	0	0.0248582725180313
2008205	8	2008206	8	24	0	0
2008206	8	2008207	8	24	0	0
2008207	8	2008208	8	24	0	0
2008208	8	2008209	8	24	0	0
2008209	8	2008210	8	24	0	0
2008210	8	2008211	8	24	0	0
2008211	8	2008212	8	24	0	0
2008212	8	2008213	8	24	0	0
2008213	8	2008214	8	24	0	0
2008214	8	2008215	8	24	0	0
2008215	8	2008216	8	24	0.00429547030782527	5.20831418381387
2008216	8	2008217	8	24	0.00451881697495992	2.65565806295407
2008217	8	2008218	8	24	0.0589001917788698	48.7106334529788
2008218	8	2008219	8	24	0.0585648411366377	18.365712329665
2008219	8	2008220	8	24	0	0
2008220	8	2008221	8	24	0	0
2008221	8	2008222	8	24	0.00419176384843692	1.53909411070179
2008222	8	2008223	8	24	0.0025471758853776	1.11476874200917
2008223	8	2008224	8	24	0.00131130862073091	0.784168692371228
2008224	8	2008225	8	24	0.000416812552618192	1.00654327765398
2008225	8	2008226	8	24	0.000138334703151486	0.387756541270019
2008226	8	2008227	8	24	5.30846169089472e-05	0.613295351008424
2008227	8	2008228	8	24	0	0
2008228	8	2008229	8	24	0.00402883904006746	11.3810837309334
2008229	8	2008230	8	24	0.000468251399513897	1.86947165851518
2008230	8	2008231	8	24	0	0.0604533254227135
2008231	8	2008232	8	24	0.000265816915297396	0.304731555886599
2008232	8	2008233	8	24	0	0.0124432159509524
2008233	8	2008234	8	24	0	0.104447471398672
2008234	8	2008235	8	24	0.00649625168800412	1.62298891256796
2008235	8	2008236	8	24	4.41248726359284e-11	0.110637561010662
2008236	8	2008237	8	24	0.000667991246813058	2.14484971792659
2008237	8	2008238	8	24	9.91097666101271e-05	1.12677091247302
2008238	8	2008239	8	24	6.08316574666361e-06	0.00184665370122977
2008239	8	2008240	8	24	0.00294775375794522	0.696711959028845
2008240	8	2008241	8	24	0.00350169224996193	1.18438018504733
2008241	8	2008242	8	24	0.0150740993415886	3.28497314620583
2008242	8	2008243	8	24	0.0143869410077359	3.64830919662047
2008243	8	2008244	8	16	0.000946105078085394	0.431238098317628
