# Supplementary material for: A comparison of sea salt emission parameterizations in northwestern Europe using a chemistry transport model setup
Source: Copernicus journal article supplement (doi:10.5194/acp-16-9905-2016), 2016-08-08
Supplement: Supplementary file 2 [file acp-16-9905-2016-supplement.zip › wetdep/wetdep.timeseries.values.LT0015R.ov14.moreStations.csv]

doy_start	hour_start	doy_end	hour_end	n_vals	Na in kg/ha/d	precip in mm/d
2008001	8	2008002	8	24	0	0
2008002	8	2008003	8	24	0	0
2008003	8	2008004	8	24	0	0
2008004	8	2008005	8	24	0	0
2008005	8	2008006	8	24	0	0
2008006	8	2008007	8	24	0	0
2008007	8	2008008	8	24	0.000531170076991572	0.328913297482121
2008008	8	2008009	8	24	0.0430011609472936	4.96895127753305
2008009	8	2008010	8	24	0.000183862589374056	2.26518348324498
2008010	8	2008011	8	24	3.27221050157539e-05	0.100248170893605
2008011	8	2008012	8	24	0.000119686812761633	0.571249844828236
2008012	8	2008013	8	24	0.00259359628180324	0.295138466482321
2008013	8	2008014	8	24	0.000805325811194992	0.0396541562375688
2008014	8	2008015	8	24	4.22046064537218e-06	0.00391068438703303
2008015	8	2008016	8	24	1.98086132370632e-09	0.00113581741603434
2008016	8	2008017	8	24	0.000257587565074003	0.167386833862403
2008017	8	2008018	8	24	6.27568815212204e-09	0.452340243333902
2008018	8	2008019	8	24	0.00262130297415586	4.03781145510071
2008019	8	2008020	8	24	0.00818026370940981	4.8733241396166
2008020	8	2008021	8	24	0.000252191026919775	0.639665758026952
2008021	8	2008022	8	24	0.0307599848579886	3.96719698589043
2008022	8	2008023	8	24	0.010107800907191	1.28348819128397
2008023	8	2008024	8	24	0.00179010133262182	0.586191532897544
2008024	8	2008025	8	24	0.00612139394857722	2.24506875791532
2008025	8	2008026	8	24	0.0864729814435624	9.00447861074841
2008026	8	2008027	8	24	0.038811053147181	11.5442883677384
2008027	8	2008028	8	24	0.00521131727768222	0.339720257024675
2008028	8	2008029	8	24	0.00666713665537785	1.23290864682181
2008029	8	2008030	8	24	0.00741940458222361	0.639174203778131
2008030	8	2008031	8	24	0.00392717874963781	4.43129467676863
2008031	8	2008032	8	24	2.02723572908051e-05	0.0301983467125573
2008032	8	2008033	8	24	0.0183359228046567	2.89689023877145
2008033	8	2008034	8	24	0.0862055070893442	3.11181540453317
2008034	8	2008035	8	24	1.01347749017711e-05	0.0984790878669615
2008035	8	2008036	8	24	0.000315242437412704	2.38045922848529
2008036	8	2008037	8	24	0.000934643389737292	1.23622020073576
2008037	8	2008038	8	24	0.00519059170863329	3.54918075705491
2008038	8	2008039	8	24	0.000596460985014544	0.293813513114554
2008039	8	2008040	8	24	0.00201991342990748	1.33497216833149
2008040	8	2008041	8	24	0.00262507911067767	0.589814356105742
2008041	8	2008042	8	24	0.000992318707371851	5.12341718795142
2008042	8	2008043	8	24	0.00162753546936386	3.28418838878861
2008043	8	2008044	8	24	0.00160955281863153	1.27510775797418
2008044	8	2008045	8	24	2.5426508507341e-06	0.808462812736536
2008045	8	2008046	8	24	0	0
2008046	8	2008047	8	24	0	0
2008047	8	2008048	8	24	0	0
2008048	8	2008049	8	24	0.0100402520944613	1.56283386235954
2008049	8	2008050	8	24	1.75487638253208e-07	0.0443585392978735
2008050	8	2008051	8	24	0	5.947413384133e-16
2008051	8	2008052	8	24	0.00392178678714117	1.8559783299163
2008052	8	2008053	8	24	0.0183377627955882	5.12700761458291
2008053	8	2008054	8	24	0.0122535675200793	2.92727304816057
2008054	8	2008055	8	24	0.00795744815295489	1.554338621926
2008055	8	2008056	8	24	0.0139321773585687	3.30861516562178
2008056	8	2008057	8	24	0	0.54554581348068
2008057	8	2008058	8	24	0.00901900960036841	6.06390834956984
2008058	8	2008059	8	24	0.0745105860182321	5.08539210102754
2008059	8	2008060	8	24	0.000604985116077739	0.224888558554123
2008060	8	2008061	8	16	0.00761638716583614	4.52953119024566
2008182	8	2008183	8	8	0	0.0554549176013097
2008183	8	2008184	8	24	0	0
2008184	8	2008185	8	24	0	0
2008185	8	2008186	8	24	0	0
2008186	8	2008187	8	24	0	2.56502767115308e-05
2008187	8	2008188	8	24	0	0
2008188	8	2008189	8	24	0.000144648958924643	0.0411815303556183
2008189	8	2008190	8	24	0.000282561593417266	6.50680053565533
2008190	8	2008191	8	24	0.00269703051610122	2.43556629792044
2008191	8	2008192	8	24	0.000555039340761141	0.445465818528965
2008192	8	2008193	8	24	0	0.0385086773371768
2008193	8	2008194	8	24	4.75888670985114e-05	0.401368077264644
2008194	8	2008195	8	24	0.000110388745225868	0.460621797205189
2008195	8	2008196	8	24	0.00289561585361429	9.08468387831898
2008196	8	2008197	8	24	0.00550144006085446	8.25694990105112
2008197	8	2008198	8	24	0	0
2008198	8	2008199	8	24	0.00032348156291846	1.42186233761777
2008199	8	2008200	8	24	0.00078207927159383	0.477892537674356
2008200	8	2008201	8	24	0	0
2008201	8	2008202	8	24	0.000962564985429708	2.3855137396805
2008202	8	2008203	8	24	0.000960384529625868	0.81112767842472
2008203	8	2008204	8	24	0.000214878368969949	0.471485894349143
2008204	8	2008205	8	24	0	0.0248582725180313
2008205	8	2008206	8	24	0	0
2008206	8	2008207	8	24	0	0
2008207	8	2008208	8	24	0	0
2008208	8	2008209	8	24	0	0
2008209	8	2008210	8	24	0	0
2008210	8	2008211	8	24	0	0
2008211	8	2008212	8	24	0	0
2008212	8	2008213	8	24	0	0
2008213	8	2008214	8	24	0	0
2008214	8	2008215	8	24	0	0
2008215	8	2008216	8	24	0.00381217398199683	5.20831418381387
2008216	8	2008217	8	24	0.00562338409217773	2.65565806295407
2008217	8	2008218	8	24	0.0942705608221772	48.7106334529788
2008218	8	2008219	8	24	0.0506618909452485	18.365712329665
2008219	8	2008220	8	24	0	0
2008220	8	2008221	8	24	0	0
2008221	8	2008222	8	24	0.00161169869245968	1.53909411070179
2008222	8	2008223	8	24	0.00201532848240324	1.11476874200917
2008223	8	2008224	8	24	0.00113185789314464	0.784168692371228
2008224	8	2008225	8	24	0.000490466593133441	1.00654327765398
2008225	8	2008226	8	24	0.000208596349147001	0.387756541270019
2008226	8	2008227	8	24	2.40963863290489e-05	0.613295351008424
2008227	8	2008228	8	24	0	0
2008228	8	2008229	8	24	0.00322833085680795	11.3810837309334
2008229	8	2008230	8	24	0.000363012451318711	1.86947165851518
2008230	8	2008231	8	24	0	0.0604533254227135
2008231	8	2008232	8	24	0.000178306713846979	0.304731555886599
2008232	8	2008233	8	24	0	0.0124432159509524
2008233	8	2008234	8	24	0	0.104447471398672
2008234	8	2008235	8	24	0.00494948560732155	1.62298891256796
2008235	8	2008236	8	24	4.45851905655353e-11	0.110637561010662
2008236	8	2008237	8	24	0.00317351057506318	2.14484971792659
2008237	8	2008238	8	24	5.25216761002206e-05	1.12677091247302
2008238	8	2008239	8	24	4.09403089696281e-06	0.00184665370122977
2008239	8	2008240	8	24	0.0016773517334285	0.696711959028845
2008240	8	2008241	8	24	0.00305222056267275	1.18438018504733
2008241	8	2008242	8	24	0.0166931467366437	3.28497314620583
2008242	8	2008243	8	24	0.0105441485261423	3.64830919662047
2008243	8	2008244	8	16	0.0013162110012147	0.431238098317628
