# Supplementary material for: A comparison of sea salt emission parameterizations in northwestern Europe using a chemistry transport model setup
Source: Copernicus journal article supplement (doi:10.5194/acp-16-9905-2016), 2016-08-08
Supplement: Supplementary file 2 [file acp-16-9905-2016-supplement.zip › wetdep/wetdep.timeseries.values.LT0015R.sp13.moreStations.csv]

doy_start	hour_start	doy_end	hour_end	n_vals	Na in kg/ha/d	precip in mm/d
2008001	8	2008002	8	24	0	0
2008002	8	2008003	8	24	0	0
2008003	8	2008004	8	24	0	0
2008004	8	2008005	8	24	0	0
2008005	8	2008006	8	24	0	0
2008006	8	2008007	8	24	0	0
2008007	8	2008008	8	24	0.00337571836570305	0.328913297482121
2008008	8	2008009	8	24	0.147385792860425	4.96895127753305
2008009	8	2008010	8	24	0.000308987564972408	2.26518348324498
2008010	8	2008011	8	24	3.61137766415875e-05	0.100248170893605
2008011	8	2008012	8	24	0.000156688116726349	0.571249844828236
2008012	8	2008013	8	24	0.0129153600777367	0.295138466482321
2008013	8	2008014	8	24	0.00176586164007694	0.0396541562375688
2008014	8	2008015	8	24	3.29287830711289e-05	0.00391068438703303
2008015	8	2008016	8	24	5.26945476820792e-09	0.00113581741603434
2008016	8	2008017	8	24	0.00171760512973755	0.167386833862403
2008017	8	2008018	8	24	3.99677616716588e-08	0.452340243333902
2008018	8	2008019	8	24	0.0153648575471449	4.03781145510071
2008019	8	2008020	8	24	0.0510546038521657	4.8733241396166
2008020	8	2008021	8	24	0.000991682513198668	0.639665758026952
2008021	8	2008022	8	24	0.135559068298208	3.96719698589043
2008022	8	2008023	8	24	0.0437823994847258	1.28348819128397
2008023	8	2008024	8	24	0.00342407657903095	0.586191532897544
2008024	8	2008025	8	24	0.0223862366762247	2.24506875791532
2008025	8	2008026	8	24	0.604598525683528	9.00447861074841
2008026	8	2008027	8	24	0.165514414339017	11.5442883677384
2008027	8	2008028	8	24	0.0372427697275441	0.339720257024675
2008028	8	2008029	8	24	0.0146592344674553	1.23290864682181
2008029	8	2008030	8	24	0.0163410159796058	0.639174203778131
2008030	8	2008031	8	24	0.00647068470572771	4.43129467676863
2008031	8	2008032	8	24	3.82832485439731e-05	0.0301983467125573
2008032	8	2008033	8	24	0.163942587218207	2.89689023877145
2008033	8	2008034	8	24	0.450414718032036	3.11181540453317
2008034	8	2008035	8	24	3.12944038638641e-05	0.0984790878669615
2008035	8	2008036	8	24	0.00253929813673048	2.38045922848529
2008036	8	2008037	8	24	0.00480916818092099	1.23622020073576
2008037	8	2008038	8	24	0.0292786517309742	3.54918075705491
2008038	8	2008039	8	24	0.00300128452745413	0.293813513114554
2008039	8	2008040	8	24	0.00902704480274451	1.33497216833149
2008040	8	2008041	8	24	0.00456805470265355	0.589814356105742
2008041	8	2008042	8	24	0.00236104860035994	5.12341718795142
2008042	8	2008043	8	24	0.00837659150113041	3.28418838878861
2008043	8	2008044	8	24	0.0040850455644977	1.27510775797418
2008044	8	2008045	8	24	8.79810593642562e-06	0.808462812736536
2008045	8	2008046	8	24	0	0
2008046	8	2008047	8	24	0	0
2008047	8	2008048	8	24	0	0
2008048	8	2008049	8	24	0.0483968612906392	1.56283386235954
2008049	8	2008050	8	24	9.63401099136338e-07	0.0443585392978735
2008050	8	2008051	8	24	0	5.947413384133e-16
2008051	8	2008052	8	24	0.00442778480239213	1.8559783299163
2008052	8	2008053	8	24	0.111134635017566	5.12700761458291
2008053	8	2008054	8	24	0.0609258561054256	2.92727304816057
2008054	8	2008055	8	24	0.0239352806190892	1.554338621926
2008055	8	2008056	8	24	0.0287566486394579	3.30861516562178
2008056	8	2008057	8	24	0	0.54554581348068
2008057	8	2008058	8	24	0.0617082133242843	6.06390834956984
2008058	8	2008059	8	24	0.570775673952594	5.08539210102754
2008059	8	2008060	8	24	0.00234511813929124	0.224888558554123
2008060	8	2008061	8	16	0.024096576240292	4.52953119024566
2008182	8	2008183	8	8	0	0.0554549176013097
2008183	8	2008184	8	24	0	0
2008184	8	2008185	8	24	0	0
2008185	8	2008186	8	24	0	0
2008186	8	2008187	8	24	0	2.56502767115308e-05
2008187	8	2008188	8	24	0	0
2008188	8	2008189	8	24	0.000319333615496499	0.0411815303556183
2008189	8	2008190	8	24	0.00223833330791627	6.50680053565533
2008190	8	2008191	8	24	0.0139272222164436	2.43556629792044
2008191	8	2008192	8	24	0.00147890395077411	0.445465818528965
2008192	8	2008193	8	24	0	0.0385086773371768
2008193	8	2008194	8	24	2.69050056704145e-05	0.401368077264644
2008194	8	2008195	8	24	0.000104977054692913	0.460621797205189
2008195	8	2008196	8	24	0.00890735869680442	9.08468387831898
2008196	8	2008197	8	24	0.0175638459967308	8.25694990105112
2008197	8	2008198	8	24	0	0
2008198	8	2008199	8	24	0.00111492358875694	1.42186233761777
2008199	8	2008200	8	24	0.00284791430400219	0.477892537674356
2008200	8	2008201	8	24	0	0
2008201	8	2008202	8	24	0.00255279837016133	2.3855137396805
2008202	8	2008203	8	24	0.00448079283291823	0.81112767842472
2008203	8	2008204	8	24	0.00142453250853578	0.471485894349143
2008204	8	2008205	8	24	0	0.0248582725180313
2008205	8	2008206	8	24	0	0
2008206	8	2008207	8	24	0	0
2008207	8	2008208	8	24	0	0
2008208	8	2008209	8	24	0	0
2008209	8	2008210	8	24	0	0
2008210	8	2008211	8	24	0	0
2008211	8	2008212	8	24	0	0
2008212	8	2008213	8	24	0	0
2008213	8	2008214	8	24	0	0
2008214	8	2008215	8	24	0	0
2008215	8	2008216	8	24	0.00593823611261913	5.20831418381387
2008216	8	2008217	8	24	0.00670835815428291	2.65565806295407
2008217	8	2008218	8	24	0.128700030323525	48.7106334529788
2008218	8	2008219	8	24	0.161572527698459	18.365712329665
2008219	8	2008220	8	24	0	0
2008220	8	2008221	8	24	0	0
2008221	8	2008222	8	24	0.0107099049413645	1.53909411070179
2008222	8	2008223	8	24	0.0041696905673256	1.11476874200917
2008223	8	2008224	8	24	0.00207195664564109	0.784168692371228
2008224	8	2008225	8	24	0.000802664338699384	1.00654327765398
2008225	8	2008226	8	24	0.000339481226360476	0.387756541270019
2008226	8	2008227	8	24	7.00060969859351e-05	0.613295351008424
2008227	8	2008228	8	24	0	0
2008228	8	2008229	8	24	0.00817398272612165	11.3810837309334
2008229	8	2008230	8	24	0.000821341452859143	1.86947165851518
2008230	8	2008231	8	24	0	0.0604533254227135
2008231	8	2008232	8	24	0.000372537607497771	0.304731555886599
2008232	8	2008233	8	24	0	0.0124432159509524
2008233	8	2008234	8	24	0	0.104447471398672
2008234	8	2008235	8	24	0.0113971289145411	1.62298891256796
2008235	8	2008236	8	24	6.83972063361682e-11	0.110637561010662
2008236	8	2008237	8	24	0.00117732433036535	2.14484971792659
2008237	8	2008238	8	24	0.000147696784578359	1.12677091247302
2008238	8	2008239	8	24	1.31247486601517e-05	0.00184665370122977
2008239	8	2008240	8	24	0.00500907218593213	0.696711959028845
2008240	8	2008241	8	24	0.00636016356958605	1.18438018504733
2008241	8	2008242	8	24	0.0335245186975383	3.28497314620583
2008242	8	2008243	8	24	0.0314312747752647	3.64830919662047
2008243	8	2008244	8	16	0.00112053443015969	0.431238098317628
