# Supplementary material for: A comparison of sea salt emission parameterizations in northwestern Europe using a chemistry transport model setup
Source: Copernicus journal article supplement (doi:10.5194/acp-16-9905-2016), 2016-08-08
Supplement: Supplementary file 2 [file acp-16-9905-2016-supplement.zip › wetdep/wetdep.timeseries.values.LT0015R.zero.moreStations.csv]

doy_start	hour_start	doy_end	hour_end	n_vals	Na in kg/ha/d	precip in mm/d
2008001	8	2008002	8	24	0	0
2008002	8	2008003	8	24	0	0
2008003	8	2008004	8	24	0	0
2008004	8	2008005	8	24	0	0
2008005	8	2008006	8	24	0	0
2008006	8	2008007	8	24	0	0
2008007	8	2008008	8	24	9.5982700578104e-20	0.328913297482121
2008008	8	2008009	8	24	1.05342250362309e-17	4.96895127753305
2008009	8	2008010	8	24	1.60359638053043e-20	2.26518348324498
2008010	8	2008011	8	24	4.65058615081329e-21	0.100248170893605
2008011	8	2008012	8	24	2.54934041903121e-19	0.571249844828236
2008012	8	2008013	8	24	1.31437918624155e-19	0.295138466482321
2008013	8	2008014	8	24	5.05155220961362e-20	0.0396541562375688
2008014	8	2008015	8	24	2.91729655288724e-21	0.00391068438703303
2008015	8	2008016	8	24	3.92897319997544e-25	0.00113581741603434
2008016	8	2008017	8	24	1.50836237424653e-19	0.167386833862403
2008017	8	2008018	8	24	1.75857076823982e-24	0.452340243333902
2008018	8	2008019	8	24	3.06789104740782e-19	4.03781145510071
2008019	8	2008020	8	24	6.69466758947235e-19	4.8733241396166
2008020	8	2008021	8	24	1.00873894172694e-20	0.639665758026952
2008021	8	2008022	8	24	6.71602164330817e-18	3.96719698589043
2008022	8	2008023	8	24	4.92480405771722e-18	1.28348819128397
2008023	8	2008024	8	24	1.74970160699413e-19	0.586191532897544
2008024	8	2008025	8	24	4.89109050177163e-19	2.24506875791532
2008025	8	2008026	8	24	1.31327260151883e-18	9.00447861074841
2008026	8	2008027	8	24	4.71871072045815e-18	11.5442883677384
2008027	8	2008028	8	24	1.19149605047996e-18	0.339720257024675
2008028	8	2008029	8	24	1.35879687110982e-19	1.23290864682181
2008029	8	2008030	8	24	1.54061622518059e-19	0.639174203778131
2008030	8	2008031	8	24	6.6583931933712e-20	4.43129467676863
2008031	8	2008032	8	24	2.23013683748789e-21	0.0301983467125573
2008032	8	2008033	8	24	4.28075859334511e-18	2.89689023877145
2008033	8	2008034	8	24	1.20281717107979e-17	3.11181540453317
2008034	8	2008035	8	24	2.59127046424689e-22	0.0984790878669615
2008035	8	2008036	8	24	5.70538481275898e-19	2.38045922848529
2008036	8	2008037	8	24	3.74192936277034e-19	1.23622020073576
2008037	8	2008038	8	24	5.96144885989706e-19	3.54918075705491
2008038	8	2008039	8	24	4.55306355177967e-20	0.293813513114554
2008039	8	2008040	8	24	2.64395583175977e-19	1.33497216833149
2008040	8	2008041	8	24	2.09994238988832e-19	0.589814356105742
2008041	8	2008042	8	24	2.03809107269562e-19	5.12341718795142
2008042	8	2008043	8	24	3.96150728418688e-19	3.28418838878861
2008043	8	2008044	8	24	1.02381543626228e-19	1.27510775797418
2008044	8	2008045	8	24	3.14297690083921e-22	0.808462812736536
2008045	8	2008046	8	24	0	0
2008046	8	2008047	8	24	0	0
2008047	8	2008048	8	24	0	0
2008048	8	2008049	8	24	7.51127333628186e-20	1.56283386235954
2008049	8	2008050	8	24	5.8679881868586e-25	0.0443585392978735
2008050	8	2008051	8	24	0	5.947413384133e-16
2008051	8	2008052	8	24	7.21126901037413e-20	1.8559783299163
2008052	8	2008053	8	24	1.32512630681966e-19	5.12700761458291
2008053	8	2008054	8	24	8.54271020430292e-19	2.92727304816057
2008054	8	2008055	8	24	4.24988715277944e-19	1.554338621926
2008055	8	2008056	8	24	2.43310617067522e-19	3.30861516562178
2008056	8	2008057	8	24	0	0.54554581348068
2008057	8	2008058	8	24	6.1336433633092e-19	6.06390834956984
2008058	8	2008059	8	24	1.20795641001581e-18	5.08539210102754
2008059	8	2008060	8	24	1.26086222729649e-20	0.224888558554123
2008060	8	2008061	8	16	1.94430005299349e-19	4.52953119024566
2008182	8	2008183	8	8	0	0.0554549176013097
2008183	8	2008184	8	24	0	0
2008184	8	2008185	8	24	0	0
2008185	8	2008186	8	24	0	0
2008186	8	2008187	8	24	0	2.56502767115308e-05
2008187	8	2008188	8	24	0	0
2008188	8	2008189	8	24	2.56219852716184e-19	0.0411815303556183
2008189	8	2008190	8	24	1.13237706040963e-18	6.50680053565533
2008190	8	2008191	8	24	2.6634244373769e-18	2.43556629792044
2008191	8	2008192	8	24	5.78150634769967e-19	0.445465818528965
2008192	8	2008193	8	24	0	0.0385086773371768
2008193	8	2008194	8	24	2.43548118739292e-19	0.401368077264644
2008194	8	2008195	8	24	3.9031508962456e-19	0.460621797205189
2008195	8	2008196	8	24	1.55467004015982e-17	9.08468387831898
2008196	8	2008197	8	24	1.17400251164545e-17	8.25694990105112
2008197	8	2008198	8	24	0	0
2008198	8	2008199	8	24	1.36442812220134e-18	1.42186233761777
2008199	8	2008200	8	24	4.96339586879098e-19	0.477892537674356
2008200	8	2008201	8	24	0	0
2008201	8	2008202	8	24	3.51066024162914e-18	2.3855137396805
2008202	8	2008203	8	24	3.00995694067139e-19	0.81112767842472
2008203	8	2008204	8	24	4.30544854359566e-19	0.471485894349143
2008204	8	2008205	8	24	0	0.0248582725180313
2008205	8	2008206	8	24	0	0
2008206	8	2008207	8	24	0	0
2008207	8	2008208	8	24	0	0
2008208	8	2008209	8	24	0	0
2008209	8	2008210	8	24	0	0
2008210	8	2008211	8	24	0	0
2008211	8	2008212	8	24	0	0
2008212	8	2008213	8	24	0	0
2008213	8	2008214	8	24	0	0
2008214	8	2008215	8	24	0	0
2008215	8	2008216	8	24	7.7873425836534e-18	5.20831418381387
2008216	8	2008217	8	24	2.66872519608229e-18	2.65565806295407
2008217	8	2008218	8	24	5.23489522982588e-17	48.7106334529788
2008218	8	2008219	8	24	2.18134758943849e-17	18.365712329665
2008219	8	2008220	8	24	0	0
2008220	8	2008221	8	24	0	0
2008221	8	2008222	8	24	2.29443465016281e-18	1.53909411070179
2008222	8	2008223	8	24	9.96935924923157e-19	1.11476874200917
2008223	8	2008224	8	24	6.19003954271855e-19	0.784168692371228
2008224	8	2008225	8	24	6.97526265027407e-19	1.00654327765398
2008225	8	2008226	8	24	3.3517817414608e-19	0.387756541270019
2008226	8	2008227	8	24	7.43920306817522e-20	0.613295351008424
2008227	8	2008228	8	24	0	0
2008228	8	2008229	8	24	5.71369637097488e-18	11.3810837309334
2008229	8	2008230	8	24	3.02684008228333e-18	1.86947165851518
2008230	8	2008231	8	24	0	0.0604533254227135
2008231	8	2008232	8	24	2.64459524325334e-19	0.304731555886599
2008232	8	2008233	8	24	0	0.0124432159509524
2008233	8	2008234	8	24	0	0.104447471398672
2008234	8	2008235	8	24	1.69032219060298e-18	1.62298891256796
2008235	8	2008236	8	24	5.77525370698118e-26	0.110637561010662
2008236	8	2008237	8	24	2.35740493824377e-18	2.14484971792659
2008237	8	2008238	8	24	3.59846866603185e-20	1.12677091247302
2008238	8	2008239	8	24	8.50839417128872e-22	0.00184665370122977
2008239	8	2008240	8	24	6.33574263481275e-19	0.696711959028845
2008240	8	2008241	8	24	1.1137052273562e-18	1.18438018504733
2008241	8	2008242	8	24	3.72865919476832e-18	3.28497314620583
2008242	8	2008243	8	24	5.12012184588586e-18	3.64830919662047
2008243	8	2008244	8	16	5.24546559504829e-19	0.431238098317628
