# Supplementary material for: A comparison of sea salt emission parameterizations in northwestern Europe using a chemistry transport model setup
Source: Copernicus journal article supplement (doi:10.5194/acp-16-9905-2016), 2016-08-08
Supplement: Supplementary file 2 [file acp-16-9905-2016-supplement.zip › wetdep/wetdep.timeseries.values.LV0010R.base.moreStations.csv]

doy_start	hour_start	doy_end	hour_end	n_vals	Na in kg/ha/d	precip in mm/d
2008001	0	2008002	0	24	2.79555715864766e-11	2.37281773656645e-09
2008002	0	2008003	0	24	0	0
2008003	0	2008004	0	24	0	0
2008004	0	2008005	0	24	0	0
2008005	0	2008006	0	24	0	0
2008006	0	2008007	0	24	0	0
2008007	0	2008008	0	24	0	5.43656018085759e-07
2008008	0	2008009	0	24	0.0134153592565642	1.95338897347529
2008009	0	2008010	0	24	0.0174207287513008	1.78295683356638
2008010	0	2008011	0	24	0.000270110808910073	2.22905471901846
2008011	0	2008012	0	24	0.00143825654694674	1.21741521155699
2008012	0	2008013	0	24	0.00236743447967481	0.0919981225274569
2008013	0	2008014	0	24	0.00937044075536619	0.511305646774538
2008014	0	2008015	0	24	0.00104247322183076	0.114972784692079
2008015	0	2008016	0	24	2.94539707699246e-06	0.0530217125174204
2008016	0	2008017	0	24	1.03178715934657e-05	0.0143801029037149
2008017	0	2008018	0	24	0.00343290982236833	0.662443156007519
2008018	0	2008019	0	24	0.00416024577364126	1.26993428771538
2008019	0	2008020	0	24	0.0332590601860832	7.9005850036095
2008020	0	2008021	0	24	0.0445054317079028	0.676635993094933
2008021	0	2008022	0	24	0.0957599942314869	5.32642606578076
2008022	0	2008023	0	24	0.0173154065365353	1.31244317611516
2008023	0	2008024	0	24	0	1.59683313915355e-06
2008024	0	2008025	0	24	0.0200679264440644	4.71619426237765
2008025	0	2008026	0	24	0.0890485371220006	7.14484365006599
2008026	0	2008027	0	24	0.00969773795327111	8.2893527723282
2008027	0	2008028	0	24	0.0174193716770969	0.721799684521342
2008028	0	2008029	0	24	0.00469224962659837	0.175402124717728
2008029	0	2008030	0	24	0.0221705916923286	2.10644878908012
2008030	0	2008031	0	24	0.00686909025459499	5.13632298240525
2008031	0	2008032	0	24	1.48357307535664e-05	0.0367550624273867
2008032	0	2008033	0	24	0.0235086841452949	2.11225225574738
2008033	0	2008034	0	24	0.0211777816842598	0.727118248669435
2008034	0	2008035	0	24	0	0.231313529420543
2008035	0	2008036	0	24	8.00703304500184e-06	0.000336145182939644
2008036	0	2008037	0	24	0.00371248814956503	1.8461223840859
2008037	0	2008038	0	24	0.00137645497359017	1.67830113737078
2008038	0	2008039	0	24	0.00791180125677325	0.675019217869135
2008039	0	2008040	0	24	0.00182835987228486	0.631998097135789
2008040	0	2008041	0	24	0.0167536124520636	2.60761972827936
2008041	0	2008042	0	24	0.000954938509139538	1.09603828614088
2008042	0	2008043	0	24	0.0167191144247431	5.20208762674883
2008043	0	2008044	0	24	0.00298388323772542	1.16781805991195
2008044	0	2008045	0	24	0.000543543214925792	0.816909789726997
2008045	0	2008046	0	24	0	0
2008046	0	2008047	0	24	0	0
2008047	0	2008048	0	24	0	0
2008048	0	2008049	0	24	0.0143225571724014	0.770330377050846
2008049	0	2008050	0	24	0.000460074814240605	0.193621824948652
2008050	0	2008051	0	24	0.000106814591574319	0.0362351263606059
2008051	0	2008052	0	24	0.00072470376047022	0.307093239279219
2008052	0	2008053	0	24	0.0133857359380464	1.68336259059288
2008053	0	2008054	0	24	0.113383994650217	7.88212909933495
2008054	0	2008055	0	24	0.0778299722147312	4.38639400769869
2008055	0	2008056	0	24	0.0418820744119876	4.75313449440085
2008056	0	2008057	0	24	0.0154999122576191	3.94195597447882
2008057	0	2008058	0	24	0.00854497882623917	8.55439972478393
2008058	0	2008059	0	24	0.268219650925562	2.81627009417168
2008059	0	2008060	0	24	0.0156459176035086	2.49873285039531
2008060	0	2008061	0	24	0.0141317770567612	3.27292451889541
2008183	0	2008184	0	24	0	0
2008184	0	2008185	0	24	0	0
2008185	0	2008186	0	24	0	0
2008186	0	2008187	0	24	9.91180973414885e-06	0.342304418450681
2008187	0	2008188	0	24	0	0
2008188	0	2008189	0	24	0	0
2008189	0	2008190	0	24	0.00239802135979531	11.041811416607
2008190	0	2008191	0	24	0.00151046518796647	1.04698192463616
2008191	0	2008192	0	24	0.00154380022642727	0.619010424197484
2008192	0	2008193	0	24	0	0
2008193	0	2008194	0	24	0.00161283347269375	2.48068306749058
2008194	0	2008195	0	24	0.000910011413403277	2.62671061808408
2008195	0	2008196	0	24	0.00390847763647685	4.50097643980419
2008196	0	2008197	0	24	0.00461959443033372	5.23418962989131
2008197	0	2008198	0	24	0	0
2008198	0	2008199	0	24	0.00156433764333997	2.65722586090704
2008199	0	2008200	0	24	0.00383316668958287	0.806044134949531
2008200	0	2008201	0	24	0	0.022906878075446
2008201	0	2008202	0	24	2.7635923284785e-09	0.00394156057872277
2008202	0	2008203	0	24	0.00400533112402627	3.90039080703369
2008203	0	2008204	0	24	0.00122132292858443	0.0874671327799703
2008204	0	2008205	0	24	0.00226951149539673	0.644341019797139
2008205	0	2008206	0	24	0	0
2008206	0	2008207	0	24	0	0
2008207	0	2008208	0	24	0	0
2008208	0	2008209	0	24	0	0
2008209	0	2008210	0	24	0	0
2008210	0	2008211	0	24	0	0
2008211	0	2008212	0	24	0	0
2008212	0	2008213	0	24	0	0
2008213	0	2008214	0	24	0	0
2008214	0	2008215	0	24	0	0
2008215	0	2008216	0	24	0.000847092820660578	2.12158940674271
2008216	0	2008217	0	24	0.00230883988690039	3.43472302759967
2008217	0	2008218	0	24	0.0161276334764443	17.3522117096193
2008218	0	2008219	0	24	0.0135643715474092	11.1723373094505
2008219	0	2008220	0	24	0	0
2008220	0	2008221	0	24	0	0
2008221	0	2008222	0	24	0.000408132709971064	1.01908728594132
2008222	0	2008223	0	24	0.00453793811189832	1.94760543455998
2008223	0	2008224	0	24	0.00142607424036843	0.676015857932218
2008224	0	2008225	0	24	0.00298031901329412	2.30413832781835
2008225	0	2008226	0	24	0.00176524509973952	1.87377480782329
2008226	0	2008227	0	24	0.000536225496964562	1.81480876114279
2008227	0	2008228	0	24	0	0
2008228	0	2008229	0	24	0.00280142905411367	6.61415564454112
2008229	0	2008230	0	24	0.000362360963475428	1.66455919387992
2008230	0	2008231	0	24	0.000327986295851588	0.665402784944338
2008231	0	2008232	0	24	0	0
2008232	0	2008233	0	24	0.00121918086012053	1.11645853591081
2008233	0	2008234	0	24	0.000393435389576275	1.72583696247903
2008234	0	2008235	0	24	0.00700054168235511	1.82226186600019
2008235	0	2008236	0	24	0.00753864216465445	2.5385325269599
2008236	0	2008237	0	24	0.00126560242856281	3.11871854816141
2008237	0	2008238	0	24	0	0.639434040935791
2008238	0	2008239	0	24	0.00486668113494566	1.77396250402669
2008239	0	2008240	0	24	0.00184373712043922	0.480240232008099
2008240	0	2008241	0	24	0.0049846497955088	0.415415403565012
2008241	0	2008242	0	24	0.0650477083750593	9.16897255775036
2008242	0	2008243	0	24	0.0118353213083447	3.30582267431204
2008243	0	2008244	0	24	0.00249788799977864	1.6318673351816
