# Supplementary material for: A comparison of sea salt emission parameterizations in northwestern Europe using a chemistry transport model setup
Source: Copernicus journal article supplement (doi:10.5194/acp-16-9905-2016), 2016-08-08
Supplement: Supplementary file 2 [file acp-16-9905-2016-supplement.zip › wetdep/wetdep.timeseries.values.LV0010R.ov14.moreStations.csv]

doy_start	hour_start	doy_end	hour_end	n_vals	Na in kg/ha/d	precip in mm/d
2008001	0	2008002	0	24	2.78494405368899e-11	2.37281773656645e-09
2008002	0	2008003	0	24	0	0
2008003	0	2008004	0	24	0	0
2008004	0	2008005	0	24	0	0
2008005	0	2008006	0	24	0	0
2008006	0	2008007	0	24	0	0
2008007	0	2008008	0	24	0	5.43656018085759e-07
2008008	0	2008009	0	24	0.00876214274086799	1.95338897347529
2008009	0	2008010	0	24	0.00992400145730265	1.78295683356638
2008010	0	2008011	0	24	0.0001441294977165	2.22905471901846
2008011	0	2008012	0	24	0.00122409307041063	1.21741521155699
2008012	0	2008013	0	24	0.000996428447846213	0.0919981225274569
2008013	0	2008014	0	24	0.00504027748352083	0.511305646774538
2008014	0	2008015	0	24	0.000555673968744732	0.114972784692079
2008015	0	2008016	0	24	1.68743882075259e-06	0.0530217125174204
2008016	0	2008017	0	24	8.43502344683674e-06	0.0143801029037149
2008017	0	2008018	0	24	0.00177108152824065	0.662443156007519
2008018	0	2008019	0	24	0.00124520318061801	1.26993428771538
2008019	0	2008020	0	24	0.0152659656224249	7.9005850036095
2008020	0	2008021	0	24	0.0174947932663475	0.676635993094933
2008021	0	2008022	0	24	0.0366556528594523	5.32642606578076
2008022	0	2008023	0	24	0.00775271150132237	1.31244317611516
2008023	0	2008024	0	24	0	1.59683313915355e-06
2008024	0	2008025	0	24	0.0157218767551166	4.71619426237765
2008025	0	2008026	0	24	0.0342610967551326	7.14484365006599
2008026	0	2008027	0	24	0.0104846937629968	8.2893527723282
2008027	0	2008028	0	24	0.00797048836393515	0.721799684521342
2008028	0	2008029	0	24	0.00294092547042624	0.175402124717728
2008029	0	2008030	0	24	0.0138743270545188	2.10644878908012
2008030	0	2008031	0	24	0.00757823854468825	5.13632298240525
2008031	0	2008032	0	24	1.20154714998687e-05	0.0367550624273867
2008032	0	2008033	0	24	0.0137163892346541	2.11225225574738
2008033	0	2008034	0	24	0.00798934150230773	0.727118248669435
2008034	0	2008035	0	24	0	0.231313529420543
2008035	0	2008036	0	24	2.99862352027843e-06	0.000336145182939644
2008036	0	2008037	0	24	0.000821513575401402	1.8461223840859
2008037	0	2008038	0	24	0.000525138240282104	1.67830113737078
2008038	0	2008039	0	24	0.00214195014990812	0.675019217869135
2008039	0	2008040	0	24	0.000741289631724129	0.631998097135789
2008040	0	2008041	0	24	0.0108667556272481	2.60761972827936
2008041	0	2008042	0	24	0.000247610389653801	1.09603828614088
2008042	0	2008043	0	24	0.00336269203516167	5.20208762674883
2008043	0	2008044	0	24	0.0014699101811334	1.16781805991195
2008044	0	2008045	0	24	0.000263778238185265	0.816909789726997
2008045	0	2008046	0	24	0	0
2008046	0	2008047	0	24	0	0
2008047	0	2008048	0	24	0	0
2008048	0	2008049	0	24	0.00618197176534116	0.770330377050846
2008049	0	2008050	0	24	0.000183533073949915	0.193621824948652
2008050	0	2008051	0	24	3.63798898685916e-05	0.0362351263606059
2008051	0	2008052	0	24	0.000299298614777399	0.307093239279219
2008052	0	2008053	0	24	0.0073942493687703	1.68336259059288
2008053	0	2008054	0	24	0.0475757556490735	7.88212909933495
2008054	0	2008055	0	24	0.030369933481889	4.38639400769869
2008055	0	2008056	0	24	0.0314803264419989	4.75313449440085
2008056	0	2008057	0	24	0.0147159011411895	3.94195597447882
2008057	0	2008058	0	24	0.00880419117370579	8.55439972478393
2008058	0	2008059	0	24	0.0974272519751989	2.81627009417168
2008059	0	2008060	0	24	0.0129081197344208	2.49873285039531
2008060	0	2008061	0	24	0.00730776803196292	3.27292451889541
2008183	0	2008184	0	24	0	0
2008184	0	2008185	0	24	0	0
2008185	0	2008186	0	24	0	0
2008186	0	2008187	0	24	2.2475551872958e-06	0.342304418450681
2008187	0	2008188	0	24	0	0
2008188	0	2008189	0	24	0	0
2008189	0	2008190	0	24	0.00063298127889599	11.041811416607
2008190	0	2008191	0	24	0.000906197796139168	1.04698192463616
2008191	0	2008192	0	24	0.000319429931769264	0.619010424197484
2008192	0	2008193	0	24	0	0
2008193	0	2008194	0	24	0.000558324692409258	2.48068306749058
2008194	0	2008195	0	24	0.00140201185468539	2.62671061808408
2008195	0	2008196	0	24	0.00236198479386132	4.50097643980419
2008196	0	2008197	0	24	0.00254416828794383	5.23418962989131
2008197	0	2008198	0	24	0	0
2008198	0	2008199	0	24	0.000691712639491016	2.65722586090704
2008199	0	2008200	0	24	0.00152538273629034	0.806044134949531
2008200	0	2008201	0	24	0	0.022906878075446
2008201	0	2008202	0	24	3.70638290635839e-09	0.00394156057872277
2008202	0	2008203	0	24	0.0018530228967029	3.90039080703369
2008203	0	2008204	0	24	0.000608353885105846	0.0874671327799703
2008204	0	2008205	0	24	0.000610250388963323	0.644341019797139
2008205	0	2008206	0	24	0	0
2008206	0	2008207	0	24	0	0
2008207	0	2008208	0	24	0	0
2008208	0	2008209	0	24	0	0
2008209	0	2008210	0	24	0	0
2008210	0	2008211	0	24	0	0
2008211	0	2008212	0	24	0	0
2008212	0	2008213	0	24	0	0
2008213	0	2008214	0	24	0	0
2008214	0	2008215	0	24	0	0
2008215	0	2008216	0	24	0.000861321149058725	2.12158940674271
2008216	0	2008217	0	24	0.00238189101000899	3.43472302759967
2008217	0	2008218	0	24	0.0164909136593042	17.3522117096193
2008218	0	2008219	0	24	0.0210345486873823	11.1723373094505
2008219	0	2008220	0	24	0	0
2008220	0	2008221	0	24	0	0
2008221	0	2008222	0	24	0.000585457162201463	1.01908728594132
2008222	0	2008223	0	24	0.00195833431668881	1.94760543455998
2008223	0	2008224	0	24	0.00117760962222778	0.676015857932218
2008224	0	2008225	0	24	0.00225121758760798	2.30413832781835
2008225	0	2008226	0	24	0.00158810860678186	1.87377480782329
2008226	0	2008227	0	24	0.000351579590845859	1.81480876114279
2008227	0	2008228	0	24	0	0
2008228	0	2008229	0	24	0.002390880989538	6.61415564454112
2008229	0	2008230	0	24	0.000229568220760018	1.66455919387992
2008230	0	2008231	0	24	0.000248262953400626	0.665402784944338
2008231	0	2008232	0	24	0	0
2008232	0	2008233	0	24	0.00096510137050957	1.11645853591081
2008233	0	2008234	0	24	0.000885228570848504	1.72583696247903
2008234	0	2008235	0	24	0.00514905016236298	1.82226186600019
2008235	0	2008236	0	24	0.00715817866366706	2.5385325269599
2008236	0	2008237	0	24	0.00650285860958762	3.11871854816141
2008237	0	2008238	0	24	0	0.639434040935791
2008238	0	2008239	0	24	0.00349551331195704	1.77396250402669
2008239	0	2008240	0	24	0.00122321955285607	0.480240232008099
2008240	0	2008241	0	24	0.00418642910292211	0.415415403565012
2008241	0	2008242	0	24	0.0606842662223062	9.16897255775036
2008242	0	2008243	0	24	0.0089819010954168	3.30582267431204
2008243	0	2008244	0	24	0.00313501474392581	1.6318673351816
