# Supplementary material for: A comparison of sea salt emission parameterizations in northwestern Europe using a chemistry transport model setup
Source: Copernicus journal article supplement (doi:10.5194/acp-16-9905-2016), 2016-08-08
Supplement: Supplementary file 2 [file acp-16-9905-2016-supplement.zip › wetdep/wetdep.timeseries.values.LV0010R.sp13.moreStations.csv]

doy_start	hour_start	doy_end	hour_end	n_vals	Na in kg/ha/d	precip in mm/d
2008001	0	2008002	0	24	2.7868298832349e-11	2.37281773656645e-09
2008002	0	2008003	0	24	0	0
2008003	0	2008004	0	24	0	0
2008004	0	2008005	0	24	0	0
2008005	0	2008006	0	24	0	0
2008006	0	2008007	0	24	0	0
2008007	0	2008008	0	24	0	5.43656018085759e-07
2008008	0	2008009	0	24	0.0277291898715941	1.95338897347529
2008009	0	2008010	0	24	0.0318334438225236	1.78295683356638
2008010	0	2008011	0	24	0.000508596509033452	2.22905471901846
2008011	0	2008012	0	24	0.00299401175179671	1.21741521155699
2008012	0	2008013	0	24	0.00532649143294645	0.0919981225274569
2008013	0	2008014	0	24	0.019236688164118	0.511305646774538
2008014	0	2008015	0	24	0.00154825353647933	0.114972784692079
2008015	0	2008016	0	24	5.20084530791544e-06	0.0530217125174204
2008016	0	2008017	0	24	1.98172194246744e-05	0.0143801029037149
2008017	0	2008018	0	24	0.00697866254093656	0.662443156007519
2008018	0	2008019	0	24	0.0107809261500183	1.26993428771538
2008019	0	2008020	0	24	0.0843740501465349	7.9005850036095
2008020	0	2008021	0	24	0.0889166047801351	0.676635993094933
2008021	0	2008022	0	24	0.180971068030814	5.32642606578076
2008022	0	2008023	0	24	0.033556565185728	1.31244317611516
2008023	0	2008024	0	24	0	1.59683313915355e-06
2008024	0	2008025	0	24	0.0426410063077771	4.71619426237765
2008025	0	2008026	0	24	0.253478463802978	7.14484365006599
2008026	0	2008027	0	24	0.0183316076485042	8.2893527723282
2008027	0	2008028	0	24	0.0382860907923896	0.721799684521342
2008028	0	2008029	0	24	0.00778652761694502	0.175402124717728
2008029	0	2008030	0	24	0.0339532723855313	2.10644878908012
2008030	0	2008031	0	24	0.0125145361658724	5.13632298240525
2008031	0	2008032	0	24	2.24940134402541e-05	0.0367550624273867
2008032	0	2008033	0	24	0.0618728447258661	2.11225225574738
2008033	0	2008034	0	24	0.0459361139889835	0.727118248669435
2008034	0	2008035	0	24	0	0.231313529420543
2008035	0	2008036	0	24	1.65344922720888e-05	0.000336145182939644
2008036	0	2008037	0	24	0.00512927905243114	1.8461223840859
2008037	0	2008038	0	24	0.00244526449098885	1.67830113737078
2008038	0	2008039	0	24	0.0150420106938027	0.675019217869135
2008039	0	2008040	0	24	0.00354675961078328	0.631998097135789
2008040	0	2008041	0	24	0.0258581327639317	2.60761972827936
2008041	0	2008042	0	24	0.000773519561598732	1.09603828614088
2008042	0	2008043	0	24	0.012272064670733	5.20208762674883
2008043	0	2008044	0	24	0.00521685284015803	1.16781805991195
2008044	0	2008045	0	24	0.000881106380590797	0.816909789726997
2008045	0	2008046	0	24	0	0
2008046	0	2008047	0	24	0	0
2008047	0	2008048	0	24	0	0
2008048	0	2008049	0	24	0.0290257163019049	0.770330377050846
2008049	0	2008050	0	24	0.000864415337903761	0.193621824948652
2008050	0	2008051	0	24	0.000200318557644228	0.0362351263606059
2008051	0	2008052	0	24	0.000659468153644411	0.307093239279219
2008052	0	2008053	0	24	0.0273293230906917	1.68336259059288
2008053	0	2008054	0	24	0.28069869563293	7.88212909933495
2008054	0	2008055	0	24	0.204971171353804	4.38639400769869
2008055	0	2008056	0	24	0.0890604430296346	4.75313449440085
2008056	0	2008057	0	24	0.0297429071646184	3.94195597447882
2008057	0	2008058	0	24	0.0197583262018497	8.55439972478393
2008058	0	2008059	0	24	0.738377478449297	2.81627009417168
2008059	0	2008060	0	24	0.0350409482771218	2.49873285039531
2008060	0	2008061	0	24	0.0273099497349322	3.27292451889541
2008183	0	2008184	0	24	0	0
2008184	0	2008185	0	24	0	0
2008185	0	2008186	0	24	0	0
2008186	0	2008187	0	24	6.71381677420868e-06	0.342304418450681
2008187	0	2008188	0	24	0	0
2008188	0	2008189	0	24	0	0
2008189	0	2008190	0	24	0.0033864178427271	11.041811416607
2008190	0	2008191	0	24	0.00291436808591243	1.04698192463616
2008191	0	2008192	0	24	0.00258346845454071	0.619010424197484
2008192	0	2008193	0	24	0	0
2008193	0	2008194	0	24	0.00198954610785222	2.48068306749058
2008194	0	2008195	0	24	0.001424273493756	2.62671061808408
2008195	0	2008196	0	24	0.00692865511867694	4.50097643980419
2008196	0	2008197	0	24	0.007792306968785	5.23418962989131
2008197	0	2008198	0	24	0	0
2008198	0	2008199	0	24	0.00179063807459897	2.65722586090704
2008199	0	2008200	0	24	0.00672150795115158	0.806044134949531
2008200	0	2008201	0	24	0	0.022906878075446
2008201	0	2008202	0	24	4.37670452383819e-09	0.00394156057872277
2008202	0	2008203	0	24	0.00710495274732239	3.90039080703369
2008203	0	2008204	0	24	0.00244297826460991	0.0874671327799703
2008204	0	2008205	0	24	0.00466140389093198	0.644341019797139
2008205	0	2008206	0	24	0	0
2008206	0	2008207	0	24	0	0
2008207	0	2008208	0	24	0	0
2008208	0	2008209	0	24	0	0
2008209	0	2008210	0	24	0	0
2008210	0	2008211	0	24	0	0
2008211	0	2008212	0	24	0	0
2008212	0	2008213	0	24	0	0
2008213	0	2008214	0	24	0	0
2008214	0	2008215	0	24	0	0
2008215	0	2008216	0	24	0.000838698090626053	2.12158940674271
2008216	0	2008217	0	24	0.00366579546796856	3.43472302759967
2008217	0	2008218	0	24	0.0334471925148682	17.3522117096193
2008218	0	2008219	0	24	0.0293608827159157	11.1723373094505
2008219	0	2008220	0	24	0	0
2008220	0	2008221	0	24	0	0
2008221	0	2008222	0	24	0.000424294008073777	1.01908728594132
2008222	0	2008223	0	24	0.0103002467164548	1.94760543455998
2008223	0	2008224	0	24	0.0020952367772662	0.676015857932218
2008224	0	2008225	0	24	0.00597095689202467	2.30413832781835
2008225	0	2008226	0	24	0.00336715675141277	1.87377480782329
2008226	0	2008227	0	24	0.000846909370497997	1.81480876114279
2008227	0	2008228	0	24	0	0
2008228	0	2008229	0	24	0.00613771473589622	6.61415564454112
2008229	0	2008230	0	24	0.000642593831429501	1.66455919387992
2008230	0	2008231	0	24	0.000426693023982807	0.665402784944338
2008231	0	2008232	0	24	0	0
2008232	0	2008233	0	24	0.00180660326896836	1.11645853591081
2008233	0	2008234	0	24	0.000927009061776047	1.72583696247903
2008234	0	2008235	0	24	0.0133371270314092	1.82226186600019
2008235	0	2008236	0	24	0.0135792439963552	2.5385325269599
2008236	0	2008237	0	24	0.00246665858663047	3.11871854816141
2008237	0	2008238	0	24	0	0.639434040935791
2008238	0	2008239	0	24	0.0114879540881486	1.77396250402669
2008239	0	2008240	0	24	0.00307735807736133	0.480240232008099
2008240	0	2008241	0	24	0.00960849778729573	0.415415403565012
2008241	0	2008242	0	24	0.145612277109758	9.16897255775036
2008242	0	2008243	0	24	0.0247379653555046	3.30582267431204
2008243	0	2008244	0	24	0.0027871749442852	1.6318673351816
