# Supplementary material for: A comparison of sea salt emission parameterizations in northwestern Europe using a chemistry transport model setup
Source: Copernicus journal article supplement (doi:10.5194/acp-16-9905-2016), 2016-08-08
Supplement: Supplementary file 2 [file acp-16-9905-2016-supplement.zip › wetdep/wetdep.timeseries.values.LV0016R.base.moreStations.csv]

doy_start	hour_start	doy_end	hour_end	n_vals	Na in kg/ha/d	precip in mm/d
2008001	0	2008002	0	24	0	0
2008002	0	2008003	0	24	0	0
2008003	0	2008004	0	24	0	0
2008004	0	2008005	0	24	0	0
2008005	0	2008006	0	24	0	0
2008006	0	2008007	0	24	0	0
2008007	0	2008008	0	24	0	0
2008008	0	2008009	0	24	0	0
2008009	0	2008010	0	24	9.44896014797602e-14	0.118263112081543
2008010	0	2008011	0	24	5.24634473050069e-12	1.36097236943496e-05
2008011	0	2008012	0	24	0.000123066126337903	0.715834479087818
2008012	0	2008013	0	24	0.000157687859146001	0.833198547095945
2008013	0	2008014	0	24	0.00117556805718776	0.0969023901878993
2008014	0	2008015	0	24	2.24463691208437e-08	4.23348864528051e-06
2008015	0	2008016	0	24	3.51397947465444e-13	7.63572977633201e-11
2008016	0	2008017	0	24	3.0831256405175e-16	1.18131215043057e-12
2008017	0	2008018	0	24	6.62699283876479e-13	5.14366998849783e-05
2008018	0	2008019	0	24	1.24036701368313e-05	0.0917842692996501
2008019	0	2008020	0	24	0.0150237950832133	1.62946249495568
2008020	0	2008021	0	24	9.76852478489086e-17	1.49539743129827e-07
2008021	0	2008022	0	24	1.24057552229862e-11	0.00165909640586322
2008022	0	2008023	0	24	0	0
2008023	0	2008024	0	24	0	0
2008024	0	2008025	0	24	0.0065704395010016	0.811690375084602
2008025	0	2008026	0	24	0.0290471653893596	1.80214284672754
2008026	0	2008027	0	24	0	0.182915963912553
2008027	0	2008028	0	24	0	0
2008028	0	2008029	0	24	0	0
2008029	0	2008030	0	24	0.000249957985895931	0.019230450555335
2008030	0	2008031	0	24	0.0023006825668773	2.06353394743928
2008031	0	2008032	0	24	7.69394508609556e-09	0.00815817733557204
2008032	0	2008033	0	24	0	0
2008033	0	2008034	0	24	6.94985344247497e-12	6.17414267281569e-09
2008034	0	2008035	0	24	0	0
2008035	0	2008036	0	24	0	0
2008036	0	2008037	0	24	0.000137509506595279	0.0538781728222932
2008037	0	2008038	0	24	1.4337896914178e-05	0.000345623768734018
2008038	0	2008039	0	24	0.000915312812210554	0.114320117210234
2008039	0	2008040	0	24	1.92432028053134e-13	3.11891435357751e-05
2008040	0	2008041	0	24	0.00529353466826706	1.47063182208432
2008041	0	2008042	0	24	0.00242381991833597	1.94671079574618
2008042	0	2008043	0	24	0.00169963997936179	1.58148720627651
2008043	0	2008044	0	24	7.85374794640617e-06	0.0418247683620866
2008044	0	2008045	0	24	2.08222393037345e-05	0.00315509664616672
2008045	0	2008046	0	24	0	0
2008046	0	2008047	0	24	0	0
2008047	0	2008048	0	24	0	0
2008048	0	2008049	0	24	8.76349324088277e-06	5.16950332011754e-07
2008049	0	2008050	0	24	0.000310528302002864	0.0206947277907926
2008050	0	2008051	0	24	0	0.00127441031509079
2008051	0	2008052	0	24	1.73158964804582e-17	0
2008052	0	2008053	0	24	8.3430041942356e-12	3.47757792741725e-09
2008053	0	2008054	0	24	0.0447559075989193	2.48063979745511
2008054	0	2008055	0	24	2.90196046880628e-05	0.252994177465863
2008055	0	2008056	0	24	0.00122968703028916	0.671531503208646
2008056	0	2008057	0	24	0.0053237311647686	3.12931596684408
2008057	0	2008058	0	24	0.00529929618161987	2.05045412399159
2008058	0	2008059	0	24	0.0388833176019762	5.08261018898338
2008059	0	2008060	0	24	2.98703819712341e-08	1.14641111127119
2008060	0	2008061	0	24	0.000179812278633623	0.00859568232113701
2008183	0	2008184	0	24	4.08891965210549e-14	6.59112025568287e-11
2008184	0	2008185	0	24	0	0
2008185	0	2008186	0	24	0.000411857477301965	1.14550070518817
2008186	0	2008187	0	24	0.000180645642177112	2.97394046718199
2008187	0	2008188	0	24	3.78560045874363e-05	0.491952003514122
2008188	0	2008189	0	24	3.44265768211212e-17	2.21928532530729e-06
2008189	0	2008190	0	24	0.000495281715060629	3.33657792337897
2008190	0	2008191	0	24	5.37254572473777e-07	0.518971311420993
2008191	0	2008192	0	24	0.00190820342404737	3.1619352006555
2008192	0	2008193	0	24	0	0
2008193	0	2008194	0	24	0	0
2008194	0	2008195	0	24	0.000187642211544237	2.3609341228563
2008195	0	2008196	0	24	2.23266889042861e-05	0.236651925740039
2008196	0	2008197	0	24	0.000407406855231746	5.11969350836181
2008197	0	2008198	0	24	0	0
2008198	0	2008199	0	24	0	0
2008199	0	2008200	0	24	0.00129237328638758	4.24898571270632
2008200	0	2008201	0	24	0	0
2008201	0	2008202	0	24	1.32062920137326e-11	9.58486993940522e-08
2008202	0	2008203	0	24	5.1766687713875e-05	0.576261403522563
2008203	0	2008204	0	24	8.10428965996957e-05	0.123423326883691
2008204	0	2008205	0	24	0	0.448523408078358
2008205	0	2008206	0	24	0	0
2008206	0	2008207	0	24	0	0
2008207	0	2008208	0	24	0	0
2008208	0	2008209	0	24	0	0
2008209	0	2008210	0	24	0	0
2008210	0	2008211	0	24	5.27355188936264e-14	0
2008211	0	2008212	0	24	2.03683552320467e-13	0.0100285949846522
2008212	0	2008213	0	24	8.01322382698881e-05	0.711094971650743
2008213	0	2008214	0	24	5.04992413369589e-15	9.27102470314745e-11
2008214	0	2008215	0	24	6.27086909846947e-10	5.52990773172723e-06
2008215	0	2008216	0	24	0	0
2008216	0	2008217	0	24	8.45462435770316e-05	0.743571393464054
2008217	0	2008218	0	24	0.0034626427531028	12.4499357968928
2008218	0	2008219	0	24	0.00124189131250247	3.50002202037629
2008219	0	2008220	0	24	2.35843810225873e-13	4.55007447192936e-10
2008220	0	2008221	0	24	0	0
2008221	0	2008222	0	24	0	0
2008222	0	2008223	0	24	0.000232280637509121	0.437373063969414
2008223	0	2008224	0	24	4.68692025115165e-05	0.00509595944195699
2008224	0	2008225	0	24	0.000362129554729323	0.680616089802484
2008225	0	2008226	0	24	6.54526786773597e-15	1.04074989718575e-09
2008226	0	2008227	0	24	0	0.0840158007089345
2008227	0	2008228	0	24	0	0
2008228	0	2008229	0	24	0.00027285352976844	0.236197325513294
2008229	0	2008230	0	24	0.00182817758003128	5.57422048843702
2008230	0	2008231	0	24	0	0
2008231	0	2008232	0	24	0	0
2008232	0	2008233	0	24	2.89062009484892e-11	1.75505428592904e-08
2008233	0	2008234	0	24	0	1.88983557691813e-07
2008234	0	2008235	0	24	0.000960147690966551	0.944647976434176
2008235	0	2008236	0	24	0.0025196916039156	2.38297418005469
2008236	0	2008237	0	24	0.000442969942214404	1.3167167478241
2008237	0	2008238	0	24	1.30532168566138e-05	0.0949518137250205
2008238	0	2008239	0	24	0.000373045995978709	5.07795843642368
2008239	0	2008240	0	24	4.59809892568594e-08	0.0881786873192452
2008240	0	2008241	0	24	0.00216444160378232	1.29074931841799
2008241	0	2008242	0	24	0.0111438315388735	2.78900430716957
2008242	0	2008243	0	24	0.000102173141701302	1.24692144867712
2008243	0	2008244	0	24	3.45695540324568e-15	1.89706094556137e-08
