# Supplementary material for: A comparison of sea salt emission parameterizations in northwestern Europe using a chemistry transport model setup
Source: Copernicus journal article supplement (doi:10.5194/acp-16-9905-2016), 2016-08-08
Supplement: Supplementary file 2 [file acp-16-9905-2016-supplement.zip › wetdep/wetdep.timeseries.values.LV0016R.ov14.moreStations.csv]

doy_start	hour_start	doy_end	hour_end	n_vals	Na in kg/ha/d	precip in mm/d
2008001	0	2008002	0	24	0	0
2008002	0	2008003	0	24	0	0
2008003	0	2008004	0	24	0	0
2008004	0	2008005	0	24	0	0
2008005	0	2008006	0	24	0	0
2008006	0	2008007	0	24	0	0
2008007	0	2008008	0	24	0	0
2008008	0	2008009	0	24	0	0
2008009	0	2008010	0	24	9.26237874535538e-14	0.118263112081543
2008010	0	2008011	0	24	2.60345630913084e-12	1.36097236943496e-05
2008011	0	2008012	0	24	0.000116789691287652	0.715834479087818
2008012	0	2008013	0	24	9.72625856465664e-05	0.833198547095945
2008013	0	2008014	0	24	0.000559237269065895	0.0969023901878993
2008014	0	2008015	0	24	1.463949356753e-08	4.23348864528051e-06
2008015	0	2008016	0	24	1.62284593693648e-13	7.63572977633201e-11
2008016	0	2008017	0	24	1.77609198829535e-16	1.18131215043057e-12
2008017	0	2008018	0	24	4.83983886242378e-13	5.14366998849783e-05
2008018	0	2008019	0	24	5.07058828358629e-06	0.0917842692996501
2008019	0	2008020	0	24	0.00544013854061603	1.62946249495568
2008020	0	2008021	0	24	4.47320859084956e-17	1.49539743129827e-07
2008021	0	2008022	0	24	7.66525538996466e-12	0.00165909640586322
2008022	0	2008023	0	24	0	0
2008023	0	2008024	0	24	0	0
2008024	0	2008025	0	24	0.00312036644228556	0.811690375084602
2008025	0	2008026	0	24	0.0123949932085416	1.80214284672754
2008026	0	2008027	0	24	0	0.182915963912553
2008027	0	2008028	0	24	0	0
2008028	0	2008029	0	24	0	0
2008029	0	2008030	0	24	0.000153745138080582	0.019230450555335
2008030	0	2008031	0	24	0.00320303135868926	2.06353394743928
2008031	0	2008032	0	24	1.47325537241846e-08	0.00815817733557204
2008032	0	2008033	0	24	0	0
2008033	0	2008034	0	24	3.59713782180613e-12	6.17414267281569e-09
2008034	0	2008035	0	24	0	0
2008035	0	2008036	0	24	0	0
2008036	0	2008037	0	24	2.4040573215558e-05	0.0538781728222932
2008037	0	2008038	0	24	4.61771523526096e-06	0.000345623768734018
2008038	0	2008039	0	24	0.000307254488936111	0.114320117210234
2008039	0	2008040	0	24	1.35939719718111e-13	3.11891435357751e-05
2008040	0	2008041	0	24	0.00426575888625138	1.47063182208432
2008041	0	2008042	0	24	0.00136857264802192	1.94671079574618
2008042	0	2008043	0	24	0.000814373671869077	1.58148720627651
2008043	0	2008044	0	24	3.35581017606529e-06	0.0418247683620866
2008044	0	2008045	0	24	8.82179016159806e-06	0.00315509664616672
2008045	0	2008046	0	24	0	0
2008046	0	2008047	0	24	0	0
2008047	0	2008048	0	24	0	0
2008048	0	2008049	0	24	2.35678514930943e-06	5.16950332011754e-07
2008049	0	2008050	0	24	8.8201475373286e-05	0.0206947277907926
2008050	0	2008051	0	24	0	0.00127441031509079
2008051	0	2008052	0	24	1.2162536980298e-17	0
2008052	0	2008053	0	24	5.65285359333555e-12	3.47757792741725e-09
2008053	0	2008054	0	24	0.0156170089480024	2.48063979745511
2008054	0	2008055	0	24	1.73551192165194e-05	0.252994177465863
2008055	0	2008056	0	24	0.000638821529763457	0.671531503208646
2008056	0	2008057	0	24	0.00532892112993764	3.12931596684408
2008057	0	2008058	0	24	0.0021104466760471	2.05045412399159
2008058	0	2008059	0	24	0.0146987147383879	5.08261018898338
2008059	0	2008060	0	24	1.99146057535387e-08	1.14641111127119
2008060	0	2008061	0	24	6.68133349217933e-05	0.00859568232113701
2008183	0	2008184	0	24	4.03291173150902e-14	6.59112025568287e-11
2008184	0	2008185	0	24	0	0
2008185	0	2008186	0	24	0.000278445433687011	1.14550070518817
2008186	0	2008187	0	24	0.000121237421505283	2.97394046718199
2008187	0	2008188	0	24	8.7667420038249e-06	0.491952003514122
2008188	0	2008189	0	24	3.39239753379354e-17	2.21928532530729e-06
2008189	0	2008190	0	24	0.000531985832452621	3.33657792337897
2008190	0	2008191	0	24	3.41439085258298e-07	0.518971311420993
2008191	0	2008192	0	24	0.000895918620626975	3.1619352006555
2008192	0	2008193	0	24	0	0
2008193	0	2008194	0	24	0	0
2008194	0	2008195	0	24	0.000735044991128808	2.3609341228563
2008195	0	2008196	0	24	3.74523637856328e-05	0.236651925740039
2008196	0	2008197	0	24	0.000619645154429825	5.11969350836181
2008197	0	2008198	0	24	0	0
2008198	0	2008199	0	24	0	0
2008199	0	2008200	0	24	0.00109939259200058	4.24898571270632
2008200	0	2008201	0	24	0	0
2008201	0	2008202	0	24	2.07835156254706e-11	9.58486993940522e-08
2008202	0	2008203	0	24	5.08539294242751e-05	0.576261403522563
2008203	0	2008204	0	24	5.42291269084748e-05	0.123423326883691
2008204	0	2008205	0	24	0	0.448523408078358
2008205	0	2008206	0	24	0	0
2008206	0	2008207	0	24	0	0
2008207	0	2008208	0	24	0	0
2008208	0	2008209	0	24	0	0
2008209	0	2008210	0	24	0	0
2008210	0	2008211	0	24	7.40255909548919e-14	0
2008211	0	2008212	0	24	6.61945068206662e-14	0.0100285949846522
2008212	0	2008213	0	24	6.10387398485687e-06	0.711094971650743
2008213	0	2008214	0	24	2.60369575447019e-16	9.27102470314745e-11
2008214	0	2008215	0	24	2.7401762994067e-11	5.52990773172723e-06
2008215	0	2008216	0	24	0	0
2008216	0	2008217	0	24	5.91629794696112e-05	0.743571393464054
2008217	0	2008218	0	24	0.00761113142649468	12.4499357968928
2008218	0	2008219	0	24	0.00186321309024665	3.50002202037629
2008219	0	2008220	0	24	1.9244042422378e-13	4.55007447192936e-10
2008220	0	2008221	0	24	0	0
2008221	0	2008222	0	24	0	0
2008222	0	2008223	0	24	0.000129362555292514	0.437373063969414
2008223	0	2008224	0	24	2.04954548458909e-05	0.00509595944195699
2008224	0	2008225	0	24	0.000246030132112964	0.680616089802484
2008225	0	2008226	0	24	6.56351452019561e-15	1.04074989718575e-09
2008226	0	2008227	0	24	0	0.0840158007089345
2008227	0	2008228	0	24	0	0
2008228	0	2008229	0	24	0.000241438556507807	0.236197325513294
2008229	0	2008230	0	24	0.00186864500494651	5.57422048843702
2008230	0	2008231	0	24	0	0
2008231	0	2008232	0	24	0	0
2008232	0	2008233	0	24	3.77878963048802e-11	1.75505428592904e-08
2008233	0	2008234	0	24	0	1.88983557691813e-07
2008234	0	2008235	0	24	0.000877397340991593	0.944647976434176
2008235	0	2008236	0	24	0.00335644378859804	2.38297418005469
2008236	0	2008237	0	24	0.00250609980134101	1.3167167478241
2008237	0	2008238	0	24	4.36617489510441e-05	0.0949518137250205
2008238	0	2008239	0	24	0.00103822133434388	5.07795843642368
2008239	0	2008240	0	24	7.63994073891698e-08	0.0881786873192452
2008240	0	2008241	0	24	0.00133367245851338	1.29074931841799
2008241	0	2008242	0	24	0.00945380312491735	2.78900430716957
2008242	0	2008243	0	24	8.06194838168139e-05	1.24692144867712
2008243	0	2008244	0	24	1.07161397533305e-15	1.89706094556137e-08
