# Supplementary material for: A comparison of sea salt emission parameterizations in northwestern Europe using a chemistry transport model setup
Source: Copernicus journal article supplement (doi:10.5194/acp-16-9905-2016), 2016-08-08
Supplement: Supplementary file 2 [file acp-16-9905-2016-supplement.zip › wetdep/wetdep.timeseries.values.LV0016R.sp13.moreStations.csv]

doy_start	hour_start	doy_end	hour_end	n_vals	Na in kg/ha/d	precip in mm/d
2008001	0	2008002	0	24	0	0
2008002	0	2008003	0	24	0	0
2008003	0	2008004	0	24	0	0
2008004	0	2008005	0	24	0	0
2008005	0	2008006	0	24	0	0
2008006	0	2008007	0	24	0	0
2008007	0	2008008	0	24	0	0
2008008	0	2008009	0	24	0	0
2008009	0	2008010	0	24	1.74983588674459e-13	0.118263112081543
2008010	0	2008011	0	24	1.0138399567094e-11	1.36097236943496e-05
2008011	0	2008012	0	24	0.000212360590939079	0.715834479087818
2008012	0	2008013	0	24	0.000337541206374211	0.833198547095945
2008013	0	2008014	0	24	0.00231132770110155	0.0969023901878993
2008014	0	2008015	0	24	3.46988200391202e-08	4.23348864528051e-06
2008015	0	2008016	0	24	6.77427907216558e-13	7.63572977633201e-11
2008016	0	2008017	0	24	3.75064436548339e-16	1.18131215043057e-12
2008017	0	2008018	0	24	9.86511355596667e-13	5.14366998849783e-05
2008018	0	2008019	0	24	1.55692733664351e-05	0.0917842692996501
2008019	0	2008020	0	24	0.0452371660126067	1.62946249495568
2008020	0	2008021	0	24	2.1411058488478e-16	1.49539743129827e-07
2008021	0	2008022	0	24	2.11862707296836e-11	0.00165909640586322
2008022	0	2008023	0	24	0	0
2008023	0	2008024	0	24	0	0
2008024	0	2008025	0	24	0.0144248030995095	0.811690375084602
2008025	0	2008026	0	24	0.0909808387626546	1.80214284672754
2008026	0	2008027	0	24	0	0.182915963912553
2008027	0	2008028	0	24	0	0
2008028	0	2008029	0	24	0	0
2008029	0	2008030	0	24	0.000474217954051677	0.019230450555335
2008030	0	2008031	0	24	0.00375150454586219	2.06353394743928
2008031	0	2008032	0	24	1.43821882984713e-08	0.00815817733557204
2008032	0	2008033	0	24	0	0
2008033	0	2008034	0	24	2.34882919784144e-11	6.17414267281569e-09
2008034	0	2008035	0	24	0	0
2008035	0	2008036	0	24	0	0
2008036	0	2008037	0	24	0.000239322956103933	0.0538781728222932
2008037	0	2008038	0	24	2.06632472062406e-05	0.000345623768734018
2008038	0	2008039	0	24	0.00187247648252917	0.114320117210234
2008039	0	2008040	0	24	3.80505981870017e-13	3.11891435357751e-05
2008040	0	2008041	0	24	0.00801414125574183	1.47063182208432
2008041	0	2008042	0	24	0.00388057591576228	1.94671079574618
2008042	0	2008043	0	24	0.00268235716522895	1.58148720627651
2008043	0	2008044	0	24	1.56426216004749e-05	0.0418247683620866
2008044	0	2008045	0	24	2.48735838278606e-05	0.00315509664616672
2008045	0	2008046	0	24	0	0
2008046	0	2008047	0	24	0	0
2008047	0	2008048	0	24	0	0
2008048	0	2008049	0	24	1.93861201275681e-05	5.16950332011754e-07
2008049	0	2008050	0	24	0.000696680304823587	0.0206947277907926
2008050	0	2008051	0	24	0	0.00127441031509079
2008051	0	2008052	0	24	2.06010917592438e-17	0
2008052	0	2008053	0	24	1.28684700194199e-11	3.47757792741725e-09
2008053	0	2008054	0	24	0.113432548602099	2.48063979745511
2008054	0	2008055	0	24	6.54472553235206e-05	0.252994177465863
2008055	0	2008056	0	24	0.00253201648139408	0.671531503208646
2008056	0	2008057	0	24	0.0100781774733177	3.12931596684408
2008057	0	2008058	0	24	0.0103104357711891	2.05045412399159
2008058	0	2008059	0	24	0.0970286690107605	5.08261018898338
2008059	0	2008060	0	24	6.78328367185183e-08	1.14641111127119
2008060	0	2008061	0	24	0.000363774699995708	0.00859568232113701
2008183	0	2008184	0	24	4.07289151821869e-14	6.59112025568287e-11
2008184	0	2008185	0	24	0	0
2008185	0	2008186	0	24	0.000636928558560612	1.14550070518817
2008186	0	2008187	0	24	0.000286396341285143	2.97394046718199
2008187	0	2008188	0	24	6.00337858316364e-05	0.491952003514122
2008188	0	2008189	0	24	4.74348717428171e-17	2.21928532530729e-06
2008189	0	2008190	0	24	0.00168818105741077	3.33657792337897
2008190	0	2008191	0	24	1.08147301976541e-06	0.518971311420993
2008191	0	2008192	0	24	0.00407545967047264	3.1619352006555
2008192	0	2008193	0	24	0	0
2008193	0	2008194	0	24	0	0
2008194	0	2008195	0	24	0.000494609236965968	2.3609341228563
2008195	0	2008196	0	24	3.96018249011831e-05	0.236651925740039
2008196	0	2008197	0	24	0.000937081871867219	5.11969350836181
2008197	0	2008198	0	24	0	0
2008198	0	2008199	0	24	0	0
2008199	0	2008200	0	24	0.00269283566600557	4.24898571270632
2008200	0	2008201	0	24	0	0
2008201	0	2008202	0	24	3.65740214830945e-11	9.58486993940522e-08
2008202	0	2008203	0	24	8.83333441008806e-05	0.576261403522563
2008203	0	2008204	0	24	0.000186993461684351	0.123423326883691
2008204	0	2008205	0	24	0	0.448523408078358
2008205	0	2008206	0	24	0	0
2008206	0	2008207	0	24	0	0
2008207	0	2008208	0	24	0	0
2008208	0	2008209	0	24	0	0
2008209	0	2008210	0	24	0	0
2008210	0	2008211	0	24	1.00689318434908e-13	0
2008211	0	2008212	0	24	2.42476916237593e-13	0.0100285949846522
2008212	0	2008213	0	24	0.000111911118839462	0.711094971650743
2008213	0	2008214	0	24	5.12170656126259e-15	9.27102470314745e-11
2008214	0	2008215	0	24	6.47438581288795e-10	5.52990773172723e-06
2008215	0	2008216	0	24	0	0
2008216	0	2008217	0	24	0.000171135550009954	0.743571393464054
2008217	0	2008218	0	24	0.00662585414434291	12.4499357968928
2008218	0	2008219	0	24	0.00282888827416265	3.50002202037629
2008219	0	2008220	0	24	2.99914517227598e-13	4.55007447192936e-10
2008220	0	2008221	0	24	0	0
2008221	0	2008222	0	24	0	0
2008222	0	2008223	0	24	0.000560777811090077	0.437373063969414
2008223	0	2008224	0	24	8.95133698234485e-05	0.00509595944195699
2008224	0	2008225	0	24	0.000726969429908002	0.680616089802484
2008225	0	2008226	0	24	1.69117350230449e-14	1.04074989718575e-09
2008226	0	2008227	0	24	0	0.0840158007089345
2008227	0	2008228	0	24	0	0
2008228	0	2008229	0	24	0.000613785036271174	0.236197325513294
2008229	0	2008230	0	24	0.00450348671701154	5.57422048843702
2008230	0	2008231	0	24	0	0
2008231	0	2008232	0	24	0	0
2008232	0	2008233	0	24	4.85881521475329e-11	1.75505428592904e-08
2008233	0	2008234	0	24	0	1.88983557691813e-07
2008234	0	2008235	0	24	0.001805744208541	0.944647976434176
2008235	0	2008236	0	24	0.0043237892546063	2.38297418005469
2008236	0	2008237	0	24	0.0010074129163786	1.3167167478241
2008237	0	2008238	0	24	2.87040579903458e-05	0.0949518137250205
2008238	0	2008239	0	24	0.000795919768015678	5.07795843642368
2008239	0	2008240	0	24	1.02598361168362e-07	0.0881786873192452
2008240	0	2008241	0	24	0.00386122423572861	1.29074931841799
2008241	0	2008242	0	24	0.0242612571343264	2.78900430716957
2008242	0	2008243	0	24	0.000226845343600111	1.24692144867712
2008243	0	2008244	0	24	2.91273487612539e-15	1.89706094556137e-08
