# Supplementary material for: A comparison of sea salt emission parameterizations in northwestern Europe using a chemistry transport model setup
Source: Copernicus journal article supplement (doi:10.5194/acp-16-9905-2016), 2016-08-08
Supplement: Supplementary file 2 [file acp-16-9905-2016-supplement.zip › wetdep/wetdep.timeseries.values.LV0016R.zero.moreStations.csv]

doy_start	hour_start	doy_end	hour_end	n_vals	Na in kg/ha/d	precip in mm/d
2008001	0	2008002	0	24	0	0
2008002	0	2008003	0	24	0	0
2008003	0	2008004	0	24	0	0
2008004	0	2008005	0	24	0	0
2008005	0	2008006	0	24	0	0
2008006	0	2008007	0	24	0	0
2008007	0	2008008	0	24	0	0
2008008	0	2008009	0	24	0	0
2008009	0	2008010	0	24	1.33657261010659e-29	0.118263112081543
2008010	0	2008011	0	24	2.17562715262119e-28	1.36097236943496e-05
2008011	0	2008012	0	24	1.1454076749254e-19	0.715834479087818
2008012	0	2008013	0	24	4.29679916793834e-20	0.833198547095945
2008013	0	2008014	0	24	5.20594583743879e-20	0.0969023901878993
2008014	0	2008015	0	24	1.61557636484794e-24	4.23348864528051e-06
2008015	0	2008016	0	24	5.94375017683453e-29	7.63572977633201e-11
2008016	0	2008017	0	24	1.64032714001255e-31	1.18131215043057e-12
2008017	0	2008018	0	24	4.57465285284582e-28	5.14366998849783e-05
2008018	0	2008019	0	24	6.71652134716265e-21	0.0917842692996501
2008019	0	2008020	0	24	5.16558652553619e-19	1.62946249495568
2008020	0	2008021	0	24	2.31537580356921e-33	1.49539743129827e-07
2008021	0	2008022	0	24	8.41304017991255e-28	0.00165909640586322
2008022	0	2008023	0	24	0	0
2008023	0	2008024	0	24	0	0
2008024	0	2008025	0	24	2.52421585825866e-19	0.811690375084602
2008025	0	2008026	0	24	1.21282690246217e-18	1.80214284672754
2008026	0	2008027	0	24	0	0.182915963912553
2008027	0	2008028	0	24	0	0
2008028	0	2008029	0	24	0	0
2008029	0	2008030	0	24	6.24499950506205e-21	0.019230450555335
2008030	0	2008031	0	24	8.68629180416239e-20	2.06353394743928
2008031	0	2008032	0	24	5.37514660528675e-25	0.00815817733557204
2008032	0	2008033	0	24	0	0
2008033	0	2008034	0	24	1.22104464077405e-27	6.17414267281569e-09
2008034	0	2008035	0	24	0	0
2008035	0	2008036	0	24	0	0
2008036	0	2008037	0	24	3.76908456987421e-20	0.0538781728222932
2008037	0	2008038	0	24	6.28241491382843e-22	0.000345623768734018
2008038	0	2008039	0	24	6.18711609717746e-20	0.114320117210234
2008039	0	2008040	0	24	1.46419294721775e-28	3.11891435357751e-05
2008040	0	2008041	0	24	4.48170614460068e-19	1.47063182208432
2008041	0	2008042	0	24	1.52692526818503e-19	1.94671079574618
2008042	0	2008043	0	24	1.19457912324245e-19	1.58148720627651
2008043	0	2008044	0	24	4.74407929122177e-22	0.0418247683620866
2008044	0	2008045	0	24	1.3014647230208e-21	0.00315509664616672
2008045	0	2008046	0	24	0	0
2008046	0	2008047	0	24	0	0
2008047	0	2008048	0	24	0	0
2008048	0	2008049	0	24	5.3777119339278e-23	5.16950332011754e-07
2008049	0	2008050	0	24	3.58850786040482e-21	0.0206947277907926
2008050	0	2008051	0	24	0	0.00127441031509079
2008051	0	2008052	0	24	1.48023033227495e-34	0
2008052	0	2008053	0	24	2.57844776870544e-28	3.47757792741725e-09
2008053	0	2008054	0	24	7.99682028890404e-19	2.48063979745511
2008054	0	2008055	0	24	1.502326395046e-21	0.252994177465863
2008055	0	2008056	0	24	1.89469202672589e-20	0.671531503208646
2008056	0	2008057	0	24	1.35597349986467e-19	3.12931596684408
2008057	0	2008058	0	24	3.90147310800939e-19	2.05045412399159
2008058	0	2008059	0	24	1.06267113427213e-18	5.08261018898338
2008059	0	2008060	0	24	7.51759418169824e-25	1.14641111127119
2008060	0	2008061	0	24	4.26754201229014e-21	0.00859568232113701
2008183	0	2008184	0	24	1.32940000303073e-29	6.59112025568287e-11
2008184	0	2008185	0	24	0	0
2008185	0	2008186	0	24	1.75972310204744e-18	1.14550070518817
2008186	0	2008187	0	24	4.43582611467164e-18	2.97394046718199
2008187	0	2008188	0	24	8.70286000717184e-19	0.491952003514122
2008188	0	2008189	0	24	3.47755749058528e-32	2.21928532530729e-06
2008189	0	2008190	0	24	2.15626953145086e-18	3.33657792337897
2008190	0	2008191	0	24	3.56185089583892e-22	0.518971311420993
2008191	0	2008192	0	24	4.52409406707615e-18	3.1619352006555
2008192	0	2008193	0	24	0	0
2008193	0	2008194	0	24	0	0
2008194	0	2008195	0	24	3.12756340560957e-18	2.3609341228563
2008195	0	2008196	0	24	2.44169477428397e-19	0.236651925740039
2008196	0	2008197	0	24	6.2164772129004e-18	5.11969350836181
2008197	0	2008198	0	24	0	0
2008198	0	2008199	0	24	0	0
2008199	0	2008200	0	24	4.63483632017799e-18	4.24898571270632
2008200	0	2008201	0	24	0	0
2008201	0	2008202	0	24	8.12083635562748e-26	9.58486993940522e-08
2008202	0	2008203	0	24	3.00682916776805e-19	0.576261403522563
2008203	0	2008204	0	24	2.01233304695286e-19	0.123423326883691
2008204	0	2008205	0	24	0	0.448523408078358
2008205	0	2008206	0	24	0	0
2008206	0	2008207	0	24	0	0
2008207	0	2008208	0	24	0	0
2008208	0	2008209	0	24	0	0
2008209	0	2008210	0	24	0	0
2008210	0	2008211	0	24	1.463327366989e-28	0
2008211	0	2008212	0	24	2.23841840653757e-28	0.0100285949846522
2008212	0	2008213	0	24	8.80686850481912e-19	0.711094971650743
2008213	0	2008214	0	24	2.19144247731549e-29	9.27102470314745e-11
2008214	0	2008215	0	24	1.02247978919952e-23	5.52990773172723e-06
2008215	0	2008216	0	24	0	0
2008216	0	2008217	0	24	2.66279293907807e-19	0.743571393464054
2008217	0	2008218	0	24	8.32220490807645e-18	12.4499357968928
2008218	0	2008219	0	24	4.3206785909668e-18	3.50002202037629
2008219	0	2008220	0	24	4.16015863022755e-28	4.55007447192936e-10
2008220	0	2008221	0	24	0	0
2008221	0	2008222	0	24	0	0
2008222	0	2008223	0	24	5.5983199344562e-19	0.437373063969414
2008223	0	2008224	0	24	1.13808656932154e-20	0.00509595944195699
2008224	0	2008225	0	24	3.42445822283805e-19	0.680616089802484
2008225	0	2008226	0	24	4.21747550742011e-29	1.04074989718575e-09
2008226	0	2008227	0	24	0	0.0840158007089345
2008227	0	2008228	0	24	0	0
2008228	0	2008229	0	24	4.41653882533322e-19	0.236197325513294
2008229	0	2008230	0	24	6.5883437559267e-18	5.57422048843702
2008230	0	2008231	0	24	0	0
2008231	0	2008232	0	24	0	0
2008232	0	2008233	0	24	5.44864966445374e-26	1.75505428592904e-08
2008233	0	2008234	0	24	0	1.88983557691813e-07
2008234	0	2008235	0	24	1.29732612197203e-18	0.944647976434176
2008235	0	2008236	0	24	3.30649813955235e-18	2.38297418005469
2008236	0	2008237	0	24	1.04183289697295e-18	1.3167167478241
2008237	0	2008238	0	24	4.98420089548568e-20	0.0949518137250205
2008238	0	2008239	0	24	1.48637885121614e-18	5.07795843642368
2008239	0	2008240	0	24	5.27726638814751e-23	0.0881786873192452
2008240	0	2008241	0	24	1.349762164444e-18	1.29074931841799
2008241	0	2008242	0	24	3.20676182526772e-18	2.78900430716957
2008242	0	2008243	0	24	1.66271730718318e-18	1.24692144867712
2008243	0	2008244	0	24	1.85087808110355e-29	1.89706094556137e-08
