# Supplementary material for: A comparison of sea salt emission parameterizations in northwestern Europe using a chemistry transport model setup
Source: Copernicus journal article supplement (doi:10.5194/acp-16-9905-2016), 2016-08-08
Supplement: Supplementary file 2 [file acp-16-9905-2016-supplement.zip › wetdep/wetdep.timeseries.values.NO0001R.ov14.moreStations.csv]

doy_start	hour_start	doy_end	hour_end	n_vals	Na in kg/ha/d	precip in mm/d
2008001	7	2008002	7	24	0.00432205272271197	0.656803472581637
2008002	7	2008003	7	24	0.00594372749493736	1.20828514877739
2008003	7	2008004	7	24	0	0
2008004	7	2008005	7	24	0	0
2008005	7	2008006	7	24	0.00560088863455349	3.84190045924275
2008006	7	2008007	7	24	0.00810690073338955	2.33057442596702
2008007	7	2008008	7	24	0.00864598347270771	9.1764892777428
2008008	7	2008009	7	24	0.0418927500844502	13.1374512706835
2008009	7	2008010	7	24	0.0157600417571611	6.91985726753119
2008010	7	2008011	7	24	0.0595972976469996	21.0691039545355
2008011	7	2008012	7	24	0	2.97130471078204e-05
2008012	7	2008013	7	24	0	5.11801876977857e-05
2008013	7	2008014	7	24	0.0634424516850809	11.2788692654576
2008014	7	2008015	7	24	0.140567583034954	14.1172699135177
2008015	7	2008016	7	24	0.075115485821625	26.3801557455372
2008016	7	2008017	7	24	0.100307909969919	14.8752355424732
2008017	7	2008018	7	24	0.00143448978162082	4.47663283098095
2008018	7	2008019	7	24	0.0389212458756538	12.6174544123933
2008019	7	2008020	7	24	0	0.16337753260696
2008020	7	2008021	7	24	0	2.18549247561297
2008021	7	2008022	7	24	0	0.00787102837942602
2008022	7	2008023	7	24	0	0.0887243035373432
2008023	7	2008024	7	24	0.0123605481273891	6.06462991196259
2008024	7	2008025	7	24	0.0192805847659838	6.54408768000793
2008025	7	2008026	7	24	0.0328662303940655	13.2392110559886
2008026	7	2008027	7	24	0	0.401579178764051
2008027	7	2008028	7	24	0.000112631231786921	0.00278292555640005
2008028	7	2008029	7	24	0.000490736721081634	0.101071734150227
2008029	7	2008030	7	24	0.00276586311891151	0.821913319705554
2008030	7	2008031	7	24	0	0.00510039293108896
2008031	7	2008032	7	24	0.0957021833558269	8.38133656472432
2008032	7	2008033	7	24	1.81669335032453e-05	2.16707530533008
2008033	7	2008034	7	24	0	6.3487136006124e-05
2008034	7	2008035	7	24	0	1.24022256965217
2008035	7	2008036	7	24	0.00121028747941125	2.7463308894102
2008036	7	2008037	7	24	0.0618088236246786	20.0291208653381
2008037	7	2008038	7	24	0.00546795465121704	3.60733681861416
2008038	7	2008039	7	24	0.00319728376122761	1.0466293806549
2008039	7	2008040	7	24	0.000367181129407239	0.415498295953358
2008040	7	2008041	7	24	0	0.0515198896856877
2008041	7	2008042	7	24	0	4.70658736240379e-07
2008042	7	2008043	7	24	0.000238435567104744	0.0217212844830547
2008043	7	2008044	7	24	0	0.000288545240029748
2008044	7	2008045	7	24	1.29110477681426e-05	0.00304567184080753
2008045	7	2008046	7	24	0	0
2008046	7	2008047	7	24	0	9.041997892644e-09
2008047	7	2008048	7	24	5.70227563168046e-07	0.0518957487916194
2008048	7	2008049	7	24	0	0.135977854549617
2008049	7	2008050	7	24	0	2.4909216445696e-09
2008050	7	2008051	7	24	0	0.0628980883085664
2008051	7	2008052	7	24	4.95352516509229e-06	0.352827347286881
2008052	7	2008053	7	24	0.02798579329723	8.30584482406266
2008053	7	2008054	7	24	4.81619785409748e-05	3.13626652190578
2008054	7	2008055	7	24	0.00522182851862738	4.36974807457716
2008055	7	2008056	7	24	4.18935455716313e-05	0.030261622512078
2008056	7	2008057	7	24	0.00669876909555121	5.73188640216585
2008057	7	2008058	7	24	0.0272926237163478	7.26652545417892
2008058	7	2008059	7	24	0	0.696742772611614
2008059	7	2008060	7	24	0.000623606232056773	2.01515142698125
2008060	7	2008061	7	17	0.0192751043212282	14.4271042157197
2008182	7	2008183	7	7	0	0
2008183	7	2008184	7	24	0	0
2008184	7	2008185	7	24	0	0
2008185	7	2008186	7	24	0	0
2008186	7	2008187	7	24	9.37801678761036e-13	1.25217198229958e-14
2008187	7	2008188	7	24	4.46206407686435e-06	0.243634569118802
2008188	7	2008189	7	24	0.000484038235328902	6.28763451556883
2008189	7	2008190	7	24	0.00222338391871514	1.31946541821883
2008190	7	2008191	7	24	0.00343679706809969	4.59790662744394
2008191	7	2008192	7	24	5.11834601885002e-05	0.250042458607703
2008192	7	2008193	7	24	0.00574359337337398	1.93672333919279
2008193	7	2008194	7	24	0.0294263485687043	18.6329674558158
2008194	7	2008195	7	24	0.0118744949878509	12.9229707852152
2008195	7	2008196	7	24	0.00158524638953168	0.919651301821988
2008196	7	2008197	7	24	4.85966429518084e-07	0.00289317806944022
2008197	7	2008198	7	24	0.000737940644085021	0.484984713823627
2008198	7	2008199	7	24	1.48919205576978e-09	0.031556000210955
2008199	7	2008200	7	24	1.20775881844978e-13	1.81503853075407e-11
2008200	7	2008201	7	24	0	8.00233468899181e-12
2008201	7	2008202	7	24	0.00525570564791906	15.1321844542271
2008202	7	2008203	7	24	0.00463852003111242	15.6858985060305
2008203	7	2008204	7	24	0	0.770165659105326
2008204	7	2008205	7	24	0	1.48432089536188e-09
2008205	7	2008206	7	24	0	0
2008206	7	2008207	7	24	0	0
2008207	7	2008208	7	24	0	0
2008208	7	2008209	7	24	0	0
2008209	7	2008210	7	24	0	0
2008210	7	2008211	7	24	0	0
2008211	7	2008212	7	24	0	0
2008212	7	2008213	7	24	0	0
2008213	7	2008214	7	24	0	0
2008214	7	2008215	7	24	0.000290704914420417	2.5121195421685
2008215	7	2008216	7	24	0.000559835633757824	0.761992634946617
2008216	7	2008217	7	24	0.000312646587190102	1.3735347967112
2008217	7	2008218	7	24	0.000521825474368976	1.65746147188493
2008218	7	2008219	7	24	0.00111395118954793	0.801611191455478
2008219	7	2008220	7	24	0.0103460709136437	8.39588384261052
2008220	7	2008221	7	24	0.000311347416754947	0.604033106885653
2008221	7	2008222	7	24	0.000120376444202451	0.0451709980554998
2008222	7	2008223	7	24	0.00900174234809976	7.9879986993528
2008223	7	2008224	7	24	0.017962917461539	12.8135348377431
2008224	7	2008225	7	24	0.000819184307096166	0.555696064642641
2008225	7	2008226	7	24	0.0667803467777961	45.3377085097984
2008226	7	2008227	7	24	0.0223105354125349	11.5443756842767
2008227	7	2008228	7	24	7.24667737017626e-07	8.37386069751922e-05
2008228	7	2008229	7	24	0.00110243897988764	4.01130822391622
2008229	7	2008230	7	24	0	0
2008230	7	2008231	7	24	0	0
2008231	7	2008232	7	24	0	1.26887389484409e-11
2008232	7	2008233	7	24	0.0213636424095291	9.3729737065961
2008233	7	2008234	7	24	0.000811534227432276	1.36351868626662
2008234	7	2008235	7	24	0	2.16605411385018e-08
2008235	7	2008236	7	24	6.09162173579953e-11	1.02143753590866e-08
2008236	7	2008237	7	24	6.3199990715801e-09	1.34539294727176e-05
2008237	7	2008238	7	24	0.00365855780320089	3.14645111381063
2008238	7	2008239	7	24	0.0138633791155798	9.08084841205205
2008239	7	2008240	7	24	0.000874246788402633	0.385000900686906
2008240	7	2008241	7	24	0.00472007621162415	3.78037080999025
2008241	7	2008242	7	24	0	0
2008242	7	2008243	7	24	0	0
2008243	7	2008244	7	17	0	0
