# Supplementary material for: A comparison of sea salt emission parameterizations in northwestern Europe using a chemistry transport model setup
Source: Copernicus journal article supplement (doi:10.5194/acp-16-9905-2016), 2016-08-08
Supplement: Supplementary file 2 [file acp-16-9905-2016-supplement.zip › wetdep/wetdep.timeseries.values.NO0001R.sp13.moreStations.csv]

doy_start	hour_start	doy_end	hour_end	n_vals	Na in kg/ha/d	precip in mm/d
2008001	7	2008002	7	24	0.0136346193825611	0.656803472581637
2008002	7	2008003	7	24	0.0246986851552529	1.20828514877739
2008003	7	2008004	7	24	0	0
2008004	7	2008005	7	24	0	0
2008005	7	2008006	7	24	0.0407888083605849	3.84190045924275
2008006	7	2008007	7	24	0.0409202707357177	2.33057442596702
2008007	7	2008008	7	24	0.0322087803018348	9.1764892777428
2008008	7	2008009	7	24	0.323632215122123	13.1374512706835
2008009	7	2008010	7	24	0.118472884403534	6.91985726753119
2008010	7	2008011	7	24	0.44007556006368	21.0691039545355
2008011	7	2008012	7	24	0	2.97130471078204e-05
2008012	7	2008013	7	24	0	5.11801876977857e-05
2008013	7	2008014	7	24	0.45751374191495	11.2788692654576
2008014	7	2008015	7	24	1.15685628848621	14.1172699135177
2008015	7	2008016	7	24	0.508932581830159	26.3801557455372
2008016	7	2008017	7	24	0.861340810745822	14.8752355424732
2008017	7	2008018	7	24	0.00563255776187159	4.47663283098095
2008018	7	2008019	7	24	0.428890395523085	12.6174544123933
2008019	7	2008020	7	24	0	0.16337753260696
2008020	7	2008021	7	24	0	2.18549247561297
2008021	7	2008022	7	24	0	0.00787102837942602
2008022	7	2008023	7	24	0	0.0887243035373432
2008023	7	2008024	7	24	0.0360387292599115	6.06462991196259
2008024	7	2008025	7	24	0.325517640917242	6.54408768000793
2008025	7	2008026	7	24	0.368432985899854	13.2392110559886
2008026	7	2008027	7	24	0	0.401579178764051
2008027	7	2008028	7	24	0.00034860204592744	0.00278292555640005
2008028	7	2008029	7	24	0.0015794874310545	0.101071734150227
2008029	7	2008030	7	24	0.0116154048906901	0.821913319705554
2008030	7	2008031	7	24	0	0.00510039293108896
2008031	7	2008032	7	24	1.74038042530537	8.38133656472432
2008032	7	2008033	7	24	0.000138189626592293	2.16707530533008
2008033	7	2008034	7	24	0	6.3487136006124e-05
2008034	7	2008035	7	24	0	1.24022256965217
2008035	7	2008036	7	24	0.0102401924185097	2.7463308894102
2008036	7	2008037	7	24	0.416201886657145	20.0291208653381
2008037	7	2008038	7	24	0.0281313479182973	3.60733681861416
2008038	7	2008039	7	24	0.0169047769337004	1.0466293806549
2008039	7	2008040	7	24	0.0011173107253415	0.415498295953358
2008040	7	2008041	7	24	0	0.0515198896856877
2008041	7	2008042	7	24	0	4.70658736240379e-07
2008042	7	2008043	7	24	0.00108248384959751	0.0217212844830547
2008043	7	2008044	7	24	0	0.000288545240029748
2008044	7	2008045	7	24	7.42282623198767e-05	0.00304567184080753
2008045	7	2008046	7	24	0	0
2008046	7	2008047	7	24	0	9.041997892644e-09
2008047	7	2008048	7	24	2.10636661840624e-06	0.0518957487916194
2008048	7	2008049	7	24	0	0.135977854549617
2008049	7	2008050	7	24	0	2.4909216445696e-09
2008050	7	2008051	7	24	0	0.0628980883085664
2008051	7	2008052	7	24	2.20334586492754e-05	0.352827347286881
2008052	7	2008053	7	24	0.251368998335092	8.30584482406266
2008053	7	2008054	7	24	0.000451198312848646	3.13626652190578
2008054	7	2008055	7	24	0.02580262817267	4.36974807457716
2008055	7	2008056	7	24	0.000218806521925195	0.030261622512078
2008056	7	2008057	7	24	0.0563693094993494	5.73188640216585
2008057	7	2008058	7	24	0.240942109821167	7.26652545417892
2008058	7	2008059	7	24	0	0.696742772611614
2008059	7	2008060	7	24	0.00374988072398992	2.01515142698125
2008060	7	2008061	7	17	0.132876941369117	14.4271042157197
2008182	7	2008183	7	7	0	0
2008183	7	2008184	7	24	0	0
2008184	7	2008185	7	24	0	0
2008185	7	2008186	7	24	0	0
2008186	7	2008187	7	24	2.65688130871022e-11	1.25217198229958e-14
2008187	7	2008188	7	24	0.000199549075569506	0.243634569118802
2008188	7	2008189	7	24	0.00576423342776283	6.28763451556883
2008189	7	2008190	7	24	0.0102996722144783	1.31946541821883
2008190	7	2008191	7	24	0.0217765595881955	4.59790662744394
2008191	7	2008192	7	24	0.000222118731626177	0.250042458607703
2008192	7	2008193	7	24	0.0194016195385609	1.93672333919279
2008193	7	2008194	7	24	0.119665388460271	18.6329674558158
2008194	7	2008195	7	24	0.0794051627383169	12.9229707852152
2008195	7	2008196	7	24	0.00697313550626859	0.919651301821988
2008196	7	2008197	7	24	2.42910557080955e-06	0.00289317806944022
2008197	7	2008198	7	24	0.00404473052313212	0.484984713823627
2008198	7	2008199	7	24	7.17644833436793e-09	0.031556000210955
2008199	7	2008200	7	24	3.11617374362116e-13	1.81503853075407e-11
2008200	7	2008201	7	24	0	8.00233468899181e-12
2008201	7	2008202	7	24	0.0371987925435678	15.1321844542271
2008202	7	2008203	7	24	0.022695671718393	15.6858985060305
2008203	7	2008204	7	24	0	0.770165659105326
2008204	7	2008205	7	24	0	1.48432089536188e-09
2008205	7	2008206	7	24	0	0
2008206	7	2008207	7	24	0	0
2008207	7	2008208	7	24	0	0
2008208	7	2008209	7	24	0	0
2008209	7	2008210	7	24	0	0
2008210	7	2008211	7	24	0	0
2008211	7	2008212	7	24	0	0
2008212	7	2008213	7	24	0	0
2008213	7	2008214	7	24	0	0
2008214	7	2008215	7	24	0.00443661770393277	2.5121195421685
2008215	7	2008216	7	24	0.00473187073383949	0.761992634946617
2008216	7	2008217	7	24	0.00128045373188797	1.3735347967112
2008217	7	2008218	7	24	0.00199855276146697	1.65746147188493
2008218	7	2008219	7	24	0.00566666464586829	0.801611191455478
2008219	7	2008220	7	24	0.0425342471106348	8.39588384261052
2008220	7	2008221	7	24	0.000768926858436424	0.604033106885653
2008221	7	2008222	7	24	0.00102504004479808	0.0451709980554998
2008222	7	2008223	7	24	0.0436788659975592	7.9879986993528
2008223	7	2008224	7	24	0.0789365345099675	12.8135348377431
2008224	7	2008225	7	24	0.00758998803929598	0.555696064642641
2008225	7	2008226	7	24	0.402398401924551	45.3377085097984
2008226	7	2008227	7	24	0.108358218300376	11.5443756842767
2008227	7	2008228	7	24	4.60193752076066e-06	8.37386069751922e-05
2008228	7	2008229	7	24	0.00589818271236865	4.01130822391622
2008229	7	2008230	7	24	0	0
2008230	7	2008231	7	24	0	0
2008231	7	2008232	7	24	0	1.26887389484409e-11
2008232	7	2008233	7	24	0.09961441610679	9.3729737065961
2008233	7	2008234	7	24	0.00329258509431384	1.36351868626662
2008234	7	2008235	7	24	0	2.16605411385018e-08
2008235	7	2008236	7	24	2.95021523898795e-10	1.02143753590866e-08
2008236	7	2008237	7	24	2.46764575972946e-08	1.34539294727176e-05
2008237	7	2008238	7	24	0.0199029339017579	3.14645111381063
2008238	7	2008239	7	24	0.0553623896244122	9.08084841205205
2008239	7	2008240	7	24	0.00243693131829025	0.385000900686906
2008240	7	2008241	7	24	0.0171371845383856	3.78037080999025
2008241	7	2008242	7	24	0	0
2008242	7	2008243	7	24	0	0
2008243	7	2008244	7	17	0	0
