# Supplementary material for: A comparison of sea salt emission parameterizations in northwestern Europe using a chemistry transport model setup
Source: Copernicus journal article supplement (doi:10.5194/acp-16-9905-2016), 2016-08-08
Supplement: Supplementary file 2 [file acp-16-9905-2016-supplement.zip › wetdep/wetdep.timeseries.values.NO0001R.zero.moreStations.csv]

doy_start	hour_start	doy_end	hour_end	n_vals	Na in kg/ha/d	precip in mm/d
2008001	7	2008002	7	24	3.06188808314473e-18	0.656803472581637
2008002	7	2008003	7	24	8.72996292655379e-18	1.20828514877739
2008003	7	2008004	7	24	0	0
2008004	7	2008005	7	24	0	0
2008005	7	2008006	7	24	7.80282597115512e-19	3.84190045924275
2008006	7	2008007	7	24	9.70183213598696e-19	2.33057442596702
2008007	7	2008008	7	24	7.33227938653014e-19	9.1764892777428
2008008	7	2008009	7	24	1.05127870644828e-18	13.1374512706835
2008009	7	2008010	7	24	1.11755908237339e-18	6.91985726753119
2008010	7	2008011	7	24	3.25242091285288e-18	21.0691039545355
2008011	7	2008012	7	24	0	2.97130471078204e-05
2008012	7	2008013	7	24	0	5.11801876977857e-05
2008013	7	2008014	7	24	7.4924457053359e-19	11.2788692654576
2008014	7	2008015	7	24	1.06485336752869e-17	14.1172699135177
2008015	7	2008016	7	24	3.01384579273222e-18	26.3801557455372
2008016	7	2008017	7	24	3.25141138829086e-18	14.8752355424732
2008017	7	2008018	7	24	2.22495257485829e-19	4.47663283098095
2008018	7	2008019	7	24	2.88462614484657e-18	12.6174544123933
2008019	7	2008020	7	24	0	0.16337753260696
2008020	7	2008021	7	24	0	2.18549247561297
2008021	7	2008022	7	24	0	0.00787102837942602
2008022	7	2008023	7	24	0	0.0887243035373432
2008023	7	2008024	7	24	2.83228279368142e-19	6.06462991196259
2008024	7	2008025	7	24	1.50805205862611e-19	6.54408768000793
2008025	7	2008026	7	24	4.28656169297445e-19	13.2392110559886
2008026	7	2008027	7	24	0	0.401579178764051
2008027	7	2008028	7	24	2.88959648627427e-22	0.00278292555640005
2008028	7	2008029	7	24	1.26090788558319e-20	0.101071734150227
2008029	7	2008030	7	24	4.64213801164179e-20	0.821913319705554
2008030	7	2008031	7	24	0	0.00510039293108896
2008031	7	2008032	7	24	9.83107193172448e-18	8.38133656472432
2008032	7	2008033	7	24	3.3254781756511e-21	2.16707530533008
2008033	7	2008034	7	24	0	6.3487136006124e-05
2008034	7	2008035	7	24	0	1.24022256965217
2008035	7	2008036	7	24	1.03707962192871e-19	2.7463308894102
2008036	7	2008037	7	24	6.06920254493984e-18	20.0291208653381
2008037	7	2008038	7	24	4.72187965064879e-19	3.60733681861416
2008038	7	2008039	7	24	2.05066970394048e-19	1.0466293806549
2008039	7	2008040	7	24	1.42777571645174e-20	0.415498295953358
2008040	7	2008041	7	24	0	0.0515198896856877
2008041	7	2008042	7	24	0	4.70658736240379e-07
2008042	7	2008043	7	24	2.1394349218844e-20	0.0217212844830547
2008043	7	2008044	7	24	0	0.000288545240029748
2008044	7	2008045	7	24	1.0196469465489e-21	0.00304567184080753
2008045	7	2008046	7	24	0	0
2008046	7	2008047	7	24	0	9.041997892644e-09
2008047	7	2008048	7	24	4.34219874233502e-24	0.0518957487916194
2008048	7	2008049	7	24	0	0.135977854549617
2008049	7	2008050	7	24	0	2.4909216445696e-09
2008050	7	2008051	7	24	0	0.0628980883085664
2008051	7	2008052	7	24	2.98380713527766e-23	0.352827347286881
2008052	7	2008053	7	24	3.09621543564587e-19	8.30584482406266
2008053	7	2008054	7	24	2.79055595767723e-21	3.13626652190578
2008054	7	2008055	7	24	6.8783669132726e-20	4.36974807457716
2008055	7	2008056	7	24	2.46706328764849e-21	0.030261622512078
2008056	7	2008057	7	24	2.17997611937269e-19	5.73188640216585
2008057	7	2008058	7	24	4.54123773735258e-18	7.26652545417892
2008058	7	2008059	7	24	0	0.696742772611614
2008059	7	2008060	7	24	5.82678531034826e-20	2.01515142698125
2008060	7	2008061	7	17	4.20575625247349e-19	14.4271042157197
2008182	7	2008183	7	7	0	0
2008183	7	2008184	7	24	0	0
2008184	7	2008185	7	24	0	0
2008185	7	2008186	7	24	0	0
2008186	7	2008187	7	24	4.21789259371814e-26	1.25217198229958e-14
2008187	7	2008188	7	24	1.62700876889355e-19	0.243634569118802
2008188	7	2008189	7	24	8.20462705667586e-18	6.28763451556883
2008189	7	2008190	7	24	1.28747479722227e-18	1.31946541821883
2008190	7	2008191	7	24	5.24519239390167e-18	4.59790662744394
2008191	7	2008192	7	24	2.54624003373678e-19	0.250042458607703
2008192	7	2008193	7	24	4.27100746171763e-18	1.93672333919279
2008193	7	2008194	7	24	2.56428743680388e-17	18.6329674558158
2008194	7	2008195	7	24	1.51107051500078e-17	12.9229707852152
2008195	7	2008196	7	24	8.70141463702733e-19	0.919651301821988
2008196	7	2008197	7	24	7.24527347012365e-22	0.00289317806944022
2008197	7	2008198	7	24	4.20168733935903e-19	0.484984713823627
2008198	7	2008199	7	24	2.74876193461325e-25	0.031556000210955
2008199	7	2008200	7	24	2.49618678484552e-29	1.81503853075407e-11
2008200	7	2008201	7	24	0	8.00233468899181e-12
2008201	7	2008202	7	24	2.38196166998702e-17	15.1321844542271
2008202	7	2008203	7	24	1.91639579663769e-17	15.6858985060305
2008203	7	2008204	7	24	0	0.770165659105326
2008204	7	2008205	7	24	0	1.48432089536188e-09
2008205	7	2008206	7	24	0	0
2008206	7	2008207	7	24	0	0
2008207	7	2008208	7	24	0	0
2008208	7	2008209	7	24	0	0
2008209	7	2008210	7	24	0	0
2008210	7	2008211	7	24	0	0
2008211	7	2008212	7	24	0	0
2008212	7	2008213	7	24	0	0
2008213	7	2008214	7	24	0	0
2008214	7	2008215	7	24	3.84107836462533e-18	2.5121195421685
2008215	7	2008216	7	24	1.62154227126463e-18	0.761992634946617
2008216	7	2008217	7	24	6.42136889391576e-19	1.3735347967112
2008217	7	2008218	7	24	1.93466148390653e-18	1.65746147188493
2008218	7	2008219	7	24	1.74037708580077e-18	0.801611191455478
2008219	7	2008220	7	24	7.77378015849599e-18	8.39588384261052
2008220	7	2008221	7	24	2.63629582728767e-19	0.604033106885653
2008221	7	2008222	7	24	1.75507337427518e-19	0.0451709980554998
2008222	7	2008223	7	24	1.01468063257302e-18	7.9879986993528
2008223	7	2008224	7	24	1.13935459145447e-17	12.8135348377431
2008224	7	2008225	7	24	6.90128402550639e-19	0.555696064642641
2008225	7	2008226	7	24	3.33740294988423e-17	45.3377085097984
2008226	7	2008227	7	24	1.37290082803216e-17	11.5443756842767
2008227	7	2008228	7	24	3.43885927053965e-22	8.37386069751922e-05
2008228	7	2008229	7	24	5.17808681459464e-18	4.01130822391622
2008229	7	2008230	7	24	0	0
2008230	7	2008231	7	24	0	0
2008231	7	2008232	7	24	0	1.26887389484409e-11
2008232	7	2008233	7	24	1.27244432413716e-17	9.3729737065961
2008233	7	2008234	7	24	7.22492273370774e-19	1.36351868626662
2008234	7	2008235	7	24	0	2.16605411385018e-08
2008235	7	2008236	7	24	8.58894912611951e-26	1.02143753590866e-08
2008236	7	2008237	7	24	5.97681687328584e-24	1.34539294727176e-05
2008237	7	2008238	7	24	5.07384385016407e-18	3.14645111381063
2008238	7	2008239	7	24	1.15335099684995e-17	9.08084841205205
2008239	7	2008240	7	24	2.15733972074569e-19	0.385000900686906
2008240	7	2008241	7	24	1.14412423497991e-18	3.78037080999025
2008241	7	2008242	7	24	0	0
2008242	7	2008243	7	24	0	0
2008243	7	2008244	7	17	0	0
