# Supplementary material for: A comparison of sea salt emission parameterizations in northwestern Europe using a chemistry transport model setup
Source: Copernicus journal article supplement (doi:10.5194/acp-16-9905-2016), 2016-08-08
Supplement: Supplementary file 2 [file acp-16-9905-2016-supplement.zip › wetdep/wetdep.timeseries.values.NO0015R.ov14.moreStations.csv]

doy_start	hour_start	doy_end	hour_end	n_vals	Na in kg/ha/d	precip in mm/d
2008001	7	2008002	7	24	0	0
2008002	7	2008003	7	24	0	0
2008003	7	2008004	7	24	0	0
2008004	7	2008005	7	24	0	0
2008005	7	2008006	7	24	0	0
2008006	7	2008007	7	24	0	0
2008007	7	2008008	7	24	0	0
2008008	7	2008009	7	24	0	0
2008009	7	2008010	7	24	0	0
2008010	7	2008011	7	24	0	0
2008011	7	2008012	7	24	0	0
2008012	7	2008013	7	24	0	1.19013351267578e-10
2008013	7	2008014	7	24	4.47911253253401e-12	5.06027549845915e-09
2008014	7	2008015	7	24	0	8.39213111980194e-12
2008015	7	2008016	7	24	5.23474855731125e-09	3.88519083571737e-06
2008016	7	2008017	7	24	0	4.65927413296173e-15
2008017	7	2008018	7	24	0	0
2008018	7	2008019	7	24	0	0
2008019	7	2008020	7	24	0	9.94551765914193e-09
2008020	7	2008021	7	24	0	9.47422770390585e-12
2008021	7	2008022	7	24	0	0
2008022	7	2008023	7	24	0	0
2008023	7	2008024	7	24	1.12233021006868e-11	1.25725774875315e-09
2008024	7	2008025	7	24	5.35796385426329e-12	0.0474841480118583
2008025	7	2008026	7	24	0	2.53886505706231e-15
2008026	7	2008027	7	24	0	0
2008027	7	2008028	7	24	6.22637836765424e-13	4.47460231844596e-10
2008028	7	2008029	7	24	0.13910934282842	13.6889567982778
2008029	7	2008030	7	24	0	0
2008030	7	2008031	7	24	0	2.20444590180854e-12
2008031	7	2008032	7	24	0	0
2008032	7	2008033	7	24	0	0
2008033	7	2008034	7	24	1.51057500098154e-11	2.23159068481193e-08
2008034	7	2008035	7	24	4.24857176539338e-12	3.75324658505316e-09
2008035	7	2008036	7	24	0	0
2008036	7	2008037	7	24	0	0
2008037	7	2008038	7	24	2.08816345377768e-15	2.68088632890406e-11
2008038	7	2008039	7	24	1.1713055837341e-11	1.31335264156609e-09
2008039	7	2008040	7	24	3.6441154858877e-05	0.0543612913469572
2008040	7	2008041	7	24	0.0216839195324532	4.28822784032142
2008041	7	2008042	7	24	0.000577753333318856	0.490026574076242
2008042	7	2008043	7	24	2.39014018293814e-07	0.000241812997952486
2008043	7	2008044	7	24	0.00518185024306611	1.88148418131626
2008044	7	2008045	7	24	0	0
2008045	7	2008046	7	24	0	0
2008046	7	2008047	7	24	7.39465536004312e-12	0.00308659124279071
2008047	7	2008048	7	24	0.00758660839131991	0.358813640865419
2008048	7	2008049	7	24	0.00317717285196958	0.590734879002281
2008049	7	2008050	7	24	0	0
2008050	7	2008051	7	24	0	0.0376786839233267
2008051	7	2008052	7	24	0	0.0298595569710872
2008052	7	2008053	7	24	3.15324623245683e-09	0.00163552396186484
2008053	7	2008054	7	24	0.0114020089674991	0.99178305378417
2008054	7	2008055	7	24	0	1.87628923886105e-07
2008055	7	2008056	7	24	0.00601364005270502	1.24032869799943
2008056	7	2008057	7	24	0	1.36516431319122e-08
2008057	7	2008058	7	24	0	0
2008058	7	2008059	7	24	0	1.82587159909715e-09
2008059	7	2008060	7	24	0	0
2008060	7	2008061	7	17	0	0
2008182	7	2008183	7	7	0.00336369062079222	2.76738141465448
2008183	7	2008184	7	24	0.000928212147523729	3.18283818617401
2008184	7	2008185	7	24	0	0
2008185	7	2008186	7	24	0	0
2008186	7	2008187	7	24	4.11317509560427e-18	4.62155873737647e-12
2008187	7	2008188	7	24	1.37053566709195e-07	0.206119742779124
2008188	7	2008189	7	24	1.32461022087948e-07	0.223268149270741
2008189	7	2008190	7	24	0	0.000539596912858542
2008190	7	2008191	7	24	0	0
2008191	7	2008192	7	24	0.000231552127419014	0.151509275881432
2008192	7	2008193	7	24	3.70062823019081e-05	0.238671735393135
2008193	7	2008194	7	24	0	7.35795728816144e-11
2008194	7	2008195	7	24	0.00157641759372389	0.607289873030572
2008195	7	2008196	7	24	0.000806274780244256	2.4605124179816
2008196	7	2008197	7	24	0.00673294300351296	5.58114640770473
2008197	7	2008198	7	24	0.0136294443797377	8.63223798372928
2008198	7	2008199	7	24	0.011100649231143	6.2297326943572
2008199	7	2008200	7	24	0.00809331978061278	4.69022319566813
2008200	7	2008201	7	24	0.00374348290005407	5.74686137214405
2008201	7	2008202	7	24	0.000619832963700446	2.3044999222605
2008202	7	2008203	7	24	0.000119316189532972	1.0085780641035
2008203	7	2008204	7	24	0.000205152225335462	1.10864385979961
2008204	7	2008205	7	24	0.0154094367729449	3.70086883385646
2008205	7	2008206	7	24	0.0304736933872112	1.93430713334806
2008206	7	2008207	7	24	1.02201624917194e-05	0.000329673101173711
2008207	7	2008208	7	24	0	0
2008208	7	2008209	7	24	0	0
2008209	7	2008210	7	24	4.16478305545618e-05	0.319046617968426
2008210	7	2008211	7	24	0	1.07294351181508e-07
2008211	7	2008212	7	24	0	0
2008212	7	2008213	7	24	0.000142603457764466	0.260030537028923
2008213	7	2008214	7	24	5.10279230002197e-05	0.290319518907617
2008214	7	2008215	7	24	0	0
2008215	7	2008216	7	24	4.55258227486329e-06	0.00253900112579375
2008216	7	2008217	7	24	3.3865686138217e-06	0.0252224116213603
2008217	7	2008218	7	24	0	7.4612739848748e-09
2008218	7	2008219	7	24	0	1.34800996260284e-07
2008219	7	2008220	7	24	0.0011692953356717	3.20984434132558
2008220	7	2008221	7	24	0.00140010348647593	3.44990207534125
2008221	7	2008222	7	24	0.000275641541178602	0.365541722435286
2008222	7	2008223	7	24	0.000761742493817845	1.00030635413062
2008223	7	2008224	7	24	2.48848624607945e-06	0.447003864394012
2008224	7	2008225	7	24	0.0012973627042777	5.68201792048058
2008225	7	2008226	7	24	0.00158104863618014	3.04536464987259
2008226	7	2008227	7	24	0.00587669412371032	17.5578586236463
2008227	7	2008228	7	24	0.00404705618334411	6.48073526044645
2008228	7	2008229	7	24	0.00138573148651631	0.640585433844877
2008229	7	2008230	7	24	0	0
2008230	7	2008231	7	24	0	0.0137216856493297
2008231	7	2008232	7	24	0.00263984669326919	7.80954001578044
2008232	7	2008233	7	24	0.000121514054640262	4.89045341644669
2008233	7	2008234	7	24	0.00032138809497954	1.96701829127577
2008234	7	2008235	7	24	0.00526300149684801	11.0930561925256
2008235	7	2008236	7	24	0.00417361557879985	2.25847444729879
2008236	7	2008237	7	24	3.29348198180244e-05	0.0908194606988866
2008237	7	2008238	7	24	0	4.88811804753722e-11
2008238	7	2008239	7	24	1.91339705148168e-06	8.9716604149059e-08
2008239	7	2008240	7	24	0.000388786745301104	8.51183930652135
2008240	7	2008241	7	24	9.44542127306086e-06	3.09050853421354
2008241	7	2008242	7	24	0.000172524354247177	3.12573722526538
2008242	7	2008243	7	24	0.00290324062580187	6.82973906064436
2008243	7	2008244	7	17	3.6598086157259e-06	0.00254659494757282
