# Supplementary material for: A comparison of sea salt emission parameterizations in northwestern Europe using a chemistry transport model setup
Source: Copernicus journal article supplement (doi:10.5194/acp-16-9905-2016), 2016-08-08
Supplement: Supplementary file 2 [file acp-16-9905-2016-supplement.zip › wetdep/wetdep.timeseries.values.NO0015R.sp13.moreStations.csv]

doy_start	hour_start	doy_end	hour_end	n_vals	Na in kg/ha/d	precip in mm/d
2008001	7	2008002	7	24	0	0
2008002	7	2008003	7	24	0	0
2008003	7	2008004	7	24	0	0
2008004	7	2008005	7	24	0	0
2008005	7	2008006	7	24	0	0
2008006	7	2008007	7	24	0	0
2008007	7	2008008	7	24	0	0
2008008	7	2008009	7	24	0	0
2008009	7	2008010	7	24	0	0
2008010	7	2008011	7	24	0	0
2008011	7	2008012	7	24	0	0
2008012	7	2008013	7	24	0	1.19013351267578e-10
2008013	7	2008014	7	24	1.69230453755205e-11	5.06027549845915e-09
2008014	7	2008015	7	24	0	8.39213111980194e-12
2008015	7	2008016	7	24	1.98057210046189e-08	3.88519083571737e-06
2008016	7	2008017	7	24	0	4.65927413296173e-15
2008017	7	2008018	7	24	0	0
2008018	7	2008019	7	24	0	0
2008019	7	2008020	7	24	0	9.94551765914193e-09
2008020	7	2008021	7	24	0	9.47422770390585e-12
2008021	7	2008022	7	24	0	0
2008022	7	2008023	7	24	0	0
2008023	7	2008024	7	24	4.75506628788966e-11	1.25725774875315e-09
2008024	7	2008025	7	24	3.41995584013419e-11	0.0474841480118583
2008025	7	2008026	7	24	0	2.53886505706231e-15
2008026	7	2008027	7	24	0	0
2008027	7	2008028	7	24	4.12265367744806e-12	4.47460231844596e-10
2008028	7	2008029	7	24	1.086043552096	13.6889567982778
2008029	7	2008030	7	24	0	0
2008030	7	2008031	7	24	0	2.20444590180854e-12
2008031	7	2008032	7	24	0	0
2008032	7	2008033	7	24	0	0
2008033	7	2008034	7	24	2.08710635018084e-10	2.23159068481193e-08
2008034	7	2008035	7	24	7.35084358096869e-11	3.75324658505316e-09
2008035	7	2008036	7	24	0	0
2008036	7	2008037	7	24	0	0
2008037	7	2008038	7	24	1.88968860959081e-14	2.68088632890406e-11
2008038	7	2008039	7	24	8.33318946968443e-11	1.31335264156609e-09
2008039	7	2008040	7	24	0.000163170464267627	0.0543612913469572
2008040	7	2008041	7	24	0.0913357833163982	4.28822784032142
2008041	7	2008042	7	24	0.00312063351834295	0.490026574076242
2008042	7	2008043	7	24	1.21615385246994e-06	0.000241812997952486
2008043	7	2008044	7	24	0.0161753206340313	1.88148418131626
2008044	7	2008045	7	24	0	0
2008045	7	2008046	7	24	0	0
2008046	7	2008047	7	24	4.35777438613505e-11	0.00308659124279071
2008047	7	2008048	7	24	0.0300957791648625	0.358813640865419
2008048	7	2008049	7	24	0.00996725366506504	0.590734879002281
2008049	7	2008050	7	24	0	0
2008050	7	2008051	7	24	0	0.0376786839233267
2008051	7	2008052	7	24	0	0.0298595569710872
2008052	7	2008053	7	24	2.04779173851311e-08	0.00163552396186484
2008053	7	2008054	7	24	0.0290831454513795	0.99178305378417
2008054	7	2008055	7	24	0	1.87628923886105e-07
2008055	7	2008056	7	24	0.0715741052259349	1.24032869799943
2008056	7	2008057	7	24	0	1.36516431319122e-08
2008057	7	2008058	7	24	0	0
2008058	7	2008059	7	24	0	1.82587159909715e-09
2008059	7	2008060	7	24	0	0
2008060	7	2008061	7	17	0	0
2008182	7	2008183	7	7	0.00369824120611608	2.76738141465448
2008183	7	2008184	7	24	0.00127841284167372	3.18283818617401
2008184	7	2008185	7	24	0	0
2008185	7	2008186	7	24	0	0
2008186	7	2008187	7	24	4.96472270020112e-17	4.62155873737647e-12
2008187	7	2008188	7	24	2.77617673363765e-07	0.206119742779124
2008188	7	2008189	7	24	6.28614506497704e-08	0.223268149270741
2008189	7	2008190	7	24	0	0.000539596912858542
2008190	7	2008191	7	24	0	0
2008191	7	2008192	7	24	0.00154261022826849	0.151509275881432
2008192	7	2008193	7	24	0.000239701034662049	0.238671735393135
2008193	7	2008194	7	24	0	7.35795728816144e-11
2008194	7	2008195	7	24	0.00320637695120798	0.607289873030572
2008195	7	2008196	7	24	0.00275591157506767	2.4605124179816
2008196	7	2008197	7	24	0.0293760941340439	5.58114640770473
2008197	7	2008198	7	24	0.0452158169135371	8.63223798372928
2008198	7	2008199	7	24	0.0534720524514511	6.2297326943572
2008199	7	2008200	7	24	0.0278585289756272	4.69022319566813
2008200	7	2008201	7	24	0.00526878346325911	5.74686137214405
2008201	7	2008202	7	24	0.00137075552181159	2.3044999222605
2008202	7	2008203	7	24	0.000212102380183344	1.0085780641035
2008203	7	2008204	7	24	0.00165008474167304	1.10864385979961
2008204	7	2008205	7	24	0.0818894973357214	3.70086883385646
2008205	7	2008206	7	24	0.12919051215605	1.93430713334806
2008206	7	2008207	7	24	7.38027729591658e-06	0.000329673101173711
2008207	7	2008208	7	24	0	0
2008208	7	2008209	7	24	0	0
2008209	7	2008210	7	24	5.20337513178757e-05	0.319046617968426
2008210	7	2008211	7	24	0	1.07294351181508e-07
2008211	7	2008212	7	24	0	0
2008212	7	2008213	7	24	0.000690349681536253	0.260030537028923
2008213	7	2008214	7	24	0.000142627286841162	0.290319518907617
2008214	7	2008215	7	24	0	0
2008215	7	2008216	7	24	9.79714946037741e-06	0.00253900112579375
2008216	7	2008217	7	24	8.1673029600176e-06	0.0252224116213603
2008217	7	2008218	7	24	0	7.4612739848748e-09
2008218	7	2008219	7	24	0	1.34800996260284e-07
2008219	7	2008220	7	24	0.00590855485782723	3.20984434132558
2008220	7	2008221	7	24	0.00866047664632788	3.44990207534125
2008221	7	2008222	7	24	0.00163001453574824	0.365541722435286
2008222	7	2008223	7	24	0.00286283432640881	1.00030635413062
2008223	7	2008224	7	24	2.65621881226252e-06	0.447003864394012
2008224	7	2008225	7	24	0.009926401105281	5.68201792048058
2008225	7	2008226	7	24	0.00798058571422183	3.04536464987259
2008226	7	2008227	7	24	0.0189384657816654	17.5578586236463
2008227	7	2008228	7	24	0.0161624039808017	6.48073526044645
2008228	7	2008229	7	24	0.00275237606765586	0.640585433844877
2008229	7	2008230	7	24	0	0
2008230	7	2008231	7	24	0	0.0137216856493297
2008231	7	2008232	7	24	0.00634219897446148	7.80954001578044
2008232	7	2008233	7	24	0.000551776763335852	4.89045341644669
2008233	7	2008234	7	24	0.00276001636865704	1.96701829127577
2008234	7	2008235	7	24	0.0311877370546995	11.0930561925256
2008235	7	2008236	7	24	0.0131556828375324	2.25847444729879
2008236	7	2008237	7	24	7.86900512027222e-05	0.0908194606988866
2008237	7	2008238	7	24	0	4.88811804753722e-11
2008238	7	2008239	7	24	8.77119603887727e-06	8.9716604149059e-08
2008239	7	2008240	7	24	0.00223537348451373	8.51183930652135
2008240	7	2008241	7	24	2.53833781994827e-05	3.09050853421354
2008241	7	2008242	7	24	0.000712027735406303	3.12573722526538
2008242	7	2008243	7	24	0.00912898162221767	6.82973906064436
2008243	7	2008244	7	17	9.7702634140265e-06	0.00254659494757282
