# Supplementary material for: A comparison of sea salt emission parameterizations in northwestern Europe using a chemistry transport model setup
Source: Copernicus journal article supplement (doi:10.5194/acp-16-9905-2016), 2016-08-08
Supplement: Supplementary file 2 [file acp-16-9905-2016-supplement.zip › wetdep/wetdep.timeseries.values.NO0039R.ov14.moreStations.csv]

doy_start	hour_start	doy_end	hour_end	n_vals	Na in kg/ha/d	precip in mm/d
2008001	7	2008002	7	24	0	0
2008002	7	2008003	7	24	0	0
2008003	7	2008004	7	24	0	0
2008004	7	2008005	7	24	0	0
2008005	7	2008006	7	24	0	0
2008006	7	2008007	7	24	0.00355885664233938	0.349301001958161
2008007	7	2008008	7	24	0	0.227343459041302
2008008	7	2008009	7	24	0	1.39381808503779e-11
2008009	7	2008010	7	24	0	7.61473054943896e-08
2008010	7	2008011	7	24	0	2.79187202084077e-08
2008011	7	2008012	7	24	0	0.0879276239987104
2008012	7	2008013	7	24	0	0.0168774441429045
2008013	7	2008014	7	24	0	0.118063439382212
2008014	7	2008015	7	24	0	1.65124500752694e-08
2008015	7	2008016	7	24	0	0.0492752911231337
2008016	7	2008017	7	24	0	7.1523086370151e-07
2008017	7	2008018	7	24	0	0
2008018	7	2008019	7	24	0	1.66929893389081e-08
2008019	7	2008020	7	24	6.27283183859614e-11	2.86766944921149e-07
2008020	7	2008021	7	24	2.00846773782716e-12	0.0199036637567595
2008021	7	2008022	7	24	1.21750886228384e-11	9.43407583013666e-08
2008022	7	2008023	7	24	2.62498566505987e-11	3.08752753615596e-09
2008023	7	2008024	7	24	0.00633904804788365	0.111097700187858
2008024	7	2008025	7	24	2.12372387207722e-12	0.474391278420498
2008025	7	2008026	7	24	0.00271178183043534	0.276398685030974
2008026	7	2008027	7	24	3.44968797905663e-13	6.02228079493805e-09
2008027	7	2008028	7	24	0.0185088946948122	1.48651705861994
2008028	7	2008029	7	24	0.00202358850040127	2.4560765052067
2008029	7	2008030	7	24	3.12773189966513e-10	0.299491487918407
2008030	7	2008031	7	24	0	0.00686518197018737
2008031	7	2008032	7	24	0	0
2008032	7	2008033	7	24	3.02438596546219e-12	4.40824319529346e-08
2008033	7	2008034	7	24	0	0
2008034	7	2008035	7	24	0	0
2008035	7	2008036	7	24	0	0
2008036	7	2008037	7	24	0	3.96484605563741e-08
2008037	7	2008038	7	24	0	0.0107327786167673
2008038	7	2008039	7	24	0	0.00176416798258665
2008039	7	2008040	7	24	0.00106507092851444	1.25462274532765
2008040	7	2008041	7	24	0.00730912599157179	1.65582529232468
2008041	7	2008042	7	24	0	0.0384377791567658
2008042	7	2008043	7	24	0	4.9455722006714e-12
2008043	7	2008044	7	24	0.00264731497590217	2.73192187232597
2008044	7	2008045	7	24	3.8403677828959e-12	1.79466152008811e-09
2008045	7	2008046	7	24	0	0
2008046	7	2008047	7	24	0	3.23845757322646e-13
2008047	7	2008048	7	24	0	0.62846994341657
2008048	7	2008049	7	24	0.0118504866764965	3.93582418560982
2008049	7	2008050	7	24	0	0.350507795928934
2008050	7	2008051	7	24	7.27673459527978e-05	0.729446646146243
2008051	7	2008052	7	24	8.18384664437133e-05	0.0493991779614259
2008052	7	2008053	7	24	0.00913941849566177	2.71658010112459
2008053	7	2008054	7	24	0.0105137039650087	0.685867640998634
2008054	7	2008055	7	24	0.00115370486909309	0.953212197329494
2008055	7	2008056	7	24	1.59699861881095e-05	0.0642631443429638
2008056	7	2008057	7	24	6.11741808281791e-14	0.0171858038726342
2008057	7	2008058	7	24	0.00296859423047863	0.755299492403687
2008058	7	2008059	7	24	0	0.00340172429471178
2008059	7	2008060	7	24	4.08408028937118e-15	0.0111017971386576
2008060	7	2008061	7	17	0	1.50881510424738e-09
2008182	7	2008183	7	7	0.00455726809298313	17.0858077506672
2008183	7	2008184	7	24	9.44363233326117e-05	0.191432383770162
2008184	7	2008185	7	24	0	0.000676810486766044
2008185	7	2008186	7	24	0	0
2008186	7	2008187	7	24	0	1.5110335908669e-11
2008187	7	2008188	7	24	1.61710347881918e-10	5.62215031106405e-07
2008188	7	2008189	7	24	0.000618079818014223	0.705432277818361
2008189	7	2008190	7	24	0	3.02417578602362e-05
2008190	7	2008191	7	24	0	0.0133111247854828
2008191	7	2008192	7	24	6.37913183508772e-13	1.01877291111817e-09
2008192	7	2008193	7	24	1.89648618798372e-13	2.9244137434996e-06
2008193	7	2008194	7	24	0.00105796343867069	4.10262224051019
2008194	7	2008195	7	24	0.00197556223541806	9.64174075562108
2008195	7	2008196	7	24	0.00573204209410514	6.30800808823551
2008196	7	2008197	7	24	0.00329407810934811	6.30993024802137
2008197	7	2008198	7	24	0.00259588527814465	4.60609177505935
2008198	7	2008199	7	24	0.0169749170980008	4.17487622569023
2008199	7	2008200	7	24	0.0139260208518251	9.13722276950866
2008200	7	2008201	7	24	0.00203455645476936	4.40189223218113
2008201	7	2008202	7	24	3.59031619538708e-14	0.183438708805567
2008202	7	2008203	7	24	0.000528406980382394	5.3873444783969
2008203	7	2008204	7	24	0.000415904521954328	3.32219168664908
2008204	7	2008205	7	24	2.90661467510079e-05	0.880404595812028
2008205	7	2008206	7	24	4.80224207712944e-05	1.01868426229711
2008206	7	2008207	7	24	0	0.0406523700803518
2008207	7	2008208	7	24	0.000370890108888489	2.74891255889088
2008208	7	2008209	7	24	8.68839794861742e-05	0.888950696680695
2008209	7	2008210	7	24	0.00052576221878553	3.97821046411991
2008210	7	2008211	7	24	0.000692018569352513	3.78306573005046
2008211	7	2008212	7	24	0.000472536620964093	2.05110099778306
2008212	7	2008213	7	24	0	9.13814904648924e-08
2008213	7	2008214	7	24	0	0.0953533733263612
2008214	7	2008215	7	24	0	0
2008215	7	2008216	7	24	0.000240803292304008	1.95358507961125
2008216	7	2008217	7	24	4.28944652439839e-05	2.62294541163032
2008217	7	2008218	7	24	0	0.000451740292621348
2008218	7	2008219	7	24	0.00214712527400479	39.1790371685056
2008219	7	2008220	7	24	0.01303799671874	24.6278894486214
2008220	7	2008221	7	24	0.00204014562991825	6.53923243142811
2008221	7	2008222	7	24	0.0117746163720767	4.82263947895262
2008222	7	2008223	7	24	0.00129509807889419	0.435607529607725
2008223	7	2008224	7	24	4.14140588540399e-05	0.457335988813165
2008224	7	2008225	7	24	0.00669856376128711	5.98954617563326
2008225	7	2008226	7	24	0.00184988788816554	3.94452265480574
2008226	7	2008227	7	24	0.00616979892552781	16.9100557130679
2008227	7	2008228	7	24	0.0513095235741369	18.0891972427222
2008228	7	2008229	7	24	0	3.12134245791166e-09
2008229	7	2008230	7	24	0.000687307320213222	1.5375390789053
2008230	7	2008231	7	24	0	0.00773059714412861
2008231	7	2008232	7	24	0.000470833744994032	11.0502039493592
2008232	7	2008233	7	24	0.000320434183533038	4.60235416889191
2008233	7	2008234	7	24	0.00344503365991827	1.03497567989507
2008234	7	2008235	7	24	0.0102105092775863	4.77591601724271
2008235	7	2008236	7	24	5.20069721155282e-05	0.0490093726721179
2008236	7	2008237	7	24	0	1.65826319493545e-07
2008237	7	2008238	7	24	0	2.71481010770885e-12
2008238	7	2008239	7	24	0.00352624265043119	6.82926919495925
2008239	7	2008240	7	24	0.00281483882123029	1.28256563808827
2008240	7	2008241	7	24	0.0132542130915544	6.87786797020346
2008241	7	2008242	7	24	0.00269035257726273	0.850676298175319
2008242	7	2008243	7	24	0.000296113948438972	0.412110725477721
2008243	7	2008244	7	17	0.0273404685924351	14.5370377778275
