# Supplementary material for: A comparison of sea salt emission parameterizations in northwestern Europe using a chemistry transport model setup
Source: Copernicus journal article supplement (doi:10.5194/acp-16-9905-2016), 2016-08-08
Supplement: Supplementary file 2 [file acp-16-9905-2016-supplement.zip › wetdep/wetdep.timeseries.values.NO0056R.base.moreStations.csv]

doy_start	hour_start	doy_end	hour_end	n_vals	Na in kg/ha/d	precip in mm/d
2008001	7	2008002	7	24	0	0
2008002	7	2008003	7	24	0	0
2008003	7	2008004	7	24	0	0
2008004	7	2008005	7	24	0	0
2008005	7	2008006	7	24	0	0
2008006	7	2008007	7	24	1.05783855508539e-05	3.80686566620499e-06
2008007	7	2008008	7	24	0.000155087306526411	0.0140250552162709
2008008	7	2008009	7	24	3.86842454021578e-11	3.15272791536348e-09
2008009	7	2008010	7	24	0.000341435611376555	0.0088751317845438
2008010	7	2008011	7	24	0.000602541602660267	0.0516961859371901
2008011	7	2008012	7	24	1.12040443199166e-11	0.000474900408182488
2008012	7	2008013	7	24	0	0
2008013	7	2008014	7	24	0.00615674357694138	0.203812348768594
2008014	7	2008015	7	24	0.00152466290539594	0.00893052351666921
2008015	7	2008016	7	24	0.019551525226241	1.11425996751557
2008016	7	2008017	7	24	0.0054731601238268	1.71333044963561
2008017	7	2008018	7	24	1.9523178287314e-05	0.0180312800673432
2008018	7	2008019	7	24	0.000525793689951448	0.0445625670088428
2008019	7	2008020	7	24	2.83138328824317e-10	0.000240802818920471
2008020	7	2008021	7	24	0	5.90869666881384e-13
2008021	7	2008022	7	24	0	0
2008022	7	2008023	7	24	0	0
2008023	7	2008024	7	24	1.62330798837544e-07	0.00624143783825437
2008024	7	2008025	7	24	2.77003599485209e-11	0.0280062146786692
2008025	7	2008026	7	24	3.44953618898469e-10	0.00353248790539974
2008026	7	2008027	7	24	0	0.0214540890374337
2008027	7	2008028	7	24	0	2.31362270921437e-11
2008028	7	2008029	7	24	1.80587919452521e-13	2.86259760258703e-09
2008029	7	2008030	7	24	5.74958415220643e-07	0.00031678273722326
2008030	7	2008031	7	24	0	0
2008031	7	2008032	7	24	4.35770063603682e-14	0.00213232471083502
2008032	7	2008033	7	24	6.37610814918516e-11	3.90260558582808e-07
2008033	7	2008034	7	24	0	0
2008034	7	2008035	7	24	0	0
2008035	7	2008036	7	24	0	0
2008036	7	2008037	7	24	1.62540787732236e-10	3.73425252590816e-09
2008037	7	2008038	7	24	0	2.39280871158765e-09
2008038	7	2008039	7	24	0.000174827642319666	0.0413312871630853
2008039	7	2008040	7	24	1.49248191192143e-05	0.000258886321526113
2008040	7	2008041	7	24	5.83493224895188e-06	0.00574103707368862
2008041	7	2008042	7	24	0.0013236261000209	0.22318843058067
2008042	7	2008043	7	24	3.20781029404451e-14	9.18518360600463e-13
2008043	7	2008044	7	24	2.43911892623814e-15	3.53219989607072e-13
2008044	7	2008045	7	24	0	0
2008045	7	2008046	7	24	0	0
2008046	7	2008047	7	24	0	0
2008047	7	2008048	7	24	0	0
2008048	7	2008049	7	24	0.000322936285919597	0.0944996156222159
2008049	7	2008050	7	24	0	0.00698269664838248
2008050	7	2008051	7	24	5.37701780053978e-16	2.33216310677089e-11
2008051	7	2008052	7	24	2.26192213445646e-06	4.90608011353648e-05
2008052	7	2008053	7	24	0.00130917042060458	0.333549761829755
2008053	7	2008054	7	24	2.89405133128973e-09	1.6824570180255e-05
2008054	7	2008055	7	24	0.000114462508767985	0.145200216163531
2008055	7	2008056	7	24	2.53470715874671e-10	0.000923075674938206
2008056	7	2008057	7	24	3.47622309443558e-11	5.08894054333804e-08
2008057	7	2008058	7	24	0.000194399468144535	0.0420873961215579
2008058	7	2008059	7	24	0	0.0112270424602484
2008059	7	2008060	7	24	0	1.0551929832934e-08
2008060	7	2008061	7	17	0	1.14259614439896e-06
2008182	7	2008183	7	7	0	1.9802143555855e-10
2008183	7	2008184	7	24	0	3.70906213728595e-11
2008184	7	2008185	7	24	0	0
2008185	7	2008186	7	24	0	0
2008186	7	2008187	7	24	1.66023402992099e-08	0.000228257636081253
2008187	7	2008188	7	24	0.00024658443469803	0.902893817153193
2008188	7	2008189	7	24	0.00288608235773062	14.6027058346605
2008189	7	2008190	7	24	0.000918031190760473	5.34285102592548
2008190	7	2008191	7	24	3.41014740815604e-07	0.0478954628998525
2008191	7	2008192	7	24	0	0
2008192	7	2008193	7	24	0.00387234114063178	1.1805754444104
2008193	7	2008194	7	24	0.00495726596403693	6.48101943809306
2008194	7	2008195	7	24	0.0225432676589024	8.72121853330819
2008195	7	2008196	7	24	0.00621541611242599	0.781093138075522
2008196	7	2008197	7	24	2.38876825798308e-06	0.0544678421363136
2008197	7	2008198	7	24	6.53372338297618e-05	0.544125771247296
2008198	7	2008199	7	24	3.65284077117895e-10	0.276454171678477
2008199	7	2008200	7	24	0.000967636128333333	0.625837708215439
2008200	7	2008201	7	24	0.000694812710510404	0.30950797051623
2008201	7	2008202	7	24	0.000568835454493719	2.18169825270142
2008202	7	2008203	7	24	0.00047127002006165	2.79341874209994
2008203	7	2008204	7	24	0.000349396385199725	2.44401903840185
2008204	7	2008205	7	24	0	1.23100983576846e-06
2008205	7	2008206	7	24	0	0
2008206	7	2008207	7	24	0	0
2008207	7	2008208	7	24	0	0
2008208	7	2008209	7	24	0	0
2008209	7	2008210	7	24	0	0
2008210	7	2008211	7	24	0	0
2008211	7	2008212	7	24	9.16801838164988e-14	3.31281623688244e-09
2008212	7	2008213	7	24	0	1.23025159504131e-09
2008213	7	2008214	7	24	0.00045956972595377	0.771803358606342
2008214	7	2008215	7	24	1.04048238953369e-13	0.00682628091031096
2008215	7	2008216	7	24	0.000640201261978339	19.8136513553325
2008216	7	2008217	7	24	0.00413061550852035	5.47914886853731
2008217	7	2008218	7	24	0.00633932972364901	6.91266078211851
2008218	7	2008219	7	24	0.000289189054761484	0.15957702640201
2008219	7	2008220	7	24	0.00891456825823598	3.19752341637015
2008220	7	2008221	7	24	0.00202899808116006	15.0337868846014
2008221	7	2008222	7	24	1.11142875521681e-17	6.52534219151466e-08
2008222	7	2008223	7	24	0.005353825358834	6.63260410240624
2008223	7	2008224	7	24	0.00781687224942614	10.556275089719
2008224	7	2008225	7	24	1.43905019189359e-11	0.0903619638013181
2008225	7	2008226	7	24	0.0461710994940668	14.9363640162749
2008226	7	2008227	7	24	0.0322807903616083	11.5541063233368
2008227	7	2008228	7	24	0.0102502807319959	9.69208864878046
2008228	7	2008229	7	24	1.428490095042e-06	0.00236698816653637
2008229	7	2008230	7	24	2.79483276277172e-05	0.0328612628256049
2008230	7	2008231	7	24	0.000835095868869757	7.07424720420651
2008231	7	2008232	7	24	0.000428258867076166	3.56375901347731
2008232	7	2008233	7	24	0.00256015842134481	0.671036025268442
2008233	7	2008234	7	24	0.00733784960961255	2.43864842392218
2008234	7	2008235	7	24	0.0110790942986703	9.6188456025255
2008235	7	2008236	7	24	4.59157700537163e-10	0.0693448673594
2008236	7	2008237	7	24	0	3.88823929252567e-10
2008237	7	2008238	7	24	0	0
2008238	7	2008239	7	24	0.0242400770248559	4.93015898273356
2008239	7	2008240	7	24	1.83093220700974e-05	0.364636539095957
2008240	7	2008241	7	24	0.00255541590321014	4.12391275156841
2008241	7	2008242	7	24	0	0.124218339624349
2008242	7	2008243	7	24	0	0
2008243	7	2008244	7	17	3.01813684102028e-12	1.54249606347605e-11
