# Supplementary material for: A comparison of sea salt emission parameterizations in northwestern Europe using a chemistry transport model setup
Source: Copernicus journal article supplement (doi:10.5194/acp-16-9905-2016), 2016-08-08
Supplement: Supplementary file 2 [file acp-16-9905-2016-supplement.zip › wetdep/wetdep.timeseries.values.NO0056R.ov14.moreStations.csv]

doy_start	hour_start	doy_end	hour_end	n_vals	Na in kg/ha/d	precip in mm/d
2008001	7	2008002	7	24	0	0
2008002	7	2008003	7	24	0	0
2008003	7	2008004	7	24	0	0
2008004	7	2008005	7	24	0	0
2008005	7	2008006	7	24	0	0
2008006	7	2008007	7	24	3.94145507510013e-06	3.80686566620499e-06
2008007	7	2008008	7	24	5.43629875281226e-05	0.0140250552162709
2008008	7	2008009	7	24	1.12835359521419e-11	3.15272791536348e-09
2008009	7	2008010	7	24	0.000109406790455902	0.0088751317845438
2008010	7	2008011	7	24	0.000200656790499352	0.0516961859371901
2008011	7	2008012	7	24	5.11061314361488e-12	0.000474900408182488
2008012	7	2008013	7	24	0	0
2008013	7	2008014	7	24	0.00191717211125735	0.203812348768594
2008014	7	2008015	7	24	0.000385673321989511	0.00893052351666921
2008015	7	2008016	7	24	0.00765753092741827	1.11425996751557
2008016	7	2008017	7	24	0.00136676812268604	1.71333044963561
2008017	7	2008018	7	24	4.77519754943249e-06	0.0180312800673432
2008018	7	2008019	7	24	0.000131294067338875	0.0445625670088428
2008019	7	2008020	7	24	7.49519526652143e-11	0.000240802818920471
2008020	7	2008021	7	24	0	5.90869666881384e-13
2008021	7	2008022	7	24	0	0
2008022	7	2008023	7	24	0	0
2008023	7	2008024	7	24	6.298717180291e-08	0.00624143783825437
2008024	7	2008025	7	24	7.72702170477591e-12	0.0280062146786692
2008025	7	2008026	7	24	1.01793983580886e-10	0.00353248790539974
2008026	7	2008027	7	24	0	0.0214540890374337
2008027	7	2008028	7	24	0	2.31362270921437e-11
2008028	7	2008029	7	24	1.12244602769669e-13	2.86259760258703e-09
2008029	7	2008030	7	24	3.46729308473762e-07	0.00031678273722326
2008030	7	2008031	7	24	0	0
2008031	7	2008032	7	24	1.4701246878411e-14	0.00213232471083502
2008032	7	2008033	7	24	2.29513551052772e-11	3.90260558582808e-07
2008033	7	2008034	7	24	0	0
2008034	7	2008035	7	24	0	0
2008035	7	2008036	7	24	0	0
2008036	7	2008037	7	24	5.21950123424773e-11	3.73425252590816e-09
2008037	7	2008038	7	24	0	2.39280871158765e-09
2008038	7	2008039	7	24	8.2689332934098e-05	0.0413312871630853
2008039	7	2008040	7	24	8.95374047577204e-06	0.000258886321526113
2008040	7	2008041	7	24	4.59454427208963e-06	0.00574103707368862
2008041	7	2008042	7	24	0.000754907407609835	0.22318843058067
2008042	7	2008043	7	24	1.40923918074566e-14	9.18518360600463e-13
2008043	7	2008044	7	24	7.75279362218246e-16	3.53219989607072e-13
2008044	7	2008045	7	24	0	0
2008045	7	2008046	7	24	0	0
2008046	7	2008047	7	24	0	0
2008047	7	2008048	7	24	0	0
2008048	7	2008049	7	24	0.00016924284054505	0.0944996156222159
2008049	7	2008050	7	24	0	0.00698269664838248
2008050	7	2008051	7	24	2.42658959425247e-16	2.33216310677089e-11
2008051	7	2008052	7	24	3.58718107344274e-07	4.90608011353648e-05
2008052	7	2008053	7	24	0.000366712499551924	0.333549761829755
2008053	7	2008054	7	24	8.51750763825737e-10	1.6824570180255e-05
2008054	7	2008055	7	24	4.56090140444024e-05	0.145200216163531
2008055	7	2008056	7	24	8.83826715980529e-11	0.000923075674938206
2008056	7	2008057	7	24	1.71548178106143e-11	5.08894054333804e-08
2008057	7	2008058	7	24	4.74382833729271e-05	0.0420873961215579
2008058	7	2008059	7	24	0	0.0112270424602484
2008059	7	2008060	7	24	0	1.0551929832934e-08
2008060	7	2008061	7	17	0	1.14259614439896e-06
2008182	7	2008183	7	7	0	1.9802143555855e-10
2008183	7	2008184	7	24	0	3.70906213728595e-11
2008184	7	2008185	7	24	0	0
2008185	7	2008186	7	24	0	0
2008186	7	2008187	7	24	5.09994205907804e-09	0.000228257636081253
2008187	7	2008188	7	24	2.01716396832991e-05	0.902893817153193
2008188	7	2008189	7	24	0.000942782349804075	14.6027058346605
2008189	7	2008190	7	24	0.00029985527957904	5.34285102592548
2008190	7	2008191	7	24	2.02472380544105e-07	0.0478954628998525
2008191	7	2008192	7	24	0	0
2008192	7	2008193	7	24	0.00193237744441462	1.1805754444104
2008193	7	2008194	7	24	0.00201091563265492	6.48101943809306
2008194	7	2008195	7	24	0.00699302998907286	8.72121853330819
2008195	7	2008196	7	24	0.00138441193988221	0.781093138075522
2008196	7	2008197	7	24	1.98702655699364e-06	0.0544678421363136
2008197	7	2008198	7	24	5.59395420551171e-05	0.544125771247296
2008198	7	2008199	7	24	1.49864303131955e-10	0.276454171678477
2008199	7	2008200	7	24	0.000587770663804142	0.625837708215439
2008200	7	2008201	7	24	0.000570545946304381	0.30950797051623
2008201	7	2008202	7	24	0.000451531377871224	2.18169825270142
2008202	7	2008203	7	24	0.00117599014676672	2.79341874209994
2008203	7	2008204	7	24	0.000572527871008788	2.44401903840185
2008204	7	2008205	7	24	0	1.23100983576846e-06
2008205	7	2008206	7	24	0	0
2008206	7	2008207	7	24	0	0
2008207	7	2008208	7	24	0	0
2008208	7	2008209	7	24	0	0
2008209	7	2008210	7	24	0	0
2008210	7	2008211	7	24	0	0
2008211	7	2008212	7	24	1.23992188561714e-13	3.31281623688244e-09
2008212	7	2008213	7	24	0	1.23025159504131e-09
2008213	7	2008214	7	24	0.000103054873375186	0.771803358606342
2008214	7	2008215	7	24	1.86130458152122e-14	0.00682628091031096
2008215	7	2008216	7	24	0.000163038027977438	19.8136513553325
2008216	7	2008217	7	24	0.0016558278852176	5.47914886853731
2008217	7	2008218	7	24	0.00535443609385038	6.91266078211851
2008218	7	2008219	7	24	8.69537871771652e-05	0.15957702640201
2008219	7	2008220	7	24	0.00309225488969298	3.19752341637015
2008220	7	2008221	7	24	0.000659526391282868	15.0337868846014
2008221	7	2008222	7	24	7.01305340847661e-18	6.52534219151466e-08
2008222	7	2008223	7	24	0.00244400861098256	6.63260410240624
2008223	7	2008224	7	24	0.00393805172417408	10.556275089719
2008224	7	2008225	7	24	7.64514799293108e-12	0.0903619638013181
2008225	7	2008226	7	24	0.0121187481477575	14.9363640162749
2008226	7	2008227	7	24	0.011687688292927	11.5541063233368
2008227	7	2008228	7	24	0.00965545889101019	9.69208864878046
2008228	7	2008229	7	24	4.91048618779157e-07	0.00236698816653637
2008229	7	2008230	7	24	1.2580162864002e-05	0.0328612628256049
2008230	7	2008231	7	24	0.000555473077289008	7.07424720420651
2008231	7	2008232	7	24	0.000291333336255651	3.56375901347731
2008232	7	2008233	7	24	0.00123093928579926	0.671036025268442
2008233	7	2008234	7	24	0.00441526925764284	2.43864842392218
2008234	7	2008235	7	24	0.00273539797373298	9.6188456025255
2008235	7	2008236	7	24	1.34824841839003e-09	0.0693448673594
2008236	7	2008237	7	24	0	3.88823929252567e-10
2008237	7	2008238	7	24	0	0
2008238	7	2008239	7	24	0.00976798443947645	4.93015898273356
2008239	7	2008240	7	24	1.22070413512665e-05	0.364636539095957
2008240	7	2008241	7	24	0.00221236975160277	4.12391275156841
2008241	7	2008242	7	24	0	0.124218339624349
2008242	7	2008243	7	24	0	0
2008243	7	2008244	7	17	1.53662741294459e-12	1.54249606347605e-11
