# Supplementary material for: A comparison of sea salt emission parameterizations in northwestern Europe using a chemistry transport model setup
Source: Copernicus journal article supplement (doi:10.5194/acp-16-9905-2016), 2016-08-08
Supplement: Supplementary file 2 [file acp-16-9905-2016-supplement.zip › wetdep/wetdep.timeseries.values.NO0056R.zero.moreStations.csv]

doy_start	hour_start	doy_end	hour_end	n_vals	Na in kg/ha/d	precip in mm/d
2008001	7	2008002	7	24	0	0
2008002	7	2008003	7	24	0	0
2008003	7	2008004	7	24	0	0
2008004	7	2008005	7	24	0	0
2008005	7	2008006	7	24	0	0
2008006	7	2008007	7	24	2.27981235362352e-22	3.80686566620499e-06
2008007	7	2008008	7	24	4.39238433394622e-21	0.0140250552162709
2008008	7	2008009	7	24	1.7897528527408e-27	3.15272791536348e-09
2008009	7	2008010	7	24	6.98124468494693e-21	0.0088751317845438
2008010	7	2008011	7	24	2.09163704058092e-20	0.0516961859371901
2008011	7	2008012	7	24	7.35090412102715e-28	0.000474900408182488
2008012	7	2008013	7	24	0	0
2008013	7	2008014	7	24	2.69760277041514e-20	0.203812348768594
2008014	7	2008015	7	24	1.61977977590015e-20	0.00893052351666921
2008015	7	2008016	7	24	6.54365524189804e-19	1.11425996751557
2008016	7	2008017	7	24	2.81095887938842e-19	1.71333044963561
2008017	7	2008018	7	24	1.07171463847555e-22	0.0180312800673432
2008018	7	2008019	7	24	1.27991102718086e-20	0.0445625670088428
2008019	7	2008020	7	24	1.55234497248573e-26	0.000240802818920471
2008020	7	2008021	7	24	0	5.90869666881384e-13
2008021	7	2008022	7	24	0	0
2008022	7	2008023	7	24	0	0
2008023	7	2008024	7	24	2.09872370718051e-24	0.00624143783825437
2008024	7	2008025	7	24	2.46108908868433e-28	0.0280062146786692
2008025	7	2008026	7	24	2.96095302693042e-27	0.00353248790539974
2008026	7	2008027	7	24	0	0.0214540890374337
2008027	7	2008028	7	24	0	2.31362270921437e-11
2008028	7	2008029	7	24	5.21325141670408e-30	2.86259760258703e-09
2008029	7	2008030	7	24	1.58755825954049e-23	0.00031678273722326
2008030	7	2008031	7	24	0	0
2008031	7	2008032	7	24	1.13440309415059e-30	0.00213232471083502
2008032	7	2008033	7	24	1.95201102852023e-27	3.90260558582808e-07
2008033	7	2008034	7	24	0	0
2008034	7	2008035	7	24	0	0
2008035	7	2008036	7	24	0	0
2008036	7	2008037	7	24	6.82641866051631e-27	3.73425252590816e-09
2008037	7	2008038	7	24	0	2.39280871158765e-09
2008038	7	2008039	7	24	4.39985050343478e-21	0.0413312871630853
2008039	7	2008040	7	24	3.26609695310865e-22	0.000258886321526113
2008040	7	2008041	7	24	1.86797763314584e-22	0.00574103707368862
2008041	7	2008042	7	24	6.59894867653116e-20	0.22318843058067
2008042	7	2008043	7	24	9.49459726236904e-31	9.18518360600463e-13
2008043	7	2008044	7	24	7.85147815379088e-32	3.53219989607072e-13
2008044	7	2008045	7	24	0	0
2008045	7	2008046	7	24	0	0
2008046	7	2008047	7	24	0	0
2008047	7	2008048	7	24	0	0
2008048	7	2008049	7	24	1.72697604401938e-20	0.0944996156222159
2008049	7	2008050	7	24	0	0.00698269664838248
2008050	7	2008051	7	24	3.66533579682287e-34	2.33216310677089e-11
2008051	7	2008052	7	24	3.44747085685844e-24	4.90608011353648e-05
2008052	7	2008053	7	24	4.16602022493553e-20	0.333549761829755
2008053	7	2008054	7	24	3.88485658705038e-25	1.6824570180255e-05
2008054	7	2008055	7	24	2.4775793834921e-21	0.145200216163531
2008055	7	2008056	7	24	6.62133797367306e-27	0.000923075674938206
2008056	7	2008057	7	24	1.00484200731213e-27	5.08894054333804e-08
2008057	7	2008058	7	24	3.39211061054191e-21	0.0420873961215579
2008058	7	2008059	7	24	0	0.0112270424602484
2008059	7	2008060	7	24	0	1.0551929832934e-08
2008060	7	2008061	7	17	0	1.14259614439896e-06
2008182	7	2008183	7	7	0	1.9802143555855e-10
2008183	7	2008184	7	24	0	3.70906213728595e-11
2008184	7	2008185	7	24	0	0
2008185	7	2008186	7	24	0	0
2008186	7	2008187	7	24	6.18302039977645e-23	0.000228257636081253
2008187	7	2008188	7	24	8.94084100733796e-19	0.902893817153193
2008188	7	2008189	7	24	2.40570035687169e-18	14.6027058346605
2008189	7	2008190	7	24	8.98732354819871e-19	5.34285102592548
2008190	7	2008191	7	24	5.65402537314912e-22	0.0478954628998525
2008191	7	2008192	7	24	0	0
2008192	7	2008193	7	24	1.56400530975507e-18	1.1805754444104
2008193	7	2008194	7	24	4.52260870159222e-18	6.48101943809306
2008194	7	2008195	7	24	1.2472842827007e-17	8.72121853330819
2008195	7	2008196	7	24	3.75247623597471e-19	0.781093138075522
2008196	7	2008197	7	24	2.73617375291353e-21	0.0544678421363136
2008197	7	2008198	7	24	5.24884927044188e-19	0.544125771247296
2008198	7	2008199	7	24	5.2952209292129e-26	0.276454171678477
2008199	7	2008200	7	24	5.24542456924171e-19	0.625837708215439
2008200	7	2008201	7	24	4.15966955463287e-19	0.30950797051623
2008201	7	2008202	7	24	2.39908003377556e-18	2.18169825270142
2008202	7	2008203	7	24	3.39534754140955e-18	2.79341874209994
2008203	7	2008204	7	24	3.27357463634455e-18	2.44401903840185
2008204	7	2008205	7	24	0	1.23100983576846e-06
2008205	7	2008206	7	24	0	0
2008206	7	2008207	7	24	0	0
2008207	7	2008208	7	24	0	0
2008208	7	2008209	7	24	0	0
2008209	7	2008210	7	24	0	0
2008210	7	2008211	7	24	0	0
2008211	7	2008212	7	24	2.44834758840263e-28	3.31281623688244e-09
2008212	7	2008213	7	24	0	1.23025159504131e-09
2008213	7	2008214	7	24	8.66211464505997e-19	0.771803358606342
2008214	7	2008215	7	24	1.66299338519024e-28	0.00682628091031096
2008215	7	2008216	7	24	7.50185089086638e-18	19.8136513553325
2008216	7	2008217	7	24	6.91448708858406e-18	5.47914886853731
2008217	7	2008218	7	24	4.23338736233207e-18	6.91266078211851
2008218	7	2008219	7	24	2.55581439336404e-19	0.15957702640201
2008219	7	2008220	7	24	3.13416379201481e-18	3.19752341637015
2008220	7	2008221	7	24	9.1594620357072e-19	15.0337868846014
2008221	7	2008222	7	24	1.4640631011693e-31	6.52534219151466e-08
2008222	7	2008223	7	24	3.58677258301071e-18	6.63260410240624
2008223	7	2008224	7	24	2.9147450654255e-18	10.556275089719
2008224	7	2008225	7	24	1.82153286432172e-26	0.0903619638013181
2008225	7	2008226	7	24	3.58958059832499e-18	14.9363640162749
2008226	7	2008227	7	24	6.68037623564215e-18	11.5541063233368
2008227	7	2008228	7	24	1.92498163165559e-17	9.69208864878046
2008228	7	2008229	7	24	2.02625579475303e-21	0.00236698816653637
2008229	7	2008230	7	24	3.12618572761186e-20	0.0328612628256049
2008230	7	2008231	7	24	9.2604338700384e-19	7.07424720420651
2008231	7	2008232	7	24	4.60656894201077e-19	3.56375901347731
2008232	7	2008233	7	24	5.0529222882074e-19	0.671036025268442
2008233	7	2008234	7	24	4.91451618118125e-18	2.43864842392218
2008234	7	2008235	7	24	2.52058871074364e-17	9.6188456025255
2008235	7	2008236	7	24	1.48994482533311e-24	0.0693448673594
2008236	7	2008237	7	24	0	3.88823929252567e-10
2008237	7	2008238	7	24	0	0
2008238	7	2008239	7	24	3.37273457884658e-18	4.93015898273356
2008239	7	2008240	7	24	5.88751169932668e-21	0.364636539095957
2008240	7	2008241	7	24	9.50838900481176e-19	4.12391275156841
2008241	7	2008242	7	24	0	0.124218339624349
2008242	7	2008243	7	24	0	0
2008243	7	2008244	7	17	2.4947152324402e-28	1.54249606347605e-11
