# Supplementary material for: A comparison of sea salt emission parameterizations in northwestern Europe using a chemistry transport model setup
Source: Copernicus journal article supplement (doi:10.5194/acp-16-9905-2016), 2016-08-08
Supplement: Supplementary file 2 [file acp-16-9905-2016-supplement.zip › wetdep/wetdep.timeseries.values.NO0218R.base.moreStations.csv]

doy_start	hour_start	doy_end	hour_end	n_vals	Na in kg/ha/d	precip in mm/d
2008001	7	2008002	7	24	0	0
2008002	7	2008003	7	24	0	0
2008003	7	2008004	7	24	0	0
2008004	7	2008005	7	24	0	0
2008005	7	2008006	7	24	4.59823213441171e-14	0
2008006	7	2008007	7	24	0.00689031785388108	0.234738985840637
2008007	7	2008008	7	24	0.0196831179415548	1.6803397862823
2008008	7	2008009	7	24	7.4085379443736e-06	0.209956058923445
2008009	7	2008010	7	24	0.0256372229242956	2.11248999528688
2008010	7	2008011	7	24	0.0511455853866208	5.03827358621892
2008011	7	2008012	7	24	0.00309095037519	0.154292103285688
2008012	7	2008013	7	24	0	0
2008013	7	2008014	7	24	0.0494657977987961	1.4144205117191
2008014	7	2008015	7	24	0.0449040195963073	1.52602087750252
2008015	7	2008016	7	24	0.0936118253221957	9.31272206595168
2008016	7	2008017	7	24	0.118830680292438	15.6787513979361
2008017	7	2008018	7	24	0.00558111921252543	0.18029900214014
2008018	7	2008019	7	24	0.034020879712109	7.35027398448437
2008019	7	2008020	7	24	0.00106017270881921	0.109916849469304
2008020	7	2008021	7	24	0.0117466711643871	0.158837328489214
2008021	7	2008022	7	24	0	2.31581843545409e-12
2008022	7	2008023	7	24	0	2.75985900799469e-10
2008023	7	2008024	7	24	0.0144847374423163	5.48287253281623
2008024	7	2008025	7	24	0.0016209326687576	0.0333020082369988
2008025	7	2008026	7	24	0.00244238031548761	0.204106545580659
2008026	7	2008027	7	24	0	3.82161265756162e-08
2008027	7	2008028	7	24	3.62472248727126e-07	0.00015822575953393
2008028	7	2008029	7	24	3.45655266232994e-12	5.96652898803549e-06
2008029	7	2008030	7	24	2.62399493215634e-05	0.0465860877595324
2008030	7	2008031	7	24	0	1.24999478998779e-14
2008031	7	2008032	7	24	0.0093106365228124	0.296112453567869
2008032	7	2008033	7	24	0.0090133390875053	0.271251216132719
2008033	7	2008034	7	24	0	0
2008034	7	2008035	7	24	0.000362435441152229	0.0134637939629398
2008035	7	2008036	7	24	2.11924559547378e-08	1.59375636576975e-07
2008036	7	2008037	7	24	0.0060504928092094	0.298267009828532
2008037	7	2008038	7	24	0.00771878368824218	2.19425405169095
2008038	7	2008039	7	24	0.00425284439529535	0.573031290915651
2008039	7	2008040	7	24	1.09178909136989e-07	0.000400013591065271
2008040	7	2008041	7	24	8.43595757042856e-06	0.164397180956963
2008041	7	2008042	7	24	0.00125463502451367	0.128650759537788
2008042	7	2008043	7	24	0.00192988760887434	0.0149235285221039
2008043	7	2008044	7	24	0.000469514932613784	0.00924976465943878
2008044	7	2008045	7	24	0	0
2008045	7	2008046	7	24	0	0
2008046	7	2008047	7	24	0	0
2008047	7	2008048	7	24	0	0
2008048	7	2008049	7	24	0.000232912435987487	0.0323480464458467
2008049	7	2008050	7	24	0	0.0154267801807934
2008050	7	2008051	7	24	0.00111228833631039	0.0919372742447363
2008051	7	2008052	7	24	0.000723308983310756	0.0857953546397847
2008052	7	2008053	7	24	0.000886600992305335	0.462045208041063
2008053	7	2008054	7	24	2.33484474507764e-05	0.413569772888407
2008054	7	2008055	7	24	0.0011445290888105	0.438060076098407
2008055	7	2008056	7	24	1.51186917802734e-13	1.79078909183115e-08
2008056	7	2008057	7	24	0	0.283574386276481
2008057	7	2008058	7	24	0.0396790002394321	9.24003726149488
2008058	7	2008059	7	24	0	0.155066292484615
2008059	7	2008060	7	24	0.000369346348434192	0.0984111070861458
2008060	7	2008061	7	17	0	1.38905081649187
2008182	7	2008183	7	7	0	0
2008183	7	2008184	7	24	0	0
2008184	7	2008185	7	24	0	0
2008185	7	2008186	7	24	0	0
2008186	7	2008187	7	24	1.24171953470409e-05	0.0386520964093506
2008187	7	2008188	7	24	0.00546602010926769	1.98018814336459
2008188	7	2008189	7	24	0.00596072065198655	26.9748587423237
2008189	7	2008190	7	24	0.000541881067666866	2.56759833800061
2008190	7	2008191	7	24	6.386851348526e-13	3.65893984195402e-09
2008191	7	2008192	7	24	0	0.0315130535233266
2008192	7	2008193	7	24	0.00505759232940556	2.4008866302503
2008193	7	2008194	7	24	0.00780351080001994	3.66819471150863
2008194	7	2008195	7	24	0.0531826317980278	13.1532603983517
2008195	7	2008196	7	24	0.00322101171929859	0.627533773176804
2008196	7	2008197	7	24	4.18328810547873e-16	2.0783112114111e-09
2008197	7	2008198	7	24	0.00465855489600447	4.15538197899507
2008198	7	2008199	7	24	0	0.101171048163517
2008199	7	2008200	7	24	0.00046114515109366	0.371731971390545
2008200	7	2008201	7	24	1.76710000324707e-10	0.00204184493276494
2008201	7	2008202	7	24	0.000349355199578179	1.855948313475
2008202	7	2008203	7	24	0.000790568612470477	6.09491863298213
2008203	7	2008204	7	24	0.000388969900905067	2.66911352242575
2008204	7	2008205	7	24	0	1.48546490863141e-11
2008205	7	2008206	7	24	0	0
2008206	7	2008207	7	24	0	0
2008207	7	2008208	7	24	0	7.21285502436331e-07
2008208	7	2008209	7	24	0	0
2008209	7	2008210	7	24	0	0
2008210	7	2008211	7	24	0	0
2008211	7	2008212	7	24	0	0
2008212	7	2008213	7	24	0	0
2008213	7	2008214	7	24	0	0.000142139724630397
2008214	7	2008215	7	24	0	0
2008215	7	2008216	7	24	0.00103051591136272	11.7564881657097
2008216	7	2008217	7	24	0.00479199296030856	3.62967355833094
2008217	7	2008218	7	24	0.00553041816481086	9.56505119568425
2008218	7	2008219	7	24	5.66347009731011e-05	0.0131107138583769
2008219	7	2008220	7	24	0.0111030676309921	8.72643820801997
2008220	7	2008221	7	24	0.0221934355969735	10.4773402555577
2008221	7	2008222	7	24	2.59153896873718e-09	0.21495414173837
2008222	7	2008223	7	24	0.000739124494724471	1.21869546448963
2008223	7	2008224	7	24	0.00795818096997517	8.76338979725129
2008224	7	2008225	7	24	0.00925597148139332	5.26704673817015
2008225	7	2008226	7	24	0.0123360483461006	12.379934008867
2008226	7	2008227	7	24	0.113448896288407	11.7650244410857
2008227	7	2008228	7	24	0.00405188458953469	2.39312644792774
2008228	7	2008229	7	24	1.1095100201271e-05	0.125419079220457
2008229	7	2008230	7	24	0.00200136996108654	2.19879248404891
2008230	7	2008231	7	24	0.000835866878345541	5.35656590710674
2008231	7	2008232	7	24	0.000842543055578834	7.10352900678993
2008232	7	2008233	7	24	0.000576254083708545	0.613348710614778
2008233	7	2008234	7	24	0.0154417898900283	5.23874278901234
2008234	7	2008235	7	24	0.00291735358004064	2.06760102496914
2008235	7	2008236	7	24	5.24314729323154e-06	0.127310504808398
2008236	7	2008237	7	24	0	0
2008237	7	2008238	7	24	0	0
2008238	7	2008239	7	24	0.0134305811996268	2.21945208378886
2008239	7	2008240	7	24	0.000129653492936515	0.345606250454419
2008240	7	2008241	7	24	0.00287768378982373	4.21832148812219
2008241	7	2008242	7	24	0.000162094510378665	0.261468795943074
2008242	7	2008243	7	24	0	0
2008243	7	2008244	7	17	0	0
