# Supplementary material for: A comparison of sea salt emission parameterizations in northwestern Europe using a chemistry transport model setup
Source: Copernicus journal article supplement (doi:10.5194/acp-16-9905-2016), 2016-08-08
Supplement: Supplementary file 2 [file acp-16-9905-2016-supplement.zip › wetdep/wetdep.timeseries.values.NO0218R.sp13.moreStations.csv]

doy_start	hour_start	doy_end	hour_end	n_vals	Na in kg/ha/d	precip in mm/d
2008001	7	2008002	7	24	0	0
2008002	7	2008003	7	24	0	0
2008003	7	2008004	7	24	0	0
2008004	7	2008005	7	24	0	0
2008005	7	2008006	7	24	8.5220001348868e-14	0
2008006	7	2008007	7	24	0.00977593733799731	0.234738985840637
2008007	7	2008008	7	24	0.025242632660549	1.6803397862823
2008008	7	2008009	7	24	8.50895024693256e-06	0.209956058923445
2008009	7	2008010	7	24	0.0551627693248243	2.11248999528688
2008010	7	2008011	7	24	0.133286514635841	5.03827358621892
2008011	7	2008012	7	24	0.00442113992816303	0.154292103285688
2008012	7	2008013	7	24	0	0
2008013	7	2008014	7	24	0.105336134387493	1.4144205117191
2008014	7	2008015	7	24	0.104730979536089	1.52602087750252
2008015	7	2008016	7	24	0.203749311958472	9.31272206595168
2008016	7	2008017	7	24	0.250514747416737	15.6787513979361
2008017	7	2008018	7	24	0.00943089159313592	0.18029900214014
2008018	7	2008019	7	24	0.0941155905042933	7.35027398448437
2008019	7	2008020	7	24	0.00379575521878905	0.109916849469304
2008020	7	2008021	7	24	0.026838682866334	0.158837328489214
2008021	7	2008022	7	24	0	2.31581843545409e-12
2008022	7	2008023	7	24	0	2.75985900799469e-10
2008023	7	2008024	7	24	0.019725784159584	5.48287253281623
2008024	7	2008025	7	24	0.00672211088440153	0.0333020082369988
2008025	7	2008026	7	24	0.0132253911249805	0.204106545580659
2008026	7	2008027	7	24	0	3.82161265756162e-08
2008027	7	2008028	7	24	4.10696565526076e-07	0.00015822575953393
2008028	7	2008029	7	24	3.01085105982652e-12	5.96652898803549e-06
2008029	7	2008030	7	24	4.50994379921737e-05	0.0465860877595324
2008030	7	2008031	7	24	0	1.24999478998779e-14
2008031	7	2008032	7	24	0.0269472395114924	0.296112453567869
2008032	7	2008033	7	24	0.0238137773074413	0.271251216132719
2008033	7	2008034	7	24	0	0
2008034	7	2008035	7	24	0.000653573815925483	0.0134637939629398
2008035	7	2008036	7	24	2.61993311539648e-08	1.59375636576975e-07
2008036	7	2008037	7	24	0.0105697257498005	0.298267009828532
2008037	7	2008038	7	24	0.0130820933441828	2.19425405169095
2008038	7	2008039	7	24	0.00722901622717433	0.573031290915651
2008039	7	2008040	7	24	2.00355352097973e-07	0.000400013591065271
2008040	7	2008041	7	24	1.33887061453261e-05	0.164397180956963
2008041	7	2008042	7	24	0.00257845794544039	0.128650759537788
2008042	7	2008043	7	24	0.00198647247499234	0.0149235285221039
2008043	7	2008044	7	24	0.000433151939918379	0.00924976465943878
2008044	7	2008045	7	24	0	0
2008045	7	2008046	7	24	0	0
2008046	7	2008047	7	24	0	0
2008047	7	2008048	7	24	0	0
2008048	7	2008049	7	24	0.000464506992533984	0.0323480464458467
2008049	7	2008050	7	24	0	0.0154267801807934
2008050	7	2008051	7	24	0.00100022371726652	0.0919372742447363
2008051	7	2008052	7	24	0.000552649113392683	0.0857953546397847
2008052	7	2008053	7	24	0.00182518553376548	0.462045208041063
2008053	7	2008054	7	24	5.20945224347136e-05	0.413569772888407
2008054	7	2008055	7	24	0.00240456163792915	0.438060076098407
2008055	7	2008056	7	24	2.60871811620048e-13	1.79078909183115e-08
2008056	7	2008057	7	24	0	0.283574386276481
2008057	7	2008058	7	24	0.0880426066007506	9.24003726149488
2008058	7	2008059	7	24	0	0.155066292484615
2008059	7	2008060	7	24	0.000715056571716559	0.0984111070861458
2008060	7	2008061	7	17	0	1.38905081649187
2008182	7	2008183	7	7	0	0
2008183	7	2008184	7	24	0	0
2008184	7	2008185	7	24	0	0
2008185	7	2008186	7	24	0	0
2008186	7	2008187	7	24	1.39837100499562e-05	0.0386520964093506
2008187	7	2008188	7	24	0.00571029067421314	1.98018814336459
2008188	7	2008189	7	24	0.00619069164936263	26.9748587423237
2008189	7	2008190	7	24	0.000670331678790488	2.56759833800061
2008190	7	2008191	7	24	1.17237270579976e-12	3.65893984195402e-09
2008191	7	2008192	7	24	0	0.0315130535233266
2008192	7	2008193	7	24	0.0054487704540951	2.4008866302503
2008193	7	2008194	7	24	0.0101138774428525	3.66819471150863
2008194	7	2008195	7	24	0.0979956788197644	13.1532603983517
2008195	7	2008196	7	24	0.00617460130160287	0.627533773176804
2008196	7	2008197	7	24	6.08695298570572e-16	2.0783112114111e-09
2008197	7	2008198	7	24	0.00782695073527552	4.15538197899507
2008198	7	2008199	7	24	0	0.101171048163517
2008199	7	2008200	7	24	0.000707310398793197	0.371731971390545
2008200	7	2008201	7	24	1.82214244035103e-10	0.00204184493276494
2008201	7	2008202	7	24	0.000484092079932787	1.855948313475
2008202	7	2008203	7	24	0.00170788780182666	6.09491863298213
2008203	7	2008204	7	24	0.00130125290041178	2.66911352242575
2008204	7	2008205	7	24	0	1.48546490863141e-11
2008205	7	2008206	7	24	0	0
2008206	7	2008207	7	24	0	0
2008207	7	2008208	7	24	0	7.21285502436331e-07
2008208	7	2008209	7	24	0	0
2008209	7	2008210	7	24	0	0
2008210	7	2008211	7	24	0	0
2008211	7	2008212	7	24	0	0
2008212	7	2008213	7	24	0	0
2008213	7	2008214	7	24	0	0.000142139724630397
2008214	7	2008215	7	24	0	0
2008215	7	2008216	7	24	0.00238955176341642	11.7564881657097
2008216	7	2008217	7	24	0.00639876503439155	3.62967355833094
2008217	7	2008218	7	24	0.010440143183584	9.56505119568425
2008218	7	2008219	7	24	5.35995165659969e-05	0.0131107138583769
2008219	7	2008220	7	24	0.0119176524695894	8.72643820801997
2008220	7	2008221	7	24	0.031367309398993	10.4773402555577
2008221	7	2008222	7	24	6.72288395341218e-09	0.21495414173837
2008222	7	2008223	7	24	0.000918177408374279	1.21869546448963
2008223	7	2008224	7	24	0.0141538692436018	8.76338979725129
2008224	7	2008225	7	24	0.0173111543364485	5.26704673817015
2008225	7	2008226	7	24	0.0270590375625294	12.379934008867
2008226	7	2008227	7	24	0.256309810960899	11.7650244410857
2008227	7	2008228	7	24	0.00405980242782661	2.39312644792774
2008228	7	2008229	7	24	1.85165988376697e-05	0.125419079220457
2008229	7	2008230	7	24	0.00380482982513968	2.19879248404891
2008230	7	2008231	7	24	0.00193562902978556	5.35656590710674
2008231	7	2008232	7	24	0.00218207645004957	7.10352900678993
2008232	7	2008233	7	24	0.000860971353331617	0.613348710614778
2008233	7	2008234	7	24	0.0291961038982845	5.23874278901234
2008234	7	2008235	7	24	0.00304265094954235	2.06760102496914
2008235	7	2008236	7	24	6.46762332058926e-06	0.127310504808398
2008236	7	2008237	7	24	0	0
2008237	7	2008238	7	24	0	0
2008238	7	2008239	7	24	0.0213525149997728	2.21945208378886
2008239	7	2008240	7	24	0.00021075589344203	0.345606250454419
2008240	7	2008241	7	24	0.0039905828087579	4.21832148812219
2008241	7	2008242	7	24	0.000273461251636036	0.261468795943074
2008242	7	2008243	7	24	0	0
2008243	7	2008244	7	17	0	0
