# Supplementary material for: A comparison of sea salt emission parameterizations in northwestern Europe using a chemistry transport model setup
Source: Copernicus journal article supplement (doi:10.5194/acp-16-9905-2016), 2016-08-08
Supplement: Supplementary file 2 [file acp-16-9905-2016-supplement.zip › wetdep/wetdep.timeseries.values.NO0218R.zero.moreStations.csv]

doy_start	hour_start	doy_end	hour_end	n_vals	Na in kg/ha/d	precip in mm/d
2008001	7	2008002	7	24	0	0
2008002	7	2008003	7	24	0	0
2008003	7	2008004	7	24	0	0
2008004	7	2008005	7	24	0	0
2008005	7	2008006	7	24	1.04104305234925e-30	0
2008006	7	2008007	7	24	2.0437041045828e-19	0.234738985840637
2008007	7	2008008	7	24	5.09157960878199e-19	1.6803397862823
2008008	7	2008009	7	24	4.29342897276277e-22	0.209956058923445
2008009	7	2008010	7	24	2.8309596465346e-19	2.11248999528688
2008010	7	2008011	7	24	1.03971245989361e-18	5.03827358621892
2008011	7	2008012	7	24	1.40634016959739e-19	0.154292103285688
2008012	7	2008013	7	24	0	0
2008013	7	2008014	7	24	1.93698827635111e-19	1.4144205117191
2008014	7	2008015	7	24	5.06242798621127e-19	1.52602087750252
2008015	7	2008016	7	24	2.08391896050302e-18	9.31272206595168
2008016	7	2008017	7	24	1.6125317989625e-18	15.6787513979361
2008017	7	2008018	7	24	5.85825698939657e-20	0.18029900214014
2008018	7	2008019	7	24	9.96636004917616e-19	7.35027398448437
2008019	7	2008020	7	24	3.23004201974173e-20	0.109916849469304
2008020	7	2008021	7	24	4.02141153669086e-19	0.158837328489214
2008021	7	2008022	7	24	0	2.31581843545409e-12
2008022	7	2008023	7	24	0	2.75985900799469e-10
2008023	7	2008024	7	24	1.89504725471454e-19	5.48287253281623
2008024	7	2008025	7	24	8.13464516077136e-21	0.0333020082369988
2008025	7	2008026	7	24	1.19448573687273e-20	0.204106545580659
2008026	7	2008027	7	24	0	3.82161265756162e-08
2008027	7	2008028	7	24	3.08629773184447e-24	0.00015822575953393
2008028	7	2008029	7	24	4.32224389143995e-29	5.96652898803549e-06
2008029	7	2008030	7	24	5.63219414121475e-22	0.0465860877595324
2008030	7	2008031	7	24	0	1.24999478998779e-14
2008031	7	2008032	7	24	3.90478752338998e-19	0.296112453567869
2008032	7	2008033	7	24	1.15718942343884e-19	0.271251216132719
2008033	7	2008034	7	24	0	0
2008034	7	2008035	7	24	1.95203198713785e-21	0.0134637939629398
2008035	7	2008036	7	24	5.91811871205667e-25	1.59375636576975e-07
2008036	7	2008037	7	24	1.70116590702157e-19	0.298267009828532
2008037	7	2008038	7	24	2.19339472493146e-19	2.19425405169095
2008038	7	2008039	7	24	6.81461088721196e-20	0.573031290915651
2008039	7	2008040	7	24	1.22681974906685e-24	0.000400013591065271
2008040	7	2008041	7	24	1.49334802891583e-22	0.164397180956963
2008041	7	2008042	7	24	6.36458388274767e-20	0.128650759537788
2008042	7	2008043	7	24	2.52078808119983e-20	0.0149235285221039
2008043	7	2008044	7	24	7.18178594266406e-21	0.00924976465943878
2008044	7	2008045	7	24	0	0
2008045	7	2008046	7	24	0	0
2008046	7	2008047	7	24	0	0
2008047	7	2008048	7	24	0	0
2008048	7	2008049	7	24	1.2916692529828e-20	0.0323480464458467
2008049	7	2008050	7	24	0	0.0154267801807934
2008050	7	2008051	7	24	4.52879536337024e-22	0.0919372742447363
2008051	7	2008052	7	24	1.33205314606471e-21	0.0857953546397847
2008052	7	2008053	7	24	4.90766303987111e-22	0.462045208041063
2008053	7	2008054	7	24	3.49595831792806e-21	0.413569772888407
2008054	7	2008055	7	24	6.18995919525826e-21	0.438060076098407
2008055	7	2008056	7	24	1.60765120023719e-30	1.79078909183115e-08
2008056	7	2008057	7	24	0	0.283574386276481
2008057	7	2008058	7	24	4.9245356525502e-19	9.24003726149488
2008058	7	2008059	7	24	0	0.155066292484615
2008059	7	2008060	7	24	1.01941819026105e-20	0.0984111070861458
2008060	7	2008061	7	17	0	1.38905081649187
2008182	7	2008183	7	7	0	0
2008183	7	2008184	7	24	0	0
2008184	7	2008185	7	24	0	0
2008185	7	2008186	7	24	0	0
2008186	7	2008187	7	24	5.69763017294169e-20	0.0386520964093506
2008187	7	2008188	7	24	4.63171568696438e-18	1.98018814336459
2008188	7	2008189	7	24	5.66437262628477e-18	26.9748587423237
2008189	7	2008190	7	24	5.28858479876474e-19	2.56759833800061
2008190	7	2008191	7	24	5.76696006616865e-28	3.65893984195402e-09
2008191	7	2008192	7	24	0	0.0315130535233266
2008192	7	2008193	7	24	4.4108956501957e-18	2.4008866302503
2008193	7	2008194	7	24	4.52810905759832e-18	3.66819471150863
2008194	7	2008195	7	24	1.73383738175115e-17	13.1532603983517
2008195	7	2008196	7	24	5.72863837342075e-19	0.627533773176804
2008196	7	2008197	7	24	1.5470454063296e-31	2.0783112114111e-09
2008197	7	2008198	7	24	4.69906483344964e-18	4.15538197899507
2008198	7	2008199	7	24	0	0.101171048163517
2008199	7	2008200	7	24	4.68790698986525e-19	0.371731971390545
2008200	7	2008201	7	24	6.2185537154286e-26	0.00204184493276494
2008201	7	2008202	7	24	2.40211422074766e-18	1.855948313475
2008202	7	2008203	7	24	7.18407964596758e-18	6.09491863298213
2008203	7	2008204	7	24	3.37165198470311e-18	2.66911352242575
2008204	7	2008205	7	24	0	1.48546490863141e-11
2008205	7	2008206	7	24	0	0
2008206	7	2008207	7	24	0	0
2008207	7	2008208	7	24	0	7.21285502436331e-07
2008208	7	2008209	7	24	0	0
2008209	7	2008210	7	24	0	0
2008210	7	2008211	7	24	0	0
2008211	7	2008212	7	24	0	0
2008212	7	2008213	7	24	0	0
2008213	7	2008214	7	24	0	0.000142139724630397
2008214	7	2008215	7	24	0	0
2008215	7	2008216	7	24	6.11852733344513e-18	11.7564881657097
2008216	7	2008217	7	24	4.86466962981211e-18	3.62967355833094
2008217	7	2008218	7	24	7.55624392786477e-18	9.56505119568425
2008218	7	2008219	7	24	2.59195959106982e-20	0.0131107138583769
2008219	7	2008220	7	24	5.57686935345271e-18	8.72643820801997
2008220	7	2008221	7	24	4.18937795917312e-18	10.4773402555577
2008221	7	2008222	7	24	1.72059974857351e-22	0.21495414173837
2008222	7	2008223	7	24	2.4514803095665e-19	1.21869546448963
2008223	7	2008224	7	24	2.42615697566215e-18	8.76338979725129
2008224	7	2008225	7	24	6.3350018400464e-18	5.26704673817015
2008225	7	2008226	7	24	2.50552945018859e-18	12.379934008867
2008226	7	2008227	7	24	1.27962096558252e-17	11.7650244410857
2008227	7	2008228	7	24	3.06217973686061e-18	2.39312644792774
2008228	7	2008229	7	24	1.90231786899067e-20	0.125419079220457
2008229	7	2008230	7	24	2.68933975178382e-18	2.19879248404891
2008230	7	2008231	7	24	5.17459701731424e-19	5.35656590710674
2008231	7	2008232	7	24	9.20072252442503e-19	7.10352900678993
2008232	7	2008233	7	24	2.4439294928944e-19	0.613348710614778
2008233	7	2008234	7	24	6.53585751131424e-18	5.23874278901234
2008234	7	2008235	7	24	2.30295784570682e-18	2.06760102496914
2008235	7	2008236	7	24	9.28364988237946e-21	0.127310504808398
2008236	7	2008237	7	24	0	0
2008237	7	2008238	7	24	0	0
2008238	7	2008239	7	24	2.63806060468942e-18	2.21945208378886
2008239	7	2008240	7	24	3.67632283853968e-20	0.345606250454419
2008240	7	2008241	7	24	7.14796660925806e-19	4.21832148812219
2008241	7	2008242	7	24	2.24160457400012e-19	0.261468795943074
2008242	7	2008243	7	24	0	0
2008243	7	2008244	7	17	0	0
