# Supplementary material for: A comparison of sea salt emission parameterizations in northwestern Europe using a chemistry transport model setup
Source: Copernicus journal article supplement (doi:10.5194/acp-16-9905-2016), 2016-08-08
Supplement: Supplementary file 2 [file acp-16-9905-2016-supplement.zip › wetdep/wetdep.timeseries.values.PL0002R.ov14.moreStations.csv]

doy_start	hour_start	doy_end	hour_end	n_vals	Na in kg/ha/d	precip in mm/d
2008001	6	2008002	6	24	0	0
2008002	6	2008003	6	24	0	0
2008003	6	2008004	6	24	0	0
2008004	6	2008005	6	24	0	0
2008005	6	2008006	6	24	1.89448051076788e-13	2.92816478637999e-09
2008006	6	2008007	6	24	2.53754224124947e-05	1.7805205077949
2008007	6	2008008	6	24	1.55941835476593e-05	0.00551320740042367
2008008	6	2008009	6	24	0.000282313815937838	0.0698215045628103
2008009	6	2008010	6	24	0	0
2008010	6	2008011	6	24	1.5599551834878e-07	8.28120108509984e-05
2008011	6	2008012	6	24	0.000200307450837082	0.382525201915767
2008012	6	2008013	6	24	0.000102956335596971	0.419703941149514
2008013	6	2008014	6	24	4.49149776793451e-15	0.000187269541541647
2008014	6	2008015	6	24	0	0
2008015	6	2008016	6	24	0	5.26195264389986e-12
2008016	6	2008017	6	24	7.61050000166597e-05	0.0918314452638319
2008017	6	2008018	6	24	2.90876688205799e-05	1.09869855913843
2008018	6	2008019	6	24	0.000536043660746308	2.14129969402151
2008019	6	2008020	6	24	0.00792825986986895	6.70745035006239
2008020	6	2008021	6	24	1.44434618240535e-05	0.0456898521617607
2008021	6	2008022	6	24	0.000743728370858818	18.9300207793713
2008022	6	2008023	6	24	0.000110946369355447	5.85064516495234
2008023	6	2008024	6	24	0	0
2008024	6	2008025	6	24	0.00437532133964332	4.10736984108628
2008025	6	2008026	6	24	0.0113413288229403	0.627065366501238
2008026	6	2008027	6	24	0.0176282019744212	5.47013021914609
2008027	6	2008028	6	24	0.0187681170061114	2.63975202396978
2008028	6	2008029	6	24	0	0
2008029	6	2008030	6	24	0.00291015066318571	0.878555237184133
2008030	6	2008031	6	24	0.000504023484500572	0.493218402109808
2008031	6	2008032	6	24	2.15005969282345e-05	0.0329010758287041
2008032	6	2008033	6	24	9.87862305817089e-05	0.324766046508378
2008033	6	2008034	6	24	1.57930777985982e-06	0.339075278038337
2008034	6	2008035	6	24	0	0
2008035	6	2008036	6	24	0.000112190481862168	1.8009811287132
2008036	6	2008037	6	24	5.21058990836032e-05	0.17189293877489
2008037	6	2008038	6	24	0.0022767608813191	5.22653688381671
2008038	6	2008039	6	24	0.000376085210028031	0.286483882856022
2008039	6	2008040	6	24	0.00159699557083741	1.04503889990156
2008040	6	2008041	6	24	0.000384864967428533	0.327585198599943
2008041	6	2008042	6	24	0	0
2008042	6	2008043	6	24	0	0
2008043	6	2008044	6	24	1.94874530328026e-05	0.00767197206809463
2008044	6	2008045	6	24	0.000248768059485333	0.222850964121941
2008045	6	2008046	6	24	0	7.95213409010564e-10
2008046	6	2008047	6	24	0	0
2008047	6	2008048	6	24	0	0
2008048	6	2008049	6	24	0	0
2008049	6	2008050	6	24	4.95364925379416e-07	0.00100570231605979
2008050	6	2008051	6	24	0.000114283127756099	0.0255325803943784
2008051	6	2008052	6	24	2.14887988380497e-05	0.0576359312291893
2008052	6	2008053	6	24	0.000655341285857389	1.29299834959966
2008053	6	2008054	6	24	0.00684546577370949	4.80124723826186
2008054	6	2008055	6	24	0.00723774838337414	0.976694301382134
2008055	6	2008056	6	24	0.00130257033583433	1.16952921070015
2008056	6	2008057	6	24	0.000267764695562239	0.677846745541349
2008057	6	2008058	6	24	0.000168922335999596	1.60415068156393
2008058	6	2008059	6	24	0.00132103671050572	3.32502115372336
2008059	6	2008060	6	24	0.00247938431761919	1.40177893072855
2008060	6	2008061	6	18	0	0.0562062690347789
2008182	6	2008183	6	6	0	0
2008183	6	2008184	6	24	0	0
2008184	6	2008185	6	24	0	0
2008185	6	2008186	6	24	0	0
2008186	6	2008187	6	24	0	0.0602871878072619
2008187	6	2008188	6	24	3.37341071497122e-05	0.902360125910491
2008188	6	2008189	6	24	0	0
2008189	6	2008190	6	24	0.000798307747746972	12.3573366865503
2008190	6	2008191	6	24	0.000654088448027324	1.06556550375579
2008191	6	2008192	6	24	0.00113768318656184	5.18807274039899
2008192	6	2008193	6	24	0.000840669780018288	3.0204165397253
2008193	6	2008194	6	24	0	0
2008194	6	2008195	6	24	0	0
2008195	6	2008196	6	24	0	4.54042904607377e-06
2008196	6	2008197	6	24	0.000911831998450907	3.56352368130545
2008197	6	2008198	6	24	0	7.34111016420513e-08
2008198	6	2008199	6	24	0	0.0258345305337571
2008199	6	2008200	6	24	0	0.000262498954130719
2008200	6	2008201	6	24	3.71682272063362e-05	1.35487596369321
2008201	6	2008202	6	24	0	0.0553479039700733
2008202	6	2008203	6	24	0.000605645478134731	2.14700982751202
2008203	6	2008204	6	24	7.15632272800804e-05	2.44450536406604
2008204	6	2008205	6	24	0	0
2008205	6	2008206	6	24	1.32875859731634e-05	0.339403900020737
2008206	6	2008207	6	24	1.73194054059422e-05	0.256136670268461
2008207	6	2008208	6	24	0	0.00576337741222233
2008208	6	2008209	6	24	0	0
2008209	6	2008210	6	24	0	0
2008210	6	2008211	6	24	0	0
2008211	6	2008212	6	24	0	0
2008212	6	2008213	6	24	0	0
2008213	6	2008214	6	24	0	0
2008214	6	2008215	6	24	0	0
2008215	6	2008216	6	24	0	0
2008216	6	2008217	6	24	0	0
2008217	6	2008218	6	24	7.9044895759308e-05	0.70867134845845
2008218	6	2008219	6	24	0	0.0030958705519879
2008219	6	2008220	6	24	0	0
2008220	6	2008221	6	24	0	0
2008221	6	2008222	6	24	9.48362343453255e-05	2.46170774603014
2008222	6	2008223	6	24	0	6.27914483553599e-07
2008223	6	2008224	6	24	0	0
2008224	6	2008225	6	24	0	0
2008225	6	2008226	6	24	0	0
2008226	6	2008227	6	24	0	0
2008227	6	2008228	6	24	0	0
2008228	6	2008229	6	24	0	0.00470301423774799
2008229	6	2008230	6	24	0	0
2008230	6	2008231	6	24	0	0
2008231	6	2008232	6	24	0	0
2008232	6	2008233	6	24	0	0
2008233	6	2008234	6	24	0	0
2008234	6	2008235	6	24	0	0
2008235	6	2008236	6	24	0	0
2008236	6	2008237	6	24	0.000791455480562562	0.987964072261124
2008237	6	2008238	6	24	0.00117097334954988	3.19185192294761
2008238	6	2008239	6	24	1.11940308380671e-06	0.000780425404403263
2008239	6	2008240	6	24	0	2.22955250046624e-13
2008240	6	2008241	6	24	4.89837764199601e-13	5.58148572932932e-10
2008241	6	2008242	6	24	0.000289493991046191	0.0282727400340953
2008242	6	2008243	6	24	0.0015779101861809	1.48275544649014
2008243	6	2008244	6	18	0	0
