# Supplementary material for: A comparison of sea salt emission parameterizations in northwestern Europe using a chemistry transport model setup
Source: Copernicus journal article supplement (doi:10.5194/acp-16-9905-2016), 2016-08-08
Supplement: Supplementary file 2 [file acp-16-9905-2016-supplement.zip › wetdep/wetdep.timeseries.values.PL0002R.zero.moreStations.csv]

doy_start	hour_start	doy_end	hour_end	n_vals	Na in kg/ha/d	precip in mm/d
2008001	6	2008002	6	24	0	0
2008002	6	2008003	6	24	0	0
2008003	6	2008004	6	24	0	0
2008004	6	2008005	6	24	0	0
2008005	6	2008006	6	24	6.88538700172016e-29	2.92816478637999e-09
2008006	6	2008007	6	24	2.40693314513847e-20	1.7805205077949
2008007	6	2008008	6	24	8.61642879288546e-21	0.00551320740042367
2008008	6	2008009	6	24	5.96549844376636e-20	0.0698215045628103
2008009	6	2008010	6	24	0	0
2008010	6	2008011	6	24	4.15190256474639e-23	8.28120108509984e-05
2008011	6	2008012	6	24	4.41232220256353e-19	0.382525201915767
2008012	6	2008013	6	24	2.29790002909619e-19	0.419703941149514
2008013	6	2008014	6	24	7.63021689679782e-31	0.000187269541541647
2008014	6	2008015	6	24	0	0
2008015	6	2008016	6	24	0	5.26195264389986e-12
2008016	6	2008017	6	24	7.71986860631636e-20	0.0918314452638319
2008017	6	2008018	6	24	6.92862296662715e-20	1.09869855913843
2008018	6	2008019	6	24	3.61894954638539e-19	2.14129969402151
2008019	6	2008020	6	24	1.33068774375481e-18	6.70745035006239
2008020	6	2008021	6	24	9.31065520546836e-21	0.0456898521617607
2008021	6	2008022	6	24	3.07872185818817e-19	18.9300207793713
2008022	6	2008023	6	24	3.73743123343928e-20	5.85064516495234
2008023	6	2008024	6	24	0	0
2008024	6	2008025	6	24	5.2877984489517e-19	4.10736984108628
2008025	6	2008026	6	24	1.17011811182028e-19	0.627065366501238
2008026	6	2008027	6	24	2.04415699770644e-18	5.47013021914609
2008027	6	2008028	6	24	1.06450652440381e-17	2.63975202396978
2008028	6	2008029	6	24	0	0
2008029	6	2008030	6	24	1.71738656134257e-19	0.878555237184133
2008030	6	2008031	6	24	2.50457748356272e-20	0.493218402109808
2008031	6	2008032	6	24	1.80058624604371e-21	0.0329010758287041
2008032	6	2008033	6	24	8.34748595363333e-21	0.324766046508378
2008033	6	2008034	6	24	2.6212840271714e-22	0.339075278038337
2008034	6	2008035	6	24	0	0
2008035	6	2008036	6	24	3.39371914964664e-19	1.8009811287132
2008036	6	2008037	6	24	3.38692901105498e-20	0.17189293877489
2008037	6	2008038	6	24	4.82066598299014e-19	5.22653688381671
2008038	6	2008039	6	24	3.18683168576403e-20	0.286483882856022
2008039	6	2008040	6	24	4.37103532516294e-19	1.04503889990156
2008040	6	2008041	6	24	9.53935912283416e-20	0.327585198599943
2008041	6	2008042	6	24	0	0
2008042	6	2008043	6	24	0	0
2008043	6	2008044	6	24	3.09303567981892e-21	0.00767197206809463
2008044	6	2008045	6	24	4.3503430242638e-20	0.222850964121941
2008045	6	2008046	6	24	0	7.95213409010564e-10
2008046	6	2008047	6	24	0	0
2008047	6	2008048	6	24	0	0
2008048	6	2008049	6	24	0	0
2008049	6	2008050	6	24	3.84323508853805e-24	0.00100570231605979
2008050	6	2008051	6	24	7.7830233071579e-22	0.0255325803943784
2008051	6	2008052	6	24	8.79007913292026e-22	0.0576359312291893
2008052	6	2008053	6	24	1.45069205374613e-19	1.29299834959966
2008053	6	2008054	6	24	5.23652995146156e-19	4.80124723826186
2008054	6	2008055	6	24	9.08562253441141e-19	0.976694301382134
2008055	6	2008056	6	24	4.21021971492647e-20	1.16952921070015
2008056	6	2008057	6	24	1.28931641868332e-19	0.677846745541349
2008057	6	2008058	6	24	2.08387847389216e-19	1.60415068156393
2008058	6	2008059	6	24	3.33300359442839e-19	3.32502115372336
2008059	6	2008060	6	24	5.18948237384461e-19	1.40177893072855
2008060	6	2008061	6	18	0	0.0562062690347789
2008182	6	2008183	6	6	0	0
2008183	6	2008184	6	24	0	0
2008184	6	2008185	6	24	0	0
2008185	6	2008186	6	24	0	0
2008186	6	2008187	6	24	0	0.0602871878072619
2008187	6	2008188	6	24	1.4052155844674e-18	0.902360125910491
2008188	6	2008189	6	24	0	0
2008189	6	2008190	6	24	4.32978437210502e-18	12.3573366865503
2008190	6	2008191	6	24	1.07281066295154e-18	1.06556550375579
2008191	6	2008192	6	24	7.91702283863253e-18	5.18807274039899
2008192	6	2008193	6	24	3.4833191689068e-18	3.0204165397253
2008193	6	2008194	6	24	0	0
2008194	6	2008195	6	24	0	0
2008195	6	2008196	6	24	0	4.54042904607377e-06
2008196	6	2008197	6	24	6.63888353024293e-18	3.56352368130545
2008197	6	2008198	6	24	0	7.34111016420513e-08
2008198	6	2008199	6	24	0	0.0258345305337571
2008199	6	2008200	6	24	0	0.000262498954130719
2008200	6	2008201	6	24	7.29124885208604e-19	1.35487596369321
2008201	6	2008202	6	24	0	0.0553479039700733
2008202	6	2008203	6	24	9.38515176556924e-19	2.14700982751202
2008203	6	2008204	6	24	2.40089484464508e-19	2.44450536406604
2008204	6	2008205	6	24	0	0
2008205	6	2008206	6	24	1.10676274743277e-19	0.339403900020737
2008206	6	2008207	6	24	2.33610170268782e-19	0.256136670268461
2008207	6	2008208	6	24	0	0.00576337741222233
2008208	6	2008209	6	24	0	0
2008209	6	2008210	6	24	0	0
2008210	6	2008211	6	24	0	0
2008211	6	2008212	6	24	0	0
2008212	6	2008213	6	24	0	0
2008213	6	2008214	6	24	0	0
2008214	6	2008215	6	24	0	0
2008215	6	2008216	6	24	0	0
2008216	6	2008217	6	24	0	0
2008217	6	2008218	6	24	6.36175918315977e-19	0.70867134845845
2008218	6	2008219	6	24	0	0.0030958705519879
2008219	6	2008220	6	24	0	0
2008220	6	2008221	6	24	0	0
2008221	6	2008222	6	24	2.62289100202734e-18	2.46170774603014
2008222	6	2008223	6	24	0	6.27914483553599e-07
2008223	6	2008224	6	24	0	0
2008224	6	2008225	6	24	0	0
2008225	6	2008226	6	24	0	0
2008226	6	2008227	6	24	0	0
2008227	6	2008228	6	24	0	0
2008228	6	2008229	6	24	0	0.00470301423774799
2008229	6	2008230	6	24	0	0
2008230	6	2008231	6	24	0	0
2008231	6	2008232	6	24	0	0
2008232	6	2008233	6	24	0	0
2008233	6	2008234	6	24	0	0
2008234	6	2008235	6	24	0	0
2008235	6	2008236	6	24	0	0
2008236	6	2008237	6	24	2.02964721622916e-18	0.987964072261124
2008237	6	2008238	6	24	2.09898913081172e-18	3.19185192294761
2008238	6	2008239	6	24	2.68287514366945e-21	0.000780425404403263
2008239	6	2008240	6	24	0	2.22955250046624e-13
2008240	6	2008241	6	24	1.0086521507759e-27	5.58148572932932e-10
2008241	6	2008242	6	24	7.42830784229321e-20	0.0282727400340953
2008242	6	2008243	6	24	1.54221678173281e-18	1.48275544649014
2008243	6	2008244	6	18	0	0
