# Supplementary material for: A comparison of sea salt emission parameterizations in northwestern Europe using a chemistry transport model setup
Source: Copernicus journal article supplement (doi:10.5194/acp-16-9905-2016), 2016-08-08
Supplement: Supplementary file 2 [file acp-16-9905-2016-supplement.zip › wetdep/wetdep.timeseries.values.PL0004R.sp13.moreStations.csv]

doy_start	hour_start	doy_end	hour_end	n_vals	Na in kg/ha/d	precip in mm/d
2008001	6	2008002	6	24	8.79285394649331e-05	0.191937193004796
2008002	6	2008003	6	24	0	0
2008003	6	2008004	6	24	0	0
2008004	6	2008005	6	24	0	0
2008005	6	2008006	6	24	0	8.38455368808166e-06
2008006	6	2008007	6	24	0.00221506107542792	0.278308075504265
2008007	6	2008008	6	24	0.00652923530842606	0.842583213960202
2008008	6	2008009	6	24	0.0937117795068979	3.39495730290547
2008009	6	2008010	6	24	0.00230398763092065	0.987329717493414
2008010	6	2008011	6	24	9.27136590761136e-08	0.00332009406324154
2008011	6	2008012	6	24	6.37391479585858e-06	0.298310468425776
2008012	6	2008013	6	24	0.0142903159005501	0.426733099372786
2008013	6	2008014	6	24	0.00318865853227354	0.180831133604175
2008014	6	2008015	6	24	0	1.20538080557105e-06
2008015	6	2008016	6	24	4.74075421691874e-15	0.00250954700593247
2008016	6	2008017	6	24	4.15249517118628e-05	0.02064242187363
2008017	6	2008018	6	24	1.69063761416055e-05	0.100052134704593
2008018	6	2008019	6	24	0.00530176385927328	4.57097393454709
2008019	6	2008020	6	24	0.0635385405290317	2.91338297976579
2008020	6	2008021	6	24	0	0.564658675598799
2008021	6	2008022	6	24	0.080153138100811	2.27860280158302
2008022	6	2008023	6	24	3.97268880958383e-16	2.4891334128005e-13
2008023	6	2008024	6	24	0.00391627017044812	3.44675507025515
2008024	6	2008025	6	24	3.19121125893307e-06	0.103224055717026
2008025	6	2008026	6	24	0.319741200838559	0.638794414534024
2008026	6	2008027	6	24	0.598895579645317	12.7512159938447
2008027	6	2008028	6	24	0.0164875919278711	0.473087906028659
2008028	6	2008029	6	24	0.0259463453971148	0.848554075933066
2008029	6	2008030	6	24	0.0260738832463909	0.569259194931741
2008030	6	2008031	6	24	0.00134073224500594	2.64765852429634
2008031	6	2008032	6	24	0.00133511365827871	0.422204311586087
2008032	6	2008033	6	24	0.0335114583309422	1.12543054456719
2008033	6	2008034	6	24	0.0999065373471036	0.782579539951697
2008034	6	2008035	6	24	0	4.27637161792838e-10
2008035	6	2008036	6	24	0.000696130641576094	0.1414668608234
2008036	6	2008037	6	24	0.00126384118276317	1.17263867509002
2008037	6	2008038	6	24	0.109826045217214	5.402092684526
2008038	6	2008039	6	24	0.0116039210066947	0.496717592759524
2008039	6	2008040	6	24	0.0884358711733569	3.96458476281168
2008040	6	2008041	6	24	0.0156427699410415	0.717893508984424
2008041	6	2008042	6	24	0	1.98946892512459
2008042	6	2008043	6	24	0.0257375036956045	1.47809409278157
2008043	6	2008044	6	24	0.00221654891560646	0.419686092367328
2008044	6	2008045	6	24	0.00880019688922739	0.667326453549677
2008045	6	2008046	6	24	0	0
2008046	6	2008047	6	24	0	0
2008047	6	2008048	6	24	0	0
2008048	6	2008049	6	24	0.0597494832095472	0.83412893631865
2008049	6	2008050	6	24	7.25089507612498e-06	0.012455776465451
2008050	6	2008051	6	24	8.8835777613896e-05	0.0799341465215541
2008051	6	2008052	6	24	0.0145443770699732	0.771619759087401
2008052	6	2008053	6	24	0.186301050430977	3.92787077728372
2008053	6	2008054	6	24	0.0932347943925178	4.3677145890979
2008054	6	2008055	6	24	0.0349983803650679	2.88721200332382
2008055	6	2008056	6	24	0.00889117310547787	1.44201551802932
2008056	6	2008057	6	24	2.67892285046401e-05	1.34854693002207
2008057	6	2008058	6	24	0.0139202912492919	6.32079835538928
2008058	6	2008059	6	24	0.467783989639433	1.03887294071458
2008059	6	2008060	6	24	0	0.0220122717382575
2008060	6	2008061	6	18	0.0478780997556896	10.0361150214914
2008182	6	2008183	6	6	0	0
2008183	6	2008184	6	24	0	0
2008184	6	2008185	6	24	0	0
2008185	6	2008186	6	24	0	0
2008186	6	2008187	6	24	0	2.98326195163047e-16
2008187	6	2008188	6	24	0.00414710904206004	1.16301805741386
2008188	6	2008189	6	24	0.000676111861656285	0.552163267357653
2008189	6	2008190	6	24	0.000432836555410177	0.304243487021675
2008190	6	2008191	6	24	0.00182110246816592	1.03765204993219
2008191	6	2008192	6	24	1.07752116565754e-05	0.296936417711644
2008192	6	2008193	6	24	0.00155059110057296	2.01769904634992
2008193	6	2008194	6	24	0.00157075476778118	5.22292512995606
2008194	6	2008195	6	24	3.88826153403538e-12	0.0340378578972184
2008195	6	2008196	6	24	0	0.446466015996741
2008196	6	2008197	6	24	0	0
2008197	6	2008198	6	24	0	0
2008198	6	2008199	6	24	0.0272524949225772	2.97001826276012
2008199	6	2008200	6	24	0.0014875887854536	0.542644768116116
2008200	6	2008201	6	24	0.00151709466972875	2.85693059327559
2008201	6	2008202	6	24	0.00287688938507927	4.94592273108607
2008202	6	2008203	6	24	0.0052475688871041	0.798661366844012
2008203	6	2008204	6	24	0	0.106937854149357
2008204	6	2008205	6	24	0	0
2008205	6	2008206	6	24	0	0
2008206	6	2008207	6	24	0	0
2008207	6	2008208	6	24	0	0
2008208	6	2008209	6	24	0	0
2008209	6	2008210	6	24	0	0
2008210	6	2008211	6	24	0	0
2008211	6	2008212	6	24	0	0
2008212	6	2008213	6	24	0	0
2008213	6	2008214	6	24	0	0
2008214	6	2008215	6	24	0	0
2008215	6	2008216	6	24	0.00606381336520371	3.20346520542666
2008216	6	2008217	6	24	0.00138997889426491	0.512024201230639
2008217	6	2008218	6	24	0.0813825811855713	26.1354801903801
2008218	6	2008219	6	24	0.0543607667907627	7.06531275212131
2008219	6	2008220	6	24	0	0
2008220	6	2008221	6	24	8.83392707328312e-05	0
2008221	6	2008222	6	24	0.00114906024781174	4.17767252157515
2008222	6	2008223	6	24	0.0217597180208868	0.829257249368335
2008223	6	2008224	6	24	0.00353508747452863	0.595237973442474
2008224	6	2008225	6	24	0.00107286355158999	0.458918338232239
2008225	6	2008226	6	24	0.00320730984896727	7.62911021114176
2008226	6	2008227	6	24	4.89221781586279e-07	0.599729635673052
2008227	6	2008228	6	24	0	0
2008228	6	2008229	6	24	0.0263121739491143	6.08189200492542
2008229	6	2008230	6	24	0.100551641016754	19.2030660206318
2008230	6	2008231	6	24	0.00494041950890899	3.13323321534808
2008231	6	2008232	6	24	7.0720248863447e-06	0.0004742519918155
2008232	6	2008233	6	24	0.00298668161136447	1.42242084970468
2008233	6	2008234	6	24	0.00174420328359702	1.85138474645651
2008234	6	2008235	6	24	0.00491010181547608	1.16183352831285
2008235	6	2008236	6	24	0	0.0127278773988141
2008236	6	2008237	6	24	0.00194439189253842	5.86148679093993
2008237	6	2008238	6	24	0.00519788128382061	0.942551705523479
2008238	6	2008239	6	24	7.15648172920078e-08	0.211281171996348
2008239	6	2008240	6	24	0.00283473527476725	0.574208804630075
2008240	6	2008241	6	24	0.0032793420344691	0.645973212424358
2008241	6	2008242	6	24	0.0329178131695265	9.17583483763923
2008242	6	2008243	6	24	0	0.285996060101752
2008243	6	2008244	6	18	0	0
