# Supplementary material for: A comparison of sea salt emission parameterizations in northwestern Europe using a chemistry transport model setup
Source: Copernicus journal article supplement (doi:10.5194/acp-16-9905-2016), 2016-08-08
Supplement: Supplementary file 2 [file acp-16-9905-2016-supplement.zip › wetdep/wetdep.timeseries.values.PL0005R.sp13.moreStations.csv]

doy_start	hour_start	doy_end	hour_end	n_vals	Na in kg/ha/d	precip in mm/d
2007365	6	2008001	6	6	0	0
2008001	6	2008002	6	24	0	0
2008002	6	2008003	6	24	0	0
2008003	6	2008004	6	24	0	0
2008004	6	2008005	6	24	0	0
2008005	6	2008006	6	24	0	0
2008006	6	2008007	6	24	0	0
2008007	6	2008008	6	24	0	0
2008008	6	2008009	6	24	1.47572202485083e-05	0.00160271377439228
2008009	6	2008010	6	24	0.000365412696446583	0.0909177852057662
2008010	6	2008011	6	24	1.30419430442143e-06	0.00742768706026588
2008011	6	2008012	6	24	4.0399598116431e-10	5.17938500175223e-06
2008012	6	2008013	6	24	3.07470757926817e-06	0.000818635442827033
2008013	6	2008014	6	24	0.000381528029721172	0.0179053087641629
2008014	6	2008015	6	24	7.9787036798685e-12	2.12466349824526e-09
2008015	6	2008016	6	24	1.18530240831218e-15	6.15906544854302e-12
2008016	6	2008017	6	24	0.000206417402702249	0.0355285520569975
2008017	6	2008018	6	24	0.00328676827438782	1.92502392527987
2008018	6	2008019	6	24	0.00569623665222545	1.02637794590602
2008019	6	2008020	6	24	0.0383492433269772	9.21345294363123
2008020	6	2008021	6	24	2.17501408608138e-05	0.000142316639001269
2008021	6	2008022	6	24	3.43362137318541e-05	0.00778595501218157
2008022	6	2008023	6	24	0.0105569854821078	0.29698066667278
2008023	6	2008024	6	24	0	0
2008024	6	2008025	6	24	0.0146961606977486	2.20180386440622
2008025	6	2008026	6	24	0.659701757438665	4.18527688643735
2008026	6	2008027	6	24	0.198765132549658	10.5880554549952
2008027	6	2008028	6	24	0.0270427848037798	0.551970112937852
2008028	6	2008029	6	24	0.00344165561527916	0.0824953746602815
2008029	6	2008030	6	24	0.0192623119562651	0.629213883160959
2008030	6	2008031	6	24	5.27332282568364e-08	0.0161575313104447
2008031	6	2008032	6	24	1.11264087924835e-08	1.35595591422817e-05
2008032	6	2008033	6	24	0.000184457377374248	0.29187246981326
2008033	6	2008034	6	24	0.0220165136928382	0.154402870902932
2008034	6	2008035	6	24	0	0
2008035	6	2008036	6	24	1.12542881787398e-05	0.0431424915228683
2008036	6	2008037	6	24	0.000556351253276441	0.227627911212264
2008037	6	2008038	6	24	0.0222951356097102	2.43239933687015
2008038	6	2008039	6	24	0.00541807497115086	0.45956919234067
2008039	6	2008040	6	24	0.000399291621516368	0.197664785224543
2008040	6	2008041	6	24	0.0179468862256522	1.03995191780314
2008041	6	2008042	6	24	0.0102385905318215	1.80564909329405
2008042	6	2008043	6	24	0.000686101946889721	2.34999750473435
2008043	6	2008044	6	24	0.00411184223297468	0.391092503383759
2008044	6	2008045	6	24	0.00306488245307684	1.03026206454131
2008045	6	2008046	6	24	0	0
2008046	6	2008047	6	24	0	0
2008047	6	2008048	6	24	0	0
2008048	6	2008049	6	24	3.12405313843894e-05	3.8762020318964e-05
2008049	6	2008050	6	24	0.00186613432027984	0.112840044395635
2008050	6	2008051	6	24	0	6.76062469895378e-10
2008051	6	2008052	6	24	0.00017142106875184	0.100231093737038
2008052	6	2008053	6	24	0.0537140269357224	3.20679760371551
2008053	6	2008054	6	24	0.193947850769489	7.35137053699873
2008054	6	2008055	6	24	0.111747009045217	1.37915997859594
2008055	6	2008056	6	24	0.00638497699260172	1.68820096989727
2008056	6	2008057	6	24	0.00170170062432589	3.7409396725723
2008057	6	2008058	6	24	0.0085238388056368	9.96828701201052
2008058	6	2008059	6	24	0.0675439188466407	3.31379249546444
2008059	6	2008060	6	24	0.000898936212980713	0.04477055032572
2008060	6	2008061	6	18	0.00685837714675619	10.2185680902039
2008182	6	2008183	6	6	0	0
2008183	6	2008184	6	24	0	0
2008184	6	2008185	6	24	0	0
2008185	6	2008186	6	24	0	0
2008186	6	2008187	6	24	0	0.0578231884537672
2008187	6	2008188	6	24	0	0.0786771971615963
2008188	6	2008189	6	24	0	0
2008189	6	2008190	6	24	0.00151274688156056	2.20521865126863
2008190	6	2008191	6	24	0.0108154550320123	5.71808852620844
2008191	6	2008192	6	24	0.00329095321581999	3.92449850121518
2008192	6	2008193	6	24	0	0
2008193	6	2008194	6	24	0	5.52896025827581e-10
2008194	6	2008195	6	24	0.000335920577672368	1.25989161324671
2008195	6	2008196	6	24	0.000334116166308363	1.66585127076627
2008196	6	2008197	6	24	0.000711860443432085	2.76418514278803
2008197	6	2008198	6	24	0	0
2008198	6	2008199	6	24	0.000860249941324588	2.29603773856104
2008199	6	2008200	6	24	1.06657829178342e-06	0.0602418615209155
2008200	6	2008201	6	24	1.20928433901213e-06	0.126253107568278
2008201	6	2008202	6	24	0.000166039170623087	0.180992789795547
2008202	6	2008203	6	24	0.00238249981664442	2.2543922904848
2008203	6	2008204	6	24	2.23616525673931e-06	0.0396725271962153
2008204	6	2008205	6	24	0	0
2008205	6	2008206	6	24	0	0
2008206	6	2008207	6	24	0	0
2008207	6	2008208	6	24	0	0
2008208	6	2008209	6	24	0	0
2008209	6	2008210	6	24	0	0
2008210	6	2008211	6	24	2.63029006825066e-09	6.92059132178808e-06
2008211	6	2008212	6	24	2.12617484013516e-12	7.72696790144028e-07
2008212	6	2008213	6	24	0	0
2008213	6	2008214	6	24	0	0
2008214	6	2008215	6	24	0	0
2008215	6	2008216	6	24	3.76555696462652e-06	0.137107387693978
2008216	6	2008217	6	24	0.000193933852509898	0.0443330777642575
2008217	6	2008218	6	24	0.000896676659563208	1.68656036618096
2008218	6	2008219	6	24	0.00794191285606478	5.22115480880215
2008219	6	2008220	6	24	5.2787304865784e-12	1.33587437067817e-05
2008220	6	2008221	6	24	0	0
2008221	6	2008222	6	24	2.76204923942767e-05	0.196777285724637
2008222	6	2008223	6	24	0	0
2008223	6	2008224	6	24	0.000810346614129003	0.0507035767066897
2008224	6	2008225	6	24	1.81081848502629e-05	0.059759981883758
2008225	6	2008226	6	24	0	0
2008226	6	2008227	6	24	0	3.02392329926127e-09
2008227	6	2008228	6	24	0	0
2008228	6	2008229	6	24	0.000604423730234844	0.619257601534142
2008229	6	2008230	6	24	0.000221793718374101	0.552308204273247
2008230	6	2008231	6	24	0	0.0169341325818095
2008231	6	2008232	6	24	0	0
2008232	6	2008233	6	24	0	0
2008233	6	2008234	6	24	0	0
2008234	6	2008235	6	24	0.000620064155082218	0.376470854971558
2008235	6	2008236	6	24	0	0
2008236	6	2008237	6	24	0.000277789876607081	0.0740191405070962
2008237	6	2008238	6	24	0.0039318089515865	4.11267558995826
2008238	6	2008239	6	24	2.298735443532e-11	3.34504155323041e-08
2008239	6	2008240	6	24	0	0.168037676168688
2008240	6	2008241	6	24	0.000933431192103511	0.138604026915521
2008241	6	2008242	6	24	0.00828047890006675	15.9376575249597
2008242	6	2008243	6	24	0.00700282675679205	2.94735988718207
2008243	6	2008244	6	18	0	0.103576876329801
