# Supplementary material for: A comparison of sea salt emission parameterizations in northwestern Europe using a chemistry transport model setup
Source: Copernicus journal article supplement (doi:10.5194/acp-16-9905-2016), 2016-08-08
Supplement: Supplementary file 2 [file acp-16-9905-2016-supplement.zip › wetdep/wetdep.timeseries.values.SE0014R.sp13.moreStations.csv]

doy_start	hour_start	doy_end	hour_end	n_vals	Na in kg/ha/d	precip in mm/d
2008001	6	2008002	6	24	0.000151183464177898	0.131563638113135
2008002	6	2008003	6	24	3.70397961163126e-12	0.00262306734416502
2008003	6	2008004	6	24	0	0
2008004	6	2008005	6	24	0	0
2008005	6	2008006	6	24	0.0600332884665113	1.98726239824182
2008006	6	2008007	6	24	0.183721445390683	3.78898474854585
2008007	6	2008008	6	24	0.0134671143695829	2.8003983166127
2008008	6	2008009	6	24	0.134078852184832	7.77062909202047
2008009	6	2008010	6	24	0.106212711754416	3.09702211819401
2008010	6	2008011	6	24	0.384236653683756	6.70931782847062
2008011	6	2008012	6	24	0.0104223218370965	4.72270323822515
2008012	6	2008013	6	24	0.00934500083225601	1.54169484192737
2008013	6	2008014	6	24	0.000272885959125233	0.381687715019116
2008014	6	2008015	6	24	0.201407021458193	1.23303623564766
2008015	6	2008016	6	24	0.268885895658451	14.1052793966082
2008016	6	2008017	6	24	0.0696895913702738	1.14390074987284
2008017	6	2008018	6	24	0.0383796415253346	5.43326985109847
2008018	6	2008019	6	24	0.176998565908673	7.56533277053677
2008019	6	2008020	6	24	0.353224342411304	1.57770066765941
2008020	6	2008021	6	24	6.31559618656186e-05	1.20335080956844
2008021	6	2008022	6	24	0	0.000172517057016381
2008022	6	2008023	6	24	0	3.57032698758889e-11
2008023	6	2008024	6	24	0.0784375914126839	7.29503718206677
2008024	6	2008025	6	24	0.150171310716517	1.4361317582977
2008025	6	2008026	6	24	1.06794667860093	6.99334135266326
2008026	6	2008027	6	24	0.16736635134439	4.32902275700804
2008027	6	2008028	6	24	0.0814977000114148	0.154567549288358
2008028	6	2008029	6	24	0.161345077697917	1.02346369649229
2008029	6	2008030	6	24	0.0553825497178573	6.29224006330845
2008030	6	2008031	6	24	0	0.127831115709903
2008031	6	2008032	6	24	0.7314082086545	4.90596372828138
2008032	6	2008033	6	24	1.34374748113938	5.52027994574411
2008033	6	2008034	6	24	0.282770713507198	1.39632699655181
2008034	6	2008035	6	24	0	0.0074638245692282
2008035	6	2008036	6	24	0.0268496214987989	1.08043192123887
2008036	6	2008037	6	24	0.168975943624123	5.87724428033497
2008037	6	2008038	6	24	0.0787000599480666	2.43697503917031
2008038	6	2008039	6	24	0.0163709052190006	1.05748560351556
2008039	6	2008040	6	24	0.0017773506310256	0.342172896944967
2008040	6	2008041	6	24	0	4.46381898111525e-08
2008041	6	2008042	6	24	4.01001697223056e-13	0.0104015946474515
2008042	6	2008043	6	24	0.00113156716393171	0.0575251160717815
2008043	6	2008044	6	24	0.00162879332037543	0.118906644048595
2008044	6	2008045	6	24	0	9.20975502171769e-12
2008045	6	2008046	6	24	0	0
2008046	6	2008047	6	24	0	0
2008047	6	2008048	6	24	0	0.153780406711743
2008048	6	2008049	6	24	0	0.40368086659662
2008049	6	2008050	6	24	0	0.00270519368748029
2008050	6	2008051	6	24	0.0309186255301938	2.09038991722865
2008051	6	2008052	6	24	2.71845217910227e-11	3.40537191144297e-08
2008052	6	2008053	6	24	0.296641452735449	2.09898600215416
2008053	6	2008054	6	24	0.527589804521324	5.34482130089798
2008054	6	2008055	6	24	0.032620284473644	1.43891281617593
2008055	6	2008056	6	24	0.00637412363785188	1.86799038583341
2008056	6	2008057	6	24	0.0194103157025529	1.09975082738757
2008057	6	2008058	6	24	0.543954919663109	7.61478078767766
2008058	6	2008059	6	24	1.33788652424318e-05	0.00413729622570722
2008059	6	2008060	6	24	0	0.461124395169499
2008060	6	2008061	6	18	0.0419062940098957	5.02211524965419
2008182	6	2008183	6	6	0	0
2008183	6	2008184	6	24	0	0
2008184	6	2008185	6	24	0	0
2008185	6	2008186	6	24	0	0
2008186	6	2008187	6	24	0	0
2008187	6	2008188	6	24	0	0
2008188	6	2008189	6	24	0.00503657438421214	3.22938921587146
2008189	6	2008190	6	24	0.0388814159671892	5.59704236522503
2008190	6	2008191	6	24	0.0472554667600683	12.3305632680489
2008191	6	2008192	6	24	0	0
2008192	6	2008193	6	24	0.0124901372217461	4.56173487835023
2008193	6	2008194	6	24	0.00311251818351661	1.06014934019186
2008194	6	2008195	6	24	0.0215122389357466	1.35882077275205
2008195	6	2008196	6	24	0.00296677596081281	0.42501361502106
2008196	6	2008197	6	24	0.000652070105760469	0.0585731289013319
2008197	6	2008198	6	24	0.0137859756227252	0.898268840240127
2008198	6	2008199	6	24	0.0672892035939731	1.97367012759074
2008199	6	2008200	6	24	0.0255054847185966	11.9937084680709
2008200	6	2008201	6	24	0.00326776650501784	3.71990148103014
2008201	6	2008202	6	24	0.021344768240524	12.3752772788799
2008202	6	2008203	6	24	0.026850709965763	1.62833522283012
2008203	6	2008204	6	24	0.0001541305356659	0.514587331564158
2008204	6	2008205	6	24	0.000252639922691742	0.281012746272609
2008205	6	2008206	6	24	0	0
2008206	6	2008207	6	24	0	0
2008207	6	2008208	6	24	0	0
2008208	6	2008209	6	24	0	0
2008209	6	2008210	6	24	0	0
2008210	6	2008211	6	24	0	0
2008211	6	2008212	6	24	0	0
2008212	6	2008213	6	24	0	0
2008213	6	2008214	6	24	0	0
2008214	6	2008215	6	24	0.00297103074452025	1.14682200941695
2008215	6	2008216	6	24	0.00266702463672089	4.97494951491833
2008216	6	2008217	6	24	0.0244694113422884	6.8737810861785
2008217	6	2008218	6	24	0.0270499172895507	9.13822597358376
2008218	6	2008219	6	24	9.38898704089077e-15	0.0592556021257372
2008219	6	2008220	6	24	0.00440878541246245	0.721280732360353
2008220	6	2008221	6	24	0.0205093372879057	18.531189695404
2008221	6	2008222	6	24	0.000487860243100065	1.67390516077835
2008222	6	2008223	6	24	0.0667364465894161	5.46702164794793
2008223	6	2008224	6	24	0.255537791413998	13.4958271216656
2008224	6	2008225	6	24	0.017123360807891	2.46322822378716
2008225	6	2008226	6	24	0.0696825316544747	16.2501645258601
2008226	6	2008227	6	24	0.553521106259432	18.2736462617698
2008227	6	2008228	6	24	0.0423012554494198	2.28670465017785
2008228	6	2008229	6	24	0	0
2008229	6	2008230	6	24	0	0
2008230	6	2008231	6	24	4.03950409616908e-08	0.361561053895371
2008231	6	2008232	6	24	0.0026730044228287	0.126973264381564
2008232	6	2008233	6	24	0.0301276061896598	4.83750376507306
2008233	6	2008234	6	24	0.111678924060543	14.1810574187654
2008234	6	2008235	6	24	0	0.0132469416712411
2008235	6	2008236	6	24	0.00245979796773826	1.55551022162302
2008236	6	2008237	6	24	0.00301161869415621	7.70610425086488
2008237	6	2008238	6	24	8.17627536307652e-05	0.165019459394072
2008238	6	2008239	6	24	0.0190123607049912	4.11631384089279
2008239	6	2008240	6	24	0.0214635803416107	0.826189204238925
2008240	6	2008241	6	24	0.091812773941692	7.60864907213758
2008241	6	2008242	6	24	0	0
2008242	6	2008243	6	24	0	0
2008243	6	2008244	6	18	0	0
