# Supplementary material for: A comparison of sea salt emission parameterizations in northwestern Europe using a chemistry transport model setup
Source: Copernicus journal article supplement (doi:10.5194/acp-16-9905-2016), 2016-08-08
Supplement: Supplementary file 2 [file acp-16-9905-2016-supplement.zip › wetdep/wetdep.timeseries.values.SE0014R.zero.moreStations.csv]

doy_start	hour_start	doy_end	hour_end	n_vals	Na in kg/ha/d	precip in mm/d
2008001	6	2008002	6	24	2.06839159703338e-20	0.131563638113135
2008002	6	2008003	6	24	3.07542379619085e-28	0.00262306734416502
2008003	6	2008004	6	24	0	0
2008004	6	2008005	6	24	0	0
2008005	6	2008006	6	24	1.45226559406934e-18	1.98726239824182
2008006	6	2008007	6	24	7.3845585150321e-18	3.78898474854585
2008007	6	2008008	6	24	1.6756273992783e-19	2.8003983166127
2008008	6	2008009	6	24	1.21749828412543e-18	7.77062909202047
2008009	6	2008010	6	24	1.00575699219606e-18	3.09702211819401
2008010	6	2008011	6	24	2.46832875233268e-18	6.70931782847062
2008011	6	2008012	6	24	5.28341137363671e-19	4.72270323822515
2008012	6	2008013	6	24	2.08041195376385e-19	1.54169484192737
2008013	6	2008014	6	24	3.20900523704845e-21	0.381687715019116
2008014	6	2008015	6	24	1.94606665481193e-18	1.23303623564766
2008015	6	2008016	6	24	1.26134453548651e-18	14.1052793966082
2008016	6	2008017	6	24	2.76652784069149e-19	1.14390074987284
2008017	6	2008018	6	24	3.62262898604427e-19	5.43326985109847
2008018	6	2008019	6	24	1.32516311584078e-18	7.56533277053677
2008019	6	2008020	6	24	5.82371873634061e-18	1.57770066765941
2008020	6	2008021	6	24	6.0164866256241e-22	1.20335080956844
2008021	6	2008022	6	24	0	0.000172517057016381
2008022	6	2008023	6	24	0	3.57032698758889e-11
2008023	6	2008024	6	24	8.35428572222232e-19	7.29503718206677
2008024	6	2008025	6	24	2.17109017902066e-18	1.4361317582977
2008025	6	2008026	6	24	5.13285838592884e-19	6.99334135266326
2008026	6	2008027	6	24	2.07977778384263e-18	4.32902275700804
2008027	6	2008028	6	24	4.96959453322859e-20	0.154567549288358
2008028	6	2008029	6	24	1.06346883296683e-19	1.02346369649229
2008029	6	2008030	6	24	7.75955672852044e-19	6.29224006330845
2008030	6	2008031	6	24	0	0.127831115709903
2008031	6	2008032	6	24	4.63858104795938e-18	4.90596372828138
2008032	6	2008033	6	24	1.54585354584427e-17	5.52027994574411
2008033	6	2008034	6	24	6.33795631630853e-18	1.39632699655181
2008034	6	2008035	6	24	0	0.0074638245692282
2008035	6	2008036	6	24	3.37611046444475e-19	1.08043192123887
2008036	6	2008037	6	24	1.60852900146228e-18	5.87724428033497
2008037	6	2008038	6	24	1.19727023558185e-18	2.43697503917031
2008038	6	2008039	6	24	3.58324441384952e-19	1.05748560351556
2008039	6	2008040	6	24	2.67101789018817e-20	0.342172896944967
2008040	6	2008041	6	24	0	4.46381898111525e-08
2008041	6	2008042	6	24	7.20344323010283e-30	0.0104015946474515
2008042	6	2008043	6	24	5.27430199205081e-20	0.0575251160717815
2008043	6	2008044	6	24	6.81335944850678e-20	0.118906644048595
2008044	6	2008045	6	24	0	9.20975502171769e-12
2008045	6	2008046	6	24	0	0
2008046	6	2008047	6	24	0	0
2008047	6	2008048	6	24	0	0.153780406711743
2008048	6	2008049	6	24	0	0.40368086659662
2008049	6	2008050	6	24	0	0.00270519368748029
2008050	6	2008051	6	24	3.27779614255214e-20	2.09038991722865
2008051	6	2008052	6	24	3.28371845122764e-28	3.40537191144297e-08
2008052	6	2008053	6	24	1.0503735567729e-18	2.09898600215416
2008053	6	2008054	6	24	4.9068246584986e-18	5.34482130089798
2008054	6	2008055	6	24	1.43780297927635e-19	1.43891281617593
2008055	6	2008056	6	24	6.65312140224251e-20	1.86799038583341
2008056	6	2008057	6	24	1.48427960393033e-19	1.09975082738757
2008057	6	2008058	6	24	1.21039638358439e-18	7.61478078767766
2008058	6	2008059	6	24	3.33703580134873e-23	0.00413729622570722
2008059	6	2008060	6	24	0	0.461124395169499
2008060	6	2008061	6	18	1.67238447541863e-19	5.02211524965419
2008182	6	2008183	6	6	0	0
2008183	6	2008184	6	24	0	0
2008184	6	2008185	6	24	0	0
2008185	6	2008186	6	24	0	0
2008186	6	2008187	6	24	0	0
2008187	6	2008188	6	24	0	0
2008188	6	2008189	6	24	3.44263722722805e-18	3.22938921587146
2008189	6	2008190	6	24	9.33232614008435e-18	5.59704236522503
2008190	6	2008191	6	24	1.38178708850318e-17	12.3305632680489
2008191	6	2008192	6	24	0	0
2008192	6	2008193	6	24	5.33235410223324e-18	4.56173487835023
2008193	6	2008194	6	24	7.64974245744734e-19	1.06014934019186
2008194	6	2008195	6	24	1.79996162443308e-18	1.35882077275205
2008195	6	2008196	6	24	3.31234270051324e-19	0.42501361502106
2008196	6	2008197	6	24	4.18272221786428e-20	0.0585731289013319
2008197	6	2008198	6	24	8.90231950305072e-19	0.898268840240127
2008198	6	2008199	6	24	2.32502195028889e-18	1.97367012759074
2008199	6	2008200	6	24	1.6316267071788e-17	11.9937084680709
2008200	6	2008201	6	24	2.60340256199878e-18	3.71990148103014
2008201	6	2008202	6	24	1.50746704780731e-17	12.3752772788799
2008202	6	2008203	6	24	2.20361000524099e-18	1.62833522283012
2008203	6	2008204	6	24	1.50698581061884e-19	0.514587331564158
2008204	6	2008205	6	24	2.17580950879889e-19	0.281012746272609
2008205	6	2008206	6	24	0	0
2008206	6	2008207	6	24	0	0
2008207	6	2008208	6	24	0	0
2008208	6	2008209	6	24	0	0
2008209	6	2008210	6	24	0	0
2008210	6	2008211	6	24	0	0
2008211	6	2008212	6	24	0	0
2008212	6	2008213	6	24	0	0
2008213	6	2008214	6	24	0	0
2008214	6	2008215	6	24	3.85499705452201e-18	1.14682200941695
2008215	6	2008216	6	24	2.87991895919078e-18	4.97494951491833
2008216	6	2008217	6	24	8.6645346725774e-18	6.8737810861785
2008217	6	2008218	6	24	1.16477644378347e-17	9.13822597358376
2008218	6	2008219	6	24	5.96762826159549e-30	0.0592556021257372
2008219	6	2008220	6	24	1.11208170795752e-18	0.721280732360353
2008220	6	2008221	6	24	8.92953007636386e-18	18.531189695404
2008221	6	2008222	6	24	5.42551991689066e-19	1.67390516077835
2008222	6	2008223	6	24	1.9820148776603e-18	5.46702164794793
2008223	6	2008224	6	24	1.64614711141444e-17	13.4958271216656
2008224	6	2008225	6	24	8.99623751472558e-19	2.46322822378716
2008225	6	2008226	6	24	2.21499678992263e-17	16.2501645258601
2008226	6	2008227	6	24	2.54837715666836e-17	18.2736462617698
2008227	6	2008228	6	24	2.02072932825087e-18	2.28670465017785
2008228	6	2008229	6	24	0	0
2008229	6	2008230	6	24	0	0
2008230	6	2008231	6	24	1.97008343071498e-24	0.361561053895371
2008231	6	2008232	6	24	4.97904609671218e-19	0.126973264381564
2008232	6	2008233	6	24	5.87677184434379e-18	4.83750376507306
2008233	6	2008234	6	24	1.7026227437128e-17	14.1810574187654
2008234	6	2008235	6	24	0	0.0132469416712411
2008235	6	2008236	6	24	2.06346441709342e-18	1.55551022162302
2008236	6	2008237	6	24	4.52661854905484e-18	7.70610425086488
2008237	6	2008238	6	24	5.80115549515684e-20	0.165019459394072
2008238	6	2008239	6	24	5.11172325807141e-18	4.11631384089279
2008239	6	2008240	6	24	6.25179670642878e-19	0.826189204238925
2008240	6	2008241	6	24	3.80564936291287e-18	7.60864907213758
2008241	6	2008242	6	24	0	0
2008242	6	2008243	6	24	0	0
2008243	6	2008244	6	18	0	0
